# Supplementary material for: Comparison of ozone measurement methods in biomass burning smoke: an evaluation under field and laboratory conditions
Source: Copernicus journal article supplement (doi:10.5194/amt-14-1783-2021), 2021-03-04
Supplement: Supplementary file 1 [file amt-14-1783-2021-supplement.pdf]

Supplement of Atmos. Meas. Tech., 14, 1783–1800, 2021  
<https://doi.org/10.5194/amt-14-1783-2021-supplement>  
© Author(s) 2021. This work is distributed under  
the Creative Commons Attribution 4.0 License.

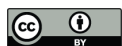

*Supplement of*

## **Comparison of ozone measurement methods in biomass burning smoke: an evaluation under field and laboratory conditions**

**Russell W. Long et al.**

*Correspondence to:* Russell W. Long ([long.russell@epa.gov](mailto:long.russell@epa.gov))

The copyright of individual parts of the supplement might differ from the CC BY 4.0 License.

## Tables.

Table S1. Ozone method manufacturer provided performance specifications.

## Figures.

Figure S1. Time series of O<sub>3</sub>, CO, and NO<sub>2</sub> for the four March 2017 Kansas burn days.

Figure S2. Time series of O<sub>3</sub>, CO, and NO<sub>2</sub> for the October 2017 Sycan Marsh (Oregon) burn day.

Figure S3. Time series of O<sub>3</sub>, CO, and NO<sub>2</sub> for the November 2017 Kansas burns. The November 10 burn occurred at Konza Prairie and the November 13 and 15 burns were conducted at Tallgrass Prairie.

Figure S4. Time series of O<sub>3</sub>, CO, and NO<sub>2</sub> for the 2018 USFS chamber burns in Missoula, MT.

Figure S5. Time series of O<sub>3</sub>, CO, and NO<sub>2</sub> for the 2019 USFS chamber burns in Missoula, MT.

Figure S6. Time series of the UV-C positive O<sub>3</sub> analytical artifact ( $\Delta O_{3(UV-C)}$ ) and CO comparison from the three prescribed burning periods. Top-Konza Prairie (KS) March 2017; middle-Sycan Marsh (OR) October 2017; and bottom-Konza Prairie and Tallgrass Prairie (KS) November 2017.

Figure S7. Scatter plots between O<sub>3</sub> differences and the THC measurements within the grassland fires smoke plumes.

Figure S8. Scatter plots between  $\Delta O_3$  and the CAPS NO<sub>2</sub> measurements within the grassland fires smoke plumes.

Figure S9. Scatter plots between FRM and FEM O<sub>3</sub> differences and CO, NO<sub>2</sub>, and THC for all in-plume (burn period only) measurements made during the 2018 and 2019 Missoula Fire Chamber studies. Observation points have been colored by the O<sub>3</sub> instrument. Over all observations there is little correlation between the O<sub>3</sub> instrument differences, but straight line structures within the overall scatters indicate that individual burn events measured in the chamber have good correlations with distinct ratios.

Figure S10. Scatter plots between FRM and FEM O<sub>3</sub> differences and CO, NO<sub>2</sub>, and THC for measurements collected in-plume during a single burn event during the 2018 and 2019 Missoula Fire Chamber campaigns. Observation points have been colored by the O<sub>3</sub> instrument. In Figure S9, the regressions had low overall correlation over all in-smoke points, individual burn events measured in the chamber have good correlations with distinct ratios.

## Data.

Meta data

Konza Prairie March 2017

Sycan Marsh October 2017

Konza Prairie November 2017

Tallgrass Prairie November 2017

USFS Missoula Chamber 2018

USFS Missoula Chamber 2019

**Table S1. Ozone method manufacturer provided performance specifications.**

| <b>Performance Parameter</b>  | <b>TAPI T265 (NO-CL)</b> | <b>Thermo 49i (UV-C)</b> | <b>2B 205 (UV-C-H)</b> | <b>2B 211 (SL-UV)</b> | <b>2B 211-G (UV-G)</b> |
|-------------------------------|--------------------------|--------------------------|------------------------|-----------------------|------------------------|
| <b>Sample Flow Rate</b>       | 500 cc/min ±10%          | 1 L/min                  | 1.8 L/min              | 2 L/min               | 2 L/min                |
| <b>Range</b>                  | 0-2000 ppb               | 0 – 200 ppm              | 0 – 250 ppm            | 0-2000 ppb            | 0 – 500 ppb            |
| <b>Noise<sup>1</sup></b>      | < 0.15 ppb               | < 0.25 ppb               | NA <sup>2</sup>        | NA <sup>2</sup>       | NA <sup>2</sup>        |
| <b>LDL<sup>3</sup></b>        | < 0.3 ppb                | 0.5 ppb                  | 2.0 ppb                | 1.0 ppb               | 1.0 ppb                |
| <b>Zero drift<sup>4</sup></b> | < 0.5 ppb                | < 1.0 ppb                | < 1.0 ppb              | < 1.0 ppb             | < 1.0 ppb              |
| <b>Span drift<sup>5</sup></b> | < 0.5%                   | < 1.0%                   | < 1.0%                 | < 0.5%                | < 0.5%                 |
| <b>Precision<sup>6</sup></b>  | < 0.5%                   | < 1%                     | < 2%                   | < 1%                  | < 1%                   |

<sup>1</sup>Noise is determined as the standard deviation of a series of measurements of a constant concentration about the mean and is expressed in concentration units.

<sup>2</sup>Values not specified by manufacturer

<sup>3</sup>Lower detectable limit

<sup>4</sup>Zero drift is the change in measurement response to zero pollutant concentration over a 24-hour period of continuous unadjusted operation.

<sup>5</sup>Span drift is the percent change in measurement response to an up-scale (80% of the upper range level) pollutant concentration over a 24-hour period of continuous unadjusted operation.

<sup>6</sup>Precision is the variation about the mean of repeated measurements of the same pollutant concentration, denoted as the standard deviation expressed as a percentage of the upper range limit.

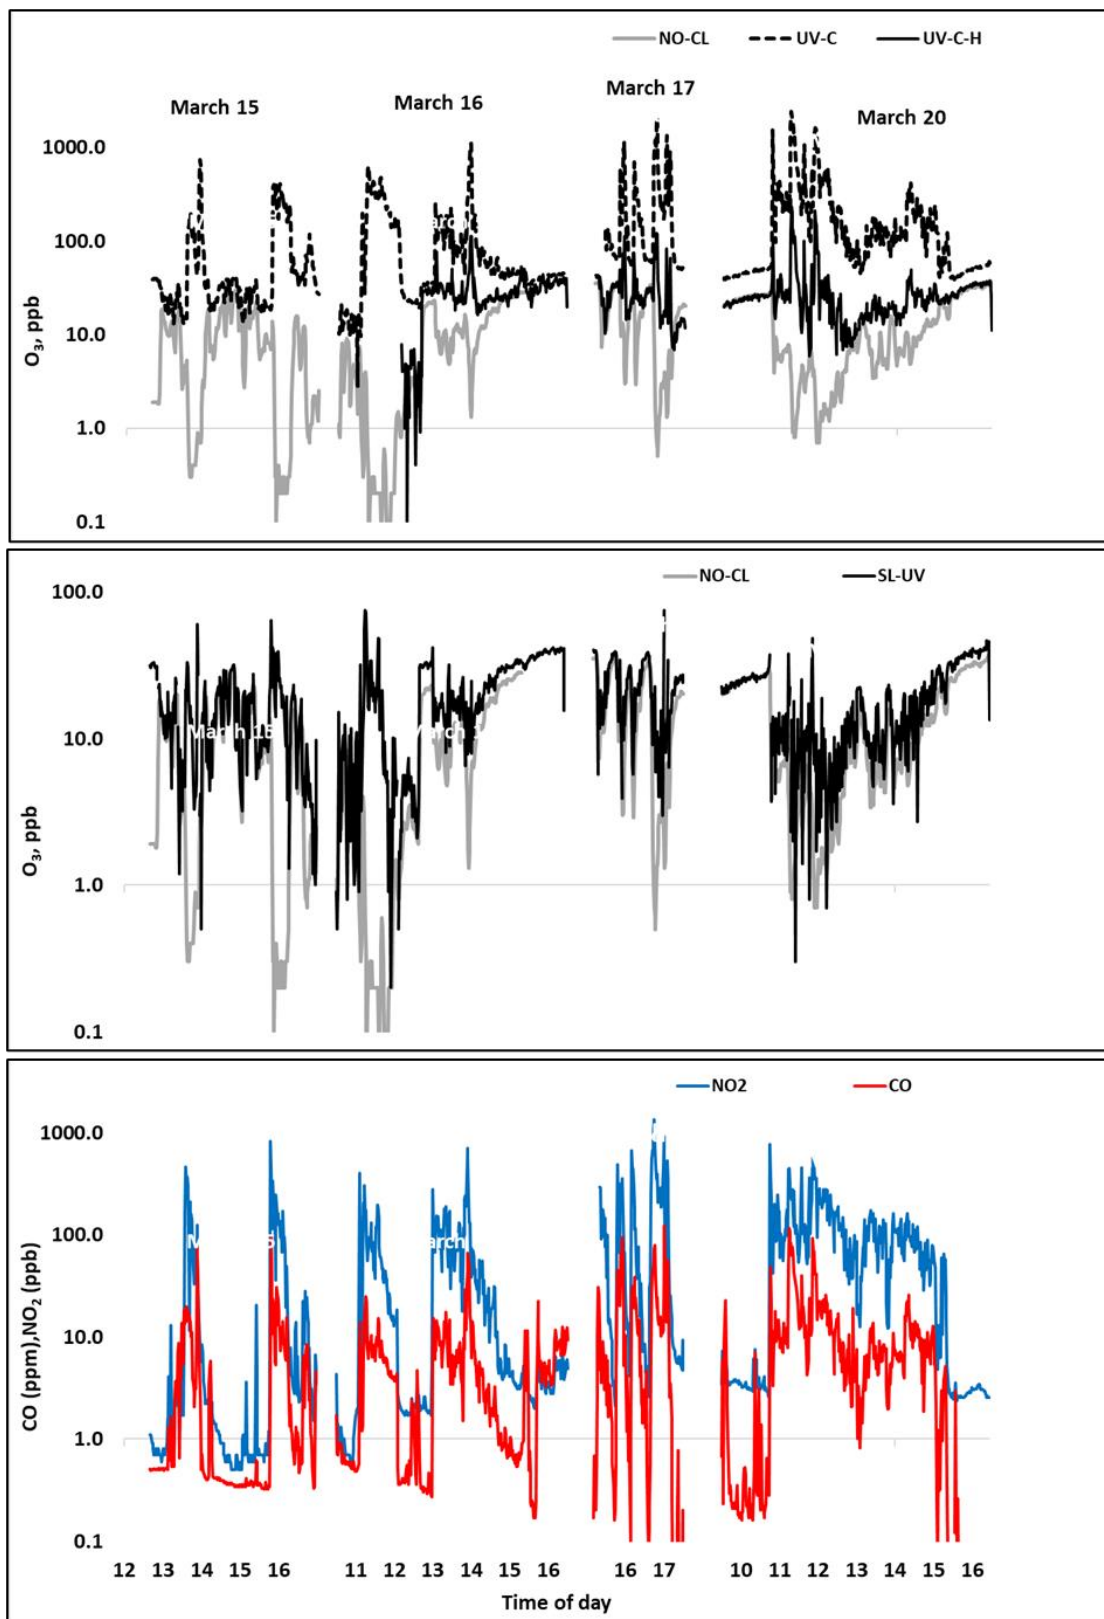

**Figure S1.** Time series of O<sub>3</sub>, CO, and NO<sub>2</sub> for the four March 2017 Kansas burn days. All concentrations are displayed in a logarithmic scale.

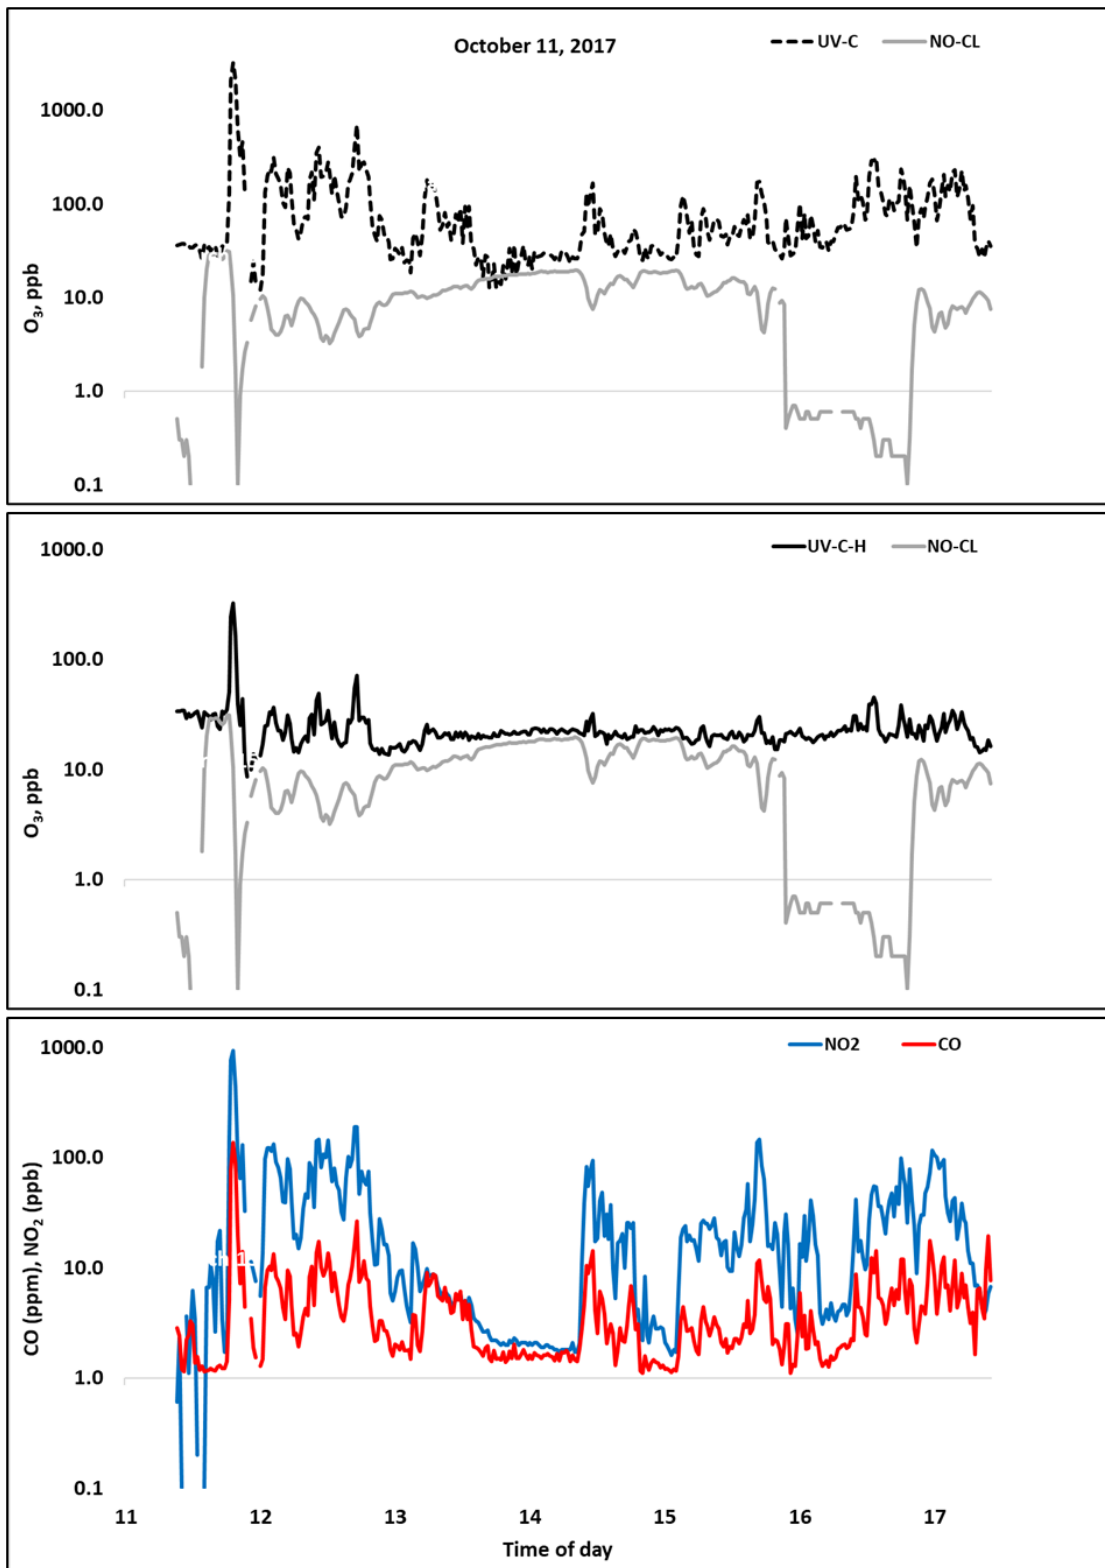

**Figure S2.** Time series of O<sub>3</sub>, CO, and NO<sub>2</sub> for the October 2017 Sycan Marsh (Oregon) burn day. All concentrations are displayed in a logarithmic scale.

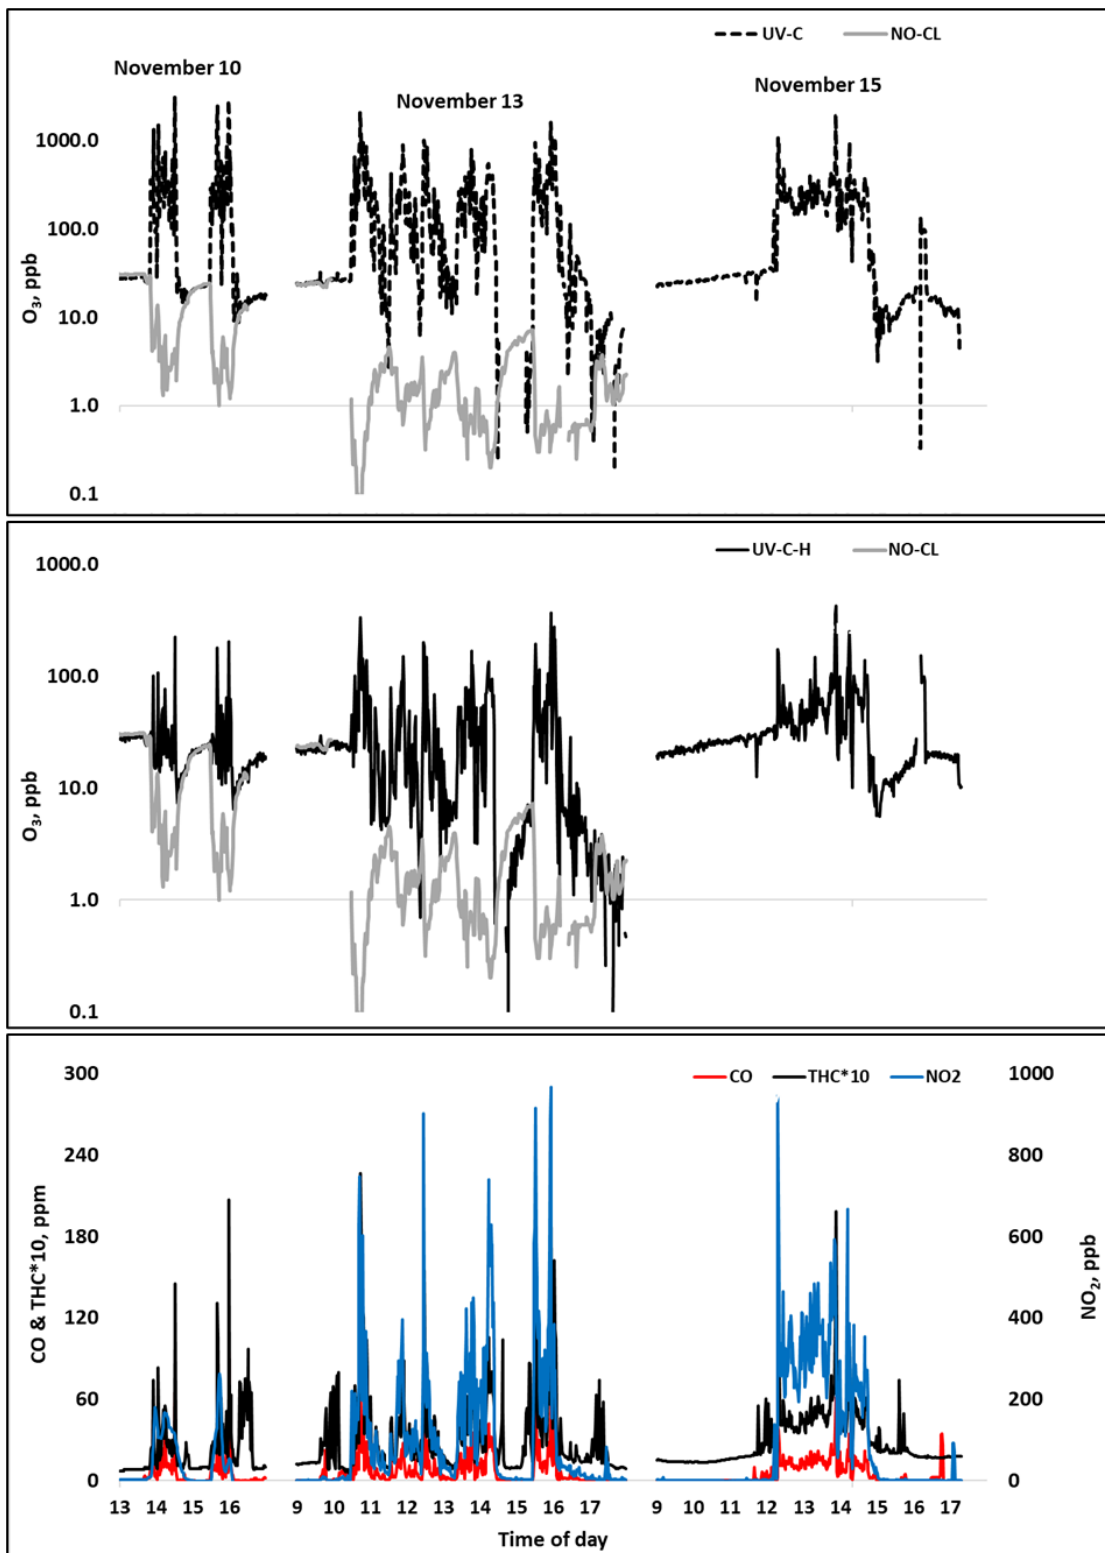

**Figure S3.** Time series of O<sub>3</sub>, CO, and NO<sub>2</sub> for the November 2017 Kansas burns. The November 10 burn occurred at Konza Prairie and the November 13 and 15 burns were conducted at Tallgrass Prairie. Ozone concentrations are displayed in a logarithmic scale.

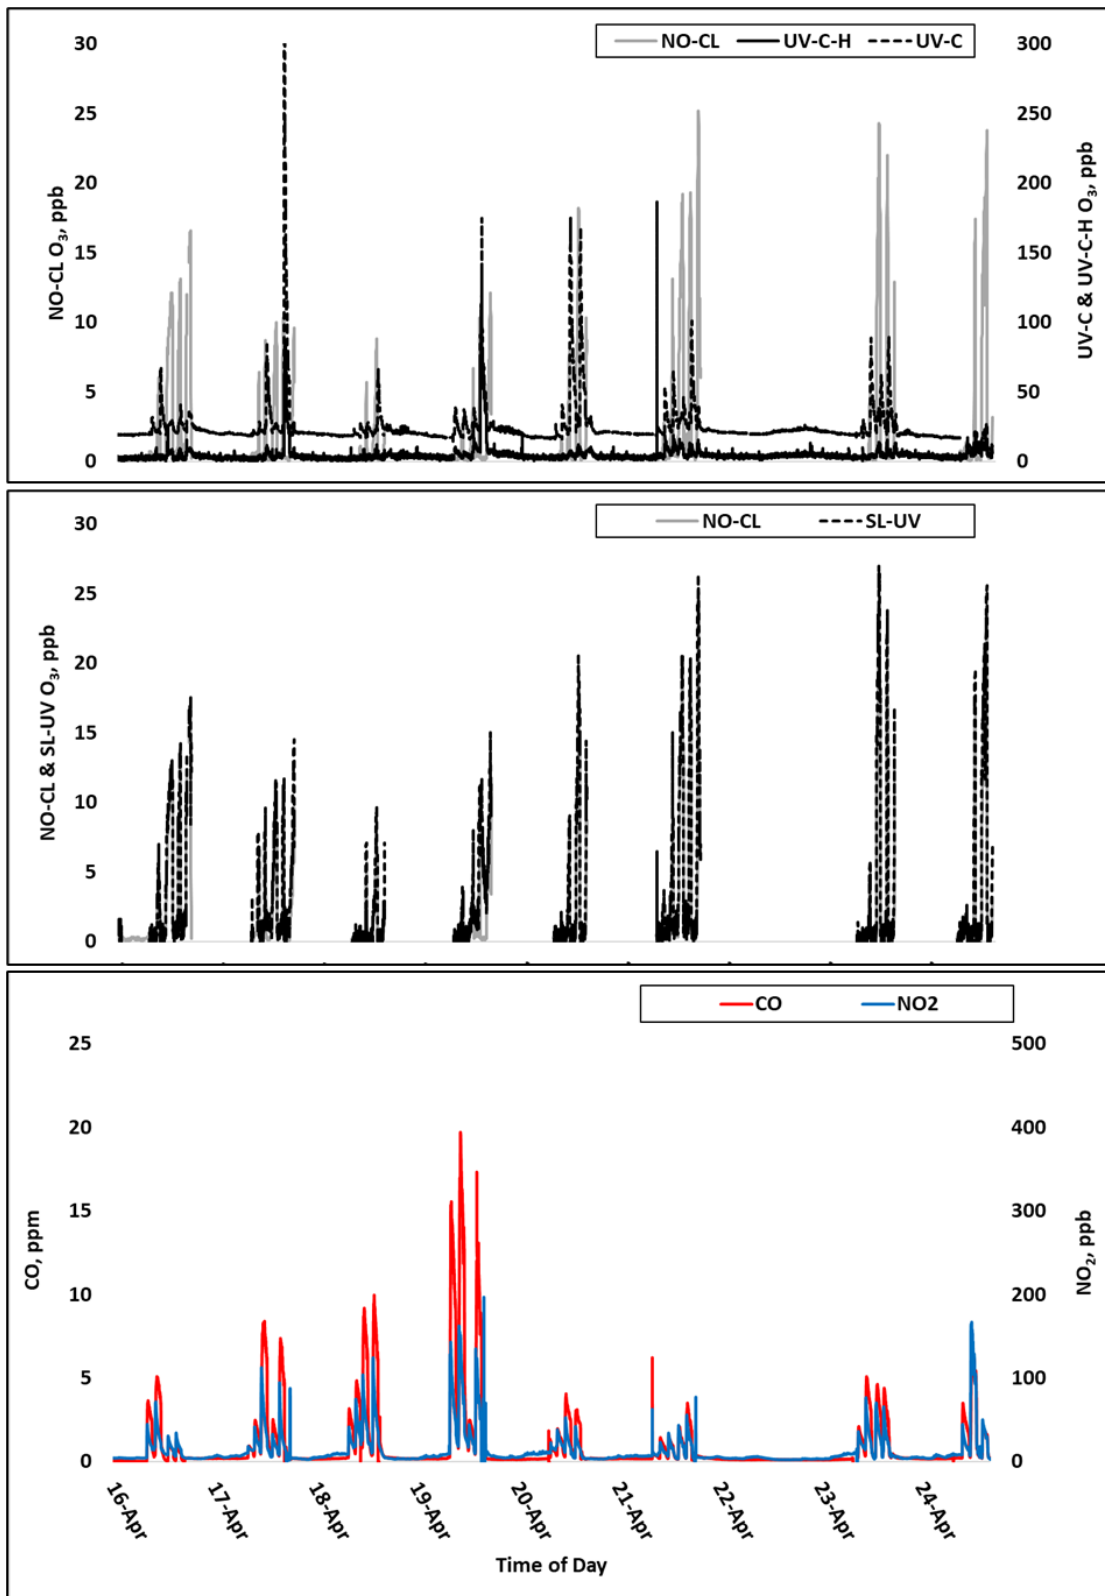

**Figure S4.** Time series of O<sub>3</sub>, CO, and NO<sub>2</sub> for the 2018 USFS chamber burns in Missoula, MT.

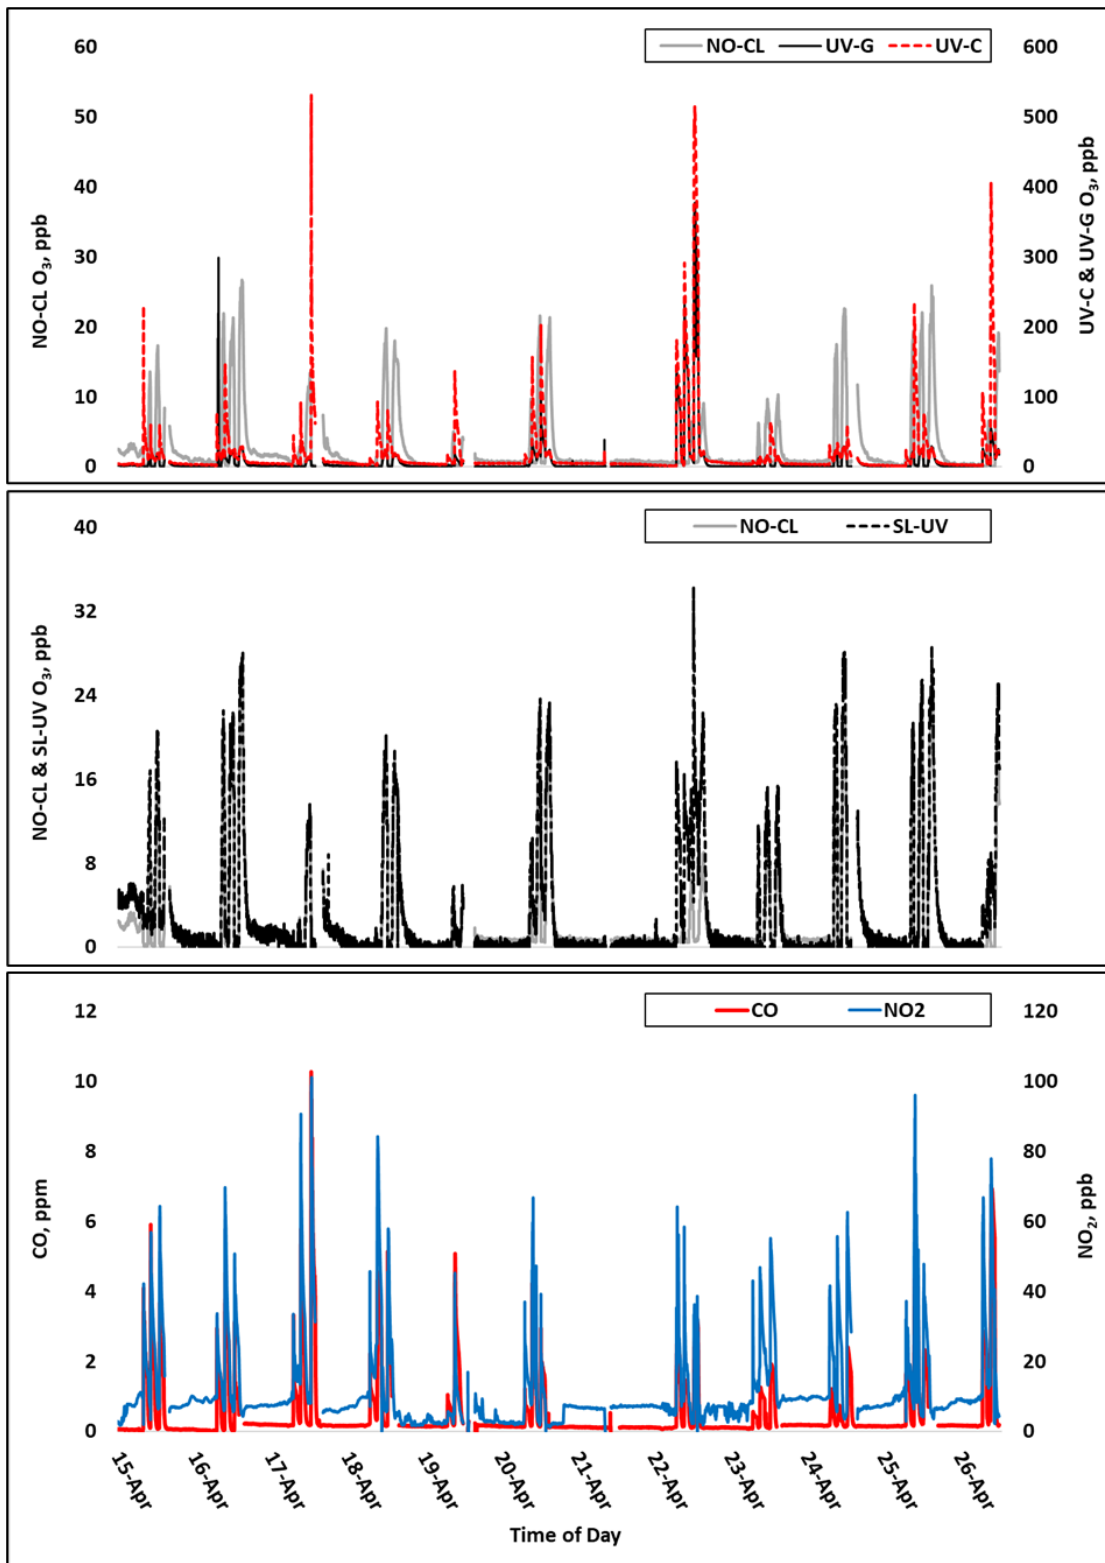

**Figure S5.** Time series of O<sub>3</sub>, CO, and NO<sub>2</sub> for the 2019 USFS chamber burns in Missoula, MT.



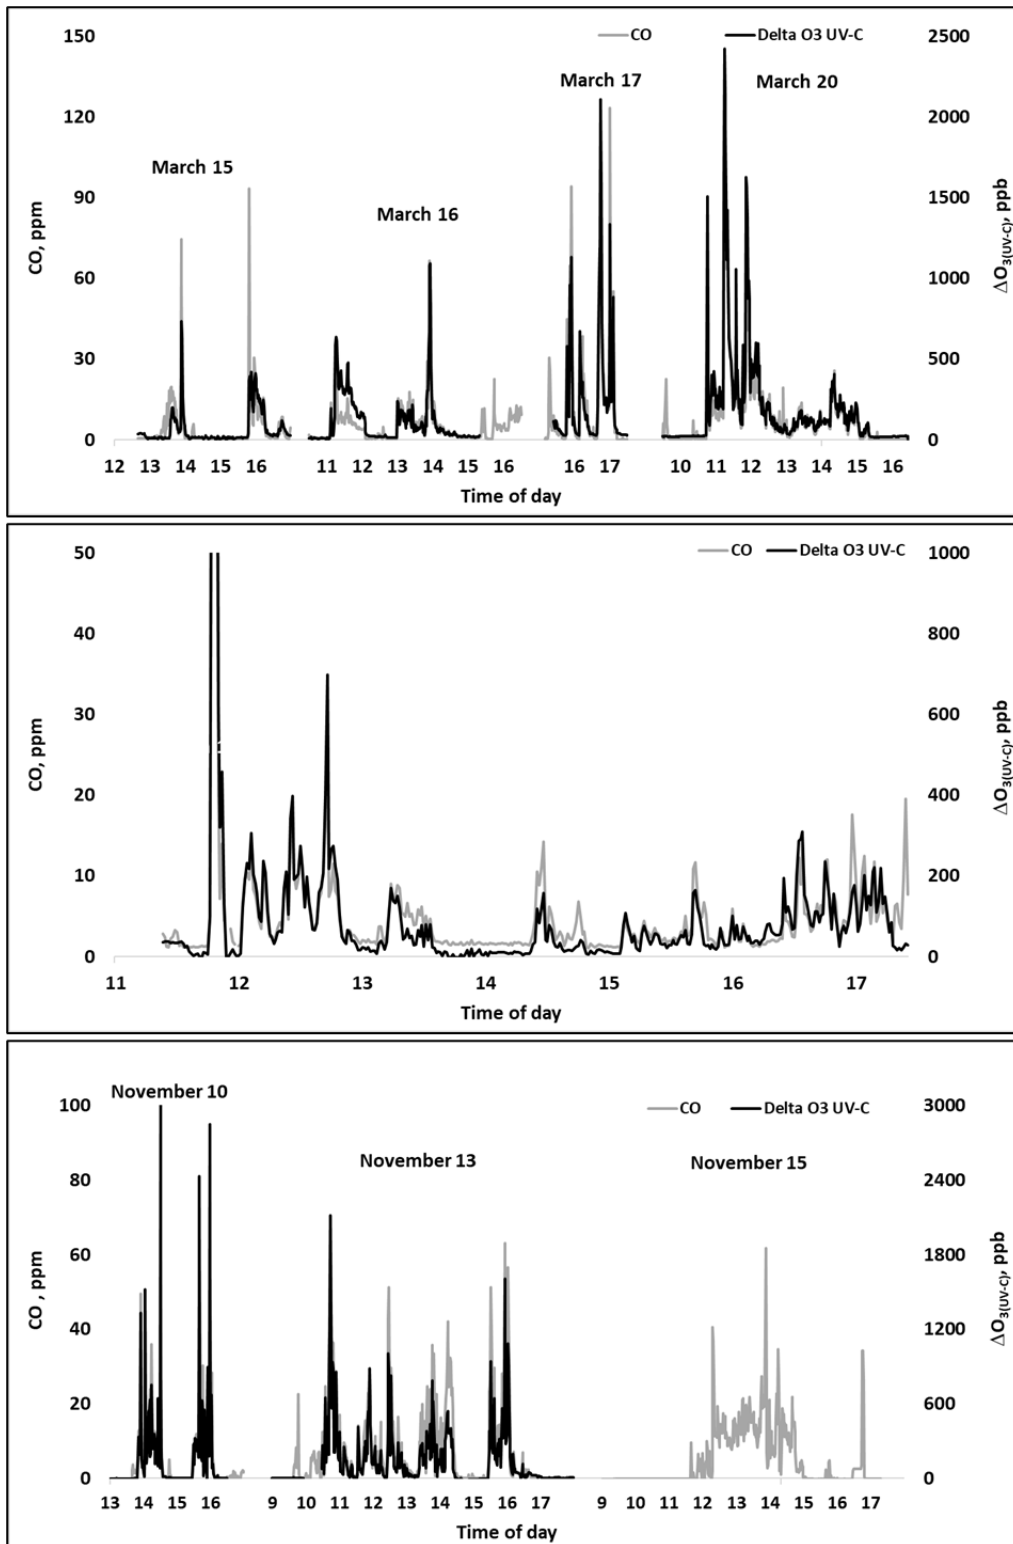

**Figure S6.** Time series of the UV-C positive  $O_3$  analytical artifact ( $\Delta O_3(\text{UV-C})$ ) and CO comparison from the three prescribed burning periods. Top-Konza Prairie (KS) March 2017; middle-Sycan Marsh (OR) October 2017; and bottom-Konza Prairie and Tallgrass Prairie (KS) November 2017.

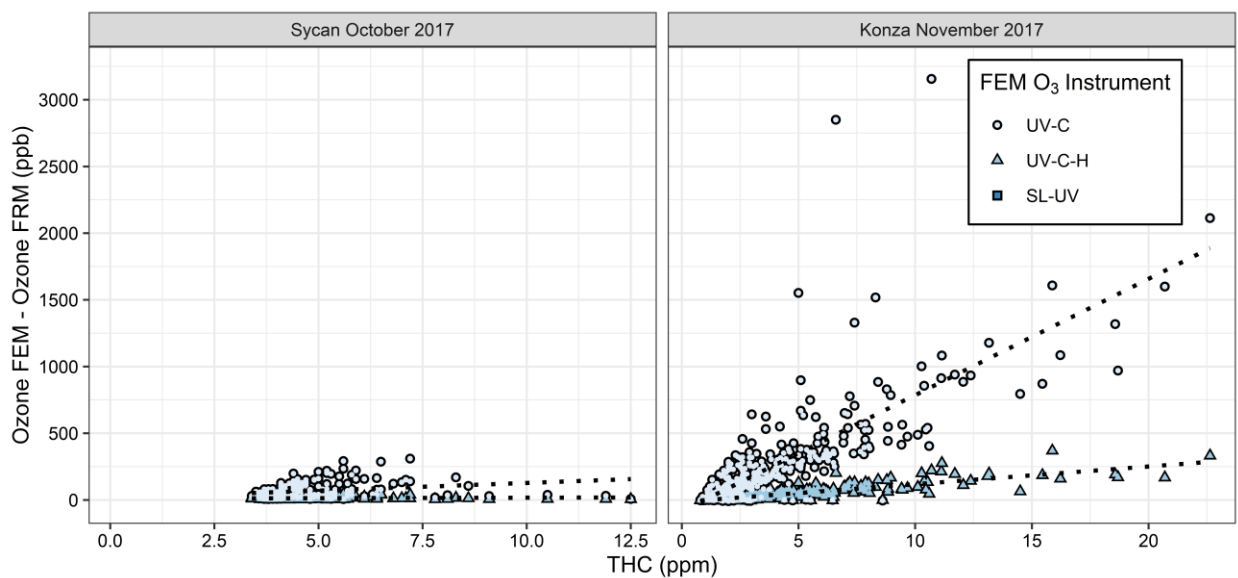

**Figure S7.** Scatter plots between Ozone differences and the THC measurements within the grassland fires smoke plumes.

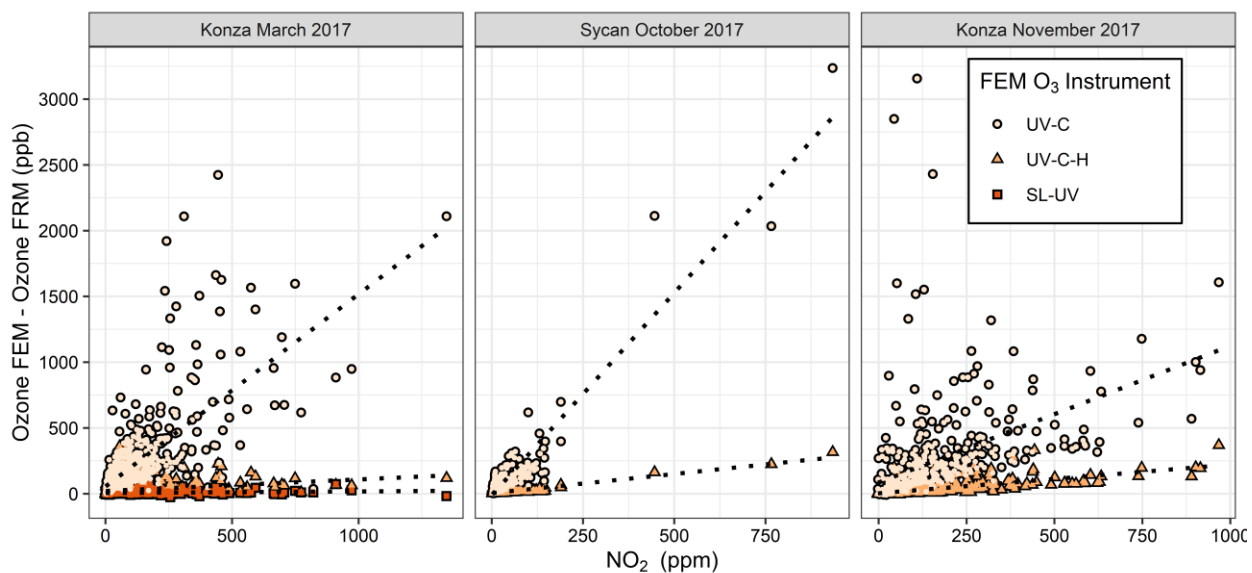

**Figure S8.** Scatter plots between  $\Delta O_3$  and the CAPS NO<sub>2</sub> measurements within the grassland fires smoke plumes.

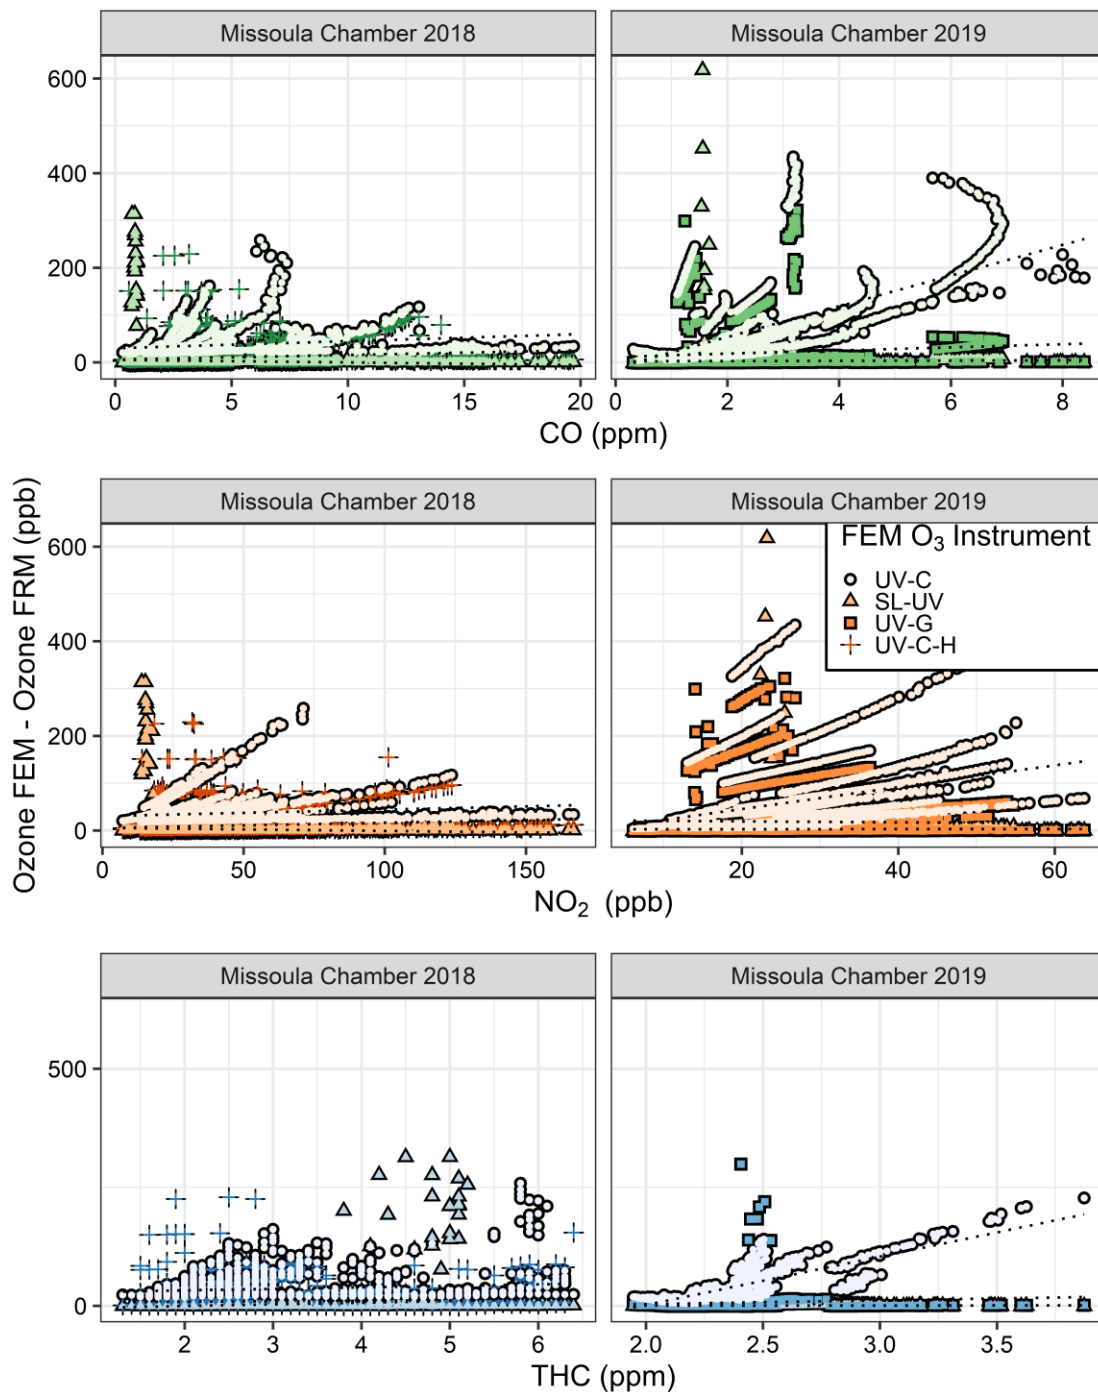

**Figure S9.** Scatter plots between FRM and FEM O<sub>3</sub> differences and CO, NO<sub>2</sub>, and THC for all in-plume (burn period only) measurements made during the 2018 and 2019 Missoula Fire Chamber studies. Observation points have been colored by the O<sub>3</sub> instrument. Over all observations there is little correlation between the O<sub>3</sub> instrument differences, but straight line structures within the overall scatters indicate that individual burn events measured in the chamber have good correlations with distinct ratios.

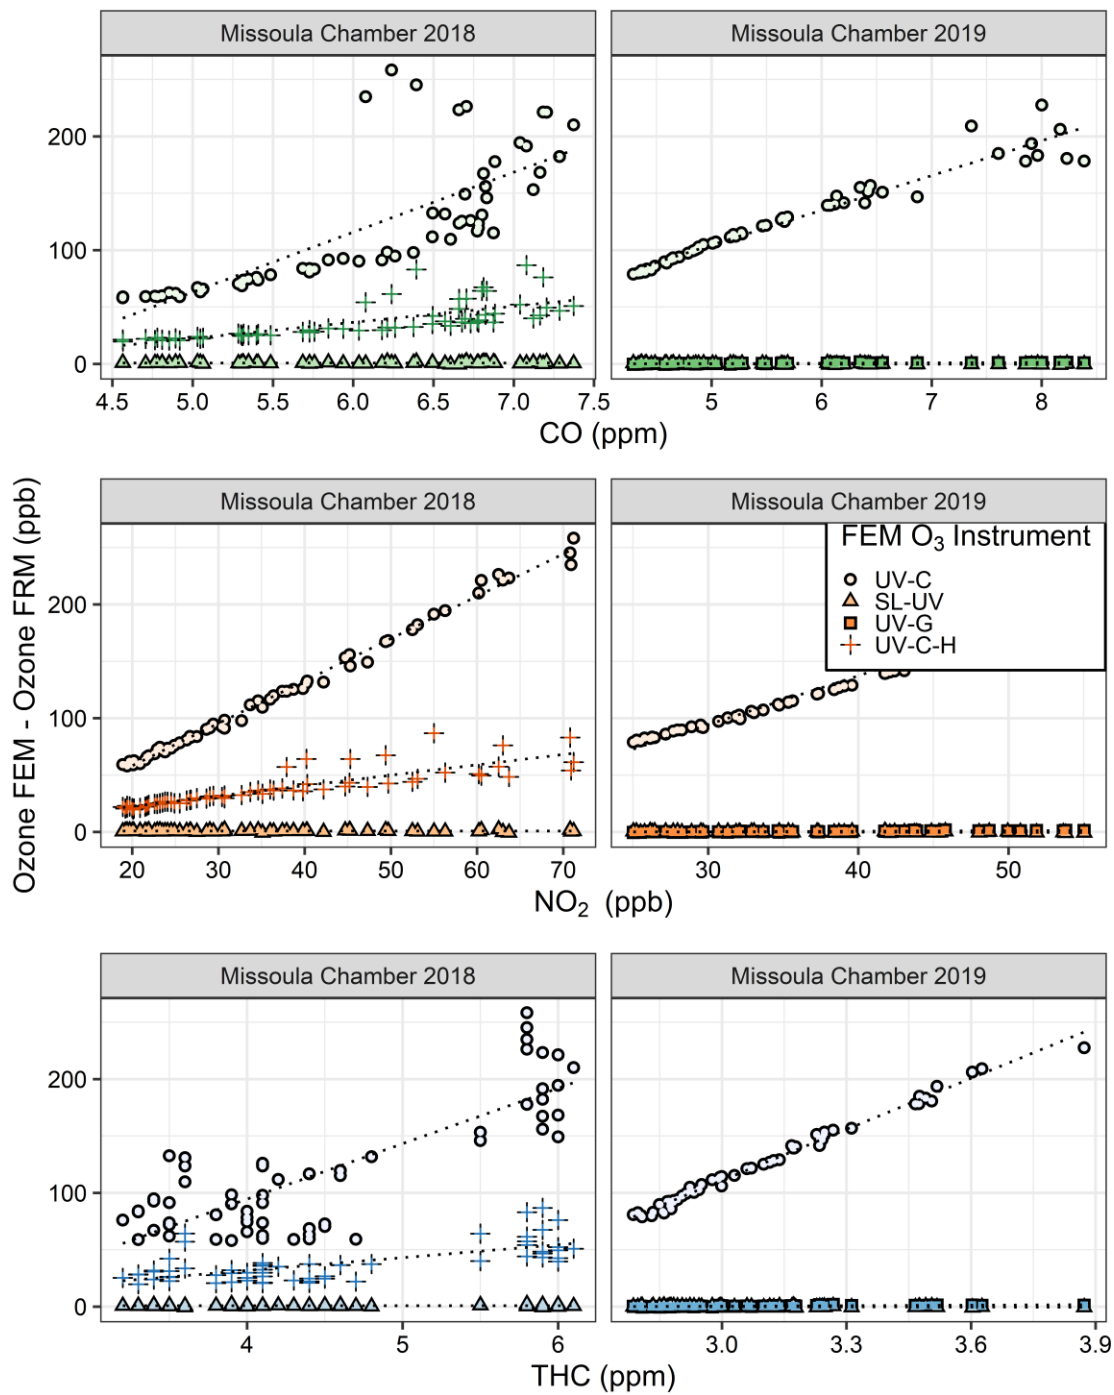

**Figure S10.** Scatter plots between FRM and FEM O<sub>3</sub> differences and CO, NO<sub>2</sub>, and THC for measurements collected in-plume during a single burn event during the 2018 and 2019 Missoula Fire Chamber campaigns. Observation points have been colored by the O<sub>3</sub> instrument. In Figure S9, the regressions had low overall correlation over all in-smoke points, but individual burn events measured in the chamber have good correlations with distinct ratios.

| Variable  | Instrument                                                  | Units/Format     | Comments                            |
|-----------|-------------------------------------------------------------|------------------|-------------------------------------|
| Date&Time | ---                                                         | MM/DD/YYYY HH:MM |                                     |
| O3 NO-CL  | Teledyne API Model T265 Ozone FRM Analyzer                  | ppb              | FRM - NO Chemiluminescence          |
| O3 SL-UV  | 2B Technologies Model 211 Ozone FEM Analyzer                | ppb              | FEM - UV Photometric                |
| O3 UV-C-H | 2B Technologies Model 205 Ozone FEM Analyzer                | ppb              | FEM - UV Photometric                |
| O3 UV-C   | Thermo Environmental Model 49C/49i Ozone FEM Analyzer       | ppb              | FEM - UV Photometric                |
| O3 UV-G   | 2B Technologies Model 211-G Ozone FEM Analyzer              | ppb              | FEM - UV Photometric                |
| NO2-C     | Teledyne API Model T500U Nitrogen Dioxide FEM Analyzer      | ppb              | FEM - Cavity Attenuated Phase Shift |
| NO        | Teledyne API Model T200 Nitrogen Oxide FRM Analyzer         | ppb              | FRM - O3 Chemiluminescence          |
| CO        | Thermo Environmental Model 48C Carbon Monoxide FRM Analyzer | ppm              | FRM - NDIR                          |
| THC       | Thermo Environmental Model 51i Total Hydrocarbon Analyzer   | ppm              |                                     |

FRM - Federal Reference Method; FEM - Federal Equivalent Method

ppb - part per billion; ppm - part per million

Teledyne API - San Diego, CA; 2B Technologies - Boulder, CO; Thermo Environmental - Franklin, MA

| Study              | Locations                                                           | Dates                |
|--------------------|---------------------------------------------------------------------|----------------------|
| Konza Mar 2017     | Konza Prairie Long Term Ecological Research site near Manhattan, KS | March 15-20, 2017    |
| Sycan Oct 2017     | Sycan Marsh Preserve in central Oregon                              | October 11, 2017     |
| Konza Nov 2017     | Konza Prairie Long Term Ecological Research site near Manhattan, KS | November 10, 2017    |
| Tallgrass Nov 2017 | Tall Grass Prairie National Preserve near Strong City, KS           | November 13-15, 2017 |
| Missoula Lab 2018  | Burn chamber at USFS Fire Sciences Laboratory in Missoula, MT       | April 16-24, 2018    |
| Missoula Lab 2019  | Burn chamber at USFS Fire Sciences Laboratory in Missoula, MT       | April 15-26, 2019    |

Konza Prairie March 2017

| datetime        | O3 NO-CL | O3 SL-UV | O3 UV-C-H | O3 UV-C | NO2-C | CO   |
|-----------------|----------|----------|-----------|---------|-------|------|
| 3/15/2017 12:40 | 1.9      | 31.7     |           | 39      | 1.1   | 0.51 |
| 3/15/2017 12:41 | 1.9      | 30.3     |           | 38.7    | 1.1   | 0.49 |
| 3/15/2017 12:42 | 1.9      | 32.5     |           | 39.7    | 1     | 0.5  |
| 3/15/2017 12:43 | 1.9      | 32.6     |           | 39.5    | 0.9   | 0.5  |
| 3/15/2017 12:44 | 1.9      |          |           | 39.4    | 0.9   | 0.5  |
| 3/15/2017 12:45 | 1.9      | 32.7     |           | 39.5    | 0.8   | 0.51 |
| 3/15/2017 12:46 | 1.9      | 33.1     |           | 39.3    | 0.7   | 0.51 |
| 3/15/2017 12:47 | 1.9      | 31.7     |           | 38.7    | 0.7   | 0.51 |
| 3/15/2017 12:48 | 1.9      | 30.3     |           | 37.7    | 0.8   | 0.5  |
| 3/15/2017 12:49 | 1.8      | 30.6     |           | 37.1    | 0.8   | 0.5  |
| 3/15/2017 12:50 | 1.8      | 31.3     |           | 41      | 0.7   | 0.51 |
| 3/15/2017 12:51 | 2.3      | 25.2     |           | 34      | 0.8   | 0.5  |
| 3/15/2017 12:52 | 7.1      |          |           | 32.1    | 0.8   | 0.5  |
| 3/15/2017 12:53 | 12       | 22.2     |           | 30.5    | 0.8   | 0.52 |
| 3/15/2017 12:54 | 17.8     | 23.6     |           | 31.8    | 0.7   | 0.5  |
| 3/15/2017 12:55 | 18.8     | 18.2     |           | 25.8    | 0.7   | 0.51 |
| 3/15/2017 12:56 | 16.9     | 14.3     |           | 21.9    | 0.7   | 0.5  |
| 3/15/2017 12:57 | 14.8     | 17.9     |           | 25.6    | 0.7   | 0.52 |
| 3/15/2017 12:58 | 13.4     | 15.7     |           | 23.1    | 0.6   | 0.51 |
| 3/15/2017 12:59 | 13.5     | 14.8     |           | 24.8    | 0.7   | 0.51 |
| 3/15/2017 13:00 | 12.9     | 14.5     |           | 20.2    | 0.8   | 0.52 |
| 3/15/2017 13:01 | 11.6     | 10.8     |           | 18      | 0.8   | 0.49 |
| 3/15/2017 13:02 | 10.8     | 12.8     |           | 21.1    | 0.7   | 0.52 |
| 3/15/2017 13:03 | 9.9      | 12.4     |           | 20.9    | 0.7   | 0.51 |
| 3/15/2017 13:04 | 9.8      | 10       |           | 16.6    | 0.8   | 0.51 |
| 3/15/2017 13:05 | 9.7      | 14.5     |           | 24.6    | 0.8   | 0.51 |
| 3/15/2017 13:06 | 9.6      | 10.3     |           | 16.9    | 0.9   | 0.53 |
| 3/15/2017 13:07 | 9.8      | 12.3     |           | 21.7    | 1.6   | 0.5  |
| 3/15/2017 13:08 | 12.2     | 20.7     |           | 28.2    | 0.9   | 0.53 |
| 3/15/2017 13:09 | 13.6     | 13.6     |           | 21.3    | 4.1   | 1.28 |
| 3/15/2017 13:10 | 14       | 13.3     |           | 20.9    | 2.9   | 1.33 |
| 3/15/2017 13:11 | 12.4     | 15       |           | 22.1    | 1.5   | 0.62 |
| 3/15/2017 13:12 | 11.5     | 11.2     |           | 18.7    | 13    | 1.66 |
| 3/15/2017 13:13 | 9.2      | 4.6      |           | 12.9    | 1.4   | 0.9  |
| 3/15/2017 13:14 | 7.5      | 9        |           | 16.6    | 1     | 0.54 |
| 3/15/2017 13:15 | 6.4      | 11.4     |           | 18.8    | 1     | 0.54 |
| 3/15/2017 13:16 | 10.2     | 17.6     |           | 26      | 0.9   | 0.54 |
| 3/15/2017 13:17 | 13.2     | 17.9     |           | 25.7    | 0.8   | 0.54 |
| 3/15/2017 13:18 | 16.4     | 19.9     |           | 28      | 2.3   | 2.06 |
| 3/15/2017 13:19 | 15.6     | 12.7     |           | 23.3    | 3.4   | 3.67 |
| 3/15/2017 13:20 | 17.4     | 25.8     |           | 36      | 2.1   | 2.32 |
| 3/15/2017 13:21 | 19.9     | 23.5     |           | 31.5    | 2.7   | 3.68 |

|                 |      |      |       |       |       |
|-----------------|------|------|-------|-------|-------|
| 3/15/2017 13:22 | 19.9 |      | 19.5  | 2.5   | 3.18  |
| 3/15/2017 13:23 | 15.9 | 12   | 22.4  | 2.8   | 6.96  |
| 3/15/2017 13:24 | 9.1  | 4.4  | 21.9  | 2.8   | 8.74  |
| 3/15/2017 13:25 | 5.4  | 1.2  | 16    | 0.7   | 0.68  |
| 3/15/2017 13:26 | 2.6  | 1.4  | 14.3  | 1     | 0.65  |
| 3/15/2017 13:27 | 3    | 8.4  | 15.8  | 2.8   | 3.69  |
| 3/15/2017 13:28 | 3.9  | 5    | 13.9  | 2.8   | 3.98  |
| 3/15/2017 13:29 | 4.6  | 3.5  | 13    | 6.9   | 13.61 |
| 3/15/2017 13:30 | 3.1  | 3.2  | 12.7  | 9.8   | 9.94  |
| 3/15/2017 13:31 | 3.4  | 7.1  | 13.5  | 1.7   | 5.38  |
| 3/15/2017 13:32 | 4.5  | 6.5  | 15.3  | 1.7   | 5.55  |
| 3/15/2017 13:33 | 5.3  | 5.2  | 15    | 10.3  | 18.25 |
| 3/15/2017 13:34 | 4.3  | 4.7  | 28.5  | 170.5 | 13.41 |
| 3/15/2017 13:35 | 2.4  | 21.7 | 125.7 | 461.7 | 19.43 |
| 3/15/2017 13:36 | 0.9  | 18.3 | 136.4 | 321.6 | 19.65 |
| 3/15/2017 13:37 | 0.4  | 23.5 | 148.1 | 353.1 | 14.2  |
| 3/15/2017 13:38 | 0.3  | 33   | 198.7 | 366.5 | 18.03 |
| 3/15/2017 13:39 | 0.3  | 30.6 | 197.4 | 306.6 | 17.99 |
| 3/15/2017 13:40 | 0.3  | 19   | 155.9 | 68.2  | 14.88 |
| 3/15/2017 13:41 | 0.3  | 14.6 | 129.7 | 11.6  | 15.75 |
| 3/15/2017 13:42 | 0.4  | 11.9 | 110.8 | 209.1 | 11.98 |
| 3/15/2017 13:43 | 0.4  | 16.7 | 137.3 | 158.9 | 14.19 |
| 3/15/2017 13:44 | 0.4  | 11   | 110.7 | 159.1 | 9.95  |
| 3/15/2017 13:45 | 0.4  | 13.5 | 125.5 | 142   | 11.02 |
| 3/15/2017 13:46 | 0.4  | 8.1  | 89.4  | 70    | 3.85  |
| 3/15/2017 13:47 | 0.4  | 4.9  | 66.4  | 46.2  | 3.52  |
| 3/15/2017 13:48 | 0.5  | 3.3  | 53.8  | 32.9  | 2.9   |
| 3/15/2017 13:49 | 0.7  | 3.3  | 43.5  | 55.1  | 2.08  |
| 3/15/2017 13:50 | 0.9  | 4    | 50.2  | 47.2  | 3.5   |
| 3/15/2017 13:51 | 0.8  | 4    | 50    | 74.1  | 3.11  |
| 3/15/2017 13:52 | 0.7  | 5.1  | 66    | 37.5  | 8.21  |
| 3/15/2017 13:53 | 0.7  | 53.2 | 423.7 | 125.5 | 74.51 |
| 3/15/2017 13:54 | 0.7  | 60.3 | 732.1 | 59.8  | 57.18 |
| 3/15/2017 13:55 | 0.7  | 27.3 | 634   | 28    | 25.78 |
| 3/15/2017 13:56 | 0.9  | -6.9 | 259.4 | 15.2  | 9.42  |
| 3/15/2017 13:57 | 1.6  | 3    | 158.6 | 9.6   | 4.17  |
| 3/15/2017 13:58 | 2.8  | 4.2  | 108   | 7.7   | 2.41  |
| 3/15/2017 13:59 | 3.3  | 2    | 87.6  | 5.7   | 0.62  |
| 3/15/2017 14:00 | 2.7  | 0.5  | 70.9  | 6.6   | 0.5   |
| 3/15/2017 14:01 | 3.9  | 12.5 | 33.2  | 8.4   | 0.71  |
| 3/15/2017 14:02 | 6.7  | 15   | 32.5  | 7.1   | 0.51  |
| 3/15/2017 14:03 | 10   | 11.4 | 31.6  | 3.7   | 0.47  |
| 3/15/2017 14:04 | 12   | 20.3 | 37.6  | 3.2   | 0.45  |
| 3/15/2017 14:05 | 15.3 | 24.6 | 36.4  | 2.5   | 0.42  |

|                 |      |      |      |     |      |
|-----------------|------|------|------|-----|------|
| 3/15/2017 14:06 | 17.8 | 21.4 | 37.8 | 2.2 | 0.43 |
| 3/15/2017 14:07 | 19.2 | 16.3 | 25.1 | 2.2 | 0.41 |
| 3/15/2017 14:08 | 14.6 | 6.9  | 18.2 | 2.4 | 0.4  |
| 3/15/2017 14:09 | 10.5 | 7.8  | 18.7 | 2.2 | 0.4  |
| 3/15/2017 14:10 | 6.5  | 6.2  | 18   | 2.3 | 0.41 |
| 3/15/2017 14:11 | 7    | 11.8 | 23.3 | 2.3 | 0.44 |
| 3/15/2017 14:12 | 7.6  | 7    | 18.3 | 3.2 | 3.27 |
| 3/15/2017 14:13 | 7.3  | 4.4  | 18.3 | 4   | 4.85 |
| 3/15/2017 14:14 | 6.5  | 7.9  | 20.7 | 4.2 | 5.8  |
| 3/15/2017 14:15 | 5.4  | 7    | 19.7 | 2.3 | 1.68 |
| 3/15/2017 14:16 | 5.6  | 5.4  | 18.4 | 2.3 | 1.17 |
| 3/15/2017 14:17 | 6.6  | 12.7 | 24.5 | 1.8 | 0.62 |
| 3/15/2017 14:18 | 9    | 13.3 | 23.9 | 1.5 | 0.43 |
| 3/15/2017 14:19 | 10.8 | 11.7 | 24.2 | 1.5 | 0.42 |
| 3/15/2017 14:20 | 11.9 | 14.7 | 24.6 | 1.4 | 0.41 |
| 3/15/2017 14:21 | 11.1 | 10.6 | 22.2 | 1.4 | 0.42 |
| 3/15/2017 14:22 | 11.7 | 15.1 | 26.5 | 1.4 | 0.41 |
| 3/15/2017 14:23 | 12.6 | 18.4 | 29.5 | 1.3 | 0.41 |
| 3/15/2017 14:24 | 15.4 | 20.2 | 33.1 | 1.2 | 0.42 |
| 3/15/2017 14:25 | 17.5 | 21   | 31.8 | 1.2 | 0.4  |
| 3/15/2017 14:26 | 18.9 | 22.7 | 33.2 | 1.2 | 0.42 |
| 3/15/2017 14:27 | 19   | 19.7 | 30.2 | 1.1 | 0.41 |
| 3/15/2017 14:28 | 19.3 | 22.4 | 34   | 1.1 | 0.39 |
| 3/15/2017 14:29 | 20.8 | 26.4 | 36.1 | 1   | 0.41 |
| 3/15/2017 14:30 | 22.2 | 23.3 | 34.6 | 0.9 | 0.39 |
| 3/15/2017 14:31 | 20.3 | 12.4 | 22.5 | 0.9 | 0.39 |
| 3/15/2017 14:32 | 15.1 | 11.1 | 22.1 | 0.9 | 0.39 |
| 3/15/2017 14:33 | 10.5 | 10.7 | 22   | 0.9 | 0.39 |
| 3/15/2017 14:34 | 9.5  | 13.7 | 25.3 | 0.9 | 0.38 |
| 3/15/2017 14:35 | 14.5 | 29.2 | 38.5 | 0.7 | 0.39 |
| 3/15/2017 14:36 | 20.5 | 28.6 | 39   | 0.7 | 0.37 |
| 3/15/2017 14:37 | 25.8 | 28.5 | 39   | 0.6 | 0.38 |
| 3/15/2017 14:38 | 27.2 | 29   | 38.7 | 0.6 | 0.38 |
| 3/15/2017 14:39 | 25.1 | 18.7 | 29.2 | 0.6 | 0.36 |
| 3/15/2017 14:40 | 22.3 | 21.1 | 31.5 | 0.7 | 0.37 |
| 3/15/2017 14:41 | 18.5 | 16.6 | 25.7 | 0.6 | 0.37 |
| 3/15/2017 14:42 | 15.6 | 12.5 | 22.8 | 0.6 | 0.36 |
| 3/15/2017 14:43 | 13.3 | 14.5 | 25.8 | 0.7 | 0.36 |
| 3/15/2017 14:44 | 15.7 | 28   | 38.1 | 0.6 | 0.37 |
| 3/15/2017 14:45 | 21.1 | 29.4 | 39.3 | 0.6 | 0.36 |
| 3/15/2017 14:46 | 26.5 | 29.1 | 39.6 | 0.6 | 0.36 |
| 3/15/2017 14:47 | 28.1 | 29.8 | 39   | 0.5 | 0.37 |
| 3/15/2017 14:48 | 28.4 | 30   | 40.5 | 0.5 | 0.36 |
| 3/15/2017 14:49 | 29.1 | 31.7 | 41.1 | 0.5 | 0.36 |



|                 |      |      |      |      |      |
|-----------------|------|------|------|------|------|
| 3/15/2017 14:50 | 29.9 | 31.9 | 42.5 | 0.5  | 0.36 |
| 3/15/2017 14:51 | 30.2 | 28   | 37.5 | 0.5  | 0.35 |
| 3/15/2017 14:52 | 26.4 | 16.5 | 26.1 | 0.5  | 0.34 |
| 3/15/2017 14:53 | 19.1 | 8.8  | 19.2 | 0.5  | 0.34 |
| 3/15/2017 14:54 | 11.6 | 8.3  | 19.4 | 0.7  | 0.35 |
| 3/15/2017 14:55 | 11   | 22.2 | 32.2 | 0.7  | 0.34 |
| 3/15/2017 14:56 | 15   | 21.8 | 30.2 | 0.6  | 0.35 |
| 3/15/2017 14:57 | 18.8 | 20.2 | 29.5 | 0.6  | 0.35 |
| 3/15/2017 14:58 | 18.2 | 13.5 | 22.5 | 0.5  | 0.34 |
| 3/15/2017 14:59 | 13.5 | 7    | 16.3 | 0.5  | 0.34 |
| 3/15/2017 15:00 | 8.6  | 5    | 14.4 | 0.5  | 0.36 |
| 3/15/2017 15:01 | 4.9  | 4.1  | 14.1 | 0.6  | 0.35 |
| 3/15/2017 15:02 | 3.3  | 3.6  | 13.5 | 0.5  | 0.34 |
| 3/15/2017 15:03 | 2.7  | 3.2  | 13.2 | 0.7  | 0.36 |
| 3/15/2017 15:04 | 3.8  | 10.5 | 21.1 | 1    | 0.35 |
| 3/15/2017 15:05 | 8.3  | 19.3 | 29.7 | 1.1  | 0.34 |
| 3/15/2017 15:06 | 13.7 | 20.5 | 31.2 | 1    | 0.36 |
| 3/15/2017 15:07 | 18.7 | 21.1 | 31.1 | 0.7  | 0.35 |
| 3/15/2017 15:08 | 17   | 11.2 | 22.8 | 1    | 0.34 |
| 3/15/2017 15:09 | 15.2 | 15.2 | 26.9 | 0.8  | 0.35 |
| 3/15/2017 15:10 | 13.2 | 14.2 | 24.2 | 3.6  | 0.41 |
| 3/15/2017 15:11 | 11.5 | 5.6  | 16.9 | 0.8  | 0.36 |
| 3/15/2017 15:12 | 11.8 | 19.3 | 31.2 | 0.7  | 0.35 |
| 3/15/2017 15:13 | 13.8 | 19.8 | 29.9 | 0.6  | 0.36 |
| 3/15/2017 15:14 | 15.2 | 10.1 | 21.7 | 0.7  | 0.35 |
| 3/15/2017 15:15 | 15.7 | 18.4 | 29.5 | 0.7  | 0.37 |
| 3/15/2017 15:16 | 14.8 | 20.3 | 31   | 0.6  | 0.37 |
| 3/15/2017 15:17 | 17   | 19.2 | 29.6 | 0.7  | 0.39 |
| 3/15/2017 15:18 | 17.8 | 17.6 | 28.3 | 0.6  | 0.36 |
| 3/15/2017 15:19 | 17.4 | 20.7 | 31.6 | 0.7  | 0.38 |
| 3/15/2017 15:20 | 18.7 | 24.1 | 35.4 | 0.6  | 0.38 |
| 3/15/2017 15:21 | 22.1 | 27.4 | 38.7 | 0.6  | 0.34 |
| 3/15/2017 15:22 | 22.6 | 16.8 | 28.8 | 0.6  | 0.36 |
| 3/15/2017 15:23 | 19.8 | 12.6 | 24.3 | 0.6  | 0.37 |
| 3/15/2017 15:24 | 14   | 9.6  | 21.7 | 2.4  | 0.38 |
| 3/15/2017 15:25 | 9.2  | 5.3  | 18.2 | 20.4 | 0.62 |
| 3/15/2017 15:26 | 6.5  | 6.9  | 19.9 | 4.3  | 0.6  |
| 3/15/2017 15:27 | 5.4  | 7.7  | 19.7 | 0.8  | 0.35 |
| 3/15/2017 15:28 | 6    | 7.8  | 19.6 | 0.7  | 0.35 |
| 3/15/2017 15:29 | 6    | 6.3  | 17.3 | 0.8  | 0.36 |
| 3/15/2017 15:30 | 6.1  | 8    | 19   | 0.7  | 0.37 |
| 3/15/2017 15:31 | 6.4  | 10.7 | 20.6 | 0.7  | 0.35 |
| 3/15/2017 15:32 | 7.1  | 7.4  | 17.9 | 0.7  | 0.35 |
| 3/15/2017 15:33 | 7    | 7.6  | 18.1 | 0.7  | 0.36 |

|                 |      |      |       |       |       |
|-----------------|------|------|-------|-------|-------|
| 3/15/2017 15:34 | 6.7  | 9.3  | 19.3  | 0.7   | 0.33  |
| 3/15/2017 15:35 | 8.1  | 12.3 | 23.2  | 0.7   | 0.33  |
| 3/15/2017 15:36 | 9.8  | 11.8 | 22    | 0.7   | 0.33  |
| 3/15/2017 15:37 | 10.1 | 9.2  | 19.7  | 0.6   | 0.33  |
| 3/15/2017 15:38 | 9.1  | 9.3  | 20.1  | 0.7   | 0.32  |
| 3/15/2017 15:39 | 8    | 8.8  | 19.2  | 0.7   | 0.33  |
| 3/15/2017 15:40 | 8    | 10.2 | 20.3  | 0.9   | 0.38  |
| 3/15/2017 15:41 | 8.1  | 9.5  | 20    | 0.7   | 0.32  |
| 3/15/2017 15:42 | 8.1  | 8.7  | 19.9  | 0.7   | 0.34  |
| 3/15/2017 15:43 | 8    | 8.1  | 18.7  | 0.7   | 0.32  |
| 3/15/2017 15:44 | 6.9  | 8.2  | 18.5  | 0.8   | 0.32  |
| 3/15/2017 15:45 | 7.3  | 9.6  | 20.1  | 1.2   | 0.35  |
| 3/15/2017 15:46 | 9.7  | 19.6 | 28.6  | 1.1   | 0.34  |
| 3/15/2017 15:47 | 13.7 | 23.6 | 51.3  | 821.3 | 4.73  |
| 3/15/2017 15:48 | 11.7 | 64   | 377.2 | 437.1 | 93.39 |
| 3/15/2017 15:49 | 6.7  | 35.8 | 400.1 | 164.1 | 37.68 |
| 3/15/2017 15:50 | 1.2  | 22.3 | 250.3 | 115   | 10.65 |
| 3/15/2017 15:51 | 0.3  | 41.7 | 321.1 | 340.3 | 23.66 |
| 3/15/2017 15:52 | 0.3  | 38.7 | 420.1 | 221.4 | 19.98 |
| 3/15/2017 15:53 | 0.1  | 22.6 | 309.1 | 138.4 | 15.13 |
| 3/15/2017 15:54 | 0.2  | 16.6 | 205.5 | 107.6 | 5.69  |
| 3/15/2017 15:55 | 0.3  | 14   | 177.8 | 35.7  | 5.33  |
| 3/15/2017 15:56 | 0.4  | 19.2 | 171.4 | 246   | 13.04 |
| 3/15/2017 15:57 | 0.3  | 38.4 | 333.7 | 197.1 | 30.46 |
| 3/15/2017 15:58 | 0.2  | 38.3 | 383.2 | 159.9 | 26    |
| 3/15/2017 15:59 | 0.2  | 39.1 | 410.7 | 162   | 23.68 |
| 3/15/2017 16:00 | 0.2  | 29.8 | 374   | 125.1 | 17.39 |
| 3/15/2017 16:01 | 0.2  | 24.6 | 303.7 | 131.8 | 13.04 |
| 3/15/2017 16:02 | 0.2  | 25.8 | 311.8 | 122.7 | 12.32 |
| 3/15/2017 16:03 | 0.2  | 22.1 | 257.4 | 94.9  | 7.35  |
| 3/15/2017 16:04 | 0.3  | 22.9 | 278.4 | 135.4 | 10.17 |
| 3/15/2017 16:05 | 0.3  | 16.2 | 236.8 | 67    | 8.6   |
| 3/15/2017 16:06 | 0.2  | 16.9 | 226.3 | 122.4 | 13.85 |
| 3/15/2017 16:07 | 0.2  | 19.9 | 256.8 | 169.7 | 14.23 |
| 3/15/2017 16:08 | 0.2  | 17.6 | 225.3 | 95.5  | 9.6   |
| 3/15/2017 16:09 | 0.2  | 15.2 | 205.3 | 95.3  | 8.12  |
| 3/15/2017 16:10 | 0.2  | 11.4 | 159.3 | 70.7  | 6.52  |
| 3/15/2017 16:11 | 0.3  | 8.9  | 174.3 | 19.3  | 5.89  |
| 3/15/2017 16:12 | 0.3  | 10.9 | 160.6 | 49.4  | 7.48  |
| 3/15/2017 16:13 | 0.3  | 19.4 | 249.7 | 48    | 15.55 |
| 3/15/2017 16:14 | 0.4  | 3.8  | 209.9 | 19.9  | 11.26 |
| 3/15/2017 16:15 | 0.5  | 0    | 124.3 | 8.8   | 5.63  |
| 3/15/2017 16:16 | 0.9  | 1.3  | 69.7  | 6.7   | 2.62  |
| 3/15/2017 16:17 | 2.3  | 8.3  | 46.5  | 5.6   | 1.33  |

|                 |      |      |       |      |      |
|-----------------|------|------|-------|------|------|
| 3/15/2017 16:18 | 4    | 9.4  | 52.5  | 7.2  | 1.52 |
| 3/15/2017 16:19 | 5.8  | 12.7 | 66.8  | 7.8  | 2.16 |
| 3/15/2017 16:20 | 8.1  | 17.6 | 45.6  | 4.2  | 1.22 |
| 3/15/2017 16:21 | 10.8 | 19.4 | 46.1  | 4.1  | 1.12 |
| 3/15/2017 16:22 | 13.4 | 20.5 | 48    | 3.3  | 0.77 |
| 3/15/2017 16:23 | 15.1 | 23.1 | 47.9  | 3    | 0.73 |
| 3/15/2017 16:24 | 15.8 | 18.7 | 44.2  | 3    | 0.71 |
| 3/15/2017 16:25 | 15.8 | 19.7 | 43.2  | 2.8  | 0.57 |
| 3/15/2017 16:26 | 15.2 | 18.1 | 46.7  | 11.5 | 0.77 |
| 3/15/2017 16:27 | 13.1 | 10.7 | 39.8  | 13.9 | 1.3  |
| 3/15/2017 16:28 | 9.8  | 4.6  | 32    | 2.9  | 1.04 |
| 3/15/2017 16:29 | 5.8  | 6.4  | 35.6  | 2.7  | 0.78 |
| 3/15/2017 16:30 | 4.2  | 7.5  | 41.1  | 6.4  | 1.16 |
| 3/15/2017 16:31 | 4.5  | 8.8  | 37.3  | 2.9  | 0.97 |
| 3/15/2017 16:32 | 6.1  | 11.6 | 35.5  | 2.3  | 0.47 |
| 3/15/2017 16:33 | 8.1  | 14   | 36.4  | 2.4  | 0.52 |
| 3/15/2017 16:34 | 9.6  | 15.2 | 41.2  | 2.9  | 0.8  |
| 3/15/2017 16:35 | 11.8 | 18.7 | 45.4  | 2.9  | 0.57 |
| 3/15/2017 16:36 | 12.3 | 14.6 | 42.2  | 2.8  | 0.83 |
| 3/15/2017 16:37 | 11.5 | 6.2  | 34    | 4    | 0.59 |
| 3/15/2017 16:38 | 7.5  | 4.1  | 46.1  | 22.2 | 4.46 |
| 3/15/2017 16:39 | 3.8  | 5.5  | 70.2  | 16.7 | 6.61 |
| 3/15/2017 16:40 | 1.5  | 3.6  | 65.9  | 8.6  | 2.02 |
| 3/15/2017 16:41 | 1    | 3.4  | 60.2  | 28   | 6.21 |
| 3/15/2017 16:42 | 0.8  | 3.6  | 69.8  | 15.6 | 5.3  |
| 3/15/2017 16:43 | 0.8  | 5.9  | 83.7  | 19.7 | 7.48 |
| 3/15/2017 16:44 | 0.7  | 9.2  | 118.4 | 24.6 | 8.38 |
| 3/15/2017 16:45 | 0.9  | 6.6  | 107.5 | 16.4 | 8.39 |
| 3/15/2017 16:46 | 1    | 5.8  | 92.9  | 13.8 | 4.8  |
| 3/15/2017 16:47 | 1.1  | 4.4  | 87.7  | 7.1  | 5.66 |
| 3/15/2017 16:48 | 1.1  | 3.8  | 71.2  | 7.8  | 2.38 |
| 3/15/2017 16:49 | 1.5  | 4.9  | 66.5  | 3.7  | 3.23 |
| 3/15/2017 16:50 | 1.9  | 3.4  | 53.8  | 3    | 1.11 |
| 3/15/2017 16:51 | 2.2  | 3.5  | 52    | 3.1  | 1.03 |
| 3/15/2017 16:52 | 2.2  | 3    | 42.1  | 2.1  | 0.57 |
| 3/15/2017 16:53 | 2.2  | 3.6  | 37.9  | 1.8  | 0.55 |
| 3/15/2017 16:54 | 2.1  | 1.2  | 33.4  | 1.9  | 0.41 |
| 3/15/2017 16:55 | 2    | 2.8  | 31.4  | 1.5  | 0.33 |
| 3/15/2017 16:56 | 1.7  | 1.2  | 29.1  | 1.6  | 0.34 |
| 3/15/2017 16:57 | 1.4  | 1    | 28.1  | 6.7  | 2.63 |
| 3/15/2017 16:58 | 1.2  | 2.1  | 27.5  | 4.8  | 4.36 |
| 3/15/2017 16:59 | 2.5  | 9.8  | 27.1  | 3.5  | 4.58 |

|                 |     |      |       |       |      |
|-----------------|-----|------|-------|-------|------|
| 3/16/2017 10:30 | 1.1 | 0.9  | 10.2  | 4.3   | 1.71 |
| 3/16/2017 10:31 | 0.9 | 0.5  | 10.6  | 1.3   | 0.71 |
| 3/16/2017 10:32 | 0.8 | 1    | 10.5  | 1.4   | 0.7  |
| 3/16/2017 10:33 | 2   | 7.4  | 19    | 1     | 0.8  |
| 3/16/2017 10:34 | 6   | 15.1 | 20.9  | 0.9   | 0.83 |
| 3/16/2017 10:35 | 8   | 5    | 12.9  | 0.9   | 0.9  |
| 3/16/2017 10:36 | 7.2 | 2    | 10.3  | 0.9   | 0.91 |
| 3/16/2017 10:37 | 3.8 | 3.7  | 12.6  | 1.3   | 0.9  |
| 3/16/2017 10:38 | 2.4 | 3.2  | 12.9  | 1     | 0.79 |
| 3/16/2017 10:39 | 3.6 | 7.3  | 15.2  | 1.1   | 0.6  |
| 3/16/2017 10:40 | 5.2 | 8.9  | 16.4  | 0.6   | 0.58 |
| 3/16/2017 10:41 | 7.4 | 10.5 | 17.6  | 0.9   | 0.64 |
| 3/16/2017 10:42 | 8.4 | 7.2  | 15    | 1     | 0.7  |
| 3/16/2017 10:43 | 9   | 12.5 | 18.3  | 0.8   | 0.6  |
| 3/16/2017 10:44 | 8.5 | 8.3  | 16.5  | 0.7   | 0.57 |
| 3/16/2017 10:45 | 8.3 | 7.7  | 14.5  | 0.7   | 0.57 |
| 3/16/2017 10:46 | 6   | 2.2  | 9.7   | 0.7   | 0.61 |
| 3/16/2017 10:47 | 3.6 | 0.8  | 9.7   | 0.7   | 0.6  |
| 3/16/2017 10:48 | 1.7 | 3.5  | 10.4  | 0.7   | 0.6  |
| 3/16/2017 10:49 | 1.8 | 4.8  | 11.6  | 0.7   | 0.56 |
| 3/16/2017 10:50 | 3.2 | 10.5 | 16.3  | 0.7   | 0.56 |
| 3/16/2017 10:51 | 4.2 | 6.2  | 12.1  | 0.7   | 0.55 |
| 3/16/2017 10:52 | 4   | 2    | 10.6  | 0.6   | 0.6  |
| 3/16/2017 10:53 | 4.8 | 11.7 | 16.5  | 0.6   | 0.52 |
| 3/16/2017 10:54 | 4.3 | 4.2  | 11.9  | 0.6   | 0.51 |
| 3/16/2017 10:55 | 4.6 | 3.8  | 12    | 0.6   | 0.52 |
| 3/16/2017 10:56 | 3.6 | 6.7  | 13.7  | 0.8   | 0.51 |
| 3/16/2017 10:57 | 3.2 | 1.6  | 9.9   | 1     | 0.61 |
| 3/16/2017 10:58 | 2.6 | 1    | 9.1   | 1.2   | 0.53 |
| 3/16/2017 10:59 | 1.4 | 1.3  | 2.8   | 1.5   | 0.48 |
| 3/16/2017 11:00 | 2.2 | 9.4  | 17.1  | 1.7   | 0.5  |
| 3/16/2017 11:01 | 5.1 | 11   | 17.4  | 1.8   | 0.48 |
| 3/16/2017 11:02 | 7.5 | 9.2  | 14.6  | 1.9   | 0.49 |
| 3/16/2017 11:03 | 6.6 | 2.4  | 9.8   | 2     | 0.5  |
| 3/16/2017 11:04 | 3.7 | 1.4  | 9.5   | 2     | 0.54 |
| 3/16/2017 11:05 | 1.3 | 0.9  | 10.5  | 23    | 0.57 |
| 3/16/2017 11:06 | 0.7 | 9.8  | 49.6  | 405.7 | 8.44 |
| 3/16/2017 11:07 | 0.5 | 31.8 | 195.8 | 58.9  | 13.9 |
| 3/16/2017 11:08 | 0.3 | 15.6 | 139.6 | 8.6   | 3.17 |
| 3/16/2017 11:09 | 0.4 | 3.2  | 52.3  | 5     | 1.36 |
| 3/16/2017 11:10 | 1.5 | 5.8  | 27.2  | 3.9   | 1.2  |
| 3/16/2017 11:11 | 3.8 | 11   | 29.7  | 70.8  | 1.36 |
| 3/16/2017 11:12 | 4   | 14.6 | 79.1  | 208.2 | 7.43 |
| 3/16/2017 11:13 | 3.1 | 24.8 | 149.8 | 129.4 | 9.18 |

|                 |     |      |       |       |       |
|-----------------|-----|------|-------|-------|-------|
| 3/16/2017 11:14 | 1   | 56.6 | 304.1 | 304.3 | 12.13 |
| 3/16/2017 11:15 | 0.5 | 74.7 | 587.2 | 173.5 | 18.44 |
| 3/16/2017 11:16 | 0.3 | 72.3 | 636   | 175.2 | 24.76 |
| 3/16/2017 11:17 | 0.1 | 45.2 | 608.3 | 78.9  | 21.61 |
| 3/16/2017 11:18 | 0.1 | 26.7 | 473.2 | 55.8  | 7.67  |
| 3/16/2017 11:19 | 0.2 | 16.8 | 384.9 | 71.9  | 6.29  |
| 3/16/2017 11:20 | 0.2 | 16.3 | 331.4 | 69.4  | 6.07  |
| 3/16/2017 11:21 | 0.2 | 15.8 | 315.4 | 80    | 8.92  |
| 3/16/2017 11:22 | 0.2 | 22.7 | 332.6 | 96.5  | 7.87  |
| 3/16/2017 11:23 | 0.3 | 34.1 | 401.2 | 84.8  | 8.23  |
| 3/16/2017 11:24 | 0.3 | 32.9 | 430.3 | 130.5 | 10.39 |
| 3/16/2017 11:25 | 0.3 | 34   | 416.9 | 86.4  | 9.68  |
| 3/16/2017 11:26 | 0.2 | 19.5 | 329.8 | 68.9  | 6.39  |
| 3/16/2017 11:27 | 0.2 | 24   | 332.1 | 84.4  | 8.38  |
| 3/16/2017 11:28 | 0.2 | 18   | 287   | 45.3  | 6.53  |
| 3/16/2017 11:29 | 0.2 | 22.1 | 313.5 | 44.6  | 6.6   |
| 3/16/2017 11:30 | 0.2 | 15.2 | 282   | 37.1  | 5.98  |
| 3/16/2017 11:31 | 0.2 | 17.1 | 278.3 | 69    | 5.81  |
| 3/16/2017 11:32 | 0.2 | 19.1 | 298.7 | 120.4 | 8.89  |
| 3/16/2017 11:33 | 0.2 | 19.9 | 301.3 | 115.8 | 9.97  |
| 3/16/2017 11:34 | 0.2 | 31.3 | 346.4 | 196.8 | 8.31  |
| 3/16/2017 11:35 | 0.2 | 48.1 | 468.5 | 175.8 | 15.28 |
| 3/16/2017 11:36 | 0.1 | 47.6 | 478.5 | 139.6 | 12.93 |
| 3/16/2017 11:37 | 0.1 | 23.6 | 381.3 | 75.5  | 9.21  |
| 3/16/2017 11:38 | 0.2 | 11.4 | 285   | 60.8  | 6.35  |
| 3/16/2017 11:39 | 0.2 | 17.2 | 302.9 | 60.5  | 6.61  |
| 3/16/2017 11:40 | 0.4 | 20.2 | 322.4 | 54.4  | 9.09  |
| 3/16/2017 11:41 | 0.6 | 21.4 | 320.5 | 45.8  | 7.13  |
| 3/16/2017 11:42 | 0.5 | 11.5 | 268.8 | 46.8  | 5.92  |
| 3/16/2017 11:43 | 0.3 | 7.5  | 238.1 | 37.1  | 6.8   |
| 3/16/2017 11:44 | 0.1 | 5.7  | 215.9 | 34    | 5.57  |
| 3/16/2017 11:45 | 0.1 | 9.5  | 235   | 38.2  | 6.28  |
| 3/16/2017 11:46 | 0.1 | 5.5  | 209.8 | 44    | 6.21  |
| 3/16/2017 11:47 | 0.1 | 5.3  | 200.1 | 37.7  | 6.19  |
| 3/16/2017 11:48 | 0.1 | 6    | 205.3 | 36.7  | 5.18  |
| 3/16/2017 11:49 | 0.1 | 5    | 191.4 | 31.6  | 6.06  |
| 3/16/2017 11:50 | 0.1 | 5.2  | 199.3 | 25.8  | 5.15  |
| 3/16/2017 11:51 | 0.1 | 0.9  | 170.3 | 16.8  | 4.28  |
| 3/16/2017 11:52 | 0.2 | -0.2 | 140   | 26.5  | 4.39  |
| 3/16/2017 11:53 | 0.2 | 3.3  | 149.9 | 22.7  | 4.37  |
| 3/16/2017 11:54 | 0.2 | 1.6  | 146.4 | 19.6  | 4.06  |
| 3/16/2017 11:55 | 0.2 | 0.2  | 142.2 | 15.7  | 4.63  |
| 3/16/2017 11:56 | 0.2 | 0.8  | 132.4 | 15.2  | 3.92  |
| 3/16/2017 11:57 | 0.2 | 1.6  | 136.3 | 14.5  | 4.12  |

|                 |      |      |      |       |      |      |
|-----------------|------|------|------|-------|------|------|
| 3/16/2017 11:58 | 0.5  | 10.1 |      | 172.3 | 16   | 4.08 |
| 3/16/2017 11:59 | 0.9  | 2.9  |      | 157.2 | 12.8 | 3.87 |
| 3/16/2017 12:00 | 1.3  | 6.4  |      | 149.3 | 13.4 | 3.81 |
| 3/16/2017 12:01 | 1.4  | 10   |      | 164.1 | 14.2 | 3.67 |
| 3/16/2017 12:02 | 1.5  | 6.1  |      | 163.3 | 14.7 | 4.07 |
| 3/16/2017 12:03 | 1.5  | 4.1  |      | 133   | 14   | 3.9  |
| 3/16/2017 12:04 | 1.3  | 5.2  |      | 141.3 | 18.5 | 4.36 |
| 3/16/2017 12:05 | 1    | -1.7 |      | 96.4  | 3.7  | 1.94 |
| 3/16/2017 12:06 | 0.8  | -1.9 |      | 49.5  | 2.8  | 0.52 |
| 3/16/2017 12:07 | 0.8  | 0.5  |      | 37.2  | 2.4  | 0.36 |
| 3/16/2017 12:08 | 1    | 1.7  | 7.9  | 30.1  | 2.2  | 0.37 |
| 3/16/2017 12:09 | 1.1  | 1.5  | 4    | 28.7  | 2.1  | 0.36 |
| 3/16/2017 12:10 | 1.2  | 2.4  | -1.4 | 27.3  | 2    | 0.38 |
| 3/16/2017 12:11 | 1.3  | 2.3  | -5   | 27.1  | 1.9  | 0.38 |
| 3/16/2017 12:12 | 1.6  | 3.8  | -2.2 | 23.8  | 1.9  | 0.37 |
| 3/16/2017 12:13 | 2    | 4.1  | 1    | 24.4  | 1.9  | 0.41 |
| 3/16/2017 12:14 | 2.4  | 5.6  | 4.9  | 23.1  | 1.8  | 0.38 |
| 3/16/2017 12:15 | 2.7  | 4.5  | 4.8  | 22.5  | 1.8  | 0.38 |
| 3/16/2017 12:16 | 2.6  | 4.5  | 0.6  | 23.2  | 1.7  | 0.37 |
| 3/16/2017 12:17 | 2.6  | 5.6  | 0.1  | 23.1  | 1.7  | 0.37 |
| 3/16/2017 12:18 | 2.5  | 4.1  | 1.8  | 22.6  | 1.8  | 0.43 |
| 3/16/2017 12:19 | 2.4  | 4.2  | 4.6  | 23.6  | 1.9  | 0.51 |
| 3/16/2017 12:20 | 2.4  | 4.6  | 1.3  | 23.4  | 1.8  | 0.56 |
| 3/16/2017 12:21 | 2.6  | 6.2  | -4.4 | 23    | 1.7  | 0.38 |
| 3/16/2017 12:22 | 3.1  | 7.4  | 4.3  | 22.6  | 1.7  | 0.38 |
| 3/16/2017 12:23 | 3.4  | 6.2  | 6.7  | 22.5  | 1.8  | 0.36 |
| 3/16/2017 12:24 | 3.5  | 5.2  | 6.7  | 21.7  | 1.8  | 0.62 |
| 3/16/2017 12:25 | 3.3  | 4.4  | 5.3  | 22.7  | 1.8  | 0.57 |
| 3/16/2017 12:26 | 3.2  | 5.5  | 4.8  | 22.2  | 1.8  | 0.44 |
| 3/16/2017 12:27 | 3    | 4.3  | 7    | 21.1  | 2.5  | 2.4  |
| 3/16/2017 12:28 | 2.8  | 3.1  | 3.9  | 22.4  | 1.9  | 1.52 |
| 3/16/2017 12:29 | 2.5  | 2.9  | 2.7  | 21.8  | 2    | 1.82 |
| 3/16/2017 12:30 | 2.4  | 3.8  | 0.4  | 21.8  | 2    | 2.15 |
| 3/16/2017 12:31 | 2.6  | 4.8  | 1.9  | 23.7  | 2    | 1.32 |
| 3/16/2017 12:32 | 2.5  | 3.5  | 1.7  | 21.5  | 2.2  | 0.81 |
| 3/16/2017 12:33 | 2.4  | 2.7  | 3.7  | 19.6  | 2.1  | 0.45 |
| 3/16/2017 12:34 | 2.2  | 3.1  | 5    | 18.8  | 2.1  | 0.36 |
| 3/16/2017 12:35 | 2.1  | 3.3  | 4.4  | 19    | 2.2  | 0.44 |
| 3/16/2017 12:36 | 2    | 2.1  | 3.3  | 20.6  | 3.3  | 4.69 |
| 3/16/2017 12:37 | 1.9  | 2.5  | 0.9  | 19.8  | 2.6  | 2.29 |
| 3/16/2017 12:38 | 1.9  | 3.9  | 3.5  | 21.7  | 2.7  | 2.07 |
| 3/16/2017 12:39 | 4.6  | 22.8 | 3.6  | 34.5  | 2.1  | 0.67 |
| 3/16/2017 12:40 | 9.9  | 30.6 | 20.9 | 33.8  | 2    | 0.69 |
| 3/16/2017 12:41 | 15.6 | 31.8 | 29.1 | 35.4  | 1.9  | 0.38 |

|                 |      |      |      |       |       |       |
|-----------------|------|------|------|-------|-------|-------|
| 3/16/2017 12:42 | 19   | 31.9 | 28.3 | 35.2  | 2     | 0.33  |
| 3/16/2017 12:43 | 19.7 | 31.2 | 29   | 34.4  | 2.1   | 0.32  |
| 3/16/2017 12:44 | 19.9 | 30.5 | 29.4 | 33.2  | 2.1   | 0.33  |
| 3/16/2017 12:45 | 19.9 | 30.7 | 29.1 | 33.9  | 2.1   | 0.3   |
| 3/16/2017 12:46 | 20.2 | 31.6 | 30.3 | 34.5  | 2     | 0.34  |
| 3/16/2017 12:47 | 20.6 | 31.7 | 29.9 | 34.1  | 2.6   | 0.33  |
| 3/16/2017 12:48 | 21.1 | 32.9 | 26.9 | 34.9  | 2.6   | 0.33  |
| 3/16/2017 12:49 | 21.6 | 33.3 | 30.3 | 36.3  | 2.1   | 0.32  |
| 3/16/2017 12:50 | 22   | 33   | 31.5 | 35.6  | 1.9   | 0.31  |
| 3/16/2017 12:51 | 22.1 | 32   | 27.7 | 35.1  | 1.9   | 0.29  |
| 3/16/2017 12:52 | 22   | 32.1 | 28.5 | 34.6  | 1.9   | 0.3   |
| 3/16/2017 12:53 | 21.7 | 30.2 | 28.9 | 34.1  | 1.8   | 0.3   |
| 3/16/2017 12:54 | 21.5 | 31.2 | 29.5 | 34    | 1.9   | 0.47  |
| 3/16/2017 12:55 | 21.6 | 32.2 | 26   | 35.4  | 1.9   | 0.36  |
| 3/16/2017 12:56 | 22.1 | 32.6 | 32   | 36.2  | 1.9   | 0.31  |
| 3/16/2017 12:57 | 22.7 | 33.4 | 29.3 | 35.6  | 1.7   | 0.28  |
| 3/16/2017 12:58 | 23.1 | 32.4 | 27.6 | 35.9  | 1.7   | 0.28  |
| 3/16/2017 12:59 | 23.2 | 31.3 | 29.4 | 34.1  | 4.8   | 0.27  |
| 3/16/2017 13:00 | 18.9 | 42   | 29.4 | 257.3 | 279.9 | 6.95  |
| 3/16/2017 13:01 | 13.8 | 12.2 | 55.5 | 237.4 | 125.5 | 15.23 |
| 3/16/2017 13:02 | 9.4  | 18.8 | 77   | 137.1 | 78.7  | 8.63  |
| 3/16/2017 13:03 | 9.8  | 18.9 | 32.8 | 101.9 | 68    | 6.02  |
| 3/16/2017 13:04 | 10.8 | 17.6 | 28.3 | 105   | 87.8  | 7.36  |
| 3/16/2017 13:05 | 10.7 | 17.8 | 27.7 | 135   | 112   | 7.27  |
| 3/16/2017 13:06 | 8.9  | 13.2 | 29.1 | 192.1 | 153.3 | 14.51 |
| 3/16/2017 13:07 | 7.5  | 14.3 | 34.4 | 181.6 | 150   | 12.78 |
| 3/16/2017 13:08 | 6.4  | 13.2 | 35.2 | 170.7 | 129.9 | 12.66 |
| 3/16/2017 13:09 | 6.2  | 13.7 | 35.3 | 186.3 | 150.6 | 12.63 |
| 3/16/2017 13:10 | 6.4  | 15.9 | 33.9 | 158.4 | 101   | 11.07 |
| 3/16/2017 13:11 | 7.8  | 17.3 | 33.5 | 122.6 | 73.9  | 8.2   |
| 3/16/2017 13:12 | 9.2  | 16.3 | 29.7 | 170.6 | 112.9 | 8.26  |
| 3/16/2017 13:13 | 9.8  | 17.6 | 27.8 | 116.2 | 69.8  | 9.06  |
| 3/16/2017 13:14 | 10.5 | 20.3 | 25.7 | 82    | 43.2  | 5.03  |
| 3/16/2017 13:15 | 10.8 | 17.7 | 24.4 | 113.1 | 74.3  | 5.72  |
| 3/16/2017 13:16 | 11.1 | 17.6 | 24.8 | 109.5 | 72.6  | 7.59  |
| 3/16/2017 13:17 | 9.8  | 14.5 | 27.7 | 154.4 | 120   | 8.49  |
| 3/16/2017 13:18 | 7.9  | 12.4 | 29.9 | 187.7 | 178.6 | 14.09 |
| 3/16/2017 13:19 | 6.4  | 11.8 | 34.6 | 124.6 | 128.3 | 12.75 |
| 3/16/2017 13:20 | 5.5  | 14.6 | 31.2 | 170.6 | 189.3 | 9.87  |
| 3/16/2017 13:21 | 4.9  | 8    | 29.6 | 192.3 | 189.1 | 17.62 |
| 3/16/2017 13:22 | 4.8  | 11.4 | 34.6 | 148.6 | 136.4 | 11.88 |
| 3/16/2017 13:23 | 5.3  | 13.8 | 31.4 | 104.6 | 77.5  | 7.79  |
| 3/16/2017 13:24 | 8    | 25   | 27.1 | 81.8  | 48.4  | 5.16  |
| 3/16/2017 13:25 | 9.2  | 32   | 27.7 | 224.4 | 151.7 | 9.19  |

|                 |      |      |       |        |       |       |
|-----------------|------|------|-------|--------|-------|-------|
| 3/16/2017 13:26 | 7.8  | 8.9  | 49.7  | 187.8  | 169.3 | 14.76 |
| 3/16/2017 13:27 | 6.4  | 12.1 | 39.1  | 121.7  | 84.6  | 9.83  |
| 3/16/2017 13:28 | 7.9  | 21.3 | 32.7  | 58     | 29.7  | 3.46  |
| 3/16/2017 13:29 | 10.3 | 17.8 | 23.3  | 97.5   | 64.8  | 5.44  |
| 3/16/2017 13:30 | 11.4 | 16.1 | 22.7  | 103.7  | 75.8  | 6.67  |
| 3/16/2017 13:31 | 10.9 | 17.3 | 23.7  | 82.7   | 83    | 5.97  |
| 3/16/2017 13:32 | 12.1 | 21.1 | 18.2  | 65.7   | 79.8  | 3.45  |
| 3/16/2017 13:33 | 12.3 | 15.6 | 24.9  | 89.8   | 72.2  | 6.49  |
| 3/16/2017 13:34 | 12.9 | 18.7 | 23.3  | 69.4   | 44.3  | 4.06  |
| 3/16/2017 13:35 | 11.6 | 16.8 | 21.7  | 83.4   | 63    | 5.91  |
| 3/16/2017 13:36 | 12.2 | 17.9 | 24.8  | 87.6   | 92.7  | 5.07  |
| 3/16/2017 13:37 | 11   | 15.8 | 25    | 83     | 75.1  | 7.37  |
| 3/16/2017 13:38 | 10.6 | 15   | 26.3  | 75.7   | 88.7  | 5.68  |
| 3/16/2017 13:39 | 10.3 | 18.4 | 22.4  | 83.7   | 69.3  | 6.29  |
| 3/16/2017 13:40 | 11.4 | 19.4 | 22.5  | 88.4   | 96.7  | 5.64  |
| 3/16/2017 13:41 | 11   | 16.2 | 24    | 121.1  | 132.1 | 7.91  |
| 3/16/2017 13:42 | 10.1 | 13.4 | 36.7  | 110.2  | 127.2 | 8.79  |
| 3/16/2017 13:43 | 9.3  | 16.3 | 21.4  | 83.7   | 83.3  | 6.75  |
| 3/16/2017 13:44 | 11.3 | 22.4 | 22.8  | 55.1   | 34.7  | 4.63  |
| 3/16/2017 13:45 | 13.3 | 19.4 | 21.4  | 71.3   | 66.7  | 3.68  |
| 3/16/2017 13:46 | 15.1 | 24.2 | 21.6  | 41.8   | 17.9  | 3.41  |
| 3/16/2017 13:47 | 16.4 | 26.4 | 21.7  | 68.5   | 46.5  | 1.52  |
| 3/16/2017 13:48 | 14.9 | 13.4 | 27.1  | 162.5  | 119.1 | 9.81  |
| 3/16/2017 13:49 | 13.2 | 15.7 | 31.8  | 98.4   | 98.6  | 7.59  |
| 3/16/2017 13:50 | 9.3  | 15.7 | 29.3  | 256.2  | 227.5 | 10.5  |
| 3/16/2017 13:51 | 7.5  | 6.5  | 34.4  | 310.8  | 243.4 | 29.04 |
| 3/16/2017 13:52 | 6.9  | 17.7 | 42.8  | 310    | 189.2 | 11.69 |
| 3/16/2017 13:53 | 5.3  | 8.1  | 45.6  | 566.7  | 342.9 | 31.87 |
| 3/16/2017 13:54 | 4.1  | 12.6 | 65.2  | 679.1  | 706.4 | 44.1  |
| 3/16/2017 13:55 | 1.8  | 7.8  | 85.7  | 1081.9 | 533   | 66.58 |
| 3/16/2017 13:56 | 1.3  | 16.1 | 111.8 | 1094   | 251.4 | 56.17 |
| 3/16/2017 13:57 | 1.7  | -2.4 | 111.1 | 456.4  | 130.9 | 49.78 |
| 3/16/2017 13:58 | 2.4  | 8.2  | 57.4  | 312.4  | 130.7 | 16.33 |
| 3/16/2017 13:59 | 3.6  | 9.6  | 35.5  | 133.3  | 46.8  | 13.89 |
| 3/16/2017 14:00 | 5.6  | 24.8 | 24.7  | 148.3  | 38.4  | 6.19  |
| 3/16/2017 14:01 | 6.8  | 7.9  | 40.9  | 168.4  | 73.1  | 8.42  |
| 3/16/2017 14:02 | 7.1  | 11.4 | 33    | 189.7  | 57.8  | 14.27 |
| 3/16/2017 14:03 | 6.3  | 9.9  | 27    | 142.8  | 69.9  | 12.75 |
| 3/16/2017 14:04 | 6.3  | 11.6 | 22.5  | 106.5  | 62    | 7.71  |
| 3/16/2017 14:05 | 7.1  | 14.8 | 16.9  | 82.2   | 40.4  | 7.15  |
| 3/16/2017 14:06 | 8.4  | 15.7 | 17.8  | 86.5   | 45.6  | 5.36  |
| 3/16/2017 14:07 | 9.4  | 15.6 | 16.1  | 85.8   | 34.9  | 6.14  |
| 3/16/2017 14:08 | 10.5 | 17.4 | 21.3  | 64.9   | 32.4  | 4.8   |
| 3/16/2017 14:09 | 11.1 | 17.4 | 17.8  | 54.7   | 29    | 3.32  |



|                 |      |      |      |      |      |      |
|-----------------|------|------|------|------|------|------|
| 3/16/2017 14:10 | 11.2 | 14.7 | 17.4 | 77.8 | 35.9 | 5.14 |
| 3/16/2017 14:11 | 11.4 | 19   | 18.6 | 60.5 | 21.6 | 3.91 |
| 3/16/2017 14:12 | 12.3 | 20.2 | 18.6 | 63   | 27.9 | 2.3  |
| 3/16/2017 14:13 | 12.3 | 15.2 | 20.6 | 86   | 56.5 | 5.66 |
| 3/16/2017 14:14 | 12.2 | 17.2 | 20.7 | 79.2 | 44.6 | 4.99 |
| 3/16/2017 14:15 | 11.5 | 18.6 | 22.9 | 70.2 | 39.8 | 4.22 |
| 3/16/2017 14:16 | 12.2 | 17.5 | 22.3 | 76.6 | 38.2 | 4.46 |
| 3/16/2017 14:17 | 11.8 | 15.7 | 20.8 | 77.1 | 55.6 | 4.88 |
| 3/16/2017 14:18 | 11.9 | 19.9 | 19   | 59.4 | 26   | 3.95 |
| 3/16/2017 14:19 | 12.8 | 19.7 | 23.7 | 57.1 | 34.6 | 3.48 |
| 3/16/2017 14:20 | 14.1 | 20   | 23.2 | 56.9 | 35.8 | 2.32 |
| 3/16/2017 14:21 | 14.9 | 24.2 | 23.3 | 47.4 | 13.1 | 2.6  |
| 3/16/2017 14:22 | 16.1 | 23.9 | 22.3 | 50.3 | 20   | 1.81 |
| 3/16/2017 14:23 | 16.6 | 22.4 | 25.5 | 59.5 | 20.9 | 2.88 |
| 3/16/2017 14:24 | 17.2 | 23.6 | 24.2 | 57.4 | 17.6 | 2.57 |
| 3/16/2017 14:25 | 16.7 | 22.2 | 24.5 | 57.7 | 25.1 | 3.08 |
| 3/16/2017 14:26 | 17   | 23.8 | 26   | 53.2 | 21.6 | 2.36 |
| 3/16/2017 14:27 | 16.5 | 20.5 | 24.8 | 65.8 | 30.3 | 3.46 |
| 3/16/2017 14:28 | 17.4 | 27.2 | 23.1 | 44.6 | 8.9  | 1.87 |
| 3/16/2017 14:29 | 18.1 | 25.9 | 24.1 | 52.1 | 13.3 | 1.33 |
| 3/16/2017 14:30 | 19.1 | 25.2 | 22.7 | 50.9 | 14.1 | 1.82 |
| 3/16/2017 14:31 | 18.6 | 22.6 | 24.3 | 53.2 | 18.2 | 2.01 |
| 3/16/2017 14:32 | 17.8 | 23.2 | 22.3 | 48.1 | 19.1 | 2    |
| 3/16/2017 14:33 | 17.9 | 25.6 | 23.1 | 43.9 | 19.2 | 1.82 |
| 3/16/2017 14:34 | 18.7 | 24.7 | 24.2 | 48.1 | 21.6 | 1.67 |
| 3/16/2017 14:35 | 19.1 | 25.7 | 26.8 | 54.2 | 26.3 | 2.42 |
| 3/16/2017 14:36 | 18.6 | 22.2 | 29.2 | 63.6 | 31.1 | 2.37 |
| 3/16/2017 14:37 | 17.4 | 21.4 | 30.9 | 65.6 | 30.7 | 3.25 |
| 3/16/2017 14:38 | 17.7 | 26.5 | 24.7 | 49.1 | 10.2 | 2.03 |
| 3/16/2017 14:39 | 18.8 | 26.5 | 23.6 | 52.8 | 9.9  | 1.52 |
| 3/16/2017 14:40 | 20.3 | 26.4 | 23.2 | 50.8 | 11.3 | 1.71 |
| 3/16/2017 14:41 | 21.2 | 28.8 | 23.2 | 44.7 | 5.8  | 1.17 |
| 3/16/2017 14:42 | 21.8 | 29.3 | 25   | 41.2 | 5.1  | 1.17 |
| 3/16/2017 14:43 | 23   | 30   | 25.7 | 41.2 | 4.4  | 0.88 |
| 3/16/2017 14:44 | 23.2 | 29.3 | 23.4 | 45.4 | 5.8  | 0.97 |
| 3/16/2017 14:45 | 23.2 | 28.5 | 23.1 | 46   | 6.1  | 1.11 |
| 3/16/2017 14:46 | 23.2 | 29.2 | 26.1 | 43.4 | 5.6  | 0.98 |
| 3/16/2017 14:47 | 23.2 | 28.9 | 25.2 | 45.4 | 5.1  | 1.14 |
| 3/16/2017 14:48 | 23.9 | 31.1 | 25.3 | 39.8 | 4.1  | 0.77 |
| 3/16/2017 14:49 | 24.1 | 30.6 | 27.4 | 45.5 | 3.8  | 0.81 |
| 3/16/2017 14:50 | 24.5 | 30   | 26.1 | 43.6 | 4.2  | 0.9  |
| 3/16/2017 14:51 | 24.5 | 30   | 23.7 | 44.2 | 4.1  | 0.84 |
| 3/16/2017 14:52 | 24.2 | 29.6 | 22   | 47.4 | 5    | 0.91 |
| 3/16/2017 14:53 | 23.7 | 28.3 | 23.4 | 51   | 8.4  | 1.29 |

|                 |      |      |      |      |     |       |
|-----------------|------|------|------|------|-----|-------|
| 3/16/2017 14:54 | 23.4 | 28.8 | 20   | 47.5 | 8.2 | 1.15  |
| 3/16/2017 14:55 | 24   | 32.1 | 25.9 | 39.4 | 4.4 | 0.73  |
| 3/16/2017 14:56 | 25   | 30.6 | 27.7 | 42.4 | 5.2 | 0.65  |
| 3/16/2017 14:57 | 25.6 | 31.1 | 28.7 | 42.7 | 5.5 | 0.69  |
| 3/16/2017 14:58 | 25.5 | 31   | 24.6 | 44.2 | 5.4 | 0.74  |
| 3/16/2017 14:59 | 25.3 | 30.5 | 30.2 | 43.5 | 6.1 | 0.88  |
| 3/16/2017 15:00 | 25.4 | 31.3 | 28.1 | 46.2 | 4.1 | 0.69  |
| 3/16/2017 15:01 | 25.1 | 30.5 | 27.5 | 50.7 | 4.3 | 1.04  |
| 3/16/2017 15:02 | 25.1 | 30.8 | 29.7 | 47   | 4.3 | 0.95  |
| 3/16/2017 15:03 | 24.9 | 31   | 27.1 | 44.4 | 4.1 | 0.71  |
| 3/16/2017 15:04 | 25.2 | 31.4 | 32.7 | 43.8 | 4.6 | 0.78  |
| 3/16/2017 15:05 | 25.4 | 30.4 | 28.1 | 44   | 4   | 0.68  |
| 3/16/2017 15:06 | 25.7 | 32   | 25   | 44.3 | 3.6 | 0.63  |
| 3/16/2017 15:07 | 26.1 | 32.1 | 26.3 | 45.1 | 3.6 | 0.67  |
| 3/16/2017 15:08 | 26.8 | 33.1 | 25.2 | 43.9 | 3.4 | 0.58  |
| 3/16/2017 15:09 | 26.9 | 32.2 | 28.8 | 47.4 | 3.5 | 0.71  |
| 3/16/2017 15:10 | 27.3 | 34.3 | 31.4 | 44.1 | 3.4 | 0.62  |
| 3/16/2017 15:11 | 27.5 | 33.5 | 34.1 | 43.9 | 3.2 | 0.54  |
| 3/16/2017 15:12 | 28   | 34.9 | 36.1 | 43   | 3.1 | 0.54  |
| 3/16/2017 15:13 | 28.2 | 34.1 | 43.5 | 47   | 3.2 | 0.61  |
| 3/16/2017 15:14 | 28.3 | 32.2 | 53   | 46.2 | 3.3 | 0.73  |
| 3/16/2017 15:15 | 28.2 | 34.3 | 48.1 | 46.4 | 3.4 | 0.72  |
| 3/16/2017 15:16 | 28.2 | 33   | 46.9 | 45.3 | 3.1 | 0.63  |
| 3/16/2017 15:17 | 28.4 | 34.5 | 37.5 | 45   | 3.2 | 0.7   |
| 3/16/2017 15:18 | 28.2 | 33   | 44.4 | 47.2 | 3.6 | 0.71  |
| 3/16/2017 15:19 | 28   | 33   | 32.5 | 52.4 | 4.4 | 0.9   |
| 3/16/2017 15:20 |      | 32.7 | 38.3 | 48.9 | 4.2 | 0.92  |
| 3/16/2017 15:21 |      | 31.5 | 33.3 | 44.9 | 5.2 | 0.98  |
| 3/16/2017 15:22 |      | 30.5 | 32.4 | 39.1 | 3.6 | 1.03  |
| 3/16/2017 15:23 |      | 31.8 | 28.1 | 35.1 | 3.2 | 4.77  |
| 3/16/2017 15:24 |      | 29.8 | 27.6 | 34   | 4.4 | 11.47 |
| 3/16/2017 15:25 |      | 30.4 | 25.9 | 33.3 | 3.5 | 3.14  |
| 3/16/2017 15:26 |      | 32.6 | 23.8 | 34.3 | 3.2 | 2.98  |
| 3/16/2017 15:27 |      | 33   | 24.8 | 34.3 | 3.3 | 5.4   |
| 3/16/2017 15:28 |      | 32.7 | 28.8 | 34.5 | 4.1 | 11.57 |
| 3/16/2017 15:29 |      | 34.5 | 31.5 | 34.7 | 2.7 | 3.7   |
| 3/16/2017 15:30 |      | 34.1 | 19.7 | 34.8 | 2.4 | 0.49  |
| 3/16/2017 15:31 |      | 35.8 | 23.6 | 36.9 | 2.7 | 0.76  |
| 3/16/2017 15:32 |      | 35.9 | 31.3 | 37.2 | 2.5 | 0.47  |
| 3/16/2017 15:33 |      | 36.3 | 28.8 | 37.7 | 2.5 | 0.24  |
| 3/16/2017 15:34 |      | 35.6 | 26.1 | 37.7 | 2.5 | 0.22  |
| 3/16/2017 15:35 |      | 37.1 | 32.9 | 38.3 | 2.3 | 0.25  |
| 3/16/2017 15:36 |      | 37   | 34   | 39   | 2.5 | 0.23  |
| 3/16/2017 15:37 |      | 35.9 | 30.5 | 37.5 | 2.1 | 0.17  |

|                 |      |      |      |     |       |
|-----------------|------|------|------|-----|-------|
| 3/16/2017 15:38 | 36   | 32.5 | 37.3 | 2   | 0.19  |
| 3/16/2017 15:39 | 34.5 | 28.4 | 37.1 | 2   | 0.17  |
| 3/16/2017 15:40 | 35.3 | 27.3 | 37.8 | 2.1 | 0.17  |
| 3/16/2017 15:41 | 35.7 | 28.2 | 38.3 | 2.2 | 0.24  |
| 3/16/2017 15:42 | 36.2 | 28.1 | 38.7 | 3.6 | 3.5   |
| 3/16/2017 15:43 | 38.1 | 29.2 | 40.7 | 4.2 | 7.94  |
| 3/16/2017 15:44 | 36.5 | 35.3 | 40.7 | 6.2 | 22.43 |
| 3/16/2017 15:45 | 36.6 | 34.3 | 39.6 | 4.9 | 9.68  |
| 3/16/2017 15:46 | 37.1 | 38.3 | 40.4 | 4   | 6.5   |
| 3/16/2017 15:47 | 38.6 | 39.2 | 41.4 | 3.6 | 5.17  |
| 3/16/2017 15:48 | 37.8 | 44.2 | 41.1 | 4   | 5.8   |
| 3/16/2017 15:49 | 38.2 | 35.5 | 41.2 | 3.1 | 3.57  |
| 3/16/2017 15:50 | 38.2 | 36.2 | 41.8 | 3.5 | 4.52  |
| 3/16/2017 15:51 | 37.5 | 33.6 | 41.7 | 3.7 | 4.68  |
| 3/16/2017 15:52 | 38.5 | 35.4 | 42.2 | 4   | 5.56  |
| 3/16/2017 15:53 | 39.6 | 28.2 | 43.3 | 3.7 | 4.85  |
| 3/16/2017 15:54 | 40.2 | 36.8 | 43   | 3.8 | 5.63  |
| 3/16/2017 15:55 | 40.6 | 39.4 | 43.7 | 2.9 | 3.48  |
| 3/16/2017 15:56 | 40   | 38.9 | 43.4 | 2.8 | 3.24  |
| 3/16/2017 15:57 | 38.9 | 40.6 | 43.1 | 3.1 | 3.79  |
| 3/16/2017 15:58 | 38.6 | 32.3 | 42.7 | 3.6 | 5.13  |
| 3/16/2017 15:59 | 39.2 | 31.3 | 42.8 | 3.2 | 4.37  |
| 3/16/2017 16:00 | 38.7 | 33.8 | 42.7 | 3.2 | 4.73  |
| 3/16/2017 16:01 | 37.9 | 34.6 | 42.2 | 3.7 | 5.95  |
| 3/16/2017 16:02 | 38.9 | 31.6 | 42.8 | 3.2 | 4.7   |
| 3/16/2017 16:03 | 39.1 | 33.5 | 43.5 | 3.1 | 4.17  |
| 3/16/2017 16:04 | 39.7 | 33.8 | 43.8 | 2.8 | 3.32  |
| 3/16/2017 16:05 | 40.5 | 37.1 | 43.8 | 3   | 4.01  |
| 3/16/2017 16:06 | 40.7 | 37.6 | 43.8 | 2.9 | 4.08  |
| 3/16/2017 16:07 | 41.2 | 37.7 | 44.2 | 3.1 | 3.63  |
| 3/16/2017 16:08 | 42   | 39.3 | 44.9 | 2.8 | 3.52  |
| 3/16/2017 16:09 | 40.8 | 41.2 | 44.7 | 3.3 | 4.88  |
| 3/16/2017 16:10 | 39.6 | 36.7 | 43.7 | 5.2 | 9.16  |
| 3/16/2017 16:11 | 37.8 | 35.5 | 42.2 | 6.4 | 11.75 |
| 3/16/2017 16:12 | 39.5 | 33.7 | 43.3 | 5.7 | 9.97  |
| 3/16/2017 16:13 | 40.9 | 34.7 | 43.9 | 5.2 | 8.3   |
| 3/16/2017 16:14 | 40.3 | 37.8 | 44.2 | 4.7 | 7.44  |
| 3/16/2017 16:15 | 39.9 | 39.2 | 43.6 | 4.9 | 8.15  |
| 3/16/2017 16:16 | 40.8 | 38.5 | 44.1 | 5.2 | 8.76  |
| 3/16/2017 16:17 | 38.7 | 35.6 | 43.1 | 5.9 | 8.3   |
| 3/16/2017 16:18 | 40.5 | 37.9 | 43.7 | 5.2 | 9.31  |
| 3/16/2017 16:19 | 42   | 39.4 | 45   | 4.2 | 7.62  |
| 3/16/2017 16:20 | 40.8 | 40   | 45.2 | 3.9 | 6.57  |
| 3/16/2017 16:21 | 40.6 | 40.5 | 44.4 | 5.1 | 8.88  |

|                 |  |      |      |       |     |       |
|-----------------|--|------|------|-------|-----|-------|
| 3/16/2017 16:22 |  | 39.7 | 35.2 | 44.3  | 6.7 | 12.63 |
| 3/16/2017 16:23 |  | 40.7 | 34.4 | 44.4  | 5.8 | 11.32 |
| 3/16/2017 16:24 |  | 41   | 36.4 | 44.7  | 5.7 | 11.56 |
| 3/16/2017 16:25 |  | 15.5 | 39.7 | -45.5 | 3.8 | 6.68  |
| 3/16/2017 16:26 |  | -0.6 | 19.7 | -61.7 | 4.2 | 7.19  |
| 3/16/2017 16:27 |  | -0.2 | 0    | -50.5 | 4.6 | 8.07  |
| 3/16/2017 16:28 |  | -0.5 | -2   | -43.5 | 5.5 | 10.33 |
| 3/16/2017 16:29 |  | -0.3 | -0.4 | -36.5 | 6   | 12.31 |
| 3/16/2017 16:30 |  | -0.1 | 1.2  | -30.1 | 4.9 | 9.25  |

|                 |      |      |      |       |       |       |
|-----------------|------|------|------|-------|-------|-------|
| 3/17/2017 15:10 | 35   | 40.2 | 42.9 |       |       | 0.17  |
| 3/17/2017 15:11 | 35.4 | 38.6 | 42.9 |       |       | 0.68  |
| 3/17/2017 15:12 | 35.4 | 39.4 | 40.5 |       |       | 0.51  |
| 3/17/2017 15:13 | 35.3 | 39.9 | 42.3 |       |       | 0.28  |
| 3/17/2017 15:14 | 35.6 | 39.6 | 43.1 |       |       | 0.2   |
| 3/17/2017 15:15 | 35.9 | 37   | 41.3 |       |       | 0.56  |
| 3/17/2017 15:16 | 33.5 | 24   | 31   |       |       | 2.99  |
| 3/17/2017 15:17 | 28.6 | 26.8 | 41.1 |       |       | 10.73 |
| 3/17/2017 15:18 | 18.7 | 5.7  | 36.3 |       |       | 30.53 |
| 3/17/2017 15:19 | 11.6 |      | 31.6 |       |       | 25.87 |
| 3/17/2017 15:20 | 7.3  | 11.7 | 20.3 |       | 294.9 | 12.98 |
| 3/17/2017 15:21 | 10.6 | 21.4 | 22.7 |       | 290.1 | 4.69  |
| 3/17/2017 15:22 | 13.9 | 18.8 | 24.1 |       | 91.6  | 7.46  |
| 3/17/2017 15:23 | 16.1 | 19.1 | 22.5 |       | 92.6  | 3.53  |
| 3/17/2017 15:24 | 15.4 | 12.8 | 16.8 |       | 160.1 | 4.48  |
| 3/17/2017 15:25 | 13.2 | 12.4 | 10.2 | 126.4 | 177.2 | 8.94  |
| 3/17/2017 15:26 | 11   | 14.1 | 13.4 | 105.6 | 153.4 | 6.39  |
| 3/17/2017 15:27 | 11.2 | 20.6 | 19.3 | 79.8  | 94.3  | 3.03  |
| 3/17/2017 15:28 | 13.2 | 18.6 | 18.3 | 101.4 | 144.9 | 3.91  |
| 3/17/2017 15:29 | 16.9 | 28.5 | 28.8 | 136   | 76.1  | 4.64  |
| 3/17/2017 15:30 | 18.2 | 16.3 | 22.9 | 134.2 | 102.3 | 6.53  |
| 3/17/2017 15:31 | 21.3 | 28.4 | 26.8 | 89.7  | 38.1  | 2.14  |
| 3/17/2017 15:32 | 20.5 | 20.4 | 19.5 | 90.6  | 99.3  | 5.94  |
| 3/17/2017 15:33 | 22.7 | 29.9 | 28.4 | 82.3  | 14.4  | 1.65  |
| 3/17/2017 15:34 | 23.4 | 30.4 | 30   | 81.7  | 13.5  | 2.94  |
| 3/17/2017 15:35 | 27.5 | 31.7 | 30.6 | 92.1  | 15.1  | 3.44  |
| 3/17/2017 15:36 | 29   | 33.1 | 33.6 | 81.3  | 14.6  | 3.24  |
| 3/17/2017 15:37 | 30.3 | 33   | 34.6 | 81.1  | 11.9  | 2.41  |
| 3/17/2017 15:38 | 30.9 | 34.6 | 31.4 | 71.9  | 9.9   | 1.73  |
| 3/17/2017 15:39 | 31.7 | 34.9 | 32.4 | 72.9  | 9.1   | 1.41  |
| 3/17/2017 15:40 | 33.1 | 37.9 | 34.4 | 68.2  | 4.2   | 0.58  |
| 3/17/2017 15:41 | 34.1 | 36.3 | 33.2 | 68.5  | 3.3   | 0.47  |
| 3/17/2017 15:42 | 35   | 37.2 | 32.2 | 62.4  | 3.7   | 0.34  |

|                 |      |      |       |        |       |       |
|-----------------|------|------|-------|--------|-------|-------|
| 3/17/2017 15:43 | 35.3 | 38.6 | 36.1  | 62.2   | 2.6   | 0.16  |
| 3/17/2017 15:44 | 36   | 39.2 | 35.7  | 64     | 2.1   | 0.2   |
| 3/17/2017 15:45 | 36.9 | 37.8 | 33.2  | 62.6   | 2.2   | 0.59  |
| 3/17/2017 15:46 | 37.1 | 38.6 | 34.9  | 63.2   | 3.5   | 5.16  |
| 3/17/2017 15:47 | 34.2 | 25.6 | 28.4  | 68.8   | 98.5  | 19.87 |
| 3/17/2017 15:48 | 25.4 | 29.6 | 48.8  | 603.4  | 489.7 | 44.86 |
| 3/17/2017 15:49 | 15.3 | 13.1 | 28    | 280.9  | 164.2 | 34.64 |
| 3/17/2017 15:50 | 9.6  | 20.1 | 28.6  | 195.8  | 204.6 | 32.17 |
| 3/17/2017 15:51 | 10.7 | 18.4 | 24.9  | 149.7  | 66.4  | 21.66 |
| 3/17/2017 15:52 | 13.2 | 34.5 | 37.1  | 363.6  | 313.1 | 20.15 |
| 3/17/2017 15:53 | 11.4 | 13.6 | 73.9  | 970.3  | 254.5 | 64.83 |
| 3/17/2017 15:54 | 8.6  | 10.2 | 50.4  | 790.7  | 285.8 | 52    |
| 3/17/2017 15:55 | 4.7  | 3.9  | 111.2 | 1134.7 | 358.1 | 94.23 |
| 3/17/2017 15:56 | 3    | -1.8 | 45    | 493.6  | 170.7 | 54.31 |
| 3/17/2017 15:57 | 3.1  | 9.8  | 18.5  | 215.8  | 77.1  | 16.47 |
| 3/17/2017 15:58 | 6.6  | 19.3 | 14.4  | 100.3  | 21.8  | 5.24  |
| 3/17/2017 15:59 | 9.4  | 12.3 | 15.6  | 149.4  | 66.9  | 7.94  |
| 3/17/2017 16:00 | 11.6 | 17.6 | 15.8  | 112.7  | 27.9  | 10.37 |
| 3/17/2017 16:01 | 13.2 | 21.4 | 15.8  | 76.7   | 16.7  | 3.12  |
| 3/17/2017 16:02 | 15.1 | 21.8 | 14.8  | 63.5   | 14.4  | 1.19  |
| 3/17/2017 16:03 | 18.1 | 25.7 | 18.7  | 62.8   | 12    | 4.22  |
| 3/17/2017 16:04 | 19.8 | 25.7 | 17.9  | 58.7   | 13.6  | 2.67  |
| 3/17/2017 16:05 | 21.6 | 28.6 | 22.1  | 56.2   | 9.6   | 0.61  |
| 3/17/2017 16:06 | 23.3 | 30.7 | 23.5  | 55.7   | 4.5   | 0.94  |
| 3/17/2017 16:07 | 25.2 | 31.4 | 24.7  | 56.2   | 4.1   | 0.28  |
| 3/17/2017 16:08 | 26.1 | 30   | 21.5  | 53.8   | 8.7   | 0.09  |
| 3/17/2017 16:09 | 25.9 | 29.3 | 22.5  | 59.9   | 20.9  | 1.19  |
| 3/17/2017 16:10 | 20.2 | 16.5 | 70.3  | 692.7  | 668.8 | 24.16 |
| 3/17/2017 16:11 | 12.5 | 6.7  | 44.2  | 493.8  | 463.7 | 31.03 |
| 3/17/2017 16:12 | 5    | 5.7  | 26.8  | 373.9  | 429.3 | 23.87 |
| 3/17/2017 16:13 | 2.9  | 12.1 | 24.1  | 286.6  | 298.5 | 22.03 |
| 3/17/2017 16:14 | 5    | 22.2 | 39.1  | 363.7  | 179.4 | 38.51 |
| 3/17/2017 16:15 | 8.4  | 11.1 | 25.5  | 267.7  | 113.1 | 19.16 |
| 3/17/2017 16:16 | 10.4 | 17.9 | 28    | 272.3  | 116.4 | 24.61 |
| 3/17/2017 16:17 | 11.8 | 20.7 | 23.1  | 200.7  | 55.6  | 19.44 |
| 3/17/2017 16:18 | 13.2 | 21.7 | 24.7  | 181.2  | 37    | 14.1  |
| 3/17/2017 16:19 | 15.9 | 20.8 | 20.9  | 140.8  | 40.9  | 10.74 |
| 3/17/2017 16:20 | 17.3 | 23.8 | 26.1  | 165.7  | 75.9  | 13.54 |
| 3/17/2017 16:21 | 16.9 | 19.9 | 22.5  | 172.2  | 41.6  | 10.27 |
| 3/17/2017 16:22 | 15.5 | 19.9 | 24.7  | 163.3  | 41.6  | 14.63 |
| 3/17/2017 16:23 | 17.1 | 29.2 | 20.9  | 97.2   | 15.8  | 4.06  |
| 3/17/2017 16:24 | 18.9 | 23.1 | 19.3  | 100.9  | 33.7  | 5.23  |
| 3/17/2017 16:25 | 21.9 | 28.6 | 22.1  | 73.4   | 17.9  | 2.24  |
| 3/17/2017 16:26 | 22.5 | 29.2 | 20.3  | 72.7   | 11.6  | 2     |

|                 |      |       |       |        |        |        |
|-----------------|------|-------|-------|--------|--------|--------|
| 3/17/2017 16:27 | 25   | 33.9  | 24.1  | 62.1   | 7.2    | 1.43   |
| 3/17/2017 16:28 | 27.2 | 34.9  | 25.7  | 64.3   | 8      | 3.02   |
| 3/17/2017 16:29 | 28.9 | 34.4  | 27.8  | 63.2   | 8.2    | 2.44   |
| 3/17/2017 16:30 | 29.7 | 34.7  | 31.2  | 65.8   | 8.5    | 2.14   |
| 3/17/2017 16:31 | 30.1 | 35.7  | 27.6  | 69     | 6      | 1.28   |
| 3/17/2017 16:32 | 31.1 | 35.1  | 27.8  | 64.8   | 4.5    | 2.38   |
| 3/17/2017 16:33 | 31.5 | 37.4  | 30.8  | 61.4   | 5.2    | 4.65   |
| 3/17/2017 16:34 | 32.5 | 38.2  | 28.8  | 61.1   | 2.9    | 0.43   |
| 3/17/2017 16:35 | 33.3 | 38.6  | 31.6  | 62.3   | 2.7    | 0.15   |
| 3/17/2017 16:36 | 34.2 | 36.9  | 28.8  | 61.8   | 2.6    | 0.08   |
| 3/17/2017 16:37 | 33.9 | 36.3  | 31.2  | 59.5   | 5.8    | 0.14   |
| 3/17/2017 16:38 | 32.4 | 33    | 28.2  | 59.1   | 30.5   | 0.23   |
| 3/17/2017 16:39 | 30.1 | 28.7  | 24.1  | 69.6   | 34.8   | 0.55   |
| 3/17/2017 16:40 | 24.4 | 19.1  | 22.9  | 221.2  | 260.5  | 7.32   |
| 3/17/2017 16:41 | 15.4 | 20.2  | 65.4  | 657.5  | 559.2  | 28.31  |
| 3/17/2017 16:42 | 6.7  | 9.1   | 85.4  | 962.6  | 664.5  | 43.36  |
| 3/17/2017 16:43 | 1.7  | -3.6  | 70.7  | 1191.6 | 697.2  | 48.76  |
| 3/17/2017 16:44 | 1    | 26.8  | 64.8  | 949.2  | 972.5  | 45.54  |
| 3/17/2017 16:45 | 0.7  | -17   | 119.9 | 2110.2 | 1347.4 | 72.1   |
| 3/17/2017 16:46 | 0.6  | 22.8  | 117.6 | 1596.7 | 749.1  | 79.52  |
| 3/17/2017 16:47 | 0.5  | 5.9   | 38.3  | 717.3  | 487.2  | 37.69  |
| 3/17/2017 16:48 | 0.8  | -0.8  | 29    | 471.4  | 361.7  | 24.87  |
| 3/17/2017 16:49 | 1.3  | 11.1  | 23.7  | 338.5  | 340.9  | 19.25  |
| 3/17/2017 16:50 | 1.4  | 7.8   | 23.9  | 335.2  | 397.8  | 24.29  |
| 3/17/2017 16:51 | 1.9  | 10.1  | 11.8  | 219.2  | 206.2  | 15.2   |
| 3/17/2017 16:52 | 2.5  | 4     | 14.6  | 240.2  | 271.6  | 13.26  |
| 3/17/2017 16:53 | 3    | 4     | 14.4  | 242.4  | 256.2  | 14.31  |
| 3/17/2017 16:54 | 3    | 10.2  | 13.2  | 216.7  | 240    | 12.69  |
| 3/17/2017 16:55 | 2.7  | 5.5   | 16    | 263    | 286.7  | 15.79  |
| 3/17/2017 16:56 | 3.2  | 15.6  | 16    | 171.4  | 187.5  | 10.24  |
| 3/17/2017 16:57 | 3.6  | 9.5   | 17.9  | 206.7  | 212    | 11.74  |
| 3/17/2017 16:58 | 4    | 3     | 15.6  | 209.8  | 298.5  | 11.01  |
| 3/17/2017 16:59 | 3.5  | 12.4  | 16.4  | 239.2  | 449.4  | 11.66  |
| 3/17/2017 17:00 | 2.3  | 75.1  | 68.7  | 885.5  | 910.4  | 46.11  |
| 3/17/2017 17:01 | 1.3  | -25.5 | 82    | 1334.3 | 256.1  | 123.33 |
| 3/17/2017 17:02 | 1.5  | -4.3  | 27.6  | 528.8  | 100.3  | 58.96  |
| 3/17/2017 17:03 | 3.3  | 8     | 13.2  | 236.1  | 49.3   | 21.5   |
| 3/17/2017 17:04 | 5.6  | 12.5  | 20.3  | 329.9  | 61.7   | 13.97  |
| 3/17/2017 17:05 | 6.8  | 14.2  | 25.3  | 376.1  | 532.3  | 19.87  |
| 3/17/2017 17:06 | 5.8  | 34.5  | 65.8  | 889.7  | 340.1  | 55.21  |
| 3/17/2017 17:07 | 3.7  | -8.3  | 61.2  | 665.3  | 219    | 49.47  |
| 3/17/2017 17:08 | 3.4  | 6.4   | 11.8  | 193.1  | 52.8   | 12.83  |
| 3/17/2017 17:09 | 5.5  | 15.5  | 8.7   | 92.5   | 22.4   | 2.57   |
| 3/17/2017 17:10 | 8.3  | 14.8  | 7.3   | 82     | 25.1   | 3.51   |

|                 |      |      |      |      |      |      |
|-----------------|------|------|------|------|------|------|
| 3/17/2017 17:11 | 10.1 | 15.2 | 8.5  | 75.3 | 18.4 | 2.43 |
| 3/17/2017 17:12 | 11   | 17.9 | 6.9  | 71.1 | 14.9 | 1.55 |
| 3/17/2017 17:13 | 12.3 | 20.4 | 8.1  | 55.2 | 10.5 | 0.24 |
| 3/17/2017 17:14 | 14   | 21.3 | 10.4 | 53   | 8.5  | 0.04 |
| 3/17/2017 17:15 | 15.2 | 21.1 | 8.3  | 52.6 | 7.8  | 0.02 |
| 3/17/2017 17:16 | 15.4 | 19.7 | 8.9  | 53.1 | 7.5  | 0.05 |
| 3/17/2017 17:17 | 15.7 | 22.7 | 12   | 53   | 7.2  | 0.02 |
| 3/17/2017 17:18 | 16.3 | 24.3 | 12.8 | 52.9 | 6.7  | 0.03 |
| 3/17/2017 17:19 | 17.8 | 26.3 | 12.4 | 51.1 | 6    | 0.01 |
| 3/17/2017 17:20 | 18.7 | 23.5 | 13.4 | 51.4 | 5.6  | 0.01 |
| 3/17/2017 17:21 | 19.3 | 24.5 | 12.2 | 51.8 | 5.5  | 0.2  |
| 3/17/2017 17:22 | 19.1 | 24.2 | 13   | 51.3 | 5.5  | 0.78 |
| 3/17/2017 17:23 | 19.3 | 25.8 | 15   | 50.4 | 5.5  | 0.03 |
| 3/17/2017 17:24 | 19.3 | 25   | 14.2 | 50.1 | 6.4  | 0.02 |
| 3/17/2017 17:25 | 19.8 | 25.6 | 14.8 | 51.6 | 6    | 0.01 |
| 3/17/2017 17:26 | 20.3 | 27   | 13.8 | 51.6 | 5.3  | 0.02 |
| 3/17/2017 17:27 | 20.9 | 25.9 | 14.8 | 51.4 | 5.2  | 0.01 |
| 3/17/2017 17:28 | 20.9 | 25.3 | 13.8 | 50.1 | 4.8  | 0.02 |
| 3/17/2017 17:29 | 20.3 | 24.1 | 11.8 | 47.8 | 9.3  | 0.2  |
| 3/17/2017 17:30 | 20.2 | 27.2 | 12.2 | 50.6 | 4.7  | 0.02 |

|                |      |      |      |      |       |       |
|----------------|------|------|------|------|-------|-------|
| 3/20/2017 9:30 | 20.7 | 22.7 | 19.8 | 40.2 | 3.463 | 0.67  |
| 3/20/2017 9:31 | 20.1 | 20.3 | 20.7 | 38.5 | 7.337 | 5.99  |
| 3/20/2017 9:32 | 20   | 21.5 | 20.3 | 38.8 | 3.553 | 0.37  |
| 3/20/2017 9:33 | 20.2 | 21.1 | 20.7 | 39.8 | 3.373 | 0.23  |
| 3/20/2017 9:34 | 20.6 | 20.2 | 21.5 | 40.8 | 4.544 | 8.38  |
| 3/20/2017 9:35 | 20.4 | 22.2 | 22.5 | 41.2 | 6.616 | 14.31 |
| 3/20/2017 9:36 | 20.2 | 20.6 | 22.5 | 41.2 | 8.959 | 22.6  |
| 3/20/2017 9:37 | 20.4 | 23.2 | 20.7 | 40.3 | 5.445 | 6.02  |
| 3/20/2017 9:38 | 21   | 21.9 | 21.6 | 40   | 4.454 | 3.18  |
| 3/20/2017 9:39 | 21.1 | 20.5 | 20.7 | 38.7 | 3.914 | 2     |
| 3/20/2017 9:40 | 21   | 21.7 | 19.3 | 39.5 | 3.643 | 0.97  |
| 3/20/2017 9:41 | 20.9 | 21.9 | 21.5 | 40.3 | 3.553 | 0.51  |
| 3/20/2017 9:42 | 21.3 | 22.7 | 21.2 | 41.1 | 3.373 | 0.29  |
| 3/20/2017 9:43 | 22.1 | 23.1 | 21.4 | 40.7 | 3.463 | 0.35  |
| 3/20/2017 9:44 | 22.3 | 22.2 | 22.2 | 40.6 | 3.643 | 0.29  |
| 3/20/2017 9:45 | 22.7 | 24.1 | 23.3 | 41.9 | 3.643 | 0.25  |
| 3/20/2017 9:46 | 23.2 | 23.8 | 23   | 42.5 | 3.643 | 0.24  |
| 3/20/2017 9:47 | 23.8 | 24   | 22   | 42.4 | 3.643 | 0.21  |
| 3/20/2017 9:48 | 24   | 23.2 | 22.8 | 42.4 | 3.643 | 0.22  |
| 3/20/2017 9:49 | 23.7 | 22.8 | 22.2 | 42.4 | 3.823 | 0.23  |
| 3/20/2017 9:50 | 23.5 | 22.9 | 22.4 | 41.6 | 3.733 | 0.21  |
| 3/20/2017 9:51 | 23.1 | 22   | 22.1 | 41.5 | 3.823 | 0.24  |

|                 |      |      |      |      |       |      |
|-----------------|------|------|------|------|-------|------|
| 3/20/2017 9:52  | 23.1 | 23.9 | 22.3 | 41.7 | 3.823 | 0.21 |
| 3/20/2017 9:53  | 23.4 | 24.6 | 22.7 | 43.2 | 3.643 | 0.25 |
| 3/20/2017 9:54  | 24   | 24.6 | 23.6 | 42.3 | 3.643 | 0.35 |
| 3/20/2017 9:55  | 24.5 | 24   | 23.8 | 42.4 | 3.643 | 0.18 |
| 3/20/2017 9:56  | 24.3 | 22.9 | 22.5 | 42   | 3.733 | 0.18 |
| 3/20/2017 9:57  | 24.1 | 24.9 | 24   | 43.9 | 3.463 | 0.19 |
| 3/20/2017 9:58  | 24.1 | 24.4 | 23.1 | 43.4 | 3.463 | 0.17 |
| 3/20/2017 9:59  | 24.3 | 24.5 | 24.1 | 43.8 | 3.553 | 0.18 |
| 3/20/2017 10:00 | 24.4 | 23.9 | 23.1 | 44.9 | 3.463 | 0.19 |
| 3/20/2017 10:01 | 24.3 | 25.1 | 23.7 | 45   | 3.283 | 0.16 |
| 3/20/2017 10:02 | 24.7 | 25.4 | 25   | 45.9 | 3.193 | 0.19 |
| 3/20/2017 10:03 | 25.1 | 25.8 | 23.8 | 45.5 | 3.193 | 0.19 |
| 3/20/2017 10:04 | 25.5 | 24.7 | 24.7 | 45.9 | 3.283 | 0.37 |
| 3/20/2017 10:05 | 25.6 | 26.4 | 24.7 | 46.7 | 3.283 | 0.52 |
| 3/20/2017 10:06 | 25.6 | 25.3 | 24.9 | 46.1 | 3.463 | 0.53 |
| 3/20/2017 10:07 | 25.5 | 24.5 | 23.5 | 45.1 | 3.553 | 0.44 |
| 3/20/2017 10:08 | 25.3 | 25.4 | 25.5 | 46.3 | 3.643 | 0.31 |
| 3/20/2017 10:09 | 25.3 | 25.3 | 25   | 45.9 | 3.193 | 0.22 |
| 3/20/2017 10:10 | 25.6 | 25.9 | 23.7 | 47   | 3.103 | 0.25 |
| 3/20/2017 10:11 | 25.8 | 25.3 | 24.6 | 46.8 | 3.103 | 0.2  |
| 3/20/2017 10:12 | 25.8 | 25.7 | 24.3 | 45.8 | 3.193 | 0.17 |
| 3/20/2017 10:13 | 25.6 | 25.4 | 23.3 | 46.5 | 3.103 | 0.33 |
| 3/20/2017 10:14 | 25.9 | 26.3 | 25.9 | 47.5 | 3.013 | 0.19 |
| 3/20/2017 10:15 | 26.2 | 25.9 | 25.6 | 47.5 | 3.013 | 0.23 |
| 3/20/2017 10:16 | 26.4 | 26.6 | 24.9 | 47   | 3.103 | 0.22 |
| 3/20/2017 10:17 | 26.4 | 26.7 | 26.2 | 47.9 | 3.013 | 0.17 |
| 3/20/2017 10:18 | 26.8 | 28   | 26.6 | 49.3 | 2.923 | 0.16 |
| 3/20/2017 10:19 | 27.1 | 26.8 | 25.9 | 47.8 | 6.076 | 0.32 |
| 3/20/2017 10:20 | 27.1 | 26.6 | 25.8 | 49.6 | 3.193 | 0.26 |
| 3/20/2017 10:21 | 26.5 | 25.6 | 24.8 | 48.2 | 3.553 | 0.55 |
| 3/20/2017 10:22 | 25.7 | 25.3 | 25.5 | 50.4 | 7.517 | 7.08 |
| 3/20/2017 10:23 | 25.6 | 26.9 | 26.5 | 47.5 | 4.364 | 0.38 |
| 3/20/2017 10:24 | 25.3 | 24.5 | 23   | 45.6 | 5.986 | 1.42 |
| 3/20/2017 10:25 | 25.8 | 27   | 26.1 | 48.6 | 4.364 | 0.31 |
| 3/20/2017 10:26 | 25.8 | 26   | 25.4 | 48.3 | 3.193 | 0.28 |
| 3/20/2017 10:27 | 26.1 | 26   | 25.7 | 49.6 | 3.643 | 1.21 |
| 3/20/2017 10:28 | 26   | 26   | 26.6 | 49.2 | 4.004 | 3.09 |
| 3/20/2017 10:29 | 25.8 | 25.6 | 26.1 | 49.4 | 3.283 | 0.31 |
| 3/20/2017 10:30 | 25.9 | 26.3 | 26.7 | 49.1 | 3.373 | 0.2  |
| 3/20/2017 10:31 | 26.3 | 26.5 | 26.8 | 50.5 | 3.103 | 0.2  |
| 3/20/2017 10:32 | 26.6 | 26.5 | 26.4 | 48.9 | 3.283 | 1.37 |
| 3/20/2017 10:33 | 26.7 | 26.7 | 24.9 | 50.2 | 3.283 | 0.26 |
| 3/20/2017 10:34 | 26.5 | 26.2 | 26.1 | 50   | 3.463 | 0.21 |
| 3/20/2017 10:35 | 26.4 | 26.2 | 25.8 | 49.4 | 3.823 | 0.2  |



|                 |      |      |       |        |         |        |
|-----------------|------|------|-------|--------|---------|--------|
| 3/20/2017 10:36 | 26.6 | 26.9 | 26.3  | 49.9   | 4.094   | 0.17   |
| 3/20/2017 10:37 | 27   | 27.4 | 26.1  | 50.5   | 3.013   | 0.19   |
| 3/20/2017 10:38 | 27.1 | 26.1 | 25.4  | 49.9   | 3.283   | 0.21   |
| 3/20/2017 10:39 | 27   | 27.6 | 25.8  | 50.9   | 3.013   | 0.23   |
| 3/20/2017 10:40 | 27.2 | 28.3 | 26    | 50.8   | 2.923   | 0.65   |
| 3/20/2017 10:41 | 27.5 | 27.9 | 26.2  | 51.4   | 2.923   | 0.39   |
| 3/20/2017 10:42 | 28.2 | 29.3 | 27.5  | 52.4   | 2.742   | 0.39   |
| 3/20/2017 10:43 | 28.8 | 30.1 | 28.7  | 53.4   | 2.652   | 0.35   |
| 3/20/2017 10:44 | 29.6 | 30.4 | 28.8  | 53.8   | 2.562   | 0.28   |
| 3/20/2017 10:45 | 27.3 | 37.5 | 38    | 644.7  | 773.193 | 10.15  |
| 3/20/2017 10:46 | 18.2 | -1.3 | 95.4  | 1523.5 | 371.391 | 48.38  |
| 3/20/2017 10:47 | 9.4  | 3.7  | 39.4  | 623    | 217.247 | 19.5   |
| 3/20/2017 10:48 | 3.9  | 12.6 | 30.5  | 266.2  | 187.427 | 13.07  |
| 3/20/2017 10:49 | 5.6  | 10.7 | 17.3  | 124.8  | 53.823  | 7.65   |
| 3/20/2017 10:50 | 8.2  | 14   | 14.7  | 97.8   | 41.932  | 3.3    |
| 3/20/2017 10:51 | 9.4  | 7.9  | 20.5  | 229.5  | 135.986 | 7.56   |
| 3/20/2017 10:52 | 8.5  | 7.6  | 23.8  | 284.5  | 199.409 | 11.43  |
| 3/20/2017 10:53 | 6.6  | 9.2  | 30.7  | 409.4  | 152.022 | 10.84  |
| 3/20/2017 10:54 | 5.4  | 4.2  | 38.5  | 400.2  | 161.391 | 17.73  |
| 3/20/2017 10:55 | 5.8  | 13.7 | 25.3  | 280    | 85.535  | 8.98   |
| 3/20/2017 10:56 | 6    | 8.1  | 30.9  | 302.3  | 91.121  | 10.26  |
| 3/20/2017 10:57 | 6.1  | 13.3 | 38.8  | 430.4  | 246.076 | 13.35  |
| 3/20/2017 10:58 | 5.5  | 9.2  | 43.6  | 362.2  | 173.733 | 14.61  |
| 3/20/2017 10:59 | 5.1  | 7.8  | 34.3  | 272.3  | 109.95  | 11.74  |
| 3/20/2017 11:00 | 5.3  | 15   | 39.3  | 322.8  | 169.319 | 12.2   |
| 3/20/2017 11:01 | 6.2  | 9.8  | 24.3  | 202.9  | 59.499  | 7.82   |
| 3/20/2017 11:02 | 6.7  | 11.2 | 28.5  | 279.5  | 102.562 | 8.9    |
| 3/20/2017 11:03 | 6.7  | 9.4  | 27.5  | 246.9  | 92.742  | 9.67   |
| 3/20/2017 11:04 | 6.7  | 11.8 | 21.9  | 196    | 86.436  | 7.12   |
| 3/20/2017 11:05 | 6.8  | 8.2  | 24.3  | 220.6  | 59.229  | 7.06   |
| 3/20/2017 11:06 | 7    | 14.3 | 23.7  | 278.2  | 55.715  | 8.51   |
| 3/20/2017 11:07 | 6.5  | 11.1 | 30.2  | 333    | 94.184  | 13.7   |
| 3/20/2017 11:08 | 6.6  | 7.7  | 23.9  | 214.8  | 87.157  | 9.43   |
| 3/20/2017 11:09 | 6.9  | 10.9 | 26.9  | 274.8  | 113.193 | 11.16  |
| 3/20/2017 11:10 | 7.7  | 11   | 24.8  | 212.7  | 103.013 | 10.05  |
| 3/20/2017 11:11 | 7.7  | 14.7 | 23.6  | 264.6  | 145.265 | 8.52   |
| 3/20/2017 11:12 | 6.6  | 7.1  | 31.3  | 307.8  | 177.697 | 12.26  |
| 3/20/2017 11:13 | 5.8  | 8.3  | 22.2  | 197.1  | 98.058  | 7.88   |
| 3/20/2017 11:14 | 4.6  | 37.8 | 125.9 | 1666.7 | 436.166 | 46.68  |
| 3/20/2017 11:15 | 3.6  | 16.9 | 230.7 | 2427.3 | 445.175 | 116.18 |
| 3/20/2017 11:16 | 2    | 22.4 | 199.9 | 2110   | 310.4   | 107.12 |
| 3/20/2017 11:17 | 0.9  | -0.2 | 136.8 | 1921.4 | 241.301 | 81.71  |
| 3/20/2017 11:18 | 0.9  | 2.3  | 127.7 | 1542.9 | 234.905 | 82.72  |
| 3/20/2017 11:19 | 0.9  | 13.4 | 94.9  | 1114.6 | 222.923 | 63.37  |

|                 |     |      |       |        |         |       |
|-----------------|-----|------|-------|--------|---------|-------|
| 3/20/2017 11:20 | 0.8 | 5.6  | 112.6 | 1424.6 | 279.589 | 75.88 |
| 3/20/2017 11:21 | 0.8 | 2    | 80.7  | 944.7  | 160.31  | 64.08 |
| 3/20/2017 11:22 | 1   | 18   | 50.8  | 681.1  | 119.95  | 41.95 |
| 3/20/2017 11:23 | 1.3 | 8.3  | 49.3  | 627.4  | 268.508 | 42.9  |
| 3/20/2017 11:24 | 1.5 | 7.2  | 41.8  | 571.7  | 131.751 | 37.75 |
| 3/20/2017 11:25 | 1.7 | 0.3  | 37    | 519.1  | 103.193 | 33.96 |
| 3/20/2017 11:26 | 2   | 7.6  | 34.8  | 490.5  | 124.184 | 30.5  |
| 3/20/2017 11:27 | 2.4 | 4.7  | 26.9  | 398.3  | 103.103 | 26.37 |
| 3/20/2017 11:28 | 2.9 | 13.5 | 20.1  | 333.8  | 64.004  | 21.53 |
| 3/20/2017 11:29 | 3.2 | 4.6  | 24.7  | 373.6  | 92.562  | 23.2  |
| 3/20/2017 11:30 | 3.7 | 7.2  | 12.7  | 190.1  | 53.733  | 15.22 |
| 3/20/2017 11:31 | 4.2 | 9.9  | 10.4  | 216    | 65.895  | 11.88 |
| 3/20/2017 11:32 | 4.7 | 9.6  | 13.6  | 254.5  | 94.995  | 13.26 |
| 3/20/2017 11:33 | 4.5 | 9.1  | 19.6  | 254.8  | 209.499 | 12.55 |
| 3/20/2017 11:34 | 3.6 | 25.4 | 48.6  | 701.5  | 424.094 | 20.29 |
| 3/20/2017 11:35 | 2.5 | 7    | 100.5 | 1060.2 | 455.355 | 40.1  |
| 3/20/2017 11:36 | 2.4 | 1.4  | 28.7  | 355.4  | 103.193 | 18.06 |
| 3/20/2017 11:37 | 2.6 | 8.3  | 34    | 437.2  | 110.31  | 19.69 |
| 3/20/2017 11:38 | 3.3 | 4.3  | 25    | 292    | 113.733 | 15.45 |
| 3/20/2017 11:39 | 3.6 | 7.2  | 14    | 196.5  | 84.905  | 10.06 |
| 3/20/2017 11:40 | 3.9 | 11.3 | 17    | 248.6  | 126.526 | 9.9   |
| 3/20/2017 11:41 | 4   | 8.2  | 19.6  | 256.3  | 121.211 | 13.01 |
| 3/20/2017 11:42 | 4.4 | 11.2 | 9.4   | 126.1  | 59.859  | 7.41  |
| 3/20/2017 11:43 | 5.2 | 12.1 | 5.9   | 102.6  | 51.661  | 4.22  |
| 3/20/2017 11:44 | 6.3 | 10.7 | 6.8   | 109.5  | 65.715  | 4.86  |
| 3/20/2017 11:45 | 6.6 | 9.1  | 7     | 98.3   | 60.58   | 6.02  |
| 3/20/2017 11:46 | 6.5 | 17.4 | 20.3  | 328.3  | 164.995 | 7.72  |
| 3/20/2017 11:47 | 4.9 | 0.8  | 56.3  | 594.6  | 362.652 | 23.98 |
| 3/20/2017 11:48 | 4.1 | 10.5 | 24.4  | 235.8  | 102.112 | 14.35 |
| 3/20/2017 11:49 | 3.6 | 9.8  | 21.2  | 266.7  | 181.301 | 10.43 |
| 3/20/2017 11:50 | 4.2 | 29.3 | 27.5  | 422    | 213.373 | 11.95 |
| 3/20/2017 11:51 | 3.4 | 48.6 | 134.2 | 1404.7 | 592.923 | 51.67 |
| 3/20/2017 11:52 | 2.2 | 31.6 | 210.8 | 1628.3 | 458.148 | 92.59 |
| 3/20/2017 11:53 | 1.1 | 10.2 | 161.9 | 1567.5 | 574.905 | 70.45 |
| 3/20/2017 11:54 | 0.7 | 6.7  | 145.4 | 1386.4 | 452.382 | 68.45 |
| 3/20/2017 11:55 | 0.7 | 8.2  | 73    | 875.4  | 347.517 | 41.6  |
| 3/20/2017 11:56 | 0.7 | 6    | 77.7  | 984.3  | 364.094 | 40.51 |
| 3/20/2017 11:57 | 0.7 | 10.7 | 71.5  | 863.2  | 353.914 | 41.5  |
| 3/20/2017 11:58 | 0.7 | 1.7  | 53.3  | 624    | 277.337 | 34.86 |
| 3/20/2017 11:59 | 1.1 | 4.1  | 14.5  | 292.9  | 94.634  | 14.77 |
| 3/20/2017 12:00 | 1.4 | 7.2  | 33.1  | 498.9  | 252.652 | 20.6  |
| 3/20/2017 12:01 | 1.5 | 4.4  | 24.5  | 381.3  | 220.04  | 18.94 |
| 3/20/2017 12:02 | 1.2 | 2.3  | 37.3  | 467.4  | 285.085 | 22.24 |
| 3/20/2017 12:03 | 1.2 | 8.3  | 29.8  | 416.7  | 244.004 | 20.11 |

|                 |     |      |      |       |         |       |
|-----------------|-----|------|------|-------|---------|-------|
| 3/20/2017 12:04 | 1.3 | 4    | 28.8 | 383.6 | 199.859 | 19.85 |
| 3/20/2017 12:05 | 1.5 | 2.9  | 28   | 393.7 | 218.328 | 16.28 |
| 3/20/2017 12:06 | 1.8 | 18.9 | 23.6 | 460.4 | 183.283 | 15.14 |
| 3/20/2017 12:07 | 1.8 | -1.4 | 39.7 | 519.5 | 203.463 | 22.23 |
| 3/20/2017 12:08 | 1.6 | 11.7 | 40.4 | 601.7 | 276.706 | 23.11 |
| 3/20/2017 12:09 | 1.4 | 4.6  | 37.9 | 507.6 | 205.625 | 21.9  |
| 3/20/2017 12:10 | 1.5 | -4.9 | 23.9 | 424.6 | 235.535 | 17.74 |
| 3/20/2017 12:11 | 1.6 | 9.9  | 22   | 397.6 | 228.778 | 17.48 |
| 3/20/2017 12:12 | 1.5 | 4.7  | 42.8 | 597.1 | 277.968 | 25.7  |
| 3/20/2017 12:13 | 1.3 | 0.7  | 29.3 | 384.7 | 209.769 | 21.82 |
| 3/20/2017 12:14 | 1.2 | 2.3  | 29.8 | 459.3 | 275.445 | 21.23 |
| 3/20/2017 12:15 | 1.5 | 2.3  | 13.2 | 247.3 | 139.319 | 12.95 |
| 3/20/2017 12:16 | 1.8 | 3.9  | 13.9 | 248.3 | 156.796 | 13.13 |
| 3/20/2017 12:17 | 2.2 | 4.7  | 16.2 | 232.1 | 187.787 | 13.4  |
| 3/20/2017 12:18 | 2.4 | 7.9  | 11.7 | 163   | 125.085 | 10.48 |
| 3/20/2017 12:19 | 2.2 | 5.8  | 27.7 | 268.7 | 246.166 | 18.04 |
| 3/20/2017 12:20 | 2   | 6.2  | 17.5 | 198.4 | 173.103 | 13.36 |
| 3/20/2017 12:21 | 1.7 | 2.5  | 13.6 | 162.5 | 184.995 | 11.88 |
| 3/20/2017 12:22 | 1.8 | 2.4  | 12.8 | 153.2 | 171.841 | 11.19 |
| 3/20/2017 12:23 | 1.9 | 6.8  | 13.1 | 178.5 | 171.571 | 10.87 |
| 3/20/2017 12:24 | 2.1 | 3.7  | 13   | 143.7 | 121.841 | 9.76  |
| 3/20/2017 12:25 | 3.1 | 10.2 | 6.1  | 97.3  | 67.968  | 4.33  |
| 3/20/2017 12:26 | 3.7 | 6.3  | 13   | 166.5 | 122.742 | 8.31  |
| 3/20/2017 12:27 | 4   | 8.4  | 19.4 | 231.2 | 166.256 | 11.97 |
| 3/20/2017 12:28 | 3.2 | 4.1  | 18.5 | 189.1 | 154.184 | 12.59 |
| 3/20/2017 12:29 | 2.6 | 2.7  | 24.1 | 235.6 | 172.202 | 15.01 |
| 3/20/2017 12:30 | 2.3 | 5.5  | 18.3 | 198.4 | 172.832 | 12.32 |
| 3/20/2017 12:31 | 2.1 | 9.3  | 21.1 | 227.4 | 190.58  | 13.57 |
| 3/20/2017 12:32 | 1.9 | -0.7 | 27.2 | 212.2 | 164.184 | 16.88 |
| 3/20/2017 12:33 | 2.5 | 8.3  | 8.6  | 128   | 109.319 | 7.14  |
| 3/20/2017 12:34 | 2.8 | 4.4  | 12.8 | 139.9 | 122.022 | 9.48  |
| 3/20/2017 12:35 | 3.9 | 7.6  | 6.9  | 99.8  | 117.607 | 5.72  |
| 3/20/2017 12:36 | 3.9 | 8.8  | 11.3 | 144.5 | 128.508 | 7.28  |
| 3/20/2017 12:37 | 4   | 4.7  | 12.2 | 126   | 124.634 | 8.55  |
| 3/20/2017 12:38 | 4.2 | 12.1 | 7.6  | 92.4  | 96.436  | 4.56  |
| 3/20/2017 12:39 | 4   | 5.8  | 13.7 | 142   | 147.247 | 8.92  |
| 3/20/2017 12:40 | 4.1 | 6.5  | 14.5 | 123.4 | 104.995 | 8.23  |
| 3/20/2017 12:41 | 4.6 | 11   | 7.4  | 68.4  | 45.085  | 2.97  |
| 3/20/2017 12:42 | 5.8 | 13.6 | 9.4  | 85.3  | 64.995  | 3.54  |
| 3/20/2017 12:43 | 6.6 | 6.3  | 11.2 | 106.3 | 111.211 | 5.92  |
| 3/20/2017 12:44 | 6.6 | 11.8 | 8.1  | 75.6  | 65.715  | 3.37  |
| 3/20/2017 12:45 | 6.3 | 9.3  | 11.7 | 99.3  | 72.652  | 4.86  |
| 3/20/2017 12:46 | 7.3 | 15.1 | 10.5 | 63    | 39.409  | 7.5   |
| 3/20/2017 12:47 | 8.1 | 12.8 | 7.6  | 69.3  | 50.13   | 6.53  |

|                 |      |      |      |       |         |       |
|-----------------|------|------|------|-------|---------|-------|
| 3/20/2017 12:48 | 8.9  | 14.1 | 8.5  | 58.5  | 32.652  | 10.57 |
| 3/20/2017 12:49 | 8.7  | 10   | 7.4  | 77.3  | 65.445  | 3.47  |
| 3/20/2017 12:50 | 7.6  | 8.7  | 8.8  | 88.5  | 92.652  | 4.22  |
| 3/20/2017 12:51 | 6.8  | 12.8 | 9.3  | 76.4  | 58.418  | 3.59  |
| 3/20/2017 12:52 | 7.5  | 16.3 | 9    | 55.2  | 43.283  | 2.08  |
| 3/20/2017 12:53 | 9.3  | 15.7 | 9.1  | 52.6  | 37.157  | 2.09  |
| 3/20/2017 12:54 | 11   | 17.9 | 13.2 | 52.9  | 38.778  | 8.4   |
| 3/20/2017 12:55 | 10.9 | 12.3 | 11.8 | 54.6  | 44.004  | 19.24 |
| 3/20/2017 12:56 | 9.7  | 10.3 | 9.9  | 70.5  | 71.481  | 3.59  |
| 3/20/2017 12:57 | 7.5  | 7.4  | 11.3 | 102.2 | 99.679  | 6.04  |
| 3/20/2017 12:58 | 6.4  | 12.1 | 11.6 | 67.3  | 60.13   | 3.79  |
| 3/20/2017 12:59 | 7.1  | 13.1 | 11.3 | 72    | 66.076  | 3.61  |
| 3/20/2017 13:00 | 8.1  | 9.5  | 11.3 | 82.2  | 86.256  | 7.5   |
| 3/20/2017 13:01 | 9.8  | 21   | 14.5 | 51.2  | 16.616  | 3.11  |
| 3/20/2017 13:02 | 11.8 | 22.2 | 14.8 | 44.8  | 20.941  | 1.01  |
| 3/20/2017 13:03 | 14.2 | 22   | 15.6 | 51.3  | 17.247  | 3.32  |
| 3/20/2017 13:04 | 15.5 | 21.8 | 16.8 | 50    | 16.166  | 2.37  |
| 3/20/2017 13:05 | 15.6 | 22.4 | 15.1 | 45.4  | 12.562  | 0.82  |
| 3/20/2017 13:06 | 15.6 | 21.1 | 14.6 | 55    | 24.995  | 1.6   |
| 3/20/2017 13:07 | 14.5 | 16.4 | 13   | 56.8  | 38.959  | 2.52  |
| 3/20/2017 13:08 | 12.9 | 15.5 | 13.8 | 66    | 35.445  | 2.45  |
| 3/20/2017 13:09 | 12.1 | 19.2 | 15.5 | 62.6  | 51.661  | 1.44  |
| 3/20/2017 13:10 | 11.9 | 16.8 | 17   | 82.9  | 74.724  | 2.9   |
| 3/20/2017 13:11 | 11.4 | 14.5 | 14.7 | 85.3  | 78.868  | 3.59  |
| 3/20/2017 13:12 | 9.5  | 10   | 21.5 | 143.7 | 140.67  | 6.45  |
| 3/20/2017 13:13 | 9.2  | 14.9 | 16.5 | 75.5  | 52.292  | 2.97  |
| 3/20/2017 13:14 | 9.2  | 13   | 14.3 | 67.4  | 49.319  | 3.04  |
| 3/20/2017 13:15 | 9.6  | 10.1 | 16   | 100.1 | 101.121 | 4.73  |
| 3/20/2017 13:16 | 7.7  | 9    | 16.9 | 114.8 | 116.616 | 6.66  |
| 3/20/2017 13:17 | 6.6  | 10.9 | 15.8 | 118.6 | 121.571 | 6.54  |
| 3/20/2017 13:18 | 6    | 11.2 | 15   | 93.6  | 92.652  | 5.37  |
| 3/20/2017 13:19 | 6.9  | 10.8 | 13.3 | 87.8  | 87.607  | 4.04  |
| 3/20/2017 13:20 | 6.4  | 8    | 15.2 | 124.4 | 143.283 | 6.73  |
| 3/20/2017 13:21 | 4.9  | 7.4  | 20.6 | 149.1 | 156.977 | 11.33 |
| 3/20/2017 13:22 | 3.4  | 8    | 23.5 | 175.8 | 174.814 | 12.17 |
| 3/20/2017 13:23 | 3.4  | 7.4  | 18.4 | 136.8 | 133.733 | 8.81  |
| 3/20/2017 13:24 | 4    | 9.3  | 20.5 | 143.1 | 136.526 | 9.09  |
| 3/20/2017 13:25 | 4.1  | 5.5  | 26.3 | 185.8 | 158.598 | 12.46 |
| 3/20/2017 13:26 | 3.5  | 4.7  | 25.6 | 183.6 | 161.841 | 13.8  |
| 3/20/2017 13:27 | 4.1  | 10.5 | 14.2 | 100.3 | 86.346  | 6.1   |
| 3/20/2017 13:28 | 4.8  | 7.9  | 16.4 | 120.3 | 101.301 | 7.26  |
| 3/20/2017 13:29 | 5.2  | 7.1  | 18.3 | 136.1 | 143.013 | 8.13  |
| 3/20/2017 13:30 | 4.9  | 8    | 16.5 | 123.1 | 118.598 | 7.15  |
| 3/20/2017 13:31 | 6.2  | 16.5 | 20.3 | 113.1 | 69.049  | 4.87  |

|                 |      |      |      |       |         |       |
|-----------------|------|------|------|-------|---------|-------|
| 3/20/2017 13:32 | 8    | 13.4 | 24.8 | 155.4 | 85.895  | 6.74  |
| 3/20/2017 13:33 | 10.3 | 17.3 | 19   | 90    | 42.923  | 4.27  |
| 3/20/2017 13:34 | 10.5 | 10.9 | 16.2 | 93.7  | 71.751  | 4.39  |
| 3/20/2017 13:35 | 8.5  | 6.9  | 19.8 | 146.1 | 122.112 | 9.2   |
| 3/20/2017 13:36 | 6.2  | 7.2  | 17.4 | 120.2 | 102.112 | 9.23  |
| 3/20/2017 13:37 | 4.7  | 8.9  | 14.9 | 99.2  | 84.094  | 6.41  |
| 3/20/2017 13:38 | 5.4  | 8.9  | 13   | 91.5  | 83.643  | 5.68  |
| 3/20/2017 13:39 | 5.5  | 7.3  | 14.3 | 110.7 | 118.328 | 5.95  |
| 3/20/2017 13:40 | 4.7  | 6.8  | 17.7 | 137.7 | 106.346 | 7.92  |
| 3/20/2017 13:41 | 5.3  | 11.5 | 19.4 | 118.6 | 58.328  | 5.76  |
| 3/20/2017 13:42 | 5.5  | 6.9  | 18   | 140.5 | 140.85  | 8.34  |
| 3/20/2017 13:43 | 5.4  | 5.3  | 15.5 | 122.1 | 123.914 | 8.32  |
| 3/20/2017 13:44 | 4.3  | 7.1  | 15.2 | 109.8 | 113.463 | 7.45  |
| 3/20/2017 13:45 | 4.3  | 9.9  | 16.3 | 125.6 | 128.778 | 7.16  |
| 3/20/2017 13:46 | 5.9  | 13.4 | 21.6 | 121.9 | 63.553  | 7.72  |
| 3/20/2017 13:47 | 8.7  | 20.2 | 19.1 | 82.9  | 21.481  | 3.31  |
| 3/20/2017 13:48 | 12.2 | 21.8 | 19.3 | 72.1  | 13.553  | 2.17  |
| 3/20/2017 13:49 | 15   | 21.2 | 19.8 | 67.6  | 12.022  | 1.95  |
| 3/20/2017 13:50 | 15.9 | 23.1 | 19   | 77.4  | 12.382  | 2.01  |
| 3/20/2017 13:51 | 15.5 | 18.2 | 19.1 | 104.7 | 57.157  | 4.04  |
| 3/20/2017 13:52 | 14.1 | 18.8 | 22.6 | 112.4 | 55.265  | 5.45  |
| 3/20/2017 13:53 | 13.7 | 21.3 | 21.3 | 88.4  | 38.058  | 3.45  |
| 3/20/2017 13:54 | 12.8 | 12.3 | 20.7 | 127.5 | 76.616  | 5.47  |
| 3/20/2017 13:55 | 12.1 | 15.7 | 18   | 90.1  | 53.373  | 5.06  |
| 3/20/2017 13:56 | 10.1 | 9.6  | 16.3 | 125.8 | 126.706 | 6.23  |
| 3/20/2017 13:57 | 7.3  | 3.6  | 20.4 | 179.5 | 163.193 | 10.82 |
| 3/20/2017 13:58 | 5.6  | 8.7  | 12.6 | 99.7  | 106.076 | 7.74  |
| 3/20/2017 13:59 | 4.6  | 10.3 | 14.3 | 114   | 112.292 | 6.63  |
| 3/20/2017 14:00 | 5.5  | 8.7  | 15.8 | 120.1 | 113.193 | 7.49  |
| 3/20/2017 14:01 | 6    | 10   | 15.2 | 122.5 | 110.67  | 6.82  |
| 3/20/2017 14:02 | 6.6  | 13.3 | 16.8 | 117.2 | 104.364 | 6.48  |
| 3/20/2017 14:03 | 7.2  | 9.6  | 15.6 | 115.4 | 106.706 | 6.05  |
| 3/20/2017 14:04 | 7.2  | 9.3  | 12.6 | 103.5 | 104.094 | 6.26  |
| 3/20/2017 14:05 | 6.6  | 10   | 16.6 | 139.5 | 116.977 | 6.88  |
| 3/20/2017 14:06 | 6.2  | 12.2 | 15.1 | 102   | 78.058  | 5.69  |
| 3/20/2017 14:07 | 6.6  | 9    | 16.4 | 118   | 99.95   | 5.79  |
| 3/20/2017 14:08 | 6.6  | 7.2  | 17   | 127.9 | 128.778 | 7.11  |
| 3/20/2017 14:09 | 6.2  | 9.2  | 15.4 | 124.5 | 142.562 | 6.66  |
| 3/20/2017 14:10 | 5.8  | 9.9  | 18.3 | 121.6 | 127.517 | 6.98  |
| 3/20/2017 14:11 | 7.6  | 15.1 | 19.8 | 117.1 | 65.085  | 5.86  |
| 3/20/2017 14:12 | 8.7  | 9.7  | 18.5 | 132.9 | 94.094  | 6.62  |
| 3/20/2017 14:13 | 9.8  | 18.2 | 17.3 | 97.2  | 60.76   | 4.34  |
| 3/20/2017 14:14 | 10.6 | 20.4 | 20.6 | 95.8  | 55.625  | 3.93  |
| 3/20/2017 14:15 | 10.5 | 19.5 | 32.6 | 307.8 | 129.859 | 13.63 |

|                 |      |      |      |       |         |       |
|-----------------|------|------|------|-------|---------|-------|
| 3/20/2017 14:16 | 9.9  | 12   | 38   | 323.3 | 94.724  | 15.98 |
| 3/20/2017 14:17 | 8.2  | 6.6  | 30.1 | 241   | 89.499  | 14.21 |
| 3/20/2017 14:18 | 6.9  | 14.2 | 39.3 | 368.7 | 141.571 | 21.06 |
| 3/20/2017 14:19 | 5.7  | 7    | 41.3 | 329.4 | 161.121 | 22.47 |
| 3/20/2017 14:20 | 4.8  | 6    | 34.8 | 300.9 | 126.706 | 16.25 |
| 3/20/2017 14:21 | 4.9  | 13   | 49.1 | 412.3 | 135.895 | 25.59 |
| 3/20/2017 14:22 | 5.6  | 10.2 | 37.8 | 341.9 | 95.175  | 19.32 |
| 3/20/2017 14:23 | 6.3  | 19.3 | 30   | 268.2 | 98.058  | 14.31 |
| 3/20/2017 14:24 | 7.7  | 15.4 | 26.7 | 210.4 | 85.986  | 10.19 |
| 3/20/2017 14:25 | 9.2  | 19.6 | 26.3 | 197.9 | 84.544  | 9.27  |
| 3/20/2017 14:26 | 9.4  | 12.3 | 28.1 | 232.1 | 76.796  | 13.36 |
| 3/20/2017 14:27 | 9    | 9.9  | 19.8 | 151.7 | 106.256 | 7.87  |
| 3/20/2017 14:28 | 7.7  | 13.3 | 24.2 | 216.2 | 126.436 | 11.81 |
| 3/20/2017 14:29 | 7.5  | 7.2  | 20.5 | 179.8 | 103.733 | 8.97  |
| 3/20/2017 14:30 | 7.4  | 20.7 | 24.3 | 190   | 67.787  | 9.56  |
| 3/20/2017 14:31 | 8.9  | 21.3 | 31.1 | 286   | 71.301  | 14.31 |
| 3/20/2017 14:32 | 9.3  | 11   | 27.3 | 204.6 | 71.751  | 12.59 |
| 3/20/2017 14:33 | 9.5  | 10   | 27.3 | 200.1 | 112.112 | 10.86 |
| 3/20/2017 14:34 | 9.6  | 19   | 25.8 | 226.2 | 72.832  | 10.41 |
| 3/20/2017 14:35 | 8.9  | 2.7  | 29   | 233   | 121.121 | 13.18 |
| 3/20/2017 14:36 | 9    | 15.6 | 25.6 | 185.5 | 76.616  | 9.9   |
| 3/20/2017 14:37 | 9.3  | 14.6 | 29.9 | 240   | 81.841  | 11.95 |
| 3/20/2017 14:38 | 10.2 | 15.2 | 25.6 | 203.6 | 71.661  | 9.42  |
| 3/20/2017 14:39 | 10.8 | 14.2 | 19.9 | 110.5 | 45.895  | 8.19  |
| 3/20/2017 14:40 | 11.2 | 20.6 | 23.6 | 175.1 | 85.355  | 7.31  |
| 3/20/2017 14:41 | 10.7 | 12.1 | 20.5 | 133.2 | 52.382  | 9.6   |
| 3/20/2017 14:42 | 12.3 | 22.5 | 18.4 | 104.6 | 39.049  | 3.49  |
| 3/20/2017 14:43 | 11.7 | 13.4 | 23.5 | 163.3 | 67.877  | 9.25  |
| 3/20/2017 14:44 | 12.9 | 21   | 17.9 | 76.9  | 31.301  | 3.36  |
| 3/20/2017 14:45 | 13.3 | 21.1 | 17.9 | 68.7  | 28.418  | 1.87  |
| 3/20/2017 14:46 | 14.6 | 24.3 | 20.4 | 112   | 45.265  | 4.14  |
| 3/20/2017 14:47 | 14.1 | 17.3 | 25.7 | 191.4 | 83.103  | 9.35  |
| 3/20/2017 14:48 | 12.9 | 18.1 | 21.5 | 129.9 | 45.355  | 7.25  |
| 3/20/2017 14:49 | 12.2 | 19.6 | 23.6 | 133.2 | 52.292  | 6.37  |
| 3/20/2017 14:50 | 12.7 | 21.3 | 24.5 | 144.5 | 57.877  | 6.84  |
| 3/20/2017 14:51 | 12.3 | 14.4 | 31.3 | 221.2 | 89.229  | 11.02 |
| 3/20/2017 14:52 | 12.2 | 16.5 | 25.6 | 145.8 | 49.679  | 7.77  |
| 3/20/2017 14:53 | 12.3 | 16.9 | 24.7 | 140.4 | 56.706  | 7.02  |
| 3/20/2017 14:54 | 13.4 | 22.8 | 24.3 | 119.2 | 31.841  | 6.18  |
| 3/20/2017 14:55 | 14.1 | 18.6 | 22.9 | 125.4 | 37.427  | 5.45  |
| 3/20/2017 14:56 | 14.7 | 22.5 | 26.2 | 159.6 | 52.202  | 7.21  |
| 3/20/2017 14:57 | 14.3 | 17.2 | 29   | 185.9 | 53.103  | 10.1  |
| 3/20/2017 14:58 | 13.8 | 28.8 | 34.6 | 241.8 | 79.589  | 10.83 |
| 3/20/2017 14:59 | 12.9 | 18.5 | 34.2 | 228.8 | 76.166  | 12.81 |

|                 |      |      |      |       |        |       |
|-----------------|------|------|------|-------|--------|-------|
| 3/20/2017 15:00 | 12.9 | 17.4 | 29.4 | 200.7 | 63.283 | 10.55 |
| 3/20/2017 15:01 | 13.4 | 20.8 | 22.7 | 123.7 | 50.76  | 5.8   |
| 3/20/2017 15:02 | 14.2 | 25.6 | 22.7 | 121.1 | 54.094 | 5.28  |
| 3/20/2017 15:03 | 15.1 | 21.5 | 26.1 | 119.1 | 47.607 | 5.31  |
| 3/20/2017 15:04 | 16.3 | 25.5 | 21.5 | 63.4  | 12.112 | 2.12  |
| 3/20/2017 15:05 | 18.4 | 28.8 | 21.2 | 44.1  | 6.526  | 0.24  |
| 3/20/2017 15:06 | 20.6 | 29.9 | 21.8 | 40.9  | 4.814  | 0.06  |
| 3/20/2017 15:07 | 21.6 | 27.6 | 23.1 | 66.7  | 12.923 | 1.22  |
| 3/20/2017 15:08 | 21.4 | 28.2 | 21.3 | 50.6  | 11.301 | 0.93  |
| 3/20/2017 15:09 | 21.9 | 31.5 | 24   | 46.8  | 7.427  | 0.31  |
| 3/20/2017 15:10 | 22.4 | 29.6 | 23.4 | 46.1  | 6.256  | 0.32  |
| 3/20/2017 15:11 | 22.3 | 25.8 | 23.7 | 60.5  | 6.346  | 1.51  |
| 3/20/2017 15:12 | 20.6 | 20.8 | 24.8 | 85.1  | 59.409 | 3.01  |
| 3/20/2017 15:13 | 19   | 28   | 23.4 | 62.3  | 15.895 | 1.71  |
| 3/20/2017 15:14 | 19.2 | 26.6 | 21.5 | 57.4  | 10.58  | 0.96  |
| 3/20/2017 15:15 | 19.6 | 24.9 | 23.4 | 84.5  | 46.256 | 2.37  |
| 3/20/2017 15:16 | 18.9 | 22.9 | 26.9 | 109.8 | 65.265 | 3.79  |
| 3/20/2017 15:17 | 17.1 | 21.8 | 26.3 | 109.6 | 48.688 | 4.34  |
| 3/20/2017 15:18 | 15.2 | 17.4 | 24.8 | 122.1 | 57.337 | 5.14  |
| 3/20/2017 15:19 | 14.7 | 18.3 | 22.2 | 86.9  | 23.193 | 3.39  |
| 3/20/2017 15:20 | 15   | 22.2 | 21.8 | 67.8  | 14.544 | 2.34  |
| 3/20/2017 15:21 | 17.4 | 28   | 22.7 | 43.5  | 5.175  | 0.34  |
| 3/20/2017 15:22 | 20.4 | 30.7 | 24.6 | 41.5  | 4.184  | 0.1   |
| 3/20/2017 15:23 | 23.2 | 32.9 | 26.3 | 41    | 3.193  | -0.03 |
| 3/20/2017 15:24 | 24.8 | 32.5 | 25.9 | 40.3  | 3.013  | -0.04 |
| 3/20/2017 15:25 | 25.6 | 33.2 | 26.7 | 42.1  | 2.832  | -0.05 |
| 3/20/2017 15:26 | 25.9 | 32.5 | 28.4 | 41.9  | 2.742  | -0.04 |
| 3/20/2017 15:27 | 26.1 | 33.4 | 27.8 | 41.4  | 2.652  | -0.05 |
| 3/20/2017 15:28 | 25.9 | 31.1 | 27.3 | 41    | 2.562  | -0.01 |
| 3/20/2017 15:29 | 25.2 | 28.7 | 25.2 | 39    | 2.832  | 0.69  |
| 3/20/2017 15:30 | 24.6 | 32.4 | 26.5 | 40.8  | 2.652  | -0.02 |
| 3/20/2017 15:31 | 24.5 | 31   | 26.8 | 40.3  | 2.472  | -0.02 |
| 3/20/2017 15:32 | 24.8 | 30.4 | 25.4 | 39.9  | 2.472  | 0     |
| 3/20/2017 15:33 | 24.6 | 29.5 | 24.6 | 38.9  | 2.742  | 0.12  |
| 3/20/2017 15:34 | 24.8 | 33.6 | 27.4 | 41.9  | 3.553  | 2.95  |
| 3/20/2017 15:35 | 25.9 | 35.1 | 29.4 | 42.7  | 2.472  | 0.12  |
| 3/20/2017 15:36 | 27.2 | 32.2 | 28.7 | 42.2  | 2.382  | 0.11  |
| 3/20/2017 15:37 | 27.5 | 33.4 | 29.5 | 42.1  | 2.562  | 0.06  |
| 3/20/2017 15:38 | 27.4 | 32.5 | 29.8 | 43    | 2.652  | 0.26  |
| 3/20/2017 15:39 | 27.7 | 36.2 | 31.5 | 44.4  | 2.562  | 0.03  |
| 3/20/2017 15:40 | 28.3 | 35.4 | 30.9 | 44.5  | 2.562  | -0.04 |
| 3/20/2017 15:41 | 29   | 35.8 | 29.9 | 44.7  | 2.652  | -0.05 |
| 3/20/2017 15:42 | 29.2 | 35.2 | 30   | 45.1  | 2.652  | -0.05 |
| 3/20/2017 15:43 | 29.2 | 35.4 | 29.2 | 45.6  | 2.562  | -0.06 |

|                 |      |      |      |      |       |       |
|-----------------|------|------|------|------|-------|-------|
| 3/20/2017 15:44 | 29.4 | 37.1 | 30.1 | 46.1 | 2.562 | -0.07 |
| 3/20/2017 15:45 | 29.8 | 36.4 | 31.4 | 46.9 | 2.562 | -0.06 |
| 3/20/2017 15:46 | 30   | 36.1 | 31.1 | 45.9 | 2.562 | -0.08 |
| 3/20/2017 15:47 | 29.9 | 35.4 | 31.4 | 45.5 | 2.562 | -0.07 |
| 3/20/2017 15:48 | 29.8 | 38   | 32.5 | 47.3 | 2.562 | -0.09 |
| 3/20/2017 15:49 | 30.3 | 38.6 | 32.8 | 48.5 | 2.652 | -0.08 |
| 3/20/2017 15:50 | 31.2 | 38.5 | 32.6 | 48.6 | 2.652 | -0.09 |
| 3/20/2017 15:51 | 31.5 | 37.1 | 32.2 | 48.3 | 2.742 | -0.07 |
| 3/20/2017 15:52 | 31.5 | 37.8 | 33   | 48.8 | 2.832 | -0.07 |
| 3/20/2017 15:53 | 31.2 | 37.8 | 33.3 | 49.2 | 2.832 | -0.06 |
| 3/20/2017 15:54 | 31.2 | 38   | 34.4 | 49.2 | 2.832 | -0.05 |
| 3/20/2017 15:55 | 31.3 | 36.5 | 33.7 | 48.5 | 2.832 | -0.06 |
| 3/20/2017 15:56 | 31.1 | 37.4 | 32   | 48.7 | 2.923 | -0.05 |
| 3/20/2017 15:57 | 31.5 | 39.6 | 33.6 | 50.6 | 2.832 | -0.07 |
| 3/20/2017 15:58 | 31.9 | 38.8 | 35.3 | 50.8 | 2.923 | -0.05 |
| 3/20/2017 15:59 | 32   | 36   | 33.9 | 49.2 | 3.013 | -0.05 |
| 3/20/2017 16:00 | 31.4 | 37.8 | 33.5 | 49.9 | 3.193 | -0.03 |
| 3/20/2017 16:01 | 31.5 | 41   | 35.5 | 53.2 | 3.103 | -0.05 |
| 3/20/2017 16:02 | 32.4 | 39.9 | 36   | 53.2 | 3.103 | -0.04 |
| 3/20/2017 16:03 | 33.3 | 39.3 | 34.4 | 53   | 3.013 | -0.05 |
| 3/20/2017 16:04 | 33.4 | 39.1 | 35.2 | 53.1 | 3.103 | -0.05 |
| 3/20/2017 16:05 | 33.1 | 39.2 | 34.7 | 51.7 | 3.103 | -0.04 |
| 3/20/2017 16:06 | 32.8 | 38.3 | 33.9 | 51.2 | 3.103 | -0.04 |
| 3/20/2017 16:07 | 32.5 | 39.1 | 34.6 | 51.5 | 3.103 | -0.05 |
| 3/20/2017 16:08 | 32.3 | 38.4 | 34.1 | 51.7 | 3.283 | -0.05 |
| 3/20/2017 16:09 | 32.4 | 39.7 | 35.8 | 53.3 | 3.373 | -0.04 |
| 3/20/2017 16:10 | 32.2 | 37.5 | 33.5 | 51.2 | 3.463 | -0.04 |
| 3/20/2017 16:11 | 31.5 | 35.4 | 32   | 50.7 | 3.463 | -0.03 |
| 3/20/2017 16:12 | 30.8 | 37.1 | 32.6 | 51.3 | 3.463 | -0.03 |
| 3/20/2017 16:13 | 31.4 | 40.5 | 35.4 | 54   | 3.103 | -0.04 |
| 3/20/2017 16:14 | 32.5 | 39.1 | 36   | 53.8 | 3.013 | -0.04 |
| 3/20/2017 16:15 | 33.1 | 39.6 | 34   | 53.5 | 3.103 | -0.05 |
| 3/20/2017 16:16 | 33   | 39.8 | 35.2 | 54.4 | 3.013 | -0.04 |
| 3/20/2017 16:17 | 32.9 | 39.6 | 35.8 | 54.3 | 3.013 | -0.02 |
| 3/20/2017 16:18 | 33.3 | 39.7 | 34.1 | 54.8 | 3.013 | 0.01  |
| 3/20/2017 16:19 | 33.7 | 41.8 | 36.7 | 56   | 2.923 | -0.04 |
| 3/20/2017 16:20 | 33.9 | 40.6 | 36.2 | 54.8 | 2.923 | -0.03 |
| 3/20/2017 16:21 | 34.1 | 40.1 | 34.6 | 54.5 | 2.742 | -0.03 |
| 3/20/2017 16:22 | 34.1 | 41.9 | 35.8 | 55.6 | 2.652 | -0.05 |
| 3/20/2017 16:23 | 35   | 46.5 | 34.2 | 60.2 | 2.562 | -0.05 |
| 3/20/2017 16:24 | 36.3 | 42.6 | 38   | 56.6 | 2.652 | -0.05 |
| 3/20/2017 16:25 | 36.5 | 42.7 | 36   | 54   | 2.562 | -0.05 |
| 3/20/2017 16:26 | 37.2 | 46.3 | 25.6 | 58.4 | 2.562 | -0.06 |
| 3/20/2017 16:27 | 33.1 | 13.4 | 11   | -6.6 | 2.562 | -0.04 |



Sycan Marsh October 2017

| Date&Time           | O3 NO-CL | O3 UV-C-H | O3 UV-C | NO2-C | CO     | THC |
|---------------------|----------|-----------|---------|-------|--------|-----|
| 10/11/2017 11:00 AM |          |           |         |       |        |     |
| 10/11/2017 11:01 AM |          |           |         |       |        |     |
| 10/11/2017 11:02 AM |          |           |         |       |        |     |
| 10/11/2017 11:03 AM |          |           |         |       |        |     |
| 10/11/2017 11:04 AM |          |           |         |       |        |     |
| 10/11/2017 11:05 AM |          |           |         |       |        |     |
| 10/11/2017 11:06 AM |          |           |         |       |        |     |
| 10/11/2017 11:07 AM |          |           |         |       |        |     |
| 10/11/2017 11:08 AM |          |           |         |       |        |     |
| 10/11/2017 11:09 AM |          |           |         |       |        |     |
| 10/11/2017 11:10 AM |          |           |         |       |        |     |
| 10/11/2017 11:11 AM |          |           |         |       |        |     |
| 10/11/2017 11:12 AM |          |           |         |       |        |     |
| 10/11/2017 11:13 AM |          |           |         |       |        |     |
| 10/11/2017 11:14 AM |          |           |         |       |        |     |
| 10/11/2017 11:15 AM |          |           |         |       |        |     |
| 10/11/2017 11:16 AM |          |           |         |       |        |     |
| 10/11/2017 11:17 AM |          |           |         |       |        |     |
| 10/11/2017 11:18 AM |          |           |         |       |        |     |
| 10/11/2017 11:19 AM |          |           |         |       |        |     |
| 10/11/2017 11:20 AM |          |           |         |       |        |     |
| 10/11/2017 11:21 AM |          |           |         |       |        |     |
| 10/11/2017 11:22 AM |          |           |         |       |        |     |
| 10/11/2017 11:23 AM | 0.5      | 33.9      | 36.1    | 0.6   | 2.8183 |     |
| 10/11/2017 11:24 AM | 0.3      | 33.5      | 36.6    | 2.3   | 2.416  |     |
| 10/11/2017 11:25 AM | 0.3      | 34.3      | 37.3    | 0.1   | 1.1891 |     |
| 10/11/2017 11:26 AM | 0.2      | 34.4      | 37.1    | -0.2  | 1.1347 |     |
| 10/11/2017 11:27 AM | 0.3      | 29.2      | 34.6    | 3.6   | 2.2095 |     |
| 10/11/2017 11:28 AM | 0.2      | 32.3      | 36      | 1.1   | 2.4692 |     |
| 10/11/2017 11:29 AM | 0.1      | 30.1      | 33.9    | 2.7   | 3.2681 |     |
| 10/11/2017 11:30 AM | 0        | 31.2      | 33.9    | 6.2   | 3.0266 |     |
| 10/11/2017 11:31 AM | 0        | 32.5      | 36      | 3.4   | 1.3601 |     |
| 10/11/2017 11:32 AM | 0        | 33.5      | 36.4    | 0.2   | 1.564  |     |
| 10/11/2017 11:33 AM | -0.1     | 28.7      | 32.2    | 0     | 1.1725 |     |
| 10/11/2017 11:34 AM | 1.8      | 23.9      | 25.4    | 0     | 1.2848 |     |
| 10/11/2017 11:35 AM | 9.9      | 33        | 36.4    | 0.1   | 1.1489 |     |
| 10/11/2017 11:36 AM | 19.9     | 31.6      | 32.9    | 6.6   | 1.1559 |     |
| 10/11/2017 11:37 AM | 28.4     | 30.8      | 34.8    | 6.6   | 1.1693 |     |
| 10/11/2017 11:38 AM | 29.2     | 28.4      | 31.2    | 10.8  | 1.2138 |     |
| 10/11/2017 11:39 AM | 28.6     | 31.9      | 34      | 7.8   | 1.1735 |     |
| 10/11/2017 11:40 AM | 29       | 32.2      | 35.7    | 2.6   | 1.1578 |     |
| 10/11/2017 11:41 AM | 29.3     | 24.9      | 28.2    | 17.3  | 1.2497 |     |
| 10/11/2017 11:42 AM | 26.8     | 23.4      | 26.6    | 21.9  | 1.2893 |     |
| 10/11/2017 11:43 AM | 25.4     | 33.8      | 35.1    | 3.4   | 1.2222 |     |
| 10/11/2017 11:44 AM | 27.1     | 32.1      | 35.3    | 1.7   | 1.2234 |     |

|                     |      |       |        |       |          |
|---------------------|------|-------|--------|-------|----------|
| 10/11/2017 11:45 AM | 31.3 | 34.7  | 36.4   | 1.9   | 1.4073   |
| 10/11/2017 11:46 AM | 30.9 | 51    | 128.3  | 143.6 | 4.9936   |
| 10/11/2017 11:47 AM | 21.5 | 245.8 | 2055.7 | 766   | 77.7558  |
| 10/11/2017 11:48 AM | 10.5 | 326.9 | 3246   | 934   | 136.5833 |
| 10/11/2017 11:49 AM | 1.7  | 165   | 2113.8 | 446   | 87.8125  |
| 10/11/2017 11:50 AM | 0.1  | 39    | 618.7  | 100.1 | 19.85    |
| 10/11/2017 11:51 AM | 0.9  | 25.2  | 321.7  | 64.4  | 7.1284   |
| 10/11/2017 11:52 AM | 1.7  | 43.9  | 460.1  | 130.6 | 14.0049  |
| 10/11/2017 11:53 AM | 2.6  | 12.1  | 131.2  | 32.8  | 4.4147   |
| 10/11/2017 11:54 AM | 3.3  | 8.6   |        |       |          |
| 10/11/2017 11:55 AM |      |       |        |       |          |
| 10/11/2017 11:56 AM | 5.7  | 10    | 14.9   | 11.4  | 3.4701   |
| 10/11/2017 11:57 AM | 6.8  | 13.7  | 23.9   | 9.4   | 1.8881   |
| 10/11/2017 11:58 AM | 8    | 12.2  | 14.1   | 7.6   | 1.519    |
| 10/11/2017 11:59 AM |      |       |        |       |          |
| 10/11/2017 12:00 PM | 9.6  | 13.3  | 12     | 5.5   | 1.2752   |
| 10/11/2017 12:01 PM | 10.3 | 16.9  | 17.4   | 13.6  | 1.4731   |
| 10/11/2017 12:02 PM | 9.8  | 24.8  | 131.6  | 96.7  | 6.6728   |
| 10/11/2017 12:03 PM | 7.8  | 25.2  | 197.1  | 122.6 | 9.5108   |
| 10/11/2017 12:04 PM | 5.8  | 33.1  | 237.8  | 121.8 | 10.3646  |
| 10/11/2017 12:05 PM | 4.5  | 31.6  | 222.5  | 113.8 | 9.5393   |
| 10/11/2017 12:06 PM | 4.3  | 36.4  | 309.5  | 132.9 | 13.3217  |
| 10/11/2017 12:07 PM | 4    | 26.3  | 206.7  | 90.5  | 8.2848   |
| 10/11/2017 12:08 PM | 4    | 22.3  | 184.6  | 82    | 7.5048   |
| 10/11/2017 12:09 PM | 4.3  | 22.5  | 159.4  | 65.7  | 6.4805   |
| 10/11/2017 12:10 PM | 5    | 18.5  | 102.4  | 39.6  | 4.3428   |
| 10/11/2017 12:11 PM | 6.3  | 21.6  | 92.5   | 38.8  | 3.4236   |
| 10/11/2017 12:12 PM | 6.4  | 31.2  | 243.2  | 98    | 9.5188   |
| 10/11/2017 12:13 PM | 5.7  | 26    | 212.1  | 79.4  | 8.2818   |
| 10/11/2017 12:14 PM | 5    | 19.2  | 117.5  | 41.7  | 4.6045   |
| 10/11/2017 12:15 PM | 6    | 14.4  | 61.6   | 18.5  | 2.444    |
| 10/11/2017 12:16 PM | 7.7  | 15.7  | 53.7   | 20.1  | 2.5137   |
| 10/11/2017 12:17 PM | 9.1  | 14.2  | 41.6   | 14.9  | 1.9327   |
| 10/11/2017 12:18 PM | 9.7  | 16.9  | 49.8   | 18.9  | 2.59     |
| 10/11/2017 12:19 PM | 9.5  | 18.9  | 69.1   | 34.2  | 3.5635   |
| 10/11/2017 12:20 PM | 8.8  | 19.9  | 72.5   | 47.1  | 4.2318   |
| 10/11/2017 12:21 PM | 8.3  | 18    | 68.7   | 43.4  | 3.6713   |
| 10/11/2017 12:22 PM | 7.9  | 29.4  | 178.2  | 89.7  | 8.1842   |
| 10/11/2017 12:23 PM | 7.1  | 31.9  | 217.4  | 79.9  | 10.2964  |
| 10/11/2017 12:24 PM | 6.5  | 20.7  | 110.9  | 35.5  | 4.5813   |
| 10/11/2017 12:25 PM | 5.8  | 42.4  | 349.4  | 141.8 | 13.6263  |
| 10/11/2017 12:26 PM | 4.8  | 49.4  | 402.9  | 146.6 | 17.4133  |
| 10/11/2017 12:27 PM | 3.7  | 25.4  | 194.7  | 81.1  | 10.1483  |
| 10/11/2017 12:28 PM | 3.4  | 26.6  | 198.9  | 106.7 | 8.4143   |
| 10/11/2017 12:29 PM | 3.9  | 28    | 209.2  | 100.9 | 9.661    |
| 10/11/2017 12:30 PM | 3.7  | 34.1  | 276.9  | 144   | 13.6092  |
| 10/11/2017 12:31 PM | 3.2  | 27    | 211.1  | 99.8  | 11.1924  |

|                     |      |      |       |       |         |     |
|---------------------|------|------|-------|-------|---------|-----|
| 10/11/2017 12:32 PM | 3.5  | 19.2 | 125.9 | 60.9  | 6.0871  |     |
| 10/11/2017 12:33 PM | 4.1  | 27.1 | 202.3 | 80.3  | 9.0158  |     |
| 10/11/2017 12:34 PM | 4.7  | 19.4 | 140   | 57    | 6.4057  |     |
| 10/11/2017 12:35 PM | 5.4  | 17.4 | 103.7 | 50.5  | 4.5381  |     |
| 10/11/2017 12:36 PM | 6.3  | 16.2 | 72.9  | 32.3  | 3.5916  |     |
| 10/11/2017 12:37 PM | 7.3  | 17.4 | 71.9  | 27.5  | 3.2943  |     |
| 10/11/2017 12:38 PM | 7.5  | 17.7 | 91.1  | 65.7  | 4.3066  |     |
| 10/11/2017 12:39 PM | 7.2  | 28.1 | 166.9 | 101.9 | 7.0822  |     |
| 10/11/2017 12:40 PM | 6.6  | 26.3 | 178.5 | 83.4  | 7.888   |     |
| 10/11/2017 12:41 PM | 6.2  | 29.4 | 212.7 | 97.4  | 10.3983 |     |
| 10/11/2017 12:42 PM | 5.8  | 54.7 | 403.8 | 189.6 | 16.3577 |     |
| 10/11/2017 12:43 PM | 4.4  | 71.5 | 702.2 | 189.3 | 26.5842 |     |
| 10/11/2017 12:44 PM | 3.8  | 27.9 | 220.3 | 46.7  | 7.4525  |     |
| 10/11/2017 12:45 PM | 4    | 29.7 | 269.3 | 75.2  | 8.3148  |     |
| 10/11/2017 12:46 PM | 4.5  | 29.7 | 278.8 | 62.2  | 11.4478 |     |
| 10/11/2017 12:47 PM | 4.6  | 26.5 | 228   | 56.9  | 8.0989  |     |
| 10/11/2017 12:48 PM | 4.6  | 28.2 | 194.7 | 74.6  | 7.5148  |     |
| 10/11/2017 12:49 PM | 5.3  | 17.3 | 108.1 | 31.7  | 4.4514  |     |
| 10/11/2017 12:50 PM | 6.3  | 15.5 | 56.5  | 17.6  | 2.9852  |     |
| 10/11/2017 12:51 PM | 7.7  | 14.9 | 45.8  | 10.6  | 2.1508  |     |
| 10/11/2017 12:52 PM | 8.5  | 15.5 | 39.4  | 10.8  | 2.2286  |     |
| 10/11/2017 12:53 PM | 8.8  | 13.7 | 74.8  | 27.6  | 3.2973  |     |
| 10/11/2017 12:54 PM | 8.4  | 15.5 | 68    | 22.4  | 3.2766  |     |
| 10/11/2017 12:55 PM | 8.2  | 14   | 46.9  | 16.2  | 2.6874  |     |
| 10/11/2017 12:56 PM | 8.3  | 13.7 | 46.7  | 16.2  | 2.6742  |     |
| 10/11/2017 12:57 PM | 9    | 13.6 | 38.9  | 12.9  | 2.2578  |     |
| 10/11/2017 12:58 PM | 9.7  | 16   | 25.4  | 5.9   | 1.8139  |     |
| 10/11/2017 12:59 PM | 10.7 | 15.8 | 25.9  | 5     | 1.5759  |     |
| 10/11/2017 1:00 PM  | 11   | 15.8 | 33.3  | 6.1   | 2.0154  |     |
| 10/11/2017 1:01 PM  | 11   | 16.3 | 31.4  | 8.2   | 1.9621  |     |
| 10/11/2017 1:02 PM  | 10.9 | 17.1 | 28.3  | 9.4   | 1.7935  |     |
| 10/11/2017 1:03 PM  | 10.9 | 15   | 33.9  | 9.5   | 2.1345  |     |
| 10/11/2017 1:04 PM  | 11.1 | 14.5 | 23.6  | 6.4   | 1.7792  |     |
| 10/11/2017 1:05 PM  | 11.1 | 15.5 | 25.1  | 4.5   | 1.7657  |     |
| 10/11/2017 1:06 PM  | 11.4 | 17.5 | 24.6  | 3.6   | 1.8064  |     |
| 10/11/2017 1:07 PM  | 11.7 | 17.4 | 18.2  | 3.2   | 1.4803  |     |
| 10/11/2017 1:08 PM  | 11.4 | 18.3 | 42.3  | 16.8  | 3.7469  |     |
| 10/11/2017 1:09 PM  | 10.7 | 18   | 48.9  | 14.7  | 3.6977  |     |
| 10/11/2017 1:10 PM  | 10   | 16.5 | 38.8  | 10.1  | 1.9965  |     |
| 10/11/2017 1:11 PM  | 10.1 | 15   | 28.1  | 6.1   | 1.7436  | 7.8 |
| 10/11/2017 1:12 PM  | 10.3 | 17.1 | 46    | 7     | 2.681   | 8.1 |
| 10/11/2017 1:13 PM  | 10.2 | 22.5 | 115.2 | 8     | 5.4648  | 8.6 |
| 10/11/2017 1:14 PM  | 9.8  | 25.5 | 178.9 | 9.8   | 9.0407  | 8.3 |
| 10/11/2017 1:15 PM  | 9.9  | 21.4 | 149   | 8.3   | 6.8069  | 7.2 |
| 10/11/2017 1:16 PM  | 10.2 | 22.4 | 142.9 | 8.6   | 7.3873  | 7   |
| 10/11/2017 1:17 PM  | 10.6 | 23.2 | 161   | 8.7   | 8.8053  | 7.1 |
| 10/11/2017 1:18 PM  | 10.5 | 21.9 | 132.3 | 8.5   | 8.4585  | 6.8 |

|                    |      |      |      |     |        |     |
|--------------------|------|------|------|-----|--------|-----|
| 10/11/2017 1:19 PM | 10.8 | 19.5 | 87.5 | 6.7 | 5.4929 | 6.4 |
| 10/11/2017 1:20 PM | 11.2 | 19.5 | 52.8 | 6   | 5.2861 | 6.4 |
| 10/11/2017 1:21 PM | 11.8 | 20   | 59.5 | 5.3 | 4.9833 | 5.7 |
| 10/11/2017 1:22 PM | 11.9 | 21.4 | 80.7 | 6.2 | 6.6523 | 5.7 |
| 10/11/2017 1:23 PM | 12   | 20.7 | 57.2 | 5.7 | 4.9066 | 5.4 |
| 10/11/2017 1:24 PM | 12.2 | 21.5 | 62.5 | 5.5 | 5.2608 | 5.4 |
| 10/11/2017 1:25 PM | 12.6 | 18.7 | 41   | 4.7 | 3.8849 | 5.2 |
| 10/11/2017 1:26 PM | 13.1 | 18.7 | 43.2 | 4.5 | 4.0098 | 5.1 |
| 10/11/2017 1:27 PM | 13.1 | 21.6 | 77.7 | 5.4 | 5.7944 | 5.4 |
| 10/11/2017 1:28 PM | 12.9 | 19.8 | 62.7 | 5.5 | 5.0835 | 5.3 |
| 10/11/2017 1:29 PM | 12.6 | 21.8 | 90.1 | 5.7 | 6.1411 | 5.4 |
| 10/11/2017 1:30 PM | 12.9 | 19.3 | 37.7 | 4.5 | 3.4213 | 5   |
| 10/11/2017 1:31 PM | 13.2 | 21.6 | 92.8 | 5   | 5.05   | 5.1 |
| 10/11/2017 1:32 PM | 13.3 | 20.3 | 54   | 4.7 | 3.4199 | 5   |
| 10/11/2017 1:33 PM | 12.7 | 18.4 | 92.6 | 5.4 | 4.6584 | 5.1 |
| 10/11/2017 1:34 PM | 12.4 | 20   | 35.3 | 4.6 | 2.7583 | 4.6 |
| 10/11/2017 1:35 PM | 13   | 19.8 | 33.3 | 3.5 | 1.9347 | 4.5 |
| 10/11/2017 1:36 PM | 14.2 | 19.1 | 22.1 | 3.3 | 1.8878 | 4.4 |
| 10/11/2017 1:37 PM | 15.1 | 21.1 | 26.9 | 3.2 | 1.8297 | 4.4 |
| 10/11/2017 1:38 PM | 15.4 | 19.1 | 26.3 | 2.9 | 1.7243 | 4.3 |
| 10/11/2017 1:39 PM | 15.6 | 20.3 | 16.6 | 2.6 | 1.5885 | 4.3 |
| 10/11/2017 1:40 PM | 15.9 | 19.6 | 27.9 | 2.6 | 1.846  | 4.3 |
| 10/11/2017 1:41 PM | 15.9 | 19.8 | 27   | 2.7 | 1.9626 | 4.3 |
| 10/11/2017 1:42 PM | 15.9 | 19.5 | 12.8 | 2.4 | 1.4978 | 4.2 |
| 10/11/2017 1:43 PM | 16.2 | 19.5 | 14.9 | 2.2 | 1.4062 | 4.1 |
| 10/11/2017 1:44 PM | 16.6 | 21.3 | 22.6 | 2.2 | 1.7671 | 4.1 |
| 10/11/2017 1:45 PM | 16.8 | 20.1 | 12.5 | 2.2 | 1.4888 | 4.1 |
| 10/11/2017 1:46 PM | 16.7 | 20.1 | 14.7 | 2.1 | 1.4958 | 4   |
| 10/11/2017 1:47 PM | 16.8 | 22.6 | 13.9 | 2   | 1.4521 | 4   |
| 10/11/2017 1:48 PM | 16.9 | 21.9 | 21.9 | 2.1 | 1.7233 | 4   |
| 10/11/2017 1:49 PM | 17.1 | 20.9 | 15.9 | 2   | 1.3973 | 4   |
| 10/11/2017 1:50 PM | 17.4 | 20.9 | 23.4 | 2   | 1.4893 | 4   |
| 10/11/2017 1:51 PM | 17.5 | 20.8 | 33.4 | 2.2 | 1.7521 | 4   |
| 10/11/2017 1:52 PM | 17.4 | 21.2 | 17.9 | 2.1 | 1.5045 | 4   |
| 10/11/2017 1:53 PM | 17.3 | 22.2 | 36.8 | 2.3 | 2.0297 | 4.1 |
| 10/11/2017 1:54 PM | 17.4 | 21.2 | 17.3 | 2.2 | 1.4998 | 4   |
| 10/11/2017 1:55 PM | 17.6 | 21.1 | 24.7 | 2   | 1.5006 | 4   |
| 10/11/2017 1:56 PM | 17.7 | 21.8 | 27.5 | 2.1 | 1.6283 | 4   |
| 10/11/2017 1:57 PM | 17.8 | 22.2 | 35.7 | 2.1 | 1.7921 | 4   |
| 10/11/2017 1:58 PM | 17.7 | 22   | 22.5 | 2.1 | 1.5938 | 4   |
| 10/11/2017 1:59 PM | 17.9 | 20.6 | 22.1 | 2   | 1.486  | 4   |
| 10/11/2017 2:00 PM | 17.8 | 20.8 | 28.1 | 2.1 | 1.6022 | 4.1 |
| 10/11/2017 2:01 PM | 18   | 23.1 | 20.4 | 2   | 1.4844 | 4.1 |
| 10/11/2017 2:02 PM | 18   | 23.6 | 31   | 2.1 | 1.695  | 4.1 |
| 10/11/2017 2:03 PM | 18.5 | 23.6 | 27.1 | 2.1 | 1.6092 | 4.1 |
| 10/11/2017 2:04 PM | 18.7 | 23.2 | 27.3 | 2   | 1.5792 | 4   |
| 10/11/2017 2:05 PM | 18.9 | 21.7 | 28   | 1.9 | 1.5011 | 4   |

|                    |      |      |       |      |         |     |
|--------------------|------|------|-------|------|---------|-----|
| 10/11/2017 2:06 PM | 18.8 | 23.3 | 29.5  | 1.9  | 1.6173  | 4.1 |
| 10/11/2017 2:07 PM | 18.6 | 21.8 | 28.6  | 2    | 1.6069  | 4.1 |
| 10/11/2017 2:08 PM | 18.4 | 21.8 | 28.6  | 2    | 1.6643  | 4.1 |
| 10/11/2017 2:09 PM | 18.6 | 23.1 | 28.5  | 1.9  | 1.5783  | 4   |
| 10/11/2017 2:10 PM | 18.8 | 23.4 | 27.5  | 1.9  | 1.5499  | 4   |
| 10/11/2017 2:11 PM | 19   | 22.6 | 25.5  | 1.8  | 1.4224  | 4   |
| 10/11/2017 2:12 PM | 18.7 | 21.1 | 28    | 1.8  | 1.6569  | 4.1 |
| 10/11/2017 2:13 PM | 18.8 | 22.4 | 25    | 1.7  | 1.431   | 4   |
| 10/11/2017 2:14 PM | 18.6 | 23.3 | 31.3  | 1.8  | 1.7247  | 4   |
| 10/11/2017 2:15 PM | 18.7 | 22.5 | 29.3  | 1.8  | 1.6899  | 4   |
| 10/11/2017 2:16 PM | 18.7 | 21.6 | 28.9  | 1.8  | 1.7668  | 4   |
| 10/11/2017 2:17 PM | 18.8 | 21.5 | 26.7  | 1.8  | 1.6743  | 4   |
| 10/11/2017 2:18 PM | 19   | 22.5 | 23    | 1.8  | 1.4001  | 3.9 |
| 10/11/2017 2:19 PM | 19.1 | 23.3 | 26.8  | 2.1  | 1.6089  | 3.8 |
| 10/11/2017 2:20 PM | 19.6 | 22.9 | 26.1  | 1.7  | 1.4593  | 3.8 |
| 10/11/2017 2:21 PM | 19.4 | 22.3 | 25.8  | 1.7  | 1.3993  | 3.8 |
| 10/11/2017 2:22 PM | 18.7 | 21.4 | 31.3  | 2.1  | 1.8666  | 3.8 |
| 10/11/2017 2:23 PM | 17.5 | 21.2 | 46.8  | 11   | 2.805   | 4.1 |
| 10/11/2017 2:24 PM | 15.3 | 20.3 | 50.6  | 38.3 | 4.5913  | 4.3 |
| 10/11/2017 2:25 PM | 12.5 | 27.4 | 131.1 | 83.2 | 10.5325 | 5.2 |
| 10/11/2017 2:26 PM | 9.8  | 22.4 | 92.2  | 55   | 8.8313  | 5.2 |
| 10/11/2017 2:27 PM | 8.4  | 28.8 | 127.7 | 77.8 | 11.0443 | 5.5 |
| 10/11/2017 2:28 PM | 7.5  | 32.2 | 164.6 | 93.6 | 14.2692 | 6.1 |
| 10/11/2017 2:29 PM | 8.5  | 20.2 | 48.2  | 17.2 | 4.1423  | 4.9 |
| 10/11/2017 2:30 PM | 10.6 | 20.6 | 47.1  | 18.6 | 2.5281  | 4.2 |
| 10/11/2017 2:31 PM | 12   | 22.2 | 88.8  | 40.2 | 6.139   | 4.8 |
| 10/11/2017 2:32 PM | 11.7 | 21.7 | 77.9  | 48.1 | 5.3112  | 4.7 |
| 10/11/2017 2:33 PM | 10.9 | 20.9 | 48.6  | 19.5 | 3.7968  | 4.4 |
| 10/11/2017 2:34 PM | 12.2 | 17   | 37.3  | 30.4 | 2.0654  | 4.1 |
| 10/11/2017 2:35 PM | 13   | 20.7 | 35.2  | 18.1 | 2.4643  | 4.1 |
| 10/11/2017 2:36 PM | 14.1 | 19.1 | 47.5  | 37.2 | 3.1025  | 4.1 |
| 10/11/2017 2:37 PM | 13.7 | 20.5 | 32.3  | 9.8  | 2.5373  | 4.1 |
| 10/11/2017 2:38 PM | 15.6 | 22   | 27.7  | 5.3  | 1.2904  | 3.8 |
| 10/11/2017 2:39 PM | 16.7 | 20.5 | 30.8  | 16.7 | 1.7642  | 3.8 |
| 10/11/2017 2:40 PM | 17.1 | 20.1 | 32.3  | 17.6 | 2.8283  | 4   |
| 10/11/2017 2:41 PM | 16.5 | 19.4 | 33    | 20.4 | 2.1761  | 3.9 |
| 10/11/2017 2:42 PM | 15.6 | 21   | 29.5  | 10   | 2.1073  | 3.9 |
| 10/11/2017 2:43 PM | 15.6 | 18.9 | 34.6  | 25.4 | 3.0023  | 3.9 |
| 10/11/2017 2:44 PM | 14.6 | 19.2 | 39.8  | 25.7 | 4.318   | 4.1 |
| 10/11/2017 2:45 PM | 13.8 | 19.7 | 40.7  | 22.9 | 6.821   | 4.2 |
| 10/11/2017 2:46 PM | 12.8 | 19.8 | 54.1  | 25.5 | 4.8471  | 4.8 |
| 10/11/2017 2:47 PM | 14.2 | 24.8 | 50    | 3.6  | 2.7351  | 4.8 |
| 10/11/2017 2:48 PM | 16.1 | 21.7 | 39.3  | 4.2  | 3.0579  | 5.2 |
| 10/11/2017 2:49 PM | 18.3 | 23   | 25.8  | 2.5  | 1.1591  | 5.3 |
| 10/11/2017 2:50 PM | 19.1 | 23   | 25.1  | 2.2  | 1.0949  | 5.6 |
| 10/11/2017 2:51 PM | 19.1 | 21.5 | 33.8  | 8.3  | 1.5705  | 5.2 |
| 10/11/2017 2:52 PM | 18.6 | 21.6 | 26.9  | 2.4  | 1.2838  | 4.1 |

|                    |      |      |       |      |        |     |
|--------------------|------|------|-------|------|--------|-----|
| 10/11/2017 2:53 PM | 18.3 | 21.7 | 26    | 2.1  | 1.1689 | 3.9 |
| 10/11/2017 2:54 PM | 18.5 | 22.5 | 35.1  | 3    | 1.3563 | 4   |
| 10/11/2017 2:55 PM | 18.8 | 24.2 | 36.2  | 3.6  | 1.4628 | 4   |
| 10/11/2017 2:56 PM | 18.6 | 22.9 | 34.4  | 2.8  | 1.3894 | 4   |
| 10/11/2017 2:57 PM | 18.4 | 20.4 | 31.7  | 2.8  | 1.3563 | 3.9 |
| 10/11/2017 2:58 PM | 18.1 | 22.9 | 28.5  | 2.9  | 1.2422 | 3.9 |
| 10/11/2017 2:59 PM | 18.2 | 22.1 | 30    | 2.8  | 1.3062 | 3.8 |
| 10/11/2017 3:00 PM | 18.3 | 23.2 | 28.1  | 2.1  | 1.1925 | 3.8 |
| 10/11/2017 3:01 PM | 18.4 | 23   | 27.9  | 2    | 1.2264 | 3.8 |
| 10/11/2017 3:02 PM | 18.6 | 23.1 | 25.7  | 1.8  | 1.1703 | 3.7 |
| 10/11/2017 3:03 PM | 18.9 | 22.6 | 25.6  | 1.6  | 1.1305 | 3.7 |
| 10/11/2017 3:04 PM | 19.2 | 22.7 | 26.7  | 1.8  | 1.1923 | 4   |
| 10/11/2017 3:05 PM | 19.3 | 24.1 | 26.4  | 1.7  | 1.1674 | 4.8 |
| 10/11/2017 3:06 PM | 19.2 | 23.6 | 42    | 5.9  | 1.582  | 4.3 |
| 10/11/2017 3:07 PM | 17.8 | 22   | 95.8  | 18.7 | 3.2873 | 4.4 |
| 10/11/2017 3:08 PM | 15.4 | 19   | 122.5 | 22.4 | 4.4212 | 4.5 |
| 10/11/2017 3:09 PM | 12.9 | 19.4 | 93.1  | 24   | 3.2518 | 4.2 |
| 10/11/2017 3:10 PM | 12.3 | 19.4 | 72.6  | 17.2 | 2.6657 | 4   |
| 10/11/2017 3:11 PM | 12.6 | 18.2 | 48.4  | 19.7 | 2.6835 | 4   |
| 10/11/2017 3:12 PM | 13.1 | 17   | 65    | 17.5 | 2.8545 | 4   |
| 10/11/2017 3:13 PM | 12.5 | 17.3 | 33    | 17.9 | 2.1537 | 3.8 |
| 10/11/2017 3:14 PM | 12.8 | 18.4 | 28.3  | 14.7 | 1.78   | 3.6 |
| 10/11/2017 3:15 PM | 13.7 | 18.8 | 27.3  | 11.6 | 1.6188 | 4   |
| 10/11/2017 3:16 PM | 14.1 | 23.7 | 70.1  | 25.3 | 3.3607 | 4.2 |
| 10/11/2017 3:17 PM | 12.7 | 24.9 | 88.6  | 27.1 | 4.4095 | 4.5 |
| 10/11/2017 3:18 PM | 11.2 | 19.8 | 71.7  | 25   | 3.2487 | 4.1 |
| 10/11/2017 3:19 PM | 10.3 | 17.9 | 51.9  | 25.1 | 2.9612 | 4.1 |
| 10/11/2017 3:20 PM | 10.6 | 16.1 | 41.1  | 22.4 | 2.394  | 3.8 |
| 10/11/2017 3:21 PM | 11   | 20.1 | 51.7  | 24.2 | 2.843  | 3.9 |
| 10/11/2017 3:22 PM | 11.4 | 20.8 | 67.9  | 28.4 | 3.5637 | 4.1 |
| 10/11/2017 3:23 PM | 11.5 | 20.3 | 68.7  | 18.7 | 3.0283 | 4.5 |
| 10/11/2017 3:24 PM | 12.2 | 20.3 | 64    | 17.9 | 2.778  | 5.2 |
| 10/11/2017 3:25 PM | 13.1 | 20.7 | 45.2  | 13   | 2.072  | 3.9 |
| 10/11/2017 3:26 PM | 14.4 | 19.3 | 44.3  | 16.9 | 1.9343 | 3.7 |
| 10/11/2017 3:27 PM | 14.4 | 19   | 46.5  | 17.6 | 2.2637 | 3.8 |
| 10/11/2017 3:28 PM | 14.9 | 18.9 | 36.7  | 10.1 | 1.6857 | 3.7 |
| 10/11/2017 3:29 PM | 15.1 | 21   | 43.9  | 9.4  | 1.9123 | 3.7 |
| 10/11/2017 3:30 PM | 16.2 | 22.1 | 44    | 9.3  | 1.8492 | 3.7 |
| 10/11/2017 3:31 PM | 16.2 | 19.3 | 56.6  | 20.9 | 2.257  | 3.8 |
| 10/11/2017 3:32 PM | 15.4 | 19.3 | 46.5  | 15.2 | 2.269  | 3.8 |
| 10/11/2017 3:33 PM | 14.8 | 21.9 | 45.5  | 12.8 | 2.0353 | 3.7 |
| 10/11/2017 3:34 PM | 14.7 | 20.5 | 56.3  | 16.1 | 2.3195 | 3.8 |
| 10/11/2017 3:35 PM | 14.5 | 17.9 | 67    | 28.1 | 3.065  | 4   |
| 10/11/2017 3:36 PM | 13.4 | 18.7 | 60.9  | 33.5 | 2.885  | 3.9 |
| 10/11/2017 3:37 PM | 11   | 20.6 | 76.3  | 57.4 | 5.0503 | 4.5 |
| 10/11/2017 3:38 PM | 10.7 | 20.5 | 42.4  | 17.2 | 2.5275 | 4.2 |
| 10/11/2017 3:39 PM | 11.8 | 20.3 | 42.5  | 24.3 | 2.754  | 3.8 |

|                    |       |      |       |       |         |     |
|--------------------|-------|------|-------|-------|---------|-----|
| 10/11/2017 3:40 PM | 12.9  | 22.4 | 67.1  | 41.9  | 3.7305  | 4.2 |
| 10/11/2017 3:41 PM | 11.3  | 27.9 | 168   | 137.2 | 10.9052 | 5.9 |
| 10/11/2017 3:42 PM | 7.2   | 30.2 | 170.9 | 145.8 | 11.67   | 6.4 |
| 10/11/2017 3:43 PM | 4.5   | 21.3 | 127.2 | 84.2  | 7.503   | 5.7 |
| 10/11/2017 3:44 PM | 4.2   | 21.4 | 105.7 | 64    | 5.2177  | 5   |
| 10/11/2017 3:45 PM | 5.9   | 17.3 | 72.1  | 29.5  | 4.8435  | 4.5 |
| 10/11/2017 3:46 PM | 8.5   | 18.2 | 38.5  | 15.7  | 6.6822  | 4.2 |
| 10/11/2017 3:47 PM | 11.1  | 17.2 | 37.3  | 16.3  | 5.1807  | 4.6 |
| 10/11/2017 3:48 PM | 12.5  | 19.6 | 40.5  | 14.8  | 2.0008  | 4.8 |
| 10/11/2017 3:49 PM | 12.3  | 15.3 | 32.4  | 25.5  | 2.2133  | 4.8 |
| 10/11/2017 3:50 PM |       | 15.3 | 30.5  | 19.9  | 2.1418  | 4.8 |
| 10/11/2017 3:51 PM | 8.7   | 18.5 | 29.1  | 9.1   | 1.829   | 4.7 |
| 10/11/2017 3:52 PM | 9.3   | 18.6 | 26.1  | 4.4   | 1.3278  | 4.5 |
| 10/11/2017 3:53 PM | 8.3   | 17.8 | 32.6  | 21.2  | 1.9363  | 5.4 |
| 10/11/2017 3:54 PM | 0.4   | 21.2 | 70.7  | 30.5  | 3.059   | 4.8 |
| 10/11/2017 3:55 PM | 0.5   | 21.5 | 43.9  | 16    | 3.0807  | 4.1 |
| 10/11/2017 3:56 PM | 0.6   | 22.2 | 27.9  | 4.3   | 1.0998  | 3.5 |
| 10/11/2017 3:57 PM | 0.7   | 20.9 | 28.9  | 6.5   | 1.3255  | 3.5 |
| 10/11/2017 3:58 PM | 0.7   | 20.3 | 30.6  | 3.4   | 1.2812  | 3.4 |
| 10/11/2017 3:59 PM | 0.6   | 21.9 | 56.4  | 2.5   | 2.4338  | 3.7 |
| 10/11/2017 4:00 PM | 0.5   | 23.5 | 101.1 | 16.5  | 5.9345  | 4.4 |
| 10/11/2017 4:01 PM | 0.5   | 20   | 42.5  | 12.5  | 2.3635  | 3.8 |
| 10/11/2017 4:02 PM | 0.5   | 19.4 | 78.4  | 29.7  | 3.7123  | 3.9 |
| 10/11/2017 4:03 PM | 0.6   | 18.7 | 42.6  | 11.5  | 1.8388  | 3.8 |
| 10/11/2017 4:04 PM | 0.6   | 19.4 | 44.8  | 17.7  | 1.856   | 3.6 |
| 10/11/2017 4:05 PM | 0.5   | 18.8 | 75.4  | 40.8  | 4.0955  | 4.1 |
| 10/11/2017 4:06 PM | 0.5   | 17.7 | 58.2  | 29.8  | 2.7563  | 3.8 |
| 10/11/2017 4:07 PM | 0.5   | 18.4 | 39.5  | 16.3  | 2.0202  | 3.7 |
| 10/11/2017 4:08 PM | 0.5   | 19.7 | 52    | 13    | 2.115   | 3.6 |
| 10/11/2017 4:09 PM | 0.6   | 20.3 | 34.5  | 3.9   | 1.4757  | 3.5 |
| 10/11/2017 4:10 PM | 0.6   | 20.7 | 33.7  | 3.1   | 1.272   | 3.5 |
| 10/11/2017 4:11 PM | 0.6   | 18.9 | 38.5  | 3.6   | 1.3643  | 3.5 |
| 10/11/2017 4:12 PM | 0.6   | 20   | 39.8  | 4.2   | 1.4282  | 3.5 |
| 10/11/2017 4:13 PM | 0.6   | 20.2 | 31.1  | 3.4   | 1.2618  | 3.6 |
| 10/11/2017 4:14 PM | 0.6   | 21.7 | 39.6  | 4.8   | 1.59    | 5.8 |
| 10/11/2017 4:15 PM | -4.1  | 20.1 | 39.6  | 3.7   | 1.4562  | 6.3 |
| 10/11/2017 4:16 PM | -13.6 | 20.9 | 47.9  | 3.3   | 1.5212  | 5.8 |
| 10/11/2017 4:17 PM | -22.5 | 22.5 | 56.1  | 4     | 1.837   | 6.5 |
| 10/11/2017 4:18 PM | -24.8 | 22.3 | 55.9  | 4.1   | 1.8877  | 5.8 |
| 10/11/2017 4:19 PM | 0.6   | 23.3 | 63.1  | 4.6   | 1.9997  | 4.6 |
| 10/11/2017 4:20 PM | 0.6   | 24.9 | 57.9  | 4.6   | 2.0248  | 3.8 |
| 10/11/2017 4:21 PM | 0.6   | 22.1 | 52.7  | 3.7   | 1.8733  | 3.7 |
| 10/11/2017 4:22 PM | 0.6   | 23.2 | 53.6  | 4.1   | 1.9222  | 3.6 |
| 10/11/2017 4:23 PM | 0.6   | 22.5 | 54.5  | 7.1   | 2.2675  | 3.7 |
| 10/11/2017 4:24 PM | 0.6   | 30.8 | 82    | 15.9  | 2.187   | 3.8 |
| 10/11/2017 4:25 PM | 0.5   | 30.7 | 195.3 | 41.5  | 8.672   | 5.3 |
| 10/11/2017 4:26 PM | 0.5   | 23   | 110.5 | 13.9  | 4.3998  | 4.7 |

|                    |      |      |       |       |         |     |
|--------------------|------|------|-------|-------|---------|-----|
| 10/11/2017 4:27 PM | 0.4  | 26.1 | 124.8 | 17.5  | 4.338   | 4.3 |
| 10/11/2017 4:28 PM | 0.5  | 23.1 | 102.5 | 12.4  | 3.5742  | 4.1 |
| 10/11/2017 4:29 PM | 0.5  | 24.5 | 68.1  | 9.7   | 2.5105  | 3.9 |
| 10/11/2017 4:30 PM | 0.5  | 22.4 | 71.5  | 10.6  | 2.4222  | 3.7 |
| 10/11/2017 4:31 PM | 0.5  | 38.8 | 197.8 | 27.2  | 5.1888  | 4.4 |
| 10/11/2017 4:32 PM | 0.4  | 39.2 | 287.1 | 46.3  | 12.3005 | 6.5 |
| 10/11/2017 4:33 PM | 0.3  | 45   | 291.2 | 54.9  | 8.9608  | 5.6 |
| 10/11/2017 4:34 PM | 0.2  | 39.8 | 309.2 | 54.4  | 14.2797 | 7.2 |
| 10/11/2017 4:35 PM | 0.2  | 23.1 | 152.9 | 36    | 5.318   | 4.9 |
| 10/11/2017 4:36 PM | 0.2  | 20.6 | 133.7 | 36    | 5.1865  | 4.5 |
| 10/11/2017 4:37 PM | 0.3  | 19.9 | 105.7 | 27.7  | 4.5832  | 4.2 |
| 10/11/2017 4:38 PM | 0.3  | 17.8 | 77.3  | 20.3  | 3.08    | 3.8 |
| 10/11/2017 4:39 PM | 0.3  | 18.7 | 74.6  | 29.5  | 3.4562  | 3.9 |
| 10/11/2017 4:40 PM | 0.3  | 21.2 | 111.8 | 40.4  | 5.0047  | 4.1 |
| 10/11/2017 4:41 PM | 0.2  | 20.8 | 112   | 47.9  | 6.558   | 4.5 |
| 10/11/2017 4:42 PM | 0.2  | 20.5 | 84.5  | 29.3  | 4.5275  | 4.1 |
| 10/11/2017 4:43 PM | 0.2  | 19.7 | 100   | 53.9  | 6.333   | 4.4 |
| 10/11/2017 4:44 PM | 0.2  | 25.3 | 105.9 | 38    | 5.2165  | 4.5 |
| 10/11/2017 4:45 PM | 0.2  | 38.6 | 234.8 | 99.3  | 11.8207 | 5.6 |
| 10/11/2017 4:46 PM | 0.2  | 28.5 | 188.4 | 68.5  | 11.983  | 5.8 |
| 10/11/2017 4:47 PM | 0.2  | 25   | 142.9 | 56.7  | 6.1403  | 4.4 |
| 10/11/2017 4:48 PM | 0.1  | 19.7 | 67.4  | 25.4  | 3.8887  | 4.1 |
| 10/11/2017 4:49 PM | 0.3  | 28.9 | 156.2 | 79.1  | 7.7822  | 4.5 |
| 10/11/2017 4:50 PM | 1.7  | 20.9 | 98.9  | 41.1  | 6.8312  | 4.6 |
| 10/11/2017 4:51 PM | 5.1  | 21   | 63    | 24.1  | 2.8053  | 3.6 |
| 10/11/2017 4:52 PM | 8.8  | 19   | 34.2  | 8.9   | 2.0998  | 3.4 |
| 10/11/2017 4:53 PM | 12   | 25.3 | 73.6  | 24.2  | 3.0552  | 3.5 |
| 10/11/2017 4:54 PM | 12.4 | 22.1 | 88.3  | 30.1  | 4.4607  | 3.9 |
| 10/11/2017 4:55 PM | 11.8 | 18.2 | 69.8  | 30.3  | 4.3152  | 3.8 |
| 10/11/2017 4:56 PM | 10.7 | 25.3 | 90.9  | 47.8  | 3.8192  | 3.7 |
| 10/11/2017 4:57 PM | 8.9  | 23.7 | 117.8 | 54.6  | 7.1308  | 4.4 |
| 10/11/2017 4:58 PM | 7.6  | 30.7 | 167.2 | 73.2  | 17.6167 | 5   |
| 10/11/2017 4:59 PM | 4.8  | 27.9 | 181.1 | 116.5 | 12.9717 | 5.5 |
| 10/11/2017 5:00 PM | 4.3  | 22.2 | 126.9 | 106.4 | 8.1912  | 4.7 |
| 10/11/2017 5:01 PM | 5.3  | 18.2 | 66.7  | 100.2 | 3.796   | 3.8 |
| 10/11/2017 5:02 PM | 6.7  | 21.4 | 88.4  | 80.3  | 5.97    | 3.9 |
| 10/11/2017 5:03 PM | 6.9  | 24   | 140.5 | 88.5  | 10.383  | 4.7 |
| 10/11/2017 5:04 PM | 5.4  | 32.2 | 206.2 | 96.3  | 12.4227 | 5.2 |
| 10/11/2017 5:05 PM | 4.7  | 21.9 | 120.2 | 44.4  | 6.6033  | 4.6 |
| 10/11/2017 5:06 PM | 5.2  | 25.4 | 155.9 | 31.7  | 6.9735  | 4.7 |
| 10/11/2017 5:07 PM | 7.1  | 28.3 | 134   | 26.5  | 4.0483  | 4.1 |
| 10/11/2017 5:08 PM | 8    | 34.2 | 218.4 | 40.2  | 6.965   | 5   |
| 10/11/2017 5:09 PM | 7.8  | 30.9 | 228.7 | 43.1  | 11.7845 | 5.9 |
| 10/11/2017 5:10 PM | 7.5  | 23.2 | 116.6 | 18.2  | 4.367   | 4.4 |
| 10/11/2017 5:11 PM | 7.8  | 27   | 143.9 | 24.4  | 5.2305  | 4.4 |
| 10/11/2017 5:12 PM | 7.9  | 33.3 | 226.8 | 38.4  | 8.836   | 5.2 |
| 10/11/2017 5:13 PM | 7.5  | 26.4 | 137.4 | 27.4  | 5.3827  | 4.6 |



|                    |      |      |       |      |         |     |
|--------------------|------|------|-------|------|---------|-----|
| 10/11/2017 5:14 PM | 6.8  | 24.4 | 155.7 | 25.8 | 6.9639  | 4.9 |
| 10/11/2017 5:15 PM | 7.8  | 22.6 | 114.8 | 14.2 | 4.4056  | 4.1 |
| 10/11/2017 5:16 PM | 8.6  | 18.8 | 68.3  | 10.9 | 3.1368  | 3.8 |
| 10/11/2017 5:17 PM | 9.6  | 19.4 | 94.5  | 10.9 | 3.9112  | 4.5 |
| 10/11/2017 5:18 PM | 10.3 | 16.2 | 36.4  | 6.8  | 1.6265  | 4.7 |
| 10/11/2017 5:19 PM | 11.1 | 16   | 33.4  | 6.9  | 6.3105  | 4.4 |
| 10/11/2017 5:20 PM | 11.4 | 14.3 | 27    | 6.2  | 6.5414  | 4.3 |
| 10/11/2017 5:21 PM | 10.9 | 14.7 | 32.8  | 4.5  | 4.2706  | 4.6 |
| 10/11/2017 5:22 PM | 10.3 | 15.4 | 26.3  | 3.8  | 3.4488  | 4.2 |
| 10/11/2017 5:23 PM | 9.9  | 14.9 | 33    | 4.1  | 9.6464  | 4.9 |
| 10/11/2017 5:24 PM | 9.3  | 18.4 | 40.4  | 5.8  | 19.5483 | 5.7 |
| 10/11/2017 5:25 PM | 7.4  | 16.1 | 35.5  | 6.7  | 7.7216  | 6.1 |

## Konza Prairie November 2017

| Date&Time           | O3 NO-CL | O3 UV-C-H | O3 UV-C | NO2-C | NO  | CO     | THC  |
|---------------------|----------|-----------|---------|-------|-----|--------|------|
| 11/10/2017 12:00 AM | 30.8     | 29.3      | 28.8    | -0.1  | 0.6 | -0.141 | -1.5 |
| 11/10/2017 12:01 AM | 30.9     | 29.9      | 28.3    | -0.1  | 1.1 | -0.135 | -1.5 |
| 11/10/2017 12:02 AM | 30.9     | 29.1      | 28.6    | 0     | 1.1 | -0.142 | -1.5 |
| 11/10/2017 12:03 AM | 30.9     | 29.3      | 28.6    | 0.2   | 1.3 | -0.149 | -1.5 |
| 11/10/2017 12:04 AM | 30.9     | 29.5      | 28.7    | 0.2   | 1.2 | -0.141 | -1.5 |
| 11/10/2017 12:05 AM | 31       | 29.1      | 29.1    | 0.2   | 0.6 | -0.135 | -1.5 |
| 11/10/2017 12:06 AM | 31.2     | 28.4      | 28.5    | 0.1   | 1.1 | -0.141 | -1.5 |
| 11/10/2017 12:07 AM | 31       | 28.6      | 28.4    | 0     | 1   | -0.145 | -1.5 |
| 11/10/2017 12:08 AM | 30.9     | 29.9      | 28.3    | -0.1  | 0.9 | -0.139 | -1.5 |
| 11/10/2017 12:09 AM | 30.7     | 29.8      | 28.9    | -0.1  | 0.8 | -0.135 | -1.5 |
| 11/10/2017 12:10 AM | 30.9     | 27.9      | 28.5    | -0.2  | 0.8 | -0.145 | -1.5 |
| 11/10/2017 12:11 AM | 31.1     | 27.8      | 28.8    | -0.2  | 0.6 | -0.142 | -1.5 |
| 11/10/2017 12:12 AM | 31.3     | 30.4      | 28.8    | -0.2  | 0.9 | -0.141 | -1.5 |
| 11/10/2017 12:13 AM | 31.1     | 28.7      | 28.3    | -0.2  | 2.1 | -0.136 | -1.5 |
| 11/10/2017 12:14 AM | 30.9     | 29.5      | 28.5    | -0.1  | 1.7 | -0.148 | -1.5 |
| 11/10/2017 12:15 AM | 30.7     | 28.6      | 28.6    | 0     | 0.4 | -0.142 | -1.5 |
| 11/10/2017 12:16 AM | 30.7     | 28.9      | 28.5    | -0.1  | 0.5 | -0.134 | -1.5 |
| 11/10/2017 12:17 AM | 30.9     | 28.7      | 28.8    | -0.1  | 0.5 | -0.137 | -1.5 |
| 11/10/2017 12:18 AM | 30.9     | 29.1      | 28.7    | -0.1  | 0.6 | -0.147 | -1.5 |
| 11/10/2017 12:19 AM | 30.9     | 30.3      | 28.5    | -0.2  | 1   | -0.138 | -1.5 |
| 11/10/2017 12:20 AM | 30.8     | 29        | 28.3    | -0.2  | 1   | -0.134 | -1.5 |
| 11/10/2017 12:21 AM | 30.9     | 31.3      | 28.7    | -0.3  | 0.4 | -0.140 | -1.5 |
| 11/10/2017 12:22 AM | 30.9     | 29.2      | 28.5    | -0.3  | 1.4 | -0.147 | -1.5 |
| 11/10/2017 12:23 AM | 31       | 30.1      | 28.7    | -0.3  | 0.5 | -0.137 | -1.5 |
| 11/10/2017 12:24 AM | 30.8     | 29.3      | 28.5    | -0.3  | 0.8 | -0.137 | -1.5 |
| 11/10/2017 12:25 AM | 30.8     | 27.1      | 28.5    | -0.3  | 0.9 | -0.147 | -1.5 |
| 11/10/2017 12:26 AM | 30.6     | 28.6      | 28.5    | -0.2  | 0.6 | -0.137 | -1.5 |
| 11/10/2017 12:27 AM | 30.5     | 29.7      | 28.2    | -0.2  | 0.7 | -0.132 | -1.5 |
| 11/10/2017 12:28 AM | 30.5     | 29.1      | 28.3    | -0.2  | 0.7 | -0.144 | -1.5 |
| 11/10/2017 12:29 AM | 30.7     | 28.9      | 28.5    | -0.2  | 0.6 | -0.150 | -1.5 |
| 11/10/2017 12:30 AM | 30.8     | 28.7      | 28.2    | -0.2  | 1   | -0.140 | -1.5 |
| 11/10/2017 12:31 AM | 30.9     | 29.4      | 28.5    | -0.2  | 0.5 | -0.139 | -1.5 |
| 11/10/2017 12:32 AM | 30.7     | 30.7      | 28.5    | -0.2  | 0.7 | -0.150 | -1.5 |
| 11/10/2017 12:33 AM | 30.6     | 28.7      | 28      | -0.2  | 1   | -0.141 | -1.5 |
| 11/10/2017 12:34 AM | 30.3     | 28.4      | 27.9    | -0.3  | 1.3 | -0.134 | -1.5 |
| 11/10/2017 12:35 AM | 30.2     | 29.2      | 28.7    | -0.3  | 0.5 | -0.142 | -1.5 |
| 11/10/2017 12:36 AM | 30.3     | 28.6      | 28.3    | -0.3  | 1.2 | -0.147 | -1.5 |
| 11/10/2017 12:37 AM | 30.6     | 29        | 28      | -0.3  | 1   | -0.136 | -1.5 |
| 11/10/2017 12:38 AM | 30.5     | 28.1      | 28      | -0.3  | 0.9 | -0.134 | -1.5 |
| 11/10/2017 12:39 AM | 30.4     | 29.8      | 28      | -0.3  | 0.6 | -0.143 | -1.5 |
| 11/10/2017 12:40 AM | 30.3     | 29.5      | 27.8    | -0.2  | 1.6 | -0.142 | -1.5 |
| 11/10/2017 12:41 AM | 30.3     | 27.5      | 28.1    | -0.2  | 0.6 | -0.132 | -1.5 |
| 11/10/2017 12:42 AM | 30.4     | 29.7      | 28.3    | -0.3  | 0.6 | -0.132 | -1.5 |
| 11/10/2017 12:43 AM | 30.4     | 28.9      | 28      | -0.3  | 1   | -0.145 | -1.5 |
| 11/10/2017 12:44 AM | 30.6     | 28.3      | 28.2    | -0.3  | 1   | -0.139 | -1.5 |

|                     |      |      |      |      |     |        |      |
|---------------------|------|------|------|------|-----|--------|------|
| 11/10/2017 12:45 AM | 30.4 | 28.3 | 28   | -0.3 | 0.8 | -0.138 | -1.5 |
| 11/10/2017 12:46 AM | 30.6 | 30.5 | 28.3 | -0.2 | 0.9 | -0.142 | -1.5 |
| 11/10/2017 12:47 AM | 30.6 | 29.3 | 28.6 | -0.1 | 0.2 | -0.145 | -1.5 |
| 11/10/2017 12:48 AM | 30.8 | 28.8 | 28.4 | -0.1 | 0.8 | -0.140 | -1.5 |
| 11/10/2017 12:49 AM | 30.7 | 31.1 | 28.5 | -0.1 | 0.3 | -0.131 | -1.5 |
| 11/10/2017 12:50 AM | 30.7 | 30.3 | 28.5 | -0.1 | 0.9 | -0.139 | -1.5 |
| 11/10/2017 12:51 AM | 30.8 | 29.5 | 28.6 | -0.2 | 0.7 | -0.148 | -1.5 |
| 11/10/2017 12:52 AM | 30.8 | 30.7 | 28.7 | -0.2 | 0.7 | -0.143 | -1.5 |
| 11/10/2017 12:53 AM | 30.8 | 29.7 | 28.3 | -0.3 | 0.9 | -0.134 | -1.5 |
| 11/10/2017 12:54 AM | 30.7 | 29.6 | 28.6 | -0.3 | 0.9 | -0.146 | -1.5 |
| 11/10/2017 12:55 AM | 30.7 | 29.6 | 28.6 | -0.3 | 0.5 | -0.151 | -1.5 |
| 11/10/2017 12:56 AM | 30.7 | 29.5 | 28.6 | -0.3 | 0.6 | -0.132 | -1.5 |
| 11/10/2017 12:57 AM | 30.7 | 29.2 | 28.4 | -0.3 | 0.5 | -0.136 | -1.5 |
| 11/10/2017 12:58 AM | 30.7 | 29.3 | 28.7 | -0.3 | 0.7 | -0.149 | -1.5 |
| 11/10/2017 12:59 AM | 30.9 | 28.6 | 28.6 | -0.4 | 0.7 | -0.142 | -1.5 |
| 11/10/2017 1:00 AM  | 30.9 | 30.5 | 28.4 | -0.4 | 0.8 | -0.123 | -1.5 |
| 11/10/2017 1:01 AM  | 31.1 | 29.5 | 28.7 | -0.4 | 0.5 | -0.140 | -1.5 |
| 11/10/2017 1:02 AM  | 31.1 | 29.3 | 28.5 | -0.4 | 0.9 | -0.148 | -1.5 |
| 11/10/2017 1:03 AM  | 31.1 | 29.9 | 28.8 | -0.5 | 0.7 | -0.134 | -1.5 |
| 11/10/2017 1:04 AM  | 31.1 | 30   | 29   | -0.5 | 0.3 | -0.136 | -1.5 |
| 11/10/2017 1:05 AM  | 31.1 | 28.6 | 28.3 | -0.5 | 0.6 | -0.145 | -1.5 |
| 11/10/2017 1:06 AM  | 31   | 28.5 | 28.4 | -0.5 | 0.6 | -0.141 | -1.5 |
| 11/10/2017 1:07 AM  | 30.9 | 27.2 | 28.5 | -0.5 | 0.4 | -0.135 | -1.5 |
| 11/10/2017 1:08 AM  | 30.9 | 28.4 | 28.5 | -0.5 | 0.3 | -0.140 | -1.5 |
| 11/10/2017 1:09 AM  | 31   | 28.9 | 28.2 | -0.6 | 0.8 | -0.148 | -1.5 |
| 11/10/2017 1:10 AM  | 31   | 29.7 | 28.5 | -0.5 | 0.6 | -0.141 | -1.5 |
| 11/10/2017 1:11 AM  | 31   | 28.5 | 28.2 | -0.5 | 0.9 | -0.128 | -1.5 |
| 11/10/2017 1:12 AM  | 30.9 | 29.2 | 28.2 | -0.5 | 0.6 | -0.132 | -1.5 |
| 11/10/2017 1:13 AM  | 30.8 | 29.8 | 28.6 | -0.5 | 1.2 | -0.143 | -1.5 |
| 11/10/2017 1:14 AM  | 30.9 | 29.1 | 28.6 | -0.5 | 0.2 | -0.134 | -1.5 |
| 11/10/2017 1:15 AM  | 30.9 | 27.4 | 28.2 | -0.5 | 1   | -0.136 | -1.5 |
| 11/10/2017 1:16 AM  | 30.9 | 27.3 | 28.3 | -0.5 | 0.7 | -0.141 | -1.5 |
| 11/10/2017 1:17 AM  | 30.6 | 28.9 | 28.2 | -0.5 | 0.6 | -0.139 | -1.5 |
| 11/10/2017 1:18 AM  | 30.5 | 29   | 28.2 | -0.5 | 0.7 | -0.131 | -1.5 |
| 11/10/2017 1:19 AM  | 30.6 | 28.6 | 28.2 | -0.5 | 0.9 | -0.128 | -1.5 |
| 11/10/2017 1:20 AM  | 30.6 | 27.6 | 28.3 | -0.5 | 0.8 | -0.142 | -1.5 |
| 11/10/2017 1:21 AM  | 30.5 | 28.8 | 27.7 | -0.5 | 1.4 | -0.138 | -1.5 |
| 11/10/2017 1:22 AM  | 30.4 | 28.7 | 28.2 | -0.4 | 0.5 | -0.126 | -1.5 |
| 11/10/2017 1:23 AM  | 30.3 | 29.4 | 27.8 | -0.4 | 0.5 | -0.134 | -1.5 |
| 11/10/2017 1:24 AM  | 30.3 | 28.6 | 27.8 | -0.4 | 0.9 | -0.138 | -1.5 |
| 11/10/2017 1:25 AM  | 30.3 | 27.1 | 27.8 | -0.3 | 0.4 | -0.133 | -1.5 |
| 11/10/2017 1:26 AM  | 30.3 | 28.9 | 28   | -0.4 | 0.5 | -0.121 | -1.5 |
| 11/10/2017 1:27 AM  | 30.4 | 28.9 | 27.9 | -0.3 | 0.3 | -0.157 | -1.5 |
| 11/10/2017 1:28 AM  | 30.6 | 28.9 | 28.4 | -0.3 | 0.3 | -0.144 | -1.5 |
| 11/10/2017 1:29 AM  | 30.7 | 28.3 | 28.5 | -0.4 | 0.3 | -0.133 | -1.5 |
| 11/10/2017 1:30 AM  | 30.6 | 28.6 | 28   | -0.4 | 0.6 | -0.128 | -1.5 |
| 11/10/2017 1:31 AM  | 30.5 | 27.9 | 28   | -0.4 | 0.8 | -0.150 | -1.5 |

|                    |      |      |      |      |     |        |      |
|--------------------|------|------|------|------|-----|--------|------|
| 11/10/2017 1:32 AM | 30.4 | 28.8 | 28.2 | -0.4 | 0.3 | -0.137 | -1.5 |
| 11/10/2017 1:33 AM | 30.3 | 27.4 | 27.5 | -0.4 | 0.7 | -0.125 | -1.5 |
| 11/10/2017 1:34 AM | 30.4 | 29.5 | 28.1 | -0.4 | 0.4 | -0.132 | -1.5 |
| 11/10/2017 1:35 AM | 30.3 | 27.5 | 27.9 | -0.4 | 0.7 | -0.136 | -1.5 |
| 11/10/2017 1:36 AM | 30.5 | 27.7 | 27.9 | -0.4 | 0.6 | -0.133 | -1.5 |
| 11/10/2017 1:37 AM | 30.5 | 29.1 | 28   | -0.4 | 0.5 | -0.126 | -1.5 |
| 11/10/2017 1:38 AM | 30.3 | 28.1 | 27.5 | -0.4 | 1.2 | -0.139 | -1.5 |
| 11/10/2017 1:39 AM | 30.1 | 27.9 | 27.8 | -0.4 | 0.5 | -0.134 | -1.5 |
| 11/10/2017 1:40 AM | 30.1 | 27.7 | 27.9 | -0.4 | 0.3 | -0.128 | -1.5 |
| 11/10/2017 1:41 AM | 30.3 | 28.5 | 28   | -0.4 | 0.4 | -0.130 | -1.5 |
| 11/10/2017 1:42 AM | 30.4 | 28.5 | 28.1 | -0.4 | 0.1 | -0.143 | -1.5 |
| 11/10/2017 1:43 AM | 30.3 | 29.3 | 27.9 | -0.4 | 0.8 | -0.131 | -1.5 |
| 11/10/2017 1:44 AM | 30.1 | 25.9 | 27.5 | -0.4 | 1.2 | -0.124 | -1.5 |
| 11/10/2017 1:45 AM | 30   | 28.2 | 28   | -0.4 | 0.5 | -0.133 | -1.5 |
| 11/10/2017 1:46 AM | 30.1 | 28.2 | 27.7 | -0.4 | 0.5 | -0.136 | -1.5 |
| 11/10/2017 1:47 AM | 30.2 | 29.5 | 28.1 | -0.4 | 0.4 | -0.132 | -1.5 |
| 11/10/2017 1:48 AM | 30.3 | 28.3 | 27.7 | -0.4 | 0.7 | -0.126 | -1.5 |
| 11/10/2017 1:49 AM | 30.1 | 28.3 | 27.8 | -0.4 | 0.3 | -0.129 | -1.5 |
| 11/10/2017 1:50 AM | 30   | 27.2 | 27.9 | -0.4 | 0.2 | -0.143 | -1.5 |
| 11/10/2017 1:51 AM | 30.1 | 28.5 | 27.9 | -0.4 | 0.5 | -0.137 | -1.5 |
| 11/10/2017 1:52 AM | 30.1 | 27.9 | 27.5 | -0.4 | 1.1 | -0.129 | -1.5 |
| 11/10/2017 1:53 AM | 30.1 | 27.4 | 27.7 | -0.4 | 0.7 | -0.130 | -1.5 |
| 11/10/2017 1:54 AM | 29.9 | 28.2 | 27.6 | -0.4 | 0.4 | -0.137 | -1.5 |
| 11/10/2017 1:55 AM | 29.9 | 26.8 | 27.5 | -0.4 | 0.8 | -0.134 | -1.5 |
| 11/10/2017 1:56 AM | 29.9 | 30.3 | 27.7 | -0.4 | 0.2 | -0.129 | -1.5 |
| 11/10/2017 1:57 AM | 29.8 | 28.2 | 27.4 | -0.4 | 0.7 | -0.131 | -1.5 |
| 11/10/2017 1:58 AM | 29.9 | 29   | 27.8 | -0.4 | 0.4 | -0.134 | -1.5 |
| 11/10/2017 1:59 AM | 29.9 | 28.3 | 27.9 | -0.4 | 0.4 | -0.129 | -1.5 |
| 11/10/2017 2:00 AM | 30   | 28.5 | 27.4 | -0.5 | 1.1 | -0.130 | -1.5 |
| 11/10/2017 2:01 AM | 29.9 | 27.8 | 27.2 | -0.5 | 1.1 | -0.137 | -1.5 |
| 11/10/2017 2:02 AM | 29.5 | 28.1 | 27.3 | -0.5 | 0.6 | -0.133 | -1.5 |
| 11/10/2017 2:03 AM | 29.5 | 28   | 27.2 | -0.5 | 0.6 | -0.123 | -1.5 |
| 11/10/2017 2:04 AM | 29.5 | 28.3 | 27.2 | -0.5 | 0.9 | -0.134 | -1.5 |
| 11/10/2017 2:05 AM | 29.6 | 26.6 | 27.5 | -0.5 | 0.9 | -0.136 | -1.5 |
| 11/10/2017 2:06 AM | 29.6 | 26.9 | 27.2 | -0.5 | 0.5 | -0.124 | -1.5 |
| 11/10/2017 2:07 AM | 29.6 | 27.9 | 27.5 | -0.5 | 0.5 | -0.124 | -1.5 |
| 11/10/2017 2:08 AM | 29.8 | 28.1 | 27.4 | -0.4 | 0.4 | -0.136 | -1.5 |
| 11/10/2017 2:09 AM | 29.7 | 26.6 | 26.8 | -0.4 | 1.2 | -0.133 | -1.5 |
| 11/10/2017 2:10 AM | 29.6 | 27.9 | 27.2 | -0.3 | 0.6 | -0.125 | -1.5 |
| 11/10/2017 2:11 AM | 29.4 | 27.5 | 26.9 | -0.3 | 1.9 | -0.131 | -1.5 |
| 11/10/2017 2:12 AM | 29.2 | 27.7 | 27.1 | -0.2 | 2.1 | -0.133 | -1.5 |
| 11/10/2017 2:13 AM | 29.3 | 26.8 | 27   | -0.2 | 0.6 | -0.126 | -1.5 |
| 11/10/2017 2:14 AM | 29.4 | 28.2 | 27.6 | -0.2 | 0.6 | -0.121 | -1.5 |
| 11/10/2017 2:15 AM | 29.6 | 27.6 | 27.2 | -0.2 | 0.5 | -0.129 | -1.5 |
| 11/10/2017 2:16 AM | 29.7 | 28   | 27.1 | -0.3 | 1.1 | -0.130 | -1.5 |
| 11/10/2017 2:17 AM | 29.5 | 28.5 | 27.1 | -0.3 | 1   | -0.126 | -1.5 |
| 11/10/2017 2:18 AM | 29.5 | 27.6 | 27.4 | -0.3 | 0.6 | -0.118 | -1.5 |

|                    |      |      |      |      |     |        |      |
|--------------------|------|------|------|------|-----|--------|------|
| 11/10/2017 2:19 AM | 29.4 | 28.8 | 26.8 | -0.3 | 1.9 | -0.130 | -1.5 |
| 11/10/2017 2:20 AM | 29.3 | 28.1 | 27.1 | -0.3 | 1.6 | -0.130 | -1.5 |
| 11/10/2017 2:21 AM | 29   | 26.5 | 26.9 | -0.3 | 1.6 | -0.122 | -1.5 |
| 11/10/2017 2:22 AM | 29   | 28.3 | 26.9 | -0.3 | 0.9 | -0.124 | -1.5 |
| 11/10/2017 2:23 AM | 29.1 | 27.3 | 27   | -0.2 | 0.8 | -0.133 | -1.5 |
| 11/10/2017 2:24 AM | 29.2 | 28.4 | 27.1 | -0.2 | 0.7 | -0.122 | -1.5 |
| 11/10/2017 2:25 AM | 29.3 | 29.6 | 27   | -0.1 | 1.1 | -0.118 | -1.5 |
| 11/10/2017 2:26 AM | 29.3 | 28   | 27.1 | -0.1 | 1.1 | -0.130 | -1.5 |
| 11/10/2017 2:27 AM | 29.3 | 26.6 | 27.3 | -0.1 | 0.8 | -0.134 | -1.5 |
| 11/10/2017 2:28 AM | 29.3 | 27.7 | 26.8 | -0.2 | 0.6 | -0.124 | -1.5 |
| 11/10/2017 2:29 AM | 29.3 | 28.1 | 27.1 | -0.2 | 1.3 | -0.122 | -1.5 |
| 11/10/2017 2:30 AM | 29.2 | 26.5 | 27.2 | -0.1 | 1.1 | -0.129 | -1.5 |
| 11/10/2017 2:31 AM | 29.2 | 28.2 | 27.2 | -0.1 | 0.8 | -0.134 | -1.5 |
| 11/10/2017 2:32 AM | 29.2 | 28.7 | 26.9 | 0.1  | 1.1 | -0.120 | -1.5 |
| 11/10/2017 2:33 AM | 29.4 | 28.3 | 27.6 | 0.1  | 0.3 | -0.120 | -1.5 |
| 11/10/2017 2:34 AM | 29.6 | 27.2 | 27.6 | 0    | 0.2 | -0.133 | -1.5 |
| 11/10/2017 2:35 AM | 29.8 | 28.6 | 27.3 | -0.1 | 0.4 | -0.126 | -1.5 |
| 11/10/2017 2:36 AM | 29.7 | 28.5 | 26.9 | -0.3 | 0.9 | -0.130 | -1.5 |
| 11/10/2017 2:37 AM | 29.5 | 27.4 | 27.2 | -0.4 | 0.7 | -0.130 | -1.5 |
| 11/10/2017 2:38 AM | 29.5 | 27.6 | 27.2 | -0.4 | 0.3 | -0.128 | -1.5 |
| 11/10/2017 2:39 AM | 29.5 | 29   | 27.4 | -0.5 | 0.5 | -0.130 | -1.5 |
| 11/10/2017 2:40 AM | 29.6 | 28.3 | 27.1 | -0.5 | 0.6 | -0.127 | -1.5 |
| 11/10/2017 2:41 AM | 29.5 | 28.8 | 27.1 | -0.5 | 0.6 | -0.121 | -1.5 |
| 11/10/2017 2:42 AM | 29.6 | 27.4 | 27.4 | -0.5 | 0.6 | -0.122 | -1.5 |
| 11/10/2017 2:43 AM | 29.6 | 28.3 | 27   | -0.5 | 1.3 | -0.131 | -1.5 |
| 11/10/2017 2:44 AM | 29.5 | 28   | 27   | -0.5 | 2.1 | -0.123 | -1.5 |
| 11/10/2017 2:45 AM | 29.3 | 27.1 | 26.8 | -0.5 | 0.4 | -0.125 | -1.5 |
| 11/10/2017 2:46 AM | 29.2 | 27.8 | 27   | -0.4 | 0.4 | -0.133 | -1.5 |
| 11/10/2017 2:47 AM | 29.4 | 29.4 | 27.2 | -0.3 | 0.4 | -0.141 | -1.5 |
| 11/10/2017 2:48 AM | 29.6 | 26.9 | 27.2 | -0.3 | 0.6 | -0.120 | -1.5 |
| 11/10/2017 2:49 AM | 29.8 | 28.7 | 27.4 | -0.4 | 0.1 | -0.119 | -1.5 |
| 11/10/2017 2:50 AM | 29.7 | 28.8 | 27.3 | -0.4 | 0.7 | -0.131 | -1.5 |
| 11/10/2017 2:51 AM | 29.6 | 29.1 | 27.2 | -0.5 | 0.6 | -0.128 | -1.5 |
| 11/10/2017 2:52 AM | 29.7 | 28.1 | 27.5 | -0.6 | 0.3 | -0.128 | -1.5 |
| 11/10/2017 2:53 AM | 29.9 | 28.3 | 27.5 | -0.6 | 0.5 | -0.125 | -1.5 |
| 11/10/2017 2:54 AM | 29.8 | 28.9 | 27.2 | -0.7 | 0.3 | -0.129 | -1.5 |
| 11/10/2017 2:55 AM | 29.7 | 27.5 | 27.5 | -0.8 | 0.5 | -0.131 | -1.5 |
| 11/10/2017 2:56 AM | 29.6 | 29.9 | 27.2 | -0.8 | 0.6 | -0.124 | -1.5 |
| 11/10/2017 2:57 AM | 29.4 | 27.2 | 27   | -0.8 | 0.6 | -0.130 | -1.5 |
| 11/10/2017 2:58 AM | 29.2 | 28.3 | 27.1 | -0.9 | 1.1 | -0.131 | -1.5 |
| 11/10/2017 2:59 AM | 29.1 | 26.6 | 26.9 | -0.8 | 0.4 | -0.128 | -1.5 |
| 11/10/2017 3:00 AM | 29   | 27.2 | 27.1 | -0.8 | 0.9 | -0.121 | -1.5 |
| 11/10/2017 3:01 AM | 29.2 | 29.1 | 27.2 | -0.8 | 0.3 | -0.127 | -1.5 |
| 11/10/2017 3:02 AM | 29.3 | 26.6 | 27.4 | -0.8 | 0.4 | -0.129 | -1.5 |
| 11/10/2017 3:03 AM | 29.5 | 27.7 | 27.2 | -0.8 | 0.6 | -0.117 | -1.5 |
| 11/10/2017 3:04 AM | 29.5 | 28.1 | 27.2 | -0.8 | 1   | -0.120 | -1.5 |
| 11/10/2017 3:05 AM | 29.4 | 26.4 | 27.2 | -0.8 | 0.7 | -0.130 | -1.5 |

|                    |      |      |      |      |     |        |      |
|--------------------|------|------|------|------|-----|--------|------|
| 11/10/2017 3:06 AM | 29.4 | 26.1 | 27.3 | -0.8 | 0.9 | -0.132 | -1.5 |
| 11/10/2017 3:07 AM | 29.5 | 27.1 | 27.3 | -0.8 | 0.6 | -0.123 | -1.5 |
| 11/10/2017 3:08 AM | 29.6 | 27.6 | 27.3 | -0.8 | 0.3 | -0.122 | -1.5 |
| 11/10/2017 3:09 AM | 29.6 | 27.6 | 27.3 | -0.8 | 0.9 | -0.130 | -1.5 |
| 11/10/2017 3:10 AM | 29.6 | 29.2 | 27.3 | -0.7 | 0.7 | -0.130 | -1.5 |
| 11/10/2017 3:11 AM | 29.6 | 28.9 | 27.3 | -0.7 | 0.7 | -0.118 | -1.5 |
| 11/10/2017 3:12 AM | 29.6 | 28.2 | 27.4 | -0.7 | 0.6 | -0.125 | -1.5 |
| 11/10/2017 3:13 AM | 29.5 | 28.7 | 26.9 | -0.7 | 0.5 | -0.132 | -1.5 |
| 11/10/2017 3:14 AM | 29.5 | 27.9 | 27.1 | -0.7 | 1.1 | -0.124 | -1.5 |
| 11/10/2017 3:15 AM | 29.5 | 27.7 | 27.2 | -0.5 | 0.7 | -0.116 | -1.5 |
| 11/10/2017 3:16 AM | 29.7 | 28.5 | 27.4 | -0.4 | 0.2 | -0.126 | -1.5 |
| 11/10/2017 3:17 AM | 29.7 | 28.3 | 27.3 | -0.3 | 0.4 | -0.128 | -1.5 |
| 11/10/2017 3:18 AM | 29.8 | 28   | 27.2 | -0.3 | 0.9 | -0.121 | -1.5 |
| 11/10/2017 3:19 AM | 29.6 | 27.8 | 27.2 | -0.4 | 1.2 | -0.113 | -1.5 |
| 11/10/2017 3:20 AM | 29.3 | 28.7 | 26.8 | -0.4 | 0.9 | -0.128 | -1.5 |
| 11/10/2017 3:21 AM | 29.3 | 28.1 | 27.2 | -0.4 | 0.5 | -0.136 | -1.5 |
| 11/10/2017 3:22 AM | 29.6 | 27.3 | 27.3 | -0.4 | 0.5 | -0.123 | -1.5 |
| 11/10/2017 3:23 AM | 29.7 | 29.3 | 27.5 | -0.5 | 0.5 | -0.134 | -1.5 |
| 11/10/2017 3:24 AM | 29.8 | 28.2 | 27.3 | -0.5 | 0.9 | -0.132 | -1.5 |
| 11/10/2017 3:25 AM | 29.8 | 26.9 | 27.4 | -0.5 | 0.5 | -0.124 | -1.5 |
| 11/10/2017 3:26 AM | 29.7 | 27.4 | 27.3 | -0.5 | 0.4 | -0.115 | -1.5 |
| 11/10/2017 3:27 AM | 29.6 | 27.9 | 27.4 | -0.6 | 0.7 | -0.128 | -1.5 |
| 11/10/2017 3:28 AM | 29.6 | 27.2 | 27.4 | -0.6 | 0.3 | -0.125 | -1.5 |
| 11/10/2017 3:29 AM | 29.7 | 26.5 | 27.2 | -0.6 | 0.4 | -0.124 | -1.5 |
| 11/10/2017 3:30 AM | 29.6 | 25.8 | 27.3 | -0.6 | 0.6 | -0.120 | -1.5 |
| 11/10/2017 3:31 AM | 29.7 | 27.6 | 27.1 | -0.6 | 0.7 | -0.126 | -1.5 |
| 11/10/2017 3:32 AM | 29.5 | 28.1 | 26.9 | -0.6 | 0.4 | -0.132 | -1.5 |
| 11/10/2017 3:33 AM | 29.4 | 28.1 | 26.9 | -0.5 | 0.6 | -0.119 | -1.5 |
| 11/10/2017 3:34 AM | 29.4 | 28.3 | 27.1 | -0.4 | 0.6 | -0.113 | -1.5 |
| 11/10/2017 3:35 AM | 29.5 | 27.4 | 27   | -0.4 | 0.8 | -0.133 | -1.5 |
| 11/10/2017 3:36 AM | 29.5 | 26.8 | 27   | -0.4 | 1   | -0.128 | -1.5 |
| 11/10/2017 3:37 AM | 29.3 | 26.7 | 27.1 | -0.4 | 0.9 | -0.120 | -1.5 |
| 11/10/2017 3:38 AM | 29.2 | 27   | 26.8 | -0.3 | 0.5 | -0.126 | -1.5 |
| 11/10/2017 3:39 AM | 29.2 | 28.2 | 27.1 | -0.3 | 0.3 | -0.123 | -1.5 |
| 11/10/2017 3:40 AM | 29.2 | 27.7 | 26.6 | -0.3 | 1.1 | -0.115 | -1.5 |
| 11/10/2017 3:41 AM | 29.1 | 28.1 | 26.7 | -0.2 | 1   | -0.121 | -1.5 |
| 11/10/2017 3:42 AM | 29   | 27.8 | 27   | -0.1 | 0.7 | -0.124 | -1.5 |
| 11/10/2017 3:43 AM | 28.9 | 25.9 | 26.5 | -0.1 | 0.8 | -0.126 | -1.5 |
| 11/10/2017 3:44 AM | 29.1 | 27.3 | 27   | -0.1 | 0.4 | -0.118 | -1.5 |
| 11/10/2017 3:45 AM | 29.3 | 27.4 | 27.1 | -0.1 | 0.5 | -0.123 | -1.5 |
| 11/10/2017 3:46 AM | 29.4 | 28.8 | 27   | -0.1 | 0.4 | -0.133 | -1.5 |
| 11/10/2017 3:47 AM | 29.5 | 27.2 | 27   | -0.2 | 0.7 | -0.119 | -1.5 |
| 11/10/2017 3:48 AM | 29.4 | 26.8 | 27.1 | -0.2 | 0.5 | -0.130 | -1.5 |
| 11/10/2017 3:49 AM | 29.2 | 27.6 | 26.8 | -0.2 | 0.7 | -0.131 | -1.5 |
| 11/10/2017 3:50 AM | 29.2 | 27.3 | 27.1 | -0.2 | 0.7 | -0.126 | -1.5 |
| 11/10/2017 3:51 AM | 29.2 | 27.7 | 26.6 | -0.2 | 0.8 | -0.120 | -1.5 |
| 11/10/2017 3:52 AM | 29.2 | 27.3 | 26.8 | -0.2 | 0.7 | -0.127 | -1.5 |

|                    |      |      |      |      |     |        |      |
|--------------------|------|------|------|------|-----|--------|------|
| 11/10/2017 3:53 AM | 29.1 | 28.7 | 27   | -0.2 | 0.5 | -0.128 | -1.5 |
| 11/10/2017 3:54 AM | 29.1 | 27.5 | 26.5 | -0.2 | 1.1 | -0.125 | -1.5 |
| 11/10/2017 3:55 AM | 29   | 29.2 | 26.9 | -0.2 | 0.5 | -0.122 | -1.5 |
| 11/10/2017 3:56 AM | 29.1 | 28.2 | 26.9 | -0.3 | 0.2 | -0.133 | -1.5 |
| 11/10/2017 3:57 AM | 29.2 | 27.3 | 27.1 | -0.3 | 0.3 | -0.126 | -1.5 |
| 11/10/2017 3:58 AM | 29.4 | 27.8 | 27.1 | -0.3 | 0.4 | -0.122 | -1.5 |
| 11/10/2017 3:59 AM | 29.4 | 28.1 | 26.8 | -0.3 | 0.4 | -0.121 | -1.5 |
| 11/10/2017 4:00 AM | 29.5 | 26.9 | 27.1 | -0.4 | 0.6 | -0.131 | -1.5 |
| 11/10/2017 4:01 AM | 29.5 | 26.8 | 26.9 | -0.4 | 0.5 | -0.129 | -1.5 |
| 11/10/2017 4:02 AM | 29.5 | 28.6 | 27.2 | -0.4 | 0.5 | -0.122 | -1.5 |
| 11/10/2017 4:03 AM | 29.5 | 27.1 | 27.1 | -0.4 | 0.3 | -0.123 | -1.5 |
| 11/10/2017 4:04 AM | 29.5 | 29   | 26.8 | -0.4 | 1.5 | -0.133 | -1.5 |
| 11/10/2017 4:05 AM | 29.5 | 27.2 | 27   | -0.3 | 0.8 | -0.122 | -1.5 |
| 11/10/2017 4:06 AM | 29.2 | 26   | 26.7 | -0.3 | 2   | -0.119 | -1.5 |
| 11/10/2017 4:07 AM | 29   | 26.2 | 26.7 | -0.3 | 0.9 | -0.132 | -1.5 |
| 11/10/2017 4:08 AM | 29   | 27.8 | 26.8 | -0.2 | 0.5 | -0.121 | -1.5 |
| 11/10/2017 4:09 AM | 29.2 | 27.6 | 26.9 | -0.2 | 0.7 | -0.124 | -1.5 |
| 11/10/2017 4:10 AM | 29.3 | 26.8 | 26.6 | -0.1 | 0.6 | -0.112 | -1.5 |
| 11/10/2017 4:11 AM | 29.3 | 28   | 26.8 | -0.1 | 0.5 | -0.126 | -1.5 |
| 11/10/2017 4:12 AM | 29.2 | 27.2 | 26.9 | -0.1 | 1   | -0.129 | -1.5 |
| 11/10/2017 4:13 AM | 29.1 | 25.8 | 26.7 | -0.1 | 1.8 | -0.122 | -1.5 |
| 11/10/2017 4:14 AM | 29   | 28.3 | 26.7 | 0.3  | 1.2 | -0.122 | -1.5 |
| 11/10/2017 4:15 AM | 28.9 | 29.8 | 26.8 | 0.5  | 0.7 | -0.130 | -1.5 |
| 11/10/2017 4:16 AM | 29.1 | 27.1 | 27   | 0.6  | 0.5 | -0.120 | -1.5 |
| 11/10/2017 4:17 AM | 29.1 | 26.8 | 27.1 | 0.5  | 0.3 | -0.120 | -1.5 |
| 11/10/2017 4:18 AM | 29.2 | 26.8 | 26.8 | 0.4  | 1   | -0.125 | -1.5 |
| 11/10/2017 4:19 AM | 29.1 | 28   | 27   | 0.2  | 0.9 | -0.133 | -1.5 |
| 11/10/2017 4:20 AM | 29.1 | 27.7 | 27.2 | 0.1  | 0.6 | -0.127 | -1.5 |
| 11/10/2017 4:21 AM | 29.2 | 27.3 | 26.8 | 0.1  | 0.5 | -0.120 | -1.5 |
| 11/10/2017 4:22 AM | 29.2 | 27.9 | 26.6 | 0    | 0.4 | -0.121 | -1.5 |
| 11/10/2017 4:23 AM | 29.3 | 28.3 | 26.8 | 0    | 0.2 | -0.134 | -1.5 |
| 11/10/2017 4:24 AM | 29.3 | 28.7 | 26.7 | -0.1 | 0.7 | -0.119 | -1.5 |
| 11/10/2017 4:25 AM | 29.2 | 28.2 | 27   | -0.1 | 0.7 | -0.123 | -1.5 |
| 11/10/2017 4:26 AM | 29.1 | 24.5 | 27   | -0.2 | 0.7 | -0.135 | -1.5 |
| 11/10/2017 4:27 AM | 29   | 26.3 | 26.9 | -0.2 | 0.8 | -0.127 | -1.5 |
| 11/10/2017 4:28 AM | 29   | 27.3 | 26.6 | -0.2 | 0.8 | -0.124 | -1.5 |
| 11/10/2017 4:29 AM | 29   | 26.6 | 26.8 | 0    | 1   | -0.128 | -1.5 |
| 11/10/2017 4:30 AM | 29   | 27   | 26.6 | 0    | 0.4 | -0.134 | -1.5 |
| 11/10/2017 4:31 AM | 29   | 26.7 | 26.4 | 0    | 1.2 | -0.124 | -1.5 |
| 11/10/2017 4:32 AM | 29   | 26.9 | 26.8 | 0    | 0.5 | -0.120 | -1.5 |
| 11/10/2017 4:33 AM | 29   | 27.5 | 26.6 | 0    | 0.6 | -0.131 | -1.5 |
| 11/10/2017 4:34 AM | 29   | 27.8 | 26.6 | 0    | 0.3 | -0.126 | -1.5 |
| 11/10/2017 4:35 AM | 28.8 | 27.6 | 26.2 | -0.1 | 1.4 | -0.105 | -1.5 |
| 11/10/2017 4:36 AM | 28.6 | 27.7 | 26.4 | 0    | 1.1 | -0.128 | -1.5 |
| 11/10/2017 4:37 AM | 28.7 | 26.7 | 26.6 | 0.3  | 0.3 | -0.130 | -1.5 |
| 11/10/2017 4:38 AM | 28.9 | 27.6 | 26.6 | 0.4  | 0.5 | -0.121 | -1.5 |
| 11/10/2017 4:39 AM | 29.1 | 26.2 | 26.3 | 0.4  | 0.7 | -0.116 | -1.5 |

|                    |      |      |      |      |     |        |      |
|--------------------|------|------|------|------|-----|--------|------|
| 11/10/2017 4:40 AM | 28.8 | 26.1 | 26.3 | 0.3  | 1.5 | -0.124 | -1.5 |
| 11/10/2017 4:41 AM | 28.1 | 25.2 | 24.8 | 0.2  | 6.2 | -0.128 | -1.5 |
| 11/10/2017 4:42 AM | 27.7 | 25.9 | 26.4 | 0.3  | 1.9 | -0.123 | -1.5 |
| 11/10/2017 4:43 AM | 27.9 | 26.9 | 26.5 | 0.4  | 0.4 | -0.124 | -1.5 |
| 11/10/2017 4:44 AM | 28.5 | 27.1 | 26.7 | 0.5  | 1.1 | -0.131 | -1.5 |
| 11/10/2017 4:45 AM | 28.9 | 26.8 | 26.6 | 0.5  | 1   | -0.130 | -1.5 |
| 11/10/2017 4:46 AM | 29   | 27.2 | 26.6 | 0.5  | 0.6 | -0.124 | -1.5 |
| 11/10/2017 4:47 AM | 29   | 27.6 | 26.7 | 0.4  | 0.6 | -0.121 | -1.5 |
| 11/10/2017 4:48 AM | 29.2 | 27.3 | 26.6 | 0.3  | 0.4 | -0.134 | -1.5 |
| 11/10/2017 4:49 AM | 29.3 | 28.1 | 26.6 | 0.2  | 0.3 | -0.126 | -1.5 |
| 11/10/2017 4:50 AM | 29.2 | 27.2 | 26.6 | 0.1  | 0.6 | -0.119 | -1.5 |
| 11/10/2017 4:51 AM | 29.1 | 28   | 26.7 | 0.1  | 1   | -0.131 | -1.5 |
| 11/10/2017 4:52 AM | 29.2 | 27.8 | 26.7 | 0    | 0.7 | -0.131 | -1.5 |
| 11/10/2017 4:53 AM | 29.2 | 28.3 | 27.1 | 0    | 0.8 | -0.125 | -1.5 |
| 11/10/2017 4:54 AM | 29.2 | 28.9 | 26.8 | 0    | 0.6 | -0.124 | -1.5 |
| 11/10/2017 4:55 AM | 29.1 | 27.3 | 26.7 | -0.1 | 0.6 | -0.130 | -1.5 |
| 11/10/2017 4:56 AM | 29   | 25.3 | 26.3 | -0.1 | 0.9 | -0.125 | -1.5 |
| 11/10/2017 4:57 AM | 28.8 | 26.8 | 25.9 | -0.1 | 2.7 | -0.118 | -1.5 |
| 11/10/2017 4:58 AM | 28.4 | 25.3 | 25.5 | 0    | 2.8 | -0.125 | -1.5 |
| 11/10/2017 4:59 AM | 28.2 | 26.4 | 26.2 | 0.1  | 1.2 | -0.130 | -1.5 |
| 11/10/2017 5:00 AM | 28.3 | 28   | 26.7 | 0.3  | 0.8 | -0.127 | -1.5 |
| 11/10/2017 5:01 AM | 28.7 | 27.8 | 26.6 | 0.3  | 0.8 | -0.120 | -1.5 |
| 11/10/2017 5:02 AM | 28.9 | 27.3 | 26.6 | 0.4  | 0.8 | -0.124 | -1.5 |
| 11/10/2017 5:03 AM | 29   | 28.3 | 26.4 | 0.4  | 1.6 | -0.134 | -1.5 |
| 11/10/2017 5:04 AM | 28.8 | 27.1 | 26.3 | 0.4  | 1.5 | -0.129 | -1.5 |
| 11/10/2017 5:05 AM | 28.5 | 26   | 26.1 | 0.4  | 1.3 | -0.125 | -1.5 |
| 11/10/2017 5:06 AM | 28.4 | 27.6 | 26.5 | 0.4  | 0.6 | -0.126 | -1.5 |
| 11/10/2017 5:07 AM | 28.5 | 27.3 | 26.4 | 0.4  | 0.5 | -0.131 | -1.5 |
| 11/10/2017 5:08 AM | 28.7 | 28   | 26.7 | 0.4  | 0.5 | -0.126 | -1.5 |
| 11/10/2017 5:09 AM | 28.9 | 28.3 | 26.5 | 0.3  | 0.8 | -0.123 | -1.5 |
| 11/10/2017 5:10 AM | 29   | 28   | 26.7 | 0.3  | 0.2 | -0.127 | -1.5 |
| 11/10/2017 5:11 AM | 29.1 | 26.9 | 26.8 | 0.3  | 0.5 | -0.136 | -1.5 |
| 11/10/2017 5:12 AM | 29.1 | 27.9 | 26.6 | 0.2  | 0.4 | -0.123 | -1.5 |
| 11/10/2017 5:13 AM | 29.1 | 27.6 | 26.8 | 0.2  | 0.3 | -0.126 | -1.5 |
| 11/10/2017 5:14 AM | 29.2 | 26.9 | 26.7 | 0.2  | 0.3 | -0.132 | -1.5 |
| 11/10/2017 5:15 AM | 29.2 | 28.6 | 26.2 | 0.1  | 0.4 | -0.127 | -1.5 |
| 11/10/2017 5:16 AM | 29.2 | 27.5 | 26.7 | 0.1  | 0.7 | -0.122 | -1.5 |
| 11/10/2017 5:17 AM | 29   | 26.6 | 26.6 | 0.1  | 0.5 | -0.134 | -1.5 |
| 11/10/2017 5:18 AM | 29   | 25.7 | 26.4 | 0.1  | 0.6 | -0.132 | -1.5 |
| 11/10/2017 5:19 AM | 29   | 27.5 | 26.3 | 0.1  | 0.6 | -0.123 | -1.5 |
| 11/10/2017 5:20 AM | 28.8 | 25.8 | 25.9 | 0    | 1.2 | -0.124 | -1.5 |
| 11/10/2017 5:21 AM | 28.6 | 26.5 | 26.2 | 0.1  | 0.4 | -0.137 | -1.5 |
| 11/10/2017 5:22 AM | 28.5 | 26.9 | 26.4 | 0.2  | 0.5 | -0.134 | -1.5 |
| 11/10/2017 5:23 AM | 28.8 | 27.6 | 26.1 | 0.2  | 0.6 | -0.117 | -1.5 |
| 11/10/2017 5:24 AM | 28.9 | 26.3 | 26.7 | 0.2  | 0.3 | -0.126 | -1.5 |
| 11/10/2017 5:25 AM | 28.8 | 27   | 26.3 | 0.2  | 0.6 | -0.132 | -1.5 |
| 11/10/2017 5:26 AM | 28.7 | 27.7 | 26.4 | 0.1  | 0.4 | -0.133 | -1.5 |



|                    |      |      |      |      |     |        |      |
|--------------------|------|------|------|------|-----|--------|------|
| 11/10/2017 5:27 AM | 28.7 | 27.1 | 26.3 | 0.1  | 0.5 | -0.119 | -1.5 |
| 11/10/2017 5:28 AM | 28.8 | 27.8 | 26.2 | 0    | 1.3 | -0.128 | -1.5 |
| 11/10/2017 5:29 AM | 28.7 | 26.3 | 26.4 | 0    | 0.4 | -0.132 | -1.5 |
| 11/10/2017 5:30 AM | 28.6 | 27.9 | 26.3 | 0    | 0.9 | -0.133 | -1.5 |
| 11/10/2017 5:31 AM | 28.6 | 26.6 | 25.9 | 0    | 1.5 | -0.127 | -1.5 |
| 11/10/2017 5:32 AM | 28.5 | 27.7 | 26.3 | 0    | 1   | -0.136 | -1.5 |
| 11/10/2017 5:33 AM | 28.4 | 25.9 | 26   | 0    | 0.8 | -0.141 | -1.5 |
| 11/10/2017 5:34 AM | 28.3 | 25.9 | 25.8 | 0    | 0.3 | -0.117 | -1.5 |
| 11/10/2017 5:35 AM | 28.4 | 27.5 | 26.1 | 0    | 0.7 | -0.129 | -1.5 |
| 11/10/2017 5:36 AM | 28.5 | 27.9 | 26.2 | -0.1 | 0.8 | -0.138 | -1.5 |
| 11/10/2017 5:37 AM | 28.7 | 26.9 | 26.1 | 0    | 1   | -0.122 | -1.5 |
| 11/10/2017 5:38 AM | 28.8 | 26.9 | 26.5 | 0    | 0.3 | -0.125 | -1.5 |
| 11/10/2017 5:39 AM | 28.9 | 26.1 | 26.4 | 0    | 0.4 | -0.137 | -1.5 |
| 11/10/2017 5:40 AM | 28.9 | 26.4 | 26.5 | -0.1 | 0.7 | -0.132 | -1.5 |
| 11/10/2017 5:41 AM | 28.8 | 26.9 | 26.3 | -0.1 | 0.3 | -0.128 | -1.5 |
| 11/10/2017 5:42 AM | 28.7 | 26.3 | 26.3 | -0.1 | 0.2 | -0.130 | -1.5 |
| 11/10/2017 5:43 AM | 28.6 | 26.3 | 26.2 | -0.2 | 0.5 | -0.132 | -1.5 |
| 11/10/2017 5:44 AM | 28.5 | 27.4 | 25.9 | -0.2 | 0.4 | -0.136 | -1.5 |
| 11/10/2017 5:45 AM | 28.4 | 27.2 | 26.2 | -0.2 | 0.5 | -0.129 | -1.5 |
| 11/10/2017 5:46 AM | 28.4 | 25.7 | 26.2 | -0.2 | 0.3 | -0.123 | -1.5 |
| 11/10/2017 5:47 AM | 28.3 | 27.2 | 26.2 | -0.2 | 0.7 | -0.133 | -1.5 |
| 11/10/2017 5:48 AM | 28.2 | 25.3 | 25.7 | -0.2 | 1.4 | -0.130 | -1.5 |
| 11/10/2017 5:49 AM | 27.9 | 26.3 | 25.5 | -0.2 | 1.5 | -0.129 | -1.5 |
| 11/10/2017 5:50 AM | 27.9 | 25.6 | 26.1 | -0.1 | 0.9 | -0.127 | -1.5 |
| 11/10/2017 5:51 AM | 28.1 | 25.8 | 26   | 0    | 0.9 | -0.134 | -1.5 |
| 11/10/2017 5:52 AM | 28.3 | 25   | 26.1 | 0    | 0.3 | -0.138 | -1.5 |
| 11/10/2017 5:53 AM | 28.4 | 26.3 | 26   | 0    | 0.7 | -0.128 | -1.5 |
| 11/10/2017 5:54 AM | 28.4 | 26.7 | 26.1 | 0    | 0.6 | -0.124 | -1.5 |
| 11/10/2017 5:55 AM | 28.4 | 27.6 | 26.3 | 0    | 0.8 | -0.142 | -1.5 |
| 11/10/2017 5:56 AM | 28.4 | 24.3 | 26.1 | 0    | 0.6 | -0.133 | -1.5 |
| 11/10/2017 5:57 AM | 28.5 | 25.2 | 26.3 | 0    | 0.4 | -0.124 | -1.5 |
| 11/10/2017 5:58 AM | 28.5 | 26.8 | 26.3 | 0    | 0.5 | -0.132 | -1.5 |
| 11/10/2017 5:59 AM | 28.5 | 26.1 | 26.2 | -0.1 | 0.5 | -0.133 | -1.5 |
| 11/10/2017 6:00 AM | 28.4 | 26.6 | 26.3 | -0.1 | 0.8 | -0.132 | -1.5 |
| 11/10/2017 6:01 AM | 28.4 | 26.3 | 26   | -0.1 | 0.8 | -0.120 | -1.5 |
| 11/10/2017 6:02 AM | 28.3 | 25.8 | 25.8 | -0.1 | 1.5 | -0.136 | -1.5 |
| 11/10/2017 6:03 AM | 28.2 | 26.2 | 25.6 | -0.1 | 1.8 | -0.136 | -1.5 |
| 11/10/2017 6:04 AM | 28.1 | 25   | 25.2 | 0    | 2.6 | -0.129 | -1.5 |
| 11/10/2017 6:05 AM | 27.4 | 25.3 | 24.3 | 0.1  | 6.4 | -0.125 | -1.5 |
| 11/10/2017 6:06 AM | 27.1 | 25.2 | 24.9 | 0.4  | 3.7 | -0.132 | -1.5 |
| 11/10/2017 6:07 AM | 26.7 | 23.5 | 24.6 | 0.6  | 5   | -0.135 | -1.5 |
| 11/10/2017 6:08 AM | 27.1 | 27   | 25.5 | 0.7  | 1.7 | -0.128 | -1.5 |
| 11/10/2017 6:09 AM | 27.2 | 26   | 25.3 | 0.8  | 0.7 | -0.133 | -1.5 |
| 11/10/2017 6:10 AM | 27.6 | 25.5 | 25.6 | 1    | 0.7 | -0.127 | -1.5 |
| 11/10/2017 6:11 AM | 27.9 | 26.1 | 25.9 | 1    | 0.5 | -0.130 | -1.5 |
| 11/10/2017 6:12 AM | 28.4 | 28.1 | 26   | 1    | 0.4 | -0.129 | -1.5 |
| 11/10/2017 6:13 AM | 28.6 | 25.7 | 25.9 | 0.9  | 0.6 | -0.128 | -1.5 |

|                    |      |      |      |     |     |        |      |
|--------------------|------|------|------|-----|-----|--------|------|
| 11/10/2017 6:14 AM | 28.4 | 25.2 | 25.7 | 0.8 | 1   | -0.133 | -1.5 |
| 11/10/2017 6:15 AM | 28.2 | 26.8 | 26   | 0.7 | 0.3 | -0.134 | -1.5 |
| 11/10/2017 6:16 AM | 28.2 | 25.2 | 26   | 0.6 | 0.3 | -0.124 | -1.5 |
| 11/10/2017 6:17 AM | 28.3 | 26.5 | 25.8 | 0.5 | 0.7 | -0.134 | -1.5 |
| 11/10/2017 6:18 AM | 28.3 | 25.5 | 25.9 | 0.5 | 0.5 | -0.147 | -1.5 |
| 11/10/2017 6:19 AM | 28.3 | 27.6 | 26.1 | 0.4 | 0.6 | -0.124 | -1.5 |
| 11/10/2017 6:20 AM | 28.5 | 25.5 | 26.2 | 0.3 | 0.8 | -0.130 | -1.5 |
| 11/10/2017 6:21 AM | 28.5 | 27.3 | 26   | 0.2 | 0.6 | -0.131 | -1.5 |
| 11/10/2017 6:22 AM | 28.4 | 26.4 | 25.8 | 0.2 | 0.5 | -0.141 | -1.5 |
| 11/10/2017 6:23 AM | 28.2 | 26.8 | 26.1 | 0.2 | 0.4 | -0.129 | -1.5 |
| 11/10/2017 6:24 AM | 28.1 | 26.2 | 25.5 | 0.1 | 1   | -0.132 | -1.5 |
| 11/10/2017 6:25 AM | 28   | 26.5 | 25.7 | 0.1 | 0.7 | -0.134 | -1.5 |
| 11/10/2017 6:26 AM | 28   | 24.5 | 25.6 | 0.3 | 0.3 | -0.140 | -1.5 |
| 11/10/2017 6:27 AM | 27.9 | 26.3 | 25.6 | 0.3 | 0.4 | -0.129 | -1.5 |
| 11/10/2017 6:28 AM | 28   | 26.6 | 25.8 | 0.3 | 0.3 | -0.124 | -1.5 |
| 11/10/2017 6:29 AM | 27.9 | 24.7 | 25.4 | 0.3 | 1   | -0.136 | -1.5 |
| 11/10/2017 6:30 AM | 27.8 | 24.4 | 25.2 | 0.2 | 1   | -0.132 | -1.5 |
| 11/10/2017 6:31 AM | 27.6 | 24.8 | 25.4 | 0.1 | 0.7 | -0.129 | -1.5 |
| 11/10/2017 6:32 AM | 27.6 | 25   | 25.6 | 0.1 | 0.7 | -0.131 | -1.5 |
| 11/10/2017 6:33 AM | 27.5 | 26.7 | 25.2 | 0.2 | 2.3 | -0.138 | -1.5 |
| 11/10/2017 6:34 AM | 27.3 | 24.8 | 24.9 | 0.2 | 3.7 | -0.131 | -1.5 |
| 11/10/2017 6:35 AM | 27   | 25.9 | 24.9 | 0.2 | 1.2 | -0.125 | -1.5 |
| 11/10/2017 6:36 AM | 27.1 | 25.8 | 25.4 | 0.3 | 0.7 | -0.138 | -1.5 |
| 11/10/2017 6:37 AM | 27.4 | 25.5 | 25.3 | 0.7 | 1   | -0.136 | -1.5 |
| 11/10/2017 6:38 AM | 27.6 | 25.5 | 25.5 | 0.6 | 0.3 | -0.132 | -1.5 |
| 11/10/2017 6:39 AM | 27.7 | 27.5 | 25.2 | 0.5 | 0.9 | -0.134 | -1.5 |
| 11/10/2017 6:40 AM | 27.8 | 25.2 | 25.4 | 0.4 | 0.6 | -0.137 | -1.5 |
| 11/10/2017 6:41 AM | 27.8 | 27   | 25.6 | 0.4 | 0.3 | -0.129 | -1.5 |
| 11/10/2017 6:42 AM | 27.8 | 25.7 | 25.4 | 0.3 | 0.5 | -0.135 | -1.5 |
| 11/10/2017 6:43 AM | 27.7 | 25.2 | 25.6 | 0.2 | 0.8 | -0.137 | -1.5 |
| 11/10/2017 6:44 AM | 27.8 | 26.8 | 25.7 | 0.3 | 0.4 | -0.131 | -1.5 |
| 11/10/2017 6:45 AM | 27.8 | 27.2 | 25.6 | 0.3 | 0.4 | -0.127 | -1.5 |
| 11/10/2017 6:46 AM | 27.8 | 25.6 | 25.4 | 0.2 | 0.6 | -0.134 | -1.5 |
| 11/10/2017 6:47 AM | 27.7 | 27.2 | 25.6 | 0.2 | 0.5 | -0.138 | -1.5 |
| 11/10/2017 6:48 AM | 27.6 | 26.3 | 25.4 | 0.2 | 0.5 | -0.131 | -1.5 |
| 11/10/2017 6:49 AM | 27.6 | 25.7 | 25.5 | 0.1 | 0.4 | -0.136 | -1.5 |
| 11/10/2017 6:50 AM | 27.6 | 25.7 | 25.7 | 0.1 | 0.8 | -0.133 | -1.5 |
| 11/10/2017 6:51 AM | 27.7 | 25.8 | 25.3 | 0   | 0.9 | -0.139 | -1.5 |
| 11/10/2017 6:52 AM | 27.5 | 25.4 | 25   | 0   | 0.9 | -0.135 | -1.5 |
| 11/10/2017 6:53 AM | 27.3 | 26.2 | 25.2 | 0.1 | 0.6 | -0.129 | -1.5 |
| 11/10/2017 6:54 AM | 27.1 | 26.3 | 25.2 | 0.1 | 0.4 | -0.136 | -1.5 |
| 11/10/2017 6:55 AM | 27.1 | 25.6 | 25.1 | 0.1 | 0.8 | -0.136 | -1.5 |
| 11/10/2017 6:56 AM | 27.3 | 24.9 | 25.5 | 0   | 1   | -0.132 | -1.5 |
| 11/10/2017 6:57 AM | 27.3 | 25.6 | 25.1 | 0   | 0.4 | -0.130 | -1.5 |
| 11/10/2017 6:58 AM | 27.4 | 25.3 | 25.2 | 0   | 0.5 | -0.139 | -1.5 |
| 11/10/2017 6:59 AM | 27.4 | 26.8 | 24.7 | 0.1 | 1.2 | -0.140 | -1.5 |
| 11/10/2017 7:00 AM | 27.3 | 24.1 | 24.9 | 0.1 | 1   | -0.131 | -1.5 |

|                    |      |      |      |     |     |        |      |
|--------------------|------|------|------|-----|-----|--------|------|
| 11/10/2017 7:01 AM | 27.3 | 24.6 | 25.1 | 0.1 | 0.4 | -0.129 | -1.5 |
| 11/10/2017 7:02 AM | 27.4 | 25.2 | 24.9 | 0.1 | 0.6 | -0.139 | -1.5 |
| 11/10/2017 7:03 AM | 27.4 | 25.6 | 24.8 | 0.1 | 0.9 | -0.133 | -1.5 |
| 11/10/2017 7:04 AM | 27.2 | 26.2 | 24.9 | 0.2 | 0.9 | -0.122 | -1.5 |
| 11/10/2017 7:05 AM | 27.3 | 26.4 | 25.2 | 0.3 | 0.5 | -0.129 | -1.5 |
| 11/10/2017 7:06 AM | 27.4 | 26.2 | 25   | 0.3 | 0.6 | -0.137 | -1.5 |
| 11/10/2017 7:07 AM | 27.5 | 25.4 | 25.2 | 0.3 | 1.5 | -0.132 | -1.5 |
| 11/10/2017 7:08 AM | 27.5 | 26.2 | 25.1 | 0.3 | 0.6 | -0.129 | -1.5 |
| 11/10/2017 7:09 AM | 27.4 | 25.9 | 25.4 | 0.3 | 0.7 | -0.143 | -1.5 |
| 11/10/2017 7:10 AM | 27.6 | 24.9 | 25.1 | 0.3 | 0.6 | -0.138 | -1.5 |
| 11/10/2017 7:11 AM | 27.6 | 27   | 25.2 | 0.3 | 0.7 | -0.133 | -1.5 |
| 11/10/2017 7:12 AM | 27.7 | 26.1 | 25.3 | 0.3 | 0.5 | -0.128 | -1.5 |
| 11/10/2017 7:13 AM | 27.4 | 24.1 | 24.1 | 0.5 | 4.7 | -0.130 | -1.5 |
| 11/10/2017 7:14 AM | 26.9 | 25.4 | 24.7 | 0.5 | 2.7 | -0.139 | -1.5 |
| 11/10/2017 7:15 AM | 26.7 | 24.6 | 25.3 | 0.7 | 0.9 | -0.132 | -1.5 |
| 11/10/2017 7:16 AM | 26.9 | 24.8 | 25.3 | 0.7 | 0.5 | -0.131 | -1.5 |
| 11/10/2017 7:17 AM | 27.6 | 25.6 | 25.6 | 0.7 | 0.6 | -0.130 | -1.5 |
| 11/10/2017 7:18 AM | 27.8 | 25.5 | 25.3 | 0.7 | 1.6 | -0.135 | -1.5 |
| 11/10/2017 7:19 AM | 27.8 | 26.9 | 25.7 | 0.7 | 0.5 | -0.139 | -1.5 |
| 11/10/2017 7:20 AM | 27.9 | 25.4 | 25.4 | 0.7 | 0.4 | -0.127 | -1.5 |
| 11/10/2017 7:21 AM | 27.9 | 25.8 | 25.7 | 0.7 | 0.3 | -0.130 | -1.5 |
| 11/10/2017 7:22 AM | 27.8 | 26.4 | 25.4 | 0.7 | 0.5 | -0.141 | -1.5 |
| 11/10/2017 7:23 AM | 27.8 | 24.6 | 25.6 | 0.7 | 0.5 | -0.134 | -1.5 |
| 11/10/2017 7:24 AM | 27.7 | 25.5 | 25.5 | 0.8 | 0.6 | -0.130 | -1.5 |
| 11/10/2017 7:25 AM | 27.8 | 25.1 | 25.7 | 0.8 | 0.4 | -0.138 | -1.5 |
| 11/10/2017 7:26 AM | 27.8 | 25.5 | 25.3 | 0.7 | 0.8 | -0.141 | -1.5 |
| 11/10/2017 7:27 AM | 27.8 | 25.7 | 25.7 | 0.7 | 0.7 | -0.131 | -1.5 |
| 11/10/2017 7:28 AM | 27.8 | 25.8 | 25.5 | 0.7 | 0.8 | -0.131 | -1.5 |
| 11/10/2017 7:29 AM | 27.8 | 25.7 | 25.8 | 0.6 | 0.7 | -0.141 | -1.5 |
| 11/10/2017 7:30 AM | 27.8 | 26.4 | 25.6 | 0.6 | 0.9 | -0.134 | -1.5 |
| 11/10/2017 7:31 AM | 27.8 | 27.2 | 25.4 | 0.6 | 1.4 | -0.129 | -1.5 |
| 11/10/2017 7:32 AM | 27.7 | 25   | 25.6 | 0.6 | 1.9 | -0.136 | -1.5 |
| 11/10/2017 7:33 AM | 27.6 | 24.8 | 25.2 | 0.6 | 2.4 | -0.142 | -1.5 |
| 11/10/2017 7:34 AM | 27.2 | 24.2 | 24.7 | 0.7 | 5.6 | -0.138 | -1.5 |
| 11/10/2017 7:35 AM | 27   | 27.2 | 25.2 | 0.7 | 1.7 | -0.130 | -1.5 |
| 11/10/2017 7:36 AM | 27.1 | 26.3 | 24.9 | 0.8 | 1.5 | -0.134 | -1.5 |
| 11/10/2017 7:37 AM | 27.4 | 25.5 | 25.3 | 0.8 | 2.7 | -0.137 | -1.5 |
| 11/10/2017 7:38 AM | 27.3 | 24.9 | 24.8 | 0.7 | 5.4 | -0.128 | -1.5 |
| 11/10/2017 7:39 AM | 27   | 25.6 | 24.5 | 0.8 | 5.4 | -0.133 | -1.5 |
| 11/10/2017 7:40 AM | 26.6 | 24.7 | 24.7 | 1   | 3.6 | -0.140 | -1.5 |
| 11/10/2017 7:41 AM | 26.5 | 25.1 | 25.1 | 1.2 | 2.4 | -0.135 | -1.5 |
| 11/10/2017 7:42 AM | 26.6 | 25   | 24.7 | 1.4 | 2.3 | -0.127 | -1.5 |
| 11/10/2017 7:43 AM | 27   | 25.2 | 24.9 | 1.5 | 2.8 | -0.134 | -1.5 |
| 11/10/2017 7:44 AM | 27   | 24.3 | 24.8 | 1.6 | 3.2 | -0.139 | -1.5 |
| 11/10/2017 7:45 AM | 27   | 26.4 | 24.9 | 1.7 | 2.3 | -0.134 | -1.5 |
| 11/10/2017 7:46 AM | 27.1 | 26.8 | 25.3 | 1.8 | 0.6 | -0.129 | -1.5 |
| 11/10/2017 7:47 AM | 27.3 | 26.4 | 25.4 | 1.8 | 0.9 | -0.133 | -1.5 |

|                    |      |      |      |      |      |        |       |
|--------------------|------|------|------|------|------|--------|-------|
| 11/10/2017 7:48 AM | 27.5 | 25.4 | 25.2 | 1.8  | 0.8  | -0.139 | -1.5  |
| 11/10/2017 7:49 AM | 27.4 | 24.4 | 24.5 | 1.8  | 5.4  | -0.130 | -1.5  |
| 11/10/2017 7:50 AM | 27.2 | 24.8 | 25.2 | 1.7  | 4.8  | -0.128 | -1.5  |
| 11/10/2017 7:51 AM | 26.9 | 24.4 | 24.3 | 1.7  | 5.7  | -0.136 | -1.5  |
| 11/10/2017 7:52 AM | 26.4 | 24   | 24.2 | 1.7  | 6.2  | -0.142 | -1.5  |
| 11/10/2017 7:53 AM | 26.3 | 26.4 | 24.6 | 1.8  | 1.9  | -0.134 | -1.5  |
| 11/10/2017 7:54 AM | 26.3 | 23.8 | 24.6 | 1.9  | 3.2  | -0.133 | -1.5  |
| 11/10/2017 7:55 AM | 26.9 | 25.7 | 25.3 | 2.1  | 1    | -0.142 | -1.5  |
| 11/10/2017 7:56 AM | 27.3 | 24.9 | 24.9 | 2.2  | 2.1  | -0.141 | -1.5  |
| 11/10/2017 7:57 AM | 27.1 | 24.6 | 24.1 | 2.2  | 5.6  | -0.131 | -1.5  |
| 11/10/2017 7:58 AM | 26.7 | 25.6 | 24.4 | 2.2  | 5.3  | -0.135 | -1.5  |
| 11/10/2017 7:59 AM | 26.5 | 24.8 | 25.1 | 2.2  | 2.3  | -0.142 | -1.5  |
| 11/10/2017 8:00 AM | 26.7 | 25.6 | 25.1 | 2.2  | 1.3  | -0.139 | -1.5  |
| 11/10/2017 8:01 AM | 27.2 | 26.5 | 24.7 | 2.2  | 2.2  | -0.128 | -1.5  |
| 11/10/2017 8:02 AM | 27.2 | 26.6 | 25.5 | 2.3  | 2.1  | -0.133 | -1.5  |
| 11/10/2017 8:03 AM | 27.5 | 25.1 | 25.8 | 2.3  | 1    | -0.144 | -1.5  |
| 11/10/2017 8:04 AM | 27.6 | 26.3 | 25.7 | 2.2  | 1.3  | -0.136 | -1.5  |
| 11/10/2017 8:05 AM | 27.8 | 25.4 | 25.2 | 2.1  | 2.2  | -0.129 | -1.5  |
| 11/10/2017 8:06 AM | 27.7 | 28.1 | 25.3 | 2.1  | 1.4  | -0.138 | -1.5  |
| 11/10/2017 8:07 AM | 27.7 | 27.6 | 25.5 | 2    | 0.6  | -0.140 | -1.5  |
| 11/10/2017 8:08 AM | 27.7 | 25.1 | 25.2 | 1.9  | 2.6  | -0.137 | -1.5  |
| 11/10/2017 8:09 AM | 27.5 | 24   | 25.3 | 1.8  | 6.7  | -0.136 | -1.5  |
| 11/10/2017 8:10 AM | 27.3 | 26.5 | 25.3 | 1.8  | 2.9  | -0.139 | -1.5  |
| 11/10/2017 8:11 AM | 27.2 | 26.4 | 25.3 | 1.9  | 2.2  | -0.142 | -1.5  |
| 11/10/2017 8:12 AM | 27.4 | 25.9 | 25.8 | 1.9  | 0.6  | -0.134 | -1.5  |
| 11/10/2017 8:13 AM | 27.8 | 26.6 | 25.8 | 1.9  | 1.4  | -0.131 | -1.5  |
| 11/10/2017 8:14 AM | 28.1 | 25.3 | 25.8 | 1.9  | 0.9  | -0.143 | -1.5  |
| 11/10/2017 8:15 AM | 28.2 | 25.8 | 25.9 | 1.9  | 1.1  | -0.138 | -1.5  |
| 11/10/2017 8:16 AM | 28   | 25   | 24.7 | 1.8  | 6.7  | -0.135 | -1.5  |
| 11/10/2017 8:17 AM | 27.5 | 25.3 | 24.7 | 1.7  | 7    | -0.143 | -1.5  |
| 11/10/2017 8:18 AM | 26.6 | 25.7 | 23.8 | 1.7  | 8.5  | -0.146 | -1.5  |
| 11/10/2017 8:19 AM | 26.3 | 25.4 | 25   | 1.8  | 4.2  | -0.137 | -1.5  |
| 11/10/2017 8:20 AM | 26.1 | 24.2 | 23.8 | 1.9  | 6.3  | -0.134 | -1.5  |
| 11/10/2017 8:21 AM | 25.6 | 22.9 | 23.7 | 2.1  | 9.1  | -0.142 | -1.5  |
| 11/10/2017 8:22 AM | 25.5 | 24.2 | 25.2 | 2.3  | 2.2  | -0.142 | -1.5  |
| 11/10/2017 8:23 AM | 25.5 | 21.7 | 23.7 | 2.3  | 9.2  | -0.145 | -1.5  |
| 11/10/2017 8:24 AM | 25.2 | 21.7 | 20.5 | 2.1  | 15.9 | -0.135 | -1.5  |
| 11/10/2017 8:25 AM | 24.7 | 24.3 | 18.1 | 1.7  | 4.6  | -0.144 | -1.5  |
| 11/10/2017 8:26 AM | 24.4 | 24   | 17   | 0.4  | 7.6  | -0.143 | -1.5  |
| 11/10/2017 8:27 AM | 25.1 | 24.4 | 16.7 | -0.9 | 5.4  | -0.141 | -1.5  |
| 11/10/2017 8:28 AM | 25.2 | 23.1 | 15.8 | -1.9 | 6.6  | -0.141 | -1.5  |
| 11/10/2017 8:29 AM | 25.4 | 22.8 | 16.5 | -2.5 | 4.4  | -0.151 | -1.5  |
| 11/10/2017 8:30 AM | 25.3 | 24.2 | 17   | -2.8 | 7.9  | -0.142 | -1.5  |
| 11/10/2017 8:31 AM | 25.2 | 24.3 | 16.2 | -2.9 | 9.3  | -0.138 | -1.5  |
| 11/10/2017 8:32 AM | 25   | 23.6 | 15.9 | -3   | 12.3 | -0.157 | -1.5  |
| 11/10/2017 8:33 AM | 24.6 | 23.9 | 16.2 | -0.9 | 10   | -0.144 | 39.4  |
| 11/10/2017 8:34 AM | 24.9 | 24.3 | 16.2 | 0    | 10   | -0.137 | 101.5 |

|                    |      |      |      |      |       |        |      |
|--------------------|------|------|------|------|-------|--------|------|
| 11/10/2017 8:35 AM | 24.7 | 24.4 | 21.3 | 0    | 8.5   | -0.141 | 79.7 |
| 11/10/2017 8:36 AM | 25.4 | 24   | 23.7 | 0.2  | 2.6   | -0.144 | 58.2 |
| 11/10/2017 8:37 AM | 25.9 | 25.5 | 24.6 | 0.2  | 5.1   | -0.137 | 40.3 |
| 11/10/2017 8:38 AM | 26.2 | 23.5 | 24.6 | 0.3  | 0.8   | -0.138 | 26.9 |
| 11/10/2017 8:39 AM | 25.4 | 24.2 | 24.7 | 2.1  | 0.5   | -0.147 | 17.7 |
| 11/10/2017 8:40 AM | 24   | 24.1 | 24.2 | 2.7  | 0.7   | -0.144 | 11.8 |
| 11/10/2017 8:41 AM | 22.8 | 24.3 | 23.6 | 3    | 0.6   | -0.146 | 7.6  |
| 11/10/2017 8:42 AM | 21.9 | 23.8 | 22.8 | 3.3  | 106.6 | -0.137 | 4.8  |
| 11/10/2017 8:43 AM | 21.6 | 24.5 | 24.3 | 4    | 96.2  | -0.136 | 3.2  |
| 11/10/2017 8:44 AM | 21.4 | 24.2 | 23.9 | 4.5  | 77.6  | -0.144 | 2.7  |
| 11/10/2017 8:45 AM | 21.3 | 22.7 | 23.8 | 4.7  | 76.9  | -0.134 | 2.4  |
| 11/10/2017 8:46 AM | 21.3 | 24.3 | 24.4 | 4.7  | 76.9  | -0.135 | 2.1  |
| 11/10/2017 8:47 AM | 21.3 | 23.1 | 23.8 | 4.6  | 77.4  | -0.138 | 2    |
| 11/10/2017 8:48 AM | 21.7 | 24.7 | 23.7 | 4.4  | 79.6  | -0.147 | 1.8  |
| 11/10/2017 8:49 AM | 21.8 | 24.1 | 23.9 | 4.2  | 82.4  | -0.132 | 1.8  |
| 11/10/2017 8:50 AM | 21.3 | 23   | 22.9 | 4    | 84.8  | -0.129 | 1.7  |
| 11/10/2017 8:51 AM | 20.9 | 25.2 | 23.4 | 4.1  | 86.8  | -0.142 | 1.6  |
| 11/10/2017 8:52 AM | 20.8 | 25.6 | 23.8 | 4.2  | 89.9  | -0.133 | 1.6  |
| 11/10/2017 8:53 AM | 21.1 | 20.9 | 23.5 | 4.2  | 92.3  | -0.138 | 1.6  |
| 11/10/2017 8:54 AM | 21.5 | 24.5 | 24.7 | 4.2  | 93.5  | -0.140 | 1.5  |
| 11/10/2017 8:55 AM | 21.9 | 23.2 | 23.9 | 4.2  | 95.2  | -0.145 | 1.5  |
| 11/10/2017 8:56 AM | 21.9 | 22.8 | 23   | 4.5  | 96.7  | -0.144 | 1.4  |
| 11/10/2017 8:57 AM | 21.8 | 22.8 | 23.5 | 5.5  | 97.8  | -0.136 | 1.4  |
| 11/10/2017 8:58 AM | 21.4 | 26.7 | 24.3 | 6.5  | 98.1  | -0.128 | 1.4  |
| 11/10/2017 8:59 AM | 21.7 | 22.1 | 24.2 | 6.9  | 98.8  | -0.142 | 1.4  |
| 11/10/2017 9:00 AM | 21.8 | 23.5 | 24.2 | 7.8  | 99.9  | -0.139 | 1.4  |
| 11/10/2017 9:01 AM | 22   | 25.9 | 24.9 | 8    | 87.2  | -0.136 | 1.3  |
| 11/10/2017 9:02 AM | 22.5 | 24   | 24.5 | 7.4  | 16.3  | -0.138 | 1.3  |
| 11/10/2017 9:03 AM | 23.1 | 24.2 | 24.9 | 6.5  | 21.9  | -0.143 | 1.2  |
| 11/10/2017 9:04 AM | 23.7 | 24.3 | 24.9 | 5.6  | 25.3  | -0.144 | 1.2  |
| 11/10/2017 9:05 AM | 24   | 23.8 | 24.6 | 5.1  | 28.2  | -0.128 | 1.2  |
| 11/10/2017 9:06 AM | 23.8 | 24.9 | 24.6 | 5.2  | 29.5  | -0.143 | 1.1  |
| 11/10/2017 9:07 AM | 23.6 | 24.1 | 24.9 | 5    | 30.3  | -0.144 | 1.1  |
| 11/10/2017 9:08 AM | 23   | 23.7 | 24.1 | 4.6  | 29.8  | -0.135 | 1.2  |
| 11/10/2017 9:09 AM | 23.5 | 25.4 | 23   | 6.4  | 10.9  | -0.137 | 1.2  |
| 11/10/2017 9:10 AM | 24.5 | 24.9 | 21.6 | 31.3 | 5.8   | -0.148 | 1.1  |
| 11/10/2017 9:11 AM | 25.8 | 25   | 20.2 | 53.5 | 3.3   | -0.151 | 1.1  |
| 11/10/2017 9:12 AM | 26.6 | 25.4 | 19.9 | 64.2 | 5.1   | -0.145 | 1.1  |
| 11/10/2017 9:13 AM | 26.6 | 24.1 | 19.6 | 65.9 | 4     | -0.146 | 1.1  |
| 11/10/2017 9:14 AM | 26.5 | 23.6 | 19.7 | 66.5 | 3.1   | -0.153 | 1.2  |
| 11/10/2017 9:15 AM | 26.3 | 23.1 | 19.5 | 66.9 | 9.3   | -0.138 | 1.2  |
| 11/10/2017 9:16 AM | 26.5 | 25.1 | 20   | 67.1 | 3.2   | -0.141 | 1.2  |
| 11/10/2017 9:17 AM | 26.6 | 23.7 | 19.8 | 67   | 5.9   | -0.148 | 1.3  |
| 11/10/2017 9:18 AM | 26.4 | 25.3 | 20.1 | 67.1 | 4.9   | -0.147 | 1.2  |
| 11/10/2017 9:19 AM | 26.4 | 26.5 | 20   | 71   | 3.6   | -0.139 | 1.3  |
| 11/10/2017 9:20 AM | 26.2 | 25.7 | 20.2 | 79.1 | 4.3   | -0.137 | 1.3  |
| 11/10/2017 9:21 AM | 26.4 | 25.7 | 19.5 | 56.3 | 8     | -0.145 | 1.3  |

|                     |      |      |      |      |      |        |     |
|---------------------|------|------|------|------|------|--------|-----|
| 11/10/2017 9:22 AM  | 26.3 | 25.3 | 23.3 | 40.1 | 4.2  | 10.892 | 1.3 |
| 11/10/2017 9:23 AM  | 26.5 | 26   | 25.1 | 27.8 | 6.1  | 33.362 | 1.3 |
| 11/10/2017 9:24 AM  | 27.1 | 26   | 25.7 | 22.4 | 4.9  | 33.438 | 1.2 |
| 11/10/2017 9:25 AM  | 27.2 | 26.4 | 25.3 | 16.4 | 12.3 | 33.423 | 1.2 |
| 11/10/2017 9:26 AM  | 27.5 | 25.8 | 26.8 | 12.3 | 6.3  | 33.460 | 1.2 |
| 11/10/2017 9:27 AM  | 27.8 | 26.7 | 26.9 | 9.7  | 2.9  | 33.453 | 1.1 |
| 11/10/2017 9:28 AM  | 28   | 25   | 25   | 7.9  | 4.7  | 30.698 | 1.1 |
| 11/10/2017 9:29 AM  | 27.6 | 25.8 | 25.1 | 6.7  | 2.8  | 4.323  | 1.1 |
| 11/10/2017 9:30 AM  | 26.7 | 25.1 | 24.9 | 5.9  | 5.8  | 0.657  | 1.1 |
| 11/10/2017 9:31 AM  | 26.7 | 25.3 | 26.2 | 6    | 3.7  | -0.142 | 1.1 |
| 11/10/2017 9:32 AM  | 27   | 25.2 | 25.5 | 6.2  | 4.9  | -0.144 | 1.1 |
| 11/10/2017 9:33 AM  | 27.1 | 24.9 | 25.1 | 6    | 6.9  | -0.132 | 1.1 |
| 11/10/2017 9:34 AM  | 26.7 | 23.4 | 24.1 | 5.5  | 3.3  | -0.142 | 1.1 |
| 11/10/2017 9:35 AM  | 26.3 | 23   | 24.9 | 4.9  | 4.4  | -0.146 | 1.1 |
| 11/10/2017 9:36 AM  | 26   | 22.2 | 23.7 | 4.3  | 4.8  | -0.143 | 1.1 |
| 11/10/2017 9:37 AM  | 25.9 | 26.3 | 24.9 | 3.8  | 5.6  | -0.135 | 1.1 |
| 11/10/2017 9:38 AM  | 26.1 | 25.6 | 25.1 | 3.7  | 6.2  | -0.143 | 1.1 |
| 11/10/2017 9:39 AM  | 26.2 | 23.6 | 24   | 3.7  | 8.7  | -0.142 | 1.1 |
| 11/10/2017 9:40 AM  | 26.5 | 25.9 | 25.7 | 3.3  | 4.4  | -0.137 | 1.1 |
| 11/10/2017 9:41 AM  | 26.7 | 27.5 | 26.9 | 3.6  | 5.9  | -0.129 | 1.1 |
| 11/10/2017 9:42 AM  | 27.8 | 26.9 | 27.2 | 3.7  | 1.7  | -0.149 | 1   |
| 11/10/2017 9:43 AM  | 28.6 | 26.7 | 27.2 | 3.6  | 2.2  | -0.137 | 1   |
| 11/10/2017 9:44 AM  | 29.1 | 28.1 | 27.3 | 3.4  | 3.3  | -0.133 | 0.9 |
| 11/10/2017 9:45 AM  | 29.1 | 27.5 | 27.4 | 3.1  | 3.5  | -0.149 | 0.9 |
| 11/10/2017 9:46 AM  | 29.1 | 27.2 | 27.5 | 2.8  | 1.9  | -0.144 | 0.8 |
| 11/10/2017 9:47 AM  | 29.3 | 27.5 | 27.8 | 2.6  | 3.5  | -0.140 | 0.8 |
| 11/10/2017 9:48 AM  | 29.3 | 30.1 | 27.6 | 2.4  | 2.9  | -0.132 | 0.8 |
| 11/10/2017 9:49 AM  | 29.6 | 27.8 | 28   | 2.3  | 1.4  | -0.145 | 0.7 |
| 11/10/2017 9:50 AM  | 29.3 | 27   | 27.4 | 2.5  | 1.8  | -0.144 | 0.7 |
| 11/10/2017 9:51 AM  | 29.2 | 28.8 | 27.3 | 2.9  | 4.6  | -0.138 | 0.7 |
| 11/10/2017 9:52 AM  | 29   | 29.4 | 27.7 | 3    | 3.1  | -0.135 | 0.7 |
| 11/10/2017 9:53 AM  | 29   | 26   | 27.3 | 3.1  | 7    | -0.137 | 0.6 |
| 11/10/2017 9:54 AM  | 29   | 27.9 | 28   | 3.1  | 3.2  | -0.126 | 0.6 |
| 11/10/2017 9:55 AM  | 28.9 | 27.5 | 26.8 | 3    | 1.4  | -0.132 | 0.6 |
| 11/10/2017 9:56 AM  | 28.6 | 23.4 | 25.2 | 2.8  | 6.5  | -0.141 | 0.7 |
| 11/10/2017 9:57 AM  | 28.2 | 25.3 | 25.1 | 2.7  | 4.7  | -0.133 | 0.7 |
| 11/10/2017 9:58 AM  | 27.7 | 25   | 25.2 | 2.6  | 3.2  | -0.126 | 0.7 |
| 11/10/2017 9:59 AM  | 27.2 | 24.3 | 24   | 2.6  | 4    | -0.134 | 0.7 |
| 11/10/2017 10:00 AM | 27.2 | 24.9 | 24.4 | 2.6  | 5.2  | -0.132 | 0.7 |
| 11/10/2017 10:01 AM | 27.2 | 25   | 25.1 | 2.8  | 3.5  | -0.124 | 0.7 |
| 11/10/2017 10:02 AM | 27.4 | 24.6 | 24.8 | 3    | 3.9  | -0.129 | 0.8 |
| 11/10/2017 10:03 AM | 27.7 | 26.5 | 25.8 | 3    | 1.5  | -0.133 | 0.8 |
| 11/10/2017 10:04 AM | 28   | 25.2 | 26   | 2.9  | 3.2  | -0.127 | 0.8 |
| 11/10/2017 10:05 AM | 28.1 | 26.7 | 25.6 | 2.8  | 3.7  | -0.121 | 0.8 |
| 11/10/2017 10:06 AM | 28   | 25.2 | 25.2 | 2.7  | 4.5  | -0.138 | 0.8 |
| 11/10/2017 10:07 AM | 27.6 | 24.8 | 24.7 | 2.7  | 3.4  | -0.136 | 0.9 |
| 11/10/2017 10:08 AM | 27.5 | 26.2 | 25.7 | 2.9  | 3.7  | -0.130 | 0.9 |

|                     |      |      |      |     |      |        |     |
|---------------------|------|------|------|-----|------|--------|-----|
| 11/10/2017 10:09 AM | 27.8 | 26.5 | 26.2 | 3.1 | 2    | -0.132 | 0.8 |
| 11/10/2017 10:10 AM | 28.2 | 25.8 | 26.5 | 3.1 | 2.2  | -0.139 | 0.8 |
| 11/10/2017 10:11 AM | 28.5 | 26.3 | 26.4 | 3.1 | 5.5  | -0.131 | 0.8 |
| 11/10/2017 10:12 AM | 28.6 | 28.1 | 26.7 | 3.8 | 5.9  | -0.132 | 0.8 |
| 11/10/2017 10:13 AM | 28.6 | 24.2 | 25.3 | 5.1 | 4.3  | -0.129 | 0.8 |
| 11/10/2017 10:14 AM | 28.5 | 26.9 | 25.5 | 5.4 | 1.6  | -0.135 | 0.8 |
| 11/10/2017 10:15 AM | 28.3 | 25.5 | 24.6 | 5.3 | 2.3  | -0.131 | 0.8 |
| 11/10/2017 10:16 AM | 28   | 25.2 | 25.5 | 4.8 | 3    | -0.124 | 0.8 |
| 11/10/2017 10:17 AM | 27.6 | 24.3 | 24.6 | 4.3 | 7.1  | -0.135 | 0.8 |
| 11/10/2017 10:18 AM | 27.5 | 25.2 | 25.3 | 4.1 | 2.4  | -0.122 | 0.8 |
| 11/10/2017 10:19 AM | 27.5 | 24.2 | 24.6 | 4.2 | 5.7  | -0.123 | 0.8 |
| 11/10/2017 10:20 AM | 27.3 | 26.1 | 25.3 | 4.2 | 4.7  | -0.135 | 0.9 |
| 11/10/2017 10:21 AM | 27.1 | 24   | 24.1 | 4   | 3    | -0.132 | 0.9 |
| 11/10/2017 10:22 AM | 26.7 | 23.6 | 24.2 | 4.1 | 7.6  | -0.122 | 0.9 |
| 11/10/2017 10:23 AM | 26.7 | 24.5 | 24   | 4.5 | 12.2 | -0.131 | 0.9 |
| 11/10/2017 10:24 AM | 26.1 | 24.2 | 22.9 | 4.5 | 4.4  | -0.107 | 0.9 |
| 11/10/2017 10:25 AM | 26   | 24.8 | 23.9 | 4.3 | 2.5  | -0.112 | 0.9 |
| 11/10/2017 10:26 AM | 26.1 | 26.6 | 24.5 | 4.1 | 4.9  | -0.122 | 0.9 |
| 11/10/2017 10:27 AM | 27.1 | 28.2 | 26.5 | 3.9 | 1.9  | -0.138 | 0.9 |
| 11/10/2017 10:28 AM | 28   | 26.7 | 25.8 | 3.6 | 5.7  | -0.132 | 0.9 |
| 11/10/2017 10:29 AM | 28.2 | 25.1 | 24.9 | 3.5 | 10   | -0.124 | 0.9 |
| 11/10/2017 10:30 AM | 28.1 | 28.2 | 25.5 | 3.4 | 5.8  | -0.129 | 0.9 |
| 11/10/2017 10:31 AM | 27.9 | 27   | 25.5 | 3.2 | 3.8  | -0.131 | 0.9 |
| 11/10/2017 10:32 AM | 28.3 | 26.3 | 26.5 | 3.2 | 3.3  | -0.122 | 0.9 |
| 11/10/2017 10:33 AM | 28.8 | 26.2 | 27.1 | 3.6 | 1.7  | -0.131 | 0.8 |
| 11/10/2017 10:34 AM | 29.1 | 26.1 | 27   | 3.8 | 2.6  | -0.134 | 0.8 |
| 11/10/2017 10:35 AM | 29.1 | 27.1 | 26.8 | 3.6 | 3.7  | -0.127 | 0.8 |
| 11/10/2017 10:36 AM | 28.8 | 25.4 | 25.2 | 3.3 | 5    | -0.122 | 0.8 |
| 11/10/2017 10:37 AM | 28.2 | 26.7 | 25.2 | 3.1 | 4.4  | -0.137 | 0.8 |
| 11/10/2017 10:38 AM | 27.9 | 26.1 | 25.6 | 3   | 1.3  | -0.132 | 0.8 |
| 11/10/2017 10:39 AM | 27.5 | 24.3 | 24.6 | 3   | 4.7  | -0.129 | 0.8 |
| 11/10/2017 10:40 AM | 27.7 | 24.4 | 25.6 | 3   | 1.9  | -0.130 | 0.8 |
| 11/10/2017 10:41 AM | 27.6 | 24.3 | 25   | 3   | 6.1  | -0.141 | 0.8 |
| 11/10/2017 10:42 AM | 27.5 | 24.3 | 24.8 | 3.1 | 2.9  | -0.134 | 0.9 |
| 11/10/2017 10:43 AM | 27.6 | 28.6 | 26   | 3.4 | 3.3  | -0.126 | 0.8 |
| 11/10/2017 10:44 AM | 27.8 | 26.4 | 25.7 | 3.6 | 5.6  | -0.140 | 0.8 |
| 11/10/2017 10:45 AM | 28.1 | 27   | 26   | 3.7 | 4.5  | -0.134 | 0.8 |
| 11/10/2017 10:46 AM | 28.1 | 28   | 25.4 | 3.5 | 7.3  | -0.127 | 0.9 |
| 11/10/2017 10:47 AM | 28.1 | 26.6 | 25.9 | 3.3 | 2.7  | -0.127 | 0.9 |
| 11/10/2017 10:48 AM | 28.4 | 26.9 | 25.9 | 3.1 | 2.4  | -0.142 | 0.8 |
| 11/10/2017 10:49 AM | 28.4 | 26.1 | 25.7 | 2.9 | 2    | -0.130 | 0.8 |
| 11/10/2017 10:50 AM | 28.1 | 25.4 | 26.2 | 2.8 | 6.4  | -0.127 | 0.9 |
| 11/10/2017 10:51 AM | 27.9 | 25.8 | 26.8 | 3.2 | 5.8  | -0.136 | 0.9 |
| 11/10/2017 10:52 AM | 28   | 25.1 | 26.8 | 4.5 | 8.4  | -0.131 | 0.8 |
| 11/10/2017 10:53 AM | 28.4 | 25.6 | 27.4 | 5.4 | 2.3  | -0.133 | 1   |
| 11/10/2017 10:54 AM | 28.7 | 26.1 | 27.4 | 5.4 | 2.2  | -0.138 | 0.9 |
| 11/10/2017 10:55 AM | 28.9 | 26.6 | 26.5 | 4.9 | 3.8  | -0.144 | 1.7 |

|                     |      |      |      |     |      |        |      |
|---------------------|------|------|------|-----|------|--------|------|
| 11/10/2017 10:56 AM | 28.7 | 25.3 | 26.6 | 4.3 | 6.6  | -0.128 | 11   |
| 11/10/2017 10:57 AM | 28.2 | 23.7 | 26.7 | 3.6 | 9.5  | -0.130 | 14.2 |
| 11/10/2017 10:58 AM | 28.3 | 26.6 | 27.3 | 3.1 | 2.6  | -0.143 | 14.3 |
| 11/10/2017 10:59 AM | 27.9 | 23.6 | 24.5 | 2.7 | 11.3 | 0.006  | 14.3 |
| 11/10/2017 11:00 AM | 26.6 | 24.1 | 26   | 2.9 | 10   | -0.031 | 10.2 |
| 11/10/2017 11:01 AM | 26.8 | 27.5 | 27.5 | 4.2 | 1.8  | -0.133 | 1    |
| 11/10/2017 11:02 AM | 27.8 | 28.5 | 27.9 | 5.1 | 2.1  | -0.135 | 0.6  |
| 11/10/2017 11:03 AM | 29.8 | 27.9 | 27.8 | 5.3 | 1.9  | -0.125 | 0.6  |
| 11/10/2017 11:04 AM | 29.9 | 27.4 | 27.9 | 4.9 | 1.2  | -0.141 | 0.6  |
| 11/10/2017 11:05 AM | 29.7 | 27.3 | 27.8 | 4.3 | 1.8  | -0.131 | 0.6  |
| 11/10/2017 11:06 AM | 29.8 | 27.9 | 28.2 | 3.7 | 1.4  | -0.129 | 0.6  |
| 11/10/2017 11:07 AM | 30.1 | 29.2 | 28.4 | 3.4 | 0.5  | -0.134 | 0.6  |
| 11/10/2017 11:08 AM | 30.4 | 27.4 | 27.8 | 3.1 | 2.4  | -0.127 | 0.6  |
| 11/10/2017 11:09 AM | 30   | 30.5 | 36.2 | 2.9 | 7.7  | 0.787  | 1.2  |
| 11/10/2017 11:10 AM | 29.4 | 28.9 | 26.9 | 2.7 | 4.4  | 0.577  | 0.9  |
| 11/10/2017 11:11 AM | 28.9 | 27.2 | 27.1 | 2.8 | 4.8  | 0.523  | 0.7  |
| 11/10/2017 11:12 AM | 29.3 | 28.3 | 27.4 | 2.9 | 5    | 0.617  | 0.7  |
| 11/10/2017 11:13 AM | 29.4 | 27.4 | 27.6 | 3.1 | 5.8  | 0.720  | 0.7  |
| 11/10/2017 11:14 AM | 29.2 | 26.6 | 30.1 | 3.3 | 10.9 | 1.018  | 1.1  |
| 11/10/2017 11:15 AM | 29   | 26.8 | 26.5 | 3.6 | 6.6  | 0.313  | 1.1  |
| 11/10/2017 11:16 AM | 29.3 | 29.4 | 27.8 | 4   | 3.3  | 0.488  | 0.9  |
| 11/10/2017 11:17 AM | 29.6 | 28.3 | 27   | 4.6 | 7.1  | 1.247  | 0.8  |
| 11/10/2017 11:18 AM | 29.1 | 26.1 | 26   | 5.2 | 18.1 | -0.045 | 0.8  |
| 11/10/2017 11:19 AM | 28.1 | 28.4 | 27.1 | 5.9 | 10.4 | -0.043 | 0.8  |
| 11/10/2017 11:20 AM | 27.8 | 26.5 | 26.6 | 6.6 | 10   | 0.012  | 0.8  |
| 11/10/2017 11:21 AM | 28.3 | 28.6 | 28.1 | 7.1 | 3.6  | -0.115 | 0.8  |
| 11/10/2017 11:22 AM | 29.2 | 26.7 | 28.2 | 7.7 | 3.3  | 0.866  | 0.8  |
| 11/10/2017 11:23 AM | 29.1 | 25   | 29.5 | 7.9 | 6    | 2.939  | 0.8  |
| 11/10/2017 11:24 AM | 29.1 | 27.9 | 28.2 | 8   | 3.8  | 0.284  | 0.7  |
| 11/10/2017 11:25 AM | 29.1 | 28.5 | 27.7 | 7.9 | 1.1  | -0.032 | 0.7  |
| 11/10/2017 11:26 AM | 29.6 | 26.3 | 27.1 | 7.6 | 2.7  | 0.150  | 0.7  |
| 11/10/2017 11:27 AM | 28.2 | 23.1 | 25   | 7   | 22.5 | 5.054  | 0.9  |
| 11/10/2017 11:28 AM | 27.5 | 28.6 | 27.2 | 6.6 | 2.1  | 0.489  | 0.8  |
| 11/10/2017 11:29 AM | 27.6 | 27.5 | 27.7 | 6.7 | 1.2  | -0.012 | 0.6  |
| 11/10/2017 11:30 AM | 29.6 | 28   | 27.8 | 6.6 | 1.1  | 0.157  | 0.6  |
| 11/10/2017 11:31 AM | 30.6 | 29.7 | 28.2 | 6.4 | 1    | 0.297  | 0.7  |
| 11/10/2017 11:32 AM | 30.7 | 27.7 | 27.7 | 6   | 0.9  | 0.018  | 0.7  |
| 11/10/2017 11:33 AM | 30.3 | 28.2 | 27.4 | 5.7 | 3.8  | 1.151  | 0.7  |
| 11/10/2017 11:34 AM | 30.1 | 26.3 | 27.1 | 5.3 | 1.3  | 0.083  | 1.2  |
| 11/10/2017 11:35 AM | 29.9 | 27.7 | 27.8 | 5.1 | 0.6  | 0.031  | 1.2  |
| 11/10/2017 11:36 AM | 30.2 | 28.1 | 27.7 | 4.9 | 0.8  | 0.028  | 1.1  |
| 11/10/2017 11:37 AM | 30.2 | 28.2 | 27.4 | 4.8 | 4.4  | 1.842  | 1.1  |
| 11/10/2017 11:38 AM | 30.1 | 29   | 27.9 | 4.8 | 2.4  | 0.669  | 1.2  |
| 11/10/2017 11:39 AM | 29.9 | 26.2 | 27.9 | 4.9 | 4.2  | 1.571  | 1.2  |
| 11/10/2017 11:40 AM | 30.3 | 29.1 | 27.9 | 4.9 | 0.8  | 0.036  | 0.8  |
| 11/10/2017 11:41 AM | 30.5 | 28.3 | 27.7 | 4.9 | 0.7  | 0.019  | 0.7  |
| 11/10/2017 11:42 AM | 30.8 | 28.3 | 28.2 | 4.5 | 0.9  | 0.022  | 0.7  |



|                     |      |      |      |     |      |        |     |
|---------------------|------|------|------|-----|------|--------|-----|
| 11/10/2017 11:43 AM | 30.9 | 28.9 | 27.9 | 4.2 | 0.3  | -0.106 | 0.7 |
| 11/10/2017 11:44 AM | 30.8 | 28.4 | 27.6 | 4.1 | 0.3  | -0.106 | 0.7 |
| 11/10/2017 11:45 AM | 30.6 | 28.3 | 27.8 | 4   | 0.7  | 0.044  | 0.9 |
| 11/10/2017 11:46 AM | 30.4 | 27.1 | 27.7 | 3.9 | 0.6  | -0.115 | 1.4 |
| 11/10/2017 11:47 AM | 30.4 | 27.4 | 28.5 | 3.8 | 0.1  | -0.105 | 1.1 |
| 11/10/2017 11:48 AM | 30.6 | 27.9 | 27.7 | 3.7 | 0.2  | -0.129 | 1   |
| 11/10/2017 11:49 AM | 30.8 | 28.1 | 27.8 | 3.6 | 0.3  | -0.113 | 0.7 |
| 11/10/2017 11:50 AM | 31   | 30   | 27.6 | 3.5 | 0.2  | -0.127 | 3.3 |
| 11/10/2017 11:51 AM | 31   | 28.3 | 28.1 | 3.4 | 0.2  | -0.130 | 6.5 |
| 11/10/2017 11:52 AM | 31.1 | 29.2 | 25.5 | 3.3 | 0.1  | -0.121 | 9   |
| 11/10/2017 11:53 AM | 30.7 | 27.8 | 24.3 | 3.2 | 0.1  | 0.053  | 7.3 |
| 11/10/2017 11:54 AM | 30.6 | 27.7 | 26.6 | 3.1 | -0.1 | -0.091 | 8.3 |
| 11/10/2017 11:55 AM | 30.4 | 25.4 | 24.2 | 2.9 | 0.3  | -0.052 | 8.4 |
| 11/10/2017 11:56 AM | 29.1 | 25.2 | 25.1 | 2.9 | 0.2  | -0.033 | 6.3 |
| 11/10/2017 11:57 AM | 29   | 27.7 | 27.6 | 2.8 | 0.4  | -0.132 | 3.1 |
| 11/10/2017 11:58 AM | 29.3 | 28.7 | 27.8 | 2.6 | 0.3  | -0.136 | 5.6 |
| 11/10/2017 11:59 AM | 30.8 | 28   | 28.7 | 2.5 | 0.4  | -0.126 | 4   |
| 11/10/2017 12:00 PM | 30.8 | 28.1 | 27.8 | 2.4 | 0.4  | -0.136 | 3   |
| 11/10/2017 12:01 PM | 30.5 | 28.1 | 28   | 2.3 | 0.4  | -0.134 | 2.2 |
| 11/10/2017 12:02 PM | 30.4 | 28.4 | 27.9 | 2.2 | 0.2  | -0.141 | 0.9 |
| 11/10/2017 12:03 PM | 30.5 | 27.7 | 27.8 | 2.1 | 0.3  | -0.142 | 0.7 |
| 11/10/2017 12:04 PM | 30.4 | 27.8 | 27.4 | 2   | 0.1  | -0.136 | 0.7 |
| 11/10/2017 12:05 PM | 30.3 | 27.8 | 27.6 | 2   | 0.3  | -0.130 | 0.7 |
| 11/10/2017 12:06 PM | 30.3 | 27.6 | 27.3 | 2   | 0.4  | -0.129 | 0.8 |
| 11/10/2017 12:07 PM | 30.3 | 27.2 | 27.7 | 1.9 | 0.2  | -0.152 | 0.8 |
| 11/10/2017 12:08 PM | 30.3 | 28.8 | 24.4 | 1.9 | 0.5  | -0.137 | 0.7 |
| 11/10/2017 12:09 PM | 30   | 29.6 | 22.1 | 1.9 | 0.4  | -0.129 | 0.6 |
| 11/10/2017 12:10 PM | 29.9 | 27.3 | 25.9 | 2   | 0.3  | -0.137 | 0.7 |
| 11/10/2017 12:11 PM | 29.7 | 26.8 | 27.2 | 2   | 0.3  | -0.148 | 0.8 |
| 11/10/2017 12:12 PM | 29.8 | 26.5 | 26.9 | 2.1 | 0.5  | -0.143 | 0.8 |
| 11/10/2017 12:13 PM | 30   | 26.4 | 27.8 | 2.1 | 0.3  | -0.137 | 0.7 |
| 11/10/2017 12:14 PM | 30.2 | 29.3 | 27.7 | 2.1 | 0.4  | -0.155 | 0.8 |
| 11/10/2017 12:15 PM | 30.3 | 28.7 | 27.5 | 2.1 | 0.2  | -0.148 | 0.7 |
| 11/10/2017 12:16 PM | 30.4 | 27.9 | 27.5 | 2.1 | 0.2  | -0.150 | 0.6 |
| 11/10/2017 12:17 PM | 30.3 | 26.6 | 27.7 | 2   | 0.3  | -0.134 | 0.8 |
| 11/10/2017 12:18 PM | 30.2 | 28.3 | 27.5 | 2   | 0.2  | -0.145 | 0.7 |
| 11/10/2017 12:19 PM | 30.2 | 28.3 | 27.8 | 1.9 | 0.4  | -0.151 | 0.7 |
| 11/10/2017 12:20 PM | 30.2 | 27.7 | 27.8 | 1.9 | 0.4  | -0.144 | 0.6 |
| 11/10/2017 12:21 PM | 30.4 | 27.1 | 28.1 | 1.9 | 0.2  | -0.145 | 0.7 |
| 11/10/2017 12:22 PM | 30.4 | 28.8 | 27.3 | 1.9 | 0.3  | -0.155 | 0.7 |
| 11/10/2017 12:23 PM | 30.4 | 29.3 | 26.8 | 1.9 | 0.4  | -0.150 | 0.8 |
| 11/10/2017 12:24 PM | 30.1 | 27.8 | 27.2 | 1.9 | 0.7  | -0.150 | 0.7 |
| 11/10/2017 12:25 PM | 30   | 29.2 | 27.8 | 2   | 0.6  | -0.149 | 0.7 |
| 11/10/2017 12:26 PM | 30.2 | 28.7 | 27.8 | 2   | 0.3  | -0.158 | 0.7 |
| 11/10/2017 12:27 PM | 30.5 | 26.1 | 27.5 | 2   | 0.6  | -0.160 | 0.7 |
| 11/10/2017 12:28 PM | 30.7 | 26.6 | 28.1 | 2.1 | 0.4  | -0.154 | 0.7 |
| 11/10/2017 12:29 PM | 30.6 | 27.2 | 27.8 | 2.1 | 0.6  | -0.154 | 0.7 |

|                     |      |      |      |     |     |        |     |
|---------------------|------|------|------|-----|-----|--------|-----|
| 11/10/2017 12:30 PM | 30.6 | 28.6 | 27.8 | 2.1 | 0.2 | -0.163 | 0.7 |
| 11/10/2017 12:31 PM | 30.5 | 29.2 | 27.8 | 2.1 | 0.5 | -0.155 | 0.7 |
| 11/10/2017 12:32 PM | 30.5 | 28.5 | 27.6 | 2.1 | 0.6 | -0.157 | 0.7 |
| 11/10/2017 12:33 PM | 30.6 | 27.9 | 27.4 | 2.1 | 0.5 | -0.155 | 0.7 |
| 11/10/2017 12:34 PM | 30.6 | 29.7 | 27.8 | 2.1 | 0.3 | -0.159 | 0.8 |
| 11/10/2017 12:35 PM | 30.6 | 27.7 | 27.5 | 2.1 | 0.5 | -0.165 | 0.7 |
| 11/10/2017 12:36 PM | 30.4 | 28.8 | 27.1 | 2.1 | 0.9 | -0.148 | 0.8 |
| 11/10/2017 12:37 PM | 30.4 | 27.2 | 27.8 | 2.2 | 0.7 | -0.156 | 0.8 |
| 11/10/2017 12:38 PM | 30.3 | 28.1 | 27.6 | 2.2 | 0.6 | -0.163 | 0.8 |
| 11/10/2017 12:39 PM | 30.6 | 29.6 | 27.5 | 2.2 | 0.6 | -0.156 | 0.8 |
| 11/10/2017 12:40 PM | 30.6 | 27.8 | 27.8 | 2.2 | 0.4 | -0.148 | 0.8 |
| 11/10/2017 12:41 PM | 30.7 | 29.1 | 28   | 2.3 | 0.4 | -0.162 | 0.8 |
| 11/10/2017 12:42 PM | 30.8 | 28.1 | 27.8 | 2.3 | 0.5 | -0.163 | 0.8 |
| 11/10/2017 12:43 PM | 30.8 | 29.4 | 27.9 | 2.2 | 0.3 | -0.154 | 0.8 |
| 11/10/2017 12:44 PM | 30.8 | 29.1 | 28.2 | 2   | 0.6 | -0.158 | 0.8 |
| 11/10/2017 12:45 PM | 30.8 | 30.4 | 28.4 | 2   | 0.4 | -0.172 | 0.8 |
| 11/10/2017 12:46 PM | 30.8 | 29.1 | 28.3 | 1.9 | 0.6 | -0.167 | 0.7 |
| 11/10/2017 12:47 PM | 30.8 | 28.7 | 28.9 | 1.8 | 0.5 | -0.150 | 0.7 |
| 11/10/2017 12:48 PM | 30.9 | 28.8 | 28.5 | 1.7 | 0.4 | -0.167 | 0.7 |
| 11/10/2017 12:49 PM | 30.9 | 29.8 | 28.4 | 1.6 | 0.4 | -0.169 | 0.6 |
| 11/10/2017 12:50 PM | 30.9 | 28.6 | 28.2 | 1.5 | 0.3 | -0.163 | 0.7 |
| 11/10/2017 12:51 PM | 30.7 | 29.1 | 28.2 | 1.4 | 0.7 | -0.156 | 0.6 |
| 11/10/2017 12:52 PM | 30.7 | 29.5 | 28.1 | 1.3 | 0.6 | -0.169 | 0.7 |
| 11/10/2017 12:53 PM | 30.6 | 29.2 | 28.1 | 1.3 | 0.5 | -0.169 | 0.7 |
| 11/10/2017 12:54 PM | 30.7 | 28.3 | 28.3 | 1.2 | 0.3 | -0.160 | 0.7 |
| 11/10/2017 12:55 PM | 30.6 | 28.6 | 27.8 | 1.3 | 0.5 | -0.154 | 0.7 |
| 11/10/2017 12:56 PM | 30.6 | 28.4 | 28.3 | 1.3 | 0.7 | -0.166 | 0.7 |
| 11/10/2017 12:57 PM | 30.7 | 29.7 | 27.8 | 1.6 | 0.5 | -0.165 | 0.7 |
| 11/10/2017 12:58 PM | 30.7 | 28.6 | 27.5 | 1.9 | 0.3 | -0.153 | 0.7 |
| 11/10/2017 12:59 PM | 30.7 | 29.8 | 27.8 | 2.3 | 0.5 | -0.158 | 0.7 |
| 11/10/2017 1:00 PM  | 30.5 | 27.4 | 27.4 | 2.6 | 0.6 | -0.166 | 0.7 |
| 11/10/2017 1:01 PM  | 30.2 | 27.2 | 27.2 | 2.8 | 1   | -0.160 | 0.7 |
| 11/10/2017 1:02 PM  | 30   | 27.7 | 27.2 | 3   | 0.7 | -0.153 | 0.7 |
| 11/10/2017 1:03 PM  | 29.8 | 28.8 | 27.4 | 3.1 | 0.6 | -0.154 | 0.7 |
| 11/10/2017 1:04 PM  | 30   | 26.8 | 27.2 | 3.1 | 0.4 | -0.160 | 0.7 |
| 11/10/2017 1:05 PM  | 30   | 27.8 | 27.4 | 3.1 | 0.4 | -0.159 | 0.7 |
| 11/10/2017 1:06 PM  | 30   | 29   | 27.8 | 3   | 0.5 | -0.152 | 0.7 |
| 11/10/2017 1:07 PM  | 30.2 | 29.8 | 28   | 2.9 | 0.3 | -0.150 | 0.8 |
| 11/10/2017 1:08 PM  | 30.6 | 29   | 28.1 | 2.8 | 0.7 | -0.156 | 0.8 |
| 11/10/2017 1:09 PM  | 30.5 | 25.8 | 27.3 | 2.7 | 0.6 | -0.159 | 0.8 |
| 11/10/2017 1:10 PM  | 30.1 | 29.4 | 27.2 | 2.7 | 0.8 | -0.151 | 0.8 |
| 11/10/2017 1:11 PM  | 29.9 | 30   | 28.4 | 2.6 | 0.6 | -0.155 | 0.8 |
| 11/10/2017 1:12 PM  | 30.1 | 28.4 | 28.2 | 2.5 | 0.5 | -0.164 | 0.8 |
| 11/10/2017 1:13 PM  | 30.5 | 29.6 | 28.6 | 2.5 | 0.4 | -0.151 | 0.8 |
| 11/10/2017 1:14 PM  | 30.7 | 28   | 27.4 | 2.4 | 0.8 | -0.151 | 0.8 |
| 11/10/2017 1:15 PM  | 30.4 | 26.7 | 27.6 | 2.4 | 0.8 | -0.155 | 0.8 |
| 11/10/2017 1:16 PM  | 30.2 | 30.1 | 27.3 | 2.3 | 0.7 | -0.160 | 0.8 |

|                    |      |       |        |       |        |        |     |
|--------------------|------|-------|--------|-------|--------|--------|-----|
| 11/10/2017 1:17 PM | 30   | 29.3  | 27.6   | 2.3   | 0.7    | -0.151 | 0.8 |
| 11/10/2017 1:18 PM | 29.9 | 28.6  | 27.4   | 2.3   | 0.6    | -0.150 | 0.8 |
| 11/10/2017 1:19 PM | 30   | 29.8  | 27.5   | 2.3   | 0.6    | -0.158 | 0.8 |
| 11/10/2017 1:20 PM | 30   | 27.9  | 27.7   | 2.3   | 0.5    | -0.164 | 0.8 |
| 11/10/2017 1:21 PM | 30.2 | 27.8  | 28     | 2.3   | 0.6    | -0.156 | 0.8 |
| 11/10/2017 1:22 PM | 30.3 | 28.1  | 27.9   | 2.3   | 0.4    | -0.157 | 0.8 |
| 11/10/2017 1:23 PM | 30.4 | 28.6  | 28.1   | 2.4   | 0.2    | -0.166 | 0.8 |
| 11/10/2017 1:24 PM | 30.7 | 28.1  | 28.1   | 2.4   | 0.3    | -0.166 | 0.8 |
| 11/10/2017 1:25 PM | 30.7 | 28    | 28.1   | 2.4   | 0.7    | -0.152 | 0.8 |
| 11/10/2017 1:26 PM | 30.7 | 29.1  | 27.9   | 2.3   | 0.5    | -0.160 | 0.8 |
| 11/10/2017 1:27 PM | 30.6 | 28.2  | 28.5   | 2.3   | 0.4    | -0.162 | 0.8 |
| 11/10/2017 1:28 PM | 30.7 | 28.7  | 28.1   | 2.3   | 0.3    | -0.167 | 0.8 |
| 11/10/2017 1:29 PM | 30.8 | 28.4  | 27.8   | 2.2   | 0.5    | -0.157 | 0.8 |
| 11/10/2017 1:30 PM | 30.8 | 30.3  | 28.3   | 2.2   | 0.5    | -0.165 | 0.8 |
| 11/10/2017 1:31 PM | 30.9 | 29.5  | 28.2   | 2.1   | 0.7    | -0.164 | 0.8 |
| 11/10/2017 1:32 PM | 31   | 29.5  | 28.2   | 2.1   | 0.3    | -0.168 | 0.8 |
| 11/10/2017 1:33 PM | 31   | 30.6  | 28     | 2.1   | 0.5    | -0.153 | 0.8 |
| 11/10/2017 1:34 PM | 30.9 | 28.2  | 27.8   | 2.1   | 0.4    | -0.169 | 0.8 |
| 11/10/2017 1:35 PM | 30.8 | 30.6  | 28.2   | 2.1   | 0.7    | -0.164 | 0.8 |
| 11/10/2017 1:36 PM | 30.9 | 28.9  | 28.5   | 2.1   | 0.7    | -0.156 | 0.8 |
| 11/10/2017 1:37 PM | 30.9 | 29.2  | 28.6   | 2.1   | 0.5    | -0.150 | 0.8 |
| 11/10/2017 1:38 PM | 31   | 29.1  | 28.5   | 2     | 0.6    | -0.138 | 0.8 |
| 11/10/2017 1:39 PM | 31   | 28.2  | 28.2   | 2     | 0.9    | -0.120 | 0.8 |
| 11/10/2017 1:40 PM | 30.7 | 29.3  | 27.9   | 2     | 3.1    | 2.263  | 0.9 |
| 11/10/2017 1:41 PM | 29.8 | 26.1  | 27.3   | 2.1   | 8.2    | 3.750  | 1   |
| 11/10/2017 1:42 PM | 28.6 | 24.8  | 25.8   | 2.2   | 22.8   | 1.689  | 0.9 |
| 11/10/2017 1:43 PM | 26.7 | 25.2  | 25.2   | 2.2   | 32.6   | 1.328  | 0.9 |
| 11/10/2017 1:44 PM | 24.9 | 23.7  | 24.8   | 2.8   | 40.4   | 2.290  | 1   |
| 11/10/2017 1:45 PM | 24   | 25.6  | 25.9   | 4.5   | 25.9   | 1.420  | 0.9 |
| 11/10/2017 1:46 PM | 25   | 28.4  | 27.3   | 5.9   | 13     | 1.888  | 0.9 |
| 11/10/2017 1:47 PM | 27   | 28    | 27.9   | 7.2   | 5.4    | 2.306  | 1   |
| 11/10/2017 1:48 PM | 28.6 | 26.8  | 27.6   | 8     | 6.3    | 1.650  | 0.9 |
| 11/10/2017 1:49 PM | 29.3 | 29.8  | 28.2   | 8.3   | 5.8    | 3.000  | 0.9 |
| 11/10/2017 1:50 PM | 27.8 | 26.2  | 179.9  | 8.4   | 131.2  | 6.448  | 1.3 |
| 11/10/2017 1:51 PM | 19.6 | 32    | 354.7  | 9.2   | 613.7  | 12.675 | 2.3 |
| 11/10/2017 1:52 PM | 10.6 | 24.7  | 274.2  | 21.9  | 696.6  | 13.044 | 2.5 |
| 11/10/2017 1:53 PM | 4.1  | 19.6  | 201.8  | 44.6  | 462.2  | 8.786  | 1.8 |
| 11/10/2017 1:54 PM | 4.6  | 22.5  | 195.5  | 63.3  | 375.5  | 7.749  | 1.6 |
| 11/10/2017 1:55 PM | 4.7  | 101.3 | 1334   | 84.4  | 1086.6 | 49.528 | 7.4 |
| 11/10/2017 1:56 PM | 4.5  | 15.7  | 158.5  | 136.2 | 270.5  | 7.370  | 2.8 |
| 11/10/2017 1:57 PM | 4.5  | 15    | 105.6  | 172.3 | 183.7  | 3.188  | 1.2 |
| 11/10/2017 1:58 PM | 6.6  | 15.9  | 91.6   | 179.4 | 155.8  | 3.577  | 1.2 |
| 11/10/2017 1:59 PM | 8.2  | 15.1  | 101.1  | 171.7 | 183.1  | 3.269  | 1.2 |
| 11/10/2017 2:00 PM | 10.1 | 17.1  | 63.8   | 155.2 | 93.6   | 1.729  | 1.1 |
| 11/10/2017 2:01 PM | 12.4 | 21.3  | 27     | 135.2 | 39.6   | 0.692  | 0.9 |
| 11/10/2017 2:02 PM | 13.6 | 50.3  | 470.2  | 120   | 989.7  | 15.497 | 2.6 |
| 11/10/2017 2:03 PM | 10   | 106.6 | 1527.5 | 105.7 | 828    | 44.838 | 8.3 |

|                    |      |       |        |       |       |        |      |
|--------------------|------|-------|--------|-------|-------|--------|------|
| 11/10/2017 2:04 PM | 5.7  | 16.2  | 166    | 105   | 322.8 | 8.698  | 4.2  |
| 11/10/2017 2:05 PM | 3.2  | 13.9  | 125.2  | 105.1 | 180.1 | 3.892  | 1.5  |
| 11/10/2017 2:06 PM | 4.5  | 17.8  | 225.1  | 105.3 | 356.9 | 7.089  | 1.8  |
| 11/10/2017 2:07 PM | 4.7  | 16    | 211.4  | 103.9 | 472   | 7.767  | 1.9  |
| 11/10/2017 2:08 PM | 3.7  | 26.9  | 289.4  | 105.5 | 554.5 | 8.873  | 2    |
| 11/10/2017 2:09 PM | 2.5  | 45.2  | 533.9  | 110.9 | 851.6 | 18.154 | 3.6  |
| 11/10/2017 2:10 PM | 1.6  | 50.7  | 551.7  | 122.9 | 917.3 | 18.354 | 4.2  |
| 11/10/2017 2:11 PM | 1.3  | 52    | 635    | 132.7 | 599.8 | 23.837 | 5.2  |
| 11/10/2017 2:12 PM | 2.8  | 20    | 174    | 153.5 | 61.8  | 9.625  | 3.2  |
| 11/10/2017 2:13 PM | 5    | 26.3  | 200.3  | 166.1 | 74    | 15.500 | 3.1  |
| 11/10/2017 2:14 PM | 6.2  | 76.6  | 755.2  | 166.8 | 462.6 | 35.899 | 5.5  |
| 11/10/2017 2:15 PM | 4.7  | 31.9  | 387    | 161.4 | 721.6 | 19.945 | 5.1  |
| 11/10/2017 2:16 PM | 2.7  | 18.8  | 237.2  | 164.3 | 362.8 | 9.727  | 2.7  |
| 11/10/2017 2:17 PM | 1.5  | 25.2  | 279.1  | 160.4 | 535.8 | 12.360 | 2.9  |
| 11/10/2017 2:18 PM | 2.1  | 25.6  | 315.3  | 156.5 | 423.3 | 10.503 | 2.5  |
| 11/10/2017 2:19 PM | 2.7  | 33.6  | 360.8  | 151.6 | 367.6 | 12.680 | 2.9  |
| 11/10/2017 2:20 PM | 2.7  | 27.5  | 321.5  | 136.4 | 501.6 | 12.212 | 3    |
| 11/10/2017 2:21 PM | 2.6  | 18.8  | 117.9  | 130.9 | 348.4 | 9.604  | 2.5  |
| 11/10/2017 2:22 PM | 2.5  | 21.6  | 276.7  | 131.2 | 371.2 | 7.918  | 2    |
| 11/10/2017 2:23 PM | 2.6  | 15.8  | 249.9  | 130.3 | 391.1 | 7.677  | 2    |
| 11/10/2017 2:24 PM | 2.6  | 17.5  | 148.5  | 126.2 | 402.1 | 8.076  | 2    |
| 11/10/2017 2:25 PM | 2.9  | 14.5  | 100.6  | 123.2 | 180.5 | 4.555  | 1.8  |
| 11/10/2017 2:26 PM | 3.8  | 35.9  | 644.7  | 121.4 | 307.3 | 15.705 | 3    |
| 11/10/2017 2:27 PM | 3.8  | 18.5  | 235.2  | 119   | 450.7 | 8.775  | 2.1  |
| 11/10/2017 2:28 PM | 3.1  | 18.8  | 227.2  | 119.3 | 428.2 | 9.608  | 2    |
| 11/10/2017 2:29 PM | 3    | 16.7  | 82.7   | 117.4 | 81.4  | 7.456  | 2.3  |
| 11/10/2017 2:30 PM | 4.4  | 225.1 | 3160.4 | 109.6 | 196.7 | 73.616 | 10.7 |
| 11/10/2017 2:31 PM | 4.1  | 67.7  | 798.7  | 102.7 | 365.1 | 58.299 | 14.5 |
| 11/10/2017 2:32 PM | 3.2  | 14.8  | 167    | 94.4  | 189.6 | 7.059  | 3.1  |
| 11/10/2017 2:33 PM | 1.9  | 10.3  | 86.7   | 88    | 116.8 | 3.428  | 1.8  |
| 11/10/2017 2:34 PM | 3.6  | 7.3   | 17.3   | 80.3  | 17.1  | 0.285  | 1.2  |
| 11/10/2017 2:35 PM | 5.6  | 8.8   | 25.7   | 71.7  | 12.8  | 0.347  | 1.1  |
| 11/10/2017 2:36 PM | 7.3  | 9.7   | 28.1   | 62.5  | 6.9   | 0.390  | 1.2  |
| 11/10/2017 2:37 PM | 8.2  | 11.9  | 21.8   | 53.9  | 5.3   | 0.351  | 1.1  |
| 11/10/2017 2:38 PM | 8.7  | 10.9  | 21.2   | 45.4  | 3.9   | 0.232  | 1.1  |
| 11/10/2017 2:39 PM | 9.2  | 10.4  | 19.5   | 39.9  | 5.5   | 0.618  | 1.1  |
| 11/10/2017 2:40 PM | 9.7  | 11.3  | 20.5   | 32.9  | 3.3   | 0.225  | 1    |
| 11/10/2017 2:41 PM | 10.1 | 13.4  | 18.7   | 27    | 2.7   | 0.072  | 1    |
| 11/10/2017 2:42 PM | 10.8 | 13.3  | 14.7   | 22.1  | 2.4   | -0.054 | 1    |
| 11/10/2017 2:43 PM | 11.7 | 13.2  | 14.2   | 19    | 1.7   | -0.114 | 0.9  |
| 11/10/2017 2:44 PM | 12.5 | 13.8  | 19.3   | 18.9  | 2.4   | 0.235  | 1.2  |
| 11/10/2017 2:45 PM | 13.1 | 13.6  | 21.2   | 12.2  | 9.4   | 0.518  | 1.3  |
| 11/10/2017 2:46 PM | 13.1 | 14.2  | 18.3   | 7.2   | 12.5  | 4.951  | 1.2  |
| 11/10/2017 2:47 PM | 13.4 | 13.6  | 17.7   | 6.1   | 2.5   | 0.753  | 1.7  |
| 11/10/2017 2:48 PM | 13.9 | 16.1  | 14.8   | 5     | 1.4   | 0.045  | 2.5  |
| 11/10/2017 2:49 PM | 14.1 | 12.9  | 20.8   | 4.1   | 3     | 0.810  | 2.8  |
| 11/10/2017 2:50 PM | 14.3 | 15.7  | 15.6   | 3.5   | 1.5   | -0.144 | 1.9  |

|                    |      |      |       |       |       |        |     |
|--------------------|------|------|-------|-------|-------|--------|-----|
| 11/10/2017 2:51 PM | 14.9 | 15.8 | 15.2  | 2.9   | 1.3   | -0.171 | 1.8 |
| 11/10/2017 2:52 PM | 16.3 | 17.9 | 16.9  | 2.3   | 1.3   | -0.181 | 1.9 |
| 11/10/2017 2:53 PM | 17.3 | 19   | 18.2  | 1.8   | 1.2   | -0.194 | 1.3 |
| 11/10/2017 2:54 PM | 18   | 18.7 | 18.2  | 1.4   | 1     | -0.200 | 1.1 |
| 11/10/2017 2:55 PM | 18.6 | 20   | 18.4  | 1     | 1.1   | -0.188 | 0.9 |
| 11/10/2017 2:56 PM | 18.9 | 19.2 | 18.9  | 0.6   | 1.4   | -0.187 | 0.9 |
| 11/10/2017 2:57 PM | 19.2 | 19.8 | 19.4  | 0.3   | 1.1   | -0.195 | 0.9 |
| 11/10/2017 2:58 PM | 19.4 | 21.9 | 19.6  | 0     | 1.3   | -0.185 | 0.9 |
| 11/10/2017 2:59 PM | 19.7 | 21.7 | 20    | -0.2  | 1.5   | -0.186 | 0.9 |
| 11/10/2017 3:00 PM | 19.8 | 20   | 20    | -0.4  | 1.1   | -0.195 | 0.9 |
| 11/10/2017 3:01 PM | 20.1 | 20.5 | 20.4  | -0.6  | 0.9   | -0.199 | 0.9 |
| 11/10/2017 3:02 PM | 20.4 | 20.8 | 20.8  | -0.7  | 1.2   | -0.189 | 0.9 |
| 11/10/2017 3:03 PM | 20.7 | 21.8 | 20.9  | -0.8  | 1.2   | -0.114 | 0.9 |
| 11/10/2017 3:04 PM | 21.1 | 20.6 | 21    | -0.9  | 1     | -0.181 | 0.9 |
| 11/10/2017 3:05 PM | 21.3 | 22.4 | 21.1  | -1    | 0.9   | -0.195 | 0.9 |
| 11/10/2017 3:06 PM | 21.4 | 20.8 | 21.2  | -1.1  | 1.3   | -0.195 | 0.9 |
| 11/10/2017 3:07 PM | 21.6 | 20.8 | 21.7  | -1.1  | 1.1   | -0.202 | 0.9 |
| 11/10/2017 3:08 PM | 21.8 | 22.3 | 22    | -1.2  | 1     | -0.202 | 0.9 |
| 11/10/2017 3:09 PM | 22   | 20.9 | 22    | -1.3  | 1.1   | -0.198 | 0.9 |
| 11/10/2017 3:10 PM | 22.2 | 22.7 | 22    | -1.3  | 1.1   | -0.192 | 0.9 |
| 11/10/2017 3:11 PM | 22.3 | 22.5 | 22    | -1.4  | 1     | -0.202 | 1   |
| 11/10/2017 3:12 PM | 22.4 | 20.9 | 21.7  | -1.4  | 1.2   | -0.162 | 1   |
| 11/10/2017 3:13 PM | 22.5 | 21.9 | 22.2  | -1.4  | 1.4   | -0.168 | 0.9 |
| 11/10/2017 3:14 PM | 22.6 | 22.2 | 22.3  | -1.4  | 1     | -0.199 | 1   |
| 11/10/2017 3:15 PM | 22.8 | 23.8 | 22.6  | -1.4  | 1     | -0.204 | 1   |
| 11/10/2017 3:16 PM | 23.1 | 23.1 | 22.3  | -1.4  | 1.2   | -0.203 | 1   |
| 11/10/2017 3:17 PM | 23.4 | 23.6 | 22.5  | -1.4  | 1     | -0.197 | 1   |
| 11/10/2017 3:18 PM | 23.4 | 22.7 | 22.2  | -1.4  | 1.2   | -0.207 | 1   |
| 11/10/2017 3:19 PM | 23.5 | 24.3 | 22.7  | -1.4  | 1.2   | -0.182 | 1   |
| 11/10/2017 3:20 PM | 23.5 | 23.6 | 22.8  | -1.4  | 1.3   | -0.198 | 1   |
| 11/10/2017 3:21 PM | 23.6 | 23.8 | 22.8  | -1.4  | 1.3   | -0.201 | 1   |
| 11/10/2017 3:22 PM | 23.6 | 23.5 | 22.3  | -1.4  | 3.8   | -0.124 | 1   |
| 11/10/2017 3:23 PM | 23.4 | 24.3 | 22.9  | -1.4  | 4.1   | -0.005 | 1   |
| 11/10/2017 3:24 PM | 23.6 | 23.3 | 23.3  | -1.4  | 1.1   | -0.185 | 1   |
| 11/10/2017 3:25 PM | 23.8 | 24.9 | 23.5  | -1.3  | 1.6   | -0.036 | 0.9 |
| 11/10/2017 3:26 PM | 24.3 | 23.2 | 23.3  | -1.2  | 1.2   | -0.210 | 1   |
| 11/10/2017 3:27 PM | 24.3 | 22.2 | 23.2  | -1.1  | 1.3   | -0.199 | 1   |
| 11/10/2017 3:28 PM | 22.4 | 20.9 | 131   | -1.1  | 87.3  | 1.707  | 1.3 |
| 11/10/2017 3:29 PM | 16.2 | 26.7 | 285.8 | 0     | 269.8 | 6.496  | 2.1 |
| 11/10/2017 3:30 PM | 9    | 25.5 | 292.9 | 10.6  | 361.3 | 9.157  | 2.6 |
| 11/10/2017 3:31 PM | 3.9  | 16.6 | 113.4 | 25.6  | 296.4 | 5.361  | 2.2 |
| 11/10/2017 3:32 PM | 4.1  | 30.2 | 324.3 | 40.6  | 356.9 | 9.597  | 2.6 |
| 11/10/2017 3:33 PM | 3.6  | 27.8 | 322.6 | 59.2  | 473.7 | 10.776 | 2.9 |
| 11/10/2017 3:34 PM | 3    | 25.4 | 263.5 | 74    | 569.6 | 11.813 | 2.9 |
| 11/10/2017 3:35 PM | 1.8  | 23.3 | 223.2 | 87.1  | 434.7 | 9.414  | 2.6 |
| 11/10/2017 3:36 PM | 2.3  | 21.2 | 231.3 | 101   | 463.1 | 7.699  | 2.2 |
| 11/10/2017 3:37 PM | 2.4  | 22.3 | 263.3 | 114.7 | 596.8 | 10.476 | 2.4 |

|                    |      |       |        |       |       |        |      |
|--------------------|------|-------|--------|-------|-------|--------|------|
| 11/10/2017 3:38 PM | 2.5  | 16.6  | 171    | 124.8 | 405.2 | 6.877  | 2    |
| 11/10/2017 3:39 PM | 2.6  | 131.8 | 1554.1 | 129.2 | 684.5 | 22.749 | 5    |
| 11/10/2017 3:40 PM | 2.1  | 180.3 | 2431.8 | 154.2 | 884.4 | 58.878 | 13.1 |
| 11/10/2017 3:41 PM | 1.6  | 47.4  | 405.4  | 207.5 | 358.6 | 42.267 | 10.6 |
| 11/10/2017 3:42 PM | 1    | 12.2  | 179.6  | 247   | 292.8 | 6.585  | 2.6  |
| 11/10/2017 3:43 PM | 1.5  | 13.5  | 164.6  | 262.2 | 292.7 | 4.991  | 1.9  |
| 11/10/2017 3:44 PM | 1.9  | 14.3  | 142.9  | 247.9 | 323.4 | 5.778  | 2.1  |
| 11/10/2017 3:45 PM | 2.1  | 52.2  | 626.6  | 247.1 | 384.5 | 13.160 | 3.6  |
| 11/10/2017 3:46 PM | 1.8  | 54.6  | 542.8  | 185.6 | 413   | 30.302 | 6.1  |
| 11/10/2017 3:47 PM | 2.8  | 10.7  | 22.8   | 107.8 | 50.5  | 4.598  | 3.4  |
| 11/10/2017 3:48 PM | 4.8  | 17.6  | 70.8   | 81.7  | 27.6  | 1.294  | 2    |
| 11/10/2017 3:49 PM | 5.9  | 46    | 555.2  | 60.7  | 316.2 | 18.462 | 4.2  |
| 11/10/2017 3:50 PM | 4.9  | 16.3  | 126.7  | 40.6  | 387.5 | 8.571  | 2.7  |
| 11/10/2017 3:51 PM | 3.9  | 31.5  | 326.9  | 28.5  | 299.7 | 7.842  | 2.4  |
| 11/10/2017 3:52 PM | 2.7  | 27.5  | 349.1  | 23.5  | 637.9 | 14.021 | 3.2  |
| 11/10/2017 3:53 PM | 4    | 11.1  | -5.5   | 21.9  | 94.2  | 2.329  | 2    |
| 11/10/2017 3:54 PM | 4.2  | 34.9  | 429.5  | 20.8  | 352.4 | 10.122 | 3    |
| 11/10/2017 3:55 PM | 4.4  | 64.7  | 901.3  | 29.4  | 648.9 | 25.589 | 5.1  |
| 11/10/2017 3:56 PM | 3    | 16.8  | 206.1  | 36.2  | 415.6 | 10.016 | 3.1  |
| 11/10/2017 3:57 PM | 1.9  | 14.3  | 180.1  | 41.8  | 347.9 | 5.795  | 1.7  |
| 11/10/2017 3:58 PM | 1.8  | 203.3 | 2851.4 | 44.2  | 543.7 | 40.157 | 6.6  |
| 11/10/2017 3:59 PM | 1.6  | 169.4 | 1601.1 | 52.3  | 419.4 | 94.413 | 20.7 |
| 11/10/2017 4:00 PM | 1.2  | 22.8  | 281.2  | 54.3  | 112.5 | 12.942 | 5.1  |
| 11/10/2017 4:01 PM | 1.3  | 62.5  | 670.1  | 49.8  | 118.6 | 25.170 | 5.1  |
| 11/10/2017 4:02 PM | 1.4  | 36.5  | 345.3  | 39.8  | 189.5 | 28.237 | 6.3  |
| 11/10/2017 4:03 PM | 1.6  | 15.7  | 83.4   | 27.7  | 78.7  | 10.425 | 3.5  |
| 11/10/2017 4:04 PM | 2.1  | 15.2  | 119    | 13    | 31.4  | 5.431  | 2.4  |
| 11/10/2017 4:05 PM | 3    | 9.2   | 40.4   | -1.9  | 20.8  | 3.922  | 2.3  |
| 11/10/2017 4:06 PM | 4.2  | 6.4   | 21.6   |       | 5.9   | 0.913  | 1.4  |
| 11/10/2017 4:07 PM | 5.1  | 7.3   | 9.1    |       | 13.3  | 0.466  | 1.5  |
| 11/10/2017 4:08 PM | 5.9  | 10.1  | 10.5   |       | 7     | 0.248  | 1.7  |
| 11/10/2017 4:09 PM | 6.7  | 7.9   | 11.7   |       | 2.5   | 0.127  | 1.2  |
| 11/10/2017 4:10 PM | 7.5  | 10    | 11.9   |       | 2.4   | 0.027  | 1.1  |
| 11/10/2017 4:11 PM | 8.4  | 9.9   | 20.7   |       | 2.5   | 0.121  | 1.1  |
| 11/10/2017 4:12 PM | 8.7  | 10.6  | 31     |       | 2.8   | 0.345  | 1.1  |
| 11/10/2017 4:13 PM | 8.9  | 11.5  | 21.1   |       | 2.4   | 0.258  | 1.5  |
| 11/10/2017 4:14 PM | 9.5  | 11.1  | 9.1    |       | 1.3   | -0.116 | 2.2  |
| 11/10/2017 4:15 PM | 10.3 | 10.9  | 8.8    |       | 1.6   | -0.022 | 3    |
| 11/10/2017 4:16 PM | 10.9 | 9.8   | 11.4   |       | 2.1   | 0.152  | 7.3  |
| 11/10/2017 4:17 PM | 11.4 | 13.1  | 14.9   |       | 1.5   | -0.075 | 6.8  |
| 11/10/2017 4:18 PM | 11.7 | 12.8  | 11.4   |       | 1.5   | -0.171 | 7.2  |
| 11/10/2017 4:19 PM | 11.9 | 10.7  | 12     |       | 1.3   | -0.195 | 5.8  |
| 11/10/2017 4:20 PM | 11.8 | 11    | 13.1   |       | 1.4   | -0.144 | 3.1  |
| 11/10/2017 4:21 PM | 11.9 | 13.1  | 12.1   |       | 1.4   | -0.224 | 6.3  |
| 11/10/2017 4:22 PM | 12.2 | 15.2  | 12.4   |       | 1.9   | -0.046 | 6.5  |
| 11/10/2017 4:23 PM | 13   | 13.1  | 12.9   |       | 1.6   | -0.186 | 4    |
| 11/10/2017 4:24 PM | 13.5 | 13.6  | 14.3   |       | 1.8   | 0.080  | 5.7  |

|                    |      |      |      |      |        |     |
|--------------------|------|------|------|------|--------|-----|
| 11/10/2017 4:25 PM | 13.8 | 14.5 | 13.7 | 1.4  | -0.145 | 7.5 |
| 11/10/2017 4:26 PM | 13.4 | 12.2 | 15.2 | 1.6  | -0.075 | 6.1 |
| 11/10/2017 4:27 PM | 13.4 | 14.9 | 13.6 | 1.2  | -0.189 | 6.5 |
| 11/10/2017 4:28 PM | 12.5 | 14.6 | 14.2 | 1.2  | -0.158 | 6.6 |
| 11/10/2017 4:29 PM | 12.1 | 14   | 13.5 | 3.1  | 0.345  | 4.5 |
| 11/10/2017 4:30 PM |      | 16   | 15.1 | 1.5  | -0.225 | 9.7 |
| 11/10/2017 4:31 PM |      | 11.2 | 17.7 | 1.5  | -0.191 | 4.5 |
| 11/10/2017 4:32 PM |      | 16   | 15.3 | 1.4  | -0.214 | 7.3 |
| 11/10/2017 4:33 PM |      | 17.6 | 14.6 | 1.5  | -0.202 | 6.6 |
| 11/10/2017 4:34 PM |      | 16.9 | 15.3 | 2.6  | 0.700  | 2.3 |
| 11/10/2017 4:35 PM |      | 16.7 | 15.8 | 1.2  | -0.227 | 2.2 |
| 11/10/2017 4:36 PM |      | 16.3 | 14.7 | 1    | -0.223 | 6.5 |
| 11/10/2017 4:37 PM |      | 16.4 | 16.1 | 3.5  | 0.883  | 2.2 |
| 11/10/2017 4:38 PM |      | 16.3 | 15.9 | 2.3  | -0.135 | 1   |
| 11/10/2017 4:39 PM |      | 16.9 | 15.6 | 9.3  | -0.206 | 0.8 |
| 11/10/2017 4:40 PM |      | 17.1 | 16.9 | 1.9  | 0.029  | 0.8 |
| 11/10/2017 4:41 PM |      | 17.7 | 16.2 | 7.1  | 1.954  | 0.8 |
| 11/10/2017 4:42 PM |      | 17.7 | 16.8 | 4.7  | 0.480  | 0.9 |
| 11/10/2017 4:43 PM |      | 18.5 | 16.7 | 5.1  | 1.656  | 1   |
| 11/10/2017 4:44 PM |      | 18.6 | 17   | 4.6  | 0.867  | 0.9 |
| 11/10/2017 4:45 PM |      | 15.6 | 15.6 | 13   | -0.053 | 0.9 |
| 11/10/2017 4:46 PM |      | 20   | 17.7 | 1.7  | -0.201 | 0.9 |
| 11/10/2017 4:47 PM |      | 18.3 | 17.3 | 2.2  | -0.014 | 0.9 |
| 11/10/2017 4:48 PM |      | 17.8 | 17.3 | 3.1  | 0.624  | 0.9 |
| 11/10/2017 4:49 PM |      | 20.8 | 17.7 | 2.2  | 0.157  | 0.9 |
| 11/10/2017 4:50 PM |      | 18   | 18   | 2.2  | 0.033  | 0.9 |
| 11/10/2017 4:51 PM |      | 18.5 | 18.1 | 1.6  | -0.110 | 0.9 |
| 11/10/2017 4:52 PM |      | 18   | 16.5 | 5.5  | 0.184  | 0.9 |
| 11/10/2017 4:53 PM |      | 20   | 18   | 2.3  | -0.154 | 0.9 |
| 11/10/2017 4:54 PM |      | 17.3 | 17.4 | 2.9  | 0.152  | 0.9 |
| 11/10/2017 4:55 PM |      | 20.4 | 17.2 | 6.5  | 1.565  | 0.9 |
| 11/10/2017 4:56 PM |      | 18   | 16.7 | 12.5 | 1.854  | 1.1 |
| 11/10/2017 4:57 PM |      | 18.1 | 16.1 | 12.5 | 2.164  | 1.1 |
| 11/10/2017 4:58 PM |      | 19   | 18   | 6.1  | 1.974  | 1   |
| 11/10/2017 4:59 PM |      | 18.1 | 17.8 | 6.2  | 1.580  | 1   |
| 11/10/2017 5:00 PM |      | 18.6 | 15.9 | 10.9 | 0.476  | 0.9 |
| 11/10/2017 5:01 PM | 17.7 | 19.5 | 17.2 | 9.9  | 2.094  | 1   |
| 11/10/2017 5:02 PM | 17.8 | 18.2 | 17.1 | 5.9  | 1.568  | 1   |
| 11/10/2017 5:03 PM | 18.2 | 20   | 17.8 | 6.9  | 1.366  | 0.9 |
| 11/10/2017 5:04 PM | 18.9 | 18.8 | 18   | 3.6  | 1.055  | 0.9 |
| 11/10/2017 5:05 PM | 19   | 19.3 | 17.5 | 6.3  | 1.735  | 1   |
| 11/10/2017 5:06 PM | 19.1 | 19.1 | 18.1 | 3    | 0.587  | 1.1 |
| 11/10/2017 5:07 PM | 18.9 | 19.4 | 17.4 | 3.8  | 0.437  | 1   |
| 11/10/2017 5:08 PM | 19   | 19.3 | 17.9 | 4.1  | 0.686  | 1   |
| 11/10/2017 5:09 PM | 19.1 | 18.8 | 18.3 | 2.4  | 0.106  | 1   |
| 11/10/2017 5:10 PM | 19.4 | 19.3 | 18.5 | 5.9  | 1.050  | 1   |
| 11/10/2017 5:11 PM | 19.8 | 19.7 | 18.8 | 2.7  | 0.157  | 1   |

|                    |      |      |      |      |        |      |
|--------------------|------|------|------|------|--------|------|
| 11/10/2017 5:12 PM | 19.9 | 20.8 | 18.9 | 1.9  | -0.121 | 1    |
| 11/10/2017 5:13 PM | 18.3 | 15.2 | 16.6 | 59.6 | 25.851 | 1.3  |
| 11/10/2017 5:14 PM | 15.2 | 16.7 | 13.4 | 49.3 | 17.082 | 1.2  |
| 11/10/2017 5:15 PM | 13.8 | 17   | 14.9 | 12.4 | 5.068  | 1    |
| 11/10/2017 5:16 PM | 14.7 | 18.3 | 16.6 | 4.7  | 0.420  | 1    |
| 11/10/2017 5:17 PM | 17.5 | 19.5 | 17.6 | 2.3  | -0.091 | 1    |
| 11/10/2017 5:18 PM | 18.6 | 18.2 | 18   | 1.8  | -0.171 | 1    |
| 11/10/2017 5:19 PM | 19.2 | 18.8 | 17.6 | 2.2  | -0.208 | 2.3  |
| 11/10/2017 5:20 PM | 19.3 | 20   | 18.4 | 2.5  | -0.222 | 2.3  |
| 11/10/2017 5:21 PM | 19.3 | 23.1 | 19.8 | 2.7  | -0.219 | 4.1  |
| 11/10/2017 5:22 PM | 19   | 30.1 | 24.5 | 3.5  | -0.227 | 10.8 |
| 11/10/2017 5:23 PM | 18.7 | 23.4 | 19.1 | 2.8  | -0.233 | 4.5  |
| 11/10/2017 5:24 PM | 18.4 | 20.9 | 18.2 | 3.4  | -0.219 | 2.6  |
| 11/10/2017 5:25 PM | 17.9 | 16.1 | 14.1 | 8.4  | -0.212 | 1.9  |
| 11/10/2017 5:26 PM | 16.5 | 14.2 | 13.7 | 18.3 | -0.143 | 1.3  |
| 11/10/2017 5:27 PM | 15.1 | 15.3 | 15.1 | 14.4 | -0.148 | 1.1  |
| 11/10/2017 5:28 PM | 14.7 | 14.9 | 13.6 | 13.9 | -0.176 | 1    |
| 11/10/2017 5:29 PM | 15   | 15.1 | 14   | 6.6  | -0.206 | 1    |
| 11/10/2017 5:30 PM | 15.4 | 17.1 | 17.5 | 5.3  | -0.065 | 1.3  |
| 11/10/2017 5:31 PM | 15.5 | 16   | 16.2 | 10.9 | -0.010 | 1.5  |
| 11/10/2017 5:32 PM | 15.6 | 14   | 15   | 7.5  | -0.162 | 1.2  |
| 11/10/2017 5:33 PM | 15.1 | 13.8 | 14   | 5.1  | -0.195 | 1.1  |
| 11/10/2017 5:34 PM | 14.7 | 14.9 | 15   | 9.7  | -0.212 | 1.1  |
| 11/10/2017 5:35 PM | 14.5 | 13.8 | 15.2 | 8.7  | -0.215 | 1    |
| 11/10/2017 5:36 PM | 15.1 | 16.1 | 17.4 | 10.4 | -0.214 | 1.2  |
| 11/10/2017 5:37 PM | 15.6 | 16.9 | 16.8 | 5.5  | -0.223 | 1.4  |
| 11/10/2017 5:38 PM | 15.7 | 14.6 | 16.5 | 3.6  | -0.213 | 1.1  |
| 11/10/2017 5:39 PM | 15.8 | 14.8 | 16.2 | 7    | -0.224 | 1    |
| 11/10/2017 5:40 PM | 16   | 17.3 | 17   | 13.7 | -0.234 | 0.9  |
| 11/10/2017 5:41 PM | 16.4 | 15.8 | 16.4 | 6    | -0.169 | 0.9  |
| 11/10/2017 5:42 PM | 16.4 | 14.8 | 16.9 | 4.9  | -0.128 | 0.9  |
| 11/10/2017 5:43 PM | 15.8 | 14.3 | 14.6 | 4.2  | -0.158 | 0.9  |
| 11/10/2017 5:44 PM | 15.3 | 15.7 | 15.5 | 6.1  | -0.231 | 0.8  |
| 11/10/2017 5:45 PM | 15.5 | 14.6 | 15.9 | 9.5  | -0.242 | 0.8  |
| 11/10/2017 5:46 PM | 16.1 | 16.5 | 16.5 | 7.4  | -0.244 | 0.8  |
| 11/10/2017 5:47 PM | 16.5 | 14   | 15.6 | 5.4  | -0.254 | 0.8  |
| 11/10/2017 5:48 PM | 16.1 | 15.6 | 15.5 | 8.7  | -0.251 | 0.7  |
| 11/10/2017 5:49 PM | 15.6 | 15.9 | 15.7 | 6.2  | -0.254 | 0.7  |
| 11/10/2017 5:50 PM | 15.2 | 15.6 | 15.1 | 9.4  | -0.252 | 0.7  |
| 11/10/2017 5:51 PM | 14.9 | 13.5 | 14   | 17.1 | -0.261 | 0.7  |
| 11/10/2017 5:52 PM | 14.7 | 15.3 | 14   | 2    | -0.254 | 0.7  |
| 11/10/2017 5:53 PM | 14.7 | 13   | 14.1 | 1.7  | -0.256 | 0.6  |
| 11/10/2017 5:54 PM | 15.1 | 15.8 | 15.1 | 1.8  | -0.257 | 0.6  |
| 11/10/2017 5:55 PM | 15.5 | 14   | 15   | 1.6  | -0.254 | 0.6  |
| 11/10/2017 5:56 PM | 15.9 | 15.4 | 15.1 | 1.3  | -0.245 | 0.5  |
| 11/10/2017 5:57 PM | 16.1 | 13.8 | 14.7 | 1.6  | -0.250 | 0.5  |
| 11/10/2017 5:58 PM | 16.1 | 15.2 | 14.8 | 1.5  | -0.255 | 0.5  |



|                    |      |      |      |     |        |      |
|--------------------|------|------|------|-----|--------|------|
| 11/10/2017 5:59 PM | 15.9 | 14.8 | 14.4 | 1.5 | -0.249 | 0.4  |
| 11/10/2017 6:00 PM | 15.5 | 14.2 | 14.2 | 1.8 | -0.247 | 0.5  |
| 11/10/2017 6:01 PM | 14.5 | 12.5 | 11.9 | 2.2 | -0.237 | 0.5  |
| 11/10/2017 6:02 PM | 12.6 | 6.5  | 8.8  | 2.7 | -0.241 | 0.5  |
| 11/10/2017 6:03 PM | 9.9  | 5.1  | 6.9  | 3   | -0.249 | 0.5  |
| 11/10/2017 6:04 PM | 7.2  | 1.6  | 5.9  | 3.6 | -0.237 | 0.5  |
| 11/10/2017 6:05 PM | 5    | 2.3  | 5.2  | 3.8 | -0.228 | 0.5  |
| 11/10/2017 6:06 PM | 3.7  | 0.3  | 5    | 4.1 | -0.233 | 0.5  |
| 11/10/2017 6:07 PM | 2.9  | 2.9  | 5.1  | 4.4 | -0.232 | 0.5  |
| 11/10/2017 6:08 PM | 2.5  | 2.3  | 5.2  | 4.7 | -0.220 | 0.6  |
| 11/10/2017 6:09 PM | 3    | 8.4  | 10.5 | 4.2 | -0.221 | 0.5  |
| 11/10/2017 6:10 PM | 7    | 15.3 | 16.7 | 1.8 | -0.232 | -1   |
| 11/10/2017 6:11 PM | 11.5 | 13.4 | 13.8 | 2   | -0.227 | -1.5 |
| 11/10/2017 6:12 PM | 13.6 | 7.8  | 9.7  | 2.5 | -0.219 | -1.5 |
| 11/10/2017 6:13 PM | 11.4 | 4.5  | 7.7  | 3.1 | -0.224 | -1.5 |
| 11/10/2017 6:14 PM | 7.7  | 3.4  | 6.5  | 3.2 | -0.224 | -1.5 |
| 11/10/2017 6:15 PM | 5.3  | 2.9  | 5.7  | 3.8 | -0.222 | -1.5 |
| 11/10/2017 6:16 PM | 3.9  | 2.8  | 5.4  | 4.4 | -0.209 | -1.5 |
| 11/10/2017 6:17 PM | 3.1  | 2.5  | 5.4  | 4.6 | -0.213 | -1.5 |
| 11/10/2017 6:18 PM | 2.5  | 1.8  | 5.2  | 4.6 | -0.209 | -1.5 |
| 11/10/2017 6:19 PM | 2.2  | 0.8  | 5.2  | 4.8 | -0.201 | -1.5 |
| 11/10/2017 6:20 PM | 2    | 0.6  | 5.3  | 5.1 | -0.209 | -1.5 |
| 11/10/2017 6:21 PM | 1.9  | 1.3  | 5.4  | 5.2 | -0.217 | -1.5 |
| 11/10/2017 6:22 PM | 1.9  | 2    | 5.2  | 5.4 | -0.208 | -1.5 |
| 11/10/2017 6:23 PM | 1.9  | 1    | 5.6  | 5.6 | -0.201 | -1.5 |
| 11/10/2017 6:24 PM | 1.9  | 1.1  | 5.5  | 5.7 | -0.204 | -1.5 |
| 11/10/2017 6:25 PM | 2    | 1.5  | 5.7  | 6   | -0.206 | -1.5 |
| 11/10/2017 6:26 PM | 2    | 1.3  | 5.5  | 6.4 | -0.196 | -1.5 |
| 11/10/2017 6:27 PM | 2    | 2    | 6    | 6.4 | -0.199 | -1.5 |
| 11/10/2017 6:28 PM | 2    | 0.9  | 5.7  | 6.4 | -0.203 | -1.5 |
| 11/10/2017 6:29 PM | 2    | 2.2  | 6.1  | 6.5 | -0.200 | -1.5 |
| 11/10/2017 6:30 PM | 2.2  | 1.7  | 6.2  | 6.2 | -0.199 | -1.5 |
| 11/10/2017 6:31 PM | 2.3  | 1.5  | 6.3  | 6.1 | -0.203 | -1.5 |
| 11/10/2017 6:32 PM | 2.3  | 2    | 6.4  | 5.8 | -0.220 | -1.5 |
| 11/10/2017 6:33 PM | 2.3  | 0.7  | 5.8  | 5.9 | -0.204 | -1.5 |
| 11/10/2017 6:34 PM | 2.3  | 1.9  | 6.5  | 5.9 | -0.205 | -1.5 |
| 11/10/2017 6:35 PM | 2.3  | 3.1  | 6.5  | 5.9 | -0.216 | -1.5 |
| 11/10/2017 6:36 PM | 2.4  | 2.4  | 6.1  | 5.6 | -0.213 | -1.5 |
| 11/10/2017 6:37 PM | 2.4  | 0.7  | 5.8  | 5.6 | -0.210 | -1.5 |
| 11/10/2017 6:38 PM | 2.2  | 2.1  | 5.8  | 5.8 | -0.209 | -1.5 |
| 11/10/2017 6:39 PM | 2    | 1.3  | 6    | 5.5 | -0.213 | -1.5 |
| 11/10/2017 6:40 PM | 2    | 1.9  | 6.4  | 5.5 | -0.218 | -1.5 |
| 11/10/2017 6:41 PM | 2.1  | 0.6  | 6.3  | 5.6 | -0.208 | -1.5 |
| 11/10/2017 6:42 PM | 2.2  | 2    | 6.5  | 6   | -0.216 | -1.5 |
| 11/10/2017 6:43 PM | 2.4  | 1.9  | 6.4  | 5.6 | -0.224 | -1.5 |
| 11/10/2017 6:44 PM | 2.4  | 2.8  | 6.6  | 5.7 | -0.219 | -1.5 |
| 11/10/2017 6:45 PM | 2.5  | 1.2  | 6.5  | 5.7 | -0.216 | -1.5 |

|                    |     |     |     |     |        |      |
|--------------------|-----|-----|-----|-----|--------|------|
| 11/10/2017 6:46 PM | 2.4 | 0.6 | 6.5 | 5.7 | -0.220 | -1.5 |
| 11/10/2017 6:47 PM | 2.3 | 0   | 6.4 | 5.7 | -0.225 | -1.5 |
| 11/10/2017 6:48 PM | 2.3 | 2.3 | 6.5 | 5.5 | -0.215 | -1.5 |
| 11/10/2017 6:49 PM | 2.3 | 0.1 | 6.2 | 5.5 | -0.218 | -1.5 |
| 11/10/2017 6:50 PM | 2.5 | 2.1 | 6.7 | 5.4 | -0.225 | -1.5 |
| 11/10/2017 6:51 PM | 2.6 | 1.8 | 7   | 5.3 | -0.225 | -1.5 |
| 11/10/2017 6:52 PM | 2.6 | 2.2 | 6.7 | 5.5 | -0.216 | -1.5 |
| 11/10/2017 6:53 PM | 2.7 | 2.4 | 6.6 | 5.4 | -0.227 | -1.5 |
| 11/10/2017 6:54 PM | 2.6 | 1.6 | 6.7 | 5.4 | -0.227 | -1.5 |
| 11/10/2017 6:55 PM | 2.6 | 2.4 | 6.9 | 5.3 | -0.221 | -1.5 |
| 11/10/2017 6:56 PM | 2.7 | 2.7 | 7   | 5   | -0.229 | -1.5 |
| 11/10/2017 6:57 PM | 2.7 | 3.4 | 6.6 | 5.3 | -0.232 | -1.5 |
| 11/10/2017 6:58 PM | 2.7 | 2.8 | 6.8 | 5.2 | -0.225 | -1.5 |
| 11/10/2017 6:59 PM | 2.6 | 0.5 | 6.7 | 5.4 | -0.219 | -1.5 |
| 11/10/2017 7:00 PM | 2.6 | 2.7 | 6.8 | 5.4 | -0.229 | -1.5 |
| 11/10/2017 7:01 PM | 2.5 | 0.8 | 6.7 | 5.1 | -0.228 | -1.5 |
| 11/10/2017 7:02 PM | 2.4 | 2.2 | 6.8 | 5.2 | -0.218 | -1.5 |
| 11/10/2017 7:03 PM | 2.6 | 2.1 | 7.1 | 5.1 | -0.231 | -1.5 |
| 11/10/2017 7:04 PM | 2.8 | 1.9 | 7.4 | 5.1 | -0.236 | -1.5 |
| 11/10/2017 7:05 PM | 3.1 | 2   | 7.4 | 4.7 | -0.226 | -1.5 |
| 11/10/2017 7:06 PM | 3.3 | 2.7 | 7.1 | 4.8 | -0.229 | -1.5 |
| 11/10/2017 7:07 PM | 3.3 | 2.7 | 7.3 | 4.9 | -0.233 | -1.5 |
| 11/10/2017 7:08 PM | 3.2 | 1.7 | 7.2 | 5.1 | -0.232 | -1.5 |
| 11/10/2017 7:09 PM | 3.3 | 2.2 | 7.3 | 4.7 | -0.227 | -1.5 |
| 11/10/2017 7:10 PM | 3.3 | 1.8 | 7.1 | 4.8 | -0.228 | -1.5 |
| 11/10/2017 7:11 PM | 3.3 | 1.4 | 7.2 | 4.9 | -0.240 | -1.5 |
| 11/10/2017 7:12 PM | 3.2 | 2   | 7   | 5   | -0.231 | -1.5 |
| 11/10/2017 7:13 PM | 3   | 1.8 | 7   | 4.9 | -0.229 | -1.5 |
| 11/10/2017 7:14 PM | 3   | 1.3 | 6.9 | 4.9 | -0.235 | -1.5 |
| 11/10/2017 7:15 PM | 3.1 | 2.1 | 7.4 | 4.7 | -0.238 | -1.5 |
| 11/10/2017 7:16 PM | 3.2 | 3.5 | 7.7 | 4.8 | -0.233 | -1.5 |
| 11/10/2017 7:17 PM | 3.4 | 2.2 | 7.4 | 4.5 | -0.227 | -1.5 |
| 11/10/2017 7:18 PM | 3.6 | 0.7 | 7.4 | 4.6 | -0.233 | -1.5 |
| 11/10/2017 7:19 PM | 3.6 | 3   | 7.1 | 4.7 | -0.235 | -1.5 |
| 11/10/2017 7:20 PM | 3.4 | 2.1 | 7.1 | 4.4 | -0.227 | -1.5 |
| 11/10/2017 7:21 PM | 3.2 | 2.3 | 6.6 | 4.7 | -0.222 | -1.5 |
| 11/10/2017 7:22 PM | 3.1 | 1.2 | 7   | 4.9 | -0.235 | -1.5 |
| 11/10/2017 7:23 PM | 3   | 2.4 | 7.1 | 4.8 | -0.234 | -1.5 |
| 11/10/2017 7:24 PM | 3.1 | 1.6 | 7.1 | 4.8 | -0.228 | -1.5 |
| 11/10/2017 7:25 PM | 3   | 2.9 | 6.9 | 4.7 | -0.229 | -1.5 |
| 11/10/2017 7:26 PM | 3   | 2.5 | 7.3 | 5.1 | -0.237 | -1.5 |
| 11/10/2017 7:27 PM | 3   | 2.5 | 7.1 | 4.8 | -0.230 | -1.5 |
| 11/10/2017 7:28 PM | 3.1 | 2.5 | 6.7 | 4.7 | -0.227 | -1.5 |
| 11/10/2017 7:29 PM | 3.1 | 2.4 | 7.1 | 4.8 | -0.238 | -1.5 |
| 11/10/2017 7:30 PM | 3   | 1.9 | 7.2 | 4.6 | -0.234 | -1.5 |
| 11/10/2017 7:31 PM | 3.1 | 3.8 | 7.5 | 4.9 | -0.227 | -1.5 |
| 11/10/2017 7:32 PM | 3.2 | 2.1 | 7.1 | 4.6 | -0.230 | -1.5 |

|                    |     |     |     |     |     |        |      |
|--------------------|-----|-----|-----|-----|-----|--------|------|
| 11/10/2017 7:33 PM | 3.4 | 2.8 | 7.2 |     | 4.6 | -0.237 | -1.5 |
| 11/10/2017 7:34 PM | 3.4 | 2.9 | 7.2 |     | 4.6 | -0.233 | -1.5 |
| 11/10/2017 7:35 PM | 3.4 | 2.4 | 7   |     | 4.7 | -0.225 | -1.5 |
| 11/10/2017 7:36 PM | 3.3 | 2.3 | 7.2 |     | 4.9 | -0.236 | -1.5 |
| 11/10/2017 7:37 PM | 3.3 | 1.7 | 7.6 |     | 4.6 | -0.233 | -1.5 |
| 11/10/2017 7:38 PM | 3.4 | 1.6 | 7.1 |     | 4.7 | -0.236 | -1.5 |
| 11/10/2017 7:39 PM | 3.5 | 3.2 | 7.3 |     | 4.5 | -0.230 | -1.5 |
| 11/10/2017 7:40 PM | 3.4 | 3.4 | 7.2 |     | 4.4 | -0.248 | -1.5 |
| 11/10/2017 7:41 PM | 3.4 | 3   | 7.5 |     | 4.3 | -0.232 | -1.5 |
| 11/10/2017 7:42 PM | 3.5 | 4.5 | 7.9 |     | 4.3 | -0.228 | -1.5 |
| 11/10/2017 7:43 PM | 3.8 | 3.5 | 7.8 |     | 4.1 | -0.239 | -1.5 |
| 11/10/2017 7:44 PM | 4   | 2   | 8.1 |     | 4   | -0.240 | -1.5 |
| 11/10/2017 7:45 PM | 3.9 | 2.6 | 7.5 |     | 4.2 | -0.235 | -1.5 |
| 11/10/2017 7:46 PM | 3.8 | 3.4 | 7.4 |     | 4.4 | -0.236 | -1.5 |
| 11/10/2017 7:47 PM | 3.6 | 3.2 | 7.2 |     | 4.7 | -0.236 | -1.5 |
| 11/10/2017 7:48 PM | 3.4 | 3.2 | 7   |     | 4.4 | -0.241 | -1.5 |
| 11/10/2017 7:49 PM | 3.3 | 3   | 7.5 |     | 4.7 | -0.231 | -1.5 |
| 11/10/2017 7:50 PM | 3.2 | 2   | 7.2 |     | 4.4 | -0.236 | -1.5 |
| 11/10/2017 7:51 PM | 3.3 | 2.4 | 7.3 | 1.8 | 4.8 | -0.235 | -1.5 |
| 11/10/2017 7:52 PM | 3.4 | 2.8 | 7.3 | 1.8 | 4.4 | -0.243 | -1.5 |
| 11/10/2017 7:53 PM | 3.4 | 1.7 | 7.3 | 1.8 | 4.5 | -0.241 | -1.5 |
| 11/10/2017 7:54 PM | 3.4 | 2.9 | 7.4 | 1.9 | 4.6 | -0.231 | -1.5 |
| 11/10/2017 7:55 PM | 3.4 | 2.9 | 7.2 | 1.9 | 4.5 | -0.242 | -1.5 |
| 11/10/2017 7:56 PM | 3.3 | 1.5 | 6.9 | 1.8 | 4.7 | -0.243 | -1.5 |
| 11/10/2017 7:57 PM | 3.1 | 1.8 | 6.8 | 1.8 | 5   | -0.231 | -1.5 |
| 11/10/2017 7:58 PM | 2.9 | 2.1 | 6.8 | 1.8 | 4.9 | -0.233 | -1.5 |
| 11/10/2017 7:59 PM | 2.8 | 1   | 6.8 | 1.8 | 4.9 | -0.242 | -1.5 |
| 11/10/2017 8:00 PM | 2.8 | 2.6 | 6.8 | 1.8 | 5   | -0.238 | -1.5 |
| 11/10/2017 8:01 PM | 2.9 | 3.4 | 7.1 | 1.8 | 5   | -0.229 | -1.5 |
| 11/10/2017 8:02 PM | 2.9 | 1.7 | 6.9 | 1.8 | 5   | -0.233 | -1.5 |
| 11/10/2017 8:03 PM | 3   | 1.5 | 6.9 | 1.8 | 4.8 | -0.248 | -1.5 |
| 11/10/2017 8:04 PM | 3.1 | 3.2 | 7.3 | 1.8 | 4.6 | -0.235 | -1.5 |
| 11/10/2017 8:05 PM | 3.2 | 1   | 7.2 | 1.8 | 4.8 | -0.233 | -1.5 |
| 11/10/2017 8:06 PM | 3.2 | 1.7 | 7.1 | 1.8 | 4.8 | -0.236 | -1.5 |
| 11/10/2017 8:07 PM | 3.2 | 3.3 | 7.3 | 1.8 | 4.6 | -0.251 | -1.5 |
| 11/10/2017 8:08 PM | 3.2 | 1.9 | 7.1 | 1.8 | 4.6 | -0.236 | -1.5 |
| 11/10/2017 8:09 PM | 3.2 | 1.8 | 7   | 1.7 | 5   | -0.237 | -1.5 |
| 11/10/2017 8:10 PM | 3.2 | 2.8 | 7.1 | 1.7 | 4.9 | -0.243 | -1.5 |
| 11/10/2017 8:11 PM | 3.1 | 1.5 | 7   | 1.8 | 4.9 | -0.234 | -1.5 |
| 11/10/2017 8:12 PM | 3.1 | 1.9 | 7.1 | 1.8 | 5   | -0.232 | -1.5 |
| 11/10/2017 8:13 PM | 3.1 | 2.2 | 7.2 | 1.7 | 5   | -0.237 | -1.5 |
| 11/10/2017 8:14 PM | 3.2 | 2.8 | 7.1 | 1.7 | 5   | -0.243 | -1.5 |
| 11/10/2017 8:15 PM | 3.4 | 5.1 | 7.5 | 1.7 | 4.7 | -0.234 | -1.5 |
| 11/10/2017 8:16 PM | 3.4 | 2.6 | 7.3 | 1.8 | 4.8 | -0.233 | -1.5 |
| 11/10/2017 8:17 PM | 3.4 | 1.9 | 7.5 | 1.7 | 4.5 | -0.243 | -1.5 |
| 11/10/2017 8:18 PM | 3.3 | 3.2 | 7.1 | 1.7 | 4.6 | -0.243 | -1.5 |
| 11/10/2017 8:19 PM | 3.1 | 1.7 | 6.7 | 1.7 | 5   | -0.230 | -1.5 |

|                    |     |     |     |     |     |        |      |
|--------------------|-----|-----|-----|-----|-----|--------|------|
| 11/10/2017 8:20 PM | 3   | 3.3 | 6.5 | 1.7 | 5.1 | -0.234 | -1.5 |
| 11/10/2017 8:21 PM | 2.8 | 1.8 | 6.8 | 1.7 | 5   | -0.238 | -1.5 |
| 11/10/2017 8:22 PM | 2.9 | 2.7 | 6.9 | 1.7 | 4.9 | -0.240 | -1.5 |
| 11/10/2017 8:23 PM | 2.9 | 2.4 | 7   | 1.7 | 5.1 | -0.232 | -1.5 |
| 11/10/2017 8:24 PM | 3.1 | 2.7 | 7.2 | 1.7 | 4.9 | -0.234 | -1.5 |
| 11/10/2017 8:25 PM | 3.2 | 1.6 | 7.4 | 1.7 | 4.8 | -0.241 | -1.5 |
| 11/10/2017 8:26 PM | 3.3 | 2   | 7.1 | 1.7 | 4.9 | -0.240 | -1.5 |
| 11/10/2017 8:27 PM | 3.3 | 2.4 | 7.6 | 1.7 | 4.9 | -0.232 | -1.5 |
| 11/10/2017 8:28 PM | 3.3 | 2   | 7.2 | 1.7 | 4.7 | -0.240 | -1.5 |
| 11/10/2017 8:29 PM | 3.3 | 2.5 | 7.3 | 1.7 | 4.7 | -0.242 | -1.5 |
| 11/10/2017 8:30 PM | 3.3 | 2.7 | 7.4 | 1.7 | 4.8 | -0.234 | -1.5 |
| 11/10/2017 8:31 PM | 3.4 | 2.1 | 7.5 | 1.7 | 4.8 | -0.238 | -1.5 |
| 11/10/2017 8:32 PM | 3.5 | 3.2 | 7.1 | 1.7 | 4.6 | -0.247 | -1.5 |
| 11/10/2017 8:33 PM | 3.7 | 4.1 | 7.8 | 1.7 | 4.7 | -0.230 | -1.5 |
| 11/10/2017 8:34 PM | 3.7 | 2.9 | 7.2 | 1.7 | 4.6 | -0.233 | -1.5 |
| 11/10/2017 8:35 PM | 3.7 | 2.6 | 7.4 | 1.7 | 4.7 | -0.247 | -1.5 |
| 11/10/2017 8:36 PM | 3.5 | 2.4 | 7.4 | 1.7 | 5   | -0.239 | -1.5 |
| 11/10/2017 8:37 PM | 3.5 | 1.9 | 7.9 | 1.7 | 4.8 | -0.233 | -1.5 |
| 11/10/2017 8:38 PM | 3.6 | 3   | 7.8 | 1.7 | 4.5 | -0.236 | -1.5 |
| 11/10/2017 8:39 PM | 3.7 | 3.4 | 7.7 | 1.7 | 4.6 | -0.247 | -1.5 |
| 11/10/2017 8:40 PM | 3.7 | 2.3 | 7.6 | 1.7 | 4.7 | -0.236 | -1.5 |
| 11/10/2017 8:41 PM | 3.7 | 3.4 | 7.6 | 1.7 | 4.4 | -0.235 | -1.5 |
| 11/10/2017 8:42 PM | 3.7 | 2.1 | 7.5 | 1.7 | 4.4 | -0.246 | -1.5 |
| 11/10/2017 8:43 PM | 3.7 | 3.8 | 7.1 | 1.7 | 4.6 | -0.238 | -1.5 |
| 11/10/2017 8:44 PM | 3.7 | 1.8 | 7.8 | 1.7 | 4.8 | -0.236 | -1.5 |
| 11/10/2017 8:45 PM | 3.6 | 3.9 | 7.7 | 1.7 | 4.5 | -0.237 | -1.5 |
| 11/10/2017 8:46 PM | 3.7 | 3.1 | 7.5 | 1.7 | 4.4 | -0.245 | -1.5 |
| 11/10/2017 8:47 PM | 3.8 | 2.2 | 7.4 | 1.7 | 4.5 | -0.241 | -1.5 |
| 11/10/2017 8:48 PM | 3.7 | 0.3 | 7.1 | 1.7 | 4.7 | -0.234 | -1.5 |
| 11/10/2017 8:49 PM | 3.5 | 2.5 | 7.4 | 1.7 | 4.4 | -0.248 | -1.5 |
| 11/10/2017 8:50 PM | 3.5 | 3.5 | 7.3 | 1.7 | 4.6 | -0.246 | -1.5 |
| 11/10/2017 8:51 PM | 3.5 | 2.1 | 7.8 | 1.7 | 4.5 | -0.234 | -1.5 |
| 11/10/2017 8:52 PM | 3.7 | 2.9 | 7.7 | 1.9 | 4.6 | -0.239 | -1.5 |
| 11/10/2017 8:53 PM | 3.7 | 3.9 | 7.5 | 2.1 | 4.6 | -0.248 | -1.5 |
| 11/10/2017 8:54 PM | 3.7 | 3.7 | 7.4 | 2   | 4.7 | -0.238 | -1.5 |
| 11/10/2017 8:55 PM | 3.7 | 1.6 | 7.4 | 2   | 5   | -0.235 | -1.5 |
| 11/10/2017 8:56 PM | 3.6 | 4   | 7.6 | 2   | 4.5 | -0.243 | -1.5 |
| 11/10/2017 8:57 PM | 3.5 | 2.4 | 7.5 | 2   | 4.6 | -0.244 | -1.5 |
| 11/10/2017 8:58 PM | 3.6 | 2.9 | 7.6 | 2   | 4.7 | -0.236 | -1.5 |
| 11/10/2017 8:59 PM | 3.6 | 3.1 | 7.5 | 2   | 4.7 | -0.248 | -1.5 |
| 11/10/2017 9:00 PM | 3.8 | 3.6 | 7.7 | 2   | 4.7 | -0.247 | -1.5 |
| 11/10/2017 9:01 PM | 3.8 | 3.3 | 7.6 | 2   | 4.9 | -0.241 | -1.5 |
| 11/10/2017 9:02 PM | 3.9 | 3.6 | 7.8 | 2.1 | 4.9 | -0.231 | -1.5 |
| 11/10/2017 9:03 PM | 4   | 3.5 | 7.8 | 2.1 | 5.1 | -0.235 | -1.5 |
| 11/10/2017 9:04 PM | 4.1 | 4   | 7.8 | 2.2 | 5.2 | -0.246 | -1.5 |
| 11/10/2017 9:05 PM | 4.2 | 5.4 | 8.2 | 2.3 | 5.4 | -0.241 | -1.5 |
| 11/10/2017 9:06 PM | 4.1 | 1.8 | 7.5 | 2.4 | 5.4 | -0.237 | -1.5 |

|                    |     |     |     |     |     |        |      |
|--------------------|-----|-----|-----|-----|-----|--------|------|
| 11/10/2017 9:07 PM | 4.1 | 3.3 | 7.5 | 2.4 | 5.7 | -0.249 | -1.5 |
| 11/10/2017 9:08 PM | 3.9 | 2.1 | 7.5 | 2.5 | 5.7 | -0.248 | -1.5 |
| 11/10/2017 9:09 PM | 3.8 | 2.7 | 7.7 | 2.6 | 5.4 | -0.234 | -1.5 |
| 11/10/2017 9:10 PM | 3.9 | 3.9 | 8.1 | 2.6 | 4.7 | -0.245 | -1.5 |
| 11/10/2017 9:11 PM | 4.1 | 3.2 | 7.9 | 2.6 | 4.8 | -0.254 | -1.5 |
| 11/10/2017 9:12 PM | 4.2 | 3.1 | 7.6 | 2.7 | 5   | -0.241 | -1.5 |
| 11/10/2017 9:13 PM | 4   | 3.3 | 7.4 | 2.6 | 4.8 | -0.240 | -1.5 |
| 11/10/2017 9:14 PM | 3.7 | 3.4 | 7.3 | 2.6 | 4.8 | -0.248 | -1.5 |
| 11/10/2017 9:15 PM | 3.6 | 2.3 | 7.3 | 2.5 | 4.7 | -0.240 | -1.5 |
| 11/10/2017 9:16 PM | 3.5 | 2.2 | 7.4 | 2.5 | 4.9 | -0.239 | -1.5 |
| 11/10/2017 9:17 PM | 3.4 | 3.7 | 7.3 | 2.4 | 4.7 | -0.242 | -1.5 |
| 11/10/2017 9:18 PM | 3.4 | 1   | 7.4 | 2.4 | 4.8 | -0.253 | -1.5 |
| 11/10/2017 9:19 PM | 3.6 | 3.6 | 7.3 | 2.3 | 4.6 | -0.240 | -1.5 |
| 11/10/2017 9:20 PM | 3.6 | 2.6 | 7.4 | 2.3 | 4.4 | -0.228 | -1.5 |
| 11/10/2017 9:21 PM | 3.6 | 3.4 | 7.7 | 2.3 | 4.6 | -0.249 | -1.5 |
| 11/10/2017 9:22 PM | 3.7 | 3.3 | 7.8 | 2.2 | 4.4 | -0.239 | -1.5 |
| 11/10/2017 9:23 PM | 3.7 | 4.6 | 7.5 | 2.2 | 4.6 | -0.234 | -1.5 |
| 11/10/2017 9:24 PM | 3.8 | 2.7 | 7.7 | 2.2 | 4.6 | -0.244 | -1.5 |
| 11/10/2017 9:25 PM | 3.8 | 2.7 | 7.5 | 2.2 | 4.3 | -0.245 | -1.5 |
| 11/10/2017 9:26 PM | 3.9 | 2.7 | 7.8 | 2.2 | 4.8 | -0.242 | -1.5 |
| 11/10/2017 9:27 PM | 3.9 | 2.4 | 7.5 | 2.2 | 5   | -0.243 | -1.5 |
| 11/10/2017 9:28 PM | 3.9 | 3.3 | 7.5 | 2.2 | 5.3 | -0.251 | -1.5 |
| 11/10/2017 9:29 PM | 3.9 | 3   | 7.7 | 2.2 | 5.4 | -0.243 | -1.5 |
| 11/10/2017 9:30 PM | 3.9 | 3.4 | 7.6 | 2.3 | 5.4 | -0.233 | -1.5 |
| 11/10/2017 9:31 PM | 3.9 | 3.5 | 7.5 | 2.4 | 5.2 | -0.237 | -1.5 |
| 11/10/2017 9:32 PM | 3.9 | 3   | 7.8 | 2.5 | 5.2 | -0.242 | -1.5 |
| 11/10/2017 9:33 PM | 4   | 2.8 | 8.1 | 2.5 | 5.3 | -0.244 | -1.5 |
| 11/10/2017 9:34 PM | 4   | 3.2 | 7.9 | 2.6 | 5   | -0.233 | -1.5 |
| 11/10/2017 9:35 PM | 4   | 1.4 | 7.4 | 2.6 | 5   | -0.255 | -1.5 |
| 11/10/2017 9:36 PM | 3.9 | 1.7 | 7.3 | 2.6 | 4.7 | -0.244 | -1.5 |
| 11/10/2017 9:37 PM | 3.7 | 2.8 | 7.6 | 2.6 | 5.1 | -0.234 | -1.5 |
| 11/10/2017 9:38 PM | 3.7 | 4.8 | 7.7 | 2.6 | 4.8 | -0.253 | -1.5 |
| 11/10/2017 9:39 PM | 3.9 | 2.6 | 7.8 | 2.5 | 4.6 | -0.251 | -1.5 |
| 11/10/2017 9:40 PM | 4.1 | 2.9 | 7.7 | 2.5 | 4.6 | -0.242 | -1.5 |
| 11/10/2017 9:41 PM | 4.1 | 3.3 | 7.4 | 2.4 | 4.6 | -0.234 | -1.5 |
| 11/10/2017 9:42 PM | 4   | 2.7 | 7.8 | 2.4 | 4.4 | -0.251 | -1.5 |
| 11/10/2017 9:43 PM | 4   | 3.3 | 7.8 | 2.4 | 4.2 | -0.245 | -1.5 |
| 11/10/2017 9:44 PM | 4.1 | 3.8 | 7.7 | 2.3 | 4.6 | -0.235 | -1.5 |
| 11/10/2017 9:45 PM | 4.1 | 3.2 | 7.6 | 2.3 | 4.4 | -0.246 | -1.5 |
| 11/10/2017 9:46 PM | 4.1 | 2.9 | 7.9 | 2.3 | 4.4 | -0.248 | -1.5 |
| 11/10/2017 9:47 PM | 4.1 | 2.8 | 7.9 | 2.2 | 4.5 | -0.243 | -1.5 |
| 11/10/2017 9:48 PM | 4.2 | 3.7 | 7.8 | 2.2 | 4.5 | -0.242 | -1.5 |
| 11/10/2017 9:49 PM | 4.3 | 4.6 | 7.8 | 2.2 | 4.5 | -0.250 | -1.5 |
| 11/10/2017 9:50 PM | 4.3 | 4.3 | 7.8 | 2.2 | 4.4 | -0.247 | -1.5 |
| 11/10/2017 9:51 PM | 4.4 | 2.7 | 7.7 | 2.2 | 4.7 | -0.243 | -1.5 |
| 11/10/2017 9:52 PM | 4.3 | 1.9 | 7.6 | 2.2 | 4.3 | -0.241 | -1.5 |
| 11/10/2017 9:53 PM | 4.2 | 2.5 | 7.5 | 2.4 | 4.3 | -0.249 | -1.5 |

|                     |     |     |     |     |     |        |      |
|---------------------|-----|-----|-----|-----|-----|--------|------|
| 11/10/2017 9:54 PM  | 4.1 | 3   | 7.6 | 2.7 | 4.5 | -0.243 | -1.5 |
| 11/10/2017 9:55 PM  | 4.1 | 3.3 | 7.5 | 2.7 | 4.6 | -0.237 | -1.5 |
| 11/10/2017 9:56 PM  | 4   | 3.7 | 7.2 | 2.7 | 5.1 | -0.245 | -1.5 |
| 11/10/2017 9:57 PM  | 3.8 | 4   | 6.9 | 2.7 | 5.3 | -0.244 | -1.5 |
| 11/10/2017 9:58 PM  | 3.7 | 3.2 | 7.3 | 2.8 | 5   | -0.230 | -1.5 |
| 11/10/2017 9:59 PM  | 3.7 | 3.5 | 7.4 | 2.8 | 5.3 | -0.245 | -1.5 |
| 11/10/2017 10:00 PM | 3.7 | 3   | 7.1 | 2.9 | 5.5 | -0.251 | -1.5 |
| 11/10/2017 10:01 PM | 3.7 | 2.7 | 6.7 | 3   | 5.5 | -0.237 | -1.5 |
| 11/10/2017 10:02 PM | 3.5 | 0.9 | 7   | 3   | 5.9 | -0.234 | -1.5 |
| 11/10/2017 10:03 PM | 3.5 | 3   | 6.8 | 3.1 | 6   | -0.242 | -1.5 |
| 11/10/2017 10:04 PM | 3.4 | 2.7 | 6.8 | 3.1 | 5.8 | -0.246 | -1.5 |
| 11/10/2017 10:05 PM | 3.4 | 1.9 | 6.9 | 3.2 | 6   | -0.232 | -1.5 |
| 11/10/2017 10:06 PM | 3.4 | 1.3 | 6.9 | 3.2 | 5.7 | -0.239 | -1.5 |
| 11/10/2017 10:07 PM | 3.3 | 2.5 | 7.2 | 3.3 | 5.4 | -0.242 | -1.5 |
| 11/10/2017 10:08 PM | 3.3 | 3.6 | 7.2 | 3.2 | 5.2 | -0.250 | -1.5 |
| 11/10/2017 10:09 PM | 3.4 | 2.7 | 7.4 | 3.2 | 5.2 | -0.237 | -1.5 |
| 11/10/2017 10:10 PM | 3.5 | 3   | 7.2 | 3.2 | 5   | -0.237 | -1.5 |
| 11/10/2017 10:11 PM | 3.6 | 2.7 | 7.3 | 3.1 | 5   | -0.249 | -1.5 |
| 11/10/2017 10:12 PM | 3.7 | 2.5 | 7.4 | 3.1 | 4.9 | -0.244 | -1.5 |
| 11/10/2017 10:13 PM | 3.7 | 3.7 | 7.6 | 3.1 | 4.9 | -0.235 | -1.5 |
| 11/10/2017 10:14 PM | 3.7 | 2.2 | 7.2 | 3   | 4.7 | -0.250 | -1.5 |
| 11/10/2017 10:15 PM | 3.6 | 3.5 | 7.4 | 3   | 4.8 | -0.245 | -1.5 |
| 11/10/2017 10:16 PM | 3.5 | 1.8 | 7.2 | 3   | 4.9 | -0.236 | -1.5 |
| 11/10/2017 10:17 PM | 3.4 | 1.9 | 7   | 2.9 | 5.1 | -0.238 | -1.5 |
| 11/10/2017 10:18 PM | 3.4 | 2.7 | 7.1 | 2.9 | 5   | -0.244 | -1.5 |
| 11/10/2017 10:19 PM | 3.4 | 2.5 | 7   | 2.9 | 4.8 | -0.243 | -1.5 |
| 11/10/2017 10:20 PM | 3.3 | 1.2 | 6.9 | 2.8 | 5.3 | -0.237 | -1.5 |
| 11/10/2017 10:21 PM | 3.3 | 2.7 | 7.1 | 2.8 | 4.9 | -0.240 | -1.5 |
| 11/10/2017 10:22 PM | 3.3 | 2.7 | 7   | 2.8 | 5   | -0.242 | -1.5 |
| 11/10/2017 10:23 PM | 3.4 | 2.4 | 7.2 | 2.8 | 5.1 | -0.237 | -1.5 |
| 11/10/2017 10:24 PM | 3.4 | 2.3 | 7.3 | 2.8 | 4.9 | -0.239 | -1.5 |
| 11/10/2017 10:25 PM | 3.4 | 2.1 | 7.1 | 2.8 | 5   | -0.241 | -1.5 |
| 11/10/2017 10:26 PM | 3.5 | 0.7 | 7.2 | 2.8 | 5   | -0.239 | -1.5 |
| 11/10/2017 10:27 PM | 3.5 | 2.5 | 6.9 | 2.7 | 5.1 | -0.230 | -1.5 |
| 11/10/2017 10:28 PM | 3.5 | 1.9 | 7   | 2.8 | 5.1 | -0.230 | -1.5 |
| 11/10/2017 10:29 PM | 3.5 | 2.7 | 7   | 2.8 | 5.5 | -0.244 | -1.5 |
| 11/10/2017 10:30 PM | 3.4 | 1.3 | 7   | 2.8 | 5.7 | -0.236 | -1.5 |
| 11/10/2017 10:31 PM | 3.3 | 2.3 | 7.1 | 2.9 | 6   | -0.233 | -1.5 |
| 11/10/2017 10:32 PM | 3.2 | 1.4 | 6.8 | 3   | 6.1 | -0.245 | -1.5 |
| 11/10/2017 10:33 PM | 3.1 | 2   | 6.8 | 3.1 | 6.7 | -0.240 | -1.5 |
| 11/10/2017 10:34 PM | 3   | 2.1 | 6.5 | 3.2 | 6.6 | -0.235 | -1.5 |
| 11/10/2017 10:35 PM | 2.9 | 3.4 | 6.9 | 3.3 | 6.5 | -0.239 | -1.5 |
| 11/10/2017 10:36 PM | 2.9 | 2.4 | 6.9 | 3.4 | 6.4 | -0.244 | -1.5 |
| 11/10/2017 10:37 PM | 2.9 | 1.9 | 6.9 | 3.4 | 6.2 | -0.238 | -1.5 |
| 11/10/2017 10:38 PM | 3   | 1.4 | 6.7 | 3.5 | 6.1 | -0.234 | -1.5 |
| 11/10/2017 10:39 PM | 3   | 2.3 | 6.7 | 3.5 | 6   | -0.240 | -1.5 |
| 11/10/2017 10:40 PM | 3   | 2.5 | 6.9 | 3.5 | 5.8 | -0.244 | -1.5 |

|                     |     |     |     |     |     |        |      |
|---------------------|-----|-----|-----|-----|-----|--------|------|
| 11/10/2017 10:41 PM | 3   | 2.9 | 7.2 | 3.4 | 5.5 | -0.232 | -1.5 |
| 11/10/2017 10:42 PM | 3   | 1.1 | 6.8 | 3.4 | 5.5 | -0.241 | -1.5 |
| 11/10/2017 10:43 PM | 3.1 | 1.3 | 7   | 3.3 | 5.5 | -0.248 | -1.5 |
| 11/10/2017 10:44 PM | 3.1 | 2.6 | 7   | 3.3 | 5.4 | -0.237 | -1.5 |
| 11/10/2017 10:45 PM | 3.1 | 1   | 7   | 3.2 | 5.4 | -0.235 | -1.5 |
| 11/10/2017 10:46 PM | 3.2 | 1.2 | 7   | 3.1 | 5.2 | -0.240 | -1.5 |
| 11/10/2017 10:47 PM | 3.2 | 2.9 | 7.2 | 3.1 | 5.3 | -0.246 | -1.5 |
| 11/10/2017 10:48 PM | 3.3 | 3.4 | 7.3 | 3.1 | 5.2 | -0.230 | -1.5 |
| 11/10/2017 10:49 PM | 3.3 | 2.2 | 7.2 | 3   | 5.5 | -0.244 | -1.5 |
| 11/10/2017 10:50 PM | 3.3 | 2.8 | 7.4 | 3   | 5.3 | -0.245 | -1.5 |
| 11/10/2017 10:51 PM | 3.3 | 2.8 | 6.9 | 3   | 5   | -0.241 | -1.5 |
| 11/10/2017 10:52 PM | 3.4 | 3.7 | 7.2 | 2.9 | 5.1 | -0.235 | -1.5 |
| 11/10/2017 10:53 PM | 3.6 | 2.1 | 7.7 | 2.9 | 5   | -0.245 | -1.5 |
| 11/10/2017 10:54 PM | 3.8 | 2.3 | 7.7 | 2.9 | 4.7 | -0.244 | -1.5 |
| 11/10/2017 10:55 PM | 3.9 | 3.5 | 7.6 | 2.9 | 4.9 | -0.239 | -1.5 |
| 11/10/2017 10:56 PM | 3.9 | 2.4 | 7.9 | 2.9 | 4.8 | -0.240 | -1.5 |
| 11/10/2017 10:57 PM | 3.9 | 2.7 | 7.6 | 2.8 | 4.9 | -0.252 | -1.5 |
| 11/10/2017 10:58 PM | 3.8 | 2.6 | 7.8 | 2.8 | 4.6 | -0.246 | -1.5 |
| 11/10/2017 10:59 PM | 3.9 | 4.2 | 7.7 | 2.8 | 4.7 | -0.233 | -1.5 |
| 11/10/2017 11:00 PM | 3.9 | 3.3 | 7.3 | 2.8 | 4.8 | -0.244 | -1.5 |
| 11/10/2017 11:01 PM | 3.8 | 1.3 | 7.4 | 2.8 | 4.9 | -0.247 | -1.5 |
| 11/10/2017 11:02 PM | 3.8 | 2.3 | 7.3 | 2.9 | 5.3 | -0.235 | -1.5 |
| 11/10/2017 11:03 PM | 3.7 | 2.2 | 7.4 | 2.9 | 5.5 | -0.245 | -1.5 |
| 11/10/2017 11:04 PM | 3.8 | 2.8 | 7.2 | 3   | 5.7 | -0.247 | -1.5 |
| 11/10/2017 11:05 PM | 3.8 | 1.5 | 7.2 | 3.1 | 5.8 | -0.241 | -1.5 |
| 11/10/2017 11:06 PM | 3.8 | 2.8 | 7   | 3.2 | 6   | -0.238 | -1.5 |
| 11/10/2017 11:07 PM | 3.6 | 2.1 | 7   | 3.3 | 6.2 | -0.245 | -1.5 |
| 11/10/2017 11:08 PM | 3.6 | 2.1 | 7.2 | 3.4 | 5.4 | -0.252 | -1.5 |
| 11/10/2017 11:09 PM | 3.7 | 2.7 | 7.6 | 3.4 | 5.3 | -0.235 | -1.5 |
| 11/10/2017 11:10 PM | 3.8 | 2.1 | 7.8 | 3.4 | 5.1 | -0.237 | -1.5 |
| 11/10/2017 11:11 PM | 3.9 | 4.1 | 8   | 3.4 | 5.2 | -0.249 | -1.5 |
| 11/10/2017 11:12 PM | 4.1 | 2.7 | 7.4 | 3.4 | 4.8 | -0.247 | -1.5 |
| 11/10/2017 11:13 PM | 4.1 | 2.9 | 7.8 | 3.4 | 4.7 | -0.244 | -1.5 |
| 11/10/2017 11:14 PM | 4   | 2.8 | 7.3 | 3.3 | 4.9 | -0.244 | -1.5 |
| 11/10/2017 11:15 PM | 3.8 | 3.6 | 7.5 | 3.3 | 4.8 | -0.249 | -1.5 |
| 11/10/2017 11:16 PM | 3.7 | 3.1 | 7.2 | 3.2 | 4.8 | -0.243 | -1.5 |
| 11/10/2017 11:17 PM | 3.7 | 2.6 | 7.8 | 3.1 | 4.9 | -0.238 | -1.5 |
| 11/10/2017 11:18 PM | 3.9 | 1.6 | 8   | 3.1 | 4.6 | -0.243 | -1.5 |
| 11/10/2017 11:19 PM | 4.1 | 4.6 | 7.8 | 3   | 4.7 | -0.249 | -1.5 |
| 11/10/2017 11:20 PM | 4.2 | 4.5 | 8   | 3   | 4.6 | -0.238 | -1.5 |
| 11/10/2017 11:21 PM | 4.3 | 2.4 | 8   | 2.9 | 4.5 | -0.241 | -1.5 |
| 11/10/2017 11:22 PM | 4.3 | 3.3 | 8   | 2.9 | 4.2 | -0.249 | -1.5 |
| 11/10/2017 11:23 PM | 4.3 | 3.2 | 7.7 | 2.9 | 4.5 | -0.237 | -1.5 |
| 11/10/2017 11:24 PM | 4.3 | 1.8 | 7.7 | 2.9 | 4.4 | -0.238 | -1.5 |
| 11/10/2017 11:25 PM | 4.3 | 2.2 | 8.1 | 2.9 | 4.4 | -0.242 | -1.5 |
| 11/10/2017 11:26 PM | 4.4 | 3.6 | 7.3 | 2.8 | 4.3 | -0.250 | -1.5 |
| 11/10/2017 11:27 PM | 4.4 | 3.1 | 7.9 | 2.8 | 4.4 | -0.238 | -1.5 |

|                     |     |     |     |     |     |        |      |
|---------------------|-----|-----|-----|-----|-----|--------|------|
| 11/10/2017 11:28 PM | 4.4 | 4.1 | 8.3 | 2.8 | 4.8 | -0.244 | -1.5 |
| 11/10/2017 11:29 PM | 4.4 | 3.1 | 7.7 | 2.8 | 5.1 | -0.242 | -1.5 |
| 11/10/2017 11:30 PM | 4.3 | 3.3 | 7.4 | 2.9 | 5.5 | -0.236 | -1.5 |
| 11/10/2017 11:31 PM | 4.1 | 3.6 | 7.6 | 2.9 | 5.6 | -0.233 | -1.5 |
| 11/10/2017 11:32 PM | 4   | 3.9 | 7.5 | 3   | 5.9 | -0.245 | -1.5 |
| 11/10/2017 11:33 PM | 4   | 2.9 | 7.9 | 3.1 | 5.3 | -0.247 | -1.5 |
| 11/10/2017 11:34 PM | 4.2 | 4.1 | 7.5 | 3.2 | 5.8 | -0.236 | -1.5 |
| 11/10/2017 11:35 PM | 4.2 | 2.5 | 7.5 | 3.3 | 5.4 | -0.241 | -1.5 |
| 11/10/2017 11:36 PM | 4.2 | 2.8 | 7.9 | 3.3 | 4.9 | -0.245 | -1.5 |
| 11/10/2017 11:37 PM | 4.3 | 2.7 | 8   | 3.4 | 5.1 | -0.244 | -1.5 |
| 11/10/2017 11:38 PM | 4.6 | 3.8 | 8.5 | 3.4 | 4.5 | -0.240 | -1.5 |
| 11/10/2017 11:39 PM | 4.6 | 3.4 | 8.2 | 3.4 | 4.7 | -0.238 | -1.5 |
| 11/10/2017 11:40 PM | 4.6 | 4.9 | 7.5 | 3.3 | 4.3 | -0.248 | -1.5 |
| 11/10/2017 11:41 PM | 4.4 | 2.9 | 7.9 | 3.2 | 4.8 | -0.238 | -1.5 |
| 11/10/2017 11:42 PM | 4.3 | 3.9 | 8.1 | 3.2 | 4.6 | -0.236 | -1.5 |
| 11/10/2017 11:43 PM | 4.3 | 4   | 8.4 | 3.1 | 4.4 | -0.240 | -1.5 |
| 11/10/2017 11:44 PM | 4.5 | 3.5 | 8.6 | 3.1 | 4.1 | -0.248 | -1.5 |
| 11/10/2017 11:45 PM | 4.7 | 4.2 | 8.1 | 3   | 4.2 | -0.242 | -1.5 |
| 11/10/2017 11:46 PM | 4.8 | 3.9 | 8.4 | 3   | 4.4 | -0.238 | -1.5 |
| 11/10/2017 11:47 PM | 4.9 | 4.4 | 8.2 | 2.9 | 3.9 | -0.243 | -1.5 |
| 11/10/2017 11:48 PM | 4.9 | 4.3 | 8.7 | 2.9 | 3.9 | -0.244 | -1.5 |
| 11/10/2017 11:49 PM | 5   | 2.9 | 8.8 | 2.9 | 3.7 | -0.239 | -1.5 |
| 11/10/2017 11:50 PM | 5.1 | 5.4 | 9   | 2.8 | 3.7 | -0.239 | -1.5 |
| 11/10/2017 11:51 PM | 5.4 | 5   | 9   | 2.8 | 3.9 | -0.247 | -1.5 |
| 11/10/2017 11:52 PM | 5.5 | 5.1 | 8.9 | 2.8 | 3.9 | -0.244 | -1.5 |
| 11/10/2017 11:53 PM | 5.6 | 4.8 | 8.8 | 2.7 | 3.8 | -0.238 | -1.5 |
| 11/10/2017 11:54 PM | 5.5 | 3.9 | 9.1 | 2.7 | 3.7 | -0.237 | -1.5 |
| 11/10/2017 11:55 PM | 5.6 | 5.3 | 9   | 2.7 | 3.7 | -0.249 | -1.5 |
| 11/10/2017 11:56 PM | 5.7 | 4.5 | 8.9 | 2.6 | 3.8 | -0.239 | -1.5 |
| 11/10/2017 11:57 PM | 5.7 | 5.9 | 9.3 | 2.6 | 3.6 | -0.236 | -1.5 |
| 11/10/2017 11:58 PM | 5.8 | 5.9 | 9.4 | 2.6 | 3.5 | -0.243 | -1.5 |
| 11/10/2017 11:59 PM | 5.9 | 4.5 | 9.1 | 2.6 | 3.9 | -0.246 | -1.5 |
| 11/11/2017 12:00 AM | 5.9 | 4.2 | 8.5 | 2.6 | 4.3 | -0.236 | -1.5 |
| 11/11/2017 12:01 AM | 5.6 | 6.1 | 8.8 | 2.7 | 4.4 | -0.239 | -1.5 |
| 11/11/2017 12:02 AM | 5.5 | 4   | 8.6 | 2.8 | 4.5 | -0.253 | -1.5 |
| 11/11/2017 12:03 AM | 5.3 | 3.9 | 8.4 | 2.8 | 4.5 | -0.239 | -1.5 |
| 11/11/2017 12:04 AM | 5.3 | 3.4 | 8.2 | 2.9 | 4.7 | -0.238 | -1.5 |
| 11/11/2017 12:05 AM | 5.1 | 5.8 | 8.2 | 3   | 4.9 | -0.244 | -1.5 |
| 11/11/2017 12:06 AM | 5.1 | 3.7 | 8.4 | 3   | 4.9 | -0.247 | -1.5 |
| 11/11/2017 12:07 AM | 5   | 4.2 | 8.3 | 3.1 | 4.5 | -0.240 | -1.5 |
| 11/11/2017 12:08 AM | 5.2 | 3.3 | 8.7 | 3.1 | 4.2 | -0.237 | -1.5 |
| 11/11/2017 12:09 AM | 5.3 | 5.9 | 8.6 | 3.2 | 4.2 | -0.244 | -1.5 |
| 11/11/2017 12:10 AM | 5.6 | 3.4 | 9.1 | 3.1 | 3.8 | -0.240 | -1.5 |
| 11/11/2017 12:11 AM | 5.7 | 4.2 | 9   | 3.1 | 4.1 | -0.239 | -1.5 |
| 11/11/2017 12:12 AM | 5.8 | 3.8 | 8.6 | 3   | 3.9 | -0.241 | -1.5 |
| 11/11/2017 12:13 AM | 5.7 | 4.9 | 8.8 | 3   | 3.8 | -0.252 | -1.5 |
| 11/11/2017 12:14 AM | 5.7 | 5.5 | 8.8 | 2.9 | 4   | -0.243 | -1.5 |



|                     |     |     |     |     |     |        |      |
|---------------------|-----|-----|-----|-----|-----|--------|------|
| 11/11/2017 12:15 AM | 5.6 | 4.1 | 8.6 | 2.9 | 3.9 | -0.241 | -1.5 |
| 11/11/2017 12:16 AM | 5.6 | 4.9 | 8.6 | 2.8 | 3.8 | -0.245 | -1.5 |
| 11/11/2017 12:17 AM | 5.5 | 5   | 8.3 | 2.8 | 4   | -0.248 | -1.5 |
| 11/11/2017 12:18 AM | 5.5 | 4.6 | 8.6 | 2.7 | 3.8 | -0.237 | -1.5 |
| 11/11/2017 12:19 AM | 5.6 | 4.5 | 8.7 | 2.7 | 3.8 | -0.243 | -1.5 |
| 11/11/2017 12:20 AM | 5.7 | 5.3 | 8.8 | 2.7 | 3.9 | -0.249 | -1.5 |
| 11/11/2017 12:21 AM | 5.9 | 5.5 | 9.1 | 2.7 | 3.7 | -0.244 | -1.5 |
| 11/11/2017 12:22 AM | 6   | 6.3 | 9.2 | 2.6 | 3.9 | -0.235 | -1.5 |
| 11/11/2017 12:23 AM | 6.1 | 5.3 | 8.8 | 2.6 | 4   | -0.250 | -1.5 |
| 11/11/2017 12:24 AM | 6   | 4.9 | 8.6 | 2.6 | 3.8 | -0.249 | -1.5 |
| 11/11/2017 12:25 AM | 5.9 | 4.9 | 8.5 | 2.6 | 3.9 | -0.236 | -1.5 |
| 11/11/2017 12:26 AM | 5.7 | 4.4 | 8.9 | 2.6 | 3.8 | -0.238 | -1.5 |
| 11/11/2017 12:27 AM | 5.7 | 5.4 | 8.6 | 2.6 | 4.2 | -0.249 | -1.5 |
| 11/11/2017 12:28 AM | 5.7 | 6   | 8.8 | 2.6 | 4   | -0.241 | -1.5 |
| 11/11/2017 12:29 AM | 5.8 | 5.1 | 8.6 | 2.6 | 4.5 | -0.236 | -1.5 |
| 11/11/2017 12:30 AM | 5.9 | 4.8 | 8.6 | 2.6 | 4.3 | -0.233 | -1.5 |
| 11/11/2017 12:31 AM | 5.8 | 5.3 | 8.2 | 2.7 | 4.6 | -0.241 | -1.5 |
| 11/11/2017 12:32 AM | 5.5 | 3.4 | 7.7 | 2.8 | 4.7 | -0.237 | -1.5 |
| 11/11/2017 12:33 AM | 5.2 | 2.2 | 7.3 | 2.9 | 5   | -0.237 | -1.5 |
| 11/11/2017 12:34 AM | 5   | 2.9 | 7.8 | 2.9 | 5.1 | -0.245 | -1.5 |
| 11/11/2017 12:35 AM | 5   | 3.9 | 8.3 | 3   | 4.5 | -0.240 | -1.5 |
| 11/11/2017 12:36 AM | 5.2 | 5.9 | 8.1 | 3.1 | 4.5 | -0.233 | -1.5 |
| 11/11/2017 12:37 AM | 5.4 | 4.7 | 8.7 | 3.1 | 4.6 | -0.236 | -1.5 |
| 11/11/2017 12:38 AM | 5.5 | 3.8 | 8.3 | 3.1 | 4.3 | -0.244 | -1.5 |
| 11/11/2017 12:39 AM | 5.5 | 3.5 | 7.8 | 3.1 | 3.9 | -0.239 | -1.5 |
| 11/11/2017 12:40 AM | 5.4 | 3.6 | 7.8 | 3.1 | 4.2 | -0.236 | -1.5 |
| 11/11/2017 12:41 AM | 5.1 | 4.7 | 7.6 | 3   | 4.2 | -0.243 | -1.5 |
| 11/11/2017 12:42 AM | 5   | 3.7 | 7.7 | 3   | 4.2 | -0.242 | -1.5 |
| 11/11/2017 12:43 AM | 4.9 | 2.3 | 7.8 | 2.9 | 4.4 | -0.232 | -1.5 |
| 11/11/2017 12:44 AM | 4.8 | 4.1 | 7.5 | 2.9 | 3.9 | -0.234 | -1.5 |
| 11/11/2017 12:45 AM | 4.9 | 5.2 | 7.7 | 2.8 | 4.3 | -0.244 | -1.5 |
| 11/11/2017 12:46 AM | 4.8 | 3.7 | 7.5 | 2.8 | 4.5 | -0.246 | -1.5 |
| 11/11/2017 12:47 AM | 4.8 | 3.1 | 7.6 | 2.8 | 4.4 | -0.233 | -1.5 |
| 11/11/2017 12:48 AM | 4.5 | 2.7 | 7   | 2.8 | 4.5 | -0.237 | -1.5 |
| 11/11/2017 12:49 AM | 4.2 | 2.8 | 6.6 | 2.7 | 4.6 | -0.243 | -1.5 |
| 11/11/2017 12:50 AM | 4   | 4.9 | 7   | 2.7 | 4.5 | -0.233 | -1.5 |
| 11/11/2017 12:51 AM | 3.9 | 2.7 | 6.8 | 2.7 | 4.6 | -0.230 | -1.5 |
| 11/11/2017 12:52 AM | 3.9 | 2.1 | 6.7 | 2.7 | 4.7 | -0.242 | -1.5 |
| 11/11/2017 12:53 AM | 3.7 | 3   | 6.5 | 2.7 | 4.9 | -0.246 | -1.5 |
| 11/11/2017 12:54 AM | 3.6 | 2.4 | 6.3 | 2.7 | 4.8 | -0.231 | -1.5 |
| 11/11/2017 12:55 AM | 3.4 | 3.8 | 6.4 | 2.7 | 5   | -0.229 | -1.5 |
| 11/11/2017 12:56 AM | 3.4 | 0   | 6.5 | 2.7 | 5.3 | -0.244 | -1.5 |
| 11/11/2017 12:57 AM | 3.2 | 2.5 | 5.9 | 2.7 | 5.5 | -0.235 | -1.5 |
| 11/11/2017 12:58 AM | 3   | 2.1 | 5.7 | 2.8 | 5.8 | -0.230 | -1.5 |
| 11/11/2017 12:59 AM | 2.7 | 1.5 | 5.4 | 2.8 | 6.2 | -0.241 | -1.5 |
| 11/11/2017 1:00 AM  | 2.4 | 0.7 | 5.1 | 2.9 | 7   | -0.237 | -1.5 |
| 11/11/2017 1:01 AM  | 2.3 | 0.4 | 5.3 | 3   | 7.7 | -0.229 | -1.5 |

|                    |     |      |     |     |     |        |      |
|--------------------|-----|------|-----|-----|-----|--------|------|
| 11/11/2017 1:02 AM | 2.2 | 1    | 5.5 | 3.2 | 7.4 | -0.240 | -1.5 |
| 11/11/2017 1:03 AM | 2.2 | 2.8  | 5.4 | 3.4 | 7.4 | -0.237 | -1.5 |
| 11/11/2017 1:04 AM | 2.2 | 0.7  | 5.5 | 3.5 | 7   | -0.238 | -1.5 |
| 11/11/2017 1:05 AM | 2.2 | 0.9  | 5.3 | 3.6 | 7.1 | -0.231 | -1.5 |
| 11/11/2017 1:06 AM | 2.3 | 1.2  | 5.8 | 3.6 | 6.9 | -0.238 | -1.5 |
| 11/11/2017 1:07 AM | 2.4 | 1.6  | 5.8 | 3.6 | 6.8 | -0.238 | -1.5 |
| 11/11/2017 1:08 AM | 2.4 | 0.9  | 5.5 | 3.6 | 6.6 | -0.229 | -1.5 |
| 11/11/2017 1:09 AM | 2.3 | 1.2  | 5.2 | 3.6 | 6.5 | -0.228 | -1.5 |
| 11/11/2017 1:10 AM | 2.3 | -0.8 | 5.6 | 3.5 | 6.4 | -0.244 | -1.5 |
| 11/11/2017 1:11 AM | 2.3 | 0.5  | 5.5 | 3.4 | 6.7 | -0.243 | -1.5 |
| 11/11/2017 1:12 AM | 2.4 | 0.7  | 5.4 | 3.3 | 6.4 | -0.233 | -1.5 |
| 11/11/2017 1:13 AM | 2.3 | 1.2  | 5.3 | 3.3 | 6.6 | -0.232 | -1.5 |
| 11/11/2017 1:14 AM | 2.2 | 0.9  | 5.4 | 3.2 | 6.5 | -0.243 | -1.5 |
| 11/11/2017 1:15 AM | 2.1 | 0.2  | 5.2 | 3.2 | 6.8 | -0.234 | -1.5 |
| 11/11/2017 1:16 AM | 2   | 0.7  | 5.3 | 3.1 | 6.4 | -0.231 | -1.5 |
| 11/11/2017 1:17 AM | 2   | -0.2 | 5.5 | 3.1 | 6.3 | -0.240 | -1.5 |
| 11/11/2017 1:18 AM | 2.1 | 1.8  | 5.5 | 3   | 6.5 | -0.238 | -1.5 |
| 11/11/2017 1:19 AM | 2.1 | 2.1  | 5.4 | 3   | 6.7 | -0.229 | -1.5 |
| 11/11/2017 1:20 AM | 2.1 | 0.6  | 5.3 | 2.9 | 6.4 | -0.242 | -1.5 |
| 11/11/2017 1:21 AM | 2   | -0.1 | 5.4 | 2.9 | 6.4 | -0.251 | -1.5 |
| 11/11/2017 1:22 AM | 1.9 | 0    | 5.3 | 2.9 | 6.7 | -0.238 | -1.5 |
| 11/11/2017 1:23 AM | 1.9 | 0.9  | 5.4 | 2.9 | 6.6 | -0.230 | -1.5 |
| 11/11/2017 1:24 AM | 2   | 1.4  | 5.3 | 2.9 | 6.5 | -0.246 | -1.5 |
| 11/11/2017 1:25 AM | 2.1 | 2.1  | 5.6 | 2.8 | 6.4 | -0.244 | -1.5 |
| 11/11/2017 1:26 AM | 2.1 | 0.3  | 5.5 | 2.8 | 6.5 | -0.235 | -1.5 |
| 11/11/2017 1:27 AM | 2.1 | 0.6  | 5.5 | 2.8 | 6.4 | -0.238 | -1.5 |
| 11/11/2017 1:28 AM | 2   | 0.5  | 5.3 | 2.8 | 6.4 | -0.240 | -1.5 |
| 11/11/2017 1:29 AM | 2   | -0.1 | 5.5 | 2.8 | 6.7 | -0.241 | -1.5 |
| 11/11/2017 1:30 AM | 2   | 1    | 5.6 | 2.7 | 6.2 | -0.236 | -1.5 |
| 11/11/2017 1:31 AM | 2   | 2    | 5.4 | 2.7 | 6.3 | -0.245 | -1.5 |
| 11/11/2017 1:32 AM | 2   | 0.9  | 5.7 | 2.7 | 6.3 | -0.243 | -1.5 |
| 11/11/2017 1:33 AM | 2   | 0.6  | 5.3 | 2.7 | 6.5 | -0.243 | -1.5 |
| 11/11/2017 1:34 AM | 2   | 1.2  | 5.7 | 2.6 | 6.4 | -0.243 | -1.5 |
| 11/11/2017 1:35 AM | 2   | 0.5  | 5.3 | 2.6 | 6.2 | -0.255 | -1.5 |
| 11/11/2017 1:36 AM | 1.9 | 0.9  | 5.3 | 2.5 | 6.3 | -0.240 | -1.5 |
| 11/11/2017 1:37 AM | 1.9 | 0.7  | 5.4 | 2.5 | 5.9 | -0.239 | -1.5 |
| 11/11/2017 1:38 AM | 1.8 | 0.5  | 5.2 | 2.5 | 6   | -0.250 | -1.5 |
| 11/11/2017 1:39 AM | 1.8 | 1.1  | 5.4 | 2.4 | 6.3 | -0.252 | -1.5 |
| 11/11/2017 1:40 AM | 1.8 | 0.6  | 5.5 | 2.4 | 6.6 | -0.240 | -1.5 |
| 11/11/2017 1:41 AM | 1.7 | 0.3  | 5.3 | 2.4 | 6.8 | -0.241 | -1.5 |
| 11/11/2017 1:42 AM | 1.6 | 0.3  | 5.3 | 2.3 | 6.5 | -0.251 | -1.5 |
| 11/11/2017 1:43 AM | 1.5 | -0.1 | 5.3 | 2.3 | 6.5 | -0.237 | -1.5 |
| 11/11/2017 1:44 AM | 1.5 | -0.7 | 5.3 | 2.2 | 6.5 | -0.243 | -1.5 |
| 11/11/2017 1:45 AM | 1.5 | 0.7  | 5.4 | 2.2 | 6.5 | -0.251 | -1.5 |
| 11/11/2017 1:46 AM | 1.7 | 0.6  | 5.7 | 2.2 | 6.7 | -0.248 | -1.5 |
| 11/11/2017 1:47 AM | 1.7 | 0.8  | 5.4 | 2.2 | 6.6 | -0.233 | -1.5 |
| 11/11/2017 1:48 AM | 1.8 | 1.3  | 5.6 | 2.2 | 6.6 | -0.248 | -1.5 |

|                    |     |      |     |     |     |        |      |
|--------------------|-----|------|-----|-----|-----|--------|------|
| 11/11/2017 1:49 AM | 1.8 | 0.7  | 5.7 | 2.2 | 6.5 | -0.249 | -1.5 |
| 11/11/2017 1:50 AM | 1.8 | 0.5  | 5.7 | 2.2 | 6.5 | -0.246 | -1.5 |
| 11/11/2017 1:51 AM | 1.9 | 1.2  | 5.7 | 2.2 | 6.6 | -0.246 | -1.5 |
| 11/11/2017 1:52 AM | 1.8 | 1.8  | 5.5 | 2.3 | 6.7 | -0.253 | -1.5 |
| 11/11/2017 1:53 AM | 1.8 | 1.2  | 5.5 | 2.3 | 6.2 | -0.252 | -1.5 |
| 11/11/2017 1:54 AM | 1.7 | -0.6 | 5.4 | 2.3 | 6.2 | -0.241 | -1.5 |
| 11/11/2017 1:55 AM | 1.7 | 0.3  | 5.2 | 2.3 | 6.5 | -0.256 | -1.5 |
| 11/11/2017 1:56 AM | 1.7 | 0.1  | 5.1 | 2.3 | 6.3 | -0.253 | -1.5 |
| 11/11/2017 1:57 AM | 1.6 | -0.3 | 5.2 | 2.3 | 6.8 | -0.251 | -1.5 |
| 11/11/2017 1:58 AM | 1.5 | 0.7  | 5.1 | 2.4 | 6.7 | -0.250 | -1.5 |
| 11/11/2017 1:59 AM | 1.4 | -0.4 | 5   | 2.4 | 6.7 | -0.255 | -1.5 |
| 11/11/2017 2:00 AM | 1.3 | 0.2  | 5.3 | 2.4 | 6.8 | -0.252 | -1.5 |
| 11/11/2017 2:01 AM | 1.3 | -0.4 | 5.4 | 2.4 | 6.6 | -0.246 | -1.5 |
| 11/11/2017 2:02 AM | 1.3 | 0.6  | 5.2 | 2.4 | 7   | -0.254 | -1.5 |
| 11/11/2017 2:03 AM | 1.2 | 1.3  | 5.2 | 2.4 | 7.3 | -0.252 | -1.5 |
| 11/11/2017 2:04 AM | 1.2 | 1.2  | 5.3 | 2.3 | 6.9 | -0.247 | -1.5 |
| 11/11/2017 2:05 AM | 1.1 | 0.9  | 5.3 | 2.3 | 6.6 | -0.251 | -1.5 |
| 11/11/2017 2:06 AM | 1.1 | -1.7 | 5.1 | 2.4 | 6.9 | -0.258 | -1.5 |
| 11/11/2017 2:07 AM | 1.2 | 1.8  | 5.5 | 2.4 | 6.8 | -0.249 | -1.5 |
| 11/11/2017 2:08 AM | 1.4 | 0.9  | 5.8 | 2.4 | 6.9 | -0.247 | -1.5 |
| 11/11/2017 2:09 AM | 1.6 | 1.4  | 6   | 2.4 | 6.5 | -0.255 | -1.5 |
| 11/11/2017 2:10 AM | 2   | 1.3  | 6.3 | 2.4 | 6.5 | -0.255 | -1.5 |
| 11/11/2017 2:11 AM | 2.2 | 1.7  | 6.2 | 2.4 | 6.3 | -0.241 | -1.5 |
| 11/11/2017 2:12 AM | 2.3 | 1.2  | 6.2 | 2.4 | 5.9 | -0.256 | -1.5 |
| 11/11/2017 2:13 AM | 2.4 | 1.4  | 6.1 | 2.5 | 5.9 | -0.255 | -1.5 |
| 11/11/2017 2:14 AM | 2.4 | 2.4  | 6.1 | 2.5 | 5.9 | -0.255 | -1.5 |
| 11/11/2017 2:15 AM | 2.3 | 0.7  | 6   | 2.5 | 5.8 | -0.251 | -1.5 |
| 11/11/2017 2:16 AM | 2.2 | 1.8  | 5.8 | 2.5 | 5.7 | -0.257 | -1.5 |
| 11/11/2017 2:17 AM | 2   | 2.8  | 6   | 2.5 | 5.9 | -0.256 | -1.5 |
| 11/11/2017 2:18 AM | 2   | 0    | 5.8 | 2.5 | 5.9 | -0.252 | -1.5 |
| 11/11/2017 2:19 AM | 2.1 | 1.9  | 6   | 2.5 | 5.8 | -0.261 | -1.5 |
| 11/11/2017 2:20 AM | 2.2 | 1.1  | 6.2 | 2.5 | 5.8 | -0.266 | -1.5 |
| 11/11/2017 2:21 AM | 2.3 | 1.2  | 5.8 | 2.5 | 5.6 | -0.251 | -1.5 |
| 11/11/2017 2:22 AM | 2.3 | 1.1  | 6   | 2.4 | 5.4 | -0.256 | -1.5 |
| 11/11/2017 2:23 AM | 2.2 | 1.3  | 5.8 | 2.5 | 6   | -0.265 | -1.5 |
| 11/11/2017 2:24 AM | 2.2 | 1.4  | 5.8 | 2.5 | 5.9 | -0.250 | -1.5 |
| 11/11/2017 2:25 AM | 2.1 | -1.3 | 5.8 | 2.5 | 5.8 | -0.251 | -1.5 |
| 11/11/2017 2:26 AM | 2   | 0.9  | 5.6 | 2.5 | 5.8 | -0.258 | -1.5 |
| 11/11/2017 2:27 AM | 2   | -0.4 | 5.6 | 2.5 | 6   | -0.259 | -1.5 |
| 11/11/2017 2:28 AM | 2   | 0.2  | 5.7 | 2.5 | 6   | -0.252 | -1.5 |
| 11/11/2017 2:29 AM | 1.9 | 2.3  | 5.7 | 2.5 | 6.4 | -0.258 | -1.5 |
| 11/11/2017 2:30 AM | 1.8 | 0.3  | 5.5 | 2.5 | 6.5 | -0.260 | -1.5 |
| 11/11/2017 2:31 AM | 1.8 | 0.2  | 5.5 | 2.6 | 6.7 | -0.246 | -1.5 |
| 11/11/2017 2:32 AM | 1.7 | 1.4  | 5.5 | 2.6 | 6.7 | -0.251 | -1.5 |
| 11/11/2017 2:33 AM | 1.7 | -0.9 | 5.7 | 2.6 | 6.7 | -0.257 | -1.5 |
| 11/11/2017 2:34 AM | 1.6 | 0.9  | 5.5 | 2.6 | 6.5 | -0.248 | -1.5 |
| 11/11/2017 2:35 AM | 1.6 | 0.1  | 5.5 | 2.6 | 6.7 | -0.248 | -1.5 |

|                    |     |      |     |     |     |        |      |
|--------------------|-----|------|-----|-----|-----|--------|------|
| 11/11/2017 2:36 AM | 1.6 | 0.3  | 5.6 | 2.6 | 6.6 | -0.256 | -1.5 |
| 11/11/2017 2:37 AM | 1.5 | 0.4  | 5.3 | 2.6 | 6.7 | -0.254 | -1.5 |
| 11/11/2017 2:38 AM | 1.5 | -0.2 | 5.4 | 2.6 | 6.8 | -0.246 | -1.5 |
| 11/11/2017 2:39 AM | 1.4 | 0.3  | 5.4 | 2.6 | 7.3 | -0.249 | -1.5 |
| 11/11/2017 2:40 AM | 1.4 | 0.8  | 5.2 | 2.7 | 7.4 | -0.262 | -1.5 |
| 11/11/2017 2:41 AM | 1.3 | 0    | 4.9 | 2.7 | 7.2 | -0.251 | -1.5 |
| 11/11/2017 2:42 AM | 1.3 | 0.1  | 5.3 | 2.8 | 7.3 | -0.248 | -1.5 |
| 11/11/2017 2:43 AM | 1.3 | -0.3 | 5.2 | 2.9 | 7.4 | -0.255 | -1.5 |
| 11/11/2017 2:44 AM | 1.3 | 0.5  | 5.1 | 2.9 | 7.3 | -0.259 | -1.5 |
| 11/11/2017 2:45 AM | 1.4 | 0.4  | 5.5 | 2.9 | 7.1 | -0.246 | -1.5 |
| 11/11/2017 2:46 AM | 1.5 | 1.4  | 5.8 | 2.9 | 7.2 | -0.251 | -1.5 |
| 11/11/2017 2:47 AM | 1.7 | 0.8  | 5.8 | 2.9 | 6.8 | -0.257 | -1.5 |
| 11/11/2017 2:48 AM | 1.8 | 1.2  | 5.4 | 2.9 | 7.2 | -0.251 | -1.5 |
| 11/11/2017 2:49 AM | 1.8 | -0.9 | 5.8 | 2.9 | 7.1 | -0.248 | -1.5 |
| 11/11/2017 2:50 AM | 1.8 | -0.3 | 5.4 | 2.9 | 7.2 | -0.254 | -1.5 |
| 11/11/2017 2:51 AM | 1.7 | 0    | 5.2 | 2.8 | 7.1 | -0.257 | -1.5 |
| 11/11/2017 2:52 AM | 1.6 | 0.5  | 5.5 | 2.8 | 7.1 | -0.247 | -1.5 |
| 11/11/2017 2:53 AM | 1.5 | 0.3  | 5.2 | 2.9 | 7.1 | -0.258 | -1.5 |
| 11/11/2017 2:54 AM | 1.4 | -0.1 | 5.4 | 2.8 | 7.4 | -0.260 | -1.5 |
| 11/11/2017 2:55 AM | 1.4 | 0.9  | 5.6 | 2.8 | 7.3 | -0.244 | -1.5 |
| 11/11/2017 2:56 AM | 1.5 | 0.7  | 5.4 | 2.7 | 7.2 | -0.252 | -1.5 |
| 11/11/2017 2:57 AM | 1.5 | 1    | 5.5 | 2.7 | 7.1 | -0.269 | -1.5 |
| 11/11/2017 2:58 AM | 1.4 | 0    | 5.3 | 2.7 | 7.2 | -0.265 | -1.5 |
| 11/11/2017 2:59 AM | 1.4 | 1.9  | 5.6 | 2.6 | 7.1 | -0.258 | -1.5 |
| 11/11/2017 3:00 AM | 1.5 | 0.4  | 5.7 | 2.6 | 7   | -0.259 | -1.5 |
| 11/11/2017 3:01 AM | 1.6 | 0.9  | 5.7 | 2.6 | 6.6 | -0.266 | -1.5 |
| 11/11/2017 3:02 AM | 1.6 | 1    | 5.6 | 2.5 | 7.1 | -0.259 | -1.5 |
| 11/11/2017 3:03 AM | 1.7 | 1.6  | 5.8 | 2.5 | 6.7 | -0.248 | -1.5 |
| 11/11/2017 3:04 AM | 1.7 | -0.1 | 5.4 | 2.5 | 6.8 | -0.262 | -1.5 |
| 11/11/2017 3:05 AM | 1.6 | 0.8  | 5.5 | 2.5 | 6.7 | -0.259 | -1.5 |
| 11/11/2017 3:06 AM | 1.6 | 0    | 5.7 | 2.5 | 6.7 | -0.261 | -1.5 |
| 11/11/2017 3:07 AM | 1.6 | -0.3 | 5.8 | 2.5 | 6.9 | -0.258 | -1.5 |
| 11/11/2017 3:08 AM | 1.7 | 1    | 6   | 2.5 | 6.5 | -0.265 | -1.5 |
| 11/11/2017 3:09 AM | 1.8 | 0.5  | 6.1 | 2.4 | 6.7 | -0.257 | -1.5 |
| 11/11/2017 3:10 AM | 1.9 | 1.6  | 5.9 | 2.4 | 6.5 | -0.255 | -1.5 |
| 11/11/2017 3:11 AM | 2   | 1.9  | 5.7 | 2.4 | 6.3 | -0.266 | -1.5 |
| 11/11/2017 3:12 AM | 2   | 0.2  | 6.1 | 2.4 | 6   | -0.269 | -1.5 |
| 11/11/2017 3:13 AM | 1.9 | 1.8  | 5.9 | 2.4 | 6.1 | -0.259 | -1.5 |
| 11/11/2017 3:14 AM | 1.9 | 0.8  | 5.8 | 2.4 | 6.1 | -0.262 | -1.5 |
| 11/11/2017 3:15 AM | 1.9 | -1.4 | 5.9 | 2.3 | 6.2 | -0.267 | -1.5 |
| 11/11/2017 3:16 AM | 1.8 | 1.9  | 5.7 | 2.3 | 6.1 | -0.260 | -1.5 |
| 11/11/2017 3:17 AM | 1.7 | 0.1  | 5.7 | 2.3 | 6   | -0.254 | -1.5 |
| 11/11/2017 3:18 AM | 1.7 | 2.4  | 5.7 | 2.3 | 5.9 | -0.271 | -1.5 |
| 11/11/2017 3:19 AM | 1.8 | 1    | 5.9 | 2.3 | 6.1 | -0.265 | -1.5 |
| 11/11/2017 3:20 AM | 1.9 | 0.1  | 5.9 | 2.3 | 5.9 | -0.260 | -1.5 |
| 11/11/2017 3:21 AM | 1.9 | 0.6  | 6.2 | 2.3 | 5.9 | -0.259 | -1.5 |
| 11/11/2017 3:22 AM | 1.9 | 0.3  | 6.1 | 2.3 | 5.8 | -0.270 | -1.5 |

|                    |     |      |     |     |     |        |      |
|--------------------|-----|------|-----|-----|-----|--------|------|
| 11/11/2017 3:23 AM | 1.9 | 1.1  | 6.1 | 2.3 | 6.1 | -0.262 | -1.5 |
| 11/11/2017 3:24 AM | 1.8 | -0.7 | 5.9 | 2.3 | 5.7 | -0.263 | -1.5 |
| 11/11/2017 3:25 AM | 1.8 | 1.7  | 5.8 | 2.3 | 6   | -0.267 | -1.5 |
| 11/11/2017 3:26 AM | 1.7 | 0.6  | 6.2 | 2.3 | 5.8 | -0.264 | -1.5 |
| 11/11/2017 3:27 AM | 1.8 | 0.1  | 6.1 | 2.2 | 5.6 | -0.257 | -1.5 |
| 11/11/2017 3:28 AM | 1.8 | 0.1  | 6.3 | 2.2 | 5.7 | -0.261 | -1.5 |
| 11/11/2017 3:29 AM | 1.9 | -0.1 | 6   | 2.2 | 5.9 | -0.267 | -1.5 |
| 11/11/2017 3:30 AM | 1.9 | 0.7  | 6   | 2.2 | 5.7 | -0.263 | -1.5 |
| 11/11/2017 3:31 AM | 1.9 | 1.6  | 5.8 | 2.2 | 5.8 | -0.260 | -1.5 |
| 11/11/2017 3:32 AM | 1.8 | 1.8  | 6   | 2.2 | 5.7 | -0.268 | -1.5 |
| 11/11/2017 3:33 AM | 1.7 | 0.1  | 5.9 | 2.2 | 5.9 | -0.271 | -1.5 |
| 11/11/2017 3:34 AM | 1.7 | 0.3  | 6.2 | 2.2 | 6.1 | -0.257 | -1.5 |
| 11/11/2017 3:35 AM | 1.7 | 1.3  | 5.8 | 2.2 | 6.1 | -0.268 | -1.5 |
| 11/11/2017 3:36 AM | 1.6 | 0.4  | 5.9 | 2.2 | 6.2 | -0.263 | -1.5 |
| 11/11/2017 3:37 AM | 1.6 | -0.5 | 6   | 2.2 | 6.4 | -0.258 | -1.5 |
| 11/11/2017 3:38 AM | 1.6 | 1.3  | 6.1 | 2.2 | 6.4 | -0.263 | -1.5 |
| 11/11/2017 3:39 AM | 1.7 | -0.4 | 6   | 2.2 | 6.3 | -0.268 | -1.5 |
| 11/11/2017 3:40 AM | 1.7 | 0.5  | 6.2 | 2.2 | 7.2 | -0.255 | -1.5 |
| 11/11/2017 3:41 AM | 1.7 | 0.5  | 6   | 2.3 | 7.3 | -0.261 | -1.5 |
| 11/11/2017 3:42 AM | 1.9 | 2    | 6.7 | 2.5 | 7.4 | -0.264 | -1.5 |
| 11/11/2017 3:43 AM | 2.2 | 3.7  | 6.9 | 2.6 | 7.6 | -0.257 | -1.5 |
| 11/11/2017 3:44 AM | 2.5 | 1.8  | 6.7 | 2.7 | 7.1 | -0.261 | -1.5 |
| 11/11/2017 3:45 AM | 2.6 | 1.3  | 6.7 | 2.9 | 6.7 | -0.254 | -1.5 |
| 11/11/2017 3:46 AM | 2.7 | 1.1  | 7.2 | 3   | 6.4 | -0.261 | -1.5 |
| 11/11/2017 3:47 AM | 3   | 2.3  | 7.2 | 3.1 | 6.5 | -0.253 | -1.5 |
| 11/11/2017 3:48 AM | 3.2 | 3    | 7.2 | 3.1 | 5.8 | -0.254 | -1.5 |
| 11/11/2017 3:49 AM | 3.5 | 1.5  | 8.1 | 3.1 | 5.4 | -0.260 | -1.5 |
| 11/11/2017 3:50 AM | 3.8 | 2.5  | 7.9 | 3.1 | 5   | -0.267 | -1.5 |
| 11/11/2017 3:51 AM | 4   | 6    | 8.2 | 3.1 | 4.9 | -0.250 | -1.5 |
| 11/11/2017 3:52 AM | 4.3 | 3.4  | 8.2 | 3.1 | 4.8 | -0.257 | -1.5 |
| 11/11/2017 3:53 AM | 4.3 | 4.4  | 8   | 3   | 4.7 | -0.261 | -1.5 |
| 11/11/2017 3:54 AM | 4.3 | 4.8  | 7.6 | 3   | 4.6 | -0.251 | -1.5 |
| 11/11/2017 3:55 AM | 4.3 | 4.2  | 8.4 | 3   | 4.5 | -0.255 | -1.5 |
| 11/11/2017 3:56 AM | 4.4 | 3.7  | 8.3 | 2.9 | 4.5 | -0.256 | -1.5 |
| 11/11/2017 3:57 AM | 4.6 | 4.3  | 8.7 | 2.9 | 4.5 | -0.263 | -1.5 |
| 11/11/2017 3:58 AM | 4.7 | 4.5  | 8.3 | 2.8 | 4.3 | -0.255 | -1.5 |
| 11/11/2017 3:59 AM | 4.7 | 4.1  | 8.5 | 2.8 | 4.2 | -0.262 | -1.5 |
| 11/11/2017 4:00 AM | 4.6 | 2.6  | 8   | 2.8 | 4.1 | -0.268 | -1.5 |
| 11/11/2017 4:01 AM | 4.6 | 2.5  | 8.3 | 2.8 | 4.1 | -0.255 | -1.5 |
| 11/11/2017 4:02 AM | 4.6 | 2.9  | 7.9 | 2.8 | 4.2 | -0.254 | -1.5 |
| 11/11/2017 4:03 AM | 4.4 | 3.9  | 7.6 | 2.8 | 4.2 | -0.265 | -1.5 |
| 11/11/2017 4:04 AM | 4.2 | 1.6  | 7.5 | 2.7 | 4.2 | -0.258 | -1.5 |
| 11/11/2017 4:05 AM | 4   | 3.2  | 7.4 | 2.7 | 4.3 | -0.255 | -1.5 |
| 11/11/2017 4:06 AM | 3.9 | 4    | 7.4 | 2.7 | 4.5 | -0.261 | -1.5 |
| 11/11/2017 4:07 AM | 3.8 | 2.2  | 7.4 | 2.7 | 4.1 | -0.257 | -1.5 |
| 11/11/2017 4:08 AM | 3.9 | 4    | 8   | 2.6 | 4.1 | -0.246 | -1.5 |
| 11/11/2017 4:09 AM | 4.1 | 2.6  | 7.5 | 2.6 | 4.3 | -0.264 | -1.5 |

|                    |     |     |      |     |     |        |      |
|--------------------|-----|-----|------|-----|-----|--------|------|
| 11/11/2017 4:10 AM | 4.2 | 2.7 | 7.7  | 2.6 | 4.1 | -0.263 | -1.5 |
| 11/11/2017 4:11 AM | 4.1 | 3.3 | 7.7  | 2.6 | 4.3 | -0.256 | -1.5 |
| 11/11/2017 4:12 AM | 4.1 | 2.1 | 7.5  | 2.6 | 4.5 | -0.255 | -1.5 |
| 11/11/2017 4:13 AM | 4.1 | 2.6 | 7.4  | 2.6 | 4.6 | -0.262 | -1.5 |
| 11/11/2017 4:14 AM | 4.1 | 5.4 | 7.8  | 2.6 | 4.8 | -0.261 | -1.5 |
| 11/11/2017 4:15 AM | 4.2 | 3.1 | 7.9  | 2.7 | 5.2 | -0.258 | -1.5 |
| 11/11/2017 4:16 AM | 4.4 | 1.5 | 7.8  | 2.8 | 5.2 | -0.258 | -1.5 |
| 11/11/2017 4:17 AM | 4.3 | 0.8 | 7.3  | 2.8 | 5.4 | -0.265 | -1.5 |
| 11/11/2017 4:18 AM | 4.1 | 2.4 | 7.5  | 2.9 | 5.5 | -0.254 | -1.5 |
| 11/11/2017 4:19 AM | 3.9 | 3.6 | 7.3  | 3   | 5.5 | -0.259 | -1.5 |
| 11/11/2017 4:20 AM | 3.9 | 3.4 | 7.6  | 3.2 | 5.3 | -0.270 | -1.5 |
| 11/11/2017 4:21 AM | 4   | 3   | 8    | 3.2 | 5.3 | -0.257 | -1.5 |
| 11/11/2017 4:22 AM | 4.2 | 5.2 | 8    | 3.3 | 5   | -0.260 | -1.5 |
| 11/11/2017 4:23 AM | 4.5 | 4.4 | 8.1  | 3.3 | 4.5 | -0.268 | -1.5 |
| 11/11/2017 4:24 AM | 4.7 | 4.4 | 8.6  | 3.3 | 4.6 | -0.260 | -1.5 |
| 11/11/2017 4:25 AM | 4.9 | 5   | 8.3  | 3.2 | 4.4 | -0.256 | -1.5 |
| 11/11/2017 4:26 AM | 5.2 | 4.5 | 8.8  | 3.1 | 4.1 | -0.260 | -1.5 |
| 11/11/2017 4:27 AM | 5.2 | 4.8 | 8.5  | 3.1 | 4.4 | -0.273 | -1.5 |
| 11/11/2017 4:28 AM | 5.3 | 3.7 | 8.6  | 3   | 4   | -0.262 | -1.5 |
| 11/11/2017 4:29 AM | 5.2 | 4.9 | 8.6  | 3   | 3.8 | -0.260 | -1.5 |
| 11/11/2017 4:30 AM | 5.3 | 4.8 | 9.1  | 2.9 | 4   | -0.269 | -1.5 |
| 11/11/2017 4:31 AM | 5.4 | 6   | 9.1  | 2.8 | 3.5 | -0.268 | -1.5 |
| 11/11/2017 4:32 AM | 5.6 | 4.6 | 8.9  | 2.8 | 3.7 | -0.262 | -1.5 |
| 11/11/2017 4:33 AM | 5.8 | 5   | 9.1  | 2.7 | 3.5 | -0.271 | -1.5 |
| 11/11/2017 4:34 AM | 5.6 | 3.5 | 8.6  | 2.7 | 3.7 | -0.268 | -1.5 |
| 11/11/2017 4:35 AM | 5.5 | 4.2 | 8.6  | 2.7 | 3.8 | -0.264 | -1.5 |
| 11/11/2017 4:36 AM | 5.4 | 6.6 | 9.3  | 2.6 | 3.6 | -0.263 | -1.5 |
| 11/11/2017 4:37 AM | 5.6 | 4.8 | 9.4  | 2.6 | 3.9 | -0.270 | -1.5 |
| 11/11/2017 4:38 AM | 5.8 | 4.4 | 9.3  | 2.5 | 3.5 | -0.264 | -1.5 |
| 11/11/2017 4:39 AM | 6.1 | 5.4 | 9.8  | 2.5 | 3.3 | -0.272 | -1.5 |
| 11/11/2017 4:40 AM | 6.2 | 4.5 | 9.4  | 2.5 | 3.5 | -0.274 | -1.5 |
| 11/11/2017 4:41 AM | 6.1 | 6.2 | 9.3  | 2.5 | 3.6 | -0.269 | -1.5 |
| 11/11/2017 4:42 AM | 6.3 | 5.3 | 10.4 | 2.5 | 3.5 | -0.260 | -1.5 |
| 11/11/2017 4:43 AM | 6.6 | 5.8 | 10.1 | 2.5 | 3.6 | -0.279 | -1.5 |
| 11/11/2017 4:44 AM | 6.8 | 4.7 | 9.4  | 2.4 | 3.6 | -0.272 | -1.5 |
| 11/11/2017 4:45 AM | 6.5 | 5.3 | 9.3  | 2.4 | 3.4 | -0.266 | -1.5 |
| 11/11/2017 4:46 AM | 6.3 | 5.8 | 9.6  | 2.4 | 3.6 | -0.272 | -1.5 |
| 11/11/2017 4:47 AM | 6.4 | 6.6 | 10.2 | 2.4 | 3.5 | -0.272 | -1.5 |
| 11/11/2017 4:48 AM | 6.7 | 7.5 | 10.1 | 2.4 | 3.3 | -0.265 | -1.5 |
| 11/11/2017 4:49 AM | 7   | 6.4 | 10.4 | 2.4 | 3.4 | -0.274 | -1.5 |
| 11/11/2017 4:50 AM | 7.1 | 4.2 | 10.1 | 2.4 | 3.7 | -0.271 | -1.5 |
| 11/11/2017 4:51 AM | 6.9 | 5.8 | 9.5  | 2.4 | 3.7 | -0.256 | -1.5 |
| 11/11/2017 4:52 AM | 6.9 | 5.8 | 9.9  | 2.4 | 3.7 | -0.269 | -1.5 |
| 11/11/2017 4:53 AM | 6.7 | 5.6 | 9.5  | 2.5 | 4.5 | -0.279 | -1.5 |
| 11/11/2017 4:54 AM | 6.5 | 4.5 | 9.5  | 2.6 | 4.3 | -0.268 | -1.5 |
| 11/11/2017 4:55 AM | 6.5 | 4.5 | 9.8  | 2.7 | 4.2 | -0.263 | -1.5 |
| 11/11/2017 4:56 AM | 6.3 | 5.6 | 9.2  | 2.7 | 4.7 | -0.278 | -1.5 |

|                    |     |     |      |     |     |        |      |
|--------------------|-----|-----|------|-----|-----|--------|------|
| 11/11/2017 4:57 AM | 6.3 | 5.4 | 9.4  | 2.8 | 4.6 | -0.267 | -1.5 |
| 11/11/2017 4:58 AM | 6.2 | 6.5 | 9.7  | 2.9 | 4.3 | -0.263 | -1.5 |
| 11/11/2017 4:59 AM | 6.3 | 4.4 | 10.1 | 2.9 | 4   | -0.284 | -1.5 |
| 11/11/2017 5:00 AM | 6.3 | 5.9 | 9.5  | 2.9 | 3.9 | -0.272 | -1.5 |
| 11/11/2017 5:01 AM | 6.4 | 5.1 | 9.6  | 2.9 | 3.7 | -0.268 | -1.5 |
| 11/11/2017 5:02 AM | 6.4 | 6.8 | 9.8  | 2.9 | 3.4 | -0.283 | -1.5 |
| 11/11/2017 5:03 AM | 6.4 | 5.8 | 9.5  | 2.9 | 3.6 | -0.274 | -1.5 |
| 11/11/2017 5:04 AM | 6.4 | 4.5 | 9.8  | 2.8 | 3.4 | -0.268 | -1.5 |
| 11/11/2017 5:05 AM | 6.6 | 5.7 | 10.1 | 2.7 | 3.2 | -0.277 | -1.5 |
| 11/11/2017 5:06 AM | 6.7 | 7.8 | 10.1 | 2.6 | 3.5 | -0.282 | -1.5 |
| 11/11/2017 5:07 AM | 6.8 | 5.2 | 10   | 2.6 | 3.2 | -0.267 | -1.5 |
| 11/11/2017 5:08 AM | 6.8 | 5.6 | 9.8  | 2.5 | 3.5 | -0.272 | -1.5 |
| 11/11/2017 5:09 AM | 6.8 | 4.2 | 9.2  | 2.5 | 3.5 | -0.282 | -1.5 |
| 11/11/2017 5:10 AM | 6.6 | 4.7 | 9.1  | 2.4 | 3.4 | -0.269 | -1.5 |
| 11/11/2017 5:11 AM | 6.4 | 4.4 | 9.8  | 2.4 | 3.4 | -0.273 | -1.5 |
| 11/11/2017 5:12 AM | 6.4 | 7.5 | 9.7  | 2.3 | 3.3 | -0.283 | -1.5 |
| 11/11/2017 5:13 AM | 6.8 | 5.8 | 10.4 | 2.3 | 3.2 | -0.276 | -1.5 |
| 11/11/2017 5:14 AM | 7   | 4.7 | 9.7  | 2.3 | 3.2 | -0.272 | -1.5 |
| 11/11/2017 5:15 AM | 7   | 6.5 | 10   | 2.3 | 3.5 | -0.278 | -1.5 |
| 11/11/2017 5:16 AM | 7   | 6.1 | 10.5 | 2.3 | 3.3 | -0.280 | -1.5 |
| 11/11/2017 5:17 AM | 7.1 | 7.1 | 10.7 | 2.2 | 3.6 | -0.274 | -1.5 |
| 11/11/2017 5:18 AM | 7.3 | 6.6 | 10.7 | 2.2 | 3.3 | -0.268 | -1.5 |
| 11/11/2017 5:19 AM | 7.5 | 6   | 10.8 | 2.2 | 3.1 | -0.285 | -1.5 |
| 11/11/2017 5:20 AM | 7.5 | 6.4 | 10   | 2.2 | 3.2 | -0.270 | -1.5 |
| 11/11/2017 5:21 AM | 7.4 | 5.2 | 10.6 | 2.2 | 3.3 | -0.271 | -1.5 |
| 11/11/2017 5:22 AM | 7.4 | 6.3 | 10.3 | 2.2 | 3.5 | -0.286 | -1.5 |
| 11/11/2017 5:23 AM | 7.2 | 5.2 | 10.2 | 2.2 | 3.3 | -0.271 | -1.5 |
| 11/11/2017 5:24 AM | 7.2 | 6.5 | 10.4 | 2.2 | 3.4 | -0.275 | -1.5 |
| 11/11/2017 5:25 AM | 7.3 | 6.6 | 10.9 | 2.2 | 3.3 | -0.278 | -1.5 |
| 11/11/2017 5:26 AM | 7.6 | 6.3 | 10.3 | 2.2 | 3   | -0.283 | -1.5 |
| 11/11/2017 5:27 AM | 7.7 | 5.5 | 10.7 | 2.2 | 3.1 | -0.270 | -1.5 |
| 11/11/2017 5:28 AM | 7.7 | 6.4 | 10.6 | 2.2 | 3.3 | -0.275 | -1.5 |
| 11/11/2017 5:29 AM | 7.5 | 5.1 | 9.8  | 2.2 | 3.3 | -0.290 | -1.5 |
| 11/11/2017 5:30 AM | 7.4 | 7.2 | 10.3 | 2.2 | 3.4 | -0.273 | -1.5 |
| 11/11/2017 5:31 AM | 7.2 | 4.5 | 10.1 | 2.2 | 3.3 | -0.272 | -1.5 |
| 11/11/2017 5:32 AM | 7.2 | 6.1 | 10.3 | 2.2 | 3.3 | -0.282 | -1.5 |
| 11/11/2017 5:33 AM | 7.3 | 6.2 | 10.7 | 2.2 | 3.1 | -0.281 | -1.5 |
| 11/11/2017 5:34 AM | 7.5 | 6.4 | 11   | 2.2 | 3.3 | -0.274 | -1.5 |
| 11/11/2017 5:35 AM | 7.6 | 6.9 | 10.8 | 2.2 | 3.6 | -0.278 | -1.5 |
| 11/11/2017 5:36 AM | 7.7 | 7.4 | 10.3 | 2.2 | 4   | -0.281 | -1.5 |
| 11/11/2017 5:37 AM | 7.6 | 6.9 | 10.5 | 2.3 | 3.9 | -0.274 | -1.5 |
| 11/11/2017 5:38 AM | 7.4 | 5.4 | 9.9  | 2.4 | 4   | -0.283 | -1.5 |
| 11/11/2017 5:39 AM | 7.1 | 6.3 | 9.9  | 2.4 | 4   | -0.285 | -1.5 |
| 11/11/2017 5:40 AM | 6.9 | 6.3 | 9.6  | 2.5 | 4.5 | -0.269 | -1.5 |
| 11/11/2017 5:41 AM | 6.7 | 4.7 | 9.9  | 2.6 | 4.3 | -0.276 | -1.5 |
| 11/11/2017 5:42 AM | 6.9 | 6.4 | 10.7 | 2.7 | 4.1 | -0.286 | -1.5 |
| 11/11/2017 5:43 AM | 7.1 | 8.3 | 10.6 | 2.8 | 3.7 | -0.280 | -1.5 |

|                    |     |     |      |           |     |        |      |
|--------------------|-----|-----|------|-----------|-----|--------|------|
| 11/11/2017 5:44 AM | 7.3 | 6.8 | 10.1 | 2.8       | 3.4 | -0.275 | -1.5 |
| 11/11/2017 5:45 AM | 7.4 | 5.5 | 10.4 | 2.8       | 3.6 | -0.284 | -1.5 |
| 11/11/2017 5:46 AM | 7.1 | 6.8 | 9.6  | 2.7       | 3.6 | -0.278 | -1.5 |
| 11/11/2017 5:47 AM | 7.1 | 6.7 | 10.3 | 2.7       | 3.6 | -0.271 | -1.5 |
| 11/11/2017 5:48 AM | 7.3 | 7.2 | 10.6 | 2.6       | 3.2 | -0.289 | -1.5 |
| 11/11/2017 5:49 AM | 7.6 | 7.1 | 10.7 | 2.5       | 3.5 | -0.282 | -1.5 |
| 11/11/2017 5:50 AM | 7.8 | 6.8 | 10.4 | 2.5       | 3.2 | -0.268 | -1.5 |
| 11/11/2017 5:51 AM | 7.7 | 6.3 | 10.6 | 2.4       | 3.2 | -0.281 | -1.5 |
| 11/11/2017 5:52 AM | 7.6 | 4.9 | 10.6 | 2.4       | 3.4 | -0.286 | -1.5 |
| 11/11/2017 5:53 AM | 7.6 | 6.9 | 10.4 | 2.3       | 3.4 | -0.281 | -1.5 |
| 11/11/2017 5:54 AM | 7.5 | 7.8 | 10.5 | 2.3       | 3.4 | -0.283 | -1.5 |
| 11/11/2017 5:55 AM | 7.3 | 5.7 | 9.8  | 2.2       | 3.4 | -0.286 | -1.5 |
| 11/11/2017 5:56 AM | 7.2 | 6.4 | 10.1 | 2.2       | 3.1 | -0.276 | -1.5 |
| 11/11/2017 5:57 AM | 7.1 | 5.5 | 10   | 2.2       | 3.2 | -0.279 | -1.5 |
| 11/11/2017 5:58 AM | 7.1 | 7.5 | 10.5 | 2.2       | 3.4 | -0.285 | -1.5 |
| 11/11/2017 5:59 AM | 7.3 | 5.8 | 10.6 | 2.1       | 3.4 | -0.285 | -1.5 |
| 11/11/2017 6:00 AM | 7.5 | 6.7 | 10.6 | 2.1_Zero  | 3.1 | -0.272 | -1.5 |
| 11/11/2017 6:01 AM | 7.8 | 6.6 | 11.4 | 2.1_Zero  | 3.3 | -0.286 | -1.5 |
| 11/11/2017 6:02 AM | 8   | 7.7 | 11.2 | 2.1_Zero  | 3.2 | -0.279 | -1.5 |
| 11/11/2017 6:03 AM | 8.1 | 7.7 | 11   | 2.1_Zero  | 3   | -0.274 | -1.5 |
| 11/11/2017 6:04 AM | 8.1 | 7.1 | 11   | 2.1_Zero  | 3.3 | -0.279 | -1.5 |
| 11/11/2017 6:05 AM | 7.9 | 6.8 | 10.4 | 2.1_Zero  | 3.3 | -0.281 | -1.5 |
| 11/11/2017 6:06 AM | 7.8 | 7.5 | 10.8 | 2.1_Zero  | 3.1 | -0.276 | -1.5 |
| 11/11/2017 6:07 AM | 7.8 | 7.7 | 10.9 | 2.1_Zero  | 3.1 | -0.278 | -1.5 |
| 11/11/2017 6:08 AM | 7.9 | 7.6 | 10.3 | 2.1_Zero  | 3.5 | -0.286 | -1.5 |
| 11/11/2017 6:09 AM | 7.8 | 5.5 | 10.7 | 2.1_Zero  | 3.3 | -0.279 | -1.5 |
| 11/11/2017 6:10 AM | 7.8 | 7   | 10.9 | 2.1_Zero  | 3   | -0.273 | -1.5 |
| 11/11/2017 6:11 AM | 7.8 | 6.6 | 10.6 | 2.1_Zero  | 3.1 | -0.285 | -1.5 |
| 11/11/2017 6:12 AM | 7.7 | 6.9 | 10.2 | 2.1_Zero  | 3.2 | -0.285 | -1.5 |
| 11/11/2017 6:13 AM | 7.5 | 5.9 | 10.1 | 2.1_Zero  | 3.1 | -0.272 | -1.5 |
| 11/11/2017 6:14 AM | 7.3 | 6.4 | 10.5 | 2.1_Zero  | 3.3 | -0.280 | -1.5 |
| 11/11/2017 6:15 AM | 7.3 | 5.3 | 10.3 | 2.1_Span  | 3.1 | -0.284 | -1.5 |
| 11/11/2017 6:16 AM | 7.4 | 8.1 | 10.8 | 2.1_Span  | 3.4 | -0.279 | -1.5 |
| 11/11/2017 6:17 AM | 7.6 | 7.6 | 10.6 | 2.1_Span  | 3.2 | -0.279 | -1.5 |
| 11/11/2017 6:18 AM | 7.7 | 6.9 | 10.7 | 2.1_Span  | 3.2 | -0.282 | -1.5 |
| 11/11/2017 6:19 AM | 7.7 | 7.2 | 10.6 | 2.1_Span  | 3.2 | -0.275 | -1.5 |
| 11/11/2017 6:20 AM | 7.7 | 7.6 | 10.8 | 2.1_Span  | 3   | -0.276 | -1.5 |
| 11/11/2017 6:21 AM | 7.9 | 7   | 11.1 | 2.1_Span  | 3.4 | -0.282 | -1.5 |
| 11/11/2017 6:22 AM | 8   | 6.3 | 10.9 | 2.1_Span  | 3   | -0.274 | -1.5 |
| 11/11/2017 6:23 AM | 8   | 6.2 | 10.6 | 2.1_Span  | 3.2 | -0.279 | -1.5 |
| 11/11/2017 6:24 AM | 7.9 | 7.3 | 11.3 | 2.1_Span  | 3.2 | -0.284 | -1.5 |
| 11/11/2017 6:25 AM | 8   | 8   | 11.1 | 2.1_Span  | 3.2 | -0.283 | -1.5 |
| 11/11/2017 6:26 AM | 8.1 | 7.8 | 11.1 | 2.1_Span  | 3.5 | -0.275 | -1.5 |
| 11/11/2017 6:27 AM | 8.2 | 6.9 | 10.9 | 2.1_Span  | 3.8 | -0.275 | -1.5 |
| 11/11/2017 6:28 AM | 8   | 6.4 | 10.2 | 2.2_Span  | 4.2 | -0.288 | -1.5 |
| 11/11/2017 6:29 AM | 7.7 | 6.6 | 10   | 2.3_Span  | 4   | -0.278 | -1.5 |
| 11/11/2017 6:30 AM | 7.4 | 6.1 | 9.9  | 2.4_Span1 | 4.2 | -0.278 | -1.5 |



|                    |     |     |      |           |     |        |      |
|--------------------|-----|-----|------|-----------|-----|--------|------|
| 11/11/2017 6:31 AM | 7.2 | 6.4 | 10   | 2.5_Span1 | 4.2 | -0.286 | -1.5 |
| 11/11/2017 6:32 AM | 7.2 | 6.7 | 10.1 | 2.6_Span1 | 4.3 | -0.282 | -1.5 |
| 11/11/2017 6:33 AM | 7.2 | 6.7 | 10.3 | 2.7_Span1 | 4.1 | -0.275 | -1.5 |
| 11/11/2017 6:34 AM | 7.2 | 5.4 | 10.2 | 2.8_Span1 | 3.8 | -0.280 | -1.5 |
| 11/11/2017 6:35 AM | 7.1 | 7.4 | 10.3 | 2.8_Span1 | 3.5 | -0.289 | -1.5 |
| 11/11/2017 6:36 AM | 7.3 | 7.3 | 11.2 | 2.8_Span1 | 3.4 | -0.277 | -1.5 |
| 11/11/2017 6:37 AM | 7.6 | 8   | 10.8 | 2.8_Span1 | 3.5 | -0.279 | -1.5 |
| 11/11/2017 6:38 AM | 7.9 | 6.2 | 10.6 | 2.7_Span1 | 3.6 | -0.285 | -1.5 |
| 11/11/2017 6:39 AM | 7.8 | 6.1 | 10.8 | 2.6_Span1 | 3.3 | -0.275 | -1.5 |
| 11/11/2017 6:40 AM | 7.8 | 7   | 10.9 | 2.5_Span1 | 3.2 | -0.282 | -1.5 |
| 11/11/2017 6:41 AM | 7.8 | 5.9 | 10.6 | 2.4_Span1 | 3.2 | -0.286 | -1.5 |
| 11/11/2017 6:42 AM | 7.7 | 6.6 | 10.4 | 2.4_Span1 | 3.2 | -0.280 | -1.5 |
| 11/11/2017 6:43 AM | 7.5 | 7.4 | 10.9 | 2.3_Span1 | 3.3 | -0.278 | -1.5 |
| 11/11/2017 6:44 AM | 7.5 | 6.5 | 10.6 | 2.3_Span1 | 3.2 | -0.282 | -1.5 |
| 11/11/2017 6:45 AM | 7.7 | 9   | 11.5 | 2.3_Span2 | 3   | -0.287 | -1.5 |
| 11/11/2017 6:46 AM | 8.1 | 6.3 | 11.6 | 2.2_Span2 | 3   | -0.276 | -1.5 |
| 11/11/2017 6:47 AM | 8.3 | 6.7 | 11   | 2.2_Span2 | 3   | -0.281 | -1.5 |
| 11/11/2017 6:48 AM | 8.5 | 8.4 | 10.8 | 2.2_Span2 | 3.1 | -0.289 | -1.5 |
| 11/11/2017 6:49 AM | 8.2 | 6.1 | 10.3 | 2.2_Span2 | 3.1 | -0.277 | -1.5 |
| 11/11/2017 6:50 AM | 7.8 | 5.7 | 9.9  | 2.1_Span2 | 3.4 | -0.278 | -1.5 |
| 11/11/2017 6:51 AM | 7.4 | 6.7 | 9.9  | 2.1_Span2 | 3.1 | -0.288 | -1.5 |
| 11/11/2017 6:52 AM | 7.2 | 5.7 | 10.1 | 2.1_Span2 | 3.3 | -0.286 | -1.5 |
| 11/11/2017 6:53 AM | 7.2 | 6.4 | 10   | 2.1_Span2 | 3.5 | -0.273 | -1.5 |
| 11/11/2017 6:54 AM | 7.1 | 5.7 | 9.5  | 2.1_Span2 | 3.7 | -0.282 | -1.5 |
| 11/11/2017 6:55 AM | 7   | 5.2 | 9.7  | 2.1_Span2 | 3.8 | -0.293 | -1.5 |
| 11/11/2017 6:56 AM | 7   | 6.7 | 9.9  | 2.1_Span2 | 3.5 | -0.277 | -1.5 |
| 11/11/2017 6:57 AM | 7   | 6   | 9.7  | 2.1_Span2 | 3.6 | -0.282 | -1.5 |
| 11/11/2017 6:58 AM | 7   | 6.4 | 9.9  | 2.1_Span2 | 3.6 | -0.288 | -1.5 |
| 11/11/2017 6:59 AM | 7.1 | 6   | 10.2 | 2.1_Span2 | 3.2 | -0.285 | -1.5 |
| 11/11/2017 7:00 AM | 7.3 | 7.5 | 10.5 | 2.1_Purge | 3.2 | -0.282 | -1.5 |
| 11/11/2017 7:01 AM | 7.5 | 7.3 | 10.4 | 2.1_Purge | 3.3 | -0.284 | -1.5 |
| 11/11/2017 7:02 AM | 7.7 | 7.3 | 11.1 | 2.1_Purge | 3.1 | -0.281 | -1.5 |
| 11/11/2017 7:03 AM | 7.9 | 7.9 | 11   | 2.2_Purge | 3.4 | -0.279 | -1.5 |
| 11/11/2017 7:04 AM | 8.2 | 7.5 | 11.1 | 2.3_Purge | 3   | -0.285 | -1.5 |
| 11/11/2017 7:05 AM | 8.4 | 7.7 | 11   | 2.3       | 3.1 | -0.290 | -1.5 |
| 11/11/2017 7:06 AM | 8.4 | 6.2 | 10.9 | 2.3       | 3.4 | -0.279 | -1.5 |
| 11/11/2017 7:07 AM | 8.1 | 6.9 | 10.7 | 2.3       | 3.3 | -0.279 | -1.5 |
| 11/11/2017 7:08 AM | 7.9 | 6.7 | 10.5 | 2.3       | 3.6 | -0.293 | -1.5 |
| 11/11/2017 7:09 AM | 7.8 | 6.3 | 10.8 | 2.3       | 3.3 | -0.282 | -1.5 |
| 11/11/2017 7:10 AM | 7.9 | 6.6 | 11   | 2.2       | 3.1 | -0.278 | -1.5 |
| 11/11/2017 7:11 AM | 8   | 7.8 | 10.9 | 2.2       | 3.1 | -0.290 | -1.5 |
| 11/11/2017 7:12 AM | 8.2 | 8.2 | 11.2 | 2.2       | 3.1 | -0.286 | -1.5 |
| 11/11/2017 7:13 AM | 8.2 | 6.7 | 11.2 | 2.3       | 3.2 | -0.279 | -1.5 |
| 11/11/2017 7:14 AM | 8.5 | 7.4 | 11.5 | 2.2       | 3.2 | -0.283 | -1.5 |
| 11/11/2017 7:15 AM | 8.4 | 8.2 | 11   | 2.2       | 3.2 | -0.291 | -1.5 |
| 11/11/2017 7:16 AM | 8.4 | 7.1 | 11   | 2.2       | 3.1 | -0.280 | -1.5 |
| 11/11/2017 7:17 AM | 8.3 | 7   | 11.2 | 2.2       | 3.2 | -0.278 | -1.5 |

|                    |     |     |      |     |     |        |      |
|--------------------|-----|-----|------|-----|-----|--------|------|
| 11/11/2017 7:18 AM | 8   | 7.3 | 10.2 | 2.2 | 3.1 | -0.288 | -1.5 |
| 11/11/2017 7:19 AM | 7.7 | 6.1 | 10.3 | 2.2 | 3.6 | -0.290 | -1.5 |
| 11/11/2017 7:20 AM | 7.5 | 6.1 | 10.1 | 2.2 | 3.6 | -0.278 | -1.5 |
| 11/11/2017 7:21 AM | 7.3 | 5.7 | 9.7  | 2.3 | 3.9 | -0.284 | -1.5 |
| 11/11/2017 7:22 AM | 7.2 | 7.7 | 10.2 | 2.4 | 4   | -0.287 | -1.5 |
| 11/11/2017 7:23 AM | 7.2 | 6.4 | 10.8 | 2.5 | 3.8 | -0.285 | -1.5 |
| 11/11/2017 7:24 AM | 7.4 | 7.4 | 10.4 | 2.6 | 4.4 | -0.277 | -1.5 |
| 11/11/2017 7:25 AM | 7.6 | 6.3 | 10.4 | 2.7 | 4.3 | -0.290 | -1.5 |
| 11/11/2017 7:26 AM | 7.7 | 6.9 | 10.6 | 2.8 | 3.9 | -0.277 | -1.5 |
| 11/11/2017 7:27 AM | 7.7 | 5.5 | 10.8 | 2.9 | 3.7 | -0.279 | -1.5 |
| 11/11/2017 7:28 AM | 7.9 | 6.1 | 10.7 | 3   | 3.6 | -0.288 | -1.5 |
| 11/11/2017 7:29 AM | 7.8 | 5.9 | 9.9  | 3   | 3.7 | -0.284 | -1.5 |
| 11/11/2017 7:30 AM | 7.5 | 5.2 | 9.4  | 2.9 | 3.7 | -0.281 | -1.5 |
| 11/11/2017 7:31 AM | 7.1 | 6.6 | 9.3  | 2.9 | 3.3 | -0.279 | -1.5 |
| 11/11/2017 7:32 AM | 6.9 | 5.3 | 9.9  | 2.8 | 3.3 | -0.291 | -1.5 |
| 11/11/2017 7:33 AM | 6.9 | 5.4 | 9.6  | 2.7 | 3.6 | -0.279 | -1.5 |
| 11/11/2017 7:34 AM | 6.9 | 6   | 9.6  | 2.7 | 3.5 | -0.285 | -1.5 |
| 11/11/2017 7:35 AM | 6.8 | 5.7 | 9.4  | 2.6 | 3.5 | -0.289 | -1.5 |
| 11/11/2017 7:36 AM | 6.7 | 5.2 | 9.3  | 2.5 | 3.5 | -0.281 | -1.5 |
| 11/11/2017 7:37 AM | 6.7 | 4.5 | 9.6  | 2.5 | 3.6 | -0.282 | -1.5 |
| 11/11/2017 7:38 AM | 6.7 | 6.5 | 9.6  | 2.5 | 3.8 | -0.292 | -1.5 |
| 11/11/2017 7:39 AM | 6.9 | 6.3 | 9.9  | 2.5 | 3.3 | -0.288 | -1.5 |
| 11/11/2017 7:40 AM | 7   | 6.7 | 10   | 2.4 | 3.3 | -0.284 | -1.5 |
| 11/11/2017 7:41 AM | 7.3 | 5.5 | 10.1 | 2.4 | 3.2 | -0.285 | -1.5 |
| 11/11/2017 7:42 AM | 7.3 | 5.8 | 10   | 2.4 | 3.4 | -0.293 | -1.5 |
| 11/11/2017 7:43 AM | 7.4 | 5.8 | 10.5 | 2.4 | 3.4 | -0.282 | -1.5 |
| 11/11/2017 7:44 AM | 7.5 | 6.5 | 10.4 | 2.3 | 3.2 | -0.284 | -1.5 |
| 11/11/2017 7:45 AM | 7.5 | 6.6 | 10.2 | 2.4 | 3.4 | -0.289 | -1.5 |
| 11/11/2017 7:46 AM | 7.6 | 7.4 | 11   | 2.3 | 3.3 | -0.284 | -1.5 |
| 11/11/2017 7:47 AM | 7.8 | 6.5 | 10.8 | 2.3 | 3.3 | -0.279 | -1.5 |
| 11/11/2017 7:48 AM | 7.9 | 6.5 | 10   | 2.3 | 3.3 | -0.290 | -1.5 |
| 11/11/2017 7:49 AM | 7.8 | 7.3 | 10.4 | 2.3 | 3.3 | -0.288 | -1.5 |
| 11/11/2017 7:50 AM | 7.7 | 7.9 | 11   | 2.3 | 3.1 | -0.281 | -1.5 |
| 11/11/2017 7:51 AM | 8   | 7.5 | 11   | 2.3 | 3.2 | -0.292 | -1.5 |
| 11/11/2017 7:52 AM | 8.3 | 7.7 | 11.2 | 2.3 | 3.3 | -0.287 | -1.5 |
| 11/11/2017 7:53 AM | 8.5 | 7   | 10.9 | 2.3 | 2.8 | -0.284 | -1.5 |
| 11/11/2017 7:54 AM | 8.5 | 8.6 | 11.3 | 2.3 | 3.1 | -0.288 | -1.5 |
| 11/11/2017 7:55 AM | 8.4 | 7.5 | 10.5 | 2.3 | 3.1 | -0.295 | -1.5 |
| 11/11/2017 7:56 AM | 8.3 | 6.4 | 11   | 2.3 | 3.3 | -0.278 | -1.5 |
| 11/11/2017 7:57 AM | 8   | 6.6 | 10.3 | 2.3 | 3.4 | -0.289 | -1.5 |
| 11/11/2017 7:58 AM | 7.7 | 5.3 | 10.3 | 2.3 | 3.4 | -0.295 | -1.5 |
| 11/11/2017 7:59 AM | 7.8 | 5.4 | 11.1 | 2.3 | 3.3 | -0.281 | -1.5 |
| 11/11/2017 8:00 AM | 8   | 5.2 | 11   | 2.3 | 3.4 | -0.287 | -1.5 |
| 11/11/2017 8:01 AM | 8.3 | 6.5 | 11.2 | 2.3 | 3.3 | -0.292 | -1.5 |
| 11/11/2017 8:02 AM | 8.6 | 9.8 | 11.8 | 2.3 | 2.9 | -0.284 | -1.5 |
| 11/11/2017 8:03 AM | 9   | 9.6 | 12.2 | 2.3 | 3   | -0.285 | -1.5 |
| 11/11/2017 8:04 AM | 9.3 | 8.8 | 11.7 | 2.3 | 3.1 | -0.297 | -1.5 |

|                    |     |     |      |     |      |        |      |
|--------------------|-----|-----|------|-----|------|--------|------|
| 11/11/2017 8:05 AM | 9.2 | 7.4 | 11.1 | 2.5 | 2.8  | -0.296 | -1.5 |
| 11/11/2017 8:06 AM | 8.8 | 6.5 | 10.6 | 2.4 | 3.1  | -0.285 | -1.5 |
| 11/11/2017 8:07 AM | 8.3 | 5.7 | 9.9  | 2.4 | 3.3  | -0.289 | -1.5 |
| 11/11/2017 8:08 AM | 7.8 | 5.9 | 10   | 2.4 | 3.2  | -0.295 | -1.5 |
| 11/11/2017 8:09 AM | 7.6 | 7.3 | 10.2 | 2.5 | 3.3  | -0.284 | -1.5 |
| 11/11/2017 8:10 AM | 7.6 | 6.6 | 10.6 | 2.4 | 3.3  | -0.284 | -1.5 |
| 11/11/2017 8:11 AM | 7.8 | 6.7 | 10.6 | 2.4 | 3.3  | -0.300 | -1.5 |
| 11/11/2017 8:12 AM | 8   | 7.1 | 10.7 | 2.5 | 3.2  | -0.282 | -1.5 |
| 11/11/2017 8:13 AM | 8.2 | 8.7 | 11.3 | 2.5 | 3.2  | -0.285 | -1.5 |
| 11/11/2017 8:14 AM | 8.2 | 7.7 | 10.5 | 2.5 | 3.1  | -0.295 | -1.5 |
| 11/11/2017 8:15 AM | 8   | 6.4 | 10   | 2.5 | 3.2  | -0.297 | -1.5 |
| 11/11/2017 8:16 AM | 7.8 | 5.4 | 10.1 | 2.5 | 3.5  | -0.284 | -1.5 |
| 11/11/2017 8:17 AM | 7.6 | 7.4 | 10.2 | 2.5 | 3.9  | -0.289 | -1.5 |
| 11/11/2017 8:18 AM | 7.6 | 6.3 | 10.3 | 2.6 | 4.1  | -0.297 | -1.5 |
| 11/11/2017 8:19 AM | 7.8 | 8.5 | 11.1 | 2.7 | 4.1  | -0.276 | -1.5 |
| 11/11/2017 8:20 AM | 8.1 | 6.5 | 10.8 | 2.8 | 4    | -0.290 | -1.5 |
| 11/11/2017 8:21 AM | 8.3 | 7.9 | 10.8 | 2.9 | 4.4  | -0.292 | -1.5 |
| 11/11/2017 8:22 AM | 8.2 | 6.3 | 10.3 | 3   | 4.2  | -0.285 | -1.5 |
| 11/11/2017 8:23 AM | 8.2 | 7.1 | 11.2 | 3.1 | 4    | -0.285 | -1.5 |
| 11/11/2017 8:24 AM | 8.4 | 8   | 11.6 | 3.2 | 3.6  | -0.296 | -1.5 |
| 11/11/2017 8:25 AM | 8.7 | 8.9 | 11.3 | 3.2 | 3.5  | -0.288 | -1.5 |
| 11/11/2017 8:26 AM | 8.9 | 8.7 | 11.3 | 3.2 | 3.8  | -0.288 | -1.5 |
| 11/11/2017 8:27 AM | 8.8 | 7.4 | 11.2 | 3.2 | 3.5  | -0.296 | -1.5 |
| 11/11/2017 8:28 AM | 8.7 | 7.2 | 10.8 | 3.1 | 3.3  | -0.291 | -1.5 |
| 11/11/2017 8:29 AM | 8.6 | 7   | 11.9 | 3   | 3.2  | -0.283 | -1.5 |
| 11/11/2017 8:30 AM | 8.7 | 8.1 | 11.4 | 3   | 3.2  | -0.294 | -1.5 |
| 11/11/2017 8:31 AM | 8.8 | 8.7 | 10.5 | 2.9 | 3.5  | -0.290 | -1.5 |
| 11/11/2017 8:32 AM | 8.6 | 6.7 | 10.6 | 2.9 | 3.4  | -0.289 | -1.5 |
| 11/11/2017 8:33 AM | 7.8 | 4.6 | 9.2  | 2.8 | 10.6 | -0.285 | -1.5 |
| 11/11/2017 8:34 AM | 7   | 4.9 | 8.5  | 2.9 | 8.8  | -0.300 | -1.5 |
| 11/11/2017 8:35 AM | 6.3 | 5.2 | 8.8  | 3.2 | 7.5  | -0.287 | -1.5 |
| 11/11/2017 8:36 AM | 6.3 | 6   | 9.9  | 3.6 | 6.1  | -0.285 | -1.5 |
| 11/11/2017 8:37 AM | 6.6 | 7.2 | 9.6  | 3.9 | 5.5  | -0.291 | -1.5 |
| 11/11/2017 8:38 AM | 7   | 7.9 | 10.2 | 4.1 | 5.1  | -0.283 | -1.5 |
| 11/11/2017 8:39 AM | 7.4 | 5.8 | 10.5 | 4.1 | 4.4  | -0.279 | -1.5 |
| 11/11/2017 8:40 AM | 7.7 | 7.5 | 10.7 | 4.1 | 4.1  | -0.283 | -1.5 |
| 11/11/2017 8:41 AM | 8   | 6.9 | 10.5 | 4   | 4    | -0.292 | -1.5 |
| 11/11/2017 8:42 AM | 8.1 | 8   | 11.2 | 3.9 | 3.5  | -0.243 | -1.5 |
| 11/11/2017 8:43 AM | 8.1 | 7.2 | 10.8 | 3.7 | 3.7  | -0.226 | -1.5 |
| 11/11/2017 8:44 AM | 8   | 7   | 10.2 | 3.6 | 3.7  | -0.246 | -1.5 |
| 11/11/2017 8:45 AM | 7.8 | 6.4 | 10.1 | 3.5 | 3.4  | -0.246 | -1.5 |
| 11/11/2017 8:46 AM | 7.5 | 8.3 | 10.4 | 3.4 | 3.5  | -0.251 | -1.5 |
| 11/11/2017 8:47 AM | 7.7 | 7.5 | 11.3 | 3.3 | 3.3  | -0.270 | -1.5 |
| 11/11/2017 8:48 AM | 7.9 | 7.3 | 11.5 | 3.2 | 3.1  | -0.265 | -1.5 |
| 11/11/2017 8:49 AM | 8.3 | 7.9 | 11.8 | 3.1 | 3.2  | -0.270 | -1.5 |
| 11/11/2017 8:50 AM | 8.7 | 8.3 | 12.4 | 3   | 3.3  | -0.274 | -1.5 |
| 11/11/2017 8:51 AM | 9.1 | 8.1 | 12.1 | 2.9 | 3.3  | -0.282 | -1.5 |

|                    |      |      |      |     |     |        |      |
|--------------------|------|------|------|-----|-----|--------|------|
| 11/11/2017 8:52 AM | 9.4  | 8    | 11.9 | 2.9 | 3.1 | -0.276 | -1.5 |
| 11/11/2017 8:53 AM | 9.2  | 8.8  | 11.5 | 2.8 | 3.2 | -0.279 | -1.5 |
| 11/11/2017 8:54 AM | 8.9  | 8.9  | 11.1 | 2.7 | 3.6 | -0.071 | -1.5 |
| 11/11/2017 8:55 AM | 8.7  | 8.6  | 11.6 | 2.7 | 4.1 | 0.112  | -1.5 |
| 11/11/2017 8:56 AM | 8.7  | 7.7  | 11.3 | 2.7 | 3.8 | 0.030  | -1.5 |
| 11/11/2017 8:57 AM | 8.7  | 6.6  | 11.3 | 2.7 | 3.5 | -0.024 | -1.5 |
| 11/11/2017 8:58 AM | 8.8  | 11.8 | 13.7 | 2.7 | 3.2 | -0.082 | -1.5 |
| 11/11/2017 8:59 AM | 11.5 | 22.5 | 23.9 | 2.8 | 1.6 | -0.224 | -1.5 |
| 11/11/2017 9:00 AM | 16.3 | 23.5 | 25.9 | 2.7 | 1.4 | -0.288 | -1.5 |
| 11/11/2017 9:01 AM | 21.2 | 23   | 24.6 | 2.6 | 1.8 | -0.295 | -1.5 |
| 11/11/2017 9:02 AM | 23.4 | 21   | 23.8 | 2.5 | 1.5 | -0.286 | -1.5 |
| 11/11/2017 9:03 AM | 23.2 | 23.7 | 24.1 | 2.4 | 1.8 | -0.297 | -1.5 |
| 11/11/2017 9:04 AM | 22.9 | 20.6 | 23.1 | 2.4 | 1.8 | -0.300 | -1.5 |
| 11/11/2017 9:05 AM | 22   | 17.5 | 20.5 | 2.4 | 2.3 | -0.269 | -1.5 |
| 11/11/2017 9:06 AM | 19.6 | 12   | 15.4 | 2.5 | 8.6 | 3.488  | -1.5 |
| 11/11/2017 9:07 AM | 15.7 | 8.6  | 11.6 | 2.6 | 7.8 | 3.617  | -1.5 |
| 11/11/2017 9:08 AM | 12   | 9.3  | 11.2 | 3.1 | 6.4 | 2.501  | -1.5 |
| 11/11/2017 9:09 AM | 9.9  | 7.5  | 10.9 | 3.7 | 6   | 1.649  | -1.5 |
| 11/11/2017 9:10 AM | 8.9  | 5.8  | 9.3  | 4.2 | 5.6 | 1.380  | -1.5 |
| 11/11/2017 9:11 AM | 8.5  | 6.8  | 9.3  | 4.6 | 5.3 | 1.035  | -1.5 |
| 11/11/2017 9:12 AM | 8    | 7.8  | 9.6  | 5   | 4.4 | 0.806  | -1.5 |
| 11/11/2017 9:13 AM | 8.1  | 8.2  | 10.3 | 5.1 | 4   | 0.584  | -1.5 |
| 11/11/2017 9:14 AM | 8.4  | 7    | 10.2 | 5.1 | 3.8 | 0.401  | -1.5 |
| 11/11/2017 9:15 AM | 8.6  | 8.3  | 10.4 | 4.9 | 3.4 | 0.282  | -1.5 |
| 11/11/2017 9:16 AM | 8.7  | 7.7  | 10.3 | 4.7 | 3.2 | 0.179  | -1.5 |
| 11/11/2017 9:17 AM | 8.8  | 8.2  | 10.1 | 4.4 | 3.6 | 0.086  | -1.5 |
| 11/11/2017 9:18 AM | 8.7  | 7.6  | 9.6  | 4.1 | 3.4 | 0.028  | -1.5 |
| 11/11/2017 9:19 AM | 8.4  | 5.5  | 9.4  | 3.9 | 3.3 | -0.007 | -1.5 |
| 11/11/2017 9:20 AM | 7.8  | 5.7  | 8.9  | 3.7 | 3.5 | -0.051 | -1.5 |
| 11/11/2017 9:21 AM | 7.5  | 5.8  | 9.2  | 3.6 | 3.7 | -0.091 | -1.5 |
| 11/11/2017 9:22 AM | 7.3  | 6.8  | 9    | 3.5 | 3.6 | -0.121 | -1.5 |
| 11/11/2017 9:23 AM | 7.2  | 5.8  | 8.9  | 3.4 | 3.4 | -0.145 | -1.5 |
| 11/11/2017 9:24 AM | 7.3  | 6.2  | 9.6  | 3.3 | 3.4 | -0.166 | -1.5 |
| 11/11/2017 9:25 AM | 7.7  | 6.8  | 10.6 | 3.2 | 3.3 | -0.193 | -1.5 |
| 11/11/2017 9:26 AM | 8.4  | 7.5  | 11.3 | 3.2 | 3.4 | -0.214 | -1.5 |
| 11/11/2017 9:27 AM | 9.1  | 8.1  | 11.6 | 3.1 | 3.1 | -0.221 | -1.5 |
| 11/11/2017 9:28 AM | 9.6  | 10.3 | 11.8 | 3.1 | 2.9 | -0.248 | -1.5 |
| 11/11/2017 9:29 AM | 10.1 | 10.8 | 12   | 3.1 | 2.7 | -0.259 | -1.5 |
| 11/11/2017 9:30 AM | 10.1 | 8.8  | 10.7 | 3   | 2.9 | -0.253 | -1.5 |
| 11/11/2017 9:31 AM | 9.8  | 7.9  | 10.8 | 3   | 3   | -0.265 | -1.5 |
| 11/11/2017 9:32 AM | 9.3  | 8.7  | 10.4 | 2.9 | 3.1 | -0.270 | -1.5 |
| 11/11/2017 9:33 AM | 8.9  | 6.8  | 9.6  | 2.9 | 3   | -0.247 | -1.5 |
| 11/11/2017 9:34 AM | 8.6  | 7.6  | 10.3 | 2.9 | 3.4 | -0.252 | -1.5 |
| 11/11/2017 9:35 AM | 8.5  | 7.4  | 10.3 | 2.9 | 3.1 | -0.268 | -1.5 |
| 11/11/2017 9:36 AM | 8.6  | 7.9  | 10.3 | 2.9 | 3.1 | -0.266 | -1.5 |
| 11/11/2017 9:37 AM | 8.9  | 7    | 11   | 2.8 | 3.1 | -0.267 | -1.5 |
| 11/11/2017 9:38 AM | 9    | 8.7  | 10.6 | 2.8 | 3.2 | -0.268 | -1.5 |

|                     |      |      |      |     |      |        |      |
|---------------------|------|------|------|-----|------|--------|------|
| 11/11/2017 9:39 AM  | 9.1  | 8.2  | 10.1 | 2.8 | 2.9  | -0.285 | -1.5 |
| 11/11/2017 9:40 AM  | 9    | 8    | 10.4 | 2.8 | 2.9  | -0.277 | -1.5 |
| 11/11/2017 9:41 AM  | 8.9  | 8    | 10.2 | 2.8 | 2.9  | -0.284 | -1.5 |
| 11/11/2017 9:42 AM  | 8.7  | 7.3  | 10.7 | 2.8 | 3.1  | -0.280 | -1.5 |
| 11/11/2017 9:43 AM  | 8.9  | 7.3  | 10.9 | 2.8 | 2.8  | -0.285 | -1.5 |
| 11/11/2017 9:44 AM  | 9.2  | 8    | 10.8 | 2.8 | 2.9  | -0.276 | -1.5 |
| 11/11/2017 9:45 AM  | 9.5  | 8.3  | 11.3 | 2.8 | 2.7  | -0.270 | -1.5 |
| 11/11/2017 9:46 AM  | 9.6  | 8.1  | 10.5 | 2.8 | 3    | -0.288 | -1.5 |
| 11/11/2017 9:47 AM  | 9.2  | 7.4  | 10.4 | 2.8 | 3    | -0.283 | -1.5 |
| 11/11/2017 9:48 AM  | 9    | 7.7  | 10.1 | 2.8 | 2.8  | -0.276 | -1.5 |
| 11/11/2017 9:49 AM  | 8.8  | 11.9 | 12.2 | 2.8 | 2.8  | -0.278 | -1.5 |
| 11/11/2017 9:50 AM  | 11.8 | 20.7 | 23   | 2.8 | 1.9  | -0.288 | -1.5 |
| 11/11/2017 9:51 AM  | 16.5 | 20.9 | 23.3 | 2.7 | 1.2  | -0.281 | -1.5 |
| 11/11/2017 9:52 AM  | 21.3 | 21.1 | 23.7 | 2.7 | 1.3  | -0.280 | -1.5 |
| 11/11/2017 9:53 AM  | 23.3 | 20.7 | 23.8 | 2.6 | 1.1  | -0.294 | -1.5 |
| 11/11/2017 9:54 AM  | 23.4 | 22.9 | 24   | 2.5 | 1.1  | -0.293 | -1.5 |
| 11/11/2017 9:55 AM  | 23.6 | 21.7 | 23.8 | 2.4 | 1.2  | -0.282 | -1.5 |
| 11/11/2017 9:56 AM  | 23.3 | 21.4 | 23.1 | 2.4 | 1.2  | -0.282 | -1.5 |
| 11/11/2017 9:57 AM  | 23.4 | 24.4 | 24.2 | 2.3 | 1.5  | -0.292 | -1.5 |
| 11/11/2017 9:58 AM  | 23.4 | 22.8 | 23.8 | 2.3 | 1.2  | -0.286 | -1.5 |
| 11/11/2017 9:59 AM  | 23.7 | 21.5 | 23.5 | 2.3 | 1.5  | -0.281 | -1.5 |
| 11/11/2017 10:00 AM | 23.4 | 20.7 | 23   | 2.3 | 1.3  | -0.295 | -1.5 |
| 11/11/2017 10:01 AM | 22.8 | 22.2 | 22.6 | 2.3 | 1.3  | -0.282 | -1.5 |
| 11/11/2017 10:02 AM | 22.7 | 24   | 23.5 | 2.3 | 1.3  | -0.285 | -1.5 |
| 11/11/2017 10:03 AM | 23.1 | 23.9 | 23.2 | 2.2 | 1.3  | -0.288 | -1.5 |
| 11/11/2017 10:04 AM | 23.7 | 22.6 | 24.3 | 2.3 | 1.6  | -0.289 | -1.5 |
| 11/11/2017 10:05 AM | 23.8 | 22.1 | 23   | 2.3 | 1.4  | -0.275 | -1.5 |
| 11/11/2017 10:06 AM | 23.6 | 23   | 23.3 | 2.3 | 1.3  | -0.252 | -1.5 |
| 11/11/2017 10:07 AM | 23.8 | 25.3 | 24   | 2.5 | 1.2  | -0.260 | -1.5 |
| 11/11/2017 10:08 AM | 24   | 21.5 | 23.7 | 2.5 | 1.3  | -0.283 | -1.5 |
| 11/11/2017 10:09 AM | 24.3 | 24   | 24.3 | 2.5 | 1.4  | -0.276 | -1.5 |
| 11/11/2017 10:10 AM | 24.4 | 25.5 | 24.2 | 2.5 | 1.3  | -0.268 | -1.5 |
| 11/11/2017 10:11 AM | 24.5 | 22.7 | 24.1 | 2.4 | 1.3  | -0.234 | -1.5 |
| 11/11/2017 10:12 AM | 24.1 | 37.5 | 46.6 | 2.5 | 11   | 5.187  | -1.5 |
| 11/11/2017 10:13 AM | 23.2 | 29.1 | 27.9 | 2.7 | 7.5  | 2.506  | -1.5 |
| 11/11/2017 10:14 AM | 23   | 28.4 | 26.3 | 3.5 | 2.3  | 0.981  | -1.5 |
| 11/11/2017 10:15 AM | 23.1 | 29   | 27.7 | 4.2 | 9.6  | 8.647  | -1.5 |
| 11/11/2017 10:16 AM | 22.9 | 34.6 | 30.1 | 4.5 | 10.9 | 20.972 | -1.5 |
| 11/11/2017 10:17 AM | 22.4 | 24.6 | 20.6 | 5.1 | 7.7  | 13.072 | -1.5 |
| 11/11/2017 10:18 AM | 22.1 | 22.5 | 20.5 | 5.8 | 8.9  | 11.159 | -1.5 |
| 11/11/2017 10:19 AM | 21   | 16.1 | 15.4 | 6.5 | 9.5  | 11.657 | -1.5 |
| 11/11/2017 10:20 AM | 18.5 | 14.4 | 15.1 | 7.1 | 9.3  | 13.289 | -1.5 |
| 11/11/2017 10:21 AM | 15.3 | 9.4  | 11.4 | 7.5 | 9    | 14.832 | -1.5 |
| 11/11/2017 10:22 AM | 12.2 | 8    | 8.1  | 7.9 | 11.1 | 18.283 | -1.5 |
| 11/11/2017 10:23 AM | 9.4  | 4.1  | 6.8  | 8.5 | 14.5 | 22.958 | -1.5 |
| 11/11/2017 10:24 AM | 6.8  | 7.6  | 5.5  | 9.1 | 14.3 | 23.257 | -1.5 |
| 11/11/2017 10:25 AM | 5.4  | 6.6  | 6    | 9.8 | 14.5 | 23.633 | -1.5 |

|                     |      |      |      |      |       |        |      |
|---------------------|------|------|------|------|-------|--------|------|
| 11/11/2017 10:26 AM | 5.4  | 11.1 | 8.5  | 10.5 | 13.5  | 23.193 | -1.5 |
| 11/11/2017 10:27 AM | 9.1  | 20.5 | 19.7 | 11   | 10.6  | 16.798 | -1.5 |
| 11/11/2017 10:28 AM | 13.4 | 16.6 | 15.6 | 11.2 | 7.8   | 14.430 | -1.5 |
| 11/11/2017 10:29 AM | 17.1 | 17.6 | 17.5 | 10.9 | 5.9   | 13.553 | -1.5 |
| 11/11/2017 10:30 AM | 16.7 | 13.5 | 13.8 | 10.5 | 6.7   | 14.591 | -1.5 |
| 11/11/2017 10:31 AM | 14.1 | 12   | 11.7 | 9.9  | 18.5  | 16.371 | -1.5 |
| 11/11/2017 10:32 AM | 11   | 9.7  | 8.5  | 9.6  | 14.9  | 17.752 | -1.5 |
| 11/11/2017 10:33 AM | 8.3  | 8.3  | 7.8  | 9.7  | 12.9  | 17.869 | -1.5 |
| 11/11/2017 10:34 AM | 7    | 6.3  | 7.6  | 10.1 | 10.1  | 16.270 | -1.5 |
| 11/11/2017 10:35 AM | 6.6  | 7.9  | 7.7  | 10.4 | 9.3   | 15.904 | -1.5 |
| 11/11/2017 10:36 AM | 6.6  | 6.4  | 7.7  | 10.6 | 7.9   | 14.521 | -1.5 |
| 11/11/2017 10:37 AM | 6.6  | 8.6  | 7.1  | 10.5 | 7.9   | 14.289 | -1.5 |
| 11/11/2017 10:38 AM | 6.6  | 4.4  | 6.8  | 10.3 | 6.9   | 12.563 | -1.3 |
| 11/11/2017 10:39 AM | 6.3  | 4.8  | 6.5  | 9.9  | 6.3   | 11.005 | 5    |
| 11/11/2017 10:40 AM | 6.1  | 6.9  | 6.4  | 9.4  | 5.5   | 9.481  | 1.3  |
| 11/11/2017 10:41 AM | 6.7  | 11.1 | 11.9 | 9    | 6.9   | 7.188  | -1.5 |
| 11/11/2017 10:42 AM | 8.7  | 12.3 | 15.2 | 8.7  | 6.3   | 3.724  | -1.5 |
| 11/11/2017 10:43 AM | 11.3 | 14.5 | 14.8 | 8.3  | 6.8   | 1.944  | -1.5 |
| 11/11/2017 10:44 AM | 13.3 | 12.2 | 14.8 | 8    | 9.6   | 0.757  | -1.5 |
| 11/11/2017 10:45 AM | 14   | 11.5 | 12.8 | 8.3  | 7.8   | 0.474  | -1.5 |
| 11/11/2017 10:46 AM | 13.9 | 12.6 | 14.2 | 8.7  | 12.4  | 0.323  | -1.4 |
| 11/11/2017 10:47 AM | 15   | 17.9 | 18   | 8.8  | 16.6  | -0.104 | -1.5 |
| 11/11/2017 10:48 AM | 15.6 | 14.2 | 20.1 | 8.9  | 30.1  | -0.146 | -1.5 |
| 11/11/2017 10:49 AM | 17.1 | 18.8 | 23.2 | 10.5 | 9.2   | 0.479  | -1.5 |
| 11/11/2017 10:50 AM | 18.6 | 19.6 | 23.7 | 11.8 | 7.5   | 0.606  | -1.5 |
| 11/11/2017 10:51 AM | 20.7 | 19.9 | 24.2 | 10.8 | 5.5   | 0.086  | -1.5 |
| 11/11/2017 10:52 AM | 22.2 | 16.7 | 19   | 9    | 3.9   | 0.068  | -1.4 |
| 11/11/2017 10:53 AM | 20   | 11.3 | 13.3 | 7.8  | 15.8  | 0.249  | -1.4 |
| 11/11/2017 10:54 AM | 14.6 | 4.2  | 4.7  | 7.9  | 87.6  | 0.244  | -1.5 |
| 11/11/2017 10:55 AM | 9.5  | 6.1  | 10.5 | 11.7 | 37.8  | 0.157  | -1.5 |
| 11/11/2017 10:56 AM | 6.7  | 3.4  | 7.4  | 15.7 | 63.8  | 0.319  | -1.5 |
| 11/11/2017 10:57 AM | 7    | 7    | 10.8 | 17.5 | 30.8  | 0.262  | -1.5 |
| 11/11/2017 10:58 AM | 8.1  | 8.4  | 11.9 | 17.8 | 17.3  | 0.518  | -1.5 |
| 11/11/2017 10:59 AM | 7.7  | 0.8  | 2.8  | 16.9 | 202.9 | 1.050  | -1.5 |
| 11/11/2017 11:00 AM | 6    | 1.3  | 4.9  | 18   | 95.8  | 0.871  | -1.5 |
| 11/11/2017 11:01 AM | 4.8  | 5.9  | 9.2  | 19.7 | 40.8  | 0.459  | -1.5 |
| 11/11/2017 11:02 AM | 5.9  | 8.5  | 12.9 | 19.6 | 21.6  | 0.437  | -1.5 |
| 11/11/2017 11:03 AM | 8.5  | 11.7 | 12.8 | 18.1 | 13.2  | 0.624  | -1.5 |
| 11/11/2017 11:04 AM | 10.6 | 12.5 | 14.2 | 15.9 | 8.8   | 0.661  | -1.5 |
| 11/11/2017 11:05 AM | 12.3 | 12.5 | 15.5 | 13.6 | 6.6   | 0.788  | -1.5 |
| 11/11/2017 11:06 AM | 14.4 | 16.6 | 21.1 | 13.2 | 4.6   | 0.085  | -1.5 |
| 11/11/2017 11:07 AM | 15.5 | 12.8 | 15.4 | 12.5 | 6     | 0.201  | -1.4 |
| 11/11/2017 11:08 AM | 15.2 | 9.9  | 14.8 | 6.3  | 12.2  | 0.243  | -1.5 |
| 11/11/2017 11:09 AM | 13.3 | 8    | 11.2 | 6.3  | 25.7  | 0.551  | -1.5 |
| 11/11/2017 11:10 AM | 10.3 | 6.3  | 7.7  | 8.2  | 44.4  | 0.941  | -1.5 |
| 11/11/2017 11:11 AM | 8.3  | 5.3  | 7.3  | 11.1 | 35.1  | 0.441  | -1.5 |
| 11/11/2017 11:12 AM | 6.8  | 4.6  | 7.7  | 13.2 | 33.1  | 0.353  | -1.5 |

|                     |     |      |     |      |      |        |      |
|---------------------|-----|------|-----|------|------|--------|------|
| 11/11/2017 11:13 AM | 6.9 | 5.3  | 9.3 | 14.2 | 30.6 | 0.218  | -1.5 |
| 11/11/2017 11:14 AM | 7   | 4.5  | 8.2 | 14.2 | 36.8 | 0.047  | -1.5 |
| 11/11/2017 11:15 AM | 7.1 | 5.3  | 7.8 | 14.1 | 31.6 | -0.041 | -1.5 |
| 11/11/2017 11:16 AM | 7   | 5.3  | 7.1 | 14.1 | 35.9 | -0.127 | -1.4 |
| 11/11/2017 11:17 AM | 6.6 | 4.5  | 5.8 | 14.1 | 43.8 | -0.193 | -1.5 |
| 11/11/2017 11:18 AM | 6.2 | 3.8  | 6.7 | 14.4 | 42.2 | -0.197 | -1.5 |
| 11/11/2017 11:19 AM | 5.7 | 2.8  | 5.4 | 14.9 | 48.1 | -0.166 | -1.5 |
| 11/11/2017 11:20 AM | 5.3 | 2.4  | 5.5 | 15.3 | 52   | -0.093 | -1.4 |
| 11/11/2017 11:21 AM | 5.1 | 3.9  | 4.6 | 15.1 | 51   | -0.150 | -1.1 |
| 11/11/2017 11:22 AM | 4.3 | 1    | 2.6 | 14.6 | 55.8 | -0.170 | -1.1 |
| 11/11/2017 11:23 AM | 3.2 | -1.9 | 1.6 | 13.9 | 47.6 | -0.160 | -1.4 |
| 11/11/2017 11:24 AM | 2.1 | -0.3 | 2   | 13.2 | 41.6 | 0.391  | -1.5 |
| 11/11/2017 11:25 AM | 1.7 | 0.4  | 2.4 | 12.7 | 36.3 | 3.492  | -1.5 |
| 11/11/2017 11:26 AM | 2   | 3.7  | 3.8 | 12.2 | 30   | 5.618  | -1.5 |
| 11/11/2017 11:27 AM | 2.5 | 0.1  | 3.6 | 11.8 | 25.4 | 6.905  | -1.5 |
| 11/11/2017 11:28 AM | 2.8 | 1.7  | 3.8 | 11.5 | 22.8 | 9.156  | -1.5 |
| 11/11/2017 11:29 AM | 2.9 | 1.7  | 3.8 | 11.3 | 19.4 | 8.433  | -1.5 |
| 11/11/2017 11:30 AM | 3.1 | 1    | 3.9 | 11.1 | 16.4 | 7.565  | -1.5 |
| 11/11/2017 11:31 AM | 3.3 | 3.7  | 4.6 | 10.8 | 14.2 | 7.968  | -1.5 |
| 11/11/2017 11:32 AM | 3.6 | 4.4  | 4.9 | 10.5 | 12.6 | 8.572  | -1.5 |
| 11/11/2017 11:33 AM | 4   | 3.6  | 5.9 | 10.1 | 11.3 | 10.081 | -1.5 |
| 11/11/2017 11:34 AM | 4.5 | 4.2  | 6.2 | 9.6  | 10.2 | 9.334  | -1.5 |
| 11/11/2017 11:35 AM | 5   | 4.2  | 6.1 | 9.3  | 9.5  | 8.676  | -1.5 |
| 11/11/2017 11:36 AM | 5.4 | 3.2  | 6.9 | 8.8  | 7.8  | 7.896  | -1.5 |
| 11/11/2017 11:37 AM | 5.5 | 4.8  | 6.9 | 8.4  | 7.5  | 9.362  | -1.5 |
| 11/11/2017 11:38 AM | 5.6 | 6.4  | 6.9 | 8    | 7.4  | 9.848  | -1.5 |
| 11/11/2017 11:39 AM | 6   | 5.6  | 7.3 | 7.7  | 6.6  | 10.291 | -1.5 |
| 11/11/2017 11:40 AM | 6.3 | 5.6  | 7.6 | 7.3  | 6.1  | 9.191  | -1.5 |
| 11/11/2017 11:41 AM | 6.5 | 4.9  | 7.5 | 7    | 5.8  | 9.282  | -1.5 |
| 11/11/2017 11:42 AM | 6.3 | 3    | 7.2 | 6.7  | 5.5  | 8.976  | -1.5 |
| 11/11/2017 11:43 AM | 6   | 4.2  | 6.2 | 6.4  | 5.4  | 9.221  | -1.5 |
| 11/11/2017 11:44 AM | 5.7 | 6.5  | 7.6 | 6.1  | 5.6  | 10.177 | -1.5 |
| 11/11/2017 11:45 AM | 6   | 4.1  | 8   | 6    | 5.6  | 10.748 | -1.5 |
| 11/11/2017 11:46 AM | 6.3 | 5.4  | 7.2 | 5.8  | 6.4  | 11.370 | -1.5 |
| 11/11/2017 11:47 AM | 6.2 | 4.4  | 6.9 | 5.8  | 6.5  | 12.028 | -1.5 |
| 11/11/2017 11:48 AM | 5.7 | 3.8  | 6.9 | 5.9  | 6.4  | 12.773 | -1.5 |
| 11/11/2017 11:49 AM | 5.2 | 4.4  | 6.5 | 6    | 5.9  | 11.856 | -1.5 |
| 11/11/2017 11:50 AM | 5.1 | 5    | 6.6 | 6    | 5.8  | 11.322 | -1.5 |
| 11/11/2017 11:51 AM | 5.1 | 4.7  | 6.7 | 6    | 6.3  | 12.961 | -1.5 |
| 11/11/2017 11:52 AM | 5.3 | 5.8  | 7.5 | 6    | 7.7  | 13.736 | -1.5 |
| 11/11/2017 11:53 AM | 5.4 | 3.9  | 7.2 | 6.1  | 7.7  | 12.908 | -1.5 |
| 11/11/2017 11:54 AM | 5.5 | 5.1  | 7.7 | 6.3  | 6.9  | 13.910 | -1.5 |
| 11/11/2017 11:55 AM | 5.8 | 6.3  | 7.9 | 6.5  | 6    | 12.278 | -1.5 |
| 11/11/2017 11:56 AM | 6   | 5.9  | 8   | 6.7  | 6.1  | 12.499 | -1.5 |
| 11/11/2017 11:57 AM | 6.2 | 4.8  | 7.3 | 6.7  | 5.7  | 11.821 | -1.5 |
| 11/11/2017 11:58 AM | 6   | 3.4  | 7.3 | 6.7  | 5.5  | 10.634 | -1.5 |
| 11/11/2017 11:59 AM | 5.9 | 4.4  | 7.6 | 6.6  | 4.9  | 9.472  | -1.5 |

|                     |      |      |      |      |      |        |      |
|---------------------|------|------|------|------|------|--------|------|
| 11/11/2017 12:00 PM | 5.9  | 5    | 7.5  | 6.4  | 4.8  | 9.387  | -1.5 |
| 11/11/2017 12:01 PM | 5.8  | 4    | 7.1  | 6    | 4.7  | 9.283  | -1.5 |
| 11/11/2017 12:02 PM | 5.6  | 4.5  | 6.9  | 5.7  | 4.9  | 9.346  | -1.5 |
| 11/11/2017 12:03 PM | 5.6  | 8.2  | 10.3 | 5.4  | 4.7  | 9.118  | -1.5 |
| 11/11/2017 12:04 PM | 8.9  | 14.4 | 18.3 | 5.2  | 4.5  | 7.863  | -1.5 |
| 11/11/2017 12:05 PM | 12.2 | 14.7 | 16.4 | 5    | 4.8  | 9.004  | -1.5 |
| 11/11/2017 12:06 PM | 14.6 | 10.9 | 13.5 | 4.8  | 4.9  | 7.840  | -1.5 |
| 11/11/2017 12:07 PM | 13.1 | 8.7  | 11.3 | 4.8  | 4.1  | 7.116  | -1.5 |
| 11/11/2017 12:08 PM | 10.9 | 6.8  | 9.4  | 4.8  | 7.1  | 6.585  | -1.5 |
| 11/11/2017 12:09 PM | 8    | 0.7  | 5.1  | 4.3  | 69.4 | 6.084  | -1.3 |
| 11/11/2017 12:10 PM | 5.4  | 1.8  | 5.4  | 4.5  | 75.6 | 4.764  | -1   |
| 11/11/2017 12:11 PM | 4.1  | 4.3  | 6.8  | 5.9  | 38.6 | 2.848  | -0.9 |
| 11/11/2017 12:12 PM | 5    | 6.8  | 11.8 | 8.3  | 21.3 | 1.497  | -1.5 |
| 11/11/2017 12:13 PM | 7.7  | 11.2 | 16.5 | 10.1 | 12.3 | 0.435  | -1.5 |
| 11/11/2017 12:14 PM | 10.7 | 12.8 | 16.7 | 10.1 | 5.7  | 0.131  | -1.4 |
| 11/11/2017 12:15 PM | 13.4 | 13.8 | 17.5 | 8.3  | 4    | -0.032 | -0.6 |
| 11/11/2017 12:16 PM | 14.7 | 12.3 | 16.3 | 6.2  | 11.6 | -0.018 | -0.9 |
| 11/11/2017 12:17 PM | 14.9 | 13.4 | 17.8 | 5.3  | 5.8  | -0.099 | -1.4 |
| 11/11/2017 12:18 PM | 14.7 | 12.9 | 18.8 | 5.3  | 4.4  | -0.087 | -1.5 |
| 11/11/2017 12:19 PM | 15.3 | 14.8 | 18.7 | 4.8  | 3.1  | 0.208  | -1.5 |
| 11/11/2017 12:20 PM | 16.2 | 15.1 | 18.6 | 3.9  | 2.1  | 0.191  | -1.5 |
| 11/11/2017 12:21 PM | 16.7 | 13.1 | 18.6 | 3    | 2    | 0.004  | -1.5 |
| 11/11/2017 12:22 PM | 16.9 | 15.7 | 17.9 | 2.3  | 1.9  | 1.257  | -1.5 |
| 11/11/2017 12:23 PM | 17.3 | 18.1 | 20.9 | 1.9  | 2    | 2.186  | -1.4 |
| 11/11/2017 12:24 PM | 18.1 | 17.1 | 20.1 | 1.7  | 2    | 1.328  | -1   |
| 11/11/2017 12:25 PM | 18.6 | 15.2 | 19.2 | 1.6  | 3.4  | 0.513  | -1.2 |
| 11/11/2017 12:26 PM | 18.5 | 16.3 | 18   | 1.9  | 5.5  | 0.158  | -1.4 |
| 11/11/2017 12:27 PM | 17.5 | 15.2 | 15.7 | 2.5  | 6.1  | 0.165  | -1.2 |
| 11/11/2017 12:28 PM | 15.8 | 10.4 | 12.8 | 2.8  | 9    | 0.140  | -1.2 |
| 11/11/2017 12:29 PM | 13.5 | 8.7  | 10.9 | 3    | 6.2  | 1.559  | -1.5 |
| 11/11/2017 12:30 PM | 11.1 | 7.9  | 10.2 | 3.2  | 7.1  | 8.035  | -1.5 |
| 11/11/2017 12:31 PM | 9.3  | 8.1  | 9.7  | 3.6  | 7.6  | 14.002 | -1.5 |
| 11/11/2017 12:32 PM | 8.2  | 6.4  | 9.4  | 4.1  | 8    | 18.990 | -1.5 |
| 11/11/2017 12:33 PM | 7.5  | 7.3  | 8.8  | 4.8  | 6.9  | 18.608 | -1.4 |
| 11/11/2017 12:34 PM | 7.2  | 5.2  | 8.9  | 5.5  | 6.1  | 15.413 | -1.5 |
| 11/11/2017 12:35 PM | 7.1  | 5.5  | 8.2  | 6.1  | 7.2  | 12.547 | -1.5 |
| 11/11/2017 12:36 PM | 7    | 3.5  | 7.8  | 6.4  | 6.4  | 11.398 | -1.5 |
| 11/11/2017 12:37 PM | 6.6  | 3.4  | 7.2  | 6.4  | 6.1  | 12.157 | -1.5 |
| 11/11/2017 12:38 PM | 5.8  | 4.1  | 6.5  | 6.4  | 7.2  | 12.807 | -1.5 |
| 11/11/2017 12:39 PM | 5.5  | 8.6  | 11.2 | 6.3  | 7.4  | 15.090 | -1.5 |
| 11/11/2017 12:40 PM | 7.8  | 18   | 18.7 | 6.4  | 6.5  | 28.307 | -1.5 |
| 11/11/2017 12:41 PM | 11.6 | 19.1 | 19.8 | 6.7  | 4.4  | 26.983 | -1.5 |
| 11/11/2017 12:42 PM | 15.6 | 22   | 22.9 | 7.2  | 3.1  | 14.332 | -1.5 |
| 11/11/2017 12:43 PM | 17   | 17.8 | 17.9 | 7.5  | 2.4  | 9.436  | -1.5 |
| 11/11/2017 12:44 PM | 16.5 | 15.9 | 15.3 | 7.1  | 1.9  | 6.172  | -1.5 |
| 11/11/2017 12:45 PM | 15.5 | 14.3 | 15.5 | 6.3  | 1.7  | 3.940  | -1.5 |
| 11/11/2017 12:46 PM | 15   | 16.7 | 16   | 5.2  | 1.8  | 2.216  | -1.5 |



|                     |      |      |      |     |     |        |      |
|---------------------|------|------|------|-----|-----|--------|------|
| 11/11/2017 12:47 PM | 15.1 | 14   | 15.1 | 4.1 | 2.1 | 1.423  | -1.5 |
| 11/11/2017 12:48 PM | 14.7 | 11.2 | 12.9 | 3.1 | 2.1 | 1.230  | -1.5 |
| 11/11/2017 12:49 PM | 13.5 | 12   | 12   | 2.4 | 2.4 | 0.951  | -1.5 |
| 11/11/2017 12:50 PM | 11.7 | 6.1  | 10.3 | 1.8 | 2.6 | 0.860  | -1.5 |
| 11/11/2017 12:51 PM | 10.2 | 8    | 9.6  | 1.4 | 2.4 | 0.764  | -1.5 |
| 11/11/2017 12:52 PM | 9    | 5.7  | 9.3  | 1.2 | 2.7 | 0.631  | -1.5 |
| 11/11/2017 12:53 PM | 8.3  | 6.9  | 9.3  | 1   | 2.7 | 0.507  | -1.5 |
| 11/11/2017 12:54 PM | 8    | 7.1  | 9.1  | 1   | 2.7 | 0.383  | -1.5 |
| 11/11/2017 12:55 PM | 7.7  | 4.7  | 8.1  | 0.9 | 3   | 0.340  | -1.5 |
| 11/11/2017 12:56 PM | 7.3  | 3.2  | 7.8  | 0.9 | 3   | 0.277  | -1.5 |
| 11/11/2017 12:57 PM | 6.6  | 5    | 7.2  | 0.9 | 3.3 | 0.230  | -1.5 |
| 11/11/2017 12:58 PM | 6.1  | 5.9  | 7.2  | 0.9 | 3.2 | 0.174  | -1.5 |
| 11/11/2017 12:59 PM | 5.9  | 4.2  | 7.4  | 0.9 | 3.5 | 0.126  | -1.5 |
| 11/11/2017 1:00 PM  | 5.9  | 3.2  | 7.1  | 1   | 3.5 | 0.088  | -1.5 |
| 11/11/2017 1:01 PM  | 5.8  | 3.7  | 7.1  | 1   | 4.4 | 0.041  | -1.5 |
| 11/11/2017 1:02 PM  | 5.8  | 4.8  | 7.3  | 1   | 4.7 | 0.012  | -1.5 |
| 11/11/2017 1:03 PM  | 5.8  | 3    | 7.2  | 1   | 5.4 | -0.026 | -1.5 |
| 11/11/2017 1:04 PM  | 5.8  | 4.1  | 6.7  | 1.1 | 5.9 | -0.057 | -1.5 |
| 11/11/2017 1:05 PM  | 5.7  | 4.5  | 7.5  | 1.3 | 5.4 | -0.012 | -1.5 |
| 11/11/2017 1:06 PM  | 5.8  | 4.4  | 7.9  | 1.5 | 5   | 0.296  | -1.5 |
| 11/11/2017 1:07 PM  | 6.2  | 4.2  | 8.2  | 1.7 | 4.6 | 0.164  | -1.5 |
| 11/11/2017 1:08 PM  | 6.6  | 4.8  | 8.7  | 1.7 | 4.2 | 0.090  | -1.5 |
| 11/11/2017 1:09 PM  | 6.9  | 4.3  | 8.9  | 1.7 | 3.9 | 0.046  | -1.5 |
| 11/11/2017 1:10 PM  | 7    | 4    | 8.1  | 1.6 | 3.8 | -0.002 | -1.5 |
| 11/11/2017 1:11 PM  | 6.8  | 4.9  | 7.8  | 1.4 | 3.5 | -0.043 | -1.5 |
| 11/11/2017 1:12 PM  | 6.5  | 2.9  | 8.2  | 1.3 | 3.4 | -0.061 | -1.5 |
| 11/11/2017 1:13 PM  | 6.3  | 4.1  | 7.7  | 1.2 | 3.4 | -0.087 | -1.5 |
| 11/11/2017 1:14 PM  | 6.1  | 4.1  | 7.7  | 1.1 | 3.4 | -0.114 | -1.5 |
| 11/11/2017 1:15 PM  | 6    | 2.6  | 7.4  | 1   | 3.5 | -0.116 | -1.5 |
| 11/11/2017 1:16 PM  | 5.9  | 4    | 8.5  | 0.9 | 3.6 | -0.143 | -1.5 |
| 11/11/2017 1:17 PM  | 7.6  | 11.1 | 12.8 | 0.9 | 2.9 | -0.210 | -1.5 |
| 11/11/2017 1:18 PM  | 8.9  | 5.3  | 10.7 | 0.8 | 2.9 | -0.207 | -1.5 |
| 11/11/2017 1:19 PM  | 9.7  | 4.3  | 8.9  | 0.7 | 3.2 | -0.211 | -1.5 |
| 11/11/2017 1:20 PM  | 8.4  | 4.8  | 8.4  | 0.7 | 3.1 | -0.204 | -1.5 |
| 11/11/2017 1:21 PM  | 7.3  | 4.3  | 7.9  | 0.6 | 3.1 | -0.216 | -1.5 |
| 11/11/2017 1:22 PM  | 6.7  | 4.3  | 7.9  | 0.6 | 3.6 | -0.213 | -1.5 |
| 11/11/2017 1:23 PM  | 6.3  | 3.2  | 7.5  | 0.5 | 3.5 | -0.216 | -1.5 |
| 11/11/2017 1:24 PM  | 6.1  | 3.7  | 7.5  | 0.5 | 3.4 | -0.245 | -1.5 |
| 11/11/2017 1:25 PM  | 5.9  | 4    | 7.4  | 0.5 | 3.8 | -0.236 | -1.5 |
| 11/11/2017 1:26 PM  | 5.7  | 3.1  | 7.3  | 0.5 | 3.5 | -0.235 | -1.5 |
| 11/11/2017 1:27 PM  | 5.5  | 4.5  | 7.4  | 0.5 | 3.2 | -0.254 | -1.5 |
| 11/11/2017 1:28 PM  | 5.5  | 3.9  | 7.7  | 0.5 | 3.4 | -0.244 | -1.5 |
| 11/11/2017 1:29 PM  | 5.7  | 4.9  | 7.9  | 0.4 | 3.7 | -0.240 | -1.5 |
| 11/11/2017 1:30 PM  | 5.9  | 2.8  | 7.3  | 0.4 | 3.9 | -0.259 | -1.5 |
| 11/11/2017 1:31 PM  | 5.6  | 2.7  | 6.6  | 0.5 | 4.2 | -0.249 | -1.5 |
| 11/11/2017 1:32 PM  | 5.2  | 2    | 7    | 0.5 | 4.2 | -0.247 | -1.5 |
| 11/11/2017 1:33 PM  | 4.9  | 3.1  | 7.1  | 0.5 | 4.1 | -0.263 | -1.5 |

|                    |      |      |      |      |     |        |      |
|--------------------|------|------|------|------|-----|--------|------|
| 11/11/2017 1:34 PM | 5    | 2.9  | 7.4  | 0.5  | 4.2 | -0.267 | -1.5 |
| 11/11/2017 1:35 PM | 5.1  | 2.2  | 7.3  | 0.5  | 4   | -0.259 | -1.5 |
| 11/11/2017 1:36 PM | 5.2  | 2    | 6.9  | 0.5  | 4.1 | -0.259 | -1.5 |
| 11/11/2017 1:37 PM | 5.1  | 3.4  | 7.1  | 0.5  | 4   | -0.274 | -1.5 |
| 11/11/2017 1:38 PM | 5.1  | 4.2  | 7.2  | 0.5  | 3.6 | -0.265 | -1.5 |
| 11/11/2017 1:39 PM | 5.1  | 3.5  | 7.3  | 0.5  | 3.7 | -0.271 | -1.5 |
| 11/11/2017 1:40 PM | 5.2  | 4.1  | 7.6  | 0.5  | 3.7 | -0.283 | -1.5 |
| 11/11/2017 1:41 PM | 7    | 13.3 | 17   | 0.5  | 2.6 | -0.282 | -1.5 |
| 11/11/2017 1:42 PM | 10.8 | 14.3 | 17.9 | 0.4  | 2.2 | -0.284 | -1.5 |
| 11/11/2017 1:43 PM | 14.5 | 14.4 | 17.9 | 0.4  | 2   | -0.294 | -1.5 |
| 11/11/2017 1:44 PM | 16.9 | 18.4 | 18.9 | 0.4  | 1.6 | -0.297 | -1.5 |
| 11/11/2017 1:45 PM | 17.5 | 15.8 | 19.1 | 0.3  | 1.8 | -0.289 | -1.5 |
| 11/11/2017 1:46 PM | 18.1 | 16.8 | 18.4 | 0.2  | 2   | -0.307 | -1.5 |
| 11/11/2017 1:47 PM | 17.4 | 11.5 | 14.2 | 0.1  | 1.9 | -0.303 | -1.5 |
| 11/11/2017 1:48 PM | 15.2 | 6.7  | 11.1 | 0.1  | 2.3 | -0.291 | -1.5 |
| 11/11/2017 1:49 PM | 12   | 6.8  | 9.5  | 0    | 2.8 | -0.296 | -1.5 |
| 11/11/2017 1:50 PM | 9.3  | 5.7  | 8.5  | 0    | 3.1 | -0.307 | -1.5 |
| 11/11/2017 1:51 PM | 7.7  | 4.9  | 8.4  | 0    | 3.1 | -0.292 | -1.5 |
| 11/11/2017 1:52 PM | 7.6  | 6.1  | 10.8 | 0.1  | 3   | -0.293 | -1.5 |
| 11/11/2017 1:53 PM | 7.8  | 6    | 8.9  | 0.1  | 3   | -0.303 | -1.5 |
| 11/11/2017 1:54 PM | 7.8  | 5.3  | 8.1  | 0.1  | 3   | -0.291 | -1.5 |
| 11/11/2017 1:55 PM | 7.1  | 4.9  | 7.9  | 0.1  | 3.5 | -0.293 | -1.5 |
| 11/11/2017 1:56 PM | 6.4  | 3.8  | 7.3  | 0.2  | 3.5 | -0.303 | -1.5 |
| 11/11/2017 1:57 PM | 5.8  | 2.3  | 6.5  | 0.2  | 3.8 | -0.296 | -1.5 |
| 11/11/2017 1:58 PM | 5.2  | 3.3  | 6    | 0.2  | 4   | -0.289 | -1.5 |
| 11/11/2017 1:59 PM | 4.7  | 1.8  | 6.2  | 0.2  | 4   | -0.295 | -1.5 |
| 11/11/2017 2:00 PM | 4.5  | 2.2  | 6.4  | 0.2  | 4.2 | -0.299 | -1.5 |
| 11/11/2017 2:01 PM | 4.5  | 2.8  | 7    | 0.2  | 4.1 | -0.287 | -1.5 |
| 11/11/2017 2:02 PM | 4.7  | 4.3  | 7    | 0.2  | 4.1 | -0.295 | -1.5 |
| 11/11/2017 2:03 PM | 4.9  | 3.1  | 6.7  | 0.3  | 4.1 | -0.297 | -1.5 |
| 11/11/2017 2:04 PM | 4.8  | 2.4  | 6.1  | 0.3  | 4.3 | -0.286 | -1.5 |
| 11/11/2017 2:05 PM | 4.5  | 2.9  | 6.3  | 0.3  | 4.4 | -0.295 | -1.5 |
| 11/11/2017 2:06 PM | 4.2  | 3.3  | 6.4  | 0.3  | 4.4 | -0.295 | -1.5 |
| 11/11/2017 2:07 PM | 4.1  | 1.8  | 6.1  | 0.4  | 4.4 | -0.284 | -1.5 |
| 11/11/2017 2:08 PM | 4.1  | 3    | 6.3  | 0.3  | 4.3 | -0.290 | -1.5 |
| 11/11/2017 2:09 PM | 4.1  | 1.3  | 6.4  | 0.3  | 4.6 | -0.293 | -1.5 |
| 11/11/2017 2:10 PM | 4.2  | 2.6  | 6.8  | 0.3  | 4.5 | -0.293 | -1.5 |
| 11/11/2017 2:11 PM | 4.5  | 1.6  | 7.2  | 0.3  | 4   | -0.292 | -1.5 |
| 11/11/2017 2:12 PM | 5    | 4.1  | 8.7  | 0.2  | 4.1 | -0.298 | -1.5 |
| 11/11/2017 2:13 PM | 8.4  | 20.7 | 23.7 | 0.2  | 2   | -0.298 | -1.5 |
| 11/11/2017 2:14 PM | 14.1 | 19.9 | 22.4 | 0.2  | 1.4 | -0.297 | -1.5 |
| 11/11/2017 2:15 PM | 19.7 | 20.8 | 23.2 | 0.1  | 1.5 | -0.301 | -1.5 |
| 11/11/2017 2:16 PM | 21.8 | 19   | 20.7 | 0    | 2   | -0.313 | -1.5 |
| 11/11/2017 2:17 PM | 20.9 | 15.9 | 19.6 | -0.2 | 1.7 | -0.304 | -1.5 |
| 11/11/2017 2:18 PM | 19.6 | 14.8 | 18.9 | -0.3 | 1.9 | -0.306 | -1.5 |
| 11/11/2017 2:19 PM | 18.7 | 18.5 | 20   | -0.4 | 1.9 | -0.309 | -1.5 |
| 11/11/2017 2:20 PM | 19.1 | 17.9 | 21.4 | -0.5 | 1.7 | -0.306 | -1.5 |

|                    |      |      |      |      |      |        |      |
|--------------------|------|------|------|------|------|--------|------|
| 11/11/2017 2:21 PM | 20.1 | 19.5 | 22.4 | -0.5 | 1.8  | -0.311 | -1.5 |
| 11/11/2017 2:22 PM | 21.5 | 21.7 | 23.1 | -0.5 | 2.1  | -0.317 | -1.5 |
| 11/11/2017 2:23 PM | 22.4 | 21   | 23.9 | -0.5 | 2.4  | -0.313 | -1.5 |
| 11/11/2017 2:24 PM | 23   | 21.7 | 23.1 | -0.5 | 1.9  | -0.124 | -1.5 |
| 11/11/2017 2:25 PM | 22.9 | 19.5 | 22   | -0.4 | 4    | -0.069 | -1.5 |
| 11/11/2017 2:26 PM | 20.9 | 15.6 | 16.4 | -0.3 | 24.2 | -0.244 | -1.5 |
| 11/11/2017 2:27 PM | 19   | 17.2 | 19.6 | 0.7  | 6.9  | -0.285 | -1.5 |
| 11/11/2017 2:28 PM | 18.7 | 21.8 | 22.5 | 2    | 2.1  | -0.313 | -1.5 |

## Tallgrass Prairie November 2017

| Date&Time       | O3 NO-CL | O3 UV-C-H | O3 UV-C | NO2-C | NO   | CO    | THC   |
|-----------------|----------|-----------|---------|-------|------|-------|-------|
| 11/13/2017 0:00 | 20.97    | 18.73     | 22.01   | -0.81 | 1.32 | 0.054 | 1.311 |
| 11/13/2017 0:01 | 20.78    | 18.79     | 21.25   | -0.63 | 1.28 | 0.050 | 1.319 |
| 11/13/2017 0:02 | 20.80    | 18.81     | 20.34   | -0.71 | 1.18 | 0.060 | 1.318 |
| 11/13/2017 0:03 | 20.50    | 17.48     | 20.79   | -0.35 | 1.73 | 0.052 | 1.315 |
| 11/13/2017 0:04 | 19.98    | 18.08     | 19.94   | -0.31 | 1.49 | 0.049 | 1.320 |
| 11/13/2017 0:05 | 19.80    | 17.84     | 20.66   | -0.85 | 1.09 | 0.061 | 1.323 |
| 11/13/2017 0:06 | 19.92    | 18.09     | 20.88   | -0.61 | 1.30 | 0.057 | 1.301 |
| 11/13/2017 0:07 | 20.12    | 17.58     | 20.87   | -0.65 | 0.97 | 0.057 | 1.301 |
| 11/13/2017 0:08 | 20.57    | 20.79     | 22.18   | -0.91 | 0.91 | 0.063 | 1.288 |
| 11/13/2017 0:09 | 20.73    | 19.19     | 21.60   | -0.93 | 1.03 | 0.051 | 1.275 |
| 11/13/2017 0:10 | 20.93    | 18.79     | 21.36   | -0.93 | 1.29 | 0.068 | 1.297 |
| 11/13/2017 0:11 | 20.53    | 18.55     | 20.57   | -0.92 | 1.07 | 0.054 | 1.302 |
| 11/13/2017 0:12 | 19.95    | 17.20     | 19.98   | -0.86 | 1.05 | 0.045 | 1.304 |
| 11/13/2017 0:13 | 19.48    | 18.86     | 20.38   | -0.92 | 1.23 | 0.056 | 1.294 |
| 11/13/2017 0:14 | 19.60    | 18.30     | 20.58   | -0.83 | 1.07 | 0.060 | 1.289 |
| 11/13/2017 0:15 | 19.73    | 18.39     | 20.29   | -0.51 | 1.42 | 0.061 | 1.293 |
| 11/13/2017 0:16 | 19.72    | 16.98     | 19.63   | -0.03 | 1.55 | 0.064 | 1.305 |
| 11/13/2017 0:17 | 19.30    | 17.88     | 19.84   | 0.65  | 1.76 | 0.053 | 1.315 |
| 11/13/2017 0:18 | 19.02    | 19.37     | 19.75   | 0.20  | 1.67 | 0.056 | 1.303 |
| 11/13/2017 0:19 | 19.00    | 18.91     | 20.24   | -0.17 | 1.04 | 0.060 | 1.293 |
| 11/13/2017 0:20 | 19.32    | 19.11     | 20.39   | 0.10  | 1.71 | 0.055 | 1.285 |
| 11/13/2017 0:21 | 19.55    | 18.10     | 20.08   | -0.06 | 1.23 | 0.050 | 1.289 |
| 11/13/2017 0:22 | 19.42    | 18.25     | 20.13   | 0.45  | 1.81 | 0.059 | 1.298 |
| 11/13/2017 0:23 | 19.33    | 17.72     | 20.56   | 0.28  | 1.54 | 0.046 | 1.308 |
| 11/13/2017 0:24 | 19.30    | 20.15     | 20.55   | -0.27 | 1.30 | 0.056 | 1.307 |
| 11/13/2017 0:25 | 19.72    | 19.74     | 20.74   | -0.19 | 1.37 | 0.061 | 1.286 |
| 11/13/2017 0:26 | 20.00    | 18.45     | 20.95   | -0.42 | 1.20 | 0.047 | 1.274 |
| 11/13/2017 0:27 | 20.47    | 19.38     | 21.66   | -0.86 | 1.10 | 0.057 | 1.284 |
| 11/13/2017 0:28 | 20.52    | 18.59     | 20.79   | -0.65 | 1.40 | 0.054 | 1.287 |
| 11/13/2017 0:29 | 20.60    | 20.77     | 21.66   | 0.09  | 1.98 | 0.048 | 1.290 |
| 11/13/2017 0:30 | 20.53    | 19.22     | 21.00   | -0.03 | 2.04 | 0.056 | 1.289 |
| 11/13/2017 0:31 | 20.35    | 18.92     | 20.79   | 0.26  | 1.52 | 0.048 | 1.293 |
| 11/13/2017 0:32 | 20.23    | 17.31     | 20.64   | -0.65 | 1.09 | 0.053 | 1.295 |
| 11/13/2017 0:33 | 20.05    | 18.47     | 20.82   | -0.94 | 1.16 | 0.059 | 1.313 |
| 11/13/2017 0:34 | 20.12    | 19.44     | 20.80   | -0.71 | 1.31 | 0.047 | 1.314 |
| 11/13/2017 0:35 | 20.20    | 19.98     | 21.42   | -0.31 | 1.56 | 0.050 | 1.294 |
| 11/13/2017 0:36 | 20.65    | 19.57     | 22.27   | -0.87 | 1.07 | 0.056 | 1.289 |
| 11/13/2017 0:37 | 20.98    | 18.18     | 21.18   | -0.79 | 1.03 | 0.046 | 1.280 |
| 11/13/2017 0:38 | 20.95    | 17.68     | 20.69   | -0.49 | 1.26 | 0.053 | 1.260 |
| 11/13/2017 0:39 | 20.35    | 17.39     | 20.15   | -0.50 | 1.10 | 0.056 | 1.265 |
| 11/13/2017 0:40 | 20.00    | 19.73     | 21.03   | -0.84 | 0.91 | 0.042 | 1.263 |
| 11/13/2017 0:41 | 20.15    | 19.43     | 21.16   | -0.72 | 1.17 | 0.055 | 1.278 |
| 11/13/2017 0:42 | 20.47    | 18.58     | 21.48   | -0.89 | 1.15 | 0.052 | 1.286 |
| 11/13/2017 0:43 | 20.73    | 19.84     | 21.54   | -0.65 | 1.52 | 0.044 | 1.279 |
| 11/13/2017 0:44 | 20.70    | 18.66     | 21.51   | -1.03 | 1.15 | 0.057 | 1.286 |

|                 |       |       |       |       |      |       |       |
|-----------------|-------|-------|-------|-------|------|-------|-------|
| 11/13/2017 0:45 | 20.67 | 18.04 | 21.23 | -0.69 | 1.73 | 0.045 | 1.284 |
| 11/13/2017 0:46 | 20.37 | 18.98 | 20.67 | -0.48 | 1.42 | 0.048 | 1.273 |
| 11/13/2017 0:47 | 20.02 | 18.48 | 20.42 | -0.60 | 1.82 | 0.058 | 1.278 |
| 11/13/2017 0:48 | 19.73 | 18.12 | 20.67 | -0.35 | 1.32 | 0.043 | 1.285 |
| 11/13/2017 0:49 | 19.70 | 17.48 | 20.64 | -0.68 | 1.43 | 0.054 | 1.282 |
| 11/13/2017 0:50 | 19.67 | 17.72 | 20.21 | -0.60 | 1.08 | 0.054 | 1.280 |
| 11/13/2017 0:51 | 19.70 | 18.43 | 20.42 | -0.98 | 0.79 | 0.036 | 1.286 |
| 11/13/2017 0:52 | 19.65 | 18.32 | 20.20 | -0.98 | 0.98 | 0.060 | 1.285 |
| 11/13/2017 0:53 | 19.53 | 18.28 | 19.83 | -0.98 | 1.22 | 0.043 | 1.281 |
| 11/13/2017 0:54 | 19.27 | 18.17 | 20.69 | -0.73 | 1.32 | 0.048 | 1.299 |
| 11/13/2017 0:55 | 19.53 | 19.08 | 21.31 | -0.72 | 1.40 | 0.056 | 1.320 |
| 11/13/2017 0:56 | 19.95 | 21.23 | 21.19 | -0.09 | 1.44 | 0.044 | 1.302 |
| 11/13/2017 0:57 | 20.65 | 19.16 | 21.95 | -0.75 | 1.11 | 0.055 | 1.293 |
| 11/13/2017 0:58 | 20.80 | 20.12 | 21.33 | -1.15 | 1.00 | 0.060 | 1.303 |
| 11/13/2017 0:59 | 20.73 | 19.28 | 20.47 | 0.09  | 2.39 | 0.037 | 1.294 |
| 11/13/2017 1:00 | 20.25 | 18.63 | 20.52 | 0.60  | 1.72 | 0.057 | 1.301 |
| 11/13/2017 1:01 | 19.92 | 19.73 | 20.68 | -0.75 | 1.64 | 0.049 | 1.299 |
| 11/13/2017 1:02 | 19.97 | 19.33 | 21.30 | -1.11 | 0.93 | 0.048 | 1.284 |
| 11/13/2017 1:03 | 20.32 | 19.09 | 21.13 | -1.11 | 0.91 | 0.051 | 1.280 |
| 11/13/2017 1:04 | 20.50 | 19.71 | 21.28 | -0.43 | 1.34 | 0.037 | 1.278 |
| 11/13/2017 1:05 | 20.58 | 19.50 | 21.56 | -0.87 | 1.03 | 0.048 | 1.284 |
| 11/13/2017 1:06 | 20.42 | 19.23 | 20.56 | -0.97 | 0.87 | 0.060 | 1.301 |
| 11/13/2017 1:07 | 20.28 | 18.40 | 21.02 | -0.79 | 0.88 | 0.040 | 1.317 |
| 11/13/2017 1:08 | 20.03 | 17.74 | 20.32 | -0.91 | 1.13 | 0.048 | 1.320 |
| 11/13/2017 1:09 | 19.87 | 18.63 | 20.48 | -0.86 | 0.85 | 0.045 | 1.329 |
| 11/13/2017 1:10 | 19.85 | 18.58 | 20.85 | -0.84 | 0.76 | 0.042 | 1.332 |
| 11/13/2017 1:11 | 19.90 | 18.88 | 20.38 | -0.68 | 0.96 | 0.047 | 1.318 |
| 11/13/2017 1:12 | 19.72 | 18.74 | 19.73 | -0.62 | 1.44 | 0.047 | 1.325 |
| 11/13/2017 1:13 | 19.45 | 17.56 | 20.10 | -0.68 | 1.08 | 0.040 | 1.323 |
| 11/13/2017 1:14 | 19.22 | 20.42 | 20.79 | -0.58 | 1.36 | 0.051 | 1.312 |
| 11/13/2017 1:15 | 19.63 | 17.93 | 21.60 | -0.80 | 1.05 | 0.044 | 1.307 |
| 11/13/2017 1:16 | 19.98 | 18.08 | 20.91 | -0.70 | 1.06 | 0.046 | 1.313 |
| 11/13/2017 1:17 | 20.30 | 17.93 | 21.20 | -0.70 | 0.95 | 0.054 | 1.309 |
| 11/13/2017 1:18 | 20.40 | 20.00 | 21.76 | -0.72 | 0.69 | 0.040 | 1.318 |
| 11/13/2017 1:19 | 20.75 | 19.07 | 22.29 | -0.69 | 1.25 | 0.055 | 1.311 |
| 11/13/2017 1:20 | 21.00 | 18.73 | 21.41 | -0.74 | 1.07 | 0.048 | 1.300 |
| 11/13/2017 1:21 | 20.97 | 18.69 | 21.84 | -0.07 | 1.39 | 0.043 | 1.322 |
| 11/13/2017 1:22 | 20.92 | 20.73 | 21.86 | -0.06 | 2.22 | 0.057 | 1.338 |
| 11/13/2017 1:23 | 20.97 | 18.85 | 21.88 | -0.05 | 2.06 | 0.046 | 1.347 |
| 11/13/2017 1:24 | 21.13 | 18.63 | 21.63 | 0.08  | 1.22 | 0.043 | 1.344 |
| 11/13/2017 1:25 | 20.88 | 19.30 | 21.21 | 1.84  | 3.53 | 0.058 | 1.348 |
| 11/13/2017 1:26 | 20.55 | 19.34 | 20.75 | 0.01  | 1.76 | 0.041 | 1.331 |
| 11/13/2017 1:27 | 20.32 | 18.26 | 21.29 | -0.57 | 1.11 | 0.044 | 1.348 |
| 11/13/2017 1:28 | 20.17 | 19.21 | 20.82 | -0.99 | 1.16 | 0.052 | 1.354 |
| 11/13/2017 1:29 | 20.12 | 19.63 | 20.95 | -0.92 | 0.85 | 0.036 | 1.363 |
| 11/13/2017 1:30 | 20.15 | 18.90 | 21.08 | -0.97 | 0.81 | 0.050 | 1.354 |
| 11/13/2017 1:31 | 20.22 | 17.63 | 20.72 | -0.92 | 1.01 | 0.045 | 1.344 |

|                 |       |       |       |       |      |       |       |
|-----------------|-------|-------|-------|-------|------|-------|-------|
| 11/13/2017 1:32 | 20.30 | 18.61 | 20.68 | -0.99 | 0.85 | 0.042 | 1.346 |
| 11/13/2017 1:33 | 20.12 | 18.81 | 20.45 | -1.03 | 0.80 | 0.051 | 1.351 |
| 11/13/2017 1:34 | 19.93 | 18.57 | 20.00 | -0.70 | 1.29 | 0.042 | 1.344 |
| 11/13/2017 1:35 | 19.70 | 17.56 | 20.60 | -0.94 | 1.29 | 0.046 | 1.332 |
| 11/13/2017 1:36 | 19.67 | 17.98 | 20.17 | -0.23 | 1.64 | 0.045 | 1.335 |
| 11/13/2017 1:37 | 19.70 | 19.13 | 20.46 | -0.20 | 1.56 | 0.032 | 1.336 |
| 11/13/2017 1:38 | 19.72 | 18.47 | 20.47 | 0.32  | 2.21 | 0.053 | 1.355 |
| 11/13/2017 1:39 | 19.72 | 17.93 | 20.69 | 0.26  | 2.12 | 0.045 | 1.319 |
| 11/13/2017 1:40 | 20.05 | 19.65 | 21.54 | -0.38 | 1.18 | 0.045 | 1.300 |
| 11/13/2017 1:41 | 20.50 | 19.67 | 22.05 | -1.02 | 0.87 | 0.054 | 1.308 |
| 11/13/2017 1:42 | 20.95 | 19.83 | 21.83 | -1.04 | 0.80 | 0.034 | 1.313 |
| 11/13/2017 1:43 | 21.25 | 19.84 | 22.20 | -0.83 | 1.07 | 0.054 | 1.341 |
| 11/13/2017 1:44 | 21.40 | 20.12 | 22.62 | -1.09 | 0.96 | 0.048 | 1.344 |
| 11/13/2017 1:45 | 21.58 | 21.43 | 22.63 | -1.13 | 1.18 | 0.040 | 1.332 |
| 11/13/2017 1:46 | 21.70 | 19.96 | 22.79 | -1.22 | 1.01 | 0.050 | 1.334 |
| 11/13/2017 1:47 | 21.97 | 20.57 | 22.63 | -1.20 | 0.97 | 0.045 | 1.320 |
| 11/13/2017 1:48 | 21.87 | 18.90 | 21.53 | -1.24 | 0.91 | 0.046 | 1.338 |
| 11/13/2017 1:49 | 21.53 | 18.56 | 21.52 | -1.17 | 0.97 | 0.051 | 1.333 |
| 11/13/2017 1:50 | 21.25 | 20.78 | 22.26 | -1.17 | 0.83 | 0.037 | 1.338 |
| 11/13/2017 1:51 | 21.37 | 20.15 | 22.61 | -1.17 | 0.72 | 0.047 | 1.329 |
| 11/13/2017 1:52 | 21.85 | 20.89 | 23.57 | -1.02 | 1.17 | 0.048 | 1.347 |
| 11/13/2017 1:53 | 22.18 | 21.39 | 23.46 | -0.91 | 0.94 | 0.039 | 1.335 |
| 11/13/2017 1:54 | 22.45 | 20.88 | 23.29 | -0.91 | 0.95 | 0.047 | 1.309 |
| 11/13/2017 1:55 | 22.60 | 21.88 | 23.01 | -1.00 | 0.99 | 0.042 | 1.318 |
| 11/13/2017 1:56 | 22.50 | 20.48 | 22.75 | -0.98 | 1.18 | 0.039 | 1.326 |
| 11/13/2017 1:57 | 22.00 | 20.31 | 21.98 | -0.93 | 1.16 | 0.042 | 1.324 |
| 11/13/2017 1:58 | 21.53 | 20.43 | 21.85 | -0.89 | 1.18 | 0.034 | 1.339 |
| 11/13/2017 1:59 | 21.22 | 19.07 | 22.05 | -1.03 | 1.00 | 0.042 | 1.348 |
| 11/13/2017 2:00 | 21.23 | 20.10 | 21.88 | -0.84 | 1.56 | 0.048 | 1.329 |
| 11/13/2017 2:01 | 20.97 | 19.40 | 21.04 | -0.09 | 2.23 | 0.039 | 1.320 |
| 11/13/2017 2:02 | 20.62 | 18.57 | 21.21 | -0.14 | 1.99 | 0.047 | 1.315 |
| 11/13/2017 2:03 | 20.42 | 18.64 | 20.98 | 0.44  | 2.46 | 0.043 | 1.314 |
| 11/13/2017 2:04 | 20.40 | 19.47 | 21.51 | -0.41 | 1.43 | 0.039 | 1.316 |
| 11/13/2017 2:05 | 20.53 | 18.99 | 20.67 | -0.70 | 1.44 | 0.048 | 1.298 |
| 11/13/2017 2:06 | 20.37 | 18.15 | 21.00 | -0.85 | 1.44 | 0.042 | 1.334 |
| 11/13/2017 2:07 | 20.30 | 19.03 | 20.81 | -0.75 | 1.22 | 0.042 | 1.350 |
| 11/13/2017 2:08 | 20.15 | 18.12 | 20.89 | -0.44 | 1.52 | 0.056 | 1.338 |
| 11/13/2017 2:09 | 20.22 | 19.74 | 21.43 | -0.05 | 1.90 | 0.039 | 1.321 |
| 11/13/2017 2:10 | 20.45 | 18.77 | 22.11 | -0.70 | 1.20 | 0.037 | 1.315 |
| 11/13/2017 2:11 | 21.10 | 21.90 | 22.86 | -0.89 | 1.30 | 0.043 | 1.298 |
| 11/13/2017 2:12 | 21.95 | 21.60 | 23.83 | -0.98 | 1.15 | 0.036 | 1.293 |
| 11/13/2017 2:13 | 22.48 | 18.79 | 22.71 | -0.88 | 1.22 | 0.047 | 1.267 |
| 11/13/2017 2:14 | 22.35 | 21.14 | 22.35 | -0.75 | 1.25 | 0.045 | 1.284 |
| 11/13/2017 2:15 | 21.95 | 20.66 | 22.67 | -0.62 | 1.15 | 0.039 | 1.307 |
| 11/13/2017 2:16 | 21.77 | 20.17 | 22.53 | -0.65 | 1.24 | 0.045 | 1.302 |
| 11/13/2017 2:17 | 21.82 | 18.65 | 22.64 | -0.91 | 1.14 | 0.039 | 1.310 |
| 11/13/2017 2:18 | 21.67 | 20.15 | 21.62 | -0.68 | 1.32 | 0.040 | 1.322 |

|                 |       |       |       |       |      |       |       |
|-----------------|-------|-------|-------|-------|------|-------|-------|
| 11/13/2017 2:19 | 21.35 | 19.44 | 21.97 | -0.38 | 1.27 | 0.049 | 1.330 |
| 11/13/2017 2:20 | 21.38 | 20.89 | 22.93 | -0.67 | 1.53 | 0.033 | 1.328 |
| 11/13/2017 2:21 | 21.65 | 19.91 | 22.80 | -0.18 | 1.89 | 0.042 | 1.363 |
| 11/13/2017 2:22 | 21.98 | 21.46 | 23.02 | -0.66 | 1.40 | 0.048 | 1.368 |
| 11/13/2017 2:23 | 22.12 | 20.86 | 23.13 | -0.61 | 1.25 | 0.036 | 1.343 |
| 11/13/2017 2:24 | 22.20 | 20.39 | 22.89 | -0.95 | 1.05 | 0.051 | 1.329 |
| 11/13/2017 2:25 | 22.23 | 20.03 | 22.95 | -1.02 | 0.83 | 0.038 | 1.325 |
| 11/13/2017 2:26 | 22.30 | 20.21 | 23.39 | -1.10 | 0.85 | 0.036 | 1.344 |
| 11/13/2017 2:27 | 22.35 | 21.56 | 23.57 | -0.54 | 1.49 | 0.045 | 1.361 |
| 11/13/2017 2:28 | 22.48 | 21.48 | 23.09 | -0.96 | 1.08 | 0.030 | 1.357 |
| 11/13/2017 2:29 | 22.18 | 20.18 | 22.48 | -0.38 | 2.05 | 0.037 | 1.345 |
| 11/13/2017 2:30 | 21.93 | 20.64 | 23.04 | -0.68 | 1.38 | 0.040 | 1.323 |
| 11/13/2017 2:31 | 21.65 | 19.76 | 22.23 | -0.56 | 1.53 | 0.033 | 1.320 |
| 11/13/2017 2:32 | 21.55 | 19.53 | 22.04 | -0.22 | 1.68 | 0.045 | 1.310 |
| 11/13/2017 2:33 | 21.40 | 19.50 | 22.13 | -0.23 | 1.40 | 0.040 | 1.328 |
| 11/13/2017 2:34 | 21.43 | 20.84 | 22.60 | -0.71 | 1.22 | 0.030 | 1.326 |
| 11/13/2017 2:35 | 21.58 | 19.06 | 22.73 | -1.08 | 1.23 | 0.038 | 1.317 |
| 11/13/2017 2:36 | 21.80 | 21.22 | 22.31 | -0.87 | 1.51 | 0.037 | 1.305 |
| 11/13/2017 2:37 | 21.73 | 19.91 | 21.98 | -1.04 | 1.27 | 0.029 | 1.322 |
| 11/13/2017 2:38 | 21.48 | 19.68 | 22.18 | -0.84 | 1.46 | 0.037 | 1.312 |
| 11/13/2017 2:39 | 21.48 | 20.81 | 22.85 | -0.81 | 1.15 | 0.032 | 1.301 |
| 11/13/2017 2:40 | 21.62 | 20.43 | 22.95 | -0.39 | 1.91 | 0.038 | 1.302 |
| 11/13/2017 2:41 | 21.87 | 21.39 | 22.78 | -1.19 | 0.97 | 0.049 | 1.297 |
| 11/13/2017 2:42 | 22.10 | 21.52 | 23.77 | -1.36 | 0.99 | 0.034 | 1.311 |
| 11/13/2017 2:43 | 22.33 | 21.24 | 23.20 | -1.13 | 1.15 | 0.042 | 1.311 |
| 11/13/2017 2:44 | 22.50 | 20.52 | 23.06 | -0.61 | 1.29 | 0.035 | 1.302 |
| 11/13/2017 2:45 | 22.22 | 20.07 | 22.05 | -0.39 | 1.85 | 0.032 | 1.314 |
| 11/13/2017 2:46 | 21.68 | 20.48 | 22.13 | -0.84 | 1.24 | 0.037 | 1.302 |
| 11/13/2017 2:47 | 21.43 | 21.40 | 22.27 | -1.08 | 1.53 | 0.034 | 1.323 |
| 11/13/2017 2:48 | 21.38 | 20.36 | 22.45 | -0.61 | 1.35 | 0.034 | 1.317 |
| 11/13/2017 2:49 | 21.52 | 18.75 | 22.18 | -0.70 | 1.39 | 0.039 | 1.300 |
| 11/13/2017 2:50 | 21.43 | 20.79 | 22.42 | -1.37 | 1.05 | 0.033 | 1.311 |
| 11/13/2017 2:51 | 21.47 | 20.07 | 22.05 | -1.22 | 1.15 | 0.040 | 1.298 |
| 11/13/2017 2:52 | 21.52 | 22.06 | 22.89 | -1.38 | 0.92 | 0.032 | 1.280 |
| 11/13/2017 2:53 | 21.90 | 21.22 | 23.37 | -1.46 | 0.91 | 0.025 | 1.287 |
| 11/13/2017 2:54 | 22.33 | 20.90 | 23.88 | -1.48 | 1.02 | 0.040 | 1.290 |
| 11/13/2017 2:55 | 22.80 | 22.76 | 23.49 | -1.48 | 1.52 | 0.032 | 1.289 |
| 11/13/2017 2:56 | 22.90 | 20.05 | 23.35 | -1.30 | 1.40 | 0.029 | 1.282 |
| 11/13/2017 2:57 | 22.83 | 21.45 | 23.49 | -1.41 | 0.90 | 0.046 | 1.283 |
| 11/13/2017 2:58 | 22.85 | 20.88 | 23.90 | -1.32 | 0.91 | 0.033 | 1.306 |
| 11/13/2017 2:59 | 22.68 | 20.84 | 23.03 | -0.82 | 1.23 | 0.034 | 1.310 |
| 11/13/2017 3:00 | 22.38 | 20.63 | 22.53 | -0.50 | 1.11 | 0.034 | 1.311 |
| 11/13/2017 3:01 | 22.03 | 20.34 | 22.85 | -0.33 | 1.59 | 0.027 | 1.287 |
| 11/13/2017 3:02 | 22.13 | 21.63 | 23.51 | -1.28 | 1.19 | 0.047 | 1.303 |
| 11/13/2017 3:03 | 22.38 | 20.24 | 23.61 | -1.39 | 0.93 | 0.045 | 1.315 |
| 11/13/2017 3:04 | 22.42 | 19.81 | 22.18 | -1.34 | 0.93 | 0.034 | 1.326 |
| 11/13/2017 3:05 | 22.05 | 19.76 | 22.40 | -1.21 | 1.08 | 0.038 | 1.329 |

|                 |       |       |       |       |      |       |       |
|-----------------|-------|-------|-------|-------|------|-------|-------|
| 11/13/2017 3:06 | 21.80 | 21.83 | 22.15 | -0.54 | 1.87 | 0.027 | 1.333 |
| 11/13/2017 3:07 | 21.55 | 19.98 | 21.98 | -0.72 | 1.55 | 0.030 | 1.314 |
| 11/13/2017 3:08 | 21.48 | 20.20 | 21.84 | -0.51 | 1.30 | 0.044 | 1.328 |
| 11/13/2017 3:09 | 21.37 | 19.41 | 22.02 | -0.84 | 1.50 | 0.026 | 1.336 |
| 11/13/2017 3:10 | 21.28 | 19.11 | 21.86 | 0.15  | 2.45 | 0.034 | 1.327 |
| 11/13/2017 3:11 | 21.35 | 20.35 | 22.18 | -0.22 | 1.70 | 0.034 | 1.330 |
| 11/13/2017 3:12 | 21.43 | 20.45 | 21.96 | -0.41 | 1.98 | 0.023 | 1.331 |
| 11/13/2017 3:13 | 21.47 | 20.18 | 22.11 | -0.44 | 1.61 | 0.032 | 1.350 |
| 11/13/2017 3:14 | 21.27 | 19.68 | 21.76 | -0.26 | 1.79 | 0.038 | 1.336 |
| 11/13/2017 3:15 | 21.15 | 18.85 | 21.90 | -0.34 | 1.63 | 0.035 | 1.328 |
| 11/13/2017 3:16 | 21.17 | 20.18 | 22.49 | -1.37 | 1.09 | 0.036 | 1.344 |
| 11/13/2017 3:17 | 21.40 | 20.22 | 22.09 | -1.25 | 1.28 | 0.039 | 1.336 |
| 11/13/2017 3:18 | 21.45 | 21.13 | 22.57 | -0.03 | 1.78 | 0.028 | 1.321 |
| 11/13/2017 3:19 | 21.82 | 21.62 | 23.28 | -1.46 | 1.13 | 0.036 | 1.335 |
| 11/13/2017 3:20 | 22.00 | 20.71 | 22.86 | -1.48 | 1.04 | 0.029 | 1.333 |
| 11/13/2017 3:21 | 22.03 | 20.45 | 21.79 | -1.46 | 0.95 | 0.033 | 1.350 |
| 11/13/2017 3:22 | 21.57 | 19.27 | 21.21 | -1.12 | 1.53 | 0.034 | 1.340 |
| 11/13/2017 3:23 | 21.28 | 20.85 | 22.34 | -1.36 | 1.00 | 0.026 | 1.302 |
| 11/13/2017 3:24 | 21.25 | 19.90 | 22.43 | -1.51 | 1.07 | 0.034 | 1.307 |
| 11/13/2017 3:25 | 21.57 | 20.47 | 22.51 | -1.51 | 0.91 | 0.033 | 1.331 |
| 11/13/2017 3:26 | 21.72 | 20.13 | 22.28 | -1.55 | 0.96 | 0.021 | 1.330 |
| 11/13/2017 3:27 | 21.82 | 22.02 | 22.19 | -1.52 | 0.97 | 0.034 | 1.332 |
| 11/13/2017 3:28 | 21.90 | 21.26 | 23.14 | -1.55 | 1.01 | 0.028 | 1.332 |
| 11/13/2017 3:29 | 22.22 | 21.58 | 23.48 | -1.57 | 0.73 | 0.032 | 1.321 |
| 11/13/2017 3:30 | 22.70 | 21.59 | 24.10 | -1.24 | 1.11 | 0.042 | 1.335 |
| 11/13/2017 3:31 | 23.07 | 22.47 | 23.91 | -1.23 | 1.45 | 0.030 | 1.355 |
| 11/13/2017 3:32 | 23.15 | 22.06 | 23.65 | -0.75 | 1.73 | 0.031 | 1.366 |
| 11/13/2017 3:33 | 23.07 | 21.19 | 23.14 | -0.49 | 1.45 | 0.038 | 1.352 |
| 11/13/2017 3:34 | 22.68 | 21.73 | 22.99 | -0.64 | 1.89 | 0.028 | 1.341 |
| 11/13/2017 3:35 | 22.77 | 22.84 | 24.06 | -1.35 | 1.18 | 0.032 | 1.341 |
| 11/13/2017 3:36 | 22.83 | 21.75 | 23.66 | -1.33 | 1.43 | 0.032 | 1.328 |
| 11/13/2017 3:37 | 22.95 | 21.34 | 23.43 | -0.92 | 1.60 | 0.025 | 1.327 |
| 11/13/2017 3:38 | 22.67 | 21.13 | 22.87 | -1.01 | 1.46 | 0.037 | 1.348 |
| 11/13/2017 3:39 | 22.43 | 21.23 | 23.04 | -0.96 | 1.66 | 0.027 | 1.325 |
| 11/13/2017 3:40 | 22.27 | 21.27 | 22.74 | 0.09  | 2.63 | 0.031 | 1.317 |
| 11/13/2017 3:41 | 22.05 | 19.66 | 21.93 | -1.23 | 1.30 | 0.035 | 1.350 |
| 11/13/2017 3:42 | 21.67 | 19.57 | 21.45 | -1.50 | 1.13 | 0.021 | 1.338 |
| 11/13/2017 3:43 | 21.33 | 19.05 | 22.27 | -1.52 | 0.98 | 0.033 | 1.327 |
| 11/13/2017 3:44 | 21.38 | 21.50 | 22.93 | -1.54 | 1.18 | 0.031 | 1.326 |
| 11/13/2017 3:45 | 21.97 | 22.15 | 23.59 | -1.56 | 1.06 | 0.026 | 1.324 |
| 11/13/2017 3:46 | 22.50 | 20.71 | 23.70 | -1.56 | 1.03 | 0.033 | 1.354 |
| 11/13/2017 3:47 | 22.83 | 22.19 | 23.96 | -1.58 | 1.24 | 0.030 | 1.360 |
| 11/13/2017 3:48 | 23.03 | 21.38 | 23.93 | -1.57 | 1.16 | 0.029 | 1.340 |
| 11/13/2017 3:49 | 23.00 | 21.18 | 23.47 | -1.57 | 1.19 | 0.032 | 1.318 |
| 11/13/2017 3:50 | 23.05 | 21.97 | 24.35 | -1.37 | 1.25 | 0.029 | 1.312 |
| 11/13/2017 3:51 | 23.30 | 22.87 | 24.44 | -1.32 | 1.41 | 0.031 | 1.335 |
| 11/13/2017 3:52 | 23.38 | 21.53 | 23.94 | -1.31 | 1.28 | 0.033 | 1.349 |



|                 |       |       |       |       |      |       |       |
|-----------------|-------|-------|-------|-------|------|-------|-------|
| 11/13/2017 3:53 | 23.52 | 21.34 | 23.87 | -1.51 | 0.87 | 0.024 | 1.346 |
| 11/13/2017 3:54 | 23.13 | 22.25 | 23.90 | -1.54 | 1.02 | 0.031 | 1.346 |
| 11/13/2017 3:55 | 23.15 | 20.64 | 23.66 | -1.53 | 1.29 | 0.034 | 1.341 |
| 11/13/2017 3:56 | 22.92 | 21.06 | 23.04 | -1.53 | 1.14 | 0.019 | 1.341 |
| 11/13/2017 3:57 | 22.68 | 21.43 | 22.94 | -1.55 | 0.97 | 0.032 | 1.342 |
| 11/13/2017 3:58 | 22.42 | 21.52 | 22.60 | -1.57 | 1.15 | 0.032 | 1.338 |
| 11/13/2017 3:59 | 22.30 | 20.73 | 22.76 | -1.48 | 1.32 | 0.024 | 1.344 |
| 11/13/2017 4:00 | 22.12 | 20.58 | 22.74 | -1.56 | 0.93 | 0.027 | 1.328 |
| 11/13/2017 4:01 | 22.17 | 21.54 | 23.60 | -1.54 | 1.04 | 0.026 | 1.320 |
| 11/13/2017 4:02 | 22.30 | 20.78 | 22.93 | -1.58 | 1.10 | 0.024 | 1.342 |
| 11/13/2017 4:03 | 22.30 | 21.65 | 22.09 | -1.54 | 0.97 | 0.037 | 1.337 |
| 11/13/2017 4:04 | 22.05 | 21.14 | 22.86 | -0.84 | 1.74 | 0.022 | 1.337 |
| 11/13/2017 4:05 | 21.85 | 18.78 | 22.45 | -0.01 | 2.57 | 0.035 | 1.333 |
| 11/13/2017 4:06 | 21.67 | 19.64 | 21.76 | 0.36  | 2.70 | 0.027 | 1.307 |
| 11/13/2017 4:07 | 21.52 | 21.28 | 21.87 | -0.68 | 1.52 | 0.022 | 1.303 |
| 11/13/2017 4:08 | 21.45 | 21.68 | 22.25 | -1.06 | 1.37 | 0.030 | 1.319 |
| 11/13/2017 4:09 | 21.68 | 20.97 | 22.74 | -0.86 | 1.35 | 0.025 | 1.326 |
| 11/13/2017 4:10 | 22.17 | 21.50 | 23.63 | -1.32 | 1.20 | 0.028 | 1.321 |
| 11/13/2017 4:11 | 22.65 | 22.23 | 23.92 | -0.84 | 1.20 | 0.033 | 1.308 |
| 11/13/2017 4:12 | 22.90 | 21.68 | 23.30 | -1.28 | 1.19 | 0.022 | 1.334 |
| 11/13/2017 4:13 | 22.77 | 21.92 | 22.86 | -1.22 | 0.91 | 0.030 | 1.353 |
| 11/13/2017 4:14 | 22.35 | 20.04 | 21.68 | -1.16 | 1.27 | 0.031 | 1.351 |
| 11/13/2017 4:15 | 21.75 | 20.83 | 21.46 | -0.69 | 1.43 | 0.014 | 1.348 |
| 11/13/2017 4:16 | 21.48 | 20.51 | 22.59 | -0.73 | 1.40 | 0.027 | 1.357 |
| 11/13/2017 4:17 | 21.62 | 20.49 | 22.49 | -0.57 | 1.46 | 0.020 | 1.336 |
| 11/13/2017 4:18 | 21.98 | 20.79 | 23.38 | -0.76 | 1.27 | 0.024 | 1.344 |
| 11/13/2017 4:19 | 22.30 | 19.98 | 22.99 | -0.67 | 1.24 | 0.033 | 1.365 |
| 11/13/2017 4:20 | 22.32 | 19.70 | 22.76 | 0.11  | 2.05 | 0.026 | 1.375 |
| 11/13/2017 4:21 | 22.25 | 22.36 | 22.53 | -0.06 | 1.62 | 0.026 | 1.347 |
| 11/13/2017 4:22 | 22.23 | 20.68 | 23.26 | -0.46 | 1.52 | 0.029 | 1.340 |
| 11/13/2017 4:23 | 22.37 | 21.91 | 23.63 | 0.11  | 1.71 | 0.019 | 1.345 |
| 11/13/2017 4:24 | 22.75 | 21.08 | 23.25 | -0.90 | 1.23 | 0.028 | 1.338 |
| 11/13/2017 4:25 | 22.68 | 20.99 | 23.09 | -0.16 | 1.39 | 0.025 | 1.332 |
| 11/13/2017 4:26 | 22.72 | 21.26 | 23.67 | -1.03 | 1.08 | 0.018 | 1.340 |
| 11/13/2017 4:27 | 22.70 | 22.48 | 23.62 | -1.15 | 0.99 | 0.031 | 1.312 |
| 11/13/2017 4:28 | 22.83 | 20.76 | 23.31 | -1.16 | 1.07 | 0.027 | 1.287 |
| 11/13/2017 4:29 | 22.78 | 20.89 | 23.34 | -0.86 | 1.33 | 0.021 | 1.303 |
| 11/13/2017 4:30 | 22.48 | 19.81 | 23.30 | -0.90 | 1.46 | 0.032 | 1.309 |
| 11/13/2017 4:31 | 22.30 | 19.66 | 22.73 | -0.80 | 1.16 | 0.017 | 1.306 |
| 11/13/2017 4:32 | 22.17 | 20.86 | 22.98 | -0.73 | 1.33 | 0.031 | 1.310 |
| 11/13/2017 4:33 | 22.40 | 21.96 | 23.74 | -0.93 | 1.02 | 0.030 | 1.313 |
| 11/13/2017 4:34 | 22.55 | 20.19 | 22.88 | -0.92 | 1.63 | 0.019 | 1.320 |
| 11/13/2017 4:35 | 22.57 | 19.76 | 22.77 | -0.40 | 1.53 | 0.030 | 1.335 |
| 11/13/2017 4:36 | 22.18 | 20.59 | 22.70 | -0.96 | 1.14 | 0.022 | 1.318 |
| 11/13/2017 4:37 | 22.07 | 22.05 | 23.44 | -1.29 | 1.04 | 0.019 | 1.317 |
| 11/13/2017 4:38 | 22.33 | 22.68 | 23.78 | -1.29 | 1.08 | 0.030 | 1.312 |
| 11/13/2017 4:39 | 22.43 | 20.92 | 22.37 | -0.10 | 2.31 | 0.011 | 1.339 |

|                 |       |       |       |       |      |       |       |
|-----------------|-------|-------|-------|-------|------|-------|-------|
| 11/13/2017 4:40 | 21.92 | 18.80 | 20.64 | 0.81  | 2.04 | 0.028 | 1.345 |
| 11/13/2017 4:41 | 20.98 | 20.98 | 22.09 | 1.20  | 1.94 | 0.029 | 1.341 |
| 11/13/2017 4:42 | 21.22 | 22.08 | 24.35 | -0.99 | 1.05 | 0.011 | 1.334 |
| 11/13/2017 4:43 | 22.13 | 21.68 | 24.29 | -1.26 | 0.77 | 0.034 | 1.308 |
| 11/13/2017 4:44 | 23.37 | 22.66 | 24.76 | -1.22 | 0.86 | 0.022 | 1.317 |
| 11/13/2017 4:45 | 23.43 | 21.50 | 23.62 | -1.21 | 0.82 | 0.012 | 1.343 |
| 11/13/2017 4:46 | 23.20 | 20.80 | 23.45 | -1.07 | 1.27 | 0.025 | 1.367 |
| 11/13/2017 4:47 | 23.05 | 21.73 | 23.97 | -1.09 | 1.05 | 0.018 | 1.352 |
| 11/13/2017 4:48 | 22.92 | 21.49 | 23.55 | -0.75 | 1.39 | 0.017 | 1.336 |
| 11/13/2017 4:49 | 23.00 | 20.80 | 23.57 | -0.46 | 1.13 | 0.033 | 1.351 |
| 11/13/2017 4:50 | 22.93 | 21.37 | 24.24 | -1.00 | 1.00 | 0.014 | 1.344 |
| 11/13/2017 4:51 | 23.10 | 21.83 | 23.72 | -1.09 | 0.82 | 0.027 | 1.359 |
| 11/13/2017 4:52 | 23.08 | 21.63 | 23.79 | -1.16 | 0.73 | 0.021 | 1.368 |
| 11/13/2017 4:53 | 23.22 | 21.44 | 24.15 | -1.17 | 0.77 | 0.018 | 1.353 |
| 11/13/2017 4:54 | 23.22 | 20.94 | 23.63 | -1.00 | 1.01 | 0.029 | 1.331 |
| 11/13/2017 4:55 | 23.22 | 21.76 | 23.42 | -0.29 | 1.72 | 0.024 | 1.370 |
| 11/13/2017 4:56 | 22.88 | 20.35 | 23.15 | 0.27  | 1.38 | 0.019 | 1.378 |
| 11/13/2017 4:57 | 22.57 | 22.31 | 22.95 | 0.27  | 1.24 | 0.025 | 1.368 |
| 11/13/2017 4:58 | 22.50 | 21.02 | 23.54 | 0.06  | 1.52 | 0.008 | 1.370 |
| 11/13/2017 4:59 | 22.40 | 20.63 | 22.58 | 0.07  | 1.71 | 0.016 | 1.346 |
| 11/13/2017 5:00 | 22.23 | 20.24 | 22.79 | -0.05 | 1.39 | 0.028 | 1.357 |
| 11/13/2017 5:01 | 22.08 | 19.66 | 23.23 | -0.40 | 1.24 | 0.009 | 1.369 |
| 11/13/2017 5:02 | 22.22 | 21.16 | 23.44 | -0.80 | 1.18 | 0.023 | 1.400 |
| 11/13/2017 5:03 | 22.40 | 21.83 | 22.95 | -0.82 | 1.37 | 0.020 | 1.408 |
| 11/13/2017 5:04 | 22.47 | 21.10 | 23.39 | -1.09 | 1.22 | 0.010 | 1.389 |
| 11/13/2017 5:05 | 22.48 | 21.84 | 23.03 | -1.25 | 0.97 | 0.025 | 1.386 |
| 11/13/2017 5:06 | 22.33 | 21.16 | 22.85 | -1.00 | 1.06 | 0.022 | 1.382 |
| 11/13/2017 5:07 | 22.27 | 20.60 | 22.88 | -1.18 | 0.90 | 0.019 | 1.369 |
| 11/13/2017 5:08 | 22.03 | 21.17 | 22.67 | -1.01 | 0.92 | 0.029 | 1.381 |
| 11/13/2017 5:09 | 22.13 | 20.04 | 23.12 | -1.09 | 1.27 | 0.020 | 1.390 |
| 11/13/2017 5:10 | 22.25 | 21.11 | 23.30 | -1.16 | 0.93 | 0.017 | 1.380 |
| 11/13/2017 5:11 | 22.48 | 21.53 | 23.29 | -1.30 | 1.04 | 0.027 | 1.361 |
| 11/13/2017 5:12 | 22.48 | 20.83 | 22.49 | -1.29 | 0.94 | 0.016 | 1.374 |
| 11/13/2017 5:13 | 22.28 | 20.81 | 22.35 | -1.28 | 0.92 | 0.023 | 1.381 |
| 11/13/2017 5:14 | 22.00 | 21.00 | 22.67 | -1.27 | 1.06 | 0.026 | 1.371 |
| 11/13/2017 5:15 | 21.87 | 20.02 | 22.96 | -1.20 | 1.08 | 0.013 | 1.380 |
| 11/13/2017 5:16 | 21.82 | 20.03 | 21.95 | -1.31 | 0.94 | 0.030 | 1.371 |
| 11/13/2017 5:17 | 21.60 | 21.14 | 22.28 | -1.38 | 0.72 | 0.021 | 1.366 |
| 11/13/2017 5:18 | 21.62 | 21.86 | 22.97 | -1.40 | 0.90 | 0.019 | 1.355 |
| 11/13/2017 5:19 | 21.93 | 20.94 | 22.91 | -1.43 | 0.99 | 0.033 | 1.355 |
| 11/13/2017 5:20 | 22.20 | 20.19 | 22.38 | -1.43 | 1.00 | 0.022 | 1.328 |
| 11/13/2017 5:21 | 22.25 | 22.08 | 23.14 | -1.38 | 1.15 | 0.026 | 1.322 |
| 11/13/2017 5:22 | 22.37 | 20.49 | 23.31 | -1.25 | 1.12 | 0.025 | 1.349 |
| 11/13/2017 5:23 | 22.47 | 20.43 | 22.38 | -0.50 | 1.88 | 0.020 | 1.351 |
| 11/13/2017 5:24 | 22.22 | 20.58 | 22.07 | -0.50 | 1.23 | 0.036 | 1.344 |
| 11/13/2017 5:25 | 21.58 | 20.63 | 21.33 | -0.97 | 0.97 | 0.023 | 1.353 |
| 11/13/2017 5:26 | 21.17 | 19.74 | 21.67 | -1.17 | 0.99 | 0.019 | 1.351 |

|                 |       |       |       |       |      |       |       |
|-----------------|-------|-------|-------|-------|------|-------|-------|
| 11/13/2017 5:27 | 21.00 | 18.47 | 21.65 | -1.13 | 0.77 | 0.031 | 1.360 |
| 11/13/2017 5:28 | 21.00 | 19.33 | 21.83 | -1.08 | 0.96 | 0.015 | 1.343 |
| 11/13/2017 5:29 | 20.93 | 18.80 | 21.44 | -0.99 | 0.92 | 0.025 | 1.361 |
| 11/13/2017 5:30 | 20.87 | 18.99 | 21.78 | -0.43 | 1.43 | 0.029 | 1.362 |
| 11/13/2017 5:31 | 20.77 | 19.13 | 21.19 | -0.55 | 0.99 | 0.020 | 1.363 |
| 11/13/2017 5:32 | 20.63 | 20.15 | 21.43 | -0.22 | 1.31 | 0.030 | 1.373 |
| 11/13/2017 5:33 | 20.57 | 17.58 | 21.03 | -0.01 | 1.43 | 0.029 | 1.378 |
| 11/13/2017 5:34 | 20.27 | 16.54 | 20.17 | -0.12 | 1.50 | 0.019 | 1.388 |
| 11/13/2017 5:35 | 19.93 | 18.36 | 20.54 | 0.67  | 2.14 | 0.024 | 1.399 |
| 11/13/2017 5:36 | 19.78 | 19.23 | 21.23 | -0.21 | 1.26 | 0.018 | 1.382 |
| 11/13/2017 5:37 | 20.23 | 19.73 | 22.28 | -1.06 | 1.07 | 0.024 | 1.361 |
| 11/13/2017 5:38 | 20.68 | 18.83 | 21.54 | -0.84 | 1.16 | 0.033 | 1.389 |
| 11/13/2017 5:39 | 20.88 | 19.18 | 21.51 | -0.85 | 1.23 | 0.017 | 1.389 |
| 11/13/2017 5:40 | 20.92 | 19.18 | 21.82 | -1.13 | 1.12 | 0.037 | 1.392 |
| 11/13/2017 5:41 | 21.20 | 20.76 | 22.02 | -1.01 | 1.05 | 0.026 | 1.379 |
| 11/13/2017 5:42 | 21.37 | 19.88 | 21.91 | -0.76 | 1.64 | 0.023 | 1.372 |
| 11/13/2017 5:43 | 21.35 | 19.91 | 21.77 | -0.80 | 1.17 | 0.030 | 1.381 |
| 11/13/2017 5:44 | 20.88 | 19.14 | 21.11 | -0.18 | 2.19 | 0.019 | 1.394 |
| 11/13/2017 5:45 | 20.47 | 17.47 | 20.58 | 0.15  | 1.78 | 0.029 | 1.392 |
| 11/13/2017 5:46 | 19.90 | 18.75 | 20.30 | 0.31  | 1.54 | 0.027 | 1.402 |
| 11/13/2017 5:47 | 19.65 | 17.79 | 20.23 | -0.66 | 1.15 | 0.021 | 1.393 |
| 11/13/2017 5:48 | 19.65 | 20.29 | 21.27 | -0.32 | 1.45 | 0.020 | 1.403 |
| 11/13/2017 5:49 | 20.33 | 22.53 | 23.39 | -0.92 | 0.97 | 0.026 | 1.408 |
| 11/13/2017 5:50 | 21.40 | 22.03 | 23.85 | -1.29 | 1.02 | 0.014 | 1.395 |
| 11/13/2017 5:51 | 22.62 | 22.23 | 24.22 | -1.34 | 0.73 | 0.030 | 1.400 |
| 11/13/2017 5:52 | 23.18 | 22.19 | 23.61 | -1.36 | 0.89 | 0.019 | 1.396 |
| 11/13/2017 5:53 | 23.38 | 23.09 | 24.50 | -1.38 | 0.93 | 0.019 | 1.400 |
| 11/13/2017 5:54 | 23.57 | 21.57 | 24.12 | -1.31 | 0.73 | 0.033 | 1.427 |
| 11/13/2017 5:55 | 23.30 | 22.06 | 23.06 | -0.84 | 1.20 | 0.009 | 1.421 |
| 11/13/2017 5:56 | 23.03 | 21.88 | 23.80 | -0.67 | 1.58 | 0.024 | 1.413 |
| 11/13/2017 5:57 | 22.72 | 21.52 | 23.12 | -1.13 | 1.12 | 0.027 | 1.409 |
| 11/13/2017 5:58 | 22.75 | 21.72 | 23.59 | -1.13 | 1.28 | 0.018 | 1.420 |
| 11/13/2017 5:59 | 22.83 | 20.63 | 23.08 | -0.74 | 1.49 | 0.024 | 1.405 |
| 11/13/2017 6:00 | 22.67 | 20.83 | 22.97 | -0.96 | 0.92 | 0.026 | 1.406 |
| 11/13/2017 6:01 | 22.70 | 21.10 | 23.23 | -1.30 | 0.86 | 0.013 | 1.389 |
| 11/13/2017 6:02 | 22.62 | 20.72 | 23.68 | -1.12 | 1.27 | 0.024 | 1.413 |
| 11/13/2017 6:03 | 22.72 | 20.51 | 23.29 | -1.37 | 1.12 | 0.023 | 1.408 |
| 11/13/2017 6:04 | 22.70 | 21.06 | 23.54 | -1.29 | 1.03 | 0.017 | 1.416 |
| 11/13/2017 6:05 | 22.78 | 20.51 | 23.13 | -1.16 | 1.02 | 0.022 | 1.443 |
| 11/13/2017 6:06 | 22.78 | 20.93 | 23.55 | -1.33 | 1.03 | 0.012 | 1.434 |
| 11/13/2017 6:07 | 22.90 | 20.91 | 23.56 | -1.36 | 0.66 | 0.016 | 1.399 |
| 11/13/2017 6:08 | 22.98 | 21.15 | 23.75 | -1.41 | 0.98 | 0.023 | 1.390 |
| 11/13/2017 6:09 | 23.00 | 20.57 | 23.48 | -1.40 | 1.13 | 0.015 | 1.391 |
| 11/13/2017 6:10 | 22.83 | 22.29 | 23.11 | -1.42 | 0.93 | 0.015 | 1.410 |
| 11/13/2017 6:11 | 22.80 | 21.63 | 23.51 | -1.43 | 0.91 | 0.022 | 1.378 |
| 11/13/2017 6:12 | 22.78 | 22.34 | 23.28 | -1.43 | 0.94 | 0.007 | 1.365 |
| 11/13/2017 6:13 | 22.78 | 20.48 | 23.40 | -1.44 | 0.95 | 0.023 | 1.351 |

|                 |       |       |       |       |      |       |       |
|-----------------|-------|-------|-------|-------|------|-------|-------|
| 11/13/2017 6:14 | 22.73 | 21.24 | 23.17 | -1.42 | 0.84 | 0.024 | 1.343 |
| 11/13/2017 6:15 | 22.43 | 21.28 | 22.98 | -1.39 | 1.06 | 0.013 | 1.347 |
| 11/13/2017 6:16 | 22.28 | 19.67 | 23.12 | -1.08 | 1.22 | 0.029 | 1.356 |
| 11/13/2017 6:17 | 22.35 | 21.61 | 23.83 | -1.38 | 0.88 | 0.017 | 1.361 |
| 11/13/2017 6:18 | 22.67 | 22.07 | 24.29 | -0.97 | 1.25 | 0.014 | 1.346 |
| 11/13/2017 6:19 | 23.18 | 23.42 | 24.57 | -1.12 | 1.03 | 0.029 | 1.357 |
| 11/13/2017 6:20 | 23.45 | 21.79 | 24.19 | -1.19 | 0.98 | 0.014 | 1.364 |
| 11/13/2017 6:21 | 23.55 | 21.60 | 24.23 | -1.24 | 0.96 | 0.021 | 1.340 |
| 11/13/2017 6:22 | 23.40 | 21.39 | 23.64 | -0.49 | 2.30 | 0.021 | 1.345 |
| 11/13/2017 6:23 | 23.00 | 22.98 | 23.63 | -0.21 | 1.81 | 0.012 | 1.352 |
| 11/13/2017 6:24 | 22.75 | 22.05 | 23.67 | -1.03 | 1.15 | 0.024 | 1.347 |
| 11/13/2017 6:25 | 22.75 | 20.74 | 24.00 | -1.31 | 0.81 | 0.015 | 1.357 |
| 11/13/2017 6:26 | 22.80 | 22.95 | 23.38 | -1.18 | 0.70 | 0.015 | 1.364 |
| 11/13/2017 6:27 | 22.63 | 21.34 | 23.11 | -1.04 | 1.01 | 0.016 | 1.359 |
| 11/13/2017 6:28 | 22.18 | 21.41 | 22.65 | -0.59 | 1.52 | 0.017 | 1.379 |
| 11/13/2017 6:29 | 21.95 | 20.83 | 22.52 | -0.75 | 1.51 | 0.016 | 1.371 |
| 11/13/2017 6:30 | 21.73 | 19.73 | 22.57 | -0.96 | 1.14 | 0.024 | 1.375 |
| 11/13/2017 6:31 | 21.93 | 21.82 | 23.55 | -0.27 | 1.80 | 0.010 | 1.390 |
| 11/13/2017 6:32 | 22.33 | 22.23 | 24.25 | -0.78 | 1.14 | 0.022 | 1.381 |
| 11/13/2017 6:33 | 22.87 | 21.54 | 23.82 | -0.76 | 1.38 | 0.016 | 1.398 |
| 11/13/2017 6:34 | 22.97 | 21.51 | 22.78 | -0.42 | 1.32 | 0.009 | 1.401 |
| 11/13/2017 6:35 | 22.48 | 20.61 | 22.29 | 0.53  | 1.69 | 0.025 | 1.390 |
| 11/13/2017 6:36 | 21.93 | 20.10 | 22.50 | 0.79  | 1.71 | 0.020 | 1.391 |
| 11/13/2017 6:37 | 21.77 | 20.40 | 23.02 | 0.10  | 1.43 | 0.014 | 1.401 |
| 11/13/2017 6:38 | 22.28 | 22.55 | 24.65 | -0.27 | 1.31 | 0.025 | 1.394 |
| 11/13/2017 6:39 | 23.08 | 22.30 | 24.49 | -0.07 | 1.83 | 0.011 | 1.387 |
| 11/13/2017 6:40 | 24.00 | 23.87 | 25.90 | -1.03 | 0.81 | 0.012 | 1.375 |
| 11/13/2017 6:41 | 24.38 | 21.99 | 25.04 | -0.40 | 1.78 | 0.025 | 1.378 |
| 11/13/2017 6:42 | 24.63 | 24.32 | 25.37 | -0.93 | 0.97 | 0.010 | 1.373 |
| 11/13/2017 6:43 | 24.50 | 22.76 | 24.83 | -0.90 | 1.12 | 0.014 | 1.371 |
| 11/13/2017 6:44 | 24.48 | 22.66 | 25.01 | -0.92 | 0.96 | 0.023 | 1.370 |
| 11/13/2017 6:45 | 24.22 | 21.03 | 24.14 | -0.61 | 1.73 | 0.005 | 1.363 |
| 11/13/2017 6:46 | 24.08 | 23.38 | 25.59 | -0.89 | 1.45 | 0.018 | 1.372 |
| 11/13/2017 6:47 | 24.33 | 23.72 | 25.57 | -1.06 | 0.87 | 0.011 | 1.392 |
| 11/13/2017 6:48 | 24.67 | 22.50 | 25.11 | -0.77 | 1.07 | 0.016 | 1.392 |
| 11/13/2017 6:49 | 24.62 | 21.82 | 24.47 | -0.57 | 1.23 | 0.022 | 1.380 |
| 11/13/2017 6:50 | 24.17 | 23.66 | 24.64 | -0.87 | 0.98 | 0.008 | 1.355 |
| 11/13/2017 6:51 | 23.93 | 22.15 | 25.10 | -1.04 | 0.92 | 0.015 | 1.345 |
| 11/13/2017 6:52 | 23.82 | 22.59 | 23.83 | -1.08 | 0.65 | 0.022 | 1.360 |
| 11/13/2017 6:53 | 23.42 | 20.71 | 23.22 | -0.99 | 0.70 | 0.011 | 1.353 |
| 11/13/2017 6:54 | 22.98 | 21.13 | 23.76 | -0.93 | 0.91 | 0.021 | 1.356 |
| 11/13/2017 6:55 | 22.75 | 22.06 | 24.02 | -1.12 | 0.85 | 0.017 | 1.356 |
| 11/13/2017 6:56 | 23.23 | 21.57 | 24.84 | -1.31 | 0.96 | 0.009 | 1.343 |
| 11/13/2017 6:57 | 23.90 | 22.37 | 25.57 | -1.45 | 1.15 | 0.020 | 1.359 |
| 11/13/2017 6:58 | 24.40 | 22.58 | 25.08 | -1.53 | 0.65 | 0.015 | 1.360 |
| 11/13/2017 6:59 | 24.48 | 21.95 | 24.78 | -1.54 | 0.87 | 0.012 | 1.360 |
| 11/13/2017 7:00 | 24.45 | 23.38 | 25.54 | -1.54 | 0.93 | 0.019 | 1.368 |

|                 |       |       |       |       |       |       |       |
|-----------------|-------|-------|-------|-------|-------|-------|-------|
| 11/13/2017 7:01 | 24.60 | 22.87 | 25.17 | -1.56 | 0.92  | 0.007 | 1.355 |
| 11/13/2017 7:02 | 24.78 | 23.26 | 25.50 | -0.68 | 1.82  | 0.019 | 1.359 |
| 11/13/2017 7:03 | 24.83 | 22.89 | 25.03 | -1.28 | 1.15  | 0.023 | 1.349 |
| 11/13/2017 7:04 | 24.68 | 23.83 | 24.92 | -1.24 | 1.02  | 0.013 | 1.341 |
| 11/13/2017 7:05 | 24.58 | 22.24 | 25.14 | -0.97 | 1.16  | 0.026 | 1.369 |
| 11/13/2017 7:06 | 24.27 | 21.93 | 24.04 | -0.48 | 1.31  | 0.023 | 1.378 |
| 11/13/2017 7:07 | 23.93 | 21.91 | 24.11 | -0.45 | 1.17  | 0.012 | 1.367 |
| 11/13/2017 7:08 | 23.83 | 23.63 | 25.21 | -0.91 | 1.09  | 0.024 | 1.383 |
| 11/13/2017 7:09 | 24.15 | 23.92 | 25.12 | -1.29 | 1.21  | 0.011 | 1.379 |
| 11/13/2017 7:10 | 24.65 | 23.33 | 25.52 | -1.33 | 1.36  | 0.012 | 1.383 |
| 11/13/2017 7:11 | 24.63 | 23.10 | 24.88 | -0.28 | 1.97  | 0.022 | 1.388 |
| 11/13/2017 7:12 | 24.73 | 24.27 | 25.88 | -1.21 | 1.03  | 0.009 | 1.401 |
| 11/13/2017 7:13 | 24.73 | 22.78 | 25.77 | -1.29 | 0.96  | 0.014 | 1.414 |
| 11/13/2017 7:14 | 25.12 | 24.79 | 26.02 | -1.35 | 0.89  | 0.028 | 1.414 |
| 11/13/2017 7:15 | 25.33 | 23.07 | 26.51 | -1.25 | 0.80  | 0.231 | 1.457 |
| 11/13/2017 7:16 | 25.63 | 23.79 | 25.77 | -1.44 | 0.99  | 0.020 | 1.404 |
| 11/13/2017 7:17 | 25.43 | 22.59 | 25.32 | -1.31 | 1.13  | 0.020 | 1.386 |
| 11/13/2017 7:18 | 24.97 | 22.29 | 25.08 | -0.40 | 1.79  | 0.009 | 1.393 |
| 11/13/2017 7:19 | 24.42 | 24.33 | 24.99 | -1.03 | 1.04  | 0.021 | 1.392 |
| 11/13/2017 7:20 | 24.22 | 22.69 | 24.55 | -1.25 | 1.11  | 0.011 | 1.401 |
| 11/13/2017 7:21 | 23.98 | 23.26 | 23.75 | -1.31 | 0.98  | 0.020 | 1.385 |
| 11/13/2017 7:22 | 23.68 | 22.11 | 23.52 | -1.11 | 1.02  | 0.022 | 1.370 |
| 11/13/2017 7:23 | 23.35 | 21.43 | 23.91 | -0.92 | 0.92  | 0.007 | 1.386 |
| 11/13/2017 7:24 | 23.12 | 20.20 | 23.18 | -1.13 | 1.02  | 0.017 | 1.383 |
| 11/13/2017 7:25 | 23.17 | 22.95 | 24.58 | -1.08 | 0.88  | 0.024 | 1.388 |
| 11/13/2017 7:26 | 23.62 | 22.68 | 25.23 | -1.10 | 0.78  | 0.005 | 1.373 |
| 11/13/2017 7:27 | 24.03 | 21.09 | 24.60 | -0.83 | 1.89  | 0.038 | 1.356 |
| 11/13/2017 7:28 | 23.18 | 19.83 | 21.55 | 3.16  | 39.50 | 0.184 | 1.380 |
| 11/13/2017 7:29 | 22.32 | 21.56 | 24.35 | 0.00  | 1.47  | 0.013 | 1.366 |
| 11/13/2017 7:30 | 22.10 | 21.74 | 24.30 | -1.25 | 1.23  | 0.021 | 1.368 |
| 11/13/2017 7:31 | 23.20 | 23.72 | 24.93 | -1.26 | 0.86  | 0.008 | 1.379 |
| 11/13/2017 7:32 | 23.90 | 22.13 | 24.32 | -1.34 | 0.85  | 0.016 | 1.361 |
| 11/13/2017 7:33 | 23.98 | 21.96 | 24.92 | -1.35 | 0.76  | 0.016 | 1.342 |
| 11/13/2017 7:34 | 23.87 | 22.98 | 23.98 | -1.35 | 0.69  | 0.008 | 1.347 |
| 11/13/2017 7:35 | 23.82 | 23.71 | 24.60 | -1.36 | 1.14  | 0.017 | 1.339 |
| 11/13/2017 7:36 | 23.88 | 22.23 | 24.92 | -1.36 | 0.77  | 0.016 | 1.348 |
| 11/13/2017 7:37 | 24.13 | 23.17 | 25.09 | -1.33 | 0.84  | 0.011 | 1.342 |
| 11/13/2017 7:38 | 24.30 | 23.11 | 25.20 | -1.27 | 0.83  | 0.171 | 1.356 |
| 11/13/2017 7:39 | 23.92 | 21.99 | 24.05 | 0.01  | 2.51  | 1.304 | 1.505 |
| 11/13/2017 7:40 | 23.35 | 22.65 | 23.99 | -0.49 | 1.10  | 0.303 | 1.482 |
| 11/13/2017 7:41 | 23.10 | 22.66 | 24.01 | -0.95 | 0.88  | 0.048 | 1.661 |
| 11/13/2017 7:42 | 23.13 | 23.01 | 24.53 | -0.60 | 1.28  | 0.019 | 1.672 |
| 11/13/2017 7:43 | 23.38 | 19.18 | 24.09 | -0.83 | 1.12  | 0.041 | 1.417 |
| 11/13/2017 7:44 | 23.30 | 24.53 | 25.03 | -0.68 | 1.38  | 0.356 | 1.403 |
| 11/13/2017 7:45 | 23.75 | 22.57 | 24.78 | -1.17 | 0.98  | 0.015 | 1.368 |
| 11/13/2017 7:46 | 24.02 | 22.98 | 24.78 | -1.10 | 1.00  | 0.009 | 1.361 |
| 11/13/2017 7:47 | 24.47 | 23.62 | 25.09 | -1.07 | 0.82  | 0.020 | 1.358 |

|                 |       |       |       |       |      |        |       |
|-----------------|-------|-------|-------|-------|------|--------|-------|
| 11/13/2017 7:48 | 24.50 | 22.99 | 25.47 | -1.12 | 0.96 | 0.012  | 1.323 |
| 11/13/2017 7:49 | 24.57 | 22.66 | 24.53 | -0.73 | 1.40 | 0.008  | 1.340 |
| 11/13/2017 7:50 | 24.62 | 23.83 | 25.18 | -0.71 | 1.49 | 0.013  | 1.334 |
| 11/13/2017 7:51 | 24.63 | 23.53 | 25.02 | -0.86 | 1.24 | 0.007  | 1.330 |
| 11/13/2017 7:52 | 24.55 | 22.95 | 25.19 | -0.35 | 1.45 | 0.015  | 1.353 |
| 11/13/2017 7:53 | 24.78 | 24.28 | 26.50 | -0.59 | 0.93 | 0.018  | 1.331 |
| 11/13/2017 7:54 | 25.03 | 23.54 | 26.00 | -1.13 | 1.12 | 0.005  | 1.319 |
| 11/13/2017 7:55 | 25.45 | 25.55 | 26.15 | -1.18 | 1.03 | 0.014  | 1.309 |
| 11/13/2017 7:56 | 25.55 | 24.02 | 26.18 | -0.58 | 1.83 | 0.019  | 1.358 |
| 11/13/2017 7:57 | 25.45 | 23.92 | 26.44 | -0.20 | 1.69 | 0.009  | 1.371 |
| 11/13/2017 7:58 | 25.53 | 22.26 | 26.04 | -0.81 | 1.58 | 0.025  | 1.351 |
| 11/13/2017 7:59 | 25.33 | 22.51 | 25.49 | -0.13 | 1.31 | 0.019  | 1.391 |
| 11/13/2017 8:00 | 25.23 | 23.80 | 26.26 | -0.21 | 1.41 | 0.008  | 1.388 |
| 11/13/2017 8:01 | 25.02 | 22.88 | 25.47 | -0.31 | 1.73 | 0.017  | 1.383 |
| 11/13/2017 8:02 | 24.85 | 22.64 | 24.37 | -0.71 | 1.53 | 0.014  | 1.383 |
| 11/13/2017 8:03 | 24.52 | 22.74 | 24.47 | -0.91 | 1.32 | 0.009  | 1.393 |
| 11/13/2017 8:04 | 24.10 | 22.30 | 24.59 | -1.24 | 1.01 | 0.015  | 1.380 |
| 11/13/2017 8:05 | 24.07 | 22.53 | 24.95 | -0.86 | 1.35 | 0.008  | 1.360 |
| 11/13/2017 8:06 | 24.38 | 23.82 | 25.91 | -0.84 | 1.16 | 0.011  | 1.318 |
| 11/13/2017 8:07 | 24.83 | 25.04 | 26.02 | -1.11 | 1.17 | 0.013  | 1.305 |
| 11/13/2017 8:08 | 25.47 | 24.83 | 26.72 | -1.33 | 0.96 | 0.003  | 1.319 |
| 11/13/2017 8:09 | 25.77 | 24.35 | 26.25 | -1.32 | 1.01 | 0.015  | 1.339 |
| 11/13/2017 8:10 | 25.87 | 24.26 | 26.08 | -1.40 | 1.06 | 0.009  | 1.301 |
| 11/13/2017 8:11 | 25.72 | 24.14 | 26.08 | -1.00 | 1.14 | 0.000  | 1.305 |
| 11/13/2017 8:12 | 25.65 | 24.03 | 26.06 | -1.58 | 0.86 | 0.007  | 1.321 |
| 11/13/2017 8:13 | 25.28 | 21.45 | 24.17 | 1.34  | 4.40 | 0.012  | 1.246 |
| 11/13/2017 8:14 | 24.50 | 21.63 | 23.86 | -0.78 | 2.17 | 0.000  | 1.216 |
| 11/13/2017 8:15 | 23.52 | 20.20 | 22.88 | -1.28 | 1.34 | 0.000  | 1.196 |
| 11/13/2017 8:16 | 22.77 | 20.63 | 23.67 | -0.62 | 1.57 | 0.007  | 1.219 |
| 11/13/2017 8:17 | 22.97 | 21.98 | 24.77 | -0.22 | 2.31 | -0.002 | 1.241 |
| 11/13/2017 8:18 | 23.23 | 21.89 | 23.86 | 3.88  | 4.23 | -0.006 | 1.238 |
| 11/13/2017 8:19 | 23.47 | 22.08 | 23.72 | 0.83  | 6.10 | 0.089  | 1.229 |
| 11/13/2017 8:20 | 23.32 | 22.23 | 25.58 | 1.41  | 4.12 | 0.034  | 1.167 |
| 11/13/2017 8:21 | 23.60 | 21.41 | 24.79 | -0.02 | 1.58 | 0.000  | 1.162 |
| 11/13/2017 8:22 | 23.70 | 20.88 | 24.02 | -0.90 | 1.60 | 0.012  | 1.185 |
| 11/13/2017 8:23 | 23.68 | 21.23 | 23.63 | -1.10 | 1.35 | 0.007  | 1.171 |
| 11/13/2017 8:24 | 23.22 | 22.28 | 23.36 | -0.91 | 1.80 | -0.007 | 1.147 |
| 11/13/2017 8:25 | 22.72 | 20.10 | 22.61 | -0.88 | 1.30 | 0.002  | 1.152 |
| 11/13/2017 8:26 | 22.25 | 21.08 | 22.57 | -1.09 | 1.35 | 0.002  | 1.172 |
| 11/13/2017 8:27 | 21.95 | 20.03 | 22.95 | -0.41 | 1.58 | -0.011 | 1.198 |
| 11/13/2017 8:28 | 21.98 | 20.70 | 23.14 | -1.26 | 1.11 | -0.004 | 1.193 |
| 11/13/2017 8:29 | 22.02 | 20.07 | 22.75 | -0.39 | 1.72 | 0.006  | 1.153 |
| 11/13/2017 8:30 | 21.80 | 19.73 | 22.27 | 0.48  | 2.01 | -0.003 | 1.092 |
| 11/13/2017 8:31 | 21.38 | 18.47 | 21.75 | 0.48  | 1.95 | -0.007 | 1.098 |
| 11/13/2017 8:32 | 20.92 | 20.47 | 21.98 | 1.88  | 3.33 | 0.010  | 1.105 |
| 11/13/2017 8:33 | 21.08 | 19.77 | 22.51 | 0.18  | 2.03 | 0.009  | 1.115 |
| 11/13/2017 8:34 | 21.28 | 19.43 | 22.01 | 0.36  | 2.17 | 0.003  | 1.111 |

|                 |       |       |       |       |       |       |       |
|-----------------|-------|-------|-------|-------|-------|-------|-------|
| 11/13/2017 8:35 | 21.40 | 20.51 | 21.96 | 0.70  | 1.65  | 0.017 | 1.108 |
| 11/13/2017 8:36 | 21.27 | 19.15 | 22.02 | 0.60  | 1.82  | 0.015 | 1.108 |
| 11/13/2017 8:37 | 21.22 | 21.50 | 22.64 | 0.21  | 1.27  | 0.006 | 1.096 |
| 11/13/2017 8:38 | 21.60 | 19.58 | 23.26 | 0.79  | 2.20  | 0.018 | 1.122 |
| 11/13/2017 8:39 | 22.15 | 22.28 | 24.32 | 1.98  | 3.92  | 0.023 | 1.064 |
| 11/13/2017 8:40 | 22.87 | 22.31 | 23.84 | 0.11  | 1.83  | 0.011 | 1.060 |
| 11/13/2017 8:41 | 23.38 | 21.43 | 23.98 | -0.55 | 1.34  | 0.013 | 1.058 |
| 11/13/2017 8:42 | 23.50 | 20.86 | 23.71 | -0.82 | 1.19  | 0.023 | 1.068 |
| 11/13/2017 8:43 | 23.52 | 20.44 | 24.45 | -0.81 | 1.20  | 0.018 | 1.059 |
| 11/13/2017 8:44 | 23.48 | 22.00 | 24.18 | -0.60 | 1.00  | 0.020 | 1.075 |
| 11/13/2017 8:45 | 23.53 | 21.09 | 23.67 | -0.39 | 1.32  | 0.026 | 1.055 |
| 11/13/2017 8:46 | 23.35 | 21.88 | 23.40 | 0.35  | 1.83  | 0.018 | 1.059 |
| 11/13/2017 8:47 | 23.07 | 21.73 | 23.37 | -0.76 | 1.08  | 0.018 | 1.113 |
| 11/13/2017 8:48 | 22.77 | 21.02 | 23.17 | -0.48 | 1.39  | 0.035 | 1.137 |
| 11/13/2017 8:49 | 22.77 | 21.36 | 23.80 | -0.61 | 1.23  | 0.026 | 1.155 |
| 11/13/2017 8:50 | 22.27 | 15.23 | 18.15 | 6.51  | 39.02 | 0.525 | 1.179 |
| 11/13/2017 8:51 | 19.78 | 18.05 | 19.95 | 4.59  | 35.69 | 0.323 | 1.193 |
| 11/13/2017 8:52 | 19.72 | 21.13 | 24.60 | -0.21 | 1.34  | 0.039 | 1.160 |
| 11/13/2017 8:53 | 20.40 | 20.08 | 23.22 | -0.36 | 1.93  | 0.027 | 1.175 |
| 11/13/2017 8:54 | 22.45 | 18.43 | 22.15 | 1.68  | 5.90  | 0.049 | 1.171 |
| 11/13/2017 8:55 | 22.48 | 21.83 | 23.55 | 0.37  | 1.48  | 0.039 | 1.248 |
| 11/13/2017 8:56 | 22.30 | 22.41 | 23.78 | 0.76  | 1.93  | 0.025 | 1.247 |
| 11/13/2017 8:57 | 23.07 | 21.17 | 24.01 | 0.61  | 1.41  | 0.033 | 1.222 |
| 11/13/2017 8:58 | 23.37 | 23.25 | 24.19 | -0.01 | 1.42  | 0.044 | 1.203 |
| 11/13/2017 8:59 | 23.68 | 23.24 | 24.26 | 0.48  | 2.03  | 0.027 | 1.217 |
| 11/13/2017 9:00 | 23.82 | 22.81 | 24.19 | 0.07  | 0.92  | 0.035 | 1.190 |
| 11/13/2017 9:01 | 23.85 | 21.05 | 23.93 | -0.15 | 0.79  | 0.042 | 1.190 |
| 11/13/2017 9:02 | 23.60 | 22.04 | 23.11 | -0.14 | 1.03  | 0.031 | 1.170 |
| 11/13/2017 9:03 | 23.35 | 22.62 | 23.62 | -0.51 | 0.70  | 0.034 | 1.213 |
| 11/13/2017 9:04 | 23.13 | 21.13 | 23.19 | -0.52 | 1.03  | 0.035 | 1.222 |
| 11/13/2017 9:05 | 23.07 | 20.86 | 23.57 | -0.02 | 1.26  | 0.029 | 1.235 |
| 11/13/2017 9:06 | 23.20 | 22.36 | 23.82 | -0.53 | 0.66  | 0.039 | 1.239 |
| 11/13/2017 9:07 | 23.23 | 20.03 | 23.23 | 0.00  | 1.36  | 0.041 | 1.222 |
| 11/13/2017 9:08 | 23.05 | 21.29 | 22.87 | 0.51  | 1.35  | 0.034 | 1.240 |
| 11/13/2017 9:09 | 23.00 | 21.40 | 24.05 | 0.34  | 1.33  | 0.029 | 1.267 |
| 11/13/2017 9:10 | 23.15 | 21.66 | 23.86 | 0.21  | 1.19  | 0.042 | 1.284 |
| 11/13/2017 9:11 | 23.42 | 21.61 | 23.68 | 0.17  | 1.22  | 0.031 | 1.268 |
| 11/13/2017 9:12 | 23.35 | 21.18 | 23.82 | -0.01 | 0.87  | 0.035 | 1.257 |
| 11/13/2017 9:13 | 23.20 | 20.24 | 23.80 | -0.08 | 1.57  | 0.040 | 1.250 |
| 11/13/2017 9:14 | 23.05 | 19.93 | 22.89 | -0.03 | 1.13  | 0.028 | 1.263 |
| 11/13/2017 9:15 | 23.13 | 22.48 | 23.80 | 0.00  | 1.26  | 0.040 | 1.276 |
| 11/13/2017 9:16 | 23.47 | 22.13 | 24.83 | 0.14  | 1.04  | 0.039 | 1.282 |
| 11/13/2017 9:17 | 23.90 | 21.73 | 24.16 | -0.32 | 0.99  | 0.029 | 1.279 |
| 11/13/2017 9:18 | 24.05 | 22.12 | 24.27 | 0.24  | 1.81  | 0.033 | 1.298 |
| 11/13/2017 9:19 | 23.72 | 21.73 | 23.54 | 1.47  | 2.41  | 0.039 | 1.304 |
| 11/13/2017 9:20 | 23.53 | 23.12 | 24.03 | 1.40  | 2.11  | 0.028 | 1.301 |
| 11/13/2017 9:21 | 23.75 | 23.89 | 25.03 | 0.20  | 1.32  | 0.032 | 1.319 |

|                  |       |       |       |       |       |        |       |
|------------------|-------|-------|-------|-------|-------|--------|-------|
| 11/13/2017 9:22  | 24.32 | 21.59 | 25.36 | -0.38 | 0.78  | 0.040  | 1.319 |
| 11/13/2017 9:23  | 24.85 | 22.53 | 25.55 | -0.34 | 0.71  | 0.029  | 1.324 |
| 11/13/2017 9:24  | 24.93 | 22.52 | 24.70 | -0.23 | 1.04  | 0.033  | 1.329 |
| 11/13/2017 9:25  | 24.35 | 22.08 | 23.61 | 0.31  | 1.21  | 0.046  | 1.348 |
| 11/13/2017 9:26  | 23.80 | 21.13 | 23.64 | 0.68  | 1.72  | 0.035  | 1.348 |
| 11/13/2017 9:27  | 23.40 | 21.70 | 24.08 | 0.75  | 1.58  | 0.030  | 1.356 |
| 11/13/2017 9:28  | 23.72 | 23.71 | 24.98 | -0.19 | 1.02  | 0.039  | 1.334 |
| 11/13/2017 9:29  | 24.28 | 22.71 | 24.95 | -0.08 | 1.31  | 0.034  | 1.309 |
| 11/13/2017 9:30  | 24.63 | 23.59 | 25.04 | -0.15 | 1.12  | 0.030  | 1.318 |
| 11/13/2017 9:31  | 24.82 | 23.63 | 25.22 | 0.01  | 1.64  | 0.036  | 1.322 |
| 11/13/2017 9:32  | 24.57 | 20.72 | 24.12 | 0.50  | 1.80  | 0.039  | 1.298 |
| 11/13/2017 9:33  | 24.62 | 24.30 | 25.57 | -0.10 | 1.00  | 0.028  | 1.310 |
| 11/13/2017 9:34  | 24.68 | 23.21 | 24.87 | -0.20 | 1.44  | 0.040  | 1.325 |
| 11/13/2017 9:35  | 24.68 | 21.92 | 24.61 | 0.02  | 1.83  | 0.036  | 1.326 |
| 11/13/2017 9:36  | 24.40 | 21.28 | 24.00 | 0.13  | 1.45  | 0.027  | 1.330 |
| 11/13/2017 9:37  | 23.92 | 21.76 | 24.01 | 0.17  | 1.85  | 0.042  | 1.348 |
| 11/13/2017 9:38  | 23.83 | 26.20 | 29.02 | 0.20  | 2.20  | 0.406  | 1.669 |
| 11/13/2017 9:39  | 23.65 | 29.52 | 31.72 | 2.25  | 4.77  | 3.056  | 3.116 |
| 11/13/2017 9:40  | 22.98 | 23.13 | 23.46 | 5.54  | 9.99  | 3.773  | 1.910 |
| 11/13/2017 9:41  | 22.57 | 23.82 | 24.00 | 4.73  | 9.08  | 2.959  | 2.326 |
| 11/13/2017 9:42  | 22.28 | 20.67 | 23.49 | 5.53  | 15.70 | 4.665  | 2.732 |
| 11/13/2017 9:43  | 21.92 | 20.62 | 22.68 | 9.94  | 24.93 | 8.269  | 2.797 |
| 11/13/2017 9:44  | 22.07 | 23.21 | 24.48 | 5.12  | 7.72  | 2.991  | 2.619 |
| 11/13/2017 9:45  | 22.42 | 20.18 | 23.14 | 5.40  | 10.03 | 3.151  | 2.586 |
| 11/13/2017 9:46  | 23.00 | 21.10 | 23.85 | 6.02  | 7.74  | 2.810  | 2.678 |
| 11/13/2017 9:47  | 22.33 | 20.84 | 22.16 | 9.03  | 31.67 | 22.672 | 4.394 |
| 11/13/2017 9:48  | 21.80 | 22.29 | 23.44 | 5.02  | 7.99  | 1.271  | 5.319 |
| 11/13/2017 9:49  | 22.73 | 24.33 | 23.99 | 1.77  | 1.03  | 0.139  | 2.754 |
| 11/13/2017 9:50  | 24.52 | 25.63 | 26.26 | 1.09  | 0.98  | 0.035  | 0.946 |
| 11/13/2017 9:51  | 26.05 | 23.62 | 26.63 | 1.12  | 1.41  | 0.258  | 1.028 |
| 11/13/2017 9:52  | 26.53 | 25.48 | 26.96 | 1.01  | 0.98  | 0.054  | 0.796 |
| 11/13/2017 9:53  | 26.70 | 23.38 | 25.94 | 0.50  | 0.94  | 0.031  | 0.879 |
| 11/13/2017 9:54  | 26.77 | 23.68 | 25.44 | 0.15  | 0.77  | 0.046  | 5.528 |
| 11/13/2017 9:55  | 26.78 | 23.75 | 26.93 | -0.19 | 0.74  | 0.035  | 6.462 |
| 11/13/2017 9:56  | 26.70 | 26.12 | 26.83 | -0.51 | 0.95  | 0.022  | 1.653 |
| 11/13/2017 9:57  |       | 24.93 | 27.41 | -0.71 | 0.69  | 0.040  | 5.970 |
| 11/13/2017 9:58  |       | 25.13 | 26.20 | -0.81 | 0.91  | 0.042  | 5.784 |
| 11/13/2017 9:59  |       | 25.22 | 27.39 | -1.03 | 0.77  | 0.014  | 6.941 |
| 11/13/2017 10:00 |       | 24.35 | 27.32 | -0.71 | 1.65  | 0.565  | 6.886 |
| 11/13/2017 10:01 |       | 25.85 | 26.58 | 1.10  | 2.66  | 1.378  | 1.486 |
| 11/13/2017 10:02 |       | 26.40 | 27.40 | 0.79  | 0.90  | 0.042  | 1.158 |
| 11/13/2017 10:03 |       | 25.93 | 27.18 | 0.54  | 1.23  | 0.248  | 0.885 |
| 11/13/2017 10:04 |       | 22.02 | 24.52 | 3.46  | 43.58 | 0.710  | 4.258 |
| 11/13/2017 10:05 |       | 22.73 | 27.11 | 1.93  | 10.82 | 0.173  | 6.636 |
| 11/13/2017 10:06 |       | 26.36 | 28.35 | 0.22  | 1.59  | 0.054  | 7.764 |
| 11/13/2017 10:07 |       | 25.43 | 31.44 | -0.60 | 1.24  | 0.219  | 3.691 |
| 11/13/2017 10:08 |       | 25.53 | 30.86 | -0.85 | 1.14  | 0.108  | 7.998 |



|                  |      |        |         |        |        |        |        |
|------------------|------|--------|---------|--------|--------|--------|--------|
| 11/13/2017 10:09 |      | 24.86  | 27.92   | 0.04   | 2.43   | 1.157  | 5.263  |
| 11/13/2017 10:10 |      | 22.17  | 25.74   | 6.28   | 11.73  | 5.610  | 0.894  |
| 11/13/2017 10:11 |      | 24.12  | 26.36   | 5.06   | 8.77   | 4.723  | 0.928  |
| 11/13/2017 10:12 |      | 22.94  | 25.87   | 6.76   | 12.49  | 6.361  | 0.965  |
| 11/13/2017 10:13 |      | 23.39  | 25.59   | 5.27   | 10.47  | 5.660  | 0.975  |
| 11/13/2017 10:14 |      | 25.54  | 26.56   | 8.95   | 11.72  | 6.181  | 0.988  |
| 11/13/2017 10:15 |      | 23.21  | 26.20   | 10.06  | 13.36  | 7.322  | 0.978  |
| 11/13/2017 10:16 |      | 23.81  | 26.44   | 9.99   | 10.17  | 5.153  | 0.919  |
| 11/13/2017 10:17 |      | 24.43  | 26.87   | 4.86   | 8.01   | 3.871  | 0.810  |
| 11/13/2017 10:18 |      | 23.93  | 26.87   | 4.82   | 8.78   | 4.777  | 0.864  |
| 11/13/2017 10:19 |      | 24.24  | 27.15   | 2.72   | 5.37   | 2.622  | 0.738  |
| 11/13/2017 10:20 |      | 23.38  | 27.07   | 0.53   | 3.44   | 1.454  | 0.628  |
| 11/13/2017 10:21 |      | 24.44  | 26.95   | 0.97   | 4.81   | 2.329  | 0.665  |
| 11/13/2017 10:22 |      | 22.30  | 26.52   | 2.66   | 8.02   | 4.055  | 0.706  |
| 11/13/2017 10:23 |      | 22.21  | 26.43   | 8.41   | 14.36  | 6.811  | 0.804  |
| 11/13/2017 10:24 |      | 22.16  | 25.38   | 11.19  | 20.06  | 7.134  | 0.800  |
| 11/13/2017 10:25 |      | 22.96  | 24.80   | 7.26   | 14.34  | 2.033  | 0.610  |
| 11/13/2017 10:26 |      | 21.19  | 24.43   | 5.21   | 16.49  | 0.056  | 0.531  |
| 11/13/2017 10:27 |      | 22.93  | 26.03   | 0.29   | 6.96   | 0.019  | 0.504  |
| 11/13/2017 10:28 |      | 23.30  | 26.02   | 0.66   | 6.16   | 0.024  | 0.523  |
| 11/13/2017 10:29 | 1.17 | 26.87  | 75.76   | 84.00  | 61.15  | 1.637  | 1.085  |
| 11/13/2017 10:30 | 0.85 | 45.05  | 263.68  | 220.59 | 254.65 | 12.480 | 3.183  |
| 11/13/2017 10:31 | 0.43 | 27.78  | 155.93  | 154.53 | 216.83 | 8.237  | 2.547  |
| 11/13/2017 10:32 | 0.22 | 18.98  | 101.47  | 82.20  | 131.79 | 6.226  | 2.090  |
| 11/13/2017 10:33 | 0.35 | 15.39  | 35.26   | 41.77  | 37.58  | 0.857  | 1.137  |
| 11/13/2017 10:34 | 0.40 | 51.18  | 242.92  | 179.32 | 166.33 | 6.099  | 2.523  |
| 11/13/2017 10:35 | 0.37 | 100.28 | 651.79  | 213.56 | 189.55 | 24.715 | 6.978  |
| 11/13/2017 10:36 | 0.22 | 41.24  | 293.04  | 130.98 | 166.18 | 14.602 | 5.169  |
| 11/13/2017 10:37 | 0.20 | 21.02  | 127.02  | 117.68 | 131.33 | 4.870  | 2.385  |
| 11/13/2017 10:38 | 0.10 | 53.39  | 251.11  | 153.53 | 172.73 | 9.468  | 3.074  |
| 11/13/2017 10:39 | 0.10 | 72.52  | 494.26  | 171.14 | 275.07 | 20.281 | 6.068  |
| 11/13/2017 10:40 | 0.05 | 33.97  | 237.18  | 149.72 | 224.92 | 9.950  | 4.066  |
| 11/13/2017 10:41 | 0.02 | 32.49  | 192.48  | 237.94 | 252.50 | 8.042  | 2.790  |
| 11/13/2017 10:42 | 0.02 | 131.54 | 776.77  | 632.85 | 609.65 | 30.125 | 7.195  |
| 11/13/2017 10:43 | 0.00 | 196.84 | 1178.03 | 747.96 | 703.30 | 45.752 | 13.164 |
| 11/13/2017 10:44 | 0.00 | 331.58 | 2112.50 | 443.29 | 362.83 | 69.638 | 22.634 |
| 11/13/2017 10:45 | 0.00 | 190.21 | 1317.91 | 319.97 | 310.27 | 46.378 | 18.571 |
| 11/13/2017 10:46 | 0.05 | 75.95  | 563.49  | 196.42 | 204.77 | 20.831 | 9.449  |
| 11/13/2017 10:47 | 0.17 | 132.13 | 706.82  | 279.17 | 293.93 | 22.977 | 7.399  |
| 11/13/2017 10:48 | 0.20 | 143.02 | 933.25  | 602.17 | 510.00 | 36.435 | 12.378 |
| 11/13/2017 10:49 | 0.18 | 110.95 | 884.92  | 254.16 | 239.77 | 36.241 | 12.060 |
| 11/13/2017 10:50 | 0.22 | 40.48  | 333.02  | 188.80 | 211.15 | 14.424 | 6.332  |
| 11/13/2017 10:51 | 0.40 | 22.66  | 205.31  | 163.61 | 221.65 | 7.804  | 3.478  |
| 11/13/2017 10:52 | 0.50 | 29.87  | 205.24  | 228.41 | 284.53 | 9.257  | 3.593  |
| 11/13/2017 10:53 | 0.43 | 95.68  | 474.62  | 366.89 | 438.32 | 19.836 | 5.847  |
| 11/13/2017 10:54 | 0.40 | 138.93 | 856.48  | 214.33 | 142.18 | 28.600 | 10.386 |
| 11/13/2017 10:55 | 0.42 | 61.43  | 453.15  | 135.39 | 121.85 | 16.997 | 7.860  |

|                  |      |       |        |        |        |        |       |
|------------------|------|-------|--------|--------|--------|--------|-------|
| 11/13/2017 10:56 | 0.62 | 43.79 | 335.35 | 104.98 | 89.92  | 11.189 | 5.006 |
| 11/13/2017 10:57 | 0.72 | 42.15 | 276.78 | 149.00 | 142.21 | 9.873  | 4.041 |
| 11/13/2017 10:58 | 0.97 | 21.76 | 164.75 | 126.33 | 82.39  | 6.881  | 3.355 |
| 11/13/2017 10:59 | 1.18 | 21.08 | 145.15 | 76.35  | 62.94  | 4.875  | 2.568 |
| 11/13/2017 11:00 | 1.25 | 65.87 | 352.25 | 133.18 | 120.59 | 13.415 | 4.365 |
| 11/13/2017 11:01 | 1.02 | 62.74 | 371.85 | 141.14 | 199.90 | 17.043 | 6.187 |
| 11/13/2017 11:02 | 1.08 | 4.73  | 53.23  | 43.30  | 36.12  | 2.402  | 2.514 |
| 11/13/2017 11:03 | 1.43 | 6.28  | 55.85  | 37.94  | 39.91  | 1.757  | 1.451 |
| 11/13/2017 11:04 | 1.77 | 11.09 | 57.97  | 41.01  | 63.91  | 2.699  | 1.644 |
| 11/13/2017 11:05 | 1.87 | 14.33 | 53.80  | 87.61  | 72.93  | 3.779  | 1.790 |
| 11/13/2017 11:06 | 1.87 | 5.13  | 35.12  | 35.54  | 35.06  | 2.805  | 1.726 |
| 11/13/2017 11:07 | 2.30 | 8.19  | 33.79  | 29.80  | 18.83  | 1.444  | 1.288 |
| 11/13/2017 11:08 | 2.53 | 51.99 | 258.45 | 108.08 | 98.05  | 9.522  | 2.922 |
| 11/13/2017 11:09 | 2.35 | 39.13 | 220.08 | 98.65  | 86.19  | 9.030  | 3.939 |
| 11/13/2017 11:10 | 1.93 | 38.22 | 210.38 | 123.18 | 101.78 | 7.793  | 3.373 |
| 11/13/2017 11:11 | 1.45 | 25.67 | 163.24 | 102.46 | 116.18 | 8.583  | 3.627 |
| 11/13/2017 11:12 | 1.55 | 22.53 | 133.63 | 73.03  | 40.62  | 4.107  | 2.187 |
| 11/13/2017 11:13 | 1.68 | 24.51 | 140.47 | 71.64  | 56.39  | 5.517  | 2.519 |
| 11/13/2017 11:14 | 2.03 | 14.58 | 104.04 | 45.40  | 33.69  | 4.831  | 2.489 |
| 11/13/2017 11:15 | 2.17 | 11.99 | 69.93  | 37.74  | 18.21  | 2.783  | 1.762 |
| 11/13/2017 11:16 | 2.50 | 6.78  | 26.64  | 36.63  | 18.21  | 1.897  | 1.360 |
| 11/13/2017 11:17 | 2.88 | 4.52  | 18.85  | 26.00  | 14.53  | 1.446  | 1.138 |
| 11/13/2017 11:18 | 3.00 | 5.50  | 23.48  | 40.17  | 28.39  | 1.425  | 1.099 |
| 11/13/2017 11:19 | 2.92 | 4.27  | 10.23  | 30.72  | 39.84  | 1.284  | 1.091 |
| 11/13/2017 11:20 | 2.72 | 11.81 | 47.82  | 73.55  | 103.97 | 3.163  | 1.306 |
| 11/13/2017 11:21 | 2.45 | 20.88 | 91.74  | 42.88  | 71.40  | 4.647  | 2.072 |
| 11/13/2017 11:22 | 2.53 | 21.23 | 110.89 | 46.08  | 47.71  | 3.672  | 1.949 |
| 11/13/2017 11:23 | 2.42 | 15.20 | 79.77  | 42.18  | 47.06  | 3.326  | 1.920 |
| 11/13/2017 11:24 | 2.83 | 5.01  | 17.58  | 24.34  | 18.72  | 1.016  | 1.246 |
| 11/13/2017 11:25 | 3.20 | 4.95  | 11.96  | 20.22  | 13.21  | 0.508  | 0.986 |
| 11/13/2017 11:26 | 3.60 | 4.61  | 13.92  | 20.91  | 16.44  | 0.670  | 1.011 |
| 11/13/2017 11:27 | 3.63 | 5.38  | 14.68  | 21.80  | 20.28  | 0.841  | 1.028 |
| 11/13/2017 11:28 | 3.73 | 4.79  | 8.46   | 17.13  | 12.20  | 0.537  | 0.970 |
| 11/13/2017 11:29 | 3.98 | 4.97  | 5.92   | 18.54  | 13.16  | 0.621  | 0.942 |
| 11/13/2017 11:30 | 4.38 | 5.28  | 2.59   | 14.10  | 8.43   | 0.405  | 0.908 |
| 11/13/2017 11:31 | 4.57 | 5.70  | 4.07   | 19.38  | 21.67  | 0.731  | 0.910 |
| 11/13/2017 11:32 | 4.50 | 9.88  | 32.80  | 41.85  | 55.11  | 1.906  | 1.130 |
| 11/13/2017 11:33 | 4.08 | 14.37 | 47.49  | 52.85  | 43.02  | 2.352  | 1.401 |
| 11/13/2017 11:34 | 3.32 | 78.98 | 418.38 | 114.22 | 145.35 | 14.191 | 4.270 |
| 11/13/2017 11:35 | 2.55 | 34.79 | 241.89 | 68.50  | 76.00  | 9.816  | 4.677 |
| 11/13/2017 11:36 | 2.25 | 14.60 | 92.62  | 55.19  | 70.44  | 3.408  | 2.114 |
| 11/13/2017 11:37 | 2.48 | 11.16 | 72.98  | 52.66  | 52.13  | 2.289  | 1.583 |
| 11/13/2017 11:38 | 2.65 | 14.13 | 83.23  | 55.01  | 72.19  | 3.374  | 1.793 |
| 11/13/2017 11:39 | 2.67 | 9.12  | 47.39  | 54.65  | 76.36  | 2.308  | 1.415 |
| 11/13/2017 11:40 | 2.40 | 8.54  | 46.20  | 42.02  | 52.04  | 2.151  | 1.425 |
| 11/13/2017 11:41 | 2.57 | 10.54 | 42.34  | 49.80  | 63.76  | 2.146  | 1.367 |
| 11/13/2017 11:42 | 2.65 | 8.04  | 31.55  | 56.84  | 97.60  | 2.941  | 1.510 |

|                  |      |        |         |        |        |        |        |
|------------------|------|--------|---------|--------|--------|--------|--------|
| 11/13/2017 11:43 | 2.65 | 24.18  | 99.49   | 129.57 | 197.90 | 5.581  | 1.821  |
| 11/13/2017 11:44 | 2.10 | 30.88  | 157.56  | 183.63 | 443.73 | 11.394 | 3.056  |
| 11/13/2017 11:45 | 1.42 | 50.28  | 254.80  | 255.56 | 449.90 | 12.994 | 3.493  |
| 11/13/2017 11:46 | 0.93 | 38.55  | 217.11  | 219.73 | 556.95 | 15.427 | 4.634  |
| 11/13/2017 11:47 | 0.88 | 53.58  | 300.78  | 294.90 | 559.47 | 15.310 | 4.092  |
| 11/13/2017 11:48 | 0.90 | 21.68  | 139.42  | 166.57 | 445.47 | 9.797  | 3.568  |
| 11/13/2017 11:49 | 0.93 | 38.05  | 211.39  | 244.01 | 489.20 | 11.498 | 3.610  |
| 11/13/2017 11:50 | 1.05 | 35.48  | 196.53  | 279.10 | 280.17 | 8.653  | 3.211  |
| 11/13/2017 11:51 | 1.10 | 73.11  | 426.20  | 283.66 | 428.20 | 15.521 | 4.787  |
| 11/13/2017 11:52 | 0.97 | 89.35  | 540.34  | 333.53 | 422.17 | 22.915 | 7.118  |
| 11/13/2017 11:53 | 0.65 | 74.33  | 479.27  | 396.13 | 442.37 | 21.219 | 6.938  |
| 11/13/2017 11:54 | 0.60 | 150.79 | 885.20  | 239.62 | 231.55 | 27.586 | 8.410  |
| 11/13/2017 11:55 | 0.68 | 82.70  | 548.74  | 151.79 | 159.42 | 20.572 | 8.837  |
| 11/13/2017 11:56 | 0.85 | 53.53  | 426.13  | 116.28 | 117.22 | 14.888 | 5.811  |
| 11/13/2017 11:57 | 1.00 | 36.43  | 304.80  | 96.96  | 90.64  | 9.912  | 4.272  |
| 11/13/2017 11:58 | 1.23 | 10.73  | 129.65  | 59.06  | 52.66  | 4.578  | 2.839  |
| 11/13/2017 11:59 | 1.57 | 10.22  | 113.84  | 72.96  | 44.88  | 2.678  | 1.879  |
| 11/13/2017 12:00 | 1.70 | 18.36  | 136.90  | 67.67  | 75.23  | 4.974  | 2.471  |
| 11/13/2017 12:01 | 1.73 | 20.01  | 126.80  | 119.21 | 88.01  | 4.715  | 2.286  |
| 11/13/2017 12:02 | 1.47 | 13.56  | 110.01  | 101.31 | 103.87 | 5.235  | 2.454  |
| 11/13/2017 12:03 | 1.37 | 31.71  | 196.65  | 108.06 | 91.47  | 6.532  | 2.669  |
| 11/13/2017 12:04 | 1.13 | 48.73  | 259.40  | 110.13 | 113.77 | 11.301 | 4.169  |
| 11/13/2017 12:05 | 1.22 | 22.88  | 161.07  | 110.13 | 133.42 | 8.017  | 3.456  |
| 11/13/2017 12:06 | 1.38 | 12.03  | 89.67   | 86.00  | 90.41  | 4.421  | 2.223  |
| 11/13/2017 12:07 | 1.60 | 4.43   | 43.27   | 51.69  | 74.70  | 2.935  | 1.777  |
| 11/13/2017 12:08 | 1.80 | 10.32  | 63.04   | 70.72  | 71.40  | 3.029  | 1.490  |
| 11/13/2017 12:09 | 1.70 | 17.53  | 88.18   | 112.55 | 174.10 | 5.861  | 2.071  |
| 11/13/2017 12:10 | 1.50 | 24.46  | 111.67  | 126.81 | 211.17 | 7.337  | 2.551  |
| 11/13/2017 12:11 | 1.33 | 6.94   | 44.09   | 75.75  | 117.58 | 4.241  | 2.091  |
| 11/13/2017 12:12 | 1.58 | 8.15   | 42.36   | 70.16  | 119.67 | 3.265  | 1.554  |
| 11/13/2017 12:13 | 1.83 | 34.94  | 160.60  | 115.22 | 137.51 | 6.754  | 2.366  |
| 11/13/2017 12:14 | 1.70 | 43.78  | 226.90  | 147.06 | 280.71 | 15.162 | 4.378  |
| 11/13/2017 12:15 | 1.42 | 14.99  | 95.86   | 84.21  | 155.18 | 7.371  | 2.998  |
| 11/13/2017 12:16 | 1.30 | 17.04  | 92.66   | 121.72 | 206.40 | 6.122  | 2.196  |
| 11/13/2017 12:17 | 1.33 | 13.36  | 72.69   | 97.65  | 161.18 | 5.088  | 2.073  |
| 11/13/2017 12:18 | 1.38 | 5.30   | 33.28   | 77.02  | 136.90 | 3.866  | 1.764  |
| 11/13/2017 12:19 | 1.43 | 5.10   | 25.34   | 73.33  | 120.09 | 2.882  | 1.442  |
| 11/13/2017 12:20 | 1.58 | 3.08   | 21.49   | 69.21  | 107.88 | 2.694  | 1.440  |
| 11/13/2017 12:21 | 1.68 | 1.30   | 10.79   | 55.62  | 81.42  | 2.003  | 2.135  |
| 11/13/2017 12:22 | 1.87 | 0.69   | 5.98    | 39.32  | 44.32  | 1.227  | 2.541  |
| 11/13/2017 12:23 | 2.03 | 2.87   | 20.01   | 44.72  | 67.90  | 1.820  | 2.986  |
| 11/13/2017 12:24 | 2.68 | 1.32   | -3.94   | 16.60  | 10.86  | 0.963  | 2.823  |
| 11/13/2017 12:25 | 3.48 | 8.00   | 16.52   | 50.66  | 52.22  | 0.969  | 2.160  |
| 11/13/2017 12:26 | 3.33 | 29.23  | 140.42  | 190.55 | 386.56 | 9.172  | 3.150  |
| 11/13/2017 12:27 | 2.47 | 63.94  | 288.11  | 330.98 | 433.28 | 13.741 | 4.181  |
| 11/13/2017 12:28 | 1.07 | 201.03 | 1002.37 | 901.53 | 879.99 | 42.999 | 10.278 |
| 11/13/2017 12:29 | 0.53 | 185.92 | 870.67  | 439.82 | 681.33 | 51.259 | 15.454 |

|                  |      |        |        |        |        |        |       |
|------------------|------|--------|--------|--------|--------|--------|-------|
| 11/13/2017 12:30 | 0.32 | 60.88  | 442.23 | 264.15 | 538.82 | 24.817 | 8.830 |
| 11/13/2017 12:31 | 0.37 | 21.35  | 186.23 | 192.94 | 413.36 | 10.120 | 3.837 |
| 11/13/2017 12:32 | 0.50 | 32.72  | 207.20 | 179.42 | 381.30 | 8.859  | 3.233 |
| 11/13/2017 12:33 | 0.60 | 148.31 | 829.65 | 313.49 | 437.68 | 29.654 | 8.783 |
| 11/13/2017 12:34 | 0.60 | 51.48  | 387.29 | 254.11 | 494.01 | 24.297 | 8.048 |
| 11/13/2017 12:35 | 0.57 | 50.15  | 295.36 | 197.85 | 208.33 | 9.518  | 4.131 |
| 11/13/2017 12:36 | 0.55 | 36.96  | 253.40 | 244.35 | 506.37 | 15.240 | 4.990 |
| 11/13/2017 12:37 | 0.65 | 20.83  | 153.98 | 196.01 | 370.76 | 9.140  | 3.275 |
| 11/13/2017 12:38 | 0.68 | 13.28  | 97.59  | 152.74 | 298.36 | 6.432  | 2.528 |
| 11/13/2017 12:39 | 0.75 | 7.94   | 75.68  | 105.90 | 186.66 | 4.596  | 2.150 |
| 11/13/2017 12:40 | 0.90 | 13.78  | 87.20  | 148.28 | 224.33 | 5.489  | 2.054 |
| 11/13/2017 12:41 | 0.92 | 6.32   | 52.47  | 82.14  | 131.71 | 3.788  | 1.996 |
| 11/13/2017 12:42 | 1.10 | 9.64   | 62.27  | 77.21  | 47.43  | 3.005  | 1.707 |
| 11/13/2017 12:43 | 1.37 | 8.19   | 50.45  | 76.19  | 45.94  | 2.760  | 1.697 |
| 11/13/2017 12:44 | 1.48 | 23.41  | 132.41 | 96.38  | 78.48  | 5.661  | 2.255 |
| 11/13/2017 12:45 | 1.35 | 68.41  | 291.52 | 129.70 | 174.68 | 16.377 | 4.772 |
| 11/13/2017 12:46 | 1.02 | 35.17  | 170.23 | 109.37 | 150.91 | 9.661  | 4.294 |
| 11/13/2017 12:47 | 0.97 | 23.54  | 135.97 | 91.53  | 90.76  | 7.602  | 3.358 |
| 11/13/2017 12:48 | 1.40 | 16.06  | 85.49  | 71.26  | 30.97  | 4.229  | 1.878 |
| 11/13/2017 12:49 | 1.50 | 11.99  | 93.15  | 83.34  | 82.13  | 6.204  | 2.563 |
| 11/13/2017 12:50 | 1.42 | 30.79  | 156.51 | 91.69  | 62.76  | 6.112  | 2.505 |
| 11/13/2017 12:51 | 1.00 | 33.67  | 206.83 | 106.19 | 76.43  | 9.512  | 3.622 |
| 11/13/2017 12:52 | 1.12 | 19.52  | 123.52 | 66.41  | 33.24  | 5.112  | 2.614 |
| 11/13/2017 12:53 | 1.23 | 15.38  | 98.53  | 54.04  | 30.92  | 4.487  | 2.342 |
| 11/13/2017 12:54 | 1.52 | 5.58   | 48.39  | 31.17  | 17.62  | 2.574  | 1.784 |
| 11/13/2017 12:55 | 1.97 | 1.78   | 16.84  | 18.16  | 6.41   | 0.691  | 1.179 |
| 11/13/2017 12:56 | 2.38 | 5.28   | 21.09  | 14.97  | 5.47   | 0.491  | 1.090 |
| 11/13/2017 12:57 | 2.45 | 22.47  | 111.55 | 75.04  | 44.28  | 4.695  | 1.919 |
| 11/13/2017 12:58 | 2.05 | 10.59  | 54.32  | 54.92  | 43.26  | 3.224  | 1.971 |
| 11/13/2017 12:59 | 2.07 | 4.29   | 19.82  | 31.66  | 10.45  | 1.165  | 1.288 |
| 11/13/2017 13:00 | 2.10 | 7.77   | 40.15  | 54.65  | 22.47  | 1.878  | 1.286 |
| 11/13/2017 13:01 | 2.03 | 17.34  | 81.27  | 58.80  | 37.92  | 3.813  | 1.875 |
| 11/13/2017 13:02 | 1.82 | 9.15   | 47.77  | 35.03  | 18.88  | 2.561  | 1.734 |
| 11/13/2017 13:03 | 1.90 | 9.67   | 45.14  | 32.52  | 13.66  | 1.956  | 1.494 |
| 11/13/2017 13:04 | 2.22 | 8.34   | 45.84  | 37.41  | 15.69  | 2.181  | 1.482 |
| 11/13/2017 13:05 | 2.40 | 3.25   | 12.93  | 29.40  | 10.96  | 0.799  | 1.211 |
| 11/13/2017 13:06 | 2.37 | 7.08   | 36.82  | 29.40  | 15.77  | 1.272  | 1.200 |
| 11/13/2017 13:07 | 2.27 | 7.80   | 31.26  | 26.42  | 21.35  | 2.196  | 1.471 |
| 11/13/2017 13:08 | 2.33 | 6.79   | 35.05  | 31.70  | 21.07  | 1.793  | 1.343 |
| 11/13/2017 13:09 | 2.37 | 6.27   | 25.95  | 32.83  | 26.02  | 1.481  | 1.300 |
| 11/13/2017 13:10 | 2.57 | 4.61   | 17.30  | 23.54  | 16.21  | 1.069  | 1.220 |
| 11/13/2017 13:11 | 2.63 | 7.70   | 23.43  | 32.28  | 26.37  | 1.412  | 1.200 |
| 11/13/2017 13:12 | 2.67 | 5.28   | 16.56  | 18.93  | 17.14  | 1.034  | 1.173 |
| 11/13/2017 13:13 | 2.88 | 5.71   | 19.35  | 12.12  | 4.05   | 0.580  | 1.109 |
| 11/13/2017 13:14 | 3.15 | 5.10   | 10.93  | 10.59  | 3.38   | 0.352  | 1.009 |
| 11/13/2017 13:15 | 3.58 | 6.04   | 28.11  | 10.31  | 3.77   | 0.382  | 0.889 |
| 11/13/2017 13:16 | 3.78 | 6.61   | 21.59  | 11.74  | 5.71   | 0.425  | 1.108 |

|                  |      |        |        |        |         |        |       |
|------------------|------|--------|--------|--------|---------|--------|-------|
| 11/13/2017 13:17 | 3.88 | 7.44   | 26.44  | 11.37  | 3.60    | 0.460  | 1.081 |
| 11/13/2017 13:18 | 3.93 | 6.93   | 24.03  | 6.90   | 3.86    | 0.282  | 1.028 |
| 11/13/2017 13:19 | 3.95 | 6.10   | 17.54  | 12.25  | 8.43    | 0.494  | 1.028 |
| 11/13/2017 13:20 | 3.48 | 5.86   | 15.34  | 40.41  | 48.72   | 1.905  | 1.293 |
| 11/13/2017 13:21 | 2.90 | 5.36   | 14.11  | 30.66  | 35.96   | 1.463  | 1.291 |
| 11/13/2017 13:22 | 2.45 | 11.93  | 43.56  | 61.71  | 77.42   | 2.679  | 1.376 |
| 11/13/2017 13:23 | 1.92 | 19.78  | 88.10  | 89.58  | 157.76  | 5.729  | 2.136 |
| 11/13/2017 13:24 | 1.52 | 33.67  | 158.27 | 155.72 | 320.48  | 9.769  | 2.767 |
| 11/13/2017 13:25 | 1.05 | 53.38  | 229.08 | 190.48 | 287.51  | 10.080 | 3.340 |
| 11/13/2017 13:26 | 0.88 | 48.33  | 263.08 | 242.90 | 480.00  | 17.680 | 5.107 |
| 11/13/2017 13:27 | 0.82 | 37.35  | 185.11 | 135.23 | 222.06  | 8.613  | 3.113 |
| 11/13/2017 13:28 | 0.77 | 41.07  | 210.60 | 183.02 | 239.84  | 9.436  | 3.363 |
| 11/13/2017 13:29 | 0.70 | 53.00  | 284.57 | 266.77 | 700.19  | 19.983 | 5.122 |
| 11/13/2017 13:30 | 0.75 | 13.66  | 104.03 | 102.58 | 159.09  | 5.340  | 2.709 |
| 11/13/2017 13:31 | 0.98 | 39.73  | 192.25 | 184.26 | 236.46  | 8.473  | 2.617 |
| 11/13/2017 13:32 | 0.98 | 35.53  | 191.27 | 245.87 | 547.89  | 15.247 | 4.133 |
| 11/13/2017 13:33 | 0.75 | 36.25  | 184.20 | 258.63 | 615.51  | 14.737 | 3.861 |
| 11/13/2017 13:34 | 0.45 | 34.78  | 174.70 | 215.42 | 545.24  | 14.122 | 4.040 |
| 11/13/2017 13:35 | 0.93 | 14.99  | 80.86  | 56.57  | 45.91   | 1.440  | 1.948 |
| 11/13/2017 13:36 | 1.20 | 79.21  | 383.08 | 299.17 | 479.23  | 17.828 | 4.576 |
| 11/13/2017 13:37 | 1.15 | 59.53  | 294.60 | 370.81 | 942.52  | 24.700 | 6.270 |
| 11/13/2017 13:38 | 0.55 | 78.59  | 329.89 | 421.77 | 992.02  | 23.262 | 5.478 |
| 11/13/2017 13:39 | 0.25 | 41.27  | 244.19 | 274.69 | 793.47  | 20.132 | 5.687 |
| 11/13/2017 13:40 | 0.47 | 58.24  | 288.66 | 218.17 | 230.95  | 8.445  | 3.416 |
| 11/13/2017 13:41 | 0.57 | 51.08  | 299.17 | 262.24 | 559.19  | 18.118 | 5.511 |
| 11/13/2017 13:42 | 0.63 | 75.29  | 435.46 | 288.75 | 657.53  | 23.913 | 6.120 |
| 11/13/2017 13:43 | 0.63 | 27.93  | 148.40 | 115.77 | 196.28  | 6.230  | 3.591 |
| 11/13/2017 13:44 | 0.65 | 72.72  | 364.14 | 312.70 | 545.89  | 19.263 | 5.455 |
| 11/13/2017 13:45 | 0.78 | 23.82  | 166.49 | 86.43  | 296.32  | 7.560  | 3.794 |
| 11/13/2017 13:46 | 0.72 | 167.28 | 786.14 | 438.09 | 695.53  | 35.742 | 8.949 |
| 11/13/2017 13:47 | 0.63 | 24.33  | 215.20 | 175.83 | 485.58  | 15.639 | 6.095 |
| 11/13/2017 13:48 | 0.65 | 124.94 | 621.47 | 314.55 | 403.86  | 21.044 | 5.743 |
| 11/13/2017 13:49 | 0.50 | 88.75  | 474.99 | 448.89 | 1029.86 | 33.523 | 9.666 |
| 11/13/2017 13:50 | 0.48 | 52.04  | 304.14 | 382.15 | 771.54  | 21.397 | 5.827 |
| 11/13/2017 13:51 | 0.48 | 3.23   | 101.01 | 114.68 | 294.79  | 7.561  | 3.232 |
| 11/13/2017 13:52 | 1.02 | -0.10  | 53.88  | 53.15  | 13.13   | 0.609  | 1.331 |
| 11/13/2017 13:53 | 1.53 | 17.14  | 90.26  | 90.22  | 91.05   | 4.171  | 1.578 |
| 11/13/2017 13:54 | 1.57 | 51.84  | 271.06 | 249.31 | 641.67  | 22.570 | 4.986 |
| 11/13/2017 13:55 | 1.47 | -1.26  | 17.02  | 37.84  | 35.37   | 2.926  | 2.145 |
| 11/13/2017 13:56 | 1.53 | 3.18   | 35.45  | 52.28  | 43.93   | 2.586  | 1.475 |
| 11/13/2017 13:57 | 1.52 | 22.35  | 105.56 | 166.14 | 301.00  | 7.771  | 2.186 |
| 11/13/2017 13:58 | 1.13 | 34.92  | 152.42 | 226.14 | 432.45  | 11.610 | 3.236 |
| 11/13/2017 13:59 | 0.57 | 27.53  | 136.65 | 208.73 | 465.25  | 12.670 | 3.584 |
| 11/13/2017 14:00 | 0.45 | 25.17  | 109.99 | 195.15 | 352.42  | 9.200  | 2.874 |
| 11/13/2017 14:01 | 0.50 | 24.73  | 125.69 | 197.05 | 399.53  | 10.568 | 3.047 |
| 11/13/2017 14:02 | 0.50 | 52.24  | 239.41 | 247.17 | 492.53  | 16.181 | 4.459 |
| 11/13/2017 14:03 | 0.50 | 14.28  | 89.61  | 127.98 | 226.33  | 6.637  | 2.866 |

|                  |      |        |        |        |         |        |        |
|------------------|------|--------|--------|--------|---------|--------|--------|
| 11/13/2017 14:04 | 0.63 | 9.46   | 55.98  | 91.11  | 156.63  | 4.346  | 2.053  |
| 11/13/2017 14:05 | 0.75 | 54.37  | 237.42 | 222.36 | 389.55  | 13.248 | 3.547  |
| 11/13/2017 14:06 | 0.70 | 29.24  | 157.70 | 324.50 | 514.30  | 14.692 | 4.356  |
| 11/13/2017 14:07 | 0.55 | 17.23  | 98.29  | 326.35 | 309.67  | 7.715  | 2.683  |
| 11/13/2017 14:08 | 0.50 | 6.81   | 53.90  | 150.54 | 193.45  | 4.926  | 2.112  |
| 11/13/2017 14:09 | 0.67 | 17.36  | 87.30  | 115.80 | 199.33  | 5.655  | 2.119  |
| 11/13/2017 14:10 | 0.67 | 69.27  | 308.05 | 275.93 | 555.73  | 17.236 | 4.460  |
| 11/13/2017 14:11 | 0.52 | 70.92  | 339.88 | 332.46 | 673.23  | 21.417 | 6.103  |
| 11/13/2017 14:12 | 0.30 | 92.18  | 429.15 | 295.86 | 670.80  | 24.035 | 6.925  |
| 11/13/2017 14:13 | 0.28 | 123.88 | 524.56 | 500.93 | 945.73  | 30.935 | 8.006  |
| 11/13/2017 14:14 | 0.30 | 133.58 | 540.48 | 738.56 | 1761.67 | 42.067 | 10.532 |
| 11/13/2017 14:15 | 0.25 | 84.29  | 413.95 | 528.78 | 1531.70 | 36.253 | 9.414  |
| 11/13/2017 14:16 | 0.20 | 83.69  | 364.79 | 587.52 | 1061.40 | 24.482 | 6.494  |
| 11/13/2017 14:17 | 0.20 | 74.82  | 362.58 | 528.35 | 1287.67 | 30.250 | 7.656  |
| 11/13/2017 14:18 | 0.20 | 89.38  | 393.21 | 628.33 | 1527.50 | 32.310 | 7.812  |
| 11/13/2017 14:19 | 0.23 | 79.02  | 341.75 | 550.63 | 1374.00 | 31.157 | 7.806  |
| 11/13/2017 14:20 | 0.30 | 94.87  | 404.39 | 581.31 | 1314.50 | 31.355 | 8.008  |
| 11/13/2017 14:21 | 0.30 | 53.48  | 249.94 | 377.13 | 919.27  | 22.155 | 6.544  |
| 11/13/2017 14:22 | 0.32 | 67.81  | 318.05 | 437.45 | 1030.57 | 24.265 | 6.193  |
| 11/13/2017 14:23 | 0.30 | 30.75  | 179.76 | 259.86 | 732.48  | 18.000 | 5.313  |
| 11/13/2017 14:24 | 0.37 | 8.07   | 78.95  | 115.12 | 201.07  | 15.815 | 3.749  |
| 11/13/2017 14:25 | 0.40 | 0.61   | 46.31  | 78.18  | 127.76  | 7.443  | 2.465  |
| 11/13/2017 14:26 | 0.55 | -5.63  | 42.25  | 59.74  | 17.74   | 5.916  | 2.380  |
| 11/13/2017 14:27 | 0.70 | -5.27  | 6.74   | 29.74  | 6.28    | 1.995  | 2.299  |
| 11/13/2017 14:28 | 0.98 | -4.82  | 5.64   | 23.80  | 4.89    | 0.424  | 1.276  |
| 11/13/2017 14:29 | 1.17 | -3.83  | 0.24   | 18.82  | 4.67    | 0.683  | 1.154  |
| 11/13/2017 14:30 | 1.30 | -4.59  | 5.02   | 15.96  | 4.15    | 1.315  | 1.223  |
| 11/13/2017 14:31 | 1.38 | -4.90  | -6.31  | 14.06  | 3.32    | 0.613  | 1.753  |
| 11/13/2017 14:32 | 1.58 | -3.76  | -4.44  | 15.52  | 7.83    | 0.358  | 2.219  |
| 11/13/2017 14:33 | 1.67 | -2.88  | -5.70  | 14.26  | 12.45   | 0.521  | 2.942  |
| 11/13/2017 14:34 | 1.92 | -3.32  | -10.90 | 8.94   | 3.16    | 0.055  | 2.986  |
| 11/13/2017 14:35 | 2.20 | -3.73  | -15.26 | 7.81   | 2.12    | 0.053  | 3.542  |
| 11/13/2017 14:36 | 2.53 | -2.96  | -14.53 | 7.13   | 2.17    | 0.050  | 4.531  |
| 11/13/2017 14:37 | 2.68 | -2.31  | -13.64 | 6.57   | 2.08    | 0.031  | 10.399 |
| 11/13/2017 14:38 | 2.62 | -2.88  | 5.29   | 7.34   | 3.17    | 0.495  | 4.934  |
| 11/13/2017 14:39 | 2.48 | -2.14  | -8.42  | 7.07   | 3.75    | 0.190  | 1.491  |
| 11/13/2017 14:40 | 2.30 | -2.97  | -6.57  | 6.58   | 2.67    | 0.258  | 1.126  |
| 11/13/2017 14:41 | 2.47 | -1.38  | -11.73 | 5.33   | 2.10    | 0.043  | 0.973  |
| 11/13/2017 14:42 | 2.87 | -0.17  | -11.54 | 4.95   | 1.98    | 0.037  | 0.935  |
| 11/13/2017 14:43 | 3.42 | 0.57   | -10.96 | 4.70   | 2.00    | 0.025  | 0.938  |
| 11/13/2017 14:44 | 3.78 | 0.34   | -10.80 | 4.53   | 2.08    | 0.036  | 0.971  |
| 11/13/2017 14:45 | 4.03 | -0.48  | -10.29 | 4.29   | 1.98    | 0.028  | 0.956  |
| 11/13/2017 14:46 | 4.17 | 0.02   | -10.30 | 3.94   | 1.97    | 0.028  | 0.942  |
| 11/13/2017 14:47 | 4.23 | 1.50   | -10.18 | 3.85   | 1.71    | 0.037  | 0.940  |
| 11/13/2017 14:48 | 4.30 | 1.02   | -9.14  | 3.73   | 1.87    | 0.018  | 0.932  |
| 11/13/2017 14:49 | 4.38 | 1.12   | -9.07  | 3.64   | 1.92    | 0.030  | 0.899  |
| 11/13/2017 14:50 | 4.47 | 1.98   | -8.51  | 3.56   | 1.92    | 0.086  | 0.920  |

|                  |      |        |        |        |         |        |        |
|------------------|------|--------|--------|--------|---------|--------|--------|
| 11/13/2017 14:51 | 4.58 | 1.23   | -7.64  | 3.56   | 2.18    | 0.939  | 0.975  |
| 11/13/2017 14:52 | 4.70 | 2.64   | -7.57  | 3.43   | 2.01    | 0.119  | 0.940  |
| 11/13/2017 14:53 | 4.83 | 1.50   | -6.63  | 3.30   | 1.72    | 0.034  | 0.916  |
| 11/13/2017 14:54 | 4.95 | 1.72   | -6.48  | 3.26   | 1.70    | 0.020  | 0.910  |
| 11/13/2017 14:55 | 5.07 | 1.36   | -5.83  | 3.17   | 1.96    | 0.032  | 0.937  |
| 11/13/2017 14:56 | 5.18 | 1.43   | -5.11  | 3.12   | 2.00    | 0.022  | 0.945  |
| 11/13/2017 14:57 | 5.33 | 2.87   | -4.50  | 3.07   | 1.84    | 0.027  | 0.951  |
| 11/13/2017 14:58 | 5.33 | 1.33   | -5.65  | 4.81   | 30.94   | 1.227  | 0.987  |
| 11/13/2017 14:59 | 4.97 | 2.98   | -5.39  | 7.91   | 37.66   | 0.302  | 1.006  |
| 11/13/2017 15:00 | 4.87 | 3.74   | -4.13  | 3.79   | 14.59   | 0.207  | 0.941  |
| 11/13/2017 15:01 | 4.83 | 2.03   | -3.76  | 5.28   | 40.35   | 0.483  | 1.022  |
| 11/13/2017 15:02 | 5.35 | 3.30   | -3.01  | 3.05   | 1.96    | 0.014  | 0.972  |
| 11/13/2017 15:03 | 5.57 | 3.81   | -2.88  | 3.05   | 2.35    | 0.038  | 0.960  |
| 11/13/2017 15:04 | 5.90 | 3.10   | -2.50  | 3.18   | 4.23    | 0.052  | 0.949  |
| 11/13/2017 15:05 | 5.77 | 2.73   | -2.70  | 5.01   | 18.89   | 0.074  | 0.954  |
| 11/13/2017 15:06 | 5.80 | 3.47   | -2.15  | 3.24   | 2.19    | 0.039  | 0.950  |
| 11/13/2017 15:07 | 5.63 | 2.59   | -2.74  | 3.90   | 2.36    | 0.049  | 0.991  |
| 11/13/2017 15:08 | 5.62 | 2.36   | -2.73  | 3.92   | 2.42    | 0.057  | 1.132  |
| 11/13/2017 15:09 | 5.37 | 2.63   | -2.17  | 3.92   | 2.22    | 0.055  | 1.436  |
| 11/13/2017 15:10 | 5.30 | 4.60   | -1.38  | 3.26   | 2.03    | 0.042  | 2.016  |
| 11/13/2017 15:11 | 5.40 | 2.98   | 0.31   | 2.95   | 1.85    | 0.040  | 2.509  |
| 11/13/2017 15:12 | 5.67 | 3.37   | -0.96  | 2.75   | 1.99    | 0.031  | 2.277  |
| 11/13/2017 15:13 | 5.88 | 5.17   | 0.36   | 2.55   | 2.13    | 0.045  | 1.863  |
| 11/13/2017 15:14 | 6.13 | 5.13   | -0.42  | 2.51   | 2.29    | 0.034  | 1.912  |
| 11/13/2017 15:15 | 6.32 | 4.97   | 0.64   | 2.44   | 2.01    | 0.020  | 2.826  |
| 11/13/2017 15:16 | 6.55 | 6.15   | 4.39   | 2.43   | 1.94    | 0.026  | 4.992  |
| 11/13/2017 15:17 | 6.63 | 4.96   | 2.86   | 2.36   | 1.92    | 0.039  | 5.334  |
| 11/13/2017 15:18 | 6.75 | 7.03   | 0.50   | 2.47   | 3.51    | 0.725  | 5.031  |
| 11/13/2017 15:19 | 6.80 | 5.00   | 1.93   | 2.39   | 2.08    | 0.174  | 3.424  |
| 11/13/2017 15:20 | 6.80 | 4.96   | 0.95   | 2.29   | 2.07    | 0.044  | 4.266  |
| 11/13/2017 15:21 | 6.82 | 6.38   | 2.06   | 2.31   | 2.10    | 0.031  | 8.688  |
| 11/13/2017 15:22 | 6.90 | 5.83   | 2.12   | 2.32   | 1.93    | 0.036  | 8.604  |
| 11/13/2017 15:23 | 6.93 | 4.60   | 2.68   | 2.27   | 1.83    | 0.034  | 4.750  |
| 11/13/2017 15:24 | 7.02 | 5.30   | 4.02   | 2.21   | 1.86    | 0.026  | 2.779  |
| 11/13/2017 15:25 | 7.10 | 5.20   | 3.19   | 2.16   | 2.24    | 0.073  | 2.150  |
| 11/13/2017 15:26 | 7.20 | 5.18   | 3.50   | 2.32   | 2.47    | 0.200  | 1.374  |
| 11/13/2017 15:27 | 6.60 | 27.89  | 104.13 | 154.37 | 171.94  | 3.818  | 1.559  |
| 11/13/2017 15:28 | 4.55 | 42.81  | 224.95 | 291.51 | 577.12  | 14.152 | 3.394  |
| 11/13/2017 15:29 | 2.35 | 81.45  | 379.06 | 585.37 | 1236.72 | 23.370 | 5.352  |
| 11/13/2017 15:30 | 0.73 | 81.75  | 317.38 | 621.58 | 1277.85 | 25.653 | 6.062  |
| 11/13/2017 15:31 | 0.45 | 194.58 | 939.94 | 914.85 | 1699.72 | 51.213 | 11.700 |
| 11/13/2017 15:32 | 0.40 | 97.71  | 488.88 | 583.68 | 1141.05 | 39.794 | 10.112 |
| 11/13/2017 15:33 | 0.35 | 68.36  | 348.40 | 490.53 | 1013.72 | 26.158 | 6.527  |
| 11/13/2017 15:34 | 0.30 | 37.88  | 236.96 | 387.49 | 847.58  | 19.067 | 5.091  |
| 11/13/2017 15:35 | 0.33 | 31.69  | 201.26 | 349.85 | 694.57  | 15.261 | 3.893  |
| 11/13/2017 15:36 | 0.38 | 56.48  | 260.86 | 416.33 | 788.92  | 19.698 | 4.255  |
| 11/13/2017 15:37 | 0.30 | 114.72 | 642.56 | 380.88 | 690.65  | 29.725 | 7.106  |

|                  |        |        |         |        |         |        |        |
|------------------|--------|--------|---------|--------|---------|--------|--------|
| 11/13/2017 15:38 | 0.38   | 52.21  | 347.94  | 224.71 | 364.69  | 22.014 | 7.362  |
| 11/13/2017 15:39 | 0.50   | 19.15  | 150.68  | 162.69 | 308.21  | 9.469  | 3.701  |
| 11/13/2017 15:40 | 0.60   | 26.67  | 159.68  | 201.93 | 351.50  | 9.589  | 3.281  |
| 11/13/2017 15:41 | 0.60   | 19.56  | 129.88  | 157.45 | 320.00  | 9.282  | 3.386  |
| 11/13/2017 15:42 | 0.60   | 17.40  | 107.40  | 207.05 | 316.11  | 6.289  | 2.470  |
| 11/13/2017 15:43 | 0.52   | 43.65  | 199.47  | 300.47 | 477.22  | 12.081 | 3.589  |
| 11/13/2017 15:44 | 0.55   | 51.45  | 284.22  | 227.08 | 315.59  | 14.117 | 4.624  |
| 11/13/2017 15:45 | 0.47   | 31.95  | 227.26  | 208.29 | 326.08  | 11.576 | 4.054  |
| 11/13/2017 15:46 | 0.50   | 59.16  | 314.75  | 321.98 | 400.04  | 14.272 | 4.227  |
| 11/13/2017 15:47 | 0.60   | 30.11  | 173.30  | 133.28 | 206.25  | 8.708  | 3.707  |
| 11/13/2017 15:48 | 0.78   | 35.59  | 240.90  | 120.29 | 138.03  | 11.364 | 4.031  |
| 11/13/2017 15:49 | 0.87   | 11.00  | 88.45   | 140.60 | 212.63  | 5.513  | 2.603  |
| 11/13/2017 15:50 | 0.83   | 84.41  | 342.97  | 247.10 | 343.07  | 12.350 | 3.791  |
| 11/13/2017 15:51 | 0.70   | 86.25  | 523.58  | 221.22 | 294.77  | 24.558 | 7.836  |
| 11/13/2017 15:52 | 0.67   | 105.39 | 565.16  | 370.61 | 558.88  | 28.113 | 7.675  |
| 11/13/2017 15:53 | 0.57   | 55.73  | 323.53  | 385.83 | 617.44  | 18.134 | 5.727  |
| 11/13/2017 15:54 | 0.45   | 75.85  | 357.53  | 561.35 | 879.67  | 20.955 | 5.649  |
| 11/13/2017 15:55 | 0.30   | 131.49 | 570.18  | 889.76 | 1167.92 | 31.239 | 7.870  |
| 11/13/2017 15:56 | 0.37   | 369.38 | 1607.54 | 967.09 | 1481.53 | 63.011 | 15.877 |
| 11/13/2017 15:57 | 0.40   | 169.38 | 970.17  | 281.15 | 346.33  | 57.295 | 18.691 |
| 11/13/2017 15:58 | 0.48   | 22.53  | 279.62  | 153.41 | 199.78  | 15.662 | 6.499  |
| 11/13/2017 15:59 | 0.55   | 35.93  | 304.62  | 289.86 | 379.62  | 10.825 | 3.837  |
| 11/13/2017 16:00 | 0.60   | 75.63  | 360.16  | 284.03 | 344.08  | 11.990 | 4.623  |
| 11/13/2017 16:01 | 0.60   | 276.50 | 1083.21 | 383.77 | 332.88  | 34.493 | 11.144 |
| 11/13/2017 16:02 | 0.55   | 159.85 | 1085.18 | 263.98 | 280.39  | 56.568 | 16.222 |
| 11/13/2017 16:03 | 0.50   | 212.67 | 912.83  | 271.42 | 283.31  | 41.099 | 11.118 |
| 11/13/2017 16:04 | 0.50   | 77.35  | 528.38  | 126.32 | 121.38  | 29.023 | 10.457 |
| 11/13/2017 16:05 | 0.58   | 38.14  | 297.39  | 75.68  | 47.98   | 11.372 | 5.877  |
| 11/13/2017 16:06 | 0.72   | 15.80  | 169.92  | 49.25  | 14.64   | 3.317  | 3.643  |
| 11/13/2017 16:07 | 0.93   | 6.33   | 108.99  | 38.77  | 8.08    | 1.380  | 2.631  |
| 11/13/2017 16:08 | 1.22   | 2.13   | 67.23   | 30.62  | 5.03    | 0.721  | 2.091  |
| 11/13/2017 16:09 | 1.48   | -0.57  | 45.24   | 30.14  | 4.26    | 0.541  | 1.801  |
| 11/13/2017 16:10 | 1.62   | 1.32   | 33.58   | 24.60  | 4.13    | 0.454  | 1.775  |
| 11/13/2017 16:11 | 0.58   | 42.58  | 198.34  | 58.66  | 25.55   | 5.901  | 3.268  |
| 11/13/2017 16:12 | -7.58  | 24.75  | 114.01  | 49.34  | 42.86   | 7.105  | 4.575  |
| 11/13/2017 16:13 | -16.98 | 12.13  | 60.94   | 40.10  | 58.23   | 4.220  | 3.003  |
| 11/13/2017 16:14 | -23.57 | 13.18  | 53.39   | 35.41  | 36.80   | 2.278  | 2.387  |
| 11/13/2017 16:15 | -23.80 | 9.98   | 32.56   | 33.33  | 33.65   | 1.924  | 2.205  |
| 11/13/2017 16:16 | -23.80 | 6.12   | 25.81   | 34.74  | 45.69   | 1.432  | 1.971  |
| 11/13/2017 16:17 | -23.80 | 6.20   | 22.40   | 36.40  | 46.87   | 1.707  | 1.920  |
| 11/13/2017 16:18 | -23.80 | 5.69   | 23.44   | 32.46  | 47.77   | 1.739  | 1.845  |
| 11/13/2017 16:19 | -23.80 | 6.65   | 18.20   | 32.01  | 42.23   | 1.587  | 1.789  |
| 11/13/2017 16:20 | -23.80 | 5.81   | 17.50   | 34.02  | 48.17   | 1.588  | 1.757  |
| 11/13/2017 16:21 | -23.80 | 6.00   | 18.16   | 32.57  | 45.35   | 1.647  | 1.802  |
| 11/13/2017 16:22 | -23.80 | 4.60   | 9.28    | 26.55  | 30.74   | 1.166  | 1.675  |
| 11/13/2017 16:23 | -23.80 | 6.29   | 14.65   | 28.57  | 35.80   | 1.393  | 1.727  |
| 11/13/2017 16:24 |        | 3.71   | 2.12    | 26.22  | 29.98   | 1.240  | 1.588  |



|                  |      |       |        |       |       |        |       |
|------------------|------|-------|--------|-------|-------|--------|-------|
| 11/13/2017 16:25 | 0.40 | 3.78  | 4.75   | 28.00 | 41.98 | 1.612  | 1.586 |
| 11/13/2017 16:26 | 0.50 | 5.54  | 8.61   | 36.51 | 43.13 | 1.186  | 1.540 |
| 11/13/2017 16:27 | 0.50 | 14.48 | 53.78  | 35.90 | 35.08 | 2.303  | 1.814 |
| 11/13/2017 16:28 | 0.50 | 28.59 | 114.87 | 36.91 | 19.03 | 6.901  | 2.843 |
| 11/13/2017 16:29 | 0.50 | 10.13 | 38.11  | 21.76 | 12.10 | 3.925  | 2.322 |
| 11/13/2017 16:30 | 0.50 | 2.89  | 12.94  | 14.97 | 9.38  | 1.645  | 1.593 |
| 11/13/2017 16:31 | 0.50 | 4.75  | 11.35  | 20.24 | 20.76 | 2.569  | 1.546 |
| 11/13/2017 16:32 | 0.58 | 2.30  | 7.40   | 15.53 | 10.53 | 1.172  | 1.480 |
| 11/13/2017 16:33 | 0.60 | 1.10  | -1.42  | 10.83 | 6.21  | 1.009  | 1.325 |
| 11/13/2017 16:34 | 0.60 | 8.63  | 29.10  | 22.45 | 15.45 | 1.465  | 1.566 |
| 11/13/2017 16:35 | 0.63 | 4.71  | 13.64  | 11.87 | 10.47 | 2.325  | 1.540 |
| 11/13/2017 16:36 | 0.60 | 3.75  | 11.27  | 10.98 | 8.09  | 2.230  | 1.447 |
| 11/13/2017 16:37 | 0.60 | 1.66  | 31.93  | 11.03 | 9.32  | 1.196  | 2.606 |
| 11/13/2017 16:38 | 0.25 | 10.88 | 49.58  | 26.28 | 32.18 | 2.311  | 2.068 |
| 11/13/2017 16:39 | 0.38 | 11.13 | 48.36  | 21.29 | 30.82 | 1.768  | 1.902 |
| 11/13/2017 16:40 | 0.57 | 8.58  | 46.18  | 23.04 | 28.18 | 1.593  | 1.861 |
| 11/13/2017 16:41 | 0.60 | 9.92  | 44.02  | 23.17 | 27.02 | 1.296  | 1.792 |
| 11/13/2017 16:42 | 0.60 | 7.68  | 42.57  | 23.23 | 30.93 | 1.063  | 1.747 |
| 11/13/2017 16:43 | 0.57 | 3.77  | 36.07  | 32.33 | 23.45 | 0.441  | 1.592 |
| 11/13/2017 16:44 | 0.60 | 5.18  | 29.96  | 13.26 | 21.14 | 0.195  | 1.471 |
| 11/13/2017 16:45 | 0.60 | 4.12  | 24.37  | 12.61 | 12.27 | 0.125  | 1.371 |
| 11/13/2017 16:46 | 0.60 | 5.59  | 25.66  | 14.26 | 11.12 | 0.142  | 1.359 |
| 11/13/2017 16:47 | 0.60 | 3.96  | 26.69  | 14.58 | 14.85 | 0.129  | 1.360 |
| 11/13/2017 16:48 | 0.60 | 4.40  | 27.17  | 13.03 | 12.15 | 0.101  | 1.377 |
| 11/13/2017 16:49 | 0.60 | 4.78  | 27.10  | 13.98 | 13.84 | 0.092  | 1.384 |
| 11/13/2017 16:50 | 0.60 | 4.53  | 27.09  | 12.12 | 10.74 | 0.086  | 1.386 |
| 11/13/2017 16:51 | 0.60 | 4.57  | 26.63  | 17.02 | 16.75 | 0.063  | 1.388 |
| 11/13/2017 16:52 | 0.60 | 5.49  | 26.33  | 9.57  | 9.47  | 0.127  | 1.385 |
| 11/13/2017 16:53 | 0.60 | 3.33  | 24.83  | 6.04  | 4.39  | 0.094  | 1.694 |
| 11/13/2017 16:54 | 0.63 | 4.27  | 18.34  | 4.83  | 3.12  | 0.051  | 1.572 |
| 11/13/2017 16:55 | 0.70 | 2.13  | 6.39   | 4.66  | 3.66  | 0.024  | 1.938 |
| 11/13/2017 16:56 | 0.68 | 2.27  | 14.49  | 5.16  | 4.33  | 0.018  | 1.887 |
| 11/13/2017 16:57 | 0.60 | 1.65  | 18.49  | 8.21  | 9.70  | 0.045  | 1.397 |
| 11/13/2017 16:58 | 0.60 | 2.57  | 16.99  | 6.15  | 6.72  | 0.031  | 1.532 |
| 11/13/2017 16:59 | 0.60 | 2.08  | 13.53  | 4.77  | 3.89  | 0.011  | 1.713 |
| 11/13/2017 17:00 | 0.60 | 2.36  | 16.17  | 5.88  | 6.39  | 0.037  | 1.373 |
| 11/13/2017 17:01 | 0.55 | 2.83  | 16.08  | 7.10  | 8.68  | 0.041  | 1.315 |
| 11/13/2017 17:02 | 0.52 | 3.18  | 8.25   | 9.06  | 40.09 | 0.168  | 1.609 |
| 11/13/2017 17:03 | 0.60 | 0.98  | 0.58   | 5.07  | 7.14  | -0.002 | 2.245 |
| 11/13/2017 17:04 | 0.60 | 1.07  | 2.79   | 13.02 | 6.91  | -0.010 | 3.027 |
| 11/13/2017 17:05 | 0.60 | 2.03  | 1.24   | 4.24  | 8.46  | -0.007 | 2.451 |
| 11/13/2017 17:06 | 0.67 | 1.55  | 0.39   | 4.03  | 4.12  | -0.020 | 1.810 |
| 11/13/2017 17:07 | 0.70 | 1.28  | 3.62   | 5.98  | 9.58  | 0.018  | 2.354 |
| 11/13/2017 17:08 | 1.07 | 4.18  | 2.86   | 3.59  | 2.25  | -0.003 | 2.977 |
| 11/13/2017 17:09 | 1.83 | 2.30  | 2.67   | 3.35  | 2.17  | -0.001 | 4.174 |
| 11/13/2017 17:10 | 2.68 | 1.39  | 3.98   | 3.32  | 2.68  | 0.014  | 6.314 |
| 11/13/2017 17:11 | 3.15 | 2.14  | 3.12   | 3.26  | 2.49  | -0.009 | 5.368 |

|                  |      |       |       |       |       |        |       |
|------------------|------|-------|-------|-------|-------|--------|-------|
| 11/13/2017 17:12 | 3.10 | 1.71  | 4.38  | 2.79  | 2.36  | 0.008  | 1.674 |
| 11/13/2017 17:13 | 2.87 | 2.63  | 6.79  | 2.81  | 2.50  | -0.002 | 1.546 |
| 11/13/2017 17:14 | 2.67 | 2.88  | 5.68  | 2.72  | 2.52  | -0.003 | 2.632 |
| 11/13/2017 17:15 | 2.60 | 3.55  | 6.07  | 2.64  | 2.24  | -0.005 | 7.387 |
| 11/13/2017 17:16 | 2.62 | 1.65  | 7.21  | 10.52 | 12.59 | -0.011 | 4.497 |
| 11/13/2017 17:17 | 2.73 | 2.99  | 4.17  | 2.89  | 2.80  | -0.003 | 1.603 |
| 11/13/2017 17:18 | 3.07 | 1.22  | 2.67  | 3.24  | 2.43  | -0.006 | 4.068 |
| 11/13/2017 17:19 | 3.57 | 3.88  | 4.52  | 2.89  | 1.87  | -0.019 | 5.280 |
| 11/13/2017 17:20 | 3.77 | 1.22  | 6.34  | 3.12  | 3.14  | -0.002 | 1.253 |
| 11/13/2017 17:21 | 3.28 | 1.52  | 4.65  | 5.02  | 5.87  | 0.006  | 2.718 |
| 11/13/2017 17:22 | 3.07 | 2.53  | 2.20  | 3.04  | 2.76  | 0.021  | 5.797 |
| 11/13/2017 17:23 | 2.85 | 1.53  | 4.98  | 3.18  | 3.05  | -0.002 | 1.923 |
| 11/13/2017 17:24 | 2.70 | 2.39  | 8.25  | 2.70  | 4.10  | 0.002  | 1.717 |
| 11/13/2017 17:25 | 2.18 | 1.23  | 6.10  | 12.11 | 5.03  | 0.122  | 1.207 |
| 11/13/2017 17:26 | 1.65 | 0.26  | 7.32  | 32.27 | 23.79 | 0.095  | 1.441 |
| 11/13/2017 17:27 | 1.35 | -0.64 | 7.79  | 81.77 | 57.80 | 0.006  | 2.330 |
| 11/13/2017 17:28 | 1.13 | 1.88  | 9.92  | 12.75 | 22.89 | 0.016  | 2.070 |
| 11/13/2017 17:29 | 1.23 | 2.45  | 9.77  | 3.53  | 3.20  | 0.009  | 1.567 |
| 11/13/2017 17:30 | 1.48 | 1.80  | 8.25  | 43.92 | 31.10 | 0.010  | 1.195 |
| 11/13/2017 17:31 | 1.65 | 2.53  | 9.74  | 8.10  | 13.94 | 0.007  | 1.162 |
| 11/13/2017 17:32 | 1.63 | 1.28  | 9.68  | 14.77 | 9.64  | 0.386  | 1.134 |
| 11/13/2017 17:33 | 1.67 | 0.93  | 9.71  | 3.04  | 5.45  | 0.049  | 1.138 |
| 11/13/2017 17:34 | 1.75 | 0.99  | 11.12 | 5.23  | 4.82  | 0.008  | 1.143 |
| 11/13/2017 17:35 | 1.58 | 1.10  | 8.91  | 3.68  | 5.76  | 0.054  | 1.160 |
| 11/13/2017 17:36 | 1.35 | -0.44 | -0.10 | 2.10  | 2.84  | 0.008  | 1.130 |
| 11/13/2017 17:37 | 1.10 | 0.06  | -1.33 | 1.77  | 3.13  | -0.008 | 1.086 |
| 11/13/2017 17:38 | 1.02 | 0.31  | -1.65 | 2.50  | 4.01  | -0.009 | 1.028 |
| 11/13/2017 17:39 | 1.02 | 1.19  | -2.98 | 2.98  | 4.25  | 0.226  | 1.018 |
| 11/13/2017 17:40 | 1.13 | -0.19 | 0.20  | 4.60  | 5.05  | 0.126  | 1.014 |
| 11/13/2017 17:41 | 1.27 | 1.91  | 2.04  | 3.22  | 6.23  | 0.019  | 0.982 |
| 11/13/2017 17:42 | 1.25 | 0.64  | 2.62  | 1.25  | 2.63  | 0.009  | 0.939 |
| 11/13/2017 17:43 | 1.80 | 2.06  | 3.12  | 4.22  | 3.54  | -0.019 | 0.884 |
| 11/13/2017 17:44 | 2.22 | 0.93  | -0.37 | 2.69  | 3.65  | -0.032 | 0.895 |
| 11/13/2017 17:45 | 2.22 | 1.17  | 1.20  | 1.59  | 2.97  | -0.023 | 0.902 |
| 11/13/2017 17:46 | 1.72 | -0.41 | 1.45  | 1.04  | 3.00  | -0.027 | 0.897 |
| 11/13/2017 17:47 | 1.18 | 0.39  | 1.80  | 3.25  | 4.89  | -0.017 | 0.925 |
| 11/13/2017 17:48 | 1.13 | 0.83  | 3.89  | 2.61  | 4.15  | 0.346  | 0.945 |
| 11/13/2017 17:49 | 1.17 | 1.67  | 4.04  | 1.61  | 3.82  | 0.040  | 0.941 |
| 11/13/2017 17:50 | 1.20 | 1.59  | 4.36  | 2.75  | 4.89  | 0.045  | 0.960 |
| 11/13/2017 17:51 | 1.27 | 0.92  | 5.53  | 2.47  | 5.03  | 0.042  | 0.996 |
| 11/13/2017 17:52 | 1.33 | 1.49  | 6.28  | 2.07  | 3.85  | 0.022  | 0.997 |
| 11/13/2017 17:53 | 1.38 | 0.83  | 6.95  | 8.29  | 9.15  | 0.026  | 0.991 |
| 11/13/2017 17:54 | 1.55 | 2.43  | 7.22  | 5.52  | 6.74  | 0.018  | 0.994 |
| 11/13/2017 17:55 | 1.90 | 1.82  | 7.09  | 3.01  | 3.38  | 0.003  | 0.988 |
| 11/13/2017 17:56 | 2.18 | -2.05 | 7.14  | 1.44  | 2.24  | 0.086  | 0.952 |
| 11/13/2017 17:57 | 2.22 | -1.04 | 7.25  | 3.96  | 4.73  | 0.128  | 0.940 |
| 11/13/2017 17:58 | 2.18 | 0.51  | 7.51  | 2.44  | 3.52  | 0.090  | 0.910 |

|                  |      |       |       |       |        |        |       |
|------------------|------|-------|-------|-------|--------|--------|-------|
| 11/13/2017 17:59 | 2.27 | 0.47  | 7.36  | 1.45  | 2.42   | -0.003 | 0.864 |
| 11/13/2017 18:00 | 2.43 | -1.18 | 6.88  | 2.03  | 3.41   | 0.011  | 0.846 |
| 11/13/2017 18:01 | 2.22 | -1.05 | 6.59  | 4.01  | 5.67   | 0.012  | 0.813 |
| 11/13/2017 18:02 | 1.83 | -1.96 | 7.50  | 6.99  | 7.97   | 0.032  | 0.785 |
| 11/13/2017 18:03 | 1.60 | -0.68 | 7.36  | 6.29  | 5.89   | 0.018  | 0.767 |
| 11/13/2017 18:04 | 1.77 | 2.68  | 6.99  | 5.58  | 4.85   | -0.003 | 0.779 |
| 11/13/2017 18:05 | 1.75 | 0.81  | 3.07  | 2.49  | 4.22   | -0.003 | 0.725 |
| 11/13/2017 18:06 | 1.35 | -0.28 | 2.95  | 2.68  | 4.78   | 0.004  | 0.701 |
| 11/13/2017 18:07 | 1.02 | -1.35 | 6.32  | 26.17 | 10.26  | 0.025  | 0.683 |
| 11/13/2017 18:08 | 0.82 | -1.36 | 4.69  | 53.38 | 135.31 | 0.152  | 0.668 |
| 11/13/2017 18:09 | 0.73 | -1.38 | 2.37  | 25.43 | 58.81  | 0.054  | 0.665 |
| 11/13/2017 18:10 | 0.35 | -1.44 | 2.17  | 21.67 | 51.85  | 0.041  | 0.661 |
| 11/13/2017 18:11 | 0.18 | -2.06 | 2.12  | 20.36 | 46.18  | 0.053  | 0.715 |
| 11/13/2017 18:12 | 0.25 | -0.57 | 1.55  | 17.37 | 27.62  | 0.063  | 0.702 |
| 11/13/2017 18:13 | 0.58 | -0.88 | 2.59  | 9.29  | 30.12  | 0.046  | 0.674 |
| 11/13/2017 18:14 | 0.53 | -1.29 | 3.49  | 8.31  | 37.95  | 0.048  | 0.682 |
| 11/13/2017 18:15 | 0.40 | -0.69 | 3.85  | 7.15  | 34.34  | 0.054  | 0.692 |
| 11/13/2017 18:16 | 0.53 | 0.73  | 3.97  | 6.06  | 10.23  | 0.039  | 0.699 |
| 11/13/2017 18:17 | 1.17 | -0.68 | 3.82  | 5.08  | 8.66   | 0.036  | 0.712 |
| 11/13/2017 18:18 | 1.28 | -0.93 | 5.10  | 4.91  | 24.22  | 0.050  | 0.803 |
| 11/13/2017 18:19 | 0.85 | -1.28 | 5.70  | 4.48  | 21.57  | 0.031  | 0.770 |
| 11/13/2017 18:20 | 0.20 | -2.13 | 5.85  | 4.16  | 19.62  | 0.035  | 0.802 |
| 11/13/2017 18:21 | 0.18 | -1.01 | 6.42  | 3.96  | 15.51  | 0.043  | 0.791 |
| 11/13/2017 18:22 | 0.20 | -2.44 | 6.58  | 3.96  | 15.75  | 0.031  | 0.795 |
| 11/13/2017 18:23 | 0.27 | -2.53 | 7.46  | 3.83  | 15.53  | 0.046  | 0.774 |
| 11/13/2017 18:24 | 0.22 | 0.22  | 7.82  | 3.58  | 16.08  | 0.042  | 0.805 |
| 11/13/2017 18:25 | 0.23 | -0.74 | 8.15  | 3.33  | 15.46  | 0.033  | 0.829 |
| 11/13/2017 18:26 | 0.20 | -0.95 | 8.93  | 3.06  | 14.84  | 0.048  | 0.867 |
| 11/13/2017 18:27 | 0.23 | -2.20 | 9.46  | 2.92  | 14.54  | 0.034  | 0.842 |
| 11/13/2017 18:28 | 0.30 | 0.90  | 9.63  | 2.79  | 12.36  | 0.046  | 0.829 |
| 11/13/2017 18:29 | 0.30 | -0.22 | 9.51  | 2.80  | 12.92  | 0.065  | 0.812 |
| 11/13/2017 18:30 | 0.32 | 0.38  | 9.88  | 2.71  | 12.54  | 0.053  | 0.862 |
| 11/13/2017 18:31 | 0.30 | -0.72 | 9.94  | 2.61  | 11.88  | 0.057  | 0.841 |
| 11/13/2017 18:32 | 0.30 | -0.24 | 10.28 | 2.55  | 12.07  | 0.067  | 0.826 |
| 11/13/2017 18:33 | 0.32 | -1.98 | 10.96 | 2.47  | 12.20  | 0.053  | 0.848 |
| 11/13/2017 18:34 | 0.33 | -1.62 | 11.10 | 2.37  | 11.46  | 0.066  | 0.847 |
| 11/13/2017 18:35 | 0.40 | -0.31 | 11.44 | 2.37  | 10.68  | 0.069  | 0.824 |
| 11/13/2017 18:36 | 0.40 | -1.48 | 11.40 | 2.38  | 11.87  | 0.054  | 0.880 |
| 11/13/2017 18:37 | 0.40 | -0.07 | 11.85 | 2.36  | 12.02  | 0.062  | 0.903 |
| 11/13/2017 18:38 | 0.33 | -1.08 | 11.94 | 2.38  | 11.74  | 0.047  | 0.965 |
| 11/13/2017 18:39 | 0.35 | -0.07 | 12.21 | 2.41  | 10.09  | 0.056  | 0.941 |
| 11/13/2017 18:40 | 0.42 | -0.05 | 12.19 | 2.43  | 10.77  | 0.052  | 0.919 |
| 11/13/2017 18:41 | 0.40 | -1.08 | 11.96 | 2.47  | 10.75  | 0.040  | 0.938 |
| 11/13/2017 18:42 | 0.40 | 0.08  | 12.51 | 2.44  | 10.27  | 0.053  | 1.001 |
| 11/13/2017 18:43 | 0.40 | -0.35 | 12.59 | 2.44  | 10.56  | 0.044  | 1.013 |
| 11/13/2017 18:44 | 0.40 | -2.58 | 12.33 | 2.44  | 10.23  | 0.037  | 0.997 |
| 11/13/2017 18:45 | 0.40 | 0.11  | 12.35 | 2.45  | 9.22   | 0.045  | 0.942 |

|                  |      |       |       |      |      |       |       |
|------------------|------|-------|-------|------|------|-------|-------|
| 11/13/2017 18:46 | 0.40 | -0.63 | 12.95 | 2.51 | 9.61 | 0.050 | 0.978 |
| 11/13/2017 18:47 | 0.47 | -0.93 | 12.96 | 2.54 | 8.42 | 0.032 | 0.958 |
| 11/13/2017 18:48 | 0.75 | 0.43  | 12.83 | 2.60 | 5.17 | 0.040 | 0.875 |
| 11/13/2017 18:49 | 0.98 | -1.03 | 12.84 | 2.63 | 6.48 | 0.037 | 0.895 |
| 11/13/2017 18:50 | 0.98 | 0.43  | 12.82 | 2.72 | 8.66 | 0.031 | 0.968 |
| 11/13/2017 18:51 | 0.72 | -1.26 | 12.80 | 2.77 | 8.64 | 0.039 | 0.982 |
| 11/13/2017 18:52 | 0.47 | -0.23 | 12.97 | 2.78 | 8.70 | 0.026 | 0.985 |
| 11/13/2017 18:53 | 0.40 | -1.10 | 13.10 | 2.78 | 8.36 | 0.028 | 1.007 |
| 11/13/2017 18:54 | 0.47 | 0.57  | 12.81 | 2.81 | 6.88 | 0.034 | 0.952 |
| 11/13/2017 18:55 | 0.50 | -0.33 | 12.81 | 2.83 | 7.98 | 0.024 | 0.933 |
| 11/13/2017 18:56 | 0.80 | 2.28  | 12.72 | 2.82 | 4.63 | 0.035 | 0.922 |
| 11/13/2017 18:57 | 1.35 | 0.90  | 13.28 | 2.82 | 3.13 | 0.031 | 0.896 |
| 11/13/2017 18:58 | 1.60 | 0.13  | 13.29 | 2.87 | 5.28 | 0.022 | 0.914 |
| 11/13/2017 18:59 | 1.33 | -0.06 | 13.06 | 2.95 | 7.57 | 0.037 | 1.006 |
| 11/13/2017 19:00 | 0.73 | -0.20 | 13.73 | 2.88 | 7.29 | 0.022 | 1.002 |
| 11/13/2017 19:01 | 0.40 | -0.78 | 13.70 | 2.83 | 7.84 | 0.030 | 1.031 |
| 11/13/2017 19:02 | 0.40 | -0.40 | 13.46 | 2.86 | 7.69 | 0.031 | 1.078 |
| 11/13/2017 19:03 | 0.40 | -0.68 | 13.19 | 2.95 | 7.55 | 0.020 | 1.129 |
| 11/13/2017 19:04 | 0.40 | -0.56 | 13.29 | 3.03 | 7.23 | 0.022 | 1.133 |
| 11/13/2017 19:05 | 0.40 | -0.05 | 13.01 | 3.02 | 6.91 | 0.020 | 1.107 |
| 11/13/2017 19:06 | 0.40 | -0.23 | 12.75 | 2.97 | 6.42 | 0.020 | 1.032 |
| 11/13/2017 19:07 | 0.40 | -1.23 | 12.98 | 2.96 | 6.99 | 0.030 | 0.973 |
| 11/13/2017 19:08 | 0.43 | -0.61 | 13.35 | 2.98 | 6.80 | 0.012 | 0.956 |
| 11/13/2017 19:09 | 0.50 | -0.80 | 13.79 | 2.99 | 7.34 | 0.026 | 0.984 |
| 11/13/2017 19:10 | 0.47 | 0.83  | 14.18 | 2.91 | 7.81 | 0.020 | 1.062 |
| 11/13/2017 19:11 | 0.47 | -0.56 | 13.94 | 2.89 | 7.58 | 0.023 | 1.085 |
| 11/13/2017 19:12 | 0.58 | 1.55  | 13.99 | 2.89 | 5.72 | 0.031 | 1.048 |
| 11/13/2017 19:13 | 0.67 | -0.58 | 13.73 | 2.88 | 7.43 | 0.016 | 1.053 |
| 11/13/2017 19:14 | 0.70 | -0.84 | 14.06 | 2.63 | 7.03 | 0.021 | 1.026 |
| 11/13/2017 19:15 | 0.48 | -1.50 | 14.31 | 2.51 | 7.14 | 0.028 | 1.071 |
| 11/13/2017 19:16 | 0.43 | 0.31  | 13.96 | 2.52 | 7.54 | 0.021 | 1.031 |
| 11/13/2017 19:17 | 0.40 | -0.12 | 14.28 | 2.50 | 7.68 | 0.030 | 1.030 |
| 11/13/2017 19:18 | 0.40 | -0.55 | 13.82 | 2.51 | 7.52 | 0.027 | 1.117 |
| 11/13/2017 19:19 | 0.42 | 0.45  | 13.48 | 2.59 | 6.38 | 0.014 | 1.132 |
| 11/13/2017 19:20 | 0.43 | -0.23 | 13.59 | 2.63 | 6.88 | 0.026 | 1.069 |
| 11/13/2017 19:21 | 0.45 | 1.19  | 13.56 | 2.63 | 6.14 | 0.017 | 1.011 |
| 11/13/2017 19:22 | 0.58 | 1.28  | 13.55 | 2.55 | 5.64 | 0.026 | 0.995 |
| 11/13/2017 19:23 | 0.65 | 0.05  | 13.86 | 2.50 | 6.51 | 0.033 | 1.002 |
| 11/13/2017 19:24 | 0.67 | 1.94  | 13.92 | 2.49 | 6.44 | 0.012 | 1.043 |
| 11/13/2017 19:25 | 0.83 | 0.38  | 13.38 | 2.48 | 4.67 | 0.028 | 0.992 |
| 11/13/2017 19:26 | 0.90 | -0.58 | 13.67 | 2.49 | 7.18 | 0.024 | 1.015 |
| 11/13/2017 19:27 | 0.83 | -1.61 | 13.45 | 2.50 | 7.13 | 0.023 | 1.090 |
| 11/13/2017 19:28 | 0.48 | 0.41  | 13.38 | 2.53 | 7.03 | 0.026 | 1.132 |
| 11/13/2017 19:29 | 0.40 | 1.17  | 13.24 | 2.59 | 6.55 | 0.011 | 1.193 |
| 11/13/2017 19:30 | 0.33 | 0.83  | 12.84 | 2.64 | 6.39 | 0.018 | 1.217 |
| 11/13/2017 19:31 | 0.45 | 0.22  | 11.45 | 2.59 | 5.34 | 0.019 | 1.192 |
| 11/13/2017 19:32 | 0.92 | 0.88  | 9.81  | 2.29 | 3.10 | 0.016 | 1.047 |

|                  |      |       |       |      |       |       |       |
|------------------|------|-------|-------|------|-------|-------|-------|
| 11/13/2017 19:33 | 1.28 | 1.03  | 11.55 | 2.43 | 3.76  | 0.025 | 1.003 |
| 11/13/2017 19:34 | 1.78 | 1.04  | 10.53 | 2.28 | 3.05  | 0.018 | 0.979 |
| 11/13/2017 19:35 | 1.82 | 0.83  | 12.01 | 2.31 | 3.71  | 0.025 | 0.979 |
| 11/13/2017 19:36 | 1.78 | 1.34  | 11.53 | 2.38 | 3.33  | 0.022 | 0.965 |
| 11/13/2017 19:37 | 1.75 | 0.73  | 10.48 | 2.32 | 2.45  | 0.015 | 0.948 |
| 11/13/2017 19:38 | 1.62 | -0.13 | 11.55 | 2.36 | 4.20  | 0.025 | 0.985 |
| 11/13/2017 19:39 | 1.35 | -1.09 | 12.26 | 2.41 | 6.10  | 0.016 | 1.021 |
| 11/13/2017 19:40 | 0.90 | 0.35  | 12.71 | 2.31 | 5.46  | 0.022 | 0.997 |
| 11/13/2017 19:41 | 0.52 | -0.44 | 12.88 | 2.25 | 6.58  | 0.032 | 1.040 |
| 11/13/2017 19:42 | 0.57 | -0.88 | 12.70 | 2.20 | 5.64  | 0.019 | 1.066 |
| 11/13/2017 19:43 | 0.60 | -1.08 | 12.79 | 2.16 | 4.58  | 0.029 | 1.020 |
| 11/13/2017 19:44 | 0.83 | -0.58 | 13.46 | 2.15 | 5.45  | 0.018 | 1.025 |
| 11/13/2017 19:45 | 0.83 | -2.54 | 13.63 | 2.16 | 6.92  | 0.019 | 1.019 |
| 11/13/2017 19:46 | 0.67 | 0.03  | 13.94 | 2.11 | 8.17  | 0.030 | 1.084 |
| 11/13/2017 19:47 | 0.47 | -2.38 | 13.71 | 2.08 | 8.36  | 0.016 | 1.112 |
| 11/13/2017 19:48 | 0.40 | 0.35  | 13.76 | 2.03 | 7.22  | 0.031 | 1.009 |
| 11/13/2017 19:49 | 0.43 | -1.36 | 13.57 | 2.06 | 7.31  | 0.028 | 0.982 |
| 11/13/2017 19:50 | 0.60 | -1.12 | 13.52 | 2.15 | 6.81  | 0.026 | 0.971 |
| 11/13/2017 19:51 | 0.60 | -2.53 | 13.57 | 2.27 | 7.21  | 0.028 | 0.992 |
| 11/13/2017 19:52 | 0.63 | -0.92 | 13.65 | 2.28 | 6.07  | 0.023 | 0.966 |
| 11/13/2017 19:53 | 0.60 | -0.93 | 13.56 | 2.26 | 5.22  | 0.030 | 0.963 |
| 11/13/2017 19:54 | 0.62 | -2.13 | 13.69 | 2.27 | 7.32  | 0.030 | 1.006 |
| 11/13/2017 19:55 | 0.60 | -0.98 | 13.59 | 2.25 | 7.53  | 0.022 | 0.993 |
| 11/13/2017 19:56 | 0.55 | 0.03  | 13.77 | 2.20 | 6.46  | 0.030 | 0.979 |
| 11/13/2017 19:57 | 0.60 | 0.04  | 13.71 | 2.16 | 6.54  | 0.024 | 0.980 |
| 11/13/2017 19:58 | 0.57 | -1.08 | 13.94 | 2.14 | 8.70  | 0.035 | 1.059 |
| 11/13/2017 19:59 | 0.50 | -2.03 | 14.15 | 2.10 | 7.94  | 0.019 | 1.014 |
| 11/13/2017 20:00 | 0.40 | -1.36 | 14.38 | 2.12 | 8.51  | 0.025 | 1.005 |
| 11/13/2017 20:01 | 0.40 | -2.17 | 13.96 | 2.15 | 6.39  | 0.033 | 0.959 |
| 11/13/2017 20:02 | 0.40 | -1.78 | 13.84 | 2.20 | 8.56  | 0.021 | 1.014 |
| 11/13/2017 20:03 | 0.40 | -1.19 | 14.20 | 2.24 | 9.34  | 0.032 | 1.051 |
| 11/13/2017 20:04 | 0.35 | -1.49 | 14.51 | 2.26 | 9.33  | 0.030 | 1.045 |
| 11/13/2017 20:05 | 0.30 | -1.95 | 14.55 | 2.29 | 9.95  | 0.033 | 1.022 |
| 11/13/2017 20:06 | 0.30 | -0.73 | 14.38 | 2.32 | 10.11 | 0.040 | 1.017 |
| 11/13/2017 20:07 | 0.30 | -2.28 | 14.34 | 2.39 | 10.02 | 0.024 | 1.030 |
| 11/13/2017 20:08 | 0.33 | -1.88 | 14.34 | 2.48 | 10.11 | 0.030 | 1.053 |
| 11/13/2017 20:09 | 0.40 | -1.66 | 14.42 | 2.54 | 10.35 | 0.028 | 1.046 |
| 11/13/2017 20:10 | 0.40 | -2.51 | 14.51 | 2.59 | 10.08 | 0.034 | 1.044 |
| 11/13/2017 20:11 | 0.37 | -1.53 | 14.26 | 2.60 | 9.90  | 0.041 | 1.063 |
| 11/13/2017 20:12 | 0.37 | -1.73 | 14.34 | 2.63 | 10.29 | 0.024 | 1.041 |
| 11/13/2017 20:13 | 0.40 | -1.10 | 14.27 | 2.65 | 10.25 | 0.039 | 1.068 |
| 11/13/2017 20:14 | 0.35 | -1.97 | 13.94 | 2.65 | 9.87  | 0.034 | 1.058 |
| 11/13/2017 20:15 | 0.30 | -1.79 | 14.11 | 2.47 | 9.93  | 0.021 | 1.050 |
| 11/13/2017 20:16 | 0.30 | -1.96 | 14.35 | 2.33 | 9.60  | 0.033 | 1.049 |
| 11/13/2017 20:17 | 0.30 | -2.42 | 14.22 | 2.32 | 9.69  | 0.016 | 1.042 |
| 11/13/2017 20:18 | 0.35 | -1.91 | 14.35 | 2.25 | 9.69  | 0.034 | 1.031 |
| 11/13/2017 20:19 | 0.37 | -1.86 | 14.49 | 2.17 | 10.27 | 0.027 | 1.068 |

|                  |      |       |       |        |        |       |       |
|------------------|------|-------|-------|--------|--------|-------|-------|
| 11/13/2017 20:20 | 0.33 | -1.85 | 14.81 | 2.11   | 10.16  | 0.024 | 1.055 |
| 11/13/2017 20:21 | 0.30 | -1.19 | 14.76 | 2.10   | 10.21  | 0.034 | 1.072 |
| 11/13/2017 20:22 | 0.30 | -1.13 | 14.68 | 2.08   | 10.21  | 0.016 | 1.097 |
| 11/13/2017 20:23 | 0.30 | -2.19 | 14.83 | 2.01   | 10.82  | 0.030 | 1.101 |
| 11/13/2017 20:24 | 0.30 | 0.43  | 14.99 | 1.95   | 10.82  | 0.021 | 1.147 |
| 11/13/2017 20:25 | 0.30 | -0.91 | 15.79 | 1.90   | 11.35  | 0.029 | 1.189 |
| 11/13/2017 20:26 | 0.30 | -1.27 | 15.90 | 1.86   | 11.68  | 0.038 | 1.203 |
| 11/13/2017 20:27 | 0.30 | 0.24  | 15.63 | 1.81   | 11.88  | 0.020 | 1.197 |
| 11/13/2017 20:28 | 0.30 | 0.08  | 16.14 | 1.89   | 12.14  | 0.029 | 1.185 |
| 11/13/2017 20:29 | 0.30 | -0.08 | 16.22 | 3.58   | 16.13  | 0.019 | 1.201 |
| 11/13/2017 20:30 | 0.30 | -1.93 | 16.30 | 9.65   | 33.95  | 0.028 | 1.216 |
| 11/13/2017 20:31 | 0.30 | -0.47 | 16.24 | 9.89   | 33.88  | 0.035 | 1.200 |
| 11/13/2017 20:32 | 0.30 | -0.65 | 16.75 | 19.43  | 42.97  | 0.026 | 1.185 |
| 11/13/2017 20:33 | 0.30 | 0.46  | 16.82 | 34.49  | 90.32  | 0.035 | 1.217 |
| 11/13/2017 20:34 | 0.30 | -0.01 | 16.91 | 27.83  | 60.44  | 0.019 | 1.232 |
| 11/13/2017 20:35 | 0.30 | -0.17 | 17.14 | 59.34  | 108.23 | 0.043 | 1.220 |
| 11/13/2017 20:36 | 0.32 | -0.24 | 17.21 | 25.29  | 82.75  | 0.031 | 1.196 |
| 11/13/2017 20:37 | 0.40 | 0.10  | 17.19 | 32.07  | 73.85  | 0.029 | 1.219 |
| 11/13/2017 20:38 | 0.38 | 0.86  | 17.25 | 36.34  | 78.95  | 0.034 | 1.212 |
| 11/13/2017 20:39 | 0.30 | -0.78 | 17.20 | 55.50  | 90.10  | 0.020 | 1.213 |
| 11/13/2017 20:40 | 0.30 | 0.81  | 17.61 | 54.29  | 140.76 | 0.034 | 1.236 |
| 11/13/2017 20:41 | 0.30 | -0.88 | 17.31 | 79.22  | 123.13 | 0.028 | 1.254 |
| 11/13/2017 20:42 | 0.30 | -1.51 | 17.67 | 78.45  | 189.32 | 0.033 | 1.274 |
| 11/13/2017 20:43 | 0.35 | 0.04  | 17.74 | 78.00  | 166.46 | 0.033 | 1.252 |
| 11/13/2017 20:44 | 0.38 | 0.51  | 17.88 | 31.89  | 106.46 | 0.018 | 1.259 |
| 11/13/2017 20:45 | 0.32 | -0.23 | 17.83 | 67.68  | 103.36 | 0.035 | 1.285 |
| 11/13/2017 20:46 | 0.30 | -0.15 | 17.66 | 64.57  | 154.22 | 0.025 | 1.286 |
| 11/13/2017 20:47 | 0.30 | -0.48 | 17.86 | 69.00  | 125.09 | 0.027 | 1.285 |
| 11/13/2017 20:48 | 0.30 | -0.25 | 17.89 | 56.91  | 129.03 | 0.029 | 1.282 |
| 11/13/2017 20:49 | 0.30 | 0.50  | 17.95 | 51.51  | 107.91 | 0.028 | 1.284 |
| 11/13/2017 20:50 | 0.30 | 0.04  | 17.96 | 35.36  | 89.74  | 0.039 | 1.280 |
| 11/13/2017 20:51 | 0.30 | -0.15 | 18.32 | 44.10  | 82.63  | 0.024 | 1.300 |
| 11/13/2017 20:52 | 0.30 | 0.20  | 18.21 | 67.04  | 117.15 | 0.034 | 1.299 |
| 11/13/2017 20:53 | 0.30 | 1.18  | 18.40 | 114.73 | 184.32 | 0.028 | 1.310 |
| 11/13/2017 20:54 | 0.30 | -0.29 | 18.33 | 76.17  | 181.60 | 0.030 | 1.319 |
| 11/13/2017 20:55 | 0.27 | 0.89  | 18.44 | 77.92  | 150.82 | 0.032 | 1.317 |
| 11/13/2017 20:56 | 0.20 | 0.28  | 18.11 | 42.11  | 104.12 | 0.024 | 1.316 |
| 11/13/2017 20:57 | 0.20 | -0.08 | 18.64 | 38.70  | 91.32  | 0.029 | 1.321 |
| 11/13/2017 20:58 | 0.20 | 1.00  | 18.30 | 40.96  | 79.02  | 0.018 | 1.313 |
| 11/13/2017 20:59 | 0.20 | 0.46  | 18.55 | 60.98  | 136.18 | 0.028 | 1.344 |
| 11/13/2017 21:00 | 0.20 | 0.55  | 18.32 | 41.62  | 89.63  | 0.024 | 1.356 |
| 11/13/2017 21:01 | 0.20 | 1.13  | 18.84 | 69.36  | 144.78 | 0.018 | 1.348 |
| 11/13/2017 21:02 | 0.20 | 0.43  | 18.79 | 39.61  | 89.38  | 0.031 | 1.347 |
| 11/13/2017 21:03 | 0.20 | 1.29  | 18.85 | 68.83  | 122.52 | 0.020 | 1.383 |
| 11/13/2017 21:04 | 0.20 | 1.23  | 18.92 | 72.95  | 158.50 | 0.030 | 1.382 |
| 11/13/2017 21:05 | 0.20 | 1.83  | 18.88 | 88.92  | 146.20 | 0.023 | 1.379 |
| 11/13/2017 21:06 | 0.28 | 0.53  | 19.30 | 95.16  | 203.47 | 0.034 | 1.375 |

|                  |      |       |       |        |        |       |       |
|------------------|------|-------|-------|--------|--------|-------|-------|
| 11/13/2017 21:07 | 0.30 | 0.72  | 18.79 | 37.82  | 96.95  | 0.024 | 1.364 |
| 11/13/2017 21:08 | 0.30 | 0.49  | 19.15 | 72.50  | 124.17 | 0.033 | 1.362 |
| 11/13/2017 21:09 | 0.30 | 0.49  | 18.95 | 103.29 | 166.55 | 0.023 | 1.348 |
| 11/13/2017 21:10 | 0.30 | 0.93  | 19.28 | 103.29 | 232.22 | 0.032 | 1.357 |
| 11/13/2017 21:11 | 0.30 | 0.71  | 19.25 | 62.52  | 124.75 | 0.034 | 1.379 |
| 11/13/2017 21:12 | 0.30 | 0.90  | 19.03 | 51.68  | 116.91 | 0.022 | 1.393 |
| 11/13/2017 21:13 | 0.33 | 1.18  | 18.99 | 52.88  | 114.37 | 0.034 | 1.387 |
| 11/13/2017 21:14 | 0.38 | 1.96  | 19.08 | 51.59  | 91.33  | 0.020 | 1.396 |
| 11/13/2017 21:15 | 0.37 | 1.83  | 19.44 | 51.59  | 96.83  | 0.034 | 1.446 |
| 11/13/2017 21:16 | 0.30 | 1.42  | 19.15 | 35.53  | 68.53  | 0.018 | 1.419 |
| 11/13/2017 21:17 | 0.30 | 1.20  | 19.38 | 74.28  | 129.83 | 0.032 | 1.436 |
| 11/13/2017 21:18 | 0.30 | 0.83  | 19.52 | 84.89  | 191.50 | 0.024 | 1.441 |
| 11/13/2017 21:19 | 0.30 | 0.00  | 19.75 | 117.89 | 168.17 | 0.025 | 1.424 |
| 11/13/2017 21:20 | 0.30 | 1.36  | 19.78 | 130.10 | 256.25 | 0.028 | 1.411 |
| 11/13/2017 21:21 | 0.30 | 0.86  | 20.13 | 137.27 | 226.77 | 0.021 | 1.386 |
| 11/13/2017 21:22 | 0.30 | 0.33  | 19.91 | 155.76 | 277.02 | 0.031 | 1.416 |
| 11/13/2017 21:23 | 0.30 | 0.09  | 19.84 | 118.96 | 236.57 | 0.017 | 1.407 |
| 11/13/2017 21:24 | 0.30 | 1.62  | 19.78 | 55.58  | 145.50 | 0.034 | 1.421 |
| 11/13/2017 21:25 | 0.25 | 1.27  | 19.12 | 9.86   | 44.15  | 0.014 | 1.427 |
| 11/13/2017 21:26 | 0.20 | 0.73  | 19.40 | 8.08   | 28.70  | 0.033 | 1.453 |
| 11/13/2017 21:27 | 0.20 | 1.91  | 18.92 | 5.86   | 24.19  | 0.015 | 1.462 |
| 11/13/2017 21:28 | 0.20 | 2.06  | 18.91 | 2.55   | 17.27  | 0.017 | 1.444 |
| 11/13/2017 21:29 | 0.20 | 0.40  | 19.12 | 2.14   | 16.65  | 0.014 | 1.422 |
| 11/13/2017 21:30 | 0.20 | 0.05  | 18.87 | 1.79   | 15.55  | 0.016 | 1.402 |
| 11/13/2017 21:31 | 0.23 | -0.08 | 19.02 | 1.80   | 15.63  | 0.015 | 1.449 |
| 11/13/2017 21:32 | 0.30 | 1.81  | 19.37 | 1.83   | 15.63  | 0.016 | 1.481 |
| 11/13/2017 21:33 | 0.30 | 1.47  | 19.21 | 1.88   | 15.73  | 0.020 | 1.462 |
| 11/13/2017 21:34 | 0.20 | 0.10  | 19.64 | 1.90   | 16.01  | 0.010 | 1.452 |
| 11/13/2017 21:35 | 0.20 | 0.49  | 20.28 | 1.96   | 16.75  | 0.020 | 1.465 |
| 11/13/2017 21:36 | 0.20 | 1.73  | 20.17 | 4.54   | 24.70  | 0.005 | 1.486 |
| 11/13/2017 21:37 | 0.25 | 0.28  | 18.80 | 2.57   | 33.23  | 0.020 | 1.468 |
| 11/13/2017 21:38 | 0.25 | 1.50  | 18.85 | 1.83   | 14.88  | 0.012 | 1.445 |
| 11/13/2017 21:39 | 0.22 | 1.33  | 18.89 | 1.81   | 14.77  | 0.022 | 1.444 |
| 11/13/2017 21:40 | 0.20 | 0.06  | 19.11 | 1.82   | 14.74  | 0.014 | 1.448 |
| 11/13/2017 21:41 | 0.22 | -0.86 | 19.65 | 1.81   | 15.29  | 0.012 | 1.465 |
| 11/13/2017 21:42 | 0.28 | 0.76  | 19.25 | 1.80   | 15.27  | 0.018 | 1.472 |
| 11/13/2017 21:43 | 0.30 | 0.82  | 19.09 | 1.79   | 14.76  | 0.012 | 1.458 |
| 11/13/2017 21:44 | 0.30 | -0.79 | 20.55 | 1.79   | 15.59  | 0.019 | 1.470 |
| 11/13/2017 21:45 | 0.30 | 1.39  | 19.88 | 1.84   | 16.40  | 0.013 | 1.467 |
| 11/13/2017 21:46 | 0.27 | 0.94  | 19.94 | 1.82   | 16.19  | 0.019 | 1.453 |
| 11/13/2017 21:47 | 0.20 | 1.80  | 20.66 | 8.43   | 39.39  | 0.009 | 1.443 |
| 11/13/2017 21:48 | 0.22 | 1.81  | 20.69 | 147.60 | 194.53 | 0.027 | 1.458 |
| 11/13/2017 21:49 | 0.27 | 0.08  | 20.23 | 141.91 | 305.05 | 0.003 | 1.480 |
| 11/13/2017 21:50 | 0.30 | 1.64  | 20.73 | 177.22 | 266.58 | 0.018 | 1.473 |
| 11/13/2017 21:51 | 0.30 | 0.78  | 21.00 | 173.83 | 319.90 | 0.008 | 1.475 |
| 11/13/2017 21:52 | 0.30 | 1.66  | 20.52 | 132.47 | 263.05 | 0.017 | 1.466 |
| 11/13/2017 21:53 | 0.30 | 0.93  | 21.10 | 112.35 | 198.98 | 0.004 | 1.457 |

|                  |      |       |       |        |        |        |       |
|------------------|------|-------|-------|--------|--------|--------|-------|
| 11/13/2017 21:54 | 0.30 | 1.25  | 20.65 | 108.90 | 191.85 | 0.013  | 1.494 |
| 11/13/2017 21:55 | 0.30 | 1.29  | 21.08 | 99.24  | 182.43 | 0.006  | 1.507 |
| 11/13/2017 21:56 | 0.23 | 2.66  | 21.26 | 170.44 | 233.40 | 0.006  | 1.529 |
| 11/13/2017 21:57 | 0.28 | -0.31 | 20.08 | 70.29  | 143.27 | 0.012  | 1.507 |
| 11/13/2017 21:58 | 0.27 | 0.88  | 20.09 | 35.94  | 79.24  | 0.001  | 1.491 |
| 11/13/2017 21:59 | 0.30 | 0.43  | 20.25 | 50.29  | 79.04  | 0.009  | 1.507 |
| 11/13/2017 22:00 | 0.30 | 1.40  | 20.70 | 83.55  | 148.07 | -0.002 | 1.492 |
| 11/13/2017 22:01 | 0.30 | -0.06 | 21.32 | 83.76  | 166.65 | 0.007  | 1.463 |
| 11/13/2017 22:02 | 0.30 | 0.60  | 20.27 | 52.61  | 81.91  | -0.002 | 1.473 |
| 11/13/2017 22:03 | 0.30 | 0.97  | 20.60 | 97.31  | 130.52 | 0.009  | 1.487 |
| 11/13/2017 22:04 | 0.30 | 0.51  | 20.57 | 100.07 | 173.47 | 0.004  | 1.489 |
| 11/13/2017 22:05 | 0.28 | -0.03 | 20.54 | 60.78  | 115.67 | 0.012  | 1.488 |
| 11/13/2017 22:06 | 0.22 | 1.53  | 20.13 | 38.44  | 101.80 | -0.003 | 1.484 |
| 11/13/2017 22:07 | 0.20 | 1.85  | 20.79 | 45.27  | 80.30  | 0.013  | 1.510 |
| 11/13/2017 22:08 | 0.20 | 0.04  | 19.82 | 21.83  | 66.89  | -0.001 | 1.501 |
| 11/13/2017 22:09 | 0.27 | 1.14  | 20.21 | 31.34  | 55.50  | 0.005  | 1.490 |
| 11/13/2017 22:10 | 0.30 | -0.91 | 20.24 | 34.11  | 85.88  | -0.006 | 1.498 |
| 11/13/2017 22:11 | 0.30 | -0.59 | 19.95 | 9.49   | 40.97  | 0.011  | 1.495 |
| 11/13/2017 22:12 | 0.30 | 0.81  | 20.23 | 25.78  | 54.09  | -0.009 | 1.529 |
| 11/13/2017 22:13 | 0.30 | 0.38  | 19.37 | 7.31   | 41.55  | 0.013  | 1.475 |
| 11/13/2017 22:14 | 0.30 | -0.58 | 19.36 | 2.14   | 15.43  | -0.015 | 1.470 |
| 11/13/2017 22:15 | 0.32 | -0.50 | 19.76 | 2.12   | 15.41  | 0.010  | 1.487 |
| 11/13/2017 22:16 | 0.33 | -0.23 | 19.66 | 2.12   | 15.13  | -0.003 | 1.482 |
| 11/13/2017 22:17 | 0.30 | -0.18 | 19.63 | 1.98   | 15.45  | -0.001 | 1.520 |
| 11/13/2017 22:18 | 0.30 | 0.71  | 19.66 | 1.79   | 16.04  | -0.011 | 1.547 |
| 11/13/2017 22:19 | 0.30 | -0.16 | 19.23 | 1.82   | 15.75  | 0.002  | 1.526 |
| 11/13/2017 22:20 | 0.30 | 0.43  | 19.13 | 1.66   | 15.19  | -0.011 | 1.486 |
| 11/13/2017 22:21 | 0.30 | 0.36  | 19.63 | 1.62   | 14.79  | -0.001 | 1.469 |
| 11/13/2017 22:22 | 0.30 | -0.55 | 19.75 | 1.63   | 14.61  | -0.011 | 1.462 |
| 11/13/2017 22:23 | 0.25 | -1.54 | 19.51 | 1.63   | 14.56  | 0.006  | 1.447 |
| 11/13/2017 22:24 | 0.20 | 0.09  | 19.39 | 1.63   | 14.63  | -0.012 | 1.498 |
| 11/13/2017 22:25 | 0.20 | -0.24 | 19.92 | 1.65   | 14.90  | 0.003  | 1.500 |
| 11/13/2017 22:26 | 0.20 | 0.28  | 20.07 | 1.64   | 14.73  | -0.013 | 1.512 |
| 11/13/2017 22:27 | 0.20 | 0.90  | 19.24 | 1.68   | 14.80  | -0.003 | 1.531 |
| 11/13/2017 22:28 | 0.20 | -1.33 | 19.45 | 1.69   | 14.57  | -0.012 | 1.517 |
| 11/13/2017 22:29 | 0.20 | -0.33 | 20.10 | 1.71   | 14.45  | -0.003 | 1.510 |
| 11/13/2017 22:30 | 0.20 | 0.53  | 19.31 | 1.70   | 14.66  | -0.017 | 1.491 |
| 11/13/2017 22:31 | 0.20 | 0.49  | 19.65 | 1.73   | 14.24  | 0.002  | 1.487 |
| 11/13/2017 22:32 | 0.20 | 0.30  | 19.67 | 1.72   | 14.32  | -0.007 | 1.470 |
| 11/13/2017 22:33 | 0.20 | -0.95 | 19.18 | 1.73   | 14.63  | -0.003 | 1.415 |
| 11/13/2017 22:34 | 0.20 | 0.41  | 19.64 | 1.79   | 14.47  | -0.007 | 1.493 |
| 11/13/2017 22:35 | 0.20 | 0.47  | 19.22 | 1.83   | 14.53  | -0.003 | 1.506 |
| 11/13/2017 22:36 | 0.20 | -0.09 | 19.42 | 1.80   | 14.27  | 0.001  | 1.470 |
| 11/13/2017 22:37 | 0.20 | 0.32  | 20.25 | 1.80   | 14.49  | -0.007 | 1.489 |
| 11/13/2017 22:38 | 0.20 | 0.18  | 19.58 | 1.84   | 14.62  | -0.008 | 1.506 |
| 11/13/2017 22:39 | 0.20 | 0.05  | 19.29 | 1.83   | 14.60  | -0.012 | 1.500 |
| 11/13/2017 22:40 | 0.20 | 0.82  | 19.86 | 1.84   | 14.80  | -0.003 | 1.526 |



|                  |      |       |       |        |        |        |       |
|------------------|------|-------|-------|--------|--------|--------|-------|
| 11/13/2017 22:41 | 0.28 | 1.16  | 19.94 | 1.85   | 14.63  | -0.014 | 1.536 |
| 11/13/2017 22:42 | 0.30 | 1.38  | 19.71 | 1.85   | 14.93  | -0.006 | 1.539 |
| 11/13/2017 22:43 | 0.30 | 0.05  | 20.21 | 1.83   | 15.34  | -0.011 | 1.525 |
| 11/13/2017 22:44 | 0.30 | 0.28  | 19.92 | 1.83   | 16.05  | -0.001 | 1.535 |
| 11/13/2017 22:45 | 0.30 | 0.58  | 19.79 | 1.80   | 15.26  | -0.012 | 1.529 |
| 11/13/2017 22:46 | 0.30 | 0.53  | 21.04 | 7.89   | 23.19  | 0.010  | 1.543 |
| 11/13/2017 22:47 | 0.30 | -0.24 | 19.74 | 8.60   | 38.42  | -0.007 | 1.555 |
| 11/13/2017 22:48 | 0.37 | -0.26 | 19.51 | 5.06   | 22.40  | -0.001 | 1.549 |
| 11/13/2017 22:49 | 0.37 | -0.60 | 19.49 | 2.62   | 16.46  | -0.017 | 1.541 |
| 11/13/2017 22:50 | 0.37 | -0.04 | 19.52 | 2.10   | 15.32  | 0.003  | 1.537 |
| 11/13/2017 22:51 | 0.35 | 0.93  | 19.37 | 1.88   | 14.81  | -0.020 | 1.556 |
| 11/13/2017 22:52 | 0.30 | 0.97  | 19.82 | 1.89   | 14.90  | -0.007 | 1.566 |
| 11/13/2017 22:53 | 0.38 | 0.58  | 20.52 | 16.12  | 45.89  | -0.006 | 1.562 |
| 11/13/2017 22:54 | 0.40 | 0.69  | 20.21 | 24.19  | 100.69 | 0.011  | 1.570 |
| 11/13/2017 22:55 | 0.40 | 1.69  | 20.62 | 45.98  | 142.82 | -0.007 | 1.580 |
| 11/13/2017 22:56 | 0.32 | 0.02  | 20.93 | 75.07  | 208.42 | 0.001  | 1.596 |
| 11/13/2017 22:57 | 0.35 | -0.41 | 20.38 | 54.32  | 186.14 | -0.014 | 1.616 |
| 11/13/2017 22:58 | 0.40 | 2.00  | 20.32 | 115.19 | 162.53 | 0.008  | 1.618 |
| 11/13/2017 22:59 | 0.40 | 2.33  | 20.68 | 127.62 | 230.80 | -0.005 | 1.586 |
| 11/13/2017 23:00 | 0.40 | 0.78  | 20.26 | 78.18  | 159.38 | 0.007  | 1.599 |
| 11/13/2017 23:01 | 0.38 | 1.08  | 20.66 | 118.56 | 193.65 | -0.009 | 1.617 |
| 11/13/2017 23:02 | 0.40 | 1.14  | 20.39 | 70.54  | 161.61 | 0.005  | 1.618 |
| 11/13/2017 23:03 | 0.40 | 0.08  | 19.91 | 7.79   | 46.21  | -0.007 | 1.598 |
| 11/13/2017 23:04 | 0.40 | 0.08  | 19.73 | 22.51  | 49.27  | -0.004 | 1.601 |
| 11/13/2017 23:05 | 0.32 | 1.64  | 19.56 | 19.27  | 61.70  | -0.001 | 1.581 |
| 11/13/2017 23:06 | 0.30 | 0.87  | 19.88 | 6.78   | 22.17  | 0.003  | 1.580 |
| 11/13/2017 23:07 | 0.35 | 0.71  | 19.88 | 21.90  | 49.80  | -0.020 | 1.612 |
| 11/13/2017 23:08 | 0.40 | 0.27  | 19.92 | 33.00  | 88.48  | 0.000  | 1.609 |
| 11/13/2017 23:09 | 0.40 | 0.68  | 19.84 | 17.86  | 68.39  | -0.008 | 1.590 |
| 11/13/2017 23:10 | 0.38 | 1.16  | 19.92 | 25.24  | 61.32  | 0.001  | 1.598 |
| 11/13/2017 23:11 | 0.30 | 0.69  | 19.71 | 29.81  | 90.90  | -0.010 | 1.630 |
| 11/13/2017 23:12 | 0.30 | 0.25  | 19.73 | 20.90  | 81.99  | 0.005  | 1.629 |
| 11/13/2017 23:13 | 0.30 | 1.64  | 19.98 | 9.53   | 37.67  | -0.010 | 1.637 |
| 11/13/2017 23:14 | 0.30 | 0.62  | 20.38 | 31.45  | 66.47  | -0.004 | 1.642 |
| 11/13/2017 23:15 | 0.30 | 0.51  | 20.17 | 60.67  | 100.29 | -0.011 | 1.604 |
| 11/13/2017 23:16 | 0.30 | 1.33  | 21.02 | 13.87  | 148.04 | -0.001 | 1.597 |
| 11/13/2017 23:17 | 0.25 | 1.35  | 20.88 | 12.04  | 316.98 | -0.001 | 1.637 |
| 11/13/2017 23:18 | 0.25 | 0.79  | 20.44 | 58.88  | 154.43 | 0.005  | 1.664 |
| 11/13/2017 23:19 | 0.30 | 1.78  | 21.03 | 128.63 | 210.92 | -0.001 | 1.652 |
| 11/13/2017 23:20 | 0.30 | 0.98  | 21.02 | 90.73  | 161.29 | -0.009 | 1.642 |
| 11/13/2017 23:21 | 0.30 | 1.08  | 20.62 | 133.32 | 166.58 | 0.002  | 1.644 |
| 11/13/2017 23:22 | 0.30 | 0.57  | 20.03 | 59.52  | 164.53 | -0.009 | 1.669 |
| 11/13/2017 23:23 | 0.25 | 1.28  | 20.73 | 67.97  | 82.24  | 0.004  | 1.660 |
| 11/13/2017 23:24 | 0.20 | 0.88  | 20.09 | 57.02  | 128.04 | -0.011 | 1.637 |
| 11/13/2017 23:25 | 0.20 | 0.21  | 19.81 | 12.88  | 35.88  | 0.002  | 1.633 |
| 11/13/2017 23:26 | 0.23 | 1.11  | 20.00 | 36.85  | 73.42  | -0.013 | 1.652 |
| 11/13/2017 23:27 | 0.30 | 1.53  | 19.91 | 37.43  | 72.69  | 0.006  | 1.637 |

|                  |      |       |       |       |        |        |       |
|------------------|------|-------|-------|-------|--------|--------|-------|
| 11/13/2017 23:28 | 0.30 | 0.40  | 19.96 | 49.62 | 126.69 | -0.008 | 1.646 |
| 11/13/2017 23:29 | 0.25 | 1.70  | 19.46 | 7.42  | 43.38  | 0.003  | 1.641 |
| 11/13/2017 23:30 | 0.20 | 1.42  | 18.94 | 3.26  | 19.63  | -0.009 | 1.646 |
| 11/13/2017 23:31 | 0.20 | 0.34  | 19.01 | 1.78  | 15.98  | 0.003  | 1.626 |
| 11/13/2017 23:32 | 0.20 | 1.18  | 19.52 | 1.66  | 15.73  | -0.010 | 1.634 |
| 11/13/2017 23:33 | 0.20 | 1.13  | 19.10 | 1.67  | 15.45  | -0.002 | 1.656 |
| 11/13/2017 23:34 | 0.20 | 0.15  | 19.73 | 1.66  | 15.70  | -0.009 | 1.642 |
| 11/13/2017 23:35 | 0.20 | 1.44  | 19.66 | 1.67  | 15.62  | -0.006 | 1.656 |
| 11/13/2017 23:36 | 0.20 | 1.39  | 19.75 | 1.73  | 16.15  | -0.007 | 1.680 |
| 11/13/2017 23:37 | 0.20 | 1.45  | 19.29 | 1.68  | 15.90  | -0.004 | 1.680 |
| 11/13/2017 23:38 | 0.20 | -0.30 | 20.03 | 1.67  | 15.85  | -0.004 | 1.695 |
| 11/13/2017 23:39 | 0.20 | 0.88  | 19.74 | 2.02  | 18.24  | -0.004 | 1.700 |
| 11/13/2017 23:40 | 0.20 | 0.96  | 19.93 | 2.96  | 23.75  | -0.003 | 1.706 |
| 11/13/2017 23:41 | 0.28 | 0.14  | 19.92 | 8.45  | 60.94  | -0.014 | 1.701 |
| 11/13/2017 23:42 | 0.28 | 0.39  | 18.99 | 4.22  | 29.88  | -0.004 | 1.648 |
| 11/13/2017 23:43 | 0.30 | 0.04  | 19.67 | 1.71  | 15.79  | -0.012 | 1.658 |
| 11/13/2017 23:44 | 0.22 | -1.73 | 19.03 | 1.73  | 15.68  | -0.002 | 1.638 |
| 11/13/2017 23:45 | 0.20 | 1.18  | 19.74 | 1.66  | 14.76  | -0.016 | 1.641 |
| 11/13/2017 23:46 | 0.22 | 1.38  | 20.36 | 2.15  | 19.95  | -0.005 | 1.678 |
| 11/13/2017 23:47 | 0.27 | 1.40  | 19.50 | 3.62  | 34.80  | -0.011 | 1.669 |
| 11/13/2017 23:48 | 0.27 | -0.73 | 19.39 | 2.31  | 21.47  | -0.004 | 1.647 |
| 11/13/2017 23:49 | 0.20 | -0.34 | 19.13 | 2.67  | 28.30  | -0.015 | 1.653 |
| 11/13/2017 23:50 | 0.20 | -1.79 | 18.57 | 1.73  | 14.97  | -0.002 | 1.563 |
| 11/13/2017 23:51 | 0.23 | 0.81  | 18.71 | 1.64  | 14.07  | -0.007 | 1.522 |
| 11/13/2017 23:52 | 0.30 | 1.44  | 18.64 | 1.72  | 13.98  | -0.001 | 1.623 |
| 11/13/2017 23:53 | 0.30 | -2.53 | 18.60 | 1.69  | 14.15  | -0.012 | 1.599 |
| 11/13/2017 23:54 | 0.20 | -1.81 | 18.34 | 1.69  | 13.81  | -0.010 | 1.562 |
| 11/13/2017 23:55 | 0.20 | -1.31 | 18.70 | 1.69  | 14.04  | -0.004 | 1.609 |
| 11/13/2017 23:56 | 0.20 | -1.88 | 18.32 | 1.68  | 13.82  | -0.012 | 1.580 |
| 11/13/2017 23:57 | 0.22 | -0.99 | 17.99 | 1.69  | 13.25  | -0.003 | 1.487 |
| 11/13/2017 23:58 | 0.20 | 1.58  | 18.45 | 1.71  | 13.30  | -0.012 | 1.582 |
| 11/13/2017 23:59 | 0.20 | -0.06 | 18.60 | 1.73  | 13.26  | -0.001 | 1.621 |

|                 |      |      |       |      |      |  |       |
|-----------------|------|------|-------|------|------|--|-------|
| 11/15/2017 0:00 | 9.85 | 8.35 | 11.86 | 1.03 | 2.88 |  | 2.394 |
| 11/15/2017 0:01 | 9.33 | 7.22 | 10.70 | 1.00 | 3.04 |  | 2.398 |
| 11/15/2017 0:02 | 9.05 | 8.71 | 12.06 | 1.68 | 3.55 |  | 2.384 |
| 11/15/2017 0:03 | 8.82 | 8.43 | 11.56 | 3.79 | 4.50 |  | 2.388 |
| 11/15/2017 0:04 | 8.83 | 9.00 | 11.31 | 2.31 | 3.87 |  | 2.387 |
| 11/15/2017 0:05 | 8.82 | 7.19 | 11.15 | 0.87 | 2.98 |  | 2.392 |
| 11/15/2017 0:06 | 8.72 | 7.79 | 10.92 | 0.92 | 2.94 |  | 2.395 |
| 11/15/2017 0:07 | 8.42 | 7.03 | 10.02 | 1.34 | 3.45 |  | 2.417 |
| 11/15/2017 0:08 | 7.95 | 6.53 | 10.04 | 1.09 | 3.39 |  | 2.407 |
| 11/15/2017 0:09 | 7.63 | 7.13 | 10.19 | 2.87 | 4.86 |  | 2.402 |
| 11/15/2017 0:10 | 7.58 | 7.41 | 10.54 | 1.11 | 3.31 |  | 2.397 |
| 11/15/2017 0:11 | 7.80 | 7.25 | 10.74 | 0.84 | 3.34 |  | 2.412 |
| 11/15/2017 0:12 | 7.97 | 6.63 | 10.60 | 1.17 | 3.69 |  | 2.400 |

|                 |      |       |       |      |      |       |
|-----------------|------|-------|-------|------|------|-------|
| 11/15/2017 0:13 | 7.97 | 6.45  | 10.58 | 1.42 | 3.95 | 2.402 |
| 11/15/2017 0:14 | 7.73 | 7.03  | 10.16 | 3.14 | 4.97 | 2.397 |
| 11/15/2017 0:15 | 7.58 | 7.28  | 10.33 | 1.88 | 3.85 | 2.406 |
| 11/15/2017 0:16 | 7.55 | 6.70  | 10.55 | 1.12 | 3.67 | 2.405 |
| 11/15/2017 0:17 | 7.72 | 5.62  | 10.75 | 1.16 | 3.67 | 2.409 |
| 11/15/2017 0:18 | 8.00 | 7.88  | 11.56 | 0.90 | 3.52 | 2.393 |
| 11/15/2017 0:19 | 8.10 | 5.82  | 10.18 | 1.57 | 4.65 | 2.426 |
| 11/15/2017 0:20 | 7.87 | 7.31  | 10.80 | 4.57 | 6.50 | 2.443 |
| 11/15/2017 0:21 | 7.65 | 6.93  | 11.61 | 3.07 | 4.56 | 2.430 |
| 11/15/2017 0:22 | 7.77 | 6.95  | 11.22 | 3.20 | 5.68 | 2.434 |
| 11/15/2017 0:23 | 8.03 | 7.00  | 10.98 | 5.68 | 6.89 | 2.453 |
| 11/15/2017 0:24 | 8.07 | 8.00  | 11.03 | 8.32 | 9.44 | 2.446 |
| 11/15/2017 0:25 | 8.18 | 7.81  | 12.22 | 1.00 | 4.27 | 2.424 |
| 11/15/2017 0:26 | 8.50 | 7.78  | 11.70 | 0.95 | 4.07 | 2.431 |
| 11/15/2017 0:27 | 8.72 | 7.08  | 11.56 | 3.14 | 5.13 | 2.449 |
| 11/15/2017 0:28 | 8.43 | 6.69  | 10.28 | 3.28 | 6.52 | 2.453 |
| 11/15/2017 0:29 | 8.07 | 7.03  | 11.85 | 3.62 | 5.35 | 2.444 |
| 11/15/2017 0:30 | 8.08 | 8.49  | 11.75 | 0.94 | 4.08 | 2.441 |
| 11/15/2017 0:31 | 8.42 | 9.32  | 11.53 | 2.09 | 4.94 | 2.453 |
| 11/15/2017 0:32 | 8.83 | 8.38  | 11.81 | 1.28 | 3.76 | 2.456 |
| 11/15/2017 0:33 | 8.75 | 6.96  | 11.48 | 0.73 | 3.90 | 2.471 |
| 11/15/2017 0:34 | 8.72 | 8.16  | 11.51 | 0.72 | 3.92 | 2.474 |
| 11/15/2017 0:35 | 8.58 | 6.44  | 11.39 | 0.74 | 4.09 | 2.469 |
| 11/15/2017 0:36 | 8.25 | 6.47  | 9.90  | 0.85 | 4.20 | 2.447 |
| 11/15/2017 0:37 | 7.78 | 6.52  | 10.14 | 1.45 | 4.89 | 2.439 |
| 11/15/2017 0:38 | 7.52 | 7.45  | 10.82 | 1.12 | 4.58 | 2.454 |
| 11/15/2017 0:39 | 7.75 | 7.48  | 11.33 | 1.56 | 5.01 | 2.457 |
| 11/15/2017 0:40 | 8.02 | 7.42  | 10.51 | 2.83 | 5.77 | 2.445 |
| 11/15/2017 0:41 | 8.02 | 7.98  | 11.44 | 3.65 | 6.04 | 2.457 |
| 11/15/2017 0:42 | 8.00 | 6.67  | 10.64 | 1.24 | 5.23 | 2.480 |
| 11/15/2017 0:43 | 7.85 | 6.50  | 10.95 | 1.95 | 5.73 | 2.459 |
| 11/15/2017 0:44 | 7.83 | 7.37  | 10.78 | 1.66 | 4.65 | 2.464 |
| 11/15/2017 0:45 | 7.90 | 7.22  | 11.10 | 1.64 | 4.39 | 2.475 |
| 11/15/2017 0:46 | 8.02 | 5.53  | 10.13 | 1.45 | 4.72 | 2.464 |
| 11/15/2017 0:47 | 7.82 | 6.49  | 10.39 | 1.11 | 4.93 | 2.443 |
| 11/15/2017 0:48 | 7.52 | 6.84  | 10.79 | 1.03 | 4.75 | 2.455 |
| 11/15/2017 0:49 | 7.55 | 6.65  | 10.39 | 1.12 | 5.10 | 2.461 |
| 11/15/2017 0:50 | 7.65 | 6.16  | 10.22 | 1.06 | 4.94 | 2.451 |
| 11/15/2017 0:51 | 7.67 | 5.56  | 10.08 | 0.98 | 4.72 | 2.433 |
| 11/15/2017 0:52 | 7.35 | 5.66  | 9.20  | 0.85 | 4.66 | 2.451 |
| 11/15/2017 0:53 | 6.98 | 6.21  | 9.47  | 0.87 | 4.82 | 2.471 |
| 11/15/2017 0:54 | 6.85 | 6.40  | 10.44 | 0.95 | 4.84 | 2.473 |
| 11/15/2017 0:55 | 7.37 | 7.48  | 11.36 | 1.04 | 4.85 | 2.475 |
| 11/15/2017 0:56 | 8.00 | 7.85  | 11.59 | 1.07 | 4.83 | 2.470 |
| 11/15/2017 0:57 | 8.50 | 8.68  | 12.07 | 1.10 | 5.02 | 2.448 |
| 11/15/2017 0:58 | 8.95 | 9.43  | 13.74 | 1.26 | 5.00 | 2.468 |
| 11/15/2017 0:59 | 9.75 | 10.63 | 14.45 | 1.40 | 4.80 | 2.464 |

|                 |       |       |       |      |      |       |
|-----------------|-------|-------|-------|------|------|-------|
| 11/15/2017 1:00 | 10.60 | 11.66 | 14.71 | 1.38 | 4.72 | 2.449 |
| 11/15/2017 1:01 | 11.42 | 12.14 | 15.79 | 1.29 | 4.85 | 2.430 |
| 11/15/2017 1:02 | 12.15 | 12.13 | 16.05 | 1.23 | 4.80 | 2.432 |
| 11/15/2017 1:03 | 12.37 | 11.60 | 14.70 | 1.18 | 5.06 | 2.421 |
| 11/15/2017 1:04 | 12.30 | 10.58 | 15.02 | 1.13 | 4.82 | 2.414 |
| 11/15/2017 1:05 | 11.83 | 10.92 | 15.30 | 1.08 | 5.32 | 2.440 |
| 11/15/2017 1:06 | 11.70 | 11.03 | 14.90 | 1.05 | 5.03 | 2.443 |
| 11/15/2017 1:07 | 11.73 | 11.28 | 15.32 | 0.97 | 5.04 | 2.445 |
| 11/15/2017 1:08 | 11.93 | 11.60 | 16.08 | 0.95 | 5.24 | 2.445 |
| 11/15/2017 1:09 | 12.08 | 12.27 | 15.37 | 0.90 | 5.05 | 2.435 |
| 11/15/2017 1:10 | 12.37 | 12.02 | 15.79 | 0.93 | 5.00 | 2.424 |
| 11/15/2017 1:11 | 12.25 | 10.38 | 15.27 | 0.87 | 4.96 | 2.415 |
| 11/15/2017 1:12 | 12.30 | 12.35 | 15.88 | 0.88 | 5.07 | 2.432 |
| 11/15/2017 1:13 | 12.30 | 13.39 | 16.06 | 0.92 | 4.95 | 2.410 |
| 11/15/2017 1:14 | 12.17 | 10.76 | 15.00 | 0.87 | 5.02 | 2.410 |
| 11/15/2017 1:15 | 12.02 | 12.76 | 15.00 | 0.89 | 5.00 | 2.414 |
| 11/15/2017 1:16 | 11.58 | 10.80 | 14.38 | 0.87 | 5.10 | 2.417 |
| 11/15/2017 1:17 | 11.42 | 10.08 | 14.67 | 0.85 | 5.21 | 2.403 |
| 11/15/2017 1:18 | 11.38 | 11.61 | 14.81 | 0.90 | 5.31 | 2.423 |
| 11/15/2017 1:19 | 11.58 | 10.98 | 15.60 | 0.92 | 5.16 | 2.421 |
| 11/15/2017 1:20 | 11.90 | 10.73 | 15.22 | 0.98 | 5.04 | 2.434 |
| 11/15/2017 1:21 | 12.03 | 11.16 | 14.79 | 1.18 | 5.49 | 2.450 |
| 11/15/2017 1:22 | 11.82 | 9.88  | 14.35 | 1.81 | 5.72 | 2.440 |
| 11/15/2017 1:23 | 11.38 | 10.71 | 14.77 | 2.53 | 6.18 | 2.442 |
| 11/15/2017 1:24 | 11.07 | 9.64  | 13.98 | 4.11 | 7.29 | 2.447 |
| 11/15/2017 1:25 | 10.83 | 9.30  | 14.17 | 2.56 | 6.08 | 2.449 |
| 11/15/2017 1:26 | 10.88 | 9.14  | 14.67 | 1.41 | 5.79 | 2.445 |
| 11/15/2017 1:27 | 10.85 | 10.98 | 14.63 | 0.94 | 5.01 | 2.434 |
| 11/15/2017 1:28 | 10.62 | 7.91  | 13.00 | 0.98 | 5.82 | 2.433 |
| 11/15/2017 1:29 | 9.75  | 7.13  | 11.83 | 0.77 | 5.12 | 2.452 |
| 11/15/2017 1:30 | 8.77  | 8.12  | 11.17 | 1.06 | 5.78 | 2.461 |
| 11/15/2017 1:31 | 8.07  | 7.13  | 11.27 | 0.89 | 5.77 | 2.448 |
| 11/15/2017 1:32 | 7.87  | 8.17  | 11.32 | 1.55 | 5.69 | 2.436 |
| 11/15/2017 1:33 | 7.75  | 8.33  | 11.27 | 1.90 | 6.61 | 2.444 |
| 11/15/2017 1:34 | 8.02  | 8.84  | 12.36 | 1.14 | 5.54 | 2.438 |
| 11/15/2017 1:35 | 8.38  | 7.46  | 12.17 | 1.22 | 5.82 | 2.447 |
| 11/15/2017 1:36 | 8.67  | 8.89  | 11.91 | 1.05 | 5.31 | 2.461 |
| 11/15/2017 1:37 | 8.52  | 7.08  | 10.66 | 0.52 | 5.45 | 2.446 |
| 11/15/2017 1:38 | 7.72  | 6.11  | 9.46  | 0.94 | 5.99 | 2.445 |
| 11/15/2017 1:39 | 7.03  | 4.83  | 9.48  | 1.27 | 5.99 | 2.448 |
| 11/15/2017 1:40 | 6.48  | 6.73  | 10.07 | 0.64 | 5.42 | 2.452 |
| 11/15/2017 1:41 | 6.70  | 6.83  | 10.08 | 0.56 | 5.28 | 2.465 |
| 11/15/2017 1:42 | 6.70  | 5.43  | 9.74  | 2.76 | 7.23 | 2.472 |
| 11/15/2017 1:43 | 6.65  | 5.46  | 9.67  | 2.03 | 5.88 | 2.460 |
| 11/15/2017 1:44 | 6.50  | 6.43  | 9.49  | 0.90 | 5.73 | 2.452 |
| 11/15/2017 1:45 | 6.77  | 5.85  | 10.92 | 1.61 | 6.13 | 2.428 |
| 11/15/2017 1:46 | 7.30  | 7.72  | 11.11 | 1.63 | 5.36 | 2.438 |

|                 |      |      |       |      |      |       |
|-----------------|------|------|-------|------|------|-------|
| 11/15/2017 1:47 | 7.75 | 6.72 | 10.98 | 2.44 | 7.39 | 2.447 |
| 11/15/2017 1:48 | 8.02 | 7.06 | 10.29 | 0.73 | 5.47 | 2.446 |
| 11/15/2017 1:49 | 7.83 | 6.16 | 10.33 | 0.66 | 5.66 | 2.443 |
| 11/15/2017 1:50 | 7.52 | 5.38 | 9.46  | 0.72 | 5.40 | 2.459 |
| 11/15/2017 1:51 | 6.95 | 4.77 | 8.80  | 1.04 | 5.48 | 2.465 |
| 11/15/2017 1:52 | 6.58 | 4.65 | 9.32  | 0.79 | 5.56 | 2.468 |
| 11/15/2017 1:53 | 6.63 | 6.70 | 10.98 | 0.94 | 5.78 | 2.484 |
| 11/15/2017 1:54 | 7.40 | 7.47 | 10.75 | 0.64 | 5.43 | 2.450 |
| 11/15/2017 1:55 | 7.95 | 7.40 | 10.48 | 0.64 | 5.69 | 2.450 |
| 11/15/2017 1:56 | 8.10 | 5.96 | 10.21 | 0.62 | 5.68 | 2.470 |
| 11/15/2017 1:57 | 7.70 | 6.98 | 9.58  | 0.64 | 5.66 | 2.475 |
| 11/15/2017 1:58 | 7.40 | 5.43 | 8.89  | 0.62 | 5.89 | 2.467 |
| 11/15/2017 1:59 | 6.60 | 4.96 | 8.97  | 0.56 | 5.69 | 2.453 |
| 11/15/2017 2:00 | 6.03 | 6.63 | 8.28  | 0.50 | 5.98 | 2.443 |
| 11/15/2017 2:01 | 4.58 | 4.15 | 8.71  | 0.48 | 5.87 | 2.457 |
| 11/15/2017 2:02 | 2.78 | 5.12 | 9.68  | 0.50 | 5.72 | 2.448 |
| 11/15/2017 2:03 | 1.55 | 6.24 | 9.67  | 0.53 | 5.67 | 2.459 |
| 11/15/2017 2:04 | 1.13 | 7.62 | 10.32 | 0.55 | 5.71 | 2.474 |
| 11/15/2017 2:05 | 1.10 | 8.60 | 11.04 | 0.54 | 5.77 | 2.494 |
| 11/15/2017 2:06 | 1.10 | 8.88 | 12.46 | 0.64 | 5.70 | 2.482 |
| 11/15/2017 2:07 | 1.15 | 9.72 | 12.72 | 0.67 | 5.45 | 2.484 |
| 11/15/2017 2:08 | 1.23 | 8.55 | 12.53 | 0.64 | 5.71 | 2.481 |
| 11/15/2017 2:09 | 1.30 | 8.92 | 12.38 | 0.69 | 5.90 | 2.466 |
| 11/15/2017 2:10 | 1.33 | 9.55 | 13.02 | 0.64 | 5.57 | 2.457 |
| 11/15/2017 2:11 | 1.40 | 8.78 | 12.38 | 0.62 | 5.76 | 2.451 |
| 11/15/2017 2:12 | 1.32 | 7.68 | 10.52 | 0.60 | 5.57 | 2.473 |
| 11/15/2017 2:13 | 1.23 | 8.64 | 11.51 | 0.55 | 5.83 | 2.472 |
| 11/15/2017 2:14 | 1.22 | 9.33 | 12.69 | 0.57 | 5.57 | 2.473 |
| 11/15/2017 2:15 | 1.30 | 9.08 | 12.50 | 0.55 | 5.61 | 2.487 |
| 11/15/2017 2:16 | 1.30 | 8.06 | 12.04 | 0.51 | 5.73 | 2.489 |
| 11/15/2017 2:17 | 1.25 | 8.99 | 12.53 | 0.48 | 5.61 | 2.481 |
| 11/15/2017 2:18 | 1.20 | 7.10 | 11.40 | 0.46 | 5.66 | 2.475 |
| 11/15/2017 2:19 | 1.20 | 6.02 | 10.59 | 0.43 | 5.98 | 2.486 |
| 11/15/2017 2:20 | 1.20 | 6.15 | 10.61 | 0.44 | 5.97 | 2.498 |
| 11/15/2017 2:21 | 1.10 | 8.66 | 10.68 | 0.37 | 5.64 | 2.494 |
| 11/15/2017 2:22 | 1.10 | 6.03 | 10.27 | 0.40 | 6.08 | 2.503 |
| 11/15/2017 2:23 | 1.05 | 7.13 | 10.34 | 0.39 | 5.96 | 2.505 |
| 11/15/2017 2:24 | 1.08 | 6.63 | 10.09 | 0.37 | 5.99 | 2.484 |
| 11/15/2017 2:25 | 1.10 | 7.55 | 10.01 | 0.33 | 5.97 | 2.482 |
| 11/15/2017 2:26 | 1.10 | 6.21 | 10.23 | 0.32 | 5.83 | 2.496 |
| 11/15/2017 2:27 | 1.10 | 6.95 | 10.44 | 0.34 | 5.88 | 2.490 |
| 11/15/2017 2:28 | 1.10 | 7.93 | 11.29 | 0.36 | 6.14 | 2.465 |
| 11/15/2017 2:29 | 1.97 | 8.56 | 11.56 | 0.43 | 5.99 | 2.475 |
| 11/15/2017 2:30 | 4.63 | 8.01 | 11.38 | 0.42 | 6.03 | 2.479 |
| 11/15/2017 2:31 | 7.30 | 8.40 | 11.44 | 0.43 | 6.12 | 2.486 |
| 11/15/2017 2:32 | 9.07 | 8.69 | 11.14 | 0.44 | 6.01 | 2.499 |
| 11/15/2017 2:33 | 9.15 | 9.28 | 11.38 | 0.39 | 6.08 | 2.504 |

|                 |        |      |       |      |      |       |
|-----------------|--------|------|-------|------|------|-------|
| 11/15/2017 2:34 | 9.30   | 8.83 | 11.09 | 0.40 | 6.24 | 2.499 |
| 11/15/2017 2:35 | 9.08   | 7.58 | 9.55  | 0.40 | 6.42 | 2.501 |
| 11/15/2017 2:36 | 8.65   | 6.42 | 9.18  | 0.35 | 6.26 | 2.505 |
| 11/15/2017 2:37 | 8.23   | 6.80 | 9.56  | 0.33 | 6.06 | 2.496 |
| 11/15/2017 2:38 | 7.92   | 5.53 | 8.33  | 0.31 | 5.86 | 2.507 |
| 11/15/2017 2:39 | 7.50   | 4.73 | 7.35  | 0.61 | 6.80 | 2.503 |
| 11/15/2017 2:40 | 6.80   | 5.24 | 7.20  | 3.22 | 8.20 | 2.527 |
| 11/15/2017 2:41 | 6.28   | 5.83 | 7.54  | 1.61 | 7.35 | 2.530 |
| 11/15/2017 2:42 | 6.48   | 5.44 | 7.52  | 1.45 | 7.13 | 2.512 |
| 11/15/2017 2:43 | 6.40   | 4.63 | 6.62  | 3.16 | 7.72 | 2.531 |
| 11/15/2017 2:44 | 6.65   | 7.46 | 7.72  | 0.58 | 6.50 | 2.515 |
| 11/15/2017 2:45 | 6.70   | 6.60 | 7.76  | 0.50 | 6.04 | 2.508 |
| 11/15/2017 2:46 | 7.07   | 5.48 | 7.01  | 0.95 | 6.70 | 2.524 |
| 11/15/2017 2:47 | 6.92   | 5.64 | 6.20  | 1.17 | 6.62 | 2.511 |
| 11/15/2017 2:48 | 6.22   | 4.63 | 5.94  | 1.25 | 7.62 | 2.530 |
| 11/15/2017 2:49 | 5.72   | 4.26 | 4.89  | 0.89 | 6.36 | 2.530 |
| 11/15/2017 2:50 | 5.32   | 2.77 | 4.42  | 0.68 | 6.57 | 2.535 |
| 11/15/2017 2:51 | 5.25   | 5.94 | 5.16  | 0.71 | 6.66 | 2.547 |
| 11/15/2017 2:52 | 5.37   | 4.65 | 4.09  | 1.39 | 7.11 | 2.546 |
| 11/15/2017 2:53 | 5.28   | 3.71 | 3.27  | 1.58 | 7.54 | 2.549 |
| 11/15/2017 2:54 | 5.03   | 3.26 | 1.73  | 0.92 | 6.79 | 2.556 |
| 11/15/2017 2:55 | 4.83   | 4.75 | 2.71  | 0.76 | 6.72 | 2.553 |
| 11/15/2017 2:56 | 4.90   | 2.18 | 3.80  | 1.74 | 7.92 | 2.551 |
| 11/15/2017 2:57 | 5.30   | 6.08 | 7.17  | 2.41 | 7.71 | 2.542 |
| 11/15/2017 2:58 | 5.90   | 6.48 | 7.34  | 0.73 | 6.50 | 2.530 |
| 11/15/2017 2:59 | 6.23   | 3.68 | 6.85  | 0.76 | 6.77 | 2.519 |
| 11/15/2017 3:00 | 6.25   | 4.85 | 7.15  | 0.73 | 6.99 | 2.532 |
| 11/15/2017 3:01 | 6.03   | 5.70 | 7.24  | 0.72 | 7.00 | 2.550 |
| 11/15/2017 3:02 | 5.82   | 5.15 | 6.89  | 1.58 | 7.80 | 2.566 |
| 11/15/2017 3:03 | 5.92   | 4.43 | 7.51  | 0.56 | 6.85 | 2.559 |
| 11/15/2017 3:04 | 5.87   | 5.57 | 7.33  | 0.49 | 7.23 | 2.552 |
| 11/15/2017 3:05 | 6.00   | 4.69 | 7.42  | 2.28 | 8.70 | 2.556 |
| 11/15/2017 3:06 | 5.80   | 5.19 | 7.15  | 2.07 | 7.27 | 2.565 |
| 11/15/2017 3:07 | -2.18  | 3.69 | 6.35  | 2.01 | 7.72 | 2.559 |
| 11/15/2017 3:08 | -14.52 | 3.66 | 6.22  | 1.23 | 7.70 | 2.567 |
| 11/15/2017 3:09 | -25.68 | 3.49 | 5.61  | 2.13 | 8.17 | 2.571 |
| 11/15/2017 3:10 | -27.60 | 3.07 | 4.83  | 0.85 | 7.33 | 2.570 |
| 11/15/2017 3:11 | -27.60 | 4.12 | 4.15  | 0.53 | 7.36 | 2.564 |
| 11/15/2017 3:12 | -27.60 | 5.21 | 4.37  | 0.53 | 7.15 | 2.570 |
| 11/15/2017 3:13 | -27.60 | 3.91 | 4.14  | 0.74 | 8.00 | 2.586 |
| 11/15/2017 3:14 | -27.60 | 3.44 | 5.22  | 3.75 | 8.24 | 2.591 |
| 11/15/2017 3:15 | -27.60 | 5.61 | 5.75  | 1.87 | 8.79 | 2.585 |
| 11/15/2017 3:16 | -27.60 | 4.16 | 6.02  | 0.70 | 7.57 | 2.582 |
| 11/15/2017 3:17 | -27.60 | 2.99 | 5.67  | 1.90 | 8.54 | 2.597 |
| 11/15/2017 3:18 | -27.60 | 5.58 | 6.15  | 1.46 | 7.87 | 2.583 |
| 11/15/2017 3:19 | -27.60 | 4.12 | 6.95  | 0.56 | 7.65 | 2.578 |
| 11/15/2017 3:20 | -27.60 | 4.11 | 7.20  | 0.57 | 7.59 | 2.585 |

|                 |        |       |       |      |       |       |
|-----------------|--------|-------|-------|------|-------|-------|
| 11/15/2017 3:21 | -27.60 | 5.42  | 6.83  | 0.62 | 7.56  | 2.586 |
| 11/15/2017 3:22 | -27.60 | 4.90  | 6.68  | 0.75 | 7.94  | 2.601 |
| 11/15/2017 3:23 | -27.60 | 2.22  | 5.98  | 3.52 | 8.29  | 2.603 |
| 11/15/2017 3:24 | -27.60 | 2.40  | 5.51  | 3.53 | 10.12 | 2.624 |
| 11/15/2017 3:25 | -27.60 | 4.33  | 6.68  | 1.39 | 8.21  | 2.621 |
| 11/15/2017 3:26 | -27.60 | 5.05  | 6.78  | 0.96 | 7.81  | 2.601 |
| 11/15/2017 3:27 | -27.60 | 4.10  | 6.51  | 0.73 | 7.86  | 2.600 |
| 11/15/2017 3:28 | -27.60 | 4.19  | 6.58  | 0.67 | 7.81  | 2.597 |
| 11/15/2017 3:29 | -27.60 | 4.39  | 6.57  | 0.68 | 7.85  | 2.595 |
| 11/15/2017 3:30 | -27.60 | 3.65  | 6.47  | 0.72 | 8.04  | 2.606 |
| 11/15/2017 3:31 | -27.60 | 4.66  | 6.69  | 0.67 | 7.79  | 2.621 |
| 11/15/2017 3:32 | -27.60 | 3.48  | 6.56  | 0.67 | 7.95  | 2.610 |
| 11/15/2017 3:33 | -27.60 | 3.48  | 6.03  | 1.05 | 8.78  | 2.617 |
| 11/15/2017 3:34 | -27.60 | 3.96  | 6.20  | 1.72 | 8.94  | 2.636 |
| 11/15/2017 3:35 | -27.60 | 5.13  | 7.37  | 1.37 | 8.10  | 2.624 |
| 11/15/2017 3:36 |        | 4.77  | 6.57  | 2.86 | 9.24  | 2.627 |
| 11/15/2017 3:37 |        | 4.79  | 6.28  | 2.14 | 9.09  | 2.625 |
| 11/15/2017 3:38 |        | 4.49  | 6.48  | 1.17 | 8.47  | 2.598 |
| 11/15/2017 3:39 |        | 5.14  | 7.38  | 0.89 | 8.12  | 2.587 |
| 11/15/2017 3:40 |        | 5.81  | 8.43  | 0.93 | 8.29  | 2.598 |
| 11/15/2017 3:41 |        | 5.75  | 8.25  | 0.91 | 8.23  | 2.591 |
| 11/15/2017 3:42 |        | 5.87  | 7.84  | 0.89 | 8.08  | 2.592 |
| 11/15/2017 3:43 |        | 5.02  | 7.21  | 0.87 | 8.31  | 2.606 |
| 11/15/2017 3:44 |        | 5.12  | 6.92  | 0.98 | 8.53  | 2.619 |
| 11/15/2017 3:45 |        | 4.64  | 6.12  | 1.65 | 9.10  | 2.626 |
| 11/15/2017 3:46 |        | 5.04  | 6.08  | 1.51 | 8.27  | 2.609 |
| 11/15/2017 3:47 |        | 6.16  | 7.51  | 0.91 | 8.40  | 2.609 |
| 11/15/2017 3:48 |        | 4.60  | 7.36  | 1.00 | 8.23  | 2.617 |
| 11/15/2017 3:49 |        | 5.98  | 7.59  | 1.02 | 8.96  | 2.602 |
| 11/15/2017 3:50 |        | 4.05  | 6.83  | 1.71 | 8.18  | 2.601 |
| 11/15/2017 3:51 |        | 5.50  | 8.40  | 1.51 | 8.07  | 2.619 |
| 11/15/2017 3:52 |        | 5.64  | 8.42  | 1.51 | 8.35  | 2.598 |
| 11/15/2017 3:53 |        | 5.18  | 7.73  | 1.71 | 8.08  | 2.617 |
| 11/15/2017 3:54 |        | 5.19  | 6.64  | 1.90 | 8.33  | 2.611 |
| 11/15/2017 3:55 |        | 6.51  | 7.70  | 1.96 | 8.13  | 2.618 |
| 11/15/2017 3:56 |        | 5.21  | 8.09  | 2.06 | 8.01  | 2.604 |
| 11/15/2017 3:57 |        | 5.08  | 7.67  | 2.31 | 8.13  | 2.613 |
| 11/15/2017 3:58 |        | 6.08  | 7.70  | 2.59 | 8.00  | 2.622 |
| 11/15/2017 3:59 |        | 5.13  | 7.41  | 2.70 | 8.36  | 2.616 |
| 11/15/2017 4:00 |        | 6.17  | 7.44  | 2.71 | 8.63  | 2.602 |
| 11/15/2017 4:01 |        | 6.48  | 8.53  | 2.60 | 8.23  | 2.615 |
| 11/15/2017 4:02 |        | 6.06  | 8.60  | 2.22 | 8.63  | 2.616 |
| 11/15/2017 4:03 |        | 7.14  | 10.04 | 1.50 | 8.35  | 2.612 |
| 11/15/2017 4:04 |        | 7.94  | 10.70 | 1.17 | 8.37  | 2.617 |
| 11/15/2017 4:05 |        | 9.09  | 12.06 | 1.49 | 8.57  | 2.620 |
| 11/15/2017 4:06 |        | 11.27 | 13.11 | 0.85 | 8.38  | 2.617 |
| 11/15/2017 4:07 |        | 10.35 | 12.30 | 0.55 | 8.18  | 2.608 |

|                 |       |       |      |      |       |
|-----------------|-------|-------|------|------|-------|
| 11/15/2017 4:08 | 9.23  | 12.21 | 0.46 | 8.50 | 2.602 |
| 11/15/2017 4:09 | 9.83  | 12.43 | 0.44 | 8.46 | 2.611 |
| 11/15/2017 4:10 | 10.78 | 12.79 | 0.47 | 8.78 | 2.609 |
| 11/15/2017 4:11 | 9.38  | 13.08 | 0.42 | 8.38 | 2.597 |
| 11/15/2017 4:12 | 10.44 | 13.20 | 0.39 | 8.38 | 2.612 |
| 11/15/2017 4:13 | 10.02 | 12.56 | 0.34 | 8.44 | 2.627 |
| 11/15/2017 4:14 | 8.93  | 12.40 | 0.32 | 8.45 | 2.624 |
| 11/15/2017 4:15 | 9.61  | 12.07 | 0.32 | 8.54 | 2.614 |
| 11/15/2017 4:16 | 9.96  | 11.65 | 0.31 | 8.31 | 2.604 |
| 11/15/2017 4:17 | 9.56  | 11.19 | 0.27 | 8.61 | 2.598 |
| 11/15/2017 4:18 | 7.51  | 10.55 | 0.59 | 8.80 | 2.593 |
| 11/15/2017 4:19 | 6.78  | 10.18 | 0.85 | 8.73 | 2.588 |
| 11/15/2017 4:20 | 6.37  | 9.97  | 0.49 | 8.53 | 2.586 |
| 11/15/2017 4:21 | 6.59  | 9.03  | 0.62 | 8.47 | 2.586 |
| 11/15/2017 4:22 | 6.57  | 9.17  | 0.82 | 8.45 | 2.623 |
| 11/15/2017 4:23 | 7.15  | 8.47  | 1.00 | 8.63 | 2.624 |
| 11/15/2017 4:24 | 6.53  | 8.19  | 0.97 | 8.42 | 2.625 |
| 11/15/2017 4:25 | 5.98  | 8.32  | 0.90 | 8.39 | 2.607 |
| 11/15/2017 4:26 | 7.14  | 9.12  | 0.87 | 8.53 | 2.609 |
| 11/15/2017 4:27 | 7.87  | 8.98  | 0.89 | 8.31 | 2.618 |
| 11/15/2017 4:28 | 5.34  | 8.69  | 0.84 | 7.95 | 2.597 |
| 11/15/2017 4:29 | 7.55  | 8.74  | 0.87 | 8.31 | 2.587 |
| 11/15/2017 4:30 | 7.49  | 8.90  | 0.83 | 8.23 | 2.604 |
| 11/15/2017 4:31 | 7.23  | 8.95  | 0.92 | 8.29 | 2.628 |
| 11/15/2017 4:32 | 8.13  | 10.48 | 0.89 | 8.01 | 2.628 |
| 11/15/2017 4:33 | 9.52  | 11.17 | 1.37 | 8.15 | 2.620 |
| 11/15/2017 4:34 | 8.64  | 11.22 | 0.71 | 8.29 | 2.616 |
| 11/15/2017 4:35 | 8.68  | 10.98 | 0.55 | 8.18 | 2.630 |
| 11/15/2017 4:36 | 10.45 | 11.26 | 1.08 | 8.34 | 2.614 |
| 11/15/2017 4:37 | 10.04 | 11.57 | 0.88 | 8.14 | 2.611 |
| 11/15/2017 4:38 | 9.36  | 11.77 | 0.98 | 8.41 | 2.624 |
| 11/15/2017 4:39 | 10.04 | 11.71 | 0.79 | 8.38 | 2.599 |
| 11/15/2017 4:40 | 9.27  | 11.60 | 1.10 | 8.36 | 2.585 |
| 11/15/2017 4:41 | 9.34  | 11.97 | 0.83 | 8.01 | 2.580 |
| 11/15/2017 4:42 | 9.50  | 11.84 | 1.29 | 8.03 | 2.577 |
| 11/15/2017 4:43 | 9.38  | 11.62 | 0.63 | 7.77 | 2.559 |
| 11/15/2017 4:44 | 10.06 | 10.81 | 0.54 | 7.78 | 2.555 |
| 11/15/2017 4:45 | 10.16 | 10.08 | 0.64 | 7.92 | 2.531 |
| 11/15/2017 4:46 | 9.31  | 9.91  | 0.87 | 7.83 | 2.544 |
| 11/15/2017 4:47 | 9.86  | 11.88 | 0.45 | 7.61 | 2.535 |
| 11/15/2017 4:48 | 9.24  | 11.28 | 0.20 | 7.62 | 2.554 |
| 11/15/2017 4:49 | 8.21  | 11.12 | 0.22 | 7.39 | 2.526 |
| 11/15/2017 4:50 | 9.75  | 11.21 | 0.22 | 7.20 | 2.528 |
| 11/15/2017 4:51 | 8.87  | 10.44 | 0.31 | 7.17 | 2.508 |
| 11/15/2017 4:52 | 8.69  | 9.42  | 0.38 | 7.06 | 2.509 |
| 11/15/2017 4:53 | 9.63  | 7.73  | 0.73 | 7.14 | 2.488 |
| 11/15/2017 4:54 | 7.87  | 9.37  | 0.70 | 6.95 | 2.493 |



|                 |       |       |       |      |       |
|-----------------|-------|-------|-------|------|-------|
| 11/15/2017 4:55 | 8.01  | 9.92  | 1.45  | 7.12 | 2.494 |
| 11/15/2017 4:56 | 8.78  | 10.14 | 2.72  | 7.56 | 2.488 |
| 11/15/2017 4:57 | 8.83  | 9.77  | 2.35  | 7.21 | 2.451 |
| 11/15/2017 4:58 | 9.22  | 10.25 | 2.34  | 7.52 | 2.479 |
| 11/15/2017 4:59 | 7.12  | 10.73 | 3.60  | 7.40 | 2.476 |
| 11/15/2017 5:00 | 8.25  | 10.76 | 4.04  | 7.54 | 2.457 |
| 11/15/2017 5:01 | 7.92  | 11.43 | 2.37  | 7.03 | 2.447 |
| 11/15/2017 5:02 | 7.07  | 11.39 | 2.05  | 6.69 | 2.460 |
| 11/15/2017 5:03 | 7.33  | 10.83 | 7.02  | 7.33 | 2.457 |
| 11/15/2017 5:04 | 8.27  | 11.94 | 3.10  | 6.95 | 2.449 |
| 11/15/2017 5:05 | 7.91  | 12.24 | 1.74  | 6.34 | 2.436 |
| 11/15/2017 5:06 | 10.13 | 13.12 | 1.67  | 6.11 | 2.435 |
| 11/15/2017 5:07 | 8.76  | 12.95 | 2.77  | 6.62 | 2.413 |
| 11/15/2017 5:08 | 7.14  | 12.43 | 3.11  | 6.52 | 2.425 |
| 11/15/2017 5:09 | 8.23  | 12.51 | 1.56  | 5.95 | 2.403 |
| 11/15/2017 5:10 | 9.90  | 13.06 | 1.85  | 6.41 | 2.410 |
| 11/15/2017 5:11 | 8.53  | 12.98 | 2.00  | 6.22 | 2.375 |
| 11/15/2017 5:12 | 9.58  | 13.37 | 2.19  | 5.59 | 2.369 |
| 11/15/2017 5:13 | 10.48 | 13.81 | 2.80  | 6.23 | 2.381 |
| 11/15/2017 5:14 | 9.79  | 13.22 | 1.62  | 5.72 | 2.385 |
| 11/15/2017 5:15 | 11.05 | 13.85 | 2.27  | 5.49 | 2.377 |
| 11/15/2017 5:16 | 11.20 | 15.09 | 2.12  | 5.32 | 2.361 |
| 11/15/2017 5:17 | 10.68 | 14.03 | 2.25  | 5.18 | 2.343 |
| 11/15/2017 5:18 | 9.73  | 14.14 | 2.69  | 5.76 | 2.343 |
| 11/15/2017 5:19 | 9.59  | 13.71 | 4.63  | 5.65 | 2.359 |
| 11/15/2017 5:20 | 10.39 | 13.36 | 6.25  | 6.73 | 2.339 |
| 11/15/2017 5:21 | 8.13  | 13.72 | 1.69  | 5.03 | 2.353 |
| 11/15/2017 5:22 | 9.34  | 13.67 | 1.85  | 4.99 | 2.357 |
| 11/15/2017 5:23 | 8.63  | 13.72 | 1.43  | 4.81 | 2.362 |
| 11/15/2017 5:24 | 8.86  | 13.31 | 2.38  | 5.02 | 2.323 |
| 11/15/2017 5:25 | 8.88  | 13.45 | 1.46  | 4.69 | 2.333 |
| 11/15/2017 5:26 | 9.15  | 12.87 | 1.61  | 5.02 | 2.331 |
| 11/15/2017 5:27 | 10.21 | 13.12 | 2.65  | 4.81 | 2.321 |
| 11/15/2017 5:28 | 10.12 | 12.77 | 2.85  | 4.75 | 2.320 |
| 11/15/2017 5:29 | 9.78  | 13.24 | 3.67  | 4.87 | 2.308 |
| 11/15/2017 5:30 | 9.61  | 13.88 | 6.22  | 5.43 | 2.297 |
| 11/15/2017 5:31 | 8.77  | 13.39 | 4.72  | 4.64 | 2.296 |
| 11/15/2017 5:32 | 9.40  | 12.21 | 13.09 | 6.63 | 2.274 |
| 11/15/2017 5:33 | 10.21 | 12.92 | 3.48  | 4.59 | 2.281 |
| 11/15/2017 5:34 | 9.54  | 13.42 | 4.23  | 4.16 | 2.279 |
| 11/15/2017 5:35 | 10.73 | 13.44 | 8.94  | 5.66 | 2.261 |
| 11/15/2017 5:36 | 10.59 | 13.44 | 0.58  | 3.32 | 2.271 |
| 11/15/2017 5:37 | 8.62  | 12.92 | 1.08  | 3.71 | 2.250 |
| 11/15/2017 5:38 | 10.23 | 13.75 | 1.25  | 3.57 | 2.244 |
| 11/15/2017 5:39 | 9.54  | 13.10 | 2.29  | 3.67 | 2.249 |
| 11/15/2017 5:40 | 10.85 | 13.19 | 12.98 | 6.01 | 2.254 |
| 11/15/2017 5:41 | 9.31  | 13.37 | 1.87  | 3.68 | 2.234 |

|                 |       |       |       |      |       |
|-----------------|-------|-------|-------|------|-------|
| 11/15/2017 5:42 | 8.89  | 12.75 | 1.88  | 3.77 | 2.221 |
| 11/15/2017 5:43 | 10.47 | 13.53 | 1.53  | 3.30 | 2.248 |
| 11/15/2017 5:44 | 10.05 | 13.04 | 3.97  | 3.52 | 2.247 |
| 11/15/2017 5:45 | 10.37 | 13.14 | 4.52  | 4.42 | 2.226 |
| 11/15/2017 5:46 | 9.37  | 12.71 | 15.31 | 7.13 | 2.222 |
| 11/15/2017 5:47 | 10.15 | 13.09 | 3.51  | 3.87 | 2.218 |
| 11/15/2017 5:48 | 10.48 | 13.21 | 1.31  | 2.63 | 2.220 |
| 11/15/2017 5:49 | 9.70  | 12.69 | 2.38  | 3.18 | 2.193 |
| 11/15/2017 5:50 | 9.95  | 13.68 | 3.43  | 2.63 | 2.188 |
| 11/15/2017 5:51 | 10.54 | 13.42 | 3.43  | 2.62 | 2.181 |
| 11/15/2017 5:52 | 8.08  | 12.28 | 2.99  | 2.48 | 2.174 |
| 11/15/2017 5:53 | 8.11  | 13.39 | 4.10  | 3.21 | 2.165 |
| 11/15/2017 5:54 | 10.38 | 13.14 | 2.34  | 2.15 | 2.160 |
| 11/15/2017 5:55 | 9.73  | 13.66 | 2.12  | 2.31 | 2.153 |
| 11/15/2017 5:56 | 11.05 | 13.74 | 1.77  | 2.10 | 2.160 |
| 11/15/2017 5:57 | 11.69 | 14.30 | 1.19  | 2.06 | 2.170 |
| 11/15/2017 5:58 | 9.22  | 13.58 | 1.86  | 2.02 | 2.159 |
| 11/15/2017 5:59 | 11.17 | 14.21 | 5.98  | 1.95 | 2.159 |
| 11/15/2017 6:00 | 10.96 | 13.72 | 5.33  | 3.44 | 2.149 |
| 11/15/2017 6:01 | 10.00 | 14.28 | 2.75  | 2.19 | 2.129 |
| 11/15/2017 6:02 | 10.23 | 14.39 | 2.98  | 1.71 | 2.127 |
| 11/15/2017 6:03 | 10.18 | 13.79 | 3.12  | 2.22 | 2.125 |
| 11/15/2017 6:04 | 10.76 | 13.82 | 2.54  | 1.85 | 2.132 |
| 11/15/2017 6:05 | 11.42 | 14.35 | 1.28  | 1.29 | 2.150 |
| 11/15/2017 6:06 | 12.52 | 14.06 | 4.49  | 1.77 | 2.156 |
| 11/15/2017 6:07 | 11.28 | 14.42 | 1.39  | 1.47 | 2.127 |
| 11/15/2017 6:08 | 11.13 | 14.75 | 2.29  | 1.40 | 2.120 |
| 11/15/2017 6:09 | 11.86 | 14.23 | 1.13  | 1.11 | 2.105 |
| 11/15/2017 6:10 | 11.07 | 14.77 | 1.44  | 1.04 | 2.124 |
| 11/15/2017 6:11 | 12.10 | 14.31 | 3.05  | 1.52 | 2.109 |
| 11/15/2017 6:12 | 11.93 | 15.13 | 4.95  | 1.53 | 2.106 |
| 11/15/2017 6:13 | 11.15 | 15.20 | 2.78  | 1.22 | 2.103 |
| 11/15/2017 6:14 | 11.58 | 15.37 | 2.17  | 1.00 | 2.072 |
| 11/15/2017 6:15 | 11.29 | 14.29 | 1.86  | 0.94 | 2.073 |
| 11/15/2017 6:16 | 11.83 | 14.96 | 1.34  | 0.96 | 2.089 |
| 11/15/2017 6:17 | 12.48 | 14.18 | 0.66  | 0.55 | 2.102 |
| 11/15/2017 6:18 | 9.98  | 14.81 | 1.69  | 1.05 | 2.073 |
| 11/15/2017 6:19 | 11.54 | 14.90 | 1.90  | 0.51 | 2.070 |
| 11/15/2017 6:20 | 13.16 | 15.19 | 1.60  | 0.49 | 2.072 |
| 11/15/2017 6:21 | 11.53 | 14.89 | 1.20  | 0.68 | 2.068 |
| 11/15/2017 6:22 | 12.53 | 14.78 | 0.85  | 0.46 | 2.077 |
| 11/15/2017 6:23 | 11.71 | 14.74 | 1.17  | 0.74 | 2.062 |
| 11/15/2017 6:24 | 10.17 | 14.71 | 4.50  | 0.96 | 2.069 |
| 11/15/2017 6:25 | 11.20 | 14.55 | 3.91  | 1.22 | 2.087 |
| 11/15/2017 6:26 | 13.08 | 14.91 | 4.06  | 1.18 | 2.066 |
| 11/15/2017 6:27 | 12.11 | 14.83 | 2.61  | 0.95 | 2.056 |
| 11/15/2017 6:28 | 12.62 | 15.14 | 1.69  | 0.67 | 2.061 |

|                 |       |       |      |      |       |
|-----------------|-------|-------|------|------|-------|
| 11/15/2017 6:29 | 12.73 | 15.42 | 2.01 | 1.02 | 2.066 |
| 11/15/2017 6:30 | 12.05 | 15.62 | 2.38 | 0.67 | 2.041 |
| 11/15/2017 6:31 | 10.73 | 15.41 | 2.42 | 0.72 | 2.031 |
| 11/15/2017 6:32 | 12.14 | 15.78 | 0.91 | 0.43 | 2.032 |
| 11/15/2017 6:33 | 13.24 | 15.67 | 1.61 | 0.78 | 2.051 |
| 11/15/2017 6:34 | 13.08 | 15.39 | 2.51 | 0.79 | 2.040 |
| 11/15/2017 6:35 | 10.19 | 14.90 | 1.89 | 0.97 | 2.032 |
| 11/15/2017 6:36 | 11.47 | 15.28 | 3.33 | 0.87 | 2.035 |
| 11/15/2017 6:37 | 10.99 | 15.40 | 2.59 | 0.79 | 2.021 |
| 11/15/2017 6:38 | 12.08 | 14.88 | 1.88 | 0.60 | 2.018 |
| 11/15/2017 6:39 | 12.01 | 14.84 | 1.45 | 0.66 | 2.010 |
| 11/15/2017 6:40 | 11.87 | 14.58 | 0.23 | 0.49 | 2.009 |
| 11/15/2017 6:41 | 11.76 | 14.53 | 0.51 | 0.48 | 2.011 |
| 11/15/2017 6:42 | 9.78  | 14.22 | 0.87 | 0.60 | 2.016 |
| 11/15/2017 6:43 | 12.17 | 13.86 | 0.78 | 0.51 | 2.032 |
| 11/15/2017 6:44 | 11.65 | 14.60 | 0.99 | 0.58 | 2.026 |
| 11/15/2017 6:45 | 11.23 | 15.07 | 0.42 | 0.58 | 2.029 |
| 11/15/2017 6:46 | 12.53 | 15.76 | 0.81 | 0.60 | 2.023 |
| 11/15/2017 6:47 | 12.92 | 15.27 | 0.79 | 0.46 | 2.011 |
| 11/15/2017 6:48 | 11.98 | 15.00 | 2.04 | 0.60 | 2.018 |
| 11/15/2017 6:49 | 12.86 | 15.56 | 3.57 | 0.91 | 2.027 |
| 11/15/2017 6:50 | 12.78 | 15.17 | 2.31 | 0.69 | 2.020 |
| 11/15/2017 6:51 | 13.26 | 15.34 | 1.69 | 0.68 | 2.000 |
| 11/15/2017 6:52 | 12.38 | 15.96 | 1.69 | 0.91 | 1.993 |
| 11/15/2017 6:53 | 14.68 | 15.87 | 2.20 | 0.65 | 1.994 |
| 11/15/2017 6:54 | 12.20 | 15.89 | 2.71 | 0.76 | 2.001 |
| 11/15/2017 6:55 | 14.14 | 15.61 | 1.20 | 0.33 | 1.987 |
| 11/15/2017 6:56 | 13.28 | 16.37 | 1.88 | 0.63 | 1.986 |
| 11/15/2017 6:57 | 12.09 | 15.23 | 1.18 | 0.31 | 1.991 |
| 11/15/2017 6:58 | 11.81 | 15.16 | 1.45 | 0.69 | 1.988 |
| 11/15/2017 6:59 | 13.14 | 16.01 | 1.29 | 0.72 | 1.985 |
| 11/15/2017 7:00 | 12.57 | 15.31 | 1.88 | 0.83 | 1.997 |
| 11/15/2017 7:01 | 12.09 | 15.32 | 3.61 | 1.06 | 1.978 |
| 11/15/2017 7:02 | 12.31 | 15.87 | 8.08 | 2.06 | 1.986 |
| 11/15/2017 7:03 | 14.29 | 16.71 | 2.39 | 0.90 | 1.976 |
| 11/15/2017 7:04 | 14.42 | 17.29 | 1.25 | 0.28 | 1.959 |
| 11/15/2017 7:05 | 14.10 | 17.33 | 0.03 | 0.33 | 1.959 |
| 11/15/2017 7:06 | 12.99 | 17.15 | 0.37 | 0.33 | 1.961 |
| 11/15/2017 7:07 | 13.48 | 17.44 | 0.72 | 0.27 | 1.962 |
| 11/15/2017 7:08 | 12.90 | 16.77 | 0.73 | 0.30 | 1.952 |
| 11/15/2017 7:09 | 14.67 | 17.05 | 1.11 | 0.75 | 1.966 |
| 11/15/2017 7:10 | 14.45 | 16.96 | 0.96 | 0.49 | 1.962 |
| 11/15/2017 7:11 | 13.93 | 16.57 | 2.54 | 0.60 | 1.969 |
| 11/15/2017 7:12 | 13.94 | 16.64 | 1.09 | 0.49 | 1.953 |
| 11/15/2017 7:13 | 14.08 | 16.98 | 0.59 | 0.33 | 1.945 |
| 11/15/2017 7:14 | 12.95 | 16.86 | 0.97 | 0.22 | 1.957 |
| 11/15/2017 7:15 | 13.08 | 17.07 | 0.76 | 0.37 | 1.957 |

|                 |       |       |       |       |       |
|-----------------|-------|-------|-------|-------|-------|
| 11/15/2017 7:16 | 15.64 | 17.07 | 0.38  | 0.06  | 1.952 |
| 11/15/2017 7:17 | 14.45 | 17.37 | 0.52  | 0.05  | 1.947 |
| 11/15/2017 7:18 | 11.77 | 17.25 | 0.62  | 0.19  | 1.948 |
| 11/15/2017 7:19 | 14.10 | 17.19 | 0.39  | 0.26  | 1.933 |
| 11/15/2017 7:20 | 12.92 | 17.12 | 0.17  | 0.12  | 1.917 |
| 11/15/2017 7:21 | 14.42 | 16.81 | 0.60  | 0.38  | 1.938 |
| 11/15/2017 7:22 | 13.29 | 16.45 | 0.33  | 0.09  | 1.947 |
| 11/15/2017 7:23 | 14.06 | 16.57 | -0.01 | 0.15  | 1.945 |
| 11/15/2017 7:24 | 13.52 | 16.87 | 0.57  | 0.37  | 1.951 |
| 11/15/2017 7:25 | 13.91 | 16.45 | 1.09  | 0.33  | 1.946 |
| 11/15/2017 7:26 | 13.41 | 16.17 | 1.12  | 0.38  | 1.949 |
| 11/15/2017 7:27 | 14.73 | 16.65 | 1.14  | 0.31  | 1.944 |
| 11/15/2017 7:28 | 12.94 | 16.81 | 0.89  | 0.40  | 1.947 |
| 11/15/2017 7:29 | 13.36 | 16.40 | 0.54  | 0.42  | 1.945 |
| 11/15/2017 7:30 | 13.93 | 17.05 | 0.38  | -0.03 | 1.925 |
| 11/15/2017 7:31 | 14.06 | 17.28 | 0.19  | 0.30  | 1.935 |
| 11/15/2017 7:32 | 12.93 | 16.70 | 0.24  | -0.03 | 1.947 |
| 11/15/2017 7:33 | 14.31 | 16.57 | 0.11  | 0.14  | 1.950 |
| 11/15/2017 7:34 | 14.35 | 16.54 | 0.67  | 0.07  | 1.951 |
| 11/15/2017 7:35 | 12.21 | 16.16 | 0.29  | 0.45  | 1.956 |
| 11/15/2017 7:36 | 12.75 | 15.92 | 0.31  | 0.49  | 1.970 |
| 11/15/2017 7:37 | 13.21 | 16.44 | 0.75  | 0.53  | 1.952 |
| 11/15/2017 7:38 | 14.56 | 16.99 | 0.51  | 0.27  | 1.930 |
| 11/15/2017 7:39 | 14.88 | 17.08 | -0.06 | -0.16 | 1.947 |
| 11/15/2017 7:40 | 15.61 | 17.35 | -0.17 | -0.17 | 1.936 |
| 11/15/2017 7:41 | 13.35 | 17.03 | -0.34 | 0.23  | 1.940 |
| 11/15/2017 7:42 | 13.23 | 16.68 | -0.27 | -0.04 | 1.953 |
| 11/15/2017 7:43 | 14.10 | 17.17 | 0.01  | 0.08  | 1.962 |
| 11/15/2017 7:44 | 14.53 | 16.90 | 0.31  | 0.28  | 1.972 |
| 11/15/2017 7:45 | 13.89 | 17.08 | 0.17  | 0.14  | 1.947 |
| 11/15/2017 7:46 | 13.73 | 17.14 | -0.05 | 0.30  | 1.954 |
| 11/15/2017 7:47 | 12.53 | 16.28 | -0.36 | 0.14  | 1.943 |
| 11/15/2017 7:48 | 12.79 | 16.33 | -0.27 | -0.17 | 1.953 |
| 11/15/2017 7:49 | 13.88 | 16.54 | -0.02 | 0.32  | 1.960 |
| 11/15/2017 7:50 | 13.50 | 16.53 | -0.11 | 0.33  | 1.962 |
| 11/15/2017 7:51 | 13.48 | 16.63 | -0.33 | -0.01 | 1.955 |
| 11/15/2017 7:52 | 12.08 | 16.07 | -0.32 | 0.33  | 1.957 |
| 11/15/2017 7:53 | 13.01 | 15.68 | -0.32 | 0.32  | 1.966 |
| 11/15/2017 7:54 | 13.62 | 15.74 | 0.24  | 0.18  | 1.987 |
| 11/15/2017 7:55 | 12.45 | 16.02 | 1.31  | 0.20  | 1.976 |
| 11/15/2017 7:56 | 13.23 | 16.06 | 0.92  | 0.28  | 1.982 |
| 11/15/2017 7:57 | 12.27 | 16.39 | 0.29  | 0.11  | 1.986 |
| 11/15/2017 7:58 | 12.56 | 15.46 | 0.81  | 0.19  | 1.987 |
| 11/15/2017 7:59 | 13.68 | 15.73 | 0.68  | 0.49  | 2.001 |
| 11/15/2017 8:00 | 13.13 | 16.13 | 0.58  | 0.21  | 2.003 |
| 11/15/2017 8:01 | 12.13 | 15.54 | 0.99  | 0.41  | 1.991 |
| 11/15/2017 8:02 | 12.41 | 15.97 | 0.99  | 0.10  | 1.974 |

|                 |       |       |       |       |       |       |
|-----------------|-------|-------|-------|-------|-------|-------|
| 11/15/2017 8:03 |       | 13.19 | 16.44 | 1.21  | 0.21  | 1.975 |
| 11/15/2017 8:04 |       | 14.12 | 16.85 | 0.89  | 0.09  | 1.995 |
| 11/15/2017 8:05 |       | 15.25 | 17.52 | 0.04  | 0.00  | 2.006 |
| 11/15/2017 8:06 |       | 15.01 | 17.17 | 0.64  | 0.27  | 2.013 |
| 11/15/2017 8:07 |       | 14.44 | 17.30 | 1.05  | 0.20  | 2.016 |
| 11/15/2017 8:08 |       | 13.80 | 17.67 | 0.56  | 0.22  | 2.009 |
| 11/15/2017 8:09 |       | 15.12 | 17.41 | -0.08 | 0.06  | 2.014 |
| 11/15/2017 8:10 |       | 14.60 | 17.33 | -0.16 | -0.02 | 2.018 |
| 11/15/2017 8:11 |       | 14.84 | 17.29 | 0.90  | 0.14  | 2.017 |
| 11/15/2017 8:12 |       | 14.68 | 17.27 | 0.41  | -0.05 | 2.013 |
| 11/15/2017 8:13 |       | 13.20 | 17.36 | 0.39  | 0.20  | 2.025 |
| 11/15/2017 8:14 |       | 13.86 | 17.04 | -0.02 | 0.28  | 2.019 |
| 11/15/2017 8:15 |       | 13.82 | 17.39 | 0.69  | 0.19  | 2.031 |
| 11/15/2017 8:16 |       | 14.93 | 17.30 | 0.89  | 0.19  | 2.028 |
| 11/15/2017 8:17 |       | 15.04 | 17.85 | 1.09  | 0.17  | 2.036 |
| 11/15/2017 8:18 |       | 14.94 | 18.31 | -0.29 | 0.07  | 2.033 |
| 11/15/2017 8:19 |       | 15.89 | 17.82 | -0.32 | 0.08  | 2.033 |
| 11/15/2017 8:20 |       | 15.98 | 18.23 | -0.24 | -0.18 | 2.042 |
| 11/15/2017 8:21 |       | 16.14 | 18.77 | -0.23 | -0.06 | 2.046 |
| 11/15/2017 8:22 |       | 15.10 | 19.08 | -0.24 | 0.13  | 2.019 |
| 11/15/2017 8:23 |       | 16.80 | 19.40 | -0.13 | 0.10  | 2.013 |
| 11/15/2017 8:24 |       | 16.13 | 19.17 | -0.24 | 0.04  | 2.022 |
| 11/15/2017 8:25 |       | 16.42 | 19.80 | -0.30 | -0.01 | 2.015 |
| 11/15/2017 8:26 |       | 18.00 | 19.53 | -0.23 | 0.23  | 2.015 |
| 11/15/2017 8:27 |       | 16.40 | 19.19 | -0.25 | 0.03  | 2.032 |
| 11/15/2017 8:28 |       | 16.24 | 19.22 | -0.12 | 0.05  | 2.038 |
| 11/15/2017 8:29 |       | 16.24 | 19.58 | -0.21 | 0.15  | 2.036 |
| 11/15/2017 8:30 |       | 16.74 | 19.84 | -0.04 | 0.03  | 2.043 |
| 11/15/2017 8:31 |       | 17.65 | 19.93 | -0.21 | 0.19  | 2.045 |
| 11/15/2017 8:32 |       | 17.89 | 20.36 | 0.00  | -0.09 | 2.019 |
| 11/15/2017 8:33 |       | 17.96 | 20.26 | 0.02  | 0.04  | 2.012 |
| 11/15/2017 8:34 | -1.30 | 17.20 | 20.49 | -0.27 | 0.03  | 1.942 |
| 11/15/2017 8:35 | -1.02 | 15.87 | 20.62 | -0.21 | 0.01  | 1.871 |
| 11/15/2017 8:36 | -0.95 | 18.23 | 20.69 | -0.08 | 0.05  | 1.842 |
| 11/15/2017 8:37 | -1.22 | 18.51 | 20.49 | -0.22 | 0.02  | 1.813 |
| 11/15/2017 8:38 | -1.47 | 16.99 | 20.72 | -0.34 | -0.02 | 1.783 |
| 11/15/2017 8:39 | -1.55 | 16.75 | 21.03 | -0.16 | 0.10  | 1.761 |
| 11/15/2017 8:40 | -1.60 | 17.10 | 20.48 | 1.93  | 0.94  | 1.761 |
| 11/15/2017 8:41 | -1.60 | 17.33 | 20.75 | 4.79  | 1.24  | 1.778 |
| 11/15/2017 8:42 | -1.60 | 17.45 | 20.99 | 1.32  | 0.90  | 1.739 |
| 11/15/2017 8:43 |       | 17.79 | 20.70 | 4.69  | 0.44  | 1.752 |
| 11/15/2017 8:44 | -1.38 | 17.48 | 21.31 | 5.79  | 0.96  | 1.723 |
| 11/15/2017 8:45 | -1.12 | 17.18 | 21.17 | 0.28  | 0.54  | 1.686 |
| 11/15/2017 8:46 | -1.10 | 17.23 | 20.93 | 0.00  | 0.41  | 1.681 |
| 11/15/2017 8:47 |       | 17.75 | 21.11 | 0.87  | 0.73  | 1.639 |
| 11/15/2017 8:48 |       | 17.53 | 21.01 | 3.89  | 1.00  | 1.600 |
| 11/15/2017 8:49 | -1.60 | 18.15 | 20.70 | 0.84  | 0.48  | 1.586 |

|                 |       |        |       |       |       |       |
|-----------------|-------|--------|-------|-------|-------|-------|
| 11/15/2017 8:50 | -1.40 | 19.28  | 20.93 | 2.69  | 0.61  | 1.585 |
| 11/15/2017 8:51 | -1.30 | -19.77 | 21.87 | 2.64  | 0.59  | 1.562 |
| 11/15/2017 8:52 | -1.37 | 18.88  | 21.66 | 1.35  | 0.44  | 1.552 |
| 11/15/2017 8:53 |       | 17.08  | 21.30 | 1.56  | 0.52  | 1.569 |
| 11/15/2017 8:54 | -1.80 | 17.54  | 20.84 | 1.64  | 0.93  | 1.566 |
| 11/15/2017 8:55 | -1.80 | 17.53  | 21.49 | 1.61  | 0.41  | 1.542 |
| 11/15/2017 8:56 |       | 18.50  | 21.14 | 0.08  | 0.42  | 1.535 |
| 11/15/2017 8:57 | -1.58 | 18.62  | 21.56 | 0.81  | 0.65  | 1.533 |
| 11/15/2017 8:58 | -1.62 | 17.49  | 21.94 | 0.83  | 0.73  | 1.537 |
| 11/15/2017 8:59 | -1.77 | 18.78  | 22.11 | 1.67  | 1.20  | 1.533 |
| 11/15/2017 9:00 | -2.00 | 19.26  | 22.13 | 3.05  | 0.73  | 1.518 |
| 11/15/2017 9:01 | -2.25 | 18.05  | 22.47 | 2.49  | 0.92  | 1.545 |
| 11/15/2017 9:02 | -2.38 | 19.73  | 23.21 | 2.61  | 0.96  | 1.545 |
| 11/15/2017 9:03 | -2.40 | 20.27  | 23.63 | 1.72  | 0.56  | 1.537 |
| 11/15/2017 9:04 | -2.40 | 20.13  | 23.44 | 0.33  | 0.61  | 1.517 |
| 11/15/2017 9:05 |       | 20.58  | 23.59 | -0.08 | 0.12  | 1.499 |
| 11/15/2017 9:06 |       | 20.64  | 23.69 | 1.63  | 0.84  | 1.504 |
| 11/15/2017 9:07 |       | 20.58  | 23.58 | 0.22  | 0.24  | 1.481 |
| 11/15/2017 9:08 |       | 19.31  | 23.48 | 0.52  | 0.54  | 1.485 |
| 11/15/2017 9:09 |       | 18.89  | 22.16 | 3.56  | 0.47  | 1.465 |
| 11/15/2017 9:10 |       | 18.76  | 22.00 | 7.45  | 11.49 | 1.456 |
| 11/15/2017 9:11 |       | 20.99  | 23.26 | 0.39  | 0.91  | 1.433 |
| 11/15/2017 9:12 |       | 20.87  | 24.18 | 0.12  | 0.28  | 1.435 |
| 11/15/2017 9:13 |       | 19.85  | 24.07 | 0.18  | 0.42  | 1.436 |
| 11/15/2017 9:14 |       | 20.95  | 23.63 | 0.39  | 0.59  | 1.431 |
| 11/15/2017 9:15 |       | 20.75  | 24.12 | 0.03  | 0.00  | 1.421 |
| 11/15/2017 9:16 |       | 20.67  | 24.18 | -0.16 | 0.10  | 1.413 |
| 11/15/2017 9:17 |       | 20.41  | 23.76 | -0.26 | 0.14  | 1.411 |
| 11/15/2017 9:18 |       | 20.68  | 24.32 | -0.21 | 0.23  | 1.401 |
| 11/15/2017 9:19 |       | 20.73  | 23.26 | -0.15 | 0.21  | 1.405 |
| 11/15/2017 9:20 |       | 21.22  | 23.60 | -0.15 | 0.12  | 1.403 |
| 11/15/2017 9:21 |       | 19.22  | 23.25 | -0.11 | 0.26  | 1.403 |
| 11/15/2017 9:22 |       | 21.47  | 24.27 | -0.05 | 0.35  | 1.406 |
| 11/15/2017 9:23 |       | 20.42  | 24.37 | 0.12  | 0.34  | 1.403 |
| 11/15/2017 9:24 |       | 20.94  | 23.97 | 0.22  | 0.33  | 1.400 |
| 11/15/2017 9:25 |       | 20.12  | 23.70 | -0.03 | 0.12  | 1.387 |
| 11/15/2017 9:26 |       | 19.02  | 23.51 | -0.07 | 0.32  | 1.384 |
| 11/15/2017 9:27 |       | 21.24  | 24.40 | -0.10 | 0.00  | 1.390 |
| 11/15/2017 9:28 |       | 20.38  | 23.96 | -0.08 | -0.03 | 1.392 |
| 11/15/2017 9:29 |       | 21.33  | 24.40 | -0.11 | -0.12 | 1.387 |
| 11/15/2017 9:30 |       | 20.48  | 24.62 | -0.11 | 0.06  | 1.384 |
| 11/15/2017 9:31 |       | 22.00  | 24.80 | -0.14 | -0.06 | 1.389 |
| 11/15/2017 9:32 |       | 23.45  | 25.03 | -0.08 | -0.08 | 1.387 |
| 11/15/2017 9:33 |       | 21.32  | 25.09 | -0.01 | -0.25 | 1.375 |
| 11/15/2017 9:34 |       | 22.51  | 25.00 | -0.14 | -0.16 | 1.370 |
| 11/15/2017 9:35 |       | 23.06  | 25.09 | -0.17 | -0.10 | 1.369 |
| 11/15/2017 9:36 |       | 20.33  | 24.35 | -0.09 | -0.18 | 1.364 |

|                  |       |       |       |       |       |
|------------------|-------|-------|-------|-------|-------|
| 11/15/2017 9:37  | 20.55 | 24.40 | -0.15 | -0.13 | 1.384 |
| 11/15/2017 9:38  | 20.46 | 24.39 | -0.19 | -0.21 | 1.379 |
| 11/15/2017 9:39  | 22.03 | 24.39 | -0.15 | -0.15 | 1.381 |
| 11/15/2017 9:40  | 23.29 | 25.32 | -0.15 | -0.25 | 1.382 |
| 11/15/2017 9:41  | 23.25 | 25.67 | -0.17 | -0.29 | 1.388 |
| 11/15/2017 9:42  | 21.08 | 25.20 | -0.16 | -0.21 | 1.394 |
| 11/15/2017 9:43  | 23.11 | 25.30 | -0.11 | -0.14 | 1.389 |
| 11/15/2017 9:44  | 20.07 | 25.03 | -0.09 | -0.31 | 1.376 |
| 11/15/2017 9:45  | 21.43 | 24.13 | -0.04 | -0.22 | 1.371 |
| 11/15/2017 9:46  | 21.70 | 23.58 | -0.09 | -0.42 | 1.319 |
| 11/15/2017 9:47  | 22.17 | 23.68 | -0.12 | -0.44 | 1.319 |
| 11/15/2017 9:48  | 21.36 | 23.95 | -0.11 | -0.16 | 1.373 |
| 11/15/2017 9:49  | 21.73 | 24.31 | -0.14 | -0.48 | 1.370 |
| 11/15/2017 9:50  | 21.78 | 25.19 | -0.16 | -0.18 | 1.364 |
| 11/15/2017 9:51  | 22.31 | 24.54 | -0.18 | -0.34 | 1.347 |
| 11/15/2017 9:52  | 22.87 | 24.86 | -0.22 | -0.70 | 1.364 |
| 11/15/2017 9:53  | 22.24 | 25.35 | -0.20 | -0.26 | 1.363 |
| 11/15/2017 9:54  | 22.68 | 24.84 | -0.20 | -0.13 | 1.361 |
| 11/15/2017 9:55  | 21.18 | 24.74 | -0.20 | 0.33  | 1.377 |
| 11/15/2017 9:56  | 21.78 | 24.89 | -0.16 | 0.66  | 1.370 |
| 11/15/2017 9:57  | 21.75 | 25.00 | 0.01  | -0.34 | 1.357 |
| 11/15/2017 9:58  | 21.60 | 25.36 | -0.08 | -0.60 | 1.354 |
| 11/15/2017 9:59  | 21.11 | 25.30 | -0.15 | -0.56 | 1.349 |
| 11/15/2017 10:00 | 22.08 | 24.96 | -0.11 | -0.67 | 1.353 |
| 11/15/2017 10:01 | 23.28 | 25.42 | -0.10 | -0.54 | 1.371 |
| 11/15/2017 10:02 | 22.81 | 25.51 | -0.10 | -0.54 | 1.385 |
| 11/15/2017 10:03 | 23.93 | 25.52 | -0.11 | -0.74 | 1.373 |
| 11/15/2017 10:04 | 23.79 | 26.22 | -0.14 | -0.63 | 1.372 |
| 11/15/2017 10:05 | 22.74 | 26.30 | -0.14 | -0.61 | 1.369 |
| 11/15/2017 10:06 | 21.81 | 25.66 | -0.16 | -0.56 | 1.363 |
| 11/15/2017 10:07 | 21.05 | 25.20 | 0.02  | -0.31 | 1.363 |
| 11/15/2017 10:08 | 24.95 | 26.06 | 0.00  | -0.59 | 1.355 |
| 11/15/2017 10:09 | 22.64 | 26.43 | -0.12 | -0.72 | 1.340 |
| 11/15/2017 10:10 | 23.54 | 25.84 | -0.12 | -0.77 | 1.351 |
| 11/15/2017 10:11 | 26.05 | 27.24 | -0.22 | -0.84 | 1.360 |
| 11/15/2017 10:12 | 24.79 | 28.43 | -0.19 | -0.77 | 1.347 |
| 11/15/2017 10:13 | 23.85 | 27.26 | -0.15 | -0.69 | 1.344 |
| 11/15/2017 10:14 | 24.88 | 26.74 | -0.13 | -0.71 | 1.344 |
| 11/15/2017 10:15 | 23.19 | 26.18 | 0.04  | -0.40 | 1.337 |
| 11/15/2017 10:16 | 21.74 | 25.47 | 0.68  | 0.26  | 1.332 |
| 11/15/2017 10:17 | 22.34 | 26.11 | 1.38  | 0.91  | 1.341 |
| 11/15/2017 10:18 | 24.86 | 25.80 | 0.14  | -0.44 | 1.337 |
| 11/15/2017 10:19 | 22.99 | 25.64 | -0.11 | -0.95 | 1.310 |
| 11/15/2017 10:20 | 23.14 | 26.51 | -0.16 | -0.68 | 1.320 |
| 11/15/2017 10:21 | 23.76 | 26.26 | -0.17 | -0.78 | 1.343 |
| 11/15/2017 10:22 | 23.27 | 26.56 | -0.27 | -0.63 | 1.344 |
| 11/15/2017 10:23 | 25.47 | 25.89 | 0.23  | -0.03 | 1.342 |

|                  |       |       |       |       |       |
|------------------|-------|-------|-------|-------|-------|
| 11/15/2017 10:24 | 24.92 | 27.19 | 1.29  | 0.44  | 1.370 |
| 11/15/2017 10:25 | 24.50 | 27.92 | 1.18  | -0.21 | 1.376 |
| 11/15/2017 10:26 | 26.92 | 28.04 | 0.49  | -0.59 | 1.370 |
| 11/15/2017 10:27 | 25.16 | 28.08 | -0.01 | -0.64 | 1.368 |
| 11/15/2017 10:28 | 24.20 | 26.85 | 0.64  | 0.99  | 1.377 |
| 11/15/2017 10:29 | 24.10 | 26.48 | 1.36  | 0.46  | 1.394 |
| 11/15/2017 10:30 | 24.87 | 27.42 | 0.60  | -0.45 | 1.381 |
| 11/15/2017 10:31 | 25.08 | 27.29 | -0.04 | -0.51 | 1.372 |
| 11/15/2017 10:32 | 26.23 | 27.90 | -0.14 | -0.51 | 1.372 |
| 11/15/2017 10:33 | 24.28 | 27.37 | -0.05 | -0.61 | 1.382 |
| 11/15/2017 10:34 | 24.04 | 26.39 | 0.31  | 0.25  | 1.388 |
| 11/15/2017 10:35 | 26.18 | 27.78 | 0.01  | -0.76 | 1.391 |
| 11/15/2017 10:36 | 25.42 | 27.93 | -0.35 | -0.72 | 1.391 |
| 11/15/2017 10:37 | 26.11 | 28.79 | -0.42 | -0.76 | 1.395 |
| 11/15/2017 10:38 | 25.98 | 29.15 | -0.39 | -1.04 | 1.423 |
| 11/15/2017 10:39 | 25.11 | 28.64 | -0.40 | -1.17 | 1.436 |
| 11/15/2017 10:40 | 27.03 | 28.32 | -0.43 | -0.90 | 1.445 |
| 11/15/2017 10:41 | 27.29 | 28.53 | -0.45 | -1.02 | 1.452 |
| 11/15/2017 10:42 | 26.62 | 28.90 | -0.49 | -1.14 | 1.464 |
| 11/15/2017 10:43 | 25.32 | 28.79 | -0.45 | -1.08 | 1.447 |
| 11/15/2017 10:44 | 25.38 | 28.36 | -0.47 | -1.12 | 1.487 |
| 11/15/2017 10:45 | 26.45 | 28.68 | -0.52 | -1.30 | 1.493 |
| 11/15/2017 10:46 | 24.84 | 28.56 | -0.52 | -1.11 | 1.512 |
| 11/15/2017 10:47 | 24.78 | 28.50 | -0.42 | -0.04 | 1.518 |
| 11/15/2017 10:48 | 25.12 | 27.93 | -0.15 | -0.44 | 1.521 |
| 11/15/2017 10:49 | 26.68 | 28.69 | -0.55 | -1.35 | 1.524 |
| 11/15/2017 10:50 | 26.78 | 28.98 | -0.51 | -1.17 | 1.531 |
| 11/15/2017 10:51 | 26.28 | 28.85 | -0.56 | -1.11 | 1.524 |
| 11/15/2017 10:52 | 26.48 | 29.13 | -0.52 | -0.99 | 1.535 |
| 11/15/2017 10:53 | 25.88 | 29.17 | -0.54 | -1.16 | 1.552 |
| 11/15/2017 10:54 | 26.71 | 29.37 | -0.52 | -1.02 | 1.558 |
| 11/15/2017 10:55 | 24.83 | 29.44 | -0.54 | -1.01 | 1.566 |
| 11/15/2017 10:56 | 26.12 | 28.85 | -0.54 | -1.16 | 1.578 |
| 11/15/2017 10:57 | 25.38 | 29.04 | -0.54 | -1.03 | 1.557 |
| 11/15/2017 10:58 | 25.69 | 28.55 | -0.47 | -1.16 | 1.565 |
| 11/15/2017 10:59 | 25.73 | 28.21 | -0.45 | -0.91 | 1.591 |
| 11/15/2017 11:00 | 24.88 | 28.51 | -0.52 | -0.93 | 1.597 |
| 11/15/2017 11:01 | 27.07 | 29.19 | -0.55 | -1.14 | 1.610 |
| 11/15/2017 11:02 | 26.28 | 29.41 | -0.31 | -0.83 | 1.617 |
| 11/15/2017 11:03 | 25.90 | 29.43 | -0.38 | -1.25 | 1.607 |
| 11/15/2017 11:04 | 26.78 | 29.34 | -0.45 | -1.02 | 1.609 |
| 11/15/2017 11:05 | 27.61 | 29.41 | -0.40 | -1.06 | 1.626 |
| 11/15/2017 11:06 | 27.68 | 30.01 | -0.49 | -1.08 | 1.618 |
| 11/15/2017 11:07 | 26.53 | 30.19 | -0.53 | -0.93 | 1.625 |
| 11/15/2017 11:08 | 27.47 | 30.23 | -0.52 | -1.05 | 1.631 |
| 11/15/2017 11:09 | 28.54 | 29.88 | -0.43 | -0.82 | 1.640 |
| 11/15/2017 11:10 | 26.66 | 29.79 | -0.47 | -0.87 | 1.633 |



|                  |       |       |       |       |       |
|------------------|-------|-------|-------|-------|-------|
| 11/15/2017 11:11 | 27.05 | 29.54 | -0.33 | -0.65 | 1.659 |
| 11/15/2017 11:12 | 28.68 | 30.82 | -0.38 | -0.87 | 1.659 |
| 11/15/2017 11:13 | 27.23 | 30.90 | -0.50 | -0.92 | 1.680 |
| 11/15/2017 11:14 | 26.36 | 30.28 | -0.24 | -0.68 | 1.716 |
| 11/15/2017 11:15 | 28.26 | 30.55 | -0.18 | -0.60 | 1.705 |
| 11/15/2017 11:16 | 29.52 | 31.18 | -0.48 | -0.97 | 1.706 |
| 11/15/2017 11:17 | 28.28 | 31.09 | -0.28 | -0.52 | 1.722 |
| 11/15/2017 11:18 | 28.03 | 31.00 | -0.42 | -0.81 | 1.737 |
| 11/15/2017 11:19 | 28.23 | 30.69 | -0.10 | -0.66 | 1.725 |
| 11/15/2017 11:20 | 27.95 | 30.57 | -0.13 | -0.53 | 1.728 |
| 11/15/2017 11:21 | 26.66 | 30.36 | -0.36 | -0.87 | 1.747 |
| 11/15/2017 11:22 | 27.78 | 29.40 | -0.21 | -0.72 | 1.759 |
| 11/15/2017 11:23 | 26.27 | 29.19 | -0.03 | -0.44 | 1.760 |
| 11/15/2017 11:24 | 26.87 | 28.90 | 0.03  | -0.70 | 1.765 |
| 11/15/2017 11:25 | 24.37 | 28.80 | 0.09  | -0.43 | 1.774 |
| 11/15/2017 11:26 | 23.53 | 24.50 | 5.53  | 15.43 | 1.787 |
| 11/15/2017 11:27 | 26.45 | 27.46 | 4.16  | 4.33  | 1.791 |
| 11/15/2017 11:28 | 25.88 | 27.96 | 3.90  | 3.61  | 1.795 |
| 11/15/2017 11:29 | 29.79 | 31.37 | 0.38  | -0.54 | 1.778 |
| 11/15/2017 11:30 | 30.15 | 32.06 | -0.45 | -1.19 | 1.786 |
| 11/15/2017 11:31 | 29.07 | 31.11 | -0.09 | 1.23  | 1.803 |
| 11/15/2017 11:32 | 27.80 | 31.06 | -0.23 | -0.54 | 1.808 |
| 11/15/2017 11:33 | 27.38 | 30.96 | -0.21 | -0.63 | 1.803 |
| 11/15/2017 11:34 | 29.08 | 31.37 | -0.55 | -0.66 | 1.836 |
| 11/15/2017 11:35 | 29.06 | 31.39 | -0.48 | -0.43 | 1.836 |
| 11/15/2017 11:36 | 29.35 | 31.87 | 0.14  | -0.31 | 1.838 |
| 11/15/2017 11:37 | 29.10 | 32.30 | -0.23 | -0.66 | 1.861 |
| 11/15/2017 11:38 | 28.93 | 32.57 | -0.44 | -0.68 | 1.863 |
| 11/15/2017 11:39 | 29.86 | 31.48 | 2.50  | 5.87  | 2.050 |
| 11/15/2017 11:40 | 28.88 | 31.74 | 1.37  | 2.78  | 2.045 |
| 11/15/2017 11:41 | 30.37 | 31.85 | -0.11 | 0.01  | 1.931 |
| 11/15/2017 11:42 | 28.29 | 29.47 | -0.42 | -0.83 | 1.903 |
| 11/15/2017 11:43 | 12.51 | 14.63 | 2.49  | 4.10  | 1.994 |
| 11/15/2017 11:44 | 26.29 | 26.16 | 1.34  | -0.23 | 1.923 |
| 11/15/2017 11:45 | 23.92 | 27.62 | -0.02 | -0.64 | 2.046 |
| 11/15/2017 11:46 | 27.43 | 28.14 | -0.49 | -0.56 | 5.495 |
| 11/15/2017 11:47 | 26.37 | 27.45 | -0.47 | -0.88 | 2.866 |
| 11/15/2017 11:48 | 28.83 | 30.67 | -0.69 | -0.91 | 2.339 |
| 11/15/2017 11:49 | 28.62 | 30.89 | -0.77 | -0.83 | 1.923 |
| 11/15/2017 11:50 | 24.78 | 30.07 | -0.80 | -0.67 | 1.908 |
| 11/15/2017 11:51 | 31.26 | 32.05 | 0.12  | 0.50  | 2.455 |
| 11/15/2017 11:52 | 29.40 | 32.62 | 2.92  | 2.62  | 2.757 |
| 11/15/2017 11:53 | 31.18 | 32.52 | 0.62  | 0.17  | 2.052 |
| 11/15/2017 11:54 | 31.77 | 33.49 | 1.65  | 1.23  | 2.153 |
| 11/15/2017 11:55 | 29.99 | 33.76 | 1.79  | 1.20  | 2.349 |
| 11/15/2017 11:56 | 30.51 | 33.12 | 2.64  | 1.27  | 2.580 |
| 11/15/2017 11:57 | 29.98 | 32.77 | 2.61  | 0.00  | 5.080 |

|                  |        |         |        |         |       |
|------------------|--------|---------|--------|---------|-------|
| 11/15/2017 11:58 | 32.44  | 32.81   | 2.31   | -0.69   | 6.012 |
| 11/15/2017 11:59 | 30.83  | 33.52   | -0.28  | -0.62   | 3.980 |
| 11/15/2017 12:00 | 31.20  | 34.31   | 2.76   | 2.27    | 2.662 |
| 11/15/2017 12:01 | 34.00  | 34.74   | 0.95   | -0.26   | 3.550 |
| 11/15/2017 12:02 | 34.03  | 34.77   | -0.65  | -0.74   | 5.661 |
| 11/15/2017 12:03 | 31.76  | 35.65   | -0.66  | -0.50   | 2.653 |
| 11/15/2017 12:04 | 31.71  | 34.83   | -0.47  | -0.45   | 2.143 |
| 11/15/2017 12:05 | 34.12  | 36.23   | 1.15   | 0.87    | 2.096 |
| 11/15/2017 12:06 | 33.38  | 35.67   | 2.27   | 0.96    | 2.651 |
| 11/15/2017 12:07 | 32.68  | 36.00   | 2.32   | 1.29    | 4.557 |
| 11/15/2017 12:08 | 32.73  | 34.43   | 4.90   | 4.07    | 4.227 |
| 11/15/2017 12:09 | 32.63  | 34.64   | 4.94   | 2.83    | 3.069 |
| 11/15/2017 12:10 | 31.90  | 33.48   | 1.16   | -0.12   | 2.471 |
| 11/15/2017 12:11 | 35.09  | 68.90   | 46.77  | 24.34   | 3.300 |
| 11/15/2017 12:12 | 35.93  | 161.23  | 138.45 | 294.63  | 3.386 |
| 11/15/2017 12:13 | 27.20  | 58.70   | 35.79  | 46.54   | 2.529 |
| 11/15/2017 12:14 | 27.94  | 65.28   | 29.20  | 33.08   | 2.257 |
| 11/15/2017 12:15 | 27.93  | 33.05   | 4.74   | 2.84    | 2.004 |
| 11/15/2017 12:16 | 29.74  | 31.99   | 3.69   | 3.20    | 1.928 |
| 11/15/2017 12:17 | 46.68  | 164.39  | 148.17 | 131.70  | 2.413 |
| 11/15/2017 12:18 | 173.58 | 1081.30 | 946.39 | 1503.08 | 8.539 |
| 11/15/2017 12:19 | 159.55 | 937.70  | 703.31 | 1155.68 | 9.685 |
| 11/15/2017 12:20 | 87.67  | 563.30  | 457.18 | 814.38  | 8.016 |
| 11/15/2017 12:21 | 42.70  | 259.22  | 266.25 | 507.38  | 4.741 |
| 11/15/2017 12:22 | 42.47  | 239.12  | 280.81 | 533.68  | 4.178 |
| 11/15/2017 12:23 | 34.80  | 195.78  | 256.71 | 540.82  | 4.069 |
| 11/15/2017 12:24 | 40.09  | 217.80  | 277.74 | 635.66  | 4.113 |
| 11/15/2017 12:25 | 38.76  | 239.52  | 337.52 | 520.72  | 4.061 |
| 11/15/2017 12:26 | 65.68  | 329.02  | 296.38 | 421.68  | 4.514 |
| 11/15/2017 12:27 | 83.26  | 468.93  | 465.01 | 679.45  | 5.929 |
| 11/15/2017 12:28 | 63.72  | 361.52  | 257.40 | 387.57  | 5.432 |
| 11/15/2017 12:29 | 37.54  | 224.03  | 204.37 | 349.21  | 4.351 |
| 11/15/2017 12:30 | 38.72  | 200.08  | 211.95 | 358.14  | 3.596 |
| 11/15/2017 12:31 | 52.02  | 268.30  | 324.37 | 656.68  | 4.405 |
| 11/15/2017 12:32 | 44.86  | 248.18  | 303.65 | 666.15  | 4.561 |
| 11/15/2017 12:33 | 35.26  | 188.00  | 256.92 | 549.50  | 4.083 |
| 11/15/2017 12:34 | 43.34  | 238.05  | 270.46 | 515.05  | 4.129 |
| 11/15/2017 12:35 | 37.98  | 210.38  | 305.17 | 636.49  | 4.031 |
| 11/15/2017 12:36 | 43.83  | 219.25  | 325.60 | 713.13  | 3.938 |
| 11/15/2017 12:37 | 51.42  | 257.97  | 390.67 | 810.39  | 5.104 |
| 11/15/2017 12:38 | 57.67  | 285.95  | 366.76 | 711.43  | 4.567 |
| 11/15/2017 12:39 | 51.43  | 266.83  | 404.55 | 822.54  | 4.808 |
| 11/15/2017 12:40 | 46.33  | 233.97  | 368.21 | 855.13  | 4.697 |
| 11/15/2017 12:41 | 29.79  | 161.35  | 289.58 | 587.07  | 3.867 |
| 11/15/2017 12:42 | 40.76  | 198.70  | 337.68 | 762.63  | 3.861 |
| 11/15/2017 12:43 | 32.63  | 172.48  | 281.74 | 676.61  | 3.971 |
| 11/15/2017 12:44 | 32.35  | 164.48  | 248.99 | 565.46  | 3.757 |

|                  |        |        |        |         |       |
|------------------|--------|--------|--------|---------|-------|
| 11/15/2017 12:45 | 27.54  | 146.77 | 227.15 | 467.28  | 3.537 |
| 11/15/2017 12:46 | 35.67  | 176.27 | 276.46 | 632.24  | 3.606 |
| 11/15/2017 12:47 | 35.51  | 183.53 | 266.87 | 558.75  | 3.817 |
| 11/15/2017 12:48 | 31.50  | 160.87 | 230.34 | 527.58  | 3.985 |
| 11/15/2017 12:49 | 33.73  | 171.88 | 235.22 | 410.25  | 3.752 |
| 11/15/2017 12:50 | 29.69  | 150.80 | 226.12 | 456.29  | 3.623 |
| 11/15/2017 12:51 | 29.04  | 139.73 | 218.26 | 421.34  | 3.531 |
| 11/15/2017 12:52 | 26.72  | 136.40 | 193.93 | 394.88  | 3.482 |
| 11/15/2017 12:53 | 37.40  | 162.95 | 235.57 | 485.99  | 3.615 |
| 11/15/2017 12:54 | 56.07  | 296.08 | 353.49 | 766.19  | 4.483 |
| 11/15/2017 12:55 | 54.83  | 301.32 | 336.89 | 806.60  | 4.986 |
| 11/15/2017 12:56 | 37.61  | 169.87 | 272.64 | 490.52  | 4.140 |
| 11/15/2017 12:57 | 61.33  | 294.55 | 413.73 | 828.43  | 4.873 |
| 11/15/2017 12:58 | 40.51  | 189.75 | 409.96 | 690.41  | 4.285 |
| 11/15/2017 12:59 | 50.72  | 257.27 | 406.39 | 714.33  | 4.550 |
| 11/15/2017 13:00 | 49.69  | 239.78 | 326.45 | 641.16  | 4.522 |
| 11/15/2017 13:01 | 39.37  | 212.35 | 306.98 | 634.96  | 4.294 |
| 11/15/2017 13:02 | 26.84  | 139.67 | 229.26 | 520.08  | 3.657 |
| 11/15/2017 13:03 | 30.82  | 151.15 | 253.04 | 463.60  | 3.533 |
| 11/15/2017 13:04 | 47.13  | 235.90 | 335.55 | 582.26  | 3.998 |
| 11/15/2017 13:05 | 50.26  | 261.62 | 403.01 | 950.20  | 5.044 |
| 11/15/2017 13:06 | 38.38  | 192.50 | 314.13 | 643.89  | 4.232 |
| 11/15/2017 13:07 | 44.15  | 212.27 | 357.27 | 701.89  | 4.203 |
| 11/15/2017 13:08 | 49.82  | 265.92 | 384.31 | 850.83  | 4.701 |
| 11/15/2017 13:09 | 40.06  | 197.58 | 294.98 | 579.02  | 4.253 |
| 11/15/2017 13:10 | 43.12  | 199.27 | 271.49 | 585.39  | 4.367 |
| 11/15/2017 13:11 | 92.40  | 395.45 | 460.65 | 838.58  | 5.485 |
| 11/15/2017 13:12 | 62.98  | 316.38 | 416.57 | 955.48  | 6.080 |
| 11/15/2017 13:13 | 47.86  | 243.47 | 346.36 | 756.71  | 5.114 |
| 11/15/2017 13:14 | 36.83  | 165.35 | 266.12 | 491.78  | 4.102 |
| 11/15/2017 13:15 | 44.33  | 222.53 | 336.30 | 797.51  | 4.555 |
| 11/15/2017 13:16 | 38.91  | 176.03 | 286.72 | 663.42  | 4.491 |
| 11/15/2017 13:17 | 74.88  | 347.33 | 483.50 | 960.63  | 5.224 |
| 11/15/2017 13:18 | 51.41  | 214.42 | 374.69 | 911.27  | 5.383 |
| 11/15/2017 13:19 | 148.52 | 313.85 | 436.43 | 960.10  | 5.431 |
| 11/15/2017 13:20 | 58.62  | 271.78 | 390.88 | 921.40  | 5.249 |
| 11/15/2017 13:21 | 55.02  | 245.87 | 380.32 | 846.52  | 5.174 |
| 11/15/2017 13:22 | 42.69  | 193.43 | 306.61 | 668.02  | 4.584 |
| 11/15/2017 13:23 | 74.12  | 306.55 | 462.10 | 942.35  | 5.278 |
| 11/15/2017 13:24 | 78.45  | 364.37 | 486.19 | 1160.90 | 6.185 |
| 11/15/2017 13:25 | 59.46  | 259.50 | 370.05 | 925.58  | 5.713 |
| 11/15/2017 13:26 | 57.21  | 253.10 | 370.10 | 958.00  | 5.261 |
| 11/15/2017 13:27 | 55.43  | 253.57 | 359.87 | 821.93  | 5.137 |
| 11/15/2017 13:28 | 55.72  | 238.62 | 373.49 | 782.41  | 4.959 |
| 11/15/2017 13:29 | 59.07  | 254.45 | 381.19 | 805.43  | 5.234 |
| 11/15/2017 13:30 | 63.43  | 263.70 | 377.34 | 909.38  | 5.396 |
| 11/15/2017 13:31 | 58.61  | 251.97 | 394.96 | 855.96  | 5.577 |

|                  |        |         |        |         |        |
|------------------|--------|---------|--------|---------|--------|
| 11/15/2017 13:32 | 49.88  | 205.53  | 310.08 | 683.13  | 4.982  |
| 11/15/2017 13:33 | 45.02  | 198.40  | 255.77 | 535.70  | 4.612  |
| 11/15/2017 13:34 | 45.62  | 196.32  | 286.31 | 605.38  | 4.737  |
| 11/15/2017 13:35 | 40.38  | 180.97  | 267.01 | 557.53  | 4.322  |
| 11/15/2017 13:36 | 51.18  | 211.95  | 340.84 | 689.94  | 4.844  |
| 11/15/2017 13:37 | 35.03  | 142.43  | 252.78 | 535.13  | 4.406  |
| 11/15/2017 13:38 | 30.88  | 139.82  | 203.09 | 449.47  | 3.974  |
| 11/15/2017 13:39 | 41.92  | 180.23  | 249.26 | 459.27  | 4.210  |
| 11/15/2017 13:40 | 54.98  | 227.88  | 307.96 | 654.70  | 4.917  |
| 11/15/2017 13:41 | 45.38  | 194.08  | 262.05 | 522.31  | 4.768  |
| 11/15/2017 13:42 | 71.15  | 281.45  | 384.31 | 904.45  | 5.171  |
| 11/15/2017 13:43 | 55.54  | 227.53  | 334.05 | 659.33  | 4.907  |
| 11/15/2017 13:44 | 97.63  | 384.25  | 534.36 | 1003.35 | 6.274  |
| 11/15/2017 13:45 | 104.96 | 438.33  | 473.44 | 1114.07 | 7.735  |
| 11/15/2017 13:46 | 71.07  | 303.03  | 393.45 | 944.39  | 6.468  |
| 11/15/2017 13:47 | 75.39  | 303.00  | 403.37 | 872.43  | 5.926  |
| 11/15/2017 13:48 | 88.61  | 344.23  | 409.21 | 816.57  | 6.288  |
| 11/15/2017 13:49 | 95.02  | 402.72  | 465.52 | 1003.74 | 6.891  |
| 11/15/2017 13:50 | 77.90  | 321.87  | 470.18 | 1066.43 | 6.353  |
| 11/15/2017 13:51 | 106.04 | 418.32  | 591.75 | 1263.00 | 6.568  |
| 11/15/2017 13:52 | 360.08 | 1482.25 | 576.73 | 876.30  | 11.208 |
| 11/15/2017 13:53 | 423.03 | 2007.50 | 375.53 | 347.88  | 19.833 |
| 11/15/2017 13:54 | 111.72 | 497.83  | 142.39 | 130.36  | 11.106 |
| 11/15/2017 13:55 | 44.60  | 192.08  | 93.99  | 82.40   | 5.362  |
| 11/15/2017 13:56 | 19.77  | 95.72   | 55.66  | 48.82   | 3.858  |
| 11/15/2017 13:57 | 17.88  | 95.56   | 66.33  | 78.77   | 3.581  |
| 11/15/2017 13:58 | 43.64  | 161.10  | 163.25 | 280.85  | 3.731  |
| 11/15/2017 13:59 | 99.58  | 354.58  | 295.00 | 959.18  | 6.539  |
| 11/15/2017 14:00 | 72.52  | 280.60  | 295.00 | 774.93  | 5.992  |
| 11/15/2017 14:01 | 25.46  | 97.62   | 114.56 | 196.83  | 4.103  |
| 11/15/2017 14:02 | 36.37  | 136.89  | 133.09 | 230.87  | 3.844  |
| 11/15/2017 14:03 | 64.49  | 257.75  | 171.21 | 315.03  | 4.779  |
| 11/15/2017 14:04 | 35.49  | 139.47  | 170.72 | 350.15  | 4.102  |
| 11/15/2017 14:05 | 39.69  | 162.12  | 167.42 | 330.57  | 4.155  |
| 11/15/2017 14:06 | 30.44  | 125.16  | 144.38 | 309.18  | 3.635  |
| 11/15/2017 14:07 | 39.08  | 145.97  | 143.18 | 282.03  | 3.894  |
| 11/15/2017 14:08 | 27.72  | 118.92  | 108.41 | 267.92  | 3.786  |
| 11/15/2017 14:09 | 31.48  | 111.85  | 114.87 | 193.73  | 3.455  |
| 11/15/2017 14:10 | 29.63  | 116.15  | 167.20 | 325.45  | 3.601  |
| 11/15/2017 14:11 | 85.91  | 330.97  | 450.28 | 1051.88 | 4.557  |
| 11/15/2017 14:12 | 120.13 | 393.62  | 667.65 | 1367.62 | 5.843  |
| 11/15/2017 14:13 | 52.53  | 216.50  | 196.76 | 473.80  | 6.158  |
| 11/15/2017 14:14 | 137.28 | 469.37  | 280.28 | 272.58  | 5.225  |
| 11/15/2017 14:15 | 250.69 | 953.02  | 386.74 | 323.63  | 9.821  |
| 11/15/2017 14:16 | 154.93 | 605.47  | 275.10 | 311.63  | 8.567  |
| 11/15/2017 14:17 | 54.29  | 218.72  | 109.26 | 139.51  | 5.916  |
| 11/15/2017 14:18 | 20.65  | 81.84   | 57.27  | 43.64   | 3.259  |

|                  |        |        |        |        |       |
|------------------|--------|--------|--------|--------|-------|
| 11/15/2017 14:19 | 30.87  | 129.67 | 76.96  | 59.43  | 3.615 |
| 11/15/2017 14:20 | 10.12  | 41.66  | 28.98  | 33.56  | 2.875 |
| 11/15/2017 14:21 | 59.01  | 202.70 | 174.11 | 282.09 | 3.957 |
| 11/15/2017 14:22 | 100.73 | 311.12 | 383.15 | 669.85 | 5.704 |
| 11/15/2017 14:23 | 100.36 | 359.20 | 294.31 | 633.68 | 6.074 |
| 11/15/2017 14:24 | 85.92  | 268.60 | 259.73 | 538.75 | 6.078 |
| 11/15/2017 14:25 | 84.63  | 280.10 | 285.64 | 675.20 | 5.844 |
| 11/15/2017 14:26 | 72.88  | 219.43 | 219.54 | 434.22 | 5.048 |
| 11/15/2017 14:27 | 71.72  | 252.85 | 256.51 | 570.92 | 5.529 |
| 11/15/2017 14:28 | 71.16  | 217.33 | 248.17 | 456.78 | 4.724 |
| 11/15/2017 14:29 | 76.44  | 266.08 | 242.26 | 491.87 | 5.263 |
| 11/15/2017 14:30 | 55.88  | 189.32 | 210.89 | 432.63 | 4.691 |
| 11/15/2017 14:31 | 61.42  | 206.02 | 205.70 | 397.35 | 4.410 |
| 11/15/2017 14:32 | 57.22  | 186.72 | 219.96 | 463.25 | 4.537 |
| 11/15/2017 14:33 | 55.73  | 179.95 | 196.79 | 408.42 | 4.218 |
| 11/15/2017 14:34 | 64.43  | 218.38 | 241.35 | 519.05 | 4.674 |
| 11/15/2017 14:35 | 51.04  | 181.10 | 205.48 | 398.62 | 4.296 |
| 11/15/2017 14:36 | 39.23  | 127.85 | 155.50 | 316.57 | 3.776 |
| 11/15/2017 14:37 | 49.50  | 158.55 | 178.13 | 349.95 | 3.805 |
| 11/15/2017 14:38 | 51.38  | 164.58 | 208.74 | 476.97 | 4.196 |
| 11/15/2017 14:39 | 54.77  | 172.25 | 183.60 | 367.48 | 3.959 |
| 11/15/2017 14:40 | 137.47 | 385.70 | 353.89 | 807.55 | 6.147 |
| 11/15/2017 14:41 | 104.71 | 328.98 | 284.94 | 608.60 | 6.110 |
| 11/15/2017 14:42 | 86.68  | 271.25 | 260.34 | 577.52 | 5.210 |
| 11/15/2017 14:43 | 89.51  | 284.53 | 244.11 | 479.05 | 5.381 |
| 11/15/2017 14:44 | 101.92 | 295.47 | 272.25 | 502.85 | 5.393 |
| 11/15/2017 14:45 | 65.99  | 216.17 | 202.93 | 446.02 | 5.037 |
| 11/15/2017 14:46 | 36.57  | 132.33 | 136.33 | 246.57 | 3.898 |
| 11/15/2017 14:47 | 21.63  | 81.22  | 89.78  | 127.98 | 3.173 |
| 11/15/2017 14:48 | 9.24   | 34.33  | 52.82  | 68.89  | 2.690 |
| 11/15/2017 14:49 | 10.78  | 37.95  | 58.83  | 94.23  | 2.572 |
| 11/15/2017 14:50 | 19.77  | 61.24  | 62.22  | 68.36  | 2.726 |
| 11/15/2017 14:51 | 17.83  | 50.63  | 50.93  | 47.89  | 2.828 |
| 11/15/2017 14:52 | 14.00  | 38.36  | 47.07  | 35.95  | 2.663 |
| 11/15/2017 14:53 | 18.82  | 47.56  | 36.62  | 29.42  | 2.755 |
| 11/15/2017 14:54 | 18.88  | 54.72  | 39.76  | 26.52  | 2.773 |
| 11/15/2017 14:55 | 11.68  | 35.20  | 32.21  | 41.32  | 2.790 |
| 11/15/2017 14:56 | 7.93   | 15.54  | 25.58  | 41.72  | 2.517 |
| 11/15/2017 14:57 | 6.89   | 9.40   | 16.99  | 18.97  | 2.446 |
| 11/15/2017 14:58 | 10.59  | 27.09  | 33.12  | 13.71  | 2.763 |
| 11/15/2017 14:59 | 7.99   | 17.96  | 20.77  | 14.99  | 3.237 |
| 11/15/2017 15:00 | 5.66   | 6.57   | 19.71  | 5.05   | 3.282 |
| 11/15/2017 15:01 | 5.93   | 3.20   | 19.71  | 1.65   | 2.199 |
| 11/15/2017 15:02 | 5.79   | 4.53   | 5.61   | 1.53   | 2.127 |
| 11/15/2017 15:03 | 5.80   | 5.10   | 3.40   | 1.18   | 2.556 |
| 11/15/2017 15:04 | 5.63   | 12.95  | 4.77   | 3.51   | 3.905 |
| 11/15/2017 15:05 | 5.53   | 5.65   | 4.59   | 1.60   | 3.757 |

|                  |       |       |      |       |       |
|------------------|-------|-------|------|-------|-------|
| 11/15/2017 15:06 | 7.13  | 8.04  | 3.29 | 1.24  | 2.069 |
| 11/15/2017 15:07 | 7.96  | 8.83  | 3.07 | 1.61  | 2.144 |
| 11/15/2017 15:08 | 9.22  | 12.18 | 3.30 | 1.74  | 2.275 |
| 11/15/2017 15:09 | 9.25  | 8.64  | 3.28 | 1.90  | 2.212 |
| 11/15/2017 15:10 | 9.51  | 6.65  | 3.07 | 1.73  | 2.141 |
| 11/15/2017 15:11 | 11.08 | 12.22 | 3.86 | 2.34  | 2.153 |
| 11/15/2017 15:12 | 11.80 | 11.99 | 2.49 | 1.24  | 2.323 |
| 11/15/2017 15:13 | 10.88 | 11.22 | 2.20 | 1.26  | 2.199 |
| 11/15/2017 15:14 | 11.73 | 12.55 | 2.14 | 1.34  | 2.320 |
| 11/15/2017 15:15 | 12.08 | 13.41 | 2.10 | 1.45  | 2.375 |
| 11/15/2017 15:16 | 11.18 | 11.73 | 1.93 | 1.31  | 2.639 |
| 11/15/2017 15:17 | 10.91 | 11.28 | 1.80 | 1.16  | 2.401 |
| 11/15/2017 15:18 | 11.03 | 9.75  | 1.61 | 1.36  | 2.355 |
| 11/15/2017 15:19 | 11.26 | 10.82 | 1.54 | 1.40  | 2.263 |
| 11/15/2017 15:20 | 10.97 | 7.04  | 1.34 | 0.84  | 2.280 |
| 11/15/2017 15:21 | 10.32 | 9.41  | 1.26 | 0.95  | 2.035 |
| 11/15/2017 15:22 | 10.45 | 8.06  | 1.22 | 1.15  | 2.004 |
| 11/15/2017 15:23 | 11.03 | 8.29  | 1.06 | 0.73  | 2.209 |
| 11/15/2017 15:24 | 11.90 | 9.44  | 1.05 | 0.91  | 2.121 |
| 11/15/2017 15:25 | 9.48  | 9.07  | 1.03 | 1.07  | 2.005 |
| 11/15/2017 15:26 | 10.52 | 9.27  | 1.02 | 0.77  | 2.050 |
| 11/15/2017 15:27 | 8.42  | 10.09 | 1.32 | 0.96  | 2.367 |
| 11/15/2017 15:28 | 11.14 | 9.73  | 1.05 | 1.00  | 2.183 |
| 11/15/2017 15:29 | 13.02 | 10.20 | 0.99 | 0.81  | 2.022 |
| 11/15/2017 15:30 | 11.96 | 9.30  | 1.02 | 0.75  | 2.005 |
| 11/15/2017 15:31 | 13.63 | 9.51  | 1.25 | 1.85  | 1.993 |
| 11/15/2017 15:32 | 13.36 | 9.66  | 2.33 | 3.72  | 2.008 |
| 11/15/2017 15:33 | 11.97 | 10.04 | 1.91 | 2.32  | 2.007 |
| 11/15/2017 15:34 | 12.87 | 11.45 | 1.34 | 1.20  | 2.046 |
| 11/15/2017 15:35 | 11.23 | 9.93  | 3.21 | 14.25 | 2.459 |
| 11/15/2017 15:36 | 13.20 | 11.67 | 1.36 | 1.18  | 5.366 |
| 11/15/2017 15:37 | 12.53 | 12.66 | 0.90 | 1.04  | 7.414 |
| 11/15/2017 15:38 | 12.05 | 11.98 | 0.86 | 0.89  | 4.123 |
| 11/15/2017 15:39 | 13.90 | 11.97 | 0.84 | 0.98  | 2.029 |
| 11/15/2017 15:40 | 14.13 | 13.80 | 2.04 | 2.57  | 2.202 |
| 11/15/2017 15:41 | 13.38 | 14.51 | 1.43 | 1.19  | 2.110 |
| 11/15/2017 15:42 | 12.72 | 14.31 | 0.82 | 0.65  | 2.304 |
| 11/15/2017 15:43 | 14.73 | 15.87 | 0.75 | 0.79  | 3.182 |
| 11/15/2017 15:44 | 15.12 | 15.39 | 0.81 | 0.80  | 4.921 |
| 11/15/2017 15:45 | 13.92 | 16.62 | 0.77 | 1.01  | 2.891 |
| 11/15/2017 15:46 | 15.91 | 17.41 | 2.55 | 3.71  | 2.196 |
| 11/15/2017 15:47 | 14.66 | 16.35 | 4.64 | 4.69  | 2.186 |
| 11/15/2017 15:48 | 17.28 | 16.49 | 1.45 | 1.30  | 2.172 |
| 11/15/2017 15:49 | 16.85 | 17.25 | 1.67 | 1.28  | 2.424 |
| 11/15/2017 15:50 | 15.68 | 17.43 | 0.95 | 1.03  | 2.223 |
| 11/15/2017 15:51 | 14.91 | 17.42 | 0.61 | 0.85  | 2.158 |
| 11/15/2017 15:52 | 16.63 | 18.05 | 0.45 | 0.80  | 2.111 |

|                  |        |        |       |      |       |
|------------------|--------|--------|-------|------|-------|
| 11/15/2017 15:53 | 15.08  | 16.76  | 0.37  | 0.96 | 2.058 |
| 11/15/2017 15:54 | 15.65  | 16.45  | 0.39  | 1.07 | 2.007 |
| 11/15/2017 15:55 | 16.51  | 16.64  | 0.40  | 1.12 | 2.016 |
| 11/15/2017 15:56 | 18.59  | 17.29  | 0.43  | 1.14 | 1.988 |
| 11/15/2017 15:57 | 17.97  | 18.27  | 0.25  | 0.95 | 1.935 |
| 11/15/2017 15:58 | 18.08  | 17.67  | 0.20  | 1.10 | 1.891 |
| 11/15/2017 15:59 | 18.89  | 17.40  | 0.25  | 1.15 | 1.883 |
| 11/15/2017 16:00 | 15.73  | 14.69  | 0.24  | 0.69 | 1.899 |
| 11/15/2017 16:01 | 18.16  | 15.26  | 0.25  | 0.86 | 1.875 |
| 11/15/2017 16:02 | 23.68  | 15.28  | 0.25  | 0.99 | 1.803 |
| 11/15/2017 16:03 | 19.98  | 17.53  | 0.17  | 0.86 | 1.826 |
| 11/15/2017 16:04 | 27.51  | 21.85  | 0.12  | 1.23 | 1.829 |
| 11/15/2017 16:05 | 27.67  | 21.15  | 0.15  | 1.13 | 1.785 |
| 11/15/2017 16:06 | -0.36  | -17.28 | 0.09  | 1.34 | 1.780 |
| 11/15/2017 16:07 | -2.27  | -10.69 | 0.10  | 1.26 | 1.748 |
| 11/15/2017 16:08 | -1.73  | -3.40  | 0.11  | 1.29 | 1.767 |
| 11/15/2017 16:09 | -3.11  | -1.23  | 0.11  | 1.21 | 1.762 |
| 11/15/2017 16:10 | -2.04  | 0.33   | 0.08  | 1.47 | 1.743 |
| 11/15/2017 16:11 | -1.53  | 0.33   | 0.40  | 1.53 | 1.759 |
| 11/15/2017 16:12 | 151.43 | 134.27 | 0.30  | 1.25 | 1.744 |
| 11/15/2017 16:13 | 86.77  | 87.84  | 0.13  | 1.28 | 1.723 |
| 11/15/2017 16:14 | 89.22  | 89.45  | 0.06  | 1.16 | 1.722 |
| 11/15/2017 16:15 | 93.15  | 94.14  | 0.05  | 1.12 | 1.720 |
| 11/15/2017 16:16 | 97.53  | 97.17  | 0.00  | 1.26 | 1.757 |
| 11/15/2017 16:17 | 97.69  | 97.27  | 0.03  | 1.19 | 1.733 |
| 11/15/2017 16:18 | 99.16  | 96.67  | 0.03  | 1.48 | 1.754 |
| 11/15/2017 16:19 | 89.33  | 93.12  | 0.10  | 1.29 | 1.773 |
| 11/15/2017 16:20 | 16.86  | 31.64  | 0.01  | 1.05 | 1.711 |
| 11/15/2017 16:21 | 19.57  | 26.73  | -0.01 | 1.04 | 1.690 |
| 11/15/2017 16:22 | 18.55  | 19.44  | 0.04  | 1.16 | 1.684 |
| 11/15/2017 16:23 | 20.92  | 17.53  | 0.06  | 1.09 | 1.765 |
| 11/15/2017 16:24 | 20.99  | 16.54  | 0.22  | 1.13 | 1.861 |
| 11/15/2017 16:25 | 18.88  | 15.55  | 0.09  | 1.12 | 1.705 |
| 11/15/2017 16:26 | 19.98  | 15.34  | 0.02  | 1.19 | 1.709 |
| 11/15/2017 16:27 | 20.38  | 15.83  | -0.05 | 1.14 | 1.723 |
| 11/15/2017 16:28 | -28.25 | 16.28  | -0.04 | 1.18 | 1.707 |
| 11/15/2017 16:29 | 19.93  | 15.42  | -0.05 | 1.10 | 1.707 |
| 11/15/2017 16:30 | 20.47  | 16.63  | -0.06 | 1.10 | 1.695 |
| 11/15/2017 16:31 | 19.44  | 16.48  | 0.03  | 1.14 | 1.699 |
| 11/15/2017 16:32 | 20.89  | 16.46  | -0.01 | 1.10 | 1.697 |
| 11/15/2017 16:33 | 20.42  | 16.06  | 0.01  | 1.06 | 1.684 |
| 11/15/2017 16:34 | 19.01  | 15.36  | -0.03 | 1.07 | 1.693 |
| 11/15/2017 16:35 | 20.84  | 16.44  | -0.03 | 1.05 | 1.708 |
| 11/15/2017 16:36 | 19.71  | 17.05  | 0.03  | 1.04 | 1.723 |
| 11/15/2017 16:37 | 19.64  | 15.74  | 0.17  | 1.87 | 1.712 |
| 11/15/2017 16:38 | 21.03  | 15.08  | 2.40  | 4.87 | 1.672 |
| 11/15/2017 16:39 | 19.34  | 14.89  | 0.46  | 1.46 | 1.657 |

|                  |       |       |       |       |       |
|------------------|-------|-------|-------|-------|-------|
| 11/15/2017 16:40 | 18.83 | 14.27 | 0.08  | 1.32  | 1.653 |
| 11/15/2017 16:41 | 19.64 | 14.81 | 0.01  | 0.94  | 1.659 |
| 11/15/2017 16:42 | 20.53 | 15.84 | 0.00  | 0.89  | 1.661 |
| 11/15/2017 16:43 | 20.84 | 16.55 | -0.03 | 1.00  | 1.690 |
| 11/15/2017 16:44 | 19.84 | 15.40 | -0.07 | 1.03  | 1.682 |
| 11/15/2017 16:45 | 19.64 | 14.47 | -0.07 | 0.97  | 1.649 |
| 11/15/2017 16:46 | 18.35 | 13.26 | -0.13 | 1.05  | 1.683 |
| 11/15/2017 16:47 | 19.83 | 14.49 | 0.06  | 1.02  | 1.692 |
| 11/15/2017 16:48 | 20.01 | 14.60 | -0.05 | 0.80  | 1.658 |
| 11/15/2017 16:49 | 19.40 | 14.17 | -0.05 | 0.88  | 1.673 |
| 11/15/2017 16:50 | 18.89 | 12.18 | 0.15  | 1.06  | 1.703 |
| 11/15/2017 16:51 | 20.34 | 10.71 | -0.52 | 1.01  | 1.727 |
| 11/15/2017 16:52 | 18.88 | 9.53  | -0.56 | 0.44  | 1.733 |
| 11/15/2017 16:53 | 18.33 | 10.23 | -0.57 | 0.43  | 1.714 |
| 11/15/2017 16:54 | 18.94 | 11.23 | -0.54 | 16.89 | 1.726 |
| 11/15/2017 16:55 | 19.86 | 12.09 | -0.35 | 96.81 | 1.759 |
| 11/15/2017 16:56 | 18.92 | 12.74 | -0.17 | 96.73 | 1.772 |
| 11/15/2017 16:57 | 19.06 | 13.71 | -0.03 | 96.67 | 1.764 |
| 11/15/2017 16:58 | 19.74 | 13.05 | 0.06  | 96.85 | 1.762 |
| 11/15/2017 16:59 | 17.90 | 12.52 | 0.11  | 96.57 | 1.762 |
| 11/15/2017 17:00 | 18.81 | 12.82 | 0.11  | 96.40 | 1.752 |
| 11/15/2017 17:01 | 18.00 | 11.69 | 0.09  | 96.89 | 1.731 |
| 11/15/2017 17:02 | 19.34 | 11.74 | 0.10  | 76.58 | 1.734 |
| 11/15/2017 17:03 | 18.76 | 11.84 | 0.10  | 12.35 | 1.731 |
| 11/15/2017 17:04 | 18.75 | 10.81 | 61.84 | 8.02  | 1.746 |
| 11/15/2017 17:05 | 18.91 | 11.34 | 92.92 | 8.64  | 1.758 |
| 11/15/2017 17:06 | 17.03 | 10.33 | 92.85 | 8.61  | 1.743 |
| 11/15/2017 17:07 | 17.22 | 10.67 | 71.80 | 8.25  | 1.755 |
| 11/15/2017 17:08 | 19.87 | 11.16 | 0.30  | 1.39  | 1.775 |
| 11/15/2017 17:09 | 18.82 | 11.55 | 0.01  | 0.60  | 1.780 |
| 11/15/2017 17:10 | 16.96 | 11.03 | -0.01 | 0.79  | 1.804 |
| 11/15/2017 17:11 | 18.70 | 11.80 | -0.03 | 0.69  | 1.809 |
| 11/15/2017 17:12 | 19.87 | 11.50 | -0.04 | 1.03  | 1.798 |
| 11/15/2017 17:13 | 19.82 | 12.28 | -0.03 | 0.76  | 1.809 |
| 11/15/2017 17:14 | 15.54 | 8.57  | 0.01  | 0.83  | 1.816 |
| 11/15/2017 17:15 | 10.78 | 5.30  | -0.01 | 0.66  | 1.764 |
| 11/15/2017 17:16 | 10.63 | 4.44  | -0.02 | 0.67  | 1.765 |
| 11/15/2017 17:17 | 10.07 | 5.41  | -0.06 | 0.70  | 1.777 |



## USFS Missoula Chamber 2018

| Date&Time      | O3 NO-CL | O3 SL-UV | O3 UV-C-H | O3 UV-C | NO2-C | NO  | CO     | THC |
|----------------|----------|----------|-----------|---------|-------|-----|--------|-----|
| 4/16/2018 0:00 | 0.2      | 0.8      | 1.6       | 19.4    | 4.2   | 4.4 | 0.0417 | 3.6 |
| 4/16/2018 0:01 | 0.2      | 1.5      | 3.6       | 19.1    | 4.2   | 4.4 | 0.0502 | 3.9 |
| 4/16/2018 0:02 | 0.2      | 0.6      | 2.8       | 18.9    | 4.2   | 4.4 | 0.0462 | 4.2 |
| 4/16/2018 0:03 | 0.1      | 0.5      | 2.2       | 19.1    | 4.2   | 4.4 | 0.047  | 4.3 |
| 4/16/2018 0:04 | 0.1      | 1.4      | 1.3       | 19.2    | 4.2   | 4.4 | 0.0591 | 4.5 |
| 4/16/2018 0:05 | 0.1      | 1        | 1.2       | 19.5    | 4.2   | 4.4 | 0.0417 | 4.6 |
| 4/16/2018 0:06 | 0.2      | 1        | 1.9       | 19.4    | 4.2   | 4.4 | 0.0602 | 4.6 |
| 4/16/2018 0:07 | 0.2      | 0.8      | 3.1       | 19.2    | 4.2   | 4.4 | 0.0391 | 4.5 |
| 4/16/2018 0:08 | 0.2      | 0.7      | 2.1       | 19.3    | 4.1   | 4.4 | 0.0472 | 4.5 |
| 4/16/2018 0:09 | 0.2      | 0.9      | 2.4       | 19.6    | 4.2   | 4.4 | 0.05   | 4.4 |
| 4/16/2018 0:10 | 0.2      | 0.7      | 2         | 19.2    | 4.2   | 4.4 | 0.044  | 4.5 |
| 4/16/2018 0:11 | 0.2      | 0.9      | 2.6       | 19.3    | 4.2   | 4.4 | 0.0542 | 4.2 |
| 4/16/2018 0:12 | 0.2      | 0.9      | 1.5       | 19.4    | 4.2   | 4.4 | 0.0408 | 2.5 |
| 4/16/2018 0:13 | 0.2      | 0.4      | 2.5       | 19.2    | 4.2   | 4.4 | 0.0526 | 2.1 |
| 4/16/2018 0:14 | 0.2      | 1.2      | 2.3       | 19      | 4.2   | 4.4 | 0.0501 | 2.3 |
| 4/16/2018 0:15 | 0.2      | 1.2      | 1.9       | 19.2    | 4.2   | 4.4 | 0.0367 | 2.5 |
| 4/16/2018 0:16 | 0.1      | 0.6      | 1.5       | 19.2    | 4.2   | 4.4 | 0.0502 | 2.7 |
| 4/16/2018 0:17 | 0.1      | 0.3      | 2         | 19.2    | 4.1   | 4.4 | 0.042  | 2.9 |
| 4/16/2018 0:18 | 0.1      | 0.9      | 2.7       | 19.1    | 4.1   | 4.4 | 0.0527 | 3.1 |
| 4/16/2018 0:19 | 0.1      | 0.6      | 2.5       | 19.4    | 4.2   | 4.4 | 0.0483 | 3.2 |
| 4/16/2018 0:20 | 0.1      | 0.4      | 2.8       | 19.2    | 4.1   | 4.4 | 0.0435 | 3.5 |
| 4/16/2018 0:21 | 0.1      | 1.3      | 1.3       | 19.2    | 4     | 4.4 | 0.0531 | 3.6 |
| 4/16/2018 0:22 | 0.1      | 1.6      | 2.3       | 19.2    | 4.1   | 4.4 | 0.0491 | 3.7 |
| 4/16/2018 0:23 | 0.1      | 0.5      | 3.4       | 19.3    | 4.1   | 4.4 | 0.0469 | 3.8 |
| 4/16/2018 0:24 | 0        | 1        | 1.6       | 19.3    | 4.2   | 4.4 | 0.0516 | 3.9 |
| 4/16/2018 0:25 | 0        | 1.2      | 2.4       | 19.1    | 4.1   | 4.4 | 0.0384 | 4   |
| 4/16/2018 0:26 | 0.1      | 1.5      | 3.2       | 19.1    | 4.1   | 4.4 | 0.0528 | 4   |
| 4/16/2018 0:27 | 0.1      | 0.7      | 3         | 19.5    | 4.2   | 4.4 | 0.0436 | 4.1 |
| 4/16/2018 0:28 | 0.1      | 0.9      | 1.5       | 19.3    | 4.1   | 4.4 | 0.0486 | 4.1 |
| 4/16/2018 0:29 | 0.1      | 0.8      | 1.9       | 19.1    | 4     | 4.4 | 0.0495 | 4   |
| 4/16/2018 0:30 | 0.1      | 1        | 1.5       | 19.2    | 4.1   | 4.4 | 0.0365 | 4   |
| 4/16/2018 0:31 | 0.1      | 0.6      | 2         | 19.4    | 4.1   | 4.4 | 0.0551 | 4   |
| 4/16/2018 0:32 | 0.2      | 0        | 1.8       | 19.2    | 4.1   | 4.4 | 0.0394 | 4.1 |
| 4/16/2018 0:33 | 0.2      | 1        | 1.7       | 19.3    | 4.1   | 4.5 | 0.0443 | 4.1 |
| 4/16/2018 0:34 | 0.2      | 1        | 0.9       | 19.1    | 4.1   | 4.4 | 0.0553 | 4.1 |
| 4/16/2018 0:35 | 0.3      | 1        | 3.1       | 19.1    | 4.2   | 4.4 | 0.041  | 4.1 |
| 4/16/2018 0:36 | 0.3      | 0.9      | 2.9       | 19.1    | 4.1   | 4.5 | 0.0505 | 4   |
| 4/16/2018 0:37 | 0.2      | 1        | 1.6       | 19.4    | 4.2   | 4.4 | 0.0464 | 4   |
| 4/16/2018 0:38 | 0.2      | 0.9      | 2.1       | 19.3    | 4.1   | 4.4 | 0.0463 | 4.1 |
| 4/16/2018 0:39 | 0.2      | 0.9      | 2.6       | 19.3    | 4.1   | 4.4 | 0.0483 | 4.1 |
| 4/16/2018 0:40 | 0.2      | 1        | 2.6       | 19.1    | 4.1   | 4.4 | 0.0403 | 4.1 |
| 4/16/2018 0:41 | 0.2      | 1        | 2         | 19.1    | 4.1   | 4.4 | 0.0508 | 4.2 |
| 4/16/2018 0:42 | 0.2      | 0.8      | 3.2       | 19.3    | 4.1   | 4.4 | 0.0386 | 4.2 |
| 4/16/2018 0:43 | 0.2      | 0.6      | 3.2       | 19.2    | 4.1   | 4.5 | 0.0533 | 4.3 |
| 4/16/2018 0:44 | 0.2      | 1.6      | 2.6       | 19.3    | 4.2   | 4.4 | 0.0424 | 4.4 |

|                |     |       |     |      |     |     |        |     |
|----------------|-----|-------|-----|------|-----|-----|--------|-----|
| 4/16/2018 0:45 | 0.3 | 0.6   | 1.4 | 19.2 | 4.1 | 4.4 | 0.0448 | 4.4 |
| 4/16/2018 0:46 | 0.3 | 0.2   | 2.4 | 19.4 | 4.1 | 4.4 | 0.0494 | 4.4 |
| 4/16/2018 0:47 | 0.3 | 0.9   | 1.8 | 19.4 | 4.1 | 4.5 | 0.0363 | 4.5 |
| 4/16/2018 0:48 | 0.3 | 0.5   | 0.6 | 19.1 | 4.2 | 4.5 | 0.0522 | 4.6 |
| 4/16/2018 0:49 | 0.3 | 0.4   | 1.7 | 19.1 | 4.1 | 4.5 | 0.0411 | 4.6 |
| 4/16/2018 0:50 | 0.2 | 0.6   | 2   | 19.4 | 4.2 | 4.4 | 0.0434 | 4.5 |
| 4/16/2018 0:51 | 0.2 | 1.1   | 2.4 | 19.6 | 4.3 | 4.4 | 0.0425 | 4.5 |
| 4/16/2018 0:52 | 0.2 | -0.4  | 3.4 | 19.2 | 4.2 | 4.4 | 0.0389 | 4.6 |
| 4/16/2018 0:53 | 0.2 | -3.2  | 3.3 | 19   | 4.2 | 4.4 | 0.0465 | 4.6 |
| 4/16/2018 0:54 | 0.2 | -7.7  | 1.2 | 19.1 | 4.3 | 4.4 | 0.041  | 4.6 |
| 4/16/2018 0:55 | 0.2 | -9.2  | 1.3 | 19.1 | 4.2 | 4.4 | 0.0502 | 4.6 |
| 4/16/2018 0:56 | 0.2 | -9.5  | 1.4 | 19.3 | 4.1 | 4.4 | 0.0413 | 4.7 |
| 4/16/2018 0:57 | 0.2 | -10   | 3   | 19   | 4.2 | 4.4 | 0.0467 | 4.7 |
| 4/16/2018 0:58 | 0.3 | -10.5 | 2.2 | 19.1 | 4.2 | 4.4 | 0.0424 | 4.7 |
| 4/16/2018 0:59 | 0.2 | -10.9 | 2.4 | 19.3 | 4.2 | 4.4 | 0.0381 | 4.8 |
| 4/16/2018 1:00 | 0.3 | -10.5 | 3   | 19.2 | 4.2 | 4.4 | 0.0546 | 4.9 |
| 4/16/2018 1:01 | 0.2 | -10.9 | 2.9 | 19.2 | 4.2 | 4.4 | 0.0451 | 4.8 |
| 4/16/2018 1:02 | 0.3 | -10.9 | 1.7 | 19.3 | 4.2 | 4.4 | 0.0388 | 4.7 |
| 4/16/2018 1:03 | 0.3 | -10.5 | 1.9 | 19.3 | 4.2 | 4.4 | 0.0473 | 4.7 |
| 4/16/2018 1:04 | 0.2 | -11.3 | 2.8 | 19.2 | 4.2 | 4.4 | 0.0368 | 4.6 |
| 4/16/2018 1:05 | 0.2 | -11   | 1.8 | 19   | 4.2 | 4.4 | 0.0471 | 4.7 |
| 4/16/2018 1:06 | 0.2 | -11.2 | 2.8 | 19   | 4.2 | 4.5 | 0.0429 | 4.7 |
| 4/16/2018 1:07 | 0.2 | -10.9 | 1.6 | 19.3 | 4.2 | 4.5 | 0.0374 | 4   |
| 4/16/2018 1:08 | 0.2 | -10.6 | 2   | 19.2 | 4.2 | 4.5 | 0.0502 | 2.7 |
| 4/16/2018 1:09 | 0.3 | -11.9 | 3.1 | 19.1 | 4.3 | 4.5 | 0.0369 | 2.8 |
| 4/16/2018 1:10 | 0.3 | -11.5 | 2.1 | 19.1 | 4.3 | 4.5 | 0.0473 | 3.1 |
| 4/16/2018 1:11 | 0.2 | -10.9 | 2.2 | 19.1 | 4.2 | 4.5 | 0.0489 | 3.2 |
| 4/16/2018 1:12 | 0.2 | -11.2 | 3.4 | 19   | 4.3 | 4.5 | 0.0417 | 3.3 |
| 4/16/2018 1:13 | 0.2 | -11.8 | 2.2 | 19.2 | 4.3 | 4.5 | 0.053  | 3.4 |
| 4/16/2018 1:14 | 0.2 | -11.1 | 2   | 19.3 | 4.2 | 4.5 | 0.0366 | 3.4 |
| 4/16/2018 1:15 | 0.2 | -11.4 | 1.8 | 19.3 | 4.4 | 4.5 | 0.0524 | 3.4 |
| 4/16/2018 1:16 | 0.2 | -11.2 | 2.5 | 19.3 | 4.4 | 4.4 | 0.0429 | 3.3 |
| 4/16/2018 1:17 | 0.3 | -11.4 | 1.8 | 19.2 | 4.3 | 4.5 | 0.045  | 3.2 |
| 4/16/2018 1:18 | 0.3 | -10.7 | 1.4 | 19.2 | 4.3 | 4.5 | 0.0499 | 2.9 |
| 4/16/2018 1:19 | 0.3 | -10.5 | 1.7 | 19   | 4.3 | 4.5 | 0.0313 | 1.8 |
| 4/16/2018 1:20 | 0.2 | -11.4 | 1.5 | 19.3 | 4.3 | 4.5 | 0.0494 | 1.6 |
| 4/16/2018 1:21 | 0.2 | -11.3 | 3.5 | 19.4 | 4.5 | 4.4 | 0.0383 | 1.7 |
| 4/16/2018 1:22 | 0.2 | -11.6 | 2.9 | 19.2 | 4.5 | 4.4 | 0.046  | 1.7 |
| 4/16/2018 1:23 | 0.2 | -11.2 | 1.7 | 19.4 | 4.6 | 4.4 | 0.0501 | 1.7 |
| 4/16/2018 1:24 | 0.2 | -10.8 | 2.5 | 19.4 | 4.6 | 4.4 | 0.0363 | 1.8 |
| 4/16/2018 1:25 | 0.2 | -11.5 | 2.5 | 19.4 | 4.6 | 4.4 | 0.0476 | 1.8 |
| 4/16/2018 1:26 | 0.2 | -10.9 | 2.1 | 19.4 | 4.7 | 4.3 | 0.0492 | 1.9 |
| 4/16/2018 1:27 | 0.2 | -10.8 | 2.3 | 19.4 | 4.6 | 4.3 | 0.0365 | 1.9 |
| 4/16/2018 1:28 | 0.2 | -11   | 1.5 | 19.1 | 4.5 | 4.3 | 0.0485 | 1.9 |
| 4/16/2018 1:29 | 0.2 | -11.7 | 0   | 19.2 | 4.4 | 4.3 | 0.0393 | 2   |
| 4/16/2018 1:30 | 0.2 | -10.8 | 2.9 | 19.3 | 4.4 | 4.3 | 0.0492 | 2   |
| 4/16/2018 1:31 | 0.2 | -11.1 | 3.5 | 19   | 4.4 | 4.3 | 0.0498 | 2   |

|                |     |       |     |      |     |     |        |     |
|----------------|-----|-------|-----|------|-----|-----|--------|-----|
| 4/16/2018 1:32 | 0.2 | -11.3 | 2.3 | 19.4 | 4.4 | 4.3 | 0.0405 | 2   |
| 4/16/2018 1:33 | 0.2 | -11.1 | 2   | 19.3 | 4.4 | 4.3 | 0.0514 | 2.1 |
| 4/16/2018 1:34 | 0.2 | -11.4 | 3.5 | 19   | 4.3 | 4.3 | 0.0386 | 2.3 |
| 4/16/2018 1:35 | 0.2 | -10.6 | 3   | 19.1 | 4.3 | 4.4 | 0.0498 | 2.3 |
| 4/16/2018 1:36 | 0.2 | -10.4 | 2.7 | 19.2 | 4.4 | 4.4 | 0.045  | 2.3 |
| 4/16/2018 1:37 | 0.1 | -10.7 | 2.4 | 19.3 | 4.4 | 4.4 | 0.0386 | 2.4 |
| 4/16/2018 1:38 | 0.2 | -10.1 | 2.9 | 19.2 | 4.5 | 4.4 | 0.0517 | 2.5 |
| 4/16/2018 1:39 | 0.2 | -10.9 | 1.7 | 19.2 | 4.6 | 4.4 | 0.0359 | 2.7 |
| 4/16/2018 1:40 | 0.2 | -11.3 | 2.6 | 19.5 | 4.6 | 4.3 | 0.0463 | 2.8 |
| 4/16/2018 1:41 | 0.2 | -10.9 | 3.8 | 19.2 | 4.5 | 4.3 | 0.0421 | 2.9 |
| 4/16/2018 1:42 | 0.1 | -10.4 | 3.9 | 19.2 | 4.5 | 4.3 | 0.0387 | 2.7 |
| 4/16/2018 1:43 | 0.1 | -10.4 | 2.3 | 19.2 | 4.5 | 4.3 | 0.0491 | 2.5 |
| 4/16/2018 1:44 | 0.1 | -10.8 | 2.7 | 19   | 4.5 | 4.3 | 0.0309 | 2.6 |
| 4/16/2018 1:45 | 0.1 | -10.9 | 2   | 19.1 | 4.4 | 4.3 | 0.0511 | 2.7 |
| 4/16/2018 1:46 | 0.1 | -10.9 | 1.9 | 19.4 | 4.5 | 4.3 | 0.0372 | 2.7 |
| 4/16/2018 1:47 | 0.1 | -10.4 | 4.1 | 19.2 | 4.5 | 4.3 | 0.0488 | 2.8 |
| 4/16/2018 1:48 | 0   | -11   | 1.5 | 19.2 | 4.5 | 4.3 | 0.0415 | 3   |
| 4/16/2018 1:49 | 0   | -11   | 2.1 | 19.3 | 4.5 | 4.3 | 0.0332 | 3.1 |
| 4/16/2018 1:50 | 0.1 | -10.6 | 2   | 19.2 | 4.5 | 4.3 | 0.0535 | 3.3 |
| 4/16/2018 1:51 | 0.1 | -10.5 | 3.7 | 19.1 | 4.4 | 4.3 | 0.0339 | 3.4 |
| 4/16/2018 1:52 | 0.1 | -10.9 | 1.3 | 19.2 | 4.4 | 4.3 | 0.048  | 3.4 |
| 4/16/2018 1:53 | 0   | -10.3 | 1.9 | 19.3 | 4.5 | 4.3 | 0.0357 | 3.6 |
| 4/16/2018 1:54 | 0   | -10.4 | 1.7 | 19.1 | 4.5 | 4.3 | 0.0393 | 3.6 |
| 4/16/2018 1:55 | 0   | -10.4 | 2.2 | 19.2 | 4.4 | 4.3 | 0.0422 | 3.6 |
| 4/16/2018 1:56 | 0   | -10.6 | 1.8 | 19.2 | 4.5 | 4.3 | 0.0315 | 3.7 |
| 4/16/2018 1:57 | 0.1 | -10.7 | 3   | 19.3 | 4.4 | 4.3 | 0.0489 | 3.7 |
| 4/16/2018 1:58 | 0.1 | -10.8 | 1.8 | 19.2 | 4.4 | 4.3 | 0.0343 | 3.8 |
| 4/16/2018 1:59 | 0   | -10.6 | 2.8 | 19.2 | 4.5 | 4.3 | 0.0443 | 3.8 |
| 4/16/2018 2:00 | 0   | -10.3 | 3.1 | 19.4 | 4.5 | 4.3 | 0.0414 | 3.9 |
| 4/16/2018 2:01 | 0   | -10.4 | 3.9 | 19.2 | 4.4 | 4.3 | 0.0323 | 3.9 |
| 4/16/2018 2:02 | 0.1 | -10.7 | 3.2 | 19.2 | 4.3 | 4.3 | 0.0469 | 3.9 |
| 4/16/2018 2:03 | 0.1 | -10.3 | 3   | 18.9 | 4.3 | 4.3 | 0.0365 | 4   |
| 4/16/2018 2:04 | 0.1 | -10.2 | 2   | 19.2 | 4.3 | 4.4 | 0.045  | 4.1 |
| 4/16/2018 2:05 | 0.1 | -10   | 2.4 | 18.9 | 4.3 | 4.4 | 0.0505 | 3.9 |
| 4/16/2018 2:06 | 0.1 | -9.6  | 1.9 | 19.1 | 4.3 | 4.4 | 0.0353 | 3.8 |
| 4/16/2018 2:07 | 0.1 | -9.5  | 3.7 | 19.3 | 4.3 | 4.4 | 0.0489 | 3.9 |
| 4/16/2018 2:08 | 0.1 | -10.1 | 1.4 | 19.5 | 4.3 | 4.4 | 0.0265 | 4   |
| 4/16/2018 2:09 | 0.1 | -10.4 | 3   | 19.3 | 4.3 | 4.4 | 0.0387 | 4   |
| 4/16/2018 2:10 | 0.1 | -10.6 | 2.8 | 19.3 | 4.3 | 4.4 | 0.0427 | 4   |
| 4/16/2018 2:11 | 0.1 | -10.8 | 1.7 | 19.3 | 4.3 | 4.4 | 0.0384 | 4.1 |
| 4/16/2018 2:12 | 0.1 | -10.5 | 1.7 | 19.3 | 4.3 | 4.4 | 0.0481 | 4.2 |
| 4/16/2018 2:13 | 0.1 | -10.3 | 1   | 18.8 | 4.3 | 4.4 | 0.036  | 4.2 |
| 4/16/2018 2:14 | 0.1 | -10   | 1.6 | 19.1 | 4.3 | 4.4 | 0.0486 | 4.2 |
| 4/16/2018 2:15 | 0.1 | -10.8 | 3.1 | 19.3 | 4.3 | 4.4 | 0.0431 | 4.3 |
| 4/16/2018 2:16 | 0.1 | -10.2 | 1.9 | 18.9 | 4.3 | 4.4 | 0.0362 | 4.3 |
| 4/16/2018 2:17 | 0.1 | -11.2 | 2.1 | 19.1 | 4.3 | 4.4 | 0.0484 | 4.3 |
| 4/16/2018 2:18 | 0.1 | -10.1 | 2.6 | 19.2 | 4.3 | 4.4 | 0.0351 | 4.3 |

|                |      |       |     |      |     |     |        |     |
|----------------|------|-------|-----|------|-----|-----|--------|-----|
| 4/16/2018 2:19 | 0.1  | -10.3 | 2.6 | 19.2 | 4.3 | 4.3 | 0.0446 | 3.9 |
| 4/16/2018 2:20 | 0.1  | -9.7  | 1.5 | 18.9 | 4.2 | 4.3 | 0.0381 | 3.6 |
| 4/16/2018 2:21 | 0.1  | -9.1  | 2.2 | 18.9 | 4.3 | 4.3 | 0.0393 | 3.8 |
| 4/16/2018 2:22 | 0.2  | -9.6  | 2.4 | 19.3 | 4.3 | 4.3 | 0.0449 | 3.8 |
| 4/16/2018 2:23 | 0.1  | -9.9  | 2   | 19   | 4.3 | 4.3 | 0.0342 | 4   |
| 4/16/2018 2:24 | 0    | -10.6 | 2.7 | 19.1 | 4.3 | 4.3 | 0.0566 | 4.1 |
| 4/16/2018 2:25 | -0.1 | -10.9 | 2.4 | 19.2 | 4.3 | 4.3 | 0.0425 | 4.2 |
| 4/16/2018 2:26 | -0.1 | -9.8  | 3.2 | 19.3 | 4.3 | 4.3 | 0.0467 | 4.2 |
| 4/16/2018 2:27 | -0.1 | -9.9  | 2.1 | 19.4 | 4.2 | 4.3 | 0.0404 | 4.2 |
| 4/16/2018 2:28 | -0.1 | -10.2 | 2.3 | 19.2 | 4.2 | 4.3 | 0.0366 | 4.2 |
| 4/16/2018 2:29 | -0.1 | -9.3  | 3   | 19.2 | 4.2 | 4.3 | 0.0421 | 4.2 |
| 4/16/2018 2:30 | 0    | -10.2 | 3.3 | 19.1 | 4.2 | 4.3 | 0.033  | 4.2 |
| 4/16/2018 2:31 | 0    | -10   | 2   | 19.1 | 4.2 | 4.3 | 0.0415 | 4.1 |
| 4/16/2018 2:32 | 0    | -10.1 | 2.1 | 19   | 4.2 | 4.3 | 0.0437 | 4.1 |
| 4/16/2018 2:33 | -0.1 | -10   | 2   | 19.4 | 4.2 | 4.3 | 0.0362 | 4.1 |
| 4/16/2018 2:34 | -0.1 | -9.9  | 1.9 | 19   | 4.2 | 4.3 | 0.0415 | 4.1 |
| 4/16/2018 2:35 | -0.1 | -10.2 | 1.9 | 19   | 4.2 | 4.3 | 0.038  | 4.1 |
| 4/16/2018 2:36 | -0.1 | -9.7  | 2   | 19.1 | 4.2 | 4.3 | 0.0385 | 4   |
| 4/16/2018 2:37 | 0    | -9.4  | 2.3 | 19.3 | 4.1 | 4.3 | 0.0407 | 4   |
| 4/16/2018 2:38 | 0    | -10.1 | 1.6 | 19.1 | 4.2 | 4.3 | 0.0368 | 3.4 |
| 4/16/2018 2:39 | 0    | -10.3 | 2   | 19.3 | 4.1 | 4.3 | 0.0424 | 3.1 |
| 4/16/2018 2:40 | 0    | -9.3  | 3.2 | 19.2 | 4.2 | 4.3 | 0.0363 | 3.2 |
| 4/16/2018 2:41 | 0    | -9.4  | 1.9 | 19.1 | 4.1 | 4.3 | 0.039  | 3.3 |
| 4/16/2018 2:42 | 0.1  | -9.5  | 2.4 | 19.1 | 4.1 | 4.3 | 0.0389 | 3.3 |
| 4/16/2018 2:43 | 0.2  | -9.6  | 2.9 | 19.4 | 4.2 | 4.3 | 0.037  | 3.5 |
| 4/16/2018 2:44 | 0.2  | -10.3 | 1.6 | 19   | 4.2 | 4.3 | 0.0366 | 3.8 |
| 4/16/2018 2:45 | 0.2  | -9.7  | 2.4 | 19.2 | 4.1 | 4.3 | 0.0291 | 3.9 |
| 4/16/2018 2:46 | 0.2  | -9.4  | 2   | 19.3 | 4.1 | 4.3 | 0.0443 | 3.9 |
| 4/16/2018 2:47 | 0.2  | -9    | 1.8 | 19.2 | 4   | 4.3 | 0.0393 | 3.9 |
| 4/16/2018 2:48 | 0.2  | -9.7  |     | 19   | 4.1 | 4.3 | 0.0359 | 4   |
| 4/16/2018 2:49 | 0.2  | -9.4  |     | 19.3 | 4   | 4.3 | 0.0448 | 4   |
| 4/16/2018 2:50 | 0.2  | -9.3  |     | 19.3 | 4.1 | 4.3 | 0.033  | 4   |
| 4/16/2018 2:51 | 0.1  | -9.5  | 8.3 | 19.1 | 4.1 | 4.3 | 0.0481 | 4   |
| 4/16/2018 2:52 | 0.1  | -9.7  |     | 19.2 | 4.2 | 4.3 | 0.0308 | 4.1 |
| 4/16/2018 2:53 | 0.1  | -9.4  |     | 19   | 4   | 4.3 | 0.0516 | 4.1 |
| 4/16/2018 2:54 | 0.2  | -9.6  | 3.1 | 19.1 | 4.1 | 4.3 | 0.0294 | 4   |
| 4/16/2018 2:55 | 0.2  | -10.2 | 1.8 | 19.3 | 4.1 | 4.3 | 0.0304 | 4   |
| 4/16/2018 2:56 | 0.2  | -9.9  | 3.7 | 19.1 | 4.1 | 4.3 | 0.0476 | 3.9 |
| 4/16/2018 2:57 | 0.1  | -9.5  | 1.5 | 19.3 | 4.1 | 4.3 | 0.0249 | 4   |
| 4/16/2018 2:58 | 0.1  | -9.7  | 2.9 | 19.1 | 4   | 4.2 | 0.0471 | 4   |
| 4/16/2018 2:59 | 0.2  | -9.3  | 2.9 | 19.1 | 4   | 4.3 | 0.0361 | 4.1 |
| 4/16/2018 3:00 | 0.1  | -10.1 | 2.1 | 19   | 4.1 | 4.3 | 0.038  | 4   |
| 4/16/2018 3:01 | 0.2  | -10   | 2   | 19.3 | 4.1 | 4.3 | 0.0464 | 4.1 |
| 4/16/2018 3:02 | 0.1  | -9.9  | 1.8 | 19.1 | 4.1 | 4.3 | 0.0278 | 4.1 |
| 4/16/2018 3:03 | 0.2  | -8.8  | 3.6 | 19.1 | 4.1 | 4.3 | 0.0493 | 4.1 |
| 4/16/2018 3:04 | 0.2  | -9.4  | 2.1 | 19.1 | 4.1 | 4.2 | 0.0267 | 4.1 |
| 4/16/2018 3:05 | 0.2  | -8.7  | 1.9 | 19   | 4   | 4.2 | 0.0446 | 4.1 |

|                |     |      |     |      |     |     |        |     |
|----------------|-----|------|-----|------|-----|-----|--------|-----|
| 4/16/2018 3:06 | 0.2 | -9.3 | 1.5 | 19.1 | 4.1 | 4.2 | 0.0438 | 4.1 |
| 4/16/2018 3:07 | 0.2 | -9.2 | 1.8 | 19.1 | 4.1 | 4.2 | 0.0329 | 4.2 |
| 4/16/2018 3:08 | 0.2 | -9.1 | 2.3 | 19.1 | 4.1 | 4.2 | 0.0443 | 4.2 |
| 4/16/2018 3:09 | 0.2 | -9.8 | 2.2 | 19.1 | 4   | 4.2 | 0.0317 | 4.3 |
| 4/16/2018 3:10 | 0.2 | -9.3 | 1.7 | 19.2 | 4.1 | 4.2 | 0.0454 | 4.3 |
| 4/16/2018 3:11 | 0.2 | -8.8 | 3.1 | 19.3 | 4   | 4.2 | 0.0361 | 4.2 |
| 4/16/2018 3:12 | 0.3 | -9.5 | 1.2 | 19.1 | 4.1 | 4.2 | 0.0353 | 4.2 |
| 4/16/2018 3:13 | 0.3 | -9.3 | 1.1 | 19.1 | 4   | 4.2 | 0.0406 | 4.2 |
| 4/16/2018 3:14 | 0.3 | -9.2 | 1.7 | 19.2 | 4.1 | 4.2 | 0.0251 | 4.1 |
| 4/16/2018 3:15 | 0.3 | -9.3 | 1.9 | 19.3 | 4.1 | 4.2 | 0.0351 | 4.2 |
| 4/16/2018 3:16 | 0.3 | -9.1 | 2.5 | 19   | 4.1 | 4.2 | 0.0417 | 4.4 |
| 4/16/2018 3:17 | 0.3 | -10  | 2.4 | 19.3 | 4   | 4.2 | 0.0327 | 4.4 |
| 4/16/2018 3:18 | 0.3 | -9.2 | 3.7 | 19.4 | 4   | 4.2 | 0.042  | 4.4 |
| 4/16/2018 3:19 | 0.3 | -9.2 | 1.4 | 19.6 | 4   | 4.2 | 0.0317 | 4.5 |
| 4/16/2018 3:20 | 0.2 | -8.7 | 3   | 19.2 | 4   | 4.2 | 0.0471 | 4.5 |
| 4/16/2018 3:21 | 0.2 | -10  | 1.6 | 19.3 | 4   | 4.2 | 0.0373 | 4.5 |
| 4/16/2018 3:22 | 0.3 | -9.6 | 1.3 | 19.1 | 4   | 4.2 | 0.0347 | 4.5 |
| 4/16/2018 3:23 | 0.2 | -9.2 | 2.7 | 19.3 | 4   | 4.2 | 0.0437 | 4.5 |
| 4/16/2018 3:24 | 0.2 | -8.9 | 2.6 | 19.2 | 4   | 4.2 | 0.0254 | 4.5 |
| 4/16/2018 3:25 | 0.2 | -9   | 2.6 | 19.2 | 3.9 | 4.2 | 0.0447 | 4.5 |
| 4/16/2018 3:26 | 0.2 | -9.4 | 2.1 | 19.1 | 3.9 | 4.2 | 0.0319 | 4.5 |
| 4/16/2018 3:27 | 0.3 | -9.1 | 3.2 | 19.2 | 4   | 4.2 | 0.0396 | 4.5 |
| 4/16/2018 3:28 | 0.3 | -9   | 2.2 | 19   | 4   | 4.2 | 0.0396 | 4.5 |
| 4/16/2018 3:29 | 0.2 | -9.2 | 1.3 | 19.4 | 4   | 4.2 | 0.0357 | 4.5 |
| 4/16/2018 3:30 | 0.2 | -8.9 | 3.2 | 19.1 | 4   | 4.2 | 0.0441 | 4.5 |
| 4/16/2018 3:31 | 0.2 | -9.5 | 3.4 | 19.2 | 3.9 | 4.2 | 0.0327 | 4.6 |
| 4/16/2018 3:32 | 0.2 | -9.2 | 1.9 | 19   | 3.9 | 4.2 | 0.0402 | 4.5 |
| 4/16/2018 3:33 | 0.2 | -9.2 | 3.6 | 19.2 | 3.9 | 4.2 | 0.0376 | 4.5 |
| 4/16/2018 3:34 | 0.2 | -8.4 | 3.1 | 19.3 | 3.9 | 4.2 | 0.048  | 4.4 |
| 4/16/2018 3:35 | 0.2 | -8.5 | 1.7 | 19.4 | 3.9 | 4.2 | 0.0438 | 4.5 |
| 4/16/2018 3:36 | 0.2 | -8.7 | 2.8 | 19.1 | 3.9 | 4.2 | 0.033  | 4.6 |
| 4/16/2018 3:37 | 0.2 | -9.2 | 2.2 | 19   | 4   | 4.2 | 0.0435 | 4.7 |
| 4/16/2018 3:38 | 0.2 | -8.5 | 2   | 19.4 | 3.9 | 4.2 | 0.0281 | 4.8 |
| 4/16/2018 3:39 | 0.2 | -8.8 | 2.1 | 19.1 | 3.9 | 4.2 | 0.0376 | 4.7 |
| 4/16/2018 3:40 | 0.2 | -8.3 | 3   | 19.3 | 3.9 | 4.2 | 0.0311 | 4.8 |
| 4/16/2018 3:41 | 0.2 | -8.3 | 2   | 19.1 | 3.9 | 4.2 | 0.0385 | 4.8 |
| 4/16/2018 3:42 | 0.2 | -8.5 | 1.5 | 19.4 | 3.9 | 4.2 | 0.0428 | 4.7 |
| 4/16/2018 3:43 | 0.2 | -8.8 | 3.3 | 19.3 | 3.9 | 4.2 | 0.0347 | 4.7 |
| 4/16/2018 3:44 | 0.2 | -8.5 | 3.5 | 19   | 3.9 | 4.2 | 0.0537 | 4.6 |
| 4/16/2018 3:45 | 0.2 | -8.9 | 3.3 | 19.2 | 3.9 | 4.2 | 0.025  | 4.7 |
| 4/16/2018 3:46 | 0.2 | -9.4 | 2.7 | 19.4 | 3.9 | 4.2 | 0.0425 | 4.8 |
| 4/16/2018 3:47 | 0.2 | -8.4 | 1.9 | 19.1 | 3.9 | 4.2 | 0.0352 | 4.8 |
| 4/16/2018 3:48 | 0.3 | -8.8 | 2.1 | 19.2 | 3.9 | 4.2 | 0.0408 | 4.7 |
| 4/16/2018 3:49 | 0.3 | -9.1 | 2.4 | 19.4 | 3.9 | 4.1 | 0.0436 | 4.7 |
| 4/16/2018 3:50 | 0.2 | -8.5 | 1.8 | 19.2 | 3.9 | 4.1 | 0.03   | 4.8 |
| 4/16/2018 3:51 | 0.2 | -9.3 | 3.1 | 19.5 | 3.9 | 4.1 | 0.0454 | 4.8 |
| 4/16/2018 3:52 | 0.2 | -8.9 | 2.4 | 19.4 | 3.8 | 4.1 | 0.0277 | 4.9 |

|                |     |      |     |      |     |     |        |     |
|----------------|-----|------|-----|------|-----|-----|--------|-----|
| 4/16/2018 3:53 | 0.2 | -8.8 | 3.2 | 19.3 | 3.9 | 4.1 | 0.0348 | 4.8 |
| 4/16/2018 3:54 | 0.2 | -8.3 | 2.4 | 19   | 3.9 | 4.1 | 0.0401 | 4.9 |
| 4/16/2018 3:55 | 0.2 | -8.5 | 1.9 | 19   | 3.9 | 4.1 | 0.0282 | 5   |
| 4/16/2018 3:56 | 0.2 | -8.7 | 1.3 | 19.1 | 3.9 | 4.1 | 0.043  | 5   |
| 4/16/2018 3:57 | 0.2 | -8.3 | 3.5 | 19.4 | 3.9 | 4.2 | 0.0307 | 5.1 |
| 4/16/2018 3:58 | 0.2 | -8.1 | 1.5 | 19.3 | 3.9 | 4.2 | 0.0412 | 5   |
| 4/16/2018 3:59 | 0.2 | -8.6 | 2.5 | 19   | 3.8 | 4.2 | 0.0356 | 5   |
| 4/16/2018 4:00 | 0.2 | -8.8 | 2.1 | 19.1 | 3.9 | 4.2 | 0.0346 | 5.1 |
| 4/16/2018 4:01 | 0.2 | -8.4 | 2.1 | 19.1 | 3.8 | 4.1 | 0.0435 | 5.1 |
| 4/16/2018 4:02 | 0.2 | -8.4 | 1.3 | 19.3 | 3.8 | 4.1 | 0.0317 | 4.8 |
| 4/16/2018 4:03 | 0.2 | -8   | 2.2 | 19.1 | 3.8 | 4.2 | 0.0446 | 5   |
| 4/16/2018 4:04 | 0.2 | -8.9 | 2.6 | 19   | 3.8 | 4.1 | 0.0267 | 5.1 |
| 4/16/2018 4:05 | 0.2 | -8.9 | 2.5 | 19.1 | 3.8 | 4.1 | 0.04   | 5.1 |
| 4/16/2018 4:06 | 0.2 | -8.4 | 1.7 | 19.2 | 3.9 | 4.1 | 0.0402 | 5   |
| 4/16/2018 4:07 | 0.1 | -9.1 | 0.8 | 19.2 | 3.9 | 4.1 | 0.0309 | 4.9 |
| 4/16/2018 4:08 | 0.1 | -8.6 | 2.8 | 19.5 | 3.9 | 4.1 | 0.0454 | 4.9 |
| 4/16/2018 4:09 | 0.1 | -8.4 | 0.8 | 19.3 | 3.9 | 4.1 | 0.0206 | 5   |
| 4/16/2018 4:10 | 0.1 | -8.6 | 3   | 19.2 | 3.9 | 4.1 | 0.0416 | 5   |
| 4/16/2018 4:11 | 0.1 | -8.3 | 2.5 | 19.3 | 3.8 | 4.1 | 0.0238 | 5.1 |
| 4/16/2018 4:12 | 0.1 | -8.2 | 2.9 | 19.2 | 3.8 | 4.1 | 0.0302 | 5.1 |
| 4/16/2018 4:13 | 0.2 | -8.8 | 2.3 | 19.3 | 3.8 | 4.1 | 0.0366 | 5.1 |
| 4/16/2018 4:14 | 0.2 | -7.9 | 4.5 | 19.3 | 3.8 | 4.1 | 0.0319 | 5   |
| 4/16/2018 4:15 | 0.2 | -8.4 | 1.7 | 19.4 | 3.8 | 4.1 | 0.0456 | 4   |
| 4/16/2018 4:16 | 0.1 | -8.4 | 2.5 | 19.5 | 3.9 | 4.1 | 0.025  | 4   |
| 4/16/2018 4:17 | 0.1 | -8.7 | 1.7 | 19.3 | 3.9 | 4.1 | 0.0407 | 4.3 |
| 4/16/2018 4:18 | 0.1 | -8.4 | 2.8 | 19.5 | 3.9 | 4.1 | 0.0307 | 4.5 |
| 4/16/2018 4:19 | 0.1 | -8.2 | 3.2 | 19.3 | 3.8 | 4.1 | 0.0382 | 4.7 |
| 4/16/2018 4:20 | 0.2 | -8.6 | 2.2 | 19.4 | 3.8 | 4.1 | 0.0385 | 4.8 |
| 4/16/2018 4:21 | 0.1 | -8.3 | 2.9 | 19.2 | 3.9 | 4.1 | 0.0208 | 4.8 |
| 4/16/2018 4:22 | 0.1 | -8.9 | 3   | 19.3 | 3.8 | 4.1 | 0.0398 | 4.8 |
| 4/16/2018 4:23 | 0.1 | -7.9 | 2.9 | 19.2 | 3.8 | 4.1 | 0.0259 | 4.9 |
| 4/16/2018 4:24 | 0.2 | -8.5 | 2.3 | 19.5 | 3.9 | 4.1 | 0.0392 | 4.9 |
| 4/16/2018 4:25 | 0.2 | -7.7 | 2.7 | 19.4 | 3.8 | 4   | 0.0363 | 5   |
| 4/16/2018 4:26 | 0.2 | -8.5 | 2.2 | 19.3 | 3.9 | 4   | 0.0309 | 5   |
| 4/16/2018 4:27 | 0.2 | -8.6 | 2.7 | 19.3 | 3.9 | 4   | 0.0357 | 4.9 |
| 4/16/2018 4:28 | 0.3 | -7.9 | 2.9 | 19.3 | 3.9 | 4   | 0.0229 | 4.9 |
| 4/16/2018 4:29 | 0.3 | -8.4 | 2.7 | 19.4 | 3.8 | 4   | 0.0334 | 5   |
| 4/16/2018 4:30 | 0.3 | -8.7 | 2.2 | 19.3 | 3.8 | 4   | 0.0251 | 4.9 |
| 4/16/2018 4:31 | 0.2 | -8.8 | 1.5 | 19.4 | 3.8 | 4   | 0.0309 | 4.5 |
| 4/16/2018 4:32 | 0.2 | -8.3 | 2.9 | 19.2 | 3.9 | 3.9 | 0.0365 | 4.4 |
| 4/16/2018 4:33 | 0.2 | -8.8 | 3   | 19.6 | 3.8 | 4   | 0.0273 | 4.4 |
| 4/16/2018 4:34 | 0.2 | -8   | 1.8 | 19.4 | 3.8 | 4   | 0.0365 | 4.3 |
| 4/16/2018 4:35 | 0.2 | -8.2 | 2   | 19.1 | 3.8 | 4   | 0.0224 | 4.2 |
| 4/16/2018 4:36 | 0.2 | -7.9 | 1.7 | 19.8 | 3.8 | 4   | 0.0402 | 4.1 |
| 4/16/2018 4:37 | 0.2 | -7.5 | 2.1 | 19.4 | 3.9 | 4   | 0.0319 | 4.1 |
| 4/16/2018 4:38 | 0.2 | -8.3 | 2.3 | 19.4 | 3.9 | 4   | 0.0318 | 4.2 |
| 4/16/2018 4:39 | 0.2 | -7.5 | 3.2 | 19.1 | 3.8 | 4   | 0.0358 | 4.3 |

|                |     |      |     |      |     |     |        |     |
|----------------|-----|------|-----|------|-----|-----|--------|-----|
| 4/16/2018 4:40 | 0.2 | -7.7 | 3.5 | 19.4 | 3.9 | 4   | 0.0273 | 4.4 |
| 4/16/2018 4:41 | 0.1 | -7.8 | 2.3 | 19.6 | 3.9 | 4   | 0.0326 | 4.4 |
| 4/16/2018 4:42 | 0.1 | -8.5 | 2.1 | 19.3 | 3.8 | 4   | 0.0216 | 4.4 |
| 4/16/2018 4:43 | 0.1 | -8   | 0.7 | 19.5 | 3.8 | 4   | 0.0286 | 4.4 |
| 4/16/2018 4:44 | 0.1 | -8.2 | 1.7 | 19.2 | 3.8 | 4   | 0.03   | 4.5 |
| 4/16/2018 4:45 | 0.1 | -7.4 | 0.8 | 19.5 | 3.9 | 4   | 0.029  | 4.5 |
| 4/16/2018 4:46 | 0.1 | -8.1 | 2.2 | 19.5 | 3.8 | 4   | 0.0356 | 4.5 |
| 4/16/2018 4:47 | 0.1 | -8.1 | 2.6 | 19.3 | 3.8 | 4   | 0.0153 | 4.5 |
| 4/16/2018 4:48 | 0.1 | -7.7 | 2.8 | 19.6 | 3.9 | 3.9 | 0.0326 | 4.5 |
| 4/16/2018 4:49 | 0.1 | -7.6 | 2   | 19.4 | 3.9 | 3.9 | 0.0219 | 4.5 |
| 4/16/2018 4:50 | 0.1 | -7.4 | 0.7 | 19.4 | 3.9 | 3.9 | 0.0262 | 4.5 |
| 4/16/2018 4:51 | 0.2 | -8   | 3.3 | 19.4 | 3.8 | 3.9 | 0.0379 | 4.5 |
| 4/16/2018 4:52 | 0.2 | -8.3 | 3.6 | 19.7 | 3.9 | 3.9 | 0.02   | 4.6 |
| 4/16/2018 4:53 | 0.2 | -8.1 | 4.3 | 19.1 | 3.9 | 3.9 | 0.0306 | 4.7 |
| 4/16/2018 4:54 | 0.3 | -7.8 | 2.1 | 19.4 | 3.9 | 3.9 | 0.021  | 4.8 |
| 4/16/2018 4:55 | 0.3 | -7.8 | 1.9 | 19.6 | 3.9 | 3.9 | 0.0374 | 4.8 |
| 4/16/2018 4:56 | 0.3 | -7.9 | 2.7 | 19.6 | 3.9 | 3.9 | 0.0293 | 4.9 |
| 4/16/2018 4:57 | 0.3 | -8   | 2.9 | 19.7 | 3.9 | 3.9 | 0.0253 | 4.8 |
| 4/16/2018 4:58 | 0.2 | -8   | 2.2 | 19.7 | 3.9 | 3.9 | 0.0338 | 4.8 |
| 4/16/2018 4:59 | 0.2 | -7.6 | 2.5 | 19.6 | 4   | 3.9 | 0.0174 | 4.7 |
| 4/16/2018 5:00 | 0.2 | -8.3 | 2   | 19.3 | 3.9 | 3.8 | 0.035  | 4.7 |
| 4/16/2018 5:01 | 0.2 | -7.4 | 2.3 | 19.3 | 3.9 | 3.8 | 0.0248 | 4.8 |
| 4/16/2018 5:02 | 0.2 | -7.3 | 2   | 19.8 | 3.9 | 3.8 | 0.0278 | 4.6 |
| 4/16/2018 5:03 | 0.2 | -7.9 | 2.1 | 19.4 | 3.9 | 3.8 | 0.0259 | 4.5 |
| 4/16/2018 5:04 | 0.2 | -7.8 | 3.9 | 19.7 | 3.9 | 3.8 | 0.0198 | 3.9 |
| 4/16/2018 5:05 | 0.2 | -7.8 | 3.1 | 19.6 | 4   | 3.8 | 0.0322 | 4.2 |
| 4/16/2018 5:06 | 0.2 | -8   | 2.3 | 19.6 | 4   | 3.8 | 0.0229 | 4.5 |
| 4/16/2018 5:07 | 0.2 | -7.9 | 2.6 | 19.4 | 4   | 3.8 | 0.0328 | 4.6 |
| 4/16/2018 5:08 | 0.2 | -7.8 | 3.6 | 19.6 | 4   | 3.8 | 0.0219 | 4.8 |
| 4/16/2018 5:09 | 0.2 | -8   | 2   | 19.5 | 4   | 3.8 | 0.0238 | 4.8 |
| 4/16/2018 5:10 | 0.2 | -7.8 | 2.1 | 19.5 | 4   | 3.8 | 0.0327 | 4.8 |
| 4/16/2018 5:11 | 0.2 | -8.4 | 2.6 | 19.6 | 4   | 3.8 | 0.0208 | 4.8 |
| 4/16/2018 5:12 | 0.2 | -8.5 | 3.5 | 19.4 | 4.1 | 3.8 | 0.0329 | 4.8 |
| 4/16/2018 5:13 | 0.2 | -7.9 | 3.1 | 19.4 | 4   | 3.8 | 0.0182 | 4.9 |
| 4/16/2018 5:14 | 0.1 | -7.1 | 3.1 | 19.5 | 4.1 | 3.8 | 0.0311 | 4.9 |
| 4/16/2018 5:15 | 0.1 | -7.7 | 2.4 | 19.5 | 4.1 | 3.8 | 0.0244 | 4.9 |
| 4/16/2018 5:16 | 0.1 | -7.5 | 2.9 | 19.8 | 4.1 | 3.8 | 0.0269 | 4.8 |
| 4/16/2018 5:17 | 0.1 | -7.8 | 2.3 | 19.5 | 4.1 | 3.8 | 0.0319 | 4.8 |
| 4/16/2018 5:18 | 0.2 | -7.5 | 2   | 19.6 | 4.2 | 3.8 | 0.0226 | 4.9 |
| 4/16/2018 5:19 | 0.2 | -7.7 | 1.4 | 19.6 | 4.2 | 3.8 | 0.0375 | 4.8 |
| 4/16/2018 5:20 | 0.2 | -8.2 | 3.3 | 19.6 | 4.2 | 3.8 | 0.0216 | 4.8 |
| 4/16/2018 5:21 | 0.2 | -8   | 2   | 19.5 | 4.2 | 3.7 | 0.0347 | 4.8 |
| 4/16/2018 5:22 | 0.1 | -7.4 | 2.4 | 19.7 | 4.2 | 3.7 | 0.0347 | 4.8 |
| 4/16/2018 5:23 | 0.1 | -7.4 | 2.7 | 19.5 | 4.2 | 3.7 | 0.0163 | 4.8 |
| 4/16/2018 5:24 | 0.1 | -8   | 2.8 | 19.6 | 4.2 | 3.7 | 0.0226 | 4.8 |
| 4/16/2018 5:25 | 0.1 | -8   | 1.8 | 19.8 | 4.3 | 3.7 | 0.0119 | 4.9 |
| 4/16/2018 5:26 | 0.1 | -7.7 | 4   | 20.1 | 4.3 | 3.7 | 0.0273 | 4.9 |

|                |     |      |     |      |     |     |        |     |
|----------------|-----|------|-----|------|-----|-----|--------|-----|
| 4/16/2018 5:27 | 0.1 | -7.8 | 2.7 | 19.9 | 4.3 | 3.7 | 0.02   | 4.9 |
| 4/16/2018 5:28 | 0.1 | -7.5 | 2.8 | 20   | 4.2 | 3.7 | 0.0248 | 4.9 |
| 4/16/2018 5:29 | 0.1 | -6.8 | 2.9 | 19.9 | 4.3 | 3.7 | 0.0192 | 4.8 |
| 4/16/2018 5:30 | 0.1 | -6.8 | 2.7 | 20   | 4.3 | 3.7 | 0.0244 | 4.7 |
| 4/16/2018 5:31 | 0.1 | -7.7 | 2   | 19.8 | 4.4 | 3.7 | 0.0272 | 4.7 |
| 4/16/2018 5:32 | 0.1 | -7.6 | 2.6 | 20.1 | 4.4 | 3.6 | 0.0209 | 4.7 |
| 4/16/2018 5:33 | 0.1 | -7.3 | 2.7 | 20.4 | 4.5 | 3.6 | 0.0236 | 4.7 |
| 4/16/2018 5:34 | 0.1 | -7.7 | 1.6 | 20.2 | 4.5 | 3.6 | 0.0195 | 4.8 |
| 4/16/2018 5:35 | 0   | -8.1 | 2.3 | 20.4 | 4.6 | 3.6 | 0.0148 | 4.7 |
| 4/16/2018 5:36 | 0   | -7.5 | 2   | 20.4 | 4.5 | 3.5 | 0.0252 | 4.6 |
| 4/16/2018 5:37 | 0.1 | -7.6 |     | 20.5 | 4.6 | 3.5 | 0.0029 | 4.6 |
| 4/16/2018 5:38 | 0.1 | -7.8 |     | 20.1 | 4.5 | 3.5 | 0.0257 | 4.5 |
| 4/16/2018 5:39 | 0.1 | -7.3 | 9.4 | 20.3 | 4.5 | 3.5 | 0.021  | 4.6 |
| 4/16/2018 5:40 | 0   | -6.9 |     | 20.1 | 4.4 | 3.5 | 0.0257 | 4.6 |
| 4/16/2018 5:41 | 0   | -7.8 | 1.9 | 20   | 4.4 | 3.5 | 0.0171 | 4.5 |
| 4/16/2018 5:42 | 0   | -7.7 | 6.3 | 20   | 4.4 | 3.5 | 0.0106 | 4.5 |
| 4/16/2018 5:43 | 0.1 | -7.6 |     | 20.1 | 4.4 | 3.5 | 0.0227 | 4.5 |
| 4/16/2018 5:44 | 0   | -7.5 | 5   | 20   | 4.4 | 3.5 | 0.0158 | 4.6 |
| 4/16/2018 5:45 | 0   | -7.4 |     | 20.2 | 4.5 | 3.5 | 0.0199 | 4.4 |
| 4/16/2018 5:46 | 0   | -7.5 | 3   | 19.9 | 4.5 | 3.5 | 0.0215 | 4.6 |
| 4/16/2018 5:47 | 0   | -7.5 | 2.5 | 19.7 | 4.4 | 3.5 | 0.0185 | 4.6 |
| 4/16/2018 5:48 | 0.1 | -7.8 | 2.9 | 19.8 | 4.4 | 3.5 | 0.0237 | 4.6 |
| 4/16/2018 5:49 | 0.1 | -7.9 | 3.1 | 20.1 | 4.4 | 3.5 | 0.0118 | 4.6 |
| 4/16/2018 5:50 | 0.1 | -7.7 | 1.4 | 19.9 | 4.4 | 3.4 | 0.0197 | 3.9 |
| 4/16/2018 5:51 | 0.1 | -7.1 | 1.4 | 20.1 | 4.4 | 3.4 | 0.0091 | 2.7 |
| 4/16/2018 5:52 | 0.1 | -7.4 | 3.2 | 19.7 | 4.4 | 3.4 | 0.0237 | 3   |
| 4/16/2018 5:53 | 0.1 | -7.7 | 2   | 20   | 4.4 | 3.4 | 0.0138 | 3.6 |
| 4/16/2018 5:54 | 0.1 | -8.3 | 2.4 | 19.8 | 4.4 | 3.4 | 0.0171 | 3.9 |
| 4/16/2018 5:55 | 0.2 | -7.8 | 2.7 | 19.9 | 4.4 | 3.4 | 0.023  | 4.2 |
| 4/16/2018 5:56 | 0.2 | -7.5 | 1.7 | 19.6 | 4.4 | 3.4 | 0.008  | 4.3 |
| 4/16/2018 5:57 | 0.2 | -7.3 | 2   | 19.4 | 4.4 | 3.4 | 0.0225 | 4.5 |
| 4/16/2018 5:58 | 0.1 | -7.7 | 3.8 | 20   | 4.5 | 3.4 | 0.0019 | 4.6 |
| 4/16/2018 5:59 | 0.2 | -6.9 | 2.2 | 20.1 | 4.5 | 3.4 | 0.0219 | 4.7 |
| 4/16/2018 6:00 | 0.2 | -7.2 | 1.3 | 20   | 4.4 | 3.4 | 0.0079 | 4.6 |
| 4/16/2018 6:01 | 0.2 | -8   | 2   | 19.8 | 4.4 | 3.4 | 0.0155 | 4.5 |
| 4/16/2018 6:02 | 0.2 | -7.7 | 3   | 20.1 | 4.4 | 3.4 | 0.026  | 4.4 |
| 4/16/2018 6:03 | 0.2 | -7.7 | 2.9 | 19.8 | 4.4 | 3.4 | 0.0097 | 4.5 |
| 4/16/2018 6:04 | 0.2 | -7.2 | 3.2 | 19.9 | 4.4 | 3.4 | 0.019  | 4.5 |
| 4/16/2018 6:05 | 0.1 | -7.6 | 3.7 | 19.8 | 4.4 | 3.4 | 0.0069 | 4.5 |
| 4/16/2018 6:06 | 0.1 | -7   | 2.7 | 19.8 | 4.4 | 3.4 | 0.0197 | 4.5 |
| 4/16/2018 6:07 | 0.1 | -7.5 | 2.1 | 19.7 | 4.4 | 3.4 | 0.0173 | 4.7 |
| 4/16/2018 6:08 | 0.2 | -7.4 | 3.3 | 19.7 | 4.4 | 3.4 | 0.0143 | 4.6 |
| 4/16/2018 6:09 | 0.2 | -7.6 | 3.1 | 19.7 | 4.4 | 3.4 | 0.0118 | 4.7 |
| 4/16/2018 6:10 | 0.1 | -7.2 | 1.1 | 19.6 | 4.4 | 3.4 | 0.0126 | 4.7 |
| 4/16/2018 6:11 | 0.1 | -7.7 | 1.7 | 19.6 | 4.4 | 3.4 | 0.027  | 4.8 |
| 4/16/2018 6:12 | 0.1 | -7.4 | 3.3 | 19.5 | 4.3 | 3.4 | 0.0138 | 4.7 |
| 4/16/2018 6:13 | 0.1 | -7.5 | 2.3 | 19.7 | 4.3 | 3.5 | 0.0186 | 4.7 |



|                |     |      |     |      |     |     |         |     |
|----------------|-----|------|-----|------|-----|-----|---------|-----|
| 4/16/2018 6:14 | 0.2 | -7   | 1.8 | 19.5 | 4.4 | 3.5 | 0.0134  | 4.6 |
| 4/16/2018 6:15 | 0.1 | -7.3 | 2.6 | 19.6 | 4.3 | 3.5 | 0.021   | 4.1 |
| 4/16/2018 6:16 | 0.1 | -7.6 | 2.3 | 19.7 | 4.3 | 3.5 | 0.0182  | 3.9 |
| 4/16/2018 6:17 | 0.1 | -8   | 2.3 | 19.5 | 4.3 | 3.5 | 0.0123  | 3.6 |
| 4/16/2018 6:18 | 0.2 | -7.3 | 3.3 | 19.8 | 4.3 | 3.5 | 0.0279  | 3   |
| 4/16/2018 6:19 | 0.2 | -7   | 2.3 | 19.7 | 4.3 | 3.5 | 0.0054  | 3.1 |
| 4/16/2018 6:20 | 0.2 | -7.6 | 2.7 | 19.5 | 4.3 | 3.5 | 0.0289  | 3.3 |
| 4/16/2018 6:21 | 0.2 | -7.1 | 2.2 | 19.5 | 4.3 | 3.5 | 0.007   | 3.5 |
| 4/16/2018 6:22 | 0.2 | -7.3 | 3   | 19.5 | 4.3 | 3.5 | 0.0242  | 3.7 |
| 4/16/2018 6:23 | 0.2 | -7.9 | 2.7 | 19.6 | 4.3 | 3.5 | 0.0224  | 3.9 |
| 4/16/2018 6:24 | 0.2 | -7.2 | 2.3 | 19.6 | 4.3 | 3.5 | 0.0108  | 4   |
| 4/16/2018 6:25 | 0.2 | -7.9 | 1.8 | 19.9 | 4.3 | 3.5 | 0.0221  | 4.1 |
| 4/16/2018 6:26 | 0.2 | -7.1 | 2   | 19.7 | 4.2 | 3.5 | 0.0088  | 4.2 |
| 4/16/2018 6:27 | 0.2 | -7.1 | 3.6 | 19.7 | 4.3 | 3.5 | 0.0199  | 4.3 |
| 4/16/2018 6:28 | 0.2 | -6.8 | 1.1 | 19.7 | 4.3 | 3.5 | 0.0113  | 4.3 |
| 4/16/2018 6:29 | 0.2 | -7.2 | 1.7 | 19.8 | 4.2 | 3.5 | 0.0104  | 4.4 |
| 4/16/2018 6:30 | 0.2 | -7.1 | 2.2 | 19.8 | 4.2 | 3.5 | 0.0197  | 4.4 |
| 4/16/2018 6:31 | 0.2 | -7.4 | 2.1 | 19.6 | 4.2 | 3.5 | 0.009   | 4.3 |
| 4/16/2018 6:32 | 0.2 | -7.4 | 3   | 19.7 | 4.2 | 3.5 | 0.0119  | 4.2 |
| 4/16/2018 6:33 | 0.2 | -7.3 | 2.3 | 19.8 | 4.2 | 3.5 | 0.01    | 4.3 |
| 4/16/2018 6:34 | 0.2 | -7.1 | 3   | 19.7 | 4.2 | 3.5 | 0.0116  | 4.3 |
| 4/16/2018 6:35 | 0.2 | -7.2 | 2.8 | 19.7 | 4.2 | 3.5 | 0.0207  | 4.3 |
| 4/16/2018 6:36 | 0.2 | -7.7 | 3   | 19.9 | 4.2 | 3.4 | 0.0035  | 4.3 |
| 4/16/2018 6:37 | 0.2 | -7.4 | 0.7 | 19.7 | 4.2 | 3.4 | 0.0223  | 4.3 |
| 4/16/2018 6:38 | 0.2 | -8.8 | 2.4 | 19.8 | 4.2 | 3.4 | 0.0069  | 4.3 |
| 4/16/2018 6:39 | 0.2 | -7.6 | 2   | 19.7 | 4.2 | 3.4 | 0.0114  | 4.3 |
| 4/16/2018 6:40 | 0.2 | -6.7 | 4.2 | 19.9 | 4.2 | 3.4 | 0.0215  | 4.1 |
| 4/16/2018 6:41 | 0.2 | -6.9 | 2.2 | 19.7 | 4.2 | 3.4 | 0.0046  | 4.2 |
| 4/16/2018 6:42 | 0.2 | -7   | 3.7 | 19.8 | 4.2 | 3.4 | 0.0144  | 4.4 |
| 4/16/2018 6:43 | 0.2 | -7.5 | 2.2 | 19.8 | 4.2 | 3.4 | 0.01    | 4.4 |
| 4/16/2018 6:44 | 0.2 | -7.4 | 3.1 | 19.7 | 4.2 | 3.4 | 0.0101  | 4.3 |
| 4/16/2018 6:45 | 0.2 | -7.2 | 2.8 | 19.7 | 4.2 | 3.4 | 0.0203  | 4.3 |
| 4/16/2018 6:46 | 0.2 | -7.3 | 2.4 | 19.7 | 4.2 | 3.4 | 0.0147  | 4.5 |
| 4/16/2018 6:47 | 0.2 | -7.6 | 2.5 | 19.5 | 4.2 | 3.5 | 0.0191  | 4.5 |
| 4/16/2018 6:48 | 0.2 | -7.6 | 1.9 | 19.4 | 4.2 | 3.5 | 0.0021  | 4.5 |
| 4/16/2018 6:49 | 0.2 | -7.9 | 2.1 | 19.5 | 4.2 | 3.5 | 0.0146  | 4.5 |
| 4/16/2018 6:50 | 0.2 | -7.2 | 2.6 | 19.5 | 4.2 | 3.5 | 0.0107  | 4.5 |
| 4/16/2018 6:51 | 0.2 | -7.1 | 2.6 | 19.6 | 4.2 | 3.5 | 0.0034  | 4.4 |
| 4/16/2018 6:52 | 0.2 | -7.8 | 2.8 | 19.6 | 4.1 | 3.5 | 0.0189  | 4.6 |
| 4/16/2018 6:53 | 0.2 | -7.2 | 2.4 | 19.6 | 4.2 | 3.5 | -0.0031 | 4.6 |
| 4/16/2018 6:54 | 0.2 | -7.1 | 2.8 | 19.6 | 4.2 | 3.5 | 0.0209  | 4.7 |
| 4/16/2018 6:55 | 0.2 | -7   | 1.4 | 19.6 | 4.1 | 3.5 | 0.0083  | 4.7 |
| 4/16/2018 6:56 | 0.2 | -7.7 | 1.5 | 19.9 | 4.2 | 3.5 | 0.0108  | 4.7 |
| 4/16/2018 6:57 | 0.2 | -7.8 | 2.8 | 19.6 | 4.2 | 3.5 | 0.0194  | 4.6 |
| 4/16/2018 6:58 | 0.2 | -8.1 | 1.9 | 19.4 | 4.2 | 3.5 | 0.0058  | 4.7 |
| 4/16/2018 6:59 | 0.2 | -7.1 | 4.6 | 19.8 | 4.1 | 3.5 | 0.0223  | 4.5 |
| 4/16/2018 7:00 | 0.2 | -7.4 | 2.2 | 19.8 | 4.1 | 3.5 | 0.003   | 4.6 |

|                |     |        |     |      |     |     |         |     |
|----------------|-----|--------|-----|------|-----|-----|---------|-----|
| 4/16/2018 7:01 | 0.2 | -7     | 3.1 | 19.6 | 4.1 | 3.5 | 0.0161  | 4.4 |
| 4/16/2018 7:02 | 0.2 | -7     | 2.1 | 19.5 | 4.2 | 3.5 | 0.015   | 4.4 |
| 4/16/2018 7:03 | 0.3 | -7     | 2.4 | 19.6 | 4.1 | 3.5 | 0.0054  | 4.3 |
| 4/16/2018 7:04 | 0.3 | -7.8   | 2.2 | 19.5 | 4.1 | 3.5 | 0.0181  | 4.3 |
| 4/16/2018 7:05 | 0.3 | -7.7   | 2.2 | 19.7 | 4.2 | 3.5 | 0.0062  | 4.3 |
| 4/16/2018 7:06 | 0.2 | -7.1   | 2   | 19.6 | 4.2 | 3.5 | 0.0234  | 4.4 |
| 4/16/2018 7:07 | 0.2 | -7.2   | 2.6 | 19.4 | 4.2 | 3.5 | 0.013   | 4.5 |
| 4/16/2018 7:08 | 0.2 | -7.5   | 2.1 | 19.7 | 4.2 | 3.5 | 0.0027  | 3.9 |
| 4/16/2018 7:09 | 0.2 | -7.2   | 2.4 | 19.6 | 4.2 | 3.5 | 0.0164  | 4.1 |
| 4/16/2018 7:10 | 0.2 | -7.6   | 1.6 | 19.6 | 4.2 | 3.5 | -0.0003 | 4.1 |
| 4/16/2018 7:11 | 0.2 | -7     | 2.7 | 19.4 | 4.2 | 3.5 | 0.0129  | 4   |
| 4/16/2018 7:12 | 0.2 | -7.3   | 2.6 | 19.7 | 4.2 | 3.5 | 0.0034  | 4.1 |
| 4/16/2018 7:13 | 0.2 | -7.1   | 3.6 | 19.7 | 4.2 | 3.5 | 0.0113  | 4   |
| 4/16/2018 7:14 | 0.2 | -7.7   | 2.7 | 19.5 | 4.1 | 3.5 | 0.0174  | 4   |
| 4/16/2018 7:15 | 0.2 | -7.5   | 3.7 | 19.6 | 4.1 | 3.5 | 0.0053  | 3.9 |
| 4/16/2018 7:16 | 0.2 | -7.4   | 4   | 19.4 | 4.2 | 3.5 | 0.0156  | 3.9 |
| 4/16/2018 7:17 | 0.3 | -7.7   | 1.6 | 19.3 | 4.1 | 3.5 | 0.0046  | 3.9 |
| 4/16/2018 7:18 | 0.3 | -7.5   | 2.2 | 19.5 | 4.1 | 3.5 | 0.0211  | 3.9 |
| 4/16/2018 7:19 | 0.3 | -7.2   | 2.6 | 19.4 | 4.1 | 3.5 | 0.0146  | 3.9 |
| 4/16/2018 7:20 | 0.3 | -7     | 1.6 | 19.7 | 4.1 | 3.5 | 0.0096  | 3.9 |
| 4/16/2018 7:21 | 0.2 | -7.4   | 2.7 | 19.4 | 4.1 | 3.5 | 0.0156  | 3.9 |
| 4/16/2018 7:22 | 0.2 | -7.5   | 1.3 | 19.3 | 4.1 | 3.5 | 0.009   | 3.9 |
| 4/16/2018 7:23 | 0.3 | -7.5   | 2.4 | 19.7 | 4.1 | 3.5 | 0.0175  | 3.9 |
| 4/16/2018 7:24 | 0.3 | -7.7   | 2   | 19.6 | 4.1 | 3.5 | 0.0041  | 4   |
| 4/16/2018 7:25 | 0.3 | -7.6   | 2   | 19.6 | 4.1 | 3.5 | 0.0167  | 3.7 |
| 4/16/2018 7:26 | 0.2 | -7.2   | 3   | 19.4 | 4.1 | 3.5 | 0.0158  | 2.7 |
| 4/16/2018 7:27 | 0.3 | -7.1   | 3.2 | 19.5 | 4.1 | 3.5 | 0.0071  | 2.4 |
| 4/16/2018 7:28 | 0.3 | -7.5   | 2.4 | 19.4 | 4.1 | 3.6 | 0.0168  | 2.4 |
| 4/16/2018 7:29 | 0.2 | -7     | 2   | 19.5 | 4.1 | 3.6 | 0.0056  | 2.5 |
| 4/16/2018 7:30 | 0.2 | -7     | 2.2 | 19.4 | 4.1 | 3.6 | 0.0176  | 2.5 |
| 4/16/2018 7:31 | 0.2 | -131.4 | 2.7 | 19.7 | 4.1 | 3.6 | 0.0046  | 2.6 |
| 4/16/2018 7:32 | 0.3 | -16.1  | 2.4 | 19.5 | 4.1 | 3.6 | 0.0187  | 2.4 |
| 4/16/2018 7:33 | 0.5 | -1.7   | 4.2 | 20.9 | 4.1 | 3.6 | 0.02    | 1.7 |
| 4/16/2018 7:34 | 0.6 | -0.4   | 2.7 | 19   | 4.1 | 3.6 | 0.0086  | 1.7 |
| 4/16/2018 7:35 | 0.7 | -0.7   | 1.5 | 19.1 | 4.1 | 3.6 | 0.0154  | 1.7 |
| 4/16/2018 7:36 | 0.7 | 0.6    | 2.9 | 19.5 | 4.2 | 3.6 | 0.0059  | 1.7 |
| 4/16/2018 7:37 | 0.7 | 0.4    | 1.4 | 19.2 | 4.1 | 3.6 | 0.0131  | 1.8 |
| 4/16/2018 7:38 | 0.6 | -0.2   | 3.2 | 19.6 | 4.1 | 3.6 | 0.0088  | 1.7 |
| 4/16/2018 7:39 | 0.6 | 0.3    | 0.9 | 19.2 | 4.2 | 3.6 | 0.016   | 1.8 |
| 4/16/2018 7:40 | 0.6 | 0.5    | 1.6 | 19.5 | 4.1 | 3.6 | 0.0211  | 1.8 |
| 4/16/2018 7:41 | 0.6 | 0      | 2.4 | 19.8 | 4.1 | 3.6 | 0.0069  | 1.8 |
| 4/16/2018 7:42 | 0.6 | 0.7    | 2.9 | 19.6 | 4.2 | 3.6 | 0.0232  | 1.9 |
| 4/16/2018 7:43 | 0.6 | -0.2   | 2.1 | 19.4 | 4.2 | 3.6 | 0.0172  | 1.8 |
| 4/16/2018 7:44 | 0.6 | -0.1   | 2.3 | 19.6 | 4.2 | 3.6 | -0.01   | 1.8 |
| 4/16/2018 7:45 | 0.6 | 0.6    | 2.6 | 19.7 | 4.3 | 3.6 | 0.0261  | 1.8 |
| 4/16/2018 7:46 | 0.6 | 1      | 3.1 | 19.1 | 4.2 | 3.6 | 0.0025  | 1.8 |
| 4/16/2018 7:47 | 0.6 | 0.7    | 3.6 | 19.5 | 4.3 | 3.6 | 0.0209  | 1.8 |

|                |     |      |     |      |      |       |        |     |
|----------------|-----|------|-----|------|------|-------|--------|-----|
| 4/16/2018 7:48 | 0.6 | 0.8  | 3.5 | 19.7 | 4.3  | 3.6   | 0.0119 | 1.9 |
| 4/16/2018 7:49 | 0.6 | 0.6  | 1.8 | 19.3 | 4.3  | 3.6   | 0.0152 | 1.9 |
| 4/16/2018 7:50 | 0.6 | 0.4  | 3   | 19.3 | 4.4  | 3.6   | 0.0177 | 1.9 |
| 4/16/2018 7:51 | 0.6 | 0.5  | 1.7 | 19.5 | 4.3  | 3.6   | 0.0124 | 1.9 |
| 4/16/2018 7:52 | 0.6 | -0.4 | 2.7 | 19.2 | 4.4  | 3.6   | 0.0204 | 2   |
| 4/16/2018 7:53 | 0.6 | 0.8  | 1.7 | 19.2 | 4.4  | 3.6   | 0.0109 | 2   |
| 4/16/2018 7:54 | 0.7 | 0.4  | 1.5 | 19.4 | 4.4  | 3.6   | 0.0125 | 2   |
| 4/16/2018 7:55 | 0.7 | 0.4  | 3.2 | 19.5 | 4.4  | 3.6   | 0.0202 | 2   |
| 4/16/2018 7:56 | 0.6 | 0.9  | 2.6 | 19.4 | 4.4  | 3.6   | 0.0043 | 2.1 |
| 4/16/2018 7:57 | 0.6 | 0.7  | 2.2 | 19.4 | 4.4  | 3.6   | 0.0236 | 2.1 |
| 4/16/2018 7:58 | 0.6 | 0.7  | 2   | 19.4 | 4.4  | 3.6   | 0.0118 | 2.1 |
| 4/16/2018 7:59 | 0.6 | 1.2  | 3.4 | 19.3 | 4.4  | 3.6   | 0.0152 | 2.1 |
| 4/16/2018 8:00 | 0.6 | 1.1  | 2.4 | 19.4 | 4.5  | 3.6   | 0.0227 | 2.1 |
| 4/16/2018 8:01 | 0.6 | 1    | 2.9 | 19.7 | 4.4  | 3.6   | 0.0117 | 2.1 |
| 4/16/2018 8:02 | 0.6 | 1    | 2.2 | 20.6 | 13.2 | 11.2  | 0.0729 | 2.1 |
| 4/16/2018 8:03 | 0.4 | 0    | 2.7 | 20.9 | 21.6 | 71.1  | 0.1758 | 2.1 |
| 4/16/2018 8:04 | 0.3 | 0.1  | 1.9 | 21.9 | 31.2 | 121.7 | 0.4299 | 2   |
| 4/16/2018 8:05 | 0.2 | 0.7  | 2.2 | 23.3 | 37.7 | 144.8 | 0.7122 | 1.8 |
| 4/16/2018 8:06 | 0.2 | 0    | 3.8 | 25.6 | 40.9 | 157.7 | 1.1179 | 1.9 |
| 4/16/2018 8:07 | 0.2 | -0.2 | 3.3 | 29.1 | 40.9 | 167.1 | 1.6968 | 2   |
| 4/16/2018 8:08 | 0.2 | 0.7  | 3   | 30.9 | 43.2 | 167.4 | 2.1313 | 2.1 |
| 4/16/2018 8:09 | 0.2 | -0.2 | 3.8 | 31.1 | 44.7 | 166.8 | 2.3557 | 2.2 |
| 4/16/2018 8:10 | 0.2 | 0.5  | 3.9 | 31.8 | 43   | 158.3 | 2.7775 | 2.3 |
| 4/16/2018 8:11 | 0.2 | 0.2  | 2.4 | 31.7 | 43.6 | 163   | 3.1293 | 2.3 |
| 4/16/2018 8:12 | 0.1 | 0.2  | 3.4 | 30.7 | 41.8 | 158.2 | 3.1533 | 2.4 |
| 4/16/2018 8:13 | 0.1 | 0.4  | 2.3 | 30.9 | 41.2 | 158.2 | 3.4235 | 2.5 |
| 4/16/2018 8:14 | 0.1 | -0.3 | 2.4 | 29.9 | 39.8 | 150.7 | 3.4691 | 2.5 |
| 4/16/2018 8:15 | 0.1 | -0.1 | 1.8 | 30   | 39   | 149.2 | 3.521  | 2.6 |
| 4/16/2018 8:16 | 0.1 | 0.4  | 2.6 | 28.6 | 38   | 148   | 3.5038 | 2.6 |
| 4/16/2018 8:17 | 0.1 | 0.1  | 3.5 | 28.6 | 36.8 | 142.2 | 3.524  | 2.6 |
| 4/16/2018 8:18 | 0.1 | 0    | 2.6 | 28   | 36.1 | 140.4 | 3.5002 | 2.7 |
| 4/16/2018 8:19 | 0.1 | -0.1 | 1.8 | 27.5 | 34.7 | 135.5 | 3.4615 | 2.7 |
| 4/16/2018 8:20 | 0.1 | 0.6  | 3.5 | 27.5 | 34.9 | 139.2 | 3.5557 | 2.7 |
| 4/16/2018 8:21 | 0.1 | 0.5  | 1.8 | 27.7 | 35.3 | 139.5 | 3.6496 | 2.7 |
| 4/16/2018 8:22 | 0.1 | 0.6  | 3.3 | 26.9 | 33.7 | 133.8 | 3.4815 | 2.8 |
| 4/16/2018 8:23 | 0.1 | -0.5 | 3.1 | 26.4 | 33.1 | 132.9 | 3.4989 | 2.9 |
| 4/16/2018 8:24 | 0.2 | 0.5  | 3   | 26   | 31.9 | 127.6 | 3.4057 | 2.9 |
| 4/16/2018 8:25 | 0.2 | 0.7  | 2.6 | 26.4 | 32.9 | 134   | 3.5833 | 3   |
| 4/16/2018 8:26 | 0.2 | 0.7  | 1.7 | 25.8 | 31.6 | 129.7 | 3.4373 | 2.9 |
| 4/16/2018 8:27 | 0.2 | 0.5  | 1   | 25.4 | 30.6 | 124.8 | 3.3383 | 3   |
| 4/16/2018 8:28 | 0.3 | 0.2  | 2.3 | 25.4 | 30.5 | 125.4 | 3.4243 | 3.1 |
| 4/16/2018 8:29 | 0.3 | -0.3 | 2.3 | 24.5 | 29.4 | 119.6 | 3.2408 | 3.2 |
| 4/16/2018 8:30 | 0.3 | -0.1 | 3.4 | 24.5 | 28.2 | 118.2 | 3.2067 | 3.3 |
| 4/16/2018 8:31 | 0.3 | 0.1  | 3.2 | 24.4 | 28.4 | 120.6 | 3.2548 | 3.2 |
| 4/16/2018 8:32 | 0.3 | 0    | 3.7 | 24.7 | 29.1 | 122.6 | 3.413  | 3.2 |
| 4/16/2018 8:33 | 0.2 | -0.2 | 4.1 | 24.1 | 28.2 | 118   | 3.2723 | 3.3 |
| 4/16/2018 8:34 | 0.2 | 0.2  | 2.9 | 23.9 | 27.4 | 112.7 | 3.186  | 3.5 |

|                |     |      |     |      |      |       |        |     |
|----------------|-----|------|-----|------|------|-------|--------|-----|
| 4/16/2018 8:35 | 0.2 | 0.7  | 2.8 | 24.1 | 27.3 | 115   | 3.2716 | 3.5 |
| 4/16/2018 8:36 | 0.2 | -0.1 | 2.7 | 23.9 | 26.8 | 113.8 | 3.2018 | 3.6 |
| 4/16/2018 8:37 | 0.2 | 0.7  | 2.8 | 23.7 | 26.9 | 114.3 | 3.2243 | 3.5 |
| 4/16/2018 8:38 | 0.2 | 0.5  | 3.6 | 23.7 | 26.1 | 113.8 | 3.1513 | 3.6 |
| 4/16/2018 8:39 | 0.3 | 0.9  | 3.4 | 23.7 | 26.6 | 116.3 | 3.2361 | 3.6 |
| 4/16/2018 8:40 | 0.3 | 0.6  | 2.6 | 23.6 | 26.2 | 116   | 3.2177 | 3.6 |
| 4/16/2018 8:41 | 0.2 | 0.2  | 3.1 | 23.4 | 26.3 | 115.9 | 3.2557 | 3.5 |
| 4/16/2018 8:42 | 0.2 | -0.2 | 3.6 | 22.9 | 25.4 | 115.3 | 3.129  | 3.5 |
| 4/16/2018 8:43 | 0.2 | 0    | 4.7 | 23.3 | 24.9 | 109.6 | 3.0892 | 3.6 |
| 4/16/2018 8:44 | 0.2 | 0.9  | 3.1 | 22.9 | 24.4 | 108.3 | 3.0003 | 3.6 |
| 4/16/2018 8:45 | 0.2 | 0.4  | 2.2 | 22.7 | 23.6 | 103   | 2.8955 | 3.7 |
| 4/16/2018 8:46 | 0.2 | 0.9  | 2.4 | 22.7 | 23.7 | 105.2 | 3.0059 | 3.7 |
| 4/16/2018 8:47 | 0.2 | 0.4  | 3.7 | 22.5 | 23.9 | 106.3 | 3.0051 | 3.7 |
| 4/16/2018 8:48 | 0.2 | 0.2  | 1.9 | 22.7 | 23.1 | 101.9 | 2.9192 | 3.6 |
| 4/16/2018 8:49 | 0.2 | 1    | 3.2 | 22.8 | 23.4 | 104.9 | 3.0018 | 3.6 |
| 4/16/2018 8:50 | 0.2 | 0.6  | 2.6 | 22.5 | 23.3 | 106.2 | 3.0158 | 3.5 |
| 4/16/2018 8:51 | 0.2 | 0.1  | 1.5 | 22   | 22.1 | 99.4  | 2.8035 | 3.5 |
| 4/16/2018 8:52 | 0.2 | 0.5  | 2.9 | 22.2 | 22.4 | 101.6 | 2.8949 | 3.5 |
| 4/16/2018 8:53 | 0.2 | -0.2 | 2.7 | 22.2 | 22   | 98.3  | 2.8687 | 3.5 |
| 4/16/2018 8:54 | 0.2 | 0.6  | 3   | 22.2 | 22   | 102   | 2.8607 | 3.5 |
| 4/16/2018 8:55 | 0.2 | 0.3  | 4.6 | 22.1 | 21.6 | 101.1 | 2.8423 | 3.5 |
| 4/16/2018 8:56 | 0.3 | 0.5  |     | 22   | 20.4 | 91.3  | 2.6506 | 3.5 |
| 4/16/2018 8:57 | 0.3 | 0.4  |     | 23   | 20.7 | 94.9  | 2.734  | 3.5 |
| 4/16/2018 8:58 | 0.3 | 0.2  | 2.1 | 21.9 | 20.5 | 92.4  | 2.7279 | 3.5 |
| 4/16/2018 8:59 | 0.2 | 0.3  | 6.4 | 21.9 | 20.7 | 95.9  | 2.7632 | 3.5 |
| 4/16/2018 9:00 | 0.2 | 0    |     | 21.6 | 19.7 | 90.3  | 2.5987 | 3.5 |
| 4/16/2018 9:01 | 0.2 | 0.5  | 1.3 | 21.7 | 20.1 | 95    | 2.6816 | 3.5 |
| 4/16/2018 9:02 | 0.3 | 0.9  | 2.3 | 21.3 | 19.2 | 93.9  | 2.5308 | 3.4 |
| 4/16/2018 9:03 | 0.3 | -0.1 | 4   | 22   | 19.8 | 93.7  | 2.6844 | 3.4 |
| 4/16/2018 9:04 | 0.3 | -0.1 | 2.7 | 21.6 | 19.4 | 93.4  | 2.6419 | 3.5 |
| 4/16/2018 9:05 | 0.2 | 0.3  | 7.6 | 21.6 | 19.4 | 93.1  | 2.6537 | 3.5 |
| 4/16/2018 9:06 | 0.2 | -0.2 | 9.9 | 21.4 | 18.9 | 92.4  | 2.5838 | 3.5 |
| 4/16/2018 9:07 | 0.2 | 0.1  | 3.8 | 21.3 | 18.9 | 91.9  | 2.5838 | 3.5 |
| 4/16/2018 9:08 | 0.2 | 0.1  | 1.6 | 21.1 | 18.9 | 85.1  | 2.4539 | 3.5 |
| 4/16/2018 9:09 | 0.2 | 0.8  | 3.9 | 21.4 | 18.6 | 87.8  | 2.5166 | 3.5 |
| 4/16/2018 9:10 | 0.2 | 0.4  | 1.8 | 21.4 | 18.2 | 89.5  | 2.5455 | 3.5 |
| 4/16/2018 9:11 | 0.2 | 0.6  | 2.3 | 21.4 | 18.2 | 88.9  | 2.5502 | 3.6 |
| 4/16/2018 9:12 | 0.2 | 0.7  | 3.2 | 21.3 | 18.1 | 88.5  | 2.5367 | 3.6 |
| 4/16/2018 9:13 | 0.2 | 0.2  | 1.9 | 21   | 17.5 | 88.2  | 2.4148 | 3.6 |
| 4/16/2018 9:14 | 0.2 | 0.2  | 2.3 | 21.1 | 17.1 | 85    | 2.3523 | 3.6 |
| 4/16/2018 9:15 | 0.2 | 0.4  | 4.1 | 20.8 | 17.3 | 83.3  | 2.4355 | 3.7 |
| 4/16/2018 9:16 | 0.2 | 0.4  | 2.9 | 20.6 | 16.6 | 79.4  | 2.2227 | 3.8 |
| 4/16/2018 9:17 | 0.3 | 0.5  | 1.7 | 20.7 | 16.1 | 76    | 2.1372 | 3.8 |
| 4/16/2018 9:18 | 0.5 | 1.9  | 1.9 | 20.6 | 15   | 60.7  | 1.6137 | 3.8 |
| 4/16/2018 9:19 | 0.9 | 1.7  | 2.1 | 20.4 | 14.2 | 42.8  | 1.2885 | 3.8 |
| 4/16/2018 9:20 | 1.5 | 2.5  | 3.1 | 20.4 | 14.1 | 37.5  | 1.0633 | 3.8 |
| 4/16/2018 9:21 | 1.9 | 3    | 3   | 21   | 14.4 | 30.3  | 0.9057 | 3.8 |

|                 |     |      |     |      |      |       |        |     |
|-----------------|-----|------|-----|------|------|-------|--------|-----|
| 4/16/2018 9:22  | 2.2 | 2.7  | 1.8 | 20.7 | 14.8 | 30.3  | 1.0024 | 3.8 |
| 4/16/2018 9:23  | 2.4 | 3.4  | 3.1 | 21   | 14.7 | 30.1  | 0.8522 | 3.9 |
| 4/16/2018 9:24  | 2.6 | 2.8  | 3.1 | 21.2 | 15   | 29.8  | 0.9039 | 3.9 |
| 4/16/2018 9:25  | 2.8 | 2.9  | 3.4 | 21.4 | 15.5 | 29.4  | 0.8561 | 3.9 |
| 4/16/2018 9:26  | 2.8 | 2.5  | 2.7 | 20.8 | 15.6 | 28.9  | 0.8735 | 3.9 |
| 4/16/2018 9:27  | 2.6 | 3.4  | 3.5 | 21.1 | 16.5 | 28.9  | 0.8857 | 3.9 |
| 4/16/2018 9:28  | 2.7 | 3.3  | 3   | 21.3 | 15.8 | 27.4  | 0.643  | 4.4 |
| 4/16/2018 9:29  | 2.7 | 4    | 3.4 | 21   | 15.9 | 25.9  | 0.6548 | 4.5 |
| 4/16/2018 9:30  | 3.2 | 4.5  | 3.6 | 21.7 | 15.9 | 24    | 0.5302 | 3.8 |
| 4/16/2018 9:31  | 3.4 | 3.8  | 4.3 | 21.7 | 16   | 22.1  | 0.5447 | 3.7 |
| 4/16/2018 9:32  | 3.7 | 4.3  | 2.4 | 22   | 16   | 20.6  | 0.5204 | 3.7 |
| 4/16/2018 9:33  | 3.9 | 4.1  | 3.8 | 21.8 | 16   | 18.6  | 0.5078 | 3.5 |
| 4/16/2018 9:34  | 4.1 | 4.5  | 4.6 | 22.1 | 15.8 | 17.5  | 0.5013 | 3.4 |
| 4/16/2018 9:35  | 4.2 | 4.8  | 3.6 | 21.9 | 15.7 | 15.3  | 0.4998 | 3.5 |
| 4/16/2018 9:36  | 4.3 | 5.3  | 4.5 | 22.5 | 15.6 | 14    | 0.4569 | 3.6 |
| 4/16/2018 9:37  | 4.5 | 5.4  | 3.7 | 22.4 | 15.9 | 12.9  | 0.4471 | 3.6 |
| 4/16/2018 9:38  | 4.8 | 5.7  | 4   | 22.8 | 15.8 | 12.2  | 0.44   | 3.5 |
| 4/16/2018 9:39  | 4.8 | 5.1  | 4.1 | 22.6 | 15.8 | 11.6  | 0.4344 | 3.5 |
| 4/16/2018 9:40  | 4.9 | 5.5  | 3.8 | 23.2 | 15.8 | 10.8  | 0.3585 | 3.5 |
| 4/16/2018 9:41  | 5.1 | 6.4  | 4.4 | 23.5 | 15.5 | 10.4  | 0.3733 | 3.6 |
| 4/16/2018 9:42  | 5.5 | 6.1  | 3.1 | 23.3 | 15.3 | 9.6   | 0.3358 | 3.7 |
| 4/16/2018 9:43  | 5.6 | 6.5  | 4.1 | 23.7 | 15.8 | 8.9   | 0.36   | 3.7 |
| 4/16/2018 9:44  | 5.9 | 6    | 3.2 | 23.4 | 14.9 | 8.3   | 0.3352 | 3.7 |
| 4/16/2018 9:45  | 5.7 | 5.6  | 5.1 | 23.7 | 16   | 7.8   | 0.3404 | 3.5 |
| 4/16/2018 9:46  | 6   | 7.1  | 4.4 | 24.5 | 14.4 | 7.2   | 0.2677 | 3.5 |
| 4/16/2018 9:47  | 6   | 6.1  | 3.4 | 23.8 | 13.9 | 6.7   | 0.2795 | 3.6 |
| 4/16/2018 9:48  | 5.9 | 4.5  | 4.5 | 22.5 | 15.1 | 6.4   | 0.3536 | 3.6 |
| 4/16/2018 9:49  | 5   | 4.7  | 3.2 | 22   | 15.6 | 6.2   | 0.3448 | 3.6 |
| 4/16/2018 9:50  | 4.2 | 4    | 3.5 | 21.5 | 15.8 | 6     | 0.3443 | 3.5 |
| 4/16/2018 9:51  | 3.7 | 4.4  | 3.6 | 21.3 | 16   | 5.8   | 0.3472 | 3.4 |
| 4/16/2018 9:52  | 3.4 | 3.1  | 3.5 | 21.2 | 16.6 | 5.7   | 0.3497 | 3.2 |
| 4/16/2018 9:53  | 3.2 | 2.9  | 2.4 | 21   | 17.5 | 5.5   | 0.3682 | 3.2 |
| 4/16/2018 9:54  | 3   | 3    | 3.3 | 20.9 | 17.4 | 5.4   | 0.358  | 3.2 |
| 4/16/2018 9:55  | 2.8 | 2.4  | 3.1 | 21   | 17.5 | 5.4   | 0.3676 | 3.2 |
| 4/16/2018 9:56  | 2.6 | 2.5  | 2.7 | 20.7 | 17.6 | 5.3   | 0.37   | 3.3 |
| 4/16/2018 9:57  | 2.4 | 1.8  | 2.3 | 20.7 | 17.5 | 5.2   | 0.3563 | 3.4 |
| 4/16/2018 9:58  | 2.2 | 2.1  | 2   | 20.6 | 17.3 | 5.1   | 0.3701 | 3.4 |
| 4/16/2018 9:59  | 2.1 | 2.3  | 2.9 | 20.4 | 17.1 | 5     | 0.3571 | 3.4 |
| 4/16/2018 10:00 | 2   | 2.4  | 2.4 | 20.4 | 17.3 | 5     | 0.3799 | 3.4 |
| 4/16/2018 10:01 | 1.9 | 1.8  | 1.8 | 20.3 | 17.2 | 5.1   | 0.3745 | 3.4 |
| 4/16/2018 10:02 | 1.6 | 1    | 1.1 | 22.2 | 26.4 | 32.7  | 0.4653 | 3.5 |
| 4/16/2018 10:03 | 1.1 | 0.8  | 2.4 | 26.3 | 47.5 | 82.7  | 0.7899 | 3.5 |
| 4/16/2018 10:04 | 0.6 | 0.1  | 2.2 | 29   | 57.6 | 138.7 | 1.0377 | 3.5 |
| 4/16/2018 10:05 | 0.3 | 0.6  | 3.7 | 32.9 | 66.2 | 159   | 1.3495 | 3.5 |
| 4/16/2018 10:06 | 0.2 | 0.3  | 3.8 | 35.4 | 70.4 | 162.7 | 1.6168 | 3.6 |
| 4/16/2018 10:07 | 0.3 | -0.1 | 3.3 | 43   | 70.8 | 162.9 | 2.0015 | 3.6 |
| 4/16/2018 10:08 | 0.3 | 0.7  | 3.6 | 56.3 | 68.7 | 169.6 | 2.5268 | 3.7 |

|                 |     |      |     |      |      |       |        |     |
|-----------------|-----|------|-----|------|------|-------|--------|-----|
| 4/16/2018 10:09 | 0.3 | 1.2  | 4.2 | 63.2 | 69.9 | 176.6 | 3.091  | 3.9 |
| 4/16/2018 10:10 | 0.3 | 0.5  | 4.8 | 67.6 | 70.9 | 176.3 | 3.462  | 4   |
| 4/16/2018 10:11 | 0.2 | 0.1  | 3.4 | 64.9 | 71.6 | 177.7 | 3.5968 | 4.1 |
| 4/16/2018 10:12 | 0.3 | 0    | 2.4 | 64.4 | 66.2 | 163   | 3.6035 | 4.1 |
| 4/16/2018 10:13 | 0.3 | 0.4  | 4.5 | 66.7 | 68.7 | 169.5 | 4.1733 | 4.1 |
| 4/16/2018 10:14 | 0.3 | 0.2  | 4.2 | 64.5 | 66.2 | 164.7 | 4.3735 | 4   |
| 4/16/2018 10:15 | 0.3 | 0.6  | 4.5 | 62.1 | 64.5 | 158.5 | 4.4327 | 4.2 |
| 4/16/2018 10:16 | 0.2 | 0.4  | 4   | 60.8 | 63.3 | 160.8 | 4.5802 | 4.4 |
| 4/16/2018 10:17 | 0.2 | -0.2 | 3.1 | 56   | 60.3 | 151.9 | 4.4443 | 4.3 |
| 4/16/2018 10:18 | 0.2 | 0    | 5.2 | 55.6 | 57.8 | 145.3 | 4.3755 | 4.3 |
| 4/16/2018 10:19 | 0.2 | 0.2  | 4.5 | 56.6 | 58.7 | 150.3 | 4.697  | 4.3 |
| 4/16/2018 10:20 | 0.2 | 0.1  | 4.9 | 53   | 57.2 | 148.3 | 4.717  | 4.3 |
| 4/16/2018 10:21 | 0.2 | -0.5 | 4.3 | 51.8 | 55.1 | 146.2 | 4.6888 | 4.2 |
| 4/16/2018 10:22 | 0.2 | 0.3  | 2.8 | 50.4 | 54.1 | 142.2 | 4.8177 | 4.3 |
| 4/16/2018 10:23 | 0.2 | 0.7  | 3.5 | 48.7 | 52.9 | 141.3 | 4.7522 | 4.3 |
| 4/16/2018 10:24 | 0.2 | 0.4  | 3.6 | 46.7 | 49.9 | 134.4 | 4.5548 | 4.3 |
| 4/16/2018 10:25 | 0.2 | 0.6  | 3.3 | 47.9 | 51.5 | 139.1 | 4.921  | 4.3 |
| 4/16/2018 10:26 | 0.1 | 0.1  | 3.2 | 47   | 50.9 | 138.7 | 4.9058 | 4.3 |
| 4/16/2018 10:27 | 0.1 | -0.8 | 3   | 46.7 | 50.6 | 138.6 | 5.0868 | 4.3 |
| 4/16/2018 10:28 | 0.1 | 0.2  | 4   | 45   | 49   | 136.6 | 4.955  | 4.3 |
| 4/16/2018 10:29 | 0.1 | 0.2  | 3.7 | 41.6 | 46.7 | 135.9 | 4.7125 | 4.3 |
| 4/16/2018 10:30 | 0.1 | 0.1  | 3.8 | 43.1 | 47.1 | 133.2 | 4.9645 | 4.3 |
| 4/16/2018 10:31 | 0.1 | 0.3  | 4.6 | 41.4 | 45.8 | 130.9 | 4.8558 | 4.3 |
| 4/16/2018 10:32 | 0.1 | 1.1  | 1.6 | 41   | 45.4 | 130.1 | 4.954  | 4.3 |
| 4/16/2018 10:33 | 0.2 | 0.4  | 3.5 | 39   | 44.2 | 128.4 | 4.8515 | 4.2 |
| 4/16/2018 10:34 | 0.2 | 0.1  | 2.2 | 38.8 | 42.1 | 123.5 | 4.7047 | 4.2 |
| 4/16/2018 10:35 | 0.2 | -0.2 | 4.7 | 38.8 | 42.9 | 126.6 | 4.8502 | 4.2 |
| 4/16/2018 10:36 | 0.2 | 0.8  | 4.1 | 37.8 | 41.7 | 123.7 | 4.8243 | 4.2 |
| 4/16/2018 10:37 | 0.2 | 1.1  | 3.5 | 38.4 | 42.8 | 127.2 | 5.04   | 4.2 |
| 4/16/2018 10:38 | 0.2 | 1.3  | 2.6 | 35.1 | 39.9 | 115.8 | 4.602  | 4.2 |
| 4/16/2018 10:39 | 0.2 | 0.2  | 4.1 | 37.7 | 40.6 | 121.4 | 4.9447 | 4.3 |
| 4/16/2018 10:40 | 0.2 | 0.2  | 2   | 36   | 40.3 | 122.3 | 4.9317 | 4.3 |
| 4/16/2018 10:41 | 0.2 | 0.4  | 4.1 | 35.8 | 39.4 | 122   | 4.889  | 4.4 |
| 4/16/2018 10:42 | 0.2 | 0.4  | 3.6 | 34   | 38.4 | 118.5 | 4.7583 | 4.4 |
| 4/16/2018 10:43 | 0.2 | 1    | 3.9 | 32.8 | 36   | 104.9 | 4.5082 | 4.3 |
| 4/16/2018 10:44 | 0.2 | 0    | 3.5 | 33.5 | 37.6 | 115.5 | 4.8318 | 4.4 |
| 4/16/2018 10:45 | 0.2 | 1    | 1.5 | 32.2 | 34.7 | 108.1 | 4.3733 | 4.4 |
| 4/16/2018 10:46 | 0.2 | 0.2  | 3.4 | 33.5 | 36.6 | 115.2 | 4.8043 | 4.4 |
| 4/16/2018 10:47 | 0.2 | 0.4  | 2.2 | 31.7 | 35   | 113.4 | 4.5352 | 4.5 |
| 4/16/2018 10:48 | 0.2 | 0.5  | 2.9 | 31.3 | 34.2 | 109.7 | 4.519  | 4.4 |
| 4/16/2018 10:49 | 0.2 | 0.6  | 1.6 | 31   | 33.9 | 105.7 | 4.5062 | 4.3 |
| 4/16/2018 10:50 | 0.2 | 0.2  | 3.2 | 30.2 | 33.2 | 100.3 | 4.3982 | 4   |
| 4/16/2018 10:51 | 0.2 | 0.7  | 3.6 | 29.9 | 32.7 | 104.5 | 4.4228 | 4   |
| 4/16/2018 10:52 | 0.2 | 0.8  | 3.8 | 30.3 | 32.4 | 103.6 | 4.4385 | 4   |
| 4/16/2018 10:53 | 0.2 | -0.5 | 3.4 | 30.3 | 32.9 | 107.5 | 4.5757 | 4   |
| 4/16/2018 10:54 | 0.2 | 0.1  | 1.8 | 30.3 | 32.8 | 108.2 | 4.6325 | 4   |
| 4/16/2018 10:55 | 0.2 | 0.6  | 3.8 | 29.4 | 31.3 | 99.8  | 4.3372 | 4   |

|                 |     |      |     |      |      |       |        |     |
|-----------------|-----|------|-----|------|------|-------|--------|-----|
| 4/16/2018 10:56 | 0.2 | 0.6  | 3.9 | 29.8 | 31.5 | 104.2 | 4.5108 | 4.1 |
| 4/16/2018 10:57 | 0.2 | 0.9  | 3.4 | 29.7 | 31.9 | 104.7 | 4.5803 | 3.2 |
| 4/16/2018 10:58 | 0.2 | 0.2  | 3.4 | 28.3 | 30.3 | 97.9  | 4.2858 | 3.2 |
| 4/16/2018 10:59 | 0.2 | 0.7  | 2.1 | 28.7 | 30.2 | 99.4  | 4.3263 | 3.5 |
| 4/16/2018 11:00 | 0.2 | 0.7  | 3.4 | 28.4 | 29.6 | 97.8  | 4.2403 | 3.7 |
| 4/16/2018 11:01 | 0.2 | -0.6 | 2.2 | 27.9 | 29.7 | 97.8  | 4.2987 | 3.9 |
| 4/16/2018 11:02 | 0.2 | 0.4  | 2.8 | 27.4 | 28.2 | 92.1  | 4.0313 | 4   |
| 4/16/2018 11:03 | 0.2 | 0.5  | 3.6 | 27.9 | 28.4 | 95.3  | 4.1598 | 4.1 |
| 4/16/2018 11:04 | 0.3 | 0.7  | 3.3 | 27   | 28.1 | 96.4  | 4.1072 | 4   |
| 4/16/2018 11:05 | 0.3 | 0.5  | 2.2 | 27.1 | 27.3 | 91.2  | 4.0593 | 3.8 |
| 4/16/2018 11:06 | 0.3 | 0.4  | 3.2 | 27.1 | 27.6 | 94.2  | 4.1175 | 3.7 |
| 4/16/2018 11:07 | 0.3 | 1    | 3.4 | 26.5 | 27.3 | 90.6  | 4.069  | 3.7 |
| 4/16/2018 11:08 | 0.3 | 0.2  | 3.7 | 27.3 | 27.4 | 94.1  | 4.1592 | 3.8 |
| 4/16/2018 11:09 | 0.3 | 0.3  | 2.9 | 25.8 | 26.9 | 90.4  | 3.976  | 3.8 |
| 4/16/2018 11:10 | 0.3 | 0.4  | 1.8 | 25.6 | 26.9 | 86.1  | 3.8193 | 3.9 |
| 4/16/2018 11:11 | 0.4 | 0.8  | 3.1 | 26.3 | 26.6 | 86.7  | 3.8887 | 3.9 |
| 4/16/2018 11:12 | 0.4 | 0.3  | 3.7 | 26.5 | 26.1 | 91.2  | 4.038  | 4   |
| 4/16/2018 11:13 | 0.4 | 0.3  | 3.5 | 25.8 | 25.4 | 90.4  | 3.8395 | 4   |
| 4/16/2018 11:14 | 0.4 | 0.9  | 2.4 | 25.9 | 24.9 | 86.6  | 3.8031 | 4   |
| 4/16/2018 11:15 | 0.4 | 0.2  | 2.2 | 25.6 | 24.8 | 86.7  | 3.8421 | 4   |
| 4/16/2018 11:16 | 0.4 | 0.7  | 2.1 | 26   | 24.9 | 88.1  | 3.9228 | 4.1 |
| 4/16/2018 11:17 | 0.3 | 0.6  | 3.5 | 25.9 | 24.8 | 87.5  | 3.8982 | 4.1 |
| 4/16/2018 11:18 | 0.4 | 0.6  | 2.5 | 24.7 | 24   | 84.5  | 3.6995 | 4.1 |
| 4/16/2018 11:19 | 0.4 | 0.8  | 2.4 | 24.7 | 23.4 | 80.2  | 3.6478 | 4.1 |
| 4/16/2018 11:20 | 0.4 | 0.5  | 3.5 | 24.3 | 23.4 | 80.4  | 3.6342 | 4.1 |
| 4/16/2018 11:21 | 0.4 | 0.4  | 2.5 | 24.1 | 22.5 | 76.6  | 3.4314 | 4   |
| 4/16/2018 11:22 | 0.5 | 0.3  | 0.2 | 24.4 | 22.7 | 77.2  | 3.527  | 4.1 |
| 4/16/2018 11:23 | 0.5 | 0.3  | 1.7 | 23.2 | 21.9 | 77    | 3.2429 | 4   |
| 4/16/2018 11:24 | 0.6 | 0.5  | 3.2 | 22.4 | 20.3 | 65.8  | 2.886  | 4   |
| 4/16/2018 11:25 | 1   | 3    | 3   | 20.2 | 19.2 | 44.5  | 1.897  | 3.9 |
| 4/16/2018 11:26 | 1.6 | 3.4  | 3.9 | 18.9 | 16.9 | 26.8  | 1.3793 | 3.7 |
| 4/16/2018 11:27 | 2.2 | 3.4  | 3.7 | 19.1 | 16.4 | 22    | 1.2115 | 3.8 |
| 4/16/2018 11:28 | 2.5 | 3.2  | 3.3 | 19.7 | 16.5 | 20.4  | 1.2129 | 3.7 |
| 4/16/2018 11:29 | 2.8 | 4.2  | 4.2 | 19.6 | 15.7 | 18.7  | 1.0471 | 3.8 |
| 4/16/2018 11:30 | 3   | 4.2  | 3.9 | 20.1 | 15.4 | 18.4  | 0.9839 | 3.9 |
| 4/16/2018 11:31 | 3.3 | 4    | 3.3 | 20.3 | 14.8 | 18    | 0.9287 | 4   |
| 4/16/2018 11:32 | 3.5 | 4.4  | 2.3 | 20.5 | 14.6 | 17.6  | 0.8773 | 4.1 |
| 4/16/2018 11:33 | 3.8 | 4.8  | 4   | 20.8 | 14.1 | 16.8  | 0.8241 | 4.2 |
| 4/16/2018 11:34 | 3.9 | 4.3  | 3   | 20.8 | 14.3 | 16.3  | 0.8778 | 4   |
| 4/16/2018 11:35 | 4   | 5    | 3.4 | 21.1 | 14   | 15.6  | 0.7834 | 3.8 |
| 4/16/2018 11:36 | 4.1 | 5.3  | 3.7 | 21.4 | 14.1 | 14.6  | 0.773  | 3.7 |
| 4/16/2018 11:37 | 4.3 | 5.4  | 3.8 | 21.2 | 14.4 | 13.8  | 0.7832 | 3.7 |
| 4/16/2018 11:38 | 4.3 | 4.3  | 2.5 | 21.3 | 15.3 | 13.3  | 0.8381 | 3.7 |
| 4/16/2018 11:39 | 4.4 | 6.8  | 5   | 22.9 | 15   | 12.9  | 0.8118 | 3.8 |
| 4/16/2018 11:40 | 5.2 | 7.6  |     | 22.6 | 14.1 | 12.3  | 0.7272 | 3.8 |
| 4/16/2018 11:41 | 6.1 | 8.3  |     | 23.7 | 14.2 | 12    | 0.6879 | 3.8 |
| 4/16/2018 11:42 | 7.2 | 9.1  |     | 24.7 | 13.4 | 11.3  | 0.5981 | 3.8 |

|                 |      |      |      |      |      |      |        |     |
|-----------------|------|------|------|------|------|------|--------|-----|
| 4/16/2018 11:43 | 7.5  | 8.7  |      | 24.6 | 12.9 | 10.7 | 0.6239 | 3.6 |
| 4/16/2018 11:44 | 7.9  | 8.2  |      | 24.5 | 12.8 | 10.4 | 0.6153 | 3.6 |
| 4/16/2018 11:45 | 7.6  | 8.6  |      | 24.3 | 13.7 | 10.1 | 0.6368 | 3.6 |
| 4/16/2018 11:46 | 7.6  | 8.5  |      | 24.7 | 13.2 | 9.5  | 0.5341 | 3.8 |
| 4/16/2018 11:47 | 7.5  | 7.8  | 8.2  | 24.3 | 13.9 | 8.9  | 0.558  | 3.7 |
| 4/16/2018 11:48 | 7.5  | 7.8  | 14.2 | 24.2 | 13.8 | 8.4  | 0.5743 | 3.5 |
| 4/16/2018 11:49 | 7.5  | 8.8  | 6.7  | 25.4 | 13.1 | 7.9  | 0.4928 | 3.6 |
| 4/16/2018 11:50 | 7.8  | 8.3  | 11   | 25.1 | 12.6 | 7.5  | 0.6117 | 3.7 |
| 4/16/2018 11:51 | 8.2  | 9    | 12.6 | 24.7 | 12.2 | 7.2  | 0.5818 | 3.8 |
| 4/16/2018 11:52 | 8.2  | 8.9  | 12.4 | 25.2 | 12.5 | 6.9  | 0.5159 | 3.8 |
| 4/16/2018 11:53 | 8.2  | 9    | 25.4 | 25.4 | 12.2 | 6.5  | 0.4844 | 3.8 |
| 4/16/2018 11:54 | 8    | 8.1  |      | 24.5 | 12.5 | 6.2  | 0.4643 | 3   |
| 4/16/2018 11:55 | 7.7  | 8.3  | 4.2  | 24.3 | 13.4 | 5.9  | 0.4657 | 2.5 |
| 4/16/2018 11:56 | 7.7  | 9    | 4.5  | 25.3 | 12   | 5.6  | 0.4049 | 2.9 |
| 4/16/2018 11:57 | 7.9  | 9.6  | 5.3  | 25.5 | 11.4 | 5.3  | 0.3928 | 3.1 |
| 4/16/2018 11:58 | 8.4  | 9.1  | 5.1  | 25.4 | 11.5 | 5.1  | 0.3699 | 3.3 |
| 4/16/2018 11:59 | 8.4  | 9.4  | 5.4  | 25.4 | 11.7 | 4.8  | 0.3676 | 3.5 |
| 4/16/2018 12:00 | 8.4  | 9.9  | 16.8 | 25.6 | 11.4 | 4.6  | 0.3527 | 3.5 |
| 4/16/2018 12:01 | 8.6  | 9.7  | 7.5  | 26   | 10.9 | 4.3  | 0.3124 | 3.5 |
| 4/16/2018 12:02 | 8.9  | 9.7  | 7    | 26.2 | 10.4 | 4.1  | 0.2995 | 3.5 |
| 4/16/2018 12:03 | 9.1  | 10   | 6.6  | 26.1 | 10.3 | 4    | 0.2822 | 3.5 |
| 4/16/2018 12:04 | 9.2  | 9.6  | 6.2  | 25.8 | 10.4 | 3.9  | 0.2803 | 3.5 |
| 4/16/2018 12:05 | 9.1  | 9.6  | 5.9  | 26.1 | 10.5 | 3.8  | 0.258  | 3.6 |
| 4/16/2018 12:06 | 9.1  | 9.2  | 6.5  | 26   | 10.4 | 3.7  | 0.2496 | 3.7 |
| 4/16/2018 12:07 | 9.1  | 10.1 | 6    | 26.4 | 10.3 | 3.5  | 0.2454 | 3.7 |
| 4/16/2018 12:08 | 9.3  | 10.4 | 6    | 26.3 | 10.1 | 3.5  | 0.2211 | 3.4 |
| 4/16/2018 12:09 | 9.4  | 10.9 | 6    | 26.6 | 10   | 3.4  | 0.2142 | 3.2 |
| 4/16/2018 12:10 | 9.5  | 10.6 | 8.1  | 26.4 | 10   | 3.3  | 0.1912 | 3.3 |
| 4/16/2018 12:11 | 9.6  | 10.5 | 5.2  | 26.6 | 10   | 3.2  | 0.1939 | 3.4 |
| 4/16/2018 12:12 | 9.6  | 10.2 | 6.6  | 26.4 | 10   | 3.1  | 0.1744 | 3.5 |
| 4/16/2018 12:13 | 9.6  | 10.3 | 6.5  | 26.7 | 9.9  | 3    | 0.1729 | 3.4 |
| 4/16/2018 12:14 | 9.7  | 10   | 6.8  | 26.4 | 9.9  | 3    | 0.1664 | 3.6 |
| 4/16/2018 12:15 | 9.6  | 10.5 | 6.3  | 26.6 | 9.8  | 2.9  | 0.1536 | 3.6 |
| 4/16/2018 12:16 | 9.8  | 11.4 | 6.6  | 26.8 | 9.7  | 2.8  | 0.1581 | 3.6 |
| 4/16/2018 12:17 | 9.9  | 10.9 | 6.3  | 26.6 | 9.6  | 2.7  | 0.1381 | 3.6 |
| 4/16/2018 12:18 | 9.9  | 11   | 6.4  | 26.5 | 9.6  | 2.7  | 0.1491 | 3.7 |
| 4/16/2018 12:19 | 9.9  | 11.4 | 5.8  | 26.9 | 9.5  | 2.6  | 0.1266 | 3.9 |
| 4/16/2018 12:20 | 10.1 | 10.6 | 6.4  | 27.2 | 9.4  | 2.6  | 0.1268 | 3.9 |
| 4/16/2018 12:21 | 10.2 | 10.8 | 6.5  | 27.1 | 9.3  | 2.5  | 0.1255 | 3.9 |
| 4/16/2018 12:22 | 10.2 | 10.8 | 5.3  | 26.8 | 9.2  | 2.5  | 0.1129 | 4   |
| 4/16/2018 12:23 | 10.1 | 11.1 | 7.9  | 27.4 | 9.1  | 2.5  | 0.1196 | 3.8 |
| 4/16/2018 12:24 | 10.3 | 11.1 | 7.4  | 27.5 | 9    | 2.5  | 0.0938 | 3.5 |
| 4/16/2018 12:25 | 10.5 | 11.7 | 8    | 27.7 | 8.9  | 2.5  | 0.1093 | 2.6 |
| 4/16/2018 12:26 | 10.7 | 11.2 | 7.8  | 27.9 | 8.9  | 2.4  | 0.0802 | 2.1 |
| 4/16/2018 12:27 | 10.8 | 11.4 | 6.6  | 27.7 | 8.9  | 2.4  | 0.0944 | 2.2 |
| 4/16/2018 12:28 | 10.9 | 11.6 | 5.8  | 27.7 | 8.9  | 2.4  | 0.079  | 2.3 |
| 4/16/2018 12:29 | 11   | 11.4 | 7.5  | 27.8 | 8.9  | 2.4  | 0.0835 | 2.4 |



|                 |      |      |     |      |      |      |        |     |
|-----------------|------|------|-----|------|------|------|--------|-----|
| 4/16/2018 12:30 | 10.9 | 11.4 | 6.5 | 27.9 | 8.8  | 2.4  | 0.0898 | 2.5 |
| 4/16/2018 12:31 | 11   | 11.5 | 7.7 | 27.9 | 8.7  | 2.3  | 0.073  | 2.6 |
| 4/16/2018 12:32 | 11.1 | 12.4 | 6.5 | 28.2 | 8.7  | 2.3  | 0.0746 | 2.7 |
| 4/16/2018 12:33 | 11.3 | 11.6 | 5.4 | 28.2 | 8.6  | 2.3  | 0.0595 | 2.9 |
| 4/16/2018 12:34 | 11.4 | 12.4 | 6.3 | 28.1 | 8.6  | 2.3  | 0.0701 | 3   |
| 4/16/2018 12:35 | 11.5 | 12.1 | 6   | 28.2 | 8.6  | 2.3  | 0.0616 | 3.2 |
| 4/16/2018 12:36 | 11.5 | 12.3 | 7.5 | 28.4 | 8.5  | 2.3  | 0.0643 | 3.2 |
| 4/16/2018 12:37 | 11.5 | 11.9 | 5.4 | 28.4 | 8.5  | 2.3  | 0.0623 | 3.3 |
| 4/16/2018 12:38 | 11.5 | 12.2 | 7.2 | 28.3 | 8.5  | 2.3  | 0.0508 | 3.2 |
| 4/16/2018 12:39 | 11.6 | 12.6 | 7.7 | 28.8 | 8.4  | 2.3  | 0.0659 | 3   |
| 4/16/2018 12:40 | 11.8 | 12.4 | 7.9 | 28.8 | 8.3  | 2.3  | 0.0511 | 3   |
| 4/16/2018 12:41 | 11.9 | 12.4 | 7   | 28.6 | 8.3  | 2.3  | 0.0595 | 2.7 |
| 4/16/2018 12:42 | 11.9 | 12.2 | 6.9 | 28.7 | 8.3  | 2.2  | 0.0456 | 2.5 |
| 4/16/2018 12:43 | 11.8 | 12.2 | 7.4 | 28.9 | 8.3  | 2.2  | 0.0547 | 2.6 |
| 4/16/2018 12:44 | 12   | 12.4 | 8.2 | 29.1 | 8.5  | 2.2  | 0.044  | 2.8 |
| 4/16/2018 12:45 | 12.1 | 12.9 | 6.7 | 28.6 | 8.5  | 2.2  | 0.0429 | 3.1 |
| 4/16/2018 12:46 | 12.1 | 12.6 | 7.2 | 28.6 | 8.5  | 2.2  | 0.0461 | 3.2 |
| 4/16/2018 12:47 | 12   | 12.4 | 7.7 | 28.6 | 8.5  | 2.2  | 0.0316 | 3.3 |
| 4/16/2018 12:48 | 12   | 13   | 6.9 | 28.5 | 8.5  | 2.2  | 0.0532 | 3.3 |
| 4/16/2018 12:49 | 11.9 | 11.5 | 7.4 | 28.8 | 8.4  | 2.2  | 0.0316 | 3.3 |
| 4/16/2018 12:50 | 11.9 | 12.1 | 8.7 | 29   | 8.4  | 2.2  | 0.0391 | 3.3 |
| 4/16/2018 12:51 | 11.9 | 12.8 | 8.9 | 28.8 | 8.4  | 2.2  | 0.0362 | 3.3 |
| 4/16/2018 12:52 | 12   | 12.2 | 7.8 | 29.1 | 8.3  | 2.2  | 0.0292 | 3.2 |
| 4/16/2018 12:53 | 12   | 12.3 | 6.9 | 28.8 | 8.3  | 2.2  | 0.0282 | 3.4 |
| 4/16/2018 12:54 | 12   | 11.7 | 6.3 | 28.9 | 8.3  | 2.2  | 0.0245 | 3.5 |
| 4/16/2018 12:55 | 12.1 | 12.6 | 6.5 | 29.3 | 8.3  | 2.2  | 0.0374 | 3.5 |
| 4/16/2018 12:56 | 12.1 | 12.2 | 7.7 | 28.5 | 8.2  | 2.2  | 0.0153 | 3.6 |
| 4/16/2018 12:57 | 11.8 | 11.2 | 6.2 | 27.8 | 8.1  | 2.2  | 0.0287 | 3.7 |
| 4/16/2018 12:58 | 11.4 | 11   | 7.1 | 28.1 | 8    | 2.2  | 0.0325 | 3.8 |
| 4/16/2018 12:59 | 11.1 | 11.6 | 6.8 | 27.9 | 8.1  | 2.2  | 0.0256 | 3.8 |
| 4/16/2018 13:00 | 10.9 | 11.1 | 7.2 | 28   | 8.1  | 2.2  | 0.0349 | 3.7 |
| 4/16/2018 13:01 | 10.8 | 10.9 | 7.2 | 27.4 | 8    | 2.3  | 0.0288 | 3.7 |
| 4/16/2018 13:02 | 10.5 | 10.3 | 6   | 27   | 8    | 2.3  | 0.0359 | 3.7 |
| 4/16/2018 13:03 | 9.4  | 6.5  | 4.1 | 25   | 13.3 | 13.1 | 0.0809 | 3.9 |
| 4/16/2018 13:04 | 7.3  | 3.7  | 3.1 | 23.8 | 23.1 | 28.1 | 0.2712 | 3.9 |
| 4/16/2018 13:05 | 4.7  | 1.8  | 2.4 | 23.7 | 28   | 34.3 | 0.411  | 3.9 |
| 4/16/2018 13:06 | 2.5  | 1.5  | 3.1 | 24.7 | 30.7 | 36.8 | 0.5936 | 3.9 |
| 4/16/2018 13:07 | 1.2  | 1.2  | 2.8 | 25.3 | 30.4 | 36.3 | 0.7667 | 3.3 |
| 4/16/2018 13:08 | 0.8  | 0.8  | 1.5 | 25   | 29   | 36   | 0.8203 | 3.5 |
| 4/16/2018 13:09 | 0.6  | 0.8  | 2.2 | 24.9 | 29.6 | 35.9 | 0.9905 | 3.7 |
| 4/16/2018 13:10 | 0.5  | 1    | 1.8 | 24.9 | 29.6 | 35.8 | 1.0214 | 3.7 |
| 4/16/2018 13:11 | 0.4  | 0.9  | 2   | 24.7 | 29.3 | 35.6 | 1.0865 | 3.7 |
| 4/16/2018 13:12 | 0.3  | 0.3  | 0.7 | 24.9 | 29.3 | 35.4 | 1.1185 | 3.8 |
| 4/16/2018 13:13 | 0.3  | 1.2  | 2.5 | 24.5 | 29.2 | 35.1 | 1.1215 | 3.9 |
| 4/16/2018 13:14 | 0.3  | 0.7  | 1   | 24.2 | 27.8 | 34.8 | 1.1573 | 4.1 |
| 4/16/2018 13:15 | 0.3  | 0.5  | 3.2 | 24.1 | 27.2 | 34.3 | 1.1882 | 4.1 |
| 4/16/2018 13:16 | 0.3  | 0.7  | 2.8 | 23.8 | 26.7 | 34.1 | 1.163  | 4.1 |

|                 |     |      |     |      |      |      |        |     |
|-----------------|-----|------|-----|------|------|------|--------|-----|
| 4/16/2018 13:17 | 0.3 | 0.2  | 1.3 | 23.9 | 26.4 | 33.7 | 1.1708 | 4.2 |
| 4/16/2018 13:18 | 0.3 | 0.6  | 2.9 | 23.5 | 26.1 | 33.3 | 1.1828 | 4.1 |
| 4/16/2018 13:19 | 0.4 | 0.5  | 2.6 | 23.1 | 25.3 | 32.8 | 1.1677 | 4.2 |
| 4/16/2018 13:20 | 0.3 | 0.7  | 2.5 | 22.9 | 25.1 | 32.3 | 1.1448 | 4.3 |
| 4/16/2018 13:21 | 0.4 | 0.4  | 3   | 22.7 | 24.5 | 31.8 | 1.1252 | 4.2 |
| 4/16/2018 13:22 | 0.3 | 1.1  | 2.2 | 22.9 | 24.5 | 31.4 | 1.1402 | 4.1 |
| 4/16/2018 13:23 | 0.3 | 0.6  | 2.9 | 22.8 | 24.3 | 31.1 | 1.1275 | 4   |
| 4/16/2018 13:24 | 0.2 | -0.1 | 1.7 | 22.6 | 23.9 | 30.7 | 1.1252 | 4   |
| 4/16/2018 13:25 | 0.2 | 0.8  | 2   | 22.5 | 23.7 | 30.4 | 1.0988 | 3.8 |
| 4/16/2018 13:26 | 0.2 | 0.8  | 1.2 | 22.5 | 23.4 | 30   | 1.0838 | 3.7 |
| 4/16/2018 13:27 | 0.2 | 0.2  | 2.6 | 22.4 | 23   | 29.6 | 1.0553 | 3.8 |
| 4/16/2018 13:28 | 0.3 | 1    | 3.8 | 22.2 | 22.3 | 29.3 | 1.0427 | 3.4 |
| 4/16/2018 13:29 | 0.3 | 0.9  | 1.5 | 21.9 | 22.4 | 28.9 | 1.0333 | 3.4 |
| 4/16/2018 13:30 | 0.4 | 0.9  | 3.3 | 22   | 21.5 | 28.5 | 0.9844 | 3.5 |
| 4/16/2018 13:31 | 0.4 | 0.5  | 1.3 | 21.9 | 21.9 | 28.1 | 1.0275 | 3.6 |
| 4/16/2018 13:32 | 0.4 | 1.4  | 3.5 | 21.9 | 21.8 | 27.8 | 0.9992 | 3.6 |
| 4/16/2018 13:33 | 0.3 | 1    | 1.5 | 21.7 | 21.3 | 27.4 | 0.9863 | 3.7 |
| 4/16/2018 13:34 | 0.3 | 1.1  | 2.8 | 21.9 | 21.3 | 27   | 0.9913 | 3.7 |
| 4/16/2018 13:35 | 0.3 | 0.3  | 2.3 | 21.8 | 21.2 | 26.7 | 0.9938 | 3.8 |
| 4/16/2018 13:36 | 0.3 | 1    | 3.4 | 21.5 | 20.7 | 26.5 | 0.956  | 3.8 |
| 4/16/2018 13:37 | 0.3 | 0.3  | 0.9 | 21.6 | 20.7 | 26.3 | 0.9613 | 3.7 |
| 4/16/2018 13:38 | 0.3 | 0.9  | 3.7 | 21.6 | 20.4 | 26.1 | 0.9586 | 3.8 |
| 4/16/2018 13:39 | 0.3 | 0.4  | 2.2 | 21.2 | 20.3 | 26   | 0.9342 | 3.9 |
| 4/16/2018 13:40 | 0.3 | 0.8  | 2.2 | 21.5 | 19.9 | 25.7 | 0.9236 | 4   |
| 4/16/2018 13:41 | 0.4 | 0.9  | 2.1 | 21.2 | 19.4 | 25.4 | 0.8836 | 4   |
| 4/16/2018 13:42 | 0.4 | 0.2  | 3   | 21.3 | 19.5 | 25.1 | 0.9091 | 4.1 |
| 4/16/2018 13:43 | 0.5 | 0.6  | 2.7 | 21.3 | 19.3 | 24.8 | 0.899  | 4.2 |
| 4/16/2018 13:44 | 0.4 | 0.9  | 1.8 | 21.1 | 19.2 | 24.5 | 0.891  | 4.1 |
| 4/16/2018 13:45 | 0.4 | 0.9  | 1.3 | 21.1 | 19   | 24.2 | 0.8879 | 4.1 |
| 4/16/2018 13:46 | 0.4 | 1.2  | 2.3 | 21.2 | 19   | 24   | 0.884  | 4.1 |
| 4/16/2018 13:47 | 0.5 | 1.4  | 1.9 | 21.1 | 18.2 | 23.6 | 0.8214 | 4.1 |
| 4/16/2018 13:48 | 0.6 | 0.9  | 2.7 | 21   | 18.1 | 23.3 | 0.8331 | 4.1 |
| 4/16/2018 13:49 | 0.6 | 1    | 1.7 | 21.1 | 18.2 | 23   | 0.8424 | 4.1 |
| 4/16/2018 13:50 | 0.6 | 0.7  | 2.7 | 20.9 | 18.2 | 22.8 | 0.8506 | 4   |
| 4/16/2018 13:51 | 0.6 | 0.9  | 2.2 | 21   | 17.7 | 22.5 | 0.814  | 3.5 |
| 4/16/2018 13:52 | 0.7 | 1    | 3.2 | 21   | 17.3 | 22.2 | 0.7884 | 3.4 |
| 4/16/2018 13:53 | 0.8 | 0.9  | 2.1 | 20.8 | 17.1 | 21.9 | 0.7803 | 3.6 |
| 4/16/2018 13:54 | 0.7 | 0.9  | 2.1 | 20.7 | 17.5 | 21.6 | 0.8163 | 3.6 |
| 4/16/2018 13:55 | 0.7 | 1.5  | 2.1 | 20.8 | 17   | 21.3 | 0.7769 | 3.6 |
| 4/16/2018 13:56 | 0.6 | 0.2  | 1.9 | 20.8 | 17.2 | 21.2 | 0.7978 | 3.7 |
| 4/16/2018 13:57 | 0.7 | 0.6  | 1.6 | 21.1 | 16.9 | 21.1 | 0.7821 | 3.9 |
| 4/16/2018 13:58 | 0.7 | 1    | 2   | 20.4 | 17   | 20.9 | 0.7872 | 4   |
| 4/16/2018 13:59 | 0.6 | 0.7  | 1.7 | 20.6 | 16.9 | 20.7 | 0.7889 | 3.9 |
| 4/16/2018 14:00 | 0.7 | 1.2  | 4   | 20.8 | 16.2 | 20.5 | 0.7382 | 4   |
| 4/16/2018 14:01 | 0.7 | 1    | 1.1 | 20.9 | 16   | 20.4 | 0.7352 | 4   |
| 4/16/2018 14:02 | 0.7 | 1    | 2.1 | 20.7 | 16.3 | 20.2 | 0.7717 | 4   |
| 4/16/2018 14:03 | 0.6 | 0.4  | 2.2 | 20.7 | 16.2 | 20.1 | 0.7443 | 4.1 |

|                 |      |      |     |      |      |      |        |     |
|-----------------|------|------|-----|------|------|------|--------|-----|
| 4/16/2018 14:04 | 0.6  | 1.1  | 3.6 | 20.9 | 15.8 | 19.9 | 0.7281 | 4   |
| 4/16/2018 14:05 | 0.6  | 0.7  | 1.5 | 20.6 | 15.8 | 19.7 | 0.7155 | 4   |
| 4/16/2018 14:06 | 0.7  | 0.8  | 3.1 | 20.6 | 15.4 | 19.4 | 0.696  | 4   |
| 4/16/2018 14:07 | 0.8  | 0.9  | 2.5 | 20.8 | 15.2 | 19.2 | 0.6861 | 4   |
| 4/16/2018 14:08 | 0.8  | 0.8  | 1.6 | 20.6 | 15.3 | 19   | 0.6941 | 4   |
| 4/16/2018 14:09 | 0.8  | 1.1  | 2.9 | 20.7 | 14.8 | 18.7 | 0.667  | 4.1 |
| 4/16/2018 14:10 | 0.9  | 1.3  | 2.7 | 20.5 | 14.9 | 18.5 | 0.6688 | 4.1 |
| 4/16/2018 14:11 | 0.9  | 0.7  | 2.7 | 20.7 | 14.9 | 18.2 | 0.6828 | 4   |
| 4/16/2018 14:12 | 0.8  | 1    | 2   | 20.5 | 15   | 18   | 0.6751 | 4   |
| 4/16/2018 14:13 | 0.8  | 1.9  | 2.6 | 20.6 | 15   | 17.6 | 0.6323 | 3.9 |
| 4/16/2018 14:14 | 0.9  | 1.4  | 2.7 | 20.8 | 14.9 | 17.4 | 0.6437 | 3.9 |
| 4/16/2018 14:15 | 1    | 1.5  | 2.4 | 20.2 | 14.7 | 17.2 | 0.6412 | 3.9 |
| 4/16/2018 14:16 | 0.9  | 0.5  | 2.6 | 20.4 | 14.7 | 17   | 0.6708 | 3.9 |
| 4/16/2018 14:17 | 0.6  | 1.5  | 1.8 | 19.9 | 14.8 | 16.9 | 0.6578 | 3.9 |
| 4/16/2018 14:18 | 0.6  | 0.3  | 1.9 | 20.5 | 14.4 | 16.8 | 0.6501 | 3.9 |
| 4/16/2018 14:19 | 0.6  | 0.5  | 3.8 | 20.2 | 14.2 | 16.5 | 0.628  | 3.9 |
| 4/16/2018 14:20 | 0.8  | 1.7  | 0.8 | 20.4 | 14   | 16.3 | 0.6047 | 3.9 |
| 4/16/2018 14:21 | 1.1  | 1.4  | 2.2 | 20.4 | 13.4 | 16.1 | 0.5667 | 3.9 |
| 4/16/2018 14:22 | 1.8  | 3.6  | 4.3 | 22.5 | 12.7 | 15.7 | 0.4957 | 3.9 |
| 4/16/2018 14:23 | 3.8  | 8.3  | 5.6 | 24.8 | 9.9  | 14.4 | 0.2855 | 3.9 |
| 4/16/2018 14:24 | 5.9  | 8.5  | 5.4 | 25.6 | 9.2  | 13.4 | 0.2271 | 3.7 |
| 4/16/2018 14:25 | 7.8  | 9    | 6.1 | 25.7 | 8.9  | 11.9 | 0.2146 | 3.6 |
| 4/16/2018 14:26 | 8    | 7.3  | 4.9 | 25.3 | 8.7  | 10.4 | 0.1899 | 3.7 |
| 4/16/2018 14:27 | 7.8  | 8.3  | 5.6 | 25   | 8.5  | 9.1  | 0.1989 | 3.8 |
| 4/16/2018 14:28 | 7.7  | 8.3  | 6.1 | 25.1 | 8.3  | 7.9  | 0.1773 | 3.9 |
| 4/16/2018 14:29 | 7.8  | 9.1  | 5.9 | 25.9 | 8.2  | 6.6  | 0.1658 | 3.8 |
| 4/16/2018 14:30 | 8.3  | 8.8  | 8.3 | 26.1 | 8.1  | 5.3  | 0.1726 | 3.8 |
| 4/16/2018 14:31 | 8.7  | 9.8  | 6.8 | 26.7 | 7.9  | 4.7  | 0.1381 | 4.5 |
| 4/16/2018 14:32 | 9    | 9.1  | 5.9 | 26.2 | 8.5  | 4.4  | 0.1557 | 4.8 |
| 4/16/2018 14:33 | 9    | 8.5  | 5.3 | 26.2 | 9.3  | 4.2  | 0.1713 | 3.8 |
| 4/16/2018 14:34 | 8.9  | 8.8  | 6.3 | 26.5 | 9    | 4    | 0.1678 | 3.8 |
| 4/16/2018 14:35 | 9    | 10.6 | 7.9 | 27   | 9.1  | 3.9  | 0.1525 | 3.9 |
| 4/16/2018 14:36 | 9.6  | 10.7 | 6.9 | 27.8 | 8.1  | 3.7  | 0.119  | 3.9 |
| 4/16/2018 14:37 | 10   | 10.5 | 5.5 | 27.2 | 8    | 3.6  | 0.1234 | 3.8 |
| 4/16/2018 14:38 | 10.4 | 10.8 | 7.4 | 28   | 7.9  | 3.4  | 0.0829 | 3.6 |
| 4/16/2018 14:39 | 10.6 | 11.2 | 5   | 28.1 | 7.7  | 3.3  | 0.0945 | 3.6 |
| 4/16/2018 14:40 | 10.9 | 11.4 | 6.4 | 28.1 | 7.9  | 3.2  | 0.108  | 3.8 |
| 4/16/2018 14:41 | 11.4 | 12.4 | 7.4 | 29.7 | 7.5  | 3.1  | 0.0983 | 3.9 |
| 4/16/2018 14:42 | 12.1 | 13.5 | 7.9 | 29.7 | 7.1  | 3    | 0.0843 | 3.8 |
| 4/16/2018 14:43 | 12.3 | 12.5 | 7.3 | 29.6 | 7.5  | 2.8  | 0.0872 | 3.6 |
| 4/16/2018 14:44 | 12.5 | 12.8 | 7.3 | 29.8 | 7    | 2.7  | 0.0884 | 3.7 |
| 4/16/2018 14:45 | 12.4 | 13.1 | 8   | 29.5 | 6.8  | 2.7  | 0.0643 | 3.8 |
| 4/16/2018 14:46 | 12.7 | 13.5 | 8   | 30   | 6.6  | 2.6  | 0.0776 | 3.9 |
| 4/16/2018 14:47 | 12.9 | 13.5 | 9.3 | 30.3 | 6.2  | 2.6  | 0.0656 | 3.9 |
| 4/16/2018 14:48 | 12.9 | 12.7 | 6.8 | 29.6 | 6.5  | 2.5  | 0.0736 | 3.9 |
| 4/16/2018 14:49 | 12.7 | 12.7 | 7.9 | 30.1 | 6.9  | 2.4  | 0.0728 | 3.9 |
| 4/16/2018 14:50 | 12.8 | 14.3 | 8.2 | 30.6 | 6.1  | 2.4  | 0.0518 | 3.9 |

|                 |      |      |     |      |      |      |        |     |
|-----------------|------|------|-----|------|------|------|--------|-----|
| 4/16/2018 14:51 | 13   | 13.5 | 7.8 | 30   | 6.1  | 2.3  | 0.0567 | 4   |
| 4/16/2018 14:52 | 13.1 | 12.9 | 6.5 | 29.9 | 6.3  | 2.3  | 0.0554 | 4.1 |
| 4/16/2018 14:53 | 12.8 | 13.2 | 8.7 | 30.1 | 6.3  | 2.3  | 0.071  | 4   |
| 4/16/2018 14:54 | 12.5 | 12.9 | 7.7 | 29.7 | 6.3  | 2.3  | 0.0512 | 4.1 |
| 4/16/2018 14:55 | 12.3 | 11.7 | 7.8 | 28.8 | 6.6  | 2.3  | 0.0722 | 4.1 |
| 4/16/2018 14:56 | 11.9 | 11.7 | 5.7 | 28.7 | 6.9  | 2.3  | 0.0798 | 4.1 |
| 4/16/2018 14:57 | 10.8 | 8.4  | 4.1 | 27.4 | 11.5 | 8    | 0.1211 | 4   |
| 4/16/2018 14:58 | 8.6  | 5.1  | 4.4 | 36   | 23.7 | 24.7 | 0.4814 | 4   |
| 4/16/2018 14:59 | 5.5  | 1.5  | 4   | 40.4 | 31.4 | 30.4 | 0.9323 | 4.1 |
| 4/16/2018 15:00 | 2.8  | 2    | 4   | 40.5 | 34   | 33.7 | 1.1593 | 4   |
| 4/16/2018 15:01 | 1.3  | 1.6  | 2.6 | 40   | 34.3 | 34.2 | 1.1983 | 4.1 |
| 4/16/2018 15:02 | 0.8  | 0.2  | 4.2 | 38.7 | 33.7 | 34   | 1.195  | 4.1 |
| 4/16/2018 15:03 | 0.6  | 0.9  | 2.2 | 37.6 | 32.8 | 33.6 | 1.1607 | 4   |
| 4/16/2018 15:04 | 0.4  | 1    | 2.1 | 36.7 | 32.6 | 33.1 | 1.131  | 3.9 |
| 4/16/2018 15:05 | 0.4  | 0.9  | 4.2 | 35.3 | 30.7 | 32.3 | 1.055  | 3.9 |
| 4/16/2018 15:06 | 0.5  | 0.7  | 1.8 | 35   | 30.4 | 31.6 | 1.0445 | 3.8 |
| 4/16/2018 15:07 | 0.6  | 1.1  | 3.3 | 33.1 | 29   | 30.7 | 0.9881 | 3.8 |
| 4/16/2018 15:08 | 0.7  | 1.2  | 2.1 | 32.8 | 28.4 | 29.7 | 0.9695 | 3.8 |
| 4/16/2018 15:09 | 0.8  | 1.2  | 1.8 | 32.7 | 27.8 | 28.8 | 0.9583 | 3.7 |
| 4/16/2018 15:10 | 0.6  | 0.7  | 3   | 32.5 | 28.7 | 27.9 | 0.9934 | 3.7 |
| 4/16/2018 15:11 | 0.6  | 1.3  | 3.7 | 30.8 | 27.1 | 27.1 | 0.9055 | 3.7 |
| 4/16/2018 15:12 | 0.6  | 1.3  | 2.6 | 30.6 | 26.5 | 26.2 | 0.907  | 3.6 |
| 4/16/2018 15:13 | 0.7  | 1.1  | 2.3 | 30.6 | 26.2 | 25.6 | 0.891  | 3.6 |
| 4/16/2018 15:14 | 0.7  | 1    | 3.2 | 29.9 | 26.7 | 25.1 | 0.8858 | 3.6 |
| 4/16/2018 15:15 | 0.7  | 1.1  | 3.6 | 29.9 | 26.7 | 24.6 | 0.8935 | 3.7 |
| 4/16/2018 15:16 | 0.6  | 0.7  | 3.3 | 29.1 | 25.9 | 24.2 | 0.8692 | 3.8 |
| 4/16/2018 15:17 | 0.7  | 0.3  | 3.6 | 28.7 | 24.4 | 23.8 | 0.837  | 3.8 |
| 4/16/2018 15:18 | 0.7  | 0.7  | 3.5 | 28.5 | 24.7 | 23.3 | 0.8384 | 3.9 |
| 4/16/2018 15:19 | 0.7  | 0.9  | 2.7 | 28.5 | 24.8 | 22.9 | 0.8593 | 3.8 |
| 4/16/2018 15:20 | 0.6  | 1.9  | 2.4 | 28   | 24.3 | 22.6 | 0.8164 | 3.8 |
| 4/16/2018 15:21 | 0.8  | 1.6  | 6.1 | 27   | 22.9 | 22.2 | 0.7802 | 3.8 |
| 4/16/2018 15:22 | 0.8  | 1.1  | 3.2 | 27.7 | 23.5 | 21.8 | 0.8102 | 3.7 |
| 4/16/2018 15:23 | 0.8  | 0.2  | 3.5 | 27   | 23.5 | 21.5 | 0.8022 | 3.8 |
| 4/16/2018 15:24 | 0.7  | 0.3  | 1.6 | 27   | 23.5 | 21   | 0.8059 | 3.8 |
| 4/16/2018 15:25 | 0.6  | 0.7  | 1.7 | 26.8 | 23   | 20.7 | 0.7827 | 4   |
| 4/16/2018 15:26 | 0.7  | 0.8  | 3.8 | 26.1 | 22.3 | 20.4 | 0.7598 | 4   |
| 4/16/2018 15:27 | 0.9  | 1.6  | 1   | 26   | 21.4 | 19.9 | 0.7358 | 4   |
| 4/16/2018 15:28 | 0.9  | 1.2  | 2.6 | 25.6 | 21.9 | 19.5 | 0.7493 | 4.1 |
| 4/16/2018 15:29 | 0.9  | 0.5  | 2.4 | 25.6 | 20.8 | 19.1 | 0.7183 | 4.1 |
| 4/16/2018 15:30 | 0.9  | 1.7  | 2.1 | 25.3 | 20.3 | 18.7 | 0.6814 | 4   |
| 4/16/2018 15:31 | 0.9  | 1.1  | 2.8 | 25.7 | 21.1 | 18.4 | 0.7361 | 4   |
| 4/16/2018 15:32 | 0.9  | 1.6  | 2.8 | 25.1 | 21.2 | 18.2 | 0.7196 | 3.9 |
| 4/16/2018 15:33 | 0.9  | 1.5  | 3.8 | 24.3 | 19.7 | 17.7 | 0.6563 | 3.9 |
| 4/16/2018 15:34 | 1.1  | 0.4  | 3   | 24.9 | 19.2 | 17.3 | 0.6615 | 3.9 |
| 4/16/2018 15:35 | 1.2  | 1.4  | 3.2 | 24.6 | 20.2 | 17.1 | 0.6904 | 3.9 |
| 4/16/2018 15:36 | 1.1  | 1.5  | 2.7 | 24.3 | 19.4 | 16.8 | 0.6578 | 3.8 |
| 4/16/2018 15:37 | 1.1  | 2    | 2.6 | 24.3 | 19.1 | 16.5 | 0.6389 | 3.8 |

|                 |      |      |      |      |      |      |        |     |
|-----------------|------|------|------|------|------|------|--------|-----|
| 4/16/2018 15:38 | 1    | 1    | 3.6  | 24.5 | 19.3 | 16.3 | 0.6701 | 3.7 |
| 4/16/2018 15:39 | 1    | 0.5  | 2.8  | 24.4 | 19.3 | 16.2 | 0.6501 | 3.8 |
| 4/16/2018 15:40 | 1    | 1.2  | 2.6  | 24   | 19.1 | 15.9 | 0.6438 | 3.7 |
| 4/16/2018 15:41 | 0.9  | 0.7  | 0.8  | 24   | 19.4 | 15.8 | 0.6587 | 3.8 |
| 4/16/2018 15:42 | 0.8  | 1.5  | 2.6  | 23.7 | 19   | 15.8 | 0.6563 | 3.5 |
| 4/16/2018 15:43 | 0.8  | 1    | 3.1  | 23.7 | 18.6 | 15.5 | 0.6315 | 3.2 |
| 4/16/2018 15:44 | 1    | 1.2  | 2.5  | 23.9 | 17.5 | 15.2 | 0.5805 | 3.3 |
| 4/16/2018 15:45 | 1.1  | 1.4  | 1.7  | 23.3 | 18.4 | 15   | 0.6396 | 3.6 |
| 4/16/2018 15:46 | 1.2  | 1.9  | 2.8  | 23.3 | 17.3 | 14.8 | 0.5664 | 3.8 |
| 4/16/2018 15:47 | 1.1  | 1.4  | 2.3  | 23.3 | 17.9 | 14.6 | 0.5975 | 3.9 |
| 4/16/2018 15:48 | 1.2  | 1.3  | 1.6  | 23.2 | 17.5 | 14.3 | 0.5924 | 4   |
| 4/16/2018 15:49 | 1.2  | 1.6  | 3    | 23   | 17.3 | 14   | 0.58   | 4   |
| 4/16/2018 15:50 | 1.3  | 1.8  | 2.3  | 23.2 | 16.7 | 13.7 | 0.5645 | 4.1 |
| 4/16/2018 15:51 | 1.2  | 1.5  | 2.3  | 23.2 | 17.3 | 13.5 | 0.5797 | 4.1 |
| 4/16/2018 15:52 | 1.2  | 2    | 1.5  | 23   | 17.1 | 13.4 | 0.5858 | 4.1 |
| 4/16/2018 15:53 | 1    | 1.3  | 1.9  | 22.9 | 17.3 | 13.3 | 0.5874 | 4.1 |
| 4/16/2018 15:54 | 1    | 1.4  | 3.4  | 22.8 | 16.5 | 13.1 | 0.5595 | 4.2 |
| 4/16/2018 15:55 | 0.9  | 2.1  | 2.1  | 22.7 | 16.7 | 12.9 | 0.5736 | 4.2 |
| 4/16/2018 15:56 | 1.1  | 1.8  | 1.5  | 22.8 | 15.5 | 12.7 | 0.5067 | 4.2 |
| 4/16/2018 15:57 | 1.1  | 1    | 2.7  | 22.9 | 16   | 12.5 | 0.5399 | 4.2 |
| 4/16/2018 15:58 | 1.2  | 2    | 2.5  | 22.4 | 16.2 | 12.3 | 0.5349 | 4.2 |
| 4/16/2018 15:59 | 1.2  | 2.2  | 3.2  | 22.4 | 15.1 | 12   | 0.4966 | 4.2 |
| 4/16/2018 16:00 | 1.2  | 1.3  | 2.9  | 22.5 | 15.7 | 11.8 | 0.5295 | 4.1 |
| 4/16/2018 16:01 | 1.2  | 1.6  | 2.7  | 22.3 | 15.6 | 11.6 | 0.5141 | 3.4 |
| 4/16/2018 16:02 | 1.1  | 1.2  | 2.7  | 22.3 | 15   | 11.4 | 0.5084 | 3.3 |
| 4/16/2018 16:03 | 1.1  | 2    | 3    | 22.3 | 15   | 11.2 | 0.4922 | 3.3 |
| 4/16/2018 16:04 | 1.2  | 1.9  | 2.3  | 22.3 | 14.9 | 11   | 0.4906 | 3.5 |
| 4/16/2018 16:05 | 1.2  | 2.1  | 1.1  | 22.4 | 14.9 | 10.9 | 0.4968 | 3.8 |
| 4/16/2018 16:06 | 1.3  | 2.3  | 4    | 22.3 | 14.7 | 10.7 | 0.4724 | 3.2 |
| 4/16/2018 16:07 | 1.2  | 1.6  | 2.9  | 22.1 | 14.6 | 10.6 | 0.4895 | 2.2 |
| 4/16/2018 16:08 | 1.3  | 2.3  | 2.1  | 22   | 14.2 | 10.4 | 0.4492 | 2.4 |
| 4/16/2018 16:09 | 1.2  | 1.2  | 4.1  | 22   | 14.8 | 10.3 | 0.5003 | 2.8 |
| 4/16/2018 16:10 | 1.4  | 1.7  | 3    | 22.1 | 13.7 | 10.2 | 0.438  | 3   |
| 4/16/2018 16:11 | 1.4  | 2.4  | 3.8  | 22.1 | 13.5 | 10   | 0.4371 | 3.1 |
| 4/16/2018 16:12 | 1.6  | 1.1  | 1.5  | 22   | 13.9 | 9.8  | 0.4618 | 3.1 |
| 4/16/2018 16:13 | 2.2  | 4.5  | 4.8  | 23   | 11.6 | 9.5  | 0.3207 | 3.2 |
| 4/16/2018 16:14 | 3.7  | 7.4  | 7    | 25.6 | 10.2 | 9    | 0.2742 | 3.3 |
| 4/16/2018 16:15 | 6.2  | 10   | 6.9  | 26.9 | 9.8  | 8.3  | 0.1858 | 3.4 |
| 4/16/2018 16:16 | 8    | 10.8 | 5.5  | 27   | 9.8  | 7.7  | 0.1906 | 3.4 |
| 4/16/2018 16:17 | 9    | 10   | 6.2  | 27.4 | 8.8  | 6.9  | 0.1657 | 3.6 |
| 4/16/2018 16:18 | 9.2  | 10.3 | 6.4  | 27.7 | 8.3  | 6.1  | 0.1458 | 3.8 |
| 4/16/2018 16:19 | 9.6  | 10.9 | 4.5  | 27.8 | 8.3  | 5.5  | 0.1529 | 3.9 |
| 4/16/2018 16:20 | 9.3  | 8.9  | 4.7  | 26.7 | 8.9  | 4.8  | 0.18   | 4   |
| 4/16/2018 16:21 | 9.3  | 11.3 | 5.7  | 27.7 | 7.8  | 4.2  | 0.135  | 4.2 |
| 4/16/2018 16:22 | 9.6  | 11.5 | 5.5  | 28.1 | 7    | 3.7  | 0.1132 | 4.3 |
| 4/16/2018 16:23 | 10.3 | 11.1 | 8.2  | 29.3 | 6.6  | 3.4  | 0.1063 | 4.2 |
| 4/16/2018 16:24 | 10.9 | 13.4 | 15.6 | 27.5 | 6.6  | 3.2  | 0.1122 | 3.7 |

|                 |      |      |      |      |     |     |         |     |
|-----------------|------|------|------|------|-----|-----|---------|-----|
| 4/16/2018 16:25 | 12   | 12.8 | 12.5 | 18.2 | 6.6 | 3.1 | 0.1019  | 2.5 |
| 4/16/2018 16:26 |      |      |      |      | 6.5 | 3   | 0.1086  | 2.4 |
| 4/16/2018 16:27 |      |      |      |      | 6.3 | 2.9 | 0.0856  | 2.2 |
| 4/16/2018 16:28 |      |      |      |      | 6.3 | 2.8 | 0.105   | 2.2 |
| 4/16/2018 16:29 |      |      |      |      | 6.2 | 2.6 | 0.0838  | 2.2 |
| 4/16/2018 16:30 |      |      |      |      | 6.2 | 2.6 | 0.0872  | 2.2 |
| 4/16/2018 16:31 |      |      |      |      | 6   | 2.6 | 0.0888  | 2.1 |
| 4/16/2018 16:32 |      |      |      |      | 5.8 | 2.5 | 0.0682  | 2.2 |
| 4/16/2018 16:33 |      |      |      |      | 5.8 | 2.4 | 0.0755  | 2.3 |
| 4/16/2018 16:34 |      |      |      |      | 6.1 | 2.4 | 0.0631  | 2.4 |
| 4/16/2018 16:35 |      |      |      |      | 6   | 2.3 | 0.0673  | 2.5 |
| 4/16/2018 16:36 |      |      |      |      | 5.9 | 2.2 | 0.055   | 2.5 |
| 4/16/2018 16:37 |      |      |      |      | 6   | 2.2 | 0.0517  | 2.5 |
| 4/16/2018 16:38 |      |      |      |      | 5.7 | 2.1 | 0.0483  | 2.6 |
| 4/16/2018 16:39 |      |      |      |      | 5.7 | 2.1 | 0.0363  | 2.6 |
| 4/16/2018 16:40 |      |      |      |      | 5.6 | 2   | 0.0524  | 2.6 |
| 4/16/2018 16:41 |      |      |      |      | 5.4 | 2   | 0.0378  | 2.7 |
| 4/16/2018 16:42 |      |      |      |      | 5.3 | 2   | 0.0556  | 2.7 |
| 4/16/2018 16:43 |      |      |      |      | 5.4 | 1.9 | 0.0376  | 2.7 |
| 4/16/2018 16:44 |      |      |      |      | 5.2 | 1.9 | 0.0406  | 2.7 |
| 4/16/2018 16:45 |      |      |      |      | 5.2 | 1.9 | 0.0354  | 2.7 |
| 4/16/2018 16:46 |      |      |      |      | 5.2 | 1.9 | 0.0324  | 2.7 |
| 4/16/2018 16:47 |      |      |      |      | 5.1 | 1.8 | 0.0329  | 2.7 |
| 4/16/2018 16:48 |      |      |      |      | 5.1 | 1.8 | 0.0209  | 2.7 |
| 4/16/2018 16:49 |      |      |      |      | 5   | 1.8 | 0.0306  | 2.7 |
| 4/16/2018 16:50 |      |      |      |      | 4.9 | 1.8 | 0.0121  | 2.7 |
| 4/16/2018 16:51 |      |      |      |      | 4.9 | 1.8 | 0.0229  | 2.7 |
| 4/16/2018 16:52 |      |      |      |      | 4.8 | 1.8 | 0.0057  | 2.7 |
| 4/16/2018 16:53 |      |      |      |      | 4.8 | 1.8 | -0.0852 | 1.4 |
| 4/16/2018 16:54 |      |      |      |      | 4.7 | 1.7 | -0.1967 | 0.1 |
| 4/16/2018 16:55 | 14.3 | 15.2 | 7.8  | 35.4 | 4.7 | 1.7 | -0.2074 | 0.2 |
| 4/16/2018 16:56 | 14.5 | 14.7 | 8.8  | 33.6 | 4.7 | 1.7 | -0.1847 | 0.2 |
| 4/16/2018 16:57 | 14.7 | 15.1 | 8.4  | 33.3 | 4.6 | 1.7 | -0.2097 | 0.2 |
| 4/16/2018 16:58 | 15   | 15   | 7.2  | 32.7 | 4.6 | 1.6 | -0.1938 | 0.2 |
| 4/16/2018 16:59 | 15.3 | 15.8 | 8.2  | 32.9 | 4.5 | 1.6 | -0.2058 | 0.2 |
| 4/16/2018 17:00 | 15.4 | 15.8 | 9.3  | 32.4 | 4.4 | 1.6 | -0.0968 | 0.2 |
| 4/16/2018 17:01 | 15.4 | 16.7 | 7.7  | 32.8 | 4.3 | 1.6 | 0.0117  | 0.3 |
| 4/16/2018 17:02 | 15.4 | 15.7 | 8.6  | 32.8 | 4.4 | 1.6 | -0.0015 | 0.1 |
| 4/16/2018 17:03 | 15.6 | 15.7 | 8.1  | 33.1 | 4.4 | 1.6 | 0.0151  | 0   |
| 4/16/2018 17:04 | 15.8 | 16.4 | 9.2  | 33.1 | 4.3 | 1.6 | 0.0856  | 1.1 |
| 4/16/2018 17:05 | 16   | 16   | 9.5  | 33.3 | 4.3 | 1.5 | 0.2038  | 2.4 |
| 4/16/2018 17:06 | 16   | 16.6 | 8.8  | 33.2 | 4.2 | 1.5 | 0.2073  | 3   |
| 4/16/2018 17:07 | 15.9 | 16   | 10.2 | 32.8 | 4.2 | 1.5 | 0.2186  | 3.1 |
| 4/16/2018 17:08 | 15.9 | 16.8 | 8.4  | 33.4 | 4.2 | 1.5 | 0.2125  | 2.6 |
| 4/16/2018 17:09 | 16.1 | 16.6 | 9.2  | 33.3 | 4.2 | 1.5 | 0.213   | 2.8 |
| 4/16/2018 17:10 | 16.3 | 16.4 | 7.7  | 33.6 | 4.2 | 1.5 | 0.2146  | 2.9 |
| 4/16/2018 17:11 | 16.5 | 16.2 | 8.3  | 33.7 | 4.2 | 1.5 | 0.2022  | 2.6 |

|                 |      |      |     |      |     |     |        |     |
|-----------------|------|------|-----|------|-----|-----|--------|-----|
| 4/16/2018 17:12 | 16.5 | 16.9 | 9.8 | 33.8 | 4.1 | 1.4 | 0.2145 | 2.3 |
| 4/16/2018 17:13 | 16.5 | 16.6 | 9.4 | 33.2 | 4.1 | 1.4 | 0.204  | 2.8 |
| 4/16/2018 17:14 | 16.5 | 16.6 | 8.5 | 33.7 | 4.1 | 1.4 | 0.2143 | 2.9 |
| 4/16/2018 17:15 | 16.4 | 16.4 | 8.6 | 33.5 | 4.1 | 1.4 | 0.2096 | 2.8 |
| 4/16/2018 17:16 | 16.4 | 16.5 | 8.5 | 33.5 | 4.1 | 1.4 | 0.2087 | 2.9 |
| 4/16/2018 17:17 | 16.4 | 16.6 | 8.9 | 33.9 | 4.1 | 1.4 | 0.2151 | 3   |
| 4/16/2018 17:18 | 16.6 | 17.6 | 8.6 | 33.7 | 4.1 | 1.4 | 0.1949 | 3.1 |
| 4/16/2018 17:19 | 16.6 | 16.7 | 8.1 | 33.4 | 4.1 | 1.4 | 0.2055 | 3.1 |
| 4/16/2018 17:20 | 16   | 15.4 | 7.8 | 33.5 | 4.1 | 1.4 | 0.1988 | 3.2 |
| 4/16/2018 17:21 | 14.6 | 8.5  | 8.8 | 33.8 | 4.1 | 1.4 | 0.204  | 3.2 |
| 4/16/2018 17:22 | 12   | 12.1 | 9.3 | 34   | 4   | 1.4 | 0.203  | 3.2 |
| 4/16/2018 17:23 | 8.4  | 13.7 | 8.6 | 34   | 4   | 1.4 | 0.1946 | 3.3 |
| 4/16/2018 17:24 | 4.8  | 14.9 | 8.9 | 34.1 | 4   | 1.4 | 0.2069 | 3.4 |
| 4/16/2018 17:25 | 2.3  | 13.6 | 8.8 | 32.5 | 4   | 1.4 | 0.1976 | 3.5 |
| 4/16/2018 17:26 | 1.1  | 12.9 | 8.8 | 32.2 | 4   | 1.4 | 0.2063 | 3.6 |
| 4/16/2018 17:27 | 0.5  | 12.3 | 6.6 | 31.5 | 3.9 | 1.5 | 0.1948 | 3.7 |
| 4/16/2018 17:28 | 0.2  | 13.3 | 9   | 32.6 | 4   | 1.5 | 0.2082 | 3.6 |
| 4/16/2018 17:29 |      |      | 9   | 32.1 | 4   | 1.5 | 0.204  | 3.7 |
| 4/16/2018 17:30 |      |      | 8.2 | 31.8 | 3.9 | 1.5 | 0.1962 | 3.9 |
| 4/16/2018 17:31 |      |      | 6.6 | 31.3 | 4   | 1.5 | 0.2085 | 4   |
| 4/16/2018 17:32 |      |      | 6   | 30.7 | 4   | 1.6 | 0.1949 | 4   |
| 4/16/2018 17:33 |      |      | 7.8 | 30.4 | 3.9 | 1.6 | 0.2097 | 4.1 |
| 4/16/2018 17:34 |      |      | 7.6 | 30   | 4   | 1.6 | 0.1939 | 4.2 |
| 4/16/2018 17:35 |      |      | 6.6 | 29.6 | 4   | 1.6 | 0.202  | 4.2 |
| 4/16/2018 17:36 |      |      | 7.8 | 29.6 | 4   | 1.6 | 0.199  | 4.2 |
| 4/16/2018 17:37 |      |      | 7.8 | 29.1 | 4   | 1.7 | 0.1958 | 4.2 |
| 4/16/2018 17:38 |      |      | 7   | 29.2 | 3.9 | 1.7 | 0.2069 | 4.2 |
| 4/16/2018 17:39 |      |      | 6.6 | 28.8 | 4   | 1.8 | 0.1985 | 4.2 |
| 4/16/2018 17:40 |      |      | 6.4 | 28.4 | 4   | 1.8 | 0.2095 | 4.3 |
| 4/16/2018 17:41 |      |      | 6.1 | 28.2 | 4   | 1.8 | 0.1907 | 4.3 |
| 4/16/2018 17:42 |      |      | 5.8 | 27.7 | 4   | 1.8 | 0.2012 | 4.2 |
| 4/16/2018 17:43 |      |      | 7.1 | 27.6 | 4   | 1.9 | 0.1981 | 4.3 |
| 4/16/2018 17:44 |      |      | 6.4 | 27.3 | 4   | 1.9 | 0.2012 | 4.3 |
| 4/16/2018 17:45 |      |      | 6   | 27   | 4.1 | 1.9 | 0.2001 | 4.3 |
| 4/16/2018 17:46 |      |      | 5.4 | 27.1 | 4.1 | 1.9 | 0.1866 | 4.3 |
| 4/16/2018 17:47 |      |      | 6.5 | 26.9 | 4.1 | 2   | 0.2013 | 4.1 |
| 4/16/2018 17:48 |      |      | 4.8 | 26.7 | 4.1 | 2   | 0.1912 | 3.6 |
| 4/16/2018 17:49 |      |      | 5.4 | 26.5 | 4.2 | 2   | 0.2035 | 3.8 |
| 4/16/2018 17:50 |      |      | 5.5 | 26.1 | 4.3 | 2   | 0.2055 | 3.6 |
| 4/16/2018 17:51 |      |      | 4.6 | 25.8 | 4.3 | 2   | 0.1961 | 3.7 |
| 4/16/2018 17:52 |      |      | 6.3 | 25.9 | 4.3 | 2   | 0.2101 | 4   |
| 4/16/2018 17:53 |      |      | 6.9 | 25.1 | 4.3 | 2.1 | 0.1955 | 4.1 |
| 4/16/2018 17:54 |      |      | 5.8 | 25.2 | 4.4 | 2.1 | 0.2106 | 4.4 |
| 4/16/2018 17:55 |      |      | 5.5 | 25.6 | 4.4 | 2.1 | 0.1952 | 4.5 |
| 4/16/2018 17:56 |      |      | 5.1 | 24.9 | 4.2 | 2.1 | 0.2086 | 4.5 |
| 4/16/2018 17:57 |      |      | 4   | 24   | 4   | 2.2 | 0.203  | 4.4 |
| 4/16/2018 17:58 |      |      | 4.8 | 24.1 | 4.1 | 2.2 | 0.1962 | 4.3 |

|                 |     |      |     |     |        |     |
|-----------------|-----|------|-----|-----|--------|-----|
| 4/16/2018 17:59 | 4.5 | 24.4 | 4.3 | 2.2 | 0.2148 | 4.4 |
| 4/16/2018 18:00 | 4   | 24.7 | 4.3 | 2.2 | 0.1983 | 4.4 |
| 4/16/2018 18:01 | 5.3 | 24.6 | 4.3 | 2.2 | 0.2045 | 4.4 |
| 4/16/2018 18:02 |     | 24.1 | 4.2 | 2.2 | 0.1921 | 4.4 |
| 4/16/2018 18:03 | 5.3 | 24.4 | 4   | 2.2 | 0.202  | 4.4 |
| 4/16/2018 18:04 | 5   | 24.6 | 4   | 2.3 | 0.2    | 4.3 |
| 4/16/2018 18:05 | 4.8 | 24.4 | 4   | 2.2 | 0.1995 | 4.3 |
| 4/16/2018 18:06 | 4.6 | 24.6 | 4   | 2.2 | 0.2084 | 4.3 |
| 4/16/2018 18:07 | 4.9 | 24.4 | 4   | 2.2 | 0.1917 | 4.5 |
| 4/16/2018 18:08 | 3   | 24.3 | 3.9 | 2.3 | 0.203  | 4.5 |
| 4/16/2018 18:09 | 6.1 | 24.6 | 3.9 | 2.3 | 0.1945 | 4.5 |
| 4/16/2018 18:10 | 5.2 | 24.3 | 3.9 | 2.3 | 0.2051 | 4.3 |
| 4/16/2018 18:11 | 5.5 | 24.3 | 4   | 2.3 | 0.1968 | 3.5 |
| 4/16/2018 18:12 |     | 24.6 | 4   | 2.2 | 0.1977 | 3.2 |
| 4/16/2018 18:13 |     | 24.5 | 4.1 | 2.2 | 0.206  | 3.5 |
| 4/16/2018 18:14 |     | 24.7 | 4   | 2.2 | 0.1923 | 3.5 |
| 4/16/2018 18:15 |     | 24.4 | 4.1 | 2.2 | 0.2091 | 3.5 |
| 4/16/2018 18:16 |     | 24.8 | 4.1 | 2.2 | 0.1914 | 3.5 |
| 4/16/2018 18:17 | 5.1 | 25.3 | 4.2 | 2.2 | 0.2013 | 3.5 |
| 4/16/2018 18:18 | 4.9 | 25.4 | 4.2 | 2.2 | 0.1946 | 3.6 |
| 4/16/2018 18:19 | 5.3 | 25   | 4.3 | 2.1 | 0.1944 | 3.6 |
| 4/16/2018 18:20 | 3.1 | 24.2 | 4   | 2.2 | 0.2033 | 3.6 |
| 4/16/2018 18:21 | 3.6 | 23.8 | 4   | 2.2 | 0.1945 | 3.6 |
| 4/16/2018 18:22 | 4.6 | 23.6 | 4   | 2.2 | 0.2137 | 3.8 |
| 4/16/2018 18:23 | 3.1 | 23.5 | 4   | 2.2 | 0.1907 | 3.9 |
| 4/16/2018 18:24 | 3.7 | 23.5 | 4   | 2.3 | 0.2101 | 4   |
| 4/16/2018 18:25 | 4.6 | 23.5 | 4   | 2.3 | 0.1944 | 4   |
| 4/16/2018 18:26 | 5.2 | 23.5 | 4   | 2.3 | 0.2011 | 3.9 |
| 4/16/2018 18:27 | 3.9 | 23.8 | 4   | 2.3 | 0.1966 | 3.9 |
| 4/16/2018 18:28 | 4.2 | 23.6 | 4   | 2.3 | 0.2031 | 4   |
| 4/16/2018 18:29 | 2.8 | 23.5 | 4   | 2.3 | 0.2011 | 3.9 |
| 4/16/2018 18:30 | 4.6 | 23.5 | 4   | 2.3 | 0.1982 | 3.9 |
| 4/16/2018 18:31 | 3.7 | 23.7 | 4   | 2.3 | 0.2055 | 4.1 |
| 4/16/2018 18:32 | 3.1 | 23.4 | 3.9 | 2.3 | 0.1956 | 4.2 |
| 4/16/2018 18:33 | 3.8 | 23.9 | 4   | 2.3 | 0.2113 | 4   |
| 4/16/2018 18:34 | 4.8 | 24   | 4   | 2.3 | 0.1848 | 4.3 |
| 4/16/2018 18:35 | 3.4 | 24.9 | 4.1 | 2.2 | 0.2024 | 4.3 |
| 4/16/2018 18:36 | 5.1 | 24   | 4   | 2.3 | 0.1913 | 4.4 |
| 4/16/2018 18:37 | 4   | 23.1 | 3.9 | 2.3 | 0.2025 | 4.5 |
| 4/16/2018 18:38 | 3.7 | 23.2 | 3.9 | 2.3 | 0.207  | 4.6 |
| 4/16/2018 18:39 | 3.6 | 23.3 | 4   | 2.3 | 0.192  | 4.6 |
| 4/16/2018 18:40 | 5.9 | 23.3 | 4   | 2.3 | 0.204  | 4.6 |
| 4/16/2018 18:41 | 4.1 | 23.4 | 3.9 | 2.3 | 0.1924 | 4.6 |
| 4/16/2018 18:42 | 2.5 | 23.1 | 3.9 | 2.4 | 0.2093 | 4.5 |
| 4/16/2018 18:43 | 3.4 | 22.8 | 3.9 | 2.4 | 0.1923 | 4.2 |
| 4/16/2018 18:44 | 3.5 | 22.9 | 3.9 | 2.4 | 0.2054 | 4.2 |
| 4/16/2018 18:45 | 3.8 | 23.4 | 3.9 | 2.4 | 0.1952 | 4.1 |



|                 |     |      |     |     |        |     |
|-----------------|-----|------|-----|-----|--------|-----|
| 4/16/2018 18:46 | 3.9 | 23.8 | 3.9 | 2.4 | 0.1981 | 3.1 |
| 4/16/2018 18:47 | 4.6 | 23.5 | 3.9 | 2.4 | 0.206  | 3.6 |
| 4/16/2018 18:48 | 3.1 | 23.7 | 4   | 2.4 | 0.1937 | 3.9 |
| 4/16/2018 18:49 | 3.7 | 23.6 | 3.9 | 2.4 | 0.1998 | 4   |
| 4/16/2018 18:50 | 3.5 | 23.6 | 3.9 | 2.4 | 0.1898 | 4   |
| 4/16/2018 18:51 | 4.4 | 23.5 | 3.9 | 2.4 | 0.2056 | 4   |
| 4/16/2018 18:52 | 2.9 | 23   | 3.9 | 2.4 | 0.1909 | 4.1 |
| 4/16/2018 18:53 | 3.9 | 22.9 | 3.9 | 2.4 | 0.2012 | 4.3 |
| 4/16/2018 18:54 | 3.3 | 22.9 | 3.9 | 2.4 | 0.202  | 4.3 |
| 4/16/2018 18:55 | 4.4 | 22.9 | 3.9 | 2.4 | 0.1903 | 4.3 |
| 4/16/2018 18:56 | 4   | 23   | 3.8 | 2.4 | 0.2001 | 4.4 |
| 4/16/2018 18:57 | 4.6 | 23   | 3.8 | 2.4 | 0.1884 | 4.4 |
| 4/16/2018 18:58 | 4.5 | 23   | 3.8 | 2.4 | 0.1942 | 4.4 |
| 4/16/2018 18:59 | 4.3 | 23.4 | 3.8 | 2.4 | 0.1877 | 4.3 |
| 4/16/2018 19:00 | 4.1 | 23.4 | 3.8 | 2.4 | 0.2007 | 4.3 |
| 4/16/2018 19:01 | 5.2 | 22.9 | 3.8 | 2.4 | 0.198  | 4.5 |
| 4/16/2018 19:02 | 4   | 23.1 | 3.8 | 2.4 | 0.1882 | 4.4 |
| 4/16/2018 19:03 | 3   | 23.3 | 3.8 | 2.4 | 0.1988 | 4.4 |
| 4/16/2018 19:04 | 3.8 | 22.7 | 3.8 | 2.4 | 0.1853 | 4.4 |
| 4/16/2018 19:05 | 3.7 | 22.9 | 3.8 | 2.4 | 0.1931 | 4.3 |
| 4/16/2018 19:06 | 5.3 | 23   | 3.8 | 2.4 | 0.1801 | 4.3 |
| 4/16/2018 19:07 | 4.1 | 22.7 | 3.8 | 2.4 | 0.1891 | 4.4 |
| 4/16/2018 19:08 | 3.8 | 22.7 | 3.8 | 2.4 | 0.1904 | 4.4 |
| 4/16/2018 19:09 | 4   | 22.7 | 3.8 | 2.4 | 0.1808 | 4.4 |
| 4/16/2018 19:10 | 5   | 22.7 | 3.8 | 2.4 | 0.1929 | 4.6 |
| 4/16/2018 19:11 | 3.5 | 22.7 | 3.8 | 2.4 | 0.1725 | 4.6 |
| 4/16/2018 19:12 | 3.4 | 23.3 | 3.8 | 2.4 | 0.181  | 4.5 |
| 4/16/2018 19:13 | 4   | 23.2 | 3.8 | 2.4 | 0.1789 | 3.2 |
| 4/16/2018 19:14 | 4   | 23.1 | 3.8 | 2.4 | 0.1797 | 3.6 |
| 4/16/2018 19:15 | 3.8 | 23.6 | 3.8 | 2.4 | 0.1796 | 4   |
| 4/16/2018 19:16 | 4   | 23.4 | 3.8 | 2.4 | 0.1814 | 4.2 |
| 4/16/2018 19:17 | 3.5 | 23.3 | 3.8 | 2.4 | 0.1845 | 4.3 |
| 4/16/2018 19:18 | 5   | 23.3 | 3.8 | 2.4 | 0.1848 | 4.5 |
| 4/16/2018 19:19 | 5.4 | 23.8 | 3.8 | 2.4 | 0.1811 | 4.5 |
| 4/16/2018 19:20 | 4.6 | 24.1 | 3.8 | 2.3 | 0.188  | 4.3 |
| 4/16/2018 19:21 | 4.4 | 23.9 | 3.9 | 2.3 | 0.18   | 3.8 |
| 4/16/2018 19:22 | 4   | 24.8 | 3.9 | 2.3 | 0.1881 | 3.9 |
| 4/16/2018 19:23 | 3.7 | 25.3 | 3.9 | 2.2 | 0.1783 | 4   |
| 4/16/2018 19:24 | 6.4 | 25.5 | 3.9 | 2.2 | 0.1854 | 3.9 |
| 4/16/2018 19:25 | 3.7 | 25   | 3.9 | 2.1 | 0.1744 | 3.9 |
| 4/16/2018 19:26 | 3.9 | 23.2 | 3.8 | 2.1 | 0.178  | 4   |
| 4/16/2018 19:27 | 3.4 | 22.9 | 3.8 | 2.1 | 0.1919 | 4.1 |
| 4/16/2018 19:28 | 4.7 | 22.4 | 3.8 | 2.2 | 0.1738 | 4.3 |
| 4/16/2018 19:29 | 5.1 | 22.4 | 3.8 | 2.2 | 0.1938 | 4.3 |
| 4/16/2018 19:30 | 4.1 | 22.4 | 3.7 | 2.2 | 0.188  | 4.3 |
| 4/16/2018 19:31 | 3.7 | 22.5 | 3.7 | 2.3 | 0.1931 | 4.3 |
| 4/16/2018 19:32 | 3.6 | 22.6 | 3.7 | 2.3 | 0.1827 | 4.3 |

|                 |     |      |     |     |        |     |
|-----------------|-----|------|-----|-----|--------|-----|
| 4/16/2018 19:33 | 1.7 | 22.4 | 3.7 | 2.4 | 0.1765 | 4.5 |
| 4/16/2018 19:34 | 3   | 22.4 | 3.7 | 2.4 | 0.1907 | 4.6 |
| 4/16/2018 19:35 | 4.7 | 22.4 | 3.7 | 2.4 | 0.18   | 4.6 |
| 4/16/2018 19:36 | 3.1 | 22.5 | 3.7 | 2.4 | 0.1815 | 4.7 |
| 4/16/2018 19:37 | 3.8 | 22.5 | 3.7 | 2.4 | 0.1944 | 4.6 |
| 4/16/2018 19:38 | 3.5 | 22.4 | 3.7 | 2.4 | 0.1789 | 4.4 |
| 4/16/2018 19:39 | 3.9 | 22.2 | 3.7 | 2.4 | 0.1907 | 4.6 |
| 4/16/2018 19:40 | 3   | 22.2 | 3.6 | 2.4 | 0.1818 | 4.5 |
| 4/16/2018 19:41 | 2.5 | 22.3 | 3.6 | 2.4 | 0.1946 | 4.4 |
| 4/16/2018 19:42 | 5.2 | 22.6 | 3.6 | 2.4 | 0.1868 | 4.4 |
| 4/16/2018 19:43 | 3.9 | 22.7 | 3.6 | 2.4 | 0.1819 | 3.9 |
| 4/16/2018 19:44 | 4.4 | 23.2 | 3.6 | 2.4 | 0.1884 | 3.4 |
| 4/16/2018 19:45 | 4.4 | 23.1 | 3.6 | 2.4 | 0.1703 | 3.7 |
| 4/16/2018 19:46 | 4.3 | 23.3 | 3.6 | 2.4 | 0.1875 | 3.9 |
| 4/16/2018 19:47 | 3.8 | 23.3 | 3.6 | 2.4 | 0.1806 | 4   |
| 4/16/2018 19:48 | 3.4 | 22.8 | 3.6 | 2.4 | 0.1756 | 4   |
| 4/16/2018 19:49 | 3   | 23.4 | 3.6 | 2.3 | 0.1979 | 3.9 |
| 4/16/2018 19:50 | 4.1 | 23   | 3.6 | 2.3 | 0.174  | 4   |
| 4/16/2018 19:51 | 2.4 | 22.3 | 3.6 | 2.3 | 0.1893 | 4.2 |
| 4/16/2018 19:52 | 4.2 | 22.3 | 3.6 | 2.3 | 0.1824 | 4.2 |
| 4/16/2018 19:53 | 3.5 | 22.4 | 3.6 | 2.3 | 0.1818 | 4.3 |
| 4/16/2018 19:54 | 3.4 | 22.5 | 3.6 | 2.3 | 0.1878 | 4.3 |
| 4/16/2018 19:55 | 3.8 | 22.4 | 3.6 | 2.4 | 0.1746 | 4.4 |
| 4/16/2018 19:56 | 3.1 | 22.4 | 3.6 | 2.4 | 0.1896 | 4.5 |
| 4/16/2018 19:57 | 4.2 | 22.9 | 3.6 | 2.4 | 0.1836 | 4.6 |
| 4/16/2018 19:58 | 3.6 | 23.2 | 3.6 | 2.4 | 0.1803 | 4.6 |
| 4/16/2018 19:59 | 2.6 | 22.4 | 3.5 | 2.4 | 0.1948 | 4.5 |
| 4/16/2018 20:00 | 3.8 | 22.4 | 3.6 | 2.4 | 0.1899 | 4.5 |
| 4/16/2018 20:01 | 3.2 | 22.3 | 3.6 | 2.4 | 0.1981 | 4.6 |
| 4/16/2018 20:02 | 3.8 | 22.4 | 3.5 | 2.3 | 0.1756 | 4.8 |
| 4/16/2018 20:03 | 5.3 | 22.3 | 3.6 | 2.3 | 0.1889 | 4.8 |
| 4/16/2018 20:04 | 4   | 22.7 | 3.5 | 2.3 | 0.1866 | 5   |
| 4/16/2018 20:05 | 4.6 | 22.7 | 3.6 | 2.3 | 0.1798 | 4.9 |
| 4/16/2018 20:06 | 2.8 | 22.7 | 3.6 | 2.3 | 0.1953 | 4.9 |
| 4/16/2018 20:07 | 3.4 | 22.8 | 3.6 | 2.3 | 0.1762 | 4.8 |
| 4/16/2018 20:08 | 4.3 | 22.8 | 3.5 | 2.4 | 0.1948 | 4.9 |
| 4/16/2018 20:09 | 3.2 | 23   | 3.5 | 2.4 | 0.1789 | 4.9 |
| 4/16/2018 20:10 | 3.9 | 22.8 | 3.6 | 2.4 | 0.1862 | 4.9 |
| 4/16/2018 20:11 | 4.5 | 22.9 | 3.5 | 2.4 | 0.1953 | 5   |
| 4/16/2018 20:12 | 2.9 | 22.9 | 3.5 | 2.4 | 0.1772 | 4.9 |
| 4/16/2018 20:13 | 3.9 | 22.5 | 3.5 | 2.3 | 0.1914 | 4.7 |
| 4/16/2018 20:14 | 2.8 | 22.6 | 3.5 | 2.3 | 0.181  | 4.8 |
| 4/16/2018 20:15 | 3.1 | 22.8 | 3.5 | 2.3 | 0.1946 | 4.8 |
| 4/16/2018 20:16 | 3.3 | 22.6 | 3.5 | 2.3 | 0.1974 | 5   |
| 4/16/2018 20:17 | 3.7 | 23.1 | 3.6 | 2.3 | 0.1815 | 5   |
| 4/16/2018 20:18 | 3.9 | 22.5 | 3.5 | 2.3 | 0.1901 | 4.9 |
| 4/16/2018 20:19 | 2.9 | 22.7 | 3.5 | 2.3 | 0.1818 | 4.7 |

|                 |     |      |     |     |        |     |
|-----------------|-----|------|-----|-----|--------|-----|
| 4/16/2018 20:20 | 3.2 | 22.4 | 3.5 | 2.3 | 0.1881 | 3.9 |
| 4/16/2018 20:21 | 3.4 | 22.1 | 3.5 | 2.3 | 0.1833 | 3.2 |
| 4/16/2018 20:22 | 4.1 | 22.3 | 3.5 | 2.3 | 0.1879 | 3.6 |
| 4/16/2018 20:23 | 3   | 22.2 | 3.5 | 2.3 | 0.196  | 3.8 |
| 4/16/2018 20:24 | 2.7 | 22.1 | 3.5 | 2.4 | 0.1827 | 3.9 |
| 4/16/2018 20:25 | 2   | 22.2 | 3.5 | 2.4 | 0.1939 | 3.9 |
| 4/16/2018 20:26 | 3.3 | 21.9 | 3.5 | 2.4 | 0.186  | 4.1 |
| 4/16/2018 20:27 | 5   | 22.3 | 3.5 | 2.4 | 0.1933 | 4.3 |
| 4/16/2018 20:28 | 3.9 | 22.1 | 3.5 | 2.4 | 0.196  | 4.3 |
| 4/16/2018 20:29 | 3.2 | 22.1 | 3.5 | 2.4 | 0.1859 | 4.4 |
| 4/16/2018 20:30 | 4.4 | 22.1 | 3.5 | 2.4 | 0.1969 | 4.5 |
| 4/16/2018 20:31 | 3.2 | 21.7 | 3.5 | 2.4 | 0.1799 | 4.5 |
| 4/16/2018 20:32 | 3.7 | 22   | 3.5 | 2.4 | 0.1916 | 4.5 |
| 4/16/2018 20:33 | 3.8 | 21.9 | 3.5 | 2.4 | 0.1839 | 4.4 |
| 4/16/2018 20:34 | 4.3 | 21.9 | 3.5 | 2.4 | 0.1869 | 4.4 |
| 4/16/2018 20:35 | 3.2 | 21.6 | 3.5 | 2.4 | 0.1939 | 4.4 |
| 4/16/2018 20:36 | 3.6 | 21.8 | 3.5 | 2.4 | 0.1847 | 4.5 |
| 4/16/2018 20:37 | 4   | 21.7 | 3.5 | 2.4 | 0.1874 | 4.5 |
| 4/16/2018 20:38 | 5.7 | 21.8 | 3.5 | 2.4 | 0.1767 | 4.6 |
| 4/16/2018 20:39 | 2.8 | 22.2 | 3.5 | 2.4 | 0.1866 | 4.6 |
| 4/16/2018 20:40 | 3.4 | 22.2 | 3.5 | 2.4 | 0.1902 | 4.7 |
| 4/16/2018 20:41 | 4.3 | 22.5 | 3.5 | 2.4 | 0.1816 | 4.8 |
| 4/16/2018 20:42 | 4.3 | 22.7 | 3.5 | 2.4 | 0.1888 | 4.8 |
| 4/16/2018 20:43 | 4.4 | 22.7 | 3.5 | 2.4 | 0.1881 | 4.8 |
| 4/16/2018 20:44 | 3.1 | 22.5 | 3.5 | 2.4 | 0.1908 | 4.7 |
| 4/16/2018 20:45 | 3.9 | 22.1 | 3.5 | 2.4 | 0.1872 | 4.6 |
| 4/16/2018 20:46 | 3.8 | 21.9 | 3.5 | 2.3 | 0.184  | 4.6 |
| 4/16/2018 20:47 | 3.8 | 21.7 | 3.5 | 2.4 | 0.1903 | 4.6 |
| 4/16/2018 20:48 | 3.8 | 21.9 | 3.4 | 2.4 | 0.1776 | 4.4 |
| 4/16/2018 20:49 | 4.3 | 22.1 | 3.4 | 2.4 | 0.1893 | 4.4 |
| 4/16/2018 20:50 | 3.5 | 21.8 | 3.4 | 2.4 | 0.1908 | 4.5 |
| 4/16/2018 20:51 | 4.5 | 22.3 | 3.4 | 2.4 | 0.1821 | 4.5 |
| 4/16/2018 20:52 | 2.8 | 21.8 | 3.5 | 2.4 | 0.188  | 4.5 |
| 4/16/2018 20:53 | 4.7 | 21.8 | 3.4 | 2.4 | 0.1781 | 4.5 |
| 4/16/2018 20:54 | 2.7 | 21.6 | 3.4 | 2.4 | 0.1937 | 4.4 |
| 4/16/2018 20:55 | 4   | 21.6 | 3.4 | 2.4 | 0.1854 | 4.5 |
| 4/16/2018 20:56 | 3.9 | 21.5 | 3.4 | 2.4 | 0.1866 | 4.4 |
| 4/16/2018 20:57 | 3   | 21.9 | 3.4 | 2.4 | 0.1947 | 4.5 |
| 4/16/2018 20:58 | 4.2 | 21.7 | 3.4 | 2.4 | 0.1816 | 4.5 |
| 4/16/2018 20:59 | 2.6 | 21.6 | 3.4 | 2.4 | 0.1946 | 4.5 |
| 4/16/2018 21:00 | 3.4 | 21.6 | 3.4 | 2.4 | 0.186  | 4.4 |
| 4/16/2018 21:01 | 3.1 | 21.7 | 3.4 | 2.4 | 0.1953 | 4.1 |
| 4/16/2018 21:02 | 4.1 | 21.6 | 3.4 | 2.5 | 0.1893 | 2.7 |
| 4/16/2018 21:03 | 2.6 | 21.8 | 3.5 | 2.5 | 0.1821 | 2.7 |
| 4/16/2018 21:04 | 3.6 | 21.9 | 3.5 | 2.4 | 0.1949 | 3   |
| 4/16/2018 21:05 | 3.1 | 21.7 | 3.5 | 2.4 | 0.1812 | 3.3 |
| 4/16/2018 21:06 | 2.9 | 22   | 3.5 | 2.4 | 0.1904 | 3.3 |

|                 |     |      |     |     |        |     |
|-----------------|-----|------|-----|-----|--------|-----|
| 4/16/2018 21:07 | 3.9 | 22   | 3.5 | 2.4 | 0.1867 | 3.4 |
| 4/16/2018 21:08 | 3.9 | 22   | 3.5 | 2.4 | 0.1817 | 3.5 |
| 4/16/2018 21:09 | 2.9 | 22   | 3.6 | 2.4 | 0.198  | 3.5 |
| 4/16/2018 21:10 | 2.9 | 21.9 | 3.5 | 2.4 | 0.178  | 3.6 |
| 4/16/2018 21:11 | 3.3 | 22.2 | 3.6 | 2.3 | 0.19   | 3.5 |
| 4/16/2018 21:12 | 3.5 | 22.1 | 3.6 | 2.3 | 0.1862 | 3.8 |
| 4/16/2018 21:13 | 4.4 | 21.9 | 3.6 | 2.3 | 0.1842 | 4   |
| 4/16/2018 21:14 | 3.8 | 22.1 | 3.6 | 2.3 | 0.1906 | 4   |
| 4/16/2018 21:15 | 4.9 | 22   | 3.6 | 2.3 | 0.1813 | 4.1 |
| 4/16/2018 21:16 | 3.2 | 21.8 | 3.7 | 2.3 | 0.1994 | 4.2 |
| 4/16/2018 21:17 | 3.9 | 22.1 | 3.6 | 2.3 | 0.1847 | 4.3 |
| 4/16/2018 21:18 | 3.9 | 21.6 | 3.6 | 2.3 | 0.1861 | 4.2 |
| 4/16/2018 21:19 | 3   | 21.5 | 3.6 | 2.3 | 0.1905 | 4.1 |
| 4/16/2018 21:20 | 3.6 | 21.6 | 3.6 | 2.3 | 0.1832 | 4.1 |
| 4/16/2018 21:21 | 3.5 | 21.4 | 3.6 | 2.3 | 0.1948 | 4.1 |
| 4/16/2018 21:22 | 3.8 | 21.5 | 3.6 | 2.4 | 0.1816 | 4.2 |
| 4/16/2018 21:23 | 3.9 | 21.5 | 3.6 | 2.4 | 0.1906 | 4.3 |
| 4/16/2018 21:24 |     | 21.6 | 3.6 | 2.4 | 0.1928 | 4.3 |
| 4/16/2018 21:25 | 3.1 | 21.2 | 3.6 | 2.4 | 0.1829 | 4.2 |
| 4/16/2018 21:26 | 2.2 | 21.2 | 3.6 | 2.4 | 0.1931 | 4.2 |
| 4/16/2018 21:27 |     | 21.5 | 3.6 | 2.4 | 0.1816 | 4.2 |
| 4/16/2018 21:28 |     | 21.6 | 3.7 | 2.4 | 0.1955 | 4.2 |
| 4/16/2018 21:29 |     | 21.8 | 3.7 | 2.4 | 0.1866 | 4.1 |
| 4/16/2018 21:30 | 9.7 | 21.6 | 3.7 | 2.4 | 0.1844 | 4.1 |
| 4/16/2018 21:31 |     | 21.7 | 3.7 | 2.4 | 0.1933 | 4   |
| 4/16/2018 21:32 | 4.8 | 21.7 | 3.8 | 2.4 | 0.18   | 3.9 |
| 4/16/2018 21:33 | 2.9 | 21.5 | 3.8 | 2.4 | 0.1879 | 3.8 |
| 4/16/2018 21:34 | 6.4 | 21.6 | 3.8 | 2.4 | 0.193  | 3.8 |
| 4/16/2018 21:35 | 3.3 | 21.4 | 3.8 | 2.4 | 0.1821 | 4   |
| 4/16/2018 21:36 | 3.7 | 22   | 3.8 | 2.4 | 0.196  | 4.3 |
| 4/16/2018 21:37 | 5.2 | 21.6 | 3.9 | 2.4 | 0.1722 | 4.3 |
| 4/16/2018 21:38 | 2.4 | 21.6 | 3.9 | 2.4 | 0.1942 | 4.2 |
| 4/16/2018 21:39 | 4.4 | 21.1 | 3.8 | 2.4 | 0.1871 | 4.2 |
| 4/16/2018 21:40 | 3.1 | 21.3 | 3.8 | 2.4 | 0.1899 | 4.3 |
| 4/16/2018 21:41 | 3.3 | 21.1 | 3.7 | 2.4 | 0.1926 | 4.4 |
| 4/16/2018 21:42 | 3.4 | 21   | 3.8 | 2.4 | 0.1825 | 4.4 |
| 4/16/2018 21:43 | 2.2 | 21.5 | 3.9 | 2.4 | 0.1978 | 4.4 |
| 4/16/2018 21:44 | 3.9 | 21.2 | 3.9 | 2.4 | 0.1783 | 4.3 |
| 4/16/2018 21:45 | 3.7 | 21.2 | 4   | 2.5 | 0.2009 | 4.2 |
| 4/16/2018 21:46 | 3.2 | 20.8 | 3.9 | 2.5 | 0.1857 | 4.3 |
| 4/16/2018 21:47 | 4   | 20.9 | 4   | 2.5 | 0.1907 | 3.7 |
| 4/16/2018 21:48 | 2.3 | 20.7 | 3.9 | 2.5 | 0.1931 | 1.8 |
| 4/16/2018 21:49 | 3.9 | 20.9 | 4   | 2.5 | 0.1831 | 1.6 |
| 4/16/2018 21:50 | 3.3 | 20.8 | 4.1 | 2.5 | 0.1944 | 1.9 |
| 4/16/2018 21:51 | 2.5 | 20.7 | 4   | 2.5 | 0.1845 | 2.1 |
| 4/16/2018 21:52 | 2.9 | 20.9 | 4.1 | 2.5 | 0.1881 | 2.3 |
| 4/16/2018 21:53 | 2.2 | 20.9 | 4.2 | 2.5 | 0.1884 | 2.4 |

|                 |     |      |     |     |        |     |
|-----------------|-----|------|-----|-----|--------|-----|
| 4/16/2018 21:54 | 4.2 | 21   | 4.3 | 2.5 | 0.177  | 2.6 |
| 4/16/2018 21:55 | 2.8 | 20.7 | 4.2 | 2.5 | 0.1954 | 2.7 |
| 4/16/2018 21:56 | 2.6 | 20.5 | 4.3 | 2.5 | 0.1822 | 2.8 |
| 4/16/2018 21:57 | 2.9 | 20.9 | 4.3 | 2.5 | 0.1922 | 2.9 |
| 4/16/2018 21:58 | 2.6 | 20.7 | 4.2 | 2.5 | 0.1844 | 3   |
| 4/16/2018 21:59 | 2.7 | 20.7 | 4.4 | 2.5 | 0.1913 | 3.1 |
| 4/16/2018 22:00 | 3.2 | 20.7 | 4.3 | 2.5 | 0.1999 | 3.2 |
| 4/16/2018 22:01 | 2.6 | 20.7 | 4.3 | 2.5 | 0.1824 | 3.3 |
| 4/16/2018 22:02 | 2   | 20.8 | 4.3 | 2.5 | 0.1936 | 3.4 |
| 4/16/2018 22:03 | 2.5 | 20.3 | 4.4 | 2.5 | 0.1797 | 3.5 |
| 4/16/2018 22:04 | 2.9 | 20.7 | 4.4 | 2.5 | 0.1916 | 3.6 |
| 4/16/2018 22:05 | 2.2 | 20.5 | 4.4 | 2.5 | 0.1952 | 3.6 |
| 4/16/2018 22:06 | 3   | 20.7 | 4.4 | 2.5 | 0.1799 | 3.6 |
| 4/16/2018 22:07 | 3.2 | 20.5 | 4.4 | 2.5 | 0.1936 | 3.6 |
| 4/16/2018 22:08 | 3.1 | 20.5 | 4.4 | 2.5 | 0.1779 | 3.6 |
| 4/16/2018 22:09 | 2   | 20.4 | 4.4 | 2.5 | 0.1918 | 3.7 |
| 4/16/2018 22:10 | 2.6 | 20.6 | 4.4 | 2.5 | 0.1913 | 3.7 |
| 4/16/2018 22:11 | 3   | 20.7 | 4.5 | 2.5 | 0.1872 | 3.8 |
| 4/16/2018 22:12 | 2.3 | 20.5 | 4.5 | 2.5 | 0.1934 | 3.8 |
| 4/16/2018 22:13 | 2.7 | 20.6 | 4.4 | 2.5 | 0.179  | 3.9 |
| 4/16/2018 22:14 | 2.7 | 20.6 | 4.5 | 2.5 | 0.1968 | 4   |
| 4/16/2018 22:15 | 2.1 | 20.6 | 4.5 | 2.5 | 0.1848 | 4   |
| 4/16/2018 22:16 | 3.3 | 20.2 | 4.5 | 2.5 | 0.1876 | 4   |
| 4/16/2018 22:17 | 2.2 | 20.6 | 4.5 | 2.5 | 0.1879 | 4.1 |
| 4/16/2018 22:18 | 3.1 | 20.4 | 4.5 | 2.5 | 0.1844 | 4.1 |
| 4/16/2018 22:19 | 2.4 | 20.5 | 4.5 | 2.5 | 0.1955 | 4.1 |
| 4/16/2018 22:20 | 3.3 | 20.6 | 4.4 | 2.5 | 0.1867 | 4.1 |
| 4/16/2018 22:21 | 2.7 | 20.6 | 4.5 | 2.5 | 0.1932 | 4.1 |
| 4/16/2018 22:22 | 3.5 | 20.6 | 4.5 | 2.5 | 0.1865 | 4.1 |
| 4/16/2018 22:23 | 3.5 | 20.6 | 4.5 | 2.5 | 0.1841 | 4.1 |
| 4/16/2018 22:24 | 3.1 | 20.8 | 4.6 | 2.5 | 0.1926 | 4.1 |
| 4/16/2018 22:25 | 3.4 | 21   | 4.6 | 2.5 | 0.1832 | 4.1 |
| 4/16/2018 22:26 | 3.4 | 20.8 | 4.6 | 2.5 | 0.1998 | 4.1 |
| 4/16/2018 22:27 | 3.8 | 20.8 | 4.6 | 2.4 | 0.1866 | 4.2 |
| 4/16/2018 22:28 | 2.5 | 20.7 | 4.6 | 2.5 | 0.1859 | 4.2 |
| 4/16/2018 22:29 | 2.8 | 20.5 | 4.6 | 2.5 | 0.1926 | 4.1 |
| 4/16/2018 22:30 | 3.6 | 20.7 | 4.7 | 2.5 | 0.1865 | 4   |
| 4/16/2018 22:31 | 2.8 | 20.4 | 4.8 | 2.5 | 0.1953 | 3.9 |
| 4/16/2018 22:32 | 1.9 | 20.5 | 4.7 | 2.5 | 0.1879 | 2.4 |
| 4/16/2018 22:33 | 2.8 | 20.4 | 4.8 | 2.5 | 0.1929 | 1.8 |
| 4/16/2018 22:34 | 2.6 | 20.5 | 4.7 | 2.5 | 0.1908 | 2   |
| 4/16/2018 22:35 | 2.6 | 20.5 | 4.7 | 2.5 | 0.1767 | 2.2 |
| 4/16/2018 22:36 | 3.7 | 20.5 | 4.8 | 2.5 | 0.192  | 2.4 |
| 4/16/2018 22:37 | 3.1 | 20.8 | 4.9 | 2.5 | 0.1882 | 2.6 |
| 4/16/2018 22:38 | 1.8 | 20.7 | 5   | 2.5 | 0.2022 | 2.8 |
| 4/16/2018 22:39 | 3.5 | 20.9 | 5.1 | 2.5 | 0.197  | 3   |
| 4/16/2018 22:40 | 2.2 | 20.9 | 5   | 2.5 | 0.1842 | 3.1 |

|                 |     |      |     |     |        |     |
|-----------------|-----|------|-----|-----|--------|-----|
| 4/16/2018 22:41 | 3.6 | 20.8 | 5   | 2.5 | 0.2019 | 3.2 |
| 4/16/2018 22:42 | 2.1 | 20.8 | 5   | 2.5 | 0.1881 | 3.2 |
| 4/16/2018 22:43 | 3.8 | 20.9 | 5   | 2.5 | 0.1822 | 3.3 |
| 4/16/2018 22:44 | 4   | 21   | 5.2 | 2.5 | 0.1932 | 3.3 |
| 4/16/2018 22:45 | 2.8 | 20.6 | 5.1 | 2.4 | 0.1886 | 3.4 |
| 4/16/2018 22:46 | 3.4 | 20.9 | 5.1 | 2.4 | 0.2012 | 3.4 |
| 4/16/2018 22:47 | 3.7 | 20.8 | 5.2 | 2.4 | 0.1804 | 3.5 |
| 4/16/2018 22:48 | 1.8 | 21   | 5.2 | 2.4 | 0.2005 | 3.5 |
| 4/16/2018 22:49 | 3.1 | 20.9 | 5.2 | 2.4 | 0.1891 | 3.6 |
| 4/16/2018 22:50 | 3.3 | 20.9 | 5.2 | 2.4 | 0.188  | 3.6 |
| 4/16/2018 22:51 | 3.1 | 21   | 5.2 | 2.4 | 0.1962 | 3.7 |
| 4/16/2018 22:52 | 4.9 | 20.8 | 5.2 | 2.4 | 0.1818 | 3.7 |
| 4/16/2018 22:53 | 2.4 | 20.8 | 5.1 | 2.4 | 0.199  | 3.8 |
| 4/16/2018 22:54 | 3.1 | 20.4 | 5.1 | 2.4 | 0.1873 | 3.8 |
| 4/16/2018 22:55 | 4.4 | 20.8 | 5.3 | 2.4 | 0.1828 | 3.8 |
| 4/16/2018 22:56 | 2.1 | 20.7 | 5.3 | 2.4 | 0.1979 | 3.8 |
| 4/16/2018 22:57 | 1.8 | 20.4 | 5.1 | 2.4 | 0.1823 | 4   |
| 4/16/2018 22:58 | 1.8 | 20.8 | 5.1 | 2.4 | 0.1975 | 4.2 |
| 4/16/2018 22:59 | 4.5 | 21   | 5.2 | 2.4 | 0.1861 | 4.4 |
| 4/16/2018 23:00 | 1.5 | 20.9 | 5.1 | 2.4 | 0.1962 | 4.4 |
| 4/16/2018 23:01 | 2.1 | 20.5 | 5.1 | 2.4 | 0.1917 | 4.5 |
| 4/16/2018 23:02 | 2.2 | 20.7 | 5.1 | 2.4 | 0.1828 | 4.5 |
| 4/16/2018 23:03 | 2.6 | 20.6 | 5.1 | 2.4 | 0.1987 | 4.5 |
| 4/16/2018 23:04 | 3.5 | 20.4 | 5   | 2.4 | 0.1854 | 4.5 |
| 4/16/2018 23:05 | 1.8 | 20.5 | 5.1 | 2.5 | 0.1945 | 4.5 |
| 4/16/2018 23:06 | 2.7 | 20.5 | 5.1 | 2.4 | 0.1862 | 4.6 |
| 4/16/2018 23:07 | 2   | 20.5 | 5   | 2.5 | 0.1891 | 4.6 |
| 4/16/2018 23:08 | 3.6 | 20.6 | 5   | 2.5 | 0.1918 | 4.7 |
| 4/16/2018 23:09 | 3.1 | 20.4 | 5.1 | 2.5 | 0.1824 | 4.7 |
| 4/16/2018 23:10 | 2.5 | 20.5 | 5.1 | 2.5 | 0.2003 | 4.8 |
| 4/16/2018 23:11 | 2.5 | 20.2 | 5   | 2.5 | 0.1869 | 4.8 |
| 4/16/2018 23:12 | 1.5 | 20.3 | 5.1 | 2.5 | 0.1931 | 4.7 |
| 4/16/2018 23:13 | 3.2 | 20.2 | 5.2 | 2.5 | 0.1992 | 4.7 |
| 4/16/2018 23:14 | 3.4 | 20.5 | 5.2 | 2.5 | 0.1823 | 4.7 |
| 4/16/2018 23:15 | 1.8 | 20.2 | 5.2 | 2.6 | 0.1997 | 4.6 |
| 4/16/2018 23:16 | 3.1 | 20.3 | 5.1 | 2.6 | 0.1885 | 4.7 |
| 4/16/2018 23:17 | 2.2 | 20.5 | 5.1 | 2.6 | 0.1935 | 4.7 |
| 4/16/2018 23:18 | 2.1 | 20.3 | 5.2 | 2.5 | 0.1918 | 4.7 |
| 4/16/2018 23:19 | 1.8 | 20.4 | 5.3 | 2.5 | 0.1837 | 4.7 |
| 4/16/2018 23:20 | 2.5 | 20.3 | 5.2 | 2.5 | 0.1971 | 4.7 |
| 4/16/2018 23:21 | 2.6 | 20.3 | 5.1 | 2.5 | 0.1851 | 4.7 |
| 4/16/2018 23:22 | 1.9 | 20.2 | 5.1 | 2.5 | 0.2006 | 4.6 |
| 4/16/2018 23:23 | 2.6 | 20.2 | 5.1 | 2.5 | 0.1936 | 4.7 |
| 4/16/2018 23:24 | 2.5 | 20.2 | 5.1 | 2.5 | 0.1871 | 4.5 |
| 4/16/2018 23:25 | 2.6 | 20.1 | 5.1 | 2.5 | 0.1962 | 4.6 |
| 4/16/2018 23:26 | 3.2 | 20.1 | 5.1 | 2.6 | 0.1858 | 4.6 |
| 4/16/2018 23:27 | 2.5 | 20.1 | 5.1 | 2.6 | 0.1905 | 4.6 |

|                 |     |      |     |     |        |     |
|-----------------|-----|------|-----|-----|--------|-----|
| 4/16/2018 23:28 | 0.7 | 20   | 5.2 | 2.6 | 0.1873 | 4.6 |
| 4/16/2018 23:29 | 2.3 | 19.9 | 5.2 | 2.6 | 0.1858 | 4.7 |
| 4/16/2018 23:30 | 0.4 | 20   | 5.1 | 2.6 | 0.1968 | 4.7 |
| 4/16/2018 23:31 | 3.1 | 20   | 5.2 | 2.6 | 0.1804 | 4.8 |
| 4/16/2018 23:32 | 2.3 | 19.9 | 5.3 | 2.6 | 0.1929 | 4.7 |
| 4/16/2018 23:33 | 2.3 | 19.9 | 5.2 | 2.6 | 0.1871 | 4.7 |
| 4/16/2018 23:34 | 2.9 | 20   | 5.3 | 2.6 | 0.1911 | 4.7 |
| 4/16/2018 23:35 | 2.8 | 20.2 | 5.3 | 2.6 | 0.1973 | 4.8 |
| 4/16/2018 23:36 | 2.8 | 19.9 | 5.3 | 2.6 | 0.1752 | 4.9 |
| 4/16/2018 23:37 | 2.3 | 19.9 | 5.3 | 2.6 | 0.1975 | 4.8 |
| 4/16/2018 23:38 | 2.9 | 19.9 | 5.5 | 2.6 | 0.1864 | 4.7 |
| 4/16/2018 23:39 | 3.6 | 19.9 | 5.4 | 2.6 | 0.1951 | 4.7 |
| 4/16/2018 23:40 | 2.7 | 19.9 | 5.5 | 2.6 | 0.1892 | 4.2 |
| 4/16/2018 23:41 | 3.3 | 20   | 5.4 | 2.6 | 0.1857 | 3.1 |
| 4/16/2018 23:42 | 2.2 | 19.9 | 5.5 | 2.6 | 0.1922 | 3.2 |
| 4/16/2018 23:43 | 3   | 19.8 | 5.5 | 2.5 | 0.1786 | 3.6 |
| 4/16/2018 23:44 | 1.4 | 20   | 5.5 | 2.5 | 0.1961 | 3.7 |
| 4/16/2018 23:45 | 3.1 | 20.1 | 5.5 | 2.6 | 0.1847 | 3.8 |
| 4/16/2018 23:46 | 3.6 | 19.9 | 5.5 | 2.6 | 0.1905 | 3.9 |
| 4/16/2018 23:47 | 2.5 | 19.8 | 5.5 | 2.6 | 0.1884 | 4   |
| 4/16/2018 23:48 | 2.4 | 20.1 | 5.7 | 2.6 | 0.1775 | 4.1 |
| 4/16/2018 23:49 | 3.2 | 19.9 | 5.7 | 2.6 | 0.1939 | 4.4 |
| 4/16/2018 23:50 | 2.8 | 19.9 | 5.6 | 2.6 | 0.1814 | 4.4 |
| 4/16/2018 23:51 | 2.7 | 19.9 | 5.7 | 2.6 | 0.1914 | 4.2 |
| 4/16/2018 23:52 | 3.1 | 19.6 | 5.7 | 2.6 | 0.1934 | 4.1 |
| 4/16/2018 23:53 | 3.4 | 19.7 | 5.7 | 2.6 | 0.1883 | 4.1 |
| 4/16/2018 23:54 | 2.9 | 19.7 | 5.7 | 2.6 | 0.1948 | 4.1 |
| 4/16/2018 23:55 | 4.3 | 19.9 | 5.7 | 2.6 | 0.1782 | 4.4 |
| 4/16/2018 23:56 | 1.9 | 19.8 | 5.7 | 2.6 | 0.1903 | 4.7 |
| 4/16/2018 23:57 | 2.9 | 19.9 | 5.8 | 2.7 | 0.1912 | 4.8 |
| 4/16/2018 23:58 | 3.1 | 19.6 | 5.8 | 2.7 | 0.1881 | 4.9 |
| 4/16/2018 23:59 | 3   | 19.7 | 5.8 | 2.7 | 0.1938 | 5   |
| 4/17/2018 0:00  | 1.8 | 19.7 | 5.8 | 2.7 | 0.182  | 5.1 |
| 4/17/2018 0:01  | 1.2 | 19.6 | 5.9 | 2.7 | 0.1994 | 5   |
| 4/17/2018 0:02  | 2.6 | 19.8 | 5.9 | 2.7 | 0.1836 | 5   |
| 4/17/2018 0:03  | 1.9 | 19.8 | 6   | 2.7 | 0.1928 | 5   |
| 4/17/2018 0:04  | 2.5 | 19.7 | 6   | 2.7 | 0.196  | 4.8 |
| 4/17/2018 0:05  | 3.9 | 20.1 | 6.5 | 2.6 | 0.1829 | 4.2 |
| 4/17/2018 0:06  | 2.2 | 19.9 | 6.5 | 2.6 | 0.1954 | 4.1 |
| 4/17/2018 0:07  | 2.9 | 19.9 | 6.5 | 2.6 | 0.1855 | 4.4 |
| 4/17/2018 0:08  | 3.3 | 20   | 6.6 | 2.6 | 0.196  | 4.7 |
| 4/17/2018 0:09  | 3.7 | 20   | 6.6 | 2.6 | 0.1912 | 4.9 |
| 4/17/2018 0:10  | 2.4 | 20   | 6.9 | 2.6 | 0.1907 | 4.8 |
| 4/17/2018 0:11  | 2.8 | 20.1 | 6.7 | 2.6 | 0.1957 | 4.6 |
| 4/17/2018 0:12  | 2.6 | 19.8 | 6.6 | 2.5 | 0.1868 | 4.7 |
| 4/17/2018 0:13  | 3   | 19.8 | 6.5 | 2.5 | 0.2015 | 4.6 |
| 4/17/2018 0:14  | 2.4 | 19.7 | 6.4 | 2.5 | 0.194  | 4.7 |

|                |     |      |     |     |        |     |
|----------------|-----|------|-----|-----|--------|-----|
| 4/17/2018 0:15 |     | 19.8 | 6.3 | 2.5 | 0.1913 | 4.7 |
| 4/17/2018 0:16 |     | 19.8 | 6.4 | 2.5 | 0.1952 | 4.7 |
| 4/17/2018 0:17 |     | 19.8 | 6.3 | 2.6 | 0.1852 | 4.7 |
| 4/17/2018 0:18 | 1.6 | 19.9 | 6.8 | 2.6 | 0.2012 | 4.8 |
| 4/17/2018 0:19 | 1.3 | 19.7 | 6.6 | 2.6 | 0.1841 | 4.8 |
| 4/17/2018 0:20 |     | 19.5 | 6.3 | 2.6 | 0.2003 | 4.8 |
| 4/17/2018 0:21 |     | 19.5 | 6.2 | 2.6 | 0.1899 | 4.8 |
| 4/17/2018 0:22 |     | 19.3 | 6.4 | 2.6 | 0.1944 | 4.9 |
| 4/17/2018 0:23 |     | 19.3 | 6.3 | 2.6 | 0.1981 | 4.9 |
| 4/17/2018 0:24 | 1.5 | 19.7 | 6.3 | 2.6 | 0.1897 | 4.9 |
| 4/17/2018 0:25 | 6.1 | 19.5 | 6.3 | 2.6 | 0.2004 | 5   |
| 4/17/2018 0:26 | 1.7 | 19.7 | 6.3 | 2.6 | 0.1874 | 5   |
| 4/17/2018 0:27 | 0.5 | 19.5 | 6.6 | 2.7 | 0.2003 | 5   |
| 4/17/2018 0:28 | 2.1 | 19.4 | 6.4 | 2.7 | 0.1934 | 4.9 |
| 4/17/2018 0:29 | 3.4 | 19.5 | 6.4 | 2.7 | 0.1819 | 5   |
| 4/17/2018 0:30 | 2.5 | 19.5 | 6.5 | 2.7 | 0.1998 | 5   |
| 4/17/2018 0:31 | 2.5 | 19.5 | 6.6 | 2.7 | 0.1809 | 4.9 |
| 4/17/2018 0:32 | 2.2 | 19.6 | 6.8 | 2.7 | 0.1942 | 4.9 |
| 4/17/2018 0:33 | 1.9 | 19.5 | 6.7 | 2.7 | 0.2022 | 4.9 |
| 4/17/2018 0:34 | 1.8 | 19.4 | 6.8 | 2.7 | 0.1948 | 4.8 |
| 4/17/2018 0:35 | 2.7 | 19.4 | 6.7 | 2.7 | 0.2065 | 4.9 |
| 4/17/2018 0:36 | 3.1 | 19.4 | 7   | 2.7 | 0.1704 | 4.9 |
| 4/17/2018 0:37 | 3   | 19.4 | 7.4 | 2.7 | 0.2022 | 4.7 |
| 4/17/2018 0:38 | 1.6 | 19.3 | 6.9 | 2.7 | 0.1926 | 4.4 |
| 4/17/2018 0:39 | 2.5 | 19.6 | 7.2 | 2.7 | 0.1881 | 4.3 |
| 4/17/2018 0:40 | 2.6 | 19.4 | 7.1 | 2.7 | 0.2064 | 4.3 |
| 4/17/2018 0:41 | 2.3 | 19.4 | 7.2 | 2.7 | 0.1934 | 4.2 |
| 4/17/2018 0:42 | 3.2 | 19.8 | 7.3 | 2.7 | 0.2099 | 4.3 |
| 4/17/2018 0:43 | 2.5 | 19.6 | 7.8 | 2.7 | 0.2056 | 4.2 |
| 4/17/2018 0:44 | 2.9 | 19.5 | 7.5 | 2.7 | 0.1974 | 4.1 |
| 4/17/2018 0:45 | 1   | 19.6 | 7.7 | 2.7 | 0.2014 | 4.2 |
| 4/17/2018 0:46 | 2.7 | 20.1 | 7.6 | 2.7 | 0.1959 | 4.1 |
| 4/17/2018 0:47 | 2.2 | 19.7 | 7.6 | 2.6 | 0.1975 | 3.3 |
| 4/17/2018 0:48 | 2.4 | 19.7 | 7.2 | 2.6 | 0.1956 | 3.5 |
| 4/17/2018 0:49 | 1.5 | 19.6 | 7.2 | 2.6 | 0.2006 | 3.8 |
| 4/17/2018 0:50 | 1.5 | 19.7 | 7.3 | 2.6 | 0.1988 | 4   |
| 4/17/2018 0:51 | 1.9 | 19.6 | 7.1 | 2.6 | 0.198  | 4.1 |
| 4/17/2018 0:52 | 2.2 | 19.8 | 7.3 | 2.6 | 0.2022 | 4.2 |
| 4/17/2018 0:53 | 0.4 | 19.7 | 7.2 | 2.6 | 0.1847 | 4.3 |
| 4/17/2018 0:54 | 1.9 | 19.4 | 6.9 | 2.6 | 0.1992 | 4.3 |
| 4/17/2018 0:55 | 2.3 | 19.7 | 6.9 | 2.7 | 0.2006 | 4.3 |
| 4/17/2018 0:56 | 2.4 | 19.4 | 6.9 | 2.7 | 0.1977 | 4.3 |
| 4/17/2018 0:57 | 2.6 | 19.5 | 6.8 | 2.7 | 0.2024 | 4.3 |
| 4/17/2018 0:58 | 2.4 | 19.6 | 6.8 | 2.7 | 0.1931 | 4.4 |
| 4/17/2018 0:59 | 2.7 | 19.5 | 6.9 | 2.7 | 0.1972 | 4.4 |
| 4/17/2018 1:00 | 1.9 | 19.5 | 7   | 2.7 | 0.1935 | 4.4 |
| 4/17/2018 1:01 | 1.7 | 19.3 | 6.9 | 2.7 | 0.198  | 4.3 |



|                |     |      |     |     |        |     |
|----------------|-----|------|-----|-----|--------|-----|
| 4/17/2018 1:02 | 1.3 | 19.9 | 7   | 2.7 | 0.2032 | 4.3 |
| 4/17/2018 1:03 | 2.4 | 19.6 | 7   | 2.7 | 0.1927 | 4.4 |
| 4/17/2018 1:04 | 2.1 | 19.8 | 6.9 | 2.7 | 0.2097 | 4.5 |
| 4/17/2018 1:05 | 1   | 19.7 | 6.9 | 2.7 | 0.1936 | 4.2 |
| 4/17/2018 1:06 | 1.5 | 19.5 | 6.9 | 2.7 | 0.2015 | 4.3 |
| 4/17/2018 1:07 | 1.1 | 19.6 | 6.9 | 2.7 | 0.2056 | 4.2 |
| 4/17/2018 1:08 | 2   | 19.8 | 6.9 | 2.7 | 0.1931 | 3.8 |
| 4/17/2018 1:09 | 1.7 | 19.5 | 6.9 | 2.7 | 0.2071 | 3.5 |
| 4/17/2018 1:10 | 0.8 | 19.7 | 6.9 | 2.7 | 0.1911 | 3.5 |
| 4/17/2018 1:11 | 2.5 | 19.6 | 7   | 2.7 | 0.1983 | 3.6 |
| 4/17/2018 1:12 | 2.7 | 19.6 | 6.9 | 2.7 | 0.2037 | 3.9 |
| 4/17/2018 1:13 | 2.3 | 20.1 | 6.8 | 2.7 | 0.196  | 3.9 |
| 4/17/2018 1:14 | 3.1 | 19.8 | 6.8 | 2.7 | 0.209  | 4   |
| 4/17/2018 1:15 | 2.6 | 19.8 | 6.8 | 2.7 | 0.1879 | 4.2 |
| 4/17/2018 1:16 | 2.3 | 19.9 | 6.8 | 2.7 | 0.208  | 4.2 |
| 4/17/2018 1:17 | 3.4 | 20.2 | 6.8 | 2.7 | 0.1939 | 4.2 |
| 4/17/2018 1:18 | 3.2 | 19.9 | 6.7 | 2.7 | 0.2048 | 4.1 |
| 4/17/2018 1:19 | 1.8 | 20   | 6.7 | 2.7 | 0.205  | 4   |
| 4/17/2018 1:20 | 2.9 | 19.9 | 6.7 | 2.7 | 0.1937 | 4   |
| 4/17/2018 1:21 | 2.7 | 20.2 | 6.6 | 2.7 | 0.2004 | 3.9 |
| 4/17/2018 1:22 | 3   | 20.2 | 6.6 | 2.7 | 0.1932 | 4   |
| 4/17/2018 1:23 | 3.6 | 20.3 | 6.6 | 2.7 | 0.2018 | 4   |
| 4/17/2018 1:24 | 3.5 | 20.6 | 6.6 | 2.7 | 0.1946 | 3.9 |
| 4/17/2018 1:25 | 1.9 | 20.8 | 6.6 | 2.7 | 0.1976 | 3.7 |
| 4/17/2018 1:26 | 2.5 | 20.4 | 6.6 | 2.6 | 0.2103 | 3.8 |
| 4/17/2018 1:27 | 2.7 | 20.8 | 6.5 | 2.6 | 0.1873 | 3.8 |
| 4/17/2018 1:28 | 3.5 | 20.8 | 6.4 | 2.6 | 0.2098 | 3.9 |
| 4/17/2018 1:29 | 2.9 | 20.6 | 6.3 | 2.6 | 0.1921 | 3.9 |
| 4/17/2018 1:30 | 2.8 | 20.8 | 6.3 | 2.5 | 0.2003 | 3.8 |
| 4/17/2018 1:31 | 3.8 | 20.5 | 6.2 | 2.5 | 0.2004 | 3.9 |
| 4/17/2018 1:32 | 2.9 | 20.6 | 6.2 | 2.5 | 0.1917 | 3.9 |
| 4/17/2018 1:33 | 3.1 | 20.8 | 6.2 | 2.5 | 0.2009 | 3.8 |
| 4/17/2018 1:34 | 3.8 | 20.2 | 6.2 | 2.5 | 0.1899 | 3.8 |
| 4/17/2018 1:35 | 2   | 20.4 | 6.2 | 2.5 | 0.2055 | 3.8 |
| 4/17/2018 1:36 | 2.1 | 20.5 | 6.2 | 2.5 | 0.19   | 3.1 |
| 4/17/2018 1:37 | 2.1 | 20.2 | 6.1 | 2.5 | 0.2025 | 2.5 |
| 4/17/2018 1:38 | 4.3 | 20.4 | 6.1 | 2.5 | 0.1974 | 3.2 |
| 4/17/2018 1:39 | 2.8 | 20   | 6.2 | 2.6 | 0.1998 | 3.4 |
| 4/17/2018 1:40 | 3.4 | 19.8 | 6.1 | 2.6 | 0.2051 | 3.5 |
| 4/17/2018 1:41 | 4.1 | 20.1 | 6.1 | 2.6 | 0.1922 | 3.7 |
| 4/17/2018 1:42 | 2.8 | 20.1 | 6.1 | 2.6 | 0.2028 | 3.7 |
| 4/17/2018 1:43 | 2.1 | 19.9 | 6   | 2.6 | 0.1963 | 3.8 |
| 4/17/2018 1:44 | 3.2 | 20.3 | 6   | 2.6 | 0.1868 | 3.8 |
| 4/17/2018 1:45 | 3   | 20.2 | 6   | 2.6 | 0.2008 | 3.9 |
| 4/17/2018 1:46 | 2.4 | 20.3 | 5.9 | 2.6 | 0.1898 | 4   |
| 4/17/2018 1:47 | 2.9 | 20.2 | 5.9 | 2.6 | 0.2021 | 4.1 |
| 4/17/2018 1:48 | 2.3 | 20.4 | 5.9 | 2.6 | 0.1855 | 4.1 |

|                |     |      |     |     |        |     |
|----------------|-----|------|-----|-----|--------|-----|
| 4/17/2018 1:49 | 3.8 | 20.4 | 5.9 | 2.6 | 0.1972 | 4.1 |
| 4/17/2018 1:50 | 2.7 | 20.5 | 5.8 | 2.6 | 0.1991 | 4.2 |
| 4/17/2018 1:51 | 2   | 20.4 | 5.8 | 2.6 | 0.1878 | 4.3 |
| 4/17/2018 1:52 | 2.2 | 20.2 | 5.8 | 2.6 | 0.2055 | 4.2 |
| 4/17/2018 1:53 | 2.6 | 20.4 | 5.8 | 2.6 | 0.1882 | 4.1 |
| 4/17/2018 1:54 | 1.8 | 20.2 | 5.7 | 2.6 | 0.1997 | 4.1 |
| 4/17/2018 1:55 | 3   | 20.3 | 5.6 | 2.6 | 0.1987 | 4.2 |
| 4/17/2018 1:56 | 2.4 | 20.5 | 5.6 | 2.6 | 0.1924 | 4.3 |
| 4/17/2018 1:57 | 4.4 | 20.4 | 5.6 | 2.6 | 0.2015 | 4.4 |
| 4/17/2018 1:58 | 2.2 | 20.5 | 5.5 | 2.5 | 0.191  | 4.5 |
| 4/17/2018 1:59 | 1.3 | 20.8 | 5.6 | 2.5 | 0.2064 | 4.6 |
| 4/17/2018 2:00 | 1.5 | 20.7 | 5.5 | 2.5 | 0.1916 | 4.6 |
| 4/17/2018 2:01 | 1.7 | 20.7 | 5.4 | 2.5 | 0.1914 | 4.6 |
| 4/17/2018 2:02 | 1.6 | 20.5 | 5.4 | 2.5 | 0.2007 | 4.6 |
| 4/17/2018 2:03 | 3.4 | 20.3 | 5.5 | 2.5 | 0.1789 | 4.6 |
| 4/17/2018 2:04 | 3   | 20.6 | 5.4 | 2.5 | 0.206  | 4.7 |
| 4/17/2018 2:05 | 3.2 | 20.5 | 5.3 | 2.5 | 0.1901 | 4.8 |
| 4/17/2018 2:06 | 2.7 | 20.4 | 5.3 | 2.5 | 0.194  | 4.7 |
| 4/17/2018 2:07 | 2.3 | 20.6 | 5.3 | 2.5 | 0.195  | 4.8 |
| 4/17/2018 2:08 | 2.6 | 20.7 | 5.2 | 2.5 | 0.189  | 4.9 |
| 4/17/2018 2:09 | 2.9 | 20.6 | 5.2 | 2.5 | 0.1975 | 5   |
| 4/17/2018 2:10 | 3.2 | 20.6 | 5.2 | 2.5 | 0.1806 | 5   |
| 4/17/2018 2:11 | 2.3 | 20.5 | 5.2 | 2.5 | 0.2029 | 5   |
| 4/17/2018 2:12 | 4.6 | 20.8 | 5.2 | 2.5 | 0.1889 | 5   |
| 4/17/2018 2:13 | 2.9 | 20.6 | 5.1 | 2.5 | 0.1939 | 5.1 |
| 4/17/2018 2:14 | 3.3 | 20.7 | 5.1 | 2.4 | 0.197  | 5   |
| 4/17/2018 2:15 | 2   | 20.5 | 5.1 | 2.4 | 0.1765 | 5.1 |
| 4/17/2018 2:16 | 3.5 | 20.6 | 5.1 | 2.4 | 0.1941 | 5.1 |
| 4/17/2018 2:17 | 4   | 20.8 | 5   | 2.4 | 0.1786 | 5.1 |
| 4/17/2018 2:18 | 2.2 | 20.9 | 5   | 2.4 | 0.1954 | 5.1 |
| 4/17/2018 2:19 | 2.5 | 20.3 | 5   | 2.4 | 0.1902 | 5.1 |
| 4/17/2018 2:20 | 3.7 | 20.6 | 5   | 2.4 | 0.1803 | 5.2 |
| 4/17/2018 2:21 | 2.1 | 20.8 | 5   | 2.4 | 0.1868 | 5.2 |
| 4/17/2018 2:22 | 4.6 | 20.9 | 5   | 2.4 | 0.1759 | 5.3 |
| 4/17/2018 2:23 | 3.1 | 20.8 | 4.9 | 2.4 | 0.1923 | 5.2 |
| 4/17/2018 2:24 | 2.5 | 20.7 | 4.9 | 2.4 | 0.1853 | 5.1 |
| 4/17/2018 2:25 | 4.3 | 21.2 | 4.9 | 2.4 | 0.1956 | 5.1 |
| 4/17/2018 2:26 | 2.7 | 20.9 | 4.9 | 2.4 | 0.1962 | 5.1 |
| 4/17/2018 2:27 | 2.3 | 21.1 | 4.9 | 2.4 | 0.1892 | 5   |
| 4/17/2018 2:28 | 3.9 | 21.3 | 4.9 | 2.3 | 0.2061 | 4.5 |
| 4/17/2018 2:29 | 3.4 | 20.9 | 4.9 | 2.4 | 0.1879 | 4.6 |
| 4/17/2018 2:30 | 3.2 | 20.9 | 4.9 | 2.3 | 0.1989 | 4.8 |
| 4/17/2018 2:31 | 3.2 | 20.9 | 4.9 | 2.3 | 0.1947 | 4.8 |
| 4/17/2018 2:32 | 2.7 | 20.9 | 4.9 | 2.3 | 0.1915 | 4.8 |
| 4/17/2018 2:33 | 2.7 | 20.8 | 4.9 | 2.3 | 0.2023 | 4.9 |
| 4/17/2018 2:34 | 3.1 | 20.9 | 4.9 | 2.3 | 0.1798 | 4.9 |
| 4/17/2018 2:35 | 2.6 | 20.4 | 4.9 | 2.3 | 0.1997 | 5   |

|                |     |      |     |     |        |     |
|----------------|-----|------|-----|-----|--------|-----|
| 4/17/2018 2:36 | 1.9 | 20.5 | 4.9 | 2.3 | 0.1864 | 5   |
| 4/17/2018 2:37 | 2.9 | 20.4 | 4.9 | 2.3 | 0.1887 | 5.2 |
| 4/17/2018 2:38 | 2.4 | 20.5 | 4.9 | 2.3 | 0.1914 | 5.2 |
| 4/17/2018 2:39 | 3.1 | 20.4 | 4.9 | 2.4 | 0.1918 | 5.2 |
| 4/17/2018 2:40 | 1.7 | 20.4 | 4.9 | 2.4 | 0.1957 | 5.1 |
| 4/17/2018 2:41 | 3.3 | 20.3 | 4.9 | 2.4 | 0.188  | 5.2 |
| 4/17/2018 2:42 | 1.9 | 20.4 | 4.9 | 2.4 | 0.1997 | 5.1 |
| 4/17/2018 2:43 | 3.3 | 20.4 | 4.9 | 2.4 | 0.1897 | 5.2 |
| 4/17/2018 2:44 | 2.6 | 20.2 | 4.9 | 2.4 | 0.1907 | 5.3 |
| 4/17/2018 2:45 | 2.2 | 20.1 | 4.9 | 2.4 | 0.2036 | 5.4 |
| 4/17/2018 2:46 | 3.7 | 20.4 | 4.9 | 2.4 | 0.1878 | 5.4 |
| 4/17/2018 2:47 | 2.8 | 20.4 | 4.9 | 2.4 | 0.1974 | 5.3 |
| 4/17/2018 2:48 | 3.4 | 20.2 | 4.9 | 2.5 | 0.1932 | 5.4 |
| 4/17/2018 2:49 | 2.1 | 20.1 | 4.9 | 2.5 | 0.1883 | 5.4 |
| 4/17/2018 2:50 | 3.6 | 20.3 | 4.9 | 2.5 | 0.2043 | 5.3 |
| 4/17/2018 2:51 | 2.3 | 19.9 | 5   | 2.5 | 0.1893 | 4   |
| 4/17/2018 2:52 | 2.3 | 20.3 | 5   | 2.4 | 0.1959 | 3.5 |
| 4/17/2018 2:53 | 1.8 | 20.1 | 5   | 2.5 | 0.1887 | 4.1 |
| 4/17/2018 2:54 | 3.4 | 20.2 | 5   | 2.5 | 0.1884 | 4.5 |
| 4/17/2018 2:55 | 2.5 | 20.1 | 5   | 2.5 | 0.1902 | 4.7 |
| 4/17/2018 2:56 | 2.2 | 20.1 | 5   | 2.5 | 0.1873 | 4.7 |
| 4/17/2018 2:57 | 2.4 | 20   | 5   | 2.5 | 0.2048 | 4.8 |
| 4/17/2018 2:58 | 2.1 | 20.4 | 5   | 2.5 | 0.1896 | 4.9 |
| 4/17/2018 2:59 | 0.7 | 20   | 5   | 2.5 | 0.1895 | 4.8 |
| 4/17/2018 3:00 | 1.8 | 20.1 | 5.1 | 2.5 | 0.1964 | 4.8 |
| 4/17/2018 3:01 | 2.4 | 20.3 | 5.1 | 2.5 | 0.1839 | 4.9 |
| 4/17/2018 3:02 | 1.9 | 20.2 | 5.1 | 2.5 | 0.1934 | 5   |
| 4/17/2018 3:03 | 3.5 | 20.2 | 5.1 | 2.5 | 0.1826 | 4.9 |
| 4/17/2018 3:04 | 2.6 | 20.1 | 5.1 | 2.4 | 0.1993 | 5   |
| 4/17/2018 3:05 | 1.8 | 20.2 | 5.1 | 2.5 | 0.1934 | 5   |
| 4/17/2018 3:06 | 2.1 | 20.1 | 5.1 | 2.5 | 0.1866 | 5   |
| 4/17/2018 3:07 | 2.3 | 19.9 | 5.1 | 2.5 | 0.1928 | 4.9 |
| 4/17/2018 3:08 | 2.5 | 20   | 5.1 | 2.5 | 0.1879 | 4.9 |
| 4/17/2018 3:09 | 1.9 | 19.7 | 5.1 | 2.5 | 0.1955 | 4.9 |
| 4/17/2018 3:10 | 3.7 | 20   | 5.1 | 2.5 | 0.1919 | 5.1 |
| 4/17/2018 3:11 | 3.3 | 20   | 5.1 | 2.5 | 0.1871 | 5.2 |
| 4/17/2018 3:12 | 3.7 | 20.2 | 5.2 | 2.5 | 0.197  | 5.3 |
| 4/17/2018 3:13 | 2.5 | 20   | 5.1 | 2.5 | 0.19   | 5.3 |
| 4/17/2018 3:14 | 3   | 20   | 5.2 | 2.5 | 0.199  | 5.4 |
| 4/17/2018 3:15 | 2.7 | 19.9 | 5.2 | 2.5 | 0.1922 | 5.4 |
| 4/17/2018 3:16 | 3.1 | 20   | 5.3 | 2.5 | 0.1958 | 5.4 |
| 4/17/2018 3:17 | 1.8 | 20   | 5.2 | 2.5 | 0.1931 | 5.3 |
| 4/17/2018 3:18 | 2.3 | 20.4 | 5.2 | 2.5 | 0.1834 | 5.4 |
| 4/17/2018 3:19 | 2.6 | 20.2 | 5.3 | 2.5 | 0.201  | 5.2 |
| 4/17/2018 3:20 | 2.1 | 20.1 | 5.2 | 2.5 | 0.1883 | 5.2 |
| 4/17/2018 3:21 | 1.2 | 20.2 | 5.2 | 2.5 | 0.1902 | 5.2 |
| 4/17/2018 3:22 | 1.7 | 20   | 5.3 | 2.5 | 0.2003 | 5.3 |

|                |     |      |     |     |        |     |
|----------------|-----|------|-----|-----|--------|-----|
| 4/17/2018 3:23 | 2   | 20.1 | 5.3 | 2.5 | 0.1968 | 5.2 |
| 4/17/2018 3:24 | 3.6 | 20.2 | 5.3 | 2.4 | 0.1952 | 5.3 |
| 4/17/2018 3:25 | 2.3 | 19.8 | 5.4 | 2.4 | 0.1886 | 5.3 |
| 4/17/2018 3:26 | 3.4 | 20   | 5.3 | 2.4 | 0.1879 | 5.3 |
| 4/17/2018 3:27 | 2.8 | 20   | 5.3 | 2.4 | 0.1964 | 5.3 |
| 4/17/2018 3:28 | 3.2 | 20.1 | 5.3 | 2.4 | 0.1792 | 5.4 |
| 4/17/2018 3:29 | 1.7 | 19.9 | 5.3 | 2.4 | 0.197  | 5.3 |
| 4/17/2018 3:30 | 3   | 19.6 | 5.3 | 2.4 | 0.1909 | 5.1 |
| 4/17/2018 3:31 | 3   | 20   | 5.4 | 2.4 | 0.1882 | 5.2 |
| 4/17/2018 3:32 |     | 19.7 | 5.4 | 2.4 | 0.1964 | 5.4 |
| 4/17/2018 3:33 |     | 19.7 | 5.4 | 2.4 | 0.1791 | 5.5 |
| 4/17/2018 3:34 |     | 19.7 | 5.4 | 2.4 | 0.1986 | 5.4 |
| 4/17/2018 3:35 |     | 19.7 | 5.6 | 2.5 | 0.1913 | 5.5 |
| 4/17/2018 3:36 |     | 19.8 | 5.5 | 2.5 | 0.1889 | 5.6 |
| 4/17/2018 3:37 |     | 19.5 | 5.6 | 2.5 | 0.1995 | 5.5 |
| 4/17/2018 3:38 |     | 19.9 | 5.6 | 2.5 | 0.1858 | 5.5 |
| 4/17/2018 3:39 |     | 19.9 | 5.8 | 2.5 | 0.1986 | 5.6 |
| 4/17/2018 3:40 |     | 19.8 | 5.8 | 2.5 | 0.1869 | 5.6 |
| 4/17/2018 3:41 |     | 19.8 | 5.9 | 2.5 | 0.1976 | 5.5 |
| 4/17/2018 3:42 |     | 19.8 | 5.7 | 2.5 | 0.1913 | 5.5 |
| 4/17/2018 3:43 | 3.4 | 19.7 | 5.8 | 2.5 | 0.1772 | 4.3 |
| 4/17/2018 3:44 | 3.7 | 19.7 | 5.9 | 2.5 | 0.1923 | 3.5 |
| 4/17/2018 3:45 | 7.7 | 19.6 | 6   | 2.5 | 0.179  | 3.9 |
| 4/17/2018 3:46 | 3.6 | 19.6 | 5.9 | 2.5 | 0.1954 | 4.3 |
| 4/17/2018 3:47 | 3.2 | 19.6 | 5.9 | 2.5 | 0.1932 | 4.6 |
| 4/17/2018 3:48 | 3   | 19.5 | 6.2 | 2.5 | 0.1913 | 4.8 |
| 4/17/2018 3:49 | 4   | 19.5 | 6.3 | 2.5 | 0.2032 | 5   |
| 4/17/2018 3:50 | 1.7 | 19.7 | 6.1 | 2.5 | 0.1886 | 5.2 |
| 4/17/2018 3:51 | 3.1 | 19.6 | 6.3 | 2.5 | 0.1994 | 5.3 |
| 4/17/2018 3:52 | 3.3 | 19.6 | 6.3 | 2.5 | 0.189  | 5.4 |
| 4/17/2018 3:53 | 2.8 | 19.5 | 6.3 | 2.5 | 0.1939 | 5.4 |
| 4/17/2018 3:54 | 2.6 | 19.6 | 6.4 | 2.4 | 0.2008 | 5.3 |
| 4/17/2018 3:55 | 2.1 | 19.6 | 6.4 | 2.4 | 0.1763 | 5.3 |
| 4/17/2018 3:56 | 2.9 | 19.6 | 6.5 | 2.4 | 0.2009 | 5.3 |
| 4/17/2018 3:57 | 2.1 | 19.4 | 6.3 | 2.4 | 0.1866 | 5.2 |
| 4/17/2018 3:58 | 4.1 | 19.4 | 6.3 | 2.5 | 0.1891 | 5.3 |
| 4/17/2018 3:59 | 2.7 | 19.5 | 6.3 | 2.5 | 0.1915 | 5.3 |
| 4/17/2018 4:00 | 3.7 | 19.3 | 6.3 | 2.5 | 0.184  | 5.4 |
| 4/17/2018 4:01 | 1.1 | 19.5 | 6.5 | 2.5 | 0.2015 | 5.3 |
| 4/17/2018 4:02 | 4   | 19.7 | 6.5 | 2.5 | 0.1846 | 5.3 |
| 4/17/2018 4:03 | 2.4 | 19.6 | 6.6 | 2.5 | 0.1963 | 5.3 |
| 4/17/2018 4:04 | 1.7 | 19.8 | 6.6 | 2.5 | 0.1958 | 5.4 |
| 4/17/2018 4:05 | 3.1 | 19.6 | 6.6 | 2.5 | 0.186  | 5.5 |
| 4/17/2018 4:06 | 2.4 | 19.2 | 6.4 | 2.5 | 0.1981 | 5.5 |
| 4/17/2018 4:07 | 2.1 | 19.6 | 6.6 | 2.5 | 0.1891 | 5.4 |
| 4/17/2018 4:08 | 1.7 | 19.5 | 6.5 | 2.5 | 0.1988 | 5.4 |
| 4/17/2018 4:09 | 2.5 | 19.7 | 6.5 | 2.5 | 0.1915 | 5.4 |

|                |     |      |     |     |        |     |
|----------------|-----|------|-----|-----|--------|-----|
| 4/17/2018 4:10 | 3.5 | 19.6 | 6.5 | 2.5 | 0.196  | 5.3 |
| 4/17/2018 4:11 | 2.9 | 19.6 | 6.5 | 2.5 | 0.1959 | 4.6 |
| 4/17/2018 4:12 | 2.8 | 19.5 | 6.4 | 2.5 | 0.184  | 3.8 |
| 4/17/2018 4:13 | 1.4 | 19.6 | 6.6 | 2.5 | 0.193  | 3.2 |
| 4/17/2018 4:14 | 2.2 | 19.6 | 6.5 | 2.5 | 0.1878 | 3   |
| 4/17/2018 4:15 | 2.7 | 19.6 | 6.5 | 2.5 | 0.1944 | 2.5 |
| 4/17/2018 4:16 | 2   | 19.7 | 6.4 | 2.5 | 0.1912 | 2.4 |
| 4/17/2018 4:17 | 2   | 19.5 | 6.5 | 2.5 | 0.185  | 2.3 |
| 4/17/2018 4:18 | 2.3 | 19.5 | 6.5 | 2.5 | 0.2005 | 2.6 |
| 4/17/2018 4:19 | 1.9 | 19.9 | 6.5 | 2.6 | 0.1864 | 2.9 |
| 4/17/2018 4:20 | 2   | 19.5 | 6.4 | 2.6 | 0.1901 | 3.1 |
| 4/17/2018 4:21 | 2.3 | 19.6 | 6.5 | 2.5 | 0.1971 | 3.3 |
| 4/17/2018 4:22 | 4.1 | 19.5 | 6.4 | 2.6 | 0.1815 | 3.5 |
| 4/17/2018 4:23 | 2.4 | 19.6 | 6.4 | 2.6 | 0.1969 | 3.6 |
| 4/17/2018 4:24 | 2.7 | 19.7 | 6.5 | 2.6 | 0.1873 | 3.8 |
| 4/17/2018 4:25 | 2.9 | 19.5 | 6.5 | 2.6 | 0.197  | 3.8 |
| 4/17/2018 4:26 | 1.9 | 19.6 | 6.5 | 2.5 | 0.1952 | 4   |
| 4/17/2018 4:27 | 2.7 | 19.5 | 6.5 | 2.5 | 0.1877 | 4.1 |
| 4/17/2018 4:28 | 2.4 | 19.6 | 6.5 | 2.5 | 0.1991 | 4.3 |
| 4/17/2018 4:29 | 2   | 19.6 | 6.5 | 2.5 | 0.1873 | 4.3 |
| 4/17/2018 4:30 | 1.6 | 19.6 | 6.5 | 2.5 | 0.1984 | 4.4 |
| 4/17/2018 4:31 | 2.3 | 19.6 | 6.5 | 2.5 | 0.1908 | 4.5 |
| 4/17/2018 4:32 | 2.2 | 19.7 | 6.5 | 2.5 | 0.1848 | 4.6 |
| 4/17/2018 4:33 | 3   | 19.7 | 6.5 | 2.5 | 0.1936 | 4.7 |
| 4/17/2018 4:34 | 1.5 | 19.8 | 6.5 | 2.5 | 0.1843 | 4.8 |
| 4/17/2018 4:35 | 4.1 | 19.4 | 6.5 | 2.5 | 0.1908 | 4.9 |
| 4/17/2018 4:36 | 3.2 | 19.7 | 6.5 | 2.5 | 0.1845 | 5   |
| 4/17/2018 4:37 | 3.1 | 19.8 | 6.5 | 2.5 | 0.1938 | 5   |
| 4/17/2018 4:38 | 2.7 | 19.9 | 6.5 | 2.5 | 0.19   | 5.1 |
| 4/17/2018 4:39 | 3.5 | 19.7 | 6.5 | 2.5 | 0.1823 | 5.1 |
| 4/17/2018 4:40 | 1.7 | 19.4 | 6.4 | 2.5 | 0.1969 | 5   |
| 4/17/2018 4:41 | 3.1 | 19.7 | 6.4 | 2.5 | 0.1799 | 5.1 |
| 4/17/2018 4:42 | 2.6 | 19.4 | 6.4 | 2.5 | 0.2001 | 5.1 |
| 4/17/2018 4:43 | 2   | 19.7 | 6.4 | 2.5 | 0.1875 | 5   |
| 4/17/2018 4:44 | 2.8 | 19.7 | 6.4 | 2.5 | 0.1913 | 5   |
| 4/17/2018 4:45 | 1.7 | 19.7 | 6.5 | 2.5 | 0.1954 | 5   |
| 4/17/2018 4:46 | 2.2 | 19.7 | 6.5 | 2.5 | 0.1838 | 5.1 |
| 4/17/2018 4:47 | 2.6 | 19.7 | 6.4 | 2.6 | 0.1963 | 5.2 |
| 4/17/2018 4:48 | 3.5 | 19.8 | 6.5 | 2.6 | 0.1841 | 5.3 |
| 4/17/2018 4:49 | 2.5 | 19.7 | 6.5 | 2.6 | 0.1886 | 5.2 |
| 4/17/2018 4:50 | 1.8 | 19.6 | 6.5 | 2.6 | 0.1903 | 5.1 |
| 4/17/2018 4:51 | 1.1 | 19.7 | 6.4 | 2.6 | 0.1869 | 5.1 |
| 4/17/2018 4:52 | 1.6 | 19.5 | 6.5 | 2.6 | 0.1956 | 5.2 |
| 4/17/2018 4:53 | 3.6 | 19.6 | 6.5 | 2.6 | 0.1844 | 5.2 |
| 4/17/2018 4:54 | 2.6 | 19.6 | 6.7 | 2.5 | 0.1975 | 5.1 |
| 4/17/2018 4:55 | 2.1 | 19.6 | 6.6 | 2.5 | 0.1866 | 5   |
| 4/17/2018 4:56 | 2.1 | 19.5 | 6.6 | 2.5 | 0.1892 | 4.9 |

|                |     |      |     |     |        |     |
|----------------|-----|------|-----|-----|--------|-----|
| 4/17/2018 4:57 | 1.6 | 19.5 | 6.6 | 2.5 | 0.1937 | 5   |
| 4/17/2018 4:58 | 2.8 | 19.7 | 6.6 | 2.5 | 0.1795 | 5.1 |
| 4/17/2018 4:59 | 3.4 | 19.8 | 6.7 | 2.5 | 0.1969 | 4.9 |
| 4/17/2018 5:00 | 2.6 | 19.5 | 6.6 | 2.5 | 0.1862 | 4.9 |
| 4/17/2018 5:01 | 1.9 | 19.4 | 6.7 | 2.5 | 0.1846 | 4.8 |
| 4/17/2018 5:02 | 2.2 | 19.9 | 6.9 | 2.5 | 0.1922 | 4.9 |
| 4/17/2018 5:03 | 2.9 | 19.6 | 6.8 | 2.5 | 0.183  | 4.8 |
| 4/17/2018 5:04 | 1.8 | 19.4 | 6.9 | 2.5 | 0.198  | 4.8 |
| 4/17/2018 5:05 | 3.9 | 19.7 | 7   | 2.6 | 0.1893 | 4.8 |
| 4/17/2018 5:06 | 2   | 19.6 | 7.1 | 2.6 | 0.1912 | 4.8 |
| 4/17/2018 5:07 | 2.7 | 19.6 | 7   | 2.5 | 0.1867 | 4.9 |
| 4/17/2018 5:08 | 3.1 | 19.5 | 7   | 2.6 | 0.1912 | 4.8 |
| 4/17/2018 5:09 | 2.3 | 19.6 | 7   | 2.5 | 0.1925 | 4.8 |
| 4/17/2018 5:10 | 0.6 | 19.3 | 7.1 | 2.5 | 0.1836 | 4.8 |
| 4/17/2018 5:11 | 2.1 | 19.8 | 7.3 | 2.5 | 0.1922 | 4.8 |
| 4/17/2018 5:12 | 2.6 | 19.4 | 7.2 | 2.5 | 0.1889 | 4.8 |
| 4/17/2018 5:13 | 2.1 | 19.5 | 7.1 | 2.5 | 0.1795 | 4.9 |
| 4/17/2018 5:14 | 3   | 19.7 | 7   | 2.5 | 0.1977 | 4.9 |
| 4/17/2018 5:15 | 1.1 | 19.5 | 7   | 2.5 | 0.1792 | 5   |
| 4/17/2018 5:16 | 3.6 | 19.3 | 7.1 | 2.5 | 0.2026 | 5   |
| 4/17/2018 5:17 | 3.2 | 19.4 | 7.1 | 2.5 | 0.1872 | 4.9 |
| 4/17/2018 5:18 | 2.8 | 19.5 | 7.1 | 2.5 | 0.1874 | 4.8 |
| 4/17/2018 5:19 | 1.1 | 19.3 | 7   | 2.5 | 0.1908 | 4.8 |
| 4/17/2018 5:20 | 0.8 | 19.4 | 7.1 | 2.5 | 0.186  | 4.9 |
| 4/17/2018 5:21 | 2.3 | 19.3 | 7.2 | 2.5 | 0.1938 | 5   |
| 4/17/2018 5:22 | 2.7 | 19.3 | 7.1 | 2.5 | 0.1866 | 5.1 |
| 4/17/2018 5:23 | 2.5 | 19.2 | 7   | 2.5 | 0.178  | 5   |
| 4/17/2018 5:24 | 1.9 | 19.6 | 7.1 | 2.5 | 0.2009 | 5.1 |
| 4/17/2018 5:25 | 2.7 | 19.8 | 7.1 | 2.5 | 0.1814 | 5.1 |
| 4/17/2018 5:26 | 3.5 | 19.5 | 7.1 | 2.5 | 0.1997 | 5.2 |
| 4/17/2018 5:27 | 4   | 19.3 | 7   | 2.5 | 0.1835 | 5.2 |
| 4/17/2018 5:28 | 3   | 19.4 | 7.1 | 2.5 | 0.1853 | 5.2 |
| 4/17/2018 5:29 | 2.7 | 19.5 | 7   | 2.5 | 0.1875 | 5.2 |
| 4/17/2018 5:30 | 2.5 | 19.5 | 7   | 2.5 | 0.1741 | 4.3 |
| 4/17/2018 5:31 | 1.6 | 19.4 | 7   | 2.5 | 0.1888 | 3.1 |
| 4/17/2018 5:32 | 2.3 | 19.5 | 7   | 2.5 | 0.1796 | 3.1 |
| 4/17/2018 5:33 | 1.5 | 19.4 | 7   | 2.5 | 0.1824 | 2.7 |
| 4/17/2018 5:34 | 2.2 | 19.3 | 6.9 | 2.5 | 0.1902 | 2.6 |
| 4/17/2018 5:35 | 1.2 | 19.5 | 6.9 | 2.5 | 0.1741 | 2.7 |
| 4/17/2018 5:36 | 1.9 | 19.4 | 6.9 | 2.5 | 0.1938 | 2.8 |
| 4/17/2018 5:37 | 2.4 | 19.4 | 6.9 | 2.5 | 0.1875 | 2.8 |
| 4/17/2018 5:38 | 1.9 | 19.5 | 6.9 | 2.5 | 0.1911 | 2.9 |
| 4/17/2018 5:39 | 1.8 | 19.4 | 6.9 | 2.5 | 0.1885 | 3.1 |
| 4/17/2018 5:40 | 3   | 19.2 | 6.8 | 2.5 | 0.1774 | 3.1 |
| 4/17/2018 5:41 | 3.5 | 19.4 | 6.8 | 2.5 | 0.1928 | 3.1 |
| 4/17/2018 5:42 | 2.1 | 19.4 | 6.8 | 2.5 | 0.1798 | 3.2 |
| 4/17/2018 5:43 | 2   | 19.1 | 6.8 | 2.5 | 0.1909 | 3.3 |

|                |     |      |     |     |        |     |
|----------------|-----|------|-----|-----|--------|-----|
| 4/17/2018 5:44 | 2.7 | 19.2 | 6.8 | 2.5 | 0.1884 | 3.4 |
| 4/17/2018 5:45 | 1.8 | 19.4 | 6.8 | 2.5 | 0.1808 | 3.5 |
| 4/17/2018 5:46 | 2.2 | 19.5 | 6.7 | 2.5 | 0.1897 | 3.5 |
| 4/17/2018 5:47 | 1.7 | 19.2 | 6.7 | 2.5 | 0.1841 | 3.7 |
| 4/17/2018 5:48 | 0.7 | 19.4 | 6.7 | 2.5 | 0.1915 | 3.7 |
| 4/17/2018 5:49 | 2   | 19.5 | 6.7 | 2.5 | 0.1872 | 3.7 |
| 4/17/2018 5:50 | 1.3 | 19.3 | 6.7 | 2.5 | 0.184  | 3.6 |
| 4/17/2018 5:51 | 2.7 | 19.5 | 6.7 | 2.5 | 0.1968 | 3.6 |
| 4/17/2018 5:52 | 2.3 | 19.4 | 6.7 | 2.5 | 0.1843 | 3.5 |
| 4/17/2018 5:53 | 1.9 | 19.5 | 6.7 | 2.5 | 0.1982 | 3.7 |
| 4/17/2018 5:54 | 3.2 | 19.6 | 6.7 | 2.5 | 0.1799 | 3.8 |
| 4/17/2018 5:55 | 4.8 | 19.4 | 6.6 | 2.5 | 0.187  | 3.9 |
| 4/17/2018 5:56 | 2.1 | 19.2 | 6.6 | 2.5 | 0.1987 | 4   |
| 4/17/2018 5:57 | 2.7 | 19.1 | 6.6 | 2.5 | 0.1845 | 4   |
| 4/17/2018 5:58 | 2.9 | 19.3 | 6.6 | 2.5 | 0.1966 | 4.1 |
| 4/17/2018 5:59 | 3.1 | 19.2 | 6.6 | 2.5 | 0.1791 | 4.3 |
| 4/17/2018 6:00 | 2   | 19.3 | 6.6 | 2.5 | 0.1944 | 4.3 |
| 4/17/2018 6:01 | 1.9 | 19.5 | 6.6 | 2.5 | 0.1902 | 4.4 |
| 4/17/2018 6:02 | 2.8 | 19.2 | 6.6 | 2.6 | 0.1819 | 4.5 |
| 4/17/2018 6:03 | 2   | 19.4 | 6.6 | 2.6 | 0.1955 | 4.5 |
| 4/17/2018 6:04 | 2.4 | 19.2 | 6.5 | 2.6 | 0.1768 | 4.5 |
| 4/17/2018 6:05 | 3.5 | 19.3 | 6.6 | 2.6 | 0.1977 | 4.6 |
| 4/17/2018 6:06 | 3.4 | 19.3 | 6.5 | 2.6 | 0.1966 | 4.7 |
| 4/17/2018 6:07 | 2.1 | 19.1 | 6.6 | 2.6 | 0.1884 | 4.8 |
| 4/17/2018 6:08 | 1.1 | 19.5 | 6.5 | 2.5 | 0.1927 | 4.5 |
| 4/17/2018 6:09 | 1.9 | 19.3 | 6.5 | 2.5 | 0.1846 | 4.5 |
| 4/17/2018 6:10 | 2.8 | 19.1 | 6.5 | 2.5 | 0.1928 | 4.5 |
| 4/17/2018 6:11 | 1.5 | 19.5 | 6.6 | 2.6 | 0.2015 | 4.6 |
| 4/17/2018 6:12 | 3.1 | 19.3 | 6.6 | 2.6 | 0.1856 | 4.7 |
| 4/17/2018 6:13 | 2.6 | 19.1 | 6.5 | 2.6 | 0.1955 | 4.8 |
| 4/17/2018 6:14 | 3.5 | 19.3 | 6.5 | 2.5 | 0.1852 | 5   |
| 4/17/2018 6:15 | 2.8 | 19.1 | 6.5 | 2.6 | 0.196  | 5.1 |
| 4/17/2018 6:16 | 3   | 19   | 6.5 | 2.6 | 0.1945 | 5.2 |
| 4/17/2018 6:17 | 1   | 19.1 | 6.6 | 2.6 | 0.1813 | 5.2 |
| 4/17/2018 6:18 | 2.2 | 19.3 | 6.6 | 2.6 | 0.1966 | 5.2 |
| 4/17/2018 6:19 | 2   | 19.5 | 6.7 | 2.5 | 0.1858 | 5.2 |
| 4/17/2018 6:20 | 1.7 | 19.1 | 6.8 | 2.5 | 0.1965 | 5.3 |
| 4/17/2018 6:21 | 2.7 | 19.1 | 6.7 | 2.6 | 0.1952 | 5.3 |
| 4/17/2018 6:22 | 2.8 | 19.2 | 6.8 | 2.6 | 0.1926 | 5.3 |
| 4/17/2018 6:23 | 2   | 19.1 | 6.8 | 2.6 | 0.2011 | 5.3 |
| 4/17/2018 6:24 | 3   | 18.9 | 6.9 | 2.6 | 0.1888 | 5.3 |
| 4/17/2018 6:25 | 1.1 | 19.2 | 7   | 2.6 | 0.1985 | 5.3 |
| 4/17/2018 6:26 | 3.7 | 19   | 6.8 | 2.6 | 0.1978 | 5.4 |
| 4/17/2018 6:27 | 2   | 18.9 | 6.9 | 2.6 | 0.1868 | 5.4 |
| 4/17/2018 6:28 | 3.8 | 18.9 | 7   | 2.6 | 0.2043 | 5.4 |
| 4/17/2018 6:29 | 2   | 19   | 7.1 | 2.6 | 0.1895 | 5.5 |
| 4/17/2018 6:30 |     | 19   | 7.5 | 2.6 | 0.2024 | 5.5 |

|                |      |      |     |     |        |     |
|----------------|------|------|-----|-----|--------|-----|
| 4/17/2018 6:31 |      | 18.9 | 7.5 | 2.6 | 0.1959 | 5.5 |
| 4/17/2018 6:32 |      | 18.9 | 7.5 | 2.7 | 0.1944 | 5.5 |
| 4/17/2018 6:33 |      | 18.8 | 7.3 | 2.7 | 0.2039 | 5.5 |
| 4/17/2018 6:34 |      | 18.9 | 7.3 | 2.7 | 0.195  | 5.5 |
| 4/17/2018 6:35 |      | 18.9 | 7.6 | 2.7 | 0.2042 | 5.6 |
| 4/17/2018 6:36 |      | 18.7 | 7.4 | 2.7 | 0.1957 | 5.6 |
| 4/17/2018 6:37 | 2.3  | 18.8 | 7.6 | 2.7 | 0.2037 | 5.6 |
| 4/17/2018 6:38 | 1.3  | 18.7 | 7.6 | 2.8 | 0.2025 | 5.6 |
| 4/17/2018 6:39 | 2.7  | 18.7 | 7.6 | 2.8 | 0.1902 | 5.6 |
| 4/17/2018 6:40 | 1    | 19   | 7.7 | 2.8 | 0.2066 | 5.5 |
| 4/17/2018 6:41 | 1.6  | 18.9 | 7.8 | 2.8 | 0.191  | 5.6 |
| 4/17/2018 6:42 | 1.6  | 19   | 7.6 | 2.8 | 0.2064 | 5.5 |
| 4/17/2018 6:43 | 2.6  | 18.9 | 7.7 | 2.8 | 0.2013 | 5.5 |
| 4/17/2018 6:44 | 1    | 18.6 | 7.7 | 2.8 | 0.1902 | 5.7 |
| 4/17/2018 6:45 | 1.9  | 18.6 | 7.7 | 2.8 | 0.2071 | 5.7 |
| 4/17/2018 6:46 | 2.2  | 18.7 | 7.6 | 2.8 | 0.1907 | 5.6 |
| 4/17/2018 6:47 | 1.6  | 18.5 | 7.9 | 2.8 | 0.2081 | 5.5 |
| 4/17/2018 6:48 | 2.7  | 18.9 | 7.8 | 2.8 | 0.2015 | 5.4 |
| 4/17/2018 6:49 | 3.2  | 18.7 | 7.9 | 2.8 | 0.2042 | 5.2 |
| 4/17/2018 6:50 | 1.1  | 18.8 | 7.9 | 2.9 | 0.203  | 4.9 |
| 4/17/2018 6:51 | 1.2  | 18.8 | 8   | 2.9 | 0.197  | 4.7 |
| 4/17/2018 6:52 | 1    | 18.8 | 8.1 | 2.9 | 0.2065 | 4.6 |
| 4/17/2018 6:53 | 2.5  | 18.8 | 8   | 2.9 | 0.1974 | 4.9 |
| 4/17/2018 6:54 | 1.8  | 18.7 | 8   | 2.9 | 0.199  | 5.2 |
| 4/17/2018 6:55 | 3.1  | 18.7 | 8.3 | 2.9 | 0.2058 | 5.3 |
| 4/17/2018 6:56 | 1.5  | 18.7 | 8.2 | 2.9 | 0.1888 | 5.4 |
| 4/17/2018 6:57 | 1.6  | 18.8 | 8.5 | 2.9 | 0.2113 | 5.5 |
| 4/17/2018 6:58 | 1    | 18.7 | 8.4 | 2.9 | 0.194  | 5.6 |
| 4/17/2018 6:59 | 1.9  | 18.8 | 8.3 | 2.9 | 0.2022 | 5.7 |
| 4/17/2018 7:00 | 2.1  | 18.8 | 8.3 | 2.9 | 0.1964 | 5.7 |
| 4/17/2018 7:01 | 1.6  | 18.7 | 8.1 | 2.9 | 0.1999 | 5.8 |
| 4/17/2018 7:02 | 1.5  | 18.5 | 8.2 | 2.9 | 0.2044 | 5.8 |
| 4/17/2018 7:03 | 1.6  | 18.5 | 8.3 | 2.9 | 0.1946 | 5.8 |
| 4/17/2018 7:04 | 1.6  | 18.7 | 8.4 | 2.9 | 0.2063 | 5.7 |
| 4/17/2018 7:05 | 1.7  | 18.7 | 8.4 | 2.9 | 0.1942 | 5.7 |
| 4/17/2018 7:06 | 2.3  | 18.6 | 8.5 | 3   | 0.2013 | 5.6 |
| 4/17/2018 7:07 | 1.1  | 18.8 | 8.6 | 3   | 0.2074 | 5.6 |
| 4/17/2018 7:08 | -0.1 | 18.7 | 8.7 | 3   | 0.1974 | 5.6 |
| 4/17/2018 7:09 | 1.6  | 18.7 | 8.8 | 3   | 0.2151 | 5.5 |
| 4/17/2018 7:10 | 1.6  | 18.6 | 8.9 | 3   | 0.1976 | 5.5 |
| 4/17/2018 7:11 | 1.4  | 18.6 | 8.9 | 3   | 0.2114 | 5.8 |
| 4/17/2018 7:12 | 0.6  | 18.7 | 8.9 | 3   | 0.2108 | 5.8 |
| 4/17/2018 7:13 | 2.4  | 18.6 | 8.9 | 3   | 0.2005 | 5.7 |
| 4/17/2018 7:14 | 1.8  | 18.7 | 9.1 | 3   | 0.2175 | 5.7 |
| 4/17/2018 7:15 | -0.6 | 18.7 | 9.1 | 3   | 0.1972 | 5.7 |
| 4/17/2018 7:16 | 1.7  | 18.6 | 9.2 | 3.1 | 0.2147 | 5.7 |
| 4/17/2018 7:17 | 2.3  | 18.7 | 9.2 | 3.1 | 0.2071 | 5.7 |



|                |     |      |      |      |      |      |        |     |
|----------------|-----|------|------|------|------|------|--------|-----|
| 4/17/2018 7:18 |     |      | 1.5  | 18.7 | 9.4  | 3.1  | 0.2172 | 5.6 |
| 4/17/2018 7:19 |     |      | 1.6  | 18.5 | 9.4  | 3.1  | 0.2077 | 5.6 |
| 4/17/2018 7:20 |     |      | 1.5  | 18.7 | 9.4  | 3.1  | 0.2048 | 5.4 |
| 4/17/2018 7:21 |     |      | 3    | 18.5 | 9.5  | 3.2  | 0.2125 | 5.4 |
| 4/17/2018 7:22 |     |      | 2    | 18.6 | 9.4  | 3.2  | 0.2011 | 5.5 |
| 4/17/2018 7:23 |     |      | 1.3  | 18.6 | 9.4  | 3.2  | 0.2093 | 5.5 |
| 4/17/2018 7:24 |     |      | 2.5  | 18.4 | 9.6  | 3.3  | 0.2068 | 5.5 |
| 4/17/2018 7:25 |     |      | 0.4  | 18.4 | 9.6  | 3.3  | 0.2062 | 5.5 |
| 4/17/2018 7:26 |     |      | 2.2  | 18.5 | 9.5  | 3.3  | 0.2146 | 5.6 |
| 4/17/2018 7:27 |     |      | 1.9  | 18.3 | 9.6  | 3.4  | 0.2025 | 5.7 |
| 4/17/2018 7:28 |     |      | 2.6  | 18.6 | 9.6  | 3.4  | 0.2127 | 5.5 |
| 4/17/2018 7:29 |     |      | 0.9  | 18.6 | 9.6  | 3.4  | 0.2034 | 5.3 |
| 4/17/2018 7:30 |     |      | 2.3  | 18.4 | 9.7  | 3.5  | 0.2115 | 5.1 |
| 4/17/2018 7:31 |     |      | 2.9  | 18.5 | 9.6  | 3.5  | 0.2179 | 5.2 |
| 4/17/2018 7:32 |     |      | 1.4  | 18.1 | 9.6  | 3.5  | 0.1996 | 5.4 |
| 4/17/2018 7:33 |     |      | 1.6  | 18.6 | 9.6  | 3.6  | 0.2124 | 5.5 |
| 4/17/2018 7:34 |     |      | 2.5  | 18.6 | 9.7  | 3.6  | 0.2053 | 5.5 |
| 4/17/2018 7:35 |     |      | 0.9  | 18.5 | 9.7  | 3.6  | 0.2105 | 5.5 |
| 4/17/2018 7:36 |     |      | 0.3  | 18.7 | 9.8  | 3.6  | 0.2114 | 5.7 |
| 4/17/2018 7:37 |     |      | 2.3  | 18.7 | 9.8  | 3.7  | 0.2086 | 5.7 |
| 4/17/2018 7:38 |     |      | 1.2  | 18.5 | 10   | 3.7  | 0.2194 | 5.6 |
| 4/17/2018 7:39 |     |      | 2.4  | 20.2 | 10   | 3.7  | 0.2041 | 5.7 |
| 4/17/2018 7:40 |     |      | 3    | 19.9 | 9.9  | 3.7  | 0.2214 | 5.6 |
| 4/17/2018 7:41 |     |      | 3    | 17.9 | 9.9  | 3.7  | 0.2137 | 5.5 |
| 4/17/2018 7:42 |     |      | 0.1  | 18.3 | 9.9  | 3.8  | 0.2101 | 5.5 |
| 4/17/2018 7:43 |     |      | 2.7  | 18.5 | 9.9  | 3.8  | 0.2195 | 5.5 |
| 4/17/2018 7:44 | 0.4 | 0.2  | 0.5  | 18.6 | 10.2 | 3.8  | 0.203  | 5.5 |
| 4/17/2018 7:45 | 0.4 | 0.2  | 1.5  | 18.9 | 10.1 | 3.8  | 0.2115 | 5.4 |
| 4/17/2018 7:46 | 0.5 | 0    | 2.1  | 18.8 | 10   | 3.8  | 0.2042 | 5.4 |
| 4/17/2018 7:47 | 0.4 | 0.4  | 2.5  | 18.8 | 10   | 3.8  | 0.2129 | 5.2 |
| 4/17/2018 7:48 | 0.4 | 0.2  | 2.4  | 18.6 | 10.1 | 3.8  | 0.2232 | 5   |
| 4/17/2018 7:49 | 0.4 | 0.7  | 1.7  | 18.9 | 9.9  | 3.8  | 0.2102 | 4.8 |
| 4/17/2018 7:50 | 0.5 | 0.6  | 1.4  | 18.8 | 10   | 3.8  | 0.2169 | 4.7 |
| 4/17/2018 7:51 | 0.5 | 0.7  | 2.4  | 18.7 | 10   | 3.8  | 0.2072 | 4.7 |
| 4/17/2018 7:52 | 0.5 | -0.1 | 2.6  | 18.9 | 10   | 3.8  | 0.2165 | 4.8 |
| 4/17/2018 7:53 | 0.5 | 0.2  | 2.6  | 18.8 | 9.9  | 3.8  | 0.2151 | 4.7 |
| 4/17/2018 7:54 | 0.6 | 0.6  | 0.8  | 18.6 | 9.9  | 3.8  | 0.2112 | 4.5 |
| 4/17/2018 7:55 | 0.6 | 0.2  | 1    | 18.7 | 10   | 3.8  | 0.2149 | 4.4 |
| 4/17/2018 7:56 | 0.6 | 0.3  | 1.4  | 18.7 | 9.9  | 3.8  | 0.213  | 4.4 |
| 4/17/2018 7:57 | 0.6 | 0.3  | 3.4  | 19   | 10   | 3.8  | 0.211  | 4.3 |
| 4/17/2018 7:58 | 0.6 | 0.1  | 2.8  | 19   | 9.9  | 3.8  | 0.2226 | 4.4 |
| 4/17/2018 7:59 | 0.6 | 3.2  | 2.1  | 18.7 | 9.9  | 3.8  | 0.2035 | 4.5 |
| 4/17/2018 8:00 | 0.6 | 0.6  | 1.7  | 18.6 | 9.9  | 3.8  | 0.2216 | 4.5 |
| 4/17/2018 8:01 | 0.6 | 0.7  | -0.4 | 18.7 | 9.9  | 3.8  | 0.2081 | 4.6 |
| 4/17/2018 8:02 | 0.6 | 1    | 2    | 18.9 | 9.9  | 3.7  | 0.21   | 4.7 |
| 4/17/2018 8:03 | 0.5 | 1    | 2    | 19.1 | 10.4 | 6.4  | 0.2242 | 4.8 |
| 4/17/2018 8:04 | 0.5 | 0.2  | 2.5  | 19.9 | 15.3 | 25.4 | 0.3366 | 4.8 |

|                |     |     |     |      |      |      |        |     |
|----------------|-----|-----|-----|------|------|------|--------|-----|
| 4/17/2018 8:05 | 0.5 | 0.7 | 1.2 | 20.9 | 16.4 | 26.3 | 0.4222 | 4.8 |
| 4/17/2018 8:06 | 0.5 | 0.6 | 1.6 | 21.7 | 17.6 | 29.4 | 0.5687 | 4.8 |
| 4/17/2018 8:07 | 0.4 | 0.9 | 3   | 22.7 | 18.1 | 31   | 0.7024 | 4.9 |
| 4/17/2018 8:08 | 0.4 |     | 2.6 | 23.7 | 18.2 | 31.1 | 0.8338 | 4.9 |
| 4/17/2018 8:09 | 0.2 |     | 3.3 | 23.2 | 18.1 | 31.3 | 0.858  | 4.8 |
| 4/17/2018 8:10 | 0.2 |     | 1.3 | 22.7 | 17.9 | 31.3 | 0.908  | 4.9 |
| 4/17/2018 8:11 | 0.1 |     | 1.2 | 22.7 | 17.6 | 31.3 | 0.8977 | 4.9 |
| 4/17/2018 8:12 | 0.2 |     | 3.5 | 22.1 | 17.6 | 31.3 | 0.9124 | 5   |
| 4/17/2018 8:13 | 0.2 |     | 0.9 | 21.9 | 17   | 31   | 0.834  | 5   |
| 4/17/2018 8:14 | 0.3 |     | 3   | 21.9 | 16.8 | 30.6 | 0.8732 | 5.1 |
| 4/17/2018 8:15 | 0.3 |     | 2.4 | 21.7 | 16.7 | 30.1 | 0.8836 | 5   |
| 4/17/2018 8:16 | 0.3 |     | 1.7 | 21.5 | 16.6 | 29.5 | 0.8818 | 5   |
| 4/17/2018 8:17 | 0.3 |     | 2.4 | 21.1 | 16.1 | 28.6 | 0.8452 | 5.1 |
| 4/17/2018 8:18 | 0.4 |     | 2.3 | 21.4 | 16.3 | 27.9 | 0.9024 | 5   |
| 4/17/2018 8:19 | 0.4 |     | 3.1 | 21.2 | 16.2 | 27.4 | 0.9172 | 4.8 |
| 4/17/2018 8:20 | 0.3 |     | 2.4 | 21.3 | 16.2 | 26.8 | 0.9353 | 5   |
| 4/17/2018 8:21 | 0.3 |     | 2.4 | 21.2 | 16.2 | 26.5 | 0.93   | 5.1 |
| 4/17/2018 8:22 | 0.3 |     | 2   | 21.2 | 16   | 26.2 | 0.9293 | 5.1 |
| 4/17/2018 8:23 | 0.4 |     | 0.7 | 20.9 | 15.8 | 25.9 | 0.8752 | 5.2 |
| 4/17/2018 8:24 | 0.5 |     | 1.9 | 20.8 | 15.6 | 25.5 | 0.8545 | 5.1 |
| 4/17/2018 8:25 | 0.5 |     | 1.4 | 21.1 | 15.5 | 25.1 | 0.8512 | 5.1 |
| 4/17/2018 8:26 | 0.5 |     | 1   | 20.9 | 15.6 | 25   | 0.8961 | 5   |
| 4/17/2018 8:27 | 0.5 |     | 1.7 | 20.6 | 15.5 | 24.6 | 0.8819 | 5.1 |
| 4/17/2018 8:28 | 0.4 |     | 1.7 | 20.7 | 15.3 | 24.3 | 0.839  | 4.8 |
| 4/17/2018 8:29 | 0.4 |     | 0.9 | 20.5 | 15.2 | 23.9 | 0.8701 | 4.8 |
| 4/17/2018 8:30 | 0.5 |     | 2.2 | 20.4 | 15.2 | 23.5 | 0.8422 | 5   |
| 4/17/2018 8:31 | 0.5 |     | 2.5 | 20.6 | 15.1 | 23.1 | 0.8422 | 4.3 |
| 4/17/2018 8:32 | 0.5 |     | 3   | 20.4 | 15.2 | 23   | 0.8604 | 4.2 |
| 4/17/2018 8:33 | 0.6 |     | 3.2 | 20.2 | 15.2 | 22.9 | 0.8202 | 3.8 |
| 4/17/2018 8:34 | 0.6 |     | 1.8 | 20.3 | 15.2 | 22.7 | 0.829  | 3.9 |
| 4/17/2018 8:35 | 0.6 |     | 0.1 | 20.3 | 15   | 22.4 | 0.8345 | 4.1 |
| 4/17/2018 8:36 | 0.6 |     | 1.6 | 20.1 | 14.8 | 22.3 | 0.8098 | 4.2 |
| 4/17/2018 8:37 | 0.6 |     | 2   | 20.4 | 14.6 | 21.9 | 0.7836 | 4.1 |
| 4/17/2018 8:38 | 0.6 |     | 2.8 | 20.1 | 14.6 | 21.6 | 0.776  | 4.1 |
| 4/17/2018 8:39 | 0.6 |     | 2.2 | 19.8 | 14.5 | 21.4 | 0.7975 | 4.3 |
| 4/17/2018 8:40 | 0.6 |     | 2.8 | 20   | 14.4 | 21.1 | 0.7905 | 4.3 |
| 4/17/2018 8:41 | 0.5 |     | 2.7 | 20.2 | 14.4 | 20.8 | 0.7695 | 4.4 |
| 4/17/2018 8:42 | 0.5 |     | 1.8 | 20.2 | 14.3 | 20.6 | 0.7588 | 4.4 |
| 4/17/2018 8:43 | 0.6 |     | 2.7 | 20   | 14.3 | 20.3 | 0.7525 | 4.4 |
| 4/17/2018 8:44 | 0.6 |     | 2.4 | 20.1 | 14.2 | 20   | 0.7597 | 4.5 |
| 4/17/2018 8:45 | 0.5 |     | 2.3 | 20   | 14.3 | 19.9 | 0.7866 | 4.7 |
| 4/17/2018 8:46 | 0.5 |     | 1.9 | 19.9 | 14.2 | 19.9 | 0.7551 | 4.7 |
| 4/17/2018 8:47 | 0.5 |     | 2   | 20   | 14.1 | 19.7 | 0.7521 | 4.7 |
| 4/17/2018 8:48 | 0.6 |     | 3.3 | 20   | 14.1 | 19.4 | 0.7154 | 4.5 |
| 4/17/2018 8:49 | 0.6 |     | 2.5 | 20   | 14   | 19.1 | 0.7348 | 4.5 |
| 4/17/2018 8:50 | 0.6 |     | 2.9 | 19.8 | 14   | 18.8 | 0.7224 | 4.5 |
| 4/17/2018 8:51 | 0.6 |     | 2.4 | 20   | 13.9 | 18.6 | 0.709  | 4.4 |

|                |     |     |     |      |      |      |        |     |
|----------------|-----|-----|-----|------|------|------|--------|-----|
| 4/17/2018 8:52 | 0.6 |     | 3   | 19.7 | 13.9 | 18.5 | 0.7239 | 4.5 |
| 4/17/2018 8:53 | 0.5 |     | 2.1 | 19.9 | 13.9 | 18.2 | 0.7153 | 4.6 |
| 4/17/2018 8:54 | 0.6 |     | 2.5 | 19.7 | 13.8 | 17.8 | 0.6952 | 4.8 |
| 4/17/2018 8:55 | 0.5 |     | 2   | 19.9 | 13.8 | 17.7 | 0.7196 | 4.8 |
| 4/17/2018 8:56 | 0.6 |     | 1.6 | 19.8 | 13.7 | 17.5 | 0.6842 | 4.8 |
| 4/17/2018 8:57 | 0.5 |     | 1.2 | 19.8 | 13.7 | 17.4 | 0.696  | 4.8 |
| 4/17/2018 8:58 | 0.6 |     | 2.6 | 19.7 | 13.7 | 17.3 | 0.6784 | 4.7 |
| 4/17/2018 8:59 | 0.5 |     | 2   | 19.7 | 13.6 | 17.3 | 0.7138 | 4.7 |
| 4/17/2018 9:00 | 0.5 |     | 0.7 | 19.4 | 13.5 | 17.3 | 0.7135 | 4.7 |
| 4/17/2018 9:01 | 0.5 |     | 1.2 | 19.7 | 13.5 | 17.1 | 0.6809 | 4.6 |
| 4/17/2018 9:02 | 0.5 |     | 2.8 | 19.5 | 13.5 | 17   | 0.6905 | 4.7 |
| 4/17/2018 9:03 | 0.5 |     | 2.5 | 19.7 | 13.5 | 16.8 | 0.6518 | 4.5 |
| 4/17/2018 9:04 | 0.6 |     | 1.6 | 19.7 | 13.5 | 16.5 | 0.6572 | 4.5 |
| 4/17/2018 9:05 | 0.7 |     | 0.4 | 19.7 | 13.5 | 16.4 | 0.6496 | 4.5 |
| 4/17/2018 9:06 | 0.7 |     | 1.8 | 19.6 | 13.4 | 16.3 | 0.6761 | 4.6 |
| 4/17/2018 9:07 | 0.5 |     | 2.7 | 19.4 | 13.3 | 16.2 | 0.6804 | 4.7 |
| 4/17/2018 9:08 | 0.5 |     | 2   | 19.6 | 13.3 | 15.9 | 0.6293 | 4.9 |
| 4/17/2018 9:09 | 0.6 |     | 2.2 | 19.6 | 13.3 | 15.7 | 0.663  | 4.9 |
| 4/17/2018 9:10 | 0.6 | 0.8 | 1.7 | 19.6 | 13.3 | 15.6 | 0.6587 | 5   |
| 4/17/2018 9:11 | 0.5 | 1.4 | 2.2 | 19.5 | 13.2 | 15.5 | 0.6478 | 5   |
| 4/17/2018 9:12 | 0.5 | 2   | 2   | 19.5 | 13.2 | 15.5 | 0.6531 | 5.1 |
| 4/17/2018 9:13 | 0.5 | 1.2 | 1.9 | 19.5 | 13.2 | 15.4 | 0.622  | 5.2 |
| 4/17/2018 9:14 | 0.6 | 2.5 | 0.4 | 19.5 | 13.2 | 15.2 | 0.6332 | 4.8 |
| 4/17/2018 9:15 | 0.7 | 1.1 | 2.5 | 19.4 | 13.1 | 15   | 0.6189 | 4.9 |
| 4/17/2018 9:16 | 0.7 | 7.5 | 2.2 | 19.6 | 13.1 | 14.8 | 0.621  | 5   |
| 4/17/2018 9:17 | 0.7 | 7.7 | 1.3 | 19.3 | 13.1 | 14.6 | 0.6256 | 5   |
| 4/17/2018 9:18 | 0.7 | 7.3 | 2.1 | 19.8 | 13.1 | 14.4 | 0.5995 | 4.8 |
| 4/17/2018 9:19 | 0.8 | 7.4 | 3   | 19.8 | 13.2 | 14.1 | 0.5943 | 4.8 |
| 4/17/2018 9:20 | 1.4 | 7.8 | 3.3 | 21.2 | 14   | 13.6 | 0.4856 | 4.9 |
| 4/17/2018 9:21 | 2.3 | 7.9 | 3.2 | 21.3 | 14.3 | 12.6 | 0.4198 | 4.9 |
| 4/17/2018 9:22 | 3.2 | 4.1 | 1.6 | 21.7 | 14.1 | 11.7 | 0.3953 | 4.6 |
| 4/17/2018 9:23 | 3.9 | 4.2 | 2.1 | 21.9 | 14   | 10.7 | 0.3675 | 4.3 |
| 4/17/2018 9:24 | 4.1 | 5.8 | 4.6 | 21.9 | 13.9 | 9.6  | 0.3932 | 3.7 |
| 4/17/2018 9:25 | 4.2 | 4.7 | 2.9 | 22.1 | 13.8 | 8.6  | 0.3646 | 4   |
| 4/17/2018 9:26 | 4.3 | 5.3 | 2.1 | 22.5 | 13.8 | 7.6  | 0.36   | 4.2 |
| 4/17/2018 9:27 | 4.6 | 5.3 | 2.4 | 22.7 | 13.8 | 6.5  | 0.3457 | 4.4 |
| 4/17/2018 9:28 | 5.1 | 6.3 | 2.4 | 23.5 | 13.9 | 5.6  | 0.3197 | 4.6 |
| 4/17/2018 9:29 | 5.5 | 6.5 | 3.2 | 23.6 | 13.9 | 5.1  | 0.3212 | 4.7 |
| 4/17/2018 9:30 | 6.1 | 6.9 | 3   | 23.9 | 13.9 | 4.7  | 0.2985 | 4.8 |
| 4/17/2018 9:31 | 6.4 | 6.6 | 2.4 | 23.9 | 14.1 | 4.4  | 0.31   | 5   |
| 4/17/2018 9:32 | 6.3 | 5.1 | 4   | 22.3 | 14.4 | 4.2  | 0.3302 | 5   |
| 4/17/2018 9:33 | 5.6 | 5.2 | 3.2 | 22.2 | 15.1 | 4    | 0.3353 | 5   |
| 4/17/2018 9:34 | 4.7 | 4.4 | 3.2 | 22   | 14.9 | 3.8  | 0.3599 | 4.9 |
| 4/17/2018 9:35 | 4   | 3.2 | 2.9 | 21.3 | 14.9 | 14.2 | 0.364  | 5   |
| 4/17/2018 9:36 | 3.1 | 0.9 | 2.9 | 20.6 | 27.5 | 44.4 | 0.4369 | 5   |
| 4/17/2018 9:37 | 1.9 | 0.9 | 1.5 | 21.2 | 34.9 | 70.9 | 0.6278 | 5   |
| 4/17/2018 9:38 | 0.9 | 0.7 | 2.2 | 22.9 | 39.3 | 91.4 | 0.9329 | 5   |

|                 |     |      |      |      |      |       |        |     |
|-----------------|-----|------|------|------|------|-------|--------|-----|
| 4/17/2018 9:39  | 0.5 | 1.2  |      | 24.9 | 41.4 | 98    | 1.2313 | 4.9 |
| 4/17/2018 9:40  | 0.4 | 0.4  |      | 28.2 | 41.6 | 101.3 | 1.7905 | 4.9 |
| 4/17/2018 9:41  | 0.5 | 0.1  |      | 27.3 | 39   | 89.1  | 1.9148 | 4.9 |
| 4/17/2018 9:42  | 0.5 | 0.8  |      | 27.6 | 39.1 | 95.3  | 2.2448 | 5   |
| 4/17/2018 9:43  | 0.4 | 0.7  |      | 27.3 | 39.3 | 96.7  | 2.339  | 5   |
| 4/17/2018 9:44  | 0.4 | 0.8  | 2.3  | 27.1 | 38.5 | 94.6  | 2.3532 | 5   |
| 4/17/2018 9:45  | 0.4 | 0.6  | 3    | 26.5 | 36.6 | 88.9  | 2.2305 | 5   |
| 4/17/2018 9:46  | 0.4 | 0.5  | 4.9  | 26.8 | 37.2 | 91.5  | 2.4433 | 5.1 |
| 4/17/2018 9:47  | 0.3 | 0.6  |      | 26   | 37   | 92.7  | 2.482  | 5.1 |
| 4/17/2018 9:48  | 0.3 | 0.4  |      | 25.5 | 34.9 | 86.5  | 2.3052 | 5.2 |
| 4/17/2018 9:49  | 0.4 | 0.3  | 3.4  | 25.2 | 33.3 | 82    | 2.2538 | 5   |
| 4/17/2018 9:50  | 0.4 | 0.4  | 4.3  | 24.8 | 32.5 | 79.6  | 2.2338 | 4.9 |
| 4/17/2018 9:51  | 0.4 | -0.1 |      | 25   | 33.4 | 80.6  | 2.3817 | 4.6 |
| 4/17/2018 9:52  | 0.4 | 0.4  | 3.7  | 25   | 33.7 | 80.7  | 2.409  | 4.4 |
| 4/17/2018 9:53  | 0.3 | 0.5  |      | 24.6 | 33.1 | 80.6  | 2.4218 | 4.4 |
| 4/17/2018 9:54  | 0.3 | 0.8  | 3.4  | 24.4 | 32.6 | 80.3  | 2.3817 | 4.5 |
| 4/17/2018 9:55  | 0.3 | 0.9  | 3.1  | 23.7 | 31.6 | 79.8  | 2.3288 | 4.6 |
| 4/17/2018 9:56  | 0.3 | 1.3  | 3.5  | 24   | 31.2 | 76.8  | 2.3028 | 4.6 |
| 4/17/2018 9:57  | 0.3 | 0.4  | 3.4  | 23.9 | 31.6 | 78.6  | 2.37   | 4.7 |
| 4/17/2018 9:58  | 0.4 | 1    | 2.4  | 23.5 | 30.5 | 75.7  | 2.2312 | 4.6 |
| 4/17/2018 9:59  | 0.4 | 1    | 3.5  | 23.1 | 28.6 | 68.5  | 2.1013 | 4.5 |
| 4/17/2018 10:00 | 0.4 | 0.7  | 2.9  | 23.2 | 28.9 | 68.7  | 2.1538 | 4.4 |
| 4/17/2018 10:01 | 0.4 | 0.9  | 2.9  | 23.1 | 29.2 | 71.2  | 2.1802 | 4.4 |
| 4/17/2018 10:02 | 0.5 | 0.9  | 2    | 22.8 | 27.3 | 63.8  | 2.0397 | 4.3 |
| 4/17/2018 10:03 | 0.5 | 1.3  | 2.9  | 22.6 | 27.9 | 64.1  | 2.1267 | 3.7 |
| 4/17/2018 10:04 | 0.5 | 1.5  | 2.8  | 22.5 | 27.7 | 64.4  | 2.1122 | 4.1 |
| 4/17/2018 10:05 | 0.5 | 1.2  | 2.4  | 22.7 | 26.7 | 64.3  | 2.0275 | 4.4 |
| 4/17/2018 10:06 | 0.5 | 0.8  | 3    | 22.7 | 28.1 | 65.1  | 2.1845 | 4.7 |
| 4/17/2018 10:07 | 0.5 | 1.3  | 3.5  | 22.3 | 27   | 65.4  | 2.0922 | 4.8 |
| 4/17/2018 10:08 | 0.4 | 1    | 2.4  | 22.1 | 27.2 | 65.8  | 2.1292 | 4.9 |
| 4/17/2018 10:09 | 0.4 | 0.6  | 3.8  | 22.2 | 26.8 | 66.1  | 2.0942 | 5   |
| 4/17/2018 10:10 | 0.4 | 0.6  | 3.2  | 22.2 | 26.4 | 66.2  | 2.0583 | 5.1 |
| 4/17/2018 10:11 | 0.4 | 0.7  | 3    | 21.8 | 25.9 | 66    | 2.0098 | 5.2 |
| 4/17/2018 10:12 | 0.5 | 0.5  | 3.6  | 22.1 | 25.8 | 65.6  | 2.046  | 5.1 |
| 4/17/2018 10:13 | 0.4 | 0.3  | 2.2  | 21.7 | 25.4 | 65.5  | 1.9843 | 5   |
| 4/17/2018 10:14 | 0.4 | 0.5  | 2.9  | 21.9 | 24.9 | 60.9  | 1.9483 | 4.9 |
| 4/17/2018 10:15 | 0.5 | 0.9  | 4.1  | 21.8 | 24.6 | 60.2  | 1.9363 | 4.8 |
| 4/17/2018 10:16 | 0.5 | 1.1  | 1.8  | 21.9 | 25.1 | 62.2  | 2.0003 | 4.9 |
| 4/17/2018 10:17 | 0.5 | 1.3  | 2.5  | 21.2 | 24   | 57.5  | 1.9058 | 5.1 |
| 4/17/2018 10:18 | 0.4 | 1.2  | -0.7 | 21.8 | 24.4 | 57.7  | 1.9618 | 5.1 |
| 4/17/2018 10:19 | 0.4 | 1    | 2.1  | 21.5 | 23.6 | 57.7  | 1.86   | 5.1 |
| 4/17/2018 10:20 | 0.5 | 1.3  | 2    | 21.4 | 23.1 | 57.5  | 1.8177 | 5   |
| 4/17/2018 10:21 | 0.5 | 1.4  | 2.5  | 21.5 | 23.3 | 57.6  | 1.858  | 4.9 |
| 4/17/2018 10:22 | 0.6 | 0.7  | 2.8  | 21.3 | 22.9 | 57.5  | 1.809  | 4.9 |
| 4/17/2018 10:23 | 0.6 | 1.3  | 1    | 21.2 | 23   | 57.5  | 1.8357 | 4.7 |
| 4/17/2018 10:24 | 0.6 | 1.2  | 2.5  | 20.9 | 22   | 57    | 1.759  | 3.9 |
| 4/17/2018 10:25 | 0.6 | 0.5  | 2    | 21.1 | 22.4 | 56.6  | 1.8077 | 3.9 |

|                 |     |      |     |      |      |       |        |     |
|-----------------|-----|------|-----|------|------|-------|--------|-----|
| 4/17/2018 10:26 | 0.6 | 0.9  | 1.8 | 21.1 | 22.1 | 56.1  | 1.7818 | 3.4 |
| 4/17/2018 10:27 | 0.5 | 0.5  | 2.7 | 21.1 | 21.2 | 55    | 1.725  | 3.1 |
| 4/17/2018 10:28 | 0.5 | -0.1 | 2.4 | 21.2 | 21.3 | 50.2  | 1.7188 | 3.3 |
| 4/17/2018 10:29 | 0.5 | 1.6  | 2.4 | 20.9 | 21.6 | 52.5  | 1.7397 | 3.5 |
| 4/17/2018 10:30 | 0.5 | 1    | 1.9 | 21   | 21   | 50.3  | 1.6818 | 3.5 |
| 4/17/2018 10:31 | 0.5 | 1.4  | 3.7 | 20.9 | 20.9 | 49.4  | 1.6965 | 3.6 |
| 4/17/2018 10:32 | 0.6 | 0.7  | 2.3 | 20.9 | 20.9 | 49.6  | 1.6897 | 3.7 |
| 4/17/2018 10:33 | 0.6 | 1.4  | 2.5 | 20.9 | 20.4 | 49.4  | 1.6465 | 3.8 |
| 4/17/2018 10:34 | 0.6 | 1.4  | 3   | 20.8 | 20.5 | 49.2  | 1.6705 | 3.9 |
| 4/17/2018 10:35 | 0.6 | 0.5  | 1.3 | 21   | 20   | 49.1  | 1.6928 | 3.9 |
| 4/17/2018 10:36 | 0.6 | 1.4  | 1.8 | 20.8 | 20   | 49    | 1.6492 | 3.9 |
| 4/17/2018 10:37 | 0.7 | 1.1  | 2.4 | 20.7 | 19.6 | 48.6  | 1.5867 | 3.8 |
| 4/17/2018 10:38 | 0.7 | 0.7  | 2.3 | 20.6 | 19   | 48    | 1.5183 | 3.8 |
| 4/17/2018 10:39 | 0.7 | 1.3  | 5.7 | 20.7 | 19.7 | 47.7  | 1.6328 | 3.9 |
| 4/17/2018 10:40 | 0.7 | 1    | 2.8 | 20.8 | 19.6 | 47.2  | 1.6077 | 4   |
| 4/17/2018 10:41 | 0.6 | 1.3  | 2.9 | 20.8 | 19.5 | 47.1  | 1.614  | 4   |
| 4/17/2018 10:42 | 0.6 | 1.2  | 3   | 20.7 | 18.6 | 46.7  | 1.513  | 4   |
| 4/17/2018 10:43 | 0.6 | 0.7  | 2.4 | 20.6 | 18.5 | 46.3  | 1.5145 | 4.1 |
| 4/17/2018 10:44 | 0.7 | 0.9  | 3.4 | 20.7 | 18.7 | 45.6  | 1.5645 | 4.2 |
| 4/17/2018 10:45 | 0.6 | 0.8  | 1.4 | 20.6 | 18.3 | 45.2  | 1.4832 | 4.3 |
| 4/17/2018 10:46 | 0.6 | 0.9  | 1.8 | 20.7 | 18.9 | 45.2  | 1.5808 | 4.3 |
| 4/17/2018 10:47 | 0.5 | 0.8  | 2   | 20.4 | 18.5 | 44.8  | 1.5083 | 4.4 |
| 4/17/2018 10:48 | 0.6 | 0.9  | 2.2 | 20.3 | 17.6 | 44.1  | 1.4232 | 4.3 |
| 4/17/2018 10:49 | 0.8 | 1    | 2.1 | 20.4 | 17.3 | 43.2  | 1.4122 | 4.3 |
| 4/17/2018 10:50 | 0.8 | 1    | 2.4 | 20.6 | 17.4 | 42.4  | 1.4178 | 4.4 |
| 4/17/2018 10:51 | 0.7 | 1.2  | 2.4 | 20.4 | 18   | 41.9  | 1.43   | 4.4 |
| 4/17/2018 10:52 | 0.9 | 2.1  | 2.4 | 21.1 | 17.1 | 37.8  | 1.2938 | 4.4 |
| 4/17/2018 10:53 | 1.5 | 4.3  | 3.2 | 22.6 | 15.5 | 28.9  | 1.0706 | 4.6 |
| 4/17/2018 10:54 | 3   | 6    | 1.1 | 23.6 | 12.8 | 16.5  | 0.7905 | 4.6 |
| 4/17/2018 10:55 | 4.5 | 6.3  | 3   | 23.8 | 12.3 | 14.5  | 0.7128 | 4.7 |
| 4/17/2018 10:56 | 5.7 | 7.2  | 3.8 | 24.3 | 11.9 | 13.1  | 0.6562 | 4.7 |
| 4/17/2018 10:57 | 6.2 | 6.7  | 4   | 24.6 | 11.6 | 12.7  | 0.604  | 4.8 |
| 4/17/2018 10:58 | 6.7 | 7.7  | 4.3 | 25.1 | 11.5 | 12.3  | 0.5802 | 4.8 |
| 4/17/2018 10:59 | 7.1 | 8.4  | 5.1 | 25.5 | 11.1 | 11.8  | 0.5462 | 4.8 |
| 4/17/2018 11:00 | 7.5 | 7.7  | 3.1 | 25.3 | 11   | 11.1  | 0.5285 | 5   |
| 4/17/2018 11:01 | 7.4 | 8.3  | 3.9 | 25.4 | 11.4 | 10.6  | 0.5577 | 5   |
| 4/17/2018 11:02 | 7.5 | 7.7  | 3.6 | 25.3 | 11   | 9.9   | 0.5121 | 4.9 |
| 4/17/2018 11:03 | 7.6 | 8.2  | 4   | 25.9 | 11.2 | 9.2   | 0.5141 | 4.8 |
| 4/17/2018 11:04 | 8.1 | 8.5  | 4.9 | 26.5 | 10.7 | 8.4   | 0.4804 | 5   |
| 4/17/2018 11:05 | 8.6 | 9.6  | 6.2 | 26.9 | 10.3 | 7.8   | 0.444  | 5.1 |
| 4/17/2018 11:06 | 8.7 | 7.9  | 3.6 | 24.8 | 11.1 | 7.3   | 0.4767 | 5.3 |
| 4/17/2018 11:07 | 7.5 | 4.6  | 1.5 | 22.5 | 15.3 | 7     | 0.5932 | 5.3 |
| 4/17/2018 11:08 | 5.9 | 5.1  | 3   | 22.6 | 15.7 | 6.8   | 0.5833 | 5.4 |
| 4/17/2018 11:09 | 3.9 | 1.3  | 3.6 | 23.9 | 42.6 | 55.1  | 0.768  | 5.2 |
| 4/17/2018 11:10 | 2.4 | 0.9  | 4.4 | 26.5 | 56.8 | 124.7 | 1.1052 | 5.1 |
| 4/17/2018 11:11 | 1   | 1.3  | 5.2 | 29.1 | 70.1 | 172.8 | 1.2757 | 5.1 |
| 4/17/2018 11:12 | 0.2 | 1.2  | 5.3 | 33.1 | 83   | 206.4 | 1.6257 | 5.1 |

|                 |     |     |      |      |       |       |        |     |
|-----------------|-----|-----|------|------|-------|-------|--------|-----|
| 4/17/2018 11:13 | 0.2 | 1.5 | 5.9  | 43.4 | 94    | 221.9 | 2.1972 | 5.1 |
| 4/17/2018 11:14 | 0.2 | 1.1 | 6.2  | 47.9 | 96.3  | 232.2 | 2.5788 | 4.8 |
| 4/17/2018 11:15 | 0.3 | 1.9 | 6.8  | 58.5 | 105.5 | 229.1 | 3.2883 | 4.9 |
| 4/17/2018 11:16 | 0.3 | 1.6 | 9.1  | 66.5 | 112.5 | 246.1 | 3.8663 | 5.1 |
| 4/17/2018 11:17 | 0.3 | 1.7 | 9.7  | 70.1 | 111.5 | 244.1 | 4.3005 | 5.2 |
| 4/17/2018 11:18 | 0.2 | 2.4 | 9.3  | 70.8 | 111.4 | 240   | 4.6283 | 5.3 |
| 4/17/2018 11:19 | 0.2 | 2.2 | 7.8  | 67   | 103.5 | 231.4 | 4.6987 | 5.4 |
| 4/17/2018 11:20 | 0.3 | 1.8 | 7.8  | 69.3 | 103.5 | 223.3 | 4.9728 | 5.4 |
| 4/17/2018 11:21 | 0.3 | 1.6 | 9    | 73.6 | 105.5 | 220.1 | 5.4102 | 5.4 |
| 4/17/2018 11:22 | 0.3 | 1.9 | 8.7  | 73.8 | 101.9 | 229.5 | 5.5845 | 5.5 |
| 4/17/2018 11:23 | 0.3 | 2   | 9    | 75.7 | 101.2 | 225.9 | 5.8655 | 5.6 |
| 4/17/2018 11:24 | 0.3 | 2.1 | 10.5 | 81.4 | 99.9  | 220.2 | 6.4305 | 5.7 |
| 4/17/2018 11:25 | 0.3 | 1.7 | 10   | 79.1 | 94    | 217.3 | 6.414  | 5.7 |
| 4/17/2018 11:26 | 0.3 | 1.9 | 10.1 | 79.5 | 94.2  | 216.4 | 6.6648 | 5.9 |
| 4/17/2018 11:27 | 0.3 | 1.7 | 11.5 | 82.8 | 92.7  | 216.4 | 6.9843 | 5.9 |
| 4/17/2018 11:28 | 0.3 | 1.3 | 10   | 82.6 | 92    | 225.4 | 7.3423 | 6   |
| 4/17/2018 11:29 | 0.2 | 1.7 | 9.7  | 84.3 | 92.8  | 222.4 | 7.6639 | 6   |
| 4/17/2018 11:30 | 0.2 | 1.3 | 9.4  | 75.2 | 85.6  | 214.5 | 7.2447 | 6.2 |
| 4/17/2018 11:31 | 0.2 | 1.6 | 8.6  | 72   | 82.8  | 204.7 | 6.8953 | 6.1 |
| 4/17/2018 11:32 | 0.3 | 1.8 | 9.8  | 74.1 | 81.7  | 203.4 | 7.3578 | 6.2 |
| 4/17/2018 11:33 | 0.2 | 1.7 | 8.9  | 74.1 | 81.4  | 214.1 | 7.7595 | 6.3 |
| 4/17/2018 11:34 | 0.2 | 2   | 8.8  | 70.6 | 80.1  | 204.9 | 7.7    | 6.2 |
| 4/17/2018 11:35 | 0.2 | 1   | 9.2  | 69.7 | 77.4  | 200.5 | 7.4899 | 5.9 |
| 4/17/2018 11:36 | 0.2 | 1.1 | 8.3  | 67.9 | 79.4  | 199.9 | 7.7248 | 5.7 |
| 4/17/2018 11:37 | 0.1 | 1.3 | 8.1  | 68   | 79.5  | 189.3 | 7.8541 | 5.4 |
| 4/17/2018 11:38 | 0.2 | 0.9 | 8.9  | 65   | 77.1  | 198.1 | 7.8978 | 5.8 |
| 4/17/2018 11:39 | 0.2 | 1.4 | 8.6  | 68.6 | 75.7  | 198   | 8.2605 | 5.8 |
| 4/17/2018 11:40 | 0.2 | 1.5 | 8    | 58.4 | 67.8  | 187.8 | 7.5761 | 5.9 |
| 4/17/2018 11:41 | 0.2 | 2   | 5.9  | 57.8 | 69.6  | 176.5 | 7.568  | 6   |
| 4/17/2018 11:42 | 0.2 | 1.8 | 9.2  | 61.6 | 71.2  | 187.9 | 8.1764 | 6.2 |
| 4/17/2018 11:43 | 0.1 | 1.4 | 6.6  | 61.7 | 70.5  | 186   | 8.309  | 6.3 |
| 4/17/2018 11:44 | 0.1 | 1.3 | 7.5  | 54.9 | 67.8  | 179.2 | 7.9843 | 6.3 |
| 4/17/2018 11:45 | 0.1 | 1.7 | 7.9  | 53.6 | 62.7  | 167.1 | 7.6228 | 6.2 |
| 4/17/2018 11:46 | 0.2 | 1.5 | 6.8  | 55.2 | 63.6  | 178.1 | 7.9362 | 6.3 |
| 4/17/2018 11:47 | 0.2 | 1   | 6.8  | 54.2 | 64.2  | 181.4 | 8.1435 | 6.3 |
| 4/17/2018 11:48 | 0.1 | 1.3 | 6.6  | 50.4 | 58.8  | 164.9 | 7.4996 | 6.3 |
| 4/17/2018 11:49 | 0.1 | 1.4 | 7.9  | 50.6 | 59    | 166.8 | 7.7375 | 6.3 |
| 4/17/2018 11:50 | 0.1 | 1.5 | 6.4  | 48.7 | 57.4  | 163.7 | 7.6392 | 6.2 |
| 4/17/2018 11:51 | 0.1 | 1   | 8    | 49.6 | 57.2  | 168.4 | 8.0645 | 6.1 |
| 4/17/2018 11:52 | 0.1 | 1.4 | 6.6  | 49.5 | 58.2  | 170.4 | 8.042  | 6.1 |
| 4/17/2018 11:53 | 0.1 | 1.3 | 6.6  | 45.9 | 55.3  | 162.1 | 7.7158 | 6   |
| 4/17/2018 11:54 | 0.2 | 0.9 | 7.1  | 47.4 | 56.4  | 162.1 | 8.1346 | 6   |
| 4/17/2018 11:55 | 0.2 | 1.4 | 5.4  | 44.9 | 53.4  | 157.6 | 7.6276 | 6   |
| 4/17/2018 11:56 | 0.1 | 1.2 | 6.6  | 46.3 | 53    | 155.4 | 7.9112 | 6   |
| 4/17/2018 11:57 | 0.1 | 0.8 | 5.8  | 45   | 54.2  | 162   | 8.1144 | 6.1 |
| 4/17/2018 11:58 | 0.1 | 1.6 | 5.6  | 44.4 | 53.3  | 153.6 | 8.1602 | 6.1 |
| 4/17/2018 11:59 | 0.1 | 2   | 5.7  | 44.4 | 52.6  | 159.2 | 8.0926 | 6.2 |

|                 |     |     |     |      |      |       |        |     |
|-----------------|-----|-----|-----|------|------|-------|--------|-----|
| 4/17/2018 12:00 | 0.1 | 1.4 | 5.9 | 45.7 | 53.6 | 161.3 | 8.4008 | 6.3 |
| 4/17/2018 12:01 | 0.1 | 1.2 | 6.2 | 41.3 | 51.5 | 154.6 | 7.9753 | 6.1 |
| 4/17/2018 12:02 | 0.2 | 1.1 | 6.8 | 43   | 48.4 | 143.9 | 7.7135 | 6   |
| 4/17/2018 12:03 | 0.2 | 1.4 | 4.8 | 40.9 | 50   | 151.8 | 8.053  | 6.1 |
| 4/17/2018 12:04 | 0.2 | 0.9 | 5.1 | 40.7 | 48.4 | 149.3 | 7.89   | 6.1 |
| 4/17/2018 12:05 | 0.2 | 1.2 | 3.5 | 39.3 | 46.1 | 144.2 | 7.504  | 6   |
| 4/17/2018 12:06 | 0.2 | 1   | 5   | 39.4 | 45.7 | 143.9 | 7.6505 | 5.8 |
| 4/17/2018 12:07 | 0.2 | 0.8 | 5.7 | 38.9 | 45.2 | 143.4 | 7.6443 | 5.7 |
| 4/17/2018 12:08 | 0.3 | 1   | 6.3 | 36.8 | 43.7 | 137   | 7.2958 | 5.8 |
| 4/17/2018 12:09 | 0.3 | 1.1 | 5.7 | 37.7 | 43   | 136   | 7.3348 | 5.9 |
| 4/17/2018 12:10 | 0.3 | 0.8 | 4.6 | 37.1 | 42.2 | 132.9 | 7.3027 | 5.7 |
| 4/17/2018 12:11 | 0.3 | 1   | 4.4 | 36.3 | 41.9 | 134.2 | 7.3008 | 5.2 |
| 4/17/2018 12:12 | 0.3 | 0.7 | 4.8 | 37.6 | 41.7 | 137   | 7.4416 | 5.4 |
| 4/17/2018 12:13 | 0.3 | 0.8 | 5.3 | 34.9 | 40.9 | 131.7 | 7.2119 | 4.7 |
| 4/17/2018 12:14 | 0.3 | 0.8 | 4.5 | 36.8 | 41   | 130   | 7.4415 | 3.7 |
| 4/17/2018 12:15 | 0.3 | 0.9 | 5   | 34.8 | 40.7 | 132.2 | 7.3888 | 3.7 |
| 4/17/2018 12:16 | 0.3 | 0.9 | 4.3 | 32.6 | 37.7 | 119.7 | 6.7222 | 3.8 |
| 4/17/2018 12:17 | 0.4 | 0.8 | 3   | 33.6 | 37.8 | 118.5 | 6.9589 | 4   |
| 4/17/2018 12:18 | 0.4 | 1.1 | 5.2 | 35.3 | 38.3 | 125.4 | 7.2227 | 4.1 |
| 4/17/2018 12:19 | 0.4 | 0.7 | 4.9 | 33.7 | 38.3 | 124.6 | 7.1375 | 4.2 |
| 4/17/2018 12:20 | 0.4 | 1   | 4.2 | 31.7 | 35.8 | 114.4 | 6.5664 | 4.1 |
| 4/17/2018 12:21 | 0.4 | 0.8 | 3.5 | 31.7 | 34.7 | 109.3 | 6.5126 | 4   |
| 4/17/2018 12:22 | 0.4 | 0.9 | 3.8 | 31.9 | 35.3 | 113.9 | 6.6578 | 4.2 |
| 4/17/2018 12:23 | 0.4 | 0.9 | 4   | 33.5 | 35.3 | 114.3 | 6.8533 | 4.1 |
| 4/17/2018 12:24 | 0.4 | 1.2 | 4.1 | 30.8 | 34.7 | 115.3 | 6.6098 | 4.2 |
| 4/17/2018 12:25 | 0.4 | 1.2 | 4.7 | 31.6 | 33.9 | 109.6 | 6.5943 | 4.1 |
| 4/17/2018 12:26 | 0.4 | 1.1 | 4.4 | 32.2 | 34.5 | 114   | 6.8133 | 4.1 |
| 4/17/2018 12:27 | 0.4 | 1.4 | 3   | 30.1 | 32.8 | 105.7 | 6.2849 | 4   |
| 4/17/2018 12:28 | 0.3 | 1.1 | 4.8 | 30.8 | 32.5 | 109.6 | 6.4459 | 4.1 |
| 4/17/2018 12:29 | 0.3 | 0.3 | 4.9 | 30.5 | 32.4 | 110.8 | 6.4627 | 4.2 |
| 4/17/2018 12:30 | 0.3 | 0.8 | 2.4 | 29.2 | 31.4 | 104.2 | 6.2095 | 4.1 |
| 4/17/2018 12:31 | 0.3 | 1.1 | 3.8 | 28.7 | 31   | 101.9 | 6.1748 | 4.2 |
| 4/17/2018 12:32 | 0.3 | 1.2 | 1.6 | 28.5 | 30.2 | 100.3 | 5.9991 | 4.2 |
| 4/17/2018 12:33 | 0.3 | 1.2 | 3.6 | 28.1 | 29.4 | 96.6  | 5.8441 | 4.2 |
| 4/17/2018 12:34 | 0.3 | 0.9 | 3.4 | 29.6 | 30.1 | 104.2 | 6.1436 | 4.2 |
| 4/17/2018 12:35 | 0.3 | 1.2 |     | 29.2 | 30.2 | 103.6 | 6.2433 | 4.3 |
| 4/17/2018 12:36 | 0.3 | 1.4 |     | 27.2 | 27.9 | 94.4  | 5.4743 | 4.2 |
| 4/17/2018 12:37 | 0.4 | 1.9 |     | 22.3 | 28.1 | 88.2  | 4.4741 | 4.1 |
| 4/17/2018 12:38 | 0.8 | 3   |     | 20.6 | 28   | 37.6  | 2.6284 | 4   |
| 4/17/2018 12:39 | 1.3 | 3.1 |     | 21   | 23.4 | 28.9  | 2.3849 | 4   |
| 4/17/2018 12:40 | 1.7 | 2.2 |     | 20.8 | 18   | 28.8  | 2.3715 | 4.1 |
| 4/17/2018 12:41 | 1.8 | 3.5 |     | 20.9 | 17.4 | 23.1  | 2.1159 | 4   |
| 4/17/2018 12:42 | 1.9 | 3.1 |     | 21   | 17.4 | 22.2  | 2.0857 | 4   |
| 4/17/2018 12:43 | 2   | 2.7 |     | 21   | 17.1 | 22.2  | 2.0502 | 4   |
| 4/17/2018 12:44 | 2.1 | 3.8 |     | 20.9 | 16.4 | 22    | 1.9085 | 4   |
| 4/17/2018 12:45 | 2.2 | 3.6 |     | 21   | 15.8 | 21.5  | 1.7932 | 4.1 |
| 4/17/2018 12:46 | 2.3 | 4.2 |     | 21   | 15.5 | 20.9  | 1.7103 | 4.1 |

|                 |     |      |     |      |      |      |        |     |
|-----------------|-----|------|-----|------|------|------|--------|-----|
| 4/17/2018 12:47 | 2.6 | 4.4  | 9.1 | 21.2 | 15.1 | 20.1 | 1.6013 | 4.2 |
| 4/17/2018 12:48 | 2.8 | 3.7  | 2.4 | 21.4 | 14.9 | 19.3 | 1.5463 | 4.1 |
| 4/17/2018 12:49 | 3   | 4.3  | 1.3 | 21.6 | 15.1 | 18.5 | 1.6071 | 4.1 |
| 4/17/2018 12:50 | 3   | 4.5  | 2.1 | 21.6 | 14.6 | 17.6 | 1.4863 | 4   |
| 4/17/2018 12:51 | 3.1 | 4.5  | 2.8 | 21.8 | 14.2 | 16.4 | 1.4613 | 4   |
| 4/17/2018 12:52 | 3.2 | 4.5  | 2.4 | 21.7 | 14.6 | 15.5 | 1.4843 | 4.1 |
| 4/17/2018 12:53 | 3.3 | 5.4  | 1.2 | 21.8 | 13.9 | 14.7 | 1.3068 | 4.1 |
| 4/17/2018 12:54 | 3.5 | 5.7  | 1.9 | 22.3 | 13.2 | 13.8 | 1.2378 | 4.1 |
| 4/17/2018 12:55 | 3.8 | 5.4  | 2.4 | 22.4 | 13.1 | 13.1 | 1.2268 | 4.2 |
| 4/17/2018 12:56 | 3.9 | 4.9  | 3.3 | 22.2 | 13.7 | 12.5 | 1.283  | 4.2 |
| 4/17/2018 12:57 | 3.9 | 5.2  | 2.9 | 22.1 | 13.6 | 12   | 1.2514 | 4.2 |
| 4/17/2018 12:58 | 3.7 | 4.4  | 2.6 | 21.9 | 14.4 | 11.3 | 1.2317 | 4.1 |
| 4/17/2018 12:59 | 3.8 | 5.5  | 3.1 | 22.5 | 14.2 | 10.8 | 1.1534 | 4.3 |
| 4/17/2018 13:00 | 3.9 | 5.1  | 1.7 | 22.8 | 13   | 10.3 | 1.1008 | 4.3 |
| 4/17/2018 13:01 | 4.1 | 5.6  | 2.8 | 22.8 | 12.9 | 9.8  | 1.1139 | 4.4 |
| 4/17/2018 13:02 | 4.4 | 6.4  | 1.7 | 22.7 | 12   | 9.4  | 1.0215 | 4.4 |
| 4/17/2018 13:03 | 4.6 | 6.3  | 1.5 | 22.8 | 12.1 | 9    | 0.9513 | 4.5 |
| 4/17/2018 13:04 | 4.8 | 5.8  | 1.8 | 23   | 12   | 8.5  | 0.928  | 4.4 |
| 4/17/2018 13:05 | 5   | 6.6  | 1.2 | 23.8 | 11.6 | 8    | 0.926  | 4.5 |
| 4/17/2018 13:06 | 5.1 | 5.8  | 3.3 | 23.2 | 11.9 | 7.4  | 0.9109 | 4.6 |
| 4/17/2018 13:07 | 5.3 | 7.2  | 2.8 | 23.7 | 11.2 | 7    | 0.8583 | 4.6 |
| 4/17/2018 13:08 | 5.6 | 7.8  | 3.8 | 24.3 | 10.8 | 6.6  | 0.8316 | 4.7 |
| 4/17/2018 13:09 | 5.9 | 8    | 2.1 | 24.2 | 10.6 | 6.1  | 0.7554 | 4.6 |
| 4/17/2018 13:10 | 5.9 | 6.8  | 1.3 | 23.8 | 10.7 | 5.6  | 0.784  | 4.6 |
| 4/17/2018 13:11 | 6.2 | 8.5  | 2.7 | 24.8 | 9.6  | 5.2  | 0.661  | 4.4 |
| 4/17/2018 13:12 | 6.6 | 8.9  | 3.3 | 25.3 | 9.2  | 4.9  | 0.6381 | 4.4 |
| 4/17/2018 13:13 | 7   | 9    | 1   | 24.8 | 9.4  | 4.5  | 0.6511 | 4.5 |
| 4/17/2018 13:14 | 6.9 | 7.5  | 1.9 | 24.7 | 10.2 | 4.2  | 0.6591 | 4.6 |
| 4/17/2018 13:15 | 6.7 | 8.2  | 3.7 | 24.9 | 9.7  | 3.8  | 0.6316 | 4.6 |
| 4/17/2018 13:16 | 6.6 | 8.3  | 2.7 | 24.7 | 9.1  | 3.5  | 0.5841 | 4.7 |
| 4/17/2018 13:17 | 6.8 | 8.1  | 2.6 | 24.8 | 8.9  | 3.3  | 0.5743 | 4.7 |
| 4/17/2018 13:18 | 7   | 7.9  | 2.6 | 24.9 | 8.4  | 3.1  | 0.5354 | 4.7 |
| 4/17/2018 13:19 | 7.1 | 8.8  | 2.8 | 25.3 | 8.5  | 2.9  | 0.5289 | 4.7 |
| 4/17/2018 13:20 | 7.4 | 9.3  | 3.4 | 25.5 | 7.9  | 2.8  | 0.495  | 4.8 |
| 4/17/2018 13:21 | 7.7 | 10   | 2.9 | 26.2 | 7.5  | 2.7  | 0.4884 | 4.8 |
| 4/17/2018 13:22 | 8.3 | 9.3  | 2.7 | 26.3 | 6.9  | 2.6  | 0.4474 | 4.7 |
| 4/17/2018 13:23 | 8.4 | 9.2  | 3   | 26.2 | 7.3  | 2.5  | 0.4532 | 4.8 |
| 4/17/2018 13:24 | 8.6 | 10.9 | 4.1 | 26.8 | 6.9  | 2.4  | 0.4353 | 4.8 |
| 4/17/2018 13:25 | 8.8 | 10.4 | 3.4 | 27   | 6.4  | 2.3  | 0.4215 | 4.9 |
| 4/17/2018 13:26 | 9.3 | 10.7 | 4   | 27   | 6    | 2.3  | 0.3938 | 4.9 |
| 4/17/2018 13:27 | 9.4 | 9.1  | 3.3 | 26.4 | 6.5  | 2.2  | 0.3999 | 5   |
| 4/17/2018 13:28 | 9.3 | 9.7  | 2.6 | 26.4 | 6.4  | 2.2  | 0.3794 | 5   |
| 4/17/2018 13:29 | 9   | 10.4 | 2.1 | 26.3 | 6.2  | 2.1  | 0.3679 | 5   |
| 4/17/2018 13:30 | 9   | 10.3 | 3.4 | 26.6 | 6    | 2    | 0.3492 | 5   |
| 4/17/2018 13:31 | 9.1 | 10.8 | 2.7 | 26.7 | 5.8  | 2    | 0.3586 | 5.1 |
| 4/17/2018 13:32 | 9.2 | 11.1 | 3.6 | 26.9 | 5.7  | 1.9  | 0.332  | 5.2 |
| 4/17/2018 13:33 | 9.4 | 11.7 | 4.5 | 27.2 | 5.5  | 1.8  | 0.3129 | 5.2 |



|                 |     |      |     |      |      |      |        |     |
|-----------------|-----|------|-----|------|------|------|--------|-----|
| 4/17/2018 13:34 | 9.7 | 10.4 | 2.3 | 27.3 | 5.2  | 1.8  | 0.3244 | 5.1 |
| 4/17/2018 13:35 | 9.6 | 10.6 | 3.7 | 26.4 | 5.5  | 1.7  | 0.3182 | 5.3 |
| 4/17/2018 13:36 | 9.3 | 8.9  | 5.7 | 28.8 | 5.5  | 1.7  | 0.322  | 5.2 |
| 4/17/2018 13:37 | 9.2 | 11   | 7.5 | 24.9 | 5.6  | 1.7  | 0.3299 | 5.2 |
| 4/17/2018 13:38 | 9.7 | 11.4 | 8.8 | 26   | 5.7  | 1.7  | 0.3236 | 5   |
| 4/17/2018 13:39 | 10  | 10.6 | 6.7 | 26.8 | 5.7  | 1.7  | 0.339  | 4.9 |
| 4/17/2018 13:40 | 10  | 10.2 | 7.1 | 26.7 | 5.7  | 1.7  | 0.3313 | 5   |
| 4/17/2018 13:41 | 9.7 | 9.7  | 6.6 | 26.9 | 5.6  | 1.7  | 0.3444 | 5   |
| 4/17/2018 13:42 | 9.3 | 9.4  | 7   | 26.5 | 5.7  | 1.8  | 0.3327 | 5   |
| 4/17/2018 13:43 | 9   | 9.6  | 6.9 | 26.4 | 5.7  | 1.8  | 0.3481 | 5.1 |
| 4/17/2018 13:44 | 8.6 | 8.4  | 6.9 | 26   | 5.7  | 1.9  | 0.3481 | 5.3 |
| 4/17/2018 13:45 | 8.2 | 8.3  | 6.3 | 25.7 | 5.7  | 1.9  | 0.341  | 5.3 |
| 4/17/2018 13:46 | 7.9 | 8.6  | 6.3 | 25.3 | 5.7  | 1.9  | 0.3618 | 5.3 |
| 4/17/2018 13:47 | 7.6 | 7.9  | 6.5 | 25.1 | 5.7  | 2    | 0.3418 | 5.3 |
| 4/17/2018 13:48 | 7.4 | 7.7  | 4.8 | 25.2 | 5.7  | 2    | 0.3543 | 5.2 |
| 4/17/2018 13:49 | 7.1 | 7.3  | 6.7 | 24.7 | 5.7  | 2.1  | 0.3509 | 5.1 |
| 4/17/2018 13:50 | 6.4 | 3.8  | 4.8 | 23.6 | 11.1 | 14.7 | 0.4111 | 5.3 |
| 4/17/2018 13:51 | 5   | 1.7  | 3.9 | 22.1 | 18.3 | 37.4 | 0.4515 | 5.4 |
| 4/17/2018 13:52 | 3   | 1.5  | 3.9 | 22   | 24.8 | 57.5 | 0.6063 | 5.4 |
| 4/17/2018 13:53 | 1.4 | 1.1  | 5.3 | 22.6 | 30.4 | 76.4 | 0.9878 | 5.4 |
| 4/17/2018 13:54 | 0.6 | 0.6  | 6.1 | 23.3 | 32   | 79.4 | 1.28   | 5.4 |
| 4/17/2018 13:55 | 0.4 | 0.4  | 4.4 | 24.2 | 32.6 | 82.5 | 1.736  | 5.3 |
| 4/17/2018 13:56 | 0.3 | 0.6  | 5.9 | 24.6 | 32.8 | 84.4 | 1.963  | 5.3 |
| 4/17/2018 13:57 | 0.3 | 1    | 5.2 | 25.4 | 31.9 | 83.9 | 2.2465 | 5.2 |
| 4/17/2018 13:58 | 0.3 | 1.2  | 5.4 | 24.7 | 31.5 | 83.6 | 2.3745 | 5.4 |
| 4/17/2018 13:59 | 0.3 | 0.1  | 4.4 | 24.4 | 30.5 | 78   | 2.4212 | 5.5 |
| 4/17/2018 14:00 | 0.3 | 0.4  | 3.3 | 24   | 30.6 | 78.4 | 2.5217 | 5.4 |
| 4/17/2018 14:01 | 0.3 | 0.6  | 5.1 | 24.1 | 29   | 72   | 2.3283 | 5.5 |
| 4/17/2018 14:02 | 0.4 | 0.8  | 4.9 | 24   | 29.2 | 77.4 | 2.4773 | 5.3 |
| 4/17/2018 14:03 | 0.4 | 1.2  | 4   | 24   | 29   | 75.9 | 2.4563 | 5.3 |
| 4/17/2018 14:04 | 0.3 | 0.9  | 3.9 | 23.8 | 28.6 | 74.5 | 2.4605 | 5.3 |
| 4/17/2018 14:05 | 0.3 | 0.6  | 5.7 | 23.1 | 27.2 | 72   | 2.2925 | 5.2 |
| 4/17/2018 14:06 | 0.4 | 0.8  | 4.7 | 23.4 | 26.4 | 67.5 | 2.2865 | 5.1 |
| 4/17/2018 14:07 | 0.4 | 0.9  | 4.5 | 22.9 | 26.9 | 67.4 | 2.3545 | 5.2 |
| 4/17/2018 14:08 | 0.4 | 1.3  | 4.3 | 23.1 | 26   | 66.2 | 2.2843 | 5.2 |
| 4/17/2018 14:09 | 0.4 | 0.6  | 3.9 | 22.8 | 25.7 | 64.1 | 2.2863 | 5.2 |
| 4/17/2018 14:10 | 0.4 | 1.3  | 5.6 | 22.8 | 25.1 | 63.9 | 2.1987 | 5   |
| 4/17/2018 14:11 | 0.4 | 1.1  | 5.6 | 22.7 | 24.9 | 63.8 | 2.1817 | 5.2 |
| 4/17/2018 14:12 | 0.5 | 1    | 3.6 | 22.6 | 24.4 | 63.3 | 2.1278 | 5.3 |
| 4/17/2018 14:13 | 0.4 | 0.3  | 4.5 | 22.7 | 25   | 63.2 | 2.2333 | 5.4 |
| 4/17/2018 14:14 | 0.4 | 0.7  | 6   | 22.4 | 24.9 | 63.2 | 2.2415 | 4.9 |
| 4/17/2018 14:15 | 0.3 | 0.7  | 4   | 22.4 | 24.3 | 62.9 | 2.2007 | 4.9 |
| 4/17/2018 14:16 | 0.3 | 0.4  | 4.6 | 22.4 | 24.1 | 62.6 | 2.166  | 5   |
| 4/17/2018 14:17 | 0.3 | 1.2  | 4.7 | 22.3 | 23.9 | 62.1 | 2.1632 | 5.2 |
| 4/17/2018 14:18 | 0.4 | 1    | 6   | 22.3 | 22.9 | 61.3 | 2.0505 | 5.2 |
| 4/17/2018 14:19 | 0.4 | 0.3  | 5.6 | 22.1 | 23   | 60.9 | 2.0728 | 5.2 |
| 4/17/2018 14:20 | 0.5 | 0.9  | 4   | 22   | 22.5 | 60.1 | 2.0193 | 5.4 |

|                 |     |     |     |      |      |      |        |     |
|-----------------|-----|-----|-----|------|------|------|--------|-----|
| 4/17/2018 14:21 | 0.5 | 0.2 | 4.5 | 22.2 | 22.4 | 59.5 | 2.0355 | 5.3 |
| 4/17/2018 14:22 | 0.6 | 1.2 | 4.9 | 21.9 | 22.2 | 58.6 | 2.0035 | 5.3 |
| 4/17/2018 14:23 | 0.6 | 0.9 | 2.8 | 21.9 | 21.6 | 54.4 | 1.9043 | 5.3 |
| 4/17/2018 14:24 | 0.6 | 1.2 | 3.7 | 21.9 | 21.7 | 54.6 | 1.9765 | 5.1 |
| 4/17/2018 14:25 | 0.6 | 1   | 5.1 | 21.9 | 21   | 50.6 | 1.8663 | 5.3 |
| 4/17/2018 14:26 | 0.6 | 0.3 | 3.6 | 22.1 | 21.4 | 52.4 | 1.9472 | 5.3 |
| 4/17/2018 14:27 | 0.5 | 1.1 | 4.4 | 21.7 | 21.5 | 54.9 | 1.9755 | 5.1 |
| 4/17/2018 14:28 | 0.4 | 0.4 | 3.1 | 21.6 | 21.4 | 54.8 | 1.9698 | 4.5 |
| 4/17/2018 14:29 | 0.4 | 0.8 | 4.1 | 21.5 | 20.3 | 54.2 | 1.816  | 4.6 |
| 4/17/2018 14:30 | 0.5 | 1   | 4.1 | 21.4 | 20   | 53.3 | 1.8138 | 4.7 |
| 4/17/2018 14:31 | 0.6 | 0.9 | 3.8 | 21.5 | 19.9 | 52.5 | 1.809  | 4.8 |
| 4/17/2018 14:32 | 0.6 | 0.5 | 5.4 | 21.6 | 19.8 | 51.7 | 1.788  | 4.8 |
| 4/17/2018 14:33 | 0.6 | 0.7 | 3.1 | 21.7 | 19.1 | 50.8 | 1.7103 | 4.6 |
| 4/17/2018 14:34 | 0.6 | 0.8 | 4.6 | 21.6 | 19.4 | 50   | 1.7568 | 4.5 |
| 4/17/2018 14:35 | 0.6 | 1.1 | 3.2 | 21.7 | 18.9 | 46.5 | 1.7315 | 4.4 |
| 4/17/2018 14:36 | 0.6 | 1.1 | 3.1 | 21.3 | 18.6 | 45.3 | 1.6813 | 4.3 |
| 4/17/2018 14:37 | 0.6 | 1.2 | 3.1 | 21.1 | 18.8 | 44.5 | 1.696  | 4.2 |
| 4/17/2018 14:38 | 0.6 | 0.6 | 4.4 | 21.4 | 18.6 | 46.3 | 1.671  | 4.2 |
| 4/17/2018 14:39 | 0.6 | 0.9 | 3.9 | 21.2 | 18.6 | 45.9 | 1.6815 | 4.3 |
| 4/17/2018 14:40 | 0.5 | 1.3 | 4.3 | 21.2 | 18.7 | 45.6 | 1.6947 | 4.4 |
| 4/17/2018 14:41 | 0.5 | 1.1 | 3.5 | 21.4 | 18.6 | 45.2 | 1.6712 | 4.5 |
| 4/17/2018 14:42 | 0.5 | 1.1 | 5.2 | 21.1 | 17.8 | 44.6 | 1.6132 | 4.5 |
| 4/17/2018 14:43 | 0.6 | 1.6 | 4.2 | 20.9 | 17   | 43.7 | 1.5062 | 4.5 |
| 4/17/2018 14:44 | 0.7 | 0.9 | 3.6 | 21.3 | 17.4 | 43   | 1.5917 | 4.6 |
| 4/17/2018 14:45 | 0.7 | 0.6 | 2.8 | 21.2 | 17.4 | 42.3 | 1.6007 | 4.6 |
| 4/17/2018 14:46 | 0.7 | 1   | 2.7 | 21.2 | 17.2 | 41.6 | 1.5367 | 4.5 |
| 4/17/2018 14:47 | 0.7 | 1.1 | 3.4 | 21   | 17.2 | 41   | 1.5568 | 4.4 |
| 4/17/2018 14:48 | 0.7 | 0.9 | 4.3 | 21.1 | 17   | 40.5 | 1.5727 | 4.5 |
| 4/17/2018 14:49 | 0.7 | 1.3 | 3.9 | 20.9 | 16.7 | 39.9 | 1.4975 | 4.4 |
| 4/17/2018 14:50 | 0.8 | 0.8 | 4.4 | 21   | 16.3 | 39.4 | 1.4907 | 4.3 |
| 4/17/2018 14:51 | 0.8 | 1.3 | 4.2 | 20.7 | 16.4 | 39.1 | 1.4623 | 4.3 |
| 4/17/2018 14:52 | 0.8 | 1.1 | 3.2 | 20.9 | 16.1 | 38.9 | 1.4448 | 4.4 |
| 4/17/2018 14:53 | 0.8 | 1.2 | 3.3 | 20.8 | 16.1 | 38.5 | 1.455  | 4.5 |
| 4/17/2018 14:54 | 0.8 | 0.8 | 2.2 | 21.1 | 16.1 | 38   | 1.4658 | 4.6 |
| 4/17/2018 14:55 | 0.8 | 0.9 | 3.3 | 20.7 | 15.9 | 37.4 | 1.4322 | 4.4 |
| 4/17/2018 14:56 | 0.8 | 1.2 | 3.3 | 20.6 | 15.9 | 37   | 1.4247 | 4.3 |
| 4/17/2018 14:57 | 0.8 | 1.7 | 4.7 | 20.7 | 15.6 | 36.3 | 1.396  | 4.2 |
| 4/17/2018 14:58 | 0.8 | 1   | 4.4 | 20.6 | 15.6 | 36.1 | 1.3927 | 4.2 |
| 4/17/2018 14:59 | 0.8 | 1.6 | 5   | 20.8 | 15.4 | 35.8 | 1.3673 | 4.1 |
| 4/17/2018 15:00 | 0.9 | 2   | 3.2 | 21   | 14.9 | 35.2 | 1.3067 | 4.1 |
| 4/17/2018 15:01 | 0.9 | 1.4 | 3.7 | 20.4 | 14.9 | 34.6 | 1.3165 | 4.2 |
| 4/17/2018 15:02 | 0.9 | 1.8 | 2.5 | 20.6 | 14.9 | 33.9 | 1.3083 | 4.1 |
| 4/17/2018 15:03 | 0.8 | 1.1 | 4.3 | 20.6 | 14.9 | 33.4 | 1.3133 | 4.2 |
| 4/17/2018 15:04 | 1   | 1.2 | 3.5 | 20.6 | 14.2 | 32.6 | 1.1902 | 4   |
| 4/17/2018 15:05 | 1.6 | 4   | 4.8 | 21.1 | 13.4 | 30.8 | 0.9521 | 4   |
| 4/17/2018 15:06 | 2.6 | 4   | 5   | 21.9 | 13   | 18.2 | 0.8227 | 3.8 |
| 4/17/2018 15:07 | 3.4 | 4.8 | 4.2 | 22.1 | 12.8 | 14.6 | 0.8028 | 3.9 |

|                 |      |      |      |       |      |       |        |     |
|-----------------|------|------|------|-------|------|-------|--------|-----|
| 4/17/2018 15:08 | 4.2  | 6.2  | 6.2  | 23.2  | 11.6 | 13.6  | 0.7611 | 4   |
| 4/17/2018 15:09 | 4.9  | 6.9  | 5.1  | 24.1  | 10.7 | 10.7  | 0.6753 | 4.1 |
| 4/17/2018 15:10 | 5.9  | 8.4  | 5.3  | 24.6  | 10.2 | 10.3  | 0.5768 | 4.2 |
| 4/17/2018 15:11 | 6.8  | 8.5  | 6.1  | 25.1  | 9.9  | 10    | 0.5673 | 4.2 |
| 4/17/2018 15:12 | 7.1  | 7.9  | 6.1  | 24.9  | 10.2 | 9.7   | 0.5665 | 4.2 |
| 4/17/2018 15:13 | 7.5  | 8.7  | 5.8  | 25.7  | 9.6  | 9.3   | 0.5009 | 4.1 |
| 4/17/2018 15:14 | 7.9  | 9.8  | 6.8  | 26.1  | 9.4  | 8.6   | 0.4552 | 4.1 |
| 4/17/2018 15:15 | 8.4  | 9.5  | 7.1  | 26.3  | 9.1  | 7.9   | 0.4494 | 4.1 |
| 4/17/2018 15:16 | 8.8  | 10.5 | 7.1  | 27    | 9.2  | 7.2   | 0.444  | 4.3 |
| 4/17/2018 15:17 | 9.4  | 11.3 | 7.6  | 27.4  | 8.6  | 6.5   | 0.3916 | 4.3 |
| 4/17/2018 15:18 | 9.9  | 10.2 | 9.2  | 27.5  | 8.4  | 5.8   | 0.4076 | 4.1 |
| 4/17/2018 15:19 | 10   | 10.6 | 7.3  | 27.2  | 8.6  | 5.3   | 0.4066 | 4.1 |
| 4/17/2018 15:20 | 10   | 10.8 | 6    | 27.4  | 8.2  | 4.8   | 0.3931 | 4   |
| 4/17/2018 15:21 | 10.1 | 10.9 | 7.4  | 27.3  | 8.3  | 4.3   | 0.3805 | 3.9 |
| 4/17/2018 15:22 | 10.3 | 11.2 | 6.9  | 27.2  | 8.2  | 4     | 0.3688 | 4   |
| 4/17/2018 15:23 | 10.1 | 10.2 | 7.8  | 27    | 8.5  | 3.9   | 0.3889 | 4   |
| 4/17/2018 15:24 | 10   | 10.4 | 7.2  | 27.1  | 8.8  | 3.6   | 0.3562 | 4   |
| 4/17/2018 15:25 | 10   | 10.1 | 5.2  | 27.4  | 8.3  | 3.5   | 0.3827 | 3.9 |
| 4/17/2018 15:26 | 10.3 | 11.8 | 8.8  | 28.9  | 7.9  | 3.3   | 0.3274 | 4   |
| 4/17/2018 15:27 | 10.3 | 9.5  | 5.7  | 26.7  | 8.1  | 3.2   | 0.3777 | 3.9 |
| 4/17/2018 15:28 | 9.8  | 8.9  | 6.3  | 25.8  | 8.2  | 3.1   | 0.3794 | 3.9 |
| 4/17/2018 15:29 | 8.8  | 8.5  | 6.2  | 25.6  | 9    | 3.1   | 0.393  | 3.9 |
| 4/17/2018 15:30 | 8.3  | 8.1  | 5.2  | 25.4  | 10.5 | 3     | 0.4098 | 4   |
| 4/17/2018 15:31 | 6.5  | 3.2  | 13.3 | 33.7  | 59.5 | 82.1  | 0.696  | 4.1 |
| 4/17/2018 15:32 | 3.8  | 2.3  | 24   | 81.7  | 94.5 | 323.8 | 1.8976 | 4.3 |
| 4/17/2018 15:33 | 1.4  | 3.4  | 50.6 | 215.2 | 84.3 | 349.9 | 2.8388 | 4.6 |
| 4/17/2018 15:34 | 0.3  | 0.2  | 61.9 | 285.7 | 93.4 | 387.5 | 4.0911 | 5.3 |
| 4/17/2018 15:35 | 0.3  | 1.5  | 62.2 | 297   | 89.2 | 391.2 | 4.4487 | 5.7 |
| 4/17/2018 15:36 | 0.3  | 0.1  | 67.7 | 309.9 | 87.3 | 392.2 | 5.2723 | 6   |
| 4/17/2018 15:37 | 0.3  | 1.8  | 67.9 | 300.3 | 81.9 | 364.1 | 5.6317 | 6.1 |
| 4/17/2018 15:38 | 0.2  | 0.2  | 64.5 | 292.8 | 79.8 | 361.3 | 6.0469 | 6   |
| 4/17/2018 15:39 | 0.2  | 0.3  | 63.5 | 276.1 | 77.3 | 366.6 | 6.3017 | 5.7 |
| 4/17/2018 15:40 | 0.2  | 0.9  | 61.6 | 258.5 | 71.2 | 346.2 | 6.2391 | 5.8 |
| 4/17/2018 15:41 | 0.2  | 0.5  | 54.3 | 235.1 | 70.9 | 330.2 | 6.0773 | 5.8 |
| 4/17/2018 15:42 | 0.2  | 2.2  | 83.2 | 245.5 | 70.8 | 323.2 | 6.3933 | 5.8 |
| 4/17/2018 15:43 | 0.2  | -0.4 | 48.6 | 223.5 | 63.7 | 322.5 | 6.6584 | 5.9 |
| 4/17/2018 15:44 | 0.2  | 2.5  | 57.6 | 226.5 | 62.5 | 293.3 | 6.7057 | 5.8 |
| 4/17/2018 15:45 | 0.2  | 0.1  | 76.3 | 221.6 | 63   | 321.2 | 7.1836 | 6   |
| 4/17/2018 15:46 | 0.3  | 1.9  | 49.8 | 221.5 | 60.5 | 324.1 | 7.2042 | 6   |
| 4/17/2018 15:47 | 0.3  | 0.8  | 51.2 | 210.4 | 60.2 | 318.7 | 7.3729 | 6.1 |
| 4/17/2018 15:48 | 0.3  | 0.7  | 52.5 | 194.8 | 56.3 | 297.1 | 7.0388 | 6   |
| 4/17/2018 15:49 | 0.3  | 0.7  | 87.1 | 191.8 | 55   | 300.4 | 7.0795 | 5.9 |
| 4/17/2018 15:50 | 0.3  | 1    | 44.4 | 178.1 | 52.5 | 295.4 | 6.8823 | 5.8 |
| 4/17/2018 15:51 | 0.3  | 0.6  | 47   | 182.5 | 53.1 | 290.1 | 7.2858 | 5.9 |
| 4/17/2018 15:52 | 0.2  | 1.9  | 67.6 | 167.5 | 49.4 | 281.6 | 6.8116 | 5.9 |
| 4/17/2018 15:53 | 0.2  | 1.1  | 42.8 | 168.5 | 49.7 | 285   | 7.1633 | 6   |
| 4/17/2018 15:54 | 0.2  | 1.1  | 39.8 | 149.4 | 47.3 | 276.8 | 6.6967 | 6   |

|                 |     |      |      |       |      |       |        |     |
|-----------------|-----|------|------|-------|------|-------|--------|-----|
| 4/17/2018 15:55 | 0.2 | 1.8  | 43.4 | 156.1 | 45.2 | 277.2 | 6.8235 | 5.9 |
| 4/17/2018 15:56 | 0.2 | 1.3  | 64.3 | 146.1 | 45.3 | 269.9 | 6.8317 | 5.5 |
| 4/17/2018 15:57 | 0.2 | 1.5  | 40.2 | 153.4 | 44.7 | 261.5 | 7.1214 | 5.5 |
| 4/17/2018 15:58 | 0.2 | 0.3  | 37.6 | 131.9 | 42.2 | 258.6 | 6.5715 | 4.8 |
| 4/17/2018 15:59 | 0.2 | 1.1  | 42.3 | 132.8 | 40.3 | 241.1 | 6.4952 | 3.5 |
| 4/17/2018 16:00 | 0.2 | 1.1  | 64.4 | 131.1 | 40.2 | 239   | 6.8024 | 3.6 |
| 4/17/2018 16:01 | 0.2 | 1    | 36   | 126.2 | 39.8 | 253.2 | 6.7308 | 4.1 |
| 4/17/2018 16:02 | 0.2 | 1    | 36.7 | 125.6 | 38.7 | 249   | 6.6774 | 4.1 |
| 4/17/2018 16:03 | 0.2 | 0.9  | 57.3 | 123.8 | 37.9 | 239.9 | 6.6598 | 3.6 |
| 4/17/2018 16:04 | 0.2 | 0.9  | 38.5 | 123.8 | 37.4 | 247   | 6.7804 | 4.1 |
| 4/17/2018 16:05 | 0.2 | 0.6  | 36.6 | 119.9 | 36.4 | 244.3 | 6.7798 | 4.6 |
| 4/17/2018 16:06 | 0.2 | 0.9  | 37.6 | 116.9 | 36   | 241.8 | 6.7733 | 4.4 |
| 4/17/2018 16:07 | 0.2 | -0.4 | 33.7 | 109.8 | 35.1 | 236.2 | 6.6062 | 3.6 |
| 4/17/2018 16:08 | 0.2 | 1.3  | 35.3 | 111.9 | 33.7 | 229.1 | 6.4932 | 4.2 |
| 4/17/2018 16:09 | 0.2 | 1.7  | 36.7 | 115.4 | 34.6 | 238.2 | 6.8736 | 4.6 |
| 4/17/2018 16:10 | 0.2 | 1.1  | 32.6 | 98    | 32.7 | 232   | 6.3753 | 4.1 |
| 4/17/2018 16:11 | 0.2 | 0.7  | 31   | 92.8  | 30.4 | 200.2 | 5.9373 | 3.4 |
| 4/17/2018 16:12 | 0.2 | 2.3  | 32.2 | 98.4  | 30.7 | 212.2 | 6.2123 | 3.9 |
| 4/17/2018 16:13 | 0.2 | 1    | 29.9 | 91.4  | 30.7 | 209.8 | 6.1788 | 4.1 |
| 4/17/2018 16:14 | 0.2 | 1.5  | 31.4 | 91.6  | 29   | 191.8 | 5.8453 | 3.5 |
| 4/17/2018 16:15 | 0.2 | 0.6  | 31.9 | 95    | 29.4 | 205.2 | 6.2606 | 3.4 |
| 4/17/2018 16:16 | 0.2 | 0.5  | 29.5 | 90.4  | 28.6 | 207.4 | 6.0354 | 3.9 |
| 4/17/2018 16:17 | 0.2 | 0.3  | 29.9 | 84    | 27.5 | 195   | 5.7277 | 4   |
| 4/17/2018 16:18 | 0.3 | 1.2  | 28.4 | 84.3  | 26.7 | 183.9 | 5.6857 | 3.3 |
| 4/17/2018 16:19 | 0.3 | 0.9  | 28.6 | 83.5  | 26.8 | 189.2 | 5.7585 | 3.3 |
| 4/17/2018 16:20 | 0.2 | 1    | 27.8 | 80.9  | 26.3 | 192.6 | 5.7278 | 3.8 |
| 4/17/2018 16:21 | 0.2 | 0.7  | 25.4 | 78.5  | 25.5 | 178.3 | 5.4851 | 4   |
| 4/17/2018 16:22 | 0.2 | 0.9  | 25.4 | 76.3  | 24.9 | 168.1 | 5.3972 | 3.2 |
| 4/17/2018 16:23 | 0.1 | 1    | 26.4 | 73.7  | 24.5 | 172.6 | 5.4072 | 3.5 |
| 4/17/2018 16:24 | 0.1 | 0.8  | 26.6 | 73.7  | 24.1 | 173.2 | 5.3172 | 4.1 |
| 4/17/2018 16:25 | 0.1 | 0.7  | 26.7 | 70.5  | 23.8 | 173.3 | 5.2843 | 4.5 |
| 4/17/2018 16:26 | 0.1 | 0.4  | 25.9 | 71.9  | 23.5 | 178.1 | 5.3007 | 3.5 |
| 4/17/2018 16:27 | 0.1 | 1.5  | 25.3 | 74.6  | 23.2 | 172.8 | 5.3479 | 4   |
| 4/17/2018 16:28 | 0.1 | 1.3  | 24.7 | 72.7  | 22.9 | 176.5 | 5.3129 | 4.5 |
| 4/17/2018 16:29 | 0.1 | 0.5  | 24.8 | 68.7  | 22.6 | 167.7 | 5.3069 | 4.4 |
| 4/17/2018 16:30 | 0.1 | 1.6  | 23.9 | 67.1  | 21.9 | 166   | 5.0297 | 3.4 |
| 4/17/2018 16:31 | 0   | 0.2  | 22.9 | 65.8  | 21.7 | 164.7 | 5.0645 | 4   |
| 4/17/2018 16:32 | 0   | 1    | 22.2 | 63.3  | 21.5 | 159.7 | 5.0479 | 4.4 |
| 4/17/2018 16:33 | 0.1 | 1.1  | 21.3 | 60    | 20.9 | 166.4 | 4.809  | 4.1 |
| 4/17/2018 16:34 | 0.1 | 1    | 19.8 | 59    | 20.1 | 146.1 | 4.5648 | 3.3 |
| 4/17/2018 16:35 | 0.1 | 0.7  | 20.7 | 62.7  | 20.2 | 150.8 | 4.8538 | 4.1 |
| 4/17/2018 16:36 | 0   | 0.8  | 20.9 | 59.5  | 20   | 153.6 | 4.7645 | 4.4 |
| 4/17/2018 16:37 | 0   | 1.2  | 21.4 | 58    | 19.4 | 151.6 | 4.5642 | 3.9 |
| 4/17/2018 16:38 | 0   | 1.2  | 22.4 | 62    | 19.7 | 153.2 | 4.893  | 3.5 |
| 4/17/2018 16:39 | 0.1 | 0.8  | 23.1 | 59.1  | 19.4 | 156.6 | 4.7792 | 4.3 |
| 4/17/2018 16:40 | 0.1 | 0.6  | 22.1 | 59.3  | 18.9 | 152.4 | 4.7072 | 4.7 |
| 4/17/2018 16:41 | 0.1 | 1    | 20.7 | 59.1  | 19.2 | 152.5 | 4.919  | 3.8 |

|                 |     |     |      |      |      |       |         |     |
|-----------------|-----|-----|------|------|------|-------|---------|-----|
| 4/17/2018 16:42 | 0.1 | 1   | 19.3 | 56.4 | 19.1 | 137.9 | 4.5044  | 3.6 |
| 4/17/2018 16:43 | 0.1 | 0.3 | 18.3 | 58   | 19.1 | 145.7 | 4.7383  | 4.4 |
| 4/17/2018 16:44 | 0.2 | 1   | 20.2 | 54   | 18.2 | 145   | 2.8209  | 4.2 |
| 4/17/2018 16:45 | 0.2 | 0.9 | 17.5 | 48.7 | 17.4 | 125.8 | 0.0488  | 1.2 |
| 4/17/2018 16:46 | 0.2 | 1.6 | 16.4 | 45.6 | 17.2 | 121.2 | -0.0216 | 0.1 |
| 4/17/2018 16:47 | 0.2 | 0.2 | 17.9 | 43.3 | 16.7 | 111.7 | -0.0357 | 0.1 |
| 4/17/2018 16:48 | 0.2 | 0.7 | 11.6 | 35.1 | 15.9 | 88.1  | -0.0308 | 0.2 |
| 4/17/2018 16:49 | 0.3 | 1   | 11   | 33   | 16   | 80.1  | -0.0339 | 0.2 |
| 4/17/2018 16:50 | 0.4 | 1.9 | 7.9  | 21.5 | 16.2 | 50.2  | -0.0439 | 0.2 |
| 4/17/2018 16:51 | 0.6 | 2.4 | 6.8  | 19.7 | 15.4 | 29.4  | -0.0286 | 0.1 |
| 4/17/2018 16:52 | 0.9 | 2.5 | 6.1  | 20.2 | 14.8 | 26.6  | -0.044  | 0.1 |
| 4/17/2018 16:53 | 0.9 | 2.2 | 6.8  | 20.2 | 14.7 | 24.1  | -0.0307 | 0.1 |
| 4/17/2018 16:54 | 1   | 2.4 | 4.2  | 20.1 | 14.6 | 24    | -0.0395 | 0.1 |
| 4/17/2018 16:55 | 1   | 3.1 | 5.7  | 19.5 | 14.5 | 24.1  | -0.0361 | 0.1 |
| 4/17/2018 16:56 | 1   | 2.3 | 6.5  | 19.4 | 14.1 | 24.1  | -0.0163 | 0.3 |
| 4/17/2018 16:57 | 1.1 | 3.2 | 4.2  | 18.6 | 13.3 | 23.6  | 0.1614  | 1.7 |
| 4/17/2018 16:58 | 1.2 | 2.5 | 5.2  | 18.8 | 13.3 | 23.1  | 0.1392  | 2.1 |
| 4/17/2018 16:59 | 1.2 | 2.5 | 5.3  | 19.4 | 13.2 | 22.7  | 0.1434  | 2   |
| 4/17/2018 17:00 | 1.2 | 2.2 | 4.6  | 19.3 | 13.4 | 22.4  | 0.1522  | 2   |
| 4/17/2018 17:01 | 1.3 | 3   | 4.5  | 19.4 | 13.3 | 21.8  | 0.1397  | 1.9 |
| 4/17/2018 17:02 | 1.4 | 3.1 | 3.8  | 18.4 | 12.8 | 20.4  | 0.1461  | 1.9 |
| 4/17/2018 17:03 | 1.6 | 3.9 | 3.4  | 18.4 | 11.7 | 18.9  | 0.1494  | 1.8 |
| 4/17/2018 17:04 | 1.8 | 3.3 | 5.7  | 19.3 | 12   | 17.4  | 0.1546  | 1.8 |
| 4/17/2018 17:05 | 1.9 | 3.5 | 4.5  | 19.2 | 6.6  | 9.2   | 0.7217  | 2.1 |
| 4/17/2018 17:06 | 1.9 | 4   | 5.8  | 19.8 | 0.7  | 0.6   | 0.8686  | 2.3 |
| 4/17/2018 17:07 | 1.9 | 4.1 | 5    | 19.1 | 0.7  | 0     | 0.8704  | 2.3 |
| 4/17/2018 17:08 | 2   | 4.4 | 5.5  | 19.1 | 0.6  | 0.1   | 0.7476  | 2.2 |
| 4/17/2018 17:09 | 2.1 | 3.9 | 5.2  | 19.2 | 0.6  | 0.1   | 0.7341  | 2.2 |
| 4/17/2018 17:10 | 2.2 | 4.3 | 4.7  | 19.1 | 0.6  | 0.1   | 0.66    | 2.3 |
| 4/17/2018 17:11 | 2.4 | 4.7 | 5.2  | 19.1 | 0.6  | 0.1   | 0.633   | 2.4 |
| 4/17/2018 17:12 | 2.5 | 4.5 | 5.6  | 19.7 | 0.6  | 0.1   | 0.6554  | 2.3 |
| 4/17/2018 17:13 | 2.6 | 5.1 | 5.5  | 19.8 | 0    | 0     | 0.6435  | 2.2 |
| 4/17/2018 17:14 | 2.5 | 4.4 | 5    | 19.9 | 0    | 0     | 0.6539  | 2.2 |
| 4/17/2018 17:15 | 2.6 | 5.6 | 5    | 20.1 | 0.8  | 7.6   | 0.5881  | 2.3 |
| 4/17/2018 17:16 | 2.7 | 5.1 | 4.8  | 20.2 | 8.7  | 5.1   | 0.5409  | 2.5 |
| 4/17/2018 17:17 | 3   | 5.2 | 5.9  | 20.5 | 10   | 4.5   | 0.217   | 2.6 |
| 4/17/2018 17:18 | 2.9 | 4.8 | 5    | 19.8 | 10.2 | 4.3   | 0.1403  | 2.7 |
| 4/17/2018 17:19 | 2.8 | 5   | 5    | 19.9 | 10.2 | 4.1   | 0.1493  | 2.8 |
| 4/17/2018 17:20 | 2.9 | 5   | 5.7  | 20.5 | 10   | 4.1   | 0.1387  | 2.2 |
| 4/17/2018 17:21 | 3   | 5   | 4.2  | 20.5 | 10.1 | 4.1   | 0.1432  | 2.5 |
| 4/17/2018 17:22 | 3   | 5.1 | 5.1  | 20.5 | 8.8  | 8.2   | 0.1394  | 2.8 |
| 4/17/2018 17:23 | 3.1 | 6.3 | 4.6  | 20.6 | 0.7  | 85.5  | 0.1399  | 2.3 |
| 4/17/2018 17:24 | 3.2 | 5.6 | 5.8  | 20.7 | 0.3  | 76.5  | 0.1445  | 2.2 |
| 4/17/2018 17:25 | 3.3 | 5   | 4.5  | 20.9 | 0.8  | 49    | 0.1352  | 2.3 |
| 4/17/2018 17:26 | 3.3 | 5.4 | 6.7  | 20.7 | 1.6  | 35.3  | 0.1462  | 2.3 |
| 4/17/2018 17:27 | 3.3 | 5.9 | 5.3  | 21   | 2.3  | 27.9  | 0.1453  | 2.4 |
| 4/17/2018 17:28 | 3.3 | 5.6 | 5.8  | 21.2 | 2.9  | 25.6  | 0.136   | 2.4 |

|                 |     |      |     |      |      |      |        |     |
|-----------------|-----|------|-----|------|------|------|--------|-----|
| 4/17/2018 17:29 | 3.5 | 6.8  | 7.2 | 20.7 | 3.7  | 25.3 | 0.1473 | 2.2 |
| 4/17/2018 17:30 | 3.7 | 5.9  | 4.9 | 21   | 4.2  | 24.8 | 0.1296 | 2.2 |
| 4/17/2018 17:31 | 3.8 | 6.6  | 3.5 | 21   | 4.7  | 24.6 | 0.1918 | 2   |
| 4/17/2018 17:32 | 3.8 | 6.1  | 6.7 | 21.2 | 8    | 16.1 | 0.3621 | 1.9 |
| 4/17/2018 17:33 | 3.9 | 6.2  | 5.2 | 21.2 | 5.3  | 29.6 | 0.3557 | 1.7 |
| 4/17/2018 17:34 | 4   | 6.8  | 5.4 | 21.5 | 7    | 36.5 | 0.3473 | 1.8 |
| 4/17/2018 17:35 | 4.2 | 7.1  | 4.5 | 21.8 | 7.9  | 46.7 | 0.3264 | 2   |
| 4/17/2018 17:36 | 4.3 | 6.9  | 4.9 | 26.8 | 7.8  | 52.5 | 0.331  | 2   |
| 4/17/2018 17:37 | 5   | 10.5 | 7   | 18.8 | 7.4  | 56.1 | 0.3256 | 2   |
| 4/17/2018 17:38 | 5.9 | 10   | 7   | 22.9 | 6.9  | 71.5 | 0.299  | 2.2 |
| 4/17/2018 17:39 | 6.9 | 11.5 | 8.8 | 25.3 | 6.4  | 77   | 0.3007 | 2.2 |
| 4/17/2018 17:40 | 7.4 | 11.8 | 6.7 | 25.8 | 5.8  | 82.6 | 0.2812 | 2.3 |
| 4/17/2018 17:41 | 7.6 | 11.8 | 8.7 | 25.9 | 5.2  | 85.4 | 0.2881 | 2.3 |
| 4/17/2018 17:42 | 7.8 | 12.4 | 9.3 | 25.9 | 4.7  | 85.9 | 0.2698 | 2.3 |
| 4/17/2018 17:43 | 7.9 | 12.2 | 8.3 | 26   | 4.5  | 86.5 | 0.2692 | 2.4 |
| 4/17/2018 17:44 | 8.1 | 12.5 | 7.1 | 26.1 | 4.5  | 87.4 | 0.2699 | 2.4 |
| 4/17/2018 17:45 | 8.1 | 11.7 | 7.5 | 26.1 | 3.8  | 88.5 | 0.2487 | 2.3 |
| 4/17/2018 17:46 | 8.3 | 12.3 | 7.3 | 26.5 | 3.1  | 89.8 | 0.2593 | 2.3 |
| 4/17/2018 17:47 | 8.5 | 12.3 | 7.5 | 26.8 | 2.9  | 90.9 | 0.2374 | 2.4 |
| 4/17/2018 17:48 | 8.7 | 13.7 | 8.3 | 27.8 | 2.7  | 92.4 | 0.2377 | 2.3 |
| 4/17/2018 17:49 | 9.4 | 14.5 | 9.8 | 28.1 | 2.6  | 93.9 | 0.2254 | 2.4 |
| 4/17/2018 17:50 | 9.6 | 12.4 | 9.3 | 26.9 | 2.4  | 94.9 | 0.2526 | 2.3 |
| 4/17/2018 17:51 | 9.5 | 12.2 | 7.9 | 26.9 | 2.3  | 96   | 0.2519 | 2.4 |
| 4/17/2018 17:52 | 8.6 | 11.6 | 8.6 | 25.9 | 2.2  | 96.9 | 0.2323 | 2.3 |
| 4/17/2018 17:53 | 8.3 | 10.5 | 8   | 25.5 | 2.1  | 97.6 | 0.2462 | 2.4 |
| 4/17/2018 17:54 | 7.6 | 9.2  | 7.1 | 24.7 | 2.1  | 98   | 0.2302 | 2.3 |
| 4/17/2018 17:55 | 7.2 | 9    | 5.9 | 24.3 | 2    | 98.5 | 0.2487 | 2.3 |
| 4/17/2018 17:56 | 6.5 | 8.3  | 4.6 | 23.5 | 2    | 98.9 | 0.2392 | 2.5 |
| 4/17/2018 17:57 | 6.4 | 9    | 5.6 | 23.9 | 1.9  | 99.7 | 0.2213 | 2.6 |
| 4/17/2018 17:58 | 6   | 7    | 5   | 22.8 | 1.7  | 96.5 | 0.2473 | 2.6 |
| 4/17/2018 17:59 | 5.7 | 6.8  | 7.1 | 22.5 | 8.7  | 41.7 | 0.2302 | 2.4 |
| 4/17/2018 18:00 |     |      | 4.7 | 22.1 | 68.3 | 46.3 | 0.2377 | 2.1 |
| 4/17/2018 18:01 |     |      | 5.5 | 22.6 | 85.6 | 20.1 | 0.2677 | 2.3 |
| 4/17/2018 18:02 |     |      | 4.2 | 22.1 | 87.2 | 17.6 | 0.2515 | 2.6 |
| 4/17/2018 18:03 |     |      | 4.6 | 22.4 | 87.3 | 17.9 | 0.2576 | 2.7 |
| 4/17/2018 18:04 |     |      | 4.7 | 22.1 | 87.4 | 18.1 | 0.2305 | 2.7 |
| 4/17/2018 18:05 |     |      | 2.2 | 22.1 | 87.5 | 18.1 | 0.2638 | 2.7 |
| 4/17/2018 18:06 |     |      | 5.4 | 21.7 | 79   | 18.1 | 0.2437 | 2.8 |
| 4/17/2018 18:07 |     |      | 5.7 | 21.8 | 8.7  | 10.3 | 0.2462 | 2.8 |
| 4/17/2018 18:08 |     |      | 5.1 | 21.6 | 4.4  | 3    | 0.1613 | 2.8 |
| 4/17/2018 18:09 |     |      | 5.1 | 21.6 | 4.5  | 2.6  | 0.1347 | 2.4 |
| 4/17/2018 18:10 |     |      | 6.2 | 21.8 | 4.4  | 2.7  | 0.147  | 2.5 |
| 4/17/2018 18:11 |     |      | 5.5 | 21.5 | 4.3  | 2.9  | 0.1363 | 2.5 |
| 4/17/2018 18:12 |     |      | 4.1 | 21.5 | 4.4  | 2.8  | 0.1545 | 2.7 |
| 4/17/2018 18:13 |     |      | 4.3 | 21.1 | 4.3  | 2.8  | 0.148  | 2.8 |
| 4/17/2018 18:14 |     |      | 4.9 | 21   | 4.2  | 2.8  | 0.1469 | 2.6 |
| 4/17/2018 18:15 |     |      | 3.7 | 21.1 | 4.3  | 2.8  | 0.1393 | 2.6 |

|                 |     |      |     |     |        |     |
|-----------------|-----|------|-----|-----|--------|-----|
| 4/17/2018 18:16 | 3.5 | 21   | 4.2 | 2.8 | 0.1368 | 2.7 |
| 4/17/2018 18:17 | 4.5 | 21   | 4.1 | 2.8 | 0.1532 | 2.7 |
| 4/17/2018 18:18 | 4.2 | 21   | 4.1 | 2.8 | 0.1371 | 2.9 |
| 4/17/2018 18:19 | 4.8 | 21   | 4.1 | 2.8 | 0.2181 | 3.5 |
| 4/17/2018 18:20 | 4.2 | 20.7 | 4.1 | 2.8 | 0.2368 | 3.7 |
| 4/17/2018 18:21 | 3.2 | 21   | 4   | 2.8 | 0.2232 | 3.7 |
| 4/17/2018 18:22 | 2.6 | 21   | 4.1 | 2.8 | 0.2215 | 3.9 |
| 4/17/2018 18:23 | 3.1 | 20.7 | 4.1 | 2.8 | 0.201  | 4   |
| 4/17/2018 18:24 | 4.8 | 20.8 | 4.2 | 2.7 | 0.2077 | 3.9 |
| 4/17/2018 18:25 | 5   | 21   | 4   | 2.7 | 0.2164 | 4   |
| 4/17/2018 18:26 | 3.2 | 20.9 | 4   | 2.7 | 0.208  | 4   |
| 4/17/2018 18:27 | 3.2 | 20.4 | 4   | 2.7 | 0.2134 | 4.1 |
| 4/17/2018 18:28 | 4.8 | 20.8 | 4   | 2.7 | 0.2036 | 4.1 |
| 4/17/2018 18:29 | 4.8 | 20.8 | 4   | 2.7 | 0.2156 | 4.1 |
| 4/17/2018 18:30 | 2.8 | 20.9 | 4   | 2.7 | 0.2045 | 4.2 |
| 4/17/2018 18:31 | 4.1 | 20.8 | 4   | 2.7 | 0.2095 | 4.2 |
| 4/17/2018 18:32 | 4   | 20.5 | 4.1 | 2.7 | 0.199  | 4.1 |
| 4/17/2018 18:33 | 3.5 | 20.6 | 4.1 | 2.7 | 0.203  | 4.1 |
| 4/17/2018 18:34 | 3.5 | 20.8 | 4.1 | 2.7 | 0.2054 | 4.1 |
| 4/17/2018 18:35 | 4.9 | 21   | 4   | 2.7 | 0.1942 | 4   |
| 4/17/2018 18:36 | 5.7 | 20.2 | 4.1 | 2.7 | 0.2041 | 4.2 |
| 4/17/2018 18:37 | 3.1 | 20.3 | 4.1 | 2.7 | 0.1955 | 4.2 |
| 4/17/2018 18:38 | 3.6 | 20.4 | 4.1 | 2.7 | 0.1987 | 4.1 |
| 4/17/2018 18:39 | 3.3 | 20.5 | 4.1 | 2.7 | 0.2032 | 4.1 |
| 4/17/2018 18:40 | 4.3 | 20.7 | 4.1 | 2.7 | 0.1936 | 3.9 |
| 4/17/2018 18:41 | 4.7 | 20.5 | 4.3 | 2.6 | 0.1975 | 3.9 |
| 4/17/2018 18:42 | 3.6 | 20.7 | 4.2 | 2.6 | 0.1924 | 3.5 |
| 4/17/2018 18:43 | 5.1 | 20.9 | 4.2 | 2.6 | 0.2018 | 3.7 |
| 4/17/2018 18:44 | 4   | 20.5 | 4.3 | 2.5 | 0.1787 | 4   |
| 4/17/2018 18:45 | 3.6 | 20.5 | 4.3 | 2.5 | 0.2025 | 4   |
| 4/17/2018 18:46 | 3.7 | 20.5 | 4.1 | 2.5 | 0.1987 | 4   |
| 4/17/2018 18:47 | 3.1 | 20.6 | 3.8 | 2.5 | 0.192  | 3.9 |
| 4/17/2018 18:48 | 3.4 | 20.7 | 3.9 | 2.5 | 0.2063 | 4   |
| 4/17/2018 18:49 | 3.4 | 20.8 | 4   | 2.5 | 0.1806 | 4   |
| 4/17/2018 18:50 | 2.9 | 20.4 | 3.9 | 2.5 | 0.1993 | 3.9 |
| 4/17/2018 18:51 | 3.5 | 20.5 | 3.9 | 2.5 | 0.1838 | 3.9 |
| 4/17/2018 18:52 | 3.5 | 20.5 | 4.1 | 2.5 | 0.1947 | 3.9 |
| 4/17/2018 18:53 | 2.7 | 20.5 | 3.9 | 2.5 | 0.2026 | 3.9 |
| 4/17/2018 18:54 | 3.1 | 20.2 | 3.9 | 2.5 | 0.1955 | 3.8 |
| 4/17/2018 18:55 |     | 20.4 | 4.1 | 2.5 | 0.1931 | 3.8 |
| 4/17/2018 18:56 |     | 20.2 | 3.9 | 2.4 | 0.188  | 3.9 |
| 4/17/2018 18:57 | 3.7 | 20.3 | 3.9 | 2.4 | 0.1937 | 3.8 |
| 4/17/2018 18:58 | 4.5 | 20.5 | 3.9 | 2.4 | 0.1827 | 3.8 |
| 4/17/2018 18:59 | 3.9 | 20.5 | 3.9 | 2.4 | 0.1928 | 3.7 |
| 4/17/2018 19:00 | 4.2 | 20.8 | 3.9 | 2.4 | 0.1875 | 3.7 |
| 4/17/2018 19:01 | 3.6 | 20.4 | 3.9 | 2.4 | 0.1935 | 2.7 |
| 4/17/2018 19:02 | 2.9 | 20.6 | 4   | 2.4 | 0.1939 | 1.4 |

|                 |     |      |     |     |        |     |
|-----------------|-----|------|-----|-----|--------|-----|
| 4/17/2018 19:03 | 3.9 | 21   | 4.1 | 2.3 | 0.1778 | 1.4 |
| 4/17/2018 19:04 | 3.4 | 20.7 | 3.9 | 2.3 | 0.2018 | 1.6 |
| 4/17/2018 19:05 | 3.1 | 20.6 | 3.9 | 2.3 | 0.1746 | 1.6 |
| 4/17/2018 19:06 | 2.9 | 20.9 | 4   | 2.3 | 0.1893 | 1.5 |
| 4/17/2018 19:07 | 4.6 | 20.8 | 3.8 | 2.3 | 0.1926 | 1.4 |
| 4/17/2018 19:08 | 4.6 | 21.1 | 4   | 2.3 | 0.1684 | 1.4 |
| 4/17/2018 19:09 | 4.1 | 21.1 | 4.1 | 2.3 | 0.1869 | 1.4 |
| 4/17/2018 19:10 | 3.4 | 20.8 | 4.1 | 2.3 | 0.1792 | 1.4 |
| 4/17/2018 19:11 | 4.5 | 20.8 | 4.2 | 2.3 | 0.1838 | 1.4 |
| 4/17/2018 19:12 | 4.3 | 21   | 4.3 | 2.3 | 0.1715 | 1.4 |
| 4/17/2018 19:13 | 4.1 | 21.2 | 4.3 | 2.3 | 0.191  | 1.4 |
| 4/17/2018 19:14 | 4.3 | 21.1 | 4.3 | 2.3 | 0.1855 | 1.4 |
| 4/17/2018 19:15 | 3   | 21.2 | 4.2 | 2.3 | 0.1831 | 1.5 |
| 4/17/2018 19:16 | 4.2 | 21.2 | 4.2 | 2.3 | 0.1958 | 1.5 |
| 4/17/2018 19:17 | 3.6 | 21.1 | 4.3 | 2.3 | 0.1749 | 1.6 |
| 4/17/2018 19:18 | 2.9 | 20.8 | 4.1 | 2.4 | 0.1921 | 1.7 |
| 4/17/2018 19:19 | 3   | 20.8 | 4.1 | 2.4 | 0.1896 | 1.7 |
| 4/17/2018 19:20 | 5.2 | 21   | 4   | 2.5 | 0.1901 | 1.8 |
| 4/17/2018 19:21 | 3.9 | 21   | 4.2 | 2.6 | 0.1953 | 2   |
| 4/17/2018 19:22 | 5.1 | 20.8 | 4.3 | 2.6 | 0.1729 | 2   |
| 4/17/2018 19:23 | 4.1 | 20.8 | 4.1 | 2.6 | 0.1963 | 2   |
| 4/17/2018 19:24 | 3.4 | 20.8 | 4.3 | 2.6 | 0.1803 | 2.1 |
| 4/17/2018 19:25 | 2.6 | 20.8 | 4.1 | 2.6 | 0.1901 | 2.3 |
| 4/17/2018 19:26 | 3.2 | 20.7 | 4.1 | 2.7 | 0.1891 | 2.4 |
| 4/17/2018 19:27 | 3.2 | 20.6 | 4.1 | 2.7 | 0.1889 | 2.5 |
| 4/17/2018 19:28 | 3.4 | 20.8 | 4.1 | 2.7 | 0.1948 | 2.6 |
| 4/17/2018 19:29 | 2.4 | 21.2 | 4   | 2.7 | 0.1845 | 2.7 |
| 4/17/2018 19:30 | 3.7 | 20.7 | 4.2 | 2.7 | 0.1829 | 2.5 |
| 4/17/2018 19:31 | 3.7 | 21   | 4.1 | 2.7 | 0.181  | 2.6 |
| 4/17/2018 19:32 | 2.5 | 20.8 | 4.3 | 2.7 | 0.1723 | 2.4 |
| 4/17/2018 19:33 | 1.6 | 20.9 | 4.1 | 2.7 | 0.1852 | 2.4 |
| 4/17/2018 19:34 | 4.5 | 20.7 | 4.1 | 2.6 | 0.1734 | 2.3 |
| 4/17/2018 19:35 | 3.2 | 20.8 | 4   | 2.6 | 0.1938 | 2.4 |
| 4/17/2018 19:36 | 4.1 | 20.7 | 3.9 | 2.6 | 0.1864 | 2.4 |
| 4/17/2018 19:37 | 4.7 | 20.6 | 4.1 | 2.6 | 0.1749 | 2.4 |
| 4/17/2018 19:38 | 3.8 | 20.8 | 4   | 2.6 | 0.1863 | 2.4 |
| 4/17/2018 19:39 | 2.8 | 21   | 4.1 | 2.6 | 0.1745 | 2.5 |
| 4/17/2018 19:40 | 2.4 | 20.7 | 4.1 | 2.6 | 0.1905 | 2.5 |
| 4/17/2018 19:41 | 2.9 | 20.8 | 4   | 2.6 | 0.1731 | 2.5 |
| 4/17/2018 19:42 | 5.3 | 20.8 | 4.1 | 2.6 | 0.1735 | 2.4 |
| 4/17/2018 19:43 | 3   | 20.8 | 4.2 | 2.6 | 0.182  | 2.6 |
| 4/17/2018 19:44 | 3.7 | 20.8 | 4.2 | 2.6 | 0.1755 | 2.4 |
| 4/17/2018 19:45 | 3.2 | 20.9 | 4.2 | 2.6 | 0.1823 | 2.5 |
| 4/17/2018 19:46 | 3.7 | 20.6 | 4.2 | 2.6 | 0.1671 | 2.7 |
| 4/17/2018 19:47 | 3.3 | 20.8 | 4   | 2.6 | 0.1764 | 2.7 |
| 4/17/2018 19:48 | 3.7 | 20.8 | 3.8 | 2.6 | 0.1804 | 2.4 |
| 4/17/2018 19:49 | 3   | 20.9 | 3.7 | 2.6 | 0.1672 | 2.8 |



|                 |     |      |     |     |        |     |
|-----------------|-----|------|-----|-----|--------|-----|
| 4/17/2018 19:50 | 3.6 | 20.6 | 3.7 | 2.6 | 0.1761 | 3.1 |
| 4/17/2018 19:51 | 3.4 | 20.7 | 3.7 | 2.6 | 0.1747 | 3.2 |
| 4/17/2018 19:52 | 2.3 | 20.5 | 3.7 | 2.6 | 0.1751 | 3.2 |
| 4/17/2018 19:53 | 4.1 | 20.5 | 3.6 | 2.6 | 0.1858 | 1.8 |
| 4/17/2018 19:54 | 2.7 | 20.9 | 3.7 | 2.6 | 0.1676 | 1.6 |
| 4/17/2018 19:55 | 2.8 | 20.8 | 3.6 | 2.7 | 0.184  | 2.2 |
| 4/17/2018 19:56 | 2.8 | 20.7 | 3.6 | 2.7 | 0.1732 | 2.8 |
| 4/17/2018 19:57 | 2.7 | 20.8 | 3.6 | 2.7 | 0.1757 | 3.4 |
| 4/17/2018 19:58 | 4.3 | 20.7 | 3.6 | 2.7 | 0.1762 | 3.4 |
| 4/17/2018 19:59 | 1.7 | 20.4 | 3.6 | 2.7 | 0.1663 | 3.5 |
| 4/17/2018 20:00 | 3.6 | 20.9 | 3.6 | 2.7 | 0.1721 | 3.7 |
| 4/17/2018 20:01 | 1.8 | 20.5 | 3.5 | 2.7 | 0.182  | 3.9 |
| 4/17/2018 20:02 | 4.5 | 20.5 | 3.6 | 2.7 | 0.1665 | 3.9 |
| 4/17/2018 20:03 | 3.4 | 20.7 | 3.6 | 2.7 | 0.1826 | 3.9 |
| 4/17/2018 20:04 | 4.6 | 20.7 | 3.6 | 2.7 | 0.1662 | 3.9 |
| 4/17/2018 20:05 | 2.5 | 20.7 | 3.5 | 2.6 | 0.179  | 3.9 |
| 4/17/2018 20:06 | 1.1 | 20.7 | 3.5 | 2.7 | 0.1776 | 4   |
| 4/17/2018 20:07 | 3.2 | 20.5 | 3.5 | 2.7 | 0.1696 | 4.1 |
| 4/17/2018 20:08 | 2.7 | 20.3 | 3.5 | 2.7 | 0.1768 | 4.1 |
| 4/17/2018 20:09 | 2.1 | 20.7 | 3.5 | 2.7 | 0.1632 | 4.1 |
| 4/17/2018 20:10 | 3.6 | 20.5 | 3.5 | 2.7 | 0.1803 | 4.1 |
| 4/17/2018 20:11 | 2.9 | 20.6 | 3.5 | 2.7 | 0.1743 | 4.1 |
| 4/17/2018 20:12 | 3.2 | 20.6 | 3.5 | 2.7 | 0.1653 | 4.1 |
| 4/17/2018 20:13 | 3.8 | 20.8 | 3.5 | 2.7 | 0.1805 | 4.2 |
| 4/17/2018 20:14 | 3.5 | 20.5 | 3.5 | 2.7 | 0.1581 | 4.3 |
| 4/17/2018 20:15 | 5.2 | 20.7 | 3.6 | 2.7 | 0.1653 | 4.3 |
| 4/17/2018 20:16 | 3.6 | 20.4 | 3.5 | 2.7 | 0.1764 | 4.3 |
| 4/17/2018 20:17 | 4   | 21.1 | 3.5 | 2.7 | 0.166  | 4.3 |
| 4/17/2018 20:18 | 3.1 | 20.5 | 3.5 | 2.7 | 0.1699 | 4.2 |
| 4/17/2018 20:19 | 2.8 | 20.7 | 3.5 | 2.7 | 0.1662 | 4.2 |
| 4/17/2018 20:20 | 3.3 | 20.7 | 3.5 | 2.7 | 0.1697 | 4   |
| 4/17/2018 20:21 | 3   | 20.7 | 3.5 | 2.7 | 0.171  | 4   |
| 4/17/2018 20:22 | 3.6 | 20.5 | 3.5 | 2.7 | 0.1711 | 4.1 |
| 4/17/2018 20:23 | 3.8 | 20.4 | 3.5 | 2.7 | 0.1769 | 4.1 |
| 4/17/2018 20:24 | 2.4 | 20.5 | 3.5 | 2.7 | 0.1681 | 4.2 |
| 4/17/2018 20:25 | 3.5 | 20.5 | 3.5 | 2.7 | 0.1752 | 4.3 |
| 4/17/2018 20:26 | 2.9 | 20.6 | 3.5 | 2.7 | 0.1705 | 4.4 |
| 4/17/2018 20:27 | 2.4 | 20.7 | 3.5 | 2.7 | 0.1646 | 3.9 |
| 4/17/2018 20:28 | 3.3 | 20.5 | 3.4 | 2.7 | 0.1803 | 4   |
| 4/17/2018 20:29 | 2.6 | 20.5 | 3.5 | 2.7 | 0.1625 | 4.3 |
| 4/17/2018 20:30 | 2.8 | 20.5 | 3.5 | 2.7 | 0.1735 | 4.4 |
| 4/17/2018 20:31 | 1.5 | 20.6 | 3.5 | 2.7 | 0.1743 | 4.4 |
| 4/17/2018 20:32 | 2.9 | 20.7 | 3.5 | 2.7 | 0.1625 | 4.2 |
| 4/17/2018 20:33 | 3.4 | 20.4 | 3.5 | 2.7 | 0.1749 | 3.8 |
| 4/17/2018 20:34 | 3.8 | 20.4 | 3.5 | 2.7 | 0.1659 | 4.1 |
| 4/17/2018 20:35 | 3.4 | 20.4 | 3.5 | 2.7 | 0.1693 | 4.1 |
| 4/17/2018 20:36 | 2.1 | 20.5 | 3.5 | 2.7 | 0.1719 | 4.2 |

|                 |     |      |     |     |        |     |
|-----------------|-----|------|-----|-----|--------|-----|
| 4/17/2018 20:37 | 2.6 | 20.6 | 3.4 | 2.7 | 0.1593 | 4.3 |
| 4/17/2018 20:38 | 2.8 | 20.5 | 3.5 | 2.7 | 0.1754 | 4.3 |
| 4/17/2018 20:39 | 3.1 | 20.7 | 3.5 | 2.7 | 0.167  | 4.4 |
| 4/17/2018 20:40 | 3.3 | 20.7 | 3.5 | 2.7 | 0.1635 | 4.5 |
| 4/17/2018 20:41 | 3.9 | 20.7 | 3.5 | 2.7 | 0.171  | 4.5 |
| 4/17/2018 20:42 | 2.9 | 20.4 | 3.5 | 2.7 | 0.1628 | 4.5 |
| 4/17/2018 20:43 | 3   | 20.2 | 3.5 | 2.6 | 0.1749 | 4.6 |
| 4/17/2018 20:44 | 2.1 | 20.4 | 3.5 | 2.6 | 0.1616 | 4.8 |
| 4/17/2018 20:45 | 3.2 | 20.6 | 3.5 | 2.6 | 0.1739 | 4.9 |
| 4/17/2018 20:46 | 1.7 | 20.6 | 3.5 | 2.7 | 0.1698 | 4.9 |
| 4/17/2018 20:47 | 3.2 | 20.5 | 3.5 | 2.7 | 0.1599 | 4.8 |
| 4/17/2018 20:48 | 2.8 | 20.5 | 3.4 | 2.7 | 0.1695 | 4.8 |
| 4/17/2018 20:49 | 3.6 | 20.7 | 3   | 2.7 | 0.1705 | 4.6 |
| 4/17/2018 20:50 | 3.7 | 20.6 | 3.1 | 2.7 | 0.1621 | 4.2 |
| 4/17/2018 20:51 | 2.1 | 20.5 | 3.1 | 2.7 | 0.1675 | 3.8 |
| 4/17/2018 20:52 | 4.7 | 20.6 | 3   | 2.7 | 0.1594 | 3.5 |
| 4/17/2018 20:53 | 3.2 | 20.5 | 3.1 | 2.6 | 0.1723 | 3.9 |
| 4/17/2018 20:54 | 2.9 | 20.3 | 3.1 | 2.6 | 0.1619 | 4.1 |
| 4/17/2018 20:55 | 3.6 | 20.7 | 3   | 2.6 | 0.1669 | 3.8 |
| 4/17/2018 20:56 | 3.2 | 20.7 | 3.1 | 2.6 | 0.1705 | 2.9 |
| 4/17/2018 20:57 | 2.7 | 20.6 | 3.1 | 2.6 | 0.1561 | 3.3 |
| 4/17/2018 20:58 | 2.9 | 20.7 | 3.1 | 2.6 | 0.1711 | 3.7 |
| 4/17/2018 20:59 | 2.2 | 20.6 | 3.1 | 2.6 | 0.1564 | 4   |
| 4/17/2018 21:00 | 2.2 | 20.6 | 3.1 | 2.6 | 0.1702 | 4.2 |
| 4/17/2018 21:01 | 2.6 | 20.4 | 3.1 | 2.6 | 0.1675 | 4.4 |
| 4/17/2018 21:02 | 1.6 | 20.5 | 3.1 | 2.6 | 0.1567 | 4.6 |
| 4/17/2018 21:03 | 3.8 | 20.5 | 3.1 | 2.6 | 0.1663 | 4.5 |
| 4/17/2018 21:04 | 2.6 | 20.4 | 3.1 | 2.6 | 0.159  | 4.3 |
| 4/17/2018 21:05 | 3.2 | 20.5 | 3.1 | 2.6 | 0.1712 | 4.4 |
| 4/17/2018 21:06 | 2.2 | 20.6 | 3.1 | 2.6 | 0.1669 | 4.6 |
| 4/17/2018 21:07 | 2.4 | 20.6 | 3.1 | 2.6 | 0.1576 | 4.6 |
| 4/17/2018 21:08 | 3   | 20.7 | 3.1 | 2.6 | 0.1622 | 4.5 |
| 4/17/2018 21:09 | 2.8 | 20.7 | 3.1 | 2.6 | 0.1629 | 4.7 |
| 4/17/2018 21:10 | 2.7 | 20.6 | 3.1 | 2.6 | 0.1555 | 4.7 |
| 4/17/2018 21:11 | 3.5 | 20.4 | 3.1 | 2.6 | 0.1721 | 4.7 |
| 4/17/2018 21:12 | 3.1 | 20.4 | 3.1 | 2.6 | 0.1546 | 4.6 |
| 4/17/2018 21:13 | 3.4 | 20.4 | 3.1 | 2.6 | 0.1667 | 4.5 |
| 4/17/2018 21:14 | 3.6 | 20.5 | 3.1 | 2.6 | 0.1618 | 4.5 |
| 4/17/2018 21:15 | 2.7 | 20.5 | 3.1 | 2.6 | 0.1628 | 4.6 |
| 4/17/2018 21:16 | 2.6 | 20.5 | 3.1 | 2.6 | 0.1766 | 4.5 |
| 4/17/2018 21:17 | 1.8 | 20.5 | 3.1 | 2.6 | 0.1571 | 4.4 |
| 4/17/2018 21:18 | 2.8 | 20.5 | 3.1 | 2.6 | 0.1675 | 4.4 |
| 4/17/2018 21:19 | 2.9 | 20.2 | 3.1 | 2.6 | 0.1656 | 4.5 |
| 4/17/2018 21:20 | 2.6 | 20.5 | 3.1 | 2.6 | 0.1528 | 4.5 |
| 4/17/2018 21:21 | 4.9 | 20.7 | 3.1 | 2.6 | 0.1638 | 4.6 |
| 4/17/2018 21:22 | 3   | 20.9 | 3.2 | 2.6 | 0.153  | 4.6 |
| 4/17/2018 21:23 | 2.5 | 20.7 | 3.1 | 2.6 | 0.1624 | 4.6 |

|                 |     |      |     |     |        |     |
|-----------------|-----|------|-----|-----|--------|-----|
| 4/17/2018 21:24 | 2.9 | 20.4 | 3.1 | 2.6 | 0.1632 | 4.6 |
| 4/17/2018 21:25 | 4   | 20.8 | 3.1 | 2.6 | 0.1598 | 4.7 |
| 4/17/2018 21:26 | 2.7 | 20.6 | 3.2 | 2.5 | 0.1663 | 4.6 |
| 4/17/2018 21:27 | 3.9 | 20.3 | 3.1 | 2.6 | 0.1588 | 4.6 |
| 4/17/2018 21:28 | 3.8 | 20.5 | 3.1 | 2.6 | 0.1639 | 4.5 |
| 4/17/2018 21:29 | 2.6 | 20.4 | 3.1 | 2.6 | 0.1657 | 4.4 |
| 4/17/2018 21:30 | 3.1 | 20.6 | 3.1 | 2.6 | 0.1579 | 4.4 |
| 4/17/2018 21:31 | 4.4 | 20.5 | 3.1 | 2.6 | 0.1595 | 4.4 |
| 4/17/2018 21:32 | 2.7 | 20.7 | 3.1 | 2.6 | 0.1533 | 4.3 |
| 4/17/2018 21:33 | 4   | 20.6 | 3.1 | 2.6 | 0.1589 | 4.3 |
| 4/17/2018 21:34 | 3.2 | 20.4 | 3.1 | 2.6 | 0.1606 | 4.2 |
| 4/17/2018 21:35 | 3.4 | 20.8 | 3.1 | 2.6 | 0.1452 | 4.2 |
| 4/17/2018 21:36 | 3.2 | 20.5 | 3.1 | 2.6 | 0.166  | 4.2 |
| 4/17/2018 21:37 | 4.5 | 20.4 | 3.1 | 2.6 | 0.1589 | 4.3 |
| 4/17/2018 21:38 | 2.7 | 20.4 | 3.1 | 2.6 | 0.1584 | 4.3 |
| 4/17/2018 21:39 | 2.7 | 20.5 | 3.1 | 2.6 | 0.1627 | 4.3 |
| 4/17/2018 21:40 | 2.9 | 20.4 | 3.1 | 2.6 | 0.1533 | 4.4 |
| 4/17/2018 21:41 | 3.8 | 20.2 | 3.1 | 2.6 | 0.1609 | 4.5 |
| 4/17/2018 21:42 | 3.5 | 20.4 | 3.1 | 2.6 | 0.1599 | 4.3 |
| 4/17/2018 21:43 | 3.5 | 20.5 | 3.1 | 2.6 | 0.1562 | 4.3 |
| 4/17/2018 21:44 | 3.2 | 20.5 | 3.1 | 2.6 | 0.1635 | 4.3 |
| 4/17/2018 21:45 | 1.9 | 20.7 | 3.1 | 2.6 | 0.1553 | 4.4 |
| 4/17/2018 21:46 | 4.5 | 20.4 | 3.1 | 2.6 | 0.1545 | 4.4 |
| 4/17/2018 21:47 | 2.9 | 20.5 | 3.1 | 2.6 | 0.1603 | 4.4 |
| 4/17/2018 21:48 | 3.5 | 20.4 | 3.1 | 2.6 | 0.1554 | 4.4 |
| 4/17/2018 21:49 | 4   | 20.4 | 3   | 2.6 | 0.1621 | 4.5 |
| 4/17/2018 21:50 | 3.5 | 20.2 | 2.7 | 2.6 | 0.1486 | 4.3 |
| 4/17/2018 21:51 | 2.3 | 20.3 | 2.6 | 2.6 | 0.1565 | 4.3 |
| 4/17/2018 21:52 | 2.9 | 20.6 | 2.6 | 2.6 | 0.1655 | 4.3 |
| 4/17/2018 21:53 | 4.4 | 20.4 | 2.6 | 2.6 | 0.152  | 4.4 |
| 4/17/2018 21:54 | 2.9 | 20.6 | 2.6 | 2.6 | 0.165  | 4.5 |
| 4/17/2018 21:55 | 2.7 | 20.6 | 2.7 | 2.5 | 0.1497 | 4.6 |
| 4/17/2018 21:56 | 2.9 | 20.6 | 2.6 | 2.5 | 0.1584 | 4.5 |
| 4/17/2018 21:57 | 2.1 | 20.3 | 2.6 | 2.5 | 0.1549 | 4.6 |
| 4/17/2018 21:58 | 2.6 | 20.6 | 2.6 | 2.5 | 0.157  | 4.5 |
| 4/17/2018 21:59 | 3.9 | 20.5 | 2.6 | 2.5 | 0.1596 | 4.5 |
| 4/17/2018 22:00 | 3.5 | 20.3 | 2.6 | 2.5 | 0.145  | 4.5 |
| 4/17/2018 22:01 | 2.8 | 20.2 | 2.6 | 2.5 | 0.1529 | 4.5 |
| 4/17/2018 22:02 | 4   | 20.7 | 2.6 | 2.5 | 0.1618 | 4.4 |
| 4/17/2018 22:03 | 1.3 | 20.3 | 2.6 | 2.5 | 0.1425 | 4.4 |
| 4/17/2018 22:04 | 2.9 | 20.5 | 2.6 | 2.6 | 0.1588 | 4.4 |
| 4/17/2018 22:05 | 3.2 | 20.5 | 2.6 | 2.6 | 0.1479 | 4.4 |
| 4/17/2018 22:06 | 2   | 20.2 | 2.6 | 2.6 | 0.1518 | 4.4 |
| 4/17/2018 22:07 |     | 20.5 | 2.6 | 2.6 | 0.16   | 4.3 |
| 4/17/2018 22:08 |     | 20.5 | 2.6 | 2.6 | 0.1455 | 4.3 |
| 4/17/2018 22:09 |     | 20.2 | 2.5 | 2.6 | 0.1712 | 4.3 |
| 4/17/2018 22:10 |     | 20.4 | 2.6 | 2.6 | 0.1554 | 4.4 |

|                 |     |      |     |     |        |     |
|-----------------|-----|------|-----|-----|--------|-----|
| 4/17/2018 22:11 |     | 20.4 | 2.6 | 2.6 | 0.1517 | 4.4 |
| 4/17/2018 22:12 |     | 20.6 | 2.6 | 2.6 | 0.1606 | 4.4 |
| 4/17/2018 22:13 |     | 20.5 | 2.6 | 2.6 | 0.1488 | 4.3 |
| 4/17/2018 22:14 |     | 20.5 | 2.6 | 2.6 | 0.1544 | 4.3 |
| 4/17/2018 22:15 |     | 20.3 | 2.6 | 2.6 | 0.1551 | 4.3 |
| 4/17/2018 22:16 | 3.5 | 20.5 | 2.6 | 2.6 | 0.1467 | 4.4 |
| 4/17/2018 22:17 | 2.9 | 20.5 | 2.6 | 2.6 | 0.1586 | 4.5 |
| 4/17/2018 22:18 | 6.6 | 20.5 | 2.6 | 2.5 | 0.1489 | 4.5 |
| 4/17/2018 22:19 | 4.6 | 20.7 | 2.6 | 2.5 | 0.1578 | 4.5 |
| 4/17/2018 22:20 | 2.7 | 20.6 | 2.6 | 2.5 | 0.1445 | 4.4 |
| 4/17/2018 22:21 | 3.7 | 20.2 | 2.6 | 2.5 | 0.1556 | 4.4 |
| 4/17/2018 22:22 | 3.5 | 20.5 | 2.6 | 2.5 | 0.157  | 4.5 |
| 4/17/2018 22:23 | 4.3 | 20.4 | 2.6 | 2.5 | 0.1485 | 4.6 |
| 4/17/2018 22:24 | 3   | 20.3 | 2.5 | 2.5 | 0.1602 | 4.5 |
| 4/17/2018 22:25 | 2.8 | 20.4 | 2.5 | 2.5 | 0.1421 | 4.5 |
| 4/17/2018 22:26 | 2.8 | 20.3 | 2.5 | 2.5 | 0.1507 | 4.7 |
| 4/17/2018 22:27 | 3   | 20.6 | 2.6 | 2.5 | 0.1575 | 4.7 |
| 4/17/2018 22:28 | 3.4 | 20.5 | 2.6 | 2.6 | 0.1533 | 4.7 |
| 4/17/2018 22:29 | 3.1 | 20.5 | 2.5 | 2.6 | 0.1574 | 4.5 |
| 4/17/2018 22:30 | 3.5 | 20.2 | 2.6 | 2.6 | 0.1626 | 4.4 |
| 4/17/2018 22:31 | 4   | 20.5 | 2.6 | 2.6 | 0.1487 | 4.4 |
| 4/17/2018 22:32 | 1.6 | 20.4 | 2.6 | 2.6 | 0.1619 | 4.5 |
| 4/17/2018 22:33 | 3.5 | 20.4 | 2.6 | 2.6 | 0.1498 | 4.5 |
| 4/17/2018 22:34 | 1.9 | 20.5 | 2.6 | 2.5 | 0.1632 | 4.5 |
| 4/17/2018 22:35 | 2.2 | 20.7 | 2.9 | 2.5 | 0.148  | 4.5 |
| 4/17/2018 22:36 | 4.1 | 20.6 | 2.8 | 2.5 | 0.1539 | 4.6 |
| 4/17/2018 22:37 | 2.3 | 20.6 | 2.7 | 2.5 | 0.1573 | 4.7 |
| 4/17/2018 22:38 | 2.3 | 20.4 | 2.8 | 2.5 | 0.1431 | 4.8 |
| 4/17/2018 22:39 | 2.6 | 20.4 | 3   | 2.5 | 0.1553 | 4.8 |
| 4/17/2018 22:40 | 4.3 | 20.5 | 2.8 | 2.5 | 0.1401 | 4.8 |
| 4/17/2018 22:41 | 3   | 20.4 | 2.8 | 2.5 | 0.1518 | 4.9 |
| 4/17/2018 22:42 | 1.9 | 20.3 | 2.9 | 2.5 | 0.1616 | 4.9 |
| 4/17/2018 22:43 | 3.2 | 20.3 | 2.9 | 2.5 | 0.1397 | 4.8 |
| 4/17/2018 22:44 | 3   | 20.2 | 3   | 2.5 | 0.1607 | 4.5 |
| 4/17/2018 22:45 | 3.4 | 20.3 | 3   | 2.5 | 0.1448 | 4.7 |
| 4/17/2018 22:46 | 4   | 20.4 | 2.9 | 2.5 | 0.1553 | 4.7 |
| 4/17/2018 22:47 | 1.7 | 20.3 | 3.1 | 2.5 | 0.1555 | 4.8 |
| 4/17/2018 22:48 | 2.2 | 20.4 | 2.8 | 2.5 | 0.1478 | 4.9 |
| 4/17/2018 22:49 | 1.9 | 20.1 | 2.7 | 2.6 | 0.1636 | 5   |
| 4/17/2018 22:50 | 3.4 | 20   | 2.7 | 2.6 | 0.142  | 5.1 |
| 4/17/2018 22:51 | 3.4 | 19.9 | 2.8 | 2.5 | 0.1595 | 5   |
| 4/17/2018 22:52 | 3.6 | 20.2 | 2.9 | 2.5 | 0.1514 | 5.1 |
| 4/17/2018 22:53 | 3.8 | 19.8 | 3.2 | 2.5 | 0.1461 | 5.1 |
| 4/17/2018 22:54 | 2.3 | 19.9 | 3.7 | 2.5 | 0.1591 | 5   |
| 4/17/2018 22:55 | 2.9 | 20   | 3.1 | 2.5 | 0.1417 | 5   |
| 4/17/2018 22:56 | 4.1 | 19.9 | 3.1 | 2.5 | 0.1563 | 5   |
| 4/17/2018 22:57 | 3.2 | 19.9 | 3.3 | 2.5 | 0.1523 | 5   |

|                 |     |      |     |     |        |     |
|-----------------|-----|------|-----|-----|--------|-----|
| 4/17/2018 22:58 | 3.5 | 20.2 | 3.4 | 2.4 | 0.1457 | 4.7 |
| 4/17/2018 22:59 | 2.6 | 20   | 3   | 2.4 | 0.1563 | 4.8 |
| 4/17/2018 23:00 | 3   | 20.1 | 3.4 | 2.5 | 0.1469 | 4.9 |
| 4/17/2018 23:01 | 3.6 | 20.1 | 3.2 | 2.5 | 0.1593 | 5   |
| 4/17/2018 23:02 | 1.2 | 20   | 3.3 | 2.5 | 0.1508 | 4.9 |
| 4/17/2018 23:03 | 3.9 | 19.8 | 3.6 | 2.5 | 0.1505 | 4.9 |
| 4/17/2018 23:04 | 2.1 | 20   | 3.1 | 2.5 | 0.1558 | 5   |
| 4/17/2018 23:05 | 4.2 | 19.9 | 3   | 2.5 | 0.1421 | 5.1 |
| 4/17/2018 23:06 | 2.2 | 19.9 | 3.1 | 2.6 | 0.1563 | 5.1 |
| 4/17/2018 23:07 | 3.3 | 19.9 | 3.3 | 2.6 | 0.1493 | 5.2 |
| 4/17/2018 23:08 | 3   | 19.7 | 3.8 | 2.6 | 0.1439 | 5.2 |
| 4/17/2018 23:09 | 3.2 | 19.7 | 4.1 | 2.5 | 0.1626 | 5.2 |
| 4/17/2018 23:10 | 4.2 | 20.2 | 3.9 | 2.5 | 0.1395 | 5.3 |
| 4/17/2018 23:11 | 3.2 | 19.8 | 4.1 | 2.5 | 0.149  | 5.2 |
| 4/17/2018 23:12 | 4   | 19.9 | 3.6 | 2.5 | 0.1443 | 5.1 |
| 4/17/2018 23:13 | 2.5 | 20   | 4   | 2.5 | 0.1489 | 5.1 |
| 4/17/2018 23:14 | 2.8 | 19.9 | 3.8 | 2.5 | 0.151  | 5.1 |
| 4/17/2018 23:15 | 2.8 | 19.8 | 4.4 | 2.5 | 0.1477 | 5.3 |
| 4/17/2018 23:16 | 2.6 | 19.8 | 3.8 | 2.5 | 0.1589 | 5.1 |
| 4/17/2018 23:17 | 2.6 | 19.7 | 4.1 | 2.5 | 0.1471 | 5   |
| 4/17/2018 23:18 | 2.3 | 19.9 | 4.2 | 2.5 | 0.1571 | 4.9 |
| 4/17/2018 23:19 | 3.4 | 19.7 | 4.2 | 2.5 | 0.1514 | 5   |
| 4/17/2018 23:20 | 2.4 | 19.5 | 3.9 | 2.5 | 0.1534 | 5.1 |
| 4/17/2018 23:21 | 2.4 | 20   | 3.7 | 2.6 | 0.1573 | 5.2 |
| 4/17/2018 23:22 | 2   | 19.9 | 3.6 | 2.6 | 0.1368 | 5.1 |
| 4/17/2018 23:23 | 3   | 19.5 | 3.8 | 2.6 | 0.1612 | 5   |
| 4/17/2018 23:24 | 3.3 | 19.7 | 4   | 2.6 | 0.1522 | 5.2 |
| 4/17/2018 23:25 | 2.3 | 19.6 | 4.4 | 2.6 | 0.1473 | 5.2 |
| 4/17/2018 23:26 | 2.7 | 19.5 | 4.7 | 2.6 | 0.1554 | 5.3 |
| 4/17/2018 23:27 | 2.3 | 19.6 | 4.7 | 2.6 | 0.1451 | 5.4 |
| 4/17/2018 23:28 | 3.3 | 19.8 | 4.8 | 2.6 | 0.1526 | 5.4 |
| 4/17/2018 23:29 | 0.6 | 19.7 | 4.4 | 2.5 | 0.1466 | 5.3 |
| 4/17/2018 23:30 | 2.8 | 19.9 | 4.5 | 2.5 | 0.1504 | 5.2 |
| 4/17/2018 23:31 | 3.6 | 19.9 | 4.6 | 2.5 | 0.1562 | 5.2 |
| 4/17/2018 23:32 | 3.2 | 19.8 | 4.9 | 2.5 | 0.1441 | 5   |
| 4/17/2018 23:33 | 2.7 | 19.8 | 4.4 | 2.5 | 0.1554 | 5.1 |
| 4/17/2018 23:34 | 3.2 | 19.8 | 4.7 | 2.5 | 0.1444 | 5.1 |
| 4/17/2018 23:35 | 2.5 | 19.6 | 4.9 | 2.5 | 0.1481 | 5   |
| 4/17/2018 23:36 | 3.2 | 19.8 | 4.8 | 2.5 | 0.1551 | 4.8 |
| 4/17/2018 23:37 | 2.3 | 19.7 | 4.5 | 2.6 | 0.1468 | 4.6 |
| 4/17/2018 23:38 | 2.4 | 19.9 | 4.2 | 2.6 | 0.1614 | 4.7 |
| 4/17/2018 23:39 | 3.5 | 19.7 | 4.3 | 2.6 | 0.1512 | 4.8 |
| 4/17/2018 23:40 | 1.4 | 19.7 | 4.6 | 2.6 | 0.1505 | 4.9 |
| 4/17/2018 23:41 | 3.8 | 19.7 | 4.9 | 2.6 | 0.1554 | 4.8 |
| 4/17/2018 23:42 | 2.2 | 19.7 | 4.9 | 2.6 | 0.1461 | 4.6 |
| 4/17/2018 23:43 | 3.5 | 19.6 | 4.9 | 2.6 | 0.1613 | 4.5 |
| 4/17/2018 23:44 | 2.7 | 19.8 | 5.1 | 2.6 | 0.1468 | 4.3 |

|                 |     |      |     |     |        |     |
|-----------------|-----|------|-----|-----|--------|-----|
| 4/17/2018 23:45 | 3.2 | 19.7 | 5.1 | 2.6 | 0.1572 | 4.4 |
| 4/17/2018 23:46 | 3.8 | 19.6 | 5   | 2.6 | 0.1523 | 4.7 |
| 4/17/2018 23:47 | 2   | 19.8 | 4.9 | 2.6 | 0.1522 | 4.8 |
| 4/17/2018 23:48 | 2.3 | 20   | 4.7 | 2.6 | 0.1596 | 5   |
| 4/17/2018 23:49 | 4   | 19.6 | 4.8 | 2.6 | 0.1416 | 5   |
| 4/17/2018 23:50 | 3   | 19.6 | 4.8 | 2.6 | 0.1546 | 5   |
| 4/17/2018 23:51 | 1.2 | 19.6 | 4.8 | 2.6 | 0.159  | 5.1 |
| 4/17/2018 23:52 | 3.5 | 19.8 | 4.8 | 2.6 | 0.1497 | 5.3 |
| 4/17/2018 23:53 | 2.9 | 19.6 | 4.4 | 2.6 | 0.1566 | 5.2 |
| 4/17/2018 23:54 | 3.4 | 19.6 | 4.2 | 2.7 | 0.1421 | 5.2 |
| 4/17/2018 23:55 | 3.1 | 19.7 | 4.4 | 2.7 | 0.1571 | 5.2 |
| 4/17/2018 23:56 | 2   | 19.6 | 4.6 | 2.7 | 0.1572 | 5.1 |
| 4/17/2018 23:57 | 2   | 19.7 | 4.9 | 2.7 | 0.1493 | 5   |
| 4/17/2018 23:58 | 2.6 | 19.9 | 5.1 | 2.7 | 0.1586 | 4.7 |
| 4/17/2018 23:59 | 3.8 | 19.6 | 4.9 | 2.7 | 0.1471 | 4.7 |
| 4/18/2018 0:00  | 2.3 | 19.7 | 4.9 | 2.7 | 0.1579 | 4.6 |
| 4/18/2018 0:01  | 3   | 19.7 | 4.9 | 2.7 | 0.1519 | 4.5 |
| 4/18/2018 0:02  | 2.5 | 19.9 | 4.9 | 2.6 | 0.1519 | 4.6 |
| 4/18/2018 0:03  | 2.3 | 19.8 | 4.6 | 2.6 | 0.1602 | 4.5 |
| 4/18/2018 0:04  | 1.6 | 19.6 | 4.7 | 2.6 | 0.1531 | 4.6 |
| 4/18/2018 0:05  | 1.9 | 19.6 | 4.6 | 2.6 | 0.1579 | 4.7 |
| 4/18/2018 0:06  | 4   | 19.5 | 4.5 | 2.7 | 0.1576 | 4.8 |
| 4/18/2018 0:07  | 1.8 | 19.8 | 4.5 | 2.7 | 0.148  | 4.8 |
| 4/18/2018 0:08  | 3   | 19.5 | 4.5 | 2.7 | 0.1646 | 4.9 |
| 4/18/2018 0:09  | 2.4 | 19.5 | 4.5 | 2.7 | 0.1497 | 5.1 |
| 4/18/2018 0:10  | 3.2 | 19.4 | 4.5 | 2.7 | 0.1561 | 5.1 |
| 4/18/2018 0:11  | 2.5 | 19.7 | 4.6 | 2.8 | 0.1513 | 4.9 |
| 4/18/2018 0:12  | 2.8 | 19.5 | 4.9 | 2.7 | 0.1494 | 4.8 |
| 4/18/2018 0:13  | 2.3 | 19.6 | 4.8 | 2.7 | 0.1591 | 4.9 |
| 4/18/2018 0:14  | 2.7 | 19.7 | 4.9 | 2.7 | 0.1492 | 4.8 |
| 4/18/2018 0:15  | 2.7 | 19.7 | 4.9 | 2.7 | 0.1575 | 4.8 |
| 4/18/2018 0:16  | 1.6 | 19.7 | 4.7 | 2.7 | 0.1623 | 4.9 |
| 4/18/2018 0:17  | 3   | 20   | 4.9 | 2.7 | 0.1543 | 5.1 |
| 4/18/2018 0:18  | 2   | 19.9 | 4.8 | 2.7 | 0.1607 | 4.9 |
| 4/18/2018 0:19  | 3   | 20   | 4.9 | 2.7 | 0.1492 | 4.9 |
| 4/18/2018 0:20  | 3.9 | 19.7 | 4.8 | 2.6 | 0.1612 | 4.9 |
| 4/18/2018 0:21  | 2.9 | 19.8 | 4.8 | 2.6 | 0.1605 | 4.8 |
| 4/18/2018 0:22  | 2.6 | 19.8 | 4.9 | 2.6 | 0.1534 | 4.8 |
| 4/18/2018 0:23  | 2.9 | 19.7 | 4.8 | 2.7 | 0.1608 | 5   |
| 4/18/2018 0:24  | 1.1 | 19.7 | 4.9 | 2.7 | 0.1505 | 5   |
| 4/18/2018 0:25  | 3.4 | 19.9 | 4.8 | 2.6 | 0.1639 | 5.1 |
| 4/18/2018 0:26  | 2.9 | 19.7 | 4.8 | 2.6 | 0.1584 | 5.2 |
| 4/18/2018 0:27  | 2.3 | 19.8 | 4.5 | 2.6 | 0.1505 | 5.1 |
| 4/18/2018 0:28  | 2.8 | 19.5 | 4.6 | 2.7 | 0.1627 | 2.8 |
| 4/18/2018 0:29  | 2.7 | 20   | 4.8 | 2.7 | 0.1507 | 1.3 |
| 4/18/2018 0:30  | 2.3 | 19.6 | 5   | 2.7 | 0.1626 | 1.4 |
| 4/18/2018 0:31  | 2.8 | 19.9 | 5   | 2.6 | 0.16   | 1.4 |

|                |     |      |     |     |        |     |
|----------------|-----|------|-----|-----|--------|-----|
| 4/18/2018 0:32 | 2.5 | 19.7 | 5   | 2.6 | 0.1573 | 1.4 |
| 4/18/2018 0:33 | 2.7 | 19.6 | 4.9 | 2.6 | 0.163  | 1.4 |
| 4/18/2018 0:34 | 2.4 | 19.8 | 5   | 2.7 | 0.1536 | 1.4 |
| 4/18/2018 0:35 | 3   | 19.6 | 4.9 | 2.6 | 0.159  | 1.7 |
| 4/18/2018 0:36 | 2.3 | 19.7 | 4.8 | 2.6 | 0.1625 | 2.1 |
| 4/18/2018 0:37 | 3.2 | 19.8 | 4.9 | 2.6 | 0.1567 | 2.6 |
| 4/18/2018 0:38 | 1.8 | 19.7 | 4.9 | 2.7 | 0.1627 | 3   |
| 4/18/2018 0:39 | 2.7 | 19.8 | 4.8 | 2.7 | 0.151  | 2.8 |
| 4/18/2018 0:40 | 3.9 | 19.8 | 4.8 | 2.7 | 0.1676 | 2.6 |
| 4/18/2018 0:41 | 1.7 | 19.6 | 4.8 | 2.7 | 0.1619 | 3.1 |
| 4/18/2018 0:42 | 2.5 | 19.8 | 4.8 | 2.8 | 0.1576 | 3.3 |
| 4/18/2018 0:43 | 2.1 | 19.7 | 4.9 | 2.8 | 0.1639 | 3.5 |
| 4/18/2018 0:44 | 1.7 | 19.4 | 5   | 2.8 | 0.1506 | 3.7 |
| 4/18/2018 0:45 | 1.8 | 19.5 | 5.3 | 2.8 | 0.1696 | 3.9 |
| 4/18/2018 0:46 | 2   | 19.6 | 5.1 | 2.8 | 0.1576 | 4   |
| 4/18/2018 0:47 | 3.1 | 19.7 | 5.3 | 2.7 | 0.1554 | 4.1 |
| 4/18/2018 0:48 | 2.4 | 19.6 | 5.3 | 2.7 | 0.1659 | 4.2 |
| 4/18/2018 0:49 | 2.6 | 19.8 | 5.4 | 2.7 | 0.1559 | 4.3 |
| 4/18/2018 0:50 | 4.1 | 19.4 | 5.5 | 2.7 | 0.157  | 4.4 |
| 4/18/2018 0:51 |     | 19.4 | 5.3 | 2.7 | 0.1578 | 4.5 |
| 4/18/2018 0:52 |     | 19.6 | 5.3 | 2.7 | 0.1564 | 4.6 |
| 4/18/2018 0:53 |     | 19.6 | 5   | 2.7 | 0.1662 | 4.6 |
| 4/18/2018 0:54 | 4.4 | 19.4 | 4.9 | 2.7 | 0.1537 | 4.7 |
| 4/18/2018 0:55 | 1.2 | 19.2 | 4.9 | 2.7 | 0.1677 | 4.7 |
| 4/18/2018 0:56 |     | 19.3 | 4.9 | 2.7 | 0.1566 | 4.8 |
| 4/18/2018 0:57 | 1.9 | 19.5 | 4.9 | 2.7 | 0.1542 | 4.8 |
| 4/18/2018 0:58 |     | 19.5 | 5   | 2.7 | 0.1717 | 4.8 |
| 4/18/2018 0:59 | 2.5 | 19.6 | 5.3 | 2.7 | 0.1552 | 4.9 |
| 4/18/2018 1:00 | 6.1 | 19.5 | 5.4 | 2.7 | 0.1663 | 4.8 |
| 4/18/2018 1:01 | 2.4 | 19.8 | 5.4 | 2.7 | 0.1575 | 4.8 |
| 4/18/2018 1:02 | 3.3 | 19.5 | 5.7 | 2.7 | 0.158  | 4.9 |
| 4/18/2018 1:03 | 4.1 | 19.6 | 5.4 | 2.7 | 0.1674 | 4.8 |
| 4/18/2018 1:04 | 2.8 | 19.7 | 5.2 | 2.7 | 0.1518 | 4.8 |
| 4/18/2018 1:05 |     | 19.7 | 5.1 | 2.7 | 0.1709 | 4.8 |
| 4/18/2018 1:06 | 4.2 | 19.5 | 5.2 | 2.7 | 0.1611 | 4.8 |
| 4/18/2018 1:07 | 3   | 19.2 | 5.2 | 2.7 | 0.1612 | 4.8 |
| 4/18/2018 1:08 | 3.4 | 19.5 | 5.2 | 2.7 | 0.1676 | 4.8 |
| 4/18/2018 1:09 | 2.4 | 19.3 | 5.2 | 2.8 | 0.1555 | 4.8 |
| 4/18/2018 1:10 | 2.6 | 19.3 | 5.2 | 2.8 | 0.1714 | 4.9 |
| 4/18/2018 1:11 | 2.8 | 19.4 | 5.1 | 2.8 | 0.1594 | 4.9 |
| 4/18/2018 1:12 | 1.9 | 19.8 | 5.4 | 2.8 | 0.1601 | 4.9 |
| 4/18/2018 1:13 | 4   | 19.5 | 5.7 | 2.8 | 0.1626 | 4.9 |
| 4/18/2018 1:14 | 2   | 19.3 | 5.7 | 2.8 | 0.1556 | 4.9 |
| 4/18/2018 1:15 | 3.4 | 19.5 | 5.6 | 2.8 | 0.1638 | 4.9 |
| 4/18/2018 1:16 | 2.8 | 19.7 | 5.7 | 2.8 | 0.1659 | 5   |
| 4/18/2018 1:17 | 1.8 | 19.6 | 5.4 | 2.8 | 0.1589 | 4.9 |
| 4/18/2018 1:18 | 1.6 | 19.5 | 5.5 | 2.8 | 0.1662 | 4.8 |

|                |     |      |     |     |        |     |
|----------------|-----|------|-----|-----|--------|-----|
| 4/18/2018 1:19 | 3.1 | 19.6 | 5.6 | 2.8 | 0.153  | 4.8 |
| 4/18/2018 1:20 | 1.4 | 19.6 | 5.4 | 2.8 | 0.1582 | 4.4 |
| 4/18/2018 1:21 | 2.9 | 19.8 | 5.4 | 2.8 | 0.1549 | 3.9 |
| 4/18/2018 1:22 | 2.5 | 19.5 | 5.4 | 2.8 | 0.1614 | 3.3 |
| 4/18/2018 1:23 | 3.1 | 19.3 | 5.4 | 2.8 | 0.1627 | 2.8 |
| 4/18/2018 1:24 | 3   | 19.5 | 5.3 | 2.8 | 0.1567 | 3.1 |
| 4/18/2018 1:25 | 2.3 | 19.7 | 5.4 | 2.8 | 0.1586 | 3.3 |
| 4/18/2018 1:26 | 0.9 | 19.4 | 5.5 | 2.8 | 0.1589 | 3.4 |
| 4/18/2018 1:27 | 2.9 | 19.5 | 5.6 | 2.8 | 0.1546 | 3.5 |
| 4/18/2018 1:28 | 2.5 | 19.4 | 5.6 | 2.8 | 0.1649 | 3.8 |
| 4/18/2018 1:29 | 3.6 | 19.5 | 5.5 | 2.8 | 0.1598 | 4   |
| 4/18/2018 1:30 | 3   | 19.5 | 5.4 | 2.8 | 0.1714 | 4.1 |
| 4/18/2018 1:31 | 3.3 | 19.6 | 5.4 | 2.8 | 0.1623 | 4.2 |
| 4/18/2018 1:32 | 2   | 19.4 | 5.3 | 2.8 | 0.161  | 4.3 |
| 4/18/2018 1:33 | 1.9 | 19.5 | 5.3 | 2.8 | 0.1671 | 4.4 |
| 4/18/2018 1:34 | 2.2 | 19.5 | 5.3 | 2.8 | 0.1652 | 4.5 |
| 4/18/2018 1:35 | 1.4 | 19.5 | 5.2 | 2.8 | 0.1579 | 4.5 |
| 4/18/2018 1:36 | 3.5 | 19.6 | 5.3 | 2.8 | 0.168  | 3.2 |
| 4/18/2018 1:37 | 3.2 | 19.4 | 5.3 | 2.8 | 0.153  | 1.6 |
| 4/18/2018 1:38 | 2.1 | 19.2 | 5.4 | 2.8 | 0.1739 | 2.2 |
| 4/18/2018 1:39 | 2.6 | 19.5 | 5.6 | 2.8 | 0.1526 | 2.4 |
| 4/18/2018 1:40 | 2.7 | 19.5 | 5.5 | 2.8 | 0.159  | 2.6 |
| 4/18/2018 1:41 | 2   | 19.4 | 5.3 | 2.8 | 0.159  | 3   |
| 4/18/2018 1:42 | 2.7 | 19.6 | 5.4 | 2.8 | 0.1464 | 3.2 |
| 4/18/2018 1:43 | 2.9 | 19.8 | 5.6 | 2.7 | 0.1689 | 3.3 |
| 4/18/2018 1:44 | 3.6 | 19.6 | 5.5 | 2.7 | 0.1588 | 3.3 |
| 4/18/2018 1:45 | 2.6 | 19.7 | 5.4 | 2.7 | 0.1766 | 3.4 |
| 4/18/2018 1:46 | 4   | 19.6 | 5.3 | 2.7 | 0.1631 | 3.5 |
| 4/18/2018 1:47 | 2.6 | 19.4 | 5.3 | 2.8 | 0.1547 | 3.6 |
| 4/18/2018 1:48 | 3.4 | 19.8 | 5.2 | 2.8 | 0.1663 | 3.6 |
| 4/18/2018 1:49 | 2.8 | 19.5 | 5.2 | 2.8 | 0.1477 | 3.7 |
| 4/18/2018 1:50 | 1.7 | 19.4 | 5.2 | 2.8 | 0.1586 | 3.8 |
| 4/18/2018 1:51 | 2.8 | 19.4 | 5.2 | 2.9 | 0.1615 | 3.9 |
| 4/18/2018 1:52 | 2.7 | 19.5 | 5.2 | 2.9 | 0.1524 | 3.8 |
| 4/18/2018 1:53 | 2   | 19.4 | 5.2 | 2.9 | 0.1674 | 3.8 |
| 4/18/2018 1:54 | 2.4 | 19.3 | 5.4 | 2.8 | 0.154  | 3.5 |
| 4/18/2018 1:55 | 3.4 | 19.5 | 5.5 | 2.8 | 0.1652 | 3.5 |
| 4/18/2018 1:56 | 3   | 19.6 | 5.5 | 2.8 | 0.1657 | 3.5 |
| 4/18/2018 1:57 | 2.3 | 19.3 | 5.6 | 2.8 | 0.1585 | 3.6 |
| 4/18/2018 1:58 | 3.2 | 19.5 | 5.5 | 2.7 | 0.1661 | 3.7 |
| 4/18/2018 1:59 | 1.9 | 19.2 | 5.7 | 2.7 | 0.1601 | 3.8 |
| 4/18/2018 2:00 | 3.3 | 19.4 | 5.3 | 2.7 | 0.1695 | 3.7 |
| 4/18/2018 2:01 | 1.9 | 19.5 | 5.3 | 2.7 | 0.1702 | 3.6 |
| 4/18/2018 2:02 | 2.3 | 19.5 | 5.2 | 2.8 | 0.158  | 3.7 |
| 4/18/2018 2:03 | 2.5 | 19.4 | 5.2 | 2.8 | 0.1683 | 3.7 |
| 4/18/2018 2:04 | 1.9 | 19.3 | 5.2 | 2.8 | 0.1601 | 3.7 |
| 4/18/2018 2:05 | 2.7 | 19.2 | 5.3 | 2.8 | 0.1603 | 3.7 |



|                |     |      |     |     |        |     |
|----------------|-----|------|-----|-----|--------|-----|
| 4/18/2018 2:06 | 2.3 | 19.5 | 5.7 | 2.8 | 0.1694 | 3.8 |
| 4/18/2018 2:07 | 3.2 | 19.3 | 6   | 2.8 | 0.1601 | 3.8 |
| 4/18/2018 2:08 | 3   | 19.2 | 6   | 2.8 | 0.166  | 3.8 |
| 4/18/2018 2:09 | 2.6 | 19.3 | 5.5 | 2.8 | 0.1526 | 3.9 |
| 4/18/2018 2:10 | 2   | 19.3 | 5.6 | 2.8 | 0.1613 | 3.9 |
| 4/18/2018 2:11 | 3.5 | 19.5 | 5.8 | 2.8 | 0.1694 | 3.9 |
| 4/18/2018 2:12 | 1.9 | 19.3 | 6.1 | 2.8 | 0.1571 | 3.9 |
| 4/18/2018 2:13 | 2.7 | 19.5 | 6.1 | 2.8 | 0.1717 | 3.9 |
| 4/18/2018 2:14 | 2.2 | 19.3 | 6   | 2.7 | 0.1542 | 3.9 |
| 4/18/2018 2:15 | 2.7 | 19.6 | 6   | 2.7 | 0.1642 | 3.9 |
| 4/18/2018 2:16 | 3.2 | 19.4 | 5.6 | 2.7 | 0.1625 | 3.9 |
| 4/18/2018 2:17 | 4   | 19.2 | 5.5 | 2.7 | 0.1583 | 3.8 |
| 4/18/2018 2:18 | 2.5 | 19.2 | 5.5 | 2.7 | 0.1667 | 3.9 |
| 4/18/2018 2:19 | 2.1 | 19.1 | 5.8 | 2.7 | 0.1585 | 3.9 |
| 4/18/2018 2:20 | 2.1 | 19.2 | 6   | 2.7 | 0.162  | 3.9 |
| 4/18/2018 2:21 | 2.5 | 19.4 | 5.8 | 2.8 | 0.1652 | 3.8 |
| 4/18/2018 2:22 | 3.7 | 19.3 | 6   | 2.8 | 0.1556 | 3.9 |
| 4/18/2018 2:23 | 3   | 19.1 | 6.5 | 2.8 | 0.1662 | 3.9 |
| 4/18/2018 2:24 | 2.1 | 19.4 | 5.9 | 2.8 | 0.1611 | 4   |
| 4/18/2018 2:25 | 1.2 | 19.3 | 5.8 | 2.8 | 0.1583 | 3.8 |
| 4/18/2018 2:26 | 1.4 | 19.3 | 6.1 | 2.7 | 0.1643 | 3.8 |
| 4/18/2018 2:27 | 2.5 | 19   | 6   | 2.7 | 0.1537 | 3.9 |
| 4/18/2018 2:28 | 3.8 | 19.3 | 5.8 | 2.7 | 0.1611 | 4   |
| 4/18/2018 2:29 | 1.4 | 19.2 | 5.6 | 2.7 | 0.1584 | 3.9 |
| 4/18/2018 2:30 | 1.5 | 19.1 | 5.7 | 2.7 | 0.1611 | 4   |
| 4/18/2018 2:31 | 2.3 | 19.1 | 5.7 | 2.8 | 0.1717 | 4   |
| 4/18/2018 2:32 | 2   | 19.4 | 5.8 | 2.8 | 0.1589 | 4   |
| 4/18/2018 2:33 | 2.2 | 19.2 | 6.1 | 2.8 | 0.1651 | 3.8 |
| 4/18/2018 2:34 | 1.8 | 19.2 | 6.6 | 2.8 | 0.1676 | 3.7 |
| 4/18/2018 2:35 | 3.1 | 19.4 | 6.2 | 2.8 | 0.1631 | 3.7 |
| 4/18/2018 2:36 | 2.5 | 19.1 | 6.1 | 2.8 | 0.1734 | 3.7 |
| 4/18/2018 2:37 | 0.7 | 19.1 | 6.3 | 2.7 | 0.1556 | 3.7 |
| 4/18/2018 2:38 | 2.4 | 19   | 5.8 | 2.7 | 0.1678 | 3.8 |
| 4/18/2018 2:39 | 2.6 | 18.9 | 6   | 2.7 | 0.1606 | 3.8 |
| 4/18/2018 2:40 | 1.6 | 19.2 | 6.1 | 2.7 | 0.162  | 3.9 |
| 4/18/2018 2:41 | 2.8 | 19   | 6.3 | 2.8 | 0.1779 | 3.9 |
| 4/18/2018 2:42 | 3.1 | 18.9 | 6.9 | 2.8 | 0.1561 | 3.8 |
| 4/18/2018 2:43 | 2.7 | 18.9 | 6.1 | 2.8 | 0.1693 | 3.7 |
| 4/18/2018 2:44 | 1.6 | 19   | 6.9 | 2.8 | 0.1625 | 3.7 |
| 4/18/2018 2:45 | 1.9 | 19.1 | 6.6 | 2.8 | 0.1665 | 3.8 |
| 4/18/2018 2:46 | 2.9 | 19   | 6.9 | 2.8 | 0.1727 | 4   |
| 4/18/2018 2:47 | 2.7 | 18.9 | 6.5 | 2.8 | 0.1613 | 4.1 |
| 4/18/2018 2:48 | 1.8 | 19.2 | 6.9 | 2.8 | 0.1725 | 4   |
| 4/18/2018 2:49 | 2.6 | 19.2 | 7.1 | 2.8 | 0.1704 | 4   |
| 4/18/2018 2:50 | 1.4 | 18.6 | 7.5 | 2.8 | 0.1639 | 4.1 |
| 4/18/2018 2:51 | 2   | 19   | 7.1 | 2.8 | 0.1747 | 4.2 |
| 4/18/2018 2:52 | 2.5 | 19   | 7.2 | 2.8 | 0.1642 | 4.3 |

|                |     |      |     |     |        |     |
|----------------|-----|------|-----|-----|--------|-----|
| 4/18/2018 2:53 | 1.6 | 19   | 7.1 | 2.8 | 0.1615 | 4.2 |
| 4/18/2018 2:54 | 1.4 | 19   | 7.1 | 2.9 | 0.1701 | 4.2 |
| 4/18/2018 2:55 | 0.7 | 19.2 | 6.8 | 2.9 | 0.1621 | 4.1 |
| 4/18/2018 2:56 | 2   | 19.1 | 6.9 | 2.9 | 0.1725 | 4.2 |
| 4/18/2018 2:57 | 2.2 | 18.8 | 7.3 | 2.9 | 0.1543 | 4.2 |
| 4/18/2018 2:58 | 2.2 | 19   | 7   | 2.9 | 0.1733 | 4.1 |
| 4/18/2018 2:59 | 2.2 | 19.1 | 6.7 | 2.9 | 0.1714 | 4.2 |
| 4/18/2018 3:00 | 1.1 | 18.7 | 7.1 | 2.9 | 0.1598 | 4.1 |
| 4/18/2018 3:01 | 1.7 | 18.9 | 6.9 | 2.9 | 0.1772 | 4.2 |
| 4/18/2018 3:02 | 2   | 18.9 | 6.9 | 2.9 | 0.1642 | 4.4 |
| 4/18/2018 3:03 | 1.4 | 18.9 | 7.3 | 2.9 | 0.1671 | 4.3 |
| 4/18/2018 3:04 | 2.6 | 19   | 7.2 | 2.9 | 0.1731 | 4.2 |
| 4/18/2018 3:05 | 2.3 | 19   | 7.8 | 2.9 | 0.1627 | 4.2 |
| 4/18/2018 3:06 | 2.5 | 19.1 | 7.3 | 2.9 | 0.1746 | 4.2 |
| 4/18/2018 3:07 | 1.9 | 19.1 | 7.1 | 2.9 | 0.1663 | 4.2 |
| 4/18/2018 3:08 | 2.2 | 18.9 | 6.9 | 2.9 | 0.1714 | 4.2 |
| 4/18/2018 3:09 | 1.2 | 18.9 | 7.1 | 2.9 | 0.1689 | 4.3 |
| 4/18/2018 3:10 | 2.4 | 19.1 | 7.1 | 2.9 | 0.1593 | 4.3 |
| 4/18/2018 3:11 | 1.7 | 18.9 | 7.5 | 2.9 | 0.1797 | 4.3 |
| 4/18/2018 3:12 | 2.6 | 18.9 | 7   | 2.9 | 0.162  | 4.4 |
| 4/18/2018 3:13 | 1   | 19   | 6.9 | 2.9 | 0.1651 | 4.4 |
| 4/18/2018 3:14 | 1.7 | 19   | 7.1 | 2.9 | 0.1764 | 4.4 |
| 4/18/2018 3:15 | 1.6 | 19   | 6.9 | 2.9 | 0.1603 | 4.4 |
| 4/18/2018 3:16 | 1.9 | 19.2 | 7   | 2.9 | 0.1718 | 4.4 |
| 4/18/2018 3:17 | 2   | 19.1 | 7   | 2.9 | 0.1669 | 4.4 |
| 4/18/2018 3:18 | 2.1 | 18.8 | 6.8 | 2.9 | 0.1695 | 4.4 |
| 4/18/2018 3:19 | 2.1 | 19   | 7   | 2.9 | 0.1701 | 4.5 |
| 4/18/2018 3:20 | 2.4 | 19.1 | 6.8 | 2.9 | 0.1625 | 4.5 |
| 4/18/2018 3:21 | 2.2 | 19   | 6.8 | 2.9 | 0.1721 | 4.5 |
| 4/18/2018 3:22 | 1.9 | 19.1 | 7   | 2.9 | 0.1665 | 4.5 |
| 4/18/2018 3:23 | 2.5 | 19.1 | 7   | 2.9 | 0.1661 | 4.5 |
| 4/18/2018 3:24 | 3.2 | 19.1 | 6.9 | 2.9 | 0.1747 | 4.6 |
| 4/18/2018 3:25 | 1.6 | 18.8 | 6.7 | 3   | 0.1552 | 4.6 |
| 4/18/2018 3:26 | 1.6 | 19   | 7.1 | 2.9 | 0.1712 | 4.6 |
| 4/18/2018 3:27 | 3.1 | 19.2 | 6.7 | 2.9 | 0.1633 | 4.5 |
| 4/18/2018 3:28 | 3.4 | 19   | 6.7 | 2.9 | 0.1612 | 4.6 |
| 4/18/2018 3:29 | 1.7 | 19   | 7   | 2.9 | 0.1774 | 4.5 |
| 4/18/2018 3:30 | 2.4 | 19   | 7.1 | 2.9 | 0.1654 | 4.4 |
| 4/18/2018 3:31 | 1.7 | 19.1 | 6.8 | 2.9 | 0.1749 | 4.4 |
| 4/18/2018 3:32 | 1.5 | 19.2 | 6.5 | 2.9 | 0.1642 | 4.4 |
| 4/18/2018 3:33 | 2.3 | 18.9 | 7   | 2.9 | 0.1632 | 4.4 |
| 4/18/2018 3:34 | 3.2 | 19.1 | 7.2 | 2.9 | 0.1749 | 4.5 |
| 4/18/2018 3:35 | 3.1 | 18.8 | 7   | 2.9 | 0.1653 | 4.4 |
| 4/18/2018 3:36 | 2.6 | 18.9 | 6.7 | 2.9 | 0.159  | 4.5 |
| 4/18/2018 3:37 | 2.9 | 18.7 | 6.8 | 2.9 | 0.1755 | 4.4 |
| 4/18/2018 3:38 | 3.6 | 18.8 | 7   | 3   | 0.1671 | 4.4 |
| 4/18/2018 3:39 | 2.6 | 19   | 6.9 | 3   | 0.1713 | 4.3 |

|                |     |      |     |     |        |     |
|----------------|-----|------|-----|-----|--------|-----|
| 4/18/2018 3:40 | 2.8 | 19   | 7.1 | 3   | 0.1672 | 4.3 |
| 4/18/2018 3:41 | 1.1 | 19   | 7.2 | 3   | 0.1642 | 4.2 |
| 4/18/2018 3:42 | 1.4 | 19   | 7.1 | 3   | 0.1741 | 4.2 |
| 4/18/2018 3:43 | 1.7 | 18.8 | 7.2 | 3.1 | 0.1583 | 4.3 |
| 4/18/2018 3:44 | 1.7 | 19   | 7   | 3.1 | 0.175  | 4.3 |
| 4/18/2018 3:45 | 3.4 | 19   | 7.1 | 3.1 | 0.1615 | 4.3 |
| 4/18/2018 3:46 | 1.6 | 18.7 | 7.5 | 3.1 | 0.1675 | 4.4 |
| 4/18/2018 3:47 | 2.1 | 19   | 7.5 | 3.1 | 0.1728 | 4.4 |
| 4/18/2018 3:48 | 2.4 | 18.7 | 7.6 | 3.1 | 0.1621 | 4.5 |
| 4/18/2018 3:49 | 3.4 | 18.9 | 7.3 | 3.2 | 0.1757 | 4.4 |
| 4/18/2018 3:50 | 1.2 | 18.7 | 7.7 | 3.2 | 0.1749 | 4.5 |
| 4/18/2018 3:51 | 2.8 | 18.6 | 7.8 | 3.2 | 0.1716 | 4.4 |
| 4/18/2018 3:52 | 2.2 | 18.7 | 7.7 | 3.2 | 0.1754 | 4.3 |
| 4/18/2018 3:53 | 2.7 | 18.7 | 8.1 | 3.3 | 0.1648 | 4.3 |
| 4/18/2018 3:54 | 2.2 | 18.8 | 8   | 3.3 | 0.1762 | 4.3 |
| 4/18/2018 3:55 | 2.1 | 18.8 | 8   | 3.3 | 0.1663 | 4.3 |
| 4/18/2018 3:56 | 1.5 | 18.4 | 8.2 | 3.4 | 0.1789 | 4.3 |
| 4/18/2018 3:57 | 1.6 | 18.4 | 8.3 | 3.4 | 0.1823 | 4.3 |
| 4/18/2018 3:58 | 1.5 | 18.6 | 7.4 | 3.4 | 0.1721 | 4.2 |
| 4/18/2018 3:59 | 1.6 | 18.7 | 7.7 | 3.4 | 0.1809 | 4.1 |
| 4/18/2018 4:00 | 0.7 | 18.5 | 8   | 3.4 | 0.1751 | 4.2 |
| 4/18/2018 4:01 | 1.2 | 18.3 | 8.1 | 3.5 | 0.1752 | 4.3 |
| 4/18/2018 4:02 | 0.8 | 18.6 | 8   | 3.5 | 0.1799 | 4.4 |
| 4/18/2018 4:03 | 1.7 | 18.6 | 7.7 | 3.5 | 0.1704 | 4.3 |
| 4/18/2018 4:04 | 1.4 | 18.8 | 8   | 3.5 | 0.1839 | 4.3 |
| 4/18/2018 4:05 | 2.2 | 18.7 | 7.8 | 3.6 | 0.1751 | 4.4 |
| 4/18/2018 4:06 | 2.5 | 18.6 | 8.3 | 3.6 | 0.1792 | 4.4 |
| 4/18/2018 4:07 | 2.4 | 18.6 | 8.3 | 3.7 | 0.1858 | 4.4 |
| 4/18/2018 4:08 | 3   | 18.7 | 8.1 | 3.7 | 0.1721 | 4.4 |
| 4/18/2018 4:09 | 1.4 | 18.6 | 8.3 | 3.7 | 0.1814 | 4.3 |
| 4/18/2018 4:10 | 2.3 | 18.4 | 8.6 | 3.7 | 0.1783 | 4.4 |
| 4/18/2018 4:11 | 2.3 | 18.3 | 8.9 | 3.8 | 0.1716 | 4.4 |
| 4/18/2018 4:12 | 1.7 | 18.6 | 9.1 | 3.8 | 0.1892 | 4.3 |
| 4/18/2018 4:13 | 2.5 | 18.3 | 8   | 3.8 | 0.1698 | 4.1 |
| 4/18/2018 4:14 | 0.5 | 18.6 | 8.7 | 3.8 | 0.1858 | 3.8 |
| 4/18/2018 4:15 | 2   | 18.6 | 8.2 | 3.8 | 0.1756 | 3.8 |
| 4/18/2018 4:16 | 0.8 | 18.8 | 8.5 | 3.8 | 0.18   | 3.8 |
| 4/18/2018 4:17 | 2.9 | 18.8 | 8.2 | 3.9 | 0.1844 | 3.8 |
| 4/18/2018 4:18 | 3.2 | 18.9 | 8.6 | 3.9 | 0.1741 | 3.9 |
| 4/18/2018 4:19 | 2.7 | 18.5 | 8.7 | 3.9 | 0.1748 | 4.2 |
| 4/18/2018 4:20 | 2   | 18.4 | 8.8 | 3.9 | 0.17   | 4.2 |
| 4/18/2018 4:21 | 1.9 | 18.4 | 9   | 3.9 | 0.167  | 4.4 |
| 4/18/2018 4:22 | 2.1 | 18.5 | 8.9 | 3.9 | 0.1833 | 4.4 |
| 4/18/2018 4:23 |     | 18.6 | 8.9 | 3.9 | 0.1742 | 4.5 |
| 4/18/2018 4:24 |     | 18.5 | 8.6 | 4   | 0.1791 | 4.5 |
| 4/18/2018 4:25 |     | 18.6 | 8.7 | 4   | 0.1892 | 4.5 |
| 4/18/2018 4:26 |     | 18.7 | 8.9 | 4   | 0.1713 | 4.4 |

|                |     |      |      |     |        |     |
|----------------|-----|------|------|-----|--------|-----|
| 4/18/2018 4:27 |     | 18.6 | 8.8  | 4.1 | 0.1856 | 4.5 |
| 4/18/2018 4:28 | 4.5 | 18.3 | 9.1  | 4   | 0.1766 | 4.4 |
| 4/18/2018 4:29 | 0.7 | 18.7 | 9.1  | 4   | 0.1862 | 4.4 |
| 4/18/2018 4:30 | 2.5 | 18.5 | 9.1  | 4   | 0.1872 | 4.4 |
| 4/18/2018 4:31 | 2.2 | 18.4 | 9.5  | 4   | 0.1828 | 4.5 |
| 4/18/2018 4:32 | 1.8 | 18.4 | 9.4  | 4   | 0.1806 | 4.4 |
| 4/18/2018 4:33 | 2.8 | 18.6 | 8.8  | 4   | 0.171  | 4.4 |
| 4/18/2018 4:34 | 0.8 | 18.5 | 9    | 4   | 0.1855 | 4.3 |
| 4/18/2018 4:35 | 2.5 | 18.5 | 8.8  | 3.9 | 0.1822 | 2.4 |
| 4/18/2018 4:36 | 1.8 | 18.6 | 8.8  | 3.9 | 0.1748 | 1.4 |
| 4/18/2018 4:37 | 2.1 | 18.6 | 9.2  | 3.9 | 0.1887 | 1.4 |
| 4/18/2018 4:38 | 2.1 | 18.6 | 8.8  | 3.9 | 0.1745 | 1.4 |
| 4/18/2018 4:39 | 3.6 | 18.7 | 8.5  | 3.9 | 0.1764 | 1.4 |
| 4/18/2018 4:40 | 2.2 | 18.7 | 8.9  | 3.9 | 0.1835 | 1.4 |
| 4/18/2018 4:41 | 1.2 | 18.6 | 8.9  | 3.9 | 0.1794 | 1.4 |
| 4/18/2018 4:42 | 2.1 | 18.7 | 8.9  | 3.9 | 0.1803 | 1.4 |
| 4/18/2018 4:43 | 2.2 | 18.5 | 9.2  | 3.9 | 0.1787 | 1.4 |
| 4/18/2018 4:44 | 2.7 | 18.5 | 9.1  | 3.9 | 0.1835 | 1.4 |
| 4/18/2018 4:45 | 1.9 | 18.4 | 8.8  | 3.9 | 0.1844 | 1.4 |
| 4/18/2018 4:46 | 2   | 18.5 | 8.9  | 3.9 | 0.1738 | 1.4 |
| 4/18/2018 4:47 | 3.1 | 18.7 | 8.9  | 3.9 | 0.1843 | 1.4 |
| 4/18/2018 4:48 | 3.5 | 18.6 | 9.6  | 3.9 | 0.1788 | 1.5 |
| 4/18/2018 4:49 | 2.6 | 18.7 | 9.2  | 3.9 | 0.1859 | 1.6 |
| 4/18/2018 4:50 | 1   | 18.5 | 8.6  | 4   | 0.184  | 1.5 |
| 4/18/2018 4:51 | 3.4 | 18.5 | 8.7  | 4   | 0.1795 | 1.5 |
| 4/18/2018 4:52 | 1.1 | 18.8 | 8.8  | 4.1 | 0.1843 | 1.5 |
| 4/18/2018 4:53 | 1.9 | 18.6 | 8.8  | 4.1 | 0.186  | 1.6 |
| 4/18/2018 4:54 | 1.5 | 18.5 | 9.2  | 4.1 | 0.1727 | 1.8 |
| 4/18/2018 4:55 | 1.5 | 18.6 | 9.3  | 4.1 | 0.1858 | 2   |
| 4/18/2018 4:56 | 2.1 | 18.6 | 9.3  | 4.2 | 0.1746 | 2.2 |
| 4/18/2018 4:57 | 1.5 | 18.5 | 9.2  | 4.2 | 0.1821 | 2.4 |
| 4/18/2018 4:58 | 2.2 | 18.6 | 9    | 4.2 | 0.1893 | 2.7 |
| 4/18/2018 4:59 | 2.3 | 18.5 | 9.2  | 4.3 | 0.1764 | 2.9 |
| 4/18/2018 5:00 | 2.6 | 18.6 | 9.1  | 4.4 | 0.1851 | 3.1 |
| 4/18/2018 5:01 | 1.8 | 18.6 | 9.1  | 4.4 | 0.1828 | 3.2 |
| 4/18/2018 5:02 | 1.8 | 18.4 | 9.1  | 4.5 | 0.1744 | 3.2 |
| 4/18/2018 5:03 | 2.3 | 18.4 | 9.4  | 4.6 | 0.1908 | 3.3 |
| 4/18/2018 5:04 | 2.4 | 18.5 | 9.2  | 4.7 | 0.1765 | 3.4 |
| 4/18/2018 5:05 | 1.8 | 18.3 | 9.4  | 4.8 | 0.1845 | 3.5 |
| 4/18/2018 5:06 | 1.3 | 18.4 | 9.7  | 4.9 | 0.1834 | 3.5 |
| 4/18/2018 5:07 | 1.9 | 18.3 | 9.3  | 4.9 | 0.1723 | 3.4 |
| 4/18/2018 5:08 | 1   | 18.3 | 9    | 5   | 0.1897 | 3.5 |
| 4/18/2018 5:09 | 0.6 | 18.5 | 9.8  | 5.1 | 0.1762 | 3.6 |
| 4/18/2018 5:10 | 1.6 | 18.5 | 9.1  | 5.1 | 0.1912 | 3.6 |
| 4/18/2018 5:11 | 1.7 | 18.1 | 10.2 | 5.2 | 0.184  | 3.5 |
| 4/18/2018 5:12 | 2.6 | 18.7 | 10   | 5.2 | 0.1842 | 3.6 |
| 4/18/2018 5:13 | 1.1 | 18.4 | 9.2  | 5.3 | 0.1866 | 3.6 |

|                |     |      |      |     |        |     |
|----------------|-----|------|------|-----|--------|-----|
| 4/18/2018 5:14 | 3.7 | 18.6 | 9.5  | 5.3 | 0.1763 | 3.7 |
| 4/18/2018 5:15 | 2.3 | 18.5 | 9.7  | 5.4 | 0.1831 | 3.8 |
| 4/18/2018 5:16 | 1.5 | 18.8 | 9.8  | 5.5 | 0.1823 | 3.9 |
| 4/18/2018 5:17 | 1.7 | 18.5 | 9.7  | 5.5 | 0.1818 | 4   |
| 4/18/2018 5:18 | 1.1 | 18.6 | 9.6  | 5.5 | 0.1905 | 3.9 |
| 4/18/2018 5:19 | 1.5 | 18.4 | 10   | 5.6 | 0.1787 | 4.1 |
| 4/18/2018 5:20 | 2.1 | 18.6 | 9.9  | 5.6 | 0.1809 | 4   |
| 4/18/2018 5:21 | 3   | 18.5 | 9.8  | 5.7 | 0.1872 | 4   |
| 4/18/2018 5:22 | 0.5 | 18   | 10.2 | 5.7 | 0.1822 | 4.2 |
| 4/18/2018 5:23 | 0.5 | 18.3 | 9.7  | 5.8 | 0.1915 | 4.2 |
| 4/18/2018 5:24 | 0.9 | 18.6 | 9.4  | 5.8 | 0.1852 | 4.2 |
| 4/18/2018 5:25 | 2   | 18.4 | 9    | 5.8 | 0.1869 | 4.2 |
| 4/18/2018 5:26 | 3.1 | 18.6 | 9.6  | 5.8 | 0.1908 | 4.2 |
| 4/18/2018 5:27 | 1.1 | 18.5 | 9.6  | 5.8 | 0.1751 | 4.2 |
| 4/18/2018 5:28 | 1.4 | 18.6 | 9.7  | 5.8 | 0.1949 | 4.3 |
| 4/18/2018 5:29 | 2.8 | 18.7 | 9.2  | 5.8 | 0.1817 | 4.4 |
| 4/18/2018 5:30 | 2.1 | 18.5 | 9.4  | 5.8 | 0.1867 | 4.3 |
| 4/18/2018 5:31 | 3   | 18.4 | 9.3  | 5.8 | 0.1855 | 4.2 |
| 4/18/2018 5:32 | 1.9 | 18.5 | 9.3  | 5.8 | 0.1741 | 4.2 |
| 4/18/2018 5:33 | 1.1 | 18.6 | 9.2  | 5.8 | 0.19   | 4.3 |
| 4/18/2018 5:34 | 2.9 | 18.5 | 9.2  | 5.9 | 0.1845 | 4.3 |
| 4/18/2018 5:35 | 1.1 | 18.8 | 9    | 5.9 | 0.1822 | 4.3 |
| 4/18/2018 5:36 | 3.4 | 18.7 | 8.8  | 5.9 | 0.1959 | 4.2 |
| 4/18/2018 5:37 | 2.8 | 18.5 | 9.1  | 5.9 | 0.1816 | 4.3 |
| 4/18/2018 5:38 | 1.5 | 18.6 | 9.4  | 5.9 | 0.1841 | 4.3 |
| 4/18/2018 5:39 | 2.1 | 18.6 | 8.9  | 5.9 | 0.1834 | 4.3 |
| 4/18/2018 5:40 | 2.9 | 18.6 | 8.8  | 5.9 | 0.1781 | 4.4 |
| 4/18/2018 5:41 | 2.8 | 18.8 | 8.7  | 6   | 0.1908 | 4.3 |
| 4/18/2018 5:42 | 2.3 | 18.5 | 9    | 6   | 0.1815 | 4.4 |
| 4/18/2018 5:43 | 2.4 | 18.6 | 9.2  | 6   | 0.182  | 4.4 |
| 4/18/2018 5:44 | 1.9 | 18.7 | 8.8  | 6   | 0.1864 | 4.4 |
| 4/18/2018 5:45 | 1.9 | 18.8 | 8.8  | 6.1 | 0.1736 | 4.4 |
| 4/18/2018 5:46 | 2.6 | 18.8 | 8.9  | 6.1 | 0.1927 | 4.4 |
| 4/18/2018 5:47 | 2.7 | 18.6 | 8.9  | 6.1 | 0.1797 | 4.3 |
| 4/18/2018 5:48 | 1.1 | 18.8 | 8.9  | 6.2 | 0.1849 | 4.2 |
| 4/18/2018 5:49 | 2.3 | 18.8 | 8.7  | 6.2 | 0.1977 | 4.2 |
| 4/18/2018 5:50 | 3.1 | 18.8 | 8.9  | 6.3 | 0.1825 | 4.3 |
| 4/18/2018 5:51 | 1.3 | 18.5 | 8.8  | 6.3 | 0.1877 | 4.2 |
| 4/18/2018 5:52 | 2.3 | 18.4 | 9.1  | 6.4 | 0.1897 | 4.3 |
| 4/18/2018 5:53 | 2.8 | 18.6 | 9    | 6.4 | 0.1846 | 4.3 |
| 4/18/2018 5:54 | 2.4 | 18.6 | 8.9  | 6.4 | 0.1998 | 4.3 |
| 4/18/2018 5:55 | 2.2 | 18.5 | 8.6  | 6.4 | 0.1801 | 4.4 |
| 4/18/2018 5:56 | 1.6 | 18.6 | 8.8  | 6.5 | 0.1938 | 4.3 |
| 4/18/2018 5:57 | 2.7 | 18.6 | 8.8  | 6.5 | 0.1864 | 4.4 |
| 4/18/2018 5:58 | 2.7 | 18.7 | 8.8  | 6.5 | 0.1853 | 4.2 |
| 4/18/2018 5:59 | 1.9 | 18.6 | 8.8  | 6.5 | 0.1888 | 4.2 |
| 4/18/2018 6:00 | 1.1 | 18.6 | 9    | 6.6 | 0.1809 | 4.3 |

|                |     |      |     |     |        |     |
|----------------|-----|------|-----|-----|--------|-----|
| 4/18/2018 6:01 | 1.7 | 18.6 | 8.8 | 6.6 | 0.1855 | 4.2 |
| 4/18/2018 6:02 | 1.9 | 18.7 | 8.8 | 6.6 | 0.1904 | 4   |
| 4/18/2018 6:03 | 1.3 | 18.6 | 8.6 | 6.7 | 0.1778 | 4.1 |
| 4/18/2018 6:04 | 0.4 | 18.6 | 9   | 6.8 | 0.1993 | 4.1 |
| 4/18/2018 6:05 | 2.6 | 18.6 | 8.6 | 6.8 | 0.1838 | 4.1 |
| 4/18/2018 6:06 | 0.6 | 18.6 | 8.6 | 6.8 | 0.1828 | 4.1 |
| 4/18/2018 6:07 | 2.3 | 18.6 | 8.7 | 6.9 | 0.1983 | 4.1 |
| 4/18/2018 6:08 | 3.2 | 18.4 | 9   | 6.9 | 0.1821 | 4.1 |
| 4/18/2018 6:09 | 2.8 | 18.5 | 9   | 6.9 | 0.1952 | 4.2 |
| 4/18/2018 6:10 | 1.8 | 18.5 | 9.3 | 7   | 0.1962 | 4.3 |
| 4/18/2018 6:11 | 2.4 | 18.5 | 9.5 | 7   | 0.1949 | 4.3 |
| 4/18/2018 6:12 | 1.5 | 18.3 | 9.4 | 7.1 | 0.1972 | 4.3 |
| 4/18/2018 6:13 | 1.6 | 18.9 | 9.3 | 7.1 | 0.1842 | 4.3 |
| 4/18/2018 6:14 | 1.8 | 18.3 | 9.4 | 7.1 | 0.1948 | 4.2 |
| 4/18/2018 6:15 | 2   | 18.4 | 9.4 | 7.2 | 0.1934 | 4.2 |
| 4/18/2018 6:16 | 0.9 | 18.5 | 9   | 7.2 | 0.1938 | 4.2 |
| 4/18/2018 6:17 | 1.7 | 18.2 | 9.5 | 7.2 | 0.2042 | 4.2 |
| 4/18/2018 6:18 | 0.8 | 18.1 | 9.6 | 7.3 | 0.1865 | 4.2 |
| 4/18/2018 6:19 | 1.2 | 18.5 | 9.7 | 7.3 | 0.2095 | 4.3 |
| 4/18/2018 6:20 | 2.2 | 18.1 | 9.9 | 7.3 | 0.1981 | 4.2 |
| 4/18/2018 6:21 | 1.9 | 18.4 | 9.5 | 7.4 | 0.1906 | 4.1 |
| 4/18/2018 6:22 | 2.9 | 18.4 | 8.8 | 7.4 | 0.2056 | 4.1 |
| 4/18/2018 6:23 | 1.7 | 18.3 | 9.4 | 7.4 | 0.1981 | 4.2 |
| 4/18/2018 6:24 | 1.7 | 18.4 | 9.7 | 7.4 | 0.2042 | 4.2 |
| 4/18/2018 6:25 | 1.9 | 18.3 | 9.1 | 7.4 | 0.1933 | 4.2 |
| 4/18/2018 6:26 | 2.1 | 18.8 | 8.8 | 7.4 | 0.1882 | 4.1 |
| 4/18/2018 6:27 | 1.7 | 18.4 | 9.2 | 7.4 | 0.2022 | 3.9 |
| 4/18/2018 6:28 | 2.8 | 18.6 | 9.1 | 7.4 | 0.1873 | 3.9 |
| 4/18/2018 6:29 | 1.7 | 18.6 | 8.9 | 7.4 | 0.2036 | 3.9 |
| 4/18/2018 6:30 | 1.1 | 18.6 | 8.7 | 7.4 | 0.1887 | 3.1 |
| 4/18/2018 6:31 | 0.7 | 18.5 | 8.8 | 7.4 | 0.1934 | 1.8 |
| 4/18/2018 6:32 | 2.9 | 18.4 | 9   | 7.4 | 0.2084 | 1.9 |
| 4/18/2018 6:33 | 0.9 | 18.7 | 9.1 | 7.5 | 0.1946 | 2   |
| 4/18/2018 6:34 | 1.8 | 18.5 | 9   | 7.5 | 0.2105 | 2   |
| 4/18/2018 6:35 | 2.9 | 18.3 | 9.4 | 7.6 | 0.1997 | 2.1 |
| 4/18/2018 6:36 | 1.4 | 18.4 | 9.4 | 7.6 | 0.1972 | 2.2 |
| 4/18/2018 6:37 | 1.5 | 18.6 | 9.6 | 7.6 | 0.2102 | 2.2 |
| 4/18/2018 6:38 | 2   | 18.3 | 9.5 | 7.6 | 0.1994 | 2.3 |
| 4/18/2018 6:39 | 2   | 18.4 | 9.4 | 7.7 | 0.2047 | 2.2 |
| 4/18/2018 6:40 | 2   | 18.7 | 9.3 | 7.7 | 0.1968 | 2.1 |
| 4/18/2018 6:41 | 1.2 | 18.7 | 9.1 | 7.7 | 0.1992 | 2.3 |
| 4/18/2018 6:42 | 0.9 | 18.4 | 9.1 | 7.7 | 0.2083 | 2.4 |
| 4/18/2018 6:43 | 0.6 | 18.4 | 9   | 7.8 | 0.1993 | 2.3 |
| 4/18/2018 6:44 | 1.2 | 18.2 | 9.1 | 7.8 | 0.2012 | 2.3 |
| 4/18/2018 6:45 | 3.7 | 18.5 | 9.2 | 7.9 | 0.2064 | 2.2 |
| 4/18/2018 6:46 | 2.1 | 18.5 | 8.9 | 7.9 | 0.201  | 2.3 |
| 4/18/2018 6:47 | 1.6 | 18.3 | 9.3 | 7.9 | 0.2059 | 2.3 |

|                |     |      |     |      |     |     |        |      |
|----------------|-----|------|-----|------|-----|-----|--------|------|
| 4/18/2018 6:48 |     |      | 3.5 | 18.7 | 9.5 | 7.9 | 0.1938 | 2.2  |
| 4/18/2018 6:49 |     |      | 1.9 | 18.4 | 9.4 | 8   | 0.2054 | 2.3  |
| 4/18/2018 6:50 |     |      | 1.9 | 18.4 | 9.1 | 8   | 0.1953 | 2.3  |
| 4/18/2018 6:51 |     |      | 2.4 | 18.4 | 9   | 8   | 0.1986 | 2.4  |
| 4/18/2018 6:52 |     |      | 2   | 18.6 | 9.1 | 8   | 0.2103 | 2.5  |
| 4/18/2018 6:53 |     |      | 1.1 | 18.6 | 9.4 | 8   | 0.1937 | 2.6  |
| 4/18/2018 6:54 |     |      | 1.6 | 18.7 | 9.5 | 8.1 | 0.2041 | 2.4  |
| 4/18/2018 6:55 |     |      | 3.3 | 18.3 | 9.7 | 8.1 | 0.2024 | 2.4  |
| 4/18/2018 6:56 |     |      | 1.4 | 18.4 | 9.7 | 8.1 | 0.1915 | 2.5  |
| 4/18/2018 6:57 |     |      | 2.5 | 18.4 | 9.8 | 8.1 | 0.2103 | 2.5  |
| 4/18/2018 6:58 |     |      | 1.1 | 18.3 | 9.8 | 8.1 | 0.1912 | 2.5  |
| 4/18/2018 6:59 |     |      | 2.7 | 18.6 | 9.7 | 8.2 | 0.2053 | 2.4  |
| 4/18/2018 7:00 |     |      |     | 18.5 | 9.2 | 8.1 | 0.2025 | 2.3  |
| 4/18/2018 7:01 |     |      | 1.7 | 18.7 | 9   | 8.2 | 0.196  | 2.6  |
| 4/18/2018 7:02 |     |      |     | 18.5 | 9.2 | 8.2 | 0.2067 | 2.9  |
| 4/18/2018 7:03 |     |      |     | 18.5 | 9.3 | 8.2 | 0.2001 | 3    |
| 4/18/2018 7:04 |     |      | 2.1 | 18.3 | 9.4 | 8.2 | 0.1951 | 3.1  |
| 4/18/2018 7:05 |     |      |     | 18.6 | 9.2 | 8.2 | 0.205  | 3.2  |
| 4/18/2018 7:06 |     |      |     | 18.4 | 9.2 | 8.2 | 0.1889 | 3.3  |
| 4/18/2018 7:07 |     |      | 1.7 | 18.5 | 9.4 | 8.2 | 0.2038 | 3.2  |
| 4/18/2018 7:08 |     |      |     | 18.4 | 9.5 | 8.2 | 0.2031 | 3.1  |
| 4/18/2018 7:09 |     |      | 1.4 | 18.6 | 9.2 | 8.2 | 0.1947 | 2.9  |
| 4/18/2018 7:10 |     |      | 2.6 | 18.6 | 9   | 8.2 | 0.2058 | 2.7  |
| 4/18/2018 7:11 |     |      | 0.4 | 18.6 | 8.9 | 8.1 | 0.1936 | 2.8  |
| 4/18/2018 7:12 |     |      |     | 18.6 | 8.8 | 8.1 | 0.2047 | 2.9  |
| 4/18/2018 7:13 |     |      | 2.7 | 18.5 | 8.8 | 8.1 | 0.1961 | 2.9  |
| 4/18/2018 7:14 |     |      | 0   | 18.6 | 8.7 | 8.1 | 0.1961 | 2.9  |
| 4/18/2018 7:15 |     |      | 1.1 | 18.6 | 8.7 | 8.1 | 0.2086 | 3    |
| 4/18/2018 7:16 |     |      | 1.6 | 18.6 | 8.8 | 8.2 | 0.1882 | 3    |
| 4/18/2018 7:17 |     |      | 3.3 | 18.7 | 8.8 | 8.1 | 0.2075 | 2.8  |
| 4/18/2018 7:18 |     |      |     | 18.4 | 8.8 | 8.2 | 0.1993 | 2    |
| 4/18/2018 7:19 |     |      |     | 18.4 | 8.6 | 8.1 | 0.1827 | 1.6  |
| 4/18/2018 7:20 |     |      | 9.8 | 18.8 | 8.6 | 8.2 | 0.2002 | 1.8  |
| 4/18/2018 7:21 |     |      | 2.7 | 18.7 | 8.7 | 8.2 | 0.2044 | 1.6  |
| 4/18/2018 7:22 |     |      | 8.3 | 18.5 | 8.6 | 8.2 | 0.2038 | 0.1  |
| 4/18/2018 7:23 |     |      | 2.5 | 18.7 | 8.6 | 8.2 | 0.2174 | 0.2  |
| 4/18/2018 7:24 |     |      | 1.4 | 18.4 | 8.7 | 8.2 | 0.1986 | 0.5  |
| 4/18/2018 7:25 |     |      | 2.1 | 18.6 | 8.5 | 8.2 | 0.2159 | 0.7  |
| 4/18/2018 7:26 |     |      | 2.1 | 18.8 | 8.5 | 8.2 | 0.2079 | 0.8  |
| 4/18/2018 7:27 |     |      | 2   | 18.6 | 8.9 | 8.2 | 0.2211 | 1    |
| 4/18/2018 7:28 |     |      | 1.6 | 18.7 | 8.7 | 8.2 | 0.2252 | 1.1  |
| 4/18/2018 7:29 |     |      | 1   | 18.5 | 8.5 | 8.3 | 0.2171 | 1.2  |
| 4/18/2018 7:30 | 0.2 | -0.4 | 2   | 18.8 | 8.6 | 8.3 | 0.2201 | 1.3  |
| 4/18/2018 7:31 | 0.2 | -0.6 | 1.4 | 18.7 | 8.6 | 8.3 | 0.2262 | 0.6  |
| 4/18/2018 7:32 | 0.2 | 0    | 1.4 | 18.6 | 8.6 | 8.3 | 0.2318 | 2.2  |
| 4/18/2018 7:33 | 0.2 | -0.2 | 1.8 | 18.7 | 8.5 | 8.4 | 0.2367 | 25.2 |
| 4/18/2018 7:34 | 0.2 | -0.4 | 2.8 | 18.4 | 8.7 | 8.4 | 0.2291 | 33.6 |

|                |     |      |     |      |      |       |        |      |
|----------------|-----|------|-----|------|------|-------|--------|------|
| 4/18/2018 7:35 | 0.2 | -0.4 | 3.4 | 18.7 | 8.6  | 8.4   | 0.2406 | 34.1 |
| 4/18/2018 7:36 | 0.2 | -1.1 | 1.5 | 18.9 | 8.6  | 8.5   | 0.2376 | 33.9 |
| 4/18/2018 7:37 | 0.2 | -0.5 | 1.5 | 18.5 | 8.7  | 8.6   | 0.2286 | 26.8 |
| 4/18/2018 7:38 | 0.2 | -0.8 | 2   | 18.6 | 8.8  | 8.7   | 0.2483 | 5.6  |
| 4/18/2018 7:39 | 0.1 | -0.9 | 1.8 | 18.4 | 8.7  | 8.8   | 0.2469 | 0    |
| 4/18/2018 7:40 | 0.1 | -0.5 | 1.6 | 18.8 | 8.5  | 8.8   | 0.2461 | -0.5 |
| 4/18/2018 7:41 | 0.2 | -0.3 | 2.5 | 18.9 | 8.7  | 8.9   | 0.2565 | -0.5 |
| 4/18/2018 7:42 | 0.2 | 0.3  | 1.9 | 18.6 | 8.6  | 9     | 0.2384 | -0.4 |
| 4/18/2018 7:43 | 0.2 | -0.3 | 1.1 | 18.7 | 8.7  | 9.1   | 0.2531 | -0.3 |
| 4/18/2018 7:44 | 0.2 | -0.3 | 2.2 | 18.6 | 8.7  | 9.2   | 0.2526 | -0.2 |
| 4/18/2018 7:45 | 0.2 | -0.2 | 2.5 | 19   | 8.6  | 9.3   | 0.2561 | -0.2 |
| 4/18/2018 7:46 | 0.2 | -0.2 | 3.5 | 19   | 8.6  | 9.4   | 0.2571 | 0    |
| 4/18/2018 7:47 | 0.2 | -0.2 | 1.6 | 18.7 | 8.6  | 9.4   | 0.2464 | -1.2 |
| 4/18/2018 7:48 | 0.2 | -0.2 | 1.7 | 18.8 | 8.7  | 9.6   | 0.2638 | -0.4 |
| 4/18/2018 7:49 | 0.2 | -0.2 | 1.7 | 18.9 | 8.7  | 9.7   | 0.2582 |      |
| 4/18/2018 7:50 | 0.2 | -0.2 | 1.8 | 18.6 | 8.8  | 9.8   | 0.2518 |      |
| 4/18/2018 7:51 | 0.2 | -0.3 | 2.1 | 18.5 | 9    | 9.9   | 0.2722 |      |
| 4/18/2018 7:52 | 0.2 | -1   | 1.5 | 18.7 | 8.9  | 10.1  | 0.2489 |      |
| 4/18/2018 7:53 | 0.2 | -0.2 | 1.6 | 18.7 | 8.8  | 10.2  | 0.2152 |      |
| 4/18/2018 7:54 | 0.2 | -0.4 | 1.2 | 19.6 | 10.2 | 14.9  | 0.2342 |      |
| 4/18/2018 7:55 | 0.2 | -0.5 | 1.9 | 20.6 | 17.1 | 52    | 0.2848 |      |
| 4/18/2018 7:56 | 0.2 | 0.1  | 3   | 21.4 | 23.7 | 79.6  | 0.3912 |      |
| 4/18/2018 7:57 | 0.2 | -0.2 | 3.3 | 22.2 | 32.6 | 127.2 | 0.5792 |      |
| 4/18/2018 7:58 | 0.2 | -0.6 | 4.1 | 22.6 | 37.6 | 150.9 | 0.936  | 1.4  |
| 4/18/2018 7:59 | 0.2 | -0.7 | 3   | 22.8 | 38.5 | 153.6 | 1.3816 | -0.3 |
| 4/18/2018 8:00 | 0.2 | -0.6 | 3.2 | 23.3 | 38.6 | 152.1 | 1.8029 | -0.8 |
| 4/18/2018 8:01 | 0.2 | 0.4  | 1.8 | 23.3 | 40.7 | 154.6 | 2.2221 | -0.8 |
| 4/18/2018 8:02 | 0.2 | -0.3 | 3.3 | 23.4 | 41.5 | 157.4 | 2.615  | -0.2 |
| 4/18/2018 8:03 | 0.2 | 0.1  | 1.4 | 23.2 | 40.6 | 156.3 | 2.7558 | 1.3  |
| 4/18/2018 8:04 | 0.2 | 0    | 3   | 23   | 39.7 | 155.7 | 2.9468 | 1.4  |
| 4/18/2018 8:05 | 0.2 | 0    | 2.9 | 22.6 | 39   | 151.2 | 3.0236 | 1.5  |
| 4/18/2018 8:06 | 0.2 | -0.3 | 2.2 | 22.5 | 38.1 | 145.9 | 3.1682 | 1.5  |
| 4/18/2018 8:07 | 0.2 | -0.5 | 3.1 | 22.2 | 37.1 | 144.2 | 3.1063 | 1.5  |
| 4/18/2018 8:08 | 0.2 | 0    | 2.5 | 21.9 | 35.8 | 140.1 | 3.0779 | 1.5  |
| 4/18/2018 8:09 | 0.2 | -0.6 | 2   | 21.9 | 35.3 | 139.6 | 3.0595 | 1.5  |
| 4/18/2018 8:10 | 0.2 | -0.4 | 3.2 | 21.7 | 34.6 | 139.3 | 3.0704 | 1.5  |
| 4/18/2018 8:11 | 0.2 | 0.6  | 2.1 | 21.6 | 34.4 | 139   | 3.107  | 1.5  |
| 4/18/2018 8:12 | 0.2 | 0    | 4.6 | 21.6 | 34.1 | 138.4 | 3.0945 | 1.5  |
| 4/18/2018 8:13 | 0.2 | -0.4 | 3   | 21.5 | 33.3 | 133.9 | 3.0343 | 1.6  |
| 4/18/2018 8:14 | 0.2 | 0    | 1.4 | 21.4 | 32.7 | 132   | 3.0216 | 1.7  |
| 4/18/2018 8:15 | 0.2 | -0.1 | 2.7 | 21.2 | 31.9 | 129.8 | 2.9412 | 1.9  |
| 4/18/2018 8:16 | 0.2 | 0.2  | 3.2 | 21.2 | 31.7 | 128.9 | 2.9744 | 1.9  |
| 4/18/2018 8:17 | 0.2 | -0.4 | 1.5 | 21.3 | 31.3 | 127.2 | 2.9322 | 2    |
| 4/18/2018 8:18 | 0.3 | -0.2 | 2.5 | 21.1 | 30.8 | 126.2 | 2.9358 | 2.1  |
| 4/18/2018 8:19 | 0.3 | 0.1  | 1.2 | 20.9 | 30.2 | 125.8 | 2.845  | 2.3  |
| 4/18/2018 8:20 | 0.3 | 0.5  | 3.4 | 21.2 | 30   | 125.6 | 2.8872 | 2.3  |
| 4/18/2018 8:21 | 0.2 | 0.1  | 2.2 | 20.9 | 29.4 | 125.3 | 2.8338 | 2.4  |



|                |     |      |     |      |      |       |        |     |
|----------------|-----|------|-----|------|------|-------|--------|-----|
| 4/18/2018 8:22 | 0.2 | 0.1  | 1.7 | 20.7 | 29   | 124.9 | 2.7843 | 2.5 |
| 4/18/2018 8:23 | 0.3 | -0.1 | 2.7 | 20.9 | 28.4 | 124.2 | 2.7467 | 2.5 |
| 4/18/2018 8:24 | 0.3 | 0.3  | 2.2 | 20.8 | 28.3 | 123.6 | 2.7757 | 2.7 |
| 4/18/2018 8:25 | 0.3 | -0.1 | 3.1 | 20.6 | 28.1 | 122.9 | 2.7753 | 3   |
| 4/18/2018 8:26 | 0.3 | 0.1  | 2.5 | 20.3 | 27.3 | 121.5 | 2.6712 | 3.1 |
| 4/18/2018 8:27 | 0.2 | -0.1 | 3   | 20.6 | 27   | 120.5 | 2.6527 | 3.1 |
| 4/18/2018 8:28 | 0.2 | -0.3 | 2.4 | 20.4 | 26.6 | 111.5 | 2.5812 | 3.2 |
| 4/18/2018 8:29 | 0.2 | -0.4 | 1.7 | 20.4 | 26.3 | 111.5 | 2.5837 | 3.3 |
| 4/18/2018 8:30 | 0.2 | 1.2  | 3.1 | 20.4 | 26   | 112.7 | 2.568  | 3   |
| 4/18/2018 8:31 | 0.2 | -0.1 | 2.5 | 20.3 | 25.9 | 112.9 | 2.5694 | 3.1 |
| 4/18/2018 8:32 | 0.2 | 0.3  | 3   | 20.3 | 25.2 | 112.3 | 2.487  | 3.1 |
| 4/18/2018 8:33 | 0.2 | -0.6 | 2.2 | 20.4 | 25.2 | 112   | 2.5223 | 3.1 |
| 4/18/2018 8:34 | 0.1 | -0.1 | 1.2 | 20.3 | 25.2 | 111.8 | 2.5526 | 3.4 |
| 4/18/2018 8:35 | 0.1 | 0.4  | 2.4 | 20.2 | 24.8 | 111.5 | 2.5068 | 3.6 |
| 4/18/2018 8:36 | 0.1 | -0.2 | 1.9 | 20.3 | 24.6 | 110.9 | 2.5183 | 3.8 |
| 4/18/2018 8:37 | 0.1 | -0.1 | 1.9 | 20.1 | 24.3 | 110.4 | 2.4708 | 3.7 |
| 4/18/2018 8:38 | 0.1 | 0.1  | 1.6 | 20.3 | 23.7 | 109.7 | 2.4087 | 3.3 |
| 4/18/2018 8:39 | 0.1 | 0.2  | 2.6 | 20.2 | 23.9 | 109   | 2.4743 | 3.6 |
| 4/18/2018 8:40 | 0.1 | -0.5 | 1.8 | 19.8 | 23.2 | 101.4 | 2.2939 | 3.8 |
| 4/18/2018 8:41 | 0.1 | 0    | 2.4 | 19.7 | 22.8 | 99.6  | 2.2773 | 3.7 |
| 4/18/2018 8:42 | 0.1 | 0.2  | 1.3 | 19.9 | 22.4 | 95.8  | 2.1907 | 3.9 |
| 4/18/2018 8:43 | 0.2 | 0.5  | 2.4 | 19.7 | 22.3 | 95.8  | 2.2235 | 4   |
| 4/18/2018 8:44 | 0.2 | -0.6 | 0.5 | 20   | 22.4 | 96.6  | 2.2941 | 3.9 |
| 4/18/2018 8:45 | 0.2 | -0.1 | 2   | 19.8 | 22.3 | 97.2  | 2.3116 | 3.9 |
| 4/18/2018 8:46 | 0.3 | -0.3 | 3.8 | 19.7 | 22   | 97.7  | 2.3128 | 3.9 |
| 4/18/2018 8:47 | 0.3 | 0    | 3.1 | 19.8 | 21.9 | 98.3  | 2.3021 | 3.9 |
| 4/18/2018 8:48 | 0.3 | 0    | 2.4 | 20   | 21.6 | 98.5  | 2.243  | 3.9 |
| 4/18/2018 8:49 | 0.3 | 0    | 1.5 | 19.8 | 21.3 | 98.5  | 2.2135 | 4   |
| 4/18/2018 8:50 | 0.3 | 0.2  | 1.8 | 19.8 | 21   | 95.8  | 2.1595 | 4   |
| 4/18/2018 8:51 | 0.3 | 0.7  | 2.2 | 19.6 | 20.6 | 91    | 2.0742 | 4   |
| 4/18/2018 8:52 | 0.3 | -0.5 | 3.4 | 19.6 | 20.5 | 92.1  | 2.1117 | 3.8 |
| 4/18/2018 8:53 | 0.3 | -0.5 | 1.6 | 19.5 | 19.9 | 86    | 1.9663 | 2   |
| 4/18/2018 8:54 | 0.2 | -0.3 | 3.9 | 19.7 | 20   | 87.6  | 2.0896 | 1.6 |
| 4/18/2018 8:55 | 0.3 | -0.3 | 1.6 | 19.7 | 20   | 88.2  | 2.0904 | 1.7 |
| 4/18/2018 8:56 | 0.2 | -0.2 | 1.9 | 19.5 | 19.9 | 88.8  | 2.1313 | 1.8 |
| 4/18/2018 8:57 | 0.2 | 0.4  | 3   | 19.6 | 19.5 | 89.3  | 2.0607 | 1.9 |
| 4/18/2018 8:58 | 0.2 | 0.8  | 1.1 | 19.6 | 19.4 | 89.5  | 2.0485 | 1.8 |
| 4/18/2018 8:59 | 0.2 | -0.2 | 1.9 | 19.7 | 19.2 | 89.6  | 2.0356 | 1.8 |
| 4/18/2018 9:00 | 0.2 | -0.2 | 2   | 19.8 | 19.2 | 89.9  | 2.0158 | 1.8 |
| 4/18/2018 9:01 | 0.1 | -0.5 | 2.3 | 19.3 | 19.2 | 89.1  | 2.0098 | 1.8 |
| 4/18/2018 9:02 | 0.1 | -0.1 | 1.8 | 19.5 | 18.7 | 83.3  | 1.9195 | 1.8 |
| 4/18/2018 9:03 | 0.1 | 0.1  | 1.3 | 19.3 | 18.3 | 84.4  | 1.9776 | 1.6 |
| 4/18/2018 9:04 | 0.1 | 0.3  | 2.6 | 19.3 | 17.6 | 77.3  | 1.8423 | 1.6 |
| 4/18/2018 9:05 | 0.1 | 0.1  | 2.5 | 18.8 | 17.4 | 66.8  | 1.537  | 1.7 |
| 4/18/2018 9:06 | 0.1 | 0    | 1.2 | 18.8 | 16.9 | 65    | 1.5238 | 1.7 |
| 4/18/2018 9:07 | 0.1 | 0.1  | 3.2 | 18.9 | 16.6 | 59.9  | 1.5143 | 1.7 |
| 4/18/2018 9:08 | 0.1 | 0.2  | 2.7 | 18.7 | 16.3 | 65.1  | 1.4793 | 1.8 |

|                |     |      |     |      |      |       |        |     |
|----------------|-----|------|-----|------|------|-------|--------|-----|
| 4/18/2018 9:09 | 0.1 | -0.1 | 1.5 | 18.2 | 16.8 | 57.4  | 1.2553 | 1.9 |
| 4/18/2018 9:10 | 0.2 | -0.2 | 2   | 18.3 | 17.1 | 44.3  | 1.0707 | 1.9 |
| 4/18/2018 9:11 | 0.2 | 0.7  | 1.1 | 18.2 | 17.6 | 42.8  | 1.048  | 1.9 |
| 4/18/2018 9:12 | 0.3 | -0.4 | 2.8 | 18.5 | 18   | 42.4  | 1.0195 | 1.9 |
| 4/18/2018 9:13 | 0.4 | 0.2  | 1   | 18.4 | 18   | 37.6  | 0.9355 | 1.8 |
| 4/18/2018 9:14 | 0.4 | 0    | 3   | 18.3 | 17.8 | 37.1  | 0.9462 | 1.8 |
| 4/18/2018 9:15 | 0.5 | 0.8  | 2.9 | 18.1 | 18   | 37.6  | 0.9439 | 1.9 |
| 4/18/2018 9:16 | 0.5 | -0.2 | 2.4 | 18.1 | 18.2 | 37.3  | 1.0035 | 1.8 |
| 4/18/2018 9:17 | 0.4 | -0.3 | 2   | 18.2 | 18.4 | 37.5  | 0.9598 | 1.8 |
| 4/18/2018 9:18 | 0.3 | 0.7  | 3.4 | 18   | 18.4 | 37.5  | 0.9172 | 1.7 |
| 4/18/2018 9:19 | 0.3 | 0.2  | 1.2 | 18.2 | 18.4 | 37.1  | 0.8616 | 1.6 |
| 4/18/2018 9:20 | 0.4 | 0.2  | 1.4 | 18   | 18.8 | 36.4  | 0.8382 | 1.6 |
| 4/18/2018 9:21 | 0.4 | -0.2 | 0.9 | 18.2 | 18.7 | 35.7  | 0.8273 | 1.7 |
| 4/18/2018 9:22 | 0.5 | 1.2  | 0.9 | 18   | 18.7 | 34.7  | 0.7474 | 1.7 |
| 4/18/2018 9:23 | 0.5 | 0.2  | 1.5 | 18   | 18.7 | 33.3  | 0.6939 | 1.7 |
| 4/18/2018 9:24 | 0.5 | 1.2  | 1.8 | 18   | 18.7 | 31.2  | 0.6808 | 1.7 |
| 4/18/2018 9:25 | 0.6 | 0.1  | 2.4 | 18   | 18.5 | 29.3  | 0.616  | 1.7 |
| 4/18/2018 9:26 | 0.7 | -0.1 | 1   | 17.8 | 18.7 | 27.2  | 0.6177 | 1.6 |
| 4/18/2018 9:27 | 0.7 | 0.2  | 2.2 | 18.2 | 18.7 | 25.3  | 0.6094 | 1.6 |
| 4/18/2018 9:28 | 0.7 | 0.7  | 2   | 18   | 18.6 | 23.7  | 0.5516 | 1.6 |
| 4/18/2018 9:29 | 0.7 | 0.9  | 0.8 | 18   | 18.8 | 22    | 0.5348 | 1.6 |
| 4/18/2018 9:30 | 0.8 | 0.9  | 1.7 | 18.2 | 18.6 | 20.3  | 0.5018 | 1.7 |
| 4/18/2018 9:31 | 1   | 1.1  | 2.7 | 18.6 | 17.7 | 18.8  | 0.4738 | 1.6 |
| 4/18/2018 9:32 | 1.1 | 1.2  | 2.3 | 18.2 | 18   | 17.6  | 0.4628 | 1.7 |
| 4/18/2018 9:33 | 1.1 | 0.6  | 1.9 | 18.4 | 18.1 | 16.5  | 0.4604 | 1.8 |
| 4/18/2018 9:34 | 1   | 0.7  | 1.6 | 18   | 18.3 | 15.6  | 0.4879 | 1.7 |
| 4/18/2018 9:35 | 0.8 | -0.2 | 2.3 | 21.5 | 21.6 | 27.5  | 0.5708 | 1.8 |
| 4/18/2018 9:36 | 0.6 | -0.1 | 3.2 | 23.3 | 43.2 | 73.9  | 0.7309 | 1.8 |
| 4/18/2018 9:37 | 0.4 | -0.4 | 4.7 | 24.6 | 55.7 | 193.2 | 0.8864 | 1.9 |
| 4/18/2018 9:38 | 0.2 | 0.5  | 3.9 | 25.2 | 64.2 | 247   | 1.216  | 1.9 |
| 4/18/2018 9:39 | 0.2 | 0.1  | 4.7 | 25.8 | 70.3 | 276   | 1.6832 | 2   |
| 4/18/2018 9:40 | 0.2 | -0.2 | 3.6 | 26.6 | 73.9 | 289.5 | 2.257  | 1.9 |
| 4/18/2018 9:41 | 0.3 | 0.5  | 3.5 | 27.1 | 74.8 | 292   | 2.8427 | 1.8 |
| 4/18/2018 9:42 | 0.2 | 0    | 4.8 | 27.2 | 74.6 | 290.4 | 3.2947 | 1.8 |
| 4/18/2018 9:43 | 0.2 | -0.1 | 3.9 | 26.6 | 71.7 | 271.4 | 3.465  | 1.9 |
| 4/18/2018 9:44 | 0.1 | 0.4  | 4.1 | 27   | 70   | 272.6 | 3.8502 | 1.8 |
| 4/18/2018 9:45 | 0.1 | -0.4 | 3.6 | 27.1 | 71   | 278.2 | 4.2658 | 1.8 |
| 4/18/2018 9:46 | 0.1 | 0    | 3.7 | 27.2 | 70.2 | 278.3 | 4.4657 | 1.8 |
| 4/18/2018 9:47 | 0.2 | 0.3  | 3.6 | 26.2 | 68.3 | 271.3 | 4.5128 | 1.8 |
| 4/18/2018 9:48 | 0.1 | -0.2 | 2.8 | 26.4 | 67.1 | 267.2 | 4.6298 | 1.7 |
| 4/18/2018 9:49 | 0.1 | 0    | 2.2 | 26.3 | 66.3 | 266.7 | 4.781  | 1.7 |
| 4/18/2018 9:50 | 0.1 | -0.6 | 3.4 | 25.8 | 64.8 | 262.4 | 4.7537 | 1.8 |
| 4/18/2018 9:51 | 0.1 | 0.4  | 2.8 | 24.5 | 61.4 | 254.7 | 4.5093 | 1.8 |
| 4/18/2018 9:52 | 0.1 | 0.8  | 2.9 | 25.5 | 60.6 | 255.3 | 4.6307 | 1.8 |
| 4/18/2018 9:53 | 0.1 | -0.5 | 3.8 | 25   | 61.4 | 254.7 | 4.8452 | 1.8 |
| 4/18/2018 9:54 | 0.1 | -0.1 | 4   | 24.7 | 59.6 | 248.2 | 4.717  | 1.8 |
| 4/18/2018 9:55 | 0.1 | -0.4 | 3.9 | 24.3 | 57.4 | 238   | 4.5747 | 1.7 |

|                 |     |      |     |      |      |       |        |     |
|-----------------|-----|------|-----|------|------|-------|--------|-----|
| 4/18/2018 9:56  | 0.1 | -0.4 | 3.6 | 24.3 | 57.3 | 238.8 | 4.6235 | 1.8 |
| 4/18/2018 9:57  | 0.1 | 0    | 2.4 | 23.9 | 55.2 | 231.9 | 4.51   | 1.8 |
| 4/18/2018 9:58  | 0.1 | -0.1 | 2.1 | 23.9 | 54.7 | 236.2 | 4.4107 | 1.8 |
| 4/18/2018 9:59  | 0.1 | 0.2  | 4.5 | 24.2 | 55   | 237.7 | 4.6367 | 1.6 |
| 4/18/2018 10:00 | 0.1 | -0.5 | 4   | 23.3 | 52.3 | 219.4 | 4.3163 | 1.6 |
| 4/18/2018 10:01 | 0   | -0.2 | 2.9 | 23.8 | 51.6 | 227.4 | 4.5168 | 1.6 |
| 4/18/2018 10:02 | 0.1 | -0.5 | 3.3 | 23.7 | 51.6 | 231.2 | 4.631  | 1.6 |
| 4/18/2018 10:03 | 0.1 | -0.2 | 3.2 | 23.1 | 51.5 | 227.5 | 4.5482 | 1.6 |
| 4/18/2018 10:04 | 0.1 | -0.2 | 4.3 | 23.2 | 50.1 | 215.9 | 4.4162 | 1.6 |
| 4/18/2018 10:05 | 0.1 | -0.1 | 1.4 | 23   | 49.9 | 218.3 | 4.4218 | 1.6 |
| 4/18/2018 10:06 | 0.2 | 0.1  | 4   | 22.8 | 48.2 | 213.8 | 4.3477 | 1.6 |
| 4/18/2018 10:07 | 0.2 | -0.4 | 2.5 | 23   | 48.6 | 217.1 | 4.441  | 1.6 |
| 4/18/2018 10:08 | 0.2 | 0.3  | 4   | 22.3 | 45.4 | 207.2 | 4.1323 | 1.6 |
| 4/18/2018 10:09 | 0.2 | 0    | 2.7 | 22.8 | 47.1 | 213.2 | 4.4268 | 1.6 |
| 4/18/2018 10:10 | 0.2 | 0.2  | 2.8 | 22.1 | 45.3 | 211.7 | 4.2538 | 1.7 |
| 4/18/2018 10:11 | 0.2 | 0.1  | 1.9 | 22.2 | 44.9 | 204   | 4.2035 | 1.7 |
| 4/18/2018 10:12 | 0.2 | 0.3  | 1.1 | 22.1 | 43.6 | 205.4 | 4.1458 | 1.8 |
| 4/18/2018 10:13 | 0.2 | 0    | 2.3 | 22.1 | 44.5 | 205.9 | 4.3312 | 1.8 |
| 4/18/2018 10:14 | 0.2 | 0.6  | 2.5 | 21.8 | 42.8 | 206.1 | 4.164  | 1.9 |
| 4/18/2018 10:15 | 0.2 | -0.8 | 3.9 | 22.4 | 43.2 | 202.7 | 4.2817 | 2   |
| 4/18/2018 10:16 | 0.3 | 0.5  | 2.7 | 22   | 42.5 | 198.2 | 4.2277 | 2   |
| 4/18/2018 10:17 | 0.3 | 0.2  | 2.8 | 21.4 | 40.2 | 190   | 3.9792 | 1.9 |
| 4/18/2018 10:18 | 0.3 | 0.4  | 1.6 | 21.5 | 38.8 | 180.1 | 3.8493 | 1.9 |
| 4/18/2018 10:19 | 0.3 | 0.7  | 2.7 | 21.8 | 39.8 | 189.9 | 4.1048 | 2   |
| 4/18/2018 10:20 | 0.3 | -0.2 | 8.9 | 21.4 | 39   | 185.7 | 3.972  | 2   |
| 4/18/2018 10:21 | 0.3 | -0.1 |     | 21.5 | 39.6 | 191.4 | 4.1228 | 1.7 |
| 4/18/2018 10:22 | 0.2 | -0.3 |     | 21.7 | 38.6 | 186.6 | 4.048  | 1.6 |
| 4/18/2018 10:23 | 0.2 | -0.2 |     | 21.5 | 38.6 | 188.5 | 4.0975 | 1.6 |
| 4/18/2018 10:24 | 0.3 | -0.1 |     | 21.3 | 36.9 | 176.5 | 3.8953 | 1.5 |
| 4/18/2018 10:25 | 0.2 | 0    | 2.5 | 21   | 34.8 | 163.8 | 3.6532 | 1.5 |
| 4/18/2018 10:26 | 0.2 | 0.4  |     | 21   | 34.6 | 161.6 | 3.681  | 1.5 |
| 4/18/2018 10:27 | 0.2 | 0.3  | 2   | 21.1 | 35.6 | 177.7 | 3.9038 | 1.5 |
| 4/18/2018 10:28 | 0.2 | 0.1  |     | 20.8 | 34.3 | 165.4 | 3.6487 | 1.5 |
| 4/18/2018 10:29 | 0.2 | -0.6 | 2.6 | 21.1 | 34.4 | 171   | 3.795  | 1.5 |
| 4/18/2018 10:30 | 0.2 | 0.1  | 8.9 | 21.1 | 34.3 | 171.3 | 3.7957 | 1.5 |
| 4/18/2018 10:31 | 0.2 | 0.2  | 4.6 | 20.4 | 32.5 | 159.4 | 3.5283 | 1.5 |
| 4/18/2018 10:32 | 0.2 | 0.2  | 3.3 | 20.9 | 32.4 | 154   | 3.5723 | 1.6 |
| 4/18/2018 10:33 | 0.2 | 0.1  |     | 21   | 32.7 | 166   | 3.709  | 1.8 |
| 4/18/2018 10:34 | 0.2 | 0.4  |     | 20.8 | 32.5 | 164.7 | 3.6788 | 2   |
| 4/18/2018 10:35 | 0.2 | -0.5 |     | 20.7 | 32   | 167.6 | 3.6365 | 2   |
| 4/18/2018 10:36 | 0.2 | 0.1  | 2.9 | 20.9 | 31.7 | 167.6 | 3.6575 | 2.3 |
| 4/18/2018 10:37 | 0.1 | -0.2 | 7.1 | 20.9 | 31.2 | 166.7 | 3.6605 | 2   |
| 4/18/2018 10:38 | 0.1 | -0.2 | 2   | 20.5 | 31   | 164.8 | 3.6665 | 1.5 |
| 4/18/2018 10:39 | 0.1 | 0    | 2.8 | 20.6 | 30.6 | 159.4 | 3.579  | 1.5 |
| 4/18/2018 10:40 | 0.2 | 0    | 2.6 | 20.2 | 28.9 | 143.6 | 3.2783 | 1.5 |
| 4/18/2018 10:41 | 0.2 | 0.5  | 3.5 | 20.5 | 28.8 | 147.8 | 3.4072 | 1.5 |
| 4/18/2018 10:42 | 0.2 | 0.1  | 1.9 | 20   | 28.6 | 148.1 | 3.3815 | 1.6 |

|                 |     |      |     |      |       |       |        |     |
|-----------------|-----|------|-----|------|-------|-------|--------|-----|
| 4/18/2018 10:43 | 0.2 | 0    | 2.2 | 20.4 | 27.8  | 143.5 | 3.2923 | 1.7 |
| 4/18/2018 10:44 | 0.2 | 0.6  | 1.3 | 20.5 | 27.9  | 150.2 | 3.3648 | 1.7 |
| 4/18/2018 10:45 | 0.2 | -0.1 | 3.5 | 20.7 | 28.3  | 150.1 | 3.4667 | 1.6 |
| 4/18/2018 10:46 | 0.2 | -0.3 | 2.8 | 20.5 | 28    | 147.4 | 3.4473 | 1.6 |
| 4/18/2018 10:47 | 0.2 | 0    | 5   | 20.5 | 27.8  | 149.1 | 3.4208 | 1.6 |
| 4/18/2018 10:48 |     |      |     |      |       |       | 0      |     |
| 4/18/2018 10:49 |     |      |     |      |       |       | 0      |     |
| 4/18/2018 10:50 | 0.2 | 0    | 2.9 | 20.2 | 26.1  | 138.6 | 3.2017 | 1.5 |
| 4/18/2018 10:51 | 0.5 | 1.1  | 2.5 | 20   | 23.4  | 118.9 | 2.5697 | 1.6 |
| 4/18/2018 10:52 | 0.8 | 1.2  | 2.6 | 19.7 | 21.2  | 94.1  | 2.2722 | 1.6 |
| 4/18/2018 10:53 | 1.3 | 1.7  | 5   | 20.2 | 20.1  | 69.8  | 1.8395 | 1.6 |
| 4/18/2018 10:54 | 1.8 | 2.2  | 2.4 | 19.7 | 23    | 70.2  | 1.7372 | 1.6 |
| 4/18/2018 10:55 | 1.6 | 0.7  | 0.7 | 17.2 | 47.7  | 208.9 | 1.333  | 1.5 |
| 4/18/2018 10:56 | 1.2 | 0.7  | 1.2 | 18   | 40.9  | 259.8 | 1.2483 | 1.5 |
| 4/18/2018 10:57 | 1   | 2.8  | 4.4 | 23   | 33.2  | 125.2 | 1.1078 | 1.7 |
| 4/18/2018 10:58 | 1.8 | 4.2  | 3.2 | 19.5 | 30.5  | 81.4  | 0.9483 | 1.9 |
| 4/18/2018 10:59 | 3   | 4.8  | 3.8 | 20.9 | 29.1  | 61.8  | 0.9474 | 2.2 |
| 4/18/2018 11:00 | 4.2 | 6.9  | 4.3 | 23.5 | 26.8  | 50.3  | 0.8186 | 2.4 |
| 4/18/2018 11:01 | 5.3 | 7.1  | 5.1 | 25   | 25.6  | 44.6  | 0.8357 | 2.5 |
| 4/18/2018 11:02 | 5.7 | 6    | 3.2 | 22.9 | 25.7  | 46    | 0.8092 | 2.8 |
| 4/18/2018 11:03 | 4.9 | 2.7  | 2.2 | 19.1 | 25.7  | 51.2  | 0.9394 | 2.8 |
| 4/18/2018 11:04 | 3.1 | 0    | 2.5 | 18   | 27.9  | 62.1  | 1.1065 | 2.2 |
| 4/18/2018 11:05 | 1.7 | 0.8  | 3   | 18.5 | 28.7  | 60.3  | 1.063  | 1.9 |
| 4/18/2018 11:06 | 0.8 | 1.2  | 2.9 | 18.4 | 28.3  | 56.3  | 1.0097 | 1.7 |
| 4/18/2018 11:07 | 0.7 | 0.5  | 2.4 | 18.3 | 27.3  | 50.9  | 0.9722 | 1.8 |
| 4/18/2018 11:08 | 0.7 | 1    | 2.4 | 18.2 | 27    | 49.4  | 0.9046 | 1.7 |
| 4/18/2018 11:09 | 1.1 | 2.3  | 3.2 | 19   | 25.1  | 39.8  | 0.8051 | 1.9 |
| 4/18/2018 11:10 | 1.2 | 1.5  | 2.9 | 18.5 | 24.9  | 38.8  | 0.8209 | 2   |
| 4/18/2018 11:11 | 1.1 | 0.5  | 1.4 | 18   | 26.2  | 38.4  | 0.8123 | 1.6 |
| 4/18/2018 11:12 | 0.7 | 0.2  | 2.1 | 18   | 25.9  | 38.1  | 0.8379 | 1.4 |
| 4/18/2018 11:13 | 0.4 | 0.2  | 2.3 | 18   | 25.7  | 38    | 0.8307 | 1.4 |
| 4/18/2018 11:14 | 0.4 | -0.3 | 1.9 | 17.7 | 25.8  | 38.1  | 0.8509 | 1.4 |
| 4/18/2018 11:15 | 0.3 | -0.3 | 2.7 | 21.6 | 38.2  | 54.3  | 0.9868 | 1.4 |
| 4/18/2018 11:16 | 0.3 | 0    | 2.4 | 21.2 | 53.8  | 186.5 | 1.0497 | 1.4 |
| 4/18/2018 11:17 | 0.2 | 0.2  | 3.9 | 22.4 | 68.3  | 268.3 | 1.2165 | 1.5 |
| 4/18/2018 11:18 | 0.2 | 0.5  | 3.3 | 23.6 | 83.4  | 343.1 | 1.4133 | 1.5 |
| 4/18/2018 11:19 | 0.2 | 0.3  | 3.3 | 25.1 | 92    | 396.6 | 2.2358 | 1.6 |
| 4/18/2018 11:20 | 0.2 | 0.3  | 2.9 | 26.7 | 102.4 | 438.5 | 3.4843 | 1.6 |
| 4/18/2018 11:21 | 0.2 | 0.6  | 4.6 | 27.2 | 103.9 | 457.2 | 4.2243 | 1.7 |
| 4/18/2018 11:22 | 0.2 | 0.7  | 3.7 | 27.5 | 101.5 | 430.3 | 4.8633 | 1.7 |
| 4/18/2018 11:23 | 0.2 | 0.7  | 1.8 | 27.9 | 100.1 | 432   | 5.6085 | 1.7 |
| 4/18/2018 11:24 | 0.2 | 0.2  | 2.7 | 27.8 | 97    | 410.3 | 6.1693 | 1.7 |
| 4/18/2018 11:25 | 0.2 | 0.6  | 5.2 | 28.4 | 96.8  | 415.6 | 6.9903 | 1.7 |
| 4/18/2018 11:26 | 0.2 | 0.4  | 4.7 | 27.9 | 97.8  | 429.8 | 7.458  | 1.7 |
| 4/18/2018 11:27 | 0.2 | 0.4  | 5   | 27.4 | 91.9  | 420.3 | 7.5792 | 1.7 |
| 4/18/2018 11:28 | 0.2 | 0.2  | 3.2 | 26.5 | 86.8  | 407.5 | 7.7973 | 1.7 |
| 4/18/2018 11:29 | 0.2 | 0.6  | 5.2 | 26   | 85.5  | 376.9 | 7.8978 | 1.8 |

|                 |     |      |     |      |      |       |        |     |
|-----------------|-----|------|-----|------|------|-------|--------|-----|
| 4/18/2018 11:30 | 0.2 | -0.5 | 4.2 | 26.1 | 84.4 | 384.8 | 8.1722 | 1.8 |
| 4/18/2018 11:31 | 0.2 | 0.2  | 3.7 | 26   | 85.4 | 393.1 | 8.6895 | 1.8 |
| 4/18/2018 11:32 | 0.2 | 0    | 3.2 | 25.5 | 82.3 | 400.7 | 8.4613 | 1.8 |
| 4/18/2018 11:33 | 0.2 | 0.3  | 2.9 | 25.1 | 79   | 369.3 | 8.2412 | 1.6 |
| 4/18/2018 11:34 | 0.2 | 0.1  | 4.3 | 25   | 78.3 | 347.5 | 8.405  | 1.6 |
| 4/18/2018 11:35 | 0.2 | 0.1  | 5.4 | 24.8 | 77.5 | 355.7 | 8.5742 | 1.6 |
| 4/18/2018 11:36 | 0.1 | -0.6 | 2.6 | 24.8 | 76   | 360.7 | 8.587  | 1.6 |
| 4/18/2018 11:37 | 0.1 | 0.4  | 3.2 | 24.5 | 74.3 | 360.4 | 8.5225 | 1.6 |
| 4/18/2018 11:38 | 0.1 | 0.4  | 2.8 | 24.3 | 74.4 | 368.1 | 8.8457 | 1.6 |
| 4/18/2018 11:39 | 0.1 | 0    | 3.5 | 24.4 | 74.9 | 365.7 | 9.101  | 1.6 |
| 4/18/2018 11:40 | 0.1 | 0    | 3.5 | 24.1 | 71.4 | 359.3 | 8.8589 | 1.6 |
| 4/18/2018 11:41 | 0   | 0.6  | 3.2 | 24.2 | 72.9 | 363.8 | 9.1831 | 1.6 |
| 4/18/2018 11:42 | 0.1 | 0.2  | 3.8 | 23.8 | 69.7 | 360.2 | 8.9034 | 1.6 |
| 4/18/2018 11:43 | 0.1 | 0.4  | 4.7 | 23.8 | 68.8 | 347.1 | 8.9027 | 1.6 |
| 4/18/2018 11:44 | 0.1 | 0.2  | 2.9 | 23.4 | 68.3 | 343.8 | 8.7752 | 1.6 |
| 4/18/2018 11:45 | 0   | 0.3  | 3.5 | 23.7 | 66.8 | 337.4 | 8.8377 | 1.7 |
| 4/18/2018 11:46 | 0   | 0.1  | 2.7 | 23.6 | 67.4 | 342.1 | 9.0413 | 1.7 |
| 4/18/2018 11:47 | 0   | 0.5  | 5.3 | 23   | 64.9 | 335.3 | 8.6199 | 1.6 |
| 4/18/2018 11:48 | 0   | 0.5  | 2.8 | 23   | 62.3 | 316.6 | 8.3958 | 1.6 |
| 4/18/2018 11:49 | 0   | 0.3  | 3.6 | 23.3 | 62.9 | 316.7 | 8.6131 | 1.6 |
| 4/18/2018 11:50 | 0   | -0.2 | 3   | 23   | 62.3 | 324.5 | 8.5233 | 1.6 |
| 4/18/2018 11:51 | 0   | -0.8 | 3.5 | 22.5 | 59.7 | 299.4 | 8.1563 | 1.6 |
| 4/18/2018 11:52 | 0   | 0.1  | 3.3 | 22.8 | 58.9 | 302.6 | 8.1927 | 1.6 |
| 4/18/2018 11:53 | 0   | -0.2 | 3   | 22.5 | 58   | 303.8 | 8.0808 | 1.6 |
| 4/18/2018 11:54 | 0   | 0.1  | 2.9 | 22   | 56.7 | 303.1 | 7.9874 | 1.6 |
| 4/18/2018 11:55 | 0   | 0.2  | 3.7 | 22.3 | 55.6 | 300.7 | 8.0137 | 1.6 |
| 4/18/2018 11:56 | 0   | 0    | 2.8 | 21.8 | 54.5 | 293.3 | 7.7433 | 1.6 |
| 4/18/2018 11:57 | 0.1 | -0.3 | 3.5 | 22.2 | 53.5 | 272.9 | 7.8842 | 1.6 |
| 4/18/2018 11:58 | 0.1 | 0.4  | 4.3 | 22.4 | 55.5 | 296.2 | 8.2201 | 1.6 |
| 4/18/2018 11:59 | 0.1 | 0.6  | 2.1 | 21.9 | 52.8 | 293.5 | 7.7194 | 1.6 |
| 4/18/2018 12:00 | 0.1 | 0.5  | 4.1 | 21.9 | 53.6 | 298.8 | 8.0038 | 1.6 |
| 4/18/2018 12:01 | 0.1 | 0    | 2.1 | 21.7 | 52.3 | 291.6 | 7.7768 | 1.6 |
| 4/18/2018 12:02 | 0.1 | 0.7  | 2.2 | 22.1 | 51.5 | 277.6 | 7.8307 | 1.5 |
| 4/18/2018 12:03 | 0.1 | 0.3  | 3.4 | 22.1 | 51.3 | 280.4 | 7.6162 | 1.6 |
| 4/18/2018 12:04 | 0.1 | 0.2  | 3.4 | 21.6 | 51.3 | 276.2 | 7.3009 | 1.6 |
| 4/18/2018 12:05 | 0.2 | 0    | 3.4 | 21.5 | 49.9 | 258.5 | 7.101  | 1.5 |
| 4/18/2018 12:06 | 0.2 | -0.4 | 3.3 | 21.6 | 47.1 | 263   | 7.2507 | 1.6 |
| 4/18/2018 12:07 | 0.2 | -0.4 | 1.6 | 21.8 | 48.2 | 276.4 | 7.623  | 1.6 |
| 4/18/2018 12:08 | 0.2 | 0    | 1.3 | 21.5 | 47.9 | 276.5 | 7.4859 | 1.6 |
| 4/18/2018 12:09 | 0.2 | 0.3  | 3   | 21.6 | 47.6 | 274.4 | 7.5278 | 1.6 |
| 4/18/2018 12:10 | 0.2 | -0.4 | 2.8 | 21.5 | 47.4 | 272.9 | 7.5119 | 1.6 |
| 4/18/2018 12:11 | 0.2 | 0.4  | 3.6 | 21.7 | 46.7 | 266.6 | 7.4624 | 1.6 |
| 4/18/2018 12:12 | 0.2 | -0.1 | 3.5 | 21.2 | 46.1 | 270.7 | 7.4089 | 1.6 |
| 4/18/2018 12:13 | 0.2 | -0.2 | 2   | 21.1 | 44.6 | 266.1 | 7.1682 | 1.6 |
| 4/18/2018 12:14 | 0.3 | -0.3 | 3.5 | 20.9 | 43.2 | 261.7 | 6.874  | 1.6 |
| 4/18/2018 12:15 | 0.3 | 1.1  | 2.4 | 21.2 | 42.1 | 237.1 | 6.8018 | 1.6 |
| 4/18/2018 12:16 | 0.3 | 0.3  | 3   | 21.4 | 42.9 | 252.6 | 7.0268 | 1.6 |

|                 |     |      |     |      |      |       |        |     |
|-----------------|-----|------|-----|------|------|-------|--------|-----|
| 4/18/2018 12:17 | 0.2 | 0.2  | 2.9 | 21.1 | 42   | 256.5 | 6.9101 | 1.6 |
| 4/18/2018 12:18 | 0.2 | 0.1  | 4.1 | 20.8 | 41.5 | 248.1 | 6.7638 | 1.7 |
| 4/18/2018 12:19 | 0.2 | 0.5  | 2.6 | 20.2 | 38.4 | 216.8 | 6.1432 | 1.6 |
| 4/18/2018 12:20 | 0.3 | 0.1  | 2.6 | 21.1 | 40.1 | 231.9 | 6.7508 | 1.6 |
| 4/18/2018 12:21 | 0.3 | -0.3 | 2.9 | 21.1 | 40.6 | 245.2 | 6.7978 | 1.6 |
| 4/18/2018 12:22 | 0.3 | -0.1 | 2   | 20.8 | 39.6 | 242.3 | 6.6553 | 1.7 |
| 4/18/2018 12:23 | 0.3 | 0.1  | 2.5 | 20.7 | 38   | 233.2 | 6.3375 | 1.7 |
| 4/18/2018 12:24 | 0.2 | 0.3  | 2   | 21.1 | 38.5 | 235.4 | 6.6346 | 1.7 |
| 4/18/2018 12:25 | 0.2 | 0.3  | 2.6 | 20.8 | 38.4 | 235.2 | 6.6082 | 1.8 |
| 4/18/2018 12:26 | 0.1 | 0    | 1   | 20.4 | 37.9 | 234.8 | 6.5037 | 1.8 |
| 4/18/2018 12:27 | 0.1 | 1    | 2.9 | 20.8 | 36   | 228   | 6.1388 | 1.8 |
| 4/18/2018 12:28 | 0.1 | 0.2  | 0.9 | 20.9 | 36.7 | 232.1 | 6.4688 | 1.8 |
| 4/18/2018 12:29 | 0.1 | -0.1 | 2.9 | 20.3 | 34.4 | 216.4 | 6.0726 | 1.7 |
| 4/18/2018 12:30 | 0.1 | 0.3  | 2.3 | 19.6 | 30.2 | 196.8 | 5.2688 | 1.8 |
| 4/18/2018 12:31 | 0.1 | 0.4  | 2.9 | 19.2 | 28.1 | 175.9 | 4.8666 | 1.7 |
| 4/18/2018 12:32 | 0.1 | -0.2 | 2.1 | 19.1 | 25.6 | 156.6 | 4.5458 | 1.7 |
| 4/18/2018 12:33 | 0.2 | 0.5  | 3.2 | 18.4 | 26.3 | 144.3 | 4.2275 | 1.6 |
| 4/18/2018 12:34 | 0.4 | 0.8  | 2.1 | 18.4 | 24.9 | 114   | 3.1996 | 1.7 |
| 4/18/2018 12:35 | 0.5 | 1.6  | 2.5 | 18.6 | 24.4 | 91.1  | 2.9205 | 1.8 |
| 4/18/2018 12:36 | 0.7 | 1    | 2.6 | 18.7 | 23.5 | 75.7  | 2.5945 | 1.7 |
| 4/18/2018 12:37 | 0.8 | 1.4  | 1.6 | 18.7 | 23.1 | 66.9  | 2.3728 | 1.5 |
| 4/18/2018 12:38 | 1   | 2.2  | 5.1 | 19.1 | 22.5 | 59.3  | 2.0923 | 1.4 |
| 4/18/2018 12:39 | 1.3 | 2.2  | 4   | 19.3 | 22.1 | 48.4  | 1.8655 | 1.4 |
| 4/18/2018 12:40 | 1.6 | 1.9  | 2.7 | 19.3 | 21.9 | 47    | 1.8295 | 1.6 |
| 4/18/2018 12:41 | 1.7 | 1.9  | 3.4 | 19.5 | 21.7 | 47.2  | 1.8168 | 1.6 |
| 4/18/2018 12:42 | 1.7 | 1.9  | 3.3 | 19.3 | 21.7 | 47.1  | 1.7255 | 1.6 |
| 4/18/2018 12:43 | 1.8 | 2.7  | 3.2 | 19.8 | 21.5 | 46.1  | 1.6123 | 1.5 |
| 4/18/2018 12:44 | 1.8 | 2.5  | 2.7 | 19.7 | 21.5 | 45.4  | 1.6418 | 1.4 |
| 4/18/2018 12:45 | 1.9 | 2.3  | 3.4 | 19.8 | 21.5 | 44.8  | 1.6966 | 1.5 |
| 4/18/2018 12:46 | 2   | 2.5  | 3.5 | 20.1 | 20.8 | 43.5  | 1.5042 | 1.5 |
| 4/18/2018 12:47 | 2.3 | 3    | 2.9 | 20.3 | 20.5 | 42    | 1.4515 | 1.5 |
| 4/18/2018 12:48 | 2.4 | 2.5  | 2.8 | 19.9 | 20.8 | 41    | 1.5443 | 1.4 |
| 4/18/2018 12:49 | 2.3 | 3.2  | 3.5 | 20.2 | 20.6 | 39.4  | 1.4284 | 1.5 |
| 4/18/2018 12:50 | 2.2 | 2.7  | 3   | 19.6 | 21.5 | 37.9  | 1.4653 | 1.5 |
| 4/18/2018 12:51 | 2.4 | 3.1  | 3.2 | 20.3 | 20.4 | 36.8  | 1.2902 | 1.5 |
| 4/18/2018 12:52 | 2.5 | 2.4  | 3.4 | 20.1 | 20.7 | 35.8  | 1.3818 | 1.6 |
| 4/18/2018 12:53 | 2.6 | 2.9  | 3.4 | 20.6 | 20.2 | 34.1  | 1.2626 | 1.6 |
| 4/18/2018 12:54 | 2.6 | 2.6  | 2.6 | 20.3 | 20.7 | 32.9  | 1.2931 | 1.6 |
| 4/18/2018 12:55 | 2.7 | 2.3  | 2.2 | 20   | 20.5 | 32    | 1.2498 | 1.5 |
| 4/18/2018 12:56 | 2.6 | 3.2  | 2.2 | 19.9 | 21   | 30.8  | 1.2252 | 1.5 |
| 4/18/2018 12:57 | 2.4 | 2.1  | 2.8 | 19.6 | 22   | 29.6  | 1.2111 | 1.5 |
| 4/18/2018 12:58 | 2.3 | 2.3  | 2.8 | 19.9 | 20.8 | 28.3  | 1.1231 | 1.4 |
| 4/18/2018 12:59 | 2.3 | 2.9  | 4.3 | 20   | 21.3 | 26.7  | 1.1039 | 1.4 |
| 4/18/2018 13:00 | 2.6 | 2.4  | 2.3 | 19.8 | 20.2 | 25.3  | 1.0208 | 1.4 |
| 4/18/2018 13:01 | 2.7 | 3.5  | 3   | 19.9 | 21.3 | 23.5  | 0.9877 | 1.4 |
| 4/18/2018 13:02 | 2.7 | 2.3  | 2.8 | 20.5 | 20.8 | 22.2  | 0.9552 | 1.4 |
| 4/18/2018 13:03 | 2.6 | 2.7  | 3.3 | 19.8 | 20.7 | 20.6  | 0.9479 | 1.5 |

|                 |     |      |      |      |       |       |        |     |
|-----------------|-----|------|------|------|-------|-------|--------|-----|
| 4/18/2018 13:04 | 2.6 | 2.3  | 3.3  | 20.3 | 21.7  | 19    | 0.8939 | 1.6 |
| 4/18/2018 13:05 | 2.6 | 2.7  | 2.4  | 20.3 | 21.7  | 17.4  | 0.8267 | 1.7 |
| 4/18/2018 13:06 | 2.8 | 3.7  | 3.6  | 20.8 | 21    | 15.9  | 0.8065 | 1.9 |
| 4/18/2018 13:07 | 3.1 | 3.3  | 3.5  | 20.9 | 19.4  | 14.5  | 0.7829 | 1.9 |
| 4/18/2018 13:08 | 3.3 | 4.1  | 3.2  | 21.2 | 19.5  | 13.2  | 0.7454 | 2   |
| 4/18/2018 13:09 | 3.5 | 4    |      | 21.9 | 18.4  | 12.2  | 0.6963 | 1.6 |
| 4/18/2018 13:10 | 3.9 | 4.6  |      | 22.1 | 17.6  | 11.1  | 0.6866 | 1.4 |
| 4/18/2018 13:11 | 4.2 | 5.2  |      | 21.7 | 17.8  | 10.2  | 0.6604 | 1.4 |
| 4/18/2018 13:12 | 4.4 | 5.1  | 9.1  | 22.4 | 17.5  | 9.2   | 0.6216 | 1.4 |
| 4/18/2018 13:13 | 4.6 | 6.1  | 4.2  | 22.8 | 17    | 8.4   | 0.5902 | 1.4 |
| 4/18/2018 13:14 | 4.9 | 6.5  |      | 23   | 16.4  | 7.6   | 0.5536 | 1.5 |
| 4/18/2018 13:15 | 5.3 | 7    | 4.7  | 23.3 | 15.8  | 6.8   | 0.5473 | 1.6 |
| 4/18/2018 13:16 | 5.7 | 6.8  | 5.8  | 23.6 | 15.5  | 6.2   | 0.5139 | 1.6 |
| 4/18/2018 13:17 | 6   | 7.1  | 5.6  | 24.1 | 15.1  | 5.6   | 0.5049 | 1.5 |
| 4/18/2018 13:18 | 6.2 | 7.6  |      | 24.3 | 14.5  | 5     | 0.4899 | 1.4 |
| 4/18/2018 13:19 | 6.5 | 8.1  | 5    | 24.6 | 13.9  | 4.6   | 0.4637 | 1.4 |
| 4/18/2018 13:20 | 6.8 | 8.7  | 5    | 24.7 | 13.3  | 4.2   | 0.4605 | 1.4 |
| 4/18/2018 13:21 | 7.1 | 8.6  | 5.3  | 25.1 | 12.9  | 3.9   | 0.4315 | 1.4 |
| 4/18/2018 13:22 | 7.3 | 8.9  |      | 25.6 | 12.7  | 3.7   | 0.4209 | 1.4 |
| 4/18/2018 13:23 | 7.7 | 9.2  |      | 25.6 | 12.4  | 3.5   | 0.4025 | 1.4 |
| 4/18/2018 13:24 | 7.9 | 9.1  |      | 26.2 | 11.9  | 3.3   | 0.3895 | 1.4 |
| 4/18/2018 13:25 | 8.2 | 9.4  | 12.3 | 26.1 | 11.4  | 3.1   | 0.3887 | 1.4 |
| 4/18/2018 13:26 | 8.4 | 9.5  | 5.1  | 26.6 | 10.8  | 3.1   | 0.3796 | 1.3 |
| 4/18/2018 13:27 | 8.7 | 9.8  |      | 26.8 | 10.1  | 3     | 0.3565 | 1.3 |
| 4/18/2018 13:28 | 8.8 | 9    |      | 25.9 | 10.5  | 2.9   | 0.3499 | 1.3 |
| 4/18/2018 13:29 | 8.8 | 9.4  |      | 26   | 10.6  | 2.8   | 0.3683 | 1.3 |
| 4/18/2018 13:30 | 8.4 | 8.8  |      | 25.5 | 10.8  | 2.7   | 0.3737 | 1.3 |
| 4/18/2018 13:31 | 8   | 7.7  | 8.5  | 25.1 | 10.9  | 2.7   | 0.3616 | 1.3 |
| 4/18/2018 13:32 | 7.4 | 7.6  | 4.4  | 25   | 11    | 2.7   | 0.3814 | 1.3 |
| 4/18/2018 13:33 | 7   | 7.2  | 4    | 24.4 | 11    | 2.7   | 0.374  | 1.3 |
| 4/18/2018 13:34 | 6.6 | 6.9  | 4.1  | 23.8 | 11.1  | 2.8   | 0.3878 | 1.3 |
| 4/18/2018 13:35 | 6.2 | 6.3  | 3.3  | 23.9 | 11.1  | 2.7   | 0.3909 | 1.3 |
| 4/18/2018 13:36 | 5.9 | 6.5  | 4.9  | 23.6 | 11    | 2.8   | 0.3897 | 1.3 |
| 4/18/2018 13:37 | 5.6 | 5.8  | 3.4  | 23   | 11.1  | 2.9   | 0.4104 | 1.3 |
| 4/18/2018 13:38 | 5.3 | 5.6  | 4.3  | 22.9 | 11.1  | 3     | 0.3983 | 1.4 |
| 4/18/2018 13:39 | 5   | 5.4  | 4.9  | 22.8 | 11.1  | 3     | 0.4047 | 1.4 |
| 4/18/2018 13:40 | 4.8 | 4.2  | 2.5  | 22.2 | 16.3  | 7.3   | 0.4247 | 1.3 |
| 4/18/2018 13:41 | 3.5 | 0.9  | 2.4  | 22.3 | 50.2  | 81.7  | 0.6559 | 1.4 |
| 4/18/2018 13:42 | 2   | 0.9  | 3    | 26.1 | 80.9  | 204.7 | 1.1827 | 1.4 |
| 4/18/2018 13:43 | 0.7 | 0.5  | 3    | 30.8 | 103   | 304.1 | 1.7157 | 1.5 |
| 4/18/2018 13:44 | 0.3 | 0.5  | 3.6  | 39.1 | 113.2 | 335.4 | 2.3752 | 1.6 |
| 4/18/2018 13:45 | 0.2 | 0    | 4.2  | 48.4 | 120.9 | 365.5 | 3.236  | 1.7 |
| 4/18/2018 13:46 | 0.2 | 0.5  | 3.1  | 54.9 | 124.3 | 387   | 4.1543 | 1.8 |
| 4/18/2018 13:47 | 0.2 | -0.2 | 5.4  | 65.1 | 123.1 | 385.9 | 5.5812 | 2   |
| 4/18/2018 13:48 | 0.2 | 0    | 4.4  | 64.7 | 121.9 | 381.1 | 6.0292 | 2.1 |
| 4/18/2018 13:49 | 0.2 | 0.4  | 4.9  | 67   | 117.6 | 380.2 | 6.9063 | 2.1 |
| 4/18/2018 13:50 | 0.2 | 0.6  | 7.5  | 64.1 | 113   | 374.4 | 7.4285 | 2.2 |

|                 |     |      |     |      |       |       |        |     |
|-----------------|-----|------|-----|------|-------|-------|--------|-----|
| 4/18/2018 13:51 | 0.2 | -0.6 | 5.3 | 63.7 | 109.6 | 364.2 | 7.7868 | 2.2 |
| 4/18/2018 13:52 | 0.2 | 0    | 4.3 | 63.3 | 107.4 | 361.8 | 8.3997 | 2.2 |
| 4/18/2018 13:53 | 0.2 | -0.5 | 6   | 58.7 | 100.6 | 351   | 8.1868 | 2.2 |
| 4/18/2018 13:54 | 0.2 | -0.4 | 3.9 | 60.1 | 103.4 | 346.1 | 8.9283 | 2.2 |
| 4/18/2018 13:55 | 0.2 | -0.4 | 3.5 | 59.7 | 102.4 | 352.2 | 9.2477 | 2.2 |
| 4/18/2018 13:56 | 0.1 | 0.5  | 5.8 | 58   | 99.9  | 346.3 | 9.452  | 2.2 |
| 4/18/2018 13:57 | 0.1 | 0.1  | 4.1 | 56.5 | 98.1  | 342.1 | 9.411  | 2.2 |
| 4/18/2018 13:58 | 0.1 | 0    | 5.1 | 54.9 | 95.7  | 334.9 | 9.505  | 2.1 |
| 4/18/2018 13:59 | 0.1 | -0.3 | 3.5 | 52.7 | 92.7  | 322.7 | 9.3948 | 2.1 |
| 4/18/2018 14:00 | 0.1 | 0.3  | 2.4 | 47.8 | 83.6  | 322.8 | 8.8717 | 2.1 |
| 4/18/2018 14:01 | 0.1 | 0.4  | 4.8 | 51.1 | 89.5  | 319   | 9.457  | 2.1 |
| 4/18/2018 14:02 | 0.1 | 0.4  | 4   | 51   | 89.8  | 325.6 | 9.9623 | 2.1 |
| 4/18/2018 14:03 | 0.2 | 0.3  | 3.3 | 47.9 | 86.8  | 315.9 | 9.723  | 2.1 |
| 4/18/2018 14:04 | 0.2 | 0.3  | 4   | 47   | 84.2  | 308.9 | 9.5805 | 2.1 |
| 4/18/2018 14:05 | 0.2 | 0.1  | 3.9 | 46.4 | 84.4  | 308   | 9.561  | 2.1 |
| 4/18/2018 14:06 | 0.2 | -0.9 | 3.4 | 44.1 | 84.2  | 303.8 | 9.1112 | 2.1 |
| 4/18/2018 14:07 | 0.2 | 0.2  | 4.5 | 43.9 | 83.6  | 300.2 | 9.28   | 2.1 |
| 4/18/2018 14:08 | 0.2 | 0.1  | 4.3 | 42.8 | 77.9  | 287.3 | 9.1275 | 2.1 |
| 4/18/2018 14:09 | 0.2 | -0.1 | 3   | 42   | 73.8  | 289.1 | 8.8305 | 2   |
| 4/18/2018 14:10 | 0.2 | 0.4  | 3.4 | 42.1 | 75.9  | 292.8 | 9.276  | 2   |
| 4/18/2018 14:11 | 0.2 | 0.2  | 4.3 | 40   | 72.5  | 285.5 | 8.773  | 2   |
| 4/18/2018 14:12 | 0.2 | 0.3  | 4.4 | 40.6 | 73    | 283.2 | 8.9707 | 2   |
| 4/18/2018 14:13 | 0.2 | -0.1 | 3.4 | 40.4 | 73    | 287.2 | 9.161  | 2.1 |
| 4/18/2018 14:14 | 0.2 | 0.2  | 4.4 | 38.1 | 67.6  | 268.7 | 8.4122 | 2.1 |
| 4/18/2018 14:15 | 0.2 | 0.9  | 3.7 | 38.3 | 69.4  | 274.2 | 8.7983 | 2   |
| 4/18/2018 14:16 | 0.3 | -0.1 | 3.4 | 38.5 | 67.2  | 276   | 8.5797 | 2   |
| 4/18/2018 14:17 | 0.3 | 0.1  | 3.4 | 38   | 67.9  | 274.7 | 8.677  | 2   |
| 4/18/2018 14:18 | 0.3 | 0    | 4.4 | 36.5 | 64.4  | 264   | 8.2145 | 2   |
| 4/18/2018 14:19 | 0.3 | 0.5  | 3.2 | 37   | 65.8  | 263.2 | 8.6312 | 2   |
| 4/18/2018 14:20 | 0.3 | 0    | 3.5 | 35.9 | 64.1  | 261.6 | 8.3775 | 2   |
| 4/18/2018 14:21 | 0.2 | -0.1 | 3.5 | 35.1 | 62.4  | 255.8 | 8.1593 | 2   |
| 4/18/2018 14:22 | 0.2 | 0.2  | 3.3 | 35.1 | 62.7  | 258.8 | 8.3578 | 2   |
| 4/18/2018 14:23 | 0.2 | 0.9  | 3.5 | 34.9 | 60.2  | 252.2 | 8.0565 | 2   |
| 4/18/2018 14:24 | 0.2 | -0.2 | 3.9 | 34.8 | 60.9  | 254.7 | 8.324  | 2   |
| 4/18/2018 14:25 | 0.1 | 0.5  | 2.9 | 33.8 | 59.2  | 245.9 | 8.0977 | 2   |
| 4/18/2018 14:26 | 0.1 | 0.3  | 3.1 | 31.2 | 55.9  | 228.1 | 7.4878 | 2   |
| 4/18/2018 14:27 | 0.1 | 0.2  | 4.5 | 32.2 | 54    | 219.6 | 7.4133 | 2   |
| 4/18/2018 14:28 | 0.1 | 0.1  | 1.7 | 31.6 | 53.7  | 229.9 | 7.3543 | 2   |
| 4/18/2018 14:29 | 0.1 | -0.1 | 2   | 32.4 | 54.8  | 235.2 | 7.681  | 2   |
| 4/18/2018 14:30 | 0.1 | 0.6  | 3.1 | 32.6 | 56.2  | 240.7 | 8.002  | 2   |
| 4/18/2018 14:31 | 0.1 | -0.1 | 4.6 | 32.2 | 54.9  | 233   | 7.7547 | 2.1 |
| 4/18/2018 14:32 | 0.1 | 0.5  | 3.9 | 31.3 | 53.1  | 228.5 | 7.5242 | 2   |
| 4/18/2018 14:33 | 0.1 | 0.5  | 3.7 | 31.4 | 52.8  | 227.4 | 7.5747 | 1.9 |
| 4/18/2018 14:34 | 0.2 | 0.8  | 4   | 31.5 | 52.4  | 227.6 | 7.6108 | 1.9 |
| 4/18/2018 14:35 | 0.2 | 0.4  | 2.1 | 30.4 | 50.9  | 223   | 7.3297 | 1.9 |
| 4/18/2018 14:36 | 0.2 | -0.2 | 3.2 | 29.8 | 48.9  | 217.1 | 7.0582 | 1.9 |
| 4/18/2018 14:37 | 0.2 | 0.6  | 3.9 | 30.2 | 49.3  | 216.9 | 7.2395 | 1.9 |



|                 |     |      |     |      |      |       |         |     |
|-----------------|-----|------|-----|------|------|-------|---------|-----|
| 4/18/2018 14:38 | 0.2 | 0.1  | 2.4 | 29.8 | 48.7 | 218.4 | 7.1488  | 1.9 |
| 4/18/2018 14:39 | 0.2 | -0.3 | 3.6 | 30   | 48.4 | 215.9 | 7.234   | 1.8 |
| 4/18/2018 14:40 | 0.2 | 0.7  | 2.2 | 30   | 47.7 | 214.2 | 7.1445  | 1.9 |
| 4/18/2018 14:41 | 0.2 | 0.6  | 2.8 | 29.8 | 47.5 | 216.3 | 7.1715  | 1.9 |
| 4/18/2018 14:42 | 0.2 | -0.2 | 1.1 | 29.3 | 46.9 | 216.7 | 7.1428  | 1.9 |
| 4/18/2018 14:43 | 0.2 | -0.2 | 3.5 | 27.7 | 44.2 | 205.7 | 6.5693  | 1.8 |
| 4/18/2018 14:44 | 0.2 | 0.3  | 5.5 | 27   | 42.8 | 195.9 | 6.38    | 1.9 |
| 4/18/2018 14:45 | 0.2 | 0.6  | 1.7 | 27.6 | 41.2 | 189.2 | 6.1935  | 1.9 |
| 4/18/2018 14:46 | 0.2 | 0.6  | 3.5 | 27.6 | 42.2 | 188.6 | 6.511   | 1.8 |
| 4/18/2018 14:47 | 0.2 | 0.1  | 3.1 | 26.9 | 41.2 | 195.6 | 6.2567  | 1.8 |
| 4/18/2018 14:48 | 0.3 | 0.1  | 1.9 | 27.2 | 41.3 | 194.6 | 6.415   | 1.8 |
| 4/18/2018 14:49 | 0.3 | 0.4  | 3.2 | 27.7 | 41.1 | 195.5 | 6.5465  | 1.8 |
| 4/18/2018 14:50 | 0.3 | 0.4  | 2.2 | 27.3 | 41.2 | 195.7 | 6.5652  | 1.8 |
| 4/18/2018 14:51 | 0.4 | 0.3  | 4   | 27   | 39.7 | 186.5 | 6.2663  | 1.8 |
| 4/18/2018 14:52 | 0.3 | 0.6  | 1.1 | 26.8 | 40   | 184.5 | 6.3125  | 1.8 |
| 4/18/2018 14:53 | 0.3 | 0.7  | 3.3 | 25.9 | 38.3 | 178.4 | 6.0265  | 1.7 |
| 4/18/2018 14:54 | 0.3 | 0.8  | 2   | 26.3 | 37.3 | 177.6 | 6.0188  | 1.8 |
| 4/18/2018 14:55 | 0.3 | 1.3  | 2   | 26.3 | 37.7 | 182   | 6.1602  | 1.8 |
| 4/18/2018 14:56 | 0.2 | 0.8  | 5.1 | 26.3 | 37.6 | 180.1 | 6.121   | 1.8 |
| 4/18/2018 14:57 | 0.2 | 0.5  | 2.9 | 26.4 | 37.2 | 178.6 | 4.1372  | 1.7 |
| 4/18/2018 14:58 | 0.2 | 0.1  | 3.4 | 25.6 | 36.1 | 178.2 | 0.3     | 1.4 |
| 4/18/2018 14:59 | 0.1 | 0.3  | 2.4 | 26   | 35.1 | 173.6 | -0.0472 | 1.4 |
| 4/18/2018 15:00 | 0.2 | 1.1  | 3.5 | 25.5 | 35.7 | 172.7 | -0.0439 | 1.4 |
| 4/18/2018 15:01 | 0.2 | 0.9  | 2.8 | 25.6 | 34.1 | 171.5 | -0.0641 | 1.4 |
| 4/18/2018 15:02 | 0.2 | 0.6  | 3.6 | 24.5 | 33.5 | 150.9 | -0.0439 | 1.4 |
| 4/18/2018 15:03 | 0.3 | 1.6  | 1.8 | 20.3 | 29.3 | 115.4 | -0.0552 | 1.4 |
| 4/18/2018 15:04 | 0.5 | 1.3  | 1   | 19.5 | 25   | 61.8  | -0.0555 | 1.4 |
| 4/18/2018 15:05 | 0.8 | 1.3  | 1.6 | 19.4 | 23.2 | 51.2  | -0.0448 | 1.4 |
| 4/18/2018 15:06 | 0.9 | 2    | 2.7 | 19   | 22.7 | 48.4  | -0.0567 | 1.4 |
| 4/18/2018 15:07 | 0.9 | 1.3  | 2.9 | 19.1 | 22.7 | 43.5  | -0.0463 | 1.4 |
| 4/18/2018 15:08 | 0.8 | 1.2  | 2.1 | 19.3 | 22.6 | 41.8  | -0.0607 | 1.4 |
| 4/18/2018 15:09 | 0.9 | 2    | 2   | 19.1 | 21   | 41.2  | -0.0322 | 1.4 |
| 4/18/2018 15:10 | 0.9 | 1.5  | 1.6 | 18.7 | 20.1 | 40.4  | 0.0133  | 1.4 |
| 4/18/2018 15:11 | 1.1 | 2.9  | 2.1 | 19.1 | 19.8 | 39    |         | 1.4 |
| 4/18/2018 15:12 | 1.1 | 1.8  | 0.8 | 19.3 | 20   | 37.8  |         | 1.5 |
| 4/18/2018 15:13 | 1.2 | 1.7  | 1.7 | 19.1 | 19.8 | 36.6  |         | 1.4 |
| 4/18/2018 15:14 | 1.2 | 1.5  | 1.8 | 19.3 | 19.1 | 34.7  |         | 1.4 |
| 4/18/2018 15:15 | 1.2 | 1.9  | 3   | 18.9 | 19.3 | 33.1  |         | 1.4 |
| 4/18/2018 15:16 | 1.3 | 2.2  | 2.6 | 19.3 | 19.1 | 31.4  |         | 1.5 |
| 4/18/2018 15:17 | 1.4 | 1.6  | 1.7 | 19.3 | 18.3 | 29.7  |         | 1.5 |
| 4/18/2018 15:18 | 1.5 | 2.1  | 2.1 | 19.7 | 18.2 | 28.2  |         | 1.4 |
| 4/18/2018 15:19 | 1.6 | 1.7  | 3.2 | 19.6 | 18   | 27.2  |         | 1.5 |
| 4/18/2018 15:20 | 1.6 | 2.2  | 2.6 | 19.2 | 17.5 | 26    |         | 1.5 |
| 4/18/2018 15:21 | 1.6 | 2.4  | 2.5 | 19.6 | 17.3 | 24.7  |         | 1.5 |
| 4/18/2018 15:22 | 1.6 | 2.1  | 2.1 | 19.7 | 17.1 | 23.9  |         | 1.6 |
| 4/18/2018 15:23 | 1.7 | 2.2  | 3.7 | 19.7 | 16.3 | 20    | 2.678   | 1.5 |
| 4/18/2018 15:24 | 2.2 | 7.1  | 8.1 | 24.7 | 16.2 | 16.5  | 1.178   | 1.4 |

|                 |     |      |      |      |        |     |
|-----------------|-----|------|------|------|--------|-----|
| 4/18/2018 15:25 |     |      | 16.1 | 16.6 | 1.094  | 1.5 |
| 4/18/2018 15:26 |     |      | 15.8 | 14.8 | 1.0573 | 1.5 |
| 4/18/2018 15:27 |     |      | 16.1 | 14.9 | 1.092  | 1.5 |
| 4/18/2018 15:28 |     |      | 16.2 | 15   | 1.1005 | 1.5 |
| 4/18/2018 15:29 |     |      | 15.5 | 15   | 1.0049 | 1.6 |
| 4/18/2018 15:30 |     |      | 15.2 | 14.8 | 0.9992 | 1.6 |
| 4/18/2018 15:31 |     |      | 14.7 | 14.5 | 0.9143 | 1.5 |
| 4/18/2018 15:32 |     |      | 15.1 | 14.4 | 0.9983 | 1.6 |
| 4/18/2018 15:33 |     |      | 14.8 | 14.1 | 0.9627 | 1.6 |
| 4/18/2018 15:34 |     |      | 14.7 | 13.8 | 0.9066 | 1.6 |
| 4/18/2018 15:35 |     |      | 14.5 | 13.3 | 0.8977 | 1.6 |
| 4/18/2018 15:36 |     |      | 14.8 | 12.8 | 0.928  | 1.6 |
| 4/18/2018 15:37 |     |      | 13.5 | 12.2 | 0.8067 | 1.6 |
| 4/18/2018 15:38 |     |      | 13.1 | 11.5 | 0.7259 | 1.6 |
| 4/18/2018 15:39 |     |      | 13.6 | 11   | 0.8038 | 1.6 |
| 4/18/2018 15:40 |     |      | 13.8 | 10.6 | 0.8268 | 1.6 |
| 4/18/2018 15:41 |     |      | 13   | 10.2 | 0.747  | 1.6 |
| 4/18/2018 15:42 |     |      | 12.4 | 9.6  | 0.7075 | 1.7 |
| 4/18/2018 15:43 |     |      | 12.8 | 9.2  | 0.7345 | 1.6 |
| 4/18/2018 15:44 |     |      | 12.9 | 8.8  | 0.7631 | 1.6 |
| 4/18/2018 15:45 |     |      | 12.7 | 8.6  | 0.7552 | 1.5 |
| 4/18/2018 15:46 |     |      | 12.1 | 8.5  | 0.6696 | 1.6 |
| 4/18/2018 15:47 |     |      | 12.2 | 8.4  | 0.6982 | 1.6 |
| 4/18/2018 15:48 |     |      | 12   | 8    | 0.6668 | 1.6 |
| 4/18/2018 15:49 |     |      | 11.3 | 7.6  | 0.6239 | 1.7 |
| 4/18/2018 15:50 |     |      | 11.3 | 7.4  | 0.6296 | 1.8 |
| 4/18/2018 15:51 |     |      | 11.2 | 7.1  | 0.607  | 1.8 |
| 4/18/2018 15:52 |     |      | 10.9 | 6.8  | 0.5937 | 1.9 |
| 4/18/2018 15:53 |     |      | 10.4 | 6.3  | 0.5502 | 2.4 |
| 4/18/2018 15:54 |     |      | 10.2 | 5.9  | 0.5481 | 2.7 |
| 4/18/2018 15:55 |     |      | 10.2 | 5.7  | 0.5528 | 2.8 |
| 4/18/2018 15:56 | 4.9 | 27   | 9.7  | 5.4  | 0.5354 | 2.7 |
| 4/18/2018 15:57 | 3.1 | 23.7 | 9.2  | 5.1  | 0.4699 | 3.1 |
| 4/18/2018 15:58 | 5.3 | 23   | 9.1  | 4.9  | 0.4814 | 3.2 |
| 4/18/2018 15:59 | 3.8 | 22.6 | 9    | 4.7  | 0.4887 | 2.6 |
| 4/18/2018 16:00 | 4.1 | 21.8 | 8.8  | 4.4  | 0.4578 | 1.4 |
| 4/18/2018 16:01 | 4.7 | 23   | 8.8  | 4.2  | 0.4671 | 1.4 |
| 4/18/2018 16:02 | 5.4 | 21.9 | 8.3  | 4.1  | 0.4325 | 1.4 |
| 4/18/2018 16:03 | 4   | 22   | 8.1  | 3.9  | 0.4337 | 1.4 |
| 4/18/2018 16:04 | 5.8 | 21.9 | 8.1  | 3.8  | 0.4338 | 1.5 |
| 4/18/2018 16:05 | 5.3 | 22.3 | 8    | 3.6  | 0.4266 | 1.7 |
| 4/18/2018 16:06 | 5   | 22.1 | 8    | 3.5  | 0.4343 | 1.9 |
| 4/18/2018 16:07 | 4.6 | 22.4 | 7.8  | 3.4  | 0.4132 | 2.1 |
| 4/18/2018 16:08 | 5.4 | 22.2 | 7.7  | 3.3  | 0.4127 | 2.2 |
| 4/18/2018 16:09 | 5.2 | 22.3 | 7.7  | 3.2  | 0.3711 | 2   |
| 4/18/2018 16:10 | 5.6 | 22.7 | 7.1  | 3.1  | 0.3695 | 1.4 |
| 4/18/2018 16:11 | 5   | 22.3 | 7.1  | 3.1  | 0.3887 | 1.3 |

|                 |     |      |     |     |        |     |
|-----------------|-----|------|-----|-----|--------|-----|
| 4/18/2018 16:12 | 5.6 | 22.6 | 6.8 | 3   | 0.3558 | 1.4 |
| 4/18/2018 16:13 | 5.8 | 22.5 | 6.5 | 2.9 | 0.3497 | 1.4 |
| 4/18/2018 16:14 | 5.4 | 23.3 | 6.4 | 2.8 | 0.3405 | 1.4 |
| 4/18/2018 16:15 | 6   | 23.4 | 6.3 | 2.7 | 0.3409 | 1.4 |
| 4/18/2018 16:16 | 5.3 | 23.7 | 6.4 | 2.6 | 0.3499 | 1.4 |
| 4/18/2018 16:17 | 4.9 | 23.3 | 6.1 | 2.5 | 0.3183 | 1.4 |
| 4/18/2018 16:18 | 5.1 | 23.5 | 6.1 | 2.5 | 0.3385 | 1.4 |
| 4/18/2018 16:19 | 6.9 | 23.1 | 6   | 2.4 | 0.3247 | 1.4 |
| 4/18/2018 16:20 | 4.9 | 23.6 | 5.7 | 2.3 | 0.3137 | 1.4 |
| 4/18/2018 16:21 | 6.4 | 23.7 | 5.7 | 2.3 | 0.3092 | 1.4 |
| 4/18/2018 16:22 | 5.3 | 24.2 | 5.7 | 2.3 | 0.3207 | 1.4 |
| 4/18/2018 16:23 | 4.4 | 24.3 | 5.6 | 2.3 | 0.2974 | 1.4 |
| 4/18/2018 16:24 | 6.5 | 24.4 | 5.4 | 2.2 | 0.2925 | 1.5 |
| 4/18/2018 16:25 | 5.8 | 24.2 | 5.3 | 2.2 | 0.2847 | 1.6 |
| 4/18/2018 16:26 | 6.1 | 24.4 | 5.1 | 2.1 | 0.2724 | 1.6 |
| 4/18/2018 16:27 | 5.8 | 24.6 | 5.1 | 2.1 | 0.296  | 1.6 |
| 4/18/2018 16:28 | 4.8 | 24.3 | 5   | 2.1 | 0.2606 | 1.7 |
| 4/18/2018 16:29 | 6.7 | 24.8 | 5   | 2.1 | 0.2887 | 1.7 |
| 4/18/2018 16:30 | 7.3 | 25   | 4.9 | 2.1 | 0.2654 | 1.6 |
| 4/18/2018 16:31 | 5.2 | 25   | 4.7 | 2   | 0.2602 | 1.5 |
| 4/18/2018 16:32 | 6.4 | 25.5 | 4.7 | 2   | 0.2637 | 1.5 |
| 4/18/2018 16:33 | 7.9 | 25.2 | 4.7 | 1.9 | 0.2481 | 1.6 |
| 4/18/2018 16:34 | 6.1 | 26.4 | 4.4 | 1.9 | 0.2392 | 1.7 |
| 4/18/2018 16:35 | 6.8 | 25.3 | 4.5 | 1.9 | 0.2327 | 1.7 |
| 4/18/2018 16:36 | 4.5 | 24.8 | 5.1 | 1.9 | 0.2907 | 1.8 |
| 4/18/2018 16:37 | 7   | 24.5 | 5.2 | 1.9 | 0.2734 | 1.8 |
| 4/18/2018 16:38 | 5.8 | 25.8 | 4.4 | 1.9 | 0.2403 | 1.8 |
| 4/18/2018 16:39 | 5.7 | 25.1 | 4.3 | 1.9 | 0.2433 | 1.8 |
| 4/18/2018 16:40 | 5.8 | 25.6 | 4.4 | 1.9 | 0.2371 | 1.8 |
| 4/18/2018 16:41 | 6.4 | 25.2 | 4.4 | 1.9 | 0.2544 | 1.9 |
| 4/18/2018 16:42 | 6.8 | 24.5 | 4.4 | 1.9 | 0.2459 | 1.9 |
| 4/18/2018 16:43 | 6.9 | 24.7 | 4.4 | 2   | 0.2509 | 1.9 |
| 4/18/2018 16:44 |     | 24.4 | 4.4 | 2   | 0.2416 | 1.9 |
| 4/18/2018 16:45 |     | 24.6 | 4.5 | 2   | 0.2598 | 1.8 |
| 4/18/2018 16:46 |     | 23.9 | 4.5 | 2.1 | 0.2539 | 1.9 |
| 4/18/2018 16:47 |     | 24.1 | 4.5 | 2.1 | 0.2624 | 1.9 |
| 4/18/2018 16:48 | 4.9 | 23.9 | 4.5 | 2.2 | 0.2585 | 2   |
| 4/18/2018 16:49 | 5.9 | 23.6 | 4.5 | 2.2 | 0.2534 | 2   |
| 4/18/2018 16:50 | 5.1 | 23.1 | 4.6 | 2.3 | 0.27   | 2   |
| 4/18/2018 16:51 | 9.1 | 23.1 | 4.5 | 2.4 | 0.251  | 2.1 |
| 4/18/2018 16:52 | 4.6 | 23.1 | 4.5 | 2.4 | 0.2625 | 2.1 |
| 4/18/2018 16:53 | 5.7 | 22.9 | 4.5 | 2.5 | 0.258  | 2.1 |
| 4/18/2018 16:54 | 4.3 | 23.1 | 4.6 | 2.5 | 0.2631 | 2.1 |
| 4/18/2018 16:55 | 5.4 | 22.6 | 4.5 | 2.6 | 0.2563 | 2.1 |
| 4/18/2018 16:56 | 4   | 22.5 | 4.5 | 2.6 | 0.2411 | 2.1 |
| 4/18/2018 16:57 | 4.5 | 22.2 | 4.5 | 2.6 | 0.2544 | 2.2 |
| 4/18/2018 16:58 | 4.1 | 22.5 | 4.5 | 2.6 | 0.2361 | 2.2 |

|                 |     |      |     |     |        |     |
|-----------------|-----|------|-----|-----|--------|-----|
| 4/18/2018 16:59 | 5.1 | 21.8 | 4.4 | 2.6 | 0.2312 | 2.2 |
| 4/18/2018 17:00 | 5   | 22.4 | 4.3 | 2.6 | 0.2236 | 2.3 |
| 4/18/2018 17:01 | 5   | 22.5 | 4.3 | 2.6 | 0.2273 | 2.3 |
| 4/18/2018 17:02 | 5   | 22.1 | 4.3 | 2.5 | 0.2347 | 2.3 |
| 4/18/2018 17:03 | 5.3 | 22.2 | 4.3 | 2.5 | 0.2307 | 2.3 |
| 4/18/2018 17:04 | 5.4 | 22.2 | 4.4 | 2.5 | 0.237  | 2.2 |
| 4/18/2018 17:05 | 2.8 | 21.8 | 4.4 | 2.5 | 0.227  | 2.1 |
| 4/18/2018 17:06 | 5   | 22.1 | 4.4 | 2.5 | 0.2325 | 2.1 |
| 4/18/2018 17:07 | 4.4 | 21.7 | 4.4 | 2.5 | 0.2161 | 2.2 |
| 4/18/2018 17:08 | 4.5 | 21.1 | 4.4 | 2.5 | 0.2474 | 2.2 |
| 4/18/2018 17:09 | 5.7 | 21.2 | 4.4 | 2.6 | 0.2578 | 2.2 |
| 4/18/2018 17:10 | 5.3 | 21   | 4.4 | 2.6 | 0.243  | 2.1 |
| 4/18/2018 17:11 | 4.4 | 20.9 | 4.4 | 2.7 | 0.2581 | 2.1 |
| 4/18/2018 17:12 | 3.6 | 21.1 | 4.4 | 2.8 | 0.24   | 2.2 |
| 4/18/2018 17:13 | 4.4 | 20.9 | 4.3 | 2.8 | 0.2565 | 2.2 |
| 4/18/2018 17:14 | 5.3 | 21.1 | 4.3 | 2.9 | 0.2416 | 2   |
| 4/18/2018 17:15 | 4.9 | 21   | 4.3 | 2.9 | 0.2513 | 2.1 |
| 4/18/2018 17:16 | 3.5 | 20.8 | 4.2 | 3   | 0.2435 | 2.2 |
| 4/18/2018 17:17 | 3.4 | 21.8 | 4.1 | 2.9 | 0.232  | 2.2 |
| 4/18/2018 17:18 | 4.1 | 21.6 | 4   | 2.9 | 0.2332 | 2.2 |
| 4/18/2018 17:19 | 5.3 | 22.2 | 4   | 2.8 | 0.2065 | 2.2 |
| 4/18/2018 17:20 | 4.1 | 22.4 | 3.9 | 2.7 | 0.2334 | 2.2 |
| 4/18/2018 17:21 | 4.4 | 21.7 | 3.9 | 2.7 | 0.2145 | 2.3 |
| 4/18/2018 17:22 | 5   | 22   | 3.9 | 2.6 | 0.2239 | 2.3 |
| 4/18/2018 17:23 | 3.9 | 21.2 | 3.9 | 2.6 | 0.2272 | 2.3 |
| 4/18/2018 17:24 | 4.4 | 20.8 | 4   | 2.6 | 0.2426 | 2.3 |
| 4/18/2018 17:25 | 2.8 | 20.8 | 4   | 2.6 | 0.246  | 2.3 |
| 4/18/2018 17:26 | 3.6 | 20.3 | 4.1 | 2.7 | 0.2338 | 2.3 |
| 4/18/2018 17:27 | 4.1 | 20.3 | 4.1 | 2.8 | 0.2646 | 2.3 |
| 4/18/2018 17:28 | 3   | 20.8 | 4.1 | 2.9 | 0.2445 | 2.4 |
| 4/18/2018 17:29 | 3.9 | 20.6 | 4   | 2.9 | 0.2463 | 2.3 |
| 4/18/2018 17:30 | 5.2 | 20.8 | 4   | 3   | 0.2303 | 2.4 |
| 4/18/2018 17:31 | 4.4 | 20.8 | 4   | 3.1 | 0.2358 | 2.4 |
| 4/18/2018 17:32 | 4.9 | 20.9 | 4   | 3.1 | 0.2381 | 2.5 |
| 4/18/2018 17:33 | 4.2 | 20.8 | 4   | 3.1 | 0.2263 | 2.5 |
| 4/18/2018 17:34 | 4.4 | 21.7 | 3.9 | 3.1 | 0.2289 | 2.4 |
| 4/18/2018 17:35 | 5.1 | 22   | 3.8 | 3   | 0.2076 | 2.5 |
| 4/18/2018 17:36 | 5.2 | 22.1 | 3.8 | 2.9 | 0.2156 | 2.5 |
| 4/18/2018 17:37 | 5.4 | 22.3 | 3.8 | 2.8 | 0.2042 | 2.4 |
| 4/18/2018 17:38 | 4.1 | 21.9 | 3.8 | 2.7 | 0.2141 | 2.4 |
| 4/18/2018 17:39 | 4.4 | 21.1 | 3.8 | 2.7 | 0.2154 | 2.4 |
| 4/18/2018 17:40 | 2.3 | 20.3 | 3.9 | 2.7 | 0.2328 | 2.4 |
| 4/18/2018 17:41 | 4.3 | 20.3 | 3.9 | 2.7 | 0.2418 | 2.3 |
| 4/18/2018 17:42 | 4.5 | 20.2 | 4   | 2.7 | 0.2359 | 2.3 |
| 4/18/2018 17:43 | 3.3 | 20.1 | 4   | 2.8 | 0.2435 | 2.3 |
| 4/18/2018 17:44 | 2.8 | 19.8 | 3.9 | 2.9 | 0.2328 | 2.3 |
| 4/18/2018 17:45 | 3.9 | 20.1 | 3.9 | 3   | 0.2402 | 2.3 |

|                 |     |      |     |     |        |     |
|-----------------|-----|------|-----|-----|--------|-----|
| 4/18/2018 17:46 | 4.2 | 20.2 | 3.9 | 3.1 | 0.2345 | 2.3 |
| 4/18/2018 17:47 | 4.6 | 20.5 | 3.8 | 3.2 | 0.2293 | 2.4 |
| 4/18/2018 17:48 | 3   | 20.4 | 3.8 | 3.2 | 0.2315 | 2.4 |
| 4/18/2018 17:49 | 4.2 | 20.5 | 3.8 | 3.2 | 0.2217 | 2.3 |
| 4/18/2018 17:50 | 3.9 | 20.7 | 3.8 | 3.2 | 0.2391 | 2.2 |
| 4/18/2018 17:51 | 1.8 | 21.4 | 3.7 | 3.2 | 0.207  | 2.2 |
| 4/18/2018 17:52 | 4.9 | 21.6 | 3.7 | 3.1 | 0.2222 | 2.3 |
| 4/18/2018 17:53 | 3.9 | 22.4 | 3.6 | 3   | 0.2055 | 2.3 |
| 4/18/2018 17:54 | 5.4 | 22   | 3.6 | 2.8 | 0.2069 | 2.3 |
| 4/18/2018 17:55 | 4.5 | 22.2 | 3.6 | 2.7 | 0.2083 | 2.2 |
| 4/18/2018 17:56 | 5   | 21.5 | 3.6 | 2.7 | 0.201  | 2.2 |
| 4/18/2018 17:57 | 4.5 | 20.3 | 3.6 | 2.7 | 0.2456 | 2.2 |
| 4/18/2018 17:58 | 4.7 | 20.2 | 3.7 | 2.7 | 0.2205 | 2.1 |
| 4/18/2018 17:59 | 4.5 | 20   | 3.7 | 2.7 | 0.241  | 2   |
| 4/18/2018 18:00 | 1.6 | 19.9 | 3.8 | 2.8 | 0.2281 | 2   |
| 4/18/2018 18:01 | 2.7 | 19.8 | 3.7 | 2.9 | 0.2411 | 2   |
| 4/18/2018 18:02 | 3.1 | 19.9 | 3.7 | 3.1 | 0.2382 | 2   |
| 4/18/2018 18:03 | 2.7 | 20.2 | 3.6 | 3.2 | 0.2228 | 2.1 |
| 4/18/2018 18:04 | 2.7 | 20.6 | 3.6 | 3.2 | 0.2345 | 2.1 |
| 4/18/2018 18:05 | 3.6 | 20.3 | 3.6 | 3.2 | 0.2141 | 2.2 |
| 4/18/2018 18:06 | 3.9 | 20.4 | 3.6 | 3.2 | 0.2296 | 2.1 |
| 4/18/2018 18:07 | 4.1 | 20.4 | 3.6 | 3.2 | 0.2116 | 2.1 |
| 4/18/2018 18:08 | 4.3 | 21.7 | 3.5 | 3.2 | 0.2114 | 2   |
| 4/18/2018 18:09 | 5.4 | 21.9 | 3.4 | 3.1 | 0.2118 | 1.9 |
| 4/18/2018 18:10 | 4.6 | 22.2 | 3.4 | 3   | 0.1943 | 2   |
| 4/18/2018 18:11 | 5.7 | 23   | 3.4 | 2.8 | 0.2052 | 2.1 |
| 4/18/2018 18:12 | 5.2 | 22.7 | 3.4 | 2.7 | 0.1942 | 2.2 |
| 4/18/2018 18:13 | 3.6 | 21.7 | 3.4 | 2.7 | 0.2121 | 2.3 |
| 4/18/2018 18:14 | 4.3 | 20.6 | 3.5 | 2.7 | 0.2207 | 2.3 |
| 4/18/2018 18:15 | 3.9 | 20.6 | 3.5 | 2.7 | 0.2216 | 2.3 |
| 4/18/2018 18:16 | 4.7 | 20   | 3.6 | 2.7 | 0.2271 | 2.3 |
| 4/18/2018 18:17 | 2.4 | 19.8 | 3.6 | 2.8 | 0.2263 | 2.3 |
| 4/18/2018 18:18 | 2.8 | 19.8 | 3.6 | 2.9 | 0.2369 | 2.2 |
| 4/18/2018 18:19 | 3.9 | 20.3 | 3.6 | 3.1 | 0.2167 | 2.3 |
| 4/18/2018 18:20 | 4   | 20.1 | 3.5 | 3.2 | 0.2308 | 2.4 |
| 4/18/2018 18:21 | 3.4 | 20.4 | 3.5 | 3.2 | 0.2154 | 2.4 |
| 4/18/2018 18:22 | 1.2 | 20.3 | 3.4 | 3.3 | 0.2254 | 2.4 |
| 4/18/2018 18:23 | 4.9 | 20.2 | 3.5 | 3.3 | 0.2222 | 2.2 |
| 4/18/2018 18:24 | 4.9 | 20.4 | 3.4 | 3.3 | 0.2184 | 2.2 |
| 4/18/2018 18:25 | 3.7 | 21.9 | 3.3 | 3.2 | 0.2178 | 2.3 |
| 4/18/2018 18:26 | 5.2 | 21.9 | 3.2 | 3.1 | 0.1967 | 2.2 |
| 4/18/2018 18:27 | 4.5 | 22.6 | 3.2 | 3   | 0.2017 | 2.3 |
| 4/18/2018 18:28 | 5.3 | 22.5 | 3.2 | 2.8 | 0.1872 | 2.4 |
| 4/18/2018 18:29 | 4.4 | 23   | 3.1 | 2.7 | 0.1959 | 2.4 |
| 4/18/2018 18:30 | 4.9 | 21.4 | 3.2 | 2.6 | 0.2036 | 2.4 |
| 4/18/2018 18:31 | 4   | 20.7 | 3.3 | 2.6 | 0.2188 | 2.4 |
| 4/18/2018 18:32 | 3.2 | 20.4 | 3.3 | 2.6 | 0.2197 | 2.1 |

|                 |     |      |     |     |        |     |
|-----------------|-----|------|-----|-----|--------|-----|
| 4/18/2018 18:33 | 3.1 | 19.8 | 3.4 | 2.7 | 0.2145 | 2.1 |
| 4/18/2018 18:34 | 2.8 | 20   | 3.4 | 2.8 | 0.2243 | 2.1 |
| 4/18/2018 18:35 | 2.4 | 20.1 | 3.4 | 2.9 | 0.2179 | 2.1 |
| 4/18/2018 18:36 | 1.7 | 20.2 | 3.4 | 3   | 0.2267 | 2   |
| 4/18/2018 18:37 | 3.9 | 19.9 | 3.3 | 3.2 | 0.2139 | 2   |
| 4/18/2018 18:38 | 3.1 | 20.3 | 3.3 | 3.3 | 0.2135 | 2.1 |
| 4/18/2018 18:39 | 4.2 | 20.4 | 3.2 | 3.3 | 0.218  | 2.2 |
| 4/18/2018 18:40 | 3.5 | 20.5 | 3.2 | 3.3 | 0.2028 | 2.3 |
| 4/18/2018 18:41 | 4   | 20.2 | 3.2 | 3.3 | 0.2257 | 2.3 |
| 4/18/2018 18:42 | 3.5 | 20.3 | 3.2 | 3.2 | 0.2077 | 2.4 |
| 4/18/2018 18:43 | 4.7 | 22.3 | 3   | 3.2 | 0.2068 | 2.4 |
| 4/18/2018 18:44 | 5.8 | 22.2 | 2.9 | 3.1 | 0.1966 | 2.5 |
| 4/18/2018 18:45 | 6.1 | 23.2 | 2.9 | 2.9 | 0.198  | 2.5 |
| 4/18/2018 18:46 | 4.5 | 23   | 2.8 | 2.8 | 0.197  | 2.5 |
| 4/18/2018 18:47 | 5.4 | 23   | 2.9 | 2.7 | 0.1919 | 2.5 |
| 4/18/2018 18:48 | 5.1 | 21.7 | 2.9 | 2.6 | 0.2021 | 2.4 |
| 4/18/2018 18:49 | 4.3 | 20.5 | 3.1 | 2.6 | 0.209  | 2.4 |
| 4/18/2018 18:50 | 5.5 | 20.9 | 3.1 | 2.6 | 0.2086 | 2.3 |
| 4/18/2018 18:51 | 3.5 | 20   | 3.1 | 2.6 | 0.2101 | 1.9 |
| 4/18/2018 18:52 | 4.2 | 19.9 | 3.2 | 2.7 | 0.2126 | 2.2 |
| 4/18/2018 18:53 | 3.4 | 19.9 | 3.1 | 2.9 | 0.2172 | 2.4 |
| 4/18/2018 18:54 | 3.7 | 20.2 | 3.1 | 3   | 0.2064 | 2.6 |
| 4/18/2018 18:55 | 3.9 | 20.2 | 3.1 | 3.1 | 0.2169 | 2.6 |
| 4/18/2018 18:56 | 3.3 | 20.5 | 3.1 | 3.2 | 0.2058 | 2.6 |
| 4/18/2018 18:57 | 3.2 | 21   | 3.1 | 3.2 | 0.2212 | 2.6 |
| 4/18/2018 18:58 | 4.1 | 21   | 3   | 3.2 | 0.2044 | 2.5 |
| 4/18/2018 18:59 | 5.4 | 22.2 | 2.9 | 3.1 | 0.1978 | 2.6 |
| 4/18/2018 19:00 | 5   | 22.3 | 2.9 | 3   | 0.2    | 2.5 |
| 4/18/2018 19:01 | 6.8 | 23   | 2.8 | 2.8 | 0.1788 | 1.9 |
| 4/18/2018 19:02 | 4.3 | 23.5 | 2.8 | 2.7 | 0.1989 | 1.5 |
| 4/18/2018 19:03 | 6.4 | 24.1 | 2.8 | 2.6 | 0.1758 | 1.6 |
| 4/18/2018 19:04 | 3.6 | 22   | 2.8 | 2.4 | 0.1993 | 1.8 |
| 4/18/2018 19:05 | 4.3 | 20.9 | 3   | 2.5 | 0.1985 | 1.9 |
| 4/18/2018 19:06 | 3.4 | 20.6 | 3   | 2.5 | 0.2121 | 2   |
| 4/18/2018 19:07 | 1.8 | 20   | 3   | 2.6 | 0.2121 | 2.1 |
| 4/18/2018 19:08 | 3.4 | 19.7 | 3   | 2.7 | 0.2128 | 2   |
| 4/18/2018 19:09 | 2.7 | 20   | 3   | 2.8 | 0.2168 | 2   |
| 4/18/2018 19:10 | 3.9 | 20   | 3   | 3   | 0.2024 | 2.1 |
| 4/18/2018 19:11 | 4.2 | 20.2 | 3   | 3.1 | 0.2181 | 2.1 |
| 4/18/2018 19:12 | 4.1 | 20.7 | 3   | 3.3 | 0.1934 | 2.3 |
| 4/18/2018 19:13 | 4.2 | 20.3 | 3   | 3.3 | 0.2131 | 2.3 |
| 4/18/2018 19:14 | 3.3 | 20.8 | 3   | 3.3 | 0.2112 | 2.3 |
| 4/18/2018 19:15 | 5.3 | 22.4 | 3   | 3.2 | 0.1831 | 2.3 |
| 4/18/2018 19:16 | 4.5 | 23   | 2.9 | 3.1 | 0.1941 | 2.4 |
| 4/18/2018 19:17 | 7.6 | 24.2 | 2.9 | 2.9 | 0.1743 | 2.5 |
| 4/18/2018 19:18 | 5.2 | 24.4 | 2.9 | 2.7 | 0.1878 | 2.5 |
| 4/18/2018 19:19 | 5.8 | 25.1 | 3   | 2.6 | 0.1863 | 2.5 |

|                 |     |      |     |     |        |     |
|-----------------|-----|------|-----|-----|--------|-----|
| 4/18/2018 19:20 | 5   | 23.3 | 3   | 2.5 | 0.1873 | 2.5 |
| 4/18/2018 19:21 |     | 21.4 | 3   | 2.5 | 0.2006 | 2.5 |
| 4/18/2018 19:22 | 3.5 | 20.9 | 3.1 | 2.4 | 0.1965 | 2.4 |
| 4/18/2018 19:23 | 2.9 | 20.7 | 3.1 | 2.5 | 0.2059 | 2.5 |
| 4/18/2018 19:24 |     | 20.3 | 3.1 | 2.6 | 0.1944 | 2.5 |
| 4/18/2018 19:25 | 3.2 | 20.2 | 3.1 | 2.7 | 0.2071 | 2.6 |
| 4/18/2018 19:26 | 2.5 | 20.5 | 3.1 | 2.8 | 0.2002 | 2.5 |
| 4/18/2018 19:27 | 3.5 | 21.3 | 3.2 | 2.9 | 0.1944 | 2.5 |
| 4/18/2018 19:28 |     | 21.9 | 3.3 | 3   | 0.1965 | 2.5 |
| 4/18/2018 19:29 |     | 21.5 | 3.3 | 3   | 0.1901 | 2.6 |
| 4/18/2018 19:30 | 5   | 21.8 | 3.3 | 2.9 | 0.2072 | 2.6 |
| 4/18/2018 19:31 | 7.8 | 22.8 | 3.6 | 2.9 | 0.1872 | 2.5 |
| 4/18/2018 19:32 |     | 24.3 | 3.9 | 2.8 | 0.1928 | 2.4 |
| 4/18/2018 19:33 | 5.9 | 25   | 3.9 | 2.6 | 0.1759 | 2.3 |
| 4/18/2018 19:34 |     | 25.5 | 4.1 | 2.5 | 0.1817 | 2.3 |
| 4/18/2018 19:35 |     | 23.3 | 3.9 | 2.4 | 0.1859 | 2.5 |
| 4/18/2018 19:36 | 3.2 | 21.4 | 3.4 | 2.4 | 0.2044 | 2.5 |
| 4/18/2018 19:37 | 4.9 | 21.6 | 3.4 | 2.4 | 0.2113 | 2.4 |
| 4/18/2018 19:38 |     | 21   | 3.4 | 2.4 | 0.1959 | 2.3 |
| 4/18/2018 19:39 | 4.6 | 20.1 | 3.3 | 2.5 | 0.2139 | 2.3 |
| 4/18/2018 19:40 | 5.9 | 20.4 | 3.3 | 2.6 | 0.1945 | 2.3 |
| 4/18/2018 19:41 | 4.8 | 20.6 | 3.3 | 2.7 | 0.2124 | 2.3 |
| 4/18/2018 19:42 | 3.8 | 20.5 | 3.2 | 2.9 | 0.1988 | 2.3 |
| 4/18/2018 19:43 | 3.7 | 20.8 | 3.3 | 3   | 0.2075 | 2.4 |
| 4/18/2018 19:44 | 3.9 | 21.6 | 3.5 | 3   | 0.2016 | 2.3 |
| 4/18/2018 19:45 |     | 21.4 | 3.5 | 3   | 0.193  | 2.4 |
| 4/18/2018 19:46 | 4.5 | 21.5 | 3.5 | 3   | 0.1981 | 2.3 |
| 4/18/2018 19:47 | 4.5 | 22   | 3.4 | 2.9 | 0.188  | 2.3 |
| 4/18/2018 19:48 | 4.8 | 22.5 | 3.6 | 2.9 | 0.186  | 2.2 |
| 4/18/2018 19:49 | 6.2 | 24.2 | 3.7 | 2.7 | 0.1795 | 2   |
| 4/18/2018 19:50 | 6   | 25   | 3.7 | 2.6 | 0.1823 | 2.1 |
| 4/18/2018 19:51 | 7.1 | 25.8 | 3.8 | 2.4 | 0.1833 | 2.2 |
| 4/18/2018 19:52 | 8.4 | 25.6 | 3.8 | 2.3 | 0.1702 | 2.2 |
| 4/18/2018 19:53 | 4.5 | 23   | 3.6 | 2.2 | 0.1837 | 2.2 |
| 4/18/2018 19:54 | 2.1 | 21.3 | 3.4 | 2.3 | 0.184  | 2.3 |
| 4/18/2018 19:55 | 3.4 | 21.4 | 3.3 | 2.3 | 0.1957 | 2.4 |
| 4/18/2018 19:56 | 4.1 | 20.8 | 3.4 | 2.3 | 0.1866 | 2.4 |
| 4/18/2018 19:57 | 4.2 | 20.8 | 3.3 | 2.3 | 0.1879 | 2.4 |
| 4/18/2018 19:58 | 2.9 | 20.6 | 3.3 | 2.5 | 0.1981 | 2.6 |
| 4/18/2018 19:59 | 4.3 | 20.6 | 3.2 | 2.6 | 0.1837 | 2.8 |
| 4/18/2018 20:00 | 4.3 | 20.9 | 3.3 | 2.7 | 0.1931 | 2.8 |
| 4/18/2018 20:01 | 5.1 | 21.3 | 3.2 | 2.9 | 0.1852 | 2.9 |
| 4/18/2018 20:02 | 4.5 | 21.5 | 3.3 | 2.9 | 0.1935 | 2.9 |
| 4/18/2018 20:03 | 4.3 | 21.4 | 3.3 | 2.9 | 0.1851 | 2.8 |
| 4/18/2018 20:04 | 5.8 | 21.8 | 3.3 | 2.9 | 0.196  | 2.8 |
| 4/18/2018 20:05 | 5.4 | 22.6 | 3.3 | 2.8 | 0.1873 | 2.8 |
| 4/18/2018 20:06 | 6.6 | 24.6 | 3.4 | 2.7 | 0.1724 | 2.8 |

|                 |     |      |     |     |        |     |
|-----------------|-----|------|-----|-----|--------|-----|
| 4/18/2018 20:07 | 6.1 | 25.3 | 3.4 | 2.6 | 0.1792 | 2.9 |
| 4/18/2018 20:08 | 6.2 | 25.5 | 3.4 | 2.4 | 0.1668 | 2.9 |
| 4/18/2018 20:09 | 4.8 | 23.5 | 3.3 | 2.3 | 0.1816 | 2.8 |
| 4/18/2018 20:10 | 4   | 21.5 | 3.2 | 2.3 | 0.1842 | 2.7 |
| 4/18/2018 20:11 | 4   | 21.7 | 3.2 | 2.3 | 0.1919 | 2.4 |
| 4/18/2018 20:12 | 4.6 | 21   | 3.3 | 2.3 | 0.1924 | 2.3 |
| 4/18/2018 20:13 | 3.7 | 20.8 | 3.3 | 2.3 | 0.1838 | 2.2 |
| 4/18/2018 20:14 | 4.2 | 20.5 | 3.3 | 2.4 | 0.1964 | 2.2 |
| 4/18/2018 20:15 | 5.1 | 20.5 | 3.3 | 2.5 | 0.1839 | 2.3 |
| 4/18/2018 20:16 | 4.9 | 21.4 | 3.3 | 2.6 | 0.1911 | 2.4 |
| 4/18/2018 20:17 | 3.8 | 21.3 | 3.3 | 2.7 | 0.177  | 2.4 |
| 4/18/2018 20:18 | 3.7 | 21.7 | 3.3 | 2.8 | 0.1957 | 2.4 |
| 4/18/2018 20:19 | 4.4 | 21.1 | 3.3 | 2.8 | 0.1903 | 2.4 |
| 4/18/2018 20:20 | 4.7 | 22.5 | 3.4 | 2.7 | 0.1792 | 2.4 |
| 4/18/2018 20:21 | 5.4 | 24.2 | 3.4 | 2.7 | 0.1819 | 2.4 |
| 4/18/2018 20:22 | 4   | 24.8 | 3.4 | 2.5 | 0.1633 | 2.4 |
| 4/18/2018 20:23 | 5.4 | 24.8 | 3.4 | 2.4 | 0.1828 | 2.4 |
| 4/18/2018 20:24 | 5.6 | 23.4 | 3.4 | 2.4 | 0.1742 | 2.5 |
| 4/18/2018 20:25 | 3.7 | 21   | 3.3 | 2.4 | 0.1919 | 2.5 |
| 4/18/2018 20:26 | 4.9 | 21.7 | 3.3 | 2.3 | 0.1796 | 2.5 |
| 4/18/2018 20:27 | 5.1 | 21.3 | 3.3 | 2.3 | 0.1867 | 2.5 |
| 4/18/2018 20:28 | 3.3 | 21   | 3.3 | 2.3 | 0.194  | 2.4 |
| 4/18/2018 20:29 | 3.4 | 20.8 | 3.2 | 2.4 | 0.1808 | 2.4 |
| 4/18/2018 20:30 | 5.3 | 20.9 | 3.2 | 2.5 | 0.1896 | 2.4 |
| 4/18/2018 20:31 | 3.1 | 21.1 | 3.2 | 2.6 | 0.1827 | 2.4 |
| 4/18/2018 20:32 | 4   | 21.3 | 3.2 | 2.7 | 0.1915 | 2.4 |
| 4/18/2018 20:33 | 4.2 | 21.4 | 3.3 | 2.7 | 0.1798 | 2.3 |
| 4/18/2018 20:34 | 5.1 | 21.6 | 3.3 | 2.7 | 0.184  | 2.4 |
| 4/18/2018 20:35 | 3.5 | 21.6 | 3.3 | 2.7 | 0.1792 | 2.4 |
| 4/18/2018 20:36 | 3.9 | 22.1 | 3.3 | 2.7 | 0.1786 | 2.3 |
| 4/18/2018 20:37 | 5.3 | 22.5 | 3.3 | 2.7 | 0.1872 | 2.1 |
| 4/18/2018 20:38 | 4.8 | 24.5 | 3.4 | 2.5 | 0.1666 | 2   |
| 4/18/2018 20:39 | 5.3 | 25.4 | 3.5 | 2.4 | 0.1763 | 2   |
| 4/18/2018 20:40 | 7.4 | 25.3 | 3.6 | 2.3 | 0.1683 | 2   |
| 4/18/2018 20:41 | 4.8 | 22.6 | 3.4 | 2.3 | 0.1764 | 2   |
| 4/18/2018 20:42 | 5   | 21.1 | 3.2 | 2.3 | 0.1843 | 2.1 |
| 4/18/2018 20:43 | 4.5 | 21.8 | 3.4 | 2.3 | 0.1802 | 2   |
| 4/18/2018 20:44 | 3.3 | 20.9 | 3.3 | 2.3 | 0.1906 | 1.7 |
| 4/18/2018 20:45 | 4.7 | 20.9 | 3.2 | 2.3 | 0.1729 | 1.6 |
| 4/18/2018 20:46 | 5.1 | 20.8 | 3.2 | 2.4 | 0.1867 | 1.7 |
| 4/18/2018 20:47 | 2.3 | 20.7 | 3.2 | 2.5 | 0.1804 | 1.7 |
| 4/18/2018 20:48 | 4.3 | 20.9 | 3.2 | 2.6 | 0.1876 | 1.8 |
| 4/18/2018 20:49 | 4.4 | 20.9 | 3.3 | 2.7 | 0.1802 | 1.8 |
| 4/18/2018 20:50 | 3.7 | 21.3 | 3.3 | 2.7 | 0.1767 | 1.8 |
| 4/18/2018 20:51 | 4.7 | 21.6 | 3.4 | 2.7 | 0.1853 | 1.8 |
| 4/18/2018 20:52 | 3.7 | 21.9 | 3.4 | 2.7 | 0.1676 | 1.8 |
| 4/18/2018 20:53 | 5.4 | 21.9 | 3.5 | 2.7 | 0.1793 | 1.7 |



|                 |     |      |     |     |        |     |
|-----------------|-----|------|-----|-----|--------|-----|
| 4/18/2018 20:54 | 5.8 | 22.2 | 3.5 | 2.6 | 0.1829 | 1.7 |
| 4/18/2018 20:55 | 4.4 | 22   | 3.4 | 2.6 | 0.1767 | 1.7 |
| 4/18/2018 20:56 | 6   | 21.9 | 3.5 | 2.5 | 0.1806 | 1.7 |
| 4/18/2018 20:57 | 5   | 24.5 | 3.6 | 2.4 | 0.1713 | 1.7 |
| 4/18/2018 20:58 | 5.2 | 24.4 | 3.7 | 2.3 | 0.1724 | 1.7 |
| 4/18/2018 20:59 | 4.3 | 22.5 | 3.5 | 2.2 | 0.1672 | 1.8 |
| 4/18/2018 21:00 | 5.6 | 21.5 | 3.3 | 2.3 | 0.1872 | 1.8 |
| 4/18/2018 21:01 | 3.2 | 21.2 | 3.4 | 2.3 | 0.1816 | 1.8 |
| 4/18/2018 21:02 | 4   | 20.9 | 3.3 | 2.3 | 0.1719 | 1.8 |
| 4/18/2018 21:03 | 3.2 | 20.8 | 3.2 | 2.4 | 0.1871 | 1.8 |
| 4/18/2018 21:04 | 2.5 | 20.7 | 3.2 | 2.4 | 0.1699 | 1.9 |
| 4/18/2018 21:05 | 3.6 | 20.6 | 3.2 | 2.5 | 0.1873 | 1.9 |
| 4/18/2018 21:06 | 3.9 | 20.5 | 3.2 | 2.5 | 0.1768 | 1.9 |
| 4/18/2018 21:07 | 4.2 | 21.2 | 3.3 | 2.6 | 0.1803 | 2   |
| 4/18/2018 21:08 | 5.1 | 21.4 | 3.3 | 2.6 | 0.1731 | 2   |
| 4/18/2018 21:09 | 4.4 | 21.8 | 3.3 | 2.6 | 0.168  | 2   |
| 4/18/2018 21:10 | 4.7 | 21.8 | 3.3 | 2.6 | 0.1806 | 2.1 |
| 4/18/2018 21:11 | 4.4 | 21.5 | 3.3 | 2.5 | 0.1682 | 2.1 |
| 4/18/2018 21:12 | 4.8 | 21.7 | 3.3 | 2.5 | 0.1813 | 2   |
| 4/18/2018 21:13 | 2.8 | 21.7 | 3.2 | 2.4 | 0.1689 | 2   |
| 4/18/2018 21:14 | 4.5 | 20.8 | 3.3 | 2.4 | 0.1797 | 2   |
| 4/18/2018 21:15 | 4.7 | 21.1 | 3.2 | 2.4 | 0.1801 | 2.1 |
| 4/18/2018 21:16 | 5.1 | 20.7 | 3.3 | 2.4 | 0.1744 | 2.2 |
| 4/18/2018 21:17 | 3.9 | 20.7 | 3.2 | 2.5 | 0.182  | 2.2 |
| 4/18/2018 21:18 | 4.3 | 20.8 | 3.2 | 2.5 | 0.164  | 2.1 |
| 4/18/2018 21:19 | 2.9 | 20.6 | 3.2 | 2.5 | 0.1794 | 2.1 |
| 4/18/2018 21:20 | 2.7 | 20.5 | 3.2 | 2.5 | 0.1606 | 2.2 |
| 4/18/2018 21:21 | 4.3 | 20.5 | 3.2 | 2.6 | 0.1753 | 2.2 |
| 4/18/2018 21:22 | 2.8 | 20.6 | 3.2 | 2.6 | 0.1828 | 2.2 |
| 4/18/2018 21:23 | 3.5 | 20.6 | 3.2 | 2.6 | 0.166  | 2.1 |
| 4/18/2018 21:24 | 5.5 | 20.8 | 3.2 | 2.6 | 0.1797 | 2.1 |
| 4/18/2018 21:25 | 5.5 | 21.3 | 3.2 | 2.6 | 0.1645 | 2.1 |
| 4/18/2018 21:26 | 3.9 | 21.4 | 3.2 | 2.6 | 0.1729 | 2.1 |
| 4/18/2018 21:27 | 4.2 | 21   | 3.1 | 2.6 | 0.1682 | 2.2 |
| 4/18/2018 21:28 | 4.3 | 21.3 | 3.1 | 2.5 | 0.1706 | 2.1 |
| 4/18/2018 21:29 | 4.8 | 21.2 | 3.1 | 2.5 | 0.1782 | 2.1 |
| 4/18/2018 21:30 | 5   | 21.2 | 3.1 | 2.5 | 0.1652 | 2   |
| 4/18/2018 21:31 | 4.6 | 21   | 3.1 | 2.5 | 0.1794 | 1.6 |
| 4/18/2018 21:32 | 3.5 | 20.7 | 3.1 | 2.5 | 0.1702 | 1.7 |
| 4/18/2018 21:33 | 5.1 | 21.2 | 3.1 | 2.5 | 0.1774 | 1.9 |
| 4/18/2018 21:34 | 4.1 | 21.4 | 3.1 | 2.5 | 0.171  | 2.1 |
| 4/18/2018 21:35 | 3.5 | 20.7 | 3.1 | 2.5 | 0.1725 | 2.1 |
| 4/18/2018 21:36 | 4.4 | 20.1 | 3.1 | 2.5 | 0.1761 | 2   |
| 4/18/2018 21:37 | 2.5 | 20.5 | 3.1 | 2.5 | 0.1663 | 1.9 |
| 4/18/2018 21:38 | 3.4 | 21   | 3.1 | 2.6 | 0.1815 | 2   |
| 4/18/2018 21:39 | 4.8 | 20.5 | 3.1 | 2.6 | 0.1682 | 2.1 |
| 4/18/2018 21:40 | 2.9 | 20.6 | 3   | 2.6 | 0.1715 | 2.1 |

|                 |     |      |     |     |        |     |
|-----------------|-----|------|-----|-----|--------|-----|
| 4/18/2018 21:41 | 3.2 | 20.5 | 3.1 | 2.6 | 0.1708 | 2.2 |
| 4/18/2018 21:42 | 3.2 | 20.8 | 3.1 | 2.6 | 0.1691 | 2.2 |
| 4/18/2018 21:43 | 5   | 21.1 | 3.1 | 2.6 | 0.1768 | 2.3 |
| 4/18/2018 21:44 | 4.3 | 21.7 | 3.1 | 2.6 | 0.1583 | 2.3 |
| 4/18/2018 21:45 | 5.2 | 21.4 | 3.1 | 2.6 | 0.1773 | 2.3 |
| 4/18/2018 21:46 | 5.2 | 21.4 | 3.1 | 2.5 | 0.1665 | 1.9 |
| 4/18/2018 21:47 | 3.8 | 21.4 | 3.2 | 2.5 | 0.1684 | 1.5 |
| 4/18/2018 21:48 | 4   | 21.3 | 3.2 | 2.4 | 0.1796 | 1.6 |
| 4/18/2018 21:49 | 4.9 | 21.4 | 3.2 | 2.4 | 0.1595 | 1.8 |
| 4/18/2018 21:50 | 4.7 | 21.2 | 3.2 | 2.4 | 0.1789 | 2   |
| 4/18/2018 21:51 | 2.8 | 21.2 | 3.3 | 2.4 | 0.1614 | 1.4 |
| 4/18/2018 21:52 | 4   | 20.8 | 3.2 | 2.4 | 0.1751 | 1.4 |
| 4/18/2018 21:53 | 4.3 | 20.6 | 3.2 | 2.4 | 0.165  | 1.4 |
| 4/18/2018 21:54 | 4.3 | 20.6 | 3.1 | 2.4 | 0.1737 | 1.5 |
| 4/18/2018 21:55 | 3.5 | 20.6 | 3.1 | 2.4 | 0.166  | 1.7 |
| 4/18/2018 21:56 | 4.2 | 20.9 | 3.2 | 2.5 | 0.1652 | 1.6 |
| 4/18/2018 21:57 | 3.9 | 21.1 | 3.3 | 2.5 | 0.1768 | 1.6 |
| 4/18/2018 21:58 | 4.8 | 21.2 | 3.5 | 2.5 | 0.1597 | 1.7 |
| 4/18/2018 21:59 | 3.2 | 21.1 | 3.4 | 2.5 | 0.1671 | 1.6 |
| 4/18/2018 22:00 | 3.9 | 20.9 | 3.4 | 2.4 | 0.1685 | 1.6 |
| 4/18/2018 22:01 | 4.8 | 21.1 | 3.3 | 2.4 | 0.1683 | 1.6 |
| 4/18/2018 22:02 | 4.4 | 21.5 | 3.4 | 2.4 | 0.1679 | 1.5 |
| 4/18/2018 22:03 | 4.9 | 21.5 | 3.4 | 2.4 | 0.1608 | 1.6 |
| 4/18/2018 22:04 | 4.2 | 21.6 | 3.5 | 2.3 | 0.1694 | 1.6 |
| 4/18/2018 22:05 | 5   | 21.1 | 3.4 | 2.3 | 0.1665 | 1.6 |
| 4/18/2018 22:06 | 4   | 21.2 | 3.3 | 2.3 | 0.1705 | 1.6 |
| 4/18/2018 22:07 | 3.8 | 21.1 | 3.3 | 2.3 | 0.1671 | 1.6 |
| 4/18/2018 22:08 | 3.7 | 20.5 | 3.2 | 2.3 | 0.1683 | 1.5 |
| 4/18/2018 22:09 | 4   | 20.8 | 3.2 | 2.4 | 0.1723 | 1.5 |
| 4/18/2018 22:10 | 4.3 | 20.6 | 3.2 | 2.4 | 0.1604 | 1.6 |
| 4/18/2018 22:11 | 3.9 | 20.6 | 3.2 | 2.4 | 0.171  | 1.5 |
| 4/18/2018 22:12 | 4.6 | 21   | 3.2 | 2.4 | 0.159  | 1.5 |
| 4/18/2018 22:13 | 3.9 | 20.8 | 3.1 | 2.5 | 0.1752 | 1.5 |
| 4/18/2018 22:14 | 2.8 | 20.3 | 3.1 | 2.5 | 0.1715 | 1.7 |
| 4/18/2018 22:15 | 3.3 | 20.6 | 3.1 | 2.5 | 0.1595 | 1.8 |
| 4/18/2018 22:16 | 4.6 | 20.6 | 3.2 | 2.5 | 0.1714 | 1.9 |
| 4/18/2018 22:17 | 5.4 | 21   | 3.2 | 2.5 | 0.1624 | 2.1 |
| 4/18/2018 22:18 | 4.4 | 20.9 | 3.2 | 2.5 | 0.1684 | 2.2 |
| 4/18/2018 22:19 | 3.8 | 21.2 | 3.2 | 2.5 | 0.1633 | 2.3 |
| 4/18/2018 22:20 | 3.4 | 21   | 3.2 | 2.5 | 0.1753 | 2.4 |
| 4/18/2018 22:21 | 4.8 | 21   | 3.2 | 2.4 | 0.1718 | 2.4 |
| 4/18/2018 22:22 | 3.2 | 20.7 | 3.1 | 2.4 | 0.1647 | 2.4 |
| 4/18/2018 22:23 | 4.1 | 21.2 | 3.1 | 2.4 | 0.1716 | 2.5 |
| 4/18/2018 22:24 | 5   | 20.6 | 3.1 | 2.4 | 0.1548 | 2.5 |
| 4/18/2018 22:25 | 3.8 | 20.6 | 3.1 | 2.4 | 0.1735 | 2.5 |
| 4/18/2018 22:26 | 2.2 | 20.5 | 3.1 | 2.5 | 0.1695 | 2.6 |
| 4/18/2018 22:27 | 3.4 | 20.2 | 3.1 | 2.5 | 0.1649 | 2.6 |

|                 |      |      |     |     |        |     |
|-----------------|------|------|-----|-----|--------|-----|
| 4/18/2018 22:28 | 4    | 20.3 | 3.1 | 2.5 | 0.174  | 2.5 |
| 4/18/2018 22:29 | 4.9  | 20.5 | 3.1 | 2.5 | 0.1596 | 2.5 |
| 4/18/2018 22:30 | 4.1  | 20.5 | 3.1 | 2.5 | 0.1762 | 2.5 |
| 4/18/2018 22:31 | 5.3  | 21   | 3.1 | 2.5 | 0.1607 | 2.6 |
| 4/18/2018 22:32 | 4.8  | 20.7 | 3.1 | 2.5 | 0.1666 | 2.5 |
| 4/18/2018 22:33 | 5    | 20.9 | 3.1 | 2.5 | 0.1714 | 2.6 |
| 4/18/2018 22:34 | 2.6  | 20.5 | 3.1 | 2.5 | 0.1592 | 2.6 |
| 4/18/2018 22:35 | 4    | 20.4 | 3.1 | 2.5 | 0.1745 | 2.7 |
| 4/18/2018 22:36 | 4    | 20.8 | 3.1 | 2.5 | 0.1565 | 2.7 |
| 4/18/2018 22:37 | 3.6  | 20.3 | 3.1 | 2.5 | 0.1685 | 2.7 |
| 4/18/2018 22:38 | 5.5  | 20.5 | 3.1 | 2.5 | 0.1681 | 2.7 |
| 4/18/2018 22:39 | 2.8  | 20.4 | 3.2 | 2.5 | 0.1658 | 2.6 |
| 4/18/2018 22:40 | 3.1  | 20   | 3.1 | 2.5 | 0.1689 | 2.6 |
| 4/18/2018 22:41 | 3.3  | 20.3 | 3.2 | 2.5 | 0.1554 | 2.6 |
| 4/18/2018 22:42 | 4.9  | 20   | 3.1 | 2.6 | 0.1757 | 2.6 |
| 4/18/2018 22:43 | 3.4  | 20   | 3.2 | 2.6 | 0.1631 | 2.7 |
| 4/18/2018 22:44 | 3.6  | 20.1 | 3.2 | 2.6 | 0.174  | 2.7 |
| 4/18/2018 22:45 | 4    | 20.2 | 3.3 | 2.6 | 0.169  | 2.7 |
| 4/18/2018 22:46 | 2.9  | 20.2 | 3.3 | 2.6 | 0.163  | 2.7 |
| 4/18/2018 22:47 | 4.3  | 20   | 3.4 | 2.6 | 0.1743 | 2.7 |
| 4/18/2018 22:48 | 4.1  | 20.4 | 3.5 | 2.6 | 0.1649 | 2.7 |
| 4/18/2018 22:49 |      | 20.1 | 3.4 | 2.6 | 0.1757 | 2.7 |
| 4/18/2018 22:50 |      | 20.3 | 3.4 | 2.6 | 0.1676 | 2.7 |
| 4/18/2018 22:51 | 3.9  | 20.2 | 3.6 | 2.6 | 0.1723 | 2.7 |
| 4/18/2018 22:52 | 3.3  | 20.4 | 3.6 | 2.5 | 0.1787 | 2.7 |
| 4/18/2018 22:53 |      | 20.5 | 3.7 | 2.5 | 0.1572 | 2.7 |
| 4/18/2018 22:54 | 8.2  | 20.2 | 3.6 | 2.5 | 0.1707 | 2.6 |
| 4/18/2018 22:55 |      | 20.1 | 3.6 | 2.5 | 0.1599 | 2.6 |
| 4/18/2018 22:56 | 4.4  | 20   | 3.5 | 2.5 | 0.1701 | 2.6 |
| 4/18/2018 22:57 | 10   | 20   | 3.4 | 2.5 | 0.1696 | 2.7 |
| 4/18/2018 22:58 |      | 19.7 | 3.3 | 2.5 | 0.1586 | 2.7 |
| 4/18/2018 22:59 | 4.3  | 19.8 | 3.3 | 2.5 | 0.175  | 2.7 |
| 4/18/2018 23:00 | 6.4  | 19.7 | 3.3 | 2.6 | 0.1633 | 2.7 |
| 4/18/2018 23:01 | 4.8  | 19.9 | 3.4 | 2.6 | 0.1757 | 2.7 |
| 4/18/2018 23:02 | 10.8 | 20.1 | 3.5 | 2.6 | 0.1675 | 2.7 |
| 4/18/2018 23:03 | 3.6  | 20   | 3.4 | 2.6 | 0.1671 | 2.7 |
| 4/18/2018 23:04 | 3.9  | 20   | 3.4 | 2.6 | 0.1643 | 2.8 |
| 4/18/2018 23:05 | 4.3  | 20   | 3.4 | 2.6 | 0.165  | 2.8 |
| 4/18/2018 23:06 | 4.4  | 20.1 | 3.4 | 2.6 | 0.1658 | 2.7 |
| 4/18/2018 23:07 | 3.5  | 19.8 | 3.4 | 2.6 | 0.1607 | 2.7 |
| 4/18/2018 23:08 | 4    | 19.9 | 3.5 | 2.6 | 0.1737 | 2.8 |
| 4/18/2018 23:09 | 3.1  | 20   | 3.5 | 2.6 | 0.1593 | 2.8 |
| 4/18/2018 23:10 | 5    | 20.1 | 3.5 | 2.6 | 0.1652 | 2.8 |
| 4/18/2018 23:11 | 3.6  | 19.7 | 3.5 | 2.6 | 0.1695 | 2.7 |
| 4/18/2018 23:12 | 4.1  | 19.7 | 3.5 | 2.6 | 0.163  | 2.5 |
| 4/18/2018 23:13 | 3    | 20   | 3.4 | 2.6 | 0.1687 | 2.5 |
| 4/18/2018 23:14 | 2.9  | 19.8 | 3.5 | 2.6 | 0.1579 | 2.5 |

|                 |     |      |     |     |        |     |
|-----------------|-----|------|-----|-----|--------|-----|
| 4/18/2018 23:15 | 3.5 | 20.2 | 3.4 | 2.6 | 0.1687 | 2.7 |
| 4/18/2018 23:16 | 4.7 | 19.9 | 3.4 | 2.6 | 0.168  | 2.6 |
| 4/18/2018 23:17 | 3.9 | 20   | 3.4 | 2.6 | 0.1567 | 2.6 |
| 4/18/2018 23:18 | 3.9 | 20.1 | 3.5 | 2.6 | 0.1729 | 2.7 |
| 4/18/2018 23:19 | 2.2 | 20.1 | 3.7 | 2.6 | 0.1614 | 2.6 |
| 4/18/2018 23:20 | 4.8 | 20   | 3.6 | 2.6 | 0.1703 | 2.5 |
| 4/18/2018 23:21 | 3.3 | 20.2 | 3.6 | 2.5 | 0.1629 | 2.7 |
| 4/18/2018 23:22 | 3.3 | 20   | 3.6 | 2.5 | 0.1699 | 2.7 |
| 4/18/2018 23:23 | 4.1 | 19.8 | 3.6 | 2.5 | 0.1702 | 2.9 |
| 4/18/2018 23:24 | 3.3 | 20.3 | 3.5 | 2.5 | 0.1645 | 2.9 |
| 4/18/2018 23:25 | 4.8 | 20.3 | 3.6 | 2.5 | 0.1708 | 2.8 |
| 4/18/2018 23:26 | 4.2 | 20.2 | 3.5 | 2.5 | 0.1569 | 2.7 |
| 4/18/2018 23:27 | 4   | 20.1 | 3.5 | 2.5 | 0.1667 | 2.6 |
| 4/18/2018 23:28 | 4.6 | 20.1 | 3.5 | 2.5 | 0.1562 | 2.3 |
| 4/18/2018 23:29 | 4.9 | 20   | 3.5 | 2.5 | 0.1734 | 2.3 |
| 4/18/2018 23:30 | 2   | 20.3 | 3.5 | 2.5 | 0.1701 | 2.4 |
| 4/18/2018 23:31 | 4.8 | 20.7 | 3.5 | 2.5 | 0.1531 | 2.4 |
| 4/18/2018 23:32 | 3.2 | 19.8 | 3.5 | 2.5 | 0.1808 | 2.4 |
| 4/18/2018 23:33 | 4.8 | 20.5 | 3.5 | 2.5 | 0.1506 | 2.5 |
| 4/18/2018 23:34 | 3.7 | 20   | 3.4 | 2.5 | 0.1622 | 2.6 |
| 4/18/2018 23:35 | 2.8 | 20.1 | 3.5 | 2.5 | 0.1564 | 2.7 |
| 4/18/2018 23:36 | 5.9 | 20.2 | 3.4 | 2.5 | 0.1684 | 2.6 |
| 4/18/2018 23:37 | 4.7 | 20.4 | 3.4 | 2.5 | 0.1624 | 2.6 |
| 4/18/2018 23:38 | 4.1 | 20   | 3.4 | 2.5 | 0.1575 | 2.5 |
| 4/18/2018 23:39 | 3.3 | 20.3 | 3.4 | 2.5 | 0.1712 | 2.6 |
| 4/18/2018 23:40 | 3.6 | 20.2 | 3.4 | 2.5 | 0.1578 | 2.8 |
| 4/18/2018 23:41 | 3.7 | 20.1 | 3.3 | 2.5 | 0.1689 | 2.9 |
| 4/18/2018 23:42 | 2.2 | 20.5 | 3.4 | 2.5 | 0.1659 | 2.9 |
| 4/18/2018 23:43 | 3.2 | 20   | 3.4 | 2.5 | 0.1609 | 2.9 |
| 4/18/2018 23:44 | 4.4 | 19.9 | 3.3 | 2.5 | 0.1733 | 2.8 |
| 4/18/2018 23:45 | 4.5 | 19.9 | 3.3 | 2.5 | 0.1606 | 2.8 |
| 4/18/2018 23:46 | 3.9 | 20.1 | 3.3 | 2.5 | 0.1768 | 2.8 |
| 4/18/2018 23:47 | 2.7 | 20.1 | 3.3 | 2.5 | 0.1614 | 2.8 |
| 4/18/2018 23:48 | 4.3 | 20.2 | 3.3 | 2.5 | 0.1595 | 2.8 |
| 4/18/2018 23:49 | 3.8 | 20.3 | 3.3 | 2.5 | 0.1686 | 2.9 |
| 4/18/2018 23:50 | 2.7 | 20   | 3.3 | 2.5 | 0.155  | 2.9 |
| 4/18/2018 23:51 | 2   | 20   | 3.3 | 2.5 | 0.1686 | 2.9 |
| 4/18/2018 23:52 | 2   | 20.5 | 3.3 | 2.5 | 0.1623 | 2.8 |
| 4/18/2018 23:53 | 4.6 | 20.4 | 3.3 | 2.5 | 0.1673 | 2.8 |
| 4/18/2018 23:54 | 3   | 20   | 3.3 | 2.5 | 0.1688 | 2.9 |
| 4/18/2018 23:55 | 5   | 20.1 | 3.3 | 2.5 | 0.1601 | 2.9 |
| 4/18/2018 23:56 | 4.1 | 20.2 | 3.3 | 2.5 | 0.1764 | 2.8 |
| 4/18/2018 23:57 | 4.8 | 20.1 | 3.3 | 2.5 | 0.1551 | 2.8 |
| 4/18/2018 23:58 | 3.5 | 20.1 | 3.3 | 2.5 | 0.1692 | 2.8 |
| 4/18/2018 23:59 | 4.3 | 20.2 | 3.3 | 2.5 | 0.1723 | 2.8 |
| 4/19/2018 0:00  | 3.4 | 20.3 | 3.3 | 2.5 | 0.1613 | 2.8 |
| 4/19/2018 0:01  | 3.5 | 20.2 | 3.3 | 2.5 | 0.1663 | 2.8 |

|                |     |      |     |     |        |     |
|----------------|-----|------|-----|-----|--------|-----|
| 4/19/2018 0:02 | 3.9 | 20   | 3.3 | 2.5 | 0.1529 | 2.8 |
| 4/19/2018 0:03 | 4   | 19.8 | 3.2 | 2.5 | 0.17   | 2.8 |
| 4/19/2018 0:04 | 4.3 | 19.8 | 3.2 | 2.5 | 0.1584 | 2.9 |
| 4/19/2018 0:05 | 3.6 | 20.1 | 3.2 | 2.5 | 0.1664 | 2.9 |
| 4/19/2018 0:06 | 3.6 | 19.9 | 3.2 | 2.5 | 0.1657 | 3   |
| 4/19/2018 0:07 | 3.8 | 20   | 3.2 | 2.5 | 0.1613 | 3   |
| 4/19/2018 0:08 | 3.6 | 19.8 | 3.2 | 2.5 | 0.1685 | 3   |
| 4/19/2018 0:09 | 3.6 | 19.6 | 3.2 | 2.6 | 0.157  | 2.9 |
| 4/19/2018 0:10 | 3.1 | 19.7 | 3.2 | 2.6 | 0.1722 | 2.9 |
| 4/19/2018 0:11 | 3.1 | 19.9 | 3.2 | 2.6 | 0.1575 | 2.9 |
| 4/19/2018 0:12 | 3.1 | 20   | 3.2 | 2.6 | 0.1611 | 2.8 |
| 4/19/2018 0:13 | 2.6 | 20   | 3.2 | 2.6 | 0.168  | 2.8 |
| 4/19/2018 0:14 | 5.7 | 19.8 | 3.2 | 2.6 | 0.1558 | 2.8 |
| 4/19/2018 0:15 | 3.4 | 19.7 | 3.2 | 2.6 | 0.162  | 2.8 |
| 4/19/2018 0:16 | 5   | 19.8 | 3.2 | 2.6 | 0.1477 | 2.9 |
| 4/19/2018 0:17 | 4   | 19.6 | 3.2 | 2.6 | 0.169  | 2.9 |
| 4/19/2018 0:18 | 3   | 19.5 | 3.2 | 2.6 | 0.1586 | 2.9 |
| 4/19/2018 0:19 | 4.2 | 19.6 | 3.3 | 2.6 | 0.1632 | 2.9 |
| 4/19/2018 0:20 | 3.5 | 19.8 | 3.3 | 2.6 | 0.1657 | 2.9 |
| 4/19/2018 0:21 | 3.4 | 19.5 | 3.3 | 2.6 | 0.1595 | 2.9 |
| 4/19/2018 0:22 | 3.6 | 19.7 | 3.4 | 2.6 | 0.1699 | 2.9 |
| 4/19/2018 0:23 | 3.9 | 19.5 | 3.3 | 2.6 | 0.156  | 2.8 |
| 4/19/2018 0:24 | 2.6 | 19.6 | 3.4 | 2.6 | 0.1736 | 2.9 |
| 4/19/2018 0:25 | 2.9 | 19.5 | 3.3 | 2.6 | 0.1631 | 2.8 |
| 4/19/2018 0:26 | 3.5 | 19.6 | 3.4 | 2.6 | 0.1704 | 2.7 |
| 4/19/2018 0:27 | 3.3 | 19.5 | 3.3 | 2.6 | 0.1733 | 2.8 |
| 4/19/2018 0:28 | 3.6 | 19.5 | 3.3 | 2.6 | 0.1602 | 2.8 |
| 4/19/2018 0:29 | 4.6 | 19.3 | 3.3 | 2.6 | 0.1801 | 2.8 |
| 4/19/2018 0:30 | 4.1 | 19.9 | 3.3 | 2.6 | 0.1523 | 2.7 |
| 4/19/2018 0:31 | 2.8 | 19.1 | 3.4 | 2.6 | 0.17   | 2.8 |
| 4/19/2018 0:32 | 5.1 | 19.6 | 3.4 | 2.6 | 0.1561 | 2.8 |
| 4/19/2018 0:33 | 3.1 | 19.6 | 3.4 | 2.6 | 0.1661 | 2.9 |
| 4/19/2018 0:34 | 3.6 | 19.2 | 3.4 | 2.6 | 0.1618 | 2.9 |
| 4/19/2018 0:35 | 4   | 19.5 | 3.4 | 2.6 | 0.1564 | 3   |
| 4/19/2018 0:36 | 3.5 | 19.2 | 3.4 | 2.6 | 0.1712 | 3   |
| 4/19/2018 0:37 | 2.7 | 19.3 | 3.4 | 2.6 | 0.1608 | 2.9 |
| 4/19/2018 0:38 | 2.8 | 19.4 | 3.4 | 2.6 | 0.1659 | 2.8 |
| 4/19/2018 0:39 | 3.6 | 19.5 | 3.4 | 2.7 | 0.1602 | 2.7 |
| 4/19/2018 0:40 | 2.4 | 19.4 | 3.4 | 2.7 | 0.1627 | 2.7 |
| 4/19/2018 0:41 | 2.8 | 19.1 | 3.5 | 2.7 | 0.1665 | 2.7 |
| 4/19/2018 0:42 | 3.6 | 19.3 | 3.5 | 2.7 | 0.1547 | 2.7 |
| 4/19/2018 0:43 | 2.7 | 19.4 | 3.5 | 2.7 | 0.1677 | 2.6 |
| 4/19/2018 0:44 | 2.3 | 19.2 | 3.5 | 2.7 | 0.1596 | 2.7 |
| 4/19/2018 0:45 | 2.6 | 19.4 | 3.5 | 2.7 | 0.1677 | 2.8 |
| 4/19/2018 0:46 | 4   | 19.1 | 3.5 | 2.7 | 0.1636 | 2.9 |
| 4/19/2018 0:47 | 4.3 | 19.2 | 3.5 | 2.7 | 0.1584 | 3   |
| 4/19/2018 0:48 | 4.6 | 18.9 | 3.5 | 2.7 | 0.1679 | 3   |

|                |     |      |     |     |        |     |
|----------------|-----|------|-----|-----|--------|-----|
| 4/19/2018 0:49 | 4   | 19.5 | 3.7 | 2.7 | 0.1555 | 3   |
| 4/19/2018 0:50 | 3.9 | 19   | 3.7 | 2.7 | 0.1741 | 3   |
| 4/19/2018 0:51 | 2.7 | 19.7 | 3.9 | 2.7 | 0.1583 | 3   |
| 4/19/2018 0:52 | 5.6 | 19.8 | 4   | 2.6 | 0.1698 | 2.9 |
| 4/19/2018 0:53 | 4.8 | 20   | 4.1 | 2.6 | 0.173  | 3   |
| 4/19/2018 0:54 | 3.2 | 20   | 4.1 | 2.5 | 0.1616 | 2.9 |
| 4/19/2018 0:55 | 2.2 | 19.8 | 4.2 | 2.5 | 0.1734 | 2.8 |
| 4/19/2018 0:56 | 4.7 | 19.6 | 3.9 | 2.4 | 0.161  | 2.7 |
| 4/19/2018 0:57 | 4.1 | 19.8 | 3.9 | 2.4 | 0.157  | 2.7 |
| 4/19/2018 0:58 | 3.3 | 20.8 | 4.4 | 2.4 | 0.1629 | 2.6 |
| 4/19/2018 0:59 | 5.4 | 20.8 | 4.6 | 2.3 | 0.1597 | 2.6 |
| 4/19/2018 1:00 | 4.1 | 21.1 | 4.8 | 2.3 | 0.1728 | 2.6 |
| 4/19/2018 1:01 | 5.1 | 20.1 | 4.6 | 2.3 | 0.1586 | 2.6 |
| 4/19/2018 1:02 | 4.6 | 19.3 | 3.8 | 2.3 | 0.1702 | 2.6 |
| 4/19/2018 1:03 | 3.5 | 19.6 | 4   | 2.3 | 0.1607 | 2.7 |
| 4/19/2018 1:04 | 3   | 19.3 | 4   | 2.3 | 0.1621 | 2.7 |
| 4/19/2018 1:05 | 3.9 | 19   | 3.8 | 2.4 | 0.1692 | 2.7 |
| 4/19/2018 1:06 | 2.8 | 19   | 3.7 | 2.4 | 0.1598 | 2.7 |
| 4/19/2018 1:07 | 1.7 | 19   | 3.7 | 2.4 | 0.1736 | 2.7 |
| 4/19/2018 1:08 | 4.4 | 18.9 | 3.7 | 2.5 | 0.159  | 2.8 |
| 4/19/2018 1:09 | 3.1 | 19   | 3.8 | 2.6 | 0.1679 | 2.7 |
| 4/19/2018 1:10 | 4.5 | 19.2 | 3.8 | 2.6 | 0.1608 | 2.7 |
| 4/19/2018 1:11 | 4   | 19.3 | 3.8 | 2.6 | 0.1652 | 2.7 |
| 4/19/2018 1:12 | 3.8 | 19.3 | 3.9 | 2.7 | 0.1699 | 2.8 |
| 4/19/2018 1:13 | 1.8 | 19   | 3.9 | 2.7 | 0.1596 | 2.8 |
| 4/19/2018 1:14 | 4   | 19   | 3.9 | 2.7 | 0.1683 | 2.8 |
| 4/19/2018 1:15 | 2.8 | 18.9 | 3.9 | 2.6 | 0.1631 | 2.9 |
| 4/19/2018 1:16 | 3.6 | 19.3 | 4   | 2.6 | 0.167  | 2.9 |
| 4/19/2018 1:17 | 5   | 19.5 | 4.2 | 2.6 | 0.1549 | 2.9 |
| 4/19/2018 1:18 | 3   | 19.5 | 4.2 | 2.6 | 0.165  | 2.9 |
| 4/19/2018 1:19 | 3.9 | 18.9 | 4.2 | 2.6 | 0.172  | 2.9 |
| 4/19/2018 1:20 | 4.2 | 18.9 | 4.2 | 2.6 | 0.1562 | 2.9 |
| 4/19/2018 1:21 | 4.2 | 20.2 | 4.6 | 2.6 | 0.1714 | 2.8 |
| 4/19/2018 1:22 | 3.8 | 20.2 | 5   | 2.5 | 0.16   | 2.9 |
| 4/19/2018 1:23 | 5   | 21   | 5.3 | 2.5 | 0.1705 | 2.9 |
| 4/19/2018 1:24 | 3.3 | 19.6 | 5   | 2.4 | 0.1689 | 2.8 |
| 4/19/2018 1:25 | 3.6 | 19.2 | 4.3 | 2.4 | 0.1599 | 2.9 |
| 4/19/2018 1:26 | 3.1 | 19   | 4.3 | 2.4 | 0.1702 | 2.8 |
| 4/19/2018 1:27 | 3.5 | 18.9 | 4.3 | 2.4 | 0.1562 | 2.9 |
| 4/19/2018 1:28 | 3.9 | 18.8 | 4.1 | 2.4 | 0.1753 | 2.9 |
| 4/19/2018 1:29 | 3.1 | 18.9 | 4.1 | 2.4 | 0.1608 | 2.9 |
| 4/19/2018 1:30 | 2.5 | 18.9 | 4.1 | 2.4 | 0.1677 | 3   |
| 4/19/2018 1:31 | 4.5 | 18.9 | 4.1 | 2.5 | 0.1679 | 2.9 |
| 4/19/2018 1:32 | 4.3 | 18.7 | 4   | 2.6 | 0.1559 | 2.9 |
| 4/19/2018 1:33 | 3.9 | 19   | 4.1 | 2.6 | 0.1708 | 3   |
| 4/19/2018 1:34 | 3.6 | 18.6 | 4.1 | 2.6 | 0.1594 | 2.9 |
| 4/19/2018 1:35 | 2.8 | 19.1 | 4.1 | 2.7 | 0.1693 | 2.9 |

|                |     |      |     |     |        |     |
|----------------|-----|------|-----|-----|--------|-----|
| 4/19/2018 1:36 | 3.5 | 18.9 | 4.1 | 2.7 | 0.1673 | 2.9 |
| 4/19/2018 1:37 | 5.2 | 18.6 | 4.1 | 2.7 | 0.1592 | 2.8 |
| 4/19/2018 1:38 | 2   | 18.7 | 4.2 | 2.7 | 0.1653 | 2.9 |
| 4/19/2018 1:39 | 2   | 18.7 | 4.3 | 2.7 | 0.1595 | 2.9 |
| 4/19/2018 1:40 | 2.6 | 18.9 | 4.4 | 2.7 | 0.1687 | 2.9 |
| 4/19/2018 1:41 |     | 18.8 | 4.4 | 2.7 | 0.1609 | 2.9 |
| 4/19/2018 1:42 |     | 18.8 | 4.6 | 2.7 | 0.1716 | 2.9 |
| 4/19/2018 1:43 | 5.1 | 18.6 | 4.4 | 2.7 | 0.1614 | 3   |
| 4/19/2018 1:44 |     | 18.7 | 4.4 | 2.7 | 0.1673 | 3   |
| 4/19/2018 1:45 | 4.6 | 18.7 | 4.6 | 2.7 | 0.1662 | 2.9 |
| 4/19/2018 1:46 |     | 18.6 | 4.7 | 2.7 | 0.1583 | 2.8 |
| 4/19/2018 1:47 | 4.3 | 19   | 4.9 | 2.7 | 0.169  | 2.8 |
| 4/19/2018 1:48 | 3.7 | 18.5 | 5.1 | 2.7 | 0.1604 | 2.8 |
| 4/19/2018 1:49 |     | 18.7 | 5.3 | 2.7 | 0.1689 | 2.8 |
| 4/19/2018 1:50 | 5.2 | 18.9 | 5.1 | 2.7 | 0.1667 | 2.8 |
| 4/19/2018 1:51 |     | 18.9 | 5.6 | 2.6 | 0.1668 | 2.8 |
| 4/19/2018 1:52 | 3.9 | 19.6 | 5.7 | 2.6 | 0.1783 | 2.7 |
| 4/19/2018 1:53 | 3.3 | 19.2 | 6.4 | 2.6 | 0.1545 | 2.7 |
| 4/19/2018 1:54 | 4.3 | 19.3 | 6.3 | 2.5 | 0.1756 | 2.8 |
| 4/19/2018 1:55 | 3.6 | 18.7 | 4.8 | 2.5 | 0.1593 | 2.9 |
| 4/19/2018 1:56 | 4.3 | 18.7 | 5   | 2.5 | 0.1665 | 2.9 |
| 4/19/2018 1:57 | 2.2 | 18.3 | 5.2 | 2.5 | 0.1684 | 3   |
| 4/19/2018 1:58 | 4.3 | 18.4 | 4.9 | 2.6 | 0.1614 | 3.1 |
| 4/19/2018 1:59 | 3.3 | 18.8 | 4.8 | 2.6 | 0.1694 | 3.2 |
| 4/19/2018 2:00 | 3.5 | 18.6 | 4.8 | 2.6 | 0.1574 | 3.2 |
| 4/19/2018 2:01 | 3.5 | 18.4 | 4.7 | 2.7 | 0.1724 | 3.1 |
| 4/19/2018 2:02 | 2.2 | 18.5 | 4.7 | 2.7 | 0.162  | 3   |
| 4/19/2018 2:03 | 2.9 | 18.5 | 4.7 | 2.8 | 0.161  | 2.9 |
| 4/19/2018 2:04 | 2.5 | 18.5 | 4.8 | 2.8 | 0.171  | 2.9 |
| 4/19/2018 2:05 | 3.9 | 18.3 | 4.8 | 2.8 | 0.1549 | 3   |
| 4/19/2018 2:06 | 2.9 | 18.5 | 4.9 | 2.8 | 0.1697 | 2.8 |
| 4/19/2018 2:07 | 2.8 | 18.4 | 4.8 | 2.8 | 0.167  | 2.9 |
| 4/19/2018 2:08 | 2.9 | 18.4 | 4.9 | 2.8 | 0.1636 | 3   |
| 4/19/2018 2:09 | 2.8 | 18.5 | 5   | 2.8 | 0.1756 | 3   |
| 4/19/2018 2:10 | 4.2 | 18.3 | 5.3 | 2.8 | 0.1618 | 3   |
| 4/19/2018 2:11 | 3.2 | 18.3 | 5.2 | 2.8 | 0.1782 | 2.8 |
| 4/19/2018 2:12 | 3.4 | 18.4 | 5.2 | 2.8 | 0.162  | 2.3 |
| 4/19/2018 2:13 | 5.3 | 18.2 | 5.1 | 2.8 | 0.1642 | 1.7 |
| 4/19/2018 2:14 | 2.5 | 18.2 | 5.4 | 2.8 | 0.1627 | 1.9 |
| 4/19/2018 2:15 | 2.5 | 18.1 | 5.6 | 2.9 | 0.1739 | 2.1 |
| 4/19/2018 2:16 | 2.3 | 18.1 | 5.6 | 2.8 | 0.1821 | 2.3 |
| 4/19/2018 2:17 | 3.4 | 18.3 | 5.9 | 2.8 | 0.1659 | 2.3 |
| 4/19/2018 2:18 | 3.7 | 18.2 | 6.4 | 2.8 | 0.1769 | 2.2 |
| 4/19/2018 2:19 | 2.6 | 18.2 | 6.5 | 2.8 | 0.1693 | 2.2 |
| 4/19/2018 2:20 | 2.2 | 18.2 | 6.5 | 2.8 | 0.175  | 2   |
| 4/19/2018 2:21 | 3.5 | 18.2 | 7.3 | 2.8 | 0.1644 | 2   |
| 4/19/2018 2:22 | 2.3 | 18.1 | 7.5 | 2.8 | 0.1638 | 2.2 |

|                |     |      |     |     |        |     |
|----------------|-----|------|-----|-----|--------|-----|
| 4/19/2018 2:23 | 3.2 | 18.2 | 6.3 | 2.8 | 0.1744 | 2.3 |
| 4/19/2018 2:24 | 4   | 18   | 6.5 | 2.8 | 0.1585 | 2.3 |
| 4/19/2018 2:25 | 3.2 | 18   | 6.9 | 2.8 | 0.1711 | 2.4 |
| 4/19/2018 2:26 | 2.7 | 17.8 | 6.7 | 2.8 | 0.1712 | 2.5 |
| 4/19/2018 2:27 | 3.4 | 18.1 | 6.1 | 2.8 | 0.1571 | 2.5 |
| 4/19/2018 2:28 | 3   | 17.9 | 5.9 | 2.8 | 0.1729 | 2.6 |
| 4/19/2018 2:29 | 2.8 | 18.1 | 6   | 2.8 | 0.1594 | 2.6 |
| 4/19/2018 2:30 | 3.8 | 17.9 | 5.9 | 2.9 | 0.1758 | 2.6 |
| 4/19/2018 2:31 | 2.4 | 18.2 | 5.9 | 2.9 | 0.1617 | 2.5 |
| 4/19/2018 2:32 | 2.4 | 18   | 5.8 | 2.9 | 0.1753 | 2.5 |
| 4/19/2018 2:33 | 3.3 | 17.8 | 5.9 | 2.9 | 0.1768 | 2.4 |
| 4/19/2018 2:34 | 1.5 | 18.1 | 5.9 | 2.9 | 0.1601 | 2.4 |
| 4/19/2018 2:35 | 2.8 | 18   | 5.9 | 2.9 | 0.1786 | 2.4 |
| 4/19/2018 2:36 | 3.5 | 18   | 5.9 | 2.9 | 0.1657 | 2.4 |
| 4/19/2018 2:37 | 3.7 | 17.8 | 5.9 | 2.9 | 0.1781 | 2.4 |
| 4/19/2018 2:38 | 2.4 | 18   | 6   | 2.9 | 0.1715 | 2.5 |
| 4/19/2018 2:39 | 2.5 | 18.1 | 6.1 | 2.9 | 0.1687 | 2.4 |
| 4/19/2018 2:40 | 3.9 | 18.1 | 6   | 2.9 | 0.177  | 2.4 |
| 4/19/2018 2:41 | 3   | 17.8 | 5.9 | 3   | 0.161  | 2.5 |
| 4/19/2018 2:42 | 3.1 | 17.9 | 6   | 2.9 | 0.1817 | 2.5 |
| 4/19/2018 2:43 | 2.3 | 18.1 | 5.9 | 3   | 0.1615 | 2.4 |
| 4/19/2018 2:44 | 3   | 18.1 | 6   | 3   | 0.1781 | 2.4 |
| 4/19/2018 2:45 | 2.8 | 18   | 6   | 3   | 0.1667 | 2.5 |
| 4/19/2018 2:46 | 2.6 | 18.1 | 6   | 3   | 0.1713 | 2.6 |
| 4/19/2018 2:47 | 4   | 18.1 | 6   | 3   | 0.1767 | 2.5 |
| 4/19/2018 2:48 | 3.5 | 18.1 | 6   | 3   | 0.165  | 2.4 |
| 4/19/2018 2:49 | 2.8 | 17.9 | 5.9 | 3   | 0.1769 | 2.1 |
| 4/19/2018 2:50 | 3.6 | 17.9 | 5.9 | 3   | 0.1628 | 1.3 |
| 4/19/2018 2:51 | 3.5 | 18   | 5.9 | 3   | 0.1836 | 1.3 |
| 4/19/2018 2:52 | 3.7 | 18.3 | 6   | 3   | 0.1792 | 1.3 |
| 4/19/2018 2:53 | 3.3 | 18.3 | 6   | 3   | 0.1692 | 1.3 |
| 4/19/2018 2:54 | 2.5 | 18.1 | 5.9 | 3   | 0.1793 | 1.3 |
| 4/19/2018 2:55 | 3.5 | 18.2 | 6   | 3   | 0.1702 | 1.3 |
| 4/19/2018 2:56 | 3   | 18.2 | 5.9 | 3   | 0.1805 | 1.4 |
| 4/19/2018 2:57 | 4.3 | 18   | 5.9 | 3   | 0.1635 | 1.4 |
| 4/19/2018 2:58 | 3.5 | 18.4 | 6   | 3   | 0.1753 | 1.5 |
| 4/19/2018 2:59 | 2.9 | 18.2 | 5.9 | 3   | 0.1706 | 1.6 |
| 4/19/2018 3:00 | 2.8 | 18.1 | 5.9 | 3   | 0.1656 | 1.6 |
| 4/19/2018 3:01 | 2.7 | 18.1 | 5.9 | 3   | 0.1736 | 1.7 |
| 4/19/2018 3:02 | 2.3 | 18.6 | 5.8 | 3   | 0.1615 | 1.8 |
| 4/19/2018 3:03 | 2.4 | 18.6 | 5.9 | 2.9 | 0.1765 | 1.9 |
| 4/19/2018 3:04 | 5.1 | 18.7 | 5.9 | 2.9 | 0.1636 | 1.9 |
| 4/19/2018 3:05 | 2.2 | 18.9 | 5.9 | 2.8 | 0.1725 | 1.9 |
| 4/19/2018 3:06 | 3.4 | 18.8 | 5.9 | 2.8 | 0.1732 | 1.9 |
| 4/19/2018 3:07 | 3.8 | 18.7 | 5.7 | 2.8 | 0.1631 | 1.9 |
| 4/19/2018 3:08 | 3.3 | 18.5 | 5.8 | 2.8 | 0.1738 | 1.9 |
| 4/19/2018 3:09 | 4.3 | 19.2 | 5.8 | 2.7 | 0.1658 | 2   |



|                |     |      |     |     |        |     |
|----------------|-----|------|-----|-----|--------|-----|
| 4/19/2018 3:10 | 3   | 18.6 | 5.8 | 2.7 | 0.1755 | 2   |
| 4/19/2018 3:11 | 2.8 | 18.4 | 5.6 | 2.7 | 0.1725 | 2.1 |
| 4/19/2018 3:12 | 4.3 | 18.5 | 5.6 | 2.7 | 0.1682 | 2.1 |
| 4/19/2018 3:13 | 3.1 | 18.5 | 5.7 | 2.7 | 0.175  | 2.2 |
| 4/19/2018 3:14 | 2.8 | 18.4 | 5.6 | 2.7 | 0.1604 | 2.2 |
| 4/19/2018 3:15 | 3.2 | 18.1 | 5.5 | 2.8 | 0.1774 | 2.2 |
| 4/19/2018 3:16 | 3   | 18.3 | 5.5 | 2.8 | 0.1741 | 2.2 |
| 4/19/2018 3:17 | 2.8 | 18.2 | 5.5 | 2.8 | 0.1699 | 2.3 |
| 4/19/2018 3:18 | 2   | 18.3 | 5.5 | 2.9 | 0.1793 | 2.3 |
| 4/19/2018 3:19 | 3.2 | 18.3 | 5.5 | 2.9 | 0.1555 | 2.4 |
| 4/19/2018 3:20 | 2.7 | 18   | 5.5 | 2.9 | 0.1738 | 2.4 |
| 4/19/2018 3:21 | 3.4 | 18.4 | 5.5 | 3   | 0.1607 | 2.5 |
| 4/19/2018 3:22 | 2.7 | 18.4 | 5.5 | 3   | 0.1716 | 2.5 |
| 4/19/2018 3:23 | 3.2 | 18.4 | 5.5 | 2.9 | 0.1711 | 2.5 |
| 4/19/2018 3:24 | 3.9 | 18.2 | 5.5 | 3   | 0.1726 | 2.2 |
| 4/19/2018 3:25 | 4.4 | 18.2 | 5.5 | 3   | 0.1706 | 2.3 |
| 4/19/2018 3:26 | 4.6 | 18.1 | 5.5 | 3   | 0.164  | 2.4 |
| 4/19/2018 3:27 | 3   | 18.2 | 5.5 | 3   | 0.1773 | 2.4 |
| 4/19/2018 3:28 | 3.1 | 18   | 5.6 | 3   | 0.1612 | 2.5 |
| 4/19/2018 3:29 | 2.4 | 18.2 | 5.5 | 3   | 0.1678 | 2.6 |
| 4/19/2018 3:30 | 3.9 | 18.1 | 5.6 | 3   | 0.1695 | 2.6 |
| 4/19/2018 3:31 | 2.4 | 18.3 | 5.9 | 3   | 0.171  | 2.5 |
| 4/19/2018 3:32 | 4.2 | 18   | 5.7 | 2.9 | 0.1657 | 2.5 |
| 4/19/2018 3:33 | 3.5 | 18.7 | 5.8 | 2.9 | 0.159  | 2.5 |
| 4/19/2018 3:34 | 4.5 | 18.3 | 6   | 2.9 | 0.172  | 2.6 |
| 4/19/2018 3:35 | 2.3 | 18.5 | 6.1 | 2.9 | 0.1598 | 2.6 |
| 4/19/2018 3:36 | 2.7 | 18.3 | 6.4 | 2.8 | 0.1654 | 2.5 |
| 4/19/2018 3:37 | 2.3 | 18.3 | 6.3 | 2.8 | 0.1682 | 2.5 |
| 4/19/2018 3:38 | 3.4 | 18.3 | 6.4 | 2.7 | 0.1671 | 2.5 |
| 4/19/2018 3:39 | 4.2 | 18.2 | 6.2 | 2.7 | 0.1704 | 2.5 |
| 4/19/2018 3:40 | 3.5 | 18.1 | 6.1 | 2.7 | 0.163  | 2.5 |
| 4/19/2018 3:41 | 3.2 | 18.2 | 6.2 | 2.7 | 0.1682 | 2.5 |
| 4/19/2018 3:42 | 2.6 | 18.1 | 6.2 | 2.6 | 0.1718 | 2.5 |
| 4/19/2018 3:43 | 3   | 18.2 | 6.2 | 2.6 | 0.1567 | 2.5 |
| 4/19/2018 3:44 | 2.3 | 18.1 | 6.1 | 2.7 | 0.1715 | 2.5 |
| 4/19/2018 3:45 | 1.4 | 18.1 | 5.7 | 2.7 | 0.1623 | 2.5 |
| 4/19/2018 3:46 | 2.7 | 17.8 | 5.6 | 2.8 | 0.1689 | 2.5 |
| 4/19/2018 3:47 | 2.6 | 18   | 5.6 | 2.8 | 0.168  | 2.5 |
| 4/19/2018 3:48 | 4.3 | 18   | 5.7 | 2.9 | 0.1662 | 2.5 |
| 4/19/2018 3:49 | 3.7 | 18.2 | 5.7 | 2.9 | 0.1757 | 2.6 |
| 4/19/2018 3:50 | 3.2 | 18   | 5.7 | 2.9 | 0.1582 | 2.6 |
| 4/19/2018 3:51 | 3.8 | 18   | 5.7 | 3   | 0.1733 | 2.5 |
| 4/19/2018 3:52 | 3.8 | 18.1 | 5.8 | 3   | 0.1605 | 2.5 |
| 4/19/2018 3:53 | 2.5 | 17.9 | 5.8 | 3   | 0.1628 | 2.5 |
| 4/19/2018 3:54 | 5.7 | 18.1 | 5.7 | 3   | 0.1654 | 2.5 |
| 4/19/2018 3:55 | 2.3 | 17.8 | 5.7 | 3   | 0.156  | 2.6 |
| 4/19/2018 3:56 | 4   | 18.1 | 5.7 | 2.9 | 0.1702 | 2.6 |

|                |     |      |     |     |        |     |
|----------------|-----|------|-----|-----|--------|-----|
| 4/19/2018 3:57 | 2.4 | 18.1 | 5.8 | 3   | 0.1601 | 2.7 |
| 4/19/2018 3:58 | 2   | 18   | 5.9 | 2.9 | 0.1647 | 2.7 |
| 4/19/2018 3:59 | 3.3 | 17.9 | 5.9 | 2.9 | 0.1671 | 2.8 |
| 4/19/2018 4:00 | 3.4 | 18.2 | 6.1 | 2.9 | 0.161  | 2.8 |
| 4/19/2018 4:01 | 3.4 | 18   | 6.2 | 2.9 | 0.1719 | 2.8 |
| 4/19/2018 4:02 | 2.8 | 17.8 | 6   | 2.9 | 0.1622 | 2.8 |
| 4/19/2018 4:03 | 4.9 | 18   | 6.2 | 2.9 | 0.1649 | 2.7 |
| 4/19/2018 4:04 | 3.6 | 18.2 | 6.5 | 2.9 | 0.1574 | 2.8 |
| 4/19/2018 4:05 | 3.7 | 18.3 | 6.5 | 2.8 | 0.1606 | 2.7 |
| 4/19/2018 4:06 | 3.4 | 18.1 | 6.5 | 2.8 | 0.1641 | 1.9 |
| 4/19/2018 4:07 | 3.3 | 18.4 | 6.9 | 2.8 | 0.1581 | 1.9 |
| 4/19/2018 4:08 | 4.1 | 18.4 | 7.6 | 2.7 | 0.1669 | 2.2 |
| 4/19/2018 4:09 | 3.8 | 18   | 6.9 | 2.7 | 0.1534 | 2.4 |
| 4/19/2018 4:10 | 3.4 | 17.8 | 6   | 2.7 | 0.1685 | 2.5 |
| 4/19/2018 4:11 | 4.2 | 17.8 | 6.4 | 2.7 | 0.157  | 2.5 |
| 4/19/2018 4:12 | 1.8 | 17.9 | 6.2 | 2.7 | 0.1657 | 2.4 |
| 4/19/2018 4:13 | 4.2 | 17.8 | 6   | 2.8 | 0.1664 | 1.6 |
| 4/19/2018 4:14 | 2.2 | 17.9 | 6   | 2.8 | 0.1572 | 1.6 |
| 4/19/2018 4:15 | 2.7 | 17.7 | 6   | 2.8 | 0.1684 | 1.9 |
| 4/19/2018 4:16 | 3.7 | 17.6 | 6.2 | 2.9 | 0.1617 | 2.2 |
| 4/19/2018 4:17 | 3.7 | 17.6 | 6   | 2.9 | 0.1649 | 2.2 |
| 4/19/2018 4:18 | 4.2 | 17.7 | 6.1 | 2.9 | 0.1694 | 2.1 |
| 4/19/2018 4:19 | 2.5 | 17.9 | 6.1 | 2.9 | 0.1602 | 1.4 |
| 4/19/2018 4:20 | 2.5 | 17.7 | 6.1 | 2.9 | 0.1771 | 1.5 |
| 4/19/2018 4:21 | 2.6 | 18   | 6   | 2.9 | 0.1586 | 1.8 |
| 4/19/2018 4:22 | 3.5 | 18.1 | 6   | 2.9 | 0.1666 | 1.9 |
| 4/19/2018 4:23 | 2.2 | 17.8 | 6.1 | 2.9 | 0.1659 | 2.2 |
| 4/19/2018 4:24 | 2.2 | 17.8 | 6.2 | 3   | 0.162  | 2.3 |
| 4/19/2018 4:25 | 5.2 | 18   | 6.2 | 3   | 0.1704 | 2.2 |
| 4/19/2018 4:26 | 2.1 | 17.7 | 6.3 | 3   | 0.1618 | 2.1 |
| 4/19/2018 4:27 | 3.4 | 17.8 | 6.5 | 3   | 0.1691 | 2.3 |
| 4/19/2018 4:28 | 3   | 17.8 | 6.5 | 3   | 0.1596 | 2.4 |
| 4/19/2018 4:29 | 3.5 | 17.6 | 6.4 | 3   | 0.1722 | 2.3 |
| 4/19/2018 4:30 | 3.4 | 18   | 6.4 | 3   | 0.1701 | 2.4 |
| 4/19/2018 4:31 | 0.6 | 18.1 | 6.5 | 2.9 | 0.1662 | 2.4 |
| 4/19/2018 4:32 | 3.6 | 18.1 | 6.6 | 2.9 | 0.1645 | 2.5 |
| 4/19/2018 4:33 | 3.5 | 18   | 6.6 | 2.9 | 0.1592 | 2.4 |
| 4/19/2018 4:34 | 2.4 | 18.4 | 6.6 | 2.8 | 0.1731 | 2.5 |
| 4/19/2018 4:35 | 3.3 | 18.2 | 6.5 | 2.8 | 0.1594 | 2.5 |
| 4/19/2018 4:36 | 4.3 | 17.9 | 6.5 | 2.8 | 0.1673 | 2.6 |
| 4/19/2018 4:37 | 4.4 | 17.9 | 6.4 | 2.8 | 0.1755 | 2.6 |
| 4/19/2018 4:38 | 2.1 | 18.3 | 6.3 | 2.7 | 0.1575 | 2.6 |
| 4/19/2018 4:39 | 3.2 | 18.2 | 6.3 | 2.7 | 0.1723 | 2.7 |
| 4/19/2018 4:40 | 1.3 | 18   | 6.2 | 2.7 | 0.1663 | 2.7 |
| 4/19/2018 4:41 | 2.3 | 17.8 | 6   | 2.7 | 0.1631 | 2.6 |
| 4/19/2018 4:42 | 3.4 | 17.8 | 5.9 | 2.8 | 0.1612 | 2.6 |
| 4/19/2018 4:43 | 1.7 | 17.7 | 5.9 | 2.9 | 0.1556 | 2.7 |

|                |     |      |     |     |        |     |
|----------------|-----|------|-----|-----|--------|-----|
| 4/19/2018 4:44 | 2.7 | 17.9 | 5.9 | 2.9 | 0.1759 | 2.7 |
| 4/19/2018 4:45 | 2.2 | 17.8 | 5.9 | 2.9 | 0.1527 | 2.7 |
| 4/19/2018 4:46 | 2.4 | 18   | 5.9 | 3   | 0.1747 | 2.7 |
| 4/19/2018 4:47 | 3   | 18   | 5.9 | 3   | 0.1612 | 2.7 |
| 4/19/2018 4:48 | 2.4 | 18   | 5.9 | 3   | 0.1557 | 2.7 |
| 4/19/2018 4:49 | 3.8 | 17.9 | 5.9 | 3   | 0.1693 | 2.7 |
| 4/19/2018 4:50 | 3.4 | 17.8 | 5.8 | 3   | 0.1577 | 2.8 |
| 4/19/2018 4:51 | 4.2 | 17.8 | 5.8 | 3   | 0.1701 | 2.8 |
| 4/19/2018 4:52 | 3.4 | 18   | 5.8 | 3   | 0.1629 | 2.9 |
| 4/19/2018 4:53 | 2   | 18.1 | 5.8 | 3   | 0.1557 | 2.6 |
| 4/19/2018 4:54 | 2.9 | 17.9 | 5.9 | 3   | 0.1686 | 2.6 |
| 4/19/2018 4:55 | 3.3 | 17.9 | 5.9 | 3   | 0.1643 | 2.7 |
| 4/19/2018 4:56 | 2.1 | 18.2 | 5.9 | 2.9 | 0.169  | 2.6 |
| 4/19/2018 4:57 | 2.4 | 18.2 | 5.9 | 2.9 | 0.156  | 2.5 |
| 4/19/2018 4:58 |     | 18.1 | 6   | 2.9 | 0.1664 | 2.5 |
| 4/19/2018 4:59 | 4.8 | 18.2 | 5.9 | 2.9 | 0.1641 | 2.6 |
| 4/19/2018 5:00 |     | 18.1 | 6   | 2.8 | 0.1542 | 2.7 |
| 4/19/2018 5:01 | 3.7 | 18.2 | 6   | 2.8 | 0.1668 | 2.7 |
| 4/19/2018 5:02 |     | 17.9 | 6.1 | 2.8 | 0.1507 | 2.5 |
| 4/19/2018 5:03 | 3.6 | 18   | 6.2 | 2.8 | 0.1636 | 2.4 |
| 4/19/2018 5:04 | 2.9 | 18.1 | 6.1 | 2.7 | 0.1564 | 2.5 |
| 4/19/2018 5:05 |     | 18.3 | 6.2 | 2.7 | 0.1561 | 2.6 |
| 4/19/2018 5:06 | 3.3 | 18   | 6.2 | 2.7 | 0.1699 | 2.6 |
| 4/19/2018 5:07 |     | 17.9 | 6.1 | 2.7 | 0.1527 | 2.6 |
| 4/19/2018 5:08 | 5   | 17.8 | 5.8 | 2.7 | 0.1686 | 2.4 |
| 4/19/2018 5:09 | 2.9 | 17.7 | 5.7 | 2.8 | 0.1585 | 2.1 |
| 4/19/2018 5:10 | 1.5 | 17.7 | 5.8 | 2.8 | 0.1649 | 2.1 |
| 4/19/2018 5:11 |     | 17.5 | 5.8 | 2.9 | 0.1683 | 2.4 |
| 4/19/2018 5:12 |     | 17.7 | 5.9 | 2.9 | 0.159  | 2.6 |
| 4/19/2018 5:13 |     | 17.7 | 5.8 | 3   | 0.1705 | 2.6 |
| 4/19/2018 5:14 |     | 17.6 | 5.9 | 3   | 0.155  | 2.8 |
| 4/19/2018 5:15 | 4.3 | 17.8 | 5.9 | 3.1 | 0.1664 | 2.8 |
| 4/19/2018 5:16 | 3.5 | 17.8 | 5.9 | 3.1 | 0.1722 | 2.9 |
| 4/19/2018 5:17 | 3.6 | 17.6 | 5.9 | 3.1 | 0.1517 | 2.8 |
| 4/19/2018 5:18 | 2.7 | 17.5 | 6   | 3.1 | 0.1673 | 2.7 |
| 4/19/2018 5:19 | 2.9 | 17.9 | 5.9 | 3.1 | 0.1561 | 2.7 |
| 4/19/2018 5:20 | 3.4 | 17.5 | 5.9 | 3.1 | 0.1731 | 2.7 |
| 4/19/2018 5:21 | 3.4 | 17.6 | 6.2 | 3.1 | 0.1645 | 2.8 |
| 4/19/2018 5:22 | 3   | 17.4 | 6.2 | 3.1 | 0.1614 | 2.8 |
| 4/19/2018 5:23 | 2.5 | 17.5 | 6.2 | 3.1 | 0.166  | 2.9 |
| 4/19/2018 5:24 | 2.4 | 17.6 | 6.3 | 3.1 | 0.1523 | 2.9 |
| 4/19/2018 5:25 | 2.6 | 17.4 | 6.7 | 3.1 | 0.1682 | 3   |
| 4/19/2018 5:26 | 2.3 | 17.5 | 6.7 | 3.1 | 0.1675 | 3   |
| 4/19/2018 5:27 | 1.8 | 17.3 | 6.8 | 3.1 | 0.1635 | 3   |
| 4/19/2018 5:28 | 1.4 | 17.7 | 6.8 | 3.1 | 0.1717 | 3   |
| 4/19/2018 5:29 | 2.7 | 17.4 | 7   | 3.1 | 0.1573 | 3   |
| 4/19/2018 5:30 | 2.6 | 17.2 | 6.6 | 3.2 | 0.1762 | 2.9 |

|                |     |      |     |     |        |     |
|----------------|-----|------|-----|-----|--------|-----|
| 4/19/2018 5:31 | 4   | 17.4 | 6.9 | 3.2 | 0.1585 | 2.9 |
| 4/19/2018 5:32 | 2.1 | 17.4 | 6.9 | 3.2 | 0.1743 | 2.8 |
| 4/19/2018 5:33 | 2   | 17.4 | 6.9 | 3.2 | 0.1691 | 2.8 |
| 4/19/2018 5:34 | 2.4 | 17.3 | 6.6 | 3.2 | 0.1685 | 2.8 |
| 4/19/2018 5:35 | 3.1 | 17.4 | 7.2 | 3.2 | 0.1762 | 2.7 |
| 4/19/2018 5:36 | 2.9 | 17.4 | 7.2 | 3.2 | 0.1617 | 2.8 |
| 4/19/2018 5:37 | 1.7 | 17.7 | 7.3 | 3.2 | 0.1745 | 2.8 |
| 4/19/2018 5:38 | 2.8 | 17.3 | 7.5 | 3.2 | 0.1722 | 2.8 |
| 4/19/2018 5:39 | 3.1 | 17.4 | 7.5 | 3.2 | 0.1698 | 2.8 |
| 4/19/2018 5:40 | 2.7 | 17.3 | 7.5 | 3.3 | 0.1795 | 2.9 |
| 4/19/2018 5:41 | 1.8 | 17.2 | 7.8 | 3.3 | 0.1665 | 2.7 |
| 4/19/2018 5:42 | 2.8 | 17.4 | 7.6 | 3.3 | 0.1835 | 2.8 |
| 4/19/2018 5:43 | 1.7 | 16.9 | 8.1 | 3.3 | 0.1732 | 2.7 |
| 4/19/2018 5:44 | 3.1 | 17.3 | 8.1 | 3.3 | 0.1811 | 2.7 |
| 4/19/2018 5:45 | 4.3 | 17.5 | 8.2 | 3.3 | 0.1731 | 2.5 |
| 4/19/2018 5:46 | 1.4 | 17.4 | 7.9 | 3.3 | 0.1746 | 2.3 |
| 4/19/2018 5:47 | 2.1 | 17.3 | 7.7 | 3.3 | 0.1787 | 2.3 |
| 4/19/2018 5:48 | 3.4 | 17.1 | 7.1 | 3.3 | 0.1672 | 2.5 |
| 4/19/2018 5:49 | 3.5 | 17.4 | 6.8 | 3.3 | 0.1778 | 2.6 |
| 4/19/2018 5:50 | 2.8 | 17.5 | 6.9 | 3.4 | 0.1734 | 2.7 |
| 4/19/2018 5:51 | 2.1 | 17.5 | 7   | 3.4 | 0.1739 | 2.7 |
| 4/19/2018 5:52 | 1.2 | 17.4 | 6.8 | 3.4 | 0.1751 | 2.9 |
| 4/19/2018 5:53 | 1.7 | 17.3 | 7.1 | 3.5 | 0.1686 | 2.8 |
| 4/19/2018 5:54 | 3.3 | 17.5 | 7.2 | 3.5 | 0.1752 | 2.8 |
| 4/19/2018 5:55 | 1.8 | 17.2 | 7.2 | 3.5 | 0.1673 | 2.9 |
| 4/19/2018 5:56 | 2.9 | 17.2 | 7.2 | 3.6 | 0.1847 | 3.1 |
| 4/19/2018 5:57 | 2.1 | 17.2 | 7.1 | 3.6 | 0.1816 | 3.1 |
| 4/19/2018 5:58 | 2.1 | 17.3 | 7.3 | 3.6 | 0.1726 | 3.1 |
| 4/19/2018 5:59 | 2.6 | 17.2 | 7.5 | 3.6 | 0.1921 | 3.1 |
| 4/19/2018 6:00 | 1.5 | 17.3 | 7.5 | 3.6 | 0.1653 | 3.2 |
| 4/19/2018 6:01 | 2.2 | 17.4 | 7.6 | 3.6 | 0.181  | 3   |
| 4/19/2018 6:02 | 2.9 | 17.2 | 7.6 | 3.7 | 0.1791 | 2.9 |
| 4/19/2018 6:03 | 1.8 | 17   | 7.5 | 3.7 | 0.1721 | 3   |
| 4/19/2018 6:04 | 2   | 17.1 | 7.7 | 3.7 | 0.1792 | 3.1 |
| 4/19/2018 6:05 | 3.5 | 17.1 | 7.9 | 3.7 | 0.1618 | 3.2 |
| 4/19/2018 6:06 | 3.8 | 17.1 | 7.9 | 3.7 | 0.1845 | 3.2 |
| 4/19/2018 6:07 | 1.3 | 17.1 | 8.1 | 3.8 | 0.1744 | 3.2 |
| 4/19/2018 6:08 | 2.8 | 17.1 | 8   | 3.8 | 0.1716 | 3.2 |
| 4/19/2018 6:09 | 1.8 | 17.3 | 8.1 | 3.8 | 0.1777 | 3.2 |
| 4/19/2018 6:10 | 2.4 | 17   | 7.9 | 3.8 | 0.1713 | 3.3 |
| 4/19/2018 6:11 | 1.8 | 17.3 | 7.7 | 3.8 | 0.1914 | 3.3 |
| 4/19/2018 6:12 | 0.9 | 17.4 | 7.8 | 3.9 | 0.1773 | 3.3 |
| 4/19/2018 6:13 | 1.7 | 17.1 | 8   | 3.9 | 0.176  | 3.4 |
| 4/19/2018 6:14 | 2.6 | 16.9 | 8   | 3.9 | 0.1827 | 3.4 |
| 4/19/2018 6:15 | 2.8 | 17.1 | 8   | 3.9 | 0.1731 | 3.4 |
| 4/19/2018 6:16 | 3.6 | 17   | 8.3 | 4   | 0.1825 | 3.4 |
| 4/19/2018 6:17 | 3.3 | 17.2 | 8.1 | 4   | 0.1733 | 3.4 |

|                |     |      |     |     |        |     |
|----------------|-----|------|-----|-----|--------|-----|
| 4/19/2018 6:18 | 3.2 | 17.3 | 8.4 | 4   | 0.1755 | 3.4 |
| 4/19/2018 6:19 | 3.2 | 17   | 8.1 | 4   | 0.1919 | 2.8 |
| 4/19/2018 6:20 | 2.1 | 17.1 | 8   | 4.1 | 0.1763 | 2.3 |
| 4/19/2018 6:21 | 2.3 | 17.3 | 8.1 | 4.1 | 0.1852 | 2.5 |
| 4/19/2018 6:22 | 1.9 | 17.2 | 8   | 4.1 | 0.1746 | 2.9 |
| 4/19/2018 6:23 | 2   | 17.4 | 8.2 | 4.1 | 0.1747 | 3   |
| 4/19/2018 6:24 | 3.2 | 17.1 | 8.2 | 4.1 | 0.1854 | 3   |
| 4/19/2018 6:25 | 3   | 17   | 8.2 | 4.1 | 0.177  | 3   |
| 4/19/2018 6:26 | 3   | 16.9 | 8.3 | 4.2 | 0.1846 | 3   |
| 4/19/2018 6:27 | 2.4 | 17.2 | 8.5 | 4.2 | 0.1779 | 2.9 |
| 4/19/2018 6:28 | 1.9 | 17.2 | 8.3 | 4.2 | 0.1855 | 3   |
| 4/19/2018 6:29 | 2.8 | 17.3 | 8   | 4.2 | 0.1831 | 3.1 |
| 4/19/2018 6:30 | 2.1 | 17.1 | 8   | 4.2 | 0.1769 | 3.1 |
| 4/19/2018 6:31 | 3   | 17.4 | 8.1 | 4.2 | 0.1869 | 3.1 |
| 4/19/2018 6:32 | 1.4 | 17.1 | 8.2 | 4.2 | 0.1753 | 2.8 |
| 4/19/2018 6:33 | 1.7 | 17.2 | 8   | 4.2 | 0.184  | 2   |
| 4/19/2018 6:34 | 2.4 | 17.1 | 8   | 4.2 | 0.1826 | 1.8 |
| 4/19/2018 6:35 | 2.9 | 17.4 | 8.1 | 4.2 | 0.1762 | 1.7 |
| 4/19/2018 6:36 | 1.3 | 17.2 | 8.2 | 4.2 | 0.1895 | 1.6 |
| 4/19/2018 6:37 | 2.8 | 17.3 | 8.1 | 4.2 | 0.1717 | 1.8 |
| 4/19/2018 6:38 | 2.9 | 17.1 | 8.1 | 4.2 | 0.1854 | 1.7 |
| 4/19/2018 6:39 | 2.4 | 17.2 | 8.4 | 4.2 | 0.1773 | 1.6 |
| 4/19/2018 6:40 | 2.7 | 17.4 | 8.4 | 4.2 | 0.1865 | 1.5 |
| 4/19/2018 6:41 | 3   | 17.2 | 8.3 | 4.2 | 0.1754 | 1.6 |
| 4/19/2018 6:42 | 4.1 | 17.4 | 8.2 | 4.1 | 0.1713 | 1.7 |
| 4/19/2018 6:43 | 1.3 | 17.2 | 8.4 | 4.1 | 0.1817 | 1.6 |
| 4/19/2018 6:44 | 2.4 | 17.5 | 8.3 | 4.1 | 0.1798 | 1.7 |
| 4/19/2018 6:45 | 4   | 17.3 | 8.2 | 4.1 | 0.1812 | 1.8 |
| 4/19/2018 6:46 | 2.8 | 17.4 | 8   | 4.1 | 0.1776 | 1.7 |
| 4/19/2018 6:47 | 1.5 | 17.2 | 8.1 | 4.1 | 0.1708 | 1.7 |
| 4/19/2018 6:48 | 3.2 | 17.4 | 8.2 | 4.1 | 0.1869 | 1.8 |
| 4/19/2018 6:49 | 3.1 | 17.4 | 8.2 | 4.1 | 0.1739 | 1.8 |
| 4/19/2018 6:50 | 3.3 | 17.3 | 8.2 | 4.1 | 0.1887 | 1.9 |
| 4/19/2018 6:51 | 3   | 17.2 | 8.2 | 4.1 | 0.1793 | 2   |
| 4/19/2018 6:52 | 2.7 | 17.4 | 8.1 | 4.1 | 0.1808 | 2.1 |
| 4/19/2018 6:53 | 3.2 | 17.5 | 8.2 | 4.2 | 0.1949 | 2.2 |
| 4/19/2018 6:54 | 4.5 | 17.2 | 8.3 | 4.2 | 0.1751 | 2.3 |
| 4/19/2018 6:55 | 1.4 | 17.3 | 8.3 | 4.2 | 0.1835 | 2.2 |
| 4/19/2018 6:56 | 2.2 | 17.3 | 8.2 | 4.2 | 0.1821 | 2.3 |
| 4/19/2018 6:57 | 2.3 | 17.2 | 8.2 | 4.2 | 0.1802 | 2.3 |
| 4/19/2018 6:58 | 1.7 | 17.3 | 8.3 | 4.3 | 0.1847 | 2.4 |
| 4/19/2018 6:59 | 2.6 | 17.3 | 8.3 | 4.3 | 0.1768 | 2.5 |
| 4/19/2018 7:00 | 2.2 | 17   | 8.3 | 4.3 | 0.1856 | 2.5 |
| 4/19/2018 7:01 | 1.5 | 17.1 | 8.5 | 4.3 | 0.1772 | 2.5 |
| 4/19/2018 7:02 | 3.2 | 17.2 | 8.5 | 4.4 | 0.1859 | 2.5 |
| 4/19/2018 7:03 | 3.7 | 17.2 | 8.6 | 4.4 | 0.1731 | 2.5 |
| 4/19/2018 7:04 | 2   | 17.2 | 8.5 | 4.4 | 0.1784 | 2.4 |

|                |     |      |     |      |      |     |        |     |
|----------------|-----|------|-----|------|------|-----|--------|-----|
| 4/19/2018 7:05 |     |      | 3   | 17.2 | 8.5  | 4.4 | 0.1903 | 2.4 |
| 4/19/2018 7:06 |     |      | 3.3 | 17   | 8.3  | 4.4 | 0.1761 | 2.4 |
| 4/19/2018 7:07 |     |      | 2.1 | 17.1 | 8.4  | 4.5 | 0.1837 | 2.5 |
| 4/19/2018 7:08 |     |      | 2.2 | 17.1 | 8.2  | 4.5 | 0.1844 | 2.6 |
| 4/19/2018 7:09 |     |      | 3.7 | 17.3 | 8.3  | 4.5 | 0.1744 | 2.5 |
| 4/19/2018 7:10 |     |      | 2   | 17.3 | 8.5  | 4.6 | 0.1856 | 2.5 |
| 4/19/2018 7:11 |     |      | 2.8 | 17.4 | 8.4  | 4.6 | 0.1757 | 2.4 |
| 4/19/2018 7:12 |     |      | 3.1 | 17.2 | 8.6  | 4.6 | 0.19   | 2.3 |
| 4/19/2018 7:13 |     |      | 0.9 | 17   | 8.6  | 4.7 | 0.178  | 2.3 |
| 4/19/2018 7:14 |     |      | 1.1 | 17.2 | 8.8  | 4.7 | 0.1822 | 2.3 |
| 4/19/2018 7:15 |     |      | 2.3 | 17.3 | 8.9  | 4.8 | 0.19   | 2.2 |
| 4/19/2018 7:16 |     |      | 2.5 | 17.3 | 9    | 4.8 | 0.1804 | 2.1 |
| 4/19/2018 7:17 |     |      | 3.5 | 17.2 | 8.9  | 4.9 | 0.1951 | 2.1 |
| 4/19/2018 7:18 |     |      | 2.6 | 17.5 | 8.9  | 4.9 | 0.1852 | 2.2 |
| 4/19/2018 7:19 |     |      | 3.1 | 17.2 | 8.9  | 5   | 0.1835 | 2.3 |
| 4/19/2018 7:20 |     |      | 3.3 | 17.3 | 8.9  | 5   | 0.1862 | 2.3 |
| 4/19/2018 7:21 |     |      | 2.6 | 17.2 | 8.8  | 5.1 | 0.177  | 2.3 |
| 4/19/2018 7:22 |     |      | 3.2 | 17   | 9    | 5.2 | 0.1942 | 2.3 |
| 4/19/2018 7:23 |     |      | 2.8 | 17.3 | 9.1  | 5.2 | 0.1879 | 2.3 |
| 4/19/2018 7:24 |     |      | 2.7 | 17.3 | 8.9  | 5.3 | 0.1889 | 2.1 |
| 4/19/2018 7:25 |     |      | 3.6 | 17.5 | 8.9  | 5.3 | 0.1945 | 1.8 |
| 4/19/2018 7:26 |     |      | 2.1 | 17.3 | 8.9  | 5.3 | 0.1827 | 2   |
| 4/19/2018 7:27 |     |      | 4.5 | 17.3 | 9    | 5.4 | 0.2103 | 1.5 |
| 4/19/2018 7:28 |     |      | 2.2 | 17.3 | 9.1  | 5.4 | 0.2269 | 1.4 |
| 4/19/2018 7:29 |     |      | 4.9 | 17.1 | 9.1  | 5.5 | 0.2312 | 1.4 |
| 4/19/2018 7:30 |     |      | 3   | 17.2 | 8.9  | 5.5 | 0.2427 | 1.4 |
| 4/19/2018 7:31 |     |      | 2.3 | 17.1 | 9.1  | 5.5 | 0.2362 | 1.4 |
| 4/19/2018 7:32 |     |      | 2.3 | 17   | 9.4  | 5.6 | 0.2404 | 1.4 |
| 4/19/2018 7:33 |     |      | 4.1 | 20   | 9.3  | 5.6 | 0.231  | 1.4 |
| 4/19/2018 7:34 |     |      | 3.8 | 14.6 | 9.1  | 5.7 | 0.2388 | 1.4 |
| 4/19/2018 7:35 |     |      | 3.2 | 15.8 | 9.3  | 5.8 | 0.2457 | 1.4 |
| 4/19/2018 7:36 |     |      | 4   | 16.9 | 9.4  | 5.8 | 0.2437 | 1.4 |
| 4/19/2018 7:37 |     |      | 3.2 | 17   | 9.6  | 5.9 | 0.2491 | 1.4 |
| 4/19/2018 7:38 |     |      | 4.3 | 17   | 9.4  | 5.9 | 0.239  | 1.4 |
| 4/19/2018 7:39 |     |      | 3   | 17.2 | 9.5  | 6   | 0.2478 | 1.4 |
| 4/19/2018 7:40 |     |      | 2.9 | 17.1 | 9.6  | 6   | 0.2465 | 1.4 |
| 4/19/2018 7:41 |     |      | 2.9 | 17.1 | 9.4  | 6   | 0.2305 | 1.4 |
| 4/19/2018 7:42 |     |      | 2.9 | 17.2 | 9.4  | 6   | 0.2461 | 1.4 |
| 4/19/2018 7:43 |     |      | 2.6 | 17.1 | 9.5  | 6   | 0.2352 | 1.4 |
| 4/19/2018 7:44 | 0.2 | 0.1  | 1.9 | 17.2 | 9.4  | 6   | 0.2491 | 1.4 |
| 4/19/2018 7:45 | 0.1 | 0.2  | 2.2 | 17.2 | 9.2  | 6   | 0.2415 | 1.4 |
| 4/19/2018 7:46 | 0.1 | 0.1  | 1.8 | 17.3 | 9.2  | 6   | 0.2438 | 1.4 |
| 4/19/2018 7:47 | 0.1 | 0    | 2.8 | 17.3 | 9.4  | 6   | 0.2542 | 1.4 |
| 4/19/2018 7:48 | 0.1 | 0.3  | 3.4 | 17.1 | 9.3  | 6   | 0.2387 | 1.4 |
| 4/19/2018 7:49 | 0.1 | 0.5  | 3.1 | 17   | 9.3  | 6   | 0.2556 | 1.5 |
| 4/19/2018 7:50 | 0.1 | -0.5 | 4.2 | 16.9 | 9.2  | 6   | 0.2465 | 1.4 |
| 4/19/2018 7:51 | 0.1 | 0    | 2.4 | 17   | 10.3 | 6.1 | 0.2459 | 1.4 |

|                |     |      |      |      |       |       |         |     |
|----------------|-----|------|------|------|-------|-------|---------|-----|
| 4/19/2018 7:52 | 0.2 | -0.2 | 2.8  | 17.3 | 18.6  | 53.3  | 0.2462  | 1.4 |
| 4/19/2018 7:53 | 0.2 | -0.4 | 3.4  | 17.2 | 19.9  | 87.1  | 0.2432  | 1.4 |
| 4/19/2018 7:54 | 0.3 | -0.2 |      | 17   | 19.6  | 87    | 0.2441  | 1.5 |
| 4/19/2018 7:55 | 0.3 | -0.2 |      | 17.1 | 11.9  | 16.7  | 0.2557  | 1.5 |
| 4/19/2018 7:56 | 0.3 | 0.1  |      | 17.1 | 9.3   | 6.2   | 0.2398  | 1.5 |
| 4/19/2018 7:57 | 0.3 | -0.2 |      | 17.4 | 9.4   | 6.4   | 0.2383  | 1.5 |
| 4/19/2018 7:58 | 0.3 | 0.2  | 6.7  | 24.2 | 24.6  | 20    | 0.3684  | 1.5 |
| 4/19/2018 7:59 | 0.3 | 0.6  |      | 27.9 | 61.7  | 136.9 | 0.6815  | 1.6 |
| 4/19/2018 8:00 | 0.2 | 0.4  | 6.7  | 28.6 | 83.6  | 328.2 | 0.892   | 1.6 |
| 4/19/2018 8:01 | 0.3 | 0.2  |      | 30.4 | 111.2 | 454.6 | 1.3373  | 1.6 |
| 4/19/2018 8:02 | 0.3 | 0.9  | 9.1  | 31.3 | 128.2 | 586.9 | 2.1125  | 1.6 |
| 4/19/2018 8:03 | 0.3 | -0.3 | 7.4  | 32.9 | 122.6 | 611.8 | 2.9396  | 1.6 |
| 4/19/2018 8:04 | 0.3 | 0.3  | 9.6  | 33.7 | 118.6 | 528.9 | 4.1368  | 1.7 |
| 4/19/2018 8:05 | 0.3 | 0.6  | 6.1  | 33.8 | 111.8 | 479.3 | 5.0083  | 1.7 |
| 4/19/2018 8:06 | 0.3 | 0.2  | 10.8 | 36.6 | 116   | 487.7 | 6.6066  | 1.8 |
| 4/19/2018 8:07 | 0.3 | -0.6 | 7.2  | 36.3 | 113.5 | 487.6 | 7.9257  | 1.8 |
| 4/19/2018 8:08 | 0.2 | 0.4  | 8.5  | 35.1 | 112.7 | 469.7 | 8.2484  | 1.8 |
| 4/19/2018 8:09 | 0.2 | 0.4  | 7.8  | 33.8 | 111.5 | 470.7 | 8.775   | 1.7 |
| 4/19/2018 8:10 | 0.2 | 0    | 6.8  | 34.6 | 114.2 | 469.1 | 10.405  | 1.7 |
| 4/19/2018 8:11 | 0.2 | 0.3  | 7.4  | 37   | 126.3 | 528.1 | 11.475  | 1.8 |
| 4/19/2018 8:12 | 0.2 | 0.3  | 8.5  | 39.4 | 137.3 | 580.2 | 14.605  | 1.9 |
| 4/19/2018 8:13 | 0.2 | 0.1  | 7.3  | 39.3 | 143   | 630.4 | 15.3492 | 1.9 |
| 4/19/2018 8:14 | 0.2 | 0.1  | 7.9  | 38.1 | 138.8 | 625   | 14.6042 | 1.9 |
| 4/19/2018 8:15 | 0.2 | -0.1 | 8.9  | 37.7 | 137.5 | 624   | 14.7217 | 1.9 |
| 4/19/2018 8:16 | 0.2 | 0.3  | 7.6  | 37.5 | 134.8 | 613.4 | 15.0508 | 1.9 |
| 4/19/2018 8:17 | 0.1 | -0.4 | 8.7  | 36.3 | 134.7 | 614.5 | 15.3108 | 1.9 |
| 4/19/2018 8:18 | 0.1 | 0.6  | 7.8  | 33.7 | 125.4 | 608.3 | 14.4075 | 2   |
| 4/19/2018 8:19 | 0.1 | 0.3  | 7.8  | 34.1 | 126.1 | 591.8 | 14.9692 | 2   |
| 4/19/2018 8:20 | 0.1 | -0.5 | 7.2  | 34.1 | 123.8 | 588.2 | 15.1267 | 1.8 |
| 4/19/2018 8:21 | 0.1 | -0.2 | 7.2  | 33.5 | 122.3 | 587.5 | 15.3092 | 1.8 |
| 4/19/2018 8:22 | 0.1 | 0.1  | 7.3  | 32.9 | 120.6 | 584.6 | 15.5558 | 2   |
| 4/19/2018 8:23 | 0.1 | 0.2  | 6.9  | 31.2 | 112.5 | 550.9 | 14.4242 | 2   |
| 4/19/2018 8:24 | 0.1 | 0    | 7.4  | 31.8 | 114.6 | 561.9 | 15.0383 | 1.8 |
| 4/19/2018 8:25 | 0.1 | -0.2 | 7.2  | 29.4 | 108.1 | 548.5 | 14.1517 | 1.9 |
| 4/19/2018 8:26 | 0.1 | 0.4  | 7.5  | 28.8 | 103.1 | 509.3 | 13.0958 | 2.1 |
| 4/19/2018 8:27 | 0.1 | -0.2 | 8    | 29.4 | 101.3 | 491.9 | 13.7908 | 2.1 |
| 4/19/2018 8:28 | 0.1 | -0.1 | 6.2  | 28.5 | 100.8 | 506   | 13.8258 | 1.8 |
| 4/19/2018 8:29 | 0.1 | 0.3  | 7.6  | 29.8 | 103.5 | 513.8 | 14.1458 | 1.9 |
| 4/19/2018 8:30 | 0.1 | 0.5  | 5.4  | 28.9 | 100.5 | 523.9 | 14.5125 | 2   |
| 4/19/2018 8:31 | 0.1 | 0.3  | 6.2  | 28.2 | 98.4  | 510.8 | 13.8392 | 1.8 |
| 4/19/2018 8:32 | 0.1 | 0.8  | 7.2  | 28.4 | 101.2 | 506.3 | 14.3317 | 1.9 |
| 4/19/2018 8:33 | 0.1 | 0.8  | 7.2  | 27.8 | 96.3  | 508.2 | 14.3342 | 2.1 |
| 4/19/2018 8:34 | 0.1 | 0.3  | 6.9  | 27.3 | 93.9  | 504.3 | 13.7125 | 2.1 |
| 4/19/2018 8:35 | 0.1 | 0.6  | 6.3  | 27.3 | 92.4  | 470.3 | 13.3933 | 2.2 |
| 4/19/2018 8:36 | 0.1 | -0.8 | 5.8  | 27.6 | 94.8  | 486.3 | 14.1775 | 2.2 |
| 4/19/2018 8:37 | 0.1 | 0.3  | 6.1  | 26.8 | 92.3  | 479.6 | 13.9342 | 2.2 |
| 4/19/2018 8:38 | 0.1 | 0.2  | 6.8  | 27.1 | 91.6  | 481.7 | 13.99   | 2.2 |

|                |     |      |     |      |      |       |         |     |
|----------------|-----|------|-----|------|------|-------|---------|-----|
| 4/19/2018 8:39 | 0.2 | 0    | 6.1 | 26.2 | 89.4 | 477   | 13.5483 | 2.2 |
| 4/19/2018 8:40 | 0.2 | -0.3 | 6.1 | 25.5 | 82.8 | 447.7 | 12.66   | 2.3 |
| 4/19/2018 8:41 | 0.2 | 0.8  | 6.8 | 26.6 | 87.1 | 445.2 | 13.4492 | 2.2 |
| 4/19/2018 8:42 | 0.1 | 0    | 6.4 | 25.6 | 85.8 | 471   | 13.3958 | 2.2 |
| 4/19/2018 8:43 | 0.2 | 0.3  | 6.5 | 26.1 | 87   | 468.1 | 13.6542 | 2.2 |
| 4/19/2018 8:44 | 0.2 | 0.8  | 6.5 | 25.4 | 84   | 460.5 | 13.2425 | 2.2 |
| 4/19/2018 8:45 | 0.2 | 0.2  | 6.8 | 25.1 | 79.6 | 447.5 | 12.7158 | 2.2 |
| 4/19/2018 8:46 | 0.2 | 0.1  | 6.9 | 24.7 | 80.8 | 449.7 | 13.1733 | 2.3 |
| 4/19/2018 8:47 | 0.2 | 0.6  | 6.6 | 25   | 79   | 434.2 | 12.6067 | 1.9 |
| 4/19/2018 8:48 | 0.3 | 0.6  | 5.9 | 24.4 | 79   | 421.9 | 12.78   | 1.7 |
| 4/19/2018 8:49 | 0.3 | 0.5  | 5.5 | 24.7 | 75.6 | 408.1 | 12.335  | 1.8 |
| 4/19/2018 8:50 | 0.3 | 0.8  | 7.5 | 24.6 | 76.2 | 410.7 | 12.5533 | 1.9 |
| 4/19/2018 8:51 | 0.3 | 0.7  | 5.2 | 24.3 | 75.7 | 417.9 | 12.6642 | 2   |
| 4/19/2018 8:52 | 0.2 | 0.4  | 5.8 | 24.3 | 74.5 | 414.6 | 12.5417 | 2.2 |
| 4/19/2018 8:53 | 0.2 | 0.1  | 5.4 | 22.7 | 66.3 | 404.8 | 11.2683 | 2.4 |
| 4/19/2018 8:54 | 0.2 | 0.6  | 5.4 | 23.1 | 67.2 | 374   | 11.2342 | 2.5 |
| 4/19/2018 8:55 | 0.2 | 0.3  | 6.2 | 24   | 69.1 | 389   | 11.9408 | 2.5 |
| 4/19/2018 8:56 | 0.2 | 1.2  | 6.2 | 23.6 | 70.3 | 404.6 | 12.0392 | 2.6 |
| 4/19/2018 8:57 | 0.2 | 0.2  | 5.7 | 24   | 70.1 | 398.3 | 12.1417 | 2.6 |
| 4/19/2018 8:58 | 0.2 | -0.2 | 5   | 22.6 | 65.3 | 396   | 11.4008 | 2.6 |
| 4/19/2018 8:59 | 0.2 | 0.5  | 4.8 | 22.4 | 63.2 | 353.4 | 10.6117 | 2.5 |
| 4/19/2018 9:00 | 0.2 | -0.1 | 6.3 | 23   | 65.3 | 387.2 | 11.4425 | 2.6 |
| 4/19/2018 9:01 | 0.2 | 0.3  | 5   | 23.3 | 65.6 | 381   | 11.5225 | 2.5 |
| 4/19/2018 9:02 | 0.2 | 0.6  | 5.7 | 22.6 | 64.8 | 379.2 | 11.335  | 2.5 |
| 4/19/2018 9:03 | 0.2 | 0.1  | 5.7 | 22.7 | 62.9 | 350.6 | 11.0858 | 2.6 |
| 4/19/2018 9:04 | 0.2 | 0.7  | 4.7 | 22.5 | 63.4 | 375.6 | 11.2608 | 2.5 |
| 4/19/2018 9:05 | 0.2 | 1.1  | 3.9 | 21.8 | 58.6 | 359.2 | 10.32   | 2.5 |
| 4/19/2018 9:06 | 0.2 | 0    | 4.4 | 22.2 | 57.9 | 350.1 | 10.3175 | 2.5 |
| 4/19/2018 9:07 | 0.2 | -0.2 | 5.9 | 22.1 | 58.6 | 333.6 | 10.5633 | 2.6 |
| 4/19/2018 9:08 | 0.2 | 0.1  | 5.3 | 22   | 59.1 | 347.5 | 10.6825 | 2.6 |
| 4/19/2018 9:09 | 0.3 | 0.1  | 4.9 | 22.1 | 56.5 | 335.1 | 10.1908 | 2.6 |
| 4/19/2018 9:10 | 0.3 | 0.3  | 4.7 | 21.9 | 56   | 329.5 | 10.2208 | 2.6 |
| 4/19/2018 9:11 | 0.3 | 0.3  | 5   | 21.3 | 55.8 | 349.3 | 10.1122 | 2.6 |
| 4/19/2018 9:12 | 0.3 | 0.2  | 5.7 | 21.5 | 55.7 | 339.4 | 10.2093 | 2.5 |
| 4/19/2018 9:13 | 0.3 | 0.2  | 5.1 | 21.3 | 53.4 | 335   | 9.7735  | 2.5 |
| 4/19/2018 9:14 | 0.3 | 0    | 5   | 20.7 | 52.7 | 332.6 | 9.6279  | 2.5 |
| 4/19/2018 9:15 | 0.3 | 0.4  | 4.4 | 21   | 51.2 | 319.5 | 9.3862  | 2.5 |
| 4/19/2018 9:16 | 0.2 | -0.1 | 4.9 | 21.3 | 52.1 | 309.6 | 9.6565  | 2.5 |
| 4/19/2018 9:17 | 0.2 | 0    | 4   | 20.9 | 50.3 | 306.3 | 9.3394  | 2.5 |
| 4/19/2018 9:18 | 0.2 | 0.7  | 5.8 | 21   | 51.9 | 323   | 9.7379  | 2.4 |
| 4/19/2018 9:19 | 0.2 | 0    | 5.5 | 21   | 49.3 | 300.5 | 9.1933  | 2.5 |
| 4/19/2018 9:20 | 0.2 | 0.2  | 4.5 | 21   | 50.5 | 311.7 | 9.5838  | 2.6 |
| 4/19/2018 9:21 | 0.3 | 0.5  | 5.1 | 20.1 | 49.7 | 321.2 | 9.3516  | 2.6 |
| 4/19/2018 9:22 | 0.3 | 0.6  | 4.1 | 21   | 48.3 | 293.8 | 9.2313  | 2.7 |
| 4/19/2018 9:23 | 0.3 | 0.3  | 4.6 | 20.5 | 47.8 | 292.9 | 9.0326  | 2.8 |
| 4/19/2018 9:24 | 0.3 | 0.7  | 4.6 | 20.4 | 46.4 | 288.9 | 8.7379  | 2.8 |
| 4/19/2018 9:25 | 0.2 | 0.2  | 4.3 | 20.3 | 45   | 264.2 | 8.3636  | 2.8 |



|                 |     |      |     |      |       |       |        |     |
|-----------------|-----|------|-----|------|-------|-------|--------|-----|
| 4/19/2018 9:26  | 0.2 | -0.1 | 4.6 | 19.8 | 44.3  | 268.7 | 7.9759 | 2.7 |
| 4/19/2018 9:27  | 0.2 | 0.6  | 4.3 | 18.5 | 44.3  | 227.1 | 6.4286 | 2.7 |
| 4/19/2018 9:28  | 0.4 | 1.4  | 3   | 18.1 | 41.2  | 164.3 | 4.9053 | 2.7 |
| 4/19/2018 9:29  | 0.6 | 0.7  | 3.5 | 17.9 | 31.4  | 141.6 | 4.4562 | 2.7 |
| 4/19/2018 9:30  | 0.7 | 0.5  | 4.7 | 17.9 | 30.6  | 134   | 4.139  | 2.7 |
| 4/19/2018 9:31  | 0.7 | 1.1  | 3   | 18   | 30.6  | 131.8 | 4.1158 | 2.6 |
| 4/19/2018 9:32  | 0.8 | 1    | 4.1 | 17.9 | 30.4  | 125.3 | 4.0127 | 2.6 |
| 4/19/2018 9:33  | 0.8 | 1    | 3.1 | 17.8 | 30.1  | 124.1 | 3.9691 | 2.5 |
| 4/19/2018 9:34  | 0.9 | 1    | 3.3 | 17.8 | 28.2  | 106.4 | 3.3829 | 2.5 |
| 4/19/2018 9:35  | 1   | 1.2  | 4.6 | 17.7 | 26.9  | 92.9  | 2.9733 | 2.5 |
| 4/19/2018 9:36  | 1.1 | 1.7  | 3.8 | 17.8 | 27    | 98.9  | 2.9994 | 2.5 |
| 4/19/2018 9:37  | 1.2 | 1.5  | 2.4 | 17.6 | 26.5  | 88.6  | 2.9718 | 2.4 |
| 4/19/2018 9:38  | 1.2 | 1.5  | 4.5 | 18   | 25.7  | 80.4  | 2.5839 | 2.4 |
| 4/19/2018 9:39  | 1.2 | 1.1  | 2   | 17.7 | 25.8  | 77.2  | 2.7223 | 2.5 |
| 4/19/2018 9:40  | 1.3 | 1.6  | 4.6 | 17.8 | 24.4  | 68.6  | 2.4175 | 2.5 |
| 4/19/2018 9:41  | 1.4 | 2.3  | 4.3 | 17.6 | 23.8  | 66.9  | 2.2943 | 2.5 |
| 4/19/2018 9:42  | 1.6 | 2.1  | 4.6 | 17.9 | 22.5  | 53.7  | 1.8758 | 2.6 |
| 4/19/2018 9:43  | 1.7 | 1.8  | 2.9 | 17.7 | 23.2  | 54.6  | 2.0558 | 2.6 |
| 4/19/2018 9:44  | 1.9 | 2.4  | 3.5 | 18.1 | 21.9  | 48.2  | 1.7283 | 2.6 |
| 4/19/2018 9:45  | 2   | 2.6  | 4.1 | 18.1 | 21.4  | 45.1  | 1.6265 | 2.5 |
| 4/19/2018 9:46  | 2   | 1.7  | 3.3 | 17.6 | 22.4  | 48    | 1.8238 | 2.6 |
| 4/19/2018 9:47  | 2   | 2.9  | 3.6 | 18.2 | 21.8  | 44.7  | 1.623  | 2.7 |
| 4/19/2018 9:48  | 1.9 | 2    | 2.2 | 17.6 | 22.3  | 46.8  | 1.6681 | 2.7 |
| 4/19/2018 9:49  | 1.7 | 2    | 3.1 | 17.5 | 22.9  | 50.4  | 1.7107 | 2.6 |
| 4/19/2018 9:50  | 1.7 | 2.2  | 3.3 | 18.2 | 21    | 39.4  | 1.3893 | 2.5 |
| 4/19/2018 9:51  | 1.9 | 2.6  | 3.5 | 17.9 | 20.5  | 37.6  | 1.3524 | 2.4 |
| 4/19/2018 9:52  | 2.2 | 2.3  | 4.6 | 18.2 | 21    | 35.1  | 1.2981 | 2.4 |
| 4/19/2018 9:53  | 2.4 | 4.1  | 4.2 | 18.4 | 20    | 29.2  | 1.1551 | 2.3 |
| 4/19/2018 9:54  | 2.6 | 2.3  | 4.6 | 18.1 | 19.3  | 23.7  | 1.0615 | 2.4 |
| 4/19/2018 9:55  | 2.7 | 2.5  | 3.8 | 18.5 | 19.7  | 23.9  | 1.0338 | 2.3 |
| 4/19/2018 9:56  | 2.7 | 2.6  | 3.4 | 18.1 | 19.7  | 23.7  | 1.02   | 2.3 |
| 4/19/2018 9:57  | 2.7 | 3.4  | 5   | 18.7 | 19.1  | 23.7  | 0.9631 | 2.3 |
| 4/19/2018 9:58  | 2.8 | 2.8  | 3.6 | 18.5 | 19.5  | 23.4  | 0.9423 | 2.4 |
| 4/19/2018 9:59  | 2.7 | 2    | 4.1 | 18.1 | 19.6  | 23    | 0.9323 | 2.5 |
| 4/19/2018 10:00 | 2.7 | 3.3  | 3.9 | 19.1 | 18.5  | 22.4  | 0.8251 | 2.5 |
| 4/19/2018 10:01 | 3   | 3.6  | 4.6 | 19   | 17.8  | 21.6  | 0.7862 | 2.4 |
| 4/19/2018 10:02 | 2.9 | 2    | 2.5 | 17.3 | 19.1  | 20.7  | 0.8527 | 2.4 |
| 4/19/2018 10:03 | 2.3 | 1.1  | 2.6 | 17   | 20.7  | 19.6  | 0.8876 | 2.4 |
| 4/19/2018 10:04 | 1.5 | 1.1  | 3   | 20.9 | 27.8  | 20.2  | 1.0023 | 2.4 |
| 4/19/2018 10:05 | 0.8 | 0.5  | 3.2 | 27.1 | 63.7  | 85.7  | 1.4162 | 2.5 |
| 4/19/2018 10:06 | 0.5 | 0    | 4.3 | 24.8 | 76.2  | 279.5 | 1.4513 | 2.5 |
| 4/19/2018 10:07 | 0.2 | 0.5  | 5.1 | 25.3 | 113.8 | 417.3 | 1.695  | 2.5 |
| 4/19/2018 10:08 | 0.2 | 0.1  | 4.5 | 25.3 | 122.1 | 561.5 | 1.9745 | 2.6 |
| 4/19/2018 10:09 | 0.2 | 0.2  | 6   | 28.6 | 150.3 | 678.4 | 3.0793 | 2.7 |
| 4/19/2018 10:10 | 0.2 | 0.4  | 5.4 | 31.7 | 154.9 | 714.4 | 4.2482 | 2.6 |
| 4/19/2018 10:11 | 0.2 | 0.3  | 5.8 | 35.1 | 162.4 | 757.6 | 5.9052 | 2.8 |
| 4/19/2018 10:12 | 0.2 | 0.9  | 7.4 | 37.2 | 162.2 | 759.6 | 7.6607 | 2.8 |

|                 |     |      |     |      |       |       |         |     |
|-----------------|-----|------|-----|------|-------|-------|---------|-----|
| 4/19/2018 10:13 | 0.1 | 0.6  | 7.2 | 37.3 | 161.4 | 731.2 | 8.479   | 2.9 |
| 4/19/2018 10:14 | 0.1 | 0.1  | 6.9 | 36.9 | 151.4 | 717.7 | 8.8392  | 2.9 |
| 4/19/2018 10:15 | 0.1 | -0.1 | 5.6 | 36.4 | 146.8 | 697.2 | 9.8823  | 2.9 |
| 4/19/2018 10:16 | 0.1 | 0.9  | 5.4 | 37.6 | 152.3 | 691.7 | 10.7135 | 2.9 |
| 4/19/2018 10:17 | 0.1 | 0.5  | 7.4 | 34.8 | 142   | 650.5 | 11.53   | 2.8 |
| 4/19/2018 10:18 | 0.1 | 0.3  | 5.6 | 36.2 | 150.5 | 654.9 | 12.535  | 2.6 |
| 4/19/2018 10:19 | 0.1 | -0.6 | 6   | 36.1 | 155.4 | 677.7 | 13.375  | 2.7 |
| 4/19/2018 10:20 | 0.1 | 0.8  | 6.2 | 35.5 | 151.8 | 701.2 | 14.8517 | 2.7 |
| 4/19/2018 10:21 | 0.1 | 0.2  | 5.6 | 34.6 | 148.2 | 738.7 | 15.4583 | 2.7 |
| 4/19/2018 10:22 | 0.1 | 0.2  | 4.2 | 35.9 | 155.1 | 751.3 | 16.985  | 2.7 |
| 4/19/2018 10:23 | 0.1 | 0.8  | 4.6 | 32.6 | 141.2 | 726.1 | 15.625  | 2.7 |
| 4/19/2018 10:24 | 0.1 | -0.1 | 5.4 | 31.4 | 133.7 | 671.3 | 15.43   | 2.7 |
| 4/19/2018 10:25 | 0.1 | 0.2  | 4.4 | 30.8 | 128.6 | 675.1 | 15.1    | 2.3 |
| 4/19/2018 10:26 | 0.1 | 0.2  | 6.7 | 32   | 137.9 | 685.4 | 16.6683 | 2.4 |
| 4/19/2018 10:27 | 0.1 | -0.4 | 5.3 | 30.1 | 128.7 | 692.1 | 15.7633 | 2.3 |
| 4/19/2018 10:28 | 0.1 | 0.2  | 4.7 | 29.6 | 124.3 | 633.2 | 14.8967 | 2.2 |
| 4/19/2018 10:29 | 0.1 | 0.2  | 4.9 | 29.8 | 124.4 | 628.1 | 15.9917 | 2.3 |
| 4/19/2018 10:30 | 0.1 | 0.4  | 5.3 | 33.6 | 146.9 | 669.4 | 18.4583 | 2.3 |
| 4/19/2018 10:31 | 0.1 | 1    | 6.1 | 33.9 | 151.5 | 757.3 | 19.7067 | 2.4 |
| 4/19/2018 10:32 | 0.1 | 0.6  | 5.6 | 33   | 148.4 | 752.5 | 19.4383 | 2.5 |
| 4/19/2018 10:33 | 0.1 | 0.3  | 4.5 | 33   | 148.5 | 754   | 19.5017 | 2.5 |
| 4/19/2018 10:34 | 0.1 | 0.4  | 6.1 | 32.5 | 147.7 | 754.6 | 19.575  | 2.5 |
| 4/19/2018 10:35 | 0.1 | 0.3  | 6.7 | 31.9 | 143   | 752.5 | 19.2167 | 2.5 |
| 4/19/2018 10:36 | 0.1 | 0.8  | 5.8 | 31.5 | 142.4 | 749.8 | 19.3183 | 2.6 |
| 4/19/2018 10:37 | 0.1 | -0.1 | 5.2 | 30.5 | 138.8 | 741   | 18.9383 | 2.6 |
| 4/19/2018 10:38 | 0.1 | 0.1  | 5.5 | 29.7 | 133.4 | 700.8 | 18.4033 | 2.6 |
| 4/19/2018 10:39 | 0.1 | 0.2  | 5.2 | 29.5 | 131.4 | 687.3 | 18.3    | 2.6 |
| 4/19/2018 10:40 | 0.2 | 0.3  | 5.1 | 28.9 | 126.7 | 689   | 18.05   | 2.6 |
| 4/19/2018 10:41 | 0.2 | 0.1  | 4.8 | 28.7 | 128.6 | 677.4 | 18.07   | 2.6 |
| 4/19/2018 10:42 | 0.1 | 0.7  | 4.9 | 27.4 | 117.4 | 651.4 | 17.05   | 2.6 |
| 4/19/2018 10:43 | 0.2 | 0.3  | 4.6 | 27.8 | 122.1 | 638.3 | 17.395  | 2.6 |
| 4/19/2018 10:44 | 0.2 | 0.5  | 5   | 27.4 | 120.3 | 659.7 | 17.31   | 2.7 |
| 4/19/2018 10:45 | 0.2 | 0.2  | 5.1 | 27.1 | 115.4 | 644.3 | 17.0367 | 2.6 |
| 4/19/2018 10:46 | 0.3 | 1.2  | 5.4 | 27.4 | 118.2 | 637   | 17.36   | 2.7 |
| 4/19/2018 10:47 | 0.3 | 0.2  | 5.2 | 26   | 111.1 | 635.9 | 16.745  | 2.6 |
| 4/19/2018 10:48 | 0.2 | 0.4  | 4.8 | 26.3 | 111.5 | 617   | 16.365  | 2.6 |
| 4/19/2018 10:49 | 0.2 | 0.2  | 4.6 | 25.7 | 108.5 | 620.9 | 16.3633 | 2.6 |
| 4/19/2018 10:50 | 0.2 | 0.2  | 4.1 | 25.1 | 101.4 | 608.6 | 15.6567 | 2.6 |
| 4/19/2018 10:51 | 0.2 | 0.8  | 6   | 25.3 | 103.1 | 588.4 | 15.6967 | 2.6 |
| 4/19/2018 10:52 | 0.2 | 0.3  | 4.2 | 24.3 | 99.5  | 588.1 | 15.3883 | 2.6 |
| 4/19/2018 10:53 | 0.2 | 0.2  | 4.9 | 24.6 | 98.8  | 578.6 | 15.2617 | 2.7 |
| 4/19/2018 10:54 | 0.2 | 0.3  | 5.7 | 25.4 | 105.1 | 562.7 | 15.87   | 2.7 |
| 4/19/2018 10:55 | 0.1 | 0.6  | 5   | 25.2 | 104.4 | 594.5 | 16.29   | 2.6 |
| 4/19/2018 10:56 | 0.1 | 0    | 4.9 | 25   | 101.4 | 581   | 15.9067 | 2.6 |
| 4/19/2018 10:57 | 0.1 | 0.4  | 5.1 | 24.8 | 99.1  | 573.5 | 15.805  | 2.6 |
| 4/19/2018 10:58 | 0.1 | 0.2  | 5.4 | 24.9 | 101.1 | 577.1 | 16.105  | 2   |
| 4/19/2018 10:59 | 0.1 | 0.6  | 5.8 | 23.4 | 93.8  | 558.8 | 15.1733 | 1.9 |

|                 |     |      |     |      |      |       |         |     |
|-----------------|-----|------|-----|------|------|-------|---------|-----|
| 4/19/2018 11:00 | 0.1 | 0.9  | 5.5 | 23.9 | 93.1 | 540.4 | 14.8267 | 2   |
| 4/19/2018 11:01 | 0.1 | 0.6  | 5.2 | 24.5 | 94.7 | 541.5 | 15.4583 | 2.1 |
| 4/19/2018 11:02 | 0.1 | 0.5  | 4.1 | 23.9 | 94.8 | 557.5 | 15.3683 | 2.2 |
| 4/19/2018 11:03 | 0.1 | 0.4  | 4.6 | 23.3 | 90.1 | 549.9 | 14.6683 | 2.3 |
| 4/19/2018 11:04 | 0.1 | 0.5  | 5.3 | 24.1 | 92.9 | 537.8 | 14.9733 | 2.3 |
| 4/19/2018 11:05 | 0   | 0    | 5.3 | 23.2 | 90.4 | 545.1 | 14.7483 | 2.3 |
| 4/19/2018 11:06 | 0.1 | 0.7  | 4.6 | 23.3 | 88   | 530.7 | 14.57   | 2.2 |
| 4/19/2018 11:07 | 0.1 | 0.1  | 4.8 | 22.2 | 80.5 | 492   | 13.29   | 2.3 |
| 4/19/2018 11:08 | 0.1 | 0.2  | 5.4 | 22.4 | 80.3 | 497.8 | 13.3533 | 2.3 |
| 4/19/2018 11:09 | 0.1 | 0.6  | 5.4 | 22   | 76.3 | 476.8 | 13.1317 | 2.3 |
| 4/19/2018 11:10 | 0.1 | 0.7  | 4.9 | 21.9 | 75.1 | 445.9 | 12.7083 | 2.2 |
| 4/19/2018 11:11 | 0.1 | 0.1  | 4.1 | 21.5 | 74.6 | 437.9 | 12.8067 | 2.3 |
| 4/19/2018 11:12 | 0.2 | -0.6 | 3.2 | 20.9 | 71   | 417.4 | 12.0533 | 2.3 |
| 4/19/2018 11:13 | 0.2 | 0.7  | 3.9 | 21.1 | 69   | 418.5 | 11.9067 | 2.2 |
| 4/19/2018 11:14 | 0.2 | 0.4  | 4.4 | 20.8 | 69   | 414.8 | 11.8383 | 2.3 |
| 4/19/2018 11:15 | 0.2 | 0.2  | 4.6 | 21.1 | 69.7 | 409.9 | 12.05   | 2.4 |
| 4/19/2018 11:16 | 0.2 | 0.4  | 2.9 | 22.4 | 73.4 | 452.3 | 12.87   | 2.5 |
| 4/19/2018 11:17 | 0.2 | -0.1 | 3.2 | 22.5 | 77.1 | 485.5 | 13.56   | 2.4 |
| 4/19/2018 11:18 | 0.2 | 0.3  |     | 22.5 | 78.9 | 494.8 | 14.0067 | 2.4 |
| 4/19/2018 11:19 | 0.2 | 0.9  | 2.9 | 22.7 | 78.9 | 495.6 | 14.0317 | 2.3 |
| 4/19/2018 11:20 | 0.2 | 1    | 5.4 | 22.4 | 76.4 | 486.9 | 13.5983 | 2.3 |
| 4/19/2018 11:21 | 0.1 | 0    |     | 21.9 | 74.7 | 486.1 | 13.45   | 2.3 |
| 4/19/2018 11:22 | 0.1 | 0.3  |     | 21.5 | 73.7 | 478.7 | 13.26   | 2.5 |
| 4/19/2018 11:23 | 0.1 | 0.7  |     | 21.6 | 71.9 | 464.9 | 12.8317 | 2.5 |
| 4/19/2018 11:24 | 0.1 | 0.1  | 4.9 | 21.7 | 71.2 | 449.7 | 12.67   | 2.5 |
| 4/19/2018 11:25 | 0.1 | 0.3  | 5.1 | 21.5 | 70.7 | 452.2 | 12.7417 | 2.5 |
| 4/19/2018 11:26 | 0.1 | 1    | 4   | 21.4 | 69.5 | 449.9 | 12.5967 | 2.5 |
| 4/19/2018 11:27 | 0.1 | 0.8  | 5.1 | 19.7 | 62.8 | 418.2 | 10.9668 | 2.5 |
| 4/19/2018 11:28 | 0.3 | 0.6  | 4   | 19.3 | 53.5 | 340.9 | 8.4825  | 2.6 |
| 4/19/2018 11:29 | 0.3 | 0.7  | 4.2 | 17.8 | 60.4 | 330.1 | 8.92    | 2.4 |
| 4/19/2018 11:30 | 0.4 | 0.9  | 2.5 | 16.3 | 60.4 | 239.4 | 5.6567  | 2.3 |
| 4/19/2018 11:31 | 0.3 | 0.7  | 3.7 | 16.4 | 34.8 | 144.6 | 4.379   | 2.3 |
| 4/19/2018 11:32 | 0.3 | 0.7  | 4.3 | 16.6 | 34.8 | 141.8 | 4.5267  | 2.5 |
| 4/19/2018 11:33 | 0.4 | 1    | 2.9 | 16.6 | 34.1 | 140.3 | 4.3748  | 2.4 |
| 4/19/2018 11:34 | 0.4 | 1.4  | 3.4 | 16.2 | 32.5 | 117.1 | 3.8478  | 2.3 |
| 4/19/2018 11:35 | 0.5 | 0.9  | 3.2 | 16   | 31.3 | 102.1 | 3.4608  | 2.3 |
| 4/19/2018 11:36 | 0.5 | 0.6  | 2.5 | 16.6 | 31.3 | 108.4 | 3.6335  | 2.3 |
| 4/19/2018 11:37 | 0.5 | 0.7  | 4.3 | 16.4 | 31.5 | 113.1 | 3.7238  | 2.3 |
| 4/19/2018 11:38 | 0.5 | 1.1  | 2.2 | 16.5 | 30.8 | 104   | 3.466   | 2.4 |
| 4/19/2018 11:39 | 0.6 | 1.6  | 5.2 | 16.5 | 29.5 | 92.8  | 2.9438  | 2.4 |
| 4/19/2018 11:40 | 0.7 | 1.4  | 3.1 | 16.6 | 29.6 | 90.5  | 3.052   | 2.3 |
| 4/19/2018 11:41 | 0.8 | 1.1  | 4.2 | 16.5 | 29.5 | 91.5  | 3.0602  | 2.4 |
| 4/19/2018 11:42 | 0.7 | 1.6  | 2.8 | 16.7 | 29.1 | 86.4  | 2.9923  | 2.4 |
| 4/19/2018 11:43 | 0.8 | 0.6  | 3.5 | 16.5 | 28.2 | 76.8  | 2.5927  | 2.5 |
| 4/19/2018 11:44 | 0.8 | 1.5  | 3.4 | 16.5 | 28.3 | 76.3  | 2.7055  | 2.4 |
| 4/19/2018 11:45 | 0.9 | 0.9  | 4.9 | 16.5 | 28.1 | 74    | 2.5965  | 2.5 |
| 4/19/2018 11:46 | 0.9 | 1.4  | 2   | 16.6 | 27.7 | 69.7  | 2.4977  | 2.3 |

|                 |     |     |      |      |      |      |        |     |
|-----------------|-----|-----|------|------|------|------|--------|-----|
| 4/19/2018 11:47 | 1   | 1.2 | 1.2  | 16.9 | 27.4 | 70.4 | 2.3578 | 2.2 |
| 4/19/2018 11:48 | 1   | 0.6 | 4    | 16.7 | 27.3 | 70   | 2.4355 | 2.3 |
| 4/19/2018 11:49 | 1.1 | 1.4 | 3.5  | 16.9 | 27   | 68.9 | 2.2592 | 2.4 |
| 4/19/2018 11:50 | 1.1 | 0.5 | 3.6  | 16.7 | 26.4 | 58   | 2.0895 | 2.2 |
| 4/19/2018 11:51 | 1.1 | 1.6 | 3.2  | 16.8 | 26.5 | 56.8 | 2.1237 | 2.3 |
| 4/19/2018 11:52 | 1.2 | 0.9 | 3.7  | 16.5 | 26.1 | 50.9 | 1.9368 | 2.3 |
| 4/19/2018 11:53 | 1.3 | 1.4 | 2.9  | 16.9 | 25.9 | 50.2 | 1.925  | 2.4 |
| 4/19/2018 11:54 | 1.3 | 1.6 | 2.5  | 17.2 | 25.8 | 49   | 1.8753 | 2.5 |
| 4/19/2018 11:55 | 1.4 | 2.1 | 2.4  | 16.9 | 25.4 | 48.5 | 1.7437 | 2.5 |
| 4/19/2018 11:56 | 1.4 | 2.6 | 3.5  | 16.7 | 25.3 | 47.8 | 1.7541 | 2.5 |
| 4/19/2018 11:57 | 1.5 | 2.3 | 2.5  | 17.1 | 25.3 | 47.3 | 1.7515 | 2.5 |
| 4/19/2018 11:58 | 1.5 | 1.5 | 3.9  | 17.2 | 25.3 | 47   | 1.8003 | 2.2 |
| 4/19/2018 11:59 | 1.7 | 1.8 | 2.9  | 17.4 | 25.2 | 46.5 | 1.7582 | 2.2 |
| 4/19/2018 12:00 | 1.7 | 2.1 | 3    | 17.5 | 24.7 | 45.6 | 1.6921 | 2.3 |
| 4/19/2018 12:01 | 1.8 | 2   | 3.2  | 17.8 | 24.4 | 44.5 | 1.5655 | 2.4 |
| 4/19/2018 12:02 | 1.9 | 2   | 2.6  | 17.5 | 24.1 | 42.7 | 1.4773 | 2.5 |
| 4/19/2018 12:03 | 2   | 2.6 | 3.9  | 17.7 | 23.9 | 41.3 | 1.5068 | 2.5 |
| 4/19/2018 12:04 | 2.1 | 2.1 | 3.5  | 17.4 | 23.9 | 40.5 | 1.4578 | 1.7 |
| 4/19/2018 12:05 | 2.1 | 2.4 | 2.6  | 17.6 | 23.5 | 39   | 1.4176 | 1.6 |
| 4/19/2018 12:06 | 2.2 | 2.8 | 4.1  | 18.1 | 23.2 | 37.1 | 1.3559 | 1.6 |
| 4/19/2018 12:07 | 2.4 | 2.7 | 3.2  | 18.1 | 22.8 | 34.9 | 1.3148 | 1.5 |
| 4/19/2018 12:08 | 2.6 | 2.8 | 3.4  | 18.5 | 22.8 | 33.5 | 1.3488 | 1.4 |
| 4/19/2018 12:09 | 2.6 | 2.7 | 5.3  | 18.5 | 22.2 | 31.8 | 1.2187 | 1.4 |
| 4/19/2018 12:10 | 2.7 | 3.2 | 4.9  | 18.3 | 21.9 | 30.3 | 1.1956 | 1.5 |
| 4/19/2018 12:11 | 2.7 | 2.4 | 4.3  | 18.4 | 21.9 | 29.3 | 1.1677 | 1.6 |
| 4/19/2018 12:12 | 2.7 | 2.9 | 3.3  | 18.5 | 21.8 | 27.8 | 1.133  | 1.7 |
| 4/19/2018 12:13 | 2.7 | 3.8 | 4.4  | 18.5 | 21.5 | 26.2 | 1.086  | 1.7 |
| 4/19/2018 12:14 | 2.8 | 3.4 | 5.1  | 18.8 | 21   | 24.8 | 1.0604 | 1.6 |
| 4/19/2018 12:15 | 3.2 | 4   | 4.4  | 19.5 | 20   | 23.8 | 0.957  | 1.8 |
| 4/19/2018 12:16 | 3.4 | 4   | 3.3  | 19   | 20   | 22.2 | 0.9602 | 1.8 |
| 4/19/2018 12:17 | 3.5 | 3.9 | 2.2  | 19   | 19.9 | 20.8 | 0.9199 | 1.9 |
| 4/19/2018 12:18 | 3.5 | 4.1 | 2.8  | 19.3 | 19.3 | 19.9 | 0.9092 | 2   |
| 4/19/2018 12:19 | 3.5 | 3.7 | 7.4  | 27.7 | 19.6 | 18.9 | 0.9325 | 2   |
| 4/19/2018 12:20 | 4   | 6   | 6.8  | 17.3 | 18.5 | 17.4 | 0.7911 | 1.9 |
| 4/19/2018 12:21 | 4.5 | 4.8 | 7.9  | 19.3 | 18.8 | 16.3 | 0.7832 | 1.9 |
| 4/19/2018 12:22 | 5.1 | 6   | 8.1  | 22.1 | 18.1 | 15.1 | 0.7299 | 1.9 |
| 4/19/2018 12:23 | 5.7 | 8.1 | 8.6  | 23.7 | 17   | 13.9 | 0.6707 | 2   |
| 4/19/2018 12:24 | 6.4 | 7.1 | 8.1  | 23.1 | 17.3 | 12.8 | 0.6445 | 1.9 |
| 4/19/2018 12:25 | 6.7 | 6.1 | 8    | 22.9 | 19.1 | 11.8 | 0.6835 | 1.8 |
| 4/19/2018 12:26 | 6.3 | 5.6 | 7    | 21.9 | 20   | 10.7 | 0.6897 | 1.6 |
| 4/19/2018 12:27 | 5.4 | 5.3 | 7.6  | 21.6 | 20.7 | 9.4  | 0.7034 | 1.6 |
| 4/19/2018 12:28 | 4.7 | 4.2 | 6.5  | 21.1 | 21.7 | 8.6  | 0.7321 | 1.5 |
| 4/19/2018 12:29 | 3.8 | 3.3 | 8.7  | 22.7 | 25.4 | 16.5 | 0.7665 | 1.6 |
| 4/19/2018 12:30 | 2.8 | 2.3 | 11.3 | 23.9 | 27.6 | 33   | 0.8517 | 1.8 |
| 4/19/2018 12:31 | 1.7 | 1.4 | 11.8 | 26   | 27.6 | 43.7 | 0.9949 | 1.8 |
| 4/19/2018 12:32 | 0.9 | 2.2 | 12.8 | 28.4 | 39.6 | 47.9 | 1.1763 | 1.7 |
| 4/19/2018 12:33 | 0.5 | 1.4 | 13.1 | 30.6 | 41.9 | 52.4 | 1.3751 | 1.9 |

|                 |     |     |      |      |      |      |        |     |
|-----------------|-----|-----|------|------|------|------|--------|-----|
| 4/19/2018 12:34 | 0.3 | 2.1 | 14.6 | 33.5 | 43.7 | 55   | 1.5981 | 1.8 |
| 4/19/2018 12:35 | 0.2 | 2.6 | 16.2 | 38.7 | 44.3 | 55.2 | 1.9373 | 2   |
| 4/19/2018 12:36 | 0.2 | 2.2 | 16.5 | 40.2 | 43.8 | 55.4 | 2.2228 | 2.2 |
| 4/19/2018 12:37 | 0.2 | 1.5 | 15.4 | 38.8 | 43.1 | 55.6 | 2.2835 | 2   |
| 4/19/2018 12:38 | 0.3 | 2.3 | 15.5 | 38.6 | 42.9 | 55.9 | 2.4848 | 2   |
| 4/19/2018 12:39 | 0.3 | 1.9 | 15.8 | 37   | 41.7 | 55.9 | 2.4107 | 2.1 |
| 4/19/2018 12:40 | 0.3 | 2   | 13.5 | 36.4 | 40.9 | 55.8 | 2.4182 | 2.1 |
| 4/19/2018 12:41 | 0.3 | 1.6 | 14.3 | 36.6 | 40.8 | 55.8 | 2.4894 | 2   |
| 4/19/2018 12:42 | 0.4 | 1.6 | 13   | 35.1 | 39.6 | 55.5 | 2.4153 | 2.1 |
| 4/19/2018 12:43 | 0.4 | 1.6 | 13.7 | 35.2 | 39.1 | 55.2 | 2.4402 | 2.2 |
| 4/19/2018 12:44 | 0.4 | 1.8 | 13.3 | 34.2 | 38.5 | 54.6 | 2.4643 | 2.2 |
| 4/19/2018 12:45 | 0.4 | 1.6 | 13.5 | 32.9 | 37.1 | 53.8 | 2.3584 | 2.3 |
| 4/19/2018 12:46 | 0.4 | 1.3 | 13.1 | 33.3 | 37.6 | 53.1 | 2.4767 | 2.2 |
| 4/19/2018 12:47 | 0.4 | 1.5 | 12.5 | 32.5 | 36.7 | 52.3 | 2.3996 | 2.1 |
| 4/19/2018 12:48 | 0.4 | 2.3 | 12.8 | 32.9 | 35.9 | 51.6 | 2.3799 | 2.1 |
| 4/19/2018 12:49 | 0.4 | 1.2 | 12.2 | 31.8 | 36.6 | 51.2 | 2.46   | 2.1 |
| 4/19/2018 12:50 | 0.5 | 1.3 | 11   | 30.4 | 34.2 | 50.3 | 2.2593 | 2.2 |
| 4/19/2018 12:51 | 0.4 | 2.1 | 11.8 | 31.2 | 34.6 | 49.7 | 2.37   | 2.1 |
| 4/19/2018 12:52 | 0.5 | 1.5 | 11.8 | 31   | 35.2 | 49.2 | 2.4116 | 2.1 |
| 4/19/2018 12:53 | 0.3 | 1.4 | 12.8 | 30.4 | 34.8 | 49   | 2.3996 | 2.1 |
| 4/19/2018 12:54 | 0.3 | 1.5 | 11.9 | 29.5 | 34.2 | 48.7 | 2.3511 | 2.1 |
| 4/19/2018 12:55 | 0.3 | 1.8 | 12.2 | 29.7 | 33   | 48.1 | 2.2815 | 2.1 |
| 4/19/2018 12:56 | 0.4 | 1.6 | 12.4 | 29.2 | 32.6 | 47.6 | 2.28   | 2.3 |
| 4/19/2018 12:57 | 0.4 | 1.6 | 10   | 29.3 | 32.7 | 47.1 | 2.2945 | 2.2 |
| 4/19/2018 12:58 | 0.4 | 1.2 | 11.6 | 28.9 | 32.1 | 46.6 | 2.2656 | 1.9 |
| 4/19/2018 12:59 | 0.4 | 1.5 | 10.5 | 28.5 | 31.9 | 46.5 | 2.2668 | 1.9 |
| 4/19/2018 13:00 | 0.4 | 2.1 | 9.9  | 27.8 | 31.2 | 45.8 | 2.2027 | 1.9 |
| 4/19/2018 13:01 | 0.5 | 1.1 | 12.2 | 27.8 | 30.6 | 45   | 2.1908 | 2   |
| 4/19/2018 13:02 | 0.5 | 1.2 | 10.2 | 27.7 | 30.5 | 44.5 | 2.186  | 2.2 |
| 4/19/2018 13:03 | 0.5 | 2.2 | 10.8 | 26.8 | 29.9 | 43.8 | 2.134  | 2.2 |
| 4/19/2018 13:04 | 0.7 | 2.2 | 10.9 | 26.3 | 27.8 | 43   | 1.9713 | 2   |
| 4/19/2018 13:05 | 0.9 | 2.1 | 11.2 | 26.8 | 28.2 | 42.2 | 2.029  | 2   |
| 4/19/2018 13:06 | 0.8 | 1.3 | 9.7  | 27.4 | 29   | 41.7 | 2.1224 | 2.1 |
| 4/19/2018 13:07 | 0.6 | 0.9 | 11.3 | 26.6 | 29.6 | 41.2 | 2.1689 | 2   |
| 4/19/2018 13:08 | 0.5 | 1.7 | 10.9 | 26.6 | 28.7 | 40.7 | 2.0723 | 2.1 |
| 4/19/2018 13:09 | 0.4 | 1.3 | 11.7 | 26.6 | 29   | 40.5 | 2.1309 | 2.1 |
| 4/19/2018 13:10 | 0.4 | 1.3 | 10   | 26.4 | 28.7 | 40.2 | 2.1043 | 2.1 |
| 4/19/2018 13:11 | 0.4 | 1.4 | 11.1 | 26.1 | 28.2 | 39.8 | 2.0638 | 2   |
| 4/19/2018 13:12 | 0.4 | 1.7 | 10.8 | 26.1 | 27.6 | 39.7 | 2.0408 | 2   |
| 4/19/2018 13:13 | 0.5 | 1.3 | 10.1 | 25.2 | 27.9 | 39.9 | 2.052  | 2.1 |
| 4/19/2018 13:14 | 0.5 | 1.3 | 8.8  | 25.8 | 27.1 | 39.8 | 2.0343 | 1.9 |
| 4/19/2018 13:15 | 0.4 | 1.3 | 8.6  | 25.4 | 27.4 | 39.5 | 2.0226 | 2.1 |
| 4/19/2018 13:16 | 0.5 | 1.8 | 9    | 25.1 | 26.2 | 39   | 1.9147 | 2.3 |
| 4/19/2018 13:17 | 0.5 | 0.7 | 10.1 | 25.5 | 26.4 | 38.6 | 1.9733 | 2.4 |
| 4/19/2018 13:18 | 0.6 | 1.2 | 9.5  | 24.8 | 26   | 38.2 | 1.9151 | 2.4 |
| 4/19/2018 13:19 | 0.6 | 1.2 | 9    | 25   | 25.2 | 37.6 | 1.8951 | 2.4 |
| 4/19/2018 13:20 | 0.6 | 1.2 | 9.3  | 24.3 | 25.4 | 37.3 | 1.8643 | 2.3 |

|                 |      |      |      |      |      |       |        |     |
|-----------------|------|------|------|------|------|-------|--------|-----|
| 4/19/2018 13:21 | 0.7  | 1.6  | 9.7  | 24.7 | 25.3 | 36.7  | 1.9028 | 2.4 |
| 4/19/2018 13:22 | 0.6  | 1    | 9.9  | 24.4 | 24.6 | 36.2  | 1.8302 | 2.4 |
| 4/19/2018 13:23 | 0.7  | 1.2  | 8.5  | 23.8 | 24.2 | 35.5  | 1.8038 | 2.4 |
| 4/19/2018 13:24 | 0.8  | 1.8  | 8.7  | 23.9 | 23.3 | 34.7  | 1.736  | 2.4 |
| 4/19/2018 13:25 | 0.8  | 2.1  | 9.8  | 24.6 | 23.9 | 34.3  | 1.7874 | 2.5 |
| 4/19/2018 13:26 | 0.8  | 1.8  | 8.5  | 23.8 | 23.7 | 33.9  | 1.7693 | 2.3 |
| 4/19/2018 13:27 | 0.8  | 1.5  | 8    | 23   | 22.1 | 33.2  | 1.605  | 2.3 |
| 4/19/2018 13:28 | 1.1  | 2    | 7.1  | 23.5 | 21.2 | 32.2  | 1.5574 | 2.6 |
| 4/19/2018 13:29 | 1.3  | 3    | 9    | 23.1 | 21.6 | 31.6  | 1.5898 | 2.5 |
| 4/19/2018 13:30 | 1.4  | 1.9  | 7.5  | 22.9 | 21   | 30.7  | 1.5676 | 2.6 |
| 4/19/2018 13:31 | 1.2  | 2.6  | 9.3  | 22.8 | 21.3 | 29.8  | 1.5759 | 2.7 |
| 4/19/2018 13:32 | 1.3  | 1.6  | 8.1  | 22.9 | 21.3 | 29.4  | 1.5123 | 2.7 |
| 4/19/2018 13:33 | 1.3  | 2.4  | 7.1  | 22.9 | 21.1 | 28.9  | 1.569  | 2.6 |
| 4/19/2018 13:34 | 1.3  | 2.7  | 8.4  | 22.9 | 20.4 | 27.9  | 1.5227 | 2.8 |
| 4/19/2018 13:35 | 1    | 1.7  | 8.5  | 23   | 21.7 | 27.8  | 1.6902 | 2.7 |
| 4/19/2018 13:36 | 0.7  | 1.1  | 9.2  | 23   | 22.8 | 28.1  | 1.7417 | 2.5 |
| 4/19/2018 13:37 | 0.4  | 1.2  | 8.4  | 23.1 | 22.5 | 28.4  | 1.732  | 2.5 |
| 4/19/2018 13:38 | 0.3  | 1.5  | 8.5  | 22.9 | 22.3 | 28.8  | 1.7081 | 2.7 |
| 4/19/2018 13:39 | 0.3  | 1.2  | 7.5  | 22.8 | 22   | 29.1  | 1.6998 | 2.5 |
| 4/19/2018 13:40 | 0.3  | 1.3  | 7.4  | 23   | 21.9 | 29.5  | 1.6931 | 2.6 |
| 4/19/2018 13:41 | 0.3  | 1.1  | 8.1  | 22.8 | 21.5 | 29.8  | 1.6585 | 2.6 |
| 4/19/2018 13:42 | 0.4  | 1.4  | 7.6  | 22.5 | 21   | 30.1  | 1.6248 | 2.6 |
| 4/19/2018 13:43 | 0.5  | 1.1  | 7.8  | 22.6 | 20.7 | 30.1  | 1.5896 | 2.2 |
| 4/19/2018 13:44 | 0.6  | 1.3  | 8.3  | 22.3 | 20.4 | 29.8  | 1.5778 | 2   |
| 4/19/2018 13:45 | 0.6  | 0.9  | 7.8  | 22.5 | 20.4 | 29.4  | 1.576  | 2.1 |
| 4/19/2018 13:46 | 0.5  | 0.7  | 8.5  | 22.2 | 20.5 | 29.2  | 1.5984 | 2.1 |
| 4/19/2018 13:47 | 0.8  | 3.1  | 8.6  | 22.7 | 18.8 | 27.1  | 1.3906 | 2.1 |
| 4/19/2018 13:48 | 2.8  | 8.7  | 7.8  | 24.3 | 14.4 | 12.6  | 0.9063 | 2.2 |
| 4/19/2018 13:49 | 5.1  | 7.9  | 9    | 24.2 | 12.6 | 10    | 0.7819 | 2.3 |
| 4/19/2018 13:50 | 7    | 8.5  | 7.6  | 24.2 | 11.8 | 8.4   | 0.6974 | 2.3 |
| 4/19/2018 13:51 | 7.6  | 9.3  | 10   | 25   | 11.4 | 7.5   | 0.649  | 2.4 |
| 4/19/2018 13:52 | 8    | 9.4  | 8.5  | 24.8 | 11.1 | 7.4   | 0.6258 | 2.4 |
| 4/19/2018 13:53 | 8.2  | 8.8  | 8.3  | 24.5 | 11.1 | 7.3   | 0.6196 | 2.6 |
| 4/19/2018 13:54 | 8.3  | 9.2  | 8.1  | 24.6 | 10.8 | 7.1   | 0.5761 | 2.5 |
| 4/19/2018 13:55 | 8.3  | 9.9  | 8.4  | 24.8 | 10.3 | 6.8   | 0.5317 | 2.5 |
| 4/19/2018 13:56 | 8.6  | 10.6 | 8.7  | 25.6 | 10.1 | 6.5   | 0.5031 | 2.5 |
| 4/19/2018 13:57 | 9.2  | 10.7 | 8.9  | 26   | 9.6  | 6.1   | 0.4666 | 2.2 |
| 4/19/2018 13:58 | 9.8  | 11.1 | 9.7  | 26.2 | 9.4  | 5.7   | 0.4455 | 1.5 |
| 4/19/2018 13:59 | 10.3 | 10.7 | 7.5  | 26.3 | 9.5  | 5.2   | 0.4549 | 1.4 |
| 4/19/2018 14:00 | 10.3 | 10.5 | 8.7  | 25.6 | 9.6  | 4.9   | 0.466  | 1.4 |
| 4/19/2018 14:01 | 10.3 | 11.3 | 8.4  | 26.7 | 9.6  | 4.6   | 0.4267 | 1.5 |
| 4/19/2018 14:02 | 10.2 | 9.6  | 8.4  | 25.6 | 10.2 | 4.3   | 0.4778 | 1.6 |
| 4/19/2018 14:03 | 9.5  | 7.3  | 6.8  | 24.1 | 13.4 | 4.1   | 0.5893 | 1.5 |
| 4/19/2018 14:04 | 8.4  | 7.7  | 7.9  | 23.9 | 13.5 | 4     | 0.5782 | 1.5 |
| 4/19/2018 14:05 | 7.2  | 7.5  | 7.9  | 25.3 | 14.2 | 7.5   | 0.5796 | 1.5 |
| 4/19/2018 14:06 | 5.4  | 6.4  | 44   | 48.4 | 60.2 | 79    | 1.006  | 1.6 |
| 4/19/2018 14:07 | 3.3  | 6    | 69.3 | 62.9 | 95.1 | 246.5 | 2.0503 | 1.7 |

|                 |     |      |       |       |       |       |         |     |
|-----------------|-----|------|-------|-------|-------|-------|---------|-----|
| 4/19/2018 14:08 | 1.1 | 8.7  | 59.8  | 79.8  | 123.6 | 314   | 2.6665  | 1.8 |
| 4/19/2018 14:09 | 0.3 | 9.7  | 76.5  | 88.7  | 132.1 | 390.6 | 3.1437  | 2   |
| 4/19/2018 14:10 | 0.2 | 9.5  |       | 90.9  | 135   | 411   | 3.6112  | 2.2 |
| 4/19/2018 14:11 | 0.3 | 9.3  | 69.1  | 86.1  | 119.6 | 376.4 | 3.6752  | 2.3 |
| 4/19/2018 14:12 | 0.3 | 9.7  | 77    | 96.4  | 115.1 | 337.6 | 4.2588  | 2.4 |
| 4/19/2018 14:13 | 0.3 | 10   | 85.1  | 105.5 | 120.8 | 340.2 | 5.8887  | 2.6 |
| 4/19/2018 14:14 | 0.3 | 10   |       | 103.4 | 117.5 | 336.3 | 6.4965  | 2.7 |
| 4/19/2018 14:15 | 0.3 | 8.8  | 71.3  | 94.6  | 110.7 | 335.3 | 6.6445  | 2.8 |
| 4/19/2018 14:16 | 0.3 | 9.1  | 75.1  | 91.7  | 106.6 | 340.9 | 7.1158  | 2.8 |
| 4/19/2018 14:17 | 0.3 | 9.7  | 98.7  | 99.9  | 108   | 322.3 | 7.5628  | 2.8 |
| 4/19/2018 14:18 | 0.2 | 9.7  | 84.2  | 109.2 | 117.6 | 326.1 | 9.3087  | 3   |
| 4/19/2018 14:19 | 0.2 | 10.9 | 88.1  | 107.9 | 115   | 344.9 | 9.4312  | 3   |
| 4/19/2018 14:20 | 0.2 | 10.6 | 75.6  | 112.7 | 118.4 | 374.6 | 10.9133 | 3.1 |
| 4/19/2018 14:21 | 0.2 | 10   | 97.6  | 107.7 | 118.5 | 369.6 | 10.8983 | 3.1 |
| 4/19/2018 14:22 | 0.2 | 11.7 |       | 121.1 | 114.4 | 378.9 | 12.0083 | 3.1 |
| 4/19/2018 14:23 | 0.2 | 10.6 | 137   | 175   | 114.1 | 413.3 |         | 4.4 |
| 4/19/2018 14:24 | 0.2 | 10.1 | 101.3 | 119.2 | 123.5 | 423.3 | 17.325  | 3.8 |
| 4/19/2018 14:25 | 0.3 | 10.2 | 96.2  | 117.3 | 123.7 | 404.5 | 13.06   | 3.4 |
| 4/19/2018 14:26 | 0.3 | 9.8  | 95.7  | 115.1 | 122.3 | 401.3 | 12.6217 | 3.4 |
| 4/19/2018 14:27 | 0.2 | 9.6  | 93.8  | 111   | 120.9 | 395.7 | 12.4733 | 3.4 |
| 4/19/2018 14:28 | 0.2 | 9.8  | 89.5  | 106.7 | 118.1 | 393.1 | 12.2867 | 3.3 |
| 4/19/2018 14:29 | 0.1 | 9.6  | 90.8  | 106.4 | 116.7 | 392.5 | 12.455  | 3.2 |
| 4/19/2018 14:30 | 0.2 | 9    | 87.9  | 102.1 | 114.1 | 378.8 | 12.275  | 3.2 |
| 4/19/2018 14:31 | 0.2 | 8.9  | 85.8  | 100.7 | 112.1 | 376.5 | 12.3433 | 3.2 |
| 4/19/2018 14:32 | 0.2 | 9.2  | 82.3  | 96.5  | 110.4 | 364.4 | 12.035  | 3.3 |
| 4/19/2018 14:33 | 0.2 | 8.3  | 80.7  | 93.7  | 110.3 | 358.9 | 11.9333 | 3.3 |
| 4/19/2018 14:34 | 0.1 | 7.4  | 77.1  | 91.9  | 105.3 | 344.4 | 11.6217 | 3.3 |
| 4/19/2018 14:35 | 0.1 | 7.8  | 76.5  | 90.4  | 101.5 | 351.4 | 11.9383 | 3.3 |
| 4/19/2018 14:36 | 0.2 | 7.2  | 74.7  | 88.1  | 100.5 | 357.7 | 11.7183 | 3.3 |
| 4/19/2018 14:37 | 0.2 | 8    | 77    | 89.2  | 99.3  | 351.8 | 11.785  | 3.1 |
| 4/19/2018 14:38 | 0.2 | 7.2  | 74.6  | 85.4  | 98.7  | 344.3 | 11.8783 | 3.1 |
| 4/19/2018 14:39 | 0.2 | 6.9  | 71    | 82.8  | 95.1  | 336.5 | 11.6117 | 3.3 |
| 4/19/2018 14:40 | 0.2 | 6.6  | 72.2  | 81.7  | 94.6  | 335.7 | 11.5983 | 3.3 |
| 4/19/2018 14:41 | 0.2 | 6.2  | 66.2  | 75.6  | 91    | 328.5 | 11.0767 | 3.2 |
| 4/19/2018 14:42 | 0.2 | 5.9  | 66.2  | 76.6  | 86.7  | 310.7 | 10.7    | 3.3 |
| 4/19/2018 14:43 | 0.2 | 5.3  | 57.4  | 65.9  | 76.9  | 305.7 | 9.9592  | 3.3 |
| 4/19/2018 14:44 | 0.2 | 6.7  | 57.8  | 70.7  | 76.6  | 290.4 | 9.4987  | 3.3 |
| 4/19/2018 14:45 | 0.2 | 4.5  | 53.4  | 60.2  | 73    | 279.8 | 9.349   | 3.2 |
| 4/19/2018 14:46 | 0.3 | 5.2  | 54.7  | 65.1  | 72.6  | 258.2 | 9.2123  | 3.1 |
| 4/19/2018 14:47 | 0.3 | 5.6  | 56.5  | 66.1  | 73.4  | 252.7 | 9.5787  | 2.8 |
| 4/19/2018 14:48 | 0.3 | 5.1  | 52.1  | 61.5  | 72.8  | 258   | 9.5965  | 2.8 |
| 4/19/2018 14:49 | 0.3 | 5.7  | 53.9  | 63    | 70.2  | 264.4 | 10.5325 | 2.9 |
| 4/19/2018 14:50 | 0.3 | 5.5  | 57    | 67.3  | 71.7  | 277.2 | 13.0817 | 3   |
| 4/19/2018 14:51 | 0.3 | 5.5  | 59.1  | 66.8  | 76    | 287.7 | 10.65   | 3   |
| 4/19/2018 14:52 | 0.3 | 5.4  | 59.2  | 68.7  | 77.2  | 286.4 | 10.6017 | 3.1 |
| 4/19/2018 14:53 | 0.3 | 5.6  | 59.8  | 70.4  | 79.7  | 304.6 | 11.1783 | 3.1 |
| 4/19/2018 14:54 | 0.3 | 5.6  | 59.1  | 68.9  | 79.3  | 308.2 | 11.065  | 3.2 |

|                 |     |     |      |      |      |       |         |     |
|-----------------|-----|-----|------|------|------|-------|---------|-----|
| 4/19/2018 14:55 | 0.3 | 5.6 | 57.8 | 67.7 | 78.1 | 307.1 | 10.93   | 3.2 |
| 4/19/2018 14:56 | 0.3 | 5.5 | 58.1 | 66.9 | 76.8 | 305.5 | 10.8983 | 3.2 |
| 4/19/2018 14:57 | 0.3 | 4.8 | 56   | 64.9 | 74.7 | 291.1 | 10.6    | 3.2 |
| 4/19/2018 14:58 | 0.2 | 5.5 | 55.2 | 64.9 | 73.7 | 286.6 | 10.5683 | 3.2 |
| 4/19/2018 14:59 | 0.2 | 5   | 54.1 | 62.9 | 73   | 284.6 | 10.4817 | 3.1 |
| 4/19/2018 15:00 | 0.2 | 4.5 | 50.9 | 62.1 | 71.2 | 279.4 | 10.2492 | 3   |
| 4/19/2018 15:01 | 0.2 | 4.9 | 51.3 | 61.8 | 69.8 | 277.5 | 10.11   | 3   |
| 4/19/2018 15:02 | 0.2 | 4.3 | 53   | 60   | 69.5 | 279.2 | 10.1605 | 2.4 |
| 4/19/2018 15:03 | 0.2 | 4.5 | 51.2 | 59.5 | 68.6 | 277.3 | 10.1125 | 2.3 |
| 4/19/2018 15:04 | 0.2 | 4   | 49.5 | 58.5 | 67.5 | 272.9 | 10.001  | 2.4 |
| 4/19/2018 15:05 | 0.2 | 4.5 | 45.4 | 54.7 | 64.2 | 263.5 | 9.4147  | 2.4 |
| 4/19/2018 15:06 | 0.2 | 4.8 | 48   | 57.8 | 64.4 | 263.8 | 9.6218  | 2.5 |
| 4/19/2018 15:07 | 0.1 | 3.5 | 41.9 | 48.3 | 61.3 | 255.3 | 8.9272  | 2.5 |
| 4/19/2018 15:08 | 0.2 | 3.7 | 39.7 | 49.7 | 56.1 | 235.1 | 8.1795  | 2.5 |
| 4/19/2018 15:09 | 0.2 | 3.3 | 40   | 48.7 | 56.1 | 229.5 | 8.2732  | 2.6 |
| 4/19/2018 15:10 | 0.2 | 3.3 | 38.6 | 48.9 | 53.6 | 222.8 | 8.0812  | 2.7 |
| 4/19/2018 15:11 | 0.2 | 3.6 | 36.1 | 44   | 51.5 | 215.1 | 7.6047  | 2.7 |
| 4/19/2018 15:12 | 0.2 | 3.2 | 38.1 | 45.7 | 50.7 | 194.7 | 7.6095  | 2.8 |
| 4/19/2018 15:13 | 0.3 | 4.6 | 41.3 | 50   | 53.4 | 210.3 | 8.2177  | 2.8 |
| 4/19/2018 15:14 | 0.2 | 3.6 | 39.4 | 47.7 | 54.1 | 219.5 | 8.407   | 2.8 |
| 4/19/2018 15:15 | 0.2 | 3.5 | 38.2 | 46.8 | 53   | 226.2 | 8.5575  | 2.8 |
| 4/19/2018 15:16 | 0.3 | 3.7 | 38.1 | 47.4 | 51.1 | 212.6 | 8.1747  | 2.8 |
| 4/19/2018 15:17 | 0.3 | 4.3 | 39.3 | 49.4 | 52   | 220   | 8.6577  | 2.9 |
| 4/19/2018 15:18 | 0.3 | 3   | 39.7 | 48.8 | 53   | 226.2 | 8.5082  | 3   |
| 4/19/2018 15:19 | 0.2 | 3.9 | 39.2 | 50.6 | 54.9 | 233.9 | 8.7493  | 3   |
| 4/19/2018 15:20 | 0.2 | 3.2 | 40.1 | 49.9 | 55.7 | 238   | 8.9063  | 2.8 |
| 4/19/2018 15:21 | 0.2 | 3.8 | 39.3 | 49.4 | 55.1 | 237.8 | 8.8445  | 2.3 |
| 4/19/2018 15:22 | 0.2 | 3   | 39   | 48.7 | 54.1 | 237.2 | 8.6798  | 2.4 |
| 4/19/2018 15:23 | 0.2 | 3.3 | 39.1 | 47.9 | 53.2 | 236.4 | 8.592   | 2.5 |
| 4/19/2018 15:24 | 0.2 | 3.3 | 36.9 | 47.3 | 52.4 | 234.9 | 8.4888  | 2.5 |
| 4/19/2018 15:25 | 0.2 | 3.2 | 37.7 | 47   | 51.9 | 233.4 | 8.4893  | 2.7 |
| 4/19/2018 15:26 | 0.2 | 3.5 | 36.3 | 45.8 | 51   | 231.9 | 8.3488  | 2.9 |
| 4/19/2018 15:27 | 0.2 | 2.9 | 35.4 | 44.4 | 49.3 | 218.2 | 8.0788  | 2.9 |
| 4/19/2018 15:28 | 0.2 | 2.7 | 34.3 | 44.8 | 37.4 | 206.7 | 8.073   | 2.6 |
| 4/19/2018 15:29 | 0.2 | 2.7 | 34.1 | 43.1 | 7.4  | 84    | 7.985   | 2   |
| 4/19/2018 15:30 | 0.3 | 3   | 34.1 | 43.7 | 0.1  | 0.2   | 7.8168  | 1.9 |
| 4/19/2018 15:31 | 0.3 | 2.9 | 33.1 | 42.1 | -0.3 | 0.1   | 7.7517  | 1.9 |
| 4/19/2018 15:32 | 0.3 | 2.1 | 24.7 | 31.8 | -0.3 | 0.1   | 6.7175  | 1.8 |
| 4/19/2018 15:33 | 0.7 | 4.6 | 19.6 | 29.3 | -0.3 | 0.1   | 4.1258  | 1.7 |
| 4/19/2018 15:34 | 1.3 | 3.6 | 16.5 | 26.4 | -0.3 | 0.1   | 3.5428  | 1.6 |
| 4/19/2018 15:35 | 1.8 | 4   | 15.1 | 26.4 | -0.3 | 0.1   | 3.0597  | 1.6 |
| 4/19/2018 15:36 | 2   | 3.9 | 13.9 | 25.7 | -0.2 | 0.1   | 2.9478  | 1.6 |
| 4/19/2018 15:37 | 2.1 | 4.5 | 14.5 | 26.1 | 0    | 0     | 2.909   | 1.6 |
| 4/19/2018 15:38 | 2.2 | 4.8 | 13.5 | 25.3 | 0.1  | 0     | 2.6668  | 1.6 |
| 4/19/2018 15:39 | 2.3 | 4.1 | 15.6 | 26.4 | 0.9  | 73.4  | 2.7785  | 1.6 |
| 4/19/2018 15:40 | 2.3 | 4.6 | 11.7 | 24.4 | 0.3  | 109.2 | 2.4987  | 1.6 |
| 4/19/2018 15:41 | 2.3 | 3.7 | 12   | 24.2 | 1.1  | 105.5 | 2.4903  | 1.6 |



|                 |      |      |      |      |       |       |        |     |
|-----------------|------|------|------|------|-------|-------|--------|-----|
| 4/19/2018 15:42 | 2.5  | 4.4  | 11.4 | 23.7 | 1.9   | 104.3 | 2.1423 | 1.5 |
| 4/19/2018 15:43 | 2.6  | 4.8  | 10.9 | 23.7 | 2.5   | 104.2 | 2.0747 | 1.5 |
| 4/19/2018 15:44 | 2.7  | 4.3  | 11.6 | 23.5 | 2.8   | 103.9 | 2.0485 | 1.5 |
| 4/19/2018 15:45 | 2.6  | 4.3  | 10.3 | 22.9 | 2.9   | 103.7 | 1.9762 | 1.5 |
| 4/19/2018 15:46 | 2.8  | 4.9  | 9.1  | 22.9 | 3     | 103.5 | 1.6705 | 1.5 |
| 4/19/2018 15:47 | 3.2  | 4.9  | 10.2 | 22.7 | 2.9   | 103.3 | 1.538  | 1.5 |
| 4/19/2018 15:48 | 3.4  | 5    | 8.7  | 22.3 | 2.8   | 102.3 | 1.4805 | 1.5 |
| 4/19/2018 15:49 | 3.5  | 5.5  | 7.5  | 22.4 | 2.7   | 100.7 | 1.369  | 1.5 |
| 4/19/2018 15:50 | 3.5  | 5.5  | 9.3  | 22.4 | 6.6   | 62.6  | 1.3482 | 1.5 |
| 4/19/2018 15:51 | 3.7  | 4.9  | 7    | 22.2 | 37.3  | 19.6  | 1.2152 | 1.4 |
| 4/19/2018 15:52 | 3.9  | 6.1  | 8.1  | 22.6 | 52.5  | 26.9  | 1.2    | 1.5 |
| 4/19/2018 15:53 | 4.1  | 6.6  | 8.6  | 22.8 | 65.4  | 29.7  | 1.1165 | 1.5 |
| 4/19/2018 15:54 | 4.1  | 5.3  | 5.9  | 21.8 | 72.3  | 32.2  | 1.193  | 1.5 |
| 4/19/2018 15:55 | 4.2  | 5.9  | 8    | 22.2 | 74.9  | 33.4  | 1.076  | 1.5 |
| 4/19/2018 15:56 | 4.3  | 6    | 8.1  | 22.4 | 75.5  | 33.5  | 1.0548 | 1.5 |
| 4/19/2018 15:57 | 4.6  | 7    | 7    | 22.7 | 75.5  | 33.6  | 0.9218 | 1.5 |
| 4/19/2018 15:58 | 5.1  | 7.5  | 7.8  | 22.7 | 75.5  | 33.6  | 0.8461 | 1.5 |
| 4/19/2018 15:59 | 5.4  | 7.2  | 8.8  | 22.9 | 75.5  | 33.7  | 0.8512 | 1.5 |
| 4/19/2018 16:00 | 5.5  | 6.4  | 7.8  | 22.9 | 75.5  | 33.7  | 0.8718 | 1.5 |
| 4/19/2018 16:01 | 5.5  | 7.2  | 7.7  | 23   | 75.9  | 33.7  | 0.7989 | 1.5 |
| 4/19/2018 16:02 | 5.5  | 6.3  | 5.7  | 22.5 | 76.6  | 33.6  | 0.791  | 1.5 |
| 4/19/2018 16:03 | 5.3  | 5.7  | 8    | 22.1 | 76.9  | 33.5  | 0.9063 | 1.5 |
| 4/19/2018 16:04 | 5.2  | 7.1  | 6.9  | 22.7 | 67.2  | 33.4  | 0.744  | 1.5 |
| 4/19/2018 16:05 | 5.5  | 8.2  | 7.9  | 23.1 | 196.8 | 28.6  | 0.6636 | 1.5 |
| 4/19/2018 16:06 | 6.2  | 8.5  | 7    | 23.6 | 0.1   | 1.5   | 0.6158 | 1.5 |
| 4/19/2018 16:07 | 6.7  | 8.7  | 7.4  | 23.8 | -0.1  | 0     | 0.5762 | 1.6 |
| 4/19/2018 16:08 | 7.1  | 9.1  | 5.9  | 24   | -0.1  | 0     | 0.5429 | 1.5 |
| 4/19/2018 16:09 | 7.3  | 8.2  | 6.8  | 24   | -0.1  | -0.1  | 0.5635 | 1.5 |
| 4/19/2018 16:10 | 7.3  | 7.8  | 8.4  | 23.9 | -0.1  | -0.1  | 0.5434 | 1.6 |
| 4/19/2018 16:11 | 7.2  | 9    | 6.6  | 24.1 | -0.1  | -0.1  | 0.512  | 1.6 |
| 4/19/2018 16:12 | 7    | 8.7  | 5.9  | 23.6 | 0     | 4.9   | 0.5665 | 1.5 |
| 4/19/2018 16:13 | 6.8  | 7.9  | 5.5  | 23.5 | 0.4   | 87.6  | 0.5351 | 1.9 |
| 4/19/2018 16:14 | 6.9  | 9.1  | 7.1  | 23.7 | 0.2   | 102.4 | 0.4996 | 2.5 |
| 4/19/2018 16:15 | 7    | 8.9  | 8    | 23.9 | 0.3   | 102.4 | 0.5019 | 1.7 |
| 4/19/2018 16:16 | 7.2  | 8.9  | 7.1  | 24.1 | 0.4   | 102.7 | 0.4801 | 1.7 |
| 4/19/2018 16:17 | 7.5  | 9.8  | 6.7  | 24.6 | 0.4   | 102.8 | 0.4266 | 2.1 |
| 4/19/2018 16:18 | 7.9  | 9.9  | 6.9  | 24.6 | 0.4   | 102.7 | 0.4045 | 3.9 |
| 4/19/2018 16:19 | 8.3  | 10.5 | 8.4  | 24.9 | 0.4   | 102.7 | 0.3846 | 4.8 |
| 4/19/2018 16:20 | 8.6  | 10.5 | 8.1  | 25.1 | 0.3   | 101.6 | 0.3736 | 2.3 |
| 4/19/2018 16:21 | 8.9  | 11.7 | 8.4  | 25.9 | 6.3   | 63.6  | 0.3365 | 2   |
| 4/19/2018 16:22 | 9.6  | 12.3 | 7.7  | 26.8 | 30.9  | 12.9  | 0.3104 | 2   |
| 4/19/2018 16:23 | 10.2 | 12.2 | 8.8  | 26.7 | 48.8  | 22.7  | 0.3076 | 1.9 |
| 4/19/2018 16:24 | 10.7 | 13.2 | 7.7  | 27.7 | 57    | 27.1  | 0.2821 | 1.9 |
| 4/19/2018 16:25 | 11.1 | 13.3 | 8.2  | 28.1 | 63.4  | 28.7  | 0.2788 | 1.8 |
| 4/19/2018 16:26 | 11.6 | 13.9 | 8.4  | 28.4 | 66.2  | 29.2  | 0.2407 | 1.7 |
| 4/19/2018 16:27 | 12.1 | 15   | 8.9  | 28.4 | 67.1  | 29.2  | 0.2361 | 1.6 |
| 4/19/2018 16:28 | 12.1 | 13   | 7.3  | 27.6 | 67.4  | 29.2  | 0.2526 | 1.6 |

|                 |      |      |     |      |      |      |        |     |
|-----------------|------|------|-----|------|------|------|--------|-----|
| 4/19/2018 16:29 | 11.5 | 11   | 8.2 | 26.5 | 67.5 | 29.3 | 0.262  | 1.7 |
| 4/19/2018 16:30 | 10.8 | 10.9 | 7.1 | 26.3 | 67.5 | 29.3 | 0.2758 | 1.7 |
| 4/19/2018 16:31 | 10.1 | 11.2 | 8.5 | 26.8 | 70   | 29.3 | 0.2561 | 1.7 |
| 4/19/2018 16:32 | 10.4 | 12.8 | 7.6 | 27.4 | 21.3 | 18.5 | 0.2504 | 1.7 |
| 4/19/2018 16:33 | 10.5 | 12.7 | 8.4 | 27.6 | 7.7  | 4    | 0.2321 | 1.7 |
| 4/19/2018 16:34 | 10.9 | 13   | 8.3 | 27.7 | 7.4  | 2.3  | 0.2413 | 1.6 |
| 4/19/2018 16:35 | 10.3 | 9.7  | 8.2 | 27.4 | 7.4  | 2.5  | 0.2305 | 1.6 |
| 4/19/2018 16:36 | 8.6  | 9.1  | 8.2 | 27.8 | 7.4  | 2.6  | 0.238  | 1.6 |
| 4/19/2018 16:37 | 6    | 10.5 | 9   | 28.8 | 7.3  | 2.6  | 0.2138 | 1.6 |
| 4/19/2018 16:38 | 3.4  | 11.5 | 8.3 | 28.6 | 7.2  | 2.5  | 0.2109 | 1.7 |
| 4/19/2018 16:39 |      |      | 7.8 | 28.8 | 7.1  | 2.5  | 0.2024 | 1.7 |
| 4/19/2018 16:40 |      |      | 8.9 | 29   | 7    | 2.4  | 0.1953 | 1.7 |
| 4/19/2018 16:41 |      |      | 9   | 28.6 | 7.4  | 2.3  | 0.1981 | 1.7 |
| 4/19/2018 16:42 |      |      | 9   | 28   | 8.5  | 2.3  | 0.19   | 1.7 |
| 4/19/2018 16:43 |      |      | 8.8 | 27.1 | 8.9  | 2.3  | 0.2016 | 1.7 |
| 4/19/2018 16:44 |      |      | 8.3 | 26   | 9.2  | 2.4  | 0.1921 | 1.8 |
| 4/19/2018 16:45 |      |      | 6.8 | 26.3 | 9.5  | 2.4  | 0.2001 | 1.8 |
| 4/19/2018 16:46 |      |      | 7.4 | 26.5 | 10.1 | 2.5  | 0.1721 | 1.8 |
| 4/19/2018 16:47 |      |      | 7.4 | 26.6 | 10.5 | 2.5  | 0.1886 | 1.8 |
| 4/19/2018 16:48 |      |      | 6.8 | 26.5 | 11.2 | 2.5  | 0.18   | 1.8 |
| 4/19/2018 16:49 |      |      | 8.2 | 26.5 | 11.6 | 2.5  | 0.1766 | 1.8 |
| 4/19/2018 16:50 |      |      | 7.6 | 26.7 | 11.8 | 2.5  | 0.1778 | 1.7 |
| 4/19/2018 16:51 |      |      | 7.2 | 26.5 | 12   | 2.4  | 0.1686 | 1.7 |
| 4/19/2018 16:52 |      |      | 6.8 | 26.4 | 12   | 2.4  | 0.1766 | 1.7 |
| 4/19/2018 16:53 |      |      | 7.1 | 26.2 | 11.8 | 2.3  | 0.1641 | 1.8 |
| 4/19/2018 16:54 |      |      | 6.7 | 25.9 | 11.8 | 2.3  | 0.1817 | 1.8 |
| 4/19/2018 16:55 |      |      | 6.5 | 25.1 | 11.7 | 2.3  | 0.1675 | 1.8 |
| 4/19/2018 16:56 |      |      | 8   | 25.8 | 11.5 | 2.3  | 0.1794 | 1.9 |
| 4/19/2018 16:57 |      |      | 6.3 | 26   | 11.4 | 2.3  | 0.1652 | 2   |
| 4/19/2018 16:58 |      |      | 6.1 | 25.6 | 11.1 | 2.3  | 0.1773 | 2   |
| 4/19/2018 16:59 |      |      | 8   | 26.3 | 11.1 | 2.4  | 0.1623 | 2   |
| 4/19/2018 17:00 |      |      | 7.1 | 27.8 | 11   | 2.3  | 0.1543 | 2   |
| 4/19/2018 17:01 |      |      | 8.3 | 28.1 | 10.9 | 2.3  | 0.166  | 1.9 |
| 4/19/2018 17:02 |      |      | 7.9 | 28.1 | 10.6 | 2.3  | 0.1495 | 1.9 |
| 4/19/2018 17:03 |      |      | 7.3 | 27.7 | 10.3 | 2.2  | 0.1576 | 1.9 |
| 4/19/2018 17:04 |      |      | 7.6 | 27.9 | 10   | 2.2  | 0.1467 | 1.9 |
| 4/19/2018 17:05 |      |      | 6.8 | 27.6 | 9.8  | 2.2  | 0.1637 | 1.9 |
| 4/19/2018 17:06 |      |      | 8.5 | 28   | 9.5  | 2.1  | 0.1517 | 2   |
| 4/19/2018 17:07 |      |      | 8.9 | 28.3 | 9.3  | 2.1  | 0.1606 | 1.9 |
| 4/19/2018 17:08 |      |      | 8.7 | 29.1 | 9.1  | 2    | 0.1496 | 1.9 |
| 4/19/2018 17:09 |      |      | 8.3 | 29   | 8.9  | 2    | 0.1599 | 2   |
| 4/19/2018 17:10 |      |      | 8.9 | 28.8 | 8.9  | 2    | 0.1567 | 2   |
| 4/19/2018 17:11 |      |      | 8.4 | 27.9 | 9    | 2    | 0.1627 | 1.9 |
| 4/19/2018 17:12 |      |      | 7.8 | 26.8 | 9.1  | 2    | 0.1606 | 1.9 |
| 4/19/2018 17:13 |      |      | 8   | 26.3 | 9    | 2.1  | 0.1617 | 1.6 |
| 4/19/2018 17:14 |      |      | 7.3 | 26.2 | 8.8  | 2.1  | 0.1623 | 1.7 |
| 4/19/2018 17:15 |      |      | 7   | 25.8 | 8.5  | 2.1  | 0.1509 | 1.7 |

|                 |      |      |     |     |        |     |
|-----------------|------|------|-----|-----|--------|-----|
| 4/19/2018 17:16 | 5.8  | 25.6 | 8.4 | 2.2 | 0.161  | 1.8 |
| 4/19/2018 17:17 | 7.4  | 24.4 | 8.5 | 2.2 | 0.1508 | 1.9 |
| 4/19/2018 17:18 | 5    | 24.3 | 8.1 | 2.3 | 0.1572 | 1.9 |
| 4/19/2018 17:19 | 5.8  | 24.3 | 8.3 | 2.4 | 0.1478 | 2.1 |
| 4/19/2018 17:20 | 5.9  | 24.1 | 8.2 | 2.5 | 0.1708 | 2.1 |
| 4/19/2018 17:21 | 6.6  | 23.6 | 8.3 | 2.5 | 0.1622 | 2.1 |
| 4/19/2018 17:22 | 6.1  | 23.7 | 8.1 | 2.6 | 0.1623 | 2.2 |
| 4/19/2018 17:23 | 5.8  | 23.3 | 8.1 | 2.6 | 0.1576 | 2.2 |
| 4/19/2018 17:24 | 4.3  | 23.1 | 8.1 | 2.7 | 0.1549 | 2   |
| 4/19/2018 17:25 | 7.4  | 23.9 | 8.1 | 2.7 | 0.1586 | 1.9 |
| 4/19/2018 17:26 | 8.8  | 23.8 | 8   | 2.7 | 0.1455 | 1.9 |
| 4/19/2018 17:27 | 7.9  | 23.4 | 8   | 2.7 | 0.1594 | 2   |
| 4/19/2018 17:28 |      | 23.1 | 7.8 | 2.8 | 0.1464 | 2   |
| 4/19/2018 17:29 | 12.9 | 23.2 | 7.7 | 2.8 | 0.1642 | 2.1 |
| 4/19/2018 17:30 | 5.5  | 23.4 | 7.8 | 2.8 | 0.1492 | 2   |
| 4/19/2018 17:31 |      | 23.7 | 7.7 | 2.8 | 0.1613 | 2.1 |
| 4/19/2018 17:32 |      | 23.5 | 7.6 | 2.8 | 0.1528 | 2.1 |
| 4/19/2018 17:33 | 5.1  | 22.8 | 7.6 | 2.8 | 0.1572 | 2.1 |
| 4/19/2018 17:34 |      | 23.3 | 7.5 | 2.9 | 0.152  | 2.1 |
| 4/19/2018 17:35 |      | 23.5 | 7.5 | 2.9 | 0.1472 | 2.2 |
| 4/19/2018 17:36 |      | 23.4 | 7.5 | 2.9 | 0.1567 | 2.3 |
| 4/19/2018 17:37 | 5.8  | 23.6 | 7.5 | 2.9 | 0.1534 | 2.3 |
| 4/19/2018 17:38 | 5.9  | 23.6 | 7.3 | 2.9 | 0.1572 | 2.4 |
| 4/19/2018 17:39 | 6.5  | 22.6 | 7.1 | 2.9 | 0.1464 | 2.4 |
| 4/19/2018 17:40 |      | 23.2 | 7.1 | 2.9 | 0.1606 | 2.3 |
| 4/19/2018 17:41 | 5.6  | 23.4 | 7.1 | 2.9 | 0.1407 | 2.3 |
| 4/19/2018 17:42 | 5.6  | 23.6 | 7   | 2.8 | 0.159  | 2.4 |
| 4/19/2018 17:43 | 5.5  | 22.8 | 6.9 | 2.9 | 0.1449 | 2.4 |
| 4/19/2018 17:44 |      | 22.7 | 6.9 | 2.9 | 0.1581 | 2.4 |
| 4/19/2018 17:45 | 6.9  | 23.9 | 7   | 2.9 | 0.1439 | 2.4 |
| 4/19/2018 17:46 | 6.6  | 23.6 | 6.9 | 2.9 | 0.1511 | 2.2 |
| 4/19/2018 17:47 | 6.2  | 23.4 | 6.9 | 2.9 | 0.1487 | 2.2 |
| 4/19/2018 17:48 | 4.9  | 22.8 | 6.7 | 2.9 | 0.145  | 2.3 |
| 4/19/2018 17:49 | 6.3  | 22.9 | 6.7 | 2.9 | 0.1573 | 2.3 |
| 4/19/2018 17:50 | 6.3  | 23.2 | 6.8 | 2.9 | 0.1427 | 2.4 |
| 4/19/2018 17:51 | 7.8  | 23.6 | 6.7 | 2.9 | 0.1542 | 2.4 |
| 4/19/2018 17:52 | 6.7  | 23.7 | 6.8 | 2.9 | 0.1329 | 2.4 |
| 4/19/2018 17:53 | 7    | 23.6 | 6.8 | 2.8 | 0.1543 | 2.4 |
| 4/19/2018 17:54 | 4.4  | 22.8 | 6.6 | 2.9 | 0.1443 | 2.3 |
| 4/19/2018 17:55 | 5.7  | 22.9 | 6.7 | 2.9 | 0.1503 | 2.2 |
| 4/19/2018 17:56 | 6.9  | 23.3 | 6.7 | 2.9 | 0.137  | 2.2 |
| 4/19/2018 17:57 | 5.1  | 23.8 | 6.8 | 2.8 | 0.1457 | 2.2 |
| 4/19/2018 17:58 | 4.6  | 22.5 | 6.6 | 2.8 | 0.1393 | 2.2 |
| 4/19/2018 17:59 | 5    | 22.2 | 6.5 | 2.9 | 0.1535 | 2   |
| 4/19/2018 18:00 | 5    | 22.7 | 6.5 | 2.9 | 0.1428 | 2.1 |
| 4/19/2018 18:01 | 6    | 23   | 6.6 | 2.9 | 0.1539 | 2.1 |
| 4/19/2018 18:02 | 6.7  | 23.4 | 6.6 | 2.9 | 0.151  | 2.1 |

|                 |     |      |     |     |        |     |
|-----------------|-----|------|-----|-----|--------|-----|
| 4/19/2018 18:03 | 5.3 | 22.8 | 6.6 | 2.9 | 0.1308 | 2   |
| 4/19/2018 18:04 | 5.9 | 22.9 | 6.5 | 2.9 | 0.1497 | 1.8 |
| 4/19/2018 18:05 | 5.9 | 23.2 | 6.6 | 2.9 | 0.1326 | 1.8 |
| 4/19/2018 18:06 | 5.6 | 23.1 | 6.5 | 3   | 0.1477 | 1.8 |
| 4/19/2018 18:07 | 4.6 | 23.2 | 6.5 | 2.9 | 0.1365 | 1.7 |
| 4/19/2018 18:08 | 5.2 | 22.8 | 6.5 | 2.9 | 0.1479 | 1.8 |
| 4/19/2018 18:09 | 5.9 | 22.8 | 6.5 | 2.9 | 0.1406 | 1.8 |
| 4/19/2018 18:10 | 3.5 | 22.1 | 6.5 | 3   | 0.1443 | 1.9 |
| 4/19/2018 18:11 | 5.6 | 23.1 | 6.7 | 3   | 0.1378 | 1.9 |
| 4/19/2018 18:12 | 5.7 | 22.9 | 6.9 | 3   | 0.1434 | 1.9 |
| 4/19/2018 18:13 | 6.1 | 22.7 | 6.8 | 3   | 0.1403 | 1.8 |
| 4/19/2018 18:14 | 6.1 | 22.7 | 7   | 3   | 0.1385 | 1.8 |
| 4/19/2018 18:15 | 5.4 | 22.9 | 6.9 | 3   | 0.1542 | 1.8 |
| 4/19/2018 18:16 | 5.1 | 22.3 | 7   | 3   | 0.1359 | 1.8 |
| 4/19/2018 18:17 | 5.1 | 22.8 | 7   | 3   | 0.1493 | 1.6 |
| 4/19/2018 18:18 | 5.4 | 22.7 | 7.1 | 3   | 0.1351 | 1.7 |
| 4/19/2018 18:19 | 6.5 | 22.5 | 7.1 | 3   | 0.1516 | 1.7 |
| 4/19/2018 18:20 | 5.2 | 22.9 | 7.3 | 2.9 | 0.1296 | 1.5 |
| 4/19/2018 18:21 | 6.1 | 23.1 | 7.2 | 2.9 | 0.1515 | 1.5 |
| 4/19/2018 18:22 | 5.2 | 21.7 | 7   | 3   | 0.1462 | 1.6 |
| 4/19/2018 18:23 | 5.1 | 21.3 | 6.9 | 3   | 0.1478 | 1.7 |
| 4/19/2018 18:24 | 4.8 | 21   | 7   | 3   | 0.1431 | 1.9 |
| 4/19/2018 18:25 | 5.7 | 21.6 | 6.9 | 3   | 0.1393 | 1.9 |
| 4/19/2018 18:26 | 3.5 | 21.5 | 7   | 3   | 0.1434 | 2   |
| 4/19/2018 18:27 | 5.7 | 22.3 | 6.9 | 3   | 0.1465 | 2   |
| 4/19/2018 18:28 | 6.6 | 21.9 | 7   | 3   | 0.1556 | 2.1 |
| 4/19/2018 18:29 | 6.3 | 23.6 | 7   | 3   | 0.138  | 2.2 |
| 4/19/2018 18:30 | 6.8 | 24.5 | 6.9 | 3   | 0.1477 | 2.2 |
| 4/19/2018 18:31 | 7.4 | 25   | 6.8 | 2.9 | 0.1323 | 2.2 |
| 4/19/2018 18:32 | 6.9 | 24.6 | 6.7 | 2.8 | 0.1409 | 2.2 |
| 4/19/2018 18:33 | 6.3 | 23.8 | 6.7 | 2.7 | 0.1253 | 2.2 |
| 4/19/2018 18:34 | 6.7 | 23.9 | 6.4 | 2.7 | 0.1415 | 2.3 |
| 4/19/2018 18:35 | 7.1 | 23.9 | 6.5 | 2.6 | 0.1366 | 2.2 |
| 4/19/2018 18:36 | 5   | 23   | 6.2 | 2.6 | 0.1426 | 2.2 |
| 4/19/2018 18:37 | 5.3 | 22.7 | 6.2 | 2.6 | 0.1405 | 2.3 |
| 4/19/2018 18:38 | 5.2 | 23.4 | 6.2 | 2.6 | 0.1377 | 2.3 |
| 4/19/2018 18:39 | 6.4 | 24   | 6.2 | 2.6 | 0.1427 | 2.3 |
| 4/19/2018 18:40 | 6.8 | 24.1 | 6.2 | 2.6 | 0.1327 | 2.4 |
| 4/19/2018 18:41 | 5.4 | 24.1 | 6.1 | 2.7 | 0.1414 | 2.5 |
| 4/19/2018 18:42 | 7   | 24.2 | 6   | 2.7 | 0.1292 | 2.4 |
| 4/19/2018 18:43 | 6.3 | 23.1 | 5.9 | 2.7 | 0.1462 | 2.2 |
| 4/19/2018 18:44 | 5.4 | 23.5 | 5.9 | 2.7 | 0.1428 | 2.3 |
| 4/19/2018 18:45 | 4.7 | 23.5 | 5.8 | 2.7 | 0.1343 | 2.4 |
| 4/19/2018 18:46 | 4.1 | 22.4 | 5.7 | 2.7 | 0.142  | 2.5 |
| 4/19/2018 18:47 | 6.7 | 22   | 6.1 | 2.8 | 0.1372 | 2.5 |
| 4/19/2018 18:48 | 5.4 | 21.3 | 6.3 | 2.8 | 0.1466 | 2.5 |
| 4/19/2018 18:49 | 5.4 | 21.9 | 6.2 | 2.9 | 0.1321 | 2.3 |

|                 |     |      |     |     |        |     |
|-----------------|-----|------|-----|-----|--------|-----|
| 4/19/2018 18:50 | 4.4 | 22.3 | 6.1 | 2.9 | 0.1438 | 2.4 |
| 4/19/2018 18:51 | 4.7 | 22.6 | 6.2 | 2.9 | 0.1321 | 2.5 |
| 4/19/2018 18:52 | 5.4 | 22.3 | 6   | 2.9 | 0.1412 | 2.4 |
| 4/19/2018 18:53 | 4.6 | 22.2 | 6.2 | 3   | 0.134  | 2.4 |
| 4/19/2018 18:54 | 6.1 | 23   | 6   | 3   | 0.1385 | 2.5 |
| 4/19/2018 18:55 | 5.4 | 23.1 | 5.9 | 2.9 | 0.1366 | 2.4 |
| 4/19/2018 18:56 | 5.8 | 23.7 | 5.6 | 2.9 | 0.1329 | 2.5 |
| 4/19/2018 18:57 | 5.6 | 24.8 | 5.6 | 2.8 | 0.1356 | 2.6 |
| 4/19/2018 18:58 | 5.3 | 23.8 | 5.4 | 2.8 | 0.1342 | 2.6 |
| 4/19/2018 18:59 | 5.3 | 24   | 5.4 | 2.7 | 0.135  | 2.5 |
| 4/19/2018 19:00 | 4.8 | 24.8 | 5.4 | 2.7 | 0.1312 | 2.5 |
| 4/19/2018 19:01 | 6   | 24.4 | 5.3 | 2.6 | 0.1391 | 2.6 |
| 4/19/2018 19:02 | 6.5 | 24.1 | 5.2 | 2.6 | 0.1243 | 2.6 |
| 4/19/2018 19:03 | 6.6 | 24.4 | 5.1 | 2.5 | 0.1414 | 2.5 |
| 4/19/2018 19:04 | 6   | 24.8 | 5.2 | 2.5 | 0.1288 | 2.5 |
| 4/19/2018 19:05 | 5.9 | 24.9 | 5.1 | 2.5 | 0.141  | 2.5 |
| 4/19/2018 19:06 | 6.3 | 25.4 | 5.1 | 2.5 | 0.124  | 2.5 |
| 4/19/2018 19:07 | 5.9 | 24   | 5.1 | 2.4 | 0.1349 | 2.5 |
| 4/19/2018 19:08 | 5.9 | 23.5 | 5   | 2.4 | 0.1366 | 2.4 |
| 4/19/2018 19:09 | 5.3 | 24   | 5   | 2.5 | 0.1261 | 2.4 |
| 4/19/2018 19:10 | 5.4 | 23.1 | 5.1 | 2.5 | 0.1349 | 2.5 |
| 4/19/2018 19:11 | 4.1 | 21.9 | 5.6 | 2.6 | 0.1392 | 2.5 |
| 4/19/2018 19:12 | 4.7 | 21.6 | 5.8 | 2.6 | 0.1489 | 2.5 |
| 4/19/2018 19:13 | 4.8 | 21.8 | 5.8 | 2.7 | 0.1333 | 2.6 |
| 4/19/2018 19:14 | 4.3 | 22.3 | 5.7 | 2.8 | 0.1452 | 2.5 |
| 4/19/2018 19:15 | 3.9 | 22.5 | 5.7 | 2.9 | 0.1263 | 2.5 |
| 4/19/2018 19:16 | 6.3 | 22.8 | 5.7 | 2.9 | 0.1514 | 2.6 |
| 4/19/2018 19:17 | 5.2 | 22.3 | 5.8 | 3   | 0.1333 | 2.6 |
| 4/19/2018 19:18 | 4.6 | 22.7 | 5.7 | 3   | 0.1332 | 2.6 |
| 4/19/2018 19:19 | 5.3 | 23.3 | 5.6 | 2.9 | 0.1371 | 2.6 |
| 4/19/2018 19:20 | 6.8 | 24.7 | 5.6 | 2.9 | 0.1249 | 2.6 |
| 4/19/2018 19:21 | 6.3 | 24.8 | 5.4 | 2.8 | 0.1299 | 2.6 |
| 4/19/2018 19:22 | 4.9 | 24.8 | 5.4 | 2.7 | 0.122  | 2.5 |
| 4/19/2018 19:23 | 7   | 24.6 | 5.3 | 2.7 | 0.1349 | 2.5 |
| 4/19/2018 19:24 | 7.7 | 25.5 | 5.3 | 2.6 | 0.1196 | 2.6 |
| 4/19/2018 19:25 | 6.1 | 24.8 | 5.3 | 2.5 | 0.1267 | 2.6 |
| 4/19/2018 19:26 | 6.4 | 24.7 | 5.3 | 2.4 | 0.1314 | 2.5 |
| 4/19/2018 19:27 | 6   | 24.3 | 5.2 | 2.4 | 0.1246 | 2.5 |
| 4/19/2018 19:28 | 6   | 24.7 | 5.2 | 2.3 | 0.1413 | 2.5 |
| 4/19/2018 19:29 | 5.8 | 24.4 | 5.1 | 2.3 | 0.1232 | 2.5 |
| 4/19/2018 19:30 | 5.7 | 24.5 | 5.1 | 2.3 | 0.1376 | 2.5 |
| 4/19/2018 19:31 | 6.5 | 24.8 | 5.1 | 2.3 | 0.1239 | 2.5 |
| 4/19/2018 19:32 | 6.4 | 24   | 5.1 | 2.3 | 0.1368 | 2.5 |
| 4/19/2018 19:33 | 6.8 | 23   | 5.1 | 2.4 | 0.1248 | 2.6 |
| 4/19/2018 19:34 | 4.4 | 22   | 5.3 | 2.5 | 0.1342 | 2.4 |
| 4/19/2018 19:35 | 5.4 | 21.6 | 5.5 | 2.6 | 0.1396 | 2.4 |
| 4/19/2018 19:36 | 5.2 | 21.6 | 5.5 | 2.7 | 0.1316 | 2.4 |

|                 |     |      |     |     |        |     |
|-----------------|-----|------|-----|-----|--------|-----|
| 4/19/2018 19:37 | 5.2 | 22.1 | 5.4 | 2.7 | 0.1395 | 2.5 |
| 4/19/2018 19:38 | 5.6 | 22.3 | 5.4 | 2.8 | 0.1223 | 2.5 |
| 4/19/2018 19:39 | 6   | 22.1 | 5.4 | 2.8 | 0.1465 | 2.6 |
| 4/19/2018 19:40 | 3.7 | 22.1 | 5.3 | 2.9 | 0.1272 | 2.5 |
| 4/19/2018 19:41 | 5.7 | 21.7 | 5.3 | 3   | 0.1401 | 2.5 |
| 4/19/2018 19:42 | 5.7 | 22   | 5.2 | 3   | 0.1221 | 2.5 |
| 4/19/2018 19:43 | 4.8 | 22.8 | 5.2 | 2.9 | 0.131  | 2.5 |
| 4/19/2018 19:44 | 6.2 | 23.3 | 5   | 2.9 | 0.1264 | 2.6 |
| 4/19/2018 19:45 | 6.9 | 24.2 | 4.9 | 2.8 | 0.1332 | 2.6 |
| 4/19/2018 19:46 | 5.9 | 24.5 | 4.9 | 2.8 | 0.1356 | 2.5 |
| 4/19/2018 19:47 | 5.2 | 23.9 | 4.8 | 2.7 | 0.1306 | 2.6 |
| 4/19/2018 19:48 | 6   | 25.1 | 4.8 | 2.6 | 0.137  | 2.7 |
| 4/19/2018 19:49 | 6.1 | 24.6 | 4.8 | 2.5 | 0.1179 | 2.6 |
| 4/19/2018 19:50 | 6.3 | 24.1 | 4.8 | 2.5 | 0.1382 | 2.5 |
| 4/19/2018 19:51 | 6.5 | 23.9 | 4.7 | 2.4 | 0.1235 | 2.5 |
| 4/19/2018 19:52 | 6.1 | 24.4 | 4.8 | 2.3 | 0.1272 | 2.5 |
| 4/19/2018 19:53 | 7.5 | 23.5 | 4.8 | 2.3 | 0.1242 | 2.4 |
| 4/19/2018 19:54 | 4.9 | 22.6 | 4.8 | 2.4 | 0.1265 | 2.4 |
| 4/19/2018 19:55 | 4.8 | 21.6 | 5.1 | 2.5 | 0.1266 | 2.3 |
| 4/19/2018 19:56 | 3.7 | 21.2 | 5.2 | 2.6 | 0.1323 | 2.3 |
| 4/19/2018 19:57 | 4.5 | 21.9 | 5.2 | 2.7 | 0.1354 | 2.2 |
| 4/19/2018 19:58 | 4.6 | 21.3 | 5.1 | 2.7 | 0.1279 | 2.3 |
| 4/19/2018 19:59 | 5.1 | 21.7 | 5.2 | 2.8 | 0.1304 | 2.3 |
| 4/19/2018 20:00 | 4.4 | 21.4 | 5.2 | 2.9 | 0.1254 | 2.4 |
| 4/19/2018 20:01 | 5.1 | 21.3 | 5.2 | 3   | 0.1442 | 2.3 |
| 4/19/2018 20:02 | 5.3 | 21.7 | 5.2 | 3.1 | 0.1259 | 2.3 |
| 4/19/2018 20:03 | 4.6 | 21.9 | 5.2 | 3.1 | 0.1416 | 2.3 |
| 4/19/2018 20:04 | 5.5 | 23.8 | 5.2 | 3   | 0.1323 | 2.4 |
| 4/19/2018 20:05 | 6   | 24.3 | 5.1 | 2.9 | 0.1259 | 2.4 |
| 4/19/2018 20:06 | 6.2 | 23.5 | 5.1 | 2.8 | 0.1337 | 2.4 |
| 4/19/2018 20:07 | 5.9 | 24   | 5   | 2.8 | 0.1168 | 2.4 |
| 4/19/2018 20:08 | 6.4 | 25.1 | 5.1 | 2.6 | 0.1353 | 2.3 |
| 4/19/2018 20:09 | 4.6 | 24.5 | 5   | 2.5 | 0.1226 | 2.3 |
| 4/19/2018 20:10 | 6.4 | 24.7 | 5   | 2.4 | 0.1328 | 2.3 |
| 4/19/2018 20:11 | 6.3 | 24.1 | 5   | 2.3 | 0.1212 | 2.4 |
| 4/19/2018 20:12 | 5.5 | 23.6 | 5   | 2.3 | 0.1293 | 2.5 |
| 4/19/2018 20:13 | 6.2 | 24.5 | 4.9 | 2.3 | 0.127  | 2.4 |
| 4/19/2018 20:14 | 6   | 23.1 | 4.9 | 2.3 | 0.1268 | 2.3 |
| 4/19/2018 20:15 | 5   | 21.8 | 5   | 2.3 | 0.1311 | 2.3 |
| 4/19/2018 20:16 | 6   | 22   | 5   | 2.4 | 0.1318 | 2.2 |
| 4/19/2018 20:17 | 4.9 | 21.8 | 5   | 2.5 | 0.1344 | 2.2 |
| 4/19/2018 20:18 | 5.4 | 22   | 5   | 2.6 | 0.1246 | 2.1 |
| 4/19/2018 20:19 | 4.9 | 21.6 | 5   | 2.7 | 0.1365 | 2   |
| 4/19/2018 20:20 |     | 22.4 | 4.9 | 2.7 | 0.1232 | 2   |
| 4/19/2018 20:21 | 5.8 | 21.7 | 4.9 | 2.8 | 0.133  | 2.1 |
| 4/19/2018 20:22 | 8   | 21.8 | 4.9 | 2.9 | 0.1239 | 2.1 |
| 4/19/2018 20:23 |     | 22.9 | 4.8 | 2.9 | 0.1259 | 2   |

|                 |     |      |     |     |        |     |
|-----------------|-----|------|-----|-----|--------|-----|
| 4/19/2018 20:24 |     | 23.1 | 4.7 | 2.9 | 0.1315 | 2.1 |
| 4/19/2018 20:25 | 6.4 | 25.2 | 4.7 | 2.8 | 0.1273 | 2.1 |
| 4/19/2018 20:26 | 5.3 | 24.9 | 4.6 | 2.7 | 0.137  | 2.2 |
| 4/19/2018 20:27 | 6.2 | 25.1 | 4.6 | 2.7 | 0.1204 | 2.1 |
| 4/19/2018 20:28 | 7.6 | 25.8 | 4.5 | 2.6 | 0.1395 | 2.1 |
| 4/19/2018 20:29 | 7.1 | 25.8 | 4.5 | 2.5 | 0.1224 | 2.1 |
| 4/19/2018 20:30 | 6.5 | 25.2 | 4.5 | 2.4 | 0.1367 | 2.1 |
| 4/19/2018 20:31 | 6.5 | 24.9 | 4.5 | 2.3 | 0.1303 | 2.2 |
| 4/19/2018 20:32 | 7.9 | 24.8 | 4.4 | 2.2 | 0.1354 | 2.2 |
| 4/19/2018 20:33 | 7   | 25.2 | 4.4 | 2.2 | 0.1289 | 2.2 |
| 4/19/2018 20:34 |     | 24.1 | 4.4 | 2.2 | 0.1183 | 2.2 |
| 4/19/2018 20:35 |     | 21.6 | 4.7 | 2.2 | 0.136  | 2.2 |
| 4/19/2018 20:36 |     | 21.8 | 4.8 | 2.3 | 0.1175 | 2.1 |
| 4/19/2018 20:37 |     | 22   | 4.7 | 2.4 | 0.1302 | 2.2 |
| 4/19/2018 20:38 | 6.6 | 21.5 | 4.7 | 2.5 | 0.122  | 2.3 |
| 4/19/2018 20:39 | 3.3 | 21.1 | 4.8 | 2.6 | 0.1347 | 2.4 |
| 4/19/2018 20:40 |     | 21.1 | 4.8 | 2.7 | 0.1349 | 2.3 |
| 4/19/2018 20:41 | 4.7 | 21.6 | 4.8 | 2.8 | 0.1259 | 2.4 |
| 4/19/2018 20:42 | 7.8 | 21.9 | 4.7 | 2.9 | 0.1369 | 2.5 |
| 4/19/2018 20:43 | 5.1 | 22   | 4.7 | 3   | 0.1214 | 2.3 |
| 4/19/2018 20:44 | 4.3 | 21.4 | 4.7 | 3   | 0.1343 | 2.1 |
| 4/19/2018 20:45 | 3.8 | 21.2 | 4.7 | 3   | 0.1289 | 2.2 |
| 4/19/2018 20:46 | 5.7 | 22.9 | 4.6 | 3   | 0.1383 | 2.4 |
| 4/19/2018 20:47 | 5.4 | 24.5 | 4.5 | 2.9 | 0.1292 | 2.4 |
| 4/19/2018 20:48 | 6   | 24.6 | 4.5 | 2.8 | 0.1244 | 2.2 |
| 4/19/2018 20:49 | 7   | 24.3 | 4.5 | 2.7 | 0.1326 | 2.5 |
| 4/19/2018 20:50 | 6.7 | 25.1 | 4.4 | 2.6 | 0.1231 | 2.1 |
| 4/19/2018 20:51 | 7.9 | 25   | 4.4 | 2.5 | 0.1326 | 2   |
| 4/19/2018 20:52 | 6.6 | 24.3 | 4.4 | 2.4 | 0.1245 | 2   |
| 4/19/2018 20:53 | 6.1 | 24.9 | 4.4 | 2.3 | 0.1231 | 2.1 |
| 4/19/2018 20:54 | 6.4 | 24.6 | 4.4 | 2.3 | 0.1268 | 2.2 |
| 4/19/2018 20:55 | 5.6 | 24.7 | 4.4 | 2.2 | 0.1262 | 2.1 |
| 4/19/2018 20:56 | 6.7 | 24   | 4.3 | 2.2 | 0.1369 | 2.2 |
| 4/19/2018 20:57 | 3.6 | 23.4 | 4.3 | 2.2 | 0.1235 | 2.3 |
| 4/19/2018 20:58 | 4.7 | 21.4 | 4.6 | 2.4 | 0.1418 | 2.5 |
| 4/19/2018 20:59 | 4.1 | 21.3 | 4.6 | 2.4 | 0.1274 | 2.6 |
| 4/19/2018 21:00 | 4.5 | 21.6 | 4.6 | 2.5 | 0.1351 | 2.6 |
| 4/19/2018 21:01 | 4.9 | 21   | 4.6 | 2.6 | 0.13   | 2.6 |
| 4/19/2018 21:02 | 4.9 | 20.9 | 4.6 | 2.7 | 0.1362 | 2.8 |
| 4/19/2018 21:03 | 4.8 | 20.9 | 4.6 | 2.8 | 0.1382 | 2.4 |
| 4/19/2018 21:04 | 3.7 | 20.6 | 4.5 | 2.9 | 0.1203 | 2   |
| 4/19/2018 21:05 | 3.5 | 21.6 | 4.5 | 3   | 0.1396 | 2.1 |
| 4/19/2018 21:06 | 4.1 | 21.2 | 4.5 | 3   | 0.1235 | 2.2 |
| 4/19/2018 21:07 | 3.7 | 21.1 | 4.5 | 3   | 0.1397 | 2.4 |
| 4/19/2018 21:08 | 5.5 | 20.7 | 4.5 | 3   | 0.1349 | 2.5 |
| 4/19/2018 21:09 | 4.6 | 21.2 | 4.4 | 3   | 0.1306 | 2.6 |
| 4/19/2018 21:10 | 5.6 | 23.1 | 4.3 | 3   | 0.1433 | 2.4 |

|                 |     |      |     |     |        |     |
|-----------------|-----|------|-----|-----|--------|-----|
| 4/19/2018 21:11 | 4.6 | 23.2 | 4.2 | 2.9 | 0.1278 | 2.6 |
| 4/19/2018 21:12 | 5.9 | 23.6 | 4.2 | 2.8 | 0.1352 | 2.7 |
| 4/19/2018 21:13 | 5.8 | 23.9 | 4.2 | 2.7 | 0.1265 | 2.8 |
| 4/19/2018 21:14 | 5.2 | 24.3 | 4.2 | 2.6 | 0.1331 | 2.8 |
| 4/19/2018 21:15 | 6.2 | 24.1 | 4.2 | 2.5 | 0.1265 | 2.8 |
| 4/19/2018 21:16 | 6.5 | 24.2 | 4.2 | 2.4 | 0.1351 | 2.9 |
| 4/19/2018 21:17 | 6.3 | 23.6 | 4.2 | 2.4 | 0.1334 | 2.9 |
| 4/19/2018 21:18 | 6.5 | 23.9 | 4.3 | 2.3 | 0.1343 | 2.9 |
| 4/19/2018 21:19 | 5.5 | 22.5 | 4.3 | 2.3 | 0.1365 | 2.8 |
| 4/19/2018 21:20 | 4.4 | 21   | 4.4 | 2.3 | 0.1289 | 2.8 |
| 4/19/2018 21:21 | 4.9 | 21.2 | 4.5 | 2.4 | 0.1354 | 2.7 |
| 4/19/2018 21:22 | 5.5 | 21.5 | 4.5 | 2.5 | 0.127  | 2.7 |
| 4/19/2018 21:23 | 6.5 | 20.8 | 4.5 | 2.6 | 0.1401 | 2.6 |
| 4/19/2018 21:24 | 4.5 | 20.7 | 4.5 | 2.7 | 0.1266 | 2.3 |
| 4/19/2018 21:25 | 4.5 | 20.4 | 4.5 | 2.8 | 0.1278 | 2.4 |
| 4/19/2018 21:26 | 4.6 | 20.6 | 4.5 | 2.9 | 0.1338 | 2.4 |
| 4/19/2018 21:27 | 4.5 | 20.7 | 4.5 | 3   | 0.1268 | 2.6 |
| 4/19/2018 21:28 | 5.7 | 20.9 | 4.5 | 3.1 | 0.1323 | 2.7 |
| 4/19/2018 21:29 | 4.1 | 20.8 | 4.5 | 3.1 | 0.132  | 2.9 |
| 4/19/2018 21:30 | 4.3 | 21.1 | 4.6 | 3.1 | 0.1297 | 2.1 |
| 4/19/2018 21:31 | 3.4 | 20.4 | 4.5 | 3.1 | 0.1367 | 1.4 |
| 4/19/2018 21:32 | 4.5 | 21.4 | 4.6 | 3.1 | 0.1295 | 1.3 |
| 4/19/2018 21:33 | 5.3 | 22.7 | 4.7 | 3   | 0.1401 | 1.3 |
| 4/19/2018 21:34 | 5   | 23   | 4.8 | 2.9 | 0.1211 | 1.3 |
| 4/19/2018 21:35 | 6.5 | 23.8 | 4.9 | 2.8 | 0.1374 | 1.3 |
| 4/19/2018 21:36 | 5.6 | 24   | 4.9 | 2.7 | 0.1191 | 1.4 |
| 4/19/2018 21:37 | 5.1 | 23   | 4.9 | 2.6 | 0.121  | 1.5 |
| 4/19/2018 21:38 | 6.6 | 23.5 | 4.9 | 2.5 | 0.1276 | 1.6 |
| 4/19/2018 21:39 | 5.1 | 23.4 | 4.9 | 2.4 | 0.1296 | 1.6 |
| 4/19/2018 21:40 | 4.2 | 23.1 | 4.8 | 2.3 | 0.1332 | 1.7 |
| 4/19/2018 21:41 | 4.3 | 22.3 | 4.8 | 2.3 | 0.1338 | 1.8 |
| 4/19/2018 21:42 | 5.2 | 20.8 | 4.7 | 2.3 | 0.1436 | 1.9 |
| 4/19/2018 21:43 | 5.1 | 20.9 | 4.7 | 2.4 | 0.1357 | 2   |
| 4/19/2018 21:44 | 4.9 | 20.5 | 4.7 | 2.5 | 0.1389 | 2.1 |
| 4/19/2018 21:45 | 4.7 | 20.7 | 4.7 | 2.6 | 0.1219 | 2.1 |
| 4/19/2018 21:46 | 4.9 | 20.2 | 4.6 | 2.7 | 0.1394 | 2.2 |
| 4/19/2018 21:47 | 4.5 | 20.5 | 4.6 | 2.8 | 0.1331 | 2.3 |
| 4/19/2018 21:48 | 4.3 | 20.7 | 4.6 | 2.9 | 0.1309 | 2.3 |
| 4/19/2018 21:49 | 4.9 | 21.1 | 4.6 | 2.9 | 0.135  | 2.4 |
| 4/19/2018 21:50 | 4.1 | 20.5 | 4.6 | 3   | 0.1344 | 2.4 |
| 4/19/2018 21:51 | 3.8 | 20.6 | 4.6 | 3   | 0.1407 | 2.4 |
| 4/19/2018 21:52 | 3.8 | 20.1 | 4.6 | 3   | 0.1244 | 2.5 |
| 4/19/2018 21:53 | 7.2 | 22.5 | 4.6 | 3   | 0.139  | 2.6 |
| 4/19/2018 21:54 | 5.7 | 23   | 4.7 | 2.9 | 0.1225 | 2.6 |
| 4/19/2018 21:55 | 6.1 | 22.5 | 4.7 | 2.8 | 0.1385 | 2.6 |
| 4/19/2018 21:56 | 5.1 | 23.6 | 4.7 | 2.7 | 0.1287 | 2.6 |
| 4/19/2018 21:57 | 5.3 | 23.5 | 4.7 | 2.6 | 0.1277 | 2.7 |



|                 |     |      |     |     |        |     |
|-----------------|-----|------|-----|-----|--------|-----|
| 4/19/2018 21:58 | 5.9 | 23.1 | 4.8 | 2.5 | 0.1322 | 2.7 |
| 4/19/2018 21:59 | 5.8 | 23.2 | 4.8 | 2.4 | 0.1211 | 2.7 |
| 4/19/2018 22:00 | 3.8 | 21.7 | 4.7 | 2.4 | 0.1382 | 2.7 |
| 4/19/2018 22:01 | 4.4 | 20.6 | 4.6 | 2.4 | 0.128  | 2.5 |
| 4/19/2018 22:02 | 5.5 | 20.4 | 4.6 | 2.4 | 0.1322 | 2.3 |
| 4/19/2018 22:03 | 4.4 | 20.9 | 4.6 | 2.5 | 0.1465 | 1.8 |
| 4/19/2018 22:04 | 5.9 | 20.1 | 4.6 | 2.5 | 0.1264 | 1.7 |
| 4/19/2018 22:05 | 4.5 | 20.4 | 4.5 | 2.7 | 0.1392 | 1.7 |
| 4/19/2018 22:06 | 5.8 | 19.7 | 4.6 | 2.8 | 0.1246 | 1.7 |
| 4/19/2018 22:07 | 4.6 | 20.1 | 4.6 | 2.9 | 0.1364 | 1.8 |
| 4/19/2018 22:08 | 4   | 20   | 4.5 | 3   | 0.1382 | 1.8 |
| 4/19/2018 22:09 | 4.9 | 20.6 | 4.7 | 3.1 | 0.1289 | 1.8 |
| 4/19/2018 22:10 | 4.2 | 20.6 | 5   | 3.1 | 0.1462 | 1.9 |
| 4/19/2018 22:11 | 5.2 | 20.5 | 5   | 3.1 | 0.1315 | 2   |
| 4/19/2018 22:12 | 2.7 | 20.1 | 4.9 | 3.1 | 0.1288 | 2.1 |
| 4/19/2018 22:13 | 4.6 | 20.7 | 5.2 | 3.1 | 0.1218 | 2.1 |
| 4/19/2018 22:14 | 3.9 | 20.2 | 5.3 | 3   | 0.1417 | 2.1 |
| 4/19/2018 22:15 | 3.4 | 21.2 | 5.4 | 3   | 0.133  | 2.2 |
| 4/19/2018 22:16 | 3.9 | 21.6 | 6.1 | 2.9 | 0.1294 | 2.3 |
| 4/19/2018 22:17 | 5.6 | 21.3 | 6.2 | 2.8 | 0.1374 | 2.3 |
| 4/19/2018 22:18 | 5.3 | 21.4 | 6.5 | 2.8 | 0.1246 | 1.6 |
| 4/19/2018 22:19 | 4.4 | 22   | 6.8 | 2.7 | 0.1388 | 1.7 |
| 4/19/2018 22:20 | 5.6 | 21.8 | 6.9 | 2.6 | 0.1278 | 2   |
| 4/19/2018 22:21 | 5.6 | 21.9 | 6.8 | 2.5 | 0.1393 | 2.2 |
| 4/19/2018 22:22 | 4.3 | 20.8 | 6.7 | 2.5 | 0.1349 | 2.4 |
| 4/19/2018 22:23 | 4.7 | 20.1 | 5.3 | 2.6 | 0.1362 | 2.2 |
| 4/19/2018 22:24 | 4.4 | 19.8 | 5.4 | 2.6 | 0.1328 | 1.9 |
| 4/19/2018 22:25 | 2.5 | 19.6 | 5.7 | 2.7 | 0.1257 | 2.2 |
| 4/19/2018 22:26 | 3.5 | 19.7 | 5.4 | 2.7 | 0.1393 | 2.4 |
| 4/19/2018 22:27 | 2.7 | 19.9 | 5.1 | 2.8 | 0.1214 | 2.3 |
| 4/19/2018 22:28 | 3.5 | 19.6 | 5.1 | 2.9 | 0.1419 | 1.9 |
| 4/19/2018 22:29 | 4.1 | 19.9 | 5.2 | 3   | 0.119  | 2.2 |
| 4/19/2018 22:30 | 5.2 | 19.8 | 5.2 | 3.1 | 0.1393 | 2.4 |
| 4/19/2018 22:31 | 3.9 | 19.9 | 5.1 | 3.1 | 0.1359 | 2.5 |
| 4/19/2018 22:32 | 4.3 | 19.6 | 5.1 | 3.1 | 0.1307 | 2.6 |
| 4/19/2018 22:33 | 3.5 | 19.8 | 5.2 | 3.1 | 0.1321 | 2.7 |
| 4/19/2018 22:34 | 5.2 | 20   | 5.4 | 3.1 | 0.1271 | 2.7 |
| 4/19/2018 22:35 | 4   | 19.9 | 5.5 | 3.1 | 0.1385 | 2.8 |
| 4/19/2018 22:36 | 3.7 | 20.2 | 5.6 | 3.1 | 0.1188 | 2.2 |
| 4/19/2018 22:37 | 2.8 | 19.9 | 5.4 | 3.1 | 0.1349 | 2   |
| 4/19/2018 22:38 | 3.6 | 20.2 | 5.4 | 3   | 0.1287 | 2.4 |
| 4/19/2018 22:39 | 3.8 | 19.8 | 5.4 | 3   | 0.1313 | 2.7 |
| 4/19/2018 22:40 | 5.4 | 20.8 | 5.7 | 3   | 0.1298 | 2.8 |
| 4/19/2018 22:41 | 4.5 | 21.1 | 5.9 | 2.9 | 0.1254 | 2.9 |
| 4/19/2018 22:42 | 4.8 | 21.1 | 5.9 | 2.9 | 0.1396 | 2.9 |
| 4/19/2018 22:43 | 5.7 | 21.8 | 6.1 | 2.8 | 0.1249 | 2.4 |
| 4/19/2018 22:44 | 4.4 | 21.6 | 6.4 | 2.7 | 0.13   | 2.2 |

|                 |     |      |     |     |        |     |
|-----------------|-----|------|-----|-----|--------|-----|
| 4/19/2018 22:45 | 5   | 20.9 | 6.4 | 2.7 | 0.1279 | 2.6 |
| 4/19/2018 22:46 | 6.2 | 21.8 | 6.4 | 2.6 | 0.128  | 2.8 |
| 4/19/2018 22:47 | 6   | 21.6 | 6.5 | 2.5 | 0.1321 | 2.9 |
| 4/19/2018 22:48 | 4.4 | 20.5 | 6.3 | 2.5 | 0.1238 | 2.7 |
| 4/19/2018 22:49 | 3   | 19.6 | 5.4 | 2.5 | 0.1418 | 2.7 |
| 4/19/2018 22:50 | 3.7 | 19.8 | 5.5 | 2.6 | 0.1263 | 2.9 |
| 4/19/2018 22:51 | 4.4 | 19.5 | 5.7 | 2.6 | 0.1362 | 2.7 |
| 4/19/2018 22:52 | 3.3 | 19.3 | 5.5 | 2.7 | 0.1257 | 2.7 |
| 4/19/2018 22:53 | 5.1 | 19.3 | 5.4 | 2.8 | 0.1358 | 2.9 |
| 4/19/2018 22:54 | 4   | 19.6 | 5.3 | 2.9 | 0.1322 | 2.9 |
| 4/19/2018 22:55 | 2.1 | 19.3 | 5.4 | 3   | 0.1291 | 2.9 |
| 4/19/2018 22:56 | 3   | 19.4 | 5.4 | 3.1 | 0.1393 | 2.9 |
| 4/19/2018 22:57 | 3.6 | 19.3 | 5.4 | 3.1 | 0.127  | 3   |
| 4/19/2018 22:58 | 3.7 | 19.4 | 5.4 | 3.1 | 0.1365 | 2.9 |
| 4/19/2018 22:59 | 5.1 | 19.4 | 5.4 | 3.2 | 0.1235 | 3   |
| 4/19/2018 23:00 | 4   | 19.6 | 5.4 | 3.2 | 0.1334 | 3   |
| 4/19/2018 23:01 | 4.9 | 19.6 | 5.4 | 3.2 | 0.1277 | 3   |
| 4/19/2018 23:02 | 4   | 20   | 5.6 | 3.1 | 0.1354 | 2.5 |
| 4/19/2018 23:03 | 5.2 | 19.8 | 5.5 | 3.1 | 0.1358 | 2.2 |
| 4/19/2018 23:04 | 4.9 | 19.8 | 5.4 | 3.1 | 0.1297 | 2.3 |
| 4/19/2018 23:05 | 4.3 | 20.6 | 5.5 | 3.1 | 0.1372 | 2.7 |
| 4/19/2018 23:06 | 3   | 19.6 | 5.5 | 3.1 | 0.124  | 2.9 |
| 4/19/2018 23:07 | 4.9 | 21.3 | 5.6 | 3.1 | 0.1403 | 2.7 |
| 4/19/2018 23:08 | 4.2 | 21.6 | 5.7 | 3   | 0.1265 | 2.6 |
| 4/19/2018 23:09 | 5.7 | 21.3 | 5.8 | 2.9 | 0.128  | 3   |
| 4/19/2018 23:10 | 4.7 | 21.9 | 5.7 | 2.8 | 0.1345 | 3.2 |
| 4/19/2018 23:11 | 5.5 | 21.8 | 5.7 | 2.7 | 0.1346 | 3.2 |
| 4/19/2018 23:12 | 5.6 | 21.7 | 5.7 | 2.6 | 0.1401 | 3.2 |
| 4/19/2018 23:13 | 5.7 | 22.1 | 5.6 | 2.5 | 0.1242 | 3.1 |
| 4/19/2018 23:14 | 4.7 | 21.8 | 5.6 | 2.5 | 0.1373 | 2.3 |
| 4/19/2018 23:15 | 5.1 | 20.7 | 5.5 | 2.4 | 0.1166 | 2.4 |
| 4/19/2018 23:16 | 4.2 | 19.8 | 5.3 | 2.4 | 0.1316 | 2.7 |
| 4/19/2018 23:17 | 4.7 | 19.8 | 5.3 | 2.5 | 0.1218 | 2.8 |
| 4/19/2018 23:18 | 4.4 | 19.8 | 5.3 | 2.5 | 0.1279 | 2.8 |
| 4/19/2018 23:19 | 4.4 | 19.2 | 5.3 | 2.6 | 0.1289 | 2.9 |
| 4/19/2018 23:20 | 4.4 | 19.3 | 5.2 | 2.7 | 0.1252 | 3   |
| 4/19/2018 23:21 | 4.8 | 19.4 | 5.2 | 2.8 | 0.1393 | 2.9 |
| 4/19/2018 23:22 | 2.2 | 19.6 | 5.2 | 2.9 | 0.1218 | 3   |
| 4/19/2018 23:23 | 4.1 | 19.4 | 5.1 | 3   | 0.142  | 3.1 |
| 4/19/2018 23:24 | 3.2 | 19.6 | 5.1 | 3   | 0.1219 | 3.1 |
| 4/19/2018 23:25 | 4.2 | 19.6 | 5.1 | 3   | 0.1384 | 3.2 |
| 4/19/2018 23:26 | 2.6 | 19.8 | 5.1 | 3.1 | 0.1304 | 3.2 |
| 4/19/2018 23:27 | 3.6 | 19.8 | 5.1 | 3.1 | 0.1241 | 3   |
| 4/19/2018 23:28 | 3.7 | 19.5 | 5   | 3.1 | 0.1423 | 3   |
| 4/19/2018 23:29 | 4.3 | 19.8 | 5   | 3   | 0.1252 | 3   |
| 4/19/2018 23:30 | 3.7 | 19.4 | 5   | 3   | 0.1356 | 3   |
| 4/19/2018 23:31 | 5   | 19.6 | 5   | 3   | 0.1263 | 3   |

|                 |      |      |     |     |        |     |
|-----------------|------|------|-----|-----|--------|-----|
| 4/19/2018 23:32 | 4.4  | 20.6 | 4.9 | 3   | 0.1271 | 2.6 |
| 4/19/2018 23:33 | 5.1  | 20.1 | 4.8 | 2.9 | 0.1343 | 2.3 |
| 4/19/2018 23:34 | 4.4  | 20.8 | 4.8 | 2.9 | 0.1274 | 2.6 |
| 4/19/2018 23:35 | 5.6  | 20.9 | 4.8 | 2.8 | 0.1339 | 2.7 |
| 4/19/2018 23:36 | 4.2  | 21.2 | 4.7 | 2.8 | 0.1244 | 2.8 |
| 4/19/2018 23:37 | 4.7  | 21.2 | 4.7 | 2.7 | 0.1381 | 2.9 |
| 4/19/2018 23:38 | 4.7  | 20.4 | 4.7 | 2.6 | 0.1178 | 3   |
| 4/19/2018 23:39 | 2.9  | 19.2 | 4.8 | 2.6 | 0.1397 | 3   |
| 4/19/2018 23:40 | 3.5  | 19.5 | 4.8 | 2.7 | 0.1263 | 3   |
| 4/19/2018 23:41 | 4.1  | 19.5 | 4.8 | 2.7 | 0.1347 | 3   |
| 4/19/2018 23:42 | 3.4  | 19.3 | 4.8 | 2.7 | 0.1292 | 3   |
| 4/19/2018 23:43 | 3.7  | 19.1 | 4.8 | 2.8 | 0.1201 | 3   |
| 4/19/2018 23:44 | 3.7  | 19.1 | 4.9 | 2.8 | 0.1381 | 3   |
| 4/19/2018 23:45 | 4.4  | 18.9 | 4.9 | 2.9 | 0.1205 | 3   |
| 4/19/2018 23:46 | 4    | 19   | 4.9 | 3   | 0.1325 | 3   |
| 4/19/2018 23:47 | 2.6  | 19.2 | 4.9 | 3   | 0.1294 | 3   |
| 4/19/2018 23:48 | 3.8  | 19.3 | 4.9 | 3   | 0.1247 | 3   |
| 4/19/2018 23:49 | 3.1  | 19.1 | 4.9 | 3.1 | 0.1368 | 3   |
| 4/19/2018 23:50 | 3.5  | 19.2 | 4.9 | 3.1 | 0.1201 | 2.9 |
| 4/19/2018 23:51 | 4.5  | 18.9 | 4.9 | 3.1 | 0.1352 | 2.8 |
| 4/19/2018 23:52 |      | 19.5 | 5   | 3.1 | 0.1179 | 2.9 |
| 4/19/2018 23:53 | 14.6 | 19.4 | 5   | 3   | 0.1336 | 2.9 |
| 4/19/2018 23:54 |      | 19.3 | 5   | 3   | 0.1253 | 2.8 |
| 4/19/2018 23:55 | 3.9  | 19   | 5   | 3   | 0.1312 | 2.7 |
| 4/19/2018 23:56 | 9.9  | 19   | 4.9 | 3   | 0.1318 | 2.8 |
| 4/19/2018 23:57 |      | 18.8 | 4.9 | 3   | 0.1189 | 2.7 |
| 4/19/2018 23:58 | 4.9  | 19.8 | 5   | 3   | 0.1335 | 2.7 |
| 4/19/2018 23:59 | 4    | 19.7 | 5.2 | 3   | 0.1259 | 2.7 |
| 4/20/2018 0:00  | 17.8 | 20.3 | 5.1 | 3   | 0.1378 | 2.7 |
| 4/20/2018 0:01  |      | 20.6 | 5.4 | 2.9 | 0.1281 | 2.7 |
| 4/20/2018 0:02  | 4.8  | 20.5 | 5.4 | 2.8 | 0.1239 | 2.7 |
| 4/20/2018 0:03  | 4.8  | 19.9 | 5.3 | 2.7 | 0.1332 | 2.6 |
| 4/20/2018 0:04  | 2.3  | 18.9 | 5   | 2.7 | 0.1167 | 2.7 |
| 4/20/2018 0:05  | 3.9  | 19.2 | 5   | 2.7 | 0.134  | 2.7 |
| 4/20/2018 0:06  | 4.1  | 19.1 | 5   | 2.7 | 0.1225 | 2.6 |
| 4/20/2018 0:07  | 4.1  | 18.8 | 5   | 2.7 | 0.1293 | 2.6 |
| 4/20/2018 0:08  | 4.7  | 19.2 | 4.9 | 2.8 | 0.1257 | 2.3 |
| 4/20/2018 0:09  | 5.1  | 18.9 | 4.9 | 2.9 | 0.1317 | 2.3 |
| 4/20/2018 0:10  | 4    | 19   | 4.9 | 2.9 | 0.1296 | 2.1 |
| 4/20/2018 0:11  | 4    | 18.9 | 4.9 | 3   | 0.125  | 2.2 |
| 4/20/2018 0:12  | 4    | 18.9 | 5   | 3.1 | 0.1374 | 2.2 |
| 4/20/2018 0:13  | 3.6  | 18.8 | 5   | 3.1 | 0.1241 | 2.1 |
| 4/20/2018 0:14  | 3.4  | 19   | 5.1 | 3.1 | 0.1374 | 2   |
| 4/20/2018 0:15  | 4.9  | 19.2 | 5.2 | 3.1 | 0.1213 | 2   |
| 4/20/2018 0:16  | 4.8  | 19   | 5.1 | 3   | 0.1316 | 2   |
| 4/20/2018 0:17  | 5.1  | 18.8 | 5.1 | 3   | 0.1266 | 2   |
| 4/20/2018 0:18  | 3.4  | 18.8 | 5   | 3   | 0.1298 | 2.1 |

|                |     |      |     |     |        |     |
|----------------|-----|------|-----|-----|--------|-----|
| 4/20/2018 0:19 | 5.2 | 18.7 | 4.9 | 3   | 0.1364 | 2.1 |
| 4/20/2018 0:20 | 4.6 | 19.2 | 5.1 | 3   | 0.1229 | 2.2 |
| 4/20/2018 0:21 | 4.7 | 19.2 | 5.6 | 3   | 0.137  | 2.2 |
| 4/20/2018 0:22 | 3.4 | 19.6 | 5.5 | 2.9 | 0.1245 | 2.1 |
| 4/20/2018 0:23 | 3.7 | 18.8 | 5.1 | 2.9 | 0.1329 | 2.2 |
| 4/20/2018 0:24 | 3.7 | 18.8 | 5   | 3   | 0.1319 | 2.3 |
| 4/20/2018 0:25 | 3.9 | 18.9 | 5.1 | 3   | 0.1216 | 2.3 |
| 4/20/2018 0:26 | 1.3 | 18.7 | 5.2 | 3   | 0.1317 | 2.3 |
| 4/20/2018 0:27 | 3.5 | 18.7 | 5.2 | 3   | 0.1249 | 2.4 |
| 4/20/2018 0:28 | 4.1 | 18.8 | 5.1 | 3   | 0.1352 | 2.4 |
| 4/20/2018 0:29 | 2.6 | 18.8 | 5.1 | 3   | 0.1246 | 2.4 |
| 4/20/2018 0:30 | 3.6 | 18.7 | 5   | 3.1 | 0.1346 | 2.4 |
| 4/20/2018 0:31 | 4   | 18.6 | 5.1 | 3.1 | 0.1234 | 2.4 |
| 4/20/2018 0:32 | 3   | 18.5 | 5.1 | 3.1 | 0.1229 | 2.4 |
| 4/20/2018 0:33 | 3   | 18.9 | 5.1 | 3.2 | 0.1293 | 2.5 |
| 4/20/2018 0:34 | 4.2 | 18.8 | 5.3 | 3.2 | 0.1169 | 2.5 |
| 4/20/2018 0:35 | 3   | 18.8 | 5.6 | 3.1 | 0.1382 | 2.5 |
| 4/20/2018 0:36 | 4.4 | 19   | 5.7 | 3.1 | 0.122  | 2.6 |
| 4/20/2018 0:37 | 4.7 | 18.7 | 5.6 | 3.1 | 0.133  | 2.5 |
| 4/20/2018 0:38 | 4.3 | 18.9 | 5.8 | 3   | 0.1236 | 2.5 |
| 4/20/2018 0:39 | 3.2 | 18.4 | 5.5 | 3   | 0.1298 | 2.3 |
| 4/20/2018 0:40 | 3.6 | 18.8 | 5.5 | 3   | 0.1303 | 2.4 |
| 4/20/2018 0:41 | 2.8 | 18.4 | 5.5 | 3   | 0.1289 | 2.4 |
| 4/20/2018 0:42 | 3.9 | 18.8 | 5.6 | 3   | 0.1383 | 2.5 |
| 4/20/2018 0:43 | 3.7 | 18.7 | 5.8 | 3   | 0.122  | 2.5 |
| 4/20/2018 0:44 | 3.8 | 18.8 | 5.8 | 3   | 0.1383 | 2.5 |
| 4/20/2018 0:45 | 3.1 | 18.6 | 5.7 | 3.1 | 0.1303 | 2.3 |
| 4/20/2018 0:46 | 2.6 | 18.6 | 5.6 | 3.1 | 0.1335 | 2.2 |
| 4/20/2018 0:47 | 4.5 | 18.5 | 5.8 | 3.1 | 0.1218 | 2.4 |
| 4/20/2018 0:48 | 4   | 18.5 | 5.7 | 3.1 | 0.1288 | 2.5 |
| 4/20/2018 0:49 | 2.4 | 18.6 | 5.5 | 3.1 | 0.1379 | 2.5 |
| 4/20/2018 0:50 | 2.9 | 18.5 | 5.6 | 3.1 | 0.1233 | 2.5 |
| 4/20/2018 0:51 | 4.4 | 18.6 | 5.5 | 3.1 | 0.149  | 2   |
| 4/20/2018 0:52 | 3.7 | 18.3 | 5.4 | 3.1 | 0.122  | 1.8 |
| 4/20/2018 0:53 | 4.7 | 18.2 | 5.5 | 3.1 | 0.1371 | 1.8 |
| 4/20/2018 0:54 | 2.9 | 18.4 | 5.6 | 3.2 | 0.1258 | 1.8 |
| 4/20/2018 0:55 | 4.1 | 18.3 | 5.5 | 3.2 | 0.1328 | 1.9 |
| 4/20/2018 0:56 | 4.4 | 18.3 | 5.6 | 3.2 | 0.1291 | 1.8 |
| 4/20/2018 0:57 | 3.8 | 18.5 | 5.8 | 3.2 | 0.1182 | 1.8 |
| 4/20/2018 0:58 | 3.2 | 18.3 | 6   | 3.2 | 0.1322 | 2   |
| 4/20/2018 0:59 | 3.9 | 18.5 | 6.1 | 3.2 | 0.1206 | 2   |
| 4/20/2018 1:00 | 4.8 | 18.5 | 6.3 | 3.1 | 0.1309 | 2   |
| 4/20/2018 1:01 | 3.2 | 18.5 | 6.1 | 3.1 | 0.1215 | 2   |
| 4/20/2018 1:02 | 3.2 | 18.3 | 6   | 3.1 | 0.1339 | 2.2 |
| 4/20/2018 1:03 | 2.9 | 18.4 | 6   | 3   | 0.1257 | 2.4 |
| 4/20/2018 1:04 | 3.6 | 18.1 | 5.7 | 3   | 0.1281 | 2.5 |
| 4/20/2018 1:05 | 2   | 18.3 | 5.6 | 3   | 0.1317 | 2.5 |

|                |     |      |     |     |        |     |
|----------------|-----|------|-----|-----|--------|-----|
| 4/20/2018 1:06 | 3.4 | 18.2 | 5.6 | 3   | 0.1198 | 2.4 |
| 4/20/2018 1:07 | 2.1 | 18.3 | 5.7 | 3.1 | 0.1388 | 2.3 |
| 4/20/2018 1:08 | 3.6 | 18.4 | 6.1 | 3.1 | 0.1222 | 1.9 |
| 4/20/2018 1:09 | 3.7 | 18.2 | 5.9 | 3.1 | 0.1392 | 1.7 |
| 4/20/2018 1:10 | 2.8 | 18   | 5.9 | 3.1 | 0.1209 | 1.6 |
| 4/20/2018 1:11 | 2.5 | 18   | 5.7 | 3.2 | 0.1339 | 1.6 |
| 4/20/2018 1:12 | 3.5 | 18.3 | 5.7 | 3.2 | 0.1305 | 1.6 |
| 4/20/2018 1:13 | 4.5 | 18.3 | 5.8 | 3.2 | 0.1224 | 1.8 |
| 4/20/2018 1:14 | 3.4 | 18.3 | 5.7 | 3.2 | 0.1373 | 1.6 |
| 4/20/2018 1:15 | 3.1 | 18.3 | 5.8 | 3.2 | 0.1286 | 1.5 |
| 4/20/2018 1:16 | 3.5 | 18.3 | 5.9 | 3.2 | 0.1339 | 1.4 |
| 4/20/2018 1:17 | 2.9 | 18.1 | 5.9 | 3.2 | 0.1267 | 1.3 |
| 4/20/2018 1:18 | 4   | 18.1 | 6   | 3.3 | 0.1385 | 1.4 |
| 4/20/2018 1:19 | 1.9 | 18.4 | 6.3 | 3.2 | 0.1358 | 1.5 |
| 4/20/2018 1:20 | 2.8 | 18.1 | 6.6 | 3.2 | 0.132  | 1.4 |
| 4/20/2018 1:21 | 1.6 | 18.2 | 6.6 | 3.2 | 0.134  | 1.4 |
| 4/20/2018 1:22 | 3   | 18.3 | 7   | 3.1 | 0.1281 | 1.3 |
| 4/20/2018 1:23 | 3.5 | 18.2 | 6.9 | 3.1 | 0.14   | 1.3 |
| 4/20/2018 1:24 | 3.9 | 18   | 6.6 | 3.1 | 0.1226 | 1.4 |
| 4/20/2018 1:25 | 3   | 18   | 6.7 | 3.1 | 0.1368 | 1.4 |
| 4/20/2018 1:26 | 3.1 | 18.2 | 6.3 | 3.1 | 0.1256 | 1.5 |
| 4/20/2018 1:27 | 2.5 | 17.8 | 6.3 | 3.1 | 0.1327 | 1.7 |
| 4/20/2018 1:28 | 2.8 | 18   | 6.5 | 3.1 | 0.133  | 1.8 |
| 4/20/2018 1:29 | 3.6 | 17.8 | 6.8 | 3.2 | 0.1277 | 1.9 |
| 4/20/2018 1:30 | 4.8 | 17.7 | 6.6 | 3.2 | 0.1419 | 1.9 |
| 4/20/2018 1:31 | 4   | 17.9 | 6.7 | 3.2 | 0.128  | 2   |
| 4/20/2018 1:32 | 2.1 | 18   | 6.5 | 3.3 | 0.1339 | 2.1 |
| 4/20/2018 1:33 | 4.5 | 18   | 6.7 | 3.3 | 0.1288 | 2   |
| 4/20/2018 1:34 | 2.7 | 17.8 | 6.6 | 3.3 | 0.1416 | 2.1 |
| 4/20/2018 1:35 | 3.1 | 18   | 6.9 | 3.3 | 0.1295 | 2.2 |
| 4/20/2018 1:36 | 3.4 | 18   | 6.7 | 3.3 | 0.1236 | 2.3 |
| 4/20/2018 1:37 | 3   | 17.7 | 6.9 | 3.3 | 0.1411 | 1.9 |
| 4/20/2018 1:38 | 2.6 | 17.9 | 7   | 3.3 | 0.1226 | 1.8 |
| 4/20/2018 1:39 | 3.6 | 17.9 | 7.2 | 3.3 | 0.1385 | 1.9 |
| 4/20/2018 1:40 | 3.2 | 17.7 | 7.2 | 3.3 | 0.129  | 2   |
| 4/20/2018 1:41 | 2.1 | 17.8 | 6.8 | 3.3 | 0.1426 | 2.1 |
| 4/20/2018 1:42 | 4.2 | 17.6 | 7   | 3.4 | 0.1379 | 2.1 |
| 4/20/2018 1:43 | 3.1 | 17.9 | 7   | 3.4 | 0.1351 | 2.2 |
| 4/20/2018 1:44 | 2.7 | 17.6 | 7.1 | 3.4 | 0.1426 | 2.2 |
| 4/20/2018 1:45 | 2.7 | 17.8 | 7.2 | 3.4 | 0.1306 | 2.2 |
| 4/20/2018 1:46 | 2.5 | 17.6 | 7.3 | 3.4 | 0.1414 | 2.2 |
| 4/20/2018 1:47 | 3.5 | 17.6 | 8.2 | 3.4 | 0.1252 | 2.2 |
| 4/20/2018 1:48 | 3.7 | 17.6 | 8.5 | 3.4 | 0.1405 | 2.3 |
| 4/20/2018 1:49 | 4   | 17.5 | 7.8 | 3.4 | 0.1245 | 2.4 |
| 4/20/2018 1:50 | 2.5 | 17.5 | 7.6 | 3.4 | 0.1361 | 2.4 |
| 4/20/2018 1:51 | 3.4 | 17.6 | 7.4 | 3.4 | 0.1335 | 2.3 |
| 4/20/2018 1:52 | 2.8 | 17.6 | 8   | 3.4 | 0.1326 | 2.3 |

|                |     |      |      |     |        |     |
|----------------|-----|------|------|-----|--------|-----|
| 4/20/2018 1:53 | 3.2 | 17.7 | 8.6  | 3.4 | 0.1421 | 2.1 |
| 4/20/2018 1:54 | 3.5 | 17.7 | 9.3  | 3.4 | 0.1327 | 2   |
| 4/20/2018 1:55 | 2.6 | 17.7 | 8.3  | 3.4 | 0.1445 | 1.9 |
| 4/20/2018 1:56 | 2.7 | 17.5 | 8    | 3.4 | 0.1286 | 1.9 |
| 4/20/2018 1:57 | 2.9 | 17.6 | 8.7  | 3.4 | 0.146  | 1.9 |
| 4/20/2018 1:58 | 3.5 | 17.7 | 8.2  | 3.5 | 0.1375 | 1.8 |
| 4/20/2018 1:59 | 2.5 | 17.7 | 8.2  | 3.5 | 0.1379 | 1.7 |
| 4/20/2018 2:00 | 2.5 | 17.5 | 7.8  | 3.4 | 0.1425 | 1.7 |
| 4/20/2018 2:01 | 2.6 | 17.7 | 8    | 3.4 | 0.1289 | 1.6 |
| 4/20/2018 2:02 | 4.3 | 17.8 | 8.1  | 3.5 | 0.146  | 1.4 |
| 4/20/2018 2:03 | 2.5 | 17.7 | 8.2  | 3.5 | 0.1331 | 1.5 |
| 4/20/2018 2:04 | 2.7 | 17.5 | 7.8  | 3.5 | 0.1398 | 1.5 |
| 4/20/2018 2:05 | 4.4 | 17.5 | 7.8  | 3.5 | 0.1417 | 1.6 |
| 4/20/2018 2:06 | 2.3 | 17.7 | 7.9  | 3.5 | 0.1336 | 1.6 |
| 4/20/2018 2:07 | 2.3 | 17.8 | 7.9  | 3.5 | 0.1443 | 1.6 |
| 4/20/2018 2:08 | 2.7 | 17.6 | 8.1  | 3.5 | 0.132  | 1.5 |
| 4/20/2018 2:09 | 2.1 | 17.5 | 8.1  | 3.5 | 0.1425 | 1.5 |
| 4/20/2018 2:10 | 2.4 | 17.9 | 8.1  | 3.6 | 0.133  | 1.5 |
| 4/20/2018 2:11 | 4.2 | 17.5 | 8.1  | 3.6 | 0.1402 | 1.5 |
| 4/20/2018 2:12 | 3   | 17.5 | 7.8  | 3.6 | 0.141  | 1.5 |
| 4/20/2018 2:13 | 4   | 17.5 | 7.9  | 3.6 | 0.1361 | 1.4 |
| 4/20/2018 2:14 | 4.2 | 17.4 | 7.9  | 3.6 | 0.1409 | 1.4 |
| 4/20/2018 2:15 | 3.4 | 18   | 7.8  | 3.6 | 0.134  | 1.4 |
| 4/20/2018 2:16 | 3.6 | 17.7 | 7.9  | 3.7 | 0.1397 | 1.4 |
| 4/20/2018 2:17 | 4.3 | 17.6 | 8.2  | 3.7 | 0.1394 | 1.3 |
| 4/20/2018 2:18 | 3.9 | 17.6 | 8    | 3.7 | 0.1423 | 1.4 |
| 4/20/2018 2:19 | 3.7 | 17.7 | 8.6  | 3.7 | 0.1573 | 1.4 |
| 4/20/2018 2:20 | 3.1 | 17.4 | 9.3  | 3.7 | 0.1442 | 1.5 |
| 4/20/2018 2:21 | 3.8 | 17.7 | 9    | 3.7 | 0.1527 | 1.5 |
| 4/20/2018 2:22 | 3.5 | 17.6 | 9.3  | 3.7 | 0.1489 | 1.5 |
| 4/20/2018 2:23 | 2.5 | 17.7 | 8.5  | 3.7 | 0.1563 | 1.4 |
| 4/20/2018 2:24 | 1.9 | 17.2 | 8.7  | 3.7 | 0.14   | 1.4 |
| 4/20/2018 2:25 | 2.7 | 17.6 | 8.5  | 3.6 | 0.1552 | 1.4 |
| 4/20/2018 2:26 | 2.5 | 17.6 | 9.1  | 3.6 | 0.1497 | 1.4 |
| 4/20/2018 2:27 | 3.9 | 17.7 | 10.3 | 3.6 | 0.162  | 1.3 |
| 4/20/2018 2:28 | 3.8 | 17.6 | 10.7 | 3.6 | 0.1662 | 1.4 |
| 4/20/2018 2:29 | 1.9 | 17.6 | 10.3 | 3.5 | 0.1583 | 1.5 |
| 4/20/2018 2:30 | 2.5 | 17.6 | 10.4 | 3.5 | 0.1693 | 1.5 |
| 4/20/2018 2:31 | 2.9 | 17.9 | 8.8  | 3.5 | 0.1489 | 1.5 |
| 4/20/2018 2:32 | 2.5 | 17.6 | 9.6  | 3.5 | 0.164  | 1.5 |
| 4/20/2018 2:33 | 3.1 | 17.4 | 8.9  | 3.5 | 0.145  | 1.5 |
| 4/20/2018 2:34 | 2.1 | 17.6 | 8.9  | 3.5 | 0.1527 | 1.4 |
| 4/20/2018 2:35 | 1.8 | 17.4 | 8.7  | 3.5 | 0.1534 | 1.4 |
| 4/20/2018 2:36 | 1.9 | 17.7 | 8.5  | 3.6 | 0.1423 | 1.4 |
| 4/20/2018 2:37 | 2.2 | 17.5 | 8.4  | 3.6 | 0.1491 | 1.4 |
| 4/20/2018 2:38 | 3.6 | 17.6 | 8.6  | 3.7 | 0.1445 | 1.5 |
| 4/20/2018 2:39 | 3.7 | 17.8 | 8.5  | 3.7 | 0.1542 | 1.5 |

|                |      |      |      |     |        |     |
|----------------|------|------|------|-----|--------|-----|
| 4/20/2018 2:40 | 3.5  | 17.4 | 8.5  | 3.7 | 0.145  | 1.6 |
| 4/20/2018 2:41 | 2.2  | 17.5 | 8.5  | 3.8 | 0.1489 | 1.7 |
| 4/20/2018 2:42 | 3.7  | 17.6 | 8.6  | 3.8 | 0.1484 | 1.7 |
| 4/20/2018 2:43 | 4.8  | 17.8 | 8.6  | 3.8 | 0.1421 | 1.7 |
| 4/20/2018 2:44 | 2.8  | 17.5 | 8.6  | 3.8 | 0.1616 | 1.8 |
| 4/20/2018 2:45 | 2.7  | 17.3 | 8.6  | 3.8 | 0.1478 | 1.9 |
| 4/20/2018 2:46 | 2.8  | 17.4 | 8.6  | 3.8 | 0.1489 | 2.1 |
| 4/20/2018 2:47 | 3.5  | 17.5 | 8.5  | 3.8 | 0.1481 | 2   |
| 4/20/2018 2:48 | 2.7  | 17.6 | 8.5  | 3.8 | 0.1565 | 2.1 |
| 4/20/2018 2:49 | 2.8  | 17.7 | 8.5  | 3.8 | 0.1578 | 2.2 |
| 4/20/2018 2:50 | 1.9  | 17.7 | 8.6  | 3.8 | 0.1459 | 2.3 |
| 4/20/2018 2:51 |      | 17.7 | 8.6  | 3.9 | 0.1543 | 2.3 |
| 4/20/2018 2:52 |      | 17.7 | 8.6  | 3.9 | 0.1378 | 2.4 |
| 4/20/2018 2:53 | 12.5 | 17.3 | 8.6  | 3.9 | 0.1628 | 2.4 |
| 4/20/2018 2:54 |      | 17.7 | 8.5  | 3.9 | 0.1466 | 2.4 |
| 4/20/2018 2:55 | 0.3  | 17.4 | 8.7  | 3.9 | 0.1492 | 2.3 |
| 4/20/2018 2:56 | 2.2  | 17.6 | 8.5  | 3.9 | 0.1621 | 2.3 |
| 4/20/2018 2:57 |      | 17.8 | 8.6  | 3.9 | 0.1384 | 2.4 |
| 4/20/2018 2:58 | 3.5  | 17.6 | 8.6  | 3.9 | 0.1505 | 2.5 |
| 4/20/2018 2:59 | 3.1  | 17.4 | 8.6  | 3.9 | 0.1426 | 2.5 |
| 4/20/2018 3:00 | 3.7  | 17.4 | 8.5  | 3.9 | 0.155  | 2.5 |
| 4/20/2018 3:01 | 2.9  | 17.5 | 8.7  | 3.9 | 0.1484 | 2.5 |
| 4/20/2018 3:02 | 2    | 17.7 | 8.6  | 3.9 | 0.148  | 2.6 |
| 4/20/2018 3:03 | 3    | 17.4 | 8.6  | 3.9 | 0.1581 | 2.6 |
| 4/20/2018 3:04 | 3.8  | 17.5 | 8.6  | 3.9 | 0.1357 | 2.5 |
| 4/20/2018 3:05 | 3.7  | 17.7 | 8.6  | 3.9 | 0.1635 | 2.5 |
| 4/20/2018 3:06 | 3.7  | 17.5 | 8.9  | 3.9 | 0.1496 | 2.5 |
| 4/20/2018 3:07 | 3.5  | 17.8 | 9    | 3.9 | 0.1549 | 2.4 |
| 4/20/2018 3:08 | 3.4  | 17.8 | 8.7  | 3.8 | 0.1392 | 2.5 |
| 4/20/2018 3:09 | 3    | 17.6 | 8.9  | 3.8 | 0.1465 | 2.5 |
| 4/20/2018 3:10 | 4    | 17.9 | 9    | 3.8 | 0.1532 | 2.4 |
| 4/20/2018 3:11 | 3.8  | 17.9 | 9.7  | 3.7 | 0.1503 | 2.4 |
| 4/20/2018 3:12 | 3.6  | 18.1 | 9.9  | 3.6 | 0.1628 | 2.3 |
| 4/20/2018 3:13 | 4.1  | 18.1 | 10.2 | 3.5 | 0.1476 | 2.3 |
| 4/20/2018 3:14 | 3.1  | 18   | 10.1 | 3.4 | 0.1546 | 2.4 |
| 4/20/2018 3:15 | 2.6  | 18.2 | 10.2 | 3.3 | 0.1511 | 2.4 |
| 4/20/2018 3:16 | 3.2  | 18.3 | 10.2 | 3.2 | 0.1568 | 2.3 |
| 4/20/2018 3:17 | 3.5  | 17.6 | 10.1 | 3.1 | 0.1571 | 2.2 |
| 4/20/2018 3:18 | 2.8  | 17.6 | 10   | 3.1 | 0.1519 | 2.4 |
| 4/20/2018 3:19 | 3.2  | 17.7 | 8.8  | 3.1 | 0.1663 | 2.3 |
| 4/20/2018 3:20 | 3    | 17.5 | 9    | 3.2 | 0.1477 | 2   |
| 4/20/2018 3:21 | 2.6  | 17.7 | 9    | 3.2 | 0.1601 | 2   |
| 4/20/2018 3:22 | 2.1  | 17.7 | 8.7  | 3.3 | 0.1503 | 2.1 |
| 4/20/2018 3:23 | 2.5  | 17.6 | 8.5  | 3.5 | 0.1578 | 2.2 |
| 4/20/2018 3:24 | 2.2  | 17.5 | 8.6  | 3.6 | 0.1534 | 2.3 |
| 4/20/2018 3:25 | 2.5  | 17.5 | 8.8  | 3.7 | 0.1497 | 2.4 |
| 4/20/2018 3:26 | 2    | 17.5 | 8.6  | 3.8 | 0.164  | 2.4 |

|                |     |      |      |     |        |     |
|----------------|-----|------|------|-----|--------|-----|
| 4/20/2018 3:27 | 3.3 | 17.6 | 8.7  | 3.9 | 0.1491 | 2.4 |
| 4/20/2018 3:28 | 3.1 | 17.4 | 8.7  | 3.9 | 0.1537 | 2.2 |
| 4/20/2018 3:29 | 2   | 17.7 | 8.9  | 4   | 0.1522 | 1.8 |
| 4/20/2018 3:30 | 4.8 | 17.7 | 8.9  | 4   | 0.1623 | 1.5 |
| 4/20/2018 3:31 | 2.5 | 17.5 | 8.9  | 4   | 0.1599 | 1.4 |
| 4/20/2018 3:32 | 4.9 | 17.5 | 8.7  | 4   | 0.1522 | 1.4 |
| 4/20/2018 3:33 | 2.6 | 17.3 | 8.6  | 4.1 | 0.1591 | 1.4 |
| 4/20/2018 3:34 | 2.9 | 17.6 | 8.8  | 4.1 | 0.1428 | 1.4 |
| 4/20/2018 3:35 | 3.2 | 17.6 | 8.8  | 4.1 | 0.1578 | 1.4 |
| 4/20/2018 3:36 | 2.4 | 17.5 | 9    | 4.1 | 0.1509 | 1.5 |
| 4/20/2018 3:37 | 1.7 | 17.6 | 8.8  | 4.1 | 0.1542 | 1.5 |
| 4/20/2018 3:38 | 3.1 | 17.3 | 9    | 4.2 | 0.1501 | 1.5 |
| 4/20/2018 3:39 | 2.6 | 17.4 | 8.8  | 4.2 | 0.1426 | 1.5 |
| 4/20/2018 3:40 | 3.6 | 17.3 | 8.9  | 4.2 | 0.1553 | 1.6 |
| 4/20/2018 3:41 | 2.6 | 17.6 | 9    | 4.2 | 0.1507 | 1.5 |
| 4/20/2018 3:42 | 2.8 | 17.4 | 9    | 4.2 | 0.1508 | 1.6 |
| 4/20/2018 3:43 | 4   | 17.4 | 9.1  | 4.3 | 0.1534 | 1.6 |
| 4/20/2018 3:44 | 3.8 | 17.2 | 9.4  | 4.3 | 0.1509 | 1.7 |
| 4/20/2018 3:45 | 2.3 | 17.3 | 9.5  | 4.2 | 0.1558 | 1.8 |
| 4/20/2018 3:46 | 1.8 | 17.3 | 9.9  | 4.2 | 0.1472 | 1.9 |
| 4/20/2018 3:47 | 2.3 | 17.5 | 9.9  | 4.2 | 0.1588 | 2   |
| 4/20/2018 3:48 | 3.1 | 17.6 | 9.9  | 4.2 | 0.1498 | 2   |
| 4/20/2018 3:49 | 2.4 | 17   | 9.9  | 4.2 | 0.1584 | 2.2 |
| 4/20/2018 3:50 | 3.7 | 17.4 | 10.7 | 4.2 | 0.1508 | 2.3 |
| 4/20/2018 3:51 | 2.2 | 17.2 | 10.9 | 4.1 | 0.1519 | 2.4 |
| 4/20/2018 3:52 | 3   | 17.4 | 11.3 | 4   | 0.1593 | 2.4 |
| 4/20/2018 3:53 | 3.6 | 17.8 | 11.3 | 4   | 0.1457 | 2.5 |
| 4/20/2018 3:54 | 3.4 | 17.5 | 11.4 | 3.9 | 0.1581 | 2.5 |
| 4/20/2018 3:55 | 2.5 | 17.5 | 11   | 3.8 | 0.144  | 2.6 |
| 4/20/2018 3:56 | 2.8 | 17.6 | 10.8 | 3.7 | 0.1553 | 2.6 |
| 4/20/2018 3:57 | 2.6 | 17.6 | 9.3  | 3.7 | 0.1542 | 2.6 |
| 4/20/2018 3:58 | 3.2 | 17.5 | 9.5  | 3.7 | 0.1447 | 2.2 |
| 4/20/2018 3:59 | 3.7 | 17.2 | 9.4  | 3.7 | 0.1602 | 1.3 |
| 4/20/2018 4:00 | 2.1 | 17.4 | 9.3  | 3.8 | 0.1498 | 1.3 |
| 4/20/2018 4:01 | 3.7 | 17.7 | 9.1  | 3.9 | 0.1468 | 1.3 |
| 4/20/2018 4:02 | 3.8 | 17.3 | 9    | 4   | 0.1491 | 1.3 |
| 4/20/2018 4:03 | 3   | 17.7 | 9    | 4.1 | 0.153  | 1.4 |
| 4/20/2018 4:04 | 2.3 | 17.5 | 9    | 4.2 | 0.1533 | 1.5 |
| 4/20/2018 4:05 | 2.5 | 17.7 | 9    | 4.2 | 0.1538 | 1.7 |
| 4/20/2018 4:06 | 1.7 | 17.6 | 8.9  | 4.2 | 0.1579 | 1.9 |
| 4/20/2018 4:07 | 3.7 | 17.4 | 8.9  | 4.2 | 0.149  | 2   |
| 4/20/2018 4:08 | 3.5 | 17.7 | 8.8  | 4.2 | 0.1561 | 2.2 |
| 4/20/2018 4:09 | 1.6 | 17.6 | 8.8  | 4.2 | 0.15   | 2.2 |
| 4/20/2018 4:10 | 3.9 | 17.4 | 8.8  | 4.2 | 0.1602 | 2.4 |
| 4/20/2018 4:11 | 3.5 | 17.8 | 8.9  | 4.3 | 0.1552 | 2.3 |
| 4/20/2018 4:12 | 3.3 | 17.4 | 8.8  | 4.3 | 0.1607 | 2.2 |
| 4/20/2018 4:13 | 2.3 | 17.6 | 8.7  | 4.3 | 0.1641 | 1.7 |



|                |     |      |     |     |        |     |
|----------------|-----|------|-----|-----|--------|-----|
| 4/20/2018 4:14 | 3.4 | 17.5 | 8.8 | 4.3 | 0.1465 | 1.7 |
| 4/20/2018 4:15 | 2.5 | 17.4 | 8.7 | 4.3 | 0.1557 | 1.9 |
| 4/20/2018 4:16 | 2.5 | 17.5 | 8.7 | 4.3 | 0.1438 | 2.1 |
| 4/20/2018 4:17 | 1.7 | 17.6 | 8.7 | 4.3 | 0.1536 | 2.2 |
| 4/20/2018 4:18 | 3.6 | 17.3 | 8.7 | 4.3 | 0.1505 | 2.3 |
| 4/20/2018 4:19 | 2.3 | 17.6 | 8.6 | 4.3 | 0.1569 | 2.4 |
| 4/20/2018 4:20 | 4   | 17.9 | 8.6 | 4.3 | 0.159  | 2.5 |
| 4/20/2018 4:21 | 3.9 | 17.6 | 8.6 | 4.3 | 0.1523 | 2.5 |
| 4/20/2018 4:22 | 4.1 | 17.4 | 8.6 | 4.3 | 0.1544 | 2.3 |
| 4/20/2018 4:23 | 2.1 | 17.6 | 8.5 | 4.3 | 0.1469 | 2.4 |
| 4/20/2018 4:24 | 3.1 | 17.5 | 8.6 | 4.3 | 0.1544 | 2.5 |
| 4/20/2018 4:25 | 1.8 | 17.8 | 8.5 | 4.3 | 0.1473 | 2.6 |
| 4/20/2018 4:26 | 2.2 | 17.6 | 8.6 | 4.2 | 0.1527 | 2.6 |
| 4/20/2018 4:27 | 2.7 | 17.5 | 8.5 | 4.2 | 0.1514 | 2.6 |
| 4/20/2018 4:28 | 3.7 | 17.3 | 8.5 | 4.2 | 0.1442 | 2.5 |
| 4/20/2018 4:29 | 2.9 | 17.7 | 8.6 | 4.2 | 0.16   | 1.6 |
| 4/20/2018 4:30 | 3.2 | 17.5 | 8.6 | 4.2 | 0.1402 | 1.5 |
| 4/20/2018 4:31 | 2.9 | 17.6 | 8.6 | 4.2 | 0.1599 | 1.6 |
| 4/20/2018 4:32 | 3.2 | 17.7 | 8.8 | 4.1 | 0.1532 | 1.7 |
| 4/20/2018 4:33 | 3.5 | 17.5 | 8.6 | 4.1 | 0.1476 | 1.6 |
| 4/20/2018 4:34 | 4.1 | 17.6 | 8.8 | 4   | 0.1474 | 1.5 |
| 4/20/2018 4:35 | 3.3 | 17.8 | 8.8 | 3.9 | 0.1388 | 1.5 |
| 4/20/2018 4:36 | 3.4 | 18   | 8.8 | 3.9 | 0.1603 | 1.5 |
| 4/20/2018 4:37 | 3   | 18   | 9.1 | 3.8 | 0.145  | 1.6 |
| 4/20/2018 4:38 | 2.7 | 17.9 | 9.3 | 3.6 | 0.1497 | 1.8 |
| 4/20/2018 4:39 | 2.9 | 17.9 | 9.3 | 3.5 | 0.1453 | 1.9 |
| 4/20/2018 4:40 | 3.2 | 18   | 9.2 | 3.4 | 0.144  | 2   |
| 4/20/2018 4:41 | 2.8 | 17.6 | 9   | 3.3 | 0.1558 | 2   |
| 4/20/2018 4:42 | 3.2 | 17.7 | 9   | 3.3 | 0.134  | 2.1 |
| 4/20/2018 4:43 | 3.2 | 17.5 | 8.4 | 3.3 | 0.15   | 2.2 |
| 4/20/2018 4:44 | 4.1 | 17.3 | 8.6 | 3.3 | 0.1399 | 2.2 |
| 4/20/2018 4:45 | 3.1 | 17.5 | 8.7 | 3.3 | 0.1466 | 2.2 |
| 4/20/2018 4:46 | 2.7 | 17.7 | 8.5 | 3.4 | 0.1581 | 2.3 |
| 4/20/2018 4:47 | 2.8 | 17.5 | 8.4 | 3.5 | 0.1408 | 2.4 |
| 4/20/2018 4:48 | 2.4 | 17.5 | 8.4 | 3.7 | 0.1541 | 2.4 |
| 4/20/2018 4:49 | 3.6 | 17.4 | 8.4 | 3.8 | 0.14   | 2.5 |
| 4/20/2018 4:50 | 4.1 | 17.4 | 8.5 | 3.9 | 0.1557 | 2.5 |
| 4/20/2018 4:51 | 3.4 | 17.2 | 8.5 | 4   | 0.146  | 2.6 |
| 4/20/2018 4:52 | 2.7 | 17.8 | 8.5 | 4   | 0.1511 | 2.6 |
| 4/20/2018 4:53 | 3.9 | 17.5 | 8.4 | 4   | 0.1536 | 2.6 |
| 4/20/2018 4:54 | 1.9 | 17.5 | 8.4 | 4.1 | 0.1449 | 2.7 |
| 4/20/2018 4:55 | 3.5 | 17.3 | 8.4 | 4.1 | 0.1565 | 2.6 |
| 4/20/2018 4:56 | 3.5 | 17.2 | 8.6 | 4.1 | 0.1446 | 2.7 |
| 4/20/2018 4:57 | 3   | 17.6 | 8.5 | 4.1 | 0.1563 | 2.6 |
| 4/20/2018 4:58 | 1.9 | 17.4 | 8.4 | 4.1 | 0.1481 | 2.7 |
| 4/20/2018 4:59 | 2.3 | 17.2 | 8.4 | 4.1 | 0.1467 | 2.6 |
| 4/20/2018 5:00 | 2.4 | 17.4 | 8.5 | 4.1 | 0.1568 | 2.6 |

|                |     |      |      |     |        |     |
|----------------|-----|------|------|-----|--------|-----|
| 4/20/2018 5:01 | 4.6 | 17.2 | 8.6  | 4.1 | 0.1328 | 2.6 |
| 4/20/2018 5:02 | 2.2 | 17.4 | 8.6  | 4.1 | 0.1564 | 2.5 |
| 4/20/2018 5:03 | 3   | 17.1 | 8.6  | 4.1 | 0.144  | 2.6 |
| 4/20/2018 5:04 | 3.2 | 17.3 | 8.6  | 4.1 | 0.1621 | 2.6 |
| 4/20/2018 5:05 | 5.4 | 17.1 | 8.5  | 4.1 | 0.1541 | 2.6 |
| 4/20/2018 5:06 | 3.6 | 17.3 | 8.6  | 4.2 | 0.1493 | 2.6 |
| 4/20/2018 5:07 | 4.5 | 17.3 | 8.7  | 4.2 | 0.1614 | 2.5 |
| 4/20/2018 5:08 | 2.5 | 17.3 | 8.7  | 4.2 | 0.1473 | 2.2 |
| 4/20/2018 5:09 | 2.5 | 17.1 | 8.9  | 4.2 | 0.1538 | 2.1 |
| 4/20/2018 5:10 | 3.8 | 17.1 | 8.9  | 4.2 | 0.1535 | 2.1 |
| 4/20/2018 5:11 | 2.5 | 17   | 8.8  | 4.2 | 0.1464 | 2.2 |
| 4/20/2018 5:12 | 3.2 | 17.2 | 9.2  | 4.2 | 0.1534 | 2.1 |
| 4/20/2018 5:13 | 3.5 | 17.1 | 9.5  | 4.2 | 0.1484 | 2.1 |
| 4/20/2018 5:14 | 1.6 | 16.9 | 9.9  | 4.2 | 0.1608 | 2.1 |
| 4/20/2018 5:15 | 2.4 | 17.3 | 9.9  | 4.2 | 0.1498 | 2.1 |
| 4/20/2018 5:16 | 2.8 | 17.1 | 9.7  | 4.3 | 0.1591 | 2.2 |
| 4/20/2018 5:17 | 2.9 | 16.9 | 10   | 4.3 | 0.164  | 2.3 |
| 4/20/2018 5:18 | 4.4 | 16.5 | 10.7 | 4.3 | 0.1581 | 2.4 |
| 4/20/2018 5:19 | 2.5 | 17.1 | 11.1 | 4.3 | 0.1693 | 2.4 |
| 4/20/2018 5:20 | 3.7 | 16.9 | 11.5 | 4.2 | 0.1446 | 2.5 |
| 4/20/2018 5:21 | 2.6 | 16.8 | 11.7 | 4.2 | 0.1621 | 2.7 |
| 4/20/2018 5:22 | 3.4 | 17   | 11.7 | 4.2 | 0.1568 | 2.7 |
| 4/20/2018 5:23 | 2.7 | 16.9 | 11.4 | 4.2 | 0.1632 | 2.7 |
| 4/20/2018 5:24 | 3.1 | 17.3 | 9.5  | 4.2 | 0.162  | 2.6 |
| 4/20/2018 5:25 | 3.1 | 17.2 | 9.5  | 4.2 | 0.15   | 2.7 |
| 4/20/2018 5:26 | 2.9 | 17   | 9.6  | 4.2 | 0.1641 | 2.6 |
| 4/20/2018 5:27 | 2.7 | 17.1 | 9.2  | 4.2 | 0.1495 | 2.7 |
| 4/20/2018 5:28 | 3.8 | 17.2 | 9    | 4.3 | 0.1617 | 2.6 |
| 4/20/2018 5:29 | 1.7 | 17.4 | 8.9  | 4.3 | 0.1584 | 2.7 |
| 4/20/2018 5:30 | 2.6 | 17.3 | 9.1  | 4.4 | 0.1471 | 2.7 |
| 4/20/2018 5:31 | 3.5 | 17.2 | 9.1  | 4.4 | 0.1592 | 2.7 |
| 4/20/2018 5:32 | 3.2 | 16.7 | 9.2  | 4.4 | 0.1538 | 2.7 |
| 4/20/2018 5:33 | 3.5 | 17.3 | 9.2  | 4.4 | 0.1622 | 2.7 |
| 4/20/2018 5:34 | 4.5 | 16.9 | 9.2  | 4.5 | 0.1539 | 2.6 |
| 4/20/2018 5:35 | 2.7 | 17.1 | 9.2  | 4.5 | 0.1503 | 2.6 |
| 4/20/2018 5:36 | 1.6 | 17.3 | 9.1  | 4.5 | 0.1599 | 2.7 |
| 4/20/2018 5:37 | 2.9 | 17.1 | 9.3  | 4.5 | 0.1436 | 2.7 |
| 4/20/2018 5:38 | 2.9 | 17.3 | 9.1  | 4.5 | 0.1601 | 2.6 |
| 4/20/2018 5:39 | 2.5 | 17.3 | 9    | 4.5 | 0.1471 | 2.7 |
| 4/20/2018 5:40 | 1.7 | 17.2 | 9.2  | 4.5 | 0.1532 | 2.7 |
| 4/20/2018 5:41 | 2.6 | 17.3 | 9.1  | 4.5 | 0.1561 | 2.5 |
| 4/20/2018 5:42 | 3.3 | 17.4 | 9.1  | 4.5 | 0.1478 | 2   |
| 4/20/2018 5:43 | 3.4 | 17.2 | 9.3  | 4.5 | 0.1684 | 2.1 |
| 4/20/2018 5:44 | 3.2 | 17.3 | 9.2  | 4.5 | 0.1542 | 2.2 |
| 4/20/2018 5:45 | 2.4 | 17.3 | 9.4  | 4.6 | 0.1591 | 2.3 |
| 4/20/2018 5:46 | 4   | 17.2 | 9.2  | 4.6 | 0.149  | 2.3 |
| 4/20/2018 5:47 | 1.7 | 17.3 | 9.4  | 4.6 | 0.1478 | 2.3 |

|                |     |      |      |     |        |     |
|----------------|-----|------|------|-----|--------|-----|
| 4/20/2018 5:48 | 2.6 | 17.1 | 9.1  | 4.6 | 0.1639 | 2.4 |
| 4/20/2018 5:49 | 2.1 | 16.9 | 9.1  | 4.6 | 0.1537 | 2.6 |
| 4/20/2018 5:50 | 2   | 17.1 | 9.1  | 4.6 | 0.1631 | 2.6 |
| 4/20/2018 5:51 | 2.8 | 17.4 | 9.3  | 4.6 | 0.1557 | 2.1 |
| 4/20/2018 5:52 | 1.8 | 17.2 | 9.4  | 4.6 | 0.1583 | 2   |
| 4/20/2018 5:53 | 3.6 | 17.3 | 9.3  | 4.6 | 0.1621 | 2.3 |
| 4/20/2018 5:54 | 2.6 | 17.1 | 9.7  | 4.6 | 0.1496 | 2.5 |
| 4/20/2018 5:55 | 2.4 | 17.2 | 10   | 4.6 | 0.1623 | 2.6 |
| 4/20/2018 5:56 | 3.1 | 17   | 10.2 | 4.6 | 0.1538 | 2.1 |
| 4/20/2018 5:57 | 3.4 | 16.9 | 10.6 | 4.6 | 0.1608 | 1.9 |
| 4/20/2018 5:58 | 2.6 | 17.2 | 10.6 | 4.5 | 0.1623 | 2.3 |
| 4/20/2018 5:59 | 2.8 | 17.1 | 10.1 | 4.5 | 0.1519 | 2.4 |
| 4/20/2018 6:00 | 3.4 | 17   | 10.6 | 4.5 | 0.1742 | 2.5 |
| 4/20/2018 6:01 | 2.4 | 16.9 | 10.7 | 4.5 | 0.1594 | 2.6 |
| 4/20/2018 6:02 |     | 16.9 | 11.7 | 4.6 | 0.1691 | 2.6 |
| 4/20/2018 6:03 |     | 16.8 | 12.2 | 4.6 | 0.1603 | 2.7 |
| 4/20/2018 6:04 | 3.6 | 16.8 | 12.6 | 4.6 | 0.1745 | 2.7 |
| 4/20/2018 6:05 |     | 17   | 12.5 | 4.7 | 0.1712 | 2.7 |
| 4/20/2018 6:06 | 3.1 | 16.9 | 12.3 | 4.8 | 0.1634 | 2.8 |
| 4/20/2018 6:07 | 3.2 | 17.1 | 10.1 | 4.9 | 0.1668 | 2.8 |
| 4/20/2018 6:08 |     | 17.1 | 10.1 | 4.9 | 0.1588 | 2.8 |
| 4/20/2018 6:09 | 4.5 | 17.2 | 10   | 5   | 0.1678 | 2.8 |
| 4/20/2018 6:10 |     | 17   | 9.8  | 5   | 0.1597 | 2.8 |
| 4/20/2018 6:11 | 3.1 | 17.3 | 9.8  | 5.1 | 0.1687 | 2.8 |
| 4/20/2018 6:12 |     | 17.1 | 9.9  | 5.1 | 0.1647 | 2.8 |
| 4/20/2018 6:13 |     | 17.3 | 9.7  | 5.2 | 0.1568 | 2.8 |
| 4/20/2018 6:14 |     | 17.3 | 9.8  | 5.2 | 0.1649 | 2.9 |
| 4/20/2018 6:15 | 3.2 | 17.1 | 9.7  | 5.2 | 0.1596 | 3   |
| 4/20/2018 6:16 | 3.1 | 16.9 | 9.7  | 5.3 | 0.1646 | 2.8 |
| 4/20/2018 6:17 | 3.1 | 17.1 | 9.7  | 5.4 | 0.1713 | 2.6 |
| 4/20/2018 6:18 | 2.8 | 17   | 9.7  | 5.5 | 0.1554 | 2.7 |
| 4/20/2018 6:19 | 2.7 | 17   | 9.8  | 5.5 | 0.1699 | 2.8 |
| 4/20/2018 6:20 | 2.5 | 17.2 | 9.7  | 5.6 | 0.1516 | 2.9 |
| 4/20/2018 6:21 | 2.1 | 17.2 | 9.8  | 5.7 | 0.1692 | 3   |
| 4/20/2018 6:22 | 2.7 | 17.2 | 9.7  | 5.8 | 0.1655 | 2.9 |
| 4/20/2018 6:23 | 2.5 | 16.8 | 9.9  | 5.9 | 0.1641 | 2.9 |
| 4/20/2018 6:24 | 3.2 | 17.1 | 9.8  | 6   | 0.1695 | 2.8 |
| 4/20/2018 6:25 | 2.8 | 17.1 | 9.9  | 6.1 | 0.1568 | 2.9 |
| 4/20/2018 6:26 | 3.9 | 17   | 9.8  | 6.2 | 0.1732 | 2.8 |
| 4/20/2018 6:27 | 3.1 | 17.1 | 9.8  | 6.3 | 0.1575 | 2.8 |
| 4/20/2018 6:28 | 3   | 17.1 | 9.9  | 6.4 | 0.1698 | 2.8 |
| 4/20/2018 6:29 | 2.6 | 16.9 | 9.9  | 6.4 | 0.1645 | 2.8 |
| 4/20/2018 6:30 | 2.9 | 17.2 | 9.9  | 6.5 | 0.1621 | 2.8 |
| 4/20/2018 6:31 | 2.2 | 17   | 9.8  | 6.6 | 0.1709 | 2.8 |
| 4/20/2018 6:32 | 2.9 | 16.9 | 9.8  | 6.6 | 0.1561 | 2.9 |
| 4/20/2018 6:33 | 1.9 | 17.4 | 9.8  | 6.7 | 0.1786 | 2.9 |
| 4/20/2018 6:34 | 1.5 | 17.5 | 9.7  | 6.7 | 0.1759 | 2.9 |

|                |     |      |      |     |        |     |
|----------------|-----|------|------|-----|--------|-----|
| 4/20/2018 6:35 | 1.7 | 17.4 | 9.8  | 6.8 | 0.159  | 2.8 |
| 4/20/2018 6:36 | 3.5 | 16.9 | 9.9  | 6.9 | 0.1823 | 2.6 |
| 4/20/2018 6:37 | 0.9 | 17.2 | 9.9  | 6.9 | 0.1629 | 2.7 |
| 4/20/2018 6:38 | 3.8 | 17   | 9.9  | 7   | 0.1747 | 2.8 |
| 4/20/2018 6:39 | 2.5 | 17.2 | 9.8  | 7   | 0.1635 | 2.8 |
| 4/20/2018 6:40 | 2.4 | 17.1 | 10.1 | 7.2 | 0.1654 | 2.8 |
| 4/20/2018 6:41 | 2.4 | 16.9 | 10.1 | 7.3 | 0.1671 | 2.8 |
| 4/20/2018 6:42 | 3.5 | 17   | 10.5 | 7.4 | 0.1573 | 2.9 |
| 4/20/2018 6:43 | 3.8 | 17   | 10.9 | 7.6 | 0.1606 | 2.9 |
| 4/20/2018 6:44 | 4.7 | 17.1 | 11   | 7.7 | 0.155  | 2.9 |
| 4/20/2018 6:45 | 2.8 | 16.8 | 11.2 | 7.9 | 0.1766 | 3   |
| 4/20/2018 6:46 | 3.6 | 17.2 | 10.5 | 8.1 | 0.1651 | 3   |
| 4/20/2018 6:47 | 2.3 | 17.1 | 10.7 | 8.2 | 0.1634 | 3   |
| 4/20/2018 6:48 | 3.5 | 17   | 10.7 | 8.3 | 0.1732 | 2.8 |
| 4/20/2018 6:49 | 3.6 | 16.9 | 11.7 | 8.5 | 0.1693 | 2.7 |
| 4/20/2018 6:50 | 2.9 | 17.2 | 11.6 | 8.7 | 0.1845 | 2.7 |
| 4/20/2018 6:51 | 2.1 | 16.6 | 11.6 | 8.9 | 0.1635 | 2.7 |
| 4/20/2018 6:52 | 3.8 | 17   | 11.6 | 9.1 | 0.1827 | 2.7 |
| 4/20/2018 6:53 | 2.6 | 16.9 | 11.6 | 9.2 | 0.1759 | 2.7 |
| 4/20/2018 6:54 | 2.3 | 17   | 10.8 | 9.3 | 0.1648 | 2.9 |
| 4/20/2018 6:55 | 2.6 | 17   | 10.7 | 9.4 | 0.1727 | 2.7 |
| 4/20/2018 6:56 | 2.9 | 17.3 | 10.3 | 9.4 | 0.1621 | 2.8 |
| 4/20/2018 6:57 | 3.4 | 17.2 | 10.2 | 9.3 | 0.1713 | 2.8 |
| 4/20/2018 6:58 | 1.6 | 16.9 | 10.2 | 9.2 | 0.1728 | 2.7 |
| 4/20/2018 6:59 | 3   | 17.1 | 10.2 | 9.1 | 0.1627 | 2.6 |
| 4/20/2018 7:00 | 4   | 17.2 | 10.2 | 8.9 | 0.174  | 2.5 |
| 4/20/2018 7:01 | 5.1 | 17.2 | 10   | 8.7 | 0.1581 | 2.5 |
| 4/20/2018 7:02 | 3.2 | 17.1 | 10   | 8.7 | 0.1764 | 2.4 |
| 4/20/2018 7:03 | 3.8 | 17.3 | 10   | 8.6 | 0.1594 | 2.3 |
| 4/20/2018 7:04 | 1.7 | 17.1 | 10   | 8.6 | 0.1811 | 2.2 |
| 4/20/2018 7:05 | 2.8 | 17   | 9.9  | 8.6 | 0.1736 | 1.8 |
| 4/20/2018 7:06 | 3.7 | 17.4 | 10   | 8.7 | 0.1632 | 1.6 |
| 4/20/2018 7:07 | 1.7 | 17.2 | 10.1 | 8.7 | 0.1779 | 1.7 |
| 4/20/2018 7:08 | 3   | 17   | 10   | 8.7 | 0.1642 | 1.8 |
| 4/20/2018 7:09 | 2.9 | 17.3 | 10   | 8.8 | 0.1793 | 2   |
| 4/20/2018 7:10 | 3.4 | 17.1 | 10.1 | 8.8 | 0.1735 | 2.1 |
| 4/20/2018 7:11 | 3.5 | 17   | 10   | 8.8 | 0.1712 | 2.2 |
| 4/20/2018 7:12 | 3.2 | 17.3 | 10.2 | 8.9 | 0.1764 | 2.3 |
| 4/20/2018 7:13 | 2.9 | 17.3 | 10.1 | 8.9 | 0.1677 | 2.3 |
| 4/20/2018 7:14 | 2.5 | 17.3 | 10.1 | 8.9 | 0.1862 | 2.3 |
| 4/20/2018 7:15 | 2.1 | 17.3 | 10.1 | 9   | 0.1678 | 2.2 |
| 4/20/2018 7:16 | 4.3 | 17.3 | 10   | 9   | 0.1824 | 2.3 |
| 4/20/2018 7:17 | 3.1 | 17.2 | 10.2 | 9   | 0.1741 | 2.4 |
| 4/20/2018 7:18 | 3   | 17.1 | 10.2 | 9.1 | 0.1779 | 2.4 |
| 4/20/2018 7:19 | 2.8 | 17.1 | 10.2 | 9.1 | 0.1877 | 2.4 |
| 4/20/2018 7:20 | 3.1 | 17   | 10.5 | 9.1 | 0.1704 | 2.6 |
| 4/20/2018 7:21 | 0.9 | 17.1 | 10.6 | 9.2 | 0.1854 | 2.6 |

|                |     |      |     |      |      |      |         |     |
|----------------|-----|------|-----|------|------|------|---------|-----|
| 4/20/2018 7:22 |     |      | 4.1 | 17.2 | 10.8 | 9.2  | 0.1747  | 2.6 |
| 4/20/2018 7:23 |     |      | 2.1 | 16.8 | 10.5 | 9.2  | 0.1834  | 2.5 |
| 4/20/2018 7:24 |     |      | 3.1 | 17.1 | 11.1 | 9.2  | 0.1821  | 2.6 |
| 4/20/2018 7:25 | 0.2 | -2.2 | 2.5 | 17.2 | 11.6 | 9.2  | 0.1862  | 2.4 |
| 4/20/2018 7:26 | 0.3 | -1.3 | 3.8 | 17.1 | 10.6 | 9.2  | 0.1816  | 1.7 |
| 4/20/2018 7:27 | 0.3 | -0.7 | 3.6 | 17.4 | 10.5 | 9.2  | 0.2031  | 1.4 |
| 4/20/2018 7:28 | 0.3 | -0.1 | 3.2 | 17.3 | 10.4 | 9.2  | 0.825   | 1.4 |
| 4/20/2018 7:29 | 0.3 | -0.1 | 2.6 | 17.1 | 10.3 | 9.2  | 1.8438  | 1.4 |
| 4/20/2018 7:30 | 0.3 | -0.3 | 3.7 | 17.2 | 10.1 | 9.2  | -0.0324 | 1.5 |
| 4/20/2018 7:31 | 0.3 | -0.2 | 3.1 | 17.2 | 10.1 | 9.3  | -0.0347 | 1.5 |
| 4/20/2018 7:32 | 0.3 | -0.2 | 4.5 | 17.1 | 10.1 | 9.3  | -0.0528 | 1.4 |
| 4/20/2018 7:33 | 0.3 | -0.1 | 3.3 | 17.2 | 10.1 | 9.3  | -0.0404 | 1.4 |
| 4/20/2018 7:34 | 0.3 | -0.4 | 2.6 | 17.6 | 10.2 | 9.3  | -0.0547 | 1.4 |
| 4/20/2018 7:35 | 0.3 | 0.3  | 2.6 | 16.9 | 10.2 | 9.3  | -0.0392 | 1.5 |
| 4/20/2018 7:36 | 0.3 | 0.3  | 2.6 | 17.2 | 10.2 | 9.3  | 0.0072  | 1.5 |
| 4/20/2018 7:37 | 0.3 | -0.6 | 3.2 | 17.1 | 10.2 | 9.3  |         | 1.4 |
| 4/20/2018 7:38 | 0.3 | -0.3 | 2.6 | 17   | 10.2 | 9.3  |         | 1.4 |
| 4/20/2018 7:39 | 0.2 | 0.4  | 2   | 17   | 10.3 | 9.3  |         | 1.4 |
| 4/20/2018 7:40 | 0.2 | 0.7  | 3.6 | 17.2 | 10.2 | 9.3  |         | 1.4 |
| 4/20/2018 7:41 | 0.2 | -0.3 | 2.5 | 17.1 | 10.3 | 9.3  |         | 1.4 |
| 4/20/2018 7:42 | 0.2 | -0.1 | 2.1 | 17.4 | 10.1 | 9.4  |         | 1.4 |
| 4/20/2018 7:43 | 0.2 | -0.3 | 4.1 | 17   | 10.1 | 9.4  |         | 1.4 |
| 4/20/2018 7:44 | 0.2 | 0.5  | 3.5 | 17.2 | 10.2 | 9.5  |         | 1.4 |
| 4/20/2018 7:45 | 0.1 | 0.7  | 2.7 | 17.2 | 10.2 | 9.5  |         | 1.4 |
| 4/20/2018 7:46 | 0.2 | 0.6  | 2   | 17.2 | 10.2 | 9.5  |         | 1.4 |
| 4/20/2018 7:47 | 0.2 | 0.3  | 3.9 | 17.3 | 10.4 | 9.5  |         | 1.4 |
| 4/20/2018 7:48 | 0.2 | 0    | 3.1 | 17.3 | 10.4 | 9.6  |         | 1.4 |
| 4/20/2018 7:49 | 0.2 | 1.1  | 3.6 | 17.1 | 10.7 | 9.6  | 1.3452  | 1.5 |
| 4/20/2018 7:50 | 0.2 | -0.2 | 3.4 | 19   | 10.9 | 9.6  | 0.2413  | 1.4 |
| 4/20/2018 7:51 | 0.2 | 0.2  | 2.2 | 16.2 | 10.4 | 9.6  | 0.2383  | 1.4 |
| 4/20/2018 7:52 | 0.2 | 0.3  | 1.8 | 16.5 | 10.4 | 9.6  | 0.2374  | 1.4 |
| 4/20/2018 7:53 | 0.2 | -0.1 | 1   | 17.2 | 10.5 | 9.6  | 0.28    | 1.1 |
| 4/20/2018 7:54 | 0.2 | -0.2 | 2   | 17.2 | 10.3 | 9.7  | 0.3073  | 0.1 |
| 4/20/2018 7:55 | 0.2 | 0.6  | 2.9 | 17   | 10.3 | 9.7  | 0.2978  | 0.6 |
| 4/20/2018 7:56 | 0.2 | -0.2 | 3.2 | 17.5 | 12   | 17.5 | 0.324   | 1.5 |
| 4/20/2018 7:57 | 0.2 | 0.2  | 3.4 | 20.3 | 16.2 | 30.9 | 0.4619  | 1.5 |
| 4/20/2018 7:58 | 0.2 | 0.5  | 3   | 25.2 | 20.3 | 31.8 | 0.8331  | 1.5 |
| 4/20/2018 7:59 | 0.2 | 0.1  | 4.3 | 26.8 | 22.5 | 36.4 | 1.2143  | 1.6 |
| 4/20/2018 8:00 | 0.2 | 0.3  | 3.3 | 24.4 | 20.7 | 35.3 | 1.1302  | 1.6 |
| 4/20/2018 8:01 | 0.2 | 0    | 2.1 | 23.2 | 19.7 | 34   | 0.956   | 1.5 |
| 4/20/2018 8:02 | 0.2 | 0.4  | 2.7 | 23.3 | 19.7 | 34.2 | 0.9427  | 1.5 |
| 4/20/2018 8:03 | 0.3 | 1.1  | 3.5 | 22.7 | 19.3 | 34.2 | 0.8833  | 1.5 |
| 4/20/2018 8:04 | 0.2 | 0.4  | 2.9 | 22.5 | 19   | 34.1 | 0.8738  | 1.5 |
| 4/20/2018 8:05 | 0.2 | 0.6  | 3.1 | 22.1 | 18.7 | 34   | 0.8263  | 1.5 |
| 4/20/2018 8:06 | 0.2 | 0.4  | 2.2 | 22.3 | 18.8 | 33.9 | 0.8414  | 1.5 |
| 4/20/2018 8:07 | 0.1 | 0.3  | 4   | 21.9 | 18.7 | 33.8 | 0.8385  | 1.5 |
| 4/20/2018 8:08 | 0.1 | 0.5  | 4   | 21.7 | 18.2 | 33.5 | 0.7881  | 1.6 |

|                |     |      |     |      |      |      |        |     |
|----------------|-----|------|-----|------|------|------|--------|-----|
| 4/20/2018 8:09 | 0.1 | 0.5  | 3.9 | 21.3 | 17.9 | 33.3 | 0.7948 | 1.5 |
| 4/20/2018 8:10 | 0.2 | 0.8  | 2.4 | 21.6 | 17.8 | 32.8 | 0.7789 | 1.5 |
| 4/20/2018 8:11 | 0.2 | 0.2  | 3.4 | 21.3 | 17.8 | 32.5 | 0.7801 | 1.5 |
| 4/20/2018 8:12 | 0.2 | 0.2  | 2.5 | 20.9 | 17.6 | 32.2 | 0.7607 | 1.5 |
| 4/20/2018 8:13 | 0.2 | 0.3  | 3.6 | 20.2 | 16.9 | 31.7 | 0.7169 | 1.5 |
| 4/20/2018 8:14 | 0.1 | -0.1 | 3.7 | 20   | 16.6 | 31.2 | 0.7121 | 1.5 |
| 4/20/2018 8:15 | 0.1 | 0.3  | 3.2 | 20   | 16.6 | 30.7 | 0.6914 | 1.5 |
| 4/20/2018 8:16 | 0.1 | 1    | 3.8 | 20.9 | 17.3 | 30.4 | 0.768  | 1.5 |
| 4/20/2018 8:17 | 0.1 | 0.3  | 2.9 | 20.7 | 17.2 | 30.3 | 0.7536 | 1.5 |
| 4/20/2018 8:18 | 0.2 | 0.1  | 2.7 | 20.9 | 17.2 | 30.3 | 0.7666 | 1.6 |
| 4/20/2018 8:19 | 0.2 | -0.1 | 3.3 | 20.9 | 17.2 | 30.2 | 0.7718 | 1.6 |
| 4/20/2018 8:20 | 0.2 | 0.6  | 3.5 | 20.4 | 17   | 30.1 | 0.7411 | 1.5 |
| 4/20/2018 8:21 | 0.2 | -0.3 | 3.3 | 20.3 | 16.8 | 30.1 | 0.7393 | 1.5 |
| 4/20/2018 8:22 | 0.2 | 0.3  | 2.9 | 20.3 | 16.7 | 30.3 | 0.7335 | 1.5 |
| 4/20/2018 8:23 | 0.2 | 0.1  | 4.1 | 19.8 | 16.6 | 30.4 | 0.7412 | 1.5 |
| 4/20/2018 8:24 | 0.2 | 0.1  | 3   | 19.9 | 16.2 | 30.4 | 0.7101 | 1.6 |
| 4/20/2018 8:25 | 0.2 | 1    | 2.8 | 19.8 | 15.9 | 30.1 | 0.6939 | 1.6 |
| 4/20/2018 8:26 | 0.2 | 0.3  | 3.2 | 19.6 | 16   | 29.9 | 0.6925 | 1.7 |
| 4/20/2018 8:27 | 0.2 | 0.8  | 3.2 | 19.1 | 15.9 | 29.6 | 0.6633 | 1.7 |
| 4/20/2018 8:28 | 0.2 | 0.3  | 4.3 | 19.5 | 15.9 | 29.3 | 0.691  | 1.7 |
| 4/20/2018 8:29 | 0.2 | 0.4  | 4.7 | 19.2 | 15.7 | 29   | 0.6655 | 1.7 |
| 4/20/2018 8:30 | 0.2 | 0.5  | 2.8 | 19.5 | 15.7 | 28.8 | 0.685  | 1.7 |
| 4/20/2018 8:31 | 0.2 | 0.2  | 2   | 19.4 | 15.6 | 28.6 | 0.6796 | 1.9 |
| 4/20/2018 8:32 | 0.2 | -0.1 | 4.1 | 19.3 | 15.5 | 28.4 | 0.6769 | 1.9 |
| 4/20/2018 8:33 | 0.2 | 0.6  | 3.4 | 19.5 | 15.4 | 28.2 | 0.6826 | 1.7 |
| 4/20/2018 8:34 | 0.2 | -0.1 | 3.9 | 19.5 | 15.4 | 28.2 | 0.6749 | 1.8 |
| 4/20/2018 8:35 | 0.2 | 0    | 4.5 | 19.2 | 15.4 | 28.1 | 0.6853 | 2   |
| 4/20/2018 8:36 | 0.2 | 0    | 3.6 | 19.3 | 15.2 | 28.1 | 0.667  | 2   |
| 4/20/2018 8:37 | 0.1 | 0.9  | 3.3 | 19.1 | 15.1 | 28.1 | 0.6731 | 1.6 |
| 4/20/2018 8:38 | 0.2 | 0.2  | 3.2 | 19.1 | 15.1 | 28   | 0.6699 | 1.5 |
| 4/20/2018 8:39 | 0.2 | 0.1  | 3   | 18.9 | 15   | 28   | 0.6622 | 1.5 |
| 4/20/2018 8:40 | 0.2 | 0.5  | 3.5 | 18.8 | 15   | 27.9 | 0.6651 | 1.5 |
| 4/20/2018 8:41 | 0.2 | 0.7  | 3.4 | 19.1 | 14.9 | 27.8 | 0.651  | 1.5 |
| 4/20/2018 8:42 | 0.2 | 0.5  | 3.3 | 18.9 | 14.8 | 27.8 | 0.6642 | 1.5 |
| 4/20/2018 8:43 | 0.2 | -0.2 | 2.2 | 19   | 14.8 | 27.7 | 0.6494 | 1.6 |
| 4/20/2018 8:44 | 0.2 | 0.9  | 2.4 | 18.8 | 14.8 | 27.7 | 0.6632 | 1.6 |
| 4/20/2018 8:45 | 0.2 | 0.4  | 2.7 | 18.8 | 14.7 | 27.6 | 0.6499 | 1.6 |
| 4/20/2018 8:46 | 0.2 | 0.8  | 3.9 | 18.9 | 14.7 | 27.5 | 0.6534 | 1.6 |
| 4/20/2018 8:47 | 0.2 | 0.5  | 1.8 | 18.9 | 14.6 | 27.5 | 0.6653 | 1.6 |
| 4/20/2018 8:48 | 0.2 | 0.3  | 1.1 | 18.6 | 14.6 | 27.4 | 0.6337 | 1.6 |
| 4/20/2018 8:49 | 0.2 | -0.2 | 4.3 | 18.6 | 14.5 | 27.4 | 0.6452 | 1.6 |
| 4/20/2018 8:50 | 0.1 | 0.9  | 3.6 | 18.8 | 14.4 | 27.4 | 0.6327 | 1.6 |
| 4/20/2018 8:51 | 0.1 | -0.1 | 3.3 | 18.6 | 14.3 | 27.3 | 0.6362 | 1.7 |
| 4/20/2018 8:52 | 0.2 | 0.2  | 2.4 | 18.3 | 14.3 | 27   | 0.6248 | 1.7 |
| 4/20/2018 8:53 | 0.2 | 0.1  | 2   | 18.4 | 14.3 | 26.9 | 0.6011 | 1.6 |
| 4/20/2018 8:54 | 0.2 | 0.4  | 3.4 | 18.1 | 14.3 | 26.7 | 0.6078 | 1.6 |
| 4/20/2018 8:55 | 0.2 | 0.6  | 3.1 | 18.5 | 14.2 | 26.5 | 0.5886 | 1.6 |

|                |     |      |     |      |      |      |        |     |
|----------------|-----|------|-----|------|------|------|--------|-----|
| 4/20/2018 8:56 | 0.2 | 0.7  | 2.9 | 18.3 | 14.2 | 26.3 | 0.597  | 1.6 |
| 4/20/2018 8:57 | 0.1 | 0.1  | 3.2 | 18.5 | 14.1 | 26.2 | 0.605  | 1.7 |
| 4/20/2018 8:58 | 0.2 | 0.3  | 3.4 | 18.3 | 14   | 26   | 0.6072 | 1.9 |
| 4/20/2018 8:59 | 0.2 | 0.2  |     | 18   | 14   | 25.8 | 0.5891 | 2   |
| 4/20/2018 9:00 | 0.2 | 0.3  |     | 18.5 | 13.9 | 25.7 | 0.5953 | 2   |
| 4/20/2018 9:01 | 0.2 | 0.3  |     | 18.1 | 13.9 | 25.6 | 0.6127 | 1.9 |
| 4/20/2018 9:02 | 0.2 | -0.2 | 2   | 18.2 | 13.8 | 25.6 | 0.5927 | 2   |
| 4/20/2018 9:03 | 0.2 | -0.2 | 3.3 | 18.2 | 13.7 | 25.6 | 0.599  | 1.9 |
| 4/20/2018 9:04 | 0.2 | 0    |     | 18.2 | 13.7 | 25.5 | 0.5919 | 2   |
| 4/20/2018 9:05 | 0.2 | 0.2  |     | 18.5 | 13.7 | 25.4 | 0.5887 | 2   |
| 4/20/2018 9:06 | 0.2 | 0.7  | 2.2 | 18.2 | 13.7 | 25.3 | 0.5927 | 2   |
| 4/20/2018 9:07 | 0.2 | 0.8  | 3.9 | 18.2 | 13.7 | 25.2 | 0.5821 | 2   |
| 4/20/2018 9:08 | 0.2 | 0.1  |     | 17.6 | 14.8 | 24.9 | 0.534  | 2   |
| 4/20/2018 9:09 | 0.4 | 0.2  | 3.8 | 17.5 | 16.1 | 24.1 | 0.4894 | 2.2 |
| 4/20/2018 9:10 | 0.5 | 0.8  | 4.5 | 17.5 | 16.8 | 23.1 | 0.4588 | 1.9 |
| 4/20/2018 9:11 | 0.6 | 0.7  | 3.8 | 17.8 | 16.5 | 22.1 | 0.4597 | 2   |
| 4/20/2018 9:12 | 0.7 | 0.8  | 2.8 | 17.4 | 17.1 | 21   | 0.4413 | 2.2 |
| 4/20/2018 9:13 | 0.8 | 0.7  | 2.6 | 17.5 | 17.1 | 19.9 | 0.4471 | 2.3 |
| 4/20/2018 9:14 | 0.8 | 0.8  | 3.1 | 17.4 | 17.2 | 18.7 | 0.4199 | 2.4 |
| 4/20/2018 9:15 | 0.8 | 1.4  | 2.4 | 17.6 | 17.7 | 17.5 | 0.4169 | 2.4 |
| 4/20/2018 9:16 | 0.9 | 1.1  | 3.1 | 17.4 | 17.9 | 16.2 | 0.398  | 2.4 |
| 4/20/2018 9:17 | 0.9 | 1.2  | 2.9 | 17.2 | 18   | 15.4 | 0.4127 | 2.4 |
| 4/20/2018 9:18 | 0.8 | 0.9  | 2.4 | 17.4 | 18   | 14.9 | 0.4033 | 2.5 |
| 4/20/2018 9:19 | 0.9 | 1    | 3.3 | 17.6 | 18.3 | 14.3 | 0.3753 | 2.5 |
| 4/20/2018 9:20 | 1.1 | 1.3  | 2.2 | 17.5 | 18.7 | 13.5 | 0.3652 | 2.5 |
| 4/20/2018 9:21 | 1.4 | 1.7  | 2   | 17.6 | 18.9 | 12.8 | 0.3511 | 2.6 |
| 4/20/2018 9:22 | 1.5 | 2.1  | 3.8 | 18   | 18.9 | 12   | 0.3606 | 2.6 |
| 4/20/2018 9:23 | 1.5 | 2.1  | 3.2 | 17.7 | 18.9 | 11.4 | 0.3457 | 2.6 |
| 4/20/2018 9:24 | 1.5 | 1.4  | 1   | 17.4 | 18.9 | 10.8 | 0.3633 | 2.5 |
| 4/20/2018 9:25 | 1.3 | 1.1  | 2.7 | 17   | 18.8 | 10.5 | 0.3699 | 2.5 |
| 4/20/2018 9:26 | 1   | 1.4  | 1.8 | 17.2 | 18.8 | 10.1 | 0.3598 | 2.5 |
| 4/20/2018 9:27 | 0.8 | 0.5  | 2.8 | 16.9 | 18.8 | 9.8  | 0.3762 | 2.4 |
| 4/20/2018 9:28 | 0.7 | 0.8  | 2.8 | 19.2 | 22.9 | 18.4 | 0.4164 | 2.4 |
| 4/20/2018 9:29 | 0.6 | 1    | 3.3 | 25.8 | 30.3 | 36.9 | 0.6755 | 2.5 |
| 4/20/2018 9:30 | 0.5 | 0.6  | 3.3 | 33   | 33.5 | 46.2 | 0.918  | 2.6 |
| 4/20/2018 9:31 | 0.4 | 0.4  | 3.6 | 38.2 | 35.7 | 53.2 | 1.394  | 2.7 |
| 4/20/2018 9:32 | 0.4 | 0.6  | 4.2 | 39.4 | 37   | 53.2 | 1.7435 | 2.8 |
| 4/20/2018 9:33 | 0.4 | 0.4  | 3.8 | 40.8 | 38.2 | 60.4 | 1.9548 | 2.9 |
| 4/20/2018 9:34 | 0.4 | 0.2  | 3.7 | 39.6 | 37.1 | 60.6 | 1.9565 | 2.9 |
| 4/20/2018 9:35 | 0.4 | 0.2  | 5   | 40.4 | 37.1 | 60.1 | 1.9659 | 3   |
| 4/20/2018 9:36 | 0.4 | 0.8  | 3.4 | 38.5 | 36.7 | 59.7 | 1.9612 | 3   |
| 4/20/2018 9:37 | 0.4 | 0.9  | 2.9 | 37.6 | 35.8 | 59.1 | 1.9099 | 3   |
| 4/20/2018 9:38 | 0.3 | 0.4  | 4   | 37   | 34.9 | 58.2 | 1.8505 | 2.8 |
| 4/20/2018 9:39 | 0.3 | 0.5  | 3.5 | 36.6 | 34.9 | 57.7 | 1.9133 | 2.7 |
| 4/20/2018 9:40 | 0.2 | 0.2  | 3   | 37.4 | 35.6 | 57.1 | 1.9276 | 2.6 |
| 4/20/2018 9:41 | 0.2 | 0.1  | 3.7 | 36.8 | 35.1 | 56.4 | 1.8918 | 2.6 |
| 4/20/2018 9:42 | 0.2 | 1.2  | 2.8 | 35.1 | 34.1 | 56   | 1.8114 | 2.8 |

|                 |     |      |     |      |      |      |        |     |
|-----------------|-----|------|-----|------|------|------|--------|-----|
| 4/20/2018 9:43  | 0.2 | 0.1  | 2.7 | 35.8 | 33.7 | 55.7 | 1.8264 | 2.8 |
| 4/20/2018 9:44  | 0.2 | 0.1  | 4.5 | 34.9 | 33.6 | 55.3 | 1.7912 | 2.7 |
| 4/20/2018 9:45  | 0.2 | 0.7  | 3.8 | 34.1 | 32.9 | 54.7 | 1.7638 | 2.7 |
| 4/20/2018 9:46  | 0.2 | 0.6  | 5.6 | 34.1 | 32.6 | 54.7 | 1.7562 | 1.8 |
| 4/20/2018 9:47  | 0.2 | 0.5  | 3.6 | 33.8 | 33   | 54.4 | 1.7958 | 1.7 |
| 4/20/2018 9:48  | 0.1 | 0.6  | 4.7 | 33.7 | 32.8 | 54   | 1.796  | 1.9 |
| 4/20/2018 9:49  | 0.1 | 0.4  | 5.3 | 33.4 | 32.1 | 53.6 | 1.7469 | 2   |
| 4/20/2018 9:50  | 0.2 | -0.3 | 3.8 | 33.6 | 32.5 | 53.5 | 1.796  | 2.4 |
| 4/20/2018 9:51  | 0.2 | 0.8  | 4   | 33.6 | 32.3 | 53.6 | 1.7793 | 2.5 |
| 4/20/2018 9:52  | 0.1 | 0.7  | 3.4 | 32.7 | 31.8 | 53.4 | 1.7681 | 2.7 |
| 4/20/2018 9:53  | 0.1 | 1.2  | 5.1 | 31.1 | 30.9 | 53.3 | 1.6895 | 2.7 |
| 4/20/2018 9:54  | 0.1 | 0.5  | 4   | 31.2 | 30.7 | 53   | 1.6858 | 2.7 |
| 4/20/2018 9:55  | 0.1 | 0.4  | 3.3 | 31   | 30.6 | 52.7 | 1.7091 | 2.8 |
| 4/20/2018 9:56  | 0.2 | 0.2  | 3.6 | 30.6 | 30.1 | 52.3 | 1.6802 | 2.8 |
| 4/20/2018 9:57  | 0.2 | 0.8  | 3.1 | 30.3 | 29.7 | 52.1 | 1.6697 | 2.9 |
| 4/20/2018 9:58  | 0.2 | 0    | 3.3 | 29.3 | 29.2 | 51.5 | 1.6183 | 2.9 |
| 4/20/2018 9:59  | 0.2 | 0.1  | 3.2 | 28.7 | 28.3 | 50.7 | 1.5921 | 2.9 |
| 4/20/2018 10:00 | 0.2 | 0.8  | 3.1 | 27.2 | 27.1 | 50   | 1.5353 | 3   |
| 4/20/2018 10:01 | 0.2 | 0    | 3.8 | 27   | 26.6 | 49.1 | 1.5184 | 3   |
| 4/20/2018 10:02 | 0.2 | 0.1  | 3.8 | 26.6 | 26.2 | 48.1 | 1.4718 | 2.9 |
| 4/20/2018 10:03 | 0.2 | -0.2 | 3.9 | 27   | 26.7 | 47.4 | 1.5025 | 3   |
| 4/20/2018 10:04 | 0.2 | 0.7  | 3.6 | 26.2 | 25.8 | 46.3 | 1.4594 | 2.7 |
| 4/20/2018 10:05 | 0.2 | -0.4 | 2.3 | 27.4 | 26.4 | 45.6 | 1.5032 | 1.9 |
| 4/20/2018 10:06 | 0.2 | 0.6  | 3.4 | 27.2 | 26.4 | 45   | 1.5131 | 2.1 |
| 4/20/2018 10:07 | 0.2 | 0.7  | 3.1 | 25.5 | 25.5 | 44.6 | 1.4486 | 2.3 |
| 4/20/2018 10:08 | 0.2 | 0.7  | 3   | 26.8 | 25.8 | 44.2 | 1.499  | 2.5 |
| 4/20/2018 10:09 | 0.2 | 0.5  | 4.4 | 26   | 25.4 | 43.9 | 1.4688 | 2.6 |
| 4/20/2018 10:10 | 0.2 | 0.7  | 3.4 | 25.8 | 25.1 | 43.9 | 1.4455 | 2.7 |
| 4/20/2018 10:11 | 0.2 | 0.7  | 4   | 26.2 | 25.1 | 43.7 | 1.4658 | 2.8 |
| 4/20/2018 10:12 | 0.2 | 0.5  | 3.1 | 26   | 25.1 | 43.7 | 1.4618 | 2.8 |
| 4/20/2018 10:13 | 0.2 | 0    | 4.1 | 25.6 | 24.9 | 43.7 | 1.46   | 2.6 |
| 4/20/2018 10:14 | 0.2 | 0.7  | 3   | 25.7 | 24.8 | 43.6 | 1.4678 | 2.6 |
| 4/20/2018 10:15 | 0.2 | 0.4  | 3.5 | 25.1 | 24.5 | 43.3 | 1.4503 | 2.6 |
| 4/20/2018 10:16 | 0.2 | 0.1  | 3.9 | 25.5 | 24.2 | 43.2 | 1.4613 | 2.3 |
| 4/20/2018 10:17 | 0.2 | 0.5  | 3.8 | 25   | 24.1 | 43.1 | 1.4262 | 1.9 |
| 4/20/2018 10:18 | 0.2 | 0.3  | 3.3 | 24.8 | 23.7 | 42.9 | 1.4305 | 2.1 |
| 4/20/2018 10:19 | 0.1 | 0.8  | 3.1 | 24.7 | 23.5 | 42.7 | 1.4153 | 2.3 |
| 4/20/2018 10:20 | 0.1 | 0.4  | 3.4 | 24.4 | 23.3 | 42.4 | 1.4018 | 2.4 |
| 4/20/2018 10:21 | 0.1 | 0.4  | 2.5 | 24.7 | 23.2 | 42.1 | 1.4118 | 2.5 |
| 4/20/2018 10:22 | 0.2 | 0.6  | 3.9 | 24.4 | 23.1 | 41.8 | 1.392  | 2.4 |
| 4/20/2018 10:23 | 0.2 | 1    | 3.9 | 24.8 | 23   | 41.4 | 1.418  | 2.4 |
| 4/20/2018 10:24 | 0.2 | -0.1 | 4.4 | 24.3 | 22.9 | 41.3 | 1.3897 | 2.6 |
| 4/20/2018 10:25 | 0.2 | 0.1  | 2.9 | 24.1 | 22.7 | 41   | 1.4022 | 2.5 |
| 4/20/2018 10:26 | 0.2 | 0.9  | 3.3 | 23.7 | 22.2 | 40.8 | 1.3615 | 2.6 |
| 4/20/2018 10:27 | 0.1 | 1    | 4   | 23.9 | 22.2 | 40.7 | 1.3758 | 2.5 |
| 4/20/2018 10:28 | 0.1 | 0.4  | 3.7 | 23.8 | 22   | 40.5 | 1.3627 | 2.5 |
| 4/20/2018 10:29 | 0.1 | 0.2  | 3.7 | 23.2 | 21.6 | 40.4 | 1.3213 | 2.4 |



|                 |     |     |     |      |      |      |        |     |
|-----------------|-----|-----|-----|------|------|------|--------|-----|
| 4/20/2018 10:30 | 0.1 | 0.7 | 4   | 23.2 | 21.3 | 40.1 | 1.3342 | 2.4 |
| 4/20/2018 10:31 | 0.1 | 0.5 | 3.4 | 23.1 | 21.2 | 39.8 | 1.3115 | 2.4 |
| 4/20/2018 10:32 | 0.1 | 0.3 | 3.9 | 23   | 20.9 | 39.3 | 1.2985 | 2.3 |
| 4/20/2018 10:33 | 0.1 | 0.3 | 1.9 | 22.7 | 20.5 | 38.8 | 1.258  | 2.2 |
| 4/20/2018 10:34 | 0.2 | 0.2 | 2.5 | 22   | 19.8 | 38.1 | 1.2282 | 2.3 |
| 4/20/2018 10:35 | 0.2 | 0.6 | 3.3 | 21.9 | 19.5 | 37.5 | 1.2077 | 2.3 |
| 4/20/2018 10:36 | 0.2 | 0.6 | 3   | 22.4 | 19.7 | 36.8 | 1.2097 | 2.3 |
| 4/20/2018 10:37 | 0.3 | 0.7 | 3   | 22.6 | 19.8 | 36.2 | 1.247  | 2.3 |
| 4/20/2018 10:38 | 0.3 | 0.2 | 1.8 | 22.5 | 19.7 | 35.9 | 1.2347 | 2.3 |
| 4/20/2018 10:39 | 0.2 | 0.6 | 3.1 | 22.1 | 19.4 | 35.5 | 1.2347 | 2.5 |
| 4/20/2018 10:40 | 0.2 | 0.8 | 3   | 21.7 | 19.2 | 35   | 1.1903 | 2.5 |
| 4/20/2018 10:41 | 0.2 | 0.4 | 2.4 | 21.9 | 18.9 | 34.6 | 1.193  | 2.3 |
| 4/20/2018 10:42 | 0.2 | 0.7 | 2.9 | 21.8 | 19.1 | 34.5 | 1.209  | 1.8 |
| 4/20/2018 10:43 | 0.3 | 0.7 | 2.8 | 21.6 | 18.8 | 34.3 | 1.1765 | 1.6 |
| 4/20/2018 10:44 | 0.3 | 0.4 | 3.5 | 21.4 | 19.1 | 34   | 1.1532 | 1.6 |
| 4/20/2018 10:45 | 0.4 | 1   | 3.6 | 20.8 | 19.2 | 33.4 | 1.0578 | 1.7 |
| 4/20/2018 10:46 | 0.6 | 1.4 | 4.8 | 20.5 | 19.2 | 32.2 | 1.0089 | 1.8 |
| 4/20/2018 10:47 | 0.8 | 1   | 2.1 | 20.1 | 19.3 | 30.6 | 0.9262 | 2   |
| 4/20/2018 10:48 | 0.9 | 1.2 | 2.9 | 20   | 19.3 | 28.8 | 0.887  | 2   |
| 4/20/2018 10:49 | 1.1 | 1.9 | 3.3 | 19.5 | 19.2 | 27.3 | 0.8184 | 2.1 |
| 4/20/2018 10:50 | 1.3 | 1.6 | 4.2 | 19.7 | 19   | 25   | 0.764  | 2   |
| 4/20/2018 10:51 | 1.5 | 2.3 | 4   | 19.7 | 19   | 22.5 | 0.729  | 1.9 |
| 4/20/2018 10:52 | 1.6 | 2.3 | 3.5 | 19.3 | 19   | 20.5 | 0.6877 | 2   |
| 4/20/2018 10:53 | 1.8 | 2.1 | 4.2 | 19.5 | 18.3 | 18   | 0.6403 | 2   |
| 4/20/2018 10:54 | 2   | 2.7 | 3.2 | 19.5 | 18.2 | 15.8 | 0.5994 | 2   |
| 4/20/2018 10:55 | 2.2 | 2.2 | 4.5 | 19.5 | 18.2 | 13.9 | 0.5966 | 2   |
| 4/20/2018 10:56 | 2.3 | 2.8 | 4.9 | 19.7 | 18.2 | 12.6 | 0.5493 | 2   |
| 4/20/2018 10:57 | 2.5 | 4   | 3.7 | 19.7 | 17.4 | 11   | 0.5242 | 2   |
| 4/20/2018 10:58 | 2.8 | 3.5 | 3.6 | 19.9 | 16.9 | 9.6  | 0.4945 | 2   |
| 4/20/2018 10:59 | 3.1 | 3.7 | 4.5 | 19.7 | 16.9 | 8.7  | 0.4894 | 2   |
| 4/20/2018 11:00 | 3.4 | 4   | 4.8 | 20.2 | 16.5 | 7.7  | 0.4736 | 2   |
| 4/20/2018 11:01 | 3.6 | 4.5 | 4.2 | 20.4 | 16.3 | 6.8  | 0.4487 | 2   |
| 4/20/2018 11:02 | 3.9 | 4.8 | 4.7 | 20.6 | 15.7 | 6.1  | 0.4288 | 2.1 |
| 4/20/2018 11:03 | 4.2 | 5.5 | 3.9 | 21   | 15.4 | 5.6  | 0.4008 | 1.9 |
| 4/20/2018 11:04 | 4.5 | 5.7 | 5.3 | 20.9 | 15.1 | 4.9  | 0.4081 | 1.7 |
| 4/20/2018 11:05 | 4.8 | 5.5 | 4.2 | 21.1 | 14.8 | 4.5  | 0.385  | 1.7 |
| 4/20/2018 11:06 | 4.9 | 5.1 | 5.2 | 21.1 | 14.7 | 4.2  | 0.3881 | 1.6 |
| 4/20/2018 11:07 | 5.1 | 5.9 | 4.5 | 21.6 | 14.4 | 3.8  | 0.3667 | 1.7 |
| 4/20/2018 11:08 | 5.4 | 6.2 | 3.6 | 21.8 | 13.9 | 3.5  | 0.355  | 1.8 |
| 4/20/2018 11:09 | 5.7 | 6.2 | 5.1 | 21.8 | 13.7 | 3.3  | 0.351  | 1.8 |
| 4/20/2018 11:10 | 6   | 6.7 | 5.9 | 22   | 13.2 | 3.1  | 0.3316 | 1.8 |
| 4/20/2018 11:11 | 6.3 | 7.6 | 4.7 | 22.6 | 12.9 | 2.9  | 0.3314 | 1.8 |
| 4/20/2018 11:12 | 6.7 | 8   | 4   | 23   | 12.5 | 2.7  | 0.304  | 1.7 |
| 4/20/2018 11:13 | 7   | 7.6 | 5.7 | 23.2 | 12.2 | 2.6  | 0.3148 | 1.8 |
| 4/20/2018 11:14 | 7.2 | 8.3 | 4.8 | 23   | 12   | 2.5  | 0.3034 | 1.9 |
| 4/20/2018 11:15 | 7.5 | 8.6 | 6.6 | 23.7 | 11.8 | 2.4  | 0.3017 | 1.9 |
| 4/20/2018 11:16 | 7.9 | 9.1 | 6.2 | 24   | 11   | 2.3  | 0.2774 | 1.9 |

|                 |     |      |     |       |      |      |        |     |
|-----------------|-----|------|-----|-------|------|------|--------|-----|
| 4/20/2018 11:17 | 8   | 7.5  | 5.3 | 23.2  | 10.9 | 2.2  | 0.2817 | 1.8 |
| 4/20/2018 11:18 | 7.9 | 8.1  | 6.2 | 23    | 11.1 | 2.2  | 0.2986 | 1.7 |
| 4/20/2018 11:19 | 7.6 | 7.5  | 5.4 | 23.2  | 11   | 2.1  | 0.2819 | 1.6 |
| 4/20/2018 11:20 | 7.5 | 7.6  | 4.9 | 23.1  | 11.1 | 2.1  | 0.2988 | 1.6 |
| 4/20/2018 11:21 | 7.4 | 8.3  | 6.5 | 23.4  | 11.1 | 2.1  | 0.2845 | 1.8 |
| 4/20/2018 11:22 | 7.2 | 6.6  | 5.3 | 22.8  | 11.4 | 3.2  | 0.2999 | 1.9 |
| 4/20/2018 11:23 | 6.3 | 5.1  | 5.8 | 47.8  | 33   | 21.6 | 0.7527 | 2   |
| 4/20/2018 11:24 | 4.5 | 2.7  | 5.6 | 103.1 | 39.7 | 35.5 | 1.7243 | 2.4 |
| 4/20/2018 11:25 | 2.4 | 0.3  | 7.5 | 131.4 | 48.7 | 48.2 | 2.4055 | 2.6 |
| 4/20/2018 11:26 | 0.9 | 0    | 6.3 | 148.1 | 50.2 | 50.2 | 2.7525 | 2.7 |
| 4/20/2018 11:27 | 0.4 | -0.1 | 7.6 | 157.7 | 51   | 52.8 | 3.0542 | 2.8 |
| 4/20/2018 11:28 | 0.3 | -0.7 | 7.7 | 169.7 | 52.7 | 52.9 | 3.4273 | 2.7 |
| 4/20/2018 11:29 | 0.3 | -0.3 | 7.2 | 175.6 | 51   | 53   | 3.6107 | 2.7 |
| 4/20/2018 11:30 | 0.3 | 0    | 6.7 | 163.4 | 48.8 | 53   | 3.5492 | 2.7 |
| 4/20/2018 11:31 | 0.3 | -0.4 | 7.4 | 167.9 | 47.7 | 52.9 | 3.6672 | 2.8 |
| 4/20/2018 11:32 | 0.2 | -0.8 | 5.2 | 166   | 48.9 | 53   | 3.8835 | 2.9 |
| 4/20/2018 11:33 | 0.2 | -0.4 | 7.3 | 153.2 | 45.7 | 52.6 | 3.6937 | 2.8 |
| 4/20/2018 11:34 | 0.3 | 0.5  | 6.4 | 162.9 | 46.6 | 52.6 | 3.8953 | 2.8 |
| 4/20/2018 11:35 | 0.3 | 0.1  | 6.5 | 152.5 | 45.3 | 52.5 | 3.8273 | 2.9 |
| 4/20/2018 11:36 | 0.2 | -0.3 | 6.8 | 161.6 | 46.1 | 52.3 | 4.0572 | 3   |
| 4/20/2018 11:37 | 0.2 | -0.1 | 5.8 | 145.7 | 44.7 | 52.2 | 3.9023 | 3   |
| 4/20/2018 11:38 | 0.3 | -0.1 | 7.6 | 143.2 | 42.2 | 51.8 | 3.795  | 3   |
| 4/20/2018 11:39 | 0.3 | 0.2  | 6.7 | 135.8 | 41.5 | 51.5 | 3.7773 | 3   |
| 4/20/2018 11:40 | 0.3 | -0.1 | 5.6 | 134.8 | 41.5 | 50.9 | 3.8412 | 2.9 |
| 4/20/2018 11:41 | 0.3 | 0.4  | 5.9 | 128.2 | 40.2 | 50.6 | 3.7343 | 2.6 |
| 4/20/2018 11:42 | 0.3 | 0.1  | 5.6 | 123.2 | 38.6 | 50.1 | 3.6283 | 2.7 |
| 4/20/2018 11:43 | 0.3 | -0.2 | 6.4 | 122.7 | 38.4 | 49.4 | 3.6852 | 2.9 |
| 4/20/2018 11:44 | 0.2 | 0    | 5   | 118.8 | 38.3 | 48.9 | 3.6477 | 3   |
| 4/20/2018 11:45 | 0.2 | 0.4  | 6.5 | 115.5 | 37.1 | 48.2 | 3.5892 | 3.1 |
| 4/20/2018 11:46 | 0.2 | 0.6  | 5.4 | 113.4 | 36.4 | 47.6 | 3.5415 | 3   |
| 4/20/2018 11:47 | 0.3 | 0.5  | 7.6 | 107.1 | 35   | 47   | 3.4445 | 2.8 |
| 4/20/2018 11:48 | 0.3 | 1    | 6.1 | 105.6 | 34.2 | 46.4 | 3.3948 | 2.4 |
| 4/20/2018 11:49 | 0.3 | 0.6  | 6.3 | 102.9 | 33.9 | 45.8 | 3.4238 | 2.4 |
| 4/20/2018 11:50 | 0.3 | 0.1  | 5.1 | 99.5  | 32.9 | 45.2 | 3.3413 | 2.4 |
| 4/20/2018 11:51 | 0.2 | 0.2  | 3.9 | 100.8 | 32.8 | 44.8 | 3.3783 | 2.5 |
| 4/20/2018 11:52 | 0.2 | 0.4  | 5.4 | 101.5 | 32.5 | 44.5 | 3.3742 | 2.6 |
| 4/20/2018 11:53 | 0.2 | 0.1  | 6.8 | 98.3  | 33.1 | 44.1 | 3.4362 | 2.8 |
| 4/20/2018 11:54 | 0.2 | 0.6  | 5.5 | 91.4  | 30.9 | 43.4 | 3.3097 | 2.8 |
| 4/20/2018 11:55 | 0.2 | 1.2  | 4.6 | 90.3  | 30   | 42.9 | 3.2647 | 2.8 |
| 4/20/2018 11:56 | 0.2 | 1    | 5.5 | 88.8  | 30.1 | 42.6 | 3.2187 | 2.6 |
| 4/20/2018 11:57 | 0.1 | 0.4  | 5.4 | 91.6  | 30.1 | 42.3 | 3.3135 | 2.7 |
| 4/20/2018 11:58 | 0.1 | 0.4  | 3.6 | 89    | 30   | 42   | 3.2908 | 2.8 |
| 4/20/2018 11:59 | 0.1 | 0.7  | 5.2 | 91.1  | 30.2 | 41.9 | 3.3357 | 2.8 |
| 4/20/2018 12:00 | 0.1 | 0.6  | 5   | 81.2  | 28.4 | 41.4 | 3.154  | 2.8 |
| 4/20/2018 12:01 | 0.1 | 0.7  | 4.9 | 80.9  | 27.8 | 40.8 | 3.1817 | 2.8 |
| 4/20/2018 12:02 | 0.1 | 0.9  | 4.8 | 80.1  | 27.5 | 40.3 | 3.1045 | 2.8 |
| 4/20/2018 12:03 | 0.1 | 0.9  | 4.8 | 81    | 27.4 | 40.1 | 3.1463 | 2.8 |

|                 |     |      |     |      |      |      |        |     |
|-----------------|-----|------|-----|------|------|------|--------|-----|
| 4/20/2018 12:04 | 0.1 | 0.6  | 4.8 | 75.7 | 26.7 | 39.8 | 3.0655 | 2.9 |
| 4/20/2018 12:05 | 0.1 | 0.4  | 5.8 | 79.3 | 27.1 | 39.5 | 3.1478 | 2.9 |
| 4/20/2018 12:06 | 0.1 | 0.2  | 4.2 | 76.6 | 26.8 | 39.2 | 3.103  | 2.9 |
| 4/20/2018 12:07 | 0.1 | 0.8  | 4.1 | 74.6 | 26   | 38.7 | 3.0498 | 3   |
| 4/20/2018 12:08 | 0.1 | 0.4  | 5.4 | 71.7 | 25.2 | 38.2 | 3.0468 | 2.9 |
| 4/20/2018 12:09 | 0.1 | 0    | 4.5 | 73.2 | 25.5 | 38.1 | 3.0504 | 2.8 |
| 4/20/2018 12:10 | 0.2 | -0.1 | 4.7 | 70.9 | 24.9 | 37.9 | 3.0266 | 2.8 |
| 4/20/2018 12:11 | 0.2 | 1    | 4.2 | 72   | 24.8 | 37.7 | 3.0147 | 2.9 |
| 4/20/2018 12:12 | 0.1 | 0.4  | 3.3 | 69.2 | 24.5 | 37.5 | 3.007  | 2.9 |
| 4/20/2018 12:13 | 0.1 | 0.5  | 5.3 | 68   | 23.7 | 37.3 | 2.9348 | 2.8 |
| 4/20/2018 12:14 | 0.1 | 0.8  | 5.4 | 67.2 | 23.8 | 36.9 | 2.9672 | 2.9 |
| 4/20/2018 12:15 | 0.2 | 0.6  | 4.2 | 67.6 | 23.3 | 36.6 | 2.9533 | 2.9 |
| 4/20/2018 12:16 | 0.2 | 0    | 4.2 | 64   | 23.1 | 36.4 | 2.8983 | 2.8 |
| 4/20/2018 12:17 | 0.2 | 0.7  |     | 64.9 | 22.8 | 36.1 | 2.9337 | 2.9 |
| 4/20/2018 12:18 | 0.2 | 1.1  | 3.7 | 66.4 | 22.7 | 36   | 2.9486 | 2.7 |
| 4/20/2018 12:19 | 0.2 | 0    | 4.6 | 65.1 | 22.5 | 35.8 | 2.9465 | 2.7 |
| 4/20/2018 12:20 | 0.2 | 0.3  |     | 60.4 | 21.7 | 35.4 | 2.8043 | 2.8 |
| 4/20/2018 12:21 | 0.2 | 0.4  |     | 63.6 | 21.7 | 35.2 | 2.8917 | 2.8 |
| 4/20/2018 12:22 | 0.1 | 0    | 3.9 | 62.5 | 21.8 | 35.1 | 2.8938 | 2.9 |
| 4/20/2018 12:23 | 0.1 | -0.1 | 4.4 | 59.9 | 21   | 34.9 | 2.8145 | 2.9 |
| 4/20/2018 12:24 | 0.1 | 0.9  |     | 56.5 | 20.4 | 34.6 | 2.7548 | 2.9 |
| 4/20/2018 12:25 | 0.2 | 0.8  |     | 54.5 | 19.6 | 34.2 | 2.6641 | 2.9 |
| 4/20/2018 12:26 | 0.2 | 0.4  |     | 54.5 | 19.6 | 33.8 | 2.7144 | 2.9 |
| 4/20/2018 12:27 | 0.3 | 0.3  |     | 53.2 | 19.1 | 33.2 | 2.651  | 2.8 |
| 4/20/2018 12:28 | 0.2 | 0.8  | 4.7 | 53.9 | 19.3 | 32.7 | 2.681  | 2.9 |
| 4/20/2018 12:29 | 0.2 | -0.2 | 4.4 | 50.8 | 18.9 | 32.3 | 2.5753 | 2.9 |
| 4/20/2018 12:30 | 0.2 | 0.4  |     | 49.2 | 18.4 | 31.6 | 2.555  | 2.8 |
| 4/20/2018 12:31 | 0.2 | 1.1  |     | 49.5 | 18.3 | 31   | 2.5386 | 2.8 |
| 4/20/2018 12:32 | 0.2 | 1.1  | 5.3 | 50.5 | 18.2 | 30.5 | 2.5486 | 2.5 |
| 4/20/2018 12:33 | 0.2 | 1    | 5.2 | 51.4 | 18.5 | 30.3 | 2.6118 | 2.2 |
| 4/20/2018 12:34 | 0.2 | 0.7  | 4.2 | 48.9 | 18.2 | 30   | 2.5588 | 2.5 |
| 4/20/2018 12:35 | 0.2 | 1.2  | 4.9 | 49.7 | 17.7 | 29.7 | 2.5614 | 2.8 |
| 4/20/2018 12:36 | 0.1 | 0.8  | 4.3 | 48.3 | 17.5 | 29.5 | 2.5307 | 2.9 |
| 4/20/2018 12:37 | 0.1 | 0.5  | 4.1 | 48.3 | 17.6 | 29.4 | 2.5753 | 2.9 |
| 4/20/2018 12:38 | 0.2 | 0.6  | 4.5 | 46.7 | 16.8 | 29.2 | 2.5189 | 2.9 |
| 4/20/2018 12:39 | 0.2 | 0.2  | 4.6 | 46.8 | 16.8 | 29.1 | 2.5318 | 3   |
| 4/20/2018 12:40 | 0.2 | 0.3  | 2.8 | 47   | 16.8 | 29   | 2.5258 | 3   |
| 4/20/2018 12:41 | 0.2 | 0.1  | 1.7 | 45.8 | 16.7 | 28.7 | 2.4698 | 3   |
| 4/20/2018 12:42 | 0.2 | 0.9  | 3.2 | 43.8 | 16.7 | 28.4 | 2.4347 | 3   |
| 4/20/2018 12:43 | 0.2 | 1.5  | 3.8 | 44.3 | 16.2 | 28.1 | 2.4037 | 3.1 |
| 4/20/2018 12:44 | 0.3 | 1.2  | 4.5 | 40.1 | 16.5 | 27.4 | 2.2208 | 3   |
| 4/20/2018 12:45 | 0.5 | 1.4  | 3.9 | 34.5 | 16.7 | 24.5 | 2.0274 | 2.8 |
| 4/20/2018 12:46 | 1.5 | 6.8  | 3.7 | 21.2 | 12.4 | 9.7  | 1.1143 | 2.7 |
| 4/20/2018 12:47 | 3.3 | 8.6  | 4.5 | 21.3 | 9.6  | 5    | 0.761  | 2.6 |
| 4/20/2018 12:48 | 5.3 | 9.7  | 4.9 | 21.8 | 8.6  | 3.5  | 0.6348 | 2.3 |
| 4/20/2018 12:49 | 6.6 | 9.8  | 4.7 | 23.7 | 8.8  | 3.3  | 0.6373 | 2.4 |
| 4/20/2018 12:50 | 6.9 | 8.2  | 4   | 26.4 | 10.4 | 3.3  | 0.8344 | 2.4 |

|                 |      |      |      |      |      |     |        |     |
|-----------------|------|------|------|------|------|-----|--------|-----|
| 4/20/2018 12:51 | 6.5  | 7.6  | 5.4  | 25.2 | 12.5 | 3.6 | 0.9658 | 2.3 |
| 4/20/2018 12:52 | 6.6  | 9    | 4.7  | 23.9 | 10   | 3.6 | 0.7114 | 2.4 |
| 4/20/2018 12:53 | 6.9  | 9.3  | 5.5  | 23.1 | 10.4 | 3.7 | 0.728  | 2.5 |
| 4/20/2018 12:54 | 7.4  | 9.5  | 4.8  | 24.8 | 10.6 | 3.8 | 0.7703 | 2.6 |
| 4/20/2018 12:55 | 7.5  | 10.3 | 5.4  | 23.9 | 9.7  | 3.8 | 0.656  | 2.4 |
| 4/20/2018 12:56 | 7.8  | 11.7 | 4.5  | 23.9 | 8.8  | 3.8 | 0.5979 | 2.3 |
| 4/20/2018 12:57 | 8.4  | 10.7 | 5.3  | 24.9 | 8.5  | 3.7 | 0.6133 | 2.3 |
| 4/20/2018 12:58 | 8.4  | 9.1  | 3.8  | 25.9 | 8.5  | 3.7 | 0.7469 | 2.5 |
| 4/20/2018 12:59 | 8    | 8.5  | 4.6  | 26.1 | 9.7  | 3.5 | 0.7504 | 2.5 |
| 4/20/2018 13:00 | 7.3  | 9.1  | 5.6  | 25.8 | 11   | 3.4 | 0.7713 | 2.5 |
| 4/20/2018 13:01 | 7.2  | 8.9  | 6.4  | 25.5 | 10.3 | 3.3 | 0.7143 | 2.6 |
| 4/20/2018 13:02 | 7.3  | 9.8  | 4.7  | 25.5 | 10   | 3.3 | 0.6936 | 2   |
| 4/20/2018 13:03 | 7.7  | 9.7  | 5.4  | 25.7 | 9.3  | 3.2 | 0.6421 | 1.7 |
| 4/20/2018 13:04 | 7.9  | 10.9 | 4.7  | 25.6 | 9.4  | 3.2 | 0.6496 | 1.9 |
| 4/20/2018 13:05 | 8.2  | 10.7 | 5.6  | 25.3 | 8.8  | 3.2 | 0.5941 | 2.1 |
| 4/20/2018 13:06 | 8.3  | 10.8 | 3.9  | 25.3 | 8.5  | 3.1 | 0.5646 | 2.1 |
| 4/20/2018 13:07 | 8.9  | 11.1 | 7    | 25.4 | 7.9  | 3   | 0.5416 | 2.1 |
| 4/20/2018 13:08 | 9.3  | 11.2 | 4.6  | 25.3 | 7.6  | 2.9 | 0.5066 | 2.4 |
| 4/20/2018 13:09 | 9.4  | 11.5 | 6.3  | 25   | 7.6  | 2.8 | 0.509  | 2.5 |
| 4/20/2018 13:10 | 9.7  | 13.1 | 6.6  | 25.5 | 6.8  | 2.7 | 0.4511 | 2.6 |
| 4/20/2018 13:11 | 10.1 | 12.4 | 7.3  | 25.6 | 6.6  | 2.5 | 0.4402 | 2.6 |
| 4/20/2018 13:12 | 10.5 | 11.8 | 5.2  | 25.5 | 6.6  | 2.5 | 0.4473 | 2.7 |
| 4/20/2018 13:13 | 10.7 | 12.6 | 6.5  | 25.6 | 6.4  | 2.4 | 0.4158 | 2.8 |
| 4/20/2018 13:14 | 11   | 13.2 | 6.9  | 26   | 6.1  | 2.3 | 0.4076 | 2.8 |
| 4/20/2018 13:15 | 11.5 | 14.4 | 5.7  | 26.8 | 5.6  | 2.2 | 0.3563 | 2.8 |
| 4/20/2018 13:16 | 11.9 | 14.2 | 6.2  | 26.3 | 5.6  | 2.1 | 0.3781 | 2.7 |
| 4/20/2018 13:17 | 12.2 | 15.2 | 10.1 | 34   | 5.4  | 2.1 | 0.3637 | 2.8 |
| 4/20/2018 13:18 | 13.3 | 18.7 | 11.7 | 25.7 | 5.4  | 2.1 | 0.342  | 2.8 |
| 4/20/2018 13:19 | 14.7 | 18.7 | 10.9 | 29   | 5.1  | 2   | 0.3348 | 2.2 |
| 4/20/2018 13:20 | 16.1 | 19.1 | 10   | 30.4 | 5    | 1.9 | 0.3192 | 1.4 |
| 4/20/2018 13:21 | 16.6 | 19.7 | 11   | 30.5 | 4.8  | 1.9 | 0.3193 | 1.4 |
| 4/20/2018 13:22 | 17   | 19.6 | 10.9 | 31.3 | 4.8  | 1.8 | 0.3034 | 1.4 |
| 4/20/2018 13:23 | 17.5 | 20   | 11   | 31   | 4.6  | 1.7 | 0.2971 | 1.5 |
| 4/20/2018 13:24 | 17.6 | 20   | 12.4 | 30.8 | 4.6  | 1.7 | 0.2893 | 1.7 |
| 4/20/2018 13:25 | 17.9 | 19.8 | 11.1 | 31.4 | 4.5  | 1.7 | 0.2707 | 1.8 |
| 4/20/2018 13:26 | 17.8 | 19.5 | 11.4 | 31.1 | 4.4  | 1.6 | 0.2826 | 2   |
| 4/20/2018 13:27 | 18.1 | 20.7 | 12.2 | 32.1 | 4.4  | 1.6 | 0.2712 | 2.1 |
| 4/20/2018 13:28 | 18.2 | 19.6 | 11.8 | 31.6 | 4.4  | 1.6 | 0.2744 | 2.2 |
| 4/20/2018 13:29 | 18   | 18.7 | 10.5 | 30.3 | 4.4  | 1.6 | 0.2784 | 2.3 |
| 4/20/2018 13:30 | 17.4 | 17.9 | 9.8  | 29.4 | 4.4  | 1.6 | 0.2671 | 2.4 |
| 4/20/2018 13:31 | 16.8 | 17.3 | 10.1 | 29.7 | 4.3  | 1.6 | 0.2681 | 2.2 |
| 4/20/2018 13:32 | 16.5 | 17   | 9.8  | 29.2 | 4.3  | 1.6 | 0.2558 | 2.2 |
| 4/20/2018 13:33 | 16.2 | 16.8 | 9.6  | 28.7 | 4.3  | 1.6 | 0.2751 | 2.3 |
| 4/20/2018 13:34 | 15.8 | 17.2 | 9.2  | 28.3 | 4.2  | 1.7 | 0.2481 | 2.5 |
| 4/20/2018 13:35 | 15.6 | 17   | 9.5  | 28.2 | 4.2  | 1.7 | 0.2561 | 2.5 |
| 4/20/2018 13:36 | 15.5 | 16.9 | 9.7  | 28.2 | 4.2  | 1.7 | 0.2313 | 2.6 |
| 4/20/2018 13:37 | 15.2 | 15.6 | 9.3  | 27   | 4.2  | 1.7 | 0.2461 | 2.7 |

|                 |      |      |      |       |      |      |        |     |
|-----------------|------|------|------|-------|------|------|--------|-----|
| 4/20/2018 13:38 | 14.8 | 16.4 | 9.2  | 27.7  | 4.2  | 1.6  | 0.2442 | 2.6 |
| 4/20/2018 13:39 | 14.7 | 16.1 | 9.6  | 27.5  | 4.1  | 1.6  | 0.2428 | 1.7 |
| 4/20/2018 13:40 | 14.7 | 15.7 | 10   | 27.2  | 4.1  | 1.6  | 0.2405 | 1.4 |
| 4/20/2018 13:41 | 14.8 | 16.7 | 10.8 | 28    | 4.2  | 1.6  | 0.2199 | 1.4 |
| 4/20/2018 13:42 | 14.3 | 13.6 | 6.7  | 25.6  | 4.4  | 1.6  | 0.2435 | 1.5 |
| 4/20/2018 13:43 | 13.4 | 14.2 | 7.4  | 25.8  | 4.4  | 1.7  | 0.2309 | 1.5 |
| 4/20/2018 13:44 | 13   | 14.8 | 8.9  | 26.4  | 4.3  | 1.7  | 0.2495 | 1.6 |
| 4/20/2018 13:45 | 12.9 | 13.6 | 8    | 26    | 4.2  | 1.7  | 0.2309 | 1.7 |
| 4/20/2018 13:46 | 12.9 | 12.8 | 8.3  | 24.7  | 6.2  | 3.5  | 0.2439 | 1.7 |
| 4/20/2018 13:47 | 11.1 | 7.8  | 5.1  | 36.2  | 25.7 | 28.1 | 0.4921 | 1.9 |
| 4/20/2018 13:48 | 8    | 3.9  | 6.3  | 90.3  | 29.4 | 29.7 | 1.1848 | 2.1 |
| 4/20/2018 13:49 | 4.2  | 1.1  | 6.7  | 123.9 | 39.7 | 39.8 | 1.7638 | 2.4 |
| 4/20/2018 13:50 | 1.7  | 0.2  | 7.6  | 145.7 | 41.8 | 40.8 | 2.1438 | 2.6 |
| 4/20/2018 13:51 | 0.4  | 0.4  | 7    | 160.6 | 42   | 41.8 | 2.5083 | 2.8 |
| 4/20/2018 13:52 | 0.2  | 0.6  | 8.9  | 168.3 | 41.5 | 41.6 | 2.7907 | 2.8 |
| 4/20/2018 13:53 | 0.1  | -1.1 | 6.4  | 166   | 40.8 | 41.5 | 2.8494 | 2.9 |
| 4/20/2018 13:54 | 0.1  | -0.4 | 8.1  | 159.9 | 39.9 | 41.3 | 2.8595 | 2.9 |
| 4/20/2018 13:55 | 0.1  | -0.4 | 6.8  | 156.3 | 39.2 | 41.1 | 2.9853 | 2.9 |
| 4/20/2018 13:56 | 0.1  | -0.6 | 5.8  | 149.6 | 38   | 40.9 | 3.0288 | 2.9 |
| 4/20/2018 13:57 | 0.1  | 0.1  | 6.8  | 146.2 | 37.3 | 40.7 | 3.0618 | 2.6 |
| 4/20/2018 13:58 | 0.1  | 0.2  | 6.7  | 140.8 | 36.8 | 40.4 | 3.0714 | 2.5 |
| 4/20/2018 13:59 | 0.1  | -0.1 | 5.3  | 134.1 | 36.8 | 40   | 3.0333 | 2.5 |
| 4/20/2018 14:00 | 0.1  | 0    | 6.9  | 131.3 | 35.5 | 39.5 | 3.0676 | 2.5 |
| 4/20/2018 14:01 | 0.1  | 0.4  | 5.2  | 127.5 | 33.8 | 39   | 3.0499 | 2.5 |
| 4/20/2018 14:02 | 0.1  | 0.2  | 5.7  | 119.9 | 32.6 | 38.4 | 2.9814 | 2.5 |
| 4/20/2018 14:03 | 0.2  | 0.6  | 6.1  | 109.5 | 30.9 | 36.1 | 2.8416 | 2.5 |
| 4/20/2018 14:04 | 0.3  | 0.1  | 5.2  | 99.8  | 28.2 | 30.4 | 2.6503 | 2.4 |
| 4/20/2018 14:05 | 0.3  | 0.4  | 5.7  | 98.1  | 28   | 31.3 | 2.6913 | 2.4 |
| 4/20/2018 14:06 | 0.4  | -0.2 | 5.9  | 89.8  | 26.9 | 30.1 | 2.6293 | 2.4 |
| 4/20/2018 14:07 | 0.4  | 1.2  | 6.5  | 93.9  | 26.1 | 28.7 | 2.6298 | 2.3 |
| 4/20/2018 14:08 | 0.3  | 0    | 6    | 97.2  | 27.4 | 28.9 | 2.7506 | 2.4 |
| 4/20/2018 14:09 | 0.4  | 0.5  | 6.2  | 84.9  | 25.5 | 29   | 2.5658 | 2.4 |
| 4/20/2018 14:10 | 0.4  | 1.4  | 6.7  | 91.2  | 26   | 29.2 | 2.6946 | 2.4 |
| 4/20/2018 14:11 | 0.4  | 0.3  | 5.4  | 93.2  | 26.6 | 29.6 | 2.794  | 2.4 |
| 4/20/2018 14:12 | 0.3  | 0.6  | 5.7  | 93.9  | 27.2 | 30   | 2.8973 | 2.4 |
| 4/20/2018 14:13 | 0.3  | 0.4  | 5.7  | 88    | 25.6 | 30.3 | 3.0203 | 2.4 |
| 4/20/2018 14:14 | 0.3  | 0.3  | 6.6  | 89.5  | 25.8 | 30.7 | 3.1087 | 2.3 |
| 4/20/2018 14:15 | 0.3  | 0.7  | 5.2  | 88.2  | 25.4 | 31.1 | 3.0172 | 2.3 |
| 4/20/2018 14:16 | 0.3  | 0.3  | 4.4  | 88.4  | 25.5 | 31.2 | 2.9342 | 2.3 |
| 4/20/2018 14:17 | 0.2  | 0.1  | 4.8  | 85.3  | 25.1 | 31.4 | 2.873  | 2.2 |
| 4/20/2018 14:18 | 0.2  | -0.4 | 5.3  | 83.9  | 24.5 | 31.5 | 2.8148 | 2.2 |
| 4/20/2018 14:19 | 0.2  | 0.2  | 3.9  | 82.8  | 24.1 | 31.5 | 2.7417 | 2.1 |
| 4/20/2018 14:20 | 0.3  | 0.8  | 6    | 83.2  | 24.2 | 31.3 | 2.7743 | 2.1 |
| 4/20/2018 14:21 | 0.3  | 0.3  | 5.7  | 82    | 24.2 | 31.2 | 2.749  | 2.1 |
| 4/20/2018 14:22 | 0.2  | 0.3  | 5.9  | 80.7  | 23.8 | 31   | 2.7457 | 2.1 |
| 4/20/2018 14:23 | 0.2  | 0.3  | 5.8  | 79.7  | 23.5 | 30.9 | 2.7008 | 2.1 |
| 4/20/2018 14:24 | 0.2  | 0.1  | 4.6  | 80    | 23.6 | 30.8 | 2.7285 | 2.1 |

|                 |     |      |     |      |      |      |        |      |
|-----------------|-----|------|-----|------|------|------|--------|------|
| 4/20/2018 14:25 | 0.2 | 0.5  | 6.8 | 78.5 | 23.3 | 30.6 | 2.7008 | 2.1  |
| 4/20/2018 14:26 | 0.2 | 0.3  | 4.7 | 77.9 | 22.9 | 30.5 | 2.7037 | 2.1  |
| 4/20/2018 14:27 | 0.3 | -0.1 | 6   | 76.2 | 22.5 | 30.5 | 2.6697 | 2.1  |
| 4/20/2018 14:28 | 0.2 | 0.8  | 3.5 | 74   | 22   | 30.3 | 2.6395 | 2.1  |
| 4/20/2018 14:29 | 0.2 | 0.5  | 5.7 | 73.4 | 21.7 | 30.1 | 2.6372 | 2.2  |
| 4/20/2018 14:30 | 0.2 | 0.1  | 4.2 | 71   | 21.2 | 29.9 | 2.59   | 2.2  |
| 4/20/2018 14:31 | 0.2 | -0.1 | 5.4 | 66.5 | 20.3 | 29.6 | 2.498  | 2.1  |
| 4/20/2018 14:32 | 0.2 | 0.1  | 4.5 | 66.5 | 20   | 29.3 | 2.4848 | 2.1  |
| 4/20/2018 14:33 | 0.2 | 0.5  | 6.4 | 63.8 | 19.5 | 28.8 | 2.4655 | 2.1  |
| 4/20/2018 14:34 | 0.2 | 0.3  | 4.7 | 63.7 | 19.4 | 28.5 | 2.4455 | 2.1  |
| 4/20/2018 14:35 | 0.3 | 0.4  | 5.4 | 60.3 | 18.9 | 28   | 2.4168 | 2    |
| 4/20/2018 14:36 | 0.3 | 0.6  | 5.7 | 62.3 | 18.7 | 27.5 | 2.4167 | 2    |
| 4/20/2018 14:37 | 0.2 | 0.3  | 4.3 | 61.6 | 19   | 27.2 | 2.4693 | 2    |
| 4/20/2018 14:38 | 0.2 | 1.2  | 2.9 | 60.5 | 18.5 | 26.8 | 2.4072 | 2    |
| 4/20/2018 14:39 | 0.2 | 0.3  | 4.1 | 59.2 | 18.3 | 26.6 | 2.41   | 2    |
| 4/20/2018 14:40 | 0.2 | 0.4  | 5.2 | 59.5 | 17.8 | 26.4 | 2.426  | 2.1  |
| 4/20/2018 14:41 | 0.2 | 1    | 5   | 57.8 | 17.7 | 26.3 | 2.4163 | 2.1  |
| 4/20/2018 14:42 | 0.2 | 0.6  | 5.2 | 53.5 | 17   | 26.1 | 2.3185 | 2.1  |
| 4/20/2018 14:43 | 0.2 | 0.8  | 4.2 | 55.5 | 16.8 | 25.8 | 2.3202 | 2    |
| 4/20/2018 14:44 | 0.3 | 0.3  | 6   | 55.5 | 17.1 | 25.7 | 2.3563 | 2.1  |
| 4/20/2018 14:45 | 0.3 | 0.1  | 3.7 | 54.9 | 16.7 | 25.6 | 2.333  | 2.1  |
| 4/20/2018 14:46 | 0.3 | 1    | 4.4 | 54.7 | 16.6 | 25.5 | 2.3605 | 2.1  |
| 4/20/2018 14:47 | 0.2 | 0.5  | 4.9 | 54.6 | 16.5 | 25.3 | 2.3497 | 2.1  |
| 4/20/2018 14:48 | 0.2 | 1.3  | 4.3 | 54.5 | 16.6 | 25.2 | 2.371  | 2.1  |
| 4/20/2018 14:49 | 0.2 | 0.2  | 5.6 | 53.6 | 16.4 | 25   | 2.3405 | 2.1  |
| 4/20/2018 14:50 | 0.2 | 0.8  | 5   | 53.5 | 16.1 | 24.9 | 2.3325 | 2.2  |
| 4/20/2018 14:51 | 0.2 | 0.5  | 3.9 | 53.9 | 16.3 | 25   | 2.3283 | 2.1  |
| 4/20/2018 14:52 | 0.2 | 0.1  | 2.5 | 53.5 | 16.2 | 25   | 2.3318 | 2.1  |
| 4/20/2018 14:53 | 0.3 | 0.4  | 5.5 | 53.3 | 16   | 25   | 2.3162 | 2.1  |
| 4/20/2018 14:54 | 0.2 | 0.4  | 5.1 | 52.2 | 15.8 | 24.9 | 2.309  | 2    |
| 4/20/2018 14:55 | 0.2 | 0.7  | 3.9 | 51.8 | 15.5 | 24.8 | 2.3027 | 2.1  |
| 4/20/2018 14:56 | 0.2 | 0.5  | 3.4 | 51.1 | 15.3 | 24.7 | 2.2822 | 2.1  |
| 4/20/2018 14:57 | 0.2 | 0.3  | 6   | 49.8 | 15   | 24.6 | 2.2515 | 2.1  |
| 4/20/2018 14:58 | 0.2 | 0.6  | 3.8 | 49.5 | 14.8 | 24.4 | 2.2465 | 2.1  |
| 4/20/2018 14:59 | 0.2 | 0.8  | 3.9 | 48.6 | 14.7 | 24.3 | 2.2352 | 2    |
| 4/20/2018 15:00 | 0.2 | 0.5  | 3.5 | 45.8 | 14.7 | 24   | 2.1468 | 2    |
| 4/20/2018 15:01 | 0.2 | 0.5  | 2.8 | 42.3 | 14.1 | 23.6 | 2.0605 | 2.1  |
| 4/20/2018 15:02 | 0.3 | 1    | 3.7 | 41.5 | 13   | 23.1 | 1.9838 | 2.1  |
| 4/20/2018 15:03 | 0.3 | 0.7  | 3.7 | 41   | 12.7 | 22.6 | 1.1934 | 1.9  |
| 4/20/2018 15:04 | 0.3 | 0.9  | 3.9 | 39.9 | 12.4 | 22   | 0.1562 | 1.3  |
| 4/20/2018 15:05 | 0.3 | 0.6  | 3.7 | 36.7 | 11.6 | 21.4 | 0.1659 | 0.3  |
| 4/20/2018 15:06 | 0.3 | 1    | 3.5 | 35.1 | 11.1 | 20.5 | 0.1533 | 0    |
| 4/20/2018 15:07 | 0.3 | 1    | 4.1 | 39.8 | 11.7 | 19.7 | 0.1594 | 0    |
| 4/20/2018 15:08 | 0.5 | 2.6  | 3.2 | 33.6 | 11.4 | 19   | 0.1644 | 8.8  |
| 4/20/2018 15:09 | 1.8 | 6.9  | 4.7 | 28.6 | 9.6  | 17.8 | 0.1535 | 25   |
| 4/20/2018 15:10 | 3.6 | 9.8  | 5.8 | 27.3 | 9.2  | 16.1 | 0.1582 | 25.9 |
| 4/20/2018 15:11 | 5.6 | 10.5 | 6.6 | 27.7 | 8.6  | 14.2 | 0.1492 | 26.9 |

|                 |      |      |     |      |     |      |        |      |
|-----------------|------|------|-----|------|-----|------|--------|------|
| 4/20/2018 15:12 | 7    | 12   | 6   | 28   | 8.5 | 12.4 | 0.1606 | 28.2 |
| 4/20/2018 15:13 | 8.1  | 12.4 | 6.5 | 27.8 | 7.9 | 10.5 | 0.1463 | 7.9  |
| 4/20/2018 15:14 | 9.1  | 14   | 6.3 | 28   | 7.4 | 8.7  | 0.1501 | 0.3  |
| 4/20/2018 15:15 | 10   | 14.4 | 7.5 | 28.6 | 7.1 | 6.9  | 0.1337 | 0.1  |
| 4/20/2018 15:16 | 10.3 | 12.5 | 7.1 | 28   | 7.5 | 5.3  | 0.1509 | 0.1  |
| 4/20/2018 15:17 | 9.3  | 9.1  |     | 28.6 | 9.3 | 4    | 0.1419 | 1    |
| 4/20/2018 15:18 | 8.1  | 8.8  |     | 27.4 | 8.6 | 3.4  | 0.1776 | 1.6  |
| 4/20/2018 15:19 | 7.6  | 11.3 |     | 26.2 | 8   | 3.2  | 0.5512 | 1.7  |
| 4/20/2018 15:20 | 8    | 10.2 |     | 25.7 | 7.3 | 3    | 0.6023 | 1.7  |
| 4/20/2018 15:21 | 8.7  | 11.4 | 6.6 | 25.7 | 7.1 | 2.9  | 0.5313 | 1.6  |
| 4/20/2018 15:22 |      |      |     |      | 7.3 | 2.9  | 0.5332 | 1.6  |
| 4/20/2018 15:23 |      |      |     |      | 6.6 | 2.9  | 0.4854 | 1.6  |
| 4/20/2018 15:24 |      |      |     |      | 6.5 | 2.9  | 0.4662 | 1.6  |
| 4/20/2018 15:25 |      |      |     |      | 6.2 | 2.8  | 0.4284 | 1.6  |
| 4/20/2018 15:26 |      |      |     |      | 6.3 | 2.6  | 0.4471 | 1.6  |
| 4/20/2018 15:27 |      |      |     |      | 5.8 | 2.5  | 0.3913 | 1.6  |
| 4/20/2018 15:28 |      |      |     |      | 5.6 | 2.4  | 0.3789 | 1.6  |
| 4/20/2018 15:29 |      |      |     |      | 5.4 | 2.2  | 0.3483 | 1.6  |
| 4/20/2018 15:30 |      |      |     |      | 5.1 | 2.1  | 0.315  | 1.6  |
| 4/20/2018 15:31 |      |      |     |      | 4.9 | 2    | 0.2952 | 1.6  |
| 4/20/2018 15:32 |      |      |     |      | 4.6 | 1.8  | 0.2882 | 1.6  |
| 4/20/2018 15:33 |      |      |     |      | 4.3 | 1.7  | 0.2515 | 1.6  |
| 4/20/2018 15:34 |      |      |     |      | 4.1 | 1.6  | 0.2472 | 1.6  |
| 4/20/2018 15:35 |      |      |     |      | 4   | 1.5  | 0.2172 | 1.5  |
| 4/20/2018 15:36 |      |      |     |      | 4.2 | 1.4  | 0.2334 | 1.5  |
| 4/20/2018 15:37 |      |      |     |      | 4.1 | 1.3  | 0.2126 | 1.5  |
| 4/20/2018 15:38 |      |      |     |      | 4.2 | 1.2  | 0.2253 | 1.6  |
| 4/20/2018 15:39 |      |      |     |      | 4.8 | 1.2  | 0.2383 | 1.5  |
| 4/20/2018 15:40 |      |      |     |      | 5   | 1.2  | 0.2501 | 1.6  |
| 4/20/2018 15:41 |      |      |     |      | 4.8 | 1.2  | 0.2659 | 1.6  |
| 4/20/2018 15:42 |      |      |     |      | 4.9 | 1.3  | 0.2645 | 1.6  |
| 4/20/2018 15:43 |      |      |     |      | 4.8 | 1.4  | 0.2385 | 1.6  |
| 4/20/2018 15:44 |      |      |     |      | 4.8 | 1.4  | 0.214  | 1.6  |
| 4/20/2018 15:45 |      |      |     |      | 4.9 | 1.5  | 0.264  | 1.6  |
| 4/20/2018 15:46 |      |      |     |      | 4.8 | 1.6  | 0.2803 | 1.6  |
| 4/20/2018 15:47 |      |      |     |      | 4.5 | 1.7  | 0.2642 | 1.6  |
| 4/20/2018 15:48 |      |      |     |      | 4.3 | 1.7  | 0.2503 | 1.6  |
| 4/20/2018 15:49 |      |      |     |      | 4   | 1.7  | 0.2124 | 1.5  |
| 4/20/2018 15:50 |      |      |     |      | 3.9 | 1.6  | 0.225  | 1.5  |
| 4/20/2018 15:51 |      |      |     |      | 3.8 | 1.6  | 0.2102 | 1.5  |
| 4/20/2018 15:52 |      |      | 8.8 | 30.8 | 3.9 | 1.6  | 0.2044 | 1.5  |
| 4/20/2018 15:53 |      |      | 8.3 | 29.8 | 4.1 | 1.6  | 0.1996 | 1.5  |
| 4/20/2018 15:54 |      |      | 8.7 | 29   | 4.2 | 1.5  | 0.1879 | 1.5  |
| 4/20/2018 15:55 |      |      | 6.8 | 27.5 | 4.3 | 1.5  | 0.1984 | 1.6  |
| 4/20/2018 15:56 |      |      | 9.1 | 27.6 | 4.3 | 1.5  | 0.194  | 1.6  |
| 4/20/2018 15:57 |      |      | 7.6 | 28.1 | 4.4 | 1.5  | 0.1932 | 1.6  |
| 4/20/2018 15:58 |      |      | 8   | 28.2 | 4.3 | 1.5  | 0.1673 | 1.7  |

|                 |      |      |     |     |        |     |
|-----------------|------|------|-----|-----|--------|-----|
| 4/20/2018 15:59 | 8    | 29.3 | 4.1 | 1.5 | 0.1654 | 1.7 |
| 4/20/2018 16:00 | 9    | 30   | 3.9 | 1.4 | 0.1674 | 1.7 |
| 4/20/2018 16:01 | 9.2  | 30.7 | 3.9 | 1.4 | 0.151  | 1.6 |
| 4/20/2018 16:02 | 9.1  | 30.1 | 3.8 | 1.4 | 0.1618 | 1.7 |
| 4/20/2018 16:03 | 7.5  | 29.7 | 3.7 | 1.3 | 0.1527 | 1.7 |
| 4/20/2018 16:04 | 8.8  | 28.5 | 3.7 | 1.3 | 0.1538 | 1.7 |
| 4/20/2018 16:05 | 7.7  | 27.9 | 3.8 | 1.3 | 0.1712 | 1.7 |
| 4/20/2018 16:06 | 8.5  | 28.1 | 3.9 | 1.2 | 0.1468 | 1.8 |
| 4/20/2018 16:07 | 6.6  | 28.7 | 3.8 | 1.2 | 0.1573 | 1.9 |
| 4/20/2018 16:08 | 7    | 28   | 3.7 | 1.3 | 0.1666 | 2   |
| 4/20/2018 16:09 | 7.9  | 28.6 | 3.8 | 1.3 | 0.1382 | 1.9 |
| 4/20/2018 16:10 | 9    | 28.6 | 3.8 | 1.3 | 0.1647 | 1.9 |
| 4/20/2018 16:11 | 8.7  | 29.9 | 3.6 | 1.3 | 0.1547 | 2.1 |
| 4/20/2018 16:12 | 8.2  | 30.2 | 3.4 | 1.3 | 0.1388 | 2.1 |
| 4/20/2018 16:13 | 9    | 29.7 | 3.4 | 1.3 | 0.1569 | 2.1 |
| 4/20/2018 16:14 | 8.8  | 29.7 | 3.5 | 1.3 | 0.1533 | 2.3 |
| 4/20/2018 16:15 | 8.7  | 29.5 | 3.4 | 1.3 | 0.1514 | 2.3 |
| 4/20/2018 16:16 | 7.5  | 28.8 | 3.5 | 1.3 | 0.1555 | 2.4 |
| 4/20/2018 16:17 | 7.2  | 28   | 3.5 | 1.3 | 0.1417 | 2.5 |
| 4/20/2018 16:18 | 10.4 | 28.7 | 3.4 | 1.3 | 0.1604 | 2.3 |
| 4/20/2018 16:19 | 10.2 | 30.3 | 3.2 | 1.3 | 0.148  | 1.7 |
| 4/20/2018 16:20 | 9.4  | 31.9 | 3.1 | 1.3 | 0.1407 | 1.8 |
| 4/20/2018 16:21 | 9.7  | 32.6 | 3   | 1.3 | 0.145  | 2   |
| 4/20/2018 16:22 | 10.1 | 31.1 | 3.1 | 1.2 | 0.1355 | 2.2 |
| 4/20/2018 16:23 | 8.9  | 30.5 | 3.3 | 1.2 | 0.1492 | 2.2 |
| 4/20/2018 16:24 | 8    | 28.6 | 3.4 | 1.2 | 0.1558 | 2.1 |
| 4/20/2018 16:25 | 8.9  | 27.5 | 3.5 | 1.2 | 0.1485 | 2.2 |
| 4/20/2018 16:26 | 8.8  | 28.6 | 3.6 | 1.2 | 0.1563 | 2.1 |
| 4/20/2018 16:27 | 6.4  | 26.1 | 3.6 | 1.3 | 0.1388 | 2.1 |
| 4/20/2018 16:28 | 8.1  | 26   | 3.7 | 1.3 | 0.154  | 2.1 |
| 4/20/2018 16:29 | 6.6  | 26.3 | 3.6 | 1.4 | 0.1497 | 2   |
| 4/20/2018 16:30 | 6.4  | 26.4 | 3.6 | 1.4 | 0.1485 | 2   |
| 4/20/2018 16:31 | 6.5  | 25.7 | 3.6 | 1.5 | 0.163  | 2.2 |
| 4/20/2018 16:32 | 7    | 25.7 | 3.7 | 1.5 | 0.1528 | 2.3 |
| 4/20/2018 16:33 | 7.6  | 24.8 | 3.8 | 1.6 | 0.1568 | 2.4 |
| 4/20/2018 16:34 | 6.5  | 24.4 | 3.8 | 1.6 | 0.1651 | 2.5 |
| 4/20/2018 16:35 | 6.5  | 24.8 | 3.7 | 1.7 | 0.1535 | 2.5 |
| 4/20/2018 16:36 | 6.5  | 24.4 | 3.7 | 1.7 | 0.1707 | 2.5 |
| 4/20/2018 16:37 | 6.5  | 24.5 | 3.7 | 1.8 | 0.1601 | 2   |
| 4/20/2018 16:38 | 5    | 24.1 | 3.7 | 1.8 | 0.1623 | 2   |
| 4/20/2018 16:39 | 7.3  | 24.7 | 3.6 | 1.9 | 0.1813 | 2.1 |
| 4/20/2018 16:40 | 7.8  | 24.7 | 3.6 | 1.9 | 0.1602 | 2.2 |
| 4/20/2018 16:41 | 6.5  | 24.2 | 3.6 | 1.9 | 0.1744 | 2.3 |
| 4/20/2018 16:42 | 7.9  | 24.2 | 3.6 | 2   | 0.162  | 2.5 |
| 4/20/2018 16:43 | 5.8  | 24.1 | 3.6 | 2   | 0.1684 | 2.6 |
| 4/20/2018 16:44 | 6.4  | 23.9 | 3.6 | 2   | 0.1708 | 2.7 |
| 4/20/2018 16:45 | 6.1  | 23.4 | 3.6 | 2   | 0.1664 | 2.8 |



|                 |     |      |     |     |        |     |
|-----------------|-----|------|-----|-----|--------|-----|
| 4/20/2018 16:46 | 5.9 | 23.4 | 3.6 | 2.1 | 0.1816 | 2.7 |
| 4/20/2018 16:47 | 5.9 | 23.5 | 3.6 | 2.1 | 0.1767 | 2.1 |
| 4/20/2018 16:48 | 5.7 | 23.6 | 3.6 | 2.1 | 0.1723 | 2.1 |
| 4/20/2018 16:49 | 5.2 | 23.2 | 3.6 | 2.1 | 0.1786 | 2.3 |
| 4/20/2018 16:50 | 6.5 | 23   | 3.6 | 2.2 | 0.1616 | 2.5 |
| 4/20/2018 16:51 | 4   | 22.8 | 3.6 | 2.2 | 0.1761 | 2.4 |
| 4/20/2018 16:52 | 6.4 | 22.6 | 3.6 | 2.2 | 0.1799 | 2   |
| 4/20/2018 16:53 | 4.7 | 22.4 | 3.6 | 2.2 | 0.1681 | 2.1 |
| 4/20/2018 16:54 | 4.8 | 22.7 | 3.6 | 2.3 | 0.1785 | 2.4 |
| 4/20/2018 16:55 | 4.8 | 22.3 | 3.6 | 2.3 | 0.1644 | 2.6 |
| 4/20/2018 16:56 | 5.3 | 22.4 | 3.6 | 2.3 | 0.1775 | 2.5 |
| 4/20/2018 16:57 | 4.5 | 22.2 | 3.6 | 2.3 | 0.172  | 2.4 |
| 4/20/2018 16:58 | 5.1 | 22.1 | 3.6 | 2.3 | 0.1692 | 2.4 |
| 4/20/2018 16:59 | 4.5 | 21.8 | 3.6 | 2.4 | 0.1808 | 2.6 |
| 4/20/2018 17:00 | 6.2 | 21.9 | 3.6 | 2.4 | 0.1723 | 2.7 |
| 4/20/2018 17:01 | 5.9 | 22   | 3.6 | 2.4 | 0.1819 | 2.6 |
| 4/20/2018 17:02 | 5   | 22.1 | 3.6 | 2.4 | 0.1744 | 2.7 |
| 4/20/2018 17:03 | 4.4 | 21.5 | 3.6 | 2.5 | 0.1779 | 2.7 |
| 4/20/2018 17:04 | 4.7 | 21.5 | 3.4 | 2.5 | 0.1823 | 2.8 |
| 4/20/2018 17:05 | 5.9 | 21.6 | 3.4 | 2.5 | 0.1667 | 2.7 |
| 4/20/2018 17:06 | 4.7 | 21.4 | 3.4 | 2.5 | 0.1858 | 2.9 |
| 4/20/2018 17:07 | 4.4 | 21.3 | 3.4 | 2.5 | 0.1744 | 3.1 |
| 4/20/2018 17:08 | 4.9 | 21.6 | 3.4 | 2.5 | 0.1847 | 3.1 |
| 4/20/2018 17:09 | 3.3 | 21.3 | 3.4 | 2.5 | 0.1844 | 3.1 |
| 4/20/2018 17:10 | 5.1 | 21.3 | 3.4 | 2.5 | 0.1719 | 3.1 |
| 4/20/2018 17:11 | 3.2 | 21.1 | 3.4 | 2.6 | 0.1932 | 3.1 |
| 4/20/2018 17:12 | 5.1 | 20.9 | 3.4 | 2.6 | 0.1802 | 3.1 |
| 4/20/2018 17:13 | 4.5 | 20.9 | 3.4 | 2.6 | 0.1893 | 3.2 |
| 4/20/2018 17:14 | 5   | 21   | 3.4 | 2.6 | 0.1955 | 3.2 |
| 4/20/2018 17:15 | 4.4 | 20.8 | 3.4 | 2.6 | 0.1832 | 3.2 |
| 4/20/2018 17:16 | 4.9 | 20.9 | 3.4 | 2.7 | 0.1948 | 3.2 |
| 4/20/2018 17:17 | 4.5 | 20.6 | 3.4 | 2.7 | 0.1899 | 3.3 |
| 4/20/2018 17:18 | 3.7 | 20.6 | 3.4 | 2.7 | 0.1977 | 3.3 |
| 4/20/2018 17:19 | 4.5 | 20.6 | 3.4 | 2.7 | 0.1973 | 2.9 |
| 4/20/2018 17:20 | 4.3 | 20.8 | 3.4 | 2.7 | 0.1898 | 2.8 |
| 4/20/2018 17:21 | 3.8 | 20.7 | 3.3 | 2.7 | 0.2049 | 3   |
| 4/20/2018 17:22 | 4.2 | 20.7 | 3.4 | 2.8 | 0.1905 | 2.9 |
| 4/20/2018 17:23 | 4.1 | 20.7 | 3.4 | 2.8 | 0.21   | 2.9 |
| 4/20/2018 17:24 | 3.9 | 20.6 | 3.4 | 2.8 | 0.1966 | 2.8 |
| 4/20/2018 17:25 | 3.9 | 20.5 | 3.4 | 2.8 | 0.2013 | 2.9 |
| 4/20/2018 17:26 | 4   | 20.9 | 3.4 | 2.8 | 0.1985 | 2.7 |
| 4/20/2018 17:27 | 4   | 20.9 | 3.4 | 2.9 | 0.1977 | 2.8 |
| 4/20/2018 17:28 | 4.8 | 20.6 | 3.4 | 2.9 | 0.2098 | 3   |
| 4/20/2018 17:29 | 4.5 | 20.3 | 3.4 | 2.9 | 0.1919 | 3   |
| 4/20/2018 17:30 | 4.1 | 20.6 | 3.4 | 2.9 | 0.2052 | 3.1 |
| 4/20/2018 17:31 | 5   | 20.5 | 3.4 | 2.9 | 0.1962 | 3.2 |
| 4/20/2018 17:32 | 3.9 | 20.2 | 3.4 | 2.9 | 0.1998 | 3.2 |

|                 |     |      |     |     |        |     |
|-----------------|-----|------|-----|-----|--------|-----|
| 4/20/2018 17:33 | 2.2 | 20.3 | 3.4 | 2.9 | 0.195  | 3.2 |
| 4/20/2018 17:34 | 3   | 20.6 | 3.4 | 2.9 | 0.1893 | 3.1 |
| 4/20/2018 17:35 | 4.8 | 20.6 | 3.4 | 2.9 | 0.2051 | 2.7 |
| 4/20/2018 17:36 | 3.8 | 20.4 | 3.4 | 2.9 | 0.1915 | 2.4 |
| 4/20/2018 17:37 | 4.1 | 20.5 | 3.4 | 2.9 | 0.2103 | 2.5 |
| 4/20/2018 17:38 | 3.9 | 20.5 | 3.4 | 3   | 0.1957 | 2.8 |
| 4/20/2018 17:39 | 2.9 | 20.7 | 3.4 | 3   | 0.2004 | 2.8 |
| 4/20/2018 17:40 | 3.8 | 20.5 | 3.4 | 3   | 0.1948 | 2.9 |
| 4/20/2018 17:41 | 3.7 | 20.6 | 3.4 | 3   | 0.1969 | 3   |
| 4/20/2018 17:42 | 3.6 | 20.2 | 3.4 | 3   | 0.198  | 3.1 |
| 4/20/2018 17:43 | 2.7 | 20.2 | 3.4 | 3   | 0.1903 | 3.1 |
| 4/20/2018 17:44 | 3   | 20.3 | 3.4 | 3   | 0.2039 | 3.1 |
| 4/20/2018 17:45 | 3   | 20.7 | 3.4 | 3   | 0.196  | 3.1 |
| 4/20/2018 17:46 | 4.1 | 20.5 | 3.3 | 3   | 0.1989 | 3.1 |
| 4/20/2018 17:47 | 4   | 20.3 | 3.3 | 3   | 0.1894 | 3.2 |
| 4/20/2018 17:48 | 3.3 | 20.5 | 3.4 | 3   | 0.1894 | 3.2 |
| 4/20/2018 17:49 | 2.7 | 20.4 | 3.4 | 3   | 0.1974 | 3.2 |
| 4/20/2018 17:50 | 3.3 | 20.6 | 3.4 | 3   | 0.1908 | 3.2 |
| 4/20/2018 17:51 | 3.5 | 20.2 | 3.3 | 3   | 0.1961 | 2.6 |
| 4/20/2018 17:52 | 2.8 | 20.3 | 3.3 | 3.1 | 0.1865 | 2.9 |
| 4/20/2018 17:53 | 2.9 | 20.5 | 3.3 | 3.1 | 0.2023 | 3.1 |
| 4/20/2018 17:54 | 2.6 | 20.5 | 3.3 | 3.1 | 0.1845 | 3.2 |
| 4/20/2018 17:55 | 3.9 | 20.5 | 3.3 | 3.1 | 0.1984 | 3.3 |
| 4/20/2018 17:56 | 2   | 20.6 | 3.3 | 3.1 | 0.1919 | 3.4 |
| 4/20/2018 17:57 | 2.4 | 20.6 | 3.3 | 3.2 | 0.1947 | 3.5 |
| 4/20/2018 17:58 | 3.2 | 20.3 | 3.3 | 3.2 | 0.1971 | 3.5 |
| 4/20/2018 17:59 | 3.9 | 20.6 | 3.4 | 3.2 | 0.1809 | 3.4 |
| 4/20/2018 18:00 | 3.9 | 20.4 | 3.3 | 3.2 | 0.2013 | 3.4 |
| 4/20/2018 18:01 | 4.6 | 20.5 | 3.4 | 3.2 | 0.1823 | 3.4 |
| 4/20/2018 18:02 | 3.1 | 20.8 | 3.3 | 3.2 | 0.1893 | 3.2 |
| 4/20/2018 18:03 | 1.8 | 20.7 | 3.3 | 3.2 | 0.1912 | 3.1 |
| 4/20/2018 18:04 | 2.9 | 20.4 | 3.3 | 3.2 | 0.1837 | 3.3 |
| 4/20/2018 18:05 | 3.4 | 20.7 | 3.2 | 3.2 | 0.2002 | 3.3 |
| 4/20/2018 18:06 | 3.5 | 20.7 | 3.2 | 3.3 | 0.1797 | 3.3 |
| 4/20/2018 18:07 | 3.2 | 20.4 | 3.2 | 3.3 | 0.1927 | 3.3 |
| 4/20/2018 18:08 | 2.8 | 20.6 | 3.2 | 3.3 | 0.1823 | 3.2 |
| 4/20/2018 18:09 | 2.6 | 20.8 | 3.2 | 3.3 | 0.1909 | 3.1 |
| 4/20/2018 18:10 | 3.5 | 20.6 | 3.2 | 3.3 | 0.1791 | 3.2 |
| 4/20/2018 18:11 | 4.5 | 20.8 | 3.2 | 3.3 | 0.1845 | 3.2 |
| 4/20/2018 18:12 | 4.3 | 20.3 | 3.2 | 3.3 | 0.1889 | 3.2 |
| 4/20/2018 18:13 | 1.6 | 20.5 | 3.2 | 3.2 | 0.1858 | 3.1 |
| 4/20/2018 18:14 | 3.5 | 20.7 | 3.2 | 3.2 | 0.1949 | 3.1 |
| 4/20/2018 18:15 | 4   | 20.8 | 3.2 | 3.2 | 0.1771 | 3.1 |
| 4/20/2018 18:16 | 4.1 | 20.6 | 3.2 | 3.2 | 0.1902 | 3.1 |
| 4/20/2018 18:17 | 2.4 | 20.5 | 3.2 | 3.1 | 0.1774 | 3.1 |
| 4/20/2018 18:18 | 2.9 | 20.7 | 3.1 | 3.2 | 0.1887 | 3.2 |
| 4/20/2018 18:19 | 4.3 | 20.9 | 3.1 | 3.1 | 0.1768 | 3.1 |

|                 |     |      |     |     |        |     |
|-----------------|-----|------|-----|-----|--------|-----|
| 4/20/2018 18:20 | 4.7 | 20.9 | 3.2 | 3.1 | 0.1871 | 3.1 |
| 4/20/2018 18:21 | 2.9 | 20.8 | 3.1 | 3.2 | 0.1767 | 3   |
| 4/20/2018 18:22 | 2.3 | 20.7 | 3.1 | 3.2 | 0.1835 | 2.9 |
| 4/20/2018 18:23 | 3.1 | 20.7 | 3.2 | 3.2 | 0.1892 | 3.1 |
| 4/20/2018 18:24 | 3.7 | 20.9 | 3.2 | 3.3 | 0.1783 | 3.1 |
| 4/20/2018 18:25 | 1.9 | 20.9 | 3.2 | 3.3 | 0.1935 | 3   |
| 4/20/2018 18:26 | 3.2 | 20.6 | 3.2 | 3.3 | 0.1793 | 2.9 |
| 4/20/2018 18:27 | 4.5 | 20.8 | 3.2 | 3.3 | 0.1953 | 2.9 |
| 4/20/2018 18:28 |     | 20.6 | 3.1 | 3.3 | 0.1804 | 2.9 |
| 4/20/2018 18:29 | 2.6 | 20.7 | 3.2 | 3.3 | 0.1845 | 2.8 |
| 4/20/2018 18:30 | 3.1 | 20.8 | 3.2 | 3.3 | 0.1851 | 2.8 |
| 4/20/2018 18:31 | 2.5 | 20.7 | 3.2 | 3.3 | 0.185  | 2.9 |
| 4/20/2018 18:32 | 2.3 | 20.7 | 3.2 | 3.3 | 0.1874 | 2.8 |
| 4/20/2018 18:33 | 3.4 | 20.9 | 3.2 | 3.3 | 0.1678 | 2.7 |
| 4/20/2018 18:34 | 3   | 20.9 | 3.2 | 3.3 | 0.1903 | 2.8 |
| 4/20/2018 18:35 | 3.9 | 20.9 | 3.2 | 3.3 | 0.1812 | 2.9 |
| 4/20/2018 18:36 | 2.8 | 20.7 | 3.2 | 3.3 | 0.179  | 2.8 |
| 4/20/2018 18:37 | 3.3 | 21.2 | 3.2 | 3.3 | 0.1805 | 2.8 |
| 4/20/2018 18:38 | 3.8 | 20.7 | 3.2 | 3.3 | 0.1769 | 2.7 |
| 4/20/2018 18:39 | 4.3 | 20.6 | 3.2 | 3.3 | 0.1878 | 2.8 |
| 4/20/2018 18:40 | 3.9 | 20.9 | 3.2 | 3.3 | 0.1746 | 2.9 |
| 4/20/2018 18:41 | 3.4 | 20.9 | 3.2 | 3.3 | 0.1852 | 2.8 |
| 4/20/2018 18:42 |     | 20.7 | 3.2 | 3.3 | 0.175  | 2.5 |
| 4/20/2018 18:43 |     | 20.8 | 3.2 | 3.3 | 0.1847 | 2.6 |
| 4/20/2018 18:44 |     | 20.8 | 3.2 | 3.3 | 0.1833 | 2.8 |
| 4/20/2018 18:45 |     | 21   | 3.2 | 3.3 | 0.1873 | 2.8 |
| 4/20/2018 18:46 | 4.6 | 21.2 | 3.2 | 3.2 | 0.1815 | 2.8 |
| 4/20/2018 18:47 | 6.6 | 21.1 | 3.2 | 3.2 | 0.1764 | 2.8 |
| 4/20/2018 18:48 |     | 21   | 3.2 | 3.2 | 0.184  | 2.4 |
| 4/20/2018 18:49 | 2   | 21.2 | 3.2 | 3.2 | 0.1749 | 2.4 |
| 4/20/2018 18:50 | 3.2 | 20.9 | 3.2 | 3.2 | 0.1848 | 2.6 |
| 4/20/2018 18:51 | 3.9 | 21.2 | 3.2 | 3.2 | 0.175  | 2.7 |
| 4/20/2018 18:52 | 4.8 | 21   | 3.2 | 3.2 | 0.1905 | 2.7 |
| 4/20/2018 18:53 | 3.5 | 21.1 | 3.2 | 3.2 | 0.1726 | 2.9 |
| 4/20/2018 18:54 | 3.2 | 21   | 3.2 | 3.3 | 0.1813 | 3   |
| 4/20/2018 18:55 | 3.3 | 21   | 3.2 | 3.3 | 0.1791 | 3.1 |
| 4/20/2018 18:56 | 3.9 | 21.2 | 3.2 | 3.3 | 0.173  | 3.1 |
| 4/20/2018 18:57 | 3   | 20.9 | 3.2 | 3.3 | 0.1842 | 3.1 |
| 4/20/2018 18:58 | 3.1 | 21   | 3.2 | 3.4 | 0.1689 | 3.1 |
| 4/20/2018 18:59 | 2.2 | 21.1 | 3.2 | 3.4 | 0.1829 | 2.6 |
| 4/20/2018 19:00 | 3.5 | 21   | 3.2 | 3.4 | 0.1626 | 2.7 |
| 4/20/2018 19:01 | 3.1 | 20.7 | 3.2 | 3.4 | 0.189  | 3   |
| 4/20/2018 19:02 | 3.2 | 21   | 3.2 | 3.4 | 0.1709 | 3.2 |
| 4/20/2018 19:03 | 3.8 | 21.2 | 3.2 | 3.4 | 0.1795 | 3.1 |
| 4/20/2018 19:04 | 3.5 | 21   | 3.3 | 3.4 | 0.1786 | 3.2 |
| 4/20/2018 19:05 | 4   | 21.1 | 3.2 | 3.4 | 0.165  | 3.1 |
| 4/20/2018 19:06 | 2.6 | 21.3 | 3.1 | 3.3 | 0.1754 | 2.8 |

|                 |     |      |     |     |        |     |
|-----------------|-----|------|-----|-----|--------|-----|
| 4/20/2018 19:07 | 1.8 | 21.1 | 3.1 | 3.3 | 0.1622 | 2.8 |
| 4/20/2018 19:08 | 3.2 | 21.1 | 3.1 | 3.3 | 0.18   | 3   |
| 4/20/2018 19:09 | 3.8 | 21   | 3.1 | 3.3 | 0.1671 | 3.2 |
| 4/20/2018 19:10 | 2.6 | 20.9 | 3.1 | 3.3 | 0.1725 | 3.2 |
| 4/20/2018 19:11 | 4.2 | 20.9 | 3.1 | 3.3 | 0.1741 | 3.2 |
| 4/20/2018 19:12 | 4.5 | 21.2 | 3.1 | 3.3 | 0.1753 | 3   |
| 4/20/2018 19:13 | 2.1 | 21.1 | 3.1 | 3.3 | 0.1784 | 2.8 |
| 4/20/2018 19:14 | 4.1 | 21.5 | 3.1 | 3.3 | 0.1651 | 3   |
| 4/20/2018 19:15 | 4.7 | 21.2 | 3.1 | 3.4 | 0.1805 | 3   |
| 4/20/2018 19:16 | 4   | 21.3 | 3.1 | 3.4 | 0.1702 | 3   |
| 4/20/2018 19:17 | 4.7 | 21.2 | 3.1 | 3.4 | 0.1753 | 2.8 |
| 4/20/2018 19:18 | 3   | 21   | 3.1 | 3.4 | 0.1704 | 2.7 |
| 4/20/2018 19:19 | 2.9 | 21   | 3.1 | 3.3 | 0.1746 | 2.6 |
| 4/20/2018 19:20 | 4.4 | 21.1 | 3.1 | 3.4 | 0.1739 | 2.2 |
| 4/20/2018 19:21 | 3.6 | 20.9 | 3.1 | 3.4 | 0.1596 | 2.4 |
| 4/20/2018 19:22 | 3   | 21.3 | 3.1 | 3.4 | 0.1808 | 2.6 |
| 4/20/2018 19:23 | 2.8 | 21.1 | 3.1 | 3.4 | 0.1652 | 2.7 |
| 4/20/2018 19:24 | 3   | 21.1 | 3.1 | 3.3 | 0.1784 | 2.8 |
| 4/20/2018 19:25 | 2.7 | 20.9 | 3.1 | 3.3 | 0.1655 | 2.7 |
| 4/20/2018 19:26 | 4.2 | 21.3 | 3.1 | 3.3 | 0.172  | 2.8 |
| 4/20/2018 19:27 | 3.9 | 21.4 | 3.1 | 3.3 | 0.1764 | 2.9 |
| 4/20/2018 19:28 | 3.3 | 21   | 3.1 | 3.3 | 0.1643 | 2.8 |
| 4/20/2018 19:29 | 2.2 | 21.3 | 3.1 | 3.3 | 0.1692 | 2.7 |
| 4/20/2018 19:30 | 2.6 | 21.5 | 3.1 | 3.3 | 0.1594 | 2.4 |
| 4/20/2018 19:31 | 3   | 21.1 | 3.1 | 3.3 | 0.1736 | 2   |
| 4/20/2018 19:32 | 3.4 | 21.3 | 3.1 | 3.3 | 0.163  | 2.1 |
| 4/20/2018 19:33 | 4   | 21.4 | 3.1 | 3.3 | 0.167  | 2.4 |
| 4/20/2018 19:34 | 2.9 | 21.4 | 3.1 | 3.3 | 0.1746 | 2.7 |
| 4/20/2018 19:35 | 4.4 | 21.5 | 3.1 | 3.3 | 0.1655 | 2.9 |
| 4/20/2018 19:36 | 4.3 | 21.2 | 3.1 | 3.3 | 0.1714 | 2.9 |
| 4/20/2018 19:37 | 4   | 21.5 | 3.1 | 3.3 | 0.1623 | 2.9 |
| 4/20/2018 19:38 | 4   | 21.6 | 3.2 | 3.3 | 0.1798 | 2.8 |
| 4/20/2018 19:39 | 4.2 | 21.3 | 3.1 | 3.3 | 0.1592 | 2.6 |
| 4/20/2018 19:40 | 4.4 | 21.4 | 3.2 | 3.3 | 0.1807 | 2.5 |
| 4/20/2018 19:41 | 3.5 | 21.3 | 3.1 | 3.3 | 0.1653 | 2.3 |
| 4/20/2018 19:42 | 4.2 | 21.3 | 3.2 | 3.3 | 0.1699 | 2.2 |
| 4/20/2018 19:43 | 4   | 21.3 | 3.2 | 3.3 | 0.169  | 2.4 |
| 4/20/2018 19:44 | 3.1 | 21.2 | 3.2 | 3.3 | 0.1645 | 2.6 |
| 4/20/2018 19:45 | 1.4 | 21.5 | 3.2 | 3.3 | 0.1702 | 2.8 |
| 4/20/2018 19:46 | 2.8 | 21.4 | 3.2 | 3.3 | 0.1557 | 2.8 |
| 4/20/2018 19:47 | 4   | 21.2 | 3.2 | 3.3 | 0.1785 | 2.6 |
| 4/20/2018 19:48 | 2.9 | 21.2 | 3.2 | 3.3 | 0.1604 | 2.3 |
| 4/20/2018 19:49 | 3.7 | 21.4 | 3.2 | 3.4 | 0.1719 | 2.3 |
| 4/20/2018 19:50 | 3.9 | 21.2 | 3.2 | 3.4 | 0.1653 | 2.5 |
| 4/20/2018 19:51 | 3.6 | 21.3 | 3.2 | 3.4 | 0.1659 | 2.6 |
| 4/20/2018 19:52 | 2.4 | 21.4 | 3.2 | 3.3 | 0.1751 | 2.8 |
| 4/20/2018 19:53 | 3.1 | 21.2 | 3.2 | 3.3 | 0.1604 | 2.8 |

|                 |     |      |     |     |        |     |
|-----------------|-----|------|-----|-----|--------|-----|
| 4/20/2018 19:54 | 3.5 | 21.6 | 3.2 | 3.4 | 0.1744 | 2.8 |
| 4/20/2018 19:55 | 2.4 | 21.3 | 3.2 | 3.4 | 0.1545 | 2.9 |
| 4/20/2018 19:56 | 3   | 21   | 3.2 | 3.4 | 0.1785 | 3   |
| 4/20/2018 19:57 | 2.8 | 21.2 | 3.2 | 3.4 | 0.166  | 2.8 |
| 4/20/2018 19:58 | 3.6 | 21.1 | 3.2 | 3.3 | 0.1683 | 2   |
| 4/20/2018 19:59 | 2   | 21.5 | 3.2 | 3.4 | 0.1697 | 1.9 |
| 4/20/2018 20:00 | 3.8 | 21.4 | 3.2 | 3.4 | 0.1579 | 2   |
| 4/20/2018 20:01 | 4.2 | 21.2 | 3.2 | 3.4 | 0.1716 | 2.1 |
| 4/20/2018 20:02 | 4   | 21.3 | 3.2 | 3.4 | 0.16   | 2.3 |
| 4/20/2018 20:03 | 3.7 | 21.3 | 3.2 | 3.4 | 0.1727 | 2.4 |
| 4/20/2018 20:04 | 4.6 | 21.2 | 3.2 | 3.3 | 0.1618 | 2.5 |
| 4/20/2018 20:05 | 1.9 | 21.2 | 3.2 | 3.3 | 0.1638 | 2.7 |
| 4/20/2018 20:06 | 2.8 | 21.6 | 3.2 | 3.4 | 0.168  | 2.8 |
| 4/20/2018 20:07 | 3   | 21.1 | 3.1 | 3.4 | 0.1683 | 2.9 |
| 4/20/2018 20:08 | 4.3 | 21.4 | 3.1 | 3.4 | 0.171  | 2.9 |
| 4/20/2018 20:09 | 3.8 | 21.2 | 3.1 | 3.4 | 0.1588 | 2.9 |
| 4/20/2018 20:10 | 2.4 | 21.4 | 3.1 | 3.4 | 0.1725 | 2.8 |
| 4/20/2018 20:11 | 3.2 | 21.4 | 3.1 | 3.4 | 0.1586 | 2.8 |
| 4/20/2018 20:12 | 3.4 | 21.2 | 3.1 | 3.4 | 0.1768 | 2.7 |
| 4/20/2018 20:13 | 3   | 21.2 | 3.1 | 3.4 | 0.1642 | 2.7 |
| 4/20/2018 20:14 | 3   | 21.5 | 3.1 | 3.4 | 0.1613 | 2.8 |
| 4/20/2018 20:15 | 4.9 | 21.4 | 3.1 | 3.4 | 0.174  | 2.7 |
| 4/20/2018 20:16 | 3.3 | 21.3 | 3.1 | 3.4 | 0.1581 | 2.8 |
| 4/20/2018 20:17 | 3.7 | 21.2 | 3.1 | 3.3 | 0.1734 | 2.8 |
| 4/20/2018 20:18 | 3.6 | 21.3 | 3.1 | 3.3 | 0.1637 | 2.9 |
| 4/20/2018 20:19 | 3.4 | 21.4 | 3.1 | 3.3 | 0.1687 | 3   |
| 4/20/2018 20:20 | 3   | 21.3 | 3.1 | 3.3 | 0.1623 | 3   |
| 4/20/2018 20:21 | 4.2 | 21.4 | 3.1 | 3.3 | 0.156  | 2.9 |
| 4/20/2018 20:22 | 2.6 | 21.1 | 3.1 | 3.3 | 0.1722 | 2.8 |
| 4/20/2018 20:23 | 3.8 | 21.1 | 3.1 | 3.3 | 0.1556 | 2.8 |
| 4/20/2018 20:24 | 3.2 | 21.2 | 3.1 | 3.3 | 0.1671 | 2.9 |
| 4/20/2018 20:25 | 3.8 | 21.3 | 3.1 | 3.3 | 0.1538 | 3.1 |
| 4/20/2018 20:26 | 2.8 | 21.2 | 3.1 | 3.3 | 0.1662 | 3.2 |
| 4/20/2018 20:27 | 3.1 | 21.4 | 3.2 | 3.3 | 0.1622 | 3.1 |
| 4/20/2018 20:28 | 3.5 | 21.3 | 3.2 | 3.3 | 0.1545 | 3.1 |
| 4/20/2018 20:29 | 4.1 | 21.5 | 3.2 | 3.3 | 0.1718 | 3.1 |
| 4/20/2018 20:30 | 2.8 | 21.4 | 3.1 | 3.3 | 0.1577 | 3.1 |
| 4/20/2018 20:31 | 3   | 21   | 3.1 | 3.3 | 0.173  | 3   |
| 4/20/2018 20:32 | 3.4 | 21.4 | 3.1 | 3.4 | 0.1588 | 2.7 |
| 4/20/2018 20:33 | 3.1 | 21.5 | 3.1 | 3.3 | 0.1591 | 2.7 |
| 4/20/2018 20:34 | 4.3 | 21.4 | 3.1 | 3.3 | 0.1624 | 2.9 |
| 4/20/2018 20:35 | 3.9 | 21.4 | 3.2 | 3.3 | 0.1503 | 3.1 |
| 4/20/2018 20:36 | 3.3 | 21.5 | 3.1 | 3.3 | 0.1678 | 3.1 |
| 4/20/2018 20:37 | 2.8 | 21.4 | 3.2 | 3.3 | 0.1606 | 3.3 |
| 4/20/2018 20:38 | 3.6 | 21.5 | 3.1 | 3.3 | 0.1723 | 3.3 |
| 4/20/2018 20:39 | 3.2 | 21.4 | 3.1 | 3.3 | 0.1611 | 2.9 |
| 4/20/2018 20:40 | 2.8 | 21.6 | 3.2 | 3.3 | 0.17   | 2.4 |

|                 |     |      |     |     |        |     |
|-----------------|-----|------|-----|-----|--------|-----|
| 4/20/2018 20:41 | 3.8 | 21.2 | 3.2 | 3.3 | 0.1614 | 2.5 |
| 4/20/2018 20:42 | 1.9 | 21.2 | 3.2 | 3.3 | 0.1681 | 2.7 |
| 4/20/2018 20:43 | 2.5 | 21.4 | 3.2 | 3.3 | 0.1698 | 2.9 |
| 4/20/2018 20:44 | 2.3 | 21.2 | 3.2 | 3.3 | 0.1604 | 2.8 |
| 4/20/2018 20:45 | 2.6 | 21.3 | 3.2 | 3.4 | 0.1699 | 2.3 |
| 4/20/2018 20:46 | 3.7 | 21.4 | 3.2 | 3.4 | 0.1604 | 2.2 |
| 4/20/2018 20:47 | 3.9 | 21.3 | 3.2 | 3.4 | 0.1734 | 2.1 |
| 4/20/2018 20:48 | 2.9 | 21.3 | 3.2 | 3.4 | 0.1624 | 1.8 |
| 4/20/2018 20:49 | 3.6 | 21.3 | 3.2 | 3.4 | 0.1682 | 1.7 |
| 4/20/2018 20:50 | 3   | 21.4 | 3.2 | 3.4 | 0.1657 | 1.8 |
| 4/20/2018 20:51 | 3.5 | 21.3 | 3.3 | 3.4 | 0.1534 | 1.9 |
| 4/20/2018 20:52 | 2.7 | 21.2 | 3.3 | 3.4 | 0.1753 | 2.1 |
| 4/20/2018 20:53 | 2.8 | 21.4 | 3.3 | 3.4 | 0.1537 | 2.3 |
| 4/20/2018 20:54 | 3.2 | 21.4 | 3.3 | 3.4 | 0.1669 | 2.4 |
| 4/20/2018 20:55 | 3.6 | 21.3 | 3.3 | 3.3 | 0.1571 | 2.3 |
| 4/20/2018 20:56 | 1.3 | 21.4 | 3.3 | 3.3 | 0.1643 | 2.1 |
| 4/20/2018 20:57 | 3.2 | 21.2 | 3.3 | 3.3 | 0.1607 | 2.5 |
| 4/20/2018 20:58 | 3.5 | 21.4 | 3.3 | 3.3 | 0.1633 | 2.7 |
| 4/20/2018 20:59 | 5   | 21.5 | 3.4 | 3.3 | 0.1653 | 3   |
| 4/20/2018 21:00 | 3.8 | 21.3 | 3.4 | 3.3 | 0.1502 | 3.2 |
| 4/20/2018 21:01 | 4.3 | 21.4 | 3.4 | 3.3 | 0.1694 | 3.4 |
| 4/20/2018 21:02 | 4   | 21.4 | 3.4 | 3.3 | 0.1618 | 3.2 |
| 4/20/2018 21:03 | 2.4 | 21.1 | 3.4 | 3.3 | 0.1701 | 2.9 |
| 4/20/2018 21:04 | 3.3 | 21.3 | 3.5 | 3.3 | 0.1678 | 3.2 |
| 4/20/2018 21:05 | 4.2 | 21.1 | 3.7 | 3.3 | 0.1618 | 3.3 |
| 4/20/2018 21:06 | 2.3 | 21.1 | 3.7 | 3.3 | 0.1639 | 3.3 |
| 4/20/2018 21:07 | 3.1 | 21.2 | 3.7 | 3.3 | 0.162  | 3.4 |
| 4/20/2018 21:08 | 2.4 | 21.4 | 3.5 | 3.3 | 0.168  | 3.2 |
| 4/20/2018 21:09 | 3.9 | 21   | 3.4 | 3.3 | 0.1546 | 2.4 |
| 4/20/2018 21:10 | 4.5 | 21.3 | 3.6 | 3.3 | 0.1743 | 2.6 |
| 4/20/2018 21:11 | 3.7 | 21.2 | 3.6 | 3.2 | 0.1565 | 2.4 |
| 4/20/2018 21:12 | 4.1 | 21.3 | 3.6 | 3.2 | 0.165  | 1.9 |
| 4/20/2018 21:13 | 3.8 | 21.5 | 3.5 | 3.3 | 0.165  | 2.2 |
| 4/20/2018 21:14 | 3.4 | 21.2 | 3.6 | 3.3 | 0.155  | 2.4 |
| 4/20/2018 21:15 | 2.8 | 21   | 3.6 | 3.3 | 0.1686 | 2.3 |
| 4/20/2018 21:16 | 3.4 | 21.3 | 3.6 | 3.3 | 0.1573 | 2.5 |
| 4/20/2018 21:17 | 3.9 | 21.3 | 3.7 | 3.3 | 0.1631 | 2.7 |
| 4/20/2018 21:18 | 2.4 | 21.2 | 3.6 | 3.3 | 0.1662 | 2.8 |
| 4/20/2018 21:19 | 3.6 | 21.1 | 3.7 | 3.3 | 0.1596 | 2.8 |
| 4/20/2018 21:20 | 4.3 | 21.2 | 3.6 | 3.3 | 0.17   | 2.8 |
| 4/20/2018 21:21 | 7.4 | 21.1 | 3.7 | 3.3 | 0.1595 | 2.8 |
| 4/20/2018 21:22 | 5.6 | 21.1 | 3.7 | 3.3 | 0.1695 | 2.7 |
| 4/20/2018 21:23 | 4   | 21.1 | 3.7 | 3.4 | 0.1533 | 2.7 |
| 4/20/2018 21:24 | 2.3 | 21.2 | 3.7 | 3.3 | 0.1728 | 2.8 |
| 4/20/2018 21:25 | 2.8 | 21.2 | 3.9 | 3.3 | 0.1582 | 2.9 |
| 4/20/2018 21:26 | 3.6 | 21.4 | 3.7 | 3.4 | 0.1657 | 3   |
| 4/20/2018 21:27 | 2.4 | 21.1 | 3.7 | 3.3 | 0.1612 | 2.9 |

|                 |      |      |     |     |        |     |
|-----------------|------|------|-----|-----|--------|-----|
| 4/20/2018 21:28 | 4.1  | 21.2 | 3.9 | 3.3 | 0.1594 | 3   |
| 4/20/2018 21:29 | 2.5  | 21   | 3.8 | 3.3 | 0.1667 | 2.9 |
| 4/20/2018 21:30 |      | 21   | 3.8 | 3.3 | 0.1579 | 2.7 |
| 4/20/2018 21:31 |      | 21.2 | 4   | 3.3 | 0.1695 | 2.7 |
| 4/20/2018 21:32 |      | 21.1 | 4   | 3.3 | 0.1538 | 2.6 |
| 4/20/2018 21:33 | 4.2  | 21   | 4.1 | 3.3 | 0.1647 | 2.6 |
| 4/20/2018 21:34 |      | 20.7 | 4   | 3.3 | 0.1647 | 2.9 |
| 4/20/2018 21:35 | 6.9  | 20.9 | 4.2 | 3.3 | 0.1617 | 3   |
| 4/20/2018 21:36 |      | 21.2 | 4.8 | 3.3 | 0.1698 | 3.2 |
| 4/20/2018 21:37 | 4.2  | 21.1 | 4.5 | 3.3 | 0.1581 | 3.2 |
| 4/20/2018 21:38 | 10.5 | 20.9 | 4.3 | 3.3 | 0.1695 | 3.2 |
| 4/20/2018 21:39 | 3.8  | 21   | 4.2 | 3.3 | 0.1634 | 3.2 |
| 4/20/2018 21:40 | 2.7  | 20.9 | 4.3 | 3.3 | 0.1685 | 3.1 |
| 4/20/2018 21:41 | 4.4  | 20.9 | 4.6 | 3.3 | 0.1586 | 3.1 |
| 4/20/2018 21:42 | 3.4  | 20.9 | 4.3 | 3.3 | 0.1734 | 3   |
| 4/20/2018 21:43 | 3.5  | 21   | 4.8 | 3.3 | 0.1679 | 2.5 |
| 4/20/2018 21:44 | 3.3  | 21   | 4.6 | 3.3 | 0.1582 | 2.6 |
| 4/20/2018 21:45 | 4.2  | 21   | 4.4 | 3.3 | 0.1635 | 2.7 |
| 4/20/2018 21:46 | 2.5  | 20.9 | 4.4 | 3.3 | 0.1574 | 2.9 |
| 4/20/2018 21:47 | 3.2  | 21.1 | 4.5 | 3.3 | 0.168  | 2.9 |
| 4/20/2018 21:48 | 2.6  | 21.2 | 4.4 | 3.3 | 0.1602 | 3   |
| 4/20/2018 21:49 | 3.4  | 21   | 4.3 | 3.3 | 0.1651 | 3   |
| 4/20/2018 21:50 | 4    | 21   | 4.4 | 3.3 | 0.1649 | 3   |
| 4/20/2018 21:51 | 5.1  | 21   | 4.4 | 3.3 | 0.1622 | 3.2 |
| 4/20/2018 21:52 | 3.1  | 21   | 4.4 | 3.3 | 0.1689 | 3.1 |
| 4/20/2018 21:53 | 3    | 21.1 | 4.5 | 3.3 | 0.1632 | 2.7 |
| 4/20/2018 21:54 | 1.8  | 21   | 4.4 | 3.3 | 0.1712 | 3.1 |
| 4/20/2018 21:55 | 4.7  | 21.4 | 4.5 | 3.3 | 0.1614 | 3.2 |
| 4/20/2018 21:56 | 4.3  | 20.9 | 4.5 | 3.3 | 0.1753 | 3   |
| 4/20/2018 21:57 | 3.3  | 21   | 4.5 | 3.3 | 0.1642 | 2.8 |
| 4/20/2018 21:58 | 3.3  | 21   | 4.5 | 3.3 | 0.1627 | 3   |
| 4/20/2018 21:59 | 2.6  | 21.1 | 4.5 | 3.3 | 0.1673 | 2.9 |
| 4/20/2018 22:00 | 2.7  | 21.2 | 4.4 | 3.3 | 0.1618 | 2.9 |
| 4/20/2018 22:01 | 3.1  | 20.9 | 4.4 | 3.3 | 0.1724 | 2.9 |
| 4/20/2018 22:02 | 4.8  | 21.1 | 4.4 | 3.3 | 0.1639 | 2.9 |
| 4/20/2018 22:03 | 3.8  | 20.9 | 4.5 | 3.3 | 0.1746 | 2.9 |
| 4/20/2018 22:04 | 3.2  | 20.9 | 4.5 | 3.3 | 0.1638 | 2.9 |
| 4/20/2018 22:05 | 3.8  | 21   | 4.5 | 3.3 | 0.167  | 2.8 |
| 4/20/2018 22:06 | 2.4  | 21.1 | 4.5 | 3.3 | 0.1653 | 2.7 |
| 4/20/2018 22:07 | 3.9  | 21.3 | 4.5 | 3.3 | 0.1591 | 2.7 |
| 4/20/2018 22:08 | 3.8  | 21.2 | 4.5 | 3.3 | 0.1704 | 2.4 |
| 4/20/2018 22:09 | 2.9  | 21   | 4.4 | 3.3 | 0.1577 | 1.9 |
| 4/20/2018 22:10 | 3.7  | 20.9 | 4.3 | 3.3 | 0.1672 | 1.9 |
| 4/20/2018 22:11 | 4.1  | 21   | 4.3 | 3.3 | 0.1605 | 2.1 |
| 4/20/2018 22:12 | 4.4  | 21.1 | 4.3 | 3.3 | 0.1639 | 2.3 |
| 4/20/2018 22:13 | 2    | 20.9 | 4.2 | 3.3 | 0.1739 | 2.4 |
| 4/20/2018 22:14 | 3.2  | 21.1 | 4.2 | 3.3 | 0.1577 | 2.6 |

|                 |     |      |     |     |        |     |
|-----------------|-----|------|-----|-----|--------|-----|
| 4/20/2018 22:15 | 2.5 | 21   | 4.2 | 3.3 | 0.1778 | 2.5 |
| 4/20/2018 22:16 | 2.6 | 21   | 4.2 | 3.3 | 0.1621 | 2.8 |
| 4/20/2018 22:17 | 2.1 | 20.9 | 4.3 | 3.4 | 0.169  | 2.9 |
| 4/20/2018 22:18 | 5   | 21   | 4.3 | 3.4 | 0.1565 | 3   |
| 4/20/2018 22:19 | 3.7 | 20.9 | 4.2 | 3.4 | 0.1645 | 3.1 |
| 4/20/2018 22:20 | 3.2 | 21.2 | 4.2 | 3.4 | 0.1737 | 3.1 |
| 4/20/2018 22:21 | 2.9 | 20.9 | 4.2 | 3.4 | 0.1547 | 3.1 |
| 4/20/2018 22:22 | 4.4 | 21   | 4.2 | 3.4 | 0.1704 | 3.2 |
| 4/20/2018 22:23 | 2.6 | 21.1 | 4.2 | 3.4 | 0.1559 | 3.2 |
| 4/20/2018 22:24 | 2.9 | 21.2 | 4.2 | 3.4 | 0.1674 | 3.2 |
| 4/20/2018 22:25 | 3.8 | 20.8 | 4.2 | 3.4 | 0.1544 | 3.1 |
| 4/20/2018 22:26 | 3.1 | 21   | 4.2 | 3.4 | 0.1644 | 3.1 |
| 4/20/2018 22:27 | 2.4 | 21.1 | 4.3 | 3.4 | 0.1732 | 3   |
| 4/20/2018 22:28 | 3.4 | 20.9 | 4.3 | 3.4 | 0.1588 | 2.7 |
| 4/20/2018 22:29 | 3.4 | 20.8 | 4.3 | 3.4 | 0.1693 | 2.7 |
| 4/20/2018 22:30 | 3.8 | 20.9 | 4.4 | 3.4 | 0.1567 | 2.9 |
| 4/20/2018 22:31 | 4.3 | 20.8 | 4.5 | 3.3 | 0.1674 | 3   |
| 4/20/2018 22:32 | 4.2 | 20.9 | 4.4 | 3.3 | 0.1657 | 2.9 |
| 4/20/2018 22:33 | 2.9 | 20.8 | 4.4 | 3.3 | 0.1627 | 2.8 |
| 4/20/2018 22:34 | 2.8 | 20.7 | 4.4 | 3.3 | 0.1703 | 2.9 |
| 4/20/2018 22:35 | 4.5 | 21   | 4.5 | 3.3 | 0.1566 | 2.9 |
| 4/20/2018 22:36 | 4.1 | 20.7 | 4.6 | 3.3 | 0.1722 | 2.9 |
| 4/20/2018 22:37 | 4.2 | 20.5 | 4.6 | 3.3 | 0.1633 | 2.9 |
| 4/20/2018 22:38 | 3.7 | 20.8 | 4.5 | 3.3 | 0.1648 | 2.8 |
| 4/20/2018 22:39 | 2.3 | 20.7 | 4.7 | 3.3 | 0.1695 | 2.8 |
| 4/20/2018 22:40 | 4.7 | 20.8 | 4.6 | 3.3 | 0.1569 | 2.9 |
| 4/20/2018 22:41 | 2.3 | 20.7 | 4.6 | 3.4 | 0.1701 | 2.9 |
| 4/20/2018 22:42 | 3.1 | 20.9 | 4.5 | 3.4 | 0.1523 | 2.9 |
| 4/20/2018 22:43 | 2.9 | 20.7 | 4.5 | 3.4 | 0.1701 | 2.8 |
| 4/20/2018 22:44 | 1.9 | 20.7 | 4.5 | 3.4 | 0.1544 | 2.8 |
| 4/20/2018 22:45 | 2.8 | 20.9 | 4.5 | 3.4 | 0.1661 | 2.8 |
| 4/20/2018 22:46 | 3.4 | 20.7 | 4.6 | 3.4 | 0.1684 | 2.9 |
| 4/20/2018 22:47 | 4.3 | 20.9 | 4.6 | 3.4 | 0.1577 | 2.9 |
| 4/20/2018 22:48 | 3.5 | 20.7 | 4.5 | 3.4 | 0.1736 | 2.9 |
| 4/20/2018 22:49 | 3.3 | 20.7 | 4.6 | 3.4 | 0.158  | 3   |
| 4/20/2018 22:50 | 2.4 | 20.7 | 4.5 | 3.4 | 0.1712 | 2.8 |
| 4/20/2018 22:51 | 2.4 | 20.8 | 4.5 | 3.4 | 0.1549 | 2.7 |
| 4/20/2018 22:52 | 5.4 | 20.8 | 4.6 | 3.4 | 0.1691 | 2.7 |
| 4/20/2018 22:53 | 3.3 | 20.7 | 4.6 | 3.4 | 0.1639 | 2.7 |
| 4/20/2018 22:54 | 1.5 | 20.8 | 4.8 | 3.4 | 0.1628 | 2.7 |
| 4/20/2018 22:55 | 2.9 | 20.7 | 4.8 | 3.4 | 0.1687 | 2.8 |
| 4/20/2018 22:56 | 3   | 20.8 | 4.8 | 3.4 | 0.16   | 2.9 |
| 4/20/2018 22:57 | 2.3 | 20.7 | 4.8 | 3.4 | 0.1762 | 2.9 |
| 4/20/2018 22:58 | 3.1 | 20.9 | 4.6 | 3.4 | 0.1637 | 3   |
| 4/20/2018 22:59 | 3.2 | 20.7 | 4.8 | 3.4 | 0.1761 | 2.9 |
| 4/20/2018 23:00 | 2.7 | 20.5 | 5   | 3.4 | 0.1565 | 2.9 |
| 4/20/2018 23:01 | 3.1 | 20.8 | 5.1 | 3.4 | 0.1733 | 2.8 |



|                 |     |      |     |     |        |     |
|-----------------|-----|------|-----|-----|--------|-----|
| 4/20/2018 23:02 | 3.4 | 20.8 | 4.9 | 3.4 | 0.1647 | 2.9 |
| 4/20/2018 23:03 | 4   | 20.6 | 4.8 | 3.4 | 0.1613 | 2.9 |
| 4/20/2018 23:04 | 2.8 | 20.6 | 4.8 | 3.4 | 0.175  | 3   |
| 4/20/2018 23:05 | 2.4 | 20.6 | 4.9 | 3.5 | 0.157  | 3   |
| 4/20/2018 23:06 | 3.4 | 20.7 | 4.9 | 3.4 | 0.1761 | 3   |
| 4/20/2018 23:07 | 3.7 | 20.7 | 4.8 | 3.4 | 0.1596 | 3.1 |
| 4/20/2018 23:08 | 3.3 | 20.7 | 4.8 | 3.5 | 0.1736 | 3.1 |
| 4/20/2018 23:09 | 2.2 | 20.7 | 4.8 | 3.5 | 0.1583 | 3   |
| 4/20/2018 23:10 | 3.4 | 20.7 | 4.7 | 3.5 | 0.1626 | 3   |
| 4/20/2018 23:11 | 2.3 | 20.6 | 4.8 | 3.5 | 0.1675 | 3   |
| 4/20/2018 23:12 | 4.9 | 20.7 | 4.7 | 3.5 | 0.1634 | 3   |
| 4/20/2018 23:13 | 4.4 | 20.8 | 4.8 | 3.5 | 0.1701 | 3.1 |
| 4/20/2018 23:14 | 2.9 | 20.6 | 4.8 | 3.5 | 0.1568 | 3.2 |
| 4/20/2018 23:15 | 4.5 | 20.6 | 4.9 | 3.5 | 0.1731 | 3.2 |
| 4/20/2018 23:16 | 4   | 20.6 | 5.2 | 3.4 | 0.1578 | 3.3 |
| 4/20/2018 23:17 | 2.9 | 20.4 | 5.2 | 3.4 | 0.1639 | 3.4 |
| 4/20/2018 23:18 | 3.5 | 20.5 | 4.7 | 3.4 | 0.1712 | 3.4 |
| 4/20/2018 23:19 | 3.1 | 20.7 | 4.9 | 3.4 | 0.1619 | 3.3 |
| 4/20/2018 23:20 | 4   | 20.6 | 5.1 | 3.4 | 0.1792 | 3.5 |
| 4/20/2018 23:21 | 2.4 | 20.6 | 5.3 | 3.4 | 0.1598 | 3.6 |
| 4/20/2018 23:22 | 2.4 | 20.4 | 5   | 3.4 | 0.1739 | 3.7 |
| 4/20/2018 23:23 | 3.5 | 20.4 | 5   | 3.4 | 0.1617 | 3.7 |
| 4/20/2018 23:24 | 3.2 | 20.5 | 5.2 | 3.4 | 0.1746 | 3.8 |
| 4/20/2018 23:25 | 2.6 | 20.5 | 4.9 | 3.4 | 0.1561 | 3.7 |
| 4/20/2018 23:26 | 1.9 | 20.7 | 4.9 | 3.4 | 0.1733 | 3.6 |
| 4/20/2018 23:27 | 2.8 | 20.6 | 5   | 3.4 | 0.1635 | 3.7 |
| 4/20/2018 23:28 | 3.9 | 20.5 | 4.9 | 3.4 | 0.1763 | 3.8 |
| 4/20/2018 23:29 | 3.8 | 20.5 | 4.9 | 3.5 | 0.1702 | 3.8 |
| 4/20/2018 23:30 | 4.4 | 20.6 | 4.9 | 3.4 | 0.1621 | 3.8 |
| 4/20/2018 23:31 | 4.1 | 20.4 | 4.9 | 3.5 | 0.1772 | 3.7 |
| 4/20/2018 23:32 | 3.6 | 20.6 | 4.9 | 3.5 | 0.157  | 3.8 |
| 4/20/2018 23:33 | 2.9 | 20.7 | 5   | 3.5 | 0.1763 | 3.8 |
| 4/20/2018 23:34 | 3.7 | 20.3 | 5   | 3.5 | 0.1615 | 3.8 |
| 4/20/2018 23:35 | 3.3 | 20.5 | 5.2 | 3.5 | 0.1714 | 3.8 |
| 4/20/2018 23:36 | 2.6 | 20.3 | 5.5 | 3.5 | 0.171  | 3.8 |
| 4/20/2018 23:37 | 4.2 | 20.3 | 5.2 | 3.5 | 0.1659 | 3.9 |
| 4/20/2018 23:38 | 3.5 | 20.4 | 5.2 | 3.5 | 0.1724 | 3.9 |
| 4/20/2018 23:39 | 2.7 | 20.4 | 5.4 | 3.5 | 0.1667 | 3.9 |
| 4/20/2018 23:40 | 1.6 | 20.5 | 5.4 | 3.5 | 0.1739 | 3.9 |
| 4/20/2018 23:41 | 2.6 | 20.5 | 5.8 | 3.4 | 0.1612 | 3.9 |
| 4/20/2018 23:42 | 2.9 | 20.4 | 5.5 | 3.5 | 0.1771 | 3.9 |
| 4/20/2018 23:43 | 3.9 | 20.4 | 5.5 | 3.5 | 0.1782 | 3.7 |
| 4/20/2018 23:44 | 3.3 | 20.2 | 5.9 | 3.5 | 0.1678 | 3.8 |
| 4/20/2018 23:45 | 4.3 | 20.1 | 5.7 | 3.5 | 0.1763 | 3.9 |
| 4/20/2018 23:46 | 3.8 | 20.3 | 5.7 | 3.5 | 0.1638 | 3.9 |
| 4/20/2018 23:47 | 2.7 | 20.3 | 5.8 | 3.5 | 0.1685 | 3.9 |
| 4/20/2018 23:48 | 4   | 20.3 | 5.7 | 3.5 | 0.1624 | 4   |

|                 |     |      |     |     |        |     |
|-----------------|-----|------|-----|-----|--------|-----|
| 4/20/2018 23:49 | 0.9 | 20.2 | 5.6 | 3.6 | 0.166  | 4   |
| 4/20/2018 23:50 | 3.4 | 20.2 | 5.9 | 3.6 | 0.1572 | 4   |
| 4/20/2018 23:51 | 3.4 | 20.2 | 5.8 | 3.6 | 0.1718 | 4   |
| 4/20/2018 23:52 | 2.5 | 20.2 | 5.8 | 3.6 | 0.1656 | 4   |
| 4/20/2018 23:53 | 3.8 | 20.4 | 5.7 | 3.6 | 0.1673 | 3.8 |
| 4/20/2018 23:54 | 3.7 | 20   | 6   | 3.6 | 0.1745 | 3.8 |
| 4/20/2018 23:55 | 1.7 | 20   | 6.9 | 3.6 | 0.1716 | 3.9 |
| 4/20/2018 23:56 | 3.5 | 20   | 6.1 | 3.7 | 0.1784 | 3.9 |
| 4/20/2018 23:57 | 3.4 | 20   | 6.2 | 3.7 | 0.1651 | 3.8 |
| 4/20/2018 23:58 | 3.3 | 20   | 6.4 | 3.7 | 0.1842 | 3.9 |
| 4/20/2018 23:59 | 2.1 | 20   | 6.4 | 3.7 | 0.1625 | 3.9 |
| 4/21/2018 0:00  | 2.7 | 20.2 | 7   | 3.7 | 0.1789 | 4   |
| 4/21/2018 0:01  | 3.1 | 20.1 | 7.2 | 3.7 | 0.1764 | 3.8 |
| 4/21/2018 0:02  | 1.9 | 20.2 | 6.8 | 3.7 | 0.1731 | 3.3 |
| 4/21/2018 0:03  | 3.7 | 20.1 | 6.4 | 3.7 | 0.1818 | 3.6 |
| 4/21/2018 0:04  | 4.6 | 19.9 | 6.7 | 3.6 | 0.168  | 3.6 |
| 4/21/2018 0:05  | 2.6 | 19.9 | 6.8 | 3.6 | 0.1816 | 3.5 |
| 4/21/2018 0:06  | 3   | 20.2 | 6.7 | 3.6 | 0.165  | 3.7 |
| 4/21/2018 0:07  | 4.2 | 20.2 | 6.7 | 3.7 | 0.1859 | 3.8 |
| 4/21/2018 0:08  | 3.2 | 20.1 | 6.5 | 3.7 | 0.1805 | 3.8 |
| 4/21/2018 0:09  | 3   | 20.2 | 6.5 | 3.7 | 0.179  | 3.9 |
| 4/21/2018 0:10  | 3.1 | 20.1 | 6.5 | 3.7 | 0.1837 | 3.9 |
| 4/21/2018 0:11  | 2.9 | 20.2 | 6.5 | 3.7 | 0.175  | 4   |
| 4/21/2018 0:12  | 2.2 | 20.4 | 6.2 | 3.7 | 0.1844 | 4   |
| 4/21/2018 0:13  | 4.9 | 20   | 6.6 | 3.7 | 0.1781 | 3.9 |
| 4/21/2018 0:14  | 2.4 | 19.9 | 6.8 | 3.7 | 0.1943 | 4   |
| 4/21/2018 0:15  | 2.8 | 20.2 | 6.5 | 3.7 | 0.1667 | 4.1 |
| 4/21/2018 0:16  | 3.3 | 20.1 | 6.3 | 3.7 | 0.185  | 3.8 |
| 4/21/2018 0:17  | 2.9 | 20.3 | 6.2 | 3.8 | 0.1783 | 1.9 |
| 4/21/2018 0:18  | 1.4 | 19.9 | 6.3 | 3.8 | 0.1855 | 1.8 |
| 4/21/2018 0:19  | 1.8 | 20.3 | 6.5 | 3.7 | 0.1932 | 2.2 |
| 4/21/2018 0:20  | 3.3 | 20.1 | 6.5 | 3.7 | 0.1788 | 2.3 |
| 4/21/2018 0:21  | 2.4 | 20.1 | 6.3 | 3.7 | 0.1899 | 2.3 |
| 4/21/2018 0:22  | 4.4 | 20.3 | 6.4 | 3.7 | 0.179  | 2.3 |
| 4/21/2018 0:23  | 3.8 | 20.2 | 6.3 | 3.8 | 0.1893 | 2.5 |
| 4/21/2018 0:24  | 3.3 | 20.2 | 6.2 | 3.8 | 0.1866 | 2.5 |
| 4/21/2018 0:25  | 2.3 | 20.6 | 6.2 | 3.7 | 0.1885 | 2.6 |
| 4/21/2018 0:26  | 3.2 | 20.1 | 6.2 | 3.7 | 0.187  | 2.7 |
| 4/21/2018 0:27  | 2.6 | 20.2 | 6.2 | 3.7 | 0.1976 | 2.8 |
| 4/21/2018 0:28  | 3.7 | 20.2 | 6.1 | 3.7 | 0.1897 | 2.8 |
| 4/21/2018 0:29  | 3.3 | 20.3 | 6   | 3.7 | 0.185  | 2.7 |
| 4/21/2018 0:30  | 3   | 20.1 | 6   | 3.7 | 0.1893 | 2.7 |
| 4/21/2018 0:31  | 3.1 | 20.3 | 6   | 3.7 | 0.1752 | 2.7 |
| 4/21/2018 0:32  | 3.1 | 20.5 | 6.2 | 3.7 | 0.2005 | 2.7 |
| 4/21/2018 0:33  | 2.7 | 20.6 | 6.1 | 3.7 | 0.1844 | 2.7 |
| 4/21/2018 0:34  | 2.6 | 20.5 | 6   | 3.7 | 0.1888 | 2.9 |
| 4/21/2018 0:35  | 3.2 | 20.5 | 5.9 | 3.7 | 0.1776 | 3   |

|                |     |      |     |     |        |     |
|----------------|-----|------|-----|-----|--------|-----|
| 4/21/2018 0:36 | 2.3 | 20.4 | 6   | 3.7 | 0.1903 | 3.1 |
| 4/21/2018 0:37 | 3   | 20.4 | 6   | 3.7 | 0.187  | 3.1 |
| 4/21/2018 0:38 | 2.8 | 20.4 | 5.9 | 3.7 | 0.182  | 3.1 |
| 4/21/2018 0:39 | 3.1 | 20.7 | 5.9 | 3.7 | 0.1938 | 3   |
| 4/21/2018 0:40 | 2.5 | 20.6 | 5.8 | 3.7 | 0.1834 | 3   |
| 4/21/2018 0:41 | 3.9 | 20.3 | 5.8 | 3.7 | 0.1896 | 3   |
| 4/21/2018 0:42 | 3.9 | 20.3 | 5.8 | 3.7 | 0.1847 | 3   |
| 4/21/2018 0:43 | 2.5 | 20.3 | 5.8 | 3.7 | 0.1951 | 3   |
| 4/21/2018 0:44 |     | 20.3 | 5.8 | 3.6 | 0.1889 | 2.9 |
| 4/21/2018 0:45 |     | 20.5 | 5.8 | 3.7 | 0.1914 | 3   |
| 4/21/2018 0:46 | 7.1 | 20.4 | 5.7 | 3.7 | 0.1874 | 3.1 |
| 4/21/2018 0:47 | 5.1 | 20.4 | 5.7 | 3.7 | 0.1782 | 3.1 |
| 4/21/2018 0:48 | 3.2 | 20.3 | 5.7 | 3.6 | 0.1921 | 3.1 |
| 4/21/2018 0:49 | 2.3 | 20.4 | 5.7 | 3.6 | 0.1754 | 3.1 |
| 4/21/2018 0:50 | 3.5 | 20.6 | 5.7 | 3.6 | 0.1905 | 3   |
| 4/21/2018 0:51 | 3.4 | 20.4 | 5.6 | 3.6 | 0.1797 | 3.1 |
| 4/21/2018 0:52 | 2.8 | 20.7 | 5.6 | 3.6 | 0.1903 | 3.2 |
| 4/21/2018 0:53 |     | 20.7 | 5.6 | 3.6 | 0.1774 | 3.2 |
| 4/21/2018 0:54 |     | 20.5 | 5.5 | 3.6 | 0.1795 | 3.1 |
| 4/21/2018 0:55 |     | 20.5 | 5.5 | 3.5 | 0.1781 | 3.2 |
| 4/21/2018 0:56 |     | 20.6 | 5.5 | 3.5 | 0.1799 | 3.2 |
| 4/21/2018 0:57 |     | 20.6 | 5.4 | 3.5 | 0.1939 | 3.2 |
| 4/21/2018 0:58 |     | 20.4 | 5.4 | 3.5 | 0.1758 | 3.2 |
| 4/21/2018 0:59 | 4   | 20.4 | 5.4 | 3.5 | 0.1886 | 3.2 |
| 4/21/2018 1:00 |     | 20.4 | 5.4 | 3.4 | 0.1725 | 3.3 |
| 4/21/2018 1:01 | 3.8 | 20.5 | 5.3 | 3.5 | 0.1839 | 3.3 |
| 4/21/2018 1:02 | 2.8 | 20.5 | 5.3 | 3.5 | 0.1773 | 3.3 |
| 4/21/2018 1:03 |     | 20.7 | 5.4 | 3.5 | 0.1857 | 3.3 |
| 4/21/2018 1:04 | 3.2 | 20.5 | 5.3 | 3.5 | 0.1819 | 3.3 |
| 4/21/2018 1:05 | 2.2 | 20.3 | 5.3 | 3.6 | 0.1814 | 3.3 |
| 4/21/2018 1:06 | 2.8 | 20.5 | 5.3 | 3.6 | 0.1907 | 3.3 |
| 4/21/2018 1:07 | 2.5 | 20.6 | 5.4 | 3.6 | 0.1755 | 3.4 |
| 4/21/2018 1:08 | 2.4 | 20.5 | 5.4 | 3.6 | 0.1877 | 3.4 |
| 4/21/2018 1:09 | 2.8 | 20.3 | 5.3 | 3.6 | 0.1762 | 3.4 |
| 4/21/2018 1:10 | 1.9 | 20.6 | 5.3 | 3.6 | 0.1879 | 3.5 |
| 4/21/2018 1:11 | 5   | 20.5 | 5.3 | 3.6 | 0.174  | 3.5 |
| 4/21/2018 1:12 | 2.2 | 20.5 | 5.3 | 3.6 | 0.1814 | 3.5 |
| 4/21/2018 1:13 | 2.1 | 20.3 | 5.2 | 3.6 | 0.1841 | 3.5 |
| 4/21/2018 1:14 | 2.9 | 20.3 | 5.1 | 3.5 | 0.1727 | 3.6 |
| 4/21/2018 1:15 | 3.8 | 20.3 | 5.2 | 3.5 | 0.1856 | 3.6 |
| 4/21/2018 1:16 | 2.9 | 20.1 | 5.2 | 3.5 | 0.1733 | 3.6 |
| 4/21/2018 1:17 | 3.7 | 20.5 | 5.2 | 3.5 | 0.1815 | 3.6 |
| 4/21/2018 1:18 | 2.1 | 20   | 5.2 | 3.5 | 0.174  | 3.7 |
| 4/21/2018 1:19 | 3   | 20.4 | 5.2 | 3.5 | 0.1867 | 3.2 |
| 4/21/2018 1:20 | 3.9 | 20.5 | 5.1 | 3.5 | 0.1824 | 2.4 |
| 4/21/2018 1:21 | 4.4 | 20.5 | 5.1 | 3.6 | 0.183  | 2.6 |
| 4/21/2018 1:22 | 2.5 | 20.2 | 5.3 | 3.5 | 0.1772 | 2.7 |

|                |     |      |     |     |        |     |
|----------------|-----|------|-----|-----|--------|-----|
| 4/21/2018 1:23 | 2.3 | 20.4 | 5.2 | 3.5 | 0.1755 | 2.8 |
| 4/21/2018 1:24 | 2.2 | 20.4 | 5.2 | 3.5 | 0.1826 | 2.7 |
| 4/21/2018 1:25 | 2.4 | 20.4 | 5.3 | 3.5 | 0.1683 | 2.4 |
| 4/21/2018 1:26 | 3.5 | 20.2 | 5.3 | 3.6 | 0.1868 | 2.2 |
| 4/21/2018 1:27 | 2   | 20.2 | 5.3 | 3.6 | 0.1733 | 2.3 |
| 4/21/2018 1:28 | 2.7 | 20   | 5.4 | 3.5 | 0.1926 | 2.3 |
| 4/21/2018 1:29 | 2.9 | 20.4 | 5.5 | 3.5 | 0.1811 | 2.4 |
| 4/21/2018 1:30 | 2   | 20.1 | 5.3 | 3.5 | 0.1808 | 2.4 |
| 4/21/2018 1:31 | 2.1 | 20.1 | 5.4 | 3.5 | 0.182  | 2.4 |
| 4/21/2018 1:32 | 2.4 | 20.5 | 5.3 | 3.5 | 0.1758 | 2.6 |
| 4/21/2018 1:33 | 2.6 | 20.2 | 5.3 | 3.6 | 0.1885 | 2.7 |
| 4/21/2018 1:34 | 3.5 | 20.2 | 5.5 | 3.6 | 0.1748 | 2.7 |
| 4/21/2018 1:35 | 2.9 | 20.3 | 5.4 | 3.6 | 0.186  | 2.8 |
| 4/21/2018 1:36 | 3.5 | 19.8 | 5.5 | 3.6 | 0.1704 | 3   |
| 4/21/2018 1:37 | 3.4 | 20.1 | 5.6 | 3.6 | 0.1845 | 3   |
| 4/21/2018 1:38 | 2.6 | 20.1 | 5.8 | 3.6 | 0.1724 | 3   |
| 4/21/2018 1:39 | 3.7 | 19.7 | 5.8 | 3.6 | 0.1794 | 3.1 |
| 4/21/2018 1:40 | 2.6 | 20.1 | 6.1 | 3.6 | 0.1794 | 3   |
| 4/21/2018 1:41 | 3.3 | 19.9 | 5.6 | 3.6 | 0.1775 | 2.5 |
| 4/21/2018 1:42 | 3.3 | 20.2 | 6.1 | 3.6 | 0.1892 | 2   |
| 4/21/2018 1:43 | 2.9 | 20   | 6   | 3.6 | 0.1748 | 2.2 |
| 4/21/2018 1:44 | 1.4 | 20.1 | 6.2 | 3.6 | 0.1903 | 2.4 |
| 4/21/2018 1:45 | 1.9 | 20.2 | 6   | 3.6 | 0.1707 | 2.4 |
| 4/21/2018 1:46 | 1.4 | 20   | 6   | 3.7 | 0.1766 | 2.5 |
| 4/21/2018 1:47 | 1.5 | 20.1 | 6.4 | 3.7 | 0.1789 | 2.6 |
| 4/21/2018 1:48 | 2.8 | 19.8 | 6.4 | 3.7 | 0.1762 | 2.7 |
| 4/21/2018 1:49 | 2.8 | 20   | 6.5 | 3.7 | 0.1817 | 2.7 |
| 4/21/2018 1:50 | 3.3 | 20.2 | 6.1 | 3.7 | 0.1772 | 2.9 |
| 4/21/2018 1:51 | 2.5 | 19.8 | 6   | 3.7 | 0.1883 | 2.9 |
| 4/21/2018 1:52 | 3.7 | 20   | 6.2 | 3.8 | 0.1734 | 3   |
| 4/21/2018 1:53 | 3.6 | 19.9 | 6.1 | 3.8 | 0.1829 | 3   |
| 4/21/2018 1:54 | 2.8 | 19.8 | 6.7 | 3.8 | 0.1741 | 3   |
| 4/21/2018 1:55 | 2.8 | 19.8 | 6.8 | 3.8 | 0.1846 | 3   |
| 4/21/2018 1:56 | 2.8 | 19.9 | 6.1 | 3.8 | 0.1731 | 3.1 |
| 4/21/2018 1:57 | 2.1 | 20.1 | 6.5 | 3.9 | 0.1755 | 3   |
| 4/21/2018 1:58 | 4.2 | 20   | 6.1 | 3.9 | 0.1863 | 2.9 |
| 4/21/2018 1:59 | 2.8 | 19.9 | 5.9 | 3.8 | 0.1705 | 3   |
| 4/21/2018 2:00 | 2.1 | 20   | 6.4 | 3.8 | 0.1824 | 3   |
| 4/21/2018 2:01 | 1.9 | 19.8 | 6.7 | 3.8 | 0.1752 | 3   |
| 4/21/2018 2:02 | 2.9 | 19.8 | 6.8 | 3.8 | 0.1842 | 3   |
| 4/21/2018 2:03 | 2.4 | 20.2 | 6.8 | 3.7 | 0.1714 | 3   |
| 4/21/2018 2:04 | 3.1 | 19.8 | 6.4 | 3.8 | 0.1804 | 3.1 |
| 4/21/2018 2:05 | 2.9 | 20   | 6.3 | 3.8 | 0.1833 | 3.1 |
| 4/21/2018 2:06 | 2.6 | 19.7 | 6.6 | 3.8 | 0.1739 | 3.2 |
| 4/21/2018 2:07 | 4.3 | 19.9 | 6.4 | 3.8 | 0.1897 | 3.1 |
| 4/21/2018 2:08 | 3.4 | 20.1 | 6.4 | 3.8 | 0.1793 | 3.2 |
| 4/21/2018 2:09 | 3.1 | 19.8 | 6.4 | 3.8 | 0.1886 | 3.2 |

|                |     |      |     |     |        |     |
|----------------|-----|------|-----|-----|--------|-----|
| 4/21/2018 2:10 | 2.3 | 19.9 | 6.4 | 3.8 | 0.174  | 3.2 |
| 4/21/2018 2:11 | 4.2 | 19.9 | 6.9 | 3.8 | 0.1927 | 2.9 |
| 4/21/2018 2:12 | 2.2 | 20   | 7   | 3.8 | 0.17   | 3   |
| 4/21/2018 2:13 | 3.3 | 20.2 | 6.9 | 3.8 | 0.1836 | 3.1 |
| 4/21/2018 2:14 | 2.1 | 19.9 | 6.2 | 3.8 | 0.1744 | 3   |
| 4/21/2018 2:15 | 2.8 | 20   | 6.2 | 3.8 | 0.184  | 3.1 |
| 4/21/2018 2:16 | 1.8 | 20.1 | 6.3 | 3.7 | 0.1816 | 3.2 |
| 4/21/2018 2:17 | 3.2 | 20   | 6.5 | 3.7 | 0.1747 | 3.4 |
| 4/21/2018 2:18 | 2.2 | 19.8 | 6.4 | 3.7 | 0.1935 | 3.4 |
| 4/21/2018 2:19 | 2.6 | 20   | 6.3 | 3.7 | 0.1711 | 3.5 |
| 4/21/2018 2:20 | 1.8 | 19.9 | 6.3 | 3.7 | 0.184  | 3.6 |
| 4/21/2018 2:21 | 1.5 | 20.1 | 6.2 | 3.7 | 0.1741 | 3.6 |
| 4/21/2018 2:22 | 1.9 | 20.1 | 6.2 | 3.7 | 0.1901 | 3.6 |
| 4/21/2018 2:23 | 2.3 | 20.1 | 6.2 | 3.7 | 0.1728 | 3.5 |
| 4/21/2018 2:24 | 3.6 | 20   | 6.2 | 3.7 | 0.1857 | 3.5 |
| 4/21/2018 2:25 | 2.8 | 20   | 6.3 | 3.7 | 0.1732 | 3.5 |
| 4/21/2018 2:26 | 5.2 | 19.9 | 6.3 | 3.7 | 0.1701 | 3.5 |
| 4/21/2018 2:27 | 3.9 | 20.1 | 6   | 3.7 | 0.1866 | 3.5 |
| 4/21/2018 2:28 | 2.6 | 20   | 6.1 | 3.6 | 0.17   | 3.5 |
| 4/21/2018 2:29 | 2.7 | 20.2 | 6   | 3.7 | 0.1886 | 3.5 |
| 4/21/2018 2:30 | 2.3 | 20   | 6   | 3.6 | 0.1708 | 3.6 |
| 4/21/2018 2:31 | 2.5 | 20.3 | 5.9 | 3.6 | 0.189  | 3.5 |
| 4/21/2018 2:32 | 3.3 | 20.2 | 5.9 | 3.7 | 0.1713 | 3.6 |
| 4/21/2018 2:33 | 2.3 | 20.1 | 6   | 3.7 | 0.1811 | 3.6 |
| 4/21/2018 2:34 | 1.5 | 20   | 6.2 | 3.7 | 0.179  | 3.7 |
| 4/21/2018 2:35 | 1.3 | 19.9 | 6.2 | 3.7 | 0.1765 | 3.6 |
| 4/21/2018 2:36 | 2.7 | 19.8 | 6   | 3.8 | 0.1766 | 3.1 |
| 4/21/2018 2:37 | 2.6 | 19.9 | 6.1 | 3.8 | 0.1744 | 3   |
| 4/21/2018 2:38 | 3.1 | 19.9 | 6   | 3.8 | 0.1841 | 3.1 |
| 4/21/2018 2:39 | 2.4 | 20   | 6.2 | 3.8 | 0.1677 | 3.3 |
| 4/21/2018 2:40 | 2.1 | 19.7 | 6.3 | 3.8 | 0.1876 | 3.5 |
| 4/21/2018 2:41 | 3   | 19.9 | 6   | 3.8 | 0.1689 | 3.6 |
| 4/21/2018 2:42 | 3.5 | 20   | 6.1 | 3.8 | 0.1778 | 3.6 |
| 4/21/2018 2:43 | 1.8 | 19.9 | 6.3 | 3.8 | 0.179  | 3.6 |
| 4/21/2018 2:44 | 1.6 | 19.7 | 7   | 3.8 | 0.1785 | 3.5 |
| 4/21/2018 2:45 | 1.8 | 20.1 | 6.6 | 3.8 | 0.1825 | 3.5 |
| 4/21/2018 2:46 | 2.4 | 19.9 | 6.3 | 3.8 | 0.1764 | 3.6 |
| 4/21/2018 2:47 | 3.8 | 19.9 | 6.3 | 3.8 | 0.1824 | 3.6 |
| 4/21/2018 2:48 | 3.8 | 19.7 | 6.5 | 3.9 | 0.1763 | 3.6 |
| 4/21/2018 2:49 | 1.9 | 19.9 | 6.7 | 3.9 | 0.1762 | 3.7 |
| 4/21/2018 2:50 | 3   | 20   | 6.9 | 3.9 | 0.1762 | 3.8 |
| 4/21/2018 2:51 | 1.9 | 19.7 | 7   | 3.9 | 0.1742 | 3.8 |
| 4/21/2018 2:52 | 1.1 | 19.6 | 6.8 | 3.9 | 0.181  | 3.8 |
| 4/21/2018 2:53 | 1.7 | 19.5 | 7.1 | 3.9 | 0.1708 | 3.8 |
| 4/21/2018 2:54 | 4.1 | 19.7 | 6.9 | 3.9 | 0.1849 | 3.8 |
| 4/21/2018 2:55 | 2.7 | 19.6 | 6.9 | 3.9 | 0.1637 | 3.8 |
| 4/21/2018 2:56 | 3.6 | 19.7 | 6.6 | 3.9 | 0.1891 | 3.8 |

|                |     |      |     |     |        |     |
|----------------|-----|------|-----|-----|--------|-----|
| 4/21/2018 2:57 | 1.7 | 20   | 6.7 | 3.9 | 0.172  | 3.9 |
| 4/21/2018 2:58 | 2.6 | 19.8 | 7.1 | 3.9 | 0.1792 | 3.8 |
| 4/21/2018 2:59 | 3.1 | 19.6 | 6.9 | 3.9 | 0.1787 | 3.9 |
| 4/21/2018 3:00 | 1.8 | 19.6 | 6.7 | 3.9 | 0.1724 | 3.8 |
| 4/21/2018 3:01 | 1.7 | 19.8 | 6.6 | 3.9 | 0.1803 | 3.8 |
| 4/21/2018 3:02 | 1.8 | 19.5 | 6.7 | 3.9 | 0.1655 | 3.8 |
| 4/21/2018 3:03 | 3.9 | 19.7 | 6.6 | 3.9 | 0.1833 | 3.8 |
| 4/21/2018 3:04 | 2.4 | 19.7 | 6.5 | 3.9 | 0.1715 | 3.6 |
| 4/21/2018 3:05 | 2.8 | 19.8 | 6.8 | 3.9 | 0.1854 | 3   |
| 4/21/2018 3:06 | 4   | 20.1 | 6.9 | 3.9 | 0.1778 | 2.3 |
| 4/21/2018 3:07 | 1.5 | 19.7 | 6.8 | 3.9 | 0.1743 | 2.1 |
| 4/21/2018 3:08 | 2.5 | 19.7 | 7   | 3.9 | 0.1776 | 2.1 |
| 4/21/2018 3:09 | 2.3 | 19.9 | 6.9 | 3.9 | 0.1709 | 2.1 |
| 4/21/2018 3:10 | 2.8 | 19.8 | 6.8 | 4   | 0.1877 | 2   |
| 4/21/2018 3:11 | 3.6 | 19.7 | 6.7 | 4   | 0.1689 | 1.8 |
| 4/21/2018 3:12 | 3.8 | 20.1 | 6.6 | 4   | 0.1858 | 1.8 |
| 4/21/2018 3:13 | 3.2 | 19.7 | 6.6 | 4   | 0.1658 | 1.9 |
| 4/21/2018 3:14 | 2.9 | 19.9 | 6.7 | 4   | 0.1812 | 1.6 |
| 4/21/2018 3:15 | 1.9 | 19.8 | 6.6 | 4   | 0.1827 | 1.6 |
| 4/21/2018 3:16 | 3.7 | 19.6 | 6.6 | 4   | 0.1741 | 1.5 |
| 4/21/2018 3:17 | 2.8 | 19.8 | 6.5 | 4   | 0.1837 | 1.6 |
| 4/21/2018 3:18 | 2.7 | 19.9 | 6.4 | 4   | 0.1716 | 1.6 |
| 4/21/2018 3:19 | 1.8 | 19.8 | 6.5 | 4   | 0.1829 | 1.6 |
| 4/21/2018 3:20 | 3.3 | 20   | 6.5 | 4   | 0.1704 | 1.6 |
| 4/21/2018 3:21 | 2.8 | 19.8 | 6.4 | 4   | 0.1797 | 1.6 |
| 4/21/2018 3:22 | 4.5 | 19.7 | 6.6 | 4   | 0.1771 | 1.6 |
| 4/21/2018 3:23 | 3   | 19.8 | 6.6 | 4   | 0.1711 | 1.6 |
| 4/21/2018 3:24 | 3.7 | 19.9 | 6.4 | 4   | 0.1797 | 1.5 |
| 4/21/2018 3:25 | 2.5 | 20   | 6.4 | 3.9 | 0.168  | 1.5 |
| 4/21/2018 3:26 | 1.9 | 19.9 | 6.3 | 3.9 | 0.1867 | 1.5 |
| 4/21/2018 3:27 | 2.3 | 20   | 6.3 | 3.9 | 0.1709 | 1.5 |
| 4/21/2018 3:28 | 3.7 | 20.1 | 6.4 | 3.9 | 0.1881 | 1.5 |
| 4/21/2018 3:29 | 2.3 | 19.7 | 6.7 | 3.9 | 0.1712 | 1.6 |
| 4/21/2018 3:30 | 2.4 | 20   | 6.6 | 3.9 | 0.1799 | 1.6 |
| 4/21/2018 3:31 | 1   | 20   | 6.4 | 3.9 | 0.1701 | 1.5 |
| 4/21/2018 3:32 | 2.2 | 20   | 6.5 | 3.9 | 0.1765 | 1.5 |
| 4/21/2018 3:33 | 2.4 | 20   | 6.4 | 3.9 | 0.1769 | 1.5 |
| 4/21/2018 3:34 |     | 19.9 | 6.4 | 3.9 | 0.1676 | 1.5 |
| 4/21/2018 3:35 | 3.3 | 19.9 | 6.5 | 3.9 | 0.1824 | 1.5 |
| 4/21/2018 3:36 | 2.6 | 19.9 | 6.3 | 3.9 | 0.1605 | 1.5 |
| 4/21/2018 3:37 | 1.9 | 19.7 | 6.4 | 4   | 0.183  | 1.6 |
| 4/21/2018 3:38 | 3.3 | 19.8 | 6.7 | 4   | 0.1657 | 1.5 |
| 4/21/2018 3:39 | 2.3 | 19.6 | 6.9 | 3.9 | 0.177  | 1.5 |
| 4/21/2018 3:40 | 1.9 | 19.7 | 6.5 | 4   | 0.1767 | 1.5 |
| 4/21/2018 3:41 | 1.5 | 19.6 | 6.7 | 4   | 0.1651 | 1.5 |
| 4/21/2018 3:42 | 1.5 | 19.6 | 6.7 | 4   | 0.1836 | 1.5 |
| 4/21/2018 3:43 | 3.4 | 19.8 | 6.5 | 4   | 0.1728 | 1.5 |

|                |     |      |     |     |        |     |
|----------------|-----|------|-----|-----|--------|-----|
| 4/21/2018 3:44 |     | 19.5 | 6.8 | 4   | 0.1791 | 1.5 |
| 4/21/2018 3:45 | 0.9 | 19.6 | 7.1 | 3.9 | 0.1648 | 1.6 |
| 4/21/2018 3:46 |     | 19.7 | 7.3 | 3.9 | 0.1806 | 1.5 |
| 4/21/2018 3:47 | 2.8 | 19.6 | 6.9 | 3.9 | 0.1652 | 1.5 |
| 4/21/2018 3:48 |     | 19.6 | 6.7 | 3.9 | 0.1716 | 1.6 |
| 4/21/2018 3:49 | 2.3 | 19.6 | 6.8 | 3.9 | 0.175  | 1.5 |
| 4/21/2018 3:50 | 3.6 | 19.6 | 6.6 | 3.9 | 0.1649 | 1.5 |
| 4/21/2018 3:51 |     | 20.1 | 6.8 | 4   | 0.1778 | 1.6 |
| 4/21/2018 3:52 | 1.9 | 20   | 6.6 | 4   | 0.1673 | 1.5 |
| 4/21/2018 3:53 |     | 19.6 | 6.6 | 4   | 0.1757 | 1.5 |
| 4/21/2018 3:54 |     | 19.5 | 6.6 | 4   | 0.1668 | 1.5 |
| 4/21/2018 3:55 |     | 19.8 | 6.9 | 4   | 0.1791 | 1.5 |
| 4/21/2018 3:56 | 2.7 | 19.7 | 6.8 | 4.1 | 0.1678 | 1.5 |
| 4/21/2018 3:57 | 3.5 | 19.7 | 7.1 | 4   | 0.1745 | 1.5 |
| 4/21/2018 3:58 | 2.4 | 19.7 | 7   | 4   | 0.1731 | 1.5 |
| 4/21/2018 3:59 | 3   | 19.7 | 6.8 | 4   | 0.1747 | 1.6 |
| 4/21/2018 4:00 | 2.7 | 19.4 | 7.3 | 4   | 0.1792 | 1.6 |
| 4/21/2018 4:01 | 1.7 | 19.6 | 7.1 | 4   | 0.167  | 1.6 |
| 4/21/2018 4:02 | 2.5 | 19.5 | 7.2 | 4   | 0.1814 | 1.6 |
| 4/21/2018 4:03 | 3.3 | 19.8 | 7.5 | 3.9 | 0.1668 | 1.6 |
| 4/21/2018 4:04 | 3.2 | 19.8 | 7.7 | 3.9 | 0.1769 | 1.6 |
| 4/21/2018 4:05 | 2.5 | 19.6 | 7.7 | 3.9 | 0.1718 | 1.6 |
| 4/21/2018 4:06 | 2.2 | 19.6 | 7.3 | 3.9 | 0.1687 | 1.5 |
| 4/21/2018 4:07 | 2.5 | 19.7 | 6.9 | 3.9 | 0.178  | 1.6 |
| 4/21/2018 4:08 | 1.7 | 19.6 | 7.1 | 3.9 | 0.164  | 1.6 |
| 4/21/2018 4:09 | 2.1 | 19.9 | 7   | 3.9 | 0.1818 | 1.6 |
| 4/21/2018 4:10 | 2.6 | 20   | 7   | 3.9 | 0.1597 | 1.6 |
| 4/21/2018 4:11 | 2.9 | 20   | 7   | 4   | 0.1797 | 1.6 |
| 4/21/2018 4:12 | 3.3 | 19.7 | 7.1 | 4   | 0.1664 | 1.6 |
| 4/21/2018 4:13 | 4.3 | 19.5 | 7.2 | 4   | 0.1696 | 1.6 |
| 4/21/2018 4:14 | 1.3 | 19.5 | 7.1 | 4   | 0.179  | 1.6 |
| 4/21/2018 4:15 | 3.9 | 19.5 | 7.1 | 4   | 0.163  | 1.6 |
| 4/21/2018 4:16 | 3.2 | 19.6 | 7.2 | 4   | 0.1826 | 1.6 |
| 4/21/2018 4:17 | 2.9 | 19.7 | 7.1 | 4   | 0.1636 | 1.6 |
| 4/21/2018 4:18 | 3.1 | 19.6 | 6.8 | 4   | 0.1781 | 1.6 |
| 4/21/2018 4:19 | 3.3 | 19.6 | 7   | 4   | 0.1635 | 1.6 |
| 4/21/2018 4:20 | 2.7 | 19.7 | 6.9 | 4   | 0.1761 | 1.6 |
| 4/21/2018 4:21 | 3.1 | 19.9 | 6.9 | 4   | 0.1674 | 1.6 |
| 4/21/2018 4:22 | 2.2 | 19.7 | 7.3 | 4   | 0.1677 | 1.6 |
| 4/21/2018 4:23 | 3.4 | 19.5 | 7   | 4   | 0.177  | 1.6 |
| 4/21/2018 4:24 | 2.4 | 19.7 | 6.8 | 4.1 | 0.1643 | 1.6 |
| 4/21/2018 4:25 | 2   | 19.7 | 7.1 | 4   | 0.1779 | 1.6 |
| 4/21/2018 4:26 | 2.2 | 19.5 | 7   | 4   | 0.1681 | 1.6 |
| 4/21/2018 4:27 | 2   | 19.3 | 7.4 | 4   | 0.177  | 1.6 |
| 4/21/2018 4:28 | 3.1 | 19.3 | 7.5 | 4   | 0.1669 | 1.6 |
| 4/21/2018 4:29 | 3.7 | 19.8 | 7.3 | 4   | 0.1673 | 1.6 |
| 4/21/2018 4:30 | 2.4 | 19.9 | 7.2 | 3.9 | 0.1708 | 1.6 |

|                |     |      |     |     |        |     |
|----------------|-----|------|-----|-----|--------|-----|
| 4/21/2018 4:31 | 3.4 | 19.8 | 6.7 | 4   | 0.1583 | 1.6 |
| 4/21/2018 4:32 | 2.7 | 19.7 | 6.8 | 4   | 0.1741 | 1.7 |
| 4/21/2018 4:33 | 2.9 | 19.8 | 6.8 | 4   | 0.1659 | 1.7 |
| 4/21/2018 4:34 | 3.5 | 19.8 | 6.6 | 4   | 0.1732 | 1.7 |
| 4/21/2018 4:35 | 2.7 | 19.9 | 6.5 | 4   | 0.1731 | 1.7 |
| 4/21/2018 4:36 | 2   | 19.8 | 6.7 | 4   | 0.1695 | 1.7 |
| 4/21/2018 4:37 | 2.3 | 19.5 | 6.5 | 4.1 | 0.1757 | 1.7 |
| 4/21/2018 4:38 | 1.9 | 19.9 | 6.5 | 4.1 | 0.1657 | 1.7 |
| 4/21/2018 4:39 | 3.3 | 19.6 | 6.7 | 4.1 | 0.1775 | 1.7 |
| 4/21/2018 4:40 | 3.3 | 19.6 | 6.7 | 4.1 | 0.1568 | 1.7 |
| 4/21/2018 4:41 | 2.2 | 19.8 | 6.7 | 4.1 | 0.1693 | 1.6 |
| 4/21/2018 4:42 | 2.4 | 19.8 | 6.8 | 4.1 | 0.1735 | 1.7 |
| 4/21/2018 4:43 | 3.8 | 19.5 | 6.5 | 4.1 | 0.1651 | 1.7 |
| 4/21/2018 4:44 | 2.6 | 19.5 | 6.5 | 4.1 | 0.1774 | 1.7 |
| 4/21/2018 4:45 | 2.9 | 19.7 | 6.6 | 4.1 | 0.161  | 1.7 |
| 4/21/2018 4:46 | 0.9 | 19.3 | 6.8 | 4   | 0.1763 | 1.7 |
| 4/21/2018 4:47 | 1.9 | 19.7 | 6.5 | 4   | 0.1627 | 1.7 |
| 4/21/2018 4:48 | 3.4 | 19.6 | 6.5 | 4.1 | 0.1683 | 1.7 |
| 4/21/2018 4:49 | 2.9 | 19.6 | 6.6 | 4   | 0.1695 | 1.7 |
| 4/21/2018 4:50 | 3.5 | 19.7 | 6.3 | 4.1 | 0.1675 | 1.7 |
| 4/21/2018 4:51 | 2   | 19.8 | 6.4 | 4.1 | 0.1694 | 1.7 |
| 4/21/2018 4:52 | 2.5 | 19.9 | 6.3 | 4.1 | 0.1608 | 1.7 |
| 4/21/2018 4:53 | 2.8 | 20.1 | 6.3 | 4.1 | 0.175  | 1.7 |
| 4/21/2018 4:54 | 2.2 | 19.9 | 6.2 | 4.1 | 0.1599 | 1.8 |
| 4/21/2018 4:55 | 3.1 | 19.8 | 6.5 | 4.1 | 0.1751 | 1.8 |
| 4/21/2018 4:56 | 2.1 | 19.9 | 6.3 | 4.1 | 0.1691 | 1.7 |
| 4/21/2018 4:57 | 3.5 | 19.8 | 6.3 | 4.1 | 0.1681 | 1.7 |
| 4/21/2018 4:58 | 3.1 | 20   | 6.4 | 4.1 | 0.171  | 1.7 |
| 4/21/2018 4:59 | 1.9 | 19.7 | 6.3 | 4.1 | 0.1646 | 1.7 |
| 4/21/2018 5:00 | 2.3 | 19.7 | 6.3 | 4.1 | 0.1661 | 1.7 |
| 4/21/2018 5:01 | 3.4 | 19.7 | 6.6 | 4   | 0.1584 | 1.7 |
| 4/21/2018 5:02 | 2.7 | 19.6 | 6.7 | 4   | 0.1726 | 1.7 |
| 4/21/2018 5:03 | 2.6 | 19.5 | 6.4 | 4   | 0.1624 | 1.7 |
| 4/21/2018 5:04 | 2.1 | 19.6 | 6.7 | 4   | 0.1683 | 1.7 |
| 4/21/2018 5:05 | 3.4 | 19.7 | 6.5 | 3.9 | 0.165  | 1.7 |
| 4/21/2018 5:06 | 2.9 | 19.6 | 6.4 | 3.9 | 0.167  | 1.7 |
| 4/21/2018 5:07 | 4.2 | 19.6 | 6.3 | 3.9 | 0.1747 | 1.7 |
| 4/21/2018 5:08 | 3.4 | 19.5 | 6.3 | 3.9 | 0.1673 | 1.7 |
| 4/21/2018 5:09 | 5   | 19.9 | 6.2 | 4   | 0.1717 | 1.7 |
| 4/21/2018 5:10 | 2.1 | 19.9 | 6.1 | 4   | 0.1632 | 1.7 |
| 4/21/2018 5:11 | 2.6 | 19.6 | 6.2 | 4   | 0.1682 | 1.7 |
| 4/21/2018 5:12 | 3.1 | 19.8 | 6.3 | 4.1 | 0.1698 | 1.7 |
| 4/21/2018 5:13 | 3   | 19.9 | 6.1 | 4.1 | 0.1636 | 1.8 |
| 4/21/2018 5:14 | 2.5 | 19.8 | 6.3 | 4.1 | 0.1773 | 1.7 |
| 4/21/2018 5:15 | 2.5 | 19.7 | 6.4 | 4.1 | 0.1594 | 1.7 |
| 4/21/2018 5:16 | 2.8 | 19.7 | 6.4 | 4.1 | 0.175  | 1.7 |
| 4/21/2018 5:17 | 2.4 | 19.6 | 6.4 | 4.1 | 0.1583 | 1.8 |



|                |     |      |     |     |        |     |
|----------------|-----|------|-----|-----|--------|-----|
| 4/21/2018 5:18 | 2.5 | 19.7 | 6.3 | 4.1 | 0.1763 | 1.8 |
| 4/21/2018 5:19 | 3   | 19.5 | 6.4 | 4.1 | 0.1642 | 1.8 |
| 4/21/2018 5:20 | 2.6 | 19.6 | 6.4 | 4.1 | 0.1705 | 1.8 |
| 4/21/2018 5:21 | 3.3 | 19.4 | 6.6 | 4   | 0.1653 | 1.8 |
| 4/21/2018 5:22 | 2.5 | 19.7 | 6.8 | 4   | 0.1644 | 1.8 |
| 4/21/2018 5:23 | 1.9 | 19.8 | 6.6 | 4   | 0.175  | 1.8 |
| 4/21/2018 5:24 | 2.8 | 19.7 | 6.8 | 4   | 0.1659 | 1.8 |
| 4/21/2018 5:25 | 3   | 19.6 | 6.7 | 4   | 0.1759 | 1.8 |
| 4/21/2018 5:26 | 4.1 | 19.7 | 6.2 | 4   | 0.1691 | 1.8 |
| 4/21/2018 5:27 | 2.9 | 19.7 | 6.2 | 4   | 0.1762 | 1.8 |
| 4/21/2018 5:28 | 3.5 | 19.8 | 6.2 | 4   | 0.1698 | 1.8 |
| 4/21/2018 5:29 | 3.6 | 19.7 | 6.3 | 4   | 0.1685 | 1.8 |
| 4/21/2018 5:30 | 4   | 19.3 | 6.4 | 4.1 | 0.1725 | 1.8 |
| 4/21/2018 5:31 | 2.3 | 19.8 | 6.2 | 4.1 | 0.1548 | 1.8 |
| 4/21/2018 5:32 | 3.3 | 19.8 | 6.1 | 4.1 | 0.1791 | 1.9 |
| 4/21/2018 5:33 | 3.6 | 19.9 | 6.1 | 4.2 | 0.1606 | 1.9 |
| 4/21/2018 5:34 | 2.4 | 19.6 | 6   | 4.2 | 0.171  | 1.8 |
| 4/21/2018 5:35 | 2.1 | 19.7 | 6.2 | 4.2 | 0.167  | 1.8 |
| 4/21/2018 5:36 | 2.7 | 19.6 | 6.2 | 4.2 | 0.1698 | 1.9 |
| 4/21/2018 5:37 | 4.1 | 19.9 | 6.3 | 4.2 | 0.1724 | 1.9 |
| 4/21/2018 5:38 | 3.3 | 19.6 | 6.3 | 4.2 | 0.1607 | 2   |
| 4/21/2018 5:39 | 3.3 | 19.7 | 6.1 | 4.2 | 0.176  | 2   |
| 4/21/2018 5:40 | 2.1 | 19.7 | 6.1 | 4.2 | 0.1634 | 2   |
| 4/21/2018 5:41 | 1.9 | 19.8 | 6   | 4.2 | 0.1698 | 2   |
| 4/21/2018 5:42 | 1.6 | 19.6 | 6   | 4.2 | 0.1745 | 2   |
| 4/21/2018 5:43 | 3.5 | 19.8 | 6   | 4.2 | 0.1693 | 2   |
| 4/21/2018 5:44 | 3.1 | 19.9 | 6   | 4.2 | 0.1693 | 2   |
| 4/21/2018 5:45 | 2   | 19.8 | 6.2 | 4.2 | 0.1712 | 2.1 |
| 4/21/2018 5:46 | 2.9 | 19.8 | 6   | 4.2 | 0.1766 | 2.2 |
| 4/21/2018 5:47 | 2.9 | 19.6 | 6.1 | 4.2 | 0.1581 | 2.1 |
| 4/21/2018 5:48 | 2.1 | 19.7 | 6.3 | 4.2 | 0.1696 | 2   |
| 4/21/2018 5:49 | 3.3 | 19.6 | 6.3 | 4.2 | 0.1658 | 2.1 |
| 4/21/2018 5:50 | 3.3 | 19.6 | 6.4 | 4.2 | 0.1665 | 2.2 |
| 4/21/2018 5:51 | 3.3 | 19.6 | 6.4 | 4.2 | 0.1761 | 2.2 |
| 4/21/2018 5:52 | 2   | 19.7 | 6.7 | 4.2 | 0.1607 | 2.1 |
| 4/21/2018 5:53 | 2.4 | 19.8 | 6.6 | 4.1 | 0.1741 | 2.2 |
| 4/21/2018 5:54 | 3.3 | 19.8 | 6.8 | 4.1 | 0.163  | 2.3 |
| 4/21/2018 5:55 | 2.3 | 19.8 | 6.4 | 4.1 | 0.1727 | 2.4 |
| 4/21/2018 5:56 | 2.9 | 19.5 | 6.2 | 4.1 | 0.1576 | 2.5 |
| 4/21/2018 5:57 | 3.3 | 19.7 | 6.1 | 4.1 | 0.1711 | 2.5 |
| 4/21/2018 5:58 | 3.2 | 19.8 | 6.1 | 4.2 | 0.1591 | 2.5 |
| 4/21/2018 5:59 | 2.9 | 19.6 | 6.3 | 4.2 | 0.1718 | 2.6 |
| 4/21/2018 6:00 | 2.3 | 19.7 | 6.1 | 4.2 | 0.1757 | 2.7 |
| 4/21/2018 6:01 | 3.3 | 19.3 | 6.8 | 4.3 | 0.1619 | 2.8 |
| 4/21/2018 6:02 | 2.5 | 19.5 | 6.8 | 4.3 | 0.1712 | 2.9 |
| 4/21/2018 6:03 | 1.4 | 19.5 | 6.5 | 4.3 | 0.1627 | 2.9 |
| 4/21/2018 6:04 | 2.9 | 19.4 | 6.4 | 4.3 | 0.1741 | 2.7 |

|                |     |      |     |     |        |     |
|----------------|-----|------|-----|-----|--------|-----|
| 4/21/2018 6:05 | 2.8 | 19.9 | 6.1 | 4.3 | 0.1616 | 2.6 |
| 4/21/2018 6:06 | 1.5 | 19.5 | 6.1 | 4.3 | 0.1705 | 2.6 |
| 4/21/2018 6:07 | 2.6 | 19.6 | 6.3 | 4.3 | 0.1711 | 2.6 |
| 4/21/2018 6:08 | 0.9 | 19.4 | 6.1 | 4.3 | 0.1565 | 2.7 |
| 4/21/2018 6:09 | 2.8 | 19.8 | 6.3 | 4.3 | 0.1733 | 2.7 |
| 4/21/2018 6:10 | 3.2 | 19.8 | 6.3 | 4.4 | 0.159  | 2.7 |
| 4/21/2018 6:11 | 2.8 | 19.5 | 6.3 | 4.4 | 0.1768 | 2.7 |
| 4/21/2018 6:12 | 1   | 19.6 | 6.2 | 4.4 | 0.1664 | 2.7 |
| 4/21/2018 6:13 | 3.9 | 19.7 | 6.3 | 4.4 | 0.1692 | 2.7 |
| 4/21/2018 6:14 | 2.8 | 19.8 | 6.1 | 4.4 | 0.1657 | 2.6 |
| 4/21/2018 6:15 | 2.1 | 19.7 | 6.1 | 4.4 | 0.1642 | 2.6 |
| 4/21/2018 6:16 | 1.7 | 19.5 | 6.1 | 4.4 | 0.1769 | 2.6 |
| 4/21/2018 6:17 | 3.7 | 19.9 | 6.1 | 4.4 | 0.1563 | 2.7 |
| 4/21/2018 6:18 | 3.1 | 19.5 | 6.1 | 4.4 | 0.1756 | 2.7 |
| 4/21/2018 6:19 | 3.3 | 19.5 | 6.2 | 4.5 | 0.1633 | 2.7 |
| 4/21/2018 6:20 | 1   | 19.7 | 6.2 | 4.5 | 0.1736 | 2.6 |
| 4/21/2018 6:21 | 2.3 | 19.8 | 6.1 | 4.5 | 0.1768 | 2.5 |
| 4/21/2018 6:22 | 1.7 | 19.7 | 6.2 | 4.4 | 0.164  | 2.5 |
| 4/21/2018 6:23 | 1.9 | 19.7 | 6.2 | 4.4 | 0.1871 | 2.4 |
| 4/21/2018 6:24 | 3.2 | 19.8 | 6.2 | 4.4 | 0.1605 | 2.5 |
| 4/21/2018 6:25 | 2.1 | 19.6 | 6.3 | 4.4 | 0.1785 | 2.6 |
| 4/21/2018 6:26 | 2.1 | 19.7 | 6.2 | 4.4 | 0.1663 | 2.6 |
| 4/21/2018 6:27 | 3   | 19.8 | 6.2 | 4.4 | 0.1693 | 2.7 |
| 4/21/2018 6:28 | 1.2 | 19.6 | 6.4 | 4.4 | 0.1684 | 2.6 |
| 4/21/2018 6:29 | 2.5 | 19.5 | 6.4 | 4.4 | 0.1696 | 2.7 |
| 4/21/2018 6:30 | 3.1 | 19.5 | 6.6 | 4.4 | 0.1816 | 2.7 |
| 4/21/2018 6:31 | 1.6 | 19.4 | 6.9 | 4.4 | 0.1598 | 2.6 |
| 4/21/2018 6:32 | 3.2 | 19.5 | 6.9 | 4.3 | 0.1775 | 2.7 |
| 4/21/2018 6:33 | 2.6 | 19.6 | 7   | 4.3 | 0.1677 | 2.8 |
| 4/21/2018 6:34 | 2.9 | 19.5 | 7   | 4.2 | 0.179  | 2.7 |
| 4/21/2018 6:35 | 1.7 | 19.4 | 6.8 | 4.2 | 0.171  | 2.2 |
| 4/21/2018 6:36 | 3.1 | 19.4 | 7   | 4.1 | 0.166  | 2.2 |
| 4/21/2018 6:37 | 4.2 | 19.5 | 6.8 | 4.1 | 0.1767 | 2.3 |
| 4/21/2018 6:38 | 3.1 | 19.7 | 6.7 | 4.1 | 0.1654 | 2.1 |
| 4/21/2018 6:39 | 2.6 | 19.5 | 6.6 | 4.1 | 0.1761 | 2.2 |
| 4/21/2018 6:40 | 2.6 | 19.5 | 6.5 | 4.1 | 0.1661 | 2.3 |
| 4/21/2018 6:41 | 3.1 | 19.5 | 6.5 | 4.1 | 0.1765 | 2.5 |
| 4/21/2018 6:42 | 2.2 | 19.3 | 6.5 | 4.2 | 0.1671 | 2.5 |
| 4/21/2018 6:43 | 3.1 | 19.5 | 6.5 | 4.2 | 0.1705 | 2.6 |
| 4/21/2018 6:44 | 2.4 | 19.5 | 6.6 | 4.2 | 0.1776 | 2.5 |
| 4/21/2018 6:45 | 3.5 | 19.6 | 6.6 | 4.2 | 0.1664 | 2.5 |
| 4/21/2018 6:46 | 2.9 | 19.4 | 6.7 | 4.2 | 0.18   | 2.4 |
| 4/21/2018 6:47 | 1.9 | 19.5 | 6.6 | 4.2 | 0.161  | 2.2 |
| 4/21/2018 6:48 | 2.5 | 19.4 | 6.3 | 4.3 | 0.1736 | 2.3 |
| 4/21/2018 6:49 | 2.1 | 19.5 | 6.3 | 4.3 | 0.17   | 2.2 |
| 4/21/2018 6:50 | 2.6 | 19.5 | 6.2 | 4.4 | 0.169  | 2.2 |
| 4/21/2018 6:51 | 3.1 | 19.4 | 6.2 | 4.4 | 0.1755 | 2.2 |

|                |     |      |     |     |        |     |
|----------------|-----|------|-----|-----|--------|-----|
| 4/21/2018 6:52 | 1   | 19.4 | 6.2 | 4.5 | 0.1634 | 2.2 |
| 4/21/2018 6:53 | 1.6 | 19.6 | 6.2 | 4.5 | 0.1716 | 2.1 |
| 4/21/2018 6:54 | 2.6 | 19.9 | 6.3 | 4.5 | 0.169  | 2.1 |
| 4/21/2018 6:55 | 2.5 | 19.6 | 6.2 | 4.5 | 0.1737 | 2.2 |
| 4/21/2018 6:56 | 4.4 | 19.7 | 6.4 | 4.5 | 0.1703 | 2.2 |
| 4/21/2018 6:57 | 2.9 | 19.6 | 6.5 | 4.5 | 0.163  | 2.3 |
| 4/21/2018 6:58 | 1.3 | 19.6 | 6.3 | 4.5 | 0.1771 | 2.1 |
| 4/21/2018 6:59 | 3.1 | 19.7 | 6.3 | 4.5 | 0.164  | 2.2 |
| 4/21/2018 7:00 | 2   | 19.8 | 6.5 | 4.5 | 0.1722 | 2.3 |
| 4/21/2018 7:01 | 2   | 19.4 | 6.3 | 4.5 | 0.1684 | 2.2 |
| 4/21/2018 7:02 | 3.6 | 19.7 | 6.3 | 4.5 | 0.1687 | 2   |
| 4/21/2018 7:03 |     | 19.5 | 6.4 | 4.5 | 0.177  | 1.9 |
| 4/21/2018 7:04 |     | 19.6 | 6.4 | 4.5 | 0.1722 | 1.9 |
| 4/21/2018 7:05 | 3.7 | 19.3 | 6.7 | 4.5 | 0.1768 | 2   |
| 4/21/2018 7:06 |     | 19.6 | 6.6 | 4.5 | 0.1609 | 1.9 |
| 4/21/2018 7:07 | 3   | 19.5 | 7.2 | 4.4 | 0.1718 | 1.9 |
| 4/21/2018 7:08 | 4.4 | 19.4 | 7.2 | 4.4 | 0.1665 | 1.9 |
| 4/21/2018 7:09 |     | 19.3 | 7.1 | 4.3 | 0.1674 | 2   |
| 4/21/2018 7:10 | 2.4 | 19.4 | 7.5 | 4.3 | 0.1783 | 2.1 |
| 4/21/2018 7:11 | 5.2 | 19.3 | 6.9 | 4.3 | 0.165  | 2.2 |
| 4/21/2018 7:12 | 3.1 | 19.4 | 7.2 | 4.2 | 0.1793 | 2.1 |
| 4/21/2018 7:13 |     | 19.4 | 7.2 | 4.2 | 0.1603 | 2.1 |
| 4/21/2018 7:14 |     | 19.5 | 6.8 | 4.2 | 0.1688 | 2.1 |
| 4/21/2018 7:15 | 2.5 | 19.6 | 6.6 | 4.2 | 0.1651 | 2.2 |
| 4/21/2018 7:16 | 5.3 | 19.4 | 6.6 | 4.3 | 0.1705 | 2.3 |
| 4/21/2018 7:17 | 3.2 | 19.4 | 6.6 | 4.3 | 0.1822 | 2.3 |
| 4/21/2018 7:18 | 3.1 | 19.8 | 6.6 | 4.3 | 0.163  | 2.3 |
| 4/21/2018 7:19 | 3.5 | 19.4 | 6.6 | 4.4 | 0.1734 | 2.3 |
| 4/21/2018 7:20 | 3   | 19.6 | 6.7 | 4.4 | 0.1557 | 2.2 |
| 4/21/2018 7:21 | 4   | 19.4 | 6.7 | 4.4 | 0.1774 | 2.2 |
| 4/21/2018 7:22 | 3.8 | 19.7 | 6.5 | 4.4 | 0.1701 | 2.2 |
| 4/21/2018 7:23 | 2   | 19.4 | 6.7 | 4.4 | 0.1677 | 2.1 |
| 4/21/2018 7:24 | 2.5 | 19.4 | 6.9 | 4.4 | 0.1763 | 2.2 |
| 4/21/2018 7:25 | 3.3 | 19.4 | 6.8 | 4.4 | 0.1616 | 2.2 |
| 4/21/2018 7:26 | 4   | 19.5 | 6.6 | 4.4 | 0.1701 | 1.9 |
| 4/21/2018 7:27 | 2.9 | 19.6 | 6.6 | 4.4 | 0.1647 | 1.8 |
| 4/21/2018 7:28 | 2.1 | 19.5 | 6.6 | 4.5 | 0.1826 | 1.9 |
| 4/21/2018 7:29 | 2.8 | 19.7 | 6.5 | 4.5 | 0.1676 | 1.9 |
| 4/21/2018 7:30 | 2.7 | 19.7 | 6.6 | 4.5 | 0.1643 | 1.9 |
| 4/21/2018 7:31 | 2.9 | 19.5 | 6.5 | 4.5 | 0.1693 | 2   |
| 4/21/2018 7:32 | 1.6 | 19.2 | 6.8 | 4.6 | 0.1607 | 1.9 |
| 4/21/2018 7:33 | 2   | 19.6 | 6.8 | 4.6 | 0.178  | 1.8 |
| 4/21/2018 7:34 | 1.6 | 19.5 | 6.7 | 4.6 | 0.1654 | 1.8 |
| 4/21/2018 7:35 | 3.2 | 19.3 | 6.7 | 4.6 | 0.1666 | 1.9 |
| 4/21/2018 7:36 | 1.4 | 19.5 | 6.7 | 4.6 | 0.1707 | 1.9 |
| 4/21/2018 7:37 | 2.9 | 19.4 | 6.6 | 4.6 | 0.1615 | 2   |
| 4/21/2018 7:38 | 2.8 | 19.5 | 6.8 | 4.6 | 0.1817 | 2   |

|                |     |      |      |       |      |      |        |     |
|----------------|-----|------|------|-------|------|------|--------|-----|
| 4/21/2018 7:39 |     |      | 1    | 19.4  | 6.6  | 4.6  | 0.1616 | 2.1 |
| 4/21/2018 7:40 |     |      | 3.1  | 19.6  | 6.5  | 4.6  | 0.1762 | 2.2 |
| 4/21/2018 7:41 |     |      | 3.7  | 19.4  | 6.6  | 4.6  | 0.1691 | 2.2 |
| 4/21/2018 7:42 |     |      | 2.5  | 19.3  | 6.6  | 4.6  | 0.1724 | 2.2 |
| 4/21/2018 7:43 |     |      | 2.2  | 19.3  | 6.9  | 4.6  | 0.185  | 2.2 |
| 4/21/2018 7:44 |     |      | 2.2  | 19.5  | 7.1  | 4.6  | 0.1588 | 2.3 |
| 4/21/2018 7:45 |     |      | 3.7  | 19.3  | 7.1  | 4.6  | 0.1755 | 2.3 |
| 4/21/2018 7:46 |     |      | 2.5  | 19.4  | 7.2  | 4.6  | 0.1666 | 2.3 |
| 4/21/2018 7:47 |     |      | 4.5  | 19.5  | 7.2  | 4.6  | 0.1808 | 2.3 |
| 4/21/2018 7:48 |     |      | 3.5  | 18.5  | 7.2  | 4.6  | 0.1681 | 2.3 |
| 4/21/2018 7:49 |     |      | 3.6  | 19.1  | 7.4  | 4.6  | 0.1686 | 2.3 |
| 4/21/2018 7:50 |     |      | 2.9  | 18.8  | 7.4  | 4.6  | 0.1744 | 2.2 |
| 4/21/2018 7:51 |     |      | 2.7  | 19    | 7.6  | 4.5  | 0.1637 | 2.2 |
| 4/21/2018 7:52 |     |      | 2.3  | 19.6  | 7.4  | 4.5  | 0.1748 | 2.2 |
| 4/21/2018 7:53 |     |      | 3.2  | 19.2  | 7.1  | 4.5  | 0.161  | 2.1 |
| 4/21/2018 7:54 | 0.5 | -1.8 | 3.7  | 19.4  | 7.1  | 4.5  | 0.178  | 2.1 |
| 4/21/2018 7:55 | 0.4 | -1.2 | 4.1  | 19.3  | 7.1  | 4.5  | 0.165  | 1.9 |
| 4/21/2018 7:56 | 0.4 | -1.4 | 2.4  | 19.2  | 7    | 4.4  | 0.1658 | 2.1 |
| 4/21/2018 7:57 | 0.5 | -1.1 | 3.7  | 19.2  | 7    | 4.4  | 0.1701 | 2.2 |
| 4/21/2018 7:58 | 0.5 | -0.5 | 2.9  | 19.4  | 7    | 4.5  | 0.1559 | 2.3 |
| 4/21/2018 7:59 | 0.5 | 0.1  | 2.1  | 19.2  | 7.1  | 4.5  | 0.1764 | 2.3 |
| 4/21/2018 8:00 | 0.5 | -0.4 | 2.6  | 19.2  | 7.1  | 4.5  | 0.1675 | 2.5 |
| 4/21/2018 8:01 | 0.5 | 0    | 3.6  | 19.2  | 6.8  | 4.5  | 0.1706 | 2.4 |
| 4/21/2018 8:02 | 0.4 | 0.5  | 2.8  | 19    | 6.7  | 4.5  | 0.1659 | 2.5 |
| 4/21/2018 8:03 | 0.4 | 0    | 3.2  | 19.3  | 6.6  | 4.5  | 0.1642 | 2.5 |
| 4/21/2018 8:04 | 0.4 | 4    | 13.9 | 44.3  | 9.4  | 4.7  | 0.1914 | 2.5 |
| 4/21/2018 8:05 | 0.4 | 6.5  | 59.3 | 186.7 | 62.6 | 14.1 | 6.221  | 3.5 |
| 4/21/2018 8:06 | 0.3 | 0.2  | 6.7  | 29.3  | 10.2 | 11.2 | 0.701  | 2.8 |
| 4/21/2018 8:07 | 0.3 | 0.1  | 7.9  | 33.6  | 12.6 | 15.7 | 0.667  | 2.6 |
| 4/21/2018 8:08 | 0.2 | 0.4  | 5.7  | 28.7  | 12.1 | 15.4 | 0.557  | 2.5 |
| 4/21/2018 8:09 | 0.1 | 0.1  | 5.5  | 27.4  | 12.1 | 15.5 | 0.5263 | 2.4 |
| 4/21/2018 8:10 | 0.2 | 0.4  | 5.3  | 25.9  | 11.7 | 15.5 | 0.4756 | 2.3 |
| 4/21/2018 8:11 | 0.2 | 0.7  | 5    | 25.7  | 11.6 | 15.5 | 0.4859 | 2.2 |
| 4/21/2018 8:12 | 0.2 | 0.7  | 5.3  | 25.3  | 11.5 | 15.5 | 0.4675 | 2.2 |
| 4/21/2018 8:13 | 0.2 | -0.1 | 5.7  | 25.3  | 11.5 | 15.5 | 0.4764 | 1.9 |
| 4/21/2018 8:14 | 0.2 | 0.2  | 6    | 24.8  | 11.3 | 15.4 | 0.4563 | 1.9 |
| 4/21/2018 8:15 | 0.2 | 0.1  | 5.2  | 24    | 11   | 15.3 | 0.4446 | 1.9 |
| 4/21/2018 8:16 | 0.2 | 0.2  | 4.7  | 24.2  | 10.8 | 15.2 | 0.4316 | 1.9 |
| 4/21/2018 8:17 | 0.2 | -0.1 | 5.4  | 23.6  | 10.7 | 15   | 0.4232 | 1.9 |
| 4/21/2018 8:18 | 0.3 | 0.6  | 4.4  | 24    | 10.7 | 14.8 | 0.4377 | 2   |
| 4/21/2018 8:19 | 0.3 | 0.8  | 4.2  | 23.9  | 10.7 | 14.6 | 0.4307 | 2   |
| 4/21/2018 8:20 | 0.2 | 0.2  | 5.1  | 23.8  | 10.5 | 14.5 | 0.4322 | 2.1 |
| 4/21/2018 8:21 | 0.3 | -0.1 | 4.8  | 22.9  | 10.2 | 14.3 | 0.4191 | 2.2 |
| 4/21/2018 8:22 | 0.3 | 0.8  | 4.1  | 23    | 10   | 14   | 0.4114 | 2.2 |
| 4/21/2018 8:23 | 0.3 | 0.2  | 4.9  | 23.1  | 9.9  | 13.8 | 0.413  | 2.2 |
| 4/21/2018 8:24 | 0.3 | 0.7  | 2.5  | 23.2  | 9.9  | 13.7 | 0.4169 | 2.2 |
| 4/21/2018 8:25 | 0.3 | 1.4  | 4.2  | 23.1  | 9.8  | 13.5 | 0.4215 | 2.2 |

|                |     |      |     |      |     |      |        |     |
|----------------|-----|------|-----|------|-----|------|--------|-----|
| 4/21/2018 8:26 | 0.3 | -0.1 | 4.5 | 23.3 | 9.9 | 13.5 | 0.4136 | 2.3 |
| 4/21/2018 8:27 | 0.3 | 1.4  | 3.7 | 23   | 9.9 | 13.3 | 0.4212 | 2.3 |
| 4/21/2018 8:28 | 0.3 | 0.8  | 5.5 | 23   | 9.7 | 13.2 | 0.3973 | 2.3 |
| 4/21/2018 8:29 | 0.3 | 0.3  | 5.4 | 22.8 | 9.6 | 13.1 | 0.4046 | 2.3 |
| 4/21/2018 8:30 | 0.3 | 0.1  | 3.8 | 22.8 | 9.5 | 13.1 | 0.3982 | 2.3 |
| 4/21/2018 8:31 | 0.3 | 1.2  | 5.2 | 22.9 | 9.5 | 13.1 | 0.4025 | 2.3 |
| 4/21/2018 8:32 | 0.3 | 1.4  | 5.5 | 22.3 | 9.3 | 13   | 0.4026 | 2.4 |
| 4/21/2018 8:33 | 0.3 | 0.7  | 5   | 22.3 | 9.2 | 12.9 | 0.391  | 2.4 |
| 4/21/2018 8:34 | 0.3 | 0.3  | 5.2 | 22.3 | 9.3 | 12.9 | 0.4034 | 2.3 |
| 4/21/2018 8:35 | 0.2 | 0.5  | 4.6 | 21.8 | 8.9 | 12.7 | 0.3753 | 2.2 |
| 4/21/2018 8:36 | 0.2 | 0.1  | 4.1 | 22.2 | 9   | 12.6 | 0.3983 | 2.1 |
| 4/21/2018 8:37 | 0.2 | 0.6  | 4.8 | 22.6 | 9.2 | 12.5 | 0.3902 | 2.1 |
| 4/21/2018 8:38 | 0.2 | 1.2  | 4.4 | 22.1 | 9   | 12.4 | 0.3856 | 1.9 |
| 4/21/2018 8:39 | 0.3 | 0.6  | 4.5 | 22.2 | 9   | 12.3 | 0.3997 | 2   |
| 4/21/2018 8:40 | 0.3 | 0.9  | 4.4 | 22.1 | 9   | 12.3 | 0.3893 | 2.2 |
| 4/21/2018 8:41 | 0.3 | 0.5  | 4.6 | 22   | 8.8 | 12.3 | 0.3801 | 2.3 |
| 4/21/2018 8:42 | 0.3 | 0    | 6   | 22   | 8.7 | 12.3 | 0.3748 | 2.3 |
| 4/21/2018 8:43 | 0.3 | 0.3  | 4.5 | 21.9 | 8.5 | 12.2 | 0.3796 | 2.3 |
| 4/21/2018 8:44 | 0.3 | 0.5  | 4.6 | 21.3 | 8.5 | 12.2 | 0.3639 | 2.2 |
| 4/21/2018 8:45 | 0.4 | 0.4  | 4.1 | 21.5 | 8.3 | 12.1 | 0.3728 | 1.8 |
| 4/21/2018 8:46 | 0.3 | 0.5  | 5   | 21.4 | 8.2 | 11.9 | 0.37   | 1.6 |
| 4/21/2018 8:47 | 0.3 | 0.1  | 2.9 | 21.7 | 8.3 | 11.8 | 0.3684 | 1.6 |
| 4/21/2018 8:48 | 0.3 | 0.2  | 4.5 | 21.4 | 8.2 | 11.7 | 0.3745 | 1.6 |
| 4/21/2018 8:49 | 0.4 | 0.5  | 3.5 | 21.4 | 8   | 11.6 | 0.3535 | 1.6 |
| 4/21/2018 8:50 | 0.4 | 1.2  | 4.8 | 21.2 | 8.1 | 11.4 | 0.362  | 1.6 |
| 4/21/2018 8:51 | 0.4 | 0.7  | 4.2 | 21.1 | 7.9 | 11.3 | 0.3525 | 1.6 |
| 4/21/2018 8:52 | 0.4 | 0.2  | 5.2 | 21.2 | 7.9 | 11.2 | 0.3616 | 1.6 |
| 4/21/2018 8:53 | 0.4 | 1.1  | 4.1 | 21.2 | 7.8 | 11.1 | 0.353  | 1.6 |
| 4/21/2018 8:54 | 0.4 | 0.5  | 4   | 21.2 | 7.8 | 11   | 0.3507 | 1.6 |
| 4/21/2018 8:55 | 0.4 | 0.2  | 3.7 | 20.9 | 7.7 | 11   | 0.3587 | 1.6 |
| 4/21/2018 8:56 | 0.4 | 0.3  | 3.1 | 21.3 | 7.7 | 10.8 | 0.3456 | 1.6 |
| 4/21/2018 8:57 | 0.4 | 0.7  | 3.8 | 21   | 7.7 | 10.8 | 0.3557 | 1.6 |
| 4/21/2018 8:58 | 0.3 | 0.6  | 5.2 | 20.9 | 7.6 | 10.7 | 0.3364 | 1.7 |
| 4/21/2018 8:59 | 0.3 | 0.9  | 3.9 | 20.9 | 7.4 | 10.6 | 0.3353 | 1.6 |
| 4/21/2018 9:00 | 0.4 | 0.2  | 3.3 | 21   | 7.5 | 10.6 | 0.3457 | 1.6 |
| 4/21/2018 9:01 | 0.4 | 0.7  | 4.2 | 20.8 | 7.5 | 10.5 | 0.3386 | 1.7 |
| 4/21/2018 9:02 | 0.4 | 0.3  | 3.7 | 20.8 | 7.4 | 10.5 | 0.3519 | 1.7 |
| 4/21/2018 9:03 | 0.4 | 0.5  | 3.9 | 20.9 | 7.4 | 10.4 | 0.3355 | 1.7 |
| 4/21/2018 9:04 | 0.4 | 0.9  | 4.4 | 20.6 | 7.3 | 10.3 | 0.3341 | 1.6 |
| 4/21/2018 9:05 | 0.3 | 1.1  | 3.1 | 20.7 | 7.2 | 10.2 | 0.3283 | 1.7 |
| 4/21/2018 9:06 | 0.3 | 0.7  | 5.1 | 21   | 7.3 | 10.2 | 0.3315 | 1.7 |
| 4/21/2018 9:07 | 0.3 | 0.7  | 4.3 | 20.8 | 7.3 | 10.2 | 0.3388 | 1.7 |
| 4/21/2018 9:08 | 0.3 | 0.3  | 5.5 | 20.8 | 7.2 | 10.2 | 0.3257 | 1.7 |
| 4/21/2018 9:09 | 0.3 | 0.4  | 4   | 20.5 | 7.2 | 10.1 | 0.3291 | 1.7 |
| 4/21/2018 9:10 | 0.3 | 0.5  | 3.3 | 20.3 | 7.1 | 10.1 | 0.3152 | 1.7 |
| 4/21/2018 9:11 | 0.3 | 0.6  | 4   | 20.5 | 7.1 | 10   | 0.3405 | 1.6 |
| 4/21/2018 9:12 | 0.3 | 0.8  | 4.2 | 20.5 | 7.1 | 10   | 0.3284 | 1.6 |

|                |     |      |      |      |      |      |        |     |
|----------------|-----|------|------|------|------|------|--------|-----|
| 4/21/2018 9:13 | 0.3 | 0.2  | 4.7  | 20.4 | 7    | 10   | 0.3273 | 1.7 |
| 4/21/2018 9:14 | 0.3 | 1.2  | 4.4  | 20.5 | 7    | 9.9  | 0.3349 | 1.7 |
| 4/21/2018 9:15 | 0.3 | 0.2  | 3.2  | 20.8 | 7    | 9.9  | 0.3213 | 1.7 |
| 4/21/2018 9:16 | 0.3 | 1.1  | 2.6  | 20.6 | 7    | 9.8  | 0.3329 | 1.7 |
| 4/21/2018 9:17 | 0.3 | 0.9  | 2.9  | 20.7 | 6.9  | 9.8  | 0.321  | 1.7 |
| 4/21/2018 9:18 | 0.3 | -0.2 | 3.3  | 20.5 | 6.9  | 9.8  | 0.3303 | 1.7 |
| 4/21/2018 9:19 | 0.2 | 0.4  | 4.3  | 20.6 | 6.9  | 9.8  | 0.3241 | 1.7 |
| 4/21/2018 9:20 | 0.2 | 0.7  | 4    | 20.5 | 6.9  | 9.8  | 0.319  | 1.7 |
| 4/21/2018 9:21 | 0.3 | 0.6  | 3    | 20.3 | 7.1  | 9.7  | 0.3112 | 1.7 |
| 4/21/2018 9:22 | 0.4 | 2.1  | 3.2  | 20   | 7.8  | 9.5  | 0.2787 | 1.7 |
| 4/21/2018 9:23 | 0.6 | 1.7  | 4.6  | 19.8 | 8    | 9.2  | 0.2876 | 1.7 |
| 4/21/2018 9:24 | 0.8 | 1.2  | 2.7  | 19.8 | 8.3  | 8.8  | 0.2698 | 1.8 |
| 4/21/2018 9:25 | 0.9 | 0.6  | 3.8  | 19.7 | 8.4  | 8.4  | 0.2718 | 1.8 |
| 4/21/2018 9:26 | 1   | 1.4  | 3    | 19.9 | 8.7  | 7.9  | 0.2523 | 1.9 |
| 4/21/2018 9:27 | 1.1 | 1.6  | 5    | 19.4 | 9.1  | 7.5  | 0.238  | 2   |
| 4/21/2018 9:28 | 1.2 | 1.1  | 5.1  | 19.4 | 9.2  | 6.9  | 0.2468 | 2   |
| 4/21/2018 9:29 | 1.2 | 1.1  | 3.9  | 19.4 | 9.4  | 6.4  | 0.2324 | 1.9 |
| 4/21/2018 9:30 | 1.2 | 2.5  | 3.9  | 19.4 | 9.6  | 6.1  | 0.2405 | 1.9 |
| 4/21/2018 9:31 | 1.4 | 2.4  | 3.7  | 19.4 | 10   | 5.7  | 0.211  | 1.9 |
| 4/21/2018 9:32 | 1.6 | 2.8  | 4.2  | 19.7 | 10.2 | 5.3  | 0.2148 | 1.9 |
| 4/21/2018 9:33 | 1.7 | 2.2  | 1.4  | 19.2 | 10   | 5    | 0.2073 | 1.8 |
| 4/21/2018 9:34 | 1.8 | 2.6  | 4.3  | 19.8 | 10   | 4.7  | 0.2116 | 1.7 |
| 4/21/2018 9:35 | 1.8 | 2.4  | 2.9  | 19.2 | 10.6 | 4.5  | 0.2083 | 1.7 |
| 4/21/2018 9:36 | 1.8 | 2.6  | 3.1  | 19.5 | 10.6 | 4.3  | 0.201  | 1.7 |
| 4/21/2018 9:37 | 2   | 2.5  | 3.7  | 19.3 | 10.7 | 4.1  | 0.2071 | 1.8 |
| 4/21/2018 9:38 | 2   | 2.4  | 3.9  | 19.7 | 10.8 | 3.9  | 0.1911 | 1.9 |
| 4/21/2018 9:39 | 2.1 | 3    | 3.6  | 19.7 | 10.9 | 3.8  | 0.2015 | 1.8 |
| 4/21/2018 9:40 | 2.3 | 3    | 4.9  | 19.9 | 11   | 3.6  | 0.1846 | 1.7 |
| 4/21/2018 9:41 | 2.4 | 2.9  | 3.6  | 19.9 | 11.1 | 3.5  | 0.1948 | 1.8 |
| 4/21/2018 9:42 | 2.5 | 3    | 4    | 19.9 | 11.1 | 3.4  | 0.1886 | 1.9 |
| 4/21/2018 9:43 | 2.6 | 3.2  | 3.9  | 20.1 | 11   | 3.3  | 0.1858 | 2   |
| 4/21/2018 9:44 | 2.8 | 3.7  | 4.3  | 20.2 | 10.9 | 3.2  | 0.1928 | 2   |
| 4/21/2018 9:45 | 2.8 | 3.4  | 3    | 19.7 | 10.8 | 3.1  | 0.1844 | 2.1 |
| 4/21/2018 9:46 | 2.7 | 3.1  | 4.2  | 19.8 | 10.8 | 3.1  | 0.1954 | 2.2 |
| 4/21/2018 9:47 | 2.6 | 3.1  | 3.3  | 20   | 10.8 | 3    | 0.1828 | 2.2 |
| 4/21/2018 9:48 | 2.4 | 2.5  | 4.1  | 19.6 | 10.6 | 3    | 0.1972 | 2.1 |
| 4/21/2018 9:49 | 2.4 | 2.7  | 3.5  | 19.7 | 10.8 | 3    | 0.1806 | 2.1 |
| 4/21/2018 9:50 | 2.2 | 2.5  | 4.5  | 19.6 | 10.6 | 3    | 0.1854 | 2   |
| 4/21/2018 9:51 | 2.1 | 2.4  | 4.7  | 19.6 | 10.5 | 3    | 0.1814 | 2   |
| 4/21/2018 9:52 | 1.9 | 1.8  | 4    | 20.3 | 10.5 | 3.1  | 0.1919 | 2   |
| 4/21/2018 9:53 | 1.7 | 1.7  | 8.7  | 33.2 | 17   | 20   | 0.4884 | 2   |
| 4/21/2018 9:54 | 1.3 | 1.6  | 11.8 | 41.6 | 19.2 | 21   | 0.8031 | 2   |
| 4/21/2018 9:55 | 0.9 | 1    | 12.8 | 44.6 | 21.1 | 24.2 | 1.0109 | 2   |
| 4/21/2018 9:56 | 0.6 | 0.1  | 12.8 | 52.5 | 22.8 | 26.9 | 1.331  | 2.1 |
| 4/21/2018 9:57 | 0.4 | 0.3  |      | 49.2 | 23   | 27.6 | 1.3523 | 2.1 |
| 4/21/2018 9:58 | 0.3 | 0.6  |      | 48.3 | 22.4 | 27.5 | 1.3444 | 2   |
| 4/21/2018 9:59 | 0.2 | 0.7  | 19   | 50.2 | 22.6 | 27.4 | 1.3998 | 2.1 |

|                 |     |     |      |      |      |      |        |     |
|-----------------|-----|-----|------|------|------|------|--------|-----|
| 4/21/2018 10:00 | 0.2 | 0.5 | 13.2 | 49.7 | 23   | 27.5 | 1.4384 | 2.2 |
| 4/21/2018 10:01 | 0.2 | 0.8 | 15.2 | 49.8 | 22.8 | 27.5 | 1.4232 | 2.2 |
| 4/21/2018 10:02 | 0.2 | 0.6 | 13.8 | 48.9 | 22.9 | 27.5 | 1.4372 | 2.2 |
| 4/21/2018 10:03 | 0.2 | 0.9 | 14.6 | 47.1 | 22.3 | 27.5 | 1.3916 | 2   |
| 4/21/2018 10:04 | 0.2 | 0.2 | 14.1 | 46.7 | 21.8 | 27.4 | 1.3882 | 1.9 |
| 4/21/2018 10:05 | 0.2 | 0.6 | 14.1 | 45.8 | 21.6 | 27.3 | 1.3646 | 1.9 |
| 4/21/2018 10:06 | 0.2 | 0.5 | 12.3 | 45.3 | 21.6 | 27.2 | 1.3652 | 1.8 |
| 4/21/2018 10:07 | 0.1 | 0.5 |      | 44.8 | 21.2 | 27.1 | 1.3657 | 1.8 |
| 4/21/2018 10:08 | 0.2 | 1.2 | 12.5 | 43.7 | 20.6 | 26.9 | 1.3226 | 1.9 |
| 4/21/2018 10:09 | 0.2 | 0.6 | 13.6 | 43   | 20.4 | 26.6 | 1.3283 | 1.8 |
| 4/21/2018 10:10 | 0.2 | 0.4 |      | 42.9 | 20.3 | 26.3 | 1.3161 | 1.8 |
| 4/21/2018 10:11 | 0.2 | 0.6 | 14.2 | 41.8 | 20.2 | 26   | 1.3167 | 1.8 |
| 4/21/2018 10:12 | 0.2 | 0.3 | 12.7 | 40.9 | 19.6 | 25.8 | 1.2803 | 1.8 |
| 4/21/2018 10:13 | 0.2 | 0.3 | 12.6 | 40.9 | 19.4 | 25.6 | 1.2924 | 1.8 |
| 4/21/2018 10:14 | 0.2 | 0.8 | 12.5 | 40.4 | 19.3 | 25.4 | 1.2788 | 1.8 |
| 4/21/2018 10:15 | 0.3 | 0.2 | 10.5 | 38.7 | 18.8 | 25.1 | 1.2445 | 1.8 |
| 4/21/2018 10:16 | 0.3 | 0.4 | 11.3 | 38.9 | 18.2 | 24.8 | 1.2164 | 1.8 |
| 4/21/2018 10:17 | 0.3 | 0.7 | 12   | 37.8 | 18.3 | 24.6 | 1.2205 | 1.8 |
| 4/21/2018 10:18 | 0.3 | 0.8 | 11.6 | 37.7 | 17.9 | 24.4 | 1.2078 | 1.8 |
| 4/21/2018 10:19 | 0.3 | 0.6 | 11.8 | 37.5 | 18   | 24.2 | 1.2132 | 1.8 |
| 4/21/2018 10:20 | 0.3 | 0.1 | 10.7 | 37.5 | 17.8 | 24   | 1.2201 | 1.8 |
| 4/21/2018 10:21 | 0.2 | 0.6 | 10.8 | 36.1 | 17.8 | 23.7 | 1.1956 | 1.8 |
| 4/21/2018 10:22 | 0.2 | 0.4 | 10.9 | 36.3 | 17.7 | 23.5 | 1.1868 | 1.8 |
| 4/21/2018 10:23 | 0.3 | 0.5 | 10.5 | 35.2 | 16.9 | 23.3 | 1.17   | 1.9 |
| 4/21/2018 10:24 | 0.3 | 0.5 | 9.7  | 35.1 | 16.5 | 23.1 | 1.139  | 2   |
| 4/21/2018 10:25 | 0.3 | 0.7 | 11.1 | 34.9 | 16.5 | 22.9 | 1.1697 | 2   |
| 4/21/2018 10:26 | 0.3 | 0.2 | 9.9  | 34.2 | 16.2 | 22.6 | 1.1303 | 2   |
| 4/21/2018 10:27 | 0.3 | 1   | 10.7 | 34.3 | 16.1 | 22.4 | 1.1422 | 2.1 |
| 4/21/2018 10:28 | 0.3 | 1   | 10.7 | 33.4 | 15.9 | 22.1 | 1.1262 | 2.2 |
| 4/21/2018 10:29 | 0.3 | 0.4 | 9.7  | 32.9 | 15.7 | 21.9 | 1.123  | 2.3 |
| 4/21/2018 10:30 | 0.3 | 0.4 | 10.4 | 32.9 | 15.5 | 21.7 | 1.128  | 2.3 |
| 4/21/2018 10:31 | 0.2 | 1.3 | 9.4  | 32.9 | 15.2 | 21.4 | 1.0818 | 2.1 |
| 4/21/2018 10:32 | 0.2 | 0.8 | 9.6  | 32   | 15.2 | 21.2 | 1.1008 | 2   |
| 4/21/2018 10:33 | 0.2 | 1.3 | 10.3 | 32.2 | 14.9 | 21   | 1.0835 | 1.9 |
| 4/21/2018 10:34 | 0.2 | 1.2 | 10.5 | 31   | 14.7 | 20.8 | 1.0732 | 1.8 |
| 4/21/2018 10:35 | 0.2 | 0.9 | 10.5 | 31.3 | 14.5 | 20.6 | 1.0645 | 1.9 |
| 4/21/2018 10:36 | 0.2 | 0.3 | 9.3  | 30.9 | 14.3 | 20.4 | 1.039  | 1.9 |
| 4/21/2018 10:37 | 0.2 | 0.4 | 8.2  | 31.2 | 14.4 | 20.2 | 1.0847 | 1.9 |
| 4/21/2018 10:38 | 0.2 | 0.8 | 8.1  | 30.6 | 14.2 | 20   | 1.0547 | 1.9 |
| 4/21/2018 10:39 | 0.2 | 0.8 | 9.2  | 30.4 | 13.9 | 19.9 | 1.0443 | 1.9 |
| 4/21/2018 10:40 | 0.3 | 0.9 | 8    | 29.6 | 13.6 | 19.7 | 1.0157 | 1.8 |
| 4/21/2018 10:41 | 0.3 | 1.9 | 10.2 | 28.9 | 13.2 | 19.4 | 0.9828 | 1.8 |
| 4/21/2018 10:42 | 0.4 | 0.8 | 8.4  | 28.6 | 13   | 19.1 | 0.9698 | 1.9 |
| 4/21/2018 10:43 | 0.4 | 0.6 | 8.2  | 29.5 | 13   | 19   | 0.9889 | 1.8 |
| 4/21/2018 10:44 | 0.3 | 0.5 | 7.8  | 29.1 | 13.1 | 18.8 | 0.9998 | 1.9 |
| 4/21/2018 10:45 | 0.3 | 0.5 | 6.9  | 28.3 | 12.7 | 18.5 | 0.9568 | 1.9 |
| 4/21/2018 10:46 | 0.3 | 0.4 | 7.6  | 28   | 12.7 | 18.3 | 0.9746 | 1.9 |

|                 |     |     |     |      |      |      |        |     |
|-----------------|-----|-----|-----|------|------|------|--------|-----|
| 4/21/2018 10:47 | 0.3 | 0.4 | 7.9 | 28.4 | 12.6 | 18.1 | 0.9582 | 1.8 |
| 4/21/2018 10:48 | 0.3 | 1   | 6.4 | 27.1 | 12.2 | 17.8 | 0.9242 | 1.8 |
| 4/21/2018 10:49 | 0.4 | 1.1 | 7.9 | 26.5 | 11.7 | 17.4 | 0.8893 | 1.9 |
| 4/21/2018 10:50 | 0.5 | 0.8 | 9.6 | 25.4 | 11.2 | 17.2 | 0.8358 | 1.9 |
| 4/21/2018 10:51 | 0.5 | 1.2 | 6.7 | 25.1 | 10.9 | 16.7 | 0.8222 | 1.9 |
| 4/21/2018 10:52 | 0.6 | 1.3 | 7.1 | 25.5 | 10.9 | 16.1 | 0.8244 | 2   |
| 4/21/2018 10:53 | 0.7 | 1.2 | 7.4 | 24.7 | 10.7 | 15.5 | 0.7963 | 2   |
| 4/21/2018 10:54 | 0.7 | 1.1 | 8.4 | 25.8 | 10.7 | 15.1 | 0.8063 | 2   |
| 4/21/2018 10:55 | 0.6 | 0.7 | 7.9 | 25.9 | 11.2 | 14.8 | 0.8624 | 2.1 |
| 4/21/2018 10:56 | 0.6 | 1.2 | 7.1 | 25.8 | 11.1 | 14.5 | 0.8432 | 2.1 |
| 4/21/2018 10:57 | 0.5 | 1.2 | 6.8 | 25.2 | 10.9 | 14.3 | 0.8142 | 2.2 |
| 4/21/2018 10:58 | 0.5 | 1.7 | 7.7 | 26.1 | 10.9 | 14.2 | 0.8493 | 2   |
| 4/21/2018 10:59 | 0.4 | 0.4 | 7.5 | 26.2 | 11.2 | 14.3 | 0.8623 | 2.1 |
| 4/21/2018 11:00 | 0.3 | 0.6 | 6.8 | 26.8 | 11.4 | 14.5 | 0.9108 | 2.2 |
| 4/21/2018 11:01 | 0.3 | 0.5 | 7   | 26.6 | 11.4 | 14.7 | 0.8987 | 2.3 |
| 4/21/2018 11:02 | 0.2 | 0   | 6.9 | 25   | 11.2 | 14.9 | 0.885  | 2.3 |
| 4/21/2018 11:03 | 0.3 | 1.7 | 8.1 | 24.9 | 10.5 | 14.8 | 0.8137 | 2.2 |
| 4/21/2018 11:04 | 0.3 | 1   | 6.8 | 24.7 | 10.4 | 14.7 | 0.8004 | 2   |
| 4/21/2018 11:05 | 0.5 | 1.1 | 7.8 | 24.5 | 10.3 | 14.6 | 0.8008 | 2   |
| 4/21/2018 11:06 | 0.5 | 0.7 | 5.6 | 24   | 10.1 | 14.5 | 0.7703 | 2.1 |
| 4/21/2018 11:07 | 0.5 | 1.1 | 6.8 | 24.5 | 10   | 14.3 | 0.7673 | 2.2 |
| 4/21/2018 11:08 | 0.5 | 1.2 | 5.6 | 24.3 | 10   | 14   | 0.7733 | 2.3 |
| 4/21/2018 11:09 | 0.5 | 1   | 6.7 | 24.8 | 10.1 | 13.7 | 0.7905 | 2.2 |
| 4/21/2018 11:10 | 0.8 | 1.7 | 5.8 | 23.2 | 9.6  | 13.2 | 0.6593 | 1.9 |
| 4/21/2018 11:11 | 1.1 | 2.3 | 6.9 | 22.9 | 9.6  | 12.6 | 0.6036 | 2   |
| 4/21/2018 11:12 | 1.5 | 2.2 | 6.7 | 23.7 | 9.4  | 11.9 | 0.5909 | 2   |
| 4/21/2018 11:13 | 1.5 | 2.4 | 7.1 | 22.9 | 9.9  | 11.4 | 0.5678 | 2   |
| 4/21/2018 11:14 | 1.5 | 3.3 | 5.1 | 23   | 10.5 | 10.8 | 0.6115 | 2   |
| 4/21/2018 11:15 | 1.4 | 2.5 | 4.9 | 22.8 | 10.6 | 10.2 | 0.5734 | 2   |
| 4/21/2018 11:16 | 1.5 | 1.9 | 5.8 | 22.7 | 10.4 | 9.5  | 0.5463 | 2.1 |
| 4/21/2018 11:17 | 1.6 | 2.4 | 4.3 | 21.9 | 10.4 | 8.8  | 0.5058 | 2.1 |
| 4/21/2018 11:18 | 1.8 | 3   | 5.5 | 21.9 | 10.4 | 7.9  | 0.4665 | 2.2 |
| 4/21/2018 11:19 | 2   | 3.2 | 5.6 | 21.4 | 10.3 | 7.3  | 0.443  | 2.2 |
| 4/21/2018 11:20 | 2.2 | 3.4 | 5.8 | 21.5 | 10.2 | 6.9  | 0.4158 | 2.2 |
| 4/21/2018 11:21 | 2.4 | 3.1 | 5.5 | 21.3 | 10.1 | 6.3  | 0.4166 | 2   |
| 4/21/2018 11:22 | 2.5 | 3.6 | 6.6 | 21.5 | 10.1 | 5.7  | 0.3856 | 1.9 |
| 4/21/2018 11:23 | 2.6 | 3.2 | 5.7 | 21.6 | 10.1 | 5.2  | 0.3873 | 1.9 |
| 4/21/2018 11:24 | 2.7 | 3.7 | 4.7 | 21.3 | 10   | 4.8  | 0.3593 | 2   |
| 4/21/2018 11:25 | 2.9 | 3.8 | 6.5 | 21.3 | 10   | 4.4  | 0.352  | 2.1 |
| 4/21/2018 11:26 | 3.1 | 4.1 | 6.5 | 21.3 | 9.9  | 4.1  | 0.3331 | 2.1 |
| 4/21/2018 11:27 | 3.2 | 4   | 6.5 | 21.4 | 9.8  | 3.8  | 0.3299 | 2.1 |
| 4/21/2018 11:28 | 3.4 | 4.6 | 5.4 | 21.5 | 9.5  | 3.6  | 0.3031 | 2.2 |
| 4/21/2018 11:29 | 3.5 | 4.4 | 4.6 | 21.4 | 9.5  | 3.4  | 0.3056 | 2.2 |
| 4/21/2018 11:30 | 3.7 | 4.5 | 5.6 | 21.7 | 9.3  | 3.2  | 0.2943 | 2.2 |
| 4/21/2018 11:31 | 4   | 5.2 | 6.1 | 21.8 | 9.1  | 3.1  | 0.2788 | 2.2 |
| 4/21/2018 11:32 | 4.2 | 5.1 | 6.7 | 22.1 | 9    | 2.9  | 0.2772 | 2.1 |
| 4/21/2018 11:33 | 4.5 | 5.7 | 6   | 22.4 | 8.8  | 2.8  | 0.2534 | 2.1 |



|                 |      |      |      |      |      |      |        |     |
|-----------------|------|------|------|------|------|------|--------|-----|
| 4/21/2018 11:34 | 4.7  | 6.5  | 6.4  | 22.7 | 8.7  | 2.7  | 0.2603 | 2.1 |
| 4/21/2018 11:35 | 5.1  | 6.7  | 5.5  | 22.8 | 8.5  | 2.5  | 0.2485 | 2.1 |
| 4/21/2018 11:36 | 5.4  | 6.5  | 6.3  | 23.2 | 8.1  | 2.5  | 0.2404 | 2.1 |
| 4/21/2018 11:37 | 5.6  | 6.5  | 5.6  | 22.7 | 8.3  | 2.4  | 0.2392 | 2.1 |
| 4/21/2018 11:38 | 5.9  | 7.9  | 7.6  | 23.5 | 8.1  | 2.3  | 0.2322 | 2.2 |
| 4/21/2018 11:39 | 6.1  | 7.5  | 6.4  | 23.9 | 7.9  | 2.3  | 0.2237 | 2.2 |
| 4/21/2018 11:40 | 6.5  | 7.5  | 7.6  | 24   | 7.8  | 2.2  | 0.223  | 2.2 |
| 4/21/2018 11:41 | 6.8  | 7.4  | 7.4  | 23.9 | 7.7  | 2.1  | 0.2295 | 2   |
| 4/21/2018 11:42 | 7.1  | 8.9  | 8.2  | 25.3 | 7.1  | 2.1  | 0.2065 | 2.1 |
| 4/21/2018 11:43 | 8.4  | 14   | 10   | 28.7 | 6.3  | 2.1  | 0.2073 | 2   |
| 4/21/2018 11:44 | 10.5 | 14.3 | 10.4 | 29.8 | 6    | 2    | 0.1726 | 2   |
| 4/21/2018 11:45 | 12.6 | 15.1 | 9.3  | 30.6 | 6.2  | 1.9  | 0.1814 | 2   |
| 4/21/2018 11:46 | 13.1 | 12.1 | 8.9  | 28   | 6.3  | 1.8  | 0.1901 | 2   |
| 4/21/2018 11:47 | 12   | 10.6 | 7.5  | 26.7 | 6.6  | 1.8  | 0.1952 | 2   |
| 4/21/2018 11:48 | 10.5 | 9.9  | 7.3  | 26.2 | 6.7  | 1.8  | 0.2067 | 2.1 |
| 4/21/2018 11:49 | 9.5  | 9.4  | 7    | 25.9 | 6.7  | 1.8  | 0.1861 | 2   |
| 4/21/2018 11:50 | 9.1  | 9.1  | 8.8  | 26   | 6.7  | 1.8  | 0.2001 | 2.1 |
| 4/21/2018 11:51 | 8.9  | 9.1  | 6.8  | 25.5 | 6.7  | 1.8  | 0.1896 | 2.1 |
| 4/21/2018 11:52 | 8.5  | 8    | 8.9  | 25.4 | 6.7  | 1.9  | 0.2079 | 2.2 |
| 4/21/2018 11:53 | 7.8  | 7.1  | 9.5  | 31.9 | 11.5 | 7.4  | 0.3264 | 2.1 |
| 4/21/2018 11:54 | 6.4  | 4.7  | 13   | 49.5 | 21.8 | 18.9 | 0.7136 | 2.3 |
| 4/21/2018 11:55 | 4.3  | 2.8  | 16.2 | 59   | 31.5 | 28.1 | 1.1576 | 2.4 |
| 4/21/2018 11:56 | 2.4  | 1.2  | 17.8 | 63.1 | 33.6 | 29.6 | 1.4353 | 2.5 |
| 4/21/2018 11:57 | 1.2  | 1.5  | 16.3 | 64.3 | 34.2 | 30.1 | 1.4902 | 2.4 |
| 4/21/2018 11:58 | 0.8  | 0.9  | 17.2 | 65.6 | 33.9 | 29.7 | 1.5655 | 2.5 |
| 4/21/2018 11:59 | 0.6  | 0.5  | 16.2 | 63.9 | 33.2 | 29.7 | 1.5843 | 2.5 |
| 4/21/2018 12:00 | 0.5  | 0.7  | 18.8 | 61.6 | 33   | 29.5 | 1.5637 | 2.5 |
| 4/21/2018 12:01 | 0.5  | 1    | 15.2 | 60.7 | 32.5 | 29.4 | 1.5635 | 2.5 |
| 4/21/2018 12:02 | 0.5  | 0.8  | 16.4 | 57.2 | 31.2 | 29.3 | 1.5133 | 2.6 |
| 4/21/2018 12:03 | 0.6  | 1.6  | 14.9 | 56.3 | 30.6 | 29   | 1.4652 | 2.4 |
| 4/21/2018 12:04 | 0.6  | 0.8  | 14.1 | 52.7 | 29   | 28.4 | 1.395  | 2.4 |
| 4/21/2018 12:05 | 0.6  | 1.5  | 13.6 | 53.9 | 28.7 | 27.9 | 1.4008 | 2.5 |
| 4/21/2018 12:06 | 0.6  | 0.9  | 15   | 52   | 28.5 | 27.4 | 1.3835 | 2.6 |
| 4/21/2018 12:07 | 0.6  | 1    | 14.6 | 49.9 | 27.8 | 26.8 | 1.3608 | 2.6 |
| 4/21/2018 12:08 | 0.6  | 1    | 13.3 | 50.1 | 27.8 | 26.2 | 1.359  | 2.5 |
| 4/21/2018 12:09 | 0.7  | 1.4  | 13.6 | 49.8 | 27.4 | 25.7 | 1.3532 | 2.4 |
| 4/21/2018 12:10 | 0.6  | 1.1  | 14.1 | 50.9 | 27.7 | 25.1 | 1.3822 | 2.4 |
| 4/21/2018 12:11 | 0.6  | 0.5  | 14.8 | 49.6 | 27.8 | 24.7 | 1.3918 | 2.4 |
| 4/21/2018 12:12 | 0.5  | 0.2  | 13.2 | 47.7 | 27.1 | 24.3 | 1.3423 | 2.5 |
| 4/21/2018 12:13 | 0.5  | 1.2  | 13.2 | 46.7 | 26.3 | 24.1 | 1.3212 | 2.3 |
| 4/21/2018 12:14 | 0.6  | 1.6  | 13.4 | 45.3 | 25.5 | 23.8 | 1.2903 | 2.1 |
| 4/21/2018 12:15 | 0.6  | 1.3  | 13.9 | 44.9 | 25.4 | 23.5 | 1.29   | 2.3 |
| 4/21/2018 12:16 | 0.6  | 0.5  | 13.3 | 44.3 | 25.1 | 23.3 | 1.2787 | 2.4 |
| 4/21/2018 12:17 | 0.7  | 1.6  | 11.8 | 43.5 | 24.4 | 23   | 1.2605 | 2.4 |
| 4/21/2018 12:18 | 0.6  | 1.1  | 11.2 | 44.1 | 25.1 | 22.8 | 1.3028 | 2.5 |
| 4/21/2018 12:19 | 0.6  | 0.8  | 12.1 | 43.3 | 24.6 | 22.5 | 1.2652 | 2.6 |
| 4/21/2018 12:20 | 0.5  | 0.9  | 12.4 | 42.5 | 24.5 | 22.2 | 1.2815 | 2.6 |

|                 |     |     |      |      |      |      |        |     |
|-----------------|-----|-----|------|------|------|------|--------|-----|
| 4/21/2018 12:21 | 0.5 | 1.8 | 12.8 | 41.7 | 23.8 | 21.9 | 1.234  | 2.6 |
| 4/21/2018 12:22 | 0.4 | 0.9 | 12.4 | 40.8 | 23.4 | 21.7 | 1.2367 | 2.6 |
| 4/21/2018 12:23 | 0.5 | 0.9 | 12.2 | 39.6 | 23.4 | 21.4 | 1.2067 | 2.5 |
| 4/21/2018 12:24 | 0.5 | 1.3 | 11.1 | 39.4 | 23.3 | 21.1 | 1.2063 | 2.3 |
| 4/21/2018 12:25 | 0.6 | 1.4 | 10.9 | 38.7 | 22.2 | 20.9 | 1.1847 | 2.4 |
| 4/21/2018 12:26 | 0.6 | 1.4 | 11.1 | 38.3 | 21.9 | 20.6 | 1.1742 | 2.6 |
| 4/21/2018 12:27 | 0.6 | 1.1 | 10.1 | 38.4 | 21.8 | 20.3 | 1.1731 | 2.6 |
| 4/21/2018 12:28 | 0.6 | 1   | 11.9 | 38.5 | 22   | 20.1 | 1.189  | 2.7 |
| 4/21/2018 12:29 | 0.6 | 1.2 | 12.2 | 37.8 | 21.4 | 19.8 | 1.1714 | 2.6 |
| 4/21/2018 12:30 | 0.5 | 1.7 | 10.7 | 37.3 | 21.2 | 19.7 | 1.157  | 2.6 |
| 4/21/2018 12:31 | 0.4 | 1.3 | 10.1 | 36.8 | 21.2 | 19.5 | 1.1553 | 2.6 |
| 4/21/2018 12:32 | 0.4 | 1.1 | 10.4 | 36.4 | 20.9 | 19.2 | 1.1567 | 2.6 |
| 4/21/2018 12:33 | 0.5 | 0.6 | 11.8 | 35.6 | 20.5 | 19.1 | 1.1275 | 2.6 |
| 4/21/2018 12:34 | 0.5 | 1.1 | 10   | 34.7 | 19.9 | 18.9 | 1.1047 | 2.6 |
| 4/21/2018 12:35 | 0.5 | 1.3 | 10.8 | 35.4 | 20   | 18.7 | 1.1133 | 2.6 |
| 4/21/2018 12:36 | 0.5 | 0.6 | 11.1 | 34.4 | 19.8 | 18.4 | 1.1142 | 2.6 |
| 4/21/2018 12:37 | 0.6 | 1.5 | 10.2 | 33.2 | 18.8 | 18.2 | 1.0475 | 2.7 |
| 4/21/2018 12:38 | 0.7 | 1.5 | 9.3  | 32.5 | 18.9 | 17.9 | 1.0458 | 2.7 |
| 4/21/2018 12:39 | 0.9 | 1.8 | 7.7  | 30.2 | 17.2 | 17.3 | 0.9651 | 2.6 |
| 4/21/2018 12:40 | 1.1 | 2.2 | 9.7  | 30.2 | 16.4 | 16.8 | 0.9273 | 2.6 |
| 4/21/2018 12:41 | 1.3 | 1.4 | 9.8  | 29.7 | 16.3 | 16.3 | 0.9263 | 2.6 |
| 4/21/2018 12:42 | 1.4 | 2.2 | 8.8  | 28.9 | 15.5 | 15.7 | 0.8697 | 2.7 |
| 4/21/2018 12:43 | 1.4 | 2.1 | 8.9  | 29.9 | 15.3 | 15   | 0.8889 | 2.7 |
| 4/21/2018 12:44 | 1.5 | 1.6 | 9.4  | 29.6 | 15.5 | 14.5 | 0.8836 | 2.7 |
| 4/21/2018 12:45 | 1.3 | 1.1 | 8.6  | 29.8 | 16   | 14   | 0.9246 | 2.8 |
| 4/21/2018 12:46 | 1.1 | 1.8 | 9.4  | 30.1 | 16.2 | 13.6 | 0.9344 | 2.8 |
| 4/21/2018 12:47 | 1   | 1.4 | 9    | 29.7 | 16.5 | 13.4 | 0.9517 | 2.4 |
| 4/21/2018 12:48 | 0.9 | 1   | 10.2 | 30.6 | 16.4 | 13.3 | 0.9527 | 2.6 |
| 4/21/2018 12:49 | 0.8 | 1.3 | 9.4  | 30.4 | 17   | 13.3 | 0.9749 | 2.8 |
| 4/21/2018 12:50 | 0.7 | 1.7 | 9.9  | 30.6 | 16.9 | 13.5 | 0.985  | 2.9 |
| 4/21/2018 12:51 | 0.5 | 0.7 | 9.2  | 30.4 | 17.2 | 13.7 | 0.9924 | 2.8 |
| 4/21/2018 12:52 | 0.4 | 0.7 | 7.9  | 30.6 | 16.9 | 13.9 | 0.9987 | 2.8 |
| 4/21/2018 12:53 | 0.3 | 0.8 | 9.7  | 30.7 | 17.1 | 14   | 0.9942 | 3   |
| 4/21/2018 12:54 | 0.3 | 1.1 | 9.6  | 30   | 16.7 | 14.1 | 0.988  | 2.9 |
| 4/21/2018 12:55 | 0.3 | 0.7 | 8    | 29.9 | 16.5 | 14.2 | 0.9693 | 2.7 |
| 4/21/2018 12:56 | 0.3 | 0.5 | 9.2  | 29.8 | 16.4 | 14.2 | 0.9721 | 2.7 |
| 4/21/2018 12:57 | 0.3 | 0.6 | 8    | 29.3 | 16.2 | 14.1 | 0.9684 | 2.7 |
| 4/21/2018 12:58 | 0.3 | 0.8 | 8.5  | 29.2 | 16   | 14.1 | 0.9472 | 2.4 |
| 4/21/2018 12:59 | 0.3 | 1.1 | 8.4  | 28.8 | 15.7 | 13.9 | 0.9415 | 2.4 |
| 4/21/2018 13:00 | 0.4 | 1.3 | 8    | 29.2 | 15.5 | 13.8 | 0.9327 | 2.3 |
| 4/21/2018 13:01 | 0.4 | 0.9 | 7.6  | 28.4 | 15.4 | 13.6 | 0.9347 | 2.4 |
| 4/21/2018 13:02 | 0.5 | 1.3 | 7.1  | 27.2 | 14.7 | 13.4 | 0.8716 | 2.5 |
| 4/21/2018 13:03 | 0.7 | 2   | 7.6  | 26.6 | 13.9 | 13   | 0.8355 | 2.1 |
| 4/21/2018 13:04 | 1.1 | 1.9 | 6.7  | 25.4 | 12.6 | 12.4 | 0.7117 | 1.7 |
| 4/21/2018 13:05 | 1.3 | 1.6 | 7.3  | 25.3 | 13   | 12   | 0.7512 | 1.6 |
| 4/21/2018 13:06 | 1.6 | 2.7 | 6.9  | 24.2 | 12.1 | 11.4 | 0.6622 | 1.6 |
| 4/21/2018 13:07 | 1.8 | 2.6 | 4.8  | 24.8 | 11.9 | 10.8 | 0.6557 | 1.6 |

|                 |      |      |      |      |      |      |        |     |
|-----------------|------|------|------|------|------|------|--------|-----|
| 4/21/2018 13:08 | 2    | 3.3  | 7.8  | 24.2 | 11.7 | 10.3 | 0.657  | 1.6 |
| 4/21/2018 13:09 | 2.8  | 6.3  | 6.7  | 26.6 | 10.9 | 9.5  | 0.5666 | 1.6 |
| 4/21/2018 13:10 | 3.9  | 6.9  | 7.3  | 27.2 | 11.5 | 8.8  | 0.5718 | 1.6 |
| 4/21/2018 13:11 | 5.2  | 7.9  | 8.6  | 26.9 | 10.6 | 8    | 0.4924 | 1.6 |
| 4/21/2018 13:12 | 5.9  | 7.2  | 8.4  | 27   | 10.4 | 7.5  | 0.4815 | 1.6 |
| 4/21/2018 13:13 | 6    | 7.1  | 8    | 26.6 | 10.8 | 7    | 0.5081 | 1.6 |
| 4/21/2018 13:14 | 6    | 8.2  | 8.2  | 26.7 | 10.3 | 6.3  | 0.457  | 1.6 |
| 4/21/2018 13:15 | 6.2  | 8.3  | 7.3  | 26.7 | 9.9  | 5.9  | 0.4313 | 1.6 |
| 4/21/2018 13:16 | 6.6  | 7.9  | 9    | 26.4 | 10   | 5.3  | 0.4197 | 1.6 |
| 4/21/2018 13:17 | 7.1  | 9    | 8.7  | 27.1 | 9.2  | 4.8  | 0.3881 | 1.5 |
| 4/21/2018 13:18 | 7.4  | 9.2  | 7.8  | 26.8 | 9.1  | 4.3  | 0.377  | 1.5 |
| 4/21/2018 13:19 | 7.7  | 9.9  | 8.5  | 27   | 8.6  | 4    | 0.3572 | 1.5 |
| 4/21/2018 13:20 | 8.2  | 10.8 | 9.4  | 27.6 | 8    | 3.7  | 0.3147 | 1.5 |
| 4/21/2018 13:21 | 9    | 11.9 |      | 28.3 | 7.4  | 3.3  | 0.3055 | 1.5 |
| 4/21/2018 13:22 | 9.7  | 11.9 |      | 28.1 | 7.3  | 3.1  | 0.2935 | 1.5 |
| 4/21/2018 13:23 | 10.1 | 11.5 |      | 28.3 | 7.2  | 2.8  | 0.2907 | 1.5 |
| 4/21/2018 13:24 | 10.2 | 12   | 9.4  | 28.3 | 7.2  | 2.6  | 0.282  | 1.5 |
| 4/21/2018 13:25 | 10.2 | 12   |      | 28.7 | 7.2  | 2.4  | 0.2648 | 1.5 |
| 4/21/2018 13:26 | 10.8 | 13.3 | 8.8  | 29   | 6.2  | 2.3  | 0.2489 | 1.5 |
| 4/21/2018 13:27 | 10.8 | 11.4 | 8.9  | 28.2 | 6.2  | 2.2  | 0.2672 | 1.5 |
| 4/21/2018 13:28 | 11   | 13   | 15.9 | 29.7 | 5.9  | 2.1  | 0.2576 | 1.5 |
| 4/21/2018 13:29 | 11.2 | 13   |      | 29.5 | 5.5  | 2    | 0.2277 | 1.5 |
| 4/21/2018 13:30 | 11.7 | 12.9 | 10.1 | 29.2 | 5.6  | 2    | 0.2435 | 1.5 |
| 4/21/2018 13:31 | 11.8 | 13.4 |      | 29.1 | 5.4  | 1.9  | 0.226  | 1.6 |
| 4/21/2018 13:32 | 11.9 | 14.1 | 10.4 | 29.6 | 5.2  | 1.9  | 0.2339 | 1.6 |
| 4/21/2018 13:33 | 12.3 | 14.7 | 9.9  | 30.1 | 4.8  | 1.9  | 0.208  | 1.6 |
| 4/21/2018 13:34 | 12.6 | 13.6 | 10.1 | 29.5 | 4.8  | 1.8  | 0.2096 | 1.5 |
| 4/21/2018 13:35 | 12.5 | 12.8 | 11.1 | 29.3 | 4.8  | 1.8  | 0.2209 | 1.5 |
| 4/21/2018 13:36 | 12.5 | 14.4 | 10.9 | 30.3 | 4.5  | 1.8  | 0.1933 | 1.5 |
| 4/21/2018 13:37 | 12.8 | 15.2 | 10.7 | 30.6 | 4.4  | 1.7  | 0.1965 | 1.5 |
| 4/21/2018 13:38 | 13.5 | 15.6 | 10.3 | 30.9 | 4.2  | 1.7  | 0.1796 | 1.5 |
| 4/21/2018 13:39 | 13.9 | 16.5 | 10.4 | 31.3 | 4.1  | 1.6  | 0.1928 | 1.5 |
| 4/21/2018 13:40 | 14.1 | 15.3 | 10.7 | 30.8 | 4.1  | 1.6  | 0.17   | 1.5 |
| 4/21/2018 13:41 | 14.2 | 15.2 | 9.7  | 30.8 | 4    | 1.6  | 0.1843 | 1.5 |
| 4/21/2018 13:42 | 14.5 | 15.9 | 11.3 | 31.8 | 3.8  | 1.5  | 0.1743 | 1.6 |
| 4/21/2018 13:43 | 14.7 | 15.6 | 10.5 | 31.5 | 3.8  | 1.5  | 0.1767 | 1.7 |
| 4/21/2018 13:44 | 14.9 | 16.1 | 10.4 | 31.5 | 3.7  | 1.5  | 0.1694 | 1.6 |
| 4/21/2018 13:45 | 14.9 | 15.7 | 10.3 | 31.5 | 3.7  | 1.5  | 0.168  | 1.5 |
| 4/21/2018 13:46 | 15   | 16.3 | 12.1 | 31.7 | 3.7  | 1.4  | 0.1759 | 1.5 |
| 4/21/2018 13:47 | 15.1 | 15.7 | 9.8  | 31.9 | 3.6  | 1.4  | 0.1558 | 1.5 |
| 4/21/2018 13:48 | 15.2 | 15.9 | 10.5 | 31.8 | 3.6  | 1.4  | 0.166  | 1.5 |
| 4/21/2018 13:49 | 15   | 15.4 | 10.6 | 31.5 | 3.6  | 1.4  | 0.1572 | 1.5 |
| 4/21/2018 13:50 | 14.7 | 15.6 | 10.6 | 31.7 | 3.6  | 1.4  | 0.169  | 1.5 |
| 4/21/2018 13:51 | 14.7 | 16.3 | 10.2 | 32.1 | 3.5  | 1.4  | 0.1583 | 1.6 |
| 4/21/2018 13:52 | 15.1 | 16.1 | 11.7 | 32.4 | 3.4  | 1.4  | 0.1569 | 1.6 |
| 4/21/2018 13:53 | 15.4 | 16.5 | 9.6  | 32.3 | 3.4  | 1.4  | 0.1597 | 1.6 |
| 4/21/2018 13:54 | 15.5 | 16.5 | 11.3 | 31.5 | 3.4  | 1.4  | 0.1525 | 1.6 |

|                 |      |      |      |      |      |      |        |     |
|-----------------|------|------|------|------|------|------|--------|-----|
| 4/21/2018 13:55 | 15.5 | 17.5 | 10.1 | 32.9 | 3.3  | 1.4  | 0.1576 | 1.7 |
| 4/21/2018 13:56 | 16.1 | 19.7 | 12.2 | 34   | 3.2  | 1.4  | 0.143  | 1.6 |
| 4/21/2018 13:57 | 17.2 | 20   | 13.6 | 34.4 | 3.2  | 1.4  | 0.1553 | 1.6 |
| 4/21/2018 13:58 | 18.2 | 20.6 | 13.2 | 34.6 | 3.2  | 1.4  | 0.1453 | 1.6 |
| 4/21/2018 13:59 | 18.6 | 19.8 | 12.5 | 35.1 | 3.2  | 1.3  | 0.1545 | 1.6 |
| 4/21/2018 14:00 | 18.3 | 18.3 | 12.2 | 33.1 | 3.3  | 1.3  | 0.1538 | 1.6 |
| 4/21/2018 14:01 | 18   | 19.5 | 11.3 | 34.4 | 3.2  | 1.3  | 0.1477 | 1.5 |
| 4/21/2018 14:02 | 17.9 | 19.7 | 12   | 34.2 | 3.1  | 1.3  | 0.1514 | 1.5 |
| 4/21/2018 14:03 | 17.8 | 19.1 | 11.8 | 34.2 | 3.2  | 1.3  | 0.1331 | 1.5 |
| 4/21/2018 14:04 | 18.3 | 20.5 | 12.1 | 35.1 | 3.1  | 1.3  | 0.1472 | 1.6 |
| 4/21/2018 14:05 | 18.4 | 20.3 | 12   | 35.6 | 3.1  | 1.3  | 0.1384 | 1.6 |
| 4/21/2018 14:06 | 19   | 20.4 | 12   | 35.3 | 3.2  | 1.3  | 0.1465 | 1.5 |
| 4/21/2018 14:07 | 19.2 | 20.1 | 12.1 | 35.5 | 3.1  | 1.3  | 0.1386 | 1.5 |
| 4/21/2018 14:08 | 18.6 | 17.1 | 11.4 | 33   | 3.2  | 1.3  | 0.1473 | 1.5 |
| 4/21/2018 14:09 | 17.7 | 16.5 | 10.2 | 32.4 | 3.2  | 1.3  | 0.1457 | 1.5 |
| 4/21/2018 14:10 | 16.5 | 16   | 11.6 | 32.1 | 3.2  | 1.3  | 0.1444 | 1.5 |
| 4/21/2018 14:11 | 15.7 | 15.1 | 10.6 | 31.4 | 3.2  | 1.4  | 0.1505 | 1.4 |
| 4/21/2018 14:12 | 15.2 | 15.9 | 9.5  | 31.6 | 3.2  | 1.4  | 0.1383 | 1.5 |
| 4/21/2018 14:13 | 14.8 | 15.5 | 10.6 | 31   | 3.2  | 1.5  | 0.1518 | 1.5 |
| 4/21/2018 14:14 | 14.5 | 15   | 10   | 30.9 | 3.2  | 1.5  | 0.1378 | 1.5 |
| 4/21/2018 14:15 | 13.8 | 12.5 | 9.4  | 29   | 4.6  | 1.9  | 0.1623 | 1.5 |
| 4/21/2018 14:16 | 12.1 | 8.4  | 6.9  | 33.1 | 14.4 | 14.2 | 0.3205 | 1.5 |
| 4/21/2018 14:17 | 8.8  | 4    | 5    | 32.5 | 33.7 | 33.8 | 0.5662 | 1.6 |
| 4/21/2018 14:18 | 5    | 2    | 4.3  | 41.8 | 40   | 41.5 | 0.8948 | 1.6 |
| 4/21/2018 14:19 | 2.3  | 2.1  | 4.5  | 46.9 | 42.9 | 46.2 | 1.2918 | 1.7 |
| 4/21/2018 14:20 | 1.2  | 0.7  | 5.2  | 45.9 | 43.5 | 48.2 | 1.4691 | 1.7 |
| 4/21/2018 14:21 | 1    | 1.1  | 4.6  | 43.2 | 40.5 | 44.6 | 1.4103 | 1.7 |
| 4/21/2018 14:22 | 1.3  | 2.7  | 4.9  | 44.1 | 35.7 | 40.3 | 1.4726 | 1.7 |
| 4/21/2018 14:23 | 1.6  | 3    | 5.5  | 42.4 | 35   | 36.9 | 1.5433 | 1.7 |
| 4/21/2018 14:24 | 2.1  | 3.6  | 5.4  | 42.6 | 32.6 | 35   | 1.5722 | 1.7 |
| 4/21/2018 14:25 | 2.3  | 2.8  | 5.9  | 43.2 | 32.4 | 34.9 | 1.9015 | 1.7 |
| 4/21/2018 14:26 | 2.2  | 2.5  | 4.5  | 42.2 | 32.4 | 36.1 | 1.9492 | 1.7 |
| 4/21/2018 14:27 | 1.9  | 1.5  | 4.7  | 42.6 | 34.4 | 39.6 | 2.0537 | 1.7 |
| 4/21/2018 14:28 | 1.7  | 2.7  | 5.3  | 39.6 | 32.7 | 35.3 | 1.732  | 1.7 |
| 4/21/2018 14:29 | 1.6  | 2    | 5.3  | 40.1 | 33.1 | 34.8 | 1.8662 | 1.7 |
| 4/21/2018 14:30 | 1.6  | 1.6  | 3.9  | 38.6 | 32.7 | 36.7 | 1.8843 | 1.7 |
| 4/21/2018 14:31 | 1.6  | 2.2  | 4.8  | 39.2 | 32.7 | 36.6 | 1.8177 | 1.7 |
| 4/21/2018 14:32 | 1.4  | 1.1  | 4.6  | 40.9 | 34.9 | 36.7 | 2.0037 | 1.7 |
| 4/21/2018 14:33 | 1    | 0.3  | 4.6  | 40.3 | 36.7 | 37   | 2.0937 | 1.7 |
| 4/21/2018 14:34 | 0.5  | 0.4  | 2.5  | 40.5 | 36.4 | 37.3 | 2.0628 | 1.7 |
| 4/21/2018 14:35 | 0.3  | 0.8  | 4.5  | 39.7 | 36.3 | 37.6 | 2.0617 | 1.7 |
| 4/21/2018 14:36 | 0.3  | 1    | 3.9  | 38.8 | 35.8 | 37.8 | 2.0198 | 1.7 |
| 4/21/2018 14:37 | 0.3  | 1.2  | 4.3  | 37.5 | 34.6 | 37.9 | 1.932  | 1.7 |
| 4/21/2018 14:38 | 0.4  | 1    | 4.6  | 36.8 | 33.7 | 37.8 | 1.9033 | 1.7 |
| 4/21/2018 14:39 | 0.4  | 1.3  | 4    | 36.3 | 33.7 | 38   | 1.8937 | 1.7 |
| 4/21/2018 14:40 | 0.5  | 0.5  | 3.9  | 35.5 | 32.5 | 37.8 | 1.829  | 1.7 |
| 4/21/2018 14:41 | 0.5  | 0.5  | 4.4  | 34.8 | 32.1 | 37.2 | 1.7943 | 1.7 |

|                 |     |     |     |      |      |      |        |     |
|-----------------|-----|-----|-----|------|------|------|--------|-----|
| 4/21/2018 14:42 | 0.7 | 1.1 | 4.1 | 33.3 | 30.3 | 36.3 | 1.6825 | 1.7 |
| 4/21/2018 14:43 | 0.8 | 0.8 | 4.9 | 33.1 | 30.2 | 35.4 | 1.6912 | 1.7 |
| 4/21/2018 14:44 | 0.9 | 1.4 | 4.1 | 32.5 | 29.8 | 34.4 | 1.659  | 1.7 |
| 4/21/2018 14:45 | 0.9 | 1.3 | 4.9 | 32.5 | 29.1 | 33.4 | 1.6492 | 1.7 |
| 4/21/2018 14:46 | 0.8 | 0.6 | 3.2 | 31.5 | 29.1 | 32.7 | 1.6178 | 1.7 |
| 4/21/2018 14:47 | 1   | 1.4 | 2.9 | 29.4 | 26.7 | 31.6 | 1.4962 | 1.7 |
| 4/21/2018 14:48 | 1.2 | 1.5 | 4.4 | 29.3 | 25.3 | 30.4 | 1.423  | 1.7 |
| 4/21/2018 14:49 | 1.5 | 2.2 | 3.4 | 29.9 | 25.3 | 29.4 | 1.4387 | 1.6 |
| 4/21/2018 14:50 | 1.5 | 2   | 4.9 | 30   | 26.7 | 28.8 | 1.4927 | 1.6 |
| 4/21/2018 14:51 | 1.7 | 3   | 3.1 | 28   | 23.5 | 25.4 | 1.2867 | 1.6 |
| 4/21/2018 14:52 | 1.7 | 2.1 | 3.5 | 28.9 | 24   | 23.8 | 1.3743 | 1.7 |
| 4/21/2018 14:53 | 1.9 | 2.5 | 4.3 | 28.5 | 23.9 | 23.5 | 1.3433 | 1.7 |
| 4/21/2018 14:54 | 1.8 | 2.5 | 2.7 | 28.5 | 23.5 | 23.8 | 1.346  | 1.7 |
| 4/21/2018 14:55 | 1.7 | 2.1 | 4.3 | 28.2 | 23.8 | 23.2 | 1.3303 | 1.8 |
| 4/21/2018 14:56 | 1.5 | 2   | 3.9 | 28.9 | 24.9 | 23.4 | 1.424  | 1.8 |
| 4/21/2018 14:57 | 1.4 | 2.2 | 5.1 | 27.8 | 23.9 | 23.4 | 1.3393 | 1.8 |
| 4/21/2018 14:58 | 1.5 | 2   | 4.7 | 27.5 | 23   | 23.2 | 1.3125 | 1.9 |
| 4/21/2018 14:59 | 1.5 | 2   | 3   | 27.5 | 23.8 | 23.1 | 1.3518 | 1.9 |
| 4/21/2018 15:00 | 1.3 | 0.6 | 3.6 | 28   | 24.4 | 23.3 | 1.4008 | 1.8 |
| 4/21/2018 15:01 | 1   | 0.2 | 4.7 | 27.9 | 25.1 | 23.4 | 1.436  | 1.8 |
| 4/21/2018 15:02 | 0.7 | 0.8 | 2.6 | 27.9 | 25   | 23.5 | 1.4197 | 1.8 |
| 4/21/2018 15:03 | 0.6 | 1.3 | 3.1 | 27.4 | 25.1 | 23.7 | 1.441  | 1.8 |
| 4/21/2018 15:04 | 0.5 | 1   | 3.9 | 27.1 | 24.4 | 23.7 | 1.3942 | 1.7 |
| 4/21/2018 15:05 | 0.4 | 1.3 | 2.9 | 27.3 | 24.4 | 23.6 | 1.4225 | 1.7 |
| 4/21/2018 15:06 | 0.4 | 1.5 | 3.2 | 27   | 24   | 23.7 | 1.3743 | 1.7 |
| 4/21/2018 15:07 | 0.5 | 0.7 | 4.5 | 26.9 | 23.6 | 23.8 | 1.3753 | 1.7 |
| 4/21/2018 15:08 | 0.6 | 1.3 | 3.3 | 26.6 | 23.3 | 23.7 | 1.3462 | 1.7 |
| 4/21/2018 15:09 | 0.8 | 1.5 | 3.5 | 26   | 21.9 | 23.2 | 1.2428 | 1.8 |
| 4/21/2018 15:10 | 1   | 1.1 | 3.3 | 26.1 | 21.8 | 22.8 | 1.2527 | 1.8 |
| 4/21/2018 15:11 | 1.1 | 1.2 | 4.2 | 25.6 | 21.7 | 22.3 | 1.2268 | 1.8 |
| 4/21/2018 15:12 | 1.1 | 1.3 | 3.8 | 25.8 | 21.3 | 21.7 | 1.2455 | 1.7 |
| 4/21/2018 15:13 | 1   | 1.3 | 2.2 | 25.6 | 21.6 | 21.2 | 1.2395 | 1.8 |
| 4/21/2018 15:14 | 0.9 | 1   | 1.7 | 25.6 | 21.6 | 20.7 | 1.2597 | 1.9 |
| 4/21/2018 15:15 | 0.9 | 1.2 | 4.7 | 25.2 | 20.8 | 20.3 | 1.192  | 2   |
| 4/21/2018 15:16 | 1   | 1.8 | 3.8 | 24.7 | 20.2 | 19.7 | 1.1557 | 2.1 |
| 4/21/2018 15:17 | 1.3 | 2   | 4.6 | 24.6 | 18.8 | 19.1 | 1.084  | 2   |
| 4/21/2018 15:18 | 1.7 | 2.8 | 3.9 | 24.3 | 17.8 | 18.4 | 1.0244 | 2   |
| 4/21/2018 15:19 | 1.9 | 2.4 | 4.1 | 24.7 | 18.6 | 17.9 | 1.081  | 2.1 |
| 4/21/2018 15:20 | 2   | 2.7 | 5.2 | 24.5 | 18   | 17.4 | 1.0335 | 2.2 |
| 4/21/2018 15:21 | 2   | 2.3 | 4.7 | 24   | 17.2 | 16.8 | 1.0004 | 2.2 |
| 4/21/2018 15:22 | 1.9 | 2.6 | 3.9 | 24   | 18.1 | 16.3 | 1.0492 | 2.2 |
| 4/21/2018 15:23 | 1.9 | 2.3 | 4.2 | 24   | 18   | 15.8 | 1.0487 | 2.2 |
| 4/21/2018 15:24 | 1.7 | 1.8 | 3.4 | 24.5 | 17.9 | 15.4 | 1.0358 | 2   |
| 4/21/2018 15:25 | 1.5 | 1.6 | 3.5 | 24.1 | 18.4 | 15.2 | 1.0727 | 1.8 |
| 4/21/2018 15:26 | 1.4 | 1.2 | 3.9 | 24   | 18.3 | 15.2 | 1.067  | 1.9 |
| 4/21/2018 15:27 | 1.3 | 1.7 | 4   | 23.8 | 18.3 | 15.1 | 1.0553 | 2.1 |
| 4/21/2018 15:28 | 1.4 | 2.4 | 4.7 | 23.5 | 17.9 | 15   | 1.0335 | 2.2 |

|                 |      |      |      |      |      |      |        |     |
|-----------------|------|------|------|------|------|------|--------|-----|
| 4/21/2018 15:29 | 1.3  | 0.9  | 2.7  | 23.9 | 17.9 | 15   | 1.0588 | 2.3 |
| 4/21/2018 15:30 | 1.1  | 0.7  | 3.8  | 23.9 | 18.9 | 15.1 | 1.1083 | 2.3 |
| 4/21/2018 15:31 | 0.8  | 0.8  | 5    | 23.7 | 18.8 | 15.1 | 1.0862 | 2.3 |
| 4/21/2018 15:32 | 0.6  | 0.5  | 4    | 23.5 | 18.7 | 15.2 | 1.0927 | 2.3 |
| 4/21/2018 15:33 | 0.6  | 1.5  | 4.1  | 23.5 | 18.4 | 15.1 | 1.0747 | 2.2 |
| 4/21/2018 15:34 | 0.8  | 1.5  | 4.4  | 23.3 | 17.6 | 14.9 | 1.0271 | 2.1 |
| 4/21/2018 15:35 | 0.8  | 1.9  | 3.5  | 23.4 | 17.7 | 14.9 | 1.0312 | 2.2 |
| 4/21/2018 15:36 | 1    | 1.6  | 4.2  | 23.3 | 16.8 | 14.7 | 0.9633 | 2.3 |
| 4/21/2018 15:37 | 1.2  | 2    | 4.7  | 23.1 | 16.5 | 14.5 | 0.9489 | 2.3 |
| 4/21/2018 15:38 | 1.8  | 3.6  | 4.8  | 24.4 | 14.9 | 14.1 | 0.845  | 2.3 |
| 4/21/2018 15:39 | 3.9  | 10   | 7.5  | 27.5 | 11.6 | 13.2 | 0.6311 | 2.3 |
| 4/21/2018 15:40 | 6.6  | 10.9 | 6.7  | 28.4 | 10.5 | 12.1 | 0.5687 | 2.3 |
| 4/21/2018 15:41 | 9    | 10.9 | 8.5  | 28.5 | 10.5 | 11   | 0.5481 | 2.3 |
| 4/21/2018 15:42 | 10.2 | 11.8 | 8.7  | 28.5 | 9.6  | 10   | 0.4835 | 2.4 |
| 4/21/2018 15:43 | 10.7 | 12   | 7.8  | 29.4 | 9.5  | 8.8  | 0.4662 | 2.3 |
| 4/21/2018 15:44 | 11.4 | 13   | 8.8  | 29.3 | 9.1  | 7.6  | 0.4386 | 2.3 |
| 4/21/2018 15:45 | 12.2 | 14   | 10   | 31.1 | 8.5  | 6.4  | 0.3901 | 2.3 |
| 4/21/2018 15:46 | 13   | 14.7 | 10.5 | 31.2 | 7.9  | 5.3  | 0.3857 | 2.2 |
| 4/21/2018 15:47 | 13.9 | 14.5 | 9.7  | 31.5 | 7.4  | 4.3  | 0.332  | 2.2 |
| 4/21/2018 15:48 | 14.3 | 15.6 | 9.4  | 31.5 | 7.1  | 3.8  | 0.3395 | 2.3 |
| 4/21/2018 15:49 | 14.6 | 15.6 | 9.8  | 31.5 | 7    | 3.3  | 0.3197 | 2.3 |
| 4/21/2018 15:50 | 14.9 | 16.6 | 9.9  | 32.7 | 6.6  | 2.9  | 0.3158 | 2.4 |
| 4/21/2018 15:51 | 15.4 | 16.5 | 9.7  | 32.8 | 6.3  | 2.6  | 0.296  | 2.3 |
| 4/21/2018 15:52 | 16   | 17.4 | 10.5 | 33.1 | 5.8  | 2.3  | 0.2669 | 2.2 |
| 4/21/2018 15:53 | 16.5 | 17.7 | 10.3 | 33.7 | 5.7  | 2.1  | 0.2662 | 1.7 |
| 4/21/2018 15:54 | 17.5 | 19.6 | 13.1 | 35.1 | 5.4  | 2    | 0.2451 | 1.6 |
| 4/21/2018 15:55 | 18   | 18.6 | 11.8 | 34.4 | 5.1  | 1.9  | 0.2644 | 1.7 |
| 4/21/2018 15:56 | 18.3 | 18.8 | 10.9 | 34.1 | 4.8  | 1.8  | 0.229  | 1.7 |
| 4/21/2018 15:57 | 18.1 | 19.1 | 11   | 34.7 | 4.7  | 1.7  | 0.2417 | 1.7 |
| 4/21/2018 15:58 | 18.2 | 19.1 | 12.3 | 34.7 | 4.7  | 1.6  | 0.2305 | 1.7 |
| 4/21/2018 15:59 | 18   | 18   | 11.2 | 33.9 | 4.8  | 1.6  | 0.2417 | 1.7 |
| 4/21/2018 16:00 | 18.2 | 19.1 | 12.8 | 34.5 | 4.3  | 1.6  | 0.2011 | 1.7 |
| 4/21/2018 16:01 | 18.3 | 19   | 12.4 | 35.2 | 4.3  | 1.5  | 0.2242 | 1.7 |
| 4/21/2018 16:02 | 19   | 20.3 | 11.8 | 35.9 | 4    | 1.5  | 0.1963 | 1.8 |
| 4/21/2018 16:03 | 19.3 | 20.3 | 11.9 | 35.4 | 3.9  | 1.5  | 0.185  | 1.8 |
| 4/21/2018 16:04 | 19.2 | 18.2 | 11   | 34   | 4    | 1.5  | 0.2114 | 1.7 |
| 4/21/2018 16:05 | 18.3 | 16.9 | 11.3 | 33.2 | 4.2  | 1.5  | 0.2065 | 1.8 |
| 4/21/2018 16:06 | 17.3 | 15.9 | 11.1 | 32.1 | 4.3  | 1.5  | 0.2167 | 1.9 |
| 4/21/2018 16:07 | 16.2 | 15.8 | 10.5 | 31.6 | 4.4  | 1.5  | 0.2084 | 1.8 |
| 4/21/2018 16:08 | 15.5 | 15.5 | 11.3 | 31.8 | 4.4  | 1.5  | 0.2263 | 1.8 |
| 4/21/2018 16:09 | 14.9 | 14.4 | 8.5  | 31.3 | 4.4  | 1.6  | 0.2213 | 1.9 |
| 4/21/2018 16:10 | 14.5 | 13.6 | 9.1  | 29.9 | 6.3  | 2.7  | 0.2326 | 2   |
| 4/21/2018 16:11 | 11.9 | 5.5  | 4.1  | 27   | 37.8 | 35.5 | 0.4587 | 2.1 |
| 4/21/2018 16:12 | 7.5  | 2.1  | 4.9  | 42.1 | 49.2 | 79.8 | 1.0675 | 2.2 |
| 4/21/2018 16:13 | 3.3  | 1.6  | 5.4  | 58.6 | 49.2 | 85.2 | 1.3873 | 2.4 |
| 4/21/2018 16:14 | 1.1  | 1.6  | 6.5  | 81.2 | 54   | 99.7 | 1.8462 | 2.6 |
| 4/21/2018 16:15 | 0.8  | 0.9  |      | 91.9 | 53.7 | 97.9 | 2.3527 | 2.7 |

|                 |     |     |      |       |      |       |        |     |
|-----------------|-----|-----|------|-------|------|-------|--------|-----|
| 4/21/2018 16:16 | 0.7 | 0.8 |      | 96.1  | 55.1 | 104   | 2.5805 | 2.7 |
| 4/21/2018 16:17 | 0.5 | 0.8 |      | 101.3 | 55.8 | 104.5 | 2.9293 | 2.9 |
| 4/21/2018 16:18 | 0.5 | 1.1 | 7.8  | 99.1  | 52.5 | 97    | 2.9113 | 2.8 |
| 4/21/2018 16:19 | 0.4 | 0.4 | 10.3 | 98.1  | 52   | 97.3  | 3.0443 | 2.8 |
| 4/21/2018 16:20 | 0.5 | 0.6 |      | 91.5  | 48.2 | 91.1  | 2.884  | 2.8 |
| 4/21/2018 16:21 | 0.5 | 0.2 |      | 92.5  | 47.6 | 93.2  | 2.994  | 2.9 |
| 4/21/2018 16:22 | 0.5 | 0.5 | 14.7 | 85.1  | 47.5 | 91.9  | 3.2147 | 2.9 |
| 4/21/2018 16:23 | 0.5 | 0.2 |      | 85.9  | 45.7 | 90.1  | 3.1807 | 2.9 |
| 4/21/2018 16:24 | 0.5 | 1.4 | 5.6  | 81.4  | 44.8 | 85.6  | 3.2073 | 2.9 |
| 4/21/2018 16:25 | 0.5 | 0.9 | 7    | 82.5  | 45   | 88.2  | 3.318  | 2.9 |
| 4/21/2018 16:26 | 0.5 | 0.8 | 6.4  | 83.8  | 45.9 | 93.1  | 3.5028 | 2.9 |
| 4/21/2018 16:27 | 0.5 | 1.5 | 12.3 | 78.2  | 45.6 | 87.6  | 3.3389 | 2.6 |
| 4/21/2018 16:28 | 0.4 | 0.8 | 6.2  | 78.2  | 45.6 | 85.5  | 3.4208 | 2.5 |
| 4/21/2018 16:29 | 0.4 | 0.8 | 5.1  | 73.8  | 44.4 | 82.7  | 3.3228 | 2.5 |
| 4/21/2018 16:30 | 0.4 | 0.3 | 7.6  | 72.9  | 42.4 | 84.1  | 3.3628 | 2.6 |
| 4/21/2018 16:31 | 0.5 | 0.4 | 6.3  | 70.3  | 40.6 | 81.4  | 3.2603 | 2.5 |
| 4/21/2018 16:32 | 0.5 | 0.4 | 5.6  | 70.7  | 41.2 | 82.3  | 3.3356 | 2.5 |
| 4/21/2018 16:33 | 0.5 | 0.9 | 4.9  | 66.4  | 38.8 | 72.7  | 3.1132 | 2.5 |
| 4/21/2018 16:34 | 0.5 | 0.8 | 4.9  | 65.5  | 39.4 | 77.2  | 3.2183 | 2.5 |
| 4/21/2018 16:35 | 0.5 | 1.4 | 6.4  | 60.6  | 37.6 | 73.6  | 3.0273 | 2.6 |
| 4/21/2018 16:36 | 0.5 | 0.8 | 6.5  | 64.1  | 37.8 | 75.1  | 3.1247 | 2.6 |
| 4/21/2018 16:37 | 0.5 | 1   | 7    | 63.4  | 37.4 | 73.5  | 3.1101 | 2.7 |
| 4/21/2018 16:38 | 0.4 | 0.3 | 6.9  | 61.1  | 37.9 | 76.3  | 3.1607 | 2.6 |
| 4/21/2018 16:39 | 0.4 | 0.8 | 5.5  | 60.1  | 36.3 | 74.6  | 3.0248 | 2.7 |
| 4/21/2018 16:40 | 0.3 | 0.1 | 7    | 60.1  | 37   | 74.7  | 3.1136 | 2.6 |
| 4/21/2018 16:41 | 0.4 | 0.7 | 5.3  | 56.2  | 35.1 | 74.2  | 2.9398 | 2.7 |
| 4/21/2018 16:42 | 0.4 | 0.9 | 5.8  | 53.7  | 34.5 | 73.8  | 2.8913 | 2.7 |
| 4/21/2018 16:43 | 0.4 | 0   | 5.6  | 56.5  | 34.2 | 72.9  | 2.9033 | 2.6 |
| 4/21/2018 16:44 | 0.4 | 1.1 | 6.4  | 55.2  | 34.8 | 72.5  | 2.9263 | 2.6 |
| 4/21/2018 16:45 | 0.5 | 0.9 | 5    | 52.2  | 33.7 | 71.6  | 2.8378 | 2.8 |
| 4/21/2018 16:46 | 0.5 | 0.9 | 6.8  | 53.2  | 33.5 | 70.7  | 2.837  | 2.8 |
| 4/21/2018 16:47 | 0.5 | 0.1 | 5.2  | 50.1  | 32.8 | 69.7  | 2.7597 | 2.7 |
| 4/21/2018 16:48 | 0.5 | 0.9 | 6    | 53.5  | 33   | 68.7  | 2.8573 | 2.7 |
| 4/21/2018 16:49 | 0.5 | 0.5 | 5    | 47.2  | 31.8 | 63.6  | 2.6723 | 2.7 |
| 4/21/2018 16:50 | 0.5 | 0.3 | 5.9  | 47.6  | 31.2 | 62.3  | 2.6672 | 2.6 |
| 4/21/2018 16:51 | 0.6 | 1.5 | 4.6  | 45.3  | 29.5 | 56.5  | 2.4806 | 2.4 |
| 4/21/2018 16:52 | 0.6 | 1.2 | 4.5  | 47    | 30.2 | 60    | 2.5868 | 2.2 |
| 4/21/2018 16:53 | 0.6 | 0.2 | 5.4  | 43    | 29.3 | 57.6  | 2.4775 | 2.3 |
| 4/21/2018 16:54 | 0.6 | 0.6 | 4.6  | 41.2  | 28.1 | 55.9  | 2.4166 | 2.4 |
| 4/21/2018 16:55 | 0.7 | 1.3 | 4.2  | 39    | 26.5 | 49.3  | 2.1949 | 2.5 |
| 4/21/2018 16:56 | 0.8 | 1.3 | 6.1  | 39.1  | 26   | 46.5  | 2.1913 | 2.6 |
| 4/21/2018 16:57 | 0.8 | 1.5 | 6.5  | 39.9  | 26.3 | 47    | 2.2568 | 2.6 |
| 4/21/2018 16:58 | 0.8 | 1.4 | 5.2  | 40.5  | 26.9 | 47.7  | 2.3173 | 2.7 |
| 4/21/2018 16:59 | 0.7 | 0.3 | 4.6  | 39.1  | 26.4 | 48.2  | 2.2808 | 2.8 |
| 4/21/2018 17:00 | 0.6 | 1.6 | 5    | 39.6  | 26.1 | 48.7  | 2.2773 | 2.9 |
| 4/21/2018 17:01 | 0.6 | 1.7 | 4.2  | 40.7  | 26.9 | 49.3  | 2.3659 | 2.9 |
| 4/21/2018 17:02 | 0.5 | 0.7 | 3.6  | 41.3  | 27.3 | 50.3  | 2.3963 | 2.5 |

|                 |      |      |      |      |      |      |        |     |
|-----------------|------|------|------|------|------|------|--------|-----|
| 4/21/2018 17:03 | 0.4  | 0.7  | 4.8  | 42.4 | 27.8 | 51.5 | 2.4926 | 2.1 |
| 4/21/2018 17:04 | 0.3  | 0.1  | 5.7  | 41.8 | 27.7 | 52.4 | 2.4588 | 2   |
| 4/21/2018 17:05 | 0.3  | 0.8  | 4    | 41.4 | 27.3 | 53.5 | 2.4581 | 2   |
| 4/21/2018 17:06 | 0.2  | 0.6  | 4.3  | 40.5 | 27   | 53.9 | 2.4223 | 1.9 |
| 4/21/2018 17:07 | 0.2  | 0.5  | 4.8  | 40.1 | 26.5 | 54.2 | 2.3828 | 1.9 |
| 4/21/2018 17:08 | 0.3  | 1.1  | 4.3  | 40.1 | 26.3 | 54.5 | 2.3813 | 1.9 |
| 4/21/2018 17:09 | 0.2  | 0.6  | 4.7  | 39.7 | 26.3 | 54.6 | 2.3855 | 1.9 |
| 4/21/2018 17:10 | 0.2  | 0.7  | 4.8  | 39   | 26   | 54.5 | 2.3796 | 1.9 |
| 4/21/2018 17:11 | 0.1  | 1.5  | 4.7  | 38.1 | 25.4 | 54   | 2.2978 | 2   |
| 4/21/2018 17:12 | 0.2  | 1.1  | 5.5  | 37.4 | 24.9 | 53.1 | 2.2578 | 2   |
| 4/21/2018 17:13 | 0.3  | 0.8  | 4.1  | 35.7 | 24.3 | 52   | 2.1826 | 2   |
| 4/21/2018 17:14 | 0.4  | 0.6  | 4.6  | 36.4 | 24.1 | 50.9 | 2.1881 | 2   |
| 4/21/2018 17:15 | 0.4  | 0.8  | 5.3  | 36.4 | 23.9 | 50.2 | 2.1694 | 2   |
| 4/21/2018 17:16 | 0.4  | 1.4  | 6.1  | 34.6 | 23.5 | 49.2 | 2.1278 | 2.1 |
| 4/21/2018 17:17 | 0.4  | 1.7  | 3.3  | 34.7 | 23.1 | 48.1 | 2.0967 | 2.1 |
| 4/21/2018 17:18 | 0.4  | 0.2  | 3.6  | 34.8 | 23   | 47.3 | 2.0848 | 2.1 |
| 4/21/2018 17:19 | 0.4  | 0.9  | 4.4  | 32.8 | 22.1 | 46.1 | 1.9582 | 1.8 |
| 4/21/2018 17:20 | 0.5  | 1    | 4.4  | 31.1 | 21.4 | 44.8 | 1.8883 | 1.8 |
| 4/21/2018 17:21 | 0.7  | 1.7  | 4.1  | 30.6 | 19.8 | 35.8 | 1.7415 | 1.9 |
| 4/21/2018 17:22 | 0.8  | 1.3  | 4.4  | 30.5 | 20.7 | 37.2 | 1.8145 | 2   |
| 4/21/2018 17:23 | 0.9  | 1.9  | 4.6  | 29.8 | 19.3 | 32.2 | 1.6648 | 2.1 |
| 4/21/2018 17:24 | 0.9  | 1.5  | 4.5  | 29.7 | 19.9 | 35.8 | 1.7328 | 2.2 |
| 4/21/2018 17:25 | 1    | 2.2  | 3.8  | 28.5 | 18.9 | 35.6 | 1.6389 | 1.9 |
| 4/21/2018 17:26 | 0.9  | 1.7  | 4.2  | 30.5 | 19.3 | 35.2 | 1.7335 | 1.7 |
| 4/21/2018 17:27 | 0.8  | 1.6  | 4.1  | 32.3 | 20.7 | 35.5 | 1.8783 | 1.8 |
| 4/21/2018 17:28 | 0.6  | 0.5  | 5    | 29.8 | 20.3 | 35.4 | 0.6271 | 1.6 |
| 4/21/2018 17:29 | 0.5  | 0.8  | 4.9  | 30.4 | 20.2 | 35.4 | 0.0985 | 1.5 |
| 4/21/2018 17:30 | 0.6  | 0.9  | 4.1  | 29   | 20   | 35.1 | 0.1088 | 1.5 |
| 4/21/2018 17:31 | 0.6  | 1.6  | 3.8  | 29.6 | 19.5 | 34.8 | 0.0977 | 1.5 |
| 4/21/2018 17:32 | 0.8  | 1.3  | 3.9  | 27.3 | 18.6 | 34.3 | 0.1067 | 1.5 |
| 4/21/2018 17:33 | 1    | 2.2  | 3.7  | 23.4 | 16.6 | 21.2 | 0.096  | 1.5 |
| 4/21/2018 17:34 | 1.6  | 5    | 5.6  | 24.4 | 15.6 | 20.2 | 0.0991 | 1.5 |
| 4/21/2018 17:35 | 4    | 10.8 | 7.7  | 25.9 | 11.6 | 8.1  | 0.1024 | 1.5 |
| 4/21/2018 17:36 | 6.8  | 12.4 | 8.4  | 27.4 | 9.8  | 5.9  | 0.0955 | 1.5 |
| 4/21/2018 17:37 | 9.5  | 12.3 | 8    | 28   | 9.2  | 5.8  | 0.107  | 1.5 |
| 4/21/2018 17:38 | 10.6 | 13.7 | 9.4  | 28.8 | 8.8  | 5.6  | 0.0913 | 1.5 |
| 4/21/2018 17:39 | 11.5 | 14.3 | 8.2  | 29.9 | 7.7  | 5.3  | 0.1082 | 1.5 |
| 4/21/2018 17:40 | 12.7 | 16.8 | 11   | 31.3 | 7    | 5    | 0.0892 | 1.5 |
| 4/21/2018 17:41 | 14.1 | 18.6 | 11.7 | 32.8 | 6.2  | 4.6  | 0.101  | 1.5 |
| 4/21/2018 17:42 | 15.7 | 18.9 | 10.7 | 34.5 | 5.4  | 4.1  | 0.0995 | 1.5 |
| 4/21/2018 17:43 | 17.3 | 20.5 | 12   | 35.6 | 5.1  | 3.6  | 0.1027 | 1.5 |
| 4/21/2018 17:44 | 18.8 | 22   | 13.5 | 36.8 | 4.8  | 3.1  | 0.0989 | 1.5 |
| 4/21/2018 17:45 | 20.2 | 24.2 | 12.4 | 38.3 | 4.2  | 2.6  | 0.0957 | 1.5 |
| 4/21/2018 17:46 | 21.3 | 23.6 | 13.1 | 38.1 | 4.1  | 2.3  | 0.1059 | 1.5 |
| 4/21/2018 17:47 | 22   | 24.4 | 14.6 | 39.3 | 4    | 2    | 0.0765 | 1.5 |
| 4/21/2018 17:48 | 22.3 | 24.2 | 13.8 | 38.6 | 3.8  | 1.7  | 0.0921 | 1.5 |
| 4/21/2018 17:49 | 22.2 | 22.3 | 14.5 | 38.1 | 4.2  | 1.5  | 0.0845 | 1.5 |



|                 |      |      |      |      |      |       |        |     |
|-----------------|------|------|------|------|------|-------|--------|-----|
| 4/21/2018 17:50 | 22.3 | 24   | 14.1 | 38.9 | 4.2  | 1.4   | 0.0907 | 1.5 |
| 4/21/2018 17:51 | 22.8 | 25.4 | 14.3 | 39.7 | 3.9  | 1.3   | 0.0893 | 1.5 |
| 4/21/2018 17:52 | 23.4 | 25   | 13.9 | 39.8 | 3.8  | 1.3   | 0.0936 | 1.5 |
| 4/21/2018 17:53 | 24.1 | 26.3 | 15.8 | 40.4 | 3.5  | 1.2   | 0.099  | 1.5 |
| 4/21/2018 17:54 | 24.5 | 26.1 | 15   | 40.7 | 3.4  | 1.2   | 0.0877 | 1.5 |
| 4/21/2018 17:55 | 25   | 26.2 | 15   | 41.2 | 3.4  | 1.1   | 0.1019 | 1.5 |
| 4/21/2018 17:56 | 25.2 | 26   | 13.3 | 40.5 | 3.3  | 1.1   | 0.0818 | 1.5 |
| 4/21/2018 17:57 | 24   | 21.8 | 11.8 | 37.7 | 4.2  | 1.1   | 0.0896 | 1.5 |
| 4/21/2018 17:58 | 22.8 | 21.1 | 12.7 | 36.6 | 4.7  | 1.1   | 0.0919 | 1.5 |
| 4/21/2018 17:59 | 20.1 | 17.6 | 12.2 | 34.2 | 5.9  | 1.2   | 0.0915 | 1.5 |
| 4/21/2018 18:00 | 17.7 | 14.2 | 9.7  | 30.8 | 6.3  | 1.3   | 0.0952 | 1.5 |
| 4/21/2018 18:01 | 14.9 | 13.6 | 8.8  | 30.2 | 6.9  | 1.5   | 0.0877 | 1.5 |
| 4/21/2018 18:02 | 13.3 | 13.1 | 9.5  | 29.3 | 6.8  | 1.7   | 0.102  | 1.5 |
| 4/21/2018 18:03 | 12.3 | 12.4 | 10.2 | 28.1 | 5.9  | 1.8   | 0.1974 | 2.4 |
| 4/21/2018 18:04 | 11.8 | 11.4 | 7.8  | 27.9 | 1.6  | 1.8   | 0.3317 | 2.6 |
| 4/21/2018 18:05 | 11.2 | 11.2 | 8    | 28   | 0.3  | 1.7   | 0.3254 | 2.4 |
| 4/21/2018 18:06 | 10.8 | 10.8 | 6.7  | 27.5 | 0.2  | 1.5   | 0.3402 | 2.3 |
| 4/21/2018 18:07 | 10.5 | 11   | 6.9  | 27.5 | 0.3  | 1.3   | 0.3535 | 2.1 |
| 4/21/2018 18:08 | 10.7 | 11.3 | 7.2  | 27.8 | 0.3  | 1.1   | 0.3348 | 2.2 |
| 4/21/2018 18:09 | 11.2 | 13.9 | 8.6  | 29.1 | 0.2  | 0.8   | 0.3237 | 2.4 |
| 4/21/2018 18:10 | 11.7 | 11.9 | 8.3  | 29.3 | 0.2  | 0.5   | 0.3956 | 2.4 |
| 4/21/2018 18:11 | 11.4 | 9.8  | 6.8  | 29.1 | 0.2  | 0.2   | 0.5146 | 2.2 |
| 4/21/2018 18:12 | 10.1 | 8.6  | 6.9  | 27.8 | 0.2  | 0.1   | 0.5648 | 2   |
| 4/21/2018 18:13 | 8.5  | 7.5  | 7.6  | 26.6 | 0.2  | 0.1   | 0.5054 | 2   |
| 4/21/2018 18:14 | 7.6  | 7.7  | 6.6  | 25.7 | 0.2  | 0.1   | 0.488  | 1.9 |
| 4/21/2018 18:15 | 7.4  | 8.8  | 5.6  | 25.5 | 0.2  | 0.1   | 0.3764 | 1.8 |
| 4/21/2018 18:16 | 7    | 6.3  | 6.4  | 24.3 | 0    | 0     | 0.4447 | 1.8 |
| 4/21/2018 18:17 | 6.9  | 6.7  | 6.9  | 24.5 | 0.2  | 51    | 0.4016 | 1.7 |
| 4/21/2018 18:18 | 6.7  | 7.1  | 5.7  | 24.8 | 0.1  | 99.6  | 0.3909 | 1.7 |
| 4/21/2018 18:19 | 6.7  | 5.7  | 6.1  | 23.8 | 0    | 100.7 | 0.3798 | 1.7 |
| 4/21/2018 18:20 | 6.4  | 6.5  | 5.7  | 24.3 | 0    | 96.8  | 0.4147 | 1.7 |
| 4/21/2018 18:21 | 6    | 7    | 6.3  | 23.9 | 2    | 41.4  | 0.385  | 1.7 |
| 4/21/2018 18:22 |      |      | 6.4  | 23.5 | 17.5 | 69.9  | 0.4236 | 1.7 |
| 4/21/2018 18:23 |      |      | 5    | 23.4 | 68.5 | 84.6  | 0.4006 | 1.7 |
| 4/21/2018 18:24 |      |      | 4.6  | 23.1 | 76.4 | 28    | 0.3742 | 1.7 |
| 4/21/2018 18:25 |      |      | 5.8  | 23.2 | 77.2 | 24.5  | 0.3578 | 1.7 |
| 4/21/2018 18:26 |      |      | 4    | 23.2 | 63.2 | 22.3  | 0.3448 | 1.7 |
| 4/21/2018 18:27 |      |      | 5    | 22.9 | 5.1  | 6.7   | 0.41   | 1.7 |
| 4/21/2018 18:28 |      |      | 6.1  | 23.4 | 6.1  | 3.2   | 0.3812 | 1.7 |
| 4/21/2018 18:29 |      |      | 7.1  | 23.4 | 6.1  | 3.3   | 0.4123 | 1.7 |
| 4/21/2018 18:30 |      |      | 6.2  | 23.1 | 6.1  | 2.9   | 0.3639 | 1.7 |
| 4/21/2018 18:31 |      |      | 5.8  | 23.4 | 6.1  | 2.9   | 0.3446 | 1.7 |
| 4/21/2018 18:32 |      |      | 5.2  | 23.6 | 5.8  | 2.9   | 0.3692 | 1.7 |
| 4/21/2018 18:33 |      |      | 6.1  | 23   | 6.1  | 2.9   | 0.3964 | 1.8 |
| 4/21/2018 18:34 |      |      | 5.7  | 23.3 | 6.1  | 2.9   | 0.391  | 1.8 |
| 4/21/2018 18:35 |      |      | 4.7  | 23   | 6.1  | 3     | 0.3911 | 1.8 |
| 4/21/2018 18:36 |      |      | 4.8  | 23.1 | 6    | 3     | 0.3912 | 1.9 |

|                 |     |      |     |     |        |     |
|-----------------|-----|------|-----|-----|--------|-----|
| 4/21/2018 18:37 | 4.9 | 23.1 | 5.7 | 3   | 0.3491 | 1.8 |
| 4/21/2018 18:38 | 4.5 | 23.3 | 5.6 | 3   | 0.3547 | 1.8 |
| 4/21/2018 18:39 | 6.6 | 23.3 | 5.6 | 3   | 0.3293 | 1.9 |
| 4/21/2018 18:40 | 6.7 | 23.7 | 5.4 | 3   | 0.3201 | 1.9 |
| 4/21/2018 18:41 | 6.5 | 23.2 | 5.6 | 3   | 0.3411 | 2   |
| 4/21/2018 18:42 | 6.6 | 23.5 | 5.6 | 2.9 | 0.3391 | 2.1 |
| 4/21/2018 18:43 | 6.1 | 23.2 | 5.7 | 2.9 | 0.3366 | 2.1 |
| 4/21/2018 18:44 | 4.4 | 23   | 5.7 | 2.8 | 0.3356 | 2.1 |
| 4/21/2018 18:45 | 4.6 | 22.9 | 5.6 | 2.8 | 0.3449 | 2.1 |
| 4/21/2018 18:46 | 4.9 | 22.9 | 5.4 | 2.7 | 0.316  | 2.1 |
| 4/21/2018 18:47 | 4.4 | 22.9 | 5.4 | 2.7 | 0.3341 | 2.2 |
| 4/21/2018 18:48 | 5.6 | 23.2 | 5.4 | 2.7 | 0.3154 | 2.2 |
| 4/21/2018 18:49 | 5   | 22.8 | 5.2 | 2.7 | 0.3146 | 2.2 |
| 4/21/2018 18:50 | 5.3 | 23.2 | 5.4 | 2.7 | 0.3083 | 2.2 |
| 4/21/2018 18:51 | 5.5 | 22.8 | 5.2 | 2.7 | 0.3166 | 2.2 |
| 4/21/2018 18:52 | 5.5 | 23   | 5.3 | 2.6 | 0.3134 | 2.3 |
| 4/21/2018 18:53 | 4.8 | 22.7 | 5.1 | 2.6 | 0.3172 | 2.3 |
| 4/21/2018 18:54 | 6.3 | 22.5 | 5.2 | 2.6 | 0.3281 | 2.3 |
| 4/21/2018 18:55 | 5.7 | 22.7 | 5.1 | 2.7 | 0.3029 | 2.3 |
| 4/21/2018 18:56 | 5.6 | 23   | 4.9 | 2.7 | 0.3132 | 2.4 |
| 4/21/2018 18:57 | 4.3 | 22.5 | 5   | 2.7 | 0.3126 | 2.5 |
| 4/21/2018 18:58 | 5.3 | 22.7 | 5.1 | 2.7 | 0.3226 | 2.5 |
| 4/21/2018 18:59 | 4.1 | 22.5 | 4.9 | 2.7 | 0.2916 | 2.5 |
| 4/21/2018 19:00 | 4.6 | 22.8 | 5   | 2.7 | 0.3282 | 2.4 |
| 4/21/2018 19:01 | 5.1 | 22.5 | 5   | 2.7 | 0.3081 | 2.4 |
| 4/21/2018 19:02 | 4.6 | 22.5 | 5   | 2.7 | 0.3108 | 2.4 |
| 4/21/2018 19:03 | 5.3 | 22.8 | 5   | 2.8 | 0.3115 | 2.5 |
| 4/21/2018 19:04 | 4.5 | 22.7 | 5   | 2.8 | 0.3124 | 2.5 |
| 4/21/2018 19:05 | 5.7 | 22.4 | 5.1 | 2.8 | 0.3259 | 2.6 |
| 4/21/2018 19:06 | 4.6 | 22.7 | 5.2 | 2.8 | 0.3102 | 2.6 |
| 4/21/2018 19:07 | 4.2 | 22.3 | 5.2 | 2.8 | 0.3202 | 2.6 |
| 4/21/2018 19:08 | 4.3 | 22.6 | 5.2 | 2.9 | 0.2965 | 2.7 |
| 4/21/2018 19:09 | 3.5 | 22.7 | 5.1 | 2.9 | 0.312  | 2.7 |
| 4/21/2018 19:10 | 3.7 | 22.2 | 5.1 | 2.9 | 0.2984 | 2.7 |
| 4/21/2018 19:11 | 5.6 | 22.5 | 5.2 | 2.9 | 0.3218 | 2.6 |
| 4/21/2018 19:12 | 4.8 | 22.6 | 5.1 | 2.9 | 0.2989 | 2.6 |
| 4/21/2018 19:13 | 5   | 22.2 | 5.1 | 2.9 | 0.2951 | 2.6 |
| 4/21/2018 19:14 | 4.7 | 22.4 | 4.9 | 2.8 | 0.2893 | 2.6 |
| 4/21/2018 19:15 | 3.7 | 22.6 | 4.9 | 2.8 | 0.2837 | 2.6 |
| 4/21/2018 19:16 | 5.5 | 22.5 | 4.8 | 2.8 | 0.2884 | 2.6 |
| 4/21/2018 19:17 | 3.6 | 22.2 | 4.7 | 2.7 | 0.2751 | 2.7 |
| 4/21/2018 19:18 | 4.3 | 22.4 | 4.7 | 2.7 | 0.2872 | 2.7 |
| 4/21/2018 19:19 | 5.4 | 22.1 | 4.7 | 2.6 | 0.2735 | 2.7 |
| 4/21/2018 19:20 | 4   | 22.3 | 4.8 | 2.6 | 0.2888 | 2.6 |
| 4/21/2018 19:21 | 4.7 | 22.5 | 4.8 | 2.6 | 0.2934 | 2.6 |
| 4/21/2018 19:22 | 4.4 | 22.4 | 4.9 | 2.6 | 0.2974 | 2.6 |
| 4/21/2018 19:23 | 5.1 | 22.5 | 4.8 | 2.6 | 0.2883 | 2.6 |

|                 |     |      |     |     |        |     |
|-----------------|-----|------|-----|-----|--------|-----|
| 4/21/2018 19:24 |     | 22.3 | 4.7 | 2.6 | 0.2815 | 2.6 |
| 4/21/2018 19:25 | 4.8 | 22.2 | 4.9 | 2.7 | 0.3074 | 2.7 |
| 4/21/2018 19:26 | 4.5 | 22.3 | 4.8 | 2.7 | 0.2733 | 2.8 |
| 4/21/2018 19:27 | 4.2 | 22.5 | 4.8 | 2.8 | 0.2868 | 2.8 |
| 4/21/2018 19:28 | 6.4 | 22.2 | 4.7 | 2.8 | 0.2715 | 2.8 |
| 4/21/2018 19:29 | 4.3 | 22.3 | 4.6 | 2.8 | 0.2868 | 2.8 |
| 4/21/2018 19:30 | 4.2 | 22.5 | 4.6 | 2.7 | 0.2774 | 2.9 |
| 4/21/2018 19:31 | 3.6 | 22.3 | 4.6 | 2.7 | 0.2861 | 2.9 |
| 4/21/2018 19:32 | 5.1 | 22.3 | 4.6 | 2.7 | 0.2707 | 2.9 |
| 4/21/2018 19:33 | 4.7 | 22.1 | 4.6 | 2.7 | 0.2719 | 3   |
| 4/21/2018 19:34 | 4.5 | 22   | 4.7 | 2.7 | 0.2897 | 2.8 |
| 4/21/2018 19:35 | 4.7 | 22.1 | 4.6 | 2.7 | 0.2734 | 2.8 |
| 4/21/2018 19:36 | 4.8 | 22.2 | 4.6 | 2.7 | 0.2844 | 2.9 |
| 4/21/2018 19:37 | 3.3 | 22.3 | 4.6 | 2.7 | 0.2689 | 2.9 |
| 4/21/2018 19:38 | 4.7 | 22.2 | 4.6 | 2.6 | 0.281  | 2.9 |
| 4/21/2018 19:39 | 6.4 | 22.2 | 4.6 | 2.7 | 0.2672 | 2.9 |
| 4/21/2018 19:40 | 4.2 | 22.2 | 4.7 | 2.7 | 0.2906 | 3   |
| 4/21/2018 19:41 |     | 21.9 | 4.7 | 2.7 | 0.2718 | 3.1 |
| 4/21/2018 19:42 |     | 22.2 | 4.7 | 2.7 | 0.2691 | 3.1 |
| 4/21/2018 19:43 |     | 22.3 | 4.7 | 2.7 | 0.2818 | 3.2 |
| 4/21/2018 19:44 | 9.5 | 22.3 | 4.7 | 2.7 | 0.2671 | 3.1 |
| 4/21/2018 19:45 | 4.8 | 22.2 | 4.6 | 2.7 | 0.2637 | 3.1 |
| 4/21/2018 19:46 |     | 22.7 | 4.6 | 2.7 | 0.2398 | 3.1 |
| 4/21/2018 19:47 | 4.2 | 22.4 | 4.5 | 2.7 | 0.2678 | 3.1 |
| 4/21/2018 19:48 |     | 22.7 | 4.5 | 2.6 | 0.2475 | 3.1 |
| 4/21/2018 19:49 |     | 23   | 4.6 | 2.6 | 0.2694 | 3.1 |
| 4/21/2018 19:50 | 4.2 | 23.2 | 4.7 | 2.5 | 0.235  | 3.1 |
| 4/21/2018 19:51 | 4.1 | 22.2 | 4.7 | 2.5 | 0.2824 | 3.1 |
| 4/21/2018 19:52 |     | 22.8 | 4.7 | 2.5 | 0.2425 | 2.9 |
| 4/21/2018 19:53 | 4   | 22.6 | 4.6 | 2.5 | 0.2428 | 2.9 |
| 4/21/2018 19:54 | 5.7 | 22.8 | 4.6 | 2.4 | 0.2365 | 2.9 |
| 4/21/2018 19:55 | 4.9 | 23   | 4.6 | 2.4 | 0.2298 | 2.8 |
| 4/21/2018 19:56 | 4.7 | 22.5 | 4.6 | 2.4 | 0.2584 | 2.9 |
| 4/21/2018 19:57 | 5.5 | 22.6 | 4.6 | 2.4 | 0.2217 | 2.9 |
| 4/21/2018 19:58 | 4.6 | 22.6 | 4.5 | 2.4 | 0.2451 | 3   |
| 4/21/2018 19:59 | 5.4 | 23.8 | 4.6 | 2.3 | 0.224  | 3.2 |
| 4/21/2018 20:00 | 5.2 | 23   | 4.7 | 2.3 | 0.265  | 3.2 |
| 4/21/2018 20:01 | 5.3 | 22.9 | 4.5 | 2.3 | 0.2356 | 3.1 |
| 4/21/2018 20:02 | 4.6 | 23.1 | 4.5 | 2.3 | 0.2276 | 2.9 |
| 4/21/2018 20:03 | 5   | 23.2 | 4.5 | 2.3 | 0.2383 | 2.9 |
| 4/21/2018 20:04 | 6   | 23.3 | 4.9 | 2.3 | 0.2498 | 2.9 |
| 4/21/2018 20:05 | 4.8 | 22.7 | 4.7 | 2.3 | 0.2504 | 3   |
| 4/21/2018 20:06 | 4.7 | 22.6 | 4.4 | 2.3 | 0.209  | 3.1 |
| 4/21/2018 20:07 | 5.6 | 23.2 | 4.4 | 2.3 | 0.2203 | 3.2 |
| 4/21/2018 20:08 | 5   | 23   | 4.4 | 2.3 | 0.2249 | 3.2 |
| 4/21/2018 20:09 | 4.5 | 22.8 | 4.4 | 2.3 | 0.2396 | 3.2 |
| 4/21/2018 20:10 | 4   | 22.6 | 4.4 | 2.3 | 0.2452 | 3.3 |

|                 |     |      |     |     |        |     |
|-----------------|-----|------|-----|-----|--------|-----|
| 4/21/2018 20:11 | 5.4 | 23.3 | 4.3 | 2.3 | 0.2086 | 3.2 |
| 4/21/2018 20:12 | 5.6 | 23.8 | 4.4 | 2.2 | 0.2115 | 3   |
| 4/21/2018 20:13 | 5.5 | 23.2 | 4.3 | 2.2 | 0.209  | 3.1 |
| 4/21/2018 20:14 | 5.1 | 23.1 | 4.2 | 2.1 | 0.2399 | 3.3 |
| 4/21/2018 20:15 | 5.3 | 23.6 | 4.2 | 2.1 | 0.1993 | 3.4 |
| 4/21/2018 20:16 | 4.7 | 23.2 | 4.3 | 2.1 | 0.2256 | 3.2 |
| 4/21/2018 20:17 | 6.3 | 23.7 | 4.3 | 2.1 | 0.2284 | 3.1 |
| 4/21/2018 20:18 | 3.7 | 22.4 | 4.2 | 2.1 | 0.2363 | 3.1 |
| 4/21/2018 20:19 | 3.7 | 23.6 | 4.1 | 2.2 | 0.2232 | 3.1 |
| 4/21/2018 20:20 | 5.6 | 23.1 | 4.2 | 2.2 | 0.2136 | 3.1 |
| 4/21/2018 20:21 | 5.8 | 23.1 | 4   | 2.2 | 0.2143 | 3.1 |
| 4/21/2018 20:22 | 5.8 | 23   | 4.3 | 2.2 | 0.2113 | 3.3 |
| 4/21/2018 20:23 | 5   | 22.7 | 4.2 | 2.3 | 0.2422 | 3.4 |
| 4/21/2018 20:24 | 6.3 | 23.6 | 4   | 2.3 | 0.2187 | 3.5 |
| 4/21/2018 20:25 | 5.4 | 23.5 | 4   | 2.2 | 0.1928 | 3.5 |
| 4/21/2018 20:26 | 5   | 23.3 | 4.1 | 2.2 | 0.2494 | 3.5 |
| 4/21/2018 20:27 | 3.5 | 23.2 | 4.2 | 2.2 | 0.2314 | 3.6 |
| 4/21/2018 20:28 | 6   | 23.6 | 4   | 2.2 | 0.1969 | 3.5 |
| 4/21/2018 20:29 | 5.2 | 23.5 | 4.1 | 2.2 | 0.19   | 3.5 |
| 4/21/2018 20:30 | 4   | 22.9 | 4.2 | 2.2 | 0.2349 | 3.4 |
| 4/21/2018 20:31 | 4.6 | 22.6 | 4.2 | 2.2 | 0.2362 | 3.3 |
| 4/21/2018 20:32 | 4.5 | 22.6 | 4.2 | 2.3 | 0.243  | 3.4 |
| 4/21/2018 20:33 | 4.5 | 22.5 | 4.2 | 2.4 | 0.2421 | 3.5 |
| 4/21/2018 20:34 | 4.8 | 22.9 | 4.2 | 2.4 | 0.2171 | 3.6 |
| 4/21/2018 20:35 | 4.7 | 22.9 | 4.2 | 2.4 | 0.2379 | 3.6 |
| 4/21/2018 20:36 | 5   | 22.6 | 4.2 | 2.5 | 0.233  | 3.5 |
| 4/21/2018 20:37 | 4.2 | 22.4 | 4.2 | 2.6 | 0.2292 | 3.6 |
| 4/21/2018 20:38 | 4.8 | 22.4 | 4.2 | 2.6 | 0.2353 | 3.5 |
| 4/21/2018 20:39 | 4.9 | 22.9 | 4.3 | 2.5 | 0.2248 | 3.1 |
| 4/21/2018 20:40 | 5.3 | 22.6 | 4.1 | 2.5 | 0.2462 | 3.2 |
| 4/21/2018 20:41 | 4.8 | 22.4 | 4.1 | 2.5 | 0.2295 | 3.2 |
| 4/21/2018 20:42 | 4.6 | 22.4 | 4.2 | 2.6 | 0.2336 | 3.1 |
| 4/21/2018 20:43 | 4.2 | 22.3 | 4.3 | 2.5 | 0.2288 | 3.1 |
| 4/21/2018 20:44 | 4.2 | 22.5 | 4.3 | 2.5 | 0.2374 | 3.1 |
| 4/21/2018 20:45 | 3.9 | 22.3 | 4.3 | 2.6 | 0.2243 | 3.1 |
| 4/21/2018 20:46 | 5   | 22.4 | 4.3 | 2.6 | 0.2305 | 3   |
| 4/21/2018 20:47 | 4.3 | 22.1 | 4.2 | 2.6 | 0.2427 | 3.1 |
| 4/21/2018 20:48 | 4.4 | 22.4 | 4.2 | 2.6 | 0.231  | 3.1 |
| 4/21/2018 20:49 | 3.8 | 22.2 | 4.3 | 2.6 | 0.2385 | 3.2 |
| 4/21/2018 20:50 | 4   | 22   | 4.2 | 2.6 | 0.2263 | 3.2 |
| 4/21/2018 20:51 | 4   | 22.1 | 4.2 | 2.7 | 0.2475 | 3.3 |
| 4/21/2018 20:52 | 4.3 | 22.1 | 4.4 | 2.7 | 0.2352 | 3.5 |
| 4/21/2018 20:53 | 3.8 | 22   | 4.4 | 2.7 | 0.2364 | 3.5 |
| 4/21/2018 20:54 | 5.1 | 22.1 | 4.4 | 2.7 | 0.2338 | 3.6 |
| 4/21/2018 20:55 | 4.4 | 22.2 | 4.5 | 2.7 | 0.2366 | 3.6 |
| 4/21/2018 20:56 | 3.7 | 22.3 | 4.4 | 2.7 | 0.2412 | 3.6 |
| 4/21/2018 20:57 | 4   | 21.9 | 4.5 | 2.7 | 0.2225 | 3.7 |

|                 |     |      |     |     |        |     |
|-----------------|-----|------|-----|-----|--------|-----|
| 4/21/2018 20:58 | 3.8 | 22.5 | 4.4 | 2.7 | 0.24   | 3.7 |
| 4/21/2018 20:59 | 5.6 | 22.2 | 4.6 | 2.7 | 0.2141 | 3.7 |
| 4/21/2018 21:00 | 5.4 | 22   | 4.6 | 2.7 | 0.2354 | 3.7 |
| 4/21/2018 21:01 | 4.3 | 21.9 | 4.5 | 2.6 | 0.2299 | 3.8 |
| 4/21/2018 21:02 | 3.8 | 22.4 | 4.5 | 2.6 | 0.2192 | 3.5 |
| 4/21/2018 21:03 | 3.4 | 22.2 | 4.6 | 2.6 | 0.2266 | 3.3 |
| 4/21/2018 21:04 | 4.3 | 22   | 4.6 | 2.6 | 0.2219 | 3.4 |
| 4/21/2018 21:05 | 2.9 | 22.1 | 4.5 | 2.6 | 0.2255 | 3.4 |
| 4/21/2018 21:06 | 3.3 | 21.8 | 4.5 | 2.6 | 0.2135 | 3.2 |
| 4/21/2018 21:07 | 3.9 | 22   | 4.7 | 2.6 | 0.2216 | 2.9 |
| 4/21/2018 21:08 | 4.7 | 22.1 | 4.6 | 2.6 | 0.2197 | 2.7 |
| 4/21/2018 21:09 | 4.3 | 22.1 | 4.6 | 2.7 | 0.2186 | 2.8 |
| 4/21/2018 21:10 | 6   | 22   | 4.5 | 2.7 | 0.2218 | 2.8 |
| 4/21/2018 21:11 | 6.2 | 22   | 4.5 | 2.7 | 0.2157 | 2.9 |
| 4/21/2018 21:12 | 3.8 | 22.2 | 4.5 | 2.7 | 0.2301 | 2.9 |
| 4/21/2018 21:13 | 4.8 | 22.2 | 4.4 | 2.7 | 0.2177 | 2.9 |
| 4/21/2018 21:14 | 5.2 | 21.8 | 4.4 | 2.7 | 0.2258 | 3   |
| 4/21/2018 21:15 | 4.8 | 22   | 4.5 | 2.7 | 0.2138 | 2.9 |
| 4/21/2018 21:16 | 4.8 | 21.8 | 4.5 | 2.7 | 0.2182 | 2.9 |
| 4/21/2018 21:17 | 3.4 | 22   | 4.5 | 2.7 | 0.2175 | 2.8 |
| 4/21/2018 21:18 | 5   | 21.9 | 4.5 | 2.7 | 0.2133 | 2.7 |
| 4/21/2018 21:19 | 3.8 | 21.8 | 4.5 | 2.7 | 0.2132 | 2.8 |
| 4/21/2018 21:20 | 4.5 | 22.2 | 4.5 | 2.7 | 0.199  | 3   |
| 4/21/2018 21:21 | 3.9 | 21.8 | 4.5 | 2.7 | 0.2218 | 2.9 |
| 4/21/2018 21:22 | 4   | 22   | 4.5 | 2.7 | 0.2061 | 3.1 |
| 4/21/2018 21:23 | 4.6 | 21.9 | 4.4 | 2.7 | 0.2193 | 3.2 |
| 4/21/2018 21:24 | 3.8 | 22   | 4.5 | 2.7 | 0.2061 | 3.2 |
| 4/21/2018 21:25 | 5.4 | 22.1 | 4.4 | 2.7 | 0.2122 | 3.2 |
| 4/21/2018 21:26 | 5.3 | 21.8 | 4.4 | 2.7 | 0.2107 | 3.2 |
| 4/21/2018 21:27 | 4.3 | 21.7 | 4.5 | 2.6 | 0.2095 | 3.2 |
| 4/21/2018 21:28 | 3.8 | 22   | 4.5 | 2.6 | 0.2184 | 3.3 |
| 4/21/2018 21:29 | 5.4 | 21.8 | 4.4 | 2.6 | 0.2003 | 3.3 |
| 4/21/2018 21:30 | 4.7 | 21.6 | 4.4 | 2.6 | 0.2171 | 3.4 |
| 4/21/2018 21:31 | 3.8 | 21.9 | 4.4 | 2.6 | 0.1996 | 3.3 |
| 4/21/2018 21:32 | 3.9 | 22.1 | 4.4 | 2.6 | 0.2099 | 2.9 |
| 4/21/2018 21:33 | 4.4 | 21.9 | 4.4 | 2.6 | 0.2065 | 3.2 |
| 4/21/2018 21:34 | 4.6 | 21.8 | 4.4 | 2.6 | 0.2027 | 2.9 |
| 4/21/2018 21:35 | 4.8 | 21.9 | 4.4 | 2.6 | 0.2125 | 2.2 |
| 4/21/2018 21:36 | 4.3 | 21.9 | 4.4 | 2.6 | 0.2015 | 2.2 |
| 4/21/2018 21:37 | 3.7 | 22   | 4.4 | 2.6 | 0.2093 | 2.4 |
| 4/21/2018 21:38 | 4.7 | 21.9 | 4.4 | 2.6 | 0.2    | 2.5 |
| 4/21/2018 21:39 | 4.5 | 22   | 4.4 | 2.6 | 0.2107 | 2.6 |
| 4/21/2018 21:40 | 5.4 | 22.1 | 4.4 | 2.6 | 0.2134 | 2.7 |
| 4/21/2018 21:41 | 3.8 | 21.8 | 4.4 | 2.6 | 0.2017 | 2.8 |
| 4/21/2018 21:42 | 4.9 | 21.5 | 4.4 | 2.6 | 0.2086 | 3.1 |
| 4/21/2018 21:43 | 4.5 | 21.8 | 4.4 | 2.6 | 0.1943 | 3.3 |
| 4/21/2018 21:44 | 5.2 | 22   | 4.4 | 2.6 | 0.2081 | 3.5 |

|                 |     |      |     |     |        |     |
|-----------------|-----|------|-----|-----|--------|-----|
| 4/21/2018 21:45 | 4.5 | 21.7 | 4.4 | 2.6 | 0.188  | 3.6 |
| 4/21/2018 21:46 | 5.2 | 21.8 | 4.5 | 2.6 | 0.2014 | 3.5 |
| 4/21/2018 21:47 | 3.4 | 21.8 | 4.4 | 2.6 | 0.2073 | 3.5 |
| 4/21/2018 21:48 | 4.4 | 21.9 | 4.4 | 2.6 | 0.1992 | 3.6 |
| 4/21/2018 21:49 | 4.2 | 21.8 | 4.4 | 2.6 | 0.2006 | 3.7 |
| 4/21/2018 21:50 | 4.1 | 21.8 | 4.4 | 2.6 | 0.1898 | 3.8 |
| 4/21/2018 21:51 | 5.1 | 21.9 | 4.5 | 2.6 | 0.2026 | 3.9 |
| 4/21/2018 21:52 | 3.4 | 21.8 | 4.5 | 2.6 | 0.1922 | 3.7 |
| 4/21/2018 21:53 | 3   | 22   | 4.4 | 2.6 | 0.2015 | 3.4 |
| 4/21/2018 21:54 | 3.9 | 21.7 | 4.5 | 2.6 | 0.1968 | 3.2 |
| 4/21/2018 21:55 | 4.3 | 21.8 | 4.5 | 2.6 | 0.1997 | 3.2 |
| 4/21/2018 21:56 | 4.4 | 21.9 | 4.5 | 2.6 | 0.1994 | 3.5 |
| 4/21/2018 21:57 | 3.3 | 21.7 | 4.5 | 2.6 | 0.1906 | 3.6 |
| 4/21/2018 21:58 | 3.4 | 21.9 | 4.6 | 2.6 | 0.1969 | 3.7 |
| 4/21/2018 21:59 | 5.2 | 21.9 | 4.7 | 2.6 | 0.1848 | 3.8 |
| 4/21/2018 22:00 | 3.1 | 21.6 | 4.6 | 2.6 | 0.2047 | 3.8 |
| 4/21/2018 22:01 | 3.4 | 21.7 | 4.6 | 2.5 | 0.1939 | 3.9 |
| 4/21/2018 22:02 | 3.7 | 21.7 | 4.5 | 2.5 | 0.1969 | 3.8 |
| 4/21/2018 22:03 | 4.5 | 21.8 | 4.6 | 2.6 | 0.1981 | 3.8 |
| 4/21/2018 22:04 | 2.6 | 21.9 | 4.6 | 2.6 | 0.1873 | 3.8 |
| 4/21/2018 22:05 | 3   | 21.8 | 4.6 | 2.6 | 0.2006 | 3.9 |
| 4/21/2018 22:06 | 3.2 | 21.5 | 4.6 | 2.6 | 0.184  | 3.9 |
| 4/21/2018 22:07 | 4.4 | 21.8 | 4.6 | 2.6 | 0.1958 | 3.9 |
| 4/21/2018 22:08 | 3   | 21.6 | 4.6 | 2.6 | 0.1837 | 3.9 |
| 4/21/2018 22:09 | 3.9 | 21.8 | 4.7 | 2.6 | 0.1935 | 3.9 |
| 4/21/2018 22:10 | 4.6 | 21.7 | 4.7 | 2.6 | 0.1846 | 4   |
| 4/21/2018 22:11 | 4.7 | 21.9 | 4.7 | 2.6 | 0.192  | 4   |
| 4/21/2018 22:12 | 1.8 | 21.7 | 4.7 | 2.6 | 0.1939 | 4.1 |
| 4/21/2018 22:13 | 4.4 | 21.7 | 4.7 | 2.6 | 0.1886 | 4.1 |
| 4/21/2018 22:14 | 3.6 | 21.7 | 4.7 | 2.6 | 0.1976 | 4.1 |
| 4/21/2018 22:15 | 4.6 | 21.6 | 4.8 | 2.6 | 0.1855 | 4   |
| 4/21/2018 22:16 | 3.8 | 22   | 4.8 | 2.6 | 0.1946 | 3.9 |
| 4/21/2018 22:17 |     | 21.7 | 4.8 | 2.6 | 0.1853 | 3.9 |
| 4/21/2018 22:18 | 4.2 | 21.7 | 4.8 | 2.6 | 0.1903 | 3.9 |
| 4/21/2018 22:19 | 5.7 | 21.6 | 4.8 | 2.6 | 0.1855 | 4   |
| 4/21/2018 22:20 | 5   | 21.8 | 4.8 | 2.6 | 0.1835 | 4   |
| 4/21/2018 22:21 | 4.3 | 21.5 | 4.8 | 2.6 | 0.1849 | 4   |
| 4/21/2018 22:22 | 3.6 | 21.6 | 4.8 | 2.6 | 0.1791 | 4   |
| 4/21/2018 22:23 | 3.7 | 21.6 | 4.8 | 2.6 | 0.1893 | 4   |
| 4/21/2018 22:24 | 4.2 | 21.6 | 4.8 | 2.5 | 0.1735 | 4   |
| 4/21/2018 22:25 | 4.7 | 21.6 | 4.8 | 2.5 | 0.1933 | 3.9 |
| 4/21/2018 22:26 | 2.1 | 21.5 | 4.8 | 2.5 | 0.1799 | 3.8 |
| 4/21/2018 22:27 | 3.8 | 21.6 | 4.9 | 2.5 | 0.1871 | 3.9 |
| 4/21/2018 22:28 | 4.4 | 21.6 | 4.8 | 2.6 | 0.1765 | 4   |
| 4/21/2018 22:29 | 2.8 | 21.8 | 4.9 | 2.6 | 0.1787 | 4.1 |
| 4/21/2018 22:30 | 3.8 | 21.5 | 4.9 | 2.6 | 0.1826 | 4.3 |
| 4/21/2018 22:31 | 4.6 | 21.8 | 4.9 | 2.5 | 0.1778 | 3.4 |

|                 |     |      |     |     |        |     |
|-----------------|-----|------|-----|-----|--------|-----|
| 4/21/2018 22:32 | 4.4 | 21.4 | 4.8 | 2.6 | 0.1821 | 2.1 |
| 4/21/2018 22:33 | 3.8 | 21.5 | 4.9 | 2.6 | 0.1698 | 2.3 |
| 4/21/2018 22:34 |     | 21.5 | 4.9 | 2.5 | 0.1864 | 2.3 |
| 4/21/2018 22:35 |     | 21.7 | 4.9 | 2.5 | 0.172  | 2.5 |
| 4/21/2018 22:36 | 3.7 | 21.3 | 4.9 | 2.5 | 0.1792 | 2.9 |
| 4/21/2018 22:37 |     | 21.5 | 4.9 | 2.5 | 0.1734 | 3.1 |
| 4/21/2018 22:38 | 4   | 21.6 | 4.9 | 2.5 | 0.1724 | 3.2 |
| 4/21/2018 22:39 |     | 21.5 | 4.9 | 2.5 | 0.1789 | 3.2 |
| 4/21/2018 22:40 | 3.4 | 21.4 | 4.9 | 2.5 | 0.1749 | 3.3 |
| 4/21/2018 22:41 | 3.5 | 21.6 | 4.9 | 2.5 | 0.1833 | 3.3 |
| 4/21/2018 22:42 | 7.1 | 21.6 | 4.9 | 2.5 | 0.1652 | 3.3 |
| 4/21/2018 22:43 | 3.4 | 21.6 | 4.9 | 2.5 | 0.1893 | 3.1 |
| 4/21/2018 22:44 | 7.7 | 21.5 | 4.9 | 2.5 | 0.17   | 3   |
| 4/21/2018 22:45 | 6.3 | 21.5 | 5   | 2.5 | 0.185  | 3.1 |
| 4/21/2018 22:46 | 3   | 21.5 | 5   | 2.5 | 0.1696 | 3   |
| 4/21/2018 22:47 | 3.7 | 21.2 | 5   | 2.5 | 0.1693 | 3   |
| 4/21/2018 22:48 | 4.9 | 21.3 | 5   | 2.5 | 0.1853 | 3.1 |
| 4/21/2018 22:49 | 4.1 | 21.4 | 5.1 | 2.5 | 0.1638 | 3.3 |
| 4/21/2018 22:50 | 4   | 21.4 | 5.2 | 2.5 | 0.1728 | 3.5 |
| 4/21/2018 22:51 | 4.5 | 21.4 | 5.1 | 2.5 | 0.1615 | 3.5 |
| 4/21/2018 22:52 | 4.1 | 21.4 | 5.2 | 2.5 | 0.1773 | 3.3 |
| 4/21/2018 22:53 | 4.4 | 21.5 | 5.2 | 2.5 | 0.1693 | 3.3 |
| 4/21/2018 22:54 | 2.6 | 21.4 | 5.2 | 2.5 | 0.1793 | 3.4 |
| 4/21/2018 22:55 | 3.5 | 21.3 | 5.3 | 2.5 | 0.1713 | 3.1 |
| 4/21/2018 22:56 | 3   | 21.3 | 5.3 | 2.5 | 0.1728 | 2.8 |
| 4/21/2018 22:57 | 3.6 | 21.1 | 5.4 | 2.5 | 0.1748 | 2.9 |
| 4/21/2018 22:58 | 4.2 | 21   | 5.4 | 2.5 | 0.1689 | 3   |
| 4/21/2018 22:59 | 3.7 | 21.2 | 5.5 | 2.5 | 0.1807 | 3.2 |
| 4/21/2018 23:00 | 4.4 | 21.2 | 5.7 | 2.5 | 0.1638 | 3.3 |
| 4/21/2018 23:01 | 5.2 | 21.1 | 5.5 | 2.5 | 0.1721 | 3.3 |
| 4/21/2018 23:02 | 2.8 | 21.1 | 5.6 | 2.5 | 0.1653 | 3.2 |
| 4/21/2018 23:03 | 2.6 | 21   | 5.5 | 2.5 | 0.1747 | 3.1 |
| 4/21/2018 23:04 | 2.8 | 20.9 | 5.6 | 2.5 | 0.1787 | 3.2 |
| 4/21/2018 23:05 | 3.5 | 21.1 | 5.6 | 2.5 | 0.1609 | 3.1 |
| 4/21/2018 23:06 | 3.2 | 21.2 | 5.6 | 2.5 | 0.1716 | 2.7 |
| 4/21/2018 23:07 | 4.9 | 20.9 | 5.7 | 2.5 | 0.1523 | 2.4 |
| 4/21/2018 23:08 | 4.5 | 20.8 | 5.7 | 2.5 | 0.1746 | 2.5 |
| 4/21/2018 23:09 | 4.6 | 21.1 | 5.7 | 2.5 | 0.1532 | 2.7 |
| 4/21/2018 23:10 | 3.7 | 20.9 | 5.7 | 2.5 | 0.1767 | 2.8 |
| 4/21/2018 23:11 | 3.6 | 21.1 | 5.7 | 2.5 | 0.1651 | 3   |
| 4/21/2018 23:12 | 3.2 | 21   | 5.8 | 2.5 | 0.1639 | 2.9 |
| 4/21/2018 23:13 | 3.7 | 20.9 | 5.8 | 2.5 | 0.1728 | 2.8 |
| 4/21/2018 23:14 | 3   | 21   | 5.8 | 2.5 | 0.1575 | 2.7 |
| 4/21/2018 23:15 | 3.5 | 21.2 | 5.8 | 2.5 | 0.1823 | 2.6 |
| 4/21/2018 23:16 | 3.5 | 21.1 | 5.8 | 2.5 | 0.1487 | 2.7 |
| 4/21/2018 23:17 | 3.7 | 21.1 | 5.9 | 2.5 | 0.1751 | 2.9 |
| 4/21/2018 23:18 | 5.1 | 21.3 | 5.9 | 2.5 | 0.1587 | 2.8 |

|                 |     |      |     |     |        |     |
|-----------------|-----|------|-----|-----|--------|-----|
| 4/21/2018 23:19 | 4.5 | 21   | 5.9 | 2.5 | 0.1672 | 2.6 |
| 4/21/2018 23:20 | 3.9 | 20.9 | 5.9 | 2.5 | 0.1687 | 2.7 |
| 4/21/2018 23:21 | 2.8 | 20.9 | 5.8 | 2.5 | 0.158  | 2.8 |
| 4/21/2018 23:22 | 4.8 | 21   | 5.9 | 2.5 | 0.174  | 2.9 |
| 4/21/2018 23:23 | 3.9 | 21.1 | 5.9 | 2.5 | 0.1603 | 3   |
| 4/21/2018 23:24 | 3.1 | 20.9 | 5.9 | 2.5 | 0.1672 | 2.9 |
| 4/21/2018 23:25 | 4.3 | 21   | 5.9 | 2.5 | 0.1626 | 2.9 |
| 4/21/2018 23:26 | 3.9 | 20.7 | 6   | 2.5 | 0.164  | 2.8 |
| 4/21/2018 23:27 | 3   | 21   | 5.9 | 2.5 | 0.1626 | 2.8 |
| 4/21/2018 23:28 | 2.5 | 20.7 | 6   | 2.5 | 0.1485 | 2.7 |
| 4/21/2018 23:29 | 3.4 | 20.8 | 6   | 2.6 | 0.1716 | 2.7 |
| 4/21/2018 23:30 | 3.6 | 20.9 | 5.9 | 2.6 | 0.1563 | 2.7 |
| 4/21/2018 23:31 | 4.5 | 20.8 | 5.9 | 2.6 | 0.1712 | 2.8 |
| 4/21/2018 23:32 | 3.3 | 20.9 | 5.9 | 2.6 | 0.1547 | 2.9 |
| 4/21/2018 23:33 | 3.5 | 20.8 | 5.9 | 2.6 | 0.1676 | 2.9 |
| 4/21/2018 23:34 | 3.5 | 21   | 5.9 | 2.6 | 0.1465 | 2.9 |
| 4/21/2018 23:35 | 3.3 | 21   | 5.9 | 2.6 | 0.1639 | 2.9 |
| 4/21/2018 23:36 | 4.4 | 21.1 | 5.9 | 2.6 | 0.1645 | 2.9 |
| 4/21/2018 23:37 | 3.4 | 20.9 | 5.9 | 2.6 | 0.1473 | 2.9 |
| 4/21/2018 23:38 | 4.2 | 21   | 5.9 | 2.5 | 0.1664 | 3   |
| 4/21/2018 23:39 | 4.5 | 20.9 | 5.9 | 2.6 | 0.1494 | 3   |
| 4/21/2018 23:40 | 4.5 | 20.8 | 5.9 | 2.6 | 0.1588 | 3   |
| 4/21/2018 23:41 | 2.4 | 20.8 | 5.8 | 2.5 | 0.1527 | 3.1 |
| 4/21/2018 23:42 | 3.2 | 20.9 | 5.8 | 2.5 | 0.1602 | 3.1 |
| 4/21/2018 23:43 | 3.3 | 20.7 | 5.8 | 2.6 | 0.1532 | 3.1 |
| 4/21/2018 23:44 | 3.4 | 20.9 | 5.8 | 2.5 | 0.1559 | 2.9 |
| 4/21/2018 23:45 | 3.3 | 20.7 | 5.8 | 2.5 | 0.1649 | 2.9 |
| 4/21/2018 23:46 | 4.1 | 21   | 5.8 | 2.5 | 0.1461 | 3   |
| 4/21/2018 23:47 | 3.3 | 20.8 | 5.8 | 2.5 | 0.1664 | 3.1 |
| 4/21/2018 23:48 | 3.9 | 21.2 | 5.8 | 2.5 | 0.1472 | 3.2 |
| 4/21/2018 23:49 | 4.4 | 20.9 | 5.8 | 2.5 | 0.1593 | 3.3 |
| 4/21/2018 23:50 | 3.1 | 20.8 | 5.8 | 2.5 | 0.1541 | 3.4 |
| 4/21/2018 23:51 | 3.1 | 20.8 | 5.7 | 2.5 | 0.1635 | 3.5 |
| 4/21/2018 23:52 | 4.7 | 20.9 | 5.7 | 2.5 | 0.1558 | 3.1 |
| 4/21/2018 23:53 | 3.9 | 21   | 5.7 | 2.5 | 0.1502 | 2.4 |
| 4/21/2018 23:54 | 3.8 | 20.9 | 5.6 | 2.5 | 0.1616 | 2.6 |
| 4/21/2018 23:55 | 4.2 | 20.8 | 5.6 | 2.5 | 0.1401 | 2.9 |
| 4/21/2018 23:56 | 4.4 | 20.7 | 5.6 | 2.5 | 0.1645 | 3   |
| 4/21/2018 23:57 | 2.9 | 20.7 | 5.7 | 2.5 | 0.1441 | 3   |
| 4/21/2018 23:58 | 5.4 | 20.8 | 5.6 | 2.5 | 0.1581 | 2.9 |
| 4/21/2018 23:59 | 4.2 | 20.9 | 5.6 | 2.5 | 0.1539 | 2.6 |
| 4/22/2018 0:00  | 3.7 | 21   | 5.6 | 2.5 | 0.1566 | 2.5 |
| 4/22/2018 0:01  | 1.5 | 20.8 | 5.5 | 2.5 | 0.1559 | 2.5 |
| 4/22/2018 0:02  | 3.2 | 20.9 | 5.5 | 2.5 | 0.1529 | 2.6 |
| 4/22/2018 0:03  | 4.1 | 21   | 5.5 | 2.5 | 0.1541 | 2.7 |
| 4/22/2018 0:04  | 5   | 20.9 | 5.5 | 2.5 | 0.1474 | 2.7 |
| 4/22/2018 0:05  | 1.6 | 20.6 | 5.5 | 2.5 | 0.1573 | 2.6 |



|                |     |      |     |     |        |     |
|----------------|-----|------|-----|-----|--------|-----|
| 4/22/2018 0:06 | 3.5 | 20.9 | 5.5 | 2.5 | 0.153  | 2.7 |
| 4/22/2018 0:07 | 2.2 | 21   | 5.4 | 2.5 | 0.1569 | 2.7 |
| 4/22/2018 0:08 | 4   | 20.9 | 5.4 | 2.5 | 0.1456 | 2.6 |
| 4/22/2018 0:09 | 4.9 | 20.7 | 5.4 | 2.5 | 0.1545 | 2.7 |
| 4/22/2018 0:10 | 4.8 | 20.9 | 5.4 | 2.5 | 0.1502 | 2.7 |
| 4/22/2018 0:11 | 4   | 20.8 | 5.3 | 2.5 | 0.1513 | 2.6 |
| 4/22/2018 0:12 | 3.6 | 20.9 | 5.4 | 2.5 | 0.152  | 2.7 |
| 4/22/2018 0:13 | 3.5 | 20.8 | 5.3 | 2.5 | 0.1469 | 2.7 |
| 4/22/2018 0:14 | 3.7 | 20.8 | 5.3 | 2.5 | 0.1556 | 2.7 |
| 4/22/2018 0:15 | 4.9 | 21   | 5.2 | 2.5 | 0.1401 | 2.8 |
| 4/22/2018 0:16 | 4.7 | 20.9 | 5.2 | 2.5 | 0.1452 | 2.8 |
| 4/22/2018 0:17 | 3.7 | 21   | 5.2 | 2.5 | 0.1492 | 3   |
| 4/22/2018 0:18 | 3.7 | 20.7 | 5.2 | 2.5 | 0.1465 | 3   |
| 4/22/2018 0:19 | 3.4 | 21   | 5.2 | 2.5 | 0.154  | 3   |
| 4/22/2018 0:20 | 3.6 | 20.8 | 5.2 | 2.5 | 0.1397 | 2.5 |
| 4/22/2018 0:21 | 3   | 21   | 5.1 | 2.5 | 0.149  | 2.5 |
| 4/22/2018 0:22 | 3.4 | 21   | 5.1 | 2.5 | 0.15   | 2.8 |
| 4/22/2018 0:23 | 4.8 | 21.1 | 5.1 | 2.5 | 0.1443 | 2.8 |
| 4/22/2018 0:24 | 4.4 | 20.9 | 5.1 | 2.5 | 0.1454 | 2.9 |
| 4/22/2018 0:25 | 3.5 | 20.8 | 5.1 | 2.5 | 0.1465 | 2.8 |
| 4/22/2018 0:26 | 3.3 | 20.8 | 5   | 2.5 | 0.1481 | 2.9 |
| 4/22/2018 0:27 | 4.4 | 20.9 | 4.9 | 2.5 | 0.1394 | 2.9 |
| 4/22/2018 0:28 | 3   | 20.9 | 4.9 | 2.5 | 0.1549 | 3   |
| 4/22/2018 0:29 | 3.2 | 21   | 4.9 | 2.5 | 0.1369 | 3   |
| 4/22/2018 0:30 | 3.7 | 20.9 | 5   | 2.5 | 0.1547 | 3   |
| 4/22/2018 0:31 | 3.4 | 20.7 | 4.9 | 2.5 | 0.1491 | 3   |
| 4/22/2018 0:32 | 4.2 | 20.7 | 4.9 | 2.5 | 0.1477 | 3.1 |
| 4/22/2018 0:33 | 5.1 | 21.1 | 4.9 | 2.5 | 0.1517 | 3.1 |
| 4/22/2018 0:34 | 4.4 | 20.9 | 4.8 | 2.5 | 0.1354 | 3.1 |
| 4/22/2018 0:35 | 3.9 | 21   | 4.8 | 2.5 | 0.1528 | 3   |
| 4/22/2018 0:36 | 4.8 | 20.8 | 4.7 | 2.4 | 0.1315 | 2.9 |
| 4/22/2018 0:37 | 4.4 | 21.2 | 4.7 | 2.4 | 0.1512 | 2.6 |
| 4/22/2018 0:38 | 4.4 | 20.9 | 4.7 | 2.4 | 0.129  | 2.6 |
| 4/22/2018 0:39 | 3.2 | 20.9 | 4.7 | 2.4 | 0.1436 | 2.6 |
| 4/22/2018 0:40 | 3.9 | 20.9 | 4.7 | 2.4 | 0.1419 | 2.4 |
| 4/22/2018 0:41 | 4   | 21   | 4.7 | 2.4 | 0.141  | 2.4 |
| 4/22/2018 0:42 | 3.6 | 21   | 4.7 | 2.4 | 0.15   | 2.6 |
| 4/22/2018 0:43 | 3.8 | 20.9 | 4.7 | 2.4 | 0.136  | 2.6 |
| 4/22/2018 0:44 | 3   | 21.1 | 4.6 | 2.4 | 0.1511 | 2.6 |
| 4/22/2018 0:45 | 3.4 | 21.1 | 4.6 | 2.4 | 0.13   | 2.8 |
| 4/22/2018 0:46 | 3.6 | 20.9 | 4.6 | 2.4 | 0.1532 | 2.8 |
| 4/22/2018 0:47 | 4.9 | 21.1 | 4.5 | 2.4 | 0.1334 | 2.7 |
| 4/22/2018 0:48 | 4.4 | 20.9 | 4.5 | 2.4 | 0.1522 | 2.7 |
| 4/22/2018 0:49 | 4.8 | 21.1 | 4.5 | 2.4 | 0.138  | 2.7 |
| 4/22/2018 0:50 | 3   | 21   | 4.4 | 2.4 | 0.1424 | 2.9 |
| 4/22/2018 0:51 | 4.8 | 21.2 | 4.5 | 2.4 | 0.1495 | 3   |
| 4/22/2018 0:52 | 2.3 | 21.2 | 4.5 | 2.4 | 0.1399 | 2.9 |

|                |     |      |     |     |        |     |
|----------------|-----|------|-----|-----|--------|-----|
| 4/22/2018 0:53 | 4.1 | 21.2 | 4.4 | 2.4 | 0.1494 | 3   |
| 4/22/2018 0:54 | 4.3 | 21.3 | 4.4 | 2.4 | 0.1334 | 3   |
| 4/22/2018 0:55 | 4.4 | 21   | 4.4 | 2.4 | 0.1459 | 3.1 |
| 4/22/2018 0:56 | 3.9 | 21.2 | 4.3 | 2.4 | 0.1363 | 3.1 |
| 4/22/2018 0:57 | 5.4 | 21.2 | 4.3 | 2.4 | 0.1417 | 3.2 |
| 4/22/2018 0:58 | 4.6 | 20.9 | 4.3 | 2.4 | 0.1427 | 3.2 |
| 4/22/2018 0:59 | 4.8 | 21   | 4.3 | 2.4 | 0.1372 | 3.2 |
| 4/22/2018 1:00 | 3.2 | 20.9 | 4.3 | 2.4 | 0.1447 | 3.1 |
| 4/22/2018 1:01 | 4.3 | 21.4 | 4.3 | 2.4 | 0.1355 | 3.1 |
| 4/22/2018 1:02 | 4.2 | 20.9 | 4.2 | 2.4 | 0.1441 | 3   |
| 4/22/2018 1:03 | 4.1 | 21   | 4.2 | 2.4 | 0.1323 | 2.9 |
| 4/22/2018 1:04 | 3.4 | 21.2 | 4.2 | 2.4 | 0.1419 | 2.8 |
| 4/22/2018 1:05 | 4.3 | 21.2 | 4.2 | 2.4 | 0.1321 | 2.9 |
| 4/22/2018 1:06 | 4.6 | 21.2 | 4.2 | 2.3 | 0.1371 | 2.8 |
| 4/22/2018 1:07 | 3.6 | 21.1 | 4.2 | 2.3 | 0.1409 | 2.6 |
| 4/22/2018 1:08 | 5.1 | 21.4 | 4.1 | 2.3 | 0.1297 | 2.7 |
| 4/22/2018 1:09 | 2.8 | 20.8 | 4.1 | 2.4 | 0.1444 | 2.6 |
| 4/22/2018 1:10 | 3.9 | 20.7 | 4.2 | 2.4 | 0.1253 | 2.6 |
| 4/22/2018 1:11 | 3.8 | 21   | 4.2 | 2.4 | 0.1414 | 2.8 |
| 4/22/2018 1:12 | 4.1 | 21.1 | 4.2 | 2.4 | 0.1331 | 2.9 |
| 4/22/2018 1:13 | 3.3 | 20.9 | 4.1 | 2.4 | 0.1349 | 3.1 |
| 4/22/2018 1:14 | 4.7 | 21   | 4.1 | 2.3 | 0.1336 | 3.2 |
| 4/22/2018 1:15 | 4.1 | 20.8 | 4.1 | 2.3 | 0.1315 | 3.2 |
| 4/22/2018 1:16 | 2.9 | 20.9 | 4.1 | 2.4 | 0.138  | 3.1 |
| 4/22/2018 1:17 | 3.5 | 21   | 4.1 | 2.4 | 0.1274 | 3.1 |
| 4/22/2018 1:18 | 4.7 | 20.8 | 4.1 | 2.4 | 0.142  | 3.1 |
| 4/22/2018 1:19 | 2.6 | 21.2 | 4.1 | 2.4 | 0.1304 | 3.2 |
| 4/22/2018 1:20 | 3.4 | 21.1 | 4.1 | 2.4 | 0.1358 | 3.3 |
| 4/22/2018 1:21 | 5.1 | 21.1 | 4.1 | 2.4 | 0.1296 | 3.3 |
| 4/22/2018 1:22 | 4.2 | 21   | 4.1 | 2.4 | 0.1343 | 3.3 |
| 4/22/2018 1:23 | 3.2 | 20.8 | 4.1 | 2.4 | 0.139  | 3.3 |
| 4/22/2018 1:24 | 3.8 | 20.8 | 4.1 | 2.4 | 0.1241 | 2.8 |
| 4/22/2018 1:25 | 3.9 | 21   | 4.1 | 2.3 | 0.1372 | 2.8 |
| 4/22/2018 1:26 | 5.3 | 21   | 4.1 | 2.4 | 0.1222 | 3.1 |
| 4/22/2018 1:27 | 3.1 | 21   | 4   | 2.3 | 0.1342 | 3.2 |
| 4/22/2018 1:28 | 3.8 | 20.9 | 4   | 2.3 | 0.1257 | 3.2 |
| 4/22/2018 1:29 | 4.2 | 20.9 | 4.1 | 2.3 | 0.1348 | 3.2 |
| 4/22/2018 1:30 | 4.4 | 20.9 | 4.1 | 2.3 | 0.139  | 3.2 |
| 4/22/2018 1:31 | 4.3 | 20.6 | 4   | 2.3 | 0.1429 | 3.3 |
| 4/22/2018 1:32 | 4.6 | 21   | 4   | 2.3 | 0.142  | 3.4 |
| 4/22/2018 1:33 | 3.7 | 21.2 | 4   | 2.3 | 0.1274 | 3.4 |
| 4/22/2018 1:34 | 3.2 | 21.1 | 4   | 2.3 | 0.1414 | 3.4 |
| 4/22/2018 1:35 | 4.3 | 20.9 | 4   | 2.3 | 0.1237 | 3.4 |
| 4/22/2018 1:36 | 3.9 | 20.8 | 4   | 2.3 | 0.1349 | 3.4 |
| 4/22/2018 1:37 | 4   | 20.9 | 4   | 2.3 | 0.1261 | 3.4 |
| 4/22/2018 1:38 | 4.8 | 21   | 4   | 2.3 | 0.13   | 3.4 |
| 4/22/2018 1:39 | 3.3 | 21   | 4   | 2.3 | 0.1381 | 3.5 |

|                |     |      |     |     |        |     |
|----------------|-----|------|-----|-----|--------|-----|
| 4/22/2018 1:40 | 3.7 | 20.9 | 4   | 2.3 | 0.1252 | 3.5 |
| 4/22/2018 1:41 | 4.6 | 21   | 4   | 2.3 | 0.1327 | 3.4 |
| 4/22/2018 1:42 | 5.4 | 21   | 4   | 2.3 | 0.1268 | 3.3 |
| 4/22/2018 1:43 | 3.7 | 21.1 | 4   | 2.3 | 0.1417 | 3.2 |
| 4/22/2018 1:44 | 3.4 | 21   | 4   | 2.3 | 0.1299 | 3   |
| 4/22/2018 1:45 | 3.4 | 21.1 | 4   | 2.4 | 0.126  | 2.9 |
| 4/22/2018 1:46 | 3.5 | 21   | 3.9 | 2.4 | 0.127  | 3.1 |
| 4/22/2018 1:47 | 4.1 | 21   | 3.9 | 2.3 | 0.1279 | 3.3 |
| 4/22/2018 1:48 | 3.8 | 21   | 3.9 | 2.3 | 0.131  | 3.2 |
| 4/22/2018 1:49 |     | 21.1 | 3.9 | 2.3 | 0.1286 | 3.1 |
| 4/22/2018 1:50 | 4   | 21   | 3.9 | 2.3 | 0.131  | 2.6 |
| 4/22/2018 1:51 | 2.9 | 20.8 | 3.9 | 2.3 | 0.1249 | 2.6 |
| 4/22/2018 1:52 |     | 21.1 | 3.9 | 2.3 | 0.1394 | 2.6 |
| 4/22/2018 1:53 | 7   | 20.9 | 3.9 | 2.3 | 0.1361 | 2.8 |
| 4/22/2018 1:54 |     | 21   | 3.9 | 2.3 | 0.1313 | 2.9 |
| 4/22/2018 1:55 |     | 21.1 | 3.9 | 2.3 | 0.1361 | 3   |
| 4/22/2018 1:56 |     | 21.2 | 3.9 | 2.3 | 0.1242 | 3.1 |
| 4/22/2018 1:57 | 4.3 | 21.2 | 3.9 | 2.3 | 0.1316 | 3   |
| 4/22/2018 1:58 | 9.3 | 20.8 | 3.9 | 2.3 | 0.128  | 2.9 |
| 4/22/2018 1:59 |     | 21   | 3.9 | 2.3 | 0.1355 | 2.9 |
| 4/22/2018 2:00 |     | 20.9 | 3.9 | 2.3 | 0.1257 | 2.9 |
| 4/22/2018 2:01 |     | 21.1 | 3.9 | 2.3 | 0.1271 | 3   |
| 4/22/2018 2:02 |     | 21   | 3.9 | 2.3 | 0.1376 | 3   |
| 4/22/2018 2:03 | 9.4 | 21   | 3.9 | 2.3 | 0.1162 | 2.9 |
| 4/22/2018 2:04 | 4   | 21   | 3.9 | 2.3 | 0.1405 | 2.9 |
| 4/22/2018 2:05 | 2.9 | 21.2 | 3.9 | 2.3 | 0.1219 | 3   |
| 4/22/2018 2:06 | 2.2 | 21.2 | 3.9 | 2.3 | 0.131  | 3.1 |
| 4/22/2018 2:07 | 3.9 | 21   | 3.9 | 2.3 | 0.1188 | 3.1 |
| 4/22/2018 2:08 | 3.9 | 21.1 | 3.9 | 2.3 | 0.1271 | 3.1 |
| 4/22/2018 2:09 | 3.1 | 21   | 3.9 | 2.3 | 0.1279 | 3.2 |
| 4/22/2018 2:10 | 3.9 | 21   | 3.8 | 2.3 | 0.1183 | 3.4 |
| 4/22/2018 2:11 | 5.2 | 21   | 3.9 | 2.3 | 0.1441 | 3.4 |
| 4/22/2018 2:12 | 4.8 | 21   | 3.9 | 2.3 | 0.1239 | 3.5 |
| 4/22/2018 2:13 | 3.6 | 21   | 3.9 | 2.3 | 0.1346 | 3.5 |
| 4/22/2018 2:14 | 3.9 | 21.1 | 3.8 | 2.3 | 0.1141 | 3.5 |
| 4/22/2018 2:15 | 3.6 | 20.9 | 3.8 | 2.3 | 0.1289 | 3.3 |
| 4/22/2018 2:16 | 2.5 | 20.9 | 3.8 | 2.3 | 0.1243 | 3.3 |
| 4/22/2018 2:17 | 4   | 21   | 3.8 | 2.3 | 0.1249 | 3.3 |
| 4/22/2018 2:18 | 4.3 | 20.8 | 3.8 | 2.3 | 0.1271 | 3.4 |
| 4/22/2018 2:19 | 3.6 | 20.9 | 3.8 | 2.3 | 0.1163 | 3.6 |
| 4/22/2018 2:20 | 3.7 | 21   | 3.8 | 2.3 | 0.1286 | 3.6 |
| 4/22/2018 2:21 | 3.4 | 20.8 | 3.8 | 2.3 | 0.1182 | 3.7 |
| 4/22/2018 2:22 | 3.3 | 20.7 | 3.8 | 2.3 | 0.1326 | 3.6 |
| 4/22/2018 2:23 | 1.6 | 21   | 3.8 | 2.3 | 0.1212 | 3.7 |
| 4/22/2018 2:24 | 3.6 | 20.8 | 3.8 | 2.3 | 0.127  | 3.7 |
| 4/22/2018 2:25 | 4.2 | 20.9 | 3.8 | 2.3 | 0.1319 | 3.7 |
| 4/22/2018 2:26 | 3.7 | 21.1 | 3.8 | 2.2 | 0.122  | 3.8 |

|                |     |      |     |     |        |     |
|----------------|-----|------|-----|-----|--------|-----|
| 4/22/2018 2:27 | 3.9 | 20.8 | 3.8 | 2.3 | 0.1314 | 3.8 |
| 4/22/2018 2:28 | 3.6 | 20.9 | 3.8 | 2.3 | 0.1217 | 3.8 |
| 4/22/2018 2:29 | 2.8 | 20.6 | 3.8 | 2.3 | 0.1341 | 3.9 |
| 4/22/2018 2:30 | 4.6 | 20.8 | 3.8 | 2.3 | 0.1133 | 3.9 |
| 4/22/2018 2:31 | 4.4 | 20.9 | 3.8 | 2.3 | 0.1315 | 2.8 |
| 4/22/2018 2:32 | 3.8 | 20.9 | 3.8 | 2.3 | 0.1234 | 2.4 |
| 4/22/2018 2:33 | 3   | 20.9 | 3.8 | 2.3 | 0.1238 | 2.5 |
| 4/22/2018 2:34 | 4.6 | 20.7 | 3.8 | 2.3 | 0.1233 | 2.8 |
| 4/22/2018 2:35 | 4.2 | 20.5 | 3.8 | 2.3 | 0.1196 | 3.1 |
| 4/22/2018 2:36 | 4   | 20.6 | 3.8 | 2.3 | 0.1261 | 3.4 |
| 4/22/2018 2:37 | 5.7 | 20.8 | 3.8 | 2.3 | 0.1193 | 3.5 |
| 4/22/2018 2:38 | 3   | 20.5 | 3.8 | 2.3 | 0.131  | 3.6 |
| 4/22/2018 2:39 | 3.2 | 20.8 | 3.8 | 2.3 | 0.1119 | 3.6 |
| 4/22/2018 2:40 | 4   | 20.8 | 3.8 | 2.3 | 0.1144 | 3.6 |
| 4/22/2018 2:41 | 3.4 | 20.8 | 3.8 | 2.3 | 0.1259 | 3.7 |
| 4/22/2018 2:42 | 2.8 | 20.7 | 3.8 | 2.3 | 0.1158 | 3.8 |
| 4/22/2018 2:43 | 2.8 | 20.6 | 3.8 | 2.3 | 0.1274 | 3.7 |
| 4/22/2018 2:44 | 4.3 | 20.8 | 3.8 | 2.3 | 0.1107 | 3.7 |
| 4/22/2018 2:45 | 3.5 | 20.5 | 3.8 | 2.3 | 0.1315 | 3.8 |
| 4/22/2018 2:46 | 3   | 20.5 | 3.8 | 2.3 | 0.1204 | 3.8 |
| 4/22/2018 2:47 | 4.4 | 20.6 | 3.8 | 2.3 | 0.1255 | 2.7 |
| 4/22/2018 2:48 | 3.1 | 20.6 | 3.8 | 2.3 | 0.1295 | 2.2 |
| 4/22/2018 2:49 | 2.7 | 20.7 | 3.8 | 2.3 | 0.121  | 2.5 |
| 4/22/2018 2:50 | 4.3 | 20.7 | 3.8 | 2.3 | 0.1291 | 2.6 |
| 4/22/2018 2:51 | 4.6 | 20.8 | 3.8 | 2.3 | 0.1215 | 2.5 |
| 4/22/2018 2:52 | 4.1 | 20.7 | 3.9 | 2.3 | 0.1314 | 2.6 |
| 4/22/2018 2:53 | 4.2 | 20.6 | 3.8 | 2.3 | 0.1182 | 2.8 |
| 4/22/2018 2:54 | 3.5 | 20.5 | 3.9 | 2.3 | 0.1252 | 3   |
| 4/22/2018 2:55 | 3.7 | 20.8 | 3.8 | 2.3 | 0.1241 | 3.2 |
| 4/22/2018 2:56 | 4   | 20.5 | 3.8 | 2.3 | 0.1216 | 3.4 |
| 4/22/2018 2:57 | 2.7 | 20.6 | 3.9 | 2.3 | 0.1283 | 3.5 |
| 4/22/2018 2:58 | 3.3 | 20.6 | 3.9 | 2.3 | 0.116  | 3.6 |
| 4/22/2018 2:59 | 4.5 | 20.6 | 3.9 | 2.2 | 0.13   | 3.7 |
| 4/22/2018 3:00 | 3.8 | 20.6 | 3.8 | 2.2 | 0.1174 | 3.7 |
| 4/22/2018 3:01 | 4.3 | 20.5 | 3.8 | 2.3 | 0.1332 | 3.8 |
| 4/22/2018 3:02 | 3.5 | 20.7 | 3.9 | 2.3 | 0.1208 | 3.8 |
| 4/22/2018 3:03 | 3.6 | 20.6 | 3.9 | 2.3 | 0.1273 | 3.9 |
| 4/22/2018 3:04 | 3.3 | 20.4 | 3.9 | 2.3 | 0.1254 | 3.9 |
| 4/22/2018 3:05 | 3.1 | 20.5 | 3.9 | 2.3 | 0.1214 | 3.7 |
| 4/22/2018 3:06 | 3.1 | 20.5 | 3.9 | 2.3 | 0.125  | 3.6 |
| 4/22/2018 3:07 | 4.2 | 20.6 | 3.9 | 2.3 | 0.1169 | 3.7 |
| 4/22/2018 3:08 | 2.5 | 20.7 | 3.9 | 2.3 | 0.1242 | 3.8 |
| 4/22/2018 3:09 | 4.1 | 20.5 | 4   | 2.3 | 0.1107 | 3.9 |
| 4/22/2018 3:10 | 3.5 | 20.4 | 4   | 2.3 | 0.1302 | 3.9 |
| 4/22/2018 3:11 | 3.8 | 20.3 | 4   | 2.3 | 0.1162 | 3.7 |
| 4/22/2018 3:12 | 3.1 | 20.5 | 3.9 | 2.3 | 0.1262 | 3.5 |
| 4/22/2018 3:13 | 4   | 20.5 | 4.2 | 2.3 | 0.1161 | 3.4 |

|                |     |      |     |     |        |     |
|----------------|-----|------|-----|-----|--------|-----|
| 4/22/2018 3:14 | 2.4 | 20.4 | 3.9 | 2.3 | 0.1195 | 3.6 |
| 4/22/2018 3:15 | 3.6 | 20.7 | 4   | 2.3 | 0.1254 | 3.8 |
| 4/22/2018 3:16 | 3.7 | 20.4 | 3.9 | 2.3 | 0.1233 | 3.9 |
| 4/22/2018 3:17 | 3.2 | 20.5 | 3.9 | 2.3 | 0.1282 | 3.9 |
| 4/22/2018 3:18 | 3.9 | 20.4 | 4   | 2.4 | 0.1152 | 3.8 |
| 4/22/2018 3:19 | 3.1 | 20.2 | 3.9 | 2.4 | 0.1182 | 3.8 |
| 4/22/2018 3:20 | 3.2 | 20.3 | 3.8 | 2.4 | 0.1172 | 3.9 |
| 4/22/2018 3:21 | 3.2 | 20.6 | 3.9 | 2.4 | 0.1151 | 3.9 |
| 4/22/2018 3:22 | 4.3 | 20.3 | 3.9 | 2.4 | 0.1299 | 3.8 |
| 4/22/2018 3:23 | 3.9 | 20.4 | 3.8 | 2.4 | 0.1132 | 3.7 |
| 4/22/2018 3:24 | 3.5 | 20.4 | 3.9 | 2.4 | 0.1179 | 3.7 |
| 4/22/2018 3:25 | 2.3 | 20.2 | 3.9 | 2.4 | 0.1184 | 3.8 |
| 4/22/2018 3:26 | 4.6 | 20.3 | 3.9 | 2.4 | 0.1284 | 3.6 |
| 4/22/2018 3:27 | 4.8 | 20.1 | 3.9 | 2.4 | 0.1273 | 3.7 |
| 4/22/2018 3:28 | 3.8 | 20.5 | 3.9 | 2.4 | 0.1199 | 3.8 |
| 4/22/2018 3:29 | 4.1 | 20.4 | 3.9 | 2.4 | 0.1275 | 3.9 |
| 4/22/2018 3:30 | 3.2 | 20.6 | 3.9 | 2.4 | 0.1122 | 3.9 |
| 4/22/2018 3:31 | 4.3 | 20.2 | 4   | 2.4 | 0.1276 | 3.8 |
| 4/22/2018 3:32 | 3.9 | 20.4 | 4   | 2.4 | 0.1193 | 3.8 |
| 4/22/2018 3:33 | 3   | 20.2 | 4   | 2.4 | 0.1242 | 3.7 |
| 4/22/2018 3:34 | 1.7 | 20   | 4   | 2.4 | 0.1213 | 3.6 |
| 4/22/2018 3:35 | 4.8 | 20.3 | 4   | 2.4 | 0.1177 | 3.7 |
| 4/22/2018 3:36 | 4.4 | 20.2 | 4   | 2.4 | 0.125  | 3.7 |
| 4/22/2018 3:37 | 2.2 | 20.2 | 4.1 | 2.4 | 0.1105 | 3.6 |
| 4/22/2018 3:38 | 2.7 | 20.2 | 4.1 | 2.4 | 0.1276 | 3.5 |
| 4/22/2018 3:39 | 3.3 | 20.3 | 4.1 | 2.4 | 0.1189 | 3.6 |
| 4/22/2018 3:40 | 4.4 | 20.4 | 4.1 | 2.4 | 0.1209 | 3.5 |
| 4/22/2018 3:41 | 3.6 | 20.1 | 4.1 | 2.4 | 0.1219 | 3.5 |
| 4/22/2018 3:42 | 4.2 | 20.1 | 4.1 | 2.4 | 0.1228 | 3.2 |
| 4/22/2018 3:43 | 4.2 | 20.4 | 4.1 | 2.4 | 0.1238 | 2.8 |
| 4/22/2018 3:44 | 4.1 | 20.3 | 4.1 | 2.4 | 0.1203 | 3.1 |
| 4/22/2018 3:45 | 3.5 | 20.1 | 4.1 | 2.4 | 0.1281 | 3.3 |
| 4/22/2018 3:46 | 3.2 | 20.4 | 4.2 | 2.4 | 0.114  | 3.5 |
| 4/22/2018 3:47 | 2.7 | 20.4 | 4.3 | 2.4 | 0.1295 | 3.6 |
| 4/22/2018 3:48 | 4.1 | 20.4 | 4.3 | 2.4 | 0.1171 | 3.7 |
| 4/22/2018 3:49 | 2.9 | 20.3 | 4.3 | 2.4 | 0.1198 | 3.8 |
| 4/22/2018 3:50 | 3.9 | 20.1 | 4.3 | 2.4 | 0.1238 | 3.8 |
| 4/22/2018 3:51 | 3.7 | 20.3 | 4.2 | 2.3 | 0.1085 | 3.8 |
| 4/22/2018 3:52 | 4   | 20.3 | 4.2 | 2.4 | 0.1233 | 3.8 |
| 4/22/2018 3:53 | 3.9 | 20.5 | 4.2 | 2.4 | 0.1127 | 3.8 |
| 4/22/2018 3:54 | 5.1 | 20.4 | 4.1 | 2.4 | 0.1238 | 3.8 |
| 4/22/2018 3:55 | 4.2 | 20.5 | 4.2 | 2.4 | 0.118  | 3.8 |
| 4/22/2018 3:56 | 3.9 | 20.2 | 4.1 | 2.4 | 0.1187 | 3.7 |
| 4/22/2018 3:57 | 3.4 | 20.3 | 4.1 | 2.4 | 0.1237 | 3.2 |
| 4/22/2018 3:58 | 3.6 | 20.2 | 4.1 | 2.4 | 0.1079 | 3.2 |
| 4/22/2018 3:59 | 2.9 | 20.3 | 4.1 | 2.4 | 0.1263 | 3.5 |
| 4/22/2018 4:00 | 3.1 | 20.1 | 4   | 2.4 | 0.1117 | 3.7 |

|                |     |      |     |     |        |     |
|----------------|-----|------|-----|-----|--------|-----|
| 4/22/2018 4:01 | 3.1 | 20.1 | 4   | 2.4 | 0.1289 | 3.7 |
| 4/22/2018 4:02 | 2.6 | 20.2 | 4   | 2.4 | 0.1187 | 3.8 |
| 4/22/2018 4:03 | 3.6 | 20.4 | 4.1 | 2.4 | 0.1334 | 3.9 |
| 4/22/2018 4:04 | 6.3 | 20.2 | 4.1 | 2.4 | 0.1187 | 4   |
| 4/22/2018 4:05 | 4.5 | 20.1 | 4.1 | 2.4 | 0.1173 | 4.1 |
| 4/22/2018 4:06 | 3.8 | 20.2 | 4.1 | 2.4 | 0.1244 | 4.1 |
| 4/22/2018 4:07 | 2.7 | 20.2 | 4.1 | 2.4 | 0.1212 | 4.1 |
| 4/22/2018 4:08 | 4.3 | 20.3 | 4.1 | 2.4 | 0.1187 | 4.1 |
| 4/22/2018 4:09 | 4.6 | 20.6 | 4.1 | 2.4 | 0.1123 | 4.1 |
| 4/22/2018 4:10 | 4   | 20.2 | 4.1 | 2.4 | 0.1292 | 4.1 |
| 4/22/2018 4:11 | 2.3 | 20.4 | 4.1 | 2.4 | 0.1166 | 4.1 |
| 4/22/2018 4:12 | 3.1 | 20.4 | 4.1 | 2.4 | 0.119  | 4.1 |
| 4/22/2018 4:13 | 3.7 | 20.4 | 4.1 | 2.4 | 0.128  | 4.1 |
| 4/22/2018 4:14 | 3.9 | 20.4 | 4   | 2.4 | 0.1114 | 4.1 |
| 4/22/2018 4:15 | 3.6 | 20.4 | 4.1 | 2.3 | 0.1215 | 4.1 |
| 4/22/2018 4:16 | 2.4 | 20.5 | 4   | 2.3 | 0.1214 | 4.1 |
| 4/22/2018 4:17 | 3.1 | 20.5 | 4   | 2.3 | 0.1265 | 4.1 |
| 4/22/2018 4:18 | 3.3 | 20.5 | 4   | 2.3 | 0.1147 | 4.1 |
| 4/22/2018 4:19 | 3.4 | 20.2 | 3.9 | 2.3 | 0.1191 | 4.1 |
| 4/22/2018 4:20 | 4.1 | 20.2 | 3.9 | 2.3 | 0.1172 | 4.1 |
| 4/22/2018 4:21 | 3.2 | 20.2 | 3.9 | 2.3 | 0.1174 | 4.1 |
| 4/22/2018 4:22 | 4.8 | 20.2 | 3.8 | 2.3 | 0.1246 | 4.1 |
| 4/22/2018 4:23 | 4.1 | 20.3 | 3.8 | 2.4 | 0.1148 | 4   |
| 4/22/2018 4:24 | 2.9 | 20.1 | 3.8 | 2.4 | 0.1268 | 4   |
| 4/22/2018 4:25 | 4.6 | 20.3 | 3.8 | 2.4 | 0.1109 | 3.9 |
| 4/22/2018 4:26 | 3.4 | 20.1 | 3.8 | 2.4 | 0.1206 | 3.9 |
| 4/22/2018 4:27 | 4.6 | 20.2 | 3.8 | 2.4 | 0.1113 | 3.9 |
| 4/22/2018 4:28 | 2   | 20.3 | 3.8 | 2.4 | 0.1151 | 3.9 |
| 4/22/2018 4:29 | 3   | 20.7 | 3.8 | 2.4 | 0.1174 | 3.8 |
| 4/22/2018 4:30 | 2.7 | 20.7 | 3.8 | 2.4 | 0.1099 | 3.9 |
| 4/22/2018 4:31 | 4.4 | 20.2 | 3.8 | 2.4 | 0.1271 | 3.9 |
| 4/22/2018 4:32 | 2.9 | 20.3 | 3.8 | 2.4 | 0.1154 | 4.1 |
| 4/22/2018 4:33 | 3.7 | 20.1 | 3.8 | 2.4 | 0.1217 | 4.1 |
| 4/22/2018 4:34 | 1.5 | 20.4 | 3.8 | 2.4 | 0.1202 | 4.1 |
| 4/22/2018 4:35 | 4.2 | 20.4 | 3.8 | 2.4 | 0.1248 | 4   |
| 4/22/2018 4:36 | 3.3 | 20.6 | 3.8 | 2.4 | 0.1234 | 4   |
| 4/22/2018 4:37 | 3.4 | 20.3 | 3.7 | 2.4 | 0.1069 | 4.1 |
| 4/22/2018 4:38 | 3.7 | 20.4 | 3.7 | 2.4 | 0.1189 | 4.1 |
| 4/22/2018 4:39 | 3.3 | 20.5 | 3.7 | 2.4 | 0.1085 | 4   |
| 4/22/2018 4:40 | 4.7 | 20.5 | 3.7 | 2.4 | 0.1074 | 4   |
| 4/22/2018 4:41 | 3.7 | 20.4 | 3.7 | 2.3 | 0.1148 | 4   |
| 4/22/2018 4:42 | 4.1 | 20   | 3.7 | 2.4 | 0.1093 | 4   |
| 4/22/2018 4:43 | 3.4 | 20.4 | 3.7 | 2.4 | 0.1231 | 3.7 |
| 4/22/2018 4:44 | 3.4 | 20.2 | 3.7 | 2.4 | 0.1104 | 3.5 |
| 4/22/2018 4:45 | 3.4 | 20.5 | 3.6 | 2.4 | 0.1209 | 3.7 |
| 4/22/2018 4:46 |     | 20.6 | 3.6 | 2.4 | 0.117  | 3.9 |
| 4/22/2018 4:47 |     | 20.3 | 3.6 | 2.4 | 0.1134 | 3.9 |

|                |     |      |     |     |        |     |
|----------------|-----|------|-----|-----|--------|-----|
| 4/22/2018 4:48 | 7.7 | 20.4 | 3.6 | 2.4 | 0.1178 | 4   |
| 4/22/2018 4:49 |     | 20.4 | 3.6 | 2.4 | 0.103  | 4.1 |
| 4/22/2018 4:50 | 6.8 | 20.2 | 3.6 | 2.4 | 0.1218 | 4.2 |
| 4/22/2018 4:51 |     | 20.3 | 3.6 | 2.4 | 0.1102 | 4.3 |
| 4/22/2018 4:52 | 4.2 | 20.2 | 3.6 | 2.4 | 0.1253 | 4.3 |
| 4/22/2018 4:53 | 4.4 | 20.3 | 3.6 | 2.4 | 0.1086 | 4.4 |
| 4/22/2018 4:54 |     | 20   | 3.6 | 2.4 | 0.1152 | 4.4 |
| 4/22/2018 4:55 | 4   | 20.1 | 3.6 | 2.4 | 0.1179 | 4.4 |
| 4/22/2018 4:56 |     | 20.3 | 3.6 | 2.4 | 0.1148 | 4.4 |
| 4/22/2018 4:57 |     | 20.2 | 3.7 | 2.4 | 0.1272 | 4.1 |
| 4/22/2018 4:58 | 4.3 | 20.5 | 3.7 | 2.4 | 0.1063 | 4.3 |
| 4/22/2018 4:59 | 2.1 | 20.4 | 3.7 | 2.3 | 0.1135 | 4.4 |
| 4/22/2018 5:00 |     | 20.5 | 3.7 | 2.3 | 0.1086 | 4.4 |
| 4/22/2018 5:01 |     | 20.4 | 3.7 | 2.3 | 0.1171 | 4.4 |
| 4/22/2018 5:02 | 2.7 | 20.4 | 3.6 | 2.3 | 0.1205 | 4.4 |
| 4/22/2018 5:03 | 4   | 20.2 | 3.6 | 2.3 | 0.1116 | 4.5 |
| 4/22/2018 5:04 | 2.9 | 20.3 | 3.6 | 2.3 | 0.1234 | 4.5 |
| 4/22/2018 5:05 | 4.3 | 20.3 | 3.6 | 2.3 | 0.1073 | 4.5 |
| 4/22/2018 5:06 | 3.9 | 20.3 | 3.6 | 2.3 | 0.117  | 4.4 |
| 4/22/2018 5:07 | 2.7 | 20.4 | 3.6 | 2.3 | 0.1112 | 4.4 |
| 4/22/2018 5:08 | 3.7 | 20.4 | 3.5 | 2.3 | 0.1113 | 4.1 |
| 4/22/2018 5:09 | 3.4 | 20.3 | 3.5 | 2.3 | 0.1141 | 2.4 |
| 4/22/2018 5:10 | 3.2 | 20   | 3.5 | 2.3 | 0.1071 | 2.3 |
| 4/22/2018 5:11 | 3.6 | 20.2 | 3.5 | 2.3 | 0.1193 | 2.5 |
| 4/22/2018 5:12 | 2.5 | 20.2 | 3.5 | 2.3 | 0.1043 | 2.9 |
| 4/22/2018 5:13 | 3.5 | 20.1 | 3.5 | 2.4 | 0.1203 | 3.3 |
| 4/22/2018 5:14 | 2.7 | 20.2 | 3.5 | 2.4 | 0.1099 | 3   |
| 4/22/2018 5:15 | 2.9 | 20.5 | 3.5 | 2.4 | 0.1199 | 2.3 |
| 4/22/2018 5:16 | 2.5 | 20.2 | 3.5 | 2.4 | 0.117  | 2.1 |
| 4/22/2018 5:17 | 4.3 | 20.3 | 3.6 | 2.4 | 0.1093 | 2.3 |
| 4/22/2018 5:18 | 2.5 | 19.9 | 3.6 | 2.4 | 0.1087 | 2.2 |
| 4/22/2018 5:19 | 3.4 | 20.1 | 3.5 | 2.4 | 0.1059 | 2.1 |
| 4/22/2018 5:20 | 5.8 | 20.3 | 3.6 | 2.4 | 0.1165 | 2.3 |
| 4/22/2018 5:21 | 3.1 | 20.1 | 3.6 | 2.4 | 0.1128 | 2.6 |
| 4/22/2018 5:22 | 3.6 | 20   | 3.5 | 2.3 | 0.118  | 2.6 |
| 4/22/2018 5:23 | 3.2 | 20.3 | 3.5 | 2.3 | 0.1167 | 2.1 |
| 4/22/2018 5:24 | 4.4 | 20   | 3.6 | 2.3 | 0.1067 | 2.5 |
| 4/22/2018 5:25 | 2.9 | 20.2 | 3.6 | 2.3 | 0.1198 | 2.9 |
| 4/22/2018 5:26 | 3.4 | 20   | 3.6 | 2.3 | 0.1017 | 3.1 |
| 4/22/2018 5:27 | 3.1 | 20.2 | 3.5 | 2.3 | 0.1225 | 3.4 |
| 4/22/2018 5:28 | 3.1 | 20.2 | 3.5 | 2.3 | 0.111  | 3.6 |
| 4/22/2018 5:29 | 4   | 20.1 | 3.5 | 2.3 | 0.1139 | 3.7 |
| 4/22/2018 5:30 | 2.7 | 20.2 | 3.4 | 2.3 | 0.1205 | 3.9 |
| 4/22/2018 5:31 | 4.6 | 20.2 | 3.4 | 2.3 | 0.1082 | 4   |
| 4/22/2018 5:32 | 4.3 | 20   | 3.4 | 2.3 | 0.1187 | 4   |
| 4/22/2018 5:33 | 4.8 | 20   | 3.4 | 2.3 | 0.1049 | 4   |
| 4/22/2018 5:34 | 3.1 | 20.1 | 3.5 | 2.4 | 0.1171 | 4.1 |

|                |     |      |     |     |        |     |
|----------------|-----|------|-----|-----|--------|-----|
| 4/22/2018 5:35 | 3.4 | 19.9 | 3.6 | 2.4 | 0.1065 | 4.1 |
| 4/22/2018 5:36 | 5.1 | 20.2 | 3.6 | 2.4 | 0.119  | 3.9 |
| 4/22/2018 5:37 | 2.7 | 20   | 3.6 | 2.3 | 0.1186 | 3.4 |
| 4/22/2018 5:38 | 1.9 | 20.2 | 3.6 | 2.3 | 0.1075 | 3.4 |
| 4/22/2018 5:39 | 4.3 | 20.2 | 3.5 | 2.3 | 0.1221 | 3.8 |
| 4/22/2018 5:40 | 4.6 | 20.2 | 3.6 | 2.3 | 0.1052 | 4.2 |
| 4/22/2018 5:41 | 3.4 | 20   | 3.7 | 2.3 | 0.1127 | 4.1 |
| 4/22/2018 5:42 | 4.2 | 20.1 | 3.7 | 2.3 | 0.1092 | 4   |
| 4/22/2018 5:43 | 3.2 | 20.2 | 3.7 | 2.3 | 0.1164 | 4.1 |
| 4/22/2018 5:44 | 4.5 | 20   | 3.6 | 2.3 | 0.1177 | 4.3 |
| 4/22/2018 5:45 | 3   | 19.9 | 3.7 | 2.3 | 0.1043 | 4.3 |
| 4/22/2018 5:46 | 3.3 | 20.3 | 3.7 | 2.3 | 0.1223 | 4.1 |
| 4/22/2018 5:47 | 3.2 | 20   | 3.7 | 2.3 | 0.1019 | 4.2 |
| 4/22/2018 5:48 | 3.7 | 20.2 | 3.5 | 2.3 | 0.1188 | 4.3 |
| 4/22/2018 5:49 | 3.3 | 20   | 3.5 | 2.3 | 0.1069 | 4.4 |
| 4/22/2018 5:50 | 3.4 | 19.9 | 3.5 | 2.3 | 0.1148 | 4.5 |
| 4/22/2018 5:51 | 3.6 | 20   | 3.5 | 2.3 | 0.1079 | 4.5 |
| 4/22/2018 5:52 | 3   | 20.1 | 3.5 | 2.3 | 0.1102 | 4.5 |
| 4/22/2018 5:53 | 3.1 | 20   | 3.5 | 2.3 | 0.1205 | 4.6 |
| 4/22/2018 5:54 | 2.1 | 19.8 | 3.6 | 2.4 | 0.1057 | 4.6 |
| 4/22/2018 5:55 | 4.1 | 20   | 3.7 | 2.4 | 0.1117 | 4.6 |
| 4/22/2018 5:56 | 2.9 | 20   | 4   | 2.3 | 0.1136 | 4.6 |
| 4/22/2018 5:57 | 3.6 | 20   | 4   | 2.3 | 0.1122 | 4.6 |
| 4/22/2018 5:58 | 2.4 | 19.8 | 3.8 | 2.3 | 0.1187 | 4.6 |
| 4/22/2018 5:59 | 4.2 | 20   | 3.8 | 2.3 | 0.1079 | 4.7 |
| 4/22/2018 6:00 | 2.6 | 20.1 | 4   | 2.3 | 0.1192 | 4.7 |
| 4/22/2018 6:01 | 4.6 | 20.1 | 3.9 | 2.3 | 0.1029 | 4.8 |
| 4/22/2018 6:02 | 2.6 | 20   | 4   | 2.3 | 0.1151 | 4.8 |
| 4/22/2018 6:03 | 3.3 | 19.9 | 4.1 | 2.3 | 0.1148 | 4.7 |
| 4/22/2018 6:04 | 2.2 | 19.8 | 4   | 2.3 | 0.1139 | 4.8 |
| 4/22/2018 6:05 | 4.8 | 20   | 4.1 | 2.4 | 0.1095 | 4.7 |
| 4/22/2018 6:06 | 3.5 | 19.7 | 4.3 | 2.3 | 0.107  | 4.7 |
| 4/22/2018 6:07 | 2.5 | 20   | 4.2 | 2.3 | 0.1236 | 4.8 |
| 4/22/2018 6:08 | 3   | 19.8 | 4   | 2.4 | 0.1078 | 4.8 |
| 4/22/2018 6:09 | 2.5 | 20   | 3.9 | 2.4 | 0.1188 | 4.7 |
| 4/22/2018 6:10 | 3.5 | 19.8 | 3.8 | 2.4 | 0.1116 | 4.7 |
| 4/22/2018 6:11 | 3.3 | 19.7 | 3.9 | 2.4 | 0.114  | 4.8 |
| 4/22/2018 6:12 | 3.7 | 19.6 | 4.2 | 2.4 | 0.1192 | 4.8 |
| 4/22/2018 6:13 | 4.1 | 19.9 | 4.2 | 2.4 | 0.1079 | 4.8 |
| 4/22/2018 6:14 | 3   | 19.6 | 4.3 | 2.4 | 0.1229 | 4.8 |
| 4/22/2018 6:15 | 3.3 | 19.8 | 4.2 | 2.4 | 0.1087 | 4.8 |
| 4/22/2018 6:16 | 3.5 | 19.8 | 4.4 | 2.4 | 0.1169 | 4.8 |
| 4/22/2018 6:17 | 4   | 19.7 | 4.5 | 2.4 | 0.118  | 4.8 |
| 4/22/2018 6:18 | 3.5 | 19.8 | 4.5 | 2.3 | 0.115  | 4.6 |
| 4/22/2018 6:19 | 3.8 | 19.7 | 4.7 | 2.3 | 0.1194 | 3.5 |
| 4/22/2018 6:20 | 2.6 | 19.9 | 4.5 | 2.3 | 0.1122 | 2.8 |
| 4/22/2018 6:21 | 4.2 | 19.6 | 4.8 | 2.4 | 0.1284 | 3.1 |



|                |     |      |     |     |        |     |
|----------------|-----|------|-----|-----|--------|-----|
| 4/22/2018 6:22 | 2.5 | 19.6 | 4.9 | 2.3 | 0.1151 | 3.6 |
| 4/22/2018 6:23 | 3.8 | 19.5 | 4.4 | 2.4 | 0.1214 | 3.9 |
| 4/22/2018 6:24 | 2.8 | 19.5 | 4.8 | 2.4 | 0.1074 | 4.1 |
| 4/22/2018 6:25 | 2.7 | 19.6 | 4.6 | 2.4 | 0.1181 | 4.3 |
| 4/22/2018 6:26 | 2.7 | 19.4 | 4.5 | 2.4 | 0.1217 | 4.3 |
| 4/22/2018 6:27 | 3.9 | 19.9 | 4.6 | 2.4 | 0.1049 | 4.4 |
| 4/22/2018 6:28 | 3.2 | 19.9 | 4.4 | 2.4 | 0.1162 | 4.5 |
| 4/22/2018 6:29 | 2.7 | 19.7 | 4.4 | 2.4 | 0.1131 | 4.6 |
| 4/22/2018 6:30 | 2.6 | 19.8 | 4.6 | 2.5 | 0.124  | 4.7 |
| 4/22/2018 6:31 | 2.9 | 19.5 | 4.9 | 2.5 | 0.1223 | 4.8 |
| 4/22/2018 6:32 | 2.5 | 20   | 4.9 | 2.5 | 0.114  | 4.9 |
| 4/22/2018 6:33 | 3.9 | 19.8 | 4.9 | 2.5 | 0.1279 | 4.9 |
| 4/22/2018 6:34 | 3.1 | 19.9 | 5   | 2.4 | 0.1149 | 4.9 |
| 4/22/2018 6:35 | 2.9 | 19.6 | 5.1 | 2.4 | 0.1206 | 4.9 |
| 4/22/2018 6:36 | 5.1 | 19.9 | 5.1 | 2.4 | 0.1193 | 4.9 |
| 4/22/2018 6:37 | 4.2 | 19.7 | 4.8 | 2.4 | 0.1159 | 4.8 |
| 4/22/2018 6:38 | 4.5 | 19.6 | 4.8 | 2.4 | 0.1179 | 4.7 |
| 4/22/2018 6:39 | 4.1 | 19.8 | 4.9 | 2.4 | 0.1111 | 4.7 |
| 4/22/2018 6:40 | 3.7 | 19.8 | 4.9 | 2.4 | 0.1181 | 4.7 |
| 4/22/2018 6:41 | 3.4 | 19.7 | 4.8 | 2.4 | 0.1113 | 4.6 |
| 4/22/2018 6:42 | 3.7 | 19.4 | 5   | 2.4 | 0.1152 | 4.4 |
| 4/22/2018 6:43 | 3.1 | 20   | 5   | 2.4 | 0.1218 | 3.6 |
| 4/22/2018 6:44 | 4.6 | 19.8 | 5   | 2.5 | 0.1084 | 4   |
| 4/22/2018 6:45 | 2.7 | 19.9 | 4.8 | 2.5 | 0.1162 | 4.5 |
| 4/22/2018 6:46 | 4.6 | 19.8 | 4.6 | 2.5 | 0.1158 | 4.7 |
| 4/22/2018 6:47 | 4   | 19.9 | 4.7 | 2.5 | 0.1223 | 4.7 |
| 4/22/2018 6:48 | 3.9 | 19.7 | 4.9 | 2.5 | 0.1155 | 4.7 |
| 4/22/2018 6:49 | 3.7 | 19.7 | 4.9 | 2.5 | 0.1104 | 4.7 |
| 4/22/2018 6:50 | 2.8 | 19.5 | 5   | 2.5 | 0.123  | 4.7 |
| 4/22/2018 6:51 | 2.5 | 19.7 | 4.9 | 2.5 | 0.1102 | 4.8 |
| 4/22/2018 6:52 | 4.5 | 19.8 | 5   | 2.5 | 0.1224 | 4.8 |
| 4/22/2018 6:53 | 4.5 | 19.8 | 5.2 | 2.4 | 0.1164 | 4.8 |
| 4/22/2018 6:54 | 3.4 | 20.2 | 5.1 | 2.4 | 0.1182 | 4.8 |
| 4/22/2018 6:55 | 3.6 | 19.7 | 5.1 | 2.4 | 0.124  | 4.6 |
| 4/22/2018 6:56 | 3.6 | 19.9 | 4.9 | 2.4 | 0.1181 | 4   |
| 4/22/2018 6:57 | 2.3 | 19.8 | 5.1 | 2.4 | 0.118  | 4.2 |
| 4/22/2018 6:58 | 3.4 | 19.9 | 5.2 | 2.4 | 0.1068 | 3.6 |
| 4/22/2018 6:59 | 4   | 19.9 | 5.1 | 2.4 | 0.1203 | 3   |
| 4/22/2018 7:00 | 4.2 | 20.2 | 5.2 | 2.4 | 0.1182 | 3.5 |
| 4/22/2018 7:01 | 3.3 | 19.7 | 5.1 | 2.4 | 0.1138 | 3.7 |
| 4/22/2018 7:02 | 3.7 | 19.9 | 4.9 | 2.5 | 0.1208 | 4.1 |
| 4/22/2018 7:03 | 2.6 | 19.7 | 4.9 | 2.4 | 0.1131 | 4.3 |
| 4/22/2018 7:04 | 4.8 | 19.8 | 4.9 | 2.4 | 0.1291 | 4.5 |
| 4/22/2018 7:05 | 2.9 | 20.1 | 5   | 2.4 | 0.114  | 4.6 |
| 4/22/2018 7:06 | 4   | 20   | 5.2 | 2.4 | 0.1137 | 4.7 |
| 4/22/2018 7:07 | 2.8 | 20   | 5.1 | 2.4 | 0.11   | 4.8 |
| 4/22/2018 7:08 | 4.1 | 19.8 | 5   | 2.4 | 0.1205 | 4.8 |

|                |     |      |     |     |        |     |
|----------------|-----|------|-----|-----|--------|-----|
| 4/22/2018 7:09 | 3.8 | 19.9 | 5.1 | 2.5 | 0.1202 | 4.5 |
| 4/22/2018 7:10 | 3   | 19.9 | 5.1 | 2.5 | 0.1126 | 4.1 |
| 4/22/2018 7:11 | 2.7 | 19.7 | 5.3 | 2.5 | 0.1242 | 4.2 |
| 4/22/2018 7:12 | 2.5 | 19.7 | 5.2 | 2.5 | 0.108  | 4.4 |
| 4/22/2018 7:13 | 3.2 | 20   | 5.2 | 2.5 | 0.1219 | 4.3 |
| 4/22/2018 7:14 | 2.3 | 20.1 | 5.1 | 2.5 | 0.1134 | 4.4 |
| 4/22/2018 7:15 | 4.1 | 19.7 | 5.1 | 2.5 | 0.1088 | 4.5 |
| 4/22/2018 7:16 | 4.7 | 19.9 | 5.3 | 2.5 | 0.1188 | 4.6 |
| 4/22/2018 7:17 | 2.9 | 20   | 5.4 | 2.4 | 0.1106 | 4.5 |
| 4/22/2018 7:18 | 4   | 20.1 | 5.2 | 2.4 | 0.1224 | 4.5 |
| 4/22/2018 7:19 | 3.6 | 19.9 | 5.1 | 2.4 | 0.1111 | 4.4 |
| 4/22/2018 7:20 | 4.4 | 19.8 | 5.1 | 2.4 | 0.1174 | 3.8 |
| 4/22/2018 7:21 | 4.5 | 20   | 5.3 | 2.4 | 0.117  | 3   |
| 4/22/2018 7:22 | 2   | 19.9 | 5.1 | 2.4 | 0.1153 | 3.8 |
| 4/22/2018 7:23 | 3   | 20   | 5   | 2.4 | 0.1235 | 4.1 |
| 4/22/2018 7:24 | 2.2 | 20   | 5.1 | 2.4 | 0.1067 | 4.3 |
| 4/22/2018 7:25 | 3.3 | 19.7 | 5.2 | 2.4 | 0.1217 | 4.3 |
| 4/22/2018 7:26 | 2.3 | 19.7 | 5.2 | 2.4 | 0.1177 | 4.2 |
| 4/22/2018 7:27 | 2.4 | 19.6 | 5.1 | 2.5 | 0.1113 | 4.4 |
| 4/22/2018 7:28 | 3.4 | 19.8 | 5.1 | 2.5 | 0.1205 | 4.6 |
| 4/22/2018 7:29 | 2.7 | 19.9 | 5.4 | 2.5 | 0.1047 | 4.7 |
| 4/22/2018 7:30 | 4.3 | 19.5 | 5.3 | 2.5 | 0.1196 | 4.7 |
| 4/22/2018 7:31 | 3.6 | 19.6 | 5.5 | 2.5 | 0.1094 | 4.8 |
| 4/22/2018 7:32 | 4.4 | 19.9 | 5.2 | 2.5 | 0.1123 | 4.8 |
| 4/22/2018 7:33 | 2.7 | 19.8 | 5.4 | 2.5 | 0.1215 | 4.8 |
| 4/22/2018 7:34 | 2.8 | 19.8 | 5.3 | 2.5 | 0.1117 | 4.8 |
| 4/22/2018 7:35 | 4.5 | 19.8 | 5.7 | 2.4 | 0.1276 | 4.7 |
| 4/22/2018 7:36 | 3.5 | 19.9 | 5.2 | 2.4 | 0.1081 | 4.8 |
| 4/22/2018 7:37 | 3.8 | 19.9 | 5.4 | 2.4 | 0.1175 | 4.7 |
| 4/22/2018 7:38 | 2.3 | 19.7 | 5.3 | 2.4 | 0.1178 | 4.7 |
| 4/22/2018 7:39 | 1.9 | 19.6 | 5.1 | 2.4 | 0.1091 | 4.7 |
| 4/22/2018 7:40 | 3.6 | 19.7 | 5   | 2.4 | 0.1153 | 4.3 |
| 4/22/2018 7:41 | 3.1 | 19.7 | 5.2 | 2.4 | 0.1087 | 4.4 |
| 4/22/2018 7:42 | 2.3 | 19.7 | 5.4 | 2.4 | 0.1181 | 4.6 |
| 4/22/2018 7:43 | 3.3 | 20   | 5.3 | 2.5 | 0.1058 | 4.6 |
| 4/22/2018 7:44 | 3.1 | 19.6 | 5.2 | 2.5 | 0.1135 | 4.6 |
| 4/22/2018 7:45 | 3.2 | 19.8 | 5.2 | 2.5 | 0.1173 | 4.8 |
| 4/22/2018 7:46 | 3.4 | 19.5 | 5.2 | 2.5 | 0.1074 | 4.7 |
| 4/22/2018 7:47 | 3.2 | 19.8 | 5.4 | 2.5 | 0.1186 | 4.9 |
| 4/22/2018 7:48 | 2.9 | 19.9 | 5.3 | 2.5 | 0.1083 | 4.8 |
| 4/22/2018 7:49 | 3.7 | 19.8 | 5.5 | 2.5 | 0.1258 | 4.8 |
| 4/22/2018 7:50 | 3.4 | 19.6 | 5.7 | 2.5 | 0.1098 | 4.8 |
| 4/22/2018 7:51 | 3.3 | 19.7 | 5.7 | 2.5 | 0.1189 | 4.5 |
| 4/22/2018 7:52 | 2.5 | 19.6 | 5.5 | 2.5 | 0.1236 | 4.6 |
| 4/22/2018 7:53 | 4   | 19.6 | 5.4 | 2.5 | 0.1138 | 4.9 |
| 4/22/2018 7:54 | 2.6 | 19.6 | 5.6 | 2.5 | 0.1224 | 4.9 |
| 4/22/2018 7:55 | 3.7 | 19.8 | 5.8 | 2.5 | 0.1093 | 5   |

|                |     |      |     |     |        |     |
|----------------|-----|------|-----|-----|--------|-----|
| 4/22/2018 7:56 | 3.3 | 19.7 | 5.8 | 2.5 | 0.1142 | 5   |
| 4/22/2018 7:57 | 3.1 | 19.8 | 5.7 | 2.5 | 0.1098 | 5.1 |
| 4/22/2018 7:58 | 3.3 | 19.8 | 5.6 | 2.5 | 0.1197 | 5.2 |
| 4/22/2018 7:59 | 2.8 | 19.7 | 5.7 | 2.5 | 0.115  | 5.2 |
| 4/22/2018 8:00 | 3.6 | 19.8 | 5.6 | 2.5 | 0.1132 | 5.2 |
| 4/22/2018 8:01 | 4.4 | 19.7 | 5.3 | 2.5 | 0.1238 | 5.1 |
| 4/22/2018 8:02 |     | 19.7 | 5.4 | 2.5 | 0.1062 | 5.1 |
| 4/22/2018 8:03 |     | 19.9 | 5.6 | 2.5 | 0.1258 | 5   |
| 4/22/2018 8:04 |     | 19.8 | 5.6 | 2.5 | 0.1124 | 5   |
| 4/22/2018 8:05 | 2.4 | 19.6 | 5.4 | 2.5 | 0.1157 | 4.8 |
| 4/22/2018 8:06 | 4.7 | 19.5 | 5.6 | 2.6 | 0.1229 | 4.9 |
| 4/22/2018 8:07 |     | 19.8 | 5.7 | 2.6 | 0.1091 | 5   |
| 4/22/2018 8:08 | 0.8 | 19.7 | 5.7 | 2.6 | 0.1159 | 5   |
| 4/22/2018 8:09 |     | 19.8 | 5.9 | 2.5 | 0.1114 | 5   |
| 4/22/2018 8:10 | 4.2 | 19.8 | 5.9 | 2.5 | 0.1249 | 4.9 |
| 4/22/2018 8:11 | 3.1 | 19.9 | 5.9 | 2.5 | 0.1241 | 5   |
| 4/22/2018 8:12 |     | 19.5 | 5.7 | 2.5 | 0.1173 | 5   |
| 4/22/2018 8:13 |     | 19.8 | 5.7 | 2.5 | 0.1224 | 5.1 |
| 4/22/2018 8:14 | 3.2 | 19.8 | 5.7 | 2.5 | 0.109  | 5.1 |
| 4/22/2018 8:15 | 2.8 | 19.6 | 5.6 | 2.5 | 0.1208 | 4.9 |
| 4/22/2018 8:16 | 3.5 | 19.6 | 5.6 | 2.5 | 0.1104 | 4.2 |
| 4/22/2018 8:17 | 7   | 19.5 | 5.5 | 2.5 | 0.1159 | 3.4 |
| 4/22/2018 8:18 | 3.3 | 19.6 | 5.6 | 2.5 | 0.1228 | 3.8 |
| 4/22/2018 8:19 | 4.3 | 19.7 | 5.5 | 2.5 | 0.1148 | 4.2 |
| 4/22/2018 8:20 | 3.8 | 19.7 | 5.5 | 2.6 | 0.1214 | 4.4 |
| 4/22/2018 8:21 | 2.3 | 19.4 | 5.5 | 2.5 | 0.1066 | 4.6 |
| 4/22/2018 8:22 | 4   | 19.7 | 5.8 | 2.5 | 0.1257 | 4.7 |
| 4/22/2018 8:23 | 3   | 19.8 | 5.7 | 2.5 | 0.1203 | 4.7 |
| 4/22/2018 8:24 | 4.5 | 19.8 | 5.7 | 2.5 | 0.1201 | 4.8 |
| 4/22/2018 8:25 | 3.8 | 19.8 | 5.5 | 2.5 | 0.1277 | 4.8 |
| 4/22/2018 8:26 | 2.7 | 19.7 | 5.4 | 2.5 | 0.108  | 4.8 |
| 4/22/2018 8:27 | 1.8 | 19.8 | 5.5 | 2.5 | 0.122  | 4.8 |
| 4/22/2018 8:28 | 3.1 | 19.7 | 5.4 | 2.6 | 0.1033 | 4.9 |
| 4/22/2018 8:29 | 2.9 | 19.6 | 5.5 | 2.6 | 0.1281 | 4.9 |
| 4/22/2018 8:30 | 1.2 | 19.8 | 5.5 | 2.6 | 0.1139 | 5   |
| 4/22/2018 8:31 | 1.7 | 19.6 | 5.4 | 2.6 | 0.1206 | 5   |
| 4/22/2018 8:32 | 3.1 | 19.7 | 5.5 | 2.7 | 0.1258 | 5   |
| 4/22/2018 8:33 | 3.1 | 19.7 | 5.8 | 2.6 | 0.1163 | 5.1 |
| 4/22/2018 8:34 | 4   | 19.7 | 5.9 | 2.6 | 0.1308 | 5.1 |
| 4/22/2018 8:35 | 2.6 | 19.6 | 5.9 | 2.6 | 0.1088 | 5.2 |
| 4/22/2018 8:36 | 4.7 | 19.6 | 5.6 | 2.6 | 0.1229 | 5.1 |
| 4/22/2018 8:37 | 3.2 | 19.4 | 5.7 | 2.6 | 0.1191 | 5.2 |
| 4/22/2018 8:38 | 4.5 | 19.7 | 5.8 | 2.6 | 0.1113 | 5.1 |
| 4/22/2018 8:39 | 4.5 | 19.6 | 5.8 | 2.6 | 0.115  | 5.2 |
| 4/22/2018 8:40 | 2.2 | 19.7 | 5.8 | 2.6 | 0.1174 | 5.2 |
| 4/22/2018 8:41 | 3.5 | 19.5 | 6   | 2.6 | 0.1186 | 5.2 |
| 4/22/2018 8:42 | 3.4 | 19.7 | 5.7 | 2.6 | 0.1084 | 5.3 |

|                |     |      |     |     |        |     |
|----------------|-----|------|-----|-----|--------|-----|
| 4/22/2018 8:43 | 2.8 | 19.8 | 5.9 | 2.6 | 0.1231 | 5.2 |
| 4/22/2018 8:44 | 4   | 19.7 | 5.7 | 2.6 | 0.1166 | 5.2 |
| 4/22/2018 8:45 | 2.8 | 19.4 | 5.7 | 2.6 | 0.1222 | 5.3 |
| 4/22/2018 8:46 | 4   | 19.6 | 5.7 | 2.6 | 0.1176 | 5.3 |
| 4/22/2018 8:47 | 3.7 | 19.7 | 5.8 | 2.6 | 0.1112 | 5.3 |
| 4/22/2018 8:48 | 3.5 | 19.5 | 5.7 | 2.6 | 0.1244 | 5.2 |
| 4/22/2018 8:49 | 1.7 | 19.7 | 5.6 | 2.6 | 0.1198 | 5.2 |
| 4/22/2018 8:50 | 3   | 19.4 | 5.6 | 2.6 | 0.1185 | 5   |
| 4/22/2018 8:51 | 3.8 | 19.5 | 5.8 | 2.6 | 0.1243 | 5   |
| 4/22/2018 8:52 | 2.9 | 19.4 | 5.8 | 2.6 | 0.1139 | 5.1 |
| 4/22/2018 8:53 | 4   | 19.6 | 5.7 | 2.6 | 0.1326 | 5.2 |
| 4/22/2018 8:54 | 2.8 | 19.5 | 5.7 | 2.6 | 0.1088 | 5.3 |
| 4/22/2018 8:55 | 3.9 | 19.7 | 5.7 | 2.6 | 0.1236 | 5.3 |
| 4/22/2018 8:56 | 3.6 | 19.8 | 5.7 | 2.6 | 0.1128 | 5.3 |
| 4/22/2018 8:57 | 1.2 | 19.5 | 5.6 | 2.7 | 0.1216 | 5.3 |
| 4/22/2018 8:58 | 4.1 | 19.7 | 5.7 | 2.7 | 0.1225 | 5.2 |
| 4/22/2018 8:59 | 3.7 | 19.7 | 5.8 | 2.7 | 0.1134 | 5.2 |
| 4/22/2018 9:00 | 4.2 | 19.7 | 5.8 | 2.7 | 0.1256 | 5.1 |
| 4/22/2018 9:01 | 4   | 19.6 | 6.1 | 2.7 | 0.1129 | 5.1 |
| 4/22/2018 9:02 | 3.8 | 19.6 | 6.1 | 2.6 | 0.1254 | 4.9 |
| 4/22/2018 9:03 | 2.7 | 19.8 | 6   | 2.6 | 0.1188 | 4.8 |
| 4/22/2018 9:04 | 4   | 19.8 | 6   | 2.6 | 0.1218 | 4.7 |
| 4/22/2018 9:05 | 3.2 | 19.9 | 6.2 | 2.6 | 0.1267 | 4.6 |
| 4/22/2018 9:06 | 2.4 | 19.9 | 6   | 2.6 | 0.116  | 4.5 |
| 4/22/2018 9:07 | 1.9 | 19.7 | 5.9 | 2.6 | 0.1311 | 4.6 |
| 4/22/2018 9:08 | 2.8 | 19.8 | 5.9 | 2.6 | 0.1148 | 4.5 |
| 4/22/2018 9:09 | 3.8 | 19.7 | 5.8 | 2.6 | 0.1269 | 4.3 |
| 4/22/2018 9:10 | 3.1 | 19.6 | 5.8 | 2.6 | 0.1143 | 4.2 |
| 4/22/2018 9:11 | 3.5 | 19.8 | 5.8 | 2.6 | 0.1248 | 4.1 |
| 4/22/2018 9:12 | 4.7 | 19.7 | 5.7 | 2.6 | 0.1209 | 2.2 |
| 4/22/2018 9:13 | 3.9 | 19.8 | 5.8 | 2.6 | 0.1184 | 1.5 |
| 4/22/2018 9:14 | 2.9 | 19.9 | 5.8 | 2.6 | 0.1259 | 1.5 |
| 4/22/2018 9:15 | 3.5 | 19.9 | 5.8 | 2.6 | 0.1161 | 1.5 |
| 4/22/2018 9:16 | 3.3 | 19.9 | 5.8 | 2.6 | 0.128  | 1.5 |
| 4/22/2018 9:17 | 3.8 | 19.8 | 5.6 | 2.6 | 0.1153 | 1.5 |
| 4/22/2018 9:18 | 3.9 | 19.6 | 5.6 | 2.6 | 0.1195 | 1.6 |
| 4/22/2018 9:19 | 2.2 | 19.8 | 5.7 | 2.6 | 0.1259 | 1.6 |
| 4/22/2018 9:20 | 2.6 | 19.8 | 5.7 | 2.6 | 0.1144 | 1.6 |
| 4/22/2018 9:21 | 2.3 | 19.8 | 5.6 | 2.6 | 0.1314 | 1.6 |
| 4/22/2018 9:22 | 3.4 | 19.6 | 5.6 | 2.6 | 0.1149 | 1.6 |
| 4/22/2018 9:23 | 3.2 | 19.8 | 5.6 | 2.6 | 0.1225 | 1.6 |
| 4/22/2018 9:24 | 3   | 19.9 | 5.6 | 2.7 | 0.1279 | 1.8 |
| 4/22/2018 9:25 | 3.8 | 19.8 | 5.6 | 2.7 | 0.1139 | 2   |
| 4/22/2018 9:26 | 2.5 | 20   | 5.5 | 2.7 | 0.1328 | 2   |
| 4/22/2018 9:27 | 1.9 | 20   | 5.6 | 2.7 | 0.1191 | 1.9 |
| 4/22/2018 9:28 | 3.7 | 19.9 | 5.6 | 2.7 | 0.1259 | 1.7 |
| 4/22/2018 9:29 | 2.3 | 20   | 5.5 | 2.7 | 0.1235 | 2   |

|                 |     |      |     |     |        |     |
|-----------------|-----|------|-----|-----|--------|-----|
| 4/22/2018 9:30  | 3.7 | 20.1 | 5.5 | 2.7 | 0.1265 | 2.1 |
| 4/22/2018 9:31  | 4   | 19.7 | 5.5 | 2.6 | 0.1231 | 2.1 |
| 4/22/2018 9:32  | 4   | 20.1 | 5.4 | 2.6 | 0.12   | 2.2 |
| 4/22/2018 9:33  | 3.2 | 20.2 | 5.5 | 2.6 | 0.1326 | 2.3 |
| 4/22/2018 9:34  | 4.3 | 19.9 | 5.4 | 2.6 | 0.1171 | 2.4 |
| 4/22/2018 9:35  | 3.4 | 20   | 5.4 | 2.6 | 0.1333 | 2.5 |
| 4/22/2018 9:36  | 3   | 20.1 | 5.3 | 2.6 | 0.1238 | 2.8 |
| 4/22/2018 9:37  | 3.4 | 20   | 5.3 | 2.6 | 0.1219 | 3.1 |
| 4/22/2018 9:38  | 3   | 19.9 | 5.3 | 2.5 | 0.128  | 3.2 |
| 4/22/2018 9:39  | 4   | 20   | 5.3 | 2.6 | 0.1204 | 3   |
| 4/22/2018 9:40  | 3.6 | 20   | 5.3 | 2.6 | 0.1301 | 3   |
| 4/22/2018 9:41  | 3.7 | 20   | 5.3 | 2.6 | 0.1205 | 3.2 |
| 4/22/2018 9:42  | 3.1 | 19.9 | 5.3 | 2.6 | 0.133  | 3.4 |
| 4/22/2018 9:43  | 2.9 | 19.8 | 5.2 | 2.6 | 0.1158 | 3.6 |
| 4/22/2018 9:44  | 3.4 | 19.9 | 5.2 | 2.6 | 0.1203 | 3.7 |
| 4/22/2018 9:45  | 4   | 20.1 | 5.2 | 2.6 | 0.1195 | 3.8 |
| 4/22/2018 9:46  | 3.8 | 19.6 | 5.2 | 2.6 | 0.1223 | 3.5 |
| 4/22/2018 9:47  | 2.9 | 19.8 | 5.2 | 2.6 | 0.1292 | 2.2 |
| 4/22/2018 9:48  | 4.1 | 19.9 | 5.2 | 2.6 | 0.1093 | 2.3 |
| 4/22/2018 9:49  | 2.9 | 20.1 | 5.2 | 2.6 | 0.1275 | 2.6 |
| 4/22/2018 9:50  | 2.5 | 20   | 5.2 | 2.6 | 0.117  | 2.8 |
| 4/22/2018 9:51  | 4.4 | 20.1 | 5.2 | 2.6 | 0.1232 | 2.7 |
| 4/22/2018 9:52  | 3.6 | 20.2 | 5.2 | 2.6 | 0.1247 | 2.7 |
| 4/22/2018 9:53  | 3.4 | 19.9 | 5.2 | 2.6 | 0.1123 | 2.7 |
| 4/22/2018 9:54  | 3.4 | 20   | 5.1 | 2.6 | 0.1261 | 2.8 |
| 4/22/2018 9:55  | 3.1 | 20.1 | 5.1 | 2.6 | 0.1097 | 3   |
| 4/22/2018 9:56  | 3.7 | 20.2 | 5.1 | 2.6 | 0.121  | 3.1 |
| 4/22/2018 9:57  | 3.3 | 20   | 5.1 | 2.6 | 0.121  | 3.2 |
| 4/22/2018 9:58  | 3.4 | 20.1 | 5.1 | 2.6 | 0.1269 | 3.3 |
| 4/22/2018 9:59  | 4.4 | 20.1 | 5   | 2.6 | 0.1183 | 3.3 |
| 4/22/2018 10:00 | 3.8 | 20.3 | 5   | 2.6 | 0.1192 | 3.1 |
| 4/22/2018 10:01 | 3   | 20.2 | 5   | 2.6 | 0.1267 | 2.9 |
| 4/22/2018 10:02 | 3.9 | 20.1 | 5   | 2.6 | 0.1145 | 3   |
| 4/22/2018 10:03 | 3.9 | 20.3 | 5   | 2.6 | 0.1243 | 2.9 |
| 4/22/2018 10:04 | 3.9 | 20   | 5   | 2.6 | 0.1158 | 3   |
| 4/22/2018 10:05 | 2.3 | 20   | 5   | 2.6 | 0.1176 | 3   |
| 4/22/2018 10:06 | 2.3 | 19.9 | 5   | 2.6 | 0.1287 | 3.2 |
| 4/22/2018 10:07 | 4.2 | 20.4 | 5   | 2.6 | 0.1148 | 3.2 |
| 4/22/2018 10:08 | 2.7 | 20   | 4.9 | 2.6 | 0.1334 | 3.3 |
| 4/22/2018 10:09 | 3.3 | 19.6 | 4.9 | 2.6 | 0.1187 | 3.3 |
| 4/22/2018 10:10 | 3.7 | 20   | 4.9 | 2.6 | 0.1261 | 3.2 |
| 4/22/2018 10:11 | 3.8 | 19.6 | 4.9 | 2.6 | 0.1201 | 3.2 |
| 4/22/2018 10:12 | 3.8 | 20.3 | 4.9 | 2.6 | 0.113  | 3.2 |
| 4/22/2018 10:13 | 2.8 | 19.9 | 4.9 | 2.6 | 0.1306 | 3.3 |
| 4/22/2018 10:14 | 4.7 | 20.3 | 4.8 | 2.6 | 0.1115 | 3.5 |
| 4/22/2018 10:15 | 3.1 | 20.2 | 4.8 | 2.6 | 0.122  | 3.7 |
| 4/22/2018 10:16 | 2.6 | 20.1 | 4.7 | 2.6 | 0.1217 | 3.8 |

|                 |     |      |     |     |        |     |
|-----------------|-----|------|-----|-----|--------|-----|
| 4/22/2018 10:17 | 4.2 | 20   | 4.8 | 2.6 | 0.1246 | 2.9 |
| 4/22/2018 10:18 | 3.5 | 20   | 4.7 | 2.5 | 0.1328 | 2.4 |
| 4/22/2018 10:19 | 2.6 | 20.3 | 4.7 | 2.5 | 0.1138 | 2.7 |
| 4/22/2018 10:20 | 3.8 | 20.1 | 4.7 | 2.5 | 0.131  | 2.7 |
| 4/22/2018 10:21 | 4.4 | 20.2 | 4.7 | 2.5 | 0.1189 | 2.9 |
| 4/22/2018 10:22 | 2.6 | 19.8 | 4.7 | 2.5 | 0.1242 | 2.8 |
| 4/22/2018 10:23 | 2.2 | 19.9 | 4.7 | 2.6 | 0.1198 | 2.6 |
| 4/22/2018 10:24 | 3   | 20.4 | 4.7 | 2.6 | 0.1196 | 2.5 |
| 4/22/2018 10:25 | 4.7 | 20.2 | 4.6 | 2.6 | 0.1223 | 2.5 |
| 4/22/2018 10:26 | 3.8 | 20.3 | 4.6 | 2.6 | 0.1088 | 2.6 |
| 4/22/2018 10:27 | 4.2 | 19.7 | 4.6 | 2.6 | 0.131  | 2.8 |
| 4/22/2018 10:28 | 3   | 20.1 | 4.6 | 2.6 | 0.1148 | 2.4 |
| 4/22/2018 10:29 | 4   | 20.1 | 4.5 | 2.6 | 0.1229 | 2.1 |
| 4/22/2018 10:30 | 3.9 | 20.2 | 4.5 | 2.6 | 0.1274 | 2.4 |
| 4/22/2018 10:31 | 4.2 | 19.9 | 4.5 | 2.6 | 0.1185 | 2.5 |
| 4/22/2018 10:32 | 4.7 | 20.4 | 4.5 | 2.6 | 0.1257 | 2.4 |
| 4/22/2018 10:33 | 3.9 | 20.2 | 4.4 | 2.6 | 0.1125 | 2.3 |
| 4/22/2018 10:34 | 3.8 | 20.2 | 4.4 | 2.6 | 0.1256 | 2.4 |
| 4/22/2018 10:35 | 2.7 | 20.1 | 4.4 | 2.6 | 0.1235 | 2.3 |
| 4/22/2018 10:36 | 4.2 | 20.4 | 4.4 | 2.5 | 0.1211 | 2.3 |
| 4/22/2018 10:37 | 4.1 | 20.7 | 4.4 | 2.5 | 0.1303 | 2.3 |
| 4/22/2018 10:38 | 3.8 | 20.4 | 4.4 | 2.5 | 0.11   | 2.6 |
| 4/22/2018 10:39 | 3   | 20.4 | 4.3 | 2.6 | 0.1292 | 2.8 |
| 4/22/2018 10:40 | 3.1 | 20.5 | 4.3 | 2.5 | 0.1209 | 2.8 |
| 4/22/2018 10:41 | 3.1 | 20.4 | 4.3 | 2.5 | 0.1221 | 3   |
| 4/22/2018 10:42 | 3   | 20.3 | 4.3 | 2.5 | 0.125  | 2.9 |
| 4/22/2018 10:43 | 4.5 | 20.1 | 4.3 | 2.6 | 0.1156 | 3.1 |
| 4/22/2018 10:44 | 3.3 | 20.3 | 4.3 | 2.6 | 0.1337 | 3.1 |
| 4/22/2018 10:45 | 3   | 20   | 4.3 | 2.6 | 0.1172 | 3.2 |
| 4/22/2018 10:46 | 3.8 | 20.3 | 4.3 | 2.6 | 0.1204 | 3.2 |
| 4/22/2018 10:47 | 2.8 | 20.4 | 4.2 | 2.6 | 0.1197 | 3.3 |
| 4/22/2018 10:48 | 2.8 | 20.3 | 4.2 | 2.6 | 0.121  | 2.9 |
| 4/22/2018 10:49 | 4.2 | 20.6 | 4.2 | 2.6 | 0.1246 | 2.9 |
| 4/22/2018 10:50 | 4.7 | 20   | 4.3 | 2.6 | 0.1148 | 3.1 |
| 4/22/2018 10:51 | 4   | 20.2 | 4.2 | 2.5 | 0.1285 | 3.3 |
| 4/22/2018 10:52 | 3.1 | 20.7 | 4.2 | 2.5 | 0.1087 | 3.4 |
| 4/22/2018 10:53 | 4.5 | 20.6 | 4.2 | 2.5 | 0.126  | 3.4 |
| 4/22/2018 10:54 |     | 20.4 | 4.2 | 2.5 | 0.1128 | 3.1 |
| 4/22/2018 10:55 |     | 20.3 | 4.1 | 2.5 | 0.1208 | 2.1 |
| 4/22/2018 10:56 | 3.7 | 20.8 | 4.1 | 2.5 | 0.1316 | 2.2 |
| 4/22/2018 10:57 | 3.4 | 20.4 | 4.1 | 2.5 | 0.1116 | 2.5 |
| 4/22/2018 10:58 | 5.7 | 20.8 | 4.2 | 2.5 | 0.1239 | 2.7 |
| 4/22/2018 10:59 | 3.6 | 20.3 | 4.1 | 2.5 | 0.1162 | 2.7 |
| 4/22/2018 11:00 | 3.3 | 20.2 | 4.1 | 2.5 | 0.1248 | 2.9 |
| 4/22/2018 11:01 |     | 20.6 | 4.1 | 2.5 | 0.1204 | 3.1 |
| 4/22/2018 11:02 | 6.2 | 20.9 | 4.1 | 2.5 | 0.1206 | 3.1 |
| 4/22/2018 11:03 |     | 20.5 | 4.1 | 2.5 | 0.1243 | 3.3 |

|                 |     |      |     |     |        |     |
|-----------------|-----|------|-----|-----|--------|-----|
| 4/22/2018 11:04 | 3.1 | 20.4 | 4.1 | 2.5 | 0.1121 | 3.3 |
| 4/22/2018 11:05 |     | 20.5 | 4.1 | 2.5 | 0.1261 | 3.3 |
| 4/22/2018 11:06 | 3.6 | 20.7 | 4.1 | 2.5 | 0.1129 | 3.2 |
| 4/22/2018 11:07 |     | 20.6 | 4   | 2.5 | 0.1241 | 3.4 |
| 4/22/2018 11:08 | 2.7 | 20.5 | 4   | 2.5 | 0.111  | 3.4 |
| 4/22/2018 11:09 |     | 20.9 | 4   | 2.5 | 0.1195 | 3.3 |
| 4/22/2018 11:10 |     | 21   | 4   | 2.5 | 0.1223 | 3.2 |
| 4/22/2018 11:11 |     | 20.7 | 4   | 2.5 | 0.1127 | 3.2 |
| 4/22/2018 11:12 | 3.3 | 20.8 | 4   | 2.5 | 0.1248 | 2.9 |
| 4/22/2018 11:13 | 3.8 | 21   | 3.9 | 2.5 | 0.1128 | 2.9 |
| 4/22/2018 11:14 | 3.5 | 20.9 | 3.9 | 2.5 | 0.1256 | 2.9 |
| 4/22/2018 11:15 | 2.2 | 20.5 | 3.9 | 2.5 | 0.112  | 3   |
| 4/22/2018 11:16 | 3.5 | 20.8 | 3.9 | 2.5 | 0.1211 | 3.1 |
| 4/22/2018 11:17 | 2.8 | 20.5 | 3.9 | 2.5 | 0.1213 | 3.1 |
| 4/22/2018 11:18 | 4.4 | 20.7 | 3.9 | 2.5 | 0.1177 | 3.1 |
| 4/22/2018 11:19 | 3.9 | 21   | 3.9 | 2.5 | 0.1206 | 3   |
| 4/22/2018 11:20 | 3   | 20.9 | 3.9 | 2.5 | 0.1112 | 2.7 |
| 4/22/2018 11:21 | 3   | 20.3 | 3.9 | 2.5 | 0.1337 | 2.6 |
| 4/22/2018 11:22 | 3.9 | 20.7 | 3.8 | 2.5 | 0.1137 | 2.6 |
| 4/22/2018 11:23 | 5.2 | 21   | 3.8 | 2.5 | 0.1281 | 2.6 |
| 4/22/2018 11:24 | 2.8 | 21   | 3.8 | 2.5 | 0.1168 | 2.7 |
| 4/22/2018 11:25 | 3.8 | 20.9 | 3.8 | 2.5 | 0.1166 | 2.7 |
| 4/22/2018 11:26 | 3   | 20.9 | 3.8 | 2.5 | 0.1235 | 2.6 |
| 4/22/2018 11:27 | 5.6 | 21.1 | 3.7 | 2.5 | 0.1154 | 2.8 |
| 4/22/2018 11:28 | 4.4 | 21.7 | 3.7 | 2.5 | 0.1319 | 2.9 |
| 4/22/2018 11:29 | 3.9 | 21.1 | 3.7 | 2.5 | 0.1152 | 2.9 |
| 4/22/2018 11:30 | 4.2 | 21.4 | 3.7 | 2.4 | 0.1266 | 3   |
| 4/22/2018 11:31 | 4   | 21.3 | 3.7 | 2.4 | 0.1172 | 3   |
| 4/22/2018 11:32 | 5.2 | 21.1 | 3.7 | 2.4 | 0.1168 | 2.9 |
| 4/22/2018 11:33 | 5.3 | 20.8 | 3.6 | 2.4 | 0.1209 | 3   |
| 4/22/2018 11:34 | 4.6 | 21.1 | 3.6 | 2.4 | 0.1164 | 2.8 |
| 4/22/2018 11:35 | 4.7 | 21.2 | 3.6 | 2.4 | 0.1277 | 2.8 |
| 4/22/2018 11:36 | 4.8 | 21.1 | 3.6 | 2.4 | 0.1156 | 2.8 |
| 4/22/2018 11:37 | 4.7 | 21   | 3.6 | 2.5 | 0.1253 | 2.8 |
| 4/22/2018 11:38 | 3.9 | 20.7 | 3.7 | 2.5 | 0.1184 | 2.9 |
| 4/22/2018 11:39 | 3.4 | 21.2 | 3.6 | 2.5 | 0.1162 | 2.9 |
| 4/22/2018 11:40 | 4.4 | 21.3 | 3.6 | 2.5 | 0.1272 | 2.8 |
| 4/22/2018 11:41 | 4   | 21   | 3.6 | 2.5 | 0.1111 | 3   |
| 4/22/2018 11:42 | 3.5 | 21   | 3.6 | 2.5 | 0.1288 | 2.9 |
| 4/22/2018 11:43 | 3   | 21.5 | 3.5 | 2.5 | 0.1108 | 2.6 |
| 4/22/2018 11:44 | 3.5 | 21.2 | 3.5 | 2.5 | 0.1272 | 2.3 |
| 4/22/2018 11:45 | 3.5 | 21.3 | 3.5 | 2.5 | 0.1187 | 2.3 |
| 4/22/2018 11:46 | 3.7 | 21.4 | 3.5 | 2.5 | 0.1223 | 2.4 |
| 4/22/2018 11:47 | 3.9 | 21.9 | 3.5 | 2.4 | 0.1228 | 2.4 |
| 4/22/2018 11:48 | 4.7 | 22.1 | 3.5 | 2.4 | 0.1073 | 2.4 |
| 4/22/2018 11:49 | 3.5 | 21.7 | 3.5 | 2.4 | 0.1301 | 2.6 |
| 4/22/2018 11:50 | 4.5 | 21.5 | 3.5 | 2.3 | 0.1098 | 2.6 |

|                 |     |      |     |     |        |     |
|-----------------|-----|------|-----|-----|--------|-----|
| 4/22/2018 11:51 | 4.8 | 21.3 | 3.5 | 2.3 | 0.1284 | 2.7 |
| 4/22/2018 11:52 | 3.9 | 21.6 | 3.5 | 2.3 | 0.1239 | 2.8 |
| 4/22/2018 11:53 | 4   | 21.4 | 3.5 | 2.3 | 0.1207 | 2.9 |
| 4/22/2018 11:54 | 5.4 | 21.4 | 3.5 | 2.3 | 0.1252 | 3   |
| 4/22/2018 11:55 | 4.9 | 21.3 | 3.5 | 2.3 | 0.1113 | 3.2 |
| 4/22/2018 11:56 | 3.4 | 21.2 | 3.4 | 2.3 | 0.1275 | 3.2 |
| 4/22/2018 11:57 | 2.5 | 21   | 3.5 | 2.4 | 0.1178 | 3.2 |
| 4/22/2018 11:58 | 5   | 21.1 | 3.5 | 2.4 | 0.1276 | 3.2 |
| 4/22/2018 11:59 | 4.4 | 21.5 | 3.4 | 2.4 | 0.1234 | 3.3 |
| 4/22/2018 12:00 | 4.2 | 21.6 | 3.4 | 2.4 | 0.1237 | 3.3 |
| 4/22/2018 12:01 | 2.9 | 21.2 | 3.4 | 2.4 | 0.1253 | 3.4 |
| 4/22/2018 12:02 | 3.4 | 21.4 | 3.4 | 2.4 | 0.107  | 3.3 |
| 4/22/2018 12:03 | 3.9 | 21.5 | 3.4 | 2.5 | 0.1253 | 3.5 |
| 4/22/2018 12:04 | 4.8 | 21.2 | 3.3 | 2.4 | 0.1175 | 3.6 |
| 4/22/2018 12:05 | 4.5 | 21.4 | 3.3 | 2.4 | 0.1217 | 3.5 |
| 4/22/2018 12:06 | 5.1 | 21.2 | 3.3 | 2.4 | 0.1176 | 3.5 |
| 4/22/2018 12:07 | 6.3 | 21.6 | 3.3 | 2.4 | 0.1117 | 3.5 |
| 4/22/2018 12:08 | 5.2 | 21.7 | 3.3 | 2.4 | 0.1228 | 3.5 |
| 4/22/2018 12:09 | 3.9 | 21.8 | 3.3 | 2.4 | 0.1055 | 3.6 |
| 4/22/2018 12:10 | 5.1 | 21.7 | 3.2 | 2.4 | 0.1329 | 3.6 |
| 4/22/2018 12:11 | 3.9 | 21.5 | 3.2 | 2.4 | 0.1081 | 3.6 |
| 4/22/2018 12:12 | 5.1 | 21.4 | 3.2 | 2.4 | 0.1299 | 3.5 |
| 4/22/2018 12:13 | 2.6 | 21.4 | 3.2 | 2.4 | 0.1201 | 3.3 |
| 4/22/2018 12:14 | 3.8 | 21   | 3.2 | 2.4 | 0.1147 | 3.4 |
| 4/22/2018 12:15 | 4.7 | 21.8 | 3.2 | 2.4 | 0.1317 | 3.3 |
| 4/22/2018 12:16 | 3.5 | 21.4 | 3.2 | 2.4 | 0.1096 | 3.3 |
| 4/22/2018 12:17 | 3.5 | 21.3 | 3.2 | 2.4 | 0.1268 | 3.3 |
| 4/22/2018 12:18 | 3.4 | 21.6 | 3.2 | 2.4 | 0.1163 | 3.1 |
| 4/22/2018 12:19 | 4.7 | 21.9 | 3.1 | 2.4 | 0.1256 | 2.9 |
| 4/22/2018 12:20 | 4.4 | 21.7 | 3.1 | 2.4 | 0.1143 | 2.8 |
| 4/22/2018 12:21 | 3.5 | 21.2 | 3.1 | 2.4 | 0.1239 | 2.7 |
| 4/22/2018 12:22 | 3.3 | 21.5 | 3.1 | 2.4 | 0.1232 | 2.6 |
| 4/22/2018 12:23 | 4.1 | 21.6 | 3.1 | 2.4 | 0.1141 | 2.5 |
| 4/22/2018 12:24 | 5.7 | 21.6 | 3.1 | 2.4 | 0.1248 | 2.4 |
| 4/22/2018 12:25 | 3.6 | 21.7 | 3.1 | 2.4 | 0.1032 | 2.5 |
| 4/22/2018 12:26 | 5.8 | 21.7 | 3   | 2.4 | 0.1235 | 2.6 |
| 4/22/2018 12:27 | 4.1 | 21.7 | 3   | 2.4 | 0.1137 | 2.6 |
| 4/22/2018 12:28 | 5.2 | 21.7 | 3   | 2.4 | 0.1183 | 2.6 |
| 4/22/2018 12:29 | 4.5 | 21.6 | 3   | 2.4 | 0.1262 | 2.5 |
| 4/22/2018 12:30 | 3.5 | 21.7 | 3   | 2.4 | 0.1169 | 2.5 |
| 4/22/2018 12:31 | 3.4 | 21.7 | 3   | 2.4 | 0.1306 | 2.6 |
| 4/22/2018 12:32 | 3.7 | 21.3 | 3   | 2.4 | 0.1057 | 2.6 |
| 4/22/2018 12:33 | 3.6 | 21.2 | 3   | 2.4 | 0.1208 | 2.7 |
| 4/22/2018 12:34 | 3   | 21.6 | 2.9 | 2.4 | 0.1198 | 2.6 |
| 4/22/2018 12:35 | 3.8 | 21.7 | 2.9 | 2.4 | 0.1233 | 2.5 |
| 4/22/2018 12:36 | 4.5 | 21.3 | 2.9 | 2.4 | 0.1263 | 2.5 |
| 4/22/2018 12:37 | 5.8 | 21.1 | 3   | 2.4 | 0.1183 | 2.4 |



|                 |     |      |     |     |        |     |
|-----------------|-----|------|-----|-----|--------|-----|
| 4/22/2018 12:38 | 4.9 | 21.6 | 3   | 2.4 | 0.1249 | 2.3 |
| 4/22/2018 12:39 | 5.6 | 21.8 | 2.9 | 2.4 | 0.1111 | 2.3 |
| 4/22/2018 12:40 | 4.5 | 21.7 | 2.9 | 2.4 | 0.1182 | 2.4 |
| 4/22/2018 12:41 | 3.8 | 21.6 | 2.9 | 2.4 | 0.1186 | 2.5 |
| 4/22/2018 12:42 | 4.2 | 21.7 | 2.9 | 2.4 | 0.1126 | 2.4 |
| 4/22/2018 12:43 | 3.6 | 21.5 | 2.9 | 2.4 | 0.1215 | 2.4 |
| 4/22/2018 12:44 | 4.4 | 21.3 | 2.9 | 2.4 | 0.1123 | 2.4 |
| 4/22/2018 12:45 | 5.2 | 21.6 | 2.8 | 2.4 | 0.125  | 2.4 |
| 4/22/2018 12:46 | 4.1 | 22   | 2.8 | 2.4 | 0.1087 | 2.4 |
| 4/22/2018 12:47 | 4.6 | 21.9 | 2.8 | 2.4 | 0.1264 | 2.3 |
| 4/22/2018 12:48 | 5.2 | 22.2 | 2.8 | 2.4 | 0.1195 | 2.3 |
| 4/22/2018 12:49 | 5.4 | 22.1 | 2.8 | 2.4 | 0.114  | 2.4 |
| 4/22/2018 12:50 | 5.4 | 22.1 | 2.8 | 2.3 | 0.1236 | 2.4 |
| 4/22/2018 12:51 | 5.3 | 22.2 | 2.8 | 2.3 | 0.1082 | 2.4 |
| 4/22/2018 12:52 | 3.6 | 21.6 | 2.8 | 2.3 | 0.1226 | 2.4 |
| 4/22/2018 12:53 | 4.1 | 21.8 | 2.8 | 2.3 | 0.1144 | 2.5 |
| 4/22/2018 12:54 | 4.4 | 21.4 | 2.8 | 2.3 | 0.1167 | 2.4 |
| 4/22/2018 12:55 | 4.9 | 22.1 | 2.8 | 2.3 | 0.1177 | 2.5 |
| 4/22/2018 12:56 | 2.9 | 21.4 | 2.8 | 2.3 | 0.1178 | 2.4 |
| 4/22/2018 12:57 | 4   | 21.5 | 2.8 | 2.4 | 0.1222 | 2.4 |
| 4/22/2018 12:58 | 4.1 | 21.7 | 2.8 | 2.4 | 0.1103 | 2.3 |
| 4/22/2018 12:59 | 4.6 | 22.1 | 2.8 | 2.4 | 0.1304 | 2.4 |
| 4/22/2018 13:00 | 4.2 | 22.1 | 2.8 | 2.4 | 0.1146 | 2.4 |
| 4/22/2018 13:01 | 3.3 | 21.7 | 2.8 | 2.4 | 0.1159 | 2.5 |
| 4/22/2018 13:02 | 4.2 | 21.6 | 2.7 | 2.4 | 0.114  | 2.7 |
| 4/22/2018 13:03 | 4.5 | 21.6 | 2.7 | 2.4 | 0.114  | 2.7 |
| 4/22/2018 13:04 | 4.3 | 21.2 | 2.8 | 2.4 | 0.1262 | 2.7 |
| 4/22/2018 13:05 | 4.7 | 21.4 | 2.7 | 2.4 | 0.107  | 2.8 |
| 4/22/2018 13:06 | 4.4 | 21.6 | 2.7 | 2.4 | 0.1206 | 2.9 |
| 4/22/2018 13:07 | 5.4 | 22   | 2.7 | 2.4 | 0.1067 | 3   |
| 4/22/2018 13:08 | 4.5 | 21.9 | 2.7 | 2.4 | 0.1239 | 2.8 |
| 4/22/2018 13:09 | 3.8 | 21.7 | 2.7 | 2.4 | 0.1116 | 2.9 |
| 4/22/2018 13:10 | 4.7 | 21.8 | 2.7 | 2.4 | 0.1149 | 3.1 |
| 4/22/2018 13:11 | 3.1 | 21.6 | 2.7 | 2.4 | 0.126  | 3.2 |
| 4/22/2018 13:12 | 4.4 | 21.6 | 2.6 | 2.3 | 0.1042 | 3.1 |
| 4/22/2018 13:13 | 3.9 | 21.7 | 2.6 | 2.3 | 0.1238 | 3.1 |
| 4/22/2018 13:14 | 4.7 | 22   | 2.6 | 2.3 | 0.1167 | 3.1 |
| 4/22/2018 13:15 | 5.1 | 21.9 | 2.6 | 2.3 | 0.1247 | 3.1 |
| 4/22/2018 13:16 | 3.9 | 22   | 2.6 | 2.3 | 0.1068 | 3   |
| 4/22/2018 13:17 | 3.8 | 21.5 | 2.6 | 2.3 | 0.119  | 3   |
| 4/22/2018 13:18 | 3.3 | 21.6 | 2.6 | 2.4 | 0.1228 | 2.9 |
| 4/22/2018 13:19 | 4.9 | 21.3 | 2.6 | 2.4 | 0.116  | 2.2 |
| 4/22/2018 13:20 | 4.1 | 22   | 2.6 | 2.4 | 0.1184 | 2.4 |
| 4/22/2018 13:21 | 5.2 | 21.5 | 2.6 | 2.4 | 0.1084 | 2.6 |
| 4/22/2018 13:22 | 5.4 | 22   | 2.6 | 2.4 | 0.119  | 2.9 |
| 4/22/2018 13:23 | 3.8 | 21.8 | 2.6 | 2.4 | 0.1081 | 3.1 |
| 4/22/2018 13:24 | 4.5 | 21.7 | 2.6 | 2.4 | 0.1176 | 3.1 |

|                 |     |      |     |     |        |     |
|-----------------|-----|------|-----|-----|--------|-----|
| 4/22/2018 13:25 | 4   | 21.4 | 2.6 | 2.4 | 0.1155 | 3.2 |
| 4/22/2018 13:26 | 3.4 | 21.6 | 2.5 | 2.4 | 0.1114 | 3.2 |
| 4/22/2018 13:27 | 3.1 | 21.9 | 2.6 | 2.4 | 0.1182 | 3.2 |
| 4/22/2018 13:28 | 4   | 21.9 | 2.5 | 2.4 | 0.1078 | 3.4 |
| 4/22/2018 13:29 | 4.2 | 21.6 | 2.5 | 2.4 | 0.1201 | 3.5 |
| 4/22/2018 13:30 | 5.1 | 21.9 | 2.5 | 2.4 | 0.1087 | 3.6 |
| 4/22/2018 13:31 | 4.5 | 22   | 2.5 | 2.4 | 0.1182 | 3.6 |
| 4/22/2018 13:32 | 4.9 | 22.1 | 2.5 | 2.4 | 0.1147 | 3.7 |
| 4/22/2018 13:33 | 4.4 | 21.8 | 2.5 | 2.3 | 0.1229 | 3.8 |
| 4/22/2018 13:34 | 4.2 | 22   | 2.5 | 2.3 | 0.1197 | 3.8 |
| 4/22/2018 13:35 | 5.1 | 21.8 | 2.5 | 2.3 | 0.1164 | 3.9 |
| 4/22/2018 13:36 | 3.9 | 22.7 | 2.5 | 2.3 | 0.1191 | 3.8 |
| 4/22/2018 13:37 | 4.4 | 22.4 | 2.5 | 2.3 | 0.1105 | 3.8 |
| 4/22/2018 13:38 | 4.9 | 21.7 | 2.5 | 2.3 | 0.1223 | 3.8 |
| 4/22/2018 13:39 | 4.1 | 21.8 | 2.5 | 2.3 | 0.1201 | 3.7 |
| 4/22/2018 13:40 | 5.5 | 22.6 | 2.5 | 2.4 | 0.1153 | 3.7 |
| 4/22/2018 13:41 | 5.8 | 22.2 | 2.5 | 2.3 | 0.1209 | 3.8 |
| 4/22/2018 13:42 | 3.3 | 21.7 | 2.5 | 2.3 | 0.1133 | 3.8 |
| 4/22/2018 13:43 | 4   | 22   | 2.5 | 2.3 | 0.1251 | 3.6 |
| 4/22/2018 13:44 | 5.1 | 22.1 | 2.5 | 2.3 | 0.1213 | 3.5 |
| 4/22/2018 13:45 | 4.3 | 22.1 | 2.4 | 2.4 | 0.1224 | 3.2 |
| 4/22/2018 13:46 | 4.7 | 21.8 | 2.4 | 2.4 | 0.1131 | 3   |
| 4/22/2018 13:47 | 4.3 | 21.9 | 2.4 | 2.3 | 0.1155 | 2.7 |
| 4/22/2018 13:48 | 5.2 | 22.4 | 2.4 | 2.3 | 0.1053 | 2.9 |
| 4/22/2018 13:49 | 5   | 22.3 | 2.4 | 2.3 | 0.1136 | 2.9 |
| 4/22/2018 13:50 | 4.8 | 23   | 2.4 | 2.3 | 0.1243 | 2.9 |
| 4/22/2018 13:51 | 4.3 | 22.6 | 2.4 | 2.3 | 0.1095 | 2.7 |
| 4/22/2018 13:52 | 5.5 | 22.3 | 2.4 | 2.3 | 0.1306 | 2.4 |
| 4/22/2018 13:53 | 5.1 | 22.2 | 2.4 | 2.3 | 0.1085 | 2.2 |
| 4/22/2018 13:54 | 4.8 | 22.7 | 2.4 | 2.2 | 0.1223 | 2.4 |
| 4/22/2018 13:55 | 4.9 | 22.9 | 2.4 | 2.2 | 0.1191 | 2.5 |
| 4/22/2018 13:56 | 4.9 | 22.4 | 2.4 | 2.2 | 0.1146 | 2.7 |
| 4/22/2018 13:57 | 4.5 | 22.2 | 2.4 | 2.2 | 0.1237 | 2.2 |
| 4/22/2018 13:58 | 5.4 | 22.2 | 2.4 | 2.2 | 0.1153 | 1.6 |
| 4/22/2018 13:59 | 3.5 | 22.3 | 2.4 | 2.3 | 0.1245 | 1.5 |
| 4/22/2018 14:00 | 5.2 | 21.8 | 2.4 | 2.3 | 0.1145 | 1.6 |
| 4/22/2018 14:01 | 4.3 | 21.8 | 2.4 | 2.3 | 0.1233 | 1.9 |
| 4/22/2018 14:02 | 4.2 | 22   | 2.4 | 2.3 | 0.1105 | 2   |
| 4/22/2018 14:03 | 4.2 | 22.3 | 2.4 | 2.3 | 0.1138 | 1.8 |
| 4/22/2018 14:04 | 4   | 22.5 | 2.4 | 2.3 | 0.1206 | 1.8 |
| 4/22/2018 14:05 | 3   | 22.3 | 2.4 | 2.3 | 0.1143 | 1.9 |
| 4/22/2018 14:06 | 6.2 | 22.2 | 2.4 | 2.3 | 0.1243 | 2.1 |
| 4/22/2018 14:07 | 3.5 | 22.2 | 2.4 | 2.3 | 0.1085 | 2.3 |
| 4/22/2018 14:08 | 4.6 | 22   | 2.4 | 2.3 | 0.1223 | 2.2 |
| 4/22/2018 14:09 | 4   | 21.8 | 2.3 | 2.3 | 0.1156 | 2.3 |
| 4/22/2018 14:10 | 4.8 | 22.2 | 2.4 | 2.3 | 0.1207 | 2.3 |
| 4/22/2018 14:11 | 5.5 | 22.5 | 2.4 | 2.3 | 0.1177 | 2.3 |

|                 |     |      |     |     |        |     |
|-----------------|-----|------|-----|-----|--------|-----|
| 4/22/2018 14:12 | 5.7 | 22.2 | 2.3 | 2.3 | 0.1071 | 2.2 |
| 4/22/2018 14:13 | 4.8 | 21.9 | 2.3 | 2.3 | 0.1202 | 2.1 |
| 4/22/2018 14:14 | 4.1 | 22.4 | 2.3 | 2.3 | 0.1047 | 2.2 |
| 4/22/2018 14:15 |     | 22   | 2.3 | 2.3 | 0.1268 | 2.3 |
| 4/22/2018 14:16 |     | 22.6 | 2.3 | 2.3 | 0.1137 | 2.3 |
| 4/22/2018 14:17 | 4.6 | 22.2 | 2.3 | 2.3 | 0.1246 | 2.4 |
| 4/22/2018 14:18 |     | 22.3 | 2.3 | 2.3 | 0.1215 | 2.4 |
| 4/22/2018 14:19 |     | 22.3 | 2.3 | 2.3 | 0.1155 | 2.5 |
| 4/22/2018 14:20 | 4.2 | 22.4 | 2.3 | 2.3 | 0.1115 | 2.4 |
| 4/22/2018 14:21 |     | 22.4 | 2.3 | 2.3 | 0.1084 | 2.5 |
| 4/22/2018 14:22 | 8.1 | 22.1 | 2.3 | 2.3 | 0.1239 | 2.7 |
| 4/22/2018 14:23 |     | 22.2 | 2.3 | 2.3 | 0.1156 | 2.8 |
| 4/22/2018 14:24 | 5   | 21.7 | 2.3 | 2.3 | 0.1226 | 2.6 |
| 4/22/2018 14:25 | 3.5 | 21.7 | 2.3 | 2.3 | 0.1127 | 2.8 |
| 4/22/2018 14:26 | 4.8 | 22   | 2.3 | 2.3 | 0.1152 | 2.9 |
| 4/22/2018 14:27 |     | 22   | 2.3 | 2.3 | 0.1228 | 2.9 |
| 4/22/2018 14:28 |     | 22.3 | 2.3 | 2.3 | 0.1022 | 2.9 |
| 4/22/2018 14:29 |     | 22   | 2.3 | 2.3 | 0.1169 | 2.9 |
| 4/22/2018 14:30 |     | 22.2 | 2.3 | 2.3 | 0.1079 | 3   |
| 4/22/2018 14:31 | 5.5 | 22.5 | 2.3 | 2.3 | 0.1153 | 2.8 |
| 4/22/2018 14:32 | 6.4 | 22.1 | 2.3 | 2.3 | 0.109  | 2.8 |
| 4/22/2018 14:33 | 5.7 | 22.2 | 2.3 | 2.3 | 0.1076 | 2.9 |
| 4/22/2018 14:34 | 3.7 | 22   | 2.2 | 2.3 | 0.1133 | 2.7 |
| 4/22/2018 14:35 | 5.1 | 22.6 | 2.3 | 2.2 | 0.1026 | 2.8 |
| 4/22/2018 14:36 | 4.5 | 21.9 | 2.2 | 2.2 | 0.119  | 2.8 |
| 4/22/2018 14:37 | 4.8 | 22.4 | 2.2 | 2.2 | 0.1005 | 2.7 |
| 4/22/2018 14:38 | 6.2 | 21.9 | 2.2 | 2.2 | 0.1139 | 2.6 |
| 4/22/2018 14:39 | 4.9 | 22.4 | 2.3 | 2.2 | 0.1196 | 2.7 |
| 4/22/2018 14:40 | 5.4 | 22.2 | 2.2 | 2.2 | 0.1    | 2.7 |
| 4/22/2018 14:41 | 5.2 | 22.1 | 2.2 | 2.2 | 0.1282 | 2.4 |
| 4/22/2018 14:42 | 4.6 | 22   | 2.2 | 2.2 | 0.1103 | 2.3 |
| 4/22/2018 14:43 | 5.5 | 22.6 | 2.2 | 2.2 | 0.1115 | 2.4 |
| 4/22/2018 14:44 | 4.3 | 22.4 | 2.2 | 2.2 | 0.1048 | 2.5 |
| 4/22/2018 14:45 | 3.4 | 22   | 2.2 | 2.2 | 0.1118 | 2.5 |
| 4/22/2018 14:46 | 5.5 | 22.2 | 2.2 | 2.2 | 0.1103 | 2.5 |
| 4/22/2018 14:47 | 6.1 | 22.6 | 2.2 | 2.2 | 0.1099 | 2.5 |
| 4/22/2018 14:48 | 3   | 22.5 | 2.2 | 2.2 | 0.1121 | 2.5 |
| 4/22/2018 14:49 | 5.3 | 21.5 | 2.2 | 2.2 | 0.0976 | 2.5 |
| 4/22/2018 14:50 | 2.7 | 21.9 | 2.2 | 2.2 | 0.1218 | 2.5 |
| 4/22/2018 14:51 | 4   | 21.8 | 2.2 | 2.2 | 0.1008 | 2.6 |
| 4/22/2018 14:52 | 4.9 | 22.3 | 2.2 | 2.2 | 0.1189 | 2.6 |
| 4/22/2018 14:53 | 4.7 | 22.3 | 2.2 | 2.3 | 0.1054 | 2.7 |
| 4/22/2018 14:54 | 4   | 22.3 | 2.3 | 2.3 | 0.1115 | 2.6 |
| 4/22/2018 14:55 | 4.3 | 22.4 | 2.3 | 2.3 | 0.1206 | 2.5 |
| 4/22/2018 14:56 | 4.8 | 22   | 2.3 | 2.3 | 0.1055 | 2.6 |
| 4/22/2018 14:57 | 4.5 | 22.2 | 2.3 | 2.3 | 0.1201 | 2.6 |
| 4/22/2018 14:58 | 3.9 | 22.2 | 2.3 | 2.3 | 0.1054 | 2.7 |

|                 |     |      |     |     |        |     |
|-----------------|-----|------|-----|-----|--------|-----|
| 4/22/2018 14:59 | 3.9 | 22.1 | 2.3 | 2.3 | 0.1143 | 2.6 |
| 4/22/2018 15:00 | 4.3 | 22.8 | 2.3 | 2.3 | 0.1102 | 2.6 |
| 4/22/2018 15:01 | 3.7 | 22.6 | 2.3 | 2.3 | 0.1142 | 2.6 |
| 4/22/2018 15:02 | 4.5 | 22.2 | 2.3 | 2.3 | 0.1088 | 2.4 |
| 4/22/2018 15:03 | 5   | 22.1 | 2.3 | 2.3 | 0.1048 | 2.5 |
| 4/22/2018 15:04 | 4.9 | 22.4 | 2.3 | 2.3 | 0.1196 | 2.5 |
| 4/22/2018 15:05 | 4.9 | 22.5 | 2.3 | 2.3 | 0.0998 | 2.7 |
| 4/22/2018 15:06 | 4   | 22.1 | 2.3 | 2.3 | 0.1212 | 2.7 |
| 4/22/2018 15:07 | 4.5 | 22.3 | 2.3 | 2.2 | 0.1001 | 2.7 |
| 4/22/2018 15:08 | 3.6 | 22.2 | 2.3 | 2.2 | 0.1048 | 2.7 |
| 4/22/2018 15:09 | 4.4 | 22.4 | 2.3 | 2.2 | 0.1178 | 2.7 |
| 4/22/2018 15:10 | 4.4 | 22.2 | 2.3 | 2.2 | 0.1124 | 2.8 |
| 4/22/2018 15:11 | 4.8 | 22.5 | 2.4 | 2.2 | 0.1236 | 2.8 |
| 4/22/2018 15:12 | 5.1 | 22.1 | 2.3 | 2.2 | 0.1066 | 2.8 |
| 4/22/2018 15:13 | 4.3 | 21.8 | 2.2 | 2.2 | 0.118  | 2.7 |
| 4/22/2018 15:14 | 4.7 | 22.1 | 2.3 | 2.2 | 0.107  | 2.7 |
| 4/22/2018 15:15 | 3.8 | 21.7 | 2.3 | 2.2 | 0.1154 | 2.6 |
| 4/22/2018 15:16 | 5.4 | 22   | 2.3 | 2.3 | 0.1128 | 2.7 |
| 4/22/2018 15:17 | 5.6 | 22.4 | 2.3 | 2.3 | 0.1151 | 2.8 |
| 4/22/2018 15:18 | 4.4 | 22.2 | 2.3 | 2.3 | 0.1225 | 2.9 |
| 4/22/2018 15:19 | 4.3 | 22.1 | 2.3 | 2.3 | 0.1041 | 2.9 |
| 4/22/2018 15:20 | 4.2 | 21.9 | 2.3 | 2.3 | 0.1197 | 2.9 |
| 4/22/2018 15:21 | 4.5 | 22.1 | 2.3 | 2.3 | 0.1115 | 2.6 |
| 4/22/2018 15:22 | 3.7 | 22.2 | 2.3 | 2.3 | 0.1132 | 2.7 |
| 4/22/2018 15:23 | 4.5 | 22   | 2.3 | 2.3 | 0.1141 | 2.8 |
| 4/22/2018 15:24 | 6.1 | 22   | 2.3 | 2.3 | 0.1171 | 2.8 |
| 4/22/2018 15:25 | 4.8 | 22.6 | 2.3 | 2.3 | 0.1197 | 2.7 |
| 4/22/2018 15:26 | 5   | 22   | 2.3 | 2.3 | 0.1054 | 2.2 |
| 4/22/2018 15:27 | 3.6 | 22.1 | 2.2 | 2.3 | 0.1217 | 2.1 |
| 4/22/2018 15:28 | 3.8 | 21.9 | 2.2 | 2.3 | 0.1044 | 2.3 |
| 4/22/2018 15:29 | 4.2 | 21.9 | 2.2 | 2.2 | 0.1253 | 2.3 |
| 4/22/2018 15:30 | 3   | 22   | 2.2 | 2.2 | 0.1012 | 2.4 |
| 4/22/2018 15:31 | 5.4 | 22.1 | 2.2 | 2.2 | 0.1085 | 2.4 |
| 4/22/2018 15:32 | 5.1 | 22.3 | 2.2 | 2.2 | 0.1109 | 2.5 |
| 4/22/2018 15:33 | 4.9 | 22.7 | 2.2 | 2.2 | 0.1116 | 2.5 |
| 4/22/2018 15:34 | 5.3 | 22.7 | 2.3 | 2.2 | 0.1078 | 2.5 |
| 4/22/2018 15:35 | 4.6 | 22.1 | 2.2 | 2.2 | 0.0976 | 2.5 |
| 4/22/2018 15:36 | 4.5 | 21.7 | 2.2 | 2.3 | 0.1241 | 2.6 |
| 4/22/2018 15:37 | 4.7 | 21.8 | 2.2 | 2.2 | 0.098  | 2.7 |
| 4/22/2018 15:38 | 5   | 22   | 2.2 | 2.2 | 0.1206 | 2.6 |
| 4/22/2018 15:39 | 4.8 | 21.9 | 2.2 | 2.3 | 0.1035 | 2.5 |
| 4/22/2018 15:40 | 4.7 | 22.2 | 2.2 | 2.3 | 0.1153 | 2.5 |
| 4/22/2018 15:41 | 4.6 | 22.3 | 2.2 | 2.3 | 0.1054 | 2.4 |
| 4/22/2018 15:42 | 6.2 | 22.4 | 2.2 | 2.3 | 0.1093 | 2.2 |
| 4/22/2018 15:43 | 5   | 22.2 | 2.2 | 2.3 | 0.1049 | 2.3 |
| 4/22/2018 15:44 | 3.9 | 21.9 | 2.2 | 2.3 | 0.0988 | 2.3 |
| 4/22/2018 15:45 | 4.2 | 22   | 2.2 | 2.3 | 0.1131 | 2.4 |

|                 |     |      |     |     |        |     |
|-----------------|-----|------|-----|-----|--------|-----|
| 4/22/2018 15:46 | 3.5 | 22.4 | 2.2 | 2.3 | 0.1008 | 2.4 |
| 4/22/2018 15:47 | 3.8 | 22.1 | 2.2 | 2.3 | 0.1111 | 2.5 |
| 4/22/2018 15:48 | 4.2 | 22.3 | 2.2 | 2.3 | 0.1023 | 2.4 |
| 4/22/2018 15:49 | 5   | 22.2 | 2.1 | 2.2 | 0.1157 | 2.4 |
| 4/22/2018 15:50 | 4.3 | 22   | 2.2 | 2.2 | 0.1123 | 2.4 |
| 4/22/2018 15:51 | 4.3 | 22.1 | 2.2 | 2.2 | 0.1064 | 2.3 |
| 4/22/2018 15:52 | 3.9 | 22.1 | 2.2 | 2.2 | 0.1172 | 2.2 |
| 4/22/2018 15:53 | 4.5 | 22.2 | 2.2 | 2.2 | 0.1039 | 2.2 |
| 4/22/2018 15:54 | 5   | 22.2 | 2.2 | 2.2 | 0.1129 | 2.2 |
| 4/22/2018 15:55 | 5.3 | 22.4 | 2.2 | 2.2 | 0.1051 | 2.2 |
| 4/22/2018 15:56 | 4.2 | 22.5 | 2.3 | 2.2 | 0.1154 | 2.3 |
| 4/22/2018 15:57 | 4.9 | 22   | 2.2 | 2.2 | 0.1053 | 2.4 |
| 4/22/2018 15:58 | 4.5 | 21.9 | 2.2 | 2.2 | 0.1141 | 2.4 |
| 4/22/2018 15:59 | 3.7 | 22   | 2.2 | 2.2 | 0.1161 | 2.5 |
| 4/22/2018 16:00 | 5.5 | 22.2 | 2.2 | 2.2 | 0.1051 | 2.6 |
| 4/22/2018 16:01 | 4.3 | 22.1 | 2.2 | 2.2 | 0.1163 | 2.6 |
| 4/22/2018 16:02 | 5.4 | 21.9 | 2.2 | 2.2 | 0.0993 | 2.6 |
| 4/22/2018 16:03 | 3.8 | 21.8 | 2.2 | 2.2 | 0.1177 | 2.2 |
| 4/22/2018 16:04 | 4.1 | 21.7 | 2.2 | 2.3 | 0.1012 | 1.8 |
| 4/22/2018 16:05 | 3.3 | 22.2 | 2.3 | 2.3 | 0.1182 | 1.9 |
| 4/22/2018 16:06 | 3.9 | 22   | 2.2 | 2.3 | 0.1064 | 2.2 |
| 4/22/2018 16:07 | 3.6 | 22.1 | 2.3 | 2.3 | 0.1099 | 2.4 |
| 4/22/2018 16:08 | 5   | 22.4 | 2.3 | 2.3 | 0.1209 | 2.4 |
| 4/22/2018 16:09 | 5.6 | 22   | 2.3 | 2.3 | 0.1073 | 2.5 |
| 4/22/2018 16:10 | 4.5 | 22.8 | 2.3 | 2.3 | 0.1138 | 2.6 |
| 4/22/2018 16:11 | 4.7 | 22.4 | 2.2 | 2.3 | 0.1037 | 2.7 |
| 4/22/2018 16:12 | 3.6 | 22.2 | 2.2 | 2.2 | 0.1145 | 2.5 |
| 4/22/2018 16:13 | 3.9 | 22.6 | 2.2 | 2.2 | 0.1003 | 2.2 |
| 4/22/2018 16:14 | 3.9 | 22.5 | 2.2 | 2.2 | 0.1118 | 2.3 |
| 4/22/2018 16:15 | 5.2 | 22.6 | 2.2 | 2.2 | 0.1128 | 2.3 |
| 4/22/2018 16:16 | 5   | 22.6 | 2.2 | 2.2 | 0.1039 | 2.4 |
| 4/22/2018 16:17 | 4.8 | 21.9 | 2.2 | 2.2 | 0.112  | 2.4 |
| 4/22/2018 16:18 | 5.1 | 22.8 | 2.3 | 2.2 | 0.1045 | 2.4 |
| 4/22/2018 16:19 | 5   | 22.9 | 2.2 | 2.2 | 0.1176 | 2.4 |
| 4/22/2018 16:20 | 4.8 | 23.2 | 2.3 | 2.2 | 0.1057 | 2.4 |
| 4/22/2018 16:21 | 4.1 | 23   | 2.2 | 2.1 | 0.1151 | 2.4 |
| 4/22/2018 16:22 | 5.8 | 22.7 | 2.2 | 2.1 | 0.1061 | 2.4 |
| 4/22/2018 16:23 | 5   | 22.9 | 2.2 | 2.1 | 0.1118 | 2.5 |
| 4/22/2018 16:24 | 4.1 | 22.6 | 2.1 | 2.1 | 0.1131 | 2.4 |
| 4/22/2018 16:25 | 4.1 | 22.8 | 2.2 | 2.1 | 0.1125 | 2.4 |
| 4/22/2018 16:26 | 5.1 | 22.6 | 2.2 | 2.1 | 0.1113 | 2.5 |
| 4/22/2018 16:27 | 5.7 | 22.4 | 2.2 | 2.1 | 0.1087 | 2.5 |
| 4/22/2018 16:28 | 6   | 22.3 | 2.2 | 2.1 | 0.1202 | 2.4 |
| 4/22/2018 16:29 | 4.4 | 22.6 | 2.2 | 2.1 | 0.1028 | 2.5 |
| 4/22/2018 16:30 | 4.1 | 22.2 | 2.2 | 2.1 | 0.117  | 2.4 |
| 4/22/2018 16:31 | 4.4 | 21.7 | 2.2 | 2.1 | 0.1027 | 2.5 |
| 4/22/2018 16:32 | 4.5 | 22.3 | 2.2 | 2.1 | 0.1155 | 2.5 |

|                 |     |      |     |     |        |     |
|-----------------|-----|------|-----|-----|--------|-----|
| 4/22/2018 16:33 | 5.2 | 22.2 | 2.2 | 2.1 | 0.1136 | 2.5 |
| 4/22/2018 16:34 | 5   | 22.2 | 2.2 | 2.2 | 0.1059 | 2.6 |
| 4/22/2018 16:35 | 5.6 | 22.5 | 2.2 | 2.2 | 0.1163 | 2.6 |
| 4/22/2018 16:36 | 5.1 | 22.8 | 2.3 | 2.2 | 0.1106 | 2.7 |
| 4/22/2018 16:37 | 3.2 | 22.1 | 2.2 | 2.2 | 0.1146 | 2.7 |
| 4/22/2018 16:38 | 5.4 | 22.5 | 2.2 | 2.2 | 0.1148 | 2.7 |
| 4/22/2018 16:39 | 4.3 | 22.6 | 2.2 | 2.2 | 0.1082 | 2.7 |
| 4/22/2018 16:40 | 3.8 | 22.6 | 2.2 | 2.2 | 0.1142 | 2.8 |
| 4/22/2018 16:41 | 4.1 | 23.2 | 2.2 | 2.2 | 0.1019 | 2.8 |
| 4/22/2018 16:42 | 3.4 | 22.5 | 2.2 | 2.1 | 0.117  | 2.8 |
| 4/22/2018 16:43 | 3.4 | 22.2 | 2.2 | 2.1 | 0.102  | 2.8 |
| 4/22/2018 16:44 | 5.6 | 22.5 | 2.2 | 2.2 | 0.1151 | 2.8 |
| 4/22/2018 16:45 | 4.2 | 22.3 | 2.2 | 2.2 | 0.1085 | 2.7 |
| 4/22/2018 16:46 | 5   | 22.7 | 2.2 | 2.1 | 0.1127 | 2.6 |
| 4/22/2018 16:47 | 4.4 | 23   | 2.2 | 2.1 | 0.1076 | 2.6 |
| 4/22/2018 16:48 | 4.7 | 22.4 | 2.1 | 2.1 | 0.1118 | 2.6 |
| 4/22/2018 16:49 | 4.7 | 22.8 | 2.2 | 2.1 | 0.1124 | 2.8 |
| 4/22/2018 16:50 | 6.3 | 22.7 | 2.1 | 2.1 | 0.0963 | 3   |
| 4/22/2018 16:51 | 5.5 | 22.6 | 2.2 | 2.1 | 0.111  | 3   |
| 4/22/2018 16:52 | 4.6 | 22.3 | 2.2 | 2.1 | 0.1033 | 3   |
| 4/22/2018 16:53 | 4.4 | 22.5 | 2.2 | 2.1 | 0.1121 | 2.8 |
| 4/22/2018 16:54 | 4.8 | 22.8 | 2.1 | 2.1 | 0.1064 | 2.9 |
| 4/22/2018 16:55 | 3.5 | 22.3 | 2.1 | 2.1 | 0.1029 | 2.9 |
| 4/22/2018 16:56 | 4.4 | 22.4 | 2.2 | 2.2 | 0.1182 | 2.8 |
| 4/22/2018 16:57 | 5.7 | 22.7 | 2.2 | 2.2 | 0.1093 | 2.9 |
| 4/22/2018 16:58 | 3.4 | 21.9 | 2.2 | 2.2 | 0.1154 | 3   |
| 4/22/2018 16:59 | 5.4 | 22.1 | 2.2 | 2.2 | 0.1038 | 3.1 |
| 4/22/2018 17:00 | 5.6 | 22.5 | 2.3 | 2.2 | 0.1162 | 3   |
| 4/22/2018 17:01 | 4.9 | 22.6 | 2.3 | 2.2 | 0.1134 | 3   |
| 4/22/2018 17:02 | 4.9 | 22.6 | 2.3 | 2.2 | 0.1098 | 3.1 |
| 4/22/2018 17:03 | 5.9 | 22.6 | 2.3 | 2.2 | 0.1204 | 3   |
| 4/22/2018 17:04 | 4.8 | 23   | 2.3 | 2.2 | 0.0989 | 2.9 |
| 4/22/2018 17:05 | 5   | 23.1 | 2.3 | 2.2 | 0.1133 | 2.8 |
| 4/22/2018 17:06 | 5.5 | 22.3 | 2.3 | 2.2 | 0.1031 | 2.7 |
| 4/22/2018 17:07 | 5.7 | 22.3 | 2.3 | 2.2 | 0.1177 | 2.7 |
| 4/22/2018 17:08 | 4.4 | 22.7 | 2.3 | 2.2 | 0.1074 | 2.8 |
| 4/22/2018 17:09 |     | 22.8 | 2.3 | 2.1 | 0.1159 | 2.8 |
| 4/22/2018 17:10 | 5.5 | 22.5 | 2.3 | 2.1 | 0.1095 | 2.8 |
| 4/22/2018 17:11 |     | 22.6 | 2.3 | 2.2 | 0.1144 | 2.8 |
| 4/22/2018 17:12 | 3.8 | 22.5 | 2.3 | 2.2 | 0.1174 | 2.8 |
| 4/22/2018 17:13 |     | 22.6 | 2.3 | 2.2 | 0.1124 | 2.8 |
| 4/22/2018 17:14 | 4.6 | 22.6 | 2.3 | 2.2 | 0.1194 | 2.9 |
| 4/22/2018 17:15 | 4.9 | 22.7 | 2.3 | 2.2 | 0.1063 | 2.9 |
| 4/22/2018 17:16 | 3.2 | 22.7 | 2.3 | 2.2 | 0.1224 | 2.9 |
| 4/22/2018 17:17 |     | 22.3 | 2.3 | 2.2 | 0.1062 | 2.9 |
| 4/22/2018 17:18 |     | 22.5 | 2.3 | 2.2 | 0.1138 | 2.9 |
| 4/22/2018 17:19 |     | 22.7 | 2.3 | 2.2 | 0.1092 | 2.8 |

|                 |     |      |     |     |        |     |
|-----------------|-----|------|-----|-----|--------|-----|
| 4/22/2018 17:20 | 4.8 | 22.6 | 2.3 | 2.2 | 0.1091 | 2.9 |
| 4/22/2018 17:21 | 5.3 | 22.5 | 2.3 | 2.2 | 0.1221 | 2.7 |
| 4/22/2018 17:22 | 4.3 | 22.7 | 2.3 | 2.2 | 0.1103 | 2.6 |
| 4/22/2018 17:23 | 8.5 | 22.8 | 2.3 | 2.2 | 0.1215 | 2.7 |
| 4/22/2018 17:24 | 5.2 | 22.6 | 2.3 | 2.2 | 0.1047 | 2.9 |
| 4/22/2018 17:25 | 5.4 | 22.8 | 2.4 | 2.1 | 0.1174 | 3   |
| 4/22/2018 17:26 |     | 23   | 2.4 | 2.1 | 0.1075 | 2.8 |
| 4/22/2018 17:27 | 5   | 22.9 | 2.4 | 2.1 | 0.12   | 2.7 |
| 4/22/2018 17:28 | 8.2 | 23.1 | 2.4 | 2.1 | 0.1087 | 3   |
| 4/22/2018 17:29 | 4.3 | 22.9 | 2.4 | 2.1 | 0.1142 | 3.1 |
| 4/22/2018 17:30 | 5.1 | 23.2 | 2.3 | 2.1 | 0.1102 | 3.2 |
| 4/22/2018 17:31 | 5.9 | 24.8 | 2.6 | 2.1 | 0.1112 | 3.1 |
| 4/22/2018 17:32 | 4.4 | 22.9 | 2.5 | 2   | 0.1145 | 3.2 |
| 4/22/2018 17:33 | 4.4 | 23.1 | 2.4 | 2   | 0.1022 | 3.3 |
| 4/22/2018 17:34 | 4.8 | 22.6 | 2.3 | 2   | 0.1194 | 3.3 |
| 4/22/2018 17:35 | 4.7 | 22.6 | 2.3 | 2   | 0.1035 | 3.2 |
| 4/22/2018 17:36 | 5.5 | 24   | 2.4 | 2   | 0.1181 | 3.1 |
| 4/22/2018 17:37 | 5.5 | 24.2 | 2.6 | 2   | 0.1095 | 3.1 |
| 4/22/2018 17:38 | 4.5 | 23.7 | 2.4 | 2   | 0.1166 | 3.3 |
| 4/22/2018 17:39 | 5.1 | 24.2 | 2.5 | 2   | 0.115  | 3.3 |
| 4/22/2018 17:40 | 4   | 23.6 | 2.5 | 2   | 0.1107 | 3.3 |
| 4/22/2018 17:41 | 4.8 | 22.5 | 2.3 | 2   | 0.1246 | 3.3 |
| 4/22/2018 17:42 | 5.7 | 22.4 | 2.3 | 2   | 0.1069 | 3.3 |
| 4/22/2018 17:43 | 5.1 | 23   | 2.3 | 2   | 0.1196 | 3.3 |
| 4/22/2018 17:44 | 6.3 | 23.3 | 2.4 | 2   | 0.1113 | 3.2 |
| 4/22/2018 17:45 | 5.4 | 24.3 | 2.5 | 2.1 | 0.1122 | 3.4 |
| 4/22/2018 17:46 | 5.4 | 22.7 | 2.4 | 2.1 | 0.1176 | 3.4 |
| 4/22/2018 17:47 | 5.7 | 23.2 | 2.3 | 2.1 | 0.1082 | 3.5 |
| 4/22/2018 17:48 | 5.4 | 23.5 | 2.5 | 2.1 | 0.1207 | 3.5 |
| 4/22/2018 17:49 | 3.2 | 22.6 | 2.3 | 2.1 | 0.0991 | 3.6 |
| 4/22/2018 17:50 | 4   | 22.6 | 2.3 | 2.1 | 0.1162 | 3.6 |
| 4/22/2018 17:51 | 4.5 | 23.7 | 2.4 | 2.1 | 0.1076 | 3.7 |
| 4/22/2018 17:52 | 4.6 | 22.9 | 2.4 | 2.1 | 0.1158 | 3.5 |
| 4/22/2018 17:53 | 5.2 | 22.6 | 2.4 | 2.1 | 0.1106 | 3.4 |
| 4/22/2018 17:54 | 4.8 | 22.2 | 2.3 | 2.1 | 0.1147 | 3.4 |
| 4/22/2018 17:55 | 4.7 | 22.5 | 2.3 | 2.1 | 0.1212 | 3.6 |
| 4/22/2018 17:56 | 5.5 | 22.3 | 2.3 | 2.1 | 0.105  | 3.8 |
| 4/22/2018 17:57 | 5.6 |      | 2.4 | 2.1 | 0.1199 | 3.7 |
| 4/22/2018 17:58 | 4.8 | 23   | 2.4 | 2.1 | 0.1065 | 3.6 |
| 4/22/2018 17:59 | 5.2 | 23.4 | 2.5 | 2.1 | 0.1173 | 3.5 |
| 4/22/2018 18:00 | 5.5 | 23.2 | 2.5 | 2.1 | 0.1149 | 2.2 |
| 4/22/2018 18:01 | 5.5 | 23.4 | 2.5 | 2.1 | 0.1049 | 1.9 |
| 4/22/2018 18:02 | 4.3 | 23.7 | 2.5 | 2.1 | 0.1184 | 1.9 |
| 4/22/2018 18:03 | 5.8 | 23.2 | 2.5 | 2.1 | 0.107  | 1.9 |
| 4/22/2018 18:04 | 5.3 | 23.6 | 2.5 | 2   | 0.1211 | 2   |
| 4/22/2018 18:05 | 6   | 24.4 | 2.5 | 2   | 0.1016 | 2   |
| 4/22/2018 18:06 | 5.3 | 23.7 | 2.5 | 2   | 0.1187 | 2.1 |

|                 |     |      |     |     |        |     |
|-----------------|-----|------|-----|-----|--------|-----|
| 4/22/2018 18:07 | 5.6 | 23   | 2.5 | 2   | 0.1047 | 2.2 |
| 4/22/2018 18:08 | 4.3 | 22.5 | 2.4 | 2   | 0.1058 | 2.2 |
| 4/22/2018 18:09 | 3.5 | 22.7 | 2.4 | 2   | 0.1092 | 2.1 |
| 4/22/2018 18:10 | 5.6 | 22.8 | 2.4 | 2   | 0.1057 | 1.9 |
| 4/22/2018 18:11 | 3.7 | 22.7 | 2.4 | 2   | 0.1145 | 1.8 |
| 4/22/2018 18:12 | 5.4 | 23.3 | 2.4 | 2   | 0.1086 | 2   |
| 4/22/2018 18:13 | 5   | 23.8 | 2.5 | 2   | 0.1147 | 2   |
| 4/22/2018 18:14 | 4.4 | 23.1 | 2.4 | 2.1 | 0.1084 | 2.1 |
| 4/22/2018 18:15 | 5.1 | 23.6 | 2.4 | 2.1 | 0.1199 | 2.3 |
| 4/22/2018 18:16 | 5.8 | 23.9 | 2.5 | 2.1 | 0.1175 | 2.3 |
| 4/22/2018 18:17 | 4.7 | 22.7 | 2.4 | 2.1 | 0.1144 | 2.2 |
| 4/22/2018 18:18 | 4.5 | 23.1 | 2.4 | 2.1 | 0.1079 | 2.4 |
| 4/22/2018 18:19 | 4.9 | 22.6 | 2.4 | 2.1 | 0.0999 | 2.5 |
| 4/22/2018 18:20 | 5   | 22.6 | 2.4 | 2.1 | 0.1164 | 2.6 |
| 4/22/2018 18:21 | 4.9 | 22.8 | 2.4 | 2.1 | 0.1091 | 2.7 |
| 4/22/2018 18:22 | 4.7 | 22.7 | 2.4 | 2.2 | 0.1197 | 2.7 |
| 4/22/2018 18:23 | 6   | 22.7 | 2.4 | 2.2 | 0.1017 | 2.8 |
| 4/22/2018 18:24 | 4.7 | 23.3 | 2.5 | 2.2 | 0.1163 | 2.9 |
| 4/22/2018 18:25 | 5.2 | 23.2 | 2.5 | 2.2 | 0.1093 | 3.1 |
| 4/22/2018 18:26 | 5.9 | 23.8 | 2.5 | 2.2 | 0.1086 | 3.3 |
| 4/22/2018 18:27 | 6.6 | 23.4 | 2.5 | 2.1 | 0.1179 | 3.3 |
| 4/22/2018 18:28 | 4.6 | 23.3 | 2.5 | 2.1 | 0.1088 | 3.3 |
| 4/22/2018 18:29 | 4.4 | 23.9 | 2.5 | 2.1 | 0.1097 | 3.4 |
| 4/22/2018 18:30 | 5.9 | 23.7 | 2.5 | 2.1 | 0.1072 | 3.4 |
| 4/22/2018 18:31 | 5.8 | 24.4 | 2.5 | 2   | 0.1216 | 3.5 |
| 4/22/2018 18:32 | 6.8 | 24.5 | 2.4 | 2   | 0.1103 | 3.5 |
| 4/22/2018 18:33 | 4.3 | 24   | 2.4 | 2   | 0.114  | 3.4 |
| 4/22/2018 18:34 | 3.9 | 23.2 | 2.4 | 2   | 0.1021 | 3.5 |
| 4/22/2018 18:35 | 3.3 | 23.1 | 2.4 | 2   | 0.1171 | 3.4 |
| 4/22/2018 18:36 | 4.7 | 23.5 | 2.4 | 1.9 | 0.1121 | 3.5 |
| 4/22/2018 18:37 | 5.3 | 24.1 | 2.4 | 1.9 | 0.1135 | 3.4 |
| 4/22/2018 18:38 | 6.5 | 23.9 | 2.4 | 1.9 | 0.1152 | 3.4 |
| 4/22/2018 18:39 | 4.9 | 23.2 | 2.4 | 1.9 | 0.1162 | 3.4 |
| 4/22/2018 18:40 | 5.3 | 23.1 | 2.4 | 1.9 | 0.1091 | 3.4 |
| 4/22/2018 18:41 | 6.2 | 23.1 | 2.4 | 2   | 0.101  | 3.3 |
| 4/22/2018 18:42 | 4.4 | 23.2 | 2.4 | 2   | 0.1198 | 3.4 |
| 4/22/2018 18:43 | 5.5 | 22.9 | 2.4 | 2   | 0.0983 | 3.4 |
| 4/22/2018 18:44 | 4.1 | 23   | 2.4 | 2   | 0.117  | 3.5 |
| 4/22/2018 18:45 | 4.4 | 23.1 | 2.4 | 2   | 0.1056 | 3.3 |
| 4/22/2018 18:46 | 5.8 | 23.1 | 2.4 | 2   | 0.1098 | 3.3 |
| 4/22/2018 18:47 | 5.6 | 22.9 | 2.4 | 2.1 | 0.1153 | 3.3 |
| 4/22/2018 18:48 | 5.4 | 23.2 | 2.4 | 2.1 | 0.1032 | 2.5 |
| 4/22/2018 18:49 | 5.8 | 23   | 2.4 | 2.1 | 0.1134 | 1.9 |
| 4/22/2018 18:50 | 4.8 | 23   | 2.4 | 2.1 | 0.108  | 1.9 |
| 4/22/2018 18:51 | 4.4 | 23.2 | 2.4 | 2.1 | 0.1232 | 2   |
| 4/22/2018 18:52 | 4.3 | 23   | 2.4 | 2.1 | 0.1033 | 2.2 |
| 4/22/2018 18:53 | 4.7 | 23   | 2.4 | 2.1 | 0.1131 | 2.4 |



|                 |     |      |     |     |        |     |
|-----------------|-----|------|-----|-----|--------|-----|
| 4/22/2018 18:54 | 4.1 | 23.2 | 2.4 | 2   | 0.1022 | 2.6 |
| 4/22/2018 18:55 | 4.9 | 23.7 | 2.4 | 2   | 0.1163 | 2.7 |
| 4/22/2018 18:56 | 4.4 | 23.8 | 2.4 | 2   | 0.1039 | 2.9 |
| 4/22/2018 18:57 | 5.6 | 24   | 2.4 | 2   | 0.1073 | 2.9 |
| 4/22/2018 18:58 | 6.3 | 24.4 | 2.4 | 2   | 0.1122 | 2.9 |
| 4/22/2018 18:59 | 5.6 | 24.2 | 2.5 | 1.9 | 0.1042 | 2.9 |
| 4/22/2018 19:00 | 5.8 | 24.1 | 2.5 | 1.9 | 0.1085 | 3   |
| 4/22/2018 19:01 | 5.5 | 24   | 2.5 | 1.9 | 0.1076 | 3.1 |
| 4/22/2018 19:02 | 5.6 | 24.1 | 2.5 | 1.9 | 0.114  | 3.2 |
| 4/22/2018 19:03 | 5.9 | 24.7 | 2.5 | 1.9 | 0.1063 | 3.3 |
| 4/22/2018 19:04 | 6.3 | 24.9 | 2.5 | 1.9 | 0.1078 | 3.3 |
| 4/22/2018 19:05 | 7.7 | 26   | 2.5 | 1.9 | 0.1141 | 3.4 |
| 4/22/2018 19:06 | 4.5 | 24.1 | 2.5 | 1.9 | 0.1027 | 3.4 |
| 4/22/2018 19:07 | 5.4 | 23.6 | 2.4 | 1.9 | 0.1218 | 3.5 |
| 4/22/2018 19:08 | 5.1 | 23.8 | 2.4 | 1.9 | 0.103  | 3.6 |
| 4/22/2018 19:09 | 4.6 | 23.1 | 2.4 | 1.9 | 0.1145 | 3.5 |
| 4/22/2018 19:10 | 5.8 | 23.6 | 2.4 | 1.9 | 0.0962 | 3.6 |
| 4/22/2018 19:11 | 4   | 23.7 | 2.4 | 1.9 | 0.1069 | 3.5 |
| 4/22/2018 19:12 | 4.9 | 23.8 | 2.4 | 1.9 | 0.1158 | 3.5 |
| 4/22/2018 19:13 | 5.2 | 23.3 | 2.4 | 1.9 | 0.1073 | 3.3 |
| 4/22/2018 19:14 | 6.4 | 23.2 | 2.4 | 2   | 0.1176 | 3.1 |
| 4/22/2018 19:15 | 4.8 | 23.4 | 2.4 | 2   | 0.1111 | 3.1 |
| 4/22/2018 19:16 | 5.6 | 23.5 | 2.4 | 2   | 0.1179 | 2.9 |
| 4/22/2018 19:17 | 3.8 | 23.5 | 2.4 | 2   | 0.0975 | 2.6 |
| 4/22/2018 19:18 | 5.9 | 23.3 | 2.4 | 2   | 0.1069 | 2.6 |
| 4/22/2018 19:19 | 6.2 | 23.5 | 2.4 | 2   | 0.1152 | 2.6 |
| 4/22/2018 19:20 | 5.8 | 23.2 | 2.4 | 2   | 0.1075 | 2.8 |
| 4/22/2018 19:21 | 5.5 | 23.3 | 2.4 | 2   | 0.112  | 2.8 |
| 4/22/2018 19:22 | 6.1 | 23.2 | 2.4 | 2   | 0.116  | 2.8 |
| 4/22/2018 19:23 | 4.5 | 23.4 | 2.4 | 2   | 0.1121 | 2.8 |
| 4/22/2018 19:24 | 5.3 | 23.5 | 2.4 | 2   | 0.1064 | 2.9 |
| 4/22/2018 19:25 | 4.8 | 23.3 | 2.4 | 2   | 0.1159 | 2.9 |
| 4/22/2018 19:26 | 5.5 | 23.5 | 2.4 | 2   | 0.1067 | 3   |
| 4/22/2018 19:27 | 6.1 | 23.4 | 2.4 | 2   | 0.1126 | 2.9 |
| 4/22/2018 19:28 | 4.7 | 23.3 | 2.4 | 2   | 0.1025 | 2.6 |
| 4/22/2018 19:29 | 5.1 | 23.2 | 2.5 | 2   | 0.1104 | 2.6 |
| 4/22/2018 19:30 | 5.5 | 23.3 | 2.5 | 2   | 0.1183 | 2.7 |
| 4/22/2018 19:31 | 6   | 23.2 | 2.5 | 2   | 0.0999 | 2.8 |
| 4/22/2018 19:32 | 6.3 | 23.3 | 2.5 | 2   | 0.1167 | 2.8 |
| 4/22/2018 19:33 | 4.8 | 23.8 | 2.7 | 2   | 0.1076 | 2.8 |
| 4/22/2018 19:34 | 4   | 24   | 2.8 | 2   | 0.114  | 2.8 |
| 4/22/2018 19:35 | 5.7 | 23.8 | 2.9 | 2   | 0.1038 | 2.8 |
| 4/22/2018 19:36 | 5.4 | 24.1 | 3   | 2   | 0.1058 | 2.8 |
| 4/22/2018 19:37 | 5.3 | 23.9 | 3   | 1.9 | 0.1184 | 2.9 |
| 4/22/2018 19:38 | 4.1 | 23.9 | 3.1 | 1.9 | 0.1    | 2.9 |
| 4/22/2018 19:39 | 5.7 | 24.1 | 3.1 | 1.9 | 0.1127 | 2.9 |
| 4/22/2018 19:40 | 6.2 | 23.8 | 3   | 1.9 | 0.1    | 2.6 |

|                 |     |      |     |     |        |     |
|-----------------|-----|------|-----|-----|--------|-----|
| 4/22/2018 19:41 | 6.5 | 23.7 | 3   | 1.9 | 0.1209 | 2.3 |
| 4/22/2018 19:42 | 4.7 | 23.4 | 3.1 | 1.9 | 0.1034 | 2.2 |
| 4/22/2018 19:43 | 5.6 | 23.9 | 3.1 | 1.9 | 0.1161 | 2.1 |
| 4/22/2018 19:44 | 5.4 | 24.4 | 3.7 | 1.9 | 0.104  | 2.3 |
| 4/22/2018 19:45 | 4.7 | 23.2 | 3.1 | 1.9 | 0.1102 | 2.3 |
| 4/22/2018 19:46 | 3.4 | 23.2 | 3   | 1.9 | 0.1152 | 2.2 |
| 4/22/2018 19:47 | 4.7 | 23.6 | 3   | 2   | 0.1002 | 2.1 |
| 4/22/2018 19:48 | 5.6 | 23.5 | 3.1 | 2   | 0.1152 | 2   |
| 4/22/2018 19:49 | 5.7 | 23.2 | 3   | 2   | 0.0972 | 1.8 |
| 4/22/2018 19:50 | 4.4 | 23.3 | 3.1 | 2   | 0.1132 | 1.7 |
| 4/22/2018 19:51 | 5.1 | 23   | 3   | 2   | 0.1052 | 1.6 |
| 4/22/2018 19:52 | 4.7 | 23.1 | 3   | 2   | 0.1126 | 1.7 |
| 4/22/2018 19:53 | 4   | 23   | 3   | 2   | 0.0994 | 1.7 |
| 4/22/2018 19:54 | 5.9 | 23.2 | 3.1 | 2   | 0.1022 | 1.7 |
| 4/22/2018 19:55 | 5.3 | 23.1 | 3.1 | 2   | 0.1152 | 1.7 |
| 4/22/2018 19:56 | 3.7 | 23   | 3.1 | 2   | 0.0992 | 1.7 |
| 4/22/2018 19:57 | 4.5 | 23.3 | 3.1 | 2   | 0.115  | 1.7 |
| 4/22/2018 19:58 | 4.5 | 23.2 | 3.1 | 2   | 0.1007 | 1.7 |
| 4/22/2018 19:59 | 5.2 | 23.2 | 3.1 | 2   | 0.1017 | 1.7 |
| 4/22/2018 20:00 | 6.1 | 23.5 | 3.2 | 2   | 0.1067 | 1.7 |
| 4/22/2018 20:01 | 4.3 | 23.3 | 3.3 | 2   | 0.1014 | 1.7 |
| 4/22/2018 20:02 | 5.6 | 23.2 | 3.3 | 2   | 0.1133 | 1.6 |
| 4/22/2018 20:03 | 5.7 | 23.3 | 3.3 | 2   | 0.1006 | 1.5 |
| 4/22/2018 20:04 | 5.6 | 23.3 | 3.3 | 2   | 0.1113 | 1.5 |
| 4/22/2018 20:05 | 4.8 | 23.3 | 3.3 | 2   | 0.0996 | 1.5 |
| 4/22/2018 20:06 | 6.1 | 23.8 | 3.4 | 2   | 0.1091 | 1.5 |
| 4/22/2018 20:07 | 5.2 | 23.6 | 3.4 | 2   | 0.0999 | 1.6 |
| 4/22/2018 20:08 | 4.1 | 24.1 | 3.5 | 1.9 | 0.1048 | 1.6 |
| 4/22/2018 20:09 | 4.3 | 23.8 | 3.5 | 1.9 | 0.1078 | 1.7 |
| 4/22/2018 20:10 | 6   | 23.8 | 3.5 | 1.9 | 0.1019 | 1.7 |
| 4/22/2018 20:11 | 4.4 | 23.8 | 3.4 | 1.9 | 0.1103 | 1.7 |
| 4/22/2018 20:12 | 5.8 | 23.7 | 3.4 | 1.9 | 0.0994 | 1.7 |
| 4/22/2018 20:13 | 4.9 | 23.6 | 3.4 | 1.9 | 0.1077 | 1.7 |
| 4/22/2018 20:14 | 4.2 | 23.9 | 3.4 | 1.9 | 0.1011 | 1.7 |
| 4/22/2018 20:15 | 5.7 | 23.7 | 3.5 | 1.9 | 0.0987 | 1.4 |
| 4/22/2018 20:16 | 6.2 | 24   | 3.6 | 1.9 | 0.1064 | 1.5 |
| 4/22/2018 20:17 | 5.7 | 23.4 | 3.5 | 1.9 | 0.0958 | 1.5 |
| 4/22/2018 20:18 | 6.1 | 23.1 | 3.4 | 2   | 0.1062 | 1.5 |
| 4/22/2018 20:19 | 5.3 | 23.3 | 3.4 | 2   | 0.0971 | 1.4 |
| 4/22/2018 20:20 | 4   | 23.3 | 3.4 | 2   | 0.1102 | 1.5 |
| 4/22/2018 20:21 | 6   | 23.1 | 3.3 | 2   | 0.1011 | 1.5 |
| 4/22/2018 20:22 | 5.7 | 23.2 | 3.4 | 2   | 0.1088 | 1.5 |
| 4/22/2018 20:23 | 4.8 | 23.1 | 3.4 | 2   | 0.1008 | 1.4 |
| 4/22/2018 20:24 | 4.3 | 23   | 3.4 | 2   | 0.0963 | 1.4 |
| 4/22/2018 20:25 |     | 22.9 | 3.4 | 2   | 0.1142 | 1.4 |
| 4/22/2018 20:26 | 5.2 | 23.1 | 3.4 | 2   | 0.0986 | 1.4 |
| 4/22/2018 20:27 |     | 23.2 | 3.4 | 2   | 0.1046 | 1.4 |

|                 |      |      |     |     |        |     |
|-----------------|------|------|-----|-----|--------|-----|
| 4/22/2018 20:28 | 4.3  | 23   | 3.4 | 2   | 0.0985 | 1.4 |
| 4/22/2018 20:29 | 13.6 | 22.9 | 3.4 | 2   | 0.1005 | 1.4 |
| 4/22/2018 20:30 | 5.6  | 23.3 | 3.4 | 2   | 0.1019 | 1.4 |
| 4/22/2018 20:31 | 4.6  | 22.9 | 3.4 | 2   | 0.0974 | 1.4 |
| 4/22/2018 20:32 | 5.2  | 22.9 | 3.3 | 2   | 0.1084 | 1.5 |
| 4/22/2018 20:33 |      | 23   | 3.3 | 2   | 0.0976 | 1.5 |
| 4/22/2018 20:34 |      | 23   | 3.3 | 2   | 0.1097 | 1.5 |
| 4/22/2018 20:35 |      | 22.8 | 3.3 | 2   | 0.1031 | 1.5 |
| 4/22/2018 20:36 | 5.1  | 22.9 | 3.4 | 2   | 0.1034 | 1.5 |
| 4/22/2018 20:37 |      | 23.2 | 3.3 | 2   | 0.1035 | 1.5 |
| 4/22/2018 20:38 | 4.7  | 23.7 | 3.3 | 2   | 0.0997 | 1.5 |
| 4/22/2018 20:39 | 5.2  | 23.4 | 3.4 | 2   | 0.1133 | 1.5 |
| 4/22/2018 20:40 | 6.3  | 23.6 | 3.4 | 2   | 0.0947 | 1.4 |
| 4/22/2018 20:41 |      | 23.9 | 3.4 | 2   | 0.1094 | 1.5 |
| 4/22/2018 20:42 | 5.7  | 23.7 | 3.4 | 2   | 0.1045 | 1.5 |
| 4/22/2018 20:43 |      | 23.3 | 3.3 | 1.9 | 0.1056 | 1.5 |
| 4/22/2018 20:44 |      | 23.4 | 3.3 | 1.9 | 0.1055 | 1.5 |
| 4/22/2018 20:45 | 10.9 | 23.4 | 3.3 | 1.9 | 0.1011 | 1.5 |
| 4/22/2018 20:46 | 4.5  | 23.2 | 3.2 | 1.9 | 0.1189 | 1.5 |
| 4/22/2018 20:47 | 5.2  | 23.5 | 3.2 | 1.9 | 0.1047 | 1.5 |
| 4/22/2018 20:48 | 4.5  | 23.5 | 3.2 | 1.9 | 0.1142 | 1.5 |
| 4/22/2018 20:49 | 4.8  | 22.8 | 3.2 | 1.9 | 0.1074 | 1.6 |
| 4/22/2018 20:50 | 4.2  | 22.6 | 3.2 | 1.9 | 0.1064 | 1.6 |
| 4/22/2018 20:51 | 4    | 23.2 | 3.2 | 2   | 0.1198 | 1.5 |
| 4/22/2018 20:52 | 4.5  | 22.9 | 3.2 | 2   | 0.1012 | 1.5 |
| 4/22/2018 20:53 | 4.7  | 22.9 | 3.2 | 2   | 0.1127 | 1.5 |
| 4/22/2018 20:54 | 4.2  | 23.2 | 3.2 | 2   | 0.1081 | 1.5 |
| 4/22/2018 20:55 | 5.8  | 22.8 | 3.2 | 2   | 0.1077 | 1.5 |
| 4/22/2018 20:56 | 4.8  | 22.7 | 3.2 | 2   | 0.1077 | 1.5 |
| 4/22/2018 20:57 | 3.4  | 22.9 | 3.2 | 2   | 0.1109 | 1.6 |
| 4/22/2018 20:58 | 5.5  | 22.8 | 3.1 | 2   | 0.1127 | 1.6 |
| 4/22/2018 20:59 | 5.2  | 22.7 | 3.1 | 2   | 0.1012 | 1.6 |
| 4/22/2018 21:00 | 4.4  | 22.7 | 3.1 | 2   | 0.1094 | 1.6 |
| 4/22/2018 21:01 | 3.7  | 22.5 | 3.2 | 2   | 0.1078 | 1.7 |
| 4/22/2018 21:02 | 4.3  | 22.7 | 3.2 | 2   | 0.1105 | 1.7 |
| 4/22/2018 21:03 | 5    | 22.9 | 3.2 | 2   | 0.1129 | 1.7 |
| 4/22/2018 21:04 | 5.9  | 23.3 | 3.2 | 2   | 0.1042 | 1.7 |
| 4/22/2018 21:05 | 4.9  | 23.2 | 3.2 | 2   | 0.1169 | 1.8 |
| 4/22/2018 21:06 | 4.5  | 23.4 | 3.2 | 2   | 0.1023 | 1.8 |
| 4/22/2018 21:07 | 5.6  | 23.4 | 3.1 | 2   | 0.1167 | 1.7 |
| 4/22/2018 21:08 | 5.4  | 23.2 | 3.1 | 2   | 0.1062 | 1.8 |
| 4/22/2018 21:09 | 5.3  | 23   | 3.1 | 2   | 0.1044 | 1.8 |
| 4/22/2018 21:10 | 5.3  | 23.2 | 3.1 | 2   | 0.111  | 1.8 |
| 4/22/2018 21:11 | 5.5  | 23.3 | 3.1 | 2   | 0.1117 | 1.8 |
| 4/22/2018 21:12 | 6.2  | 23.3 | 3.1 | 2   | 0.1103 | 1.8 |
| 4/22/2018 21:13 | 6.4  | 23.9 | 3   | 1.9 | 0.1008 | 1.9 |
| 4/22/2018 21:14 | 5.1  | 23.7 | 3   | 1.9 | 0.1147 | 1.9 |

|                 |     |      |     |     |        |     |
|-----------------|-----|------|-----|-----|--------|-----|
| 4/22/2018 21:15 | 4.5 | 23   | 3   | 1.9 | 0.107  | 1.9 |
| 4/22/2018 21:16 | 4.8 | 22.6 | 3   | 1.9 | 0.1144 | 1.9 |
| 4/22/2018 21:17 | 5.6 | 23.2 | 3   | 1.9 | 0.112  | 2   |
| 4/22/2018 21:18 | 4.5 | 22.8 | 3   | 1.9 | 0.1078 | 2   |
| 4/22/2018 21:19 | 5.1 | 22.7 | 3   | 1.9 | 0.1185 | 2.1 |
| 4/22/2018 21:20 | 4.7 | 22.3 | 3   | 1.9 | 0.102  | 2.1 |
| 4/22/2018 21:21 | 3.9 | 22.8 | 3   | 1.9 | 0.1179 | 2.1 |
| 4/22/2018 21:22 | 4.1 | 22.5 | 3   | 2   | 0.1025 | 2.1 |
| 4/22/2018 21:23 | 5.2 | 22.6 | 3   | 2   | 0.1152 | 2.2 |
| 4/22/2018 21:24 | 4.3 | 22.7 | 3   | 2   | 0.1074 | 2.1 |
| 4/22/2018 21:25 | 4.5 | 22.3 | 2.9 | 2   | 0.1047 | 2.2 |
| 4/22/2018 21:26 | 5.6 | 22.5 | 3   | 2   | 0.1135 | 2.1 |
| 4/22/2018 21:27 | 5.3 | 22.5 | 3   | 2   | 0.1001 | 2.1 |
| 4/22/2018 21:28 | 4.7 | 22.6 | 2.9 | 2   | 0.1151 | 2.1 |
| 4/22/2018 21:29 | 4   | 22.5 | 2.9 | 2.1 | 0.1102 | 2.3 |
| 4/22/2018 21:30 | 3.6 | 22.8 | 2.9 | 2.1 | 0.1155 | 2.3 |
| 4/22/2018 21:31 | 4.1 | 22.2 | 2.9 | 2.1 | 0.1111 | 2.3 |
| 4/22/2018 21:32 | 2.8 | 22.6 | 2.9 | 2.1 | 0.1025 | 2.3 |
| 4/22/2018 21:33 | 4.3 | 22.6 | 2.9 | 2.1 | 0.1149 | 2.3 |
| 4/22/2018 21:34 | 5   | 22.7 | 2.9 | 2.1 | 0.1043 | 2.2 |
| 4/22/2018 21:35 | 4.5 | 22.5 | 2.9 | 2.1 | 0.1179 | 2.2 |
| 4/22/2018 21:36 | 5.5 | 22.9 | 2.9 | 2.1 | 0.1036 | 2.2 |
| 4/22/2018 21:37 | 4.4 | 22.7 | 2.9 | 2   | 0.112  | 2.3 |
| 4/22/2018 21:38 | 4.6 | 22.7 | 2.9 | 2   | 0.1043 | 2.4 |
| 4/22/2018 21:39 | 6.1 | 22.7 | 2.8 | 2   | 0.1091 | 2.4 |
| 4/22/2018 21:40 | 5.3 | 22.5 | 2.8 | 2   | 0.1116 | 2.4 |
| 4/22/2018 21:41 | 4.3 | 22.5 | 2.8 | 2   | 0.1039 | 2.4 |
| 4/22/2018 21:42 | 5   | 22.5 | 2.8 | 2   | 0.1144 | 2.5 |
| 4/22/2018 21:43 | 4.1 | 23.4 | 2.8 | 2   | 0.1    | 2.6 |
| 4/22/2018 21:44 | 5.7 | 24.4 | 2.9 | 2   | 0.1159 | 2.5 |
| 4/22/2018 21:45 | 4.3 | 22.8 | 2.8 | 1.9 | 0.1068 | 2.5 |
| 4/22/2018 21:46 | 5.2 | 22.4 | 2.8 | 1.9 | 0.1064 | 2.5 |
| 4/22/2018 21:47 | 4.7 | 22.3 | 2.8 | 1.9 | 0.1115 | 2.6 |
| 4/22/2018 21:48 | 5.4 | 22.3 | 2.8 | 1.9 | 0.1033 | 2.6 |
| 4/22/2018 21:49 | 4.6 | 22.4 | 2.8 | 1.9 | 0.1142 | 2.7 |
| 4/22/2018 21:50 | 4.2 | 21.9 | 2.8 | 2   | 0.1045 | 2.7 |
| 4/22/2018 21:51 | 4.2 | 22.2 | 2.8 | 2   | 0.1198 | 2.8 |
| 4/22/2018 21:52 | 5.4 | 22.1 | 2.7 | 2   | 0.108  | 2.8 |
| 4/22/2018 21:53 | 5.7 | 22.2 | 2.7 | 2   | 0.1018 | 2.8 |
| 4/22/2018 21:54 | 4.8 | 22.1 | 2.7 | 2.1 | 0.1176 | 2.8 |
| 4/22/2018 21:55 | 4.2 | 22.2 | 2.7 | 2.1 | 0.097  | 2.7 |
| 4/22/2018 21:56 | 5.7 | 22.6 | 2.8 | 2.1 | 0.1121 | 2.7 |
| 4/22/2018 21:57 | 4   | 22.6 | 2.8 | 2   | 0.0986 | 2.8 |
| 4/22/2018 21:58 | 4.6 | 22.6 | 2.8 | 2   | 0.108  | 2.8 |
| 4/22/2018 21:59 | 4.5 | 22.5 | 2.8 | 2   | 0.1112 | 2.9 |
| 4/22/2018 22:00 | 4.5 | 22.3 | 2.8 | 2   | 0.1044 | 3   |
| 4/22/2018 22:01 | 5.1 | 22.4 | 2.8 | 2   | 0.1101 | 3   |

|                 |     |      |     |     |        |     |
|-----------------|-----|------|-----|-----|--------|-----|
| 4/22/2018 22:02 | 4.7 | 22.5 | 2.9 | 2   | 0.1002 | 3   |
| 4/22/2018 22:03 | 4.1 | 22.5 | 2.9 | 2   | 0.1141 | 3.1 |
| 4/22/2018 22:04 | 5.2 | 22.2 | 2.9 | 2   | 0.0993 | 3.1 |
| 4/22/2018 22:05 | 4.6 | 22.3 | 2.9 | 2   | 0.1126 | 2.8 |
| 4/22/2018 22:06 | 4.6 | 22.7 | 3   | 2   | 0.1    | 2.5 |
| 4/22/2018 22:07 | 5.4 | 22.9 | 3   | 2   | 0.1134 | 2.5 |
| 4/22/2018 22:08 | 3.6 | 23.2 | 3.2 | 2   | 0.1024 | 2.5 |
| 4/22/2018 22:09 | 4.1 | 22.5 | 3.2 | 2   | 0.1051 | 2.5 |
| 4/22/2018 22:10 | 4.8 | 22.1 | 2.9 | 1.9 | 0.1158 | 2.7 |
| 4/22/2018 22:11 | 5.8 | 22.3 | 2.9 | 2   | 0.0962 | 2.9 |
| 4/22/2018 22:12 | 4.3 | 22.1 | 2.9 | 1.9 | 0.1178 | 2.9 |
| 4/22/2018 22:13 | 5.1 | 21.9 | 2.9 | 1.9 | 0.1055 | 3   |
| 4/22/2018 22:14 | 4.8 | 22   | 2.8 | 2   | 0.1076 | 3.1 |
| 4/22/2018 22:15 | 4.6 | 22   | 2.8 | 2   | 0.1101 | 3.2 |
| 4/22/2018 22:16 | 5.8 | 22   | 2.8 | 2   | 0.1021 | 3.2 |
| 4/22/2018 22:17 | 4.4 | 21.7 | 2.8 | 2.1 | 0.1177 | 3.2 |
| 4/22/2018 22:18 | 5.3 | 21.8 | 2.9 | 2.1 | 0.1021 | 3.3 |
| 4/22/2018 22:19 | 5   | 22   | 2.9 | 2.1 | 0.1221 | 3.4 |
| 4/22/2018 22:20 | 4.6 | 22.1 | 3   | 2.1 | 0.1027 | 3.4 |
| 4/22/2018 22:21 | 4.7 | 22.2 | 3.1 | 2.1 | 0.1127 | 3.3 |
| 4/22/2018 22:22 | 6   | 21.9 | 3   | 2.1 | 0.1051 | 3.3 |
| 4/22/2018 22:23 | 4   | 22.3 | 3.1 | 2   | 0.0996 | 3.4 |
| 4/22/2018 22:24 | 5.1 | 22.2 | 3   | 2   | 0.1128 | 3.3 |
| 4/22/2018 22:25 | 4.2 | 22.4 | 3.1 | 2   | 0.1016 | 3.3 |
| 4/22/2018 22:26 | 4.6 | 22.2 | 3.1 | 2   | 0.1108 | 3.4 |
| 4/22/2018 22:27 | 3.7 | 22.1 | 3   | 2   | 0.1028 | 3.5 |
| 4/22/2018 22:28 | 4.4 | 22.1 | 3   | 2   | 0.1123 | 3.5 |
| 4/22/2018 22:29 | 4.5 | 22.2 | 3   | 2   | 0.1101 | 3.5 |
| 4/22/2018 22:30 | 4.9 | 22   | 3   | 2   | 0.1069 | 3.3 |
| 4/22/2018 22:31 | 4.6 | 21.9 | 3   | 2   | 0.1173 | 3.4 |
| 4/22/2018 22:32 | 4.7 | 21.8 | 3   | 2   | 0.0984 | 3.5 |
| 4/22/2018 22:33 | 5.1 | 21.8 | 3   | 2   | 0.1111 | 3.3 |
| 4/22/2018 22:34 | 5.1 | 21.9 | 3.1 | 2   | 0.1018 | 3.2 |
| 4/22/2018 22:35 | 3.9 | 22   | 3   | 2   | 0.108  | 2.9 |
| 4/22/2018 22:36 | 3.4 | 21.9 | 3   | 2   | 0.1132 | 2.8 |
| 4/22/2018 22:37 | 3.7 | 21.9 | 3   | 2   | 0.1031 | 2.6 |
| 4/22/2018 22:38 | 5.3 | 21.9 | 3.1 | 2   | 0.1127 | 2.6 |
| 4/22/2018 22:39 | 4.2 | 22.2 | 3.1 | 2   | 0.0956 | 2.6 |
| 4/22/2018 22:40 | 4.7 | 22.2 | 3.1 | 2   | 0.113  | 2.5 |
| 4/22/2018 22:41 | 5   | 22.1 | 3.1 | 2   | 0.1008 | 2.6 |
| 4/22/2018 22:42 | 4.3 | 21.9 | 3   | 2   | 0.1062 | 2.6 |
| 4/22/2018 22:43 | 5.2 | 22   | 3   | 2   | 0.1104 | 2.6 |
| 4/22/2018 22:44 | 3.3 | 21.9 | 3   | 2   | 0.0974 | 2.7 |
| 4/22/2018 22:45 | 4.2 | 22.3 | 3.1 | 2   | 0.1188 | 2.7 |
| 4/22/2018 22:46 | 6   | 22.3 | 3.2 | 2   | 0.102  | 2.7 |
| 4/22/2018 22:47 | 4.9 | 22.1 | 3.3 | 2   | 0.1137 | 2.8 |
| 4/22/2018 22:48 | 3.6 | 21.6 | 3   | 2   | 0.1052 | 2.9 |

|                 |     |      |     |     |        |     |
|-----------------|-----|------|-----|-----|--------|-----|
| 4/22/2018 22:49 | 3.2 | 21.6 | 3   | 2   | 0.1033 | 3.1 |
| 4/22/2018 22:50 | 4.3 | 21.6 | 3.1 | 2   | 0.1082 | 2.8 |
| 4/22/2018 22:51 | 4.3 | 21.4 | 3   | 2   | 0.1019 | 2.5 |
| 4/22/2018 22:52 | 3.9 | 21.7 | 3   | 2   | 0.1128 | 2.8 |
| 4/22/2018 22:53 | 4.1 | 21.6 | 3   | 2   | 0.0989 | 3   |
| 4/22/2018 22:54 | 3.4 | 21.4 | 3   | 2   | 0.1126 | 3   |
| 4/22/2018 22:55 | 4.5 | 21.6 | 3   | 2   | 0.1054 | 3.1 |
| 4/22/2018 22:56 | 3.8 | 21.6 | 3   | 2.1 | 0.1164 | 3.2 |
| 4/22/2018 22:57 | 3.8 | 21.3 | 3   | 2.1 | 0.1136 | 3.2 |
| 4/22/2018 22:58 | 4.7 | 21.6 | 3.1 | 2.1 | 0.1104 | 3.1 |
| 4/22/2018 22:59 | 3.8 | 21.8 | 3.2 | 2.1 | 0.1133 | 3.1 |
| 4/22/2018 23:00 | 4.4 | 21.6 | 3.3 | 2   | 0.1036 | 3.2 |
| 4/22/2018 23:01 | 4.5 | 22   | 3.3 | 2   | 0.113  | 3.2 |
| 4/22/2018 23:02 | 3.7 | 21.9 | 3.3 | 2   | 0.1015 | 3.2 |
| 4/22/2018 23:03 | 3.5 | 22.1 | 3.5 | 2   | 0.1101 | 3.3 |
| 4/22/2018 23:04 | 4.6 | 22   | 3.5 | 2   | 0.1076 | 3.3 |
| 4/22/2018 23:05 | 5.9 | 21.6 | 3.3 | 2   | 0.106  | 3.2 |
| 4/22/2018 23:06 | 3.2 | 21.5 | 3.3 | 2   | 0.1128 | 3.1 |
| 4/22/2018 23:07 | 3.5 | 21.5 | 3.4 | 2   | 0.1082 | 3.1 |
| 4/22/2018 23:08 | 4.5 | 21.9 | 3.4 | 2   | 0.1206 | 3.2 |
| 4/22/2018 23:09 | 4.2 | 22.3 | 3.7 | 1.9 | 0.0991 | 3.2 |
| 4/22/2018 23:10 | 4.5 | 21.6 | 3.5 | 1.9 | 0.1166 | 3.1 |
| 4/22/2018 23:11 | 4.4 | 21.4 | 3.3 | 2   | 0.109  | 3.3 |
| 4/22/2018 23:12 | 4.2 | 21.4 | 3.3 | 2   | 0.1111 | 3.4 |
| 4/22/2018 23:13 | 3.7 | 21.6 | 3.3 | 2   | 0.1062 | 3.4 |
| 4/22/2018 23:14 | 4.2 | 21.5 | 3.3 | 2   | 0.0995 | 3.4 |
| 4/22/2018 23:15 | 5.6 | 21.3 | 3.3 | 2   | 0.1104 | 3.4 |
| 4/22/2018 23:16 | 4.9 | 21.4 | 3.3 | 2   | 0.0945 | 3.4 |
| 4/22/2018 23:17 | 4.5 | 21.4 | 3.2 | 2   | 0.1178 | 3.2 |
| 4/22/2018 23:18 | 4.9 | 21.5 | 3.3 | 2   | 0.1032 | 3.2 |
| 4/22/2018 23:19 | 7.3 | 21.6 | 3.3 | 2   | 0.1136 | 3.3 |
| 4/22/2018 23:20 |     | 21.5 | 3.4 | 2   | 0.1075 | 3.5 |
| 4/22/2018 23:21 | 7.7 | 21.7 | 3.4 | 2   | 0.1078 | 3.5 |
| 4/22/2018 23:22 | 9.5 | 21.6 | 3.4 | 2   | 0.111  | 3.6 |
| 4/22/2018 23:23 | 4   | 22.2 | 3.4 | 2   | 0.1008 | 3.6 |
| 4/22/2018 23:24 | 3.7 | 21.5 | 3.3 | 2   | 0.1106 | 3.7 |
| 4/22/2018 23:25 | 4   | 21.5 | 3.3 | 2   | 0.0991 | 3.7 |
| 4/22/2018 23:26 | 4.6 | 21.4 | 3.3 | 2   | 0.1123 | 3.8 |
| 4/22/2018 23:27 | 4.7 | 21.6 | 3.3 | 2   | 0.104  | 3.8 |
| 4/22/2018 23:28 |     | 21.7 | 3.3 | 2   | 0.1076 | 3.5 |
| 4/22/2018 23:29 |     | 21.7 | 3.3 | 2   | 0.1091 | 3.6 |
| 4/22/2018 23:30 | 8.1 | 21.7 | 3.3 | 2   | 0.1095 | 3.8 |
| 4/22/2018 23:31 | 4.7 | 21.9 | 3.4 | 2   | 0.1112 | 3.6 |
| 4/22/2018 23:32 |     | 21.3 | 3.3 | 2   | 0.097  | 3.4 |
| 4/22/2018 23:33 | 5.3 | 21.7 | 3.3 | 2   | 0.1191 | 3.5 |
| 4/22/2018 23:34 | 5   | 21.5 | 3.3 | 2   | 0.1017 | 3.7 |
| 4/22/2018 23:35 |     | 21.8 | 3.2 | 2   | 0.1084 | 3.8 |

|                 |     |      |     |     |        |     |
|-----------------|-----|------|-----|-----|--------|-----|
| 4/22/2018 23:36 | 4.4 | 21.5 | 3.2 | 2   | 0.1107 | 3.9 |
| 4/22/2018 23:37 | 4.8 | 21.6 | 3.2 | 2   | 0.1062 | 3.7 |
| 4/22/2018 23:38 | 4.8 | 21.2 | 3.2 | 2   | 0.1105 | 3.7 |
| 4/22/2018 23:39 | 4   | 21.3 | 3.2 | 2.1 | 0.0988 | 3.8 |
| 4/22/2018 23:40 | 5.9 | 21.4 | 3.3 | 2.1 | 0.1165 | 3.9 |
| 4/22/2018 23:41 | 4.8 | 21.9 | 3.3 | 2.1 | 0.0989 | 3.8 |
| 4/22/2018 23:42 | 5.8 | 21.7 | 3.3 | 2   | 0.1156 | 3.9 |
| 4/22/2018 23:43 | 3.4 | 21.2 | 3.2 | 2   | 0.1077 | 3.9 |
| 4/22/2018 23:44 | 3.1 | 21.5 | 3.2 | 2   | 0.105  | 4   |
| 4/22/2018 23:45 | 3.7 | 21.4 | 3.2 | 2   | 0.1022 | 3.9 |
| 4/22/2018 23:46 | 4.8 | 21.7 | 3.2 | 2   | 0.1015 | 3.9 |
| 4/22/2018 23:47 | 4.3 | 21.6 | 3.2 | 2   | 0.1166 | 3.8 |
| 4/22/2018 23:48 | 5.3 | 22.1 | 3.2 | 2   | 0.1003 | 3.7 |
| 4/22/2018 23:49 | 5.5 | 21.9 | 3.2 | 2   | 0.1138 | 3.6 |
| 4/22/2018 23:50 | 4.5 | 21.8 | 3.2 | 2   | 0.0974 | 3.3 |
| 4/22/2018 23:51 | 3.4 | 21.6 | 3.2 | 2   | 0.114  | 3.4 |
| 4/22/2018 23:52 | 4.8 | 21.6 | 3.2 | 2   | 0.101  | 3.4 |
| 4/22/2018 23:53 | 3.4 | 21.7 | 3.1 | 2   | 0.1127 | 3.5 |
| 4/22/2018 23:54 | 4.4 | 21.5 | 3.1 | 2   | 0.1145 | 3.6 |
| 4/22/2018 23:55 | 4.8 | 21.7 | 3.1 | 2   | 0.1029 | 3.6 |
| 4/22/2018 23:56 | 4.2 | 21.4 | 3.1 | 2   | 0.1146 | 3.7 |
| 4/22/2018 23:57 | 2.6 | 21.6 | 3.1 | 2   | 0.0985 | 3.8 |
| 4/22/2018 23:58 | 2.9 | 21.4 | 3.1 | 2   | 0.1069 | 3.7 |
| 4/22/2018 23:59 | 4.2 | 21.3 | 3.1 | 2   | 0.1015 | 3.6 |
| 4/23/2018 0:00  | 4   | 21.4 | 3.1 | 2   | 0.1073 | 3.7 |
| 4/23/2018 0:01  | 4.8 | 21.8 | 3.1 | 2   | 0.1078 | 3.7 |
| 4/23/2018 0:02  | 5.3 | 21.9 | 3.1 | 2   | 0.1034 | 3.6 |
| 4/23/2018 0:03  | 4.6 | 22.6 | 3.1 | 2   | 0.1115 | 3.6 |
| 4/23/2018 0:04  | 3.7 | 21.4 | 3.1 | 2   | 0.0983 | 3.6 |
| 4/23/2018 0:05  | 4.5 | 21.6 | 3.2 | 1.9 | 0.115  | 3.7 |
| 4/23/2018 0:06  | 4.3 | 21.6 | 3.1 | 1.9 | 0.1012 | 3.7 |
| 4/23/2018 0:07  | 4.6 | 21.8 | 3.1 | 1.9 | 0.1166 | 3.7 |
| 4/23/2018 0:08  | 3.6 | 21.8 | 3.1 | 1.9 | 0.1041 | 3.8 |
| 4/23/2018 0:09  | 4.4 | 22   | 3.2 | 1.9 | 0.1083 | 3.7 |
| 4/23/2018 0:10  | 3.3 | 21.4 | 3.1 | 1.9 | 0.1133 | 3.4 |
| 4/23/2018 0:11  | 4.3 | 21.6 | 3.1 | 1.9 | 0.1061 | 3.5 |
| 4/23/2018 0:12  | 4.5 | 21.5 | 3.1 | 2   | 0.1145 | 3.6 |
| 4/23/2018 0:13  | 3.4 | 21.7 | 3.1 | 2   | 0.1012 | 3.6 |
| 4/23/2018 0:14  | 3.9 | 21.5 | 3.1 | 2   | 0.1177 | 3.5 |
| 4/23/2018 0:15  | 3.3 | 21.8 | 3.1 | 2   | 0.1006 | 3.5 |
| 4/23/2018 0:16  | 2.4 | 21.4 | 3.1 | 2   | 0.112  | 3.5 |
| 4/23/2018 0:17  | 5.3 | 21.4 | 3   | 2   | 0.1041 | 3.6 |
| 4/23/2018 0:18  | 4.1 | 21.5 | 3   | 2   | 0.1098 | 3.7 |
| 4/23/2018 0:19  | 4.5 | 21.5 | 3.1 | 2   | 0.1147 | 3.7 |
| 4/23/2018 0:20  | 5.2 | 21.7 | 3.1 | 2   | 0.0931 | 3.7 |
| 4/23/2018 0:21  | 4.7 | 21.8 | 3.1 | 2   | 0.1082 | 3.7 |
| 4/23/2018 0:22  | 5.3 | 21.8 | 3.1 | 2   | 0.0952 | 3.8 |

|                |     |      |     |     |        |     |
|----------------|-----|------|-----|-----|--------|-----|
| 4/23/2018 0:23 | 3.7 | 22.1 | 3.2 | 2   | 0.1111 | 3.8 |
| 4/23/2018 0:24 | 3.8 | 21.8 | 3.1 | 1.9 | 0.1045 | 3.9 |
| 4/23/2018 0:25 | 4.1 | 21.7 | 3.1 | 1.9 | 0.106  | 3.9 |
| 4/23/2018 0:26 | 3.3 | 21.5 | 3.1 | 1.9 | 0.0979 | 3.8 |
| 4/23/2018 0:27 | 5.1 | 21.4 | 3.1 | 1.9 | 0.1015 | 3.9 |
| 4/23/2018 0:28 | 3.8 | 21.8 | 3.2 | 1.9 | 0.1108 | 4   |
| 4/23/2018 0:29 | 4.5 | 21.3 | 3.1 | 1.9 | 0.101  | 3.9 |
| 4/23/2018 0:30 | 4.7 | 21.7 | 3.1 | 1.9 | 0.1105 | 3.9 |
| 4/23/2018 0:31 | 5.8 | 21.6 | 3.1 | 1.9 | 0.1048 | 4   |
| 4/23/2018 0:32 | 3.2 | 21.6 | 3   | 1.9 | 0.1115 | 4   |
| 4/23/2018 0:33 | 5.2 | 21.4 | 3.1 | 1.9 | 0.1053 | 3.8 |
| 4/23/2018 0:34 | 3.6 | 21.5 | 3   | 1.9 | 0.1071 | 3.7 |
| 4/23/2018 0:35 | 4.7 | 21.3 | 3   | 1.9 | 0.1155 | 3.8 |
| 4/23/2018 0:36 | 3.8 | 21.3 | 3   | 2   | 0.0974 | 3.9 |
| 4/23/2018 0:37 | 4   | 21.3 | 3   | 2   | 0.1098 | 3.9 |
| 4/23/2018 0:38 | 4   | 21.2 | 3.1 | 1.9 | 0.0949 | 4   |
| 4/23/2018 0:39 | 4.3 | 21.6 | 3.1 | 1.9 | 0.1071 | 3.9 |
| 4/23/2018 0:40 | 4   | 21.5 | 3.1 | 1.9 | 0.0974 | 4   |
| 4/23/2018 0:41 | 3.7 | 21.7 | 3.1 | 1.9 | 0.1049 | 3.9 |
| 4/23/2018 0:42 | 5.1 | 21.6 | 3.1 | 1.9 | 0.1071 | 2.8 |
| 4/23/2018 0:43 | 4.9 | 21.5 | 3.1 | 1.9 | 0.1066 | 1.5 |
| 4/23/2018 0:44 | 5.2 | 21.5 | 3.1 | 1.9 | 0.1178 | 1.6 |
| 4/23/2018 0:45 | 3.8 | 21.6 | 3.1 | 1.9 | 0.096  | 1.7 |
| 4/23/2018 0:46 | 4.7 | 21.4 | 3.1 | 1.9 | 0.1066 | 1.7 |
| 4/23/2018 0:47 | 4.1 | 21.6 | 3.2 | 2   | 0.1089 | 1.9 |
| 4/23/2018 0:48 | 3.6 | 21.4 | 3.2 | 1.9 | 0.102  | 2   |
| 4/23/2018 0:49 | 4.4 | 21.1 | 3.1 | 1.9 | 0.1043 | 2.2 |
| 4/23/2018 0:50 | 3.3 | 21.1 | 3.1 | 1.9 | 0.1009 | 2.3 |
| 4/23/2018 0:51 | 4.5 | 21.2 | 3.1 | 2   | 0.1187 | 2.5 |
| 4/23/2018 0:52 | 4.6 | 20.9 | 3.1 | 2   | 0.0933 | 2.6 |
| 4/23/2018 0:53 | 3.4 | 21.1 | 3.1 | 2   | 0.1141 | 2.2 |
| 4/23/2018 0:54 | 3.7 | 21   | 3   | 2   | 0.1046 | 2.3 |
| 4/23/2018 0:55 | 4.1 | 21.3 | 3.1 | 2   | 0.1059 | 2.6 |
| 4/23/2018 0:56 | 5   | 21.2 | 3.2 | 2   | 0.1136 | 2.7 |
| 4/23/2018 0:57 | 5.2 | 21.1 | 3.3 | 2   | 0.0967 | 2.7 |
| 4/23/2018 0:58 | 3.5 | 21.4 | 3.3 | 2   | 0.1084 | 2.7 |
| 4/23/2018 0:59 | 4.8 | 21.2 | 3.3 | 2   | 0.0984 | 2.3 |
| 4/23/2018 1:00 | 4.5 | 21.2 | 3.2 | 2   | 0.1141 | 2.1 |
| 4/23/2018 1:01 | 5.6 | 21.3 | 3.2 | 2   | 0.1047 | 2.1 |
| 4/23/2018 1:02 | 4.1 | 21.1 | 3.3 | 2   | 0.1027 | 2.1 |
| 4/23/2018 1:03 | 4.8 | 21   | 3.3 | 2   | 0.1057 | 2.1 |
| 4/23/2018 1:04 | 3.2 | 21.3 | 3.3 | 2   | 0.1039 | 2.1 |
| 4/23/2018 1:05 | 4   | 21.3 | 3.4 | 2   | 0.1135 | 2.2 |
| 4/23/2018 1:06 | 4   | 21.3 | 3.6 | 2   | 0.0992 | 2.1 |
| 4/23/2018 1:07 | 5   | 21.1 | 3.4 | 2   | 0.1132 | 2.1 |
| 4/23/2018 1:08 | 3.6 | 21.3 | 3.5 | 2   | 0.1007 | 2.3 |
| 4/23/2018 1:09 | 1.9 | 21.2 | 3.4 | 2   | 0.1048 | 2.4 |



|                |     |      |     |     |        |     |
|----------------|-----|------|-----|-----|--------|-----|
| 4/23/2018 1:10 | 4.6 | 21.6 | 3.5 | 1.9 | 0.1031 | 2.3 |
| 4/23/2018 1:11 | 5.6 | 21.2 | 3.7 | 1.9 | 0.0979 | 1.6 |
| 4/23/2018 1:12 | 2.4 | 21.2 | 3.3 | 1.9 | 0.1061 | 1.6 |
| 4/23/2018 1:13 | 4.6 | 21   | 3.3 | 1.9 | 0.0942 | 1.5 |
| 4/23/2018 1:14 | 3.6 | 21.1 | 3.3 | 2   | 0.1155 | 1.6 |
| 4/23/2018 1:15 | 4.7 | 20.9 | 3.4 | 2   | 0.1022 | 1.7 |
| 4/23/2018 1:16 | 4.2 | 21   | 3.5 | 2   | 0.1074 | 1.9 |
| 4/23/2018 1:17 | 2.9 | 21.6 | 3.5 | 2   | 0.1098 | 2.2 |
| 4/23/2018 1:18 | 3.8 | 21.4 | 3.6 | 1.9 | 0.1047 | 2.4 |
| 4/23/2018 1:19 | 3.8 | 21.2 | 3.6 | 1.9 | 0.1147 | 2.6 |
| 4/23/2018 1:20 | 4.3 | 21   | 3.4 | 1.9 | 0.1032 | 2.7 |
| 4/23/2018 1:21 | 4.3 | 21.2 | 3.4 | 1.9 | 0.1122 | 2.7 |
| 4/23/2018 1:22 | 4.1 | 21.4 | 3.5 | 1.9 | 0.1003 | 2.8 |
| 4/23/2018 1:23 | 3.6 | 21.1 | 3.5 | 1.9 | 0.1085 | 2.7 |
| 4/23/2018 1:24 | 4.1 | 21.1 | 3.5 | 1.9 | 0.1045 | 2.8 |
| 4/23/2018 1:25 | 4.7 | 21   | 3.4 | 1.9 | 0.1005 | 2.8 |
| 4/23/2018 1:26 | 4.6 | 21.2 | 3.5 | 1.9 | 0.1152 | 2.9 |
| 4/23/2018 1:27 | 3.9 | 21.2 | 3.4 | 1.9 | 0.102  | 3.1 |
| 4/23/2018 1:28 | 3.6 | 21.1 | 3.3 | 1.9 | 0.1138 | 3.2 |
| 4/23/2018 1:29 | 3   | 21.2 | 3.4 | 1.9 | 0.1076 | 3.4 |
| 4/23/2018 1:30 | 3.5 | 20.8 | 3.4 | 2   | 0.113  | 3.4 |
| 4/23/2018 1:31 | 3.7 | 21   | 3.3 | 2   | 0.1037 | 3.5 |
| 4/23/2018 1:32 | 3.3 | 20.9 | 3.4 | 2   | 0.1005 | 3.5 |
| 4/23/2018 1:33 | 4.4 | 21.1 | 3.4 | 2   | 0.1105 | 3.5 |
| 4/23/2018 1:34 | 5.2 | 21.1 | 3.4 | 2   | 0.1029 | 3.6 |
| 4/23/2018 1:35 | 3.7 | 21   | 3.4 | 2   | 0.1146 | 3.6 |
| 4/23/2018 1:36 | 5.1 | 21.4 | 3.4 | 2   | 0.1073 | 3.7 |
| 4/23/2018 1:37 | 3.1 | 21   | 3.4 | 2   | 0.1176 | 3.7 |
| 4/23/2018 1:38 | 4.8 | 21.3 | 3.4 | 2   | 0.1035 | 3.7 |
| 4/23/2018 1:39 | 4.3 | 21.1 | 3.4 | 1.9 | 0.1076 | 3.5 |
| 4/23/2018 1:40 | 5.3 | 21.1 | 3.5 | 1.9 | 0.1091 | 3.5 |
| 4/23/2018 1:41 | 4.4 | 21   | 3.5 | 1.9 | 0.1082 | 3.3 |
| 4/23/2018 1:42 | 5.2 | 20.8 | 3.3 | 1.9 | 0.1165 | 2.8 |
| 4/23/2018 1:43 | 5.9 | 21.1 | 3.4 | 1.9 | 0.0964 | 3   |
| 4/23/2018 1:44 | 4.4 | 21.1 | 3.3 | 1.9 | 0.1119 | 3.1 |
| 4/23/2018 1:45 | 4.7 | 20.9 | 3.4 | 1.9 | 0.0975 | 3.3 |
| 4/23/2018 1:46 | 4.2 | 21.1 | 3.3 | 1.9 | 0.1136 | 3.4 |
| 4/23/2018 1:47 | 3.6 | 21.2 | 3.4 | 1.9 | 0.1044 | 3.5 |
| 4/23/2018 1:48 | 3.8 | 21   | 3.3 | 1.9 | 0.102  | 3.4 |
| 4/23/2018 1:49 | 4.6 | 20.8 | 3.3 | 2   | 0.1159 | 3.5 |
| 4/23/2018 1:50 | 5.2 | 20.9 | 3.4 | 1.9 | 0.1005 | 2.7 |
| 4/23/2018 1:51 | 4.5 | 21   | 3.4 | 1.9 | 0.118  | 2.5 |
| 4/23/2018 1:52 | 4.3 | 21.3 | 3.5 | 1.9 | 0.102  | 2.6 |
| 4/23/2018 1:53 | 2.9 | 21   | 3.3 | 1.9 | 0.1125 | 1.7 |
| 4/23/2018 1:54 | 4.3 | 20.8 | 3.3 | 1.9 | 0.1027 | 1.5 |
| 4/23/2018 1:55 | 4.1 | 21.2 | 3.3 | 1.9 | 0.1131 | 1.5 |
| 4/23/2018 1:56 | 3.9 | 20.8 | 3.4 | 1.9 | 0.1053 | 1.5 |

|                |     |      |     |     |        |     |
|----------------|-----|------|-----|-----|--------|-----|
| 4/23/2018 1:57 | 4.5 | 20.9 | 3.3 | 1.9 | 0.1058 | 1.5 |
| 4/23/2018 1:58 | 3.1 | 21   | 3.4 | 1.9 | 0.1154 | 1.5 |
| 4/23/2018 1:59 | 4   | 21.1 | 3.4 | 1.9 | 0.0983 | 1.5 |
| 4/23/2018 2:00 | 2.8 | 20.9 | 3.4 | 1.9 | 0.1176 | 1.5 |
| 4/23/2018 2:01 | 4   | 21.1 | 3.4 | 1.9 | 0.0998 | 1.6 |
| 4/23/2018 2:02 | 3.8 | 21   | 3.3 | 1.9 | 0.1172 | 1.6 |
| 4/23/2018 2:03 | 4.3 | 21.3 | 3.4 | 1.9 | 0.1071 | 1.7 |
| 4/23/2018 2:04 | 3.2 | 20.9 | 3.4 | 1.9 | 0.1133 | 1.7 |
| 4/23/2018 2:05 | 3.6 | 20.7 | 3.4 | 1.9 | 0.1148 | 1.7 |
| 4/23/2018 2:06 | 2.9 | 20.6 | 3.4 | 1.9 | 0.1008 | 1.7 |
| 4/23/2018 2:07 | 3.4 | 21.2 | 3.4 | 1.9 | 0.1168 | 1.8 |
| 4/23/2018 2:08 | 3   | 20.8 | 3.5 | 1.9 | 0.094  | 1.9 |
| 4/23/2018 2:09 | 4.5 | 21.1 | 3.6 | 1.9 | 0.1181 | 1.9 |
| 4/23/2018 2:10 | 4.3 | 20.7 | 3.5 | 1.9 | 0.0997 | 2   |
| 4/23/2018 2:11 | 2.8 | 20.8 | 3.5 | 1.9 | 0.1214 | 2.1 |
| 4/23/2018 2:12 | 3.8 | 20.9 | 3.6 | 1.9 | 0.1107 | 2.1 |
| 4/23/2018 2:13 | 3.9 | 20.9 | 3.6 | 1.9 | 0.1091 | 2.2 |
| 4/23/2018 2:14 | 4.1 | 20.9 | 3.6 | 1.9 | 0.1112 | 2.3 |
| 4/23/2018 2:15 | 5.5 | 20.9 | 3.5 | 1.9 | 0.0969 | 2.3 |
| 4/23/2018 2:16 | 4.5 | 21   | 3.9 | 1.9 | 0.1148 | 2.2 |
| 4/23/2018 2:17 | 4.3 | 20.7 | 3.7 | 2   | 0.1008 | 2.3 |
| 4/23/2018 2:18 | 4.1 | 20.7 | 3.8 | 2   | 0.1175 | 2.3 |
| 4/23/2018 2:19 | 4.3 | 20.8 | 3.6 | 2   | 0.1027 | 2.5 |
| 4/23/2018 2:20 | 5.2 | 20.5 | 3.8 | 2   | 0.1122 | 2.6 |
| 4/23/2018 2:21 | 3.5 | 20.5 | 4   | 2   | 0.1082 | 2.8 |
| 4/23/2018 2:22 | 3.8 | 20.8 | 3.6 | 2   | 0.1084 | 2.9 |
| 4/23/2018 2:23 | 3.6 | 20.5 | 3.7 | 2   | 0.1203 | 2.7 |
| 4/23/2018 2:24 | 4.5 | 20.5 | 4.1 | 2   | 0.1087 | 2.7 |
| 4/23/2018 2:25 | 4.3 | 20.6 | 4.4 | 2   | 0.1169 | 2.7 |
| 4/23/2018 2:26 | 3.3 | 20.6 | 4.1 | 2   | 0.1024 | 2.9 |
| 4/23/2018 2:27 | 4.4 | 20.4 | 4.1 | 2   | 0.1164 | 2.9 |
| 4/23/2018 2:28 | 2.9 | 20.7 | 4   | 2   | 0.1109 | 2.9 |
| 4/23/2018 2:29 | 2.9 | 20.3 | 4.2 | 2   | 0.1115 | 2.9 |
| 4/23/2018 2:30 | 3.3 | 20.3 | 4.4 | 2   | 0.1158 | 2.8 |
| 4/23/2018 2:31 | 2.4 | 20.5 | 4.3 | 2   | 0.1046 | 2.8 |
| 4/23/2018 2:32 | 3.5 | 20.1 | 4.4 | 2   | 0.1113 | 2.7 |
| 4/23/2018 2:33 | 4.4 | 20.6 | 4.9 | 2   | 0.1028 | 2.7 |
| 4/23/2018 2:34 | 4.3 | 20.5 | 5.5 | 1.9 | 0.1137 | 2.5 |
| 4/23/2018 2:35 | 3.4 | 20.5 | 4.6 | 1.9 | 0.1071 | 2.6 |
| 4/23/2018 2:36 | 3.8 | 20.4 | 4.4 | 1.9 | 0.1146 | 2.6 |
| 4/23/2018 2:37 | 3.4 | 20.4 | 5.2 | 1.9 | 0.1055 | 2.6 |
| 4/23/2018 2:38 | 3.7 | 20.6 | 4.6 | 1.9 | 0.1076 | 2.7 |
| 4/23/2018 2:39 | 3.3 | 20.1 | 4.3 | 2   | 0.1194 | 2.8 |
| 4/23/2018 2:40 | 4.9 | 20.4 | 4.3 | 2   | 0.0991 | 2.8 |
| 4/23/2018 2:41 | 3.1 | 20.2 | 4.6 | 2   | 0.1206 | 2.8 |
| 4/23/2018 2:42 | 3.1 | 20.4 | 4.8 | 2   | 0.1105 | 2.9 |
| 4/23/2018 2:43 |     | 20.4 | 4.8 | 2   | 0.1144 | 2.9 |

|                |     |      |     |     |        |     |
|----------------|-----|------|-----|-----|--------|-----|
| 4/23/2018 2:44 | 6.7 | 20.4 | 4.8 | 2   | 0.1181 | 2.8 |
| 4/23/2018 2:45 | 3.8 | 20.2 | 4.7 | 2.1 | 0.1116 | 3   |
| 4/23/2018 2:46 | 3.5 | 20.3 | 4.7 | 2.1 | 0.1226 | 3   |
| 4/23/2018 2:47 | 3.3 | 20.3 | 4.8 | 2   | 0.1084 | 2.8 |
| 4/23/2018 2:48 | 4.7 | 20.2 | 5.1 | 2   | 0.1204 | 2.6 |
| 4/23/2018 2:49 |     | 20.4 | 5.4 | 2   | 0.1148 | 2.5 |
| 4/23/2018 2:50 |     | 20.4 | 5.7 | 2   | 0.1143 | 2.5 |
| 4/23/2018 2:51 | 5   | 20.5 | 5   | 2   | 0.1288 | 2.5 |
| 4/23/2018 2:52 | 2.9 | 20.3 | 5.4 | 2   | 0.1115 | 2.3 |
| 4/23/2018 2:53 | 2.9 | 20.2 | 5   | 2   | 0.1241 | 2   |
| 4/23/2018 2:54 |     | 20   | 5.2 | 2   | 0.1131 | 2   |
| 4/23/2018 2:55 |     | 20.1 | 5.2 | 2   | 0.1218 | 2   |
| 4/23/2018 2:56 | 4.6 | 20.2 | 5.2 | 2   | 0.1152 | 2   |
| 4/23/2018 2:57 | 2.3 | 20.2 | 5.2 | 2   | 0.1123 | 2   |
| 4/23/2018 2:58 | 4.6 | 19.7 | 4.9 | 2   | 0.1182 | 2   |
| 4/23/2018 2:59 | 3.6 | 20.4 | 5.4 | 2.1 | 0.1113 | 2.1 |
| 4/23/2018 3:00 | 4.1 | 20.3 | 5.5 | 2.1 | 0.1237 | 2.2 |
| 4/23/2018 3:01 | 4.7 | 20.1 | 5.8 | 2.1 | 0.1138 | 2.1 |
| 4/23/2018 3:02 | 2.4 | 20   | 5.6 | 2.1 | 0.1204 | 2.1 |
| 4/23/2018 3:03 | 3.5 | 19.8 | 5.2 | 2.1 | 0.1187 | 2.1 |
| 4/23/2018 3:04 | 4.7 | 20.1 | 5.6 | 2.1 | 0.1149 | 2.1 |
| 4/23/2018 3:05 | 4.3 | 20.3 | 5.8 | 2.1 | 0.1202 | 2.1 |
| 4/23/2018 3:06 | 4.8 | 20   | 5.8 | 2.1 | 0.1179 | 2.1 |
| 4/23/2018 3:07 | 4.8 | 20.1 | 5.8 | 2.1 | 0.1296 | 2   |
| 4/23/2018 3:08 | 3.8 | 20.3 | 5.8 | 2.1 | 0.1212 | 1.7 |
| 4/23/2018 3:09 | 4.4 | 20.1 | 6   | 2.1 | 0.1176 | 1.6 |
| 4/23/2018 3:10 | 2.9 | 19.9 | 5.5 | 2.1 | 0.1242 | 1.8 |
| 4/23/2018 3:11 | 3.5 | 20   | 5.9 | 2.1 | 0.1077 | 1.9 |
| 4/23/2018 3:12 | 4.5 | 20.3 | 5.8 | 2.1 | 0.131  | 2.1 |
| 4/23/2018 3:13 | 2.4 | 19.9 | 5.4 | 2.1 | 0.1056 | 2.2 |
| 4/23/2018 3:14 | 4.3 | 20.2 | 5.5 | 2.1 | 0.1301 | 2.3 |
| 4/23/2018 3:15 | 3.3 | 20   | 5.9 | 2.1 | 0.1257 | 2.1 |
| 4/23/2018 3:16 | 3.2 | 20   | 5.8 | 2.2 | 0.1213 | 2.1 |
| 4/23/2018 3:17 | 3.2 | 20.2 | 5.7 | 2.2 | 0.124  | 2.2 |
| 4/23/2018 3:18 | 3.5 | 20.2 | 5.6 | 2.2 | 0.1222 | 2.1 |
| 4/23/2018 3:19 | 3.9 | 20.1 | 5.6 | 2.2 | 0.1253 | 1.6 |
| 4/23/2018 3:20 | 3.9 | 20.1 | 5.8 | 2.2 | 0.115  | 1.6 |
| 4/23/2018 3:21 | 3.4 | 19.9 | 6.1 | 2.2 | 0.1256 | 1.6 |
| 4/23/2018 3:22 | 3.3 | 19.6 | 6.2 | 2.2 | 0.1198 | 1.6 |
| 4/23/2018 3:23 | 3.6 | 20   | 5.9 | 2.2 | 0.1266 | 1.5 |
| 4/23/2018 3:24 | 4.2 | 20   | 6   | 2.2 | 0.1307 | 1.5 |
| 4/23/2018 3:25 | 4   | 20.1 | 6.1 | 2.2 | 0.1224 | 1.6 |
| 4/23/2018 3:26 | 3.1 | 19.8 | 5.8 | 2.2 | 0.1326 | 1.5 |
| 4/23/2018 3:27 | 3.2 | 20.1 | 5.8 | 2.1 | 0.1112 | 1.6 |
| 4/23/2018 3:28 | 3.6 | 20.1 | 5.9 | 2.2 | 0.1345 | 1.6 |
| 4/23/2018 3:29 | 3.4 | 19.8 | 5.8 | 2.2 | 0.1146 | 1.5 |
| 4/23/2018 3:30 | 3.2 | 19.6 | 5.7 | 2.2 | 0.1249 | 1.5 |

|                |     |      |     |     |        |     |
|----------------|-----|------|-----|-----|--------|-----|
| 4/23/2018 3:31 | 3.1 | 20   | 5.9 | 2.2 | 0.1292 | 1.5 |
| 4/23/2018 3:32 | 4.3 | 20.2 | 6   | 2.2 | 0.1291 | 1.6 |
| 4/23/2018 3:33 | 4.1 | 20.4 | 6.3 | 2.2 | 0.1341 | 1.6 |
| 4/23/2018 3:34 | 3.8 | 20   | 6   | 2.2 | 0.1233 | 1.7 |
| 4/23/2018 3:35 | 3.6 | 20.1 | 5.9 | 2.2 | 0.1352 | 1.7 |
| 4/23/2018 3:36 | 3.3 | 20.1 | 5.9 | 2.2 | 0.1178 | 1.7 |
| 4/23/2018 3:37 | 2.5 | 19.9 | 6   | 2.2 | 0.1318 | 1.8 |
| 4/23/2018 3:38 | 3.4 | 20   | 6   | 2.2 | 0.1247 | 1.8 |
| 4/23/2018 3:39 | 5   | 20.1 | 5.9 | 2.2 | 0.1237 | 1.8 |
| 4/23/2018 3:40 | 3.5 | 19.7 | 6   | 2.2 | 0.1263 | 1.6 |
| 4/23/2018 3:41 | 5.6 | 20.4 | 6.1 | 2.2 | 0.1241 | 1.6 |
| 4/23/2018 3:42 | 3.9 | 20.1 | 6.4 | 2.2 | 0.1312 | 1.5 |
| 4/23/2018 3:43 | 3.4 | 19.8 | 6.3 | 2.2 | 0.1183 | 1.5 |
| 4/23/2018 3:44 | 3   | 20.1 | 5.9 | 2.2 | 0.1396 | 1.6 |
| 4/23/2018 3:45 | 4.7 | 19.7 | 5.9 | 2.2 | 0.1178 | 1.6 |
| 4/23/2018 3:46 | 4.2 | 20.1 | 6   | 2.2 | 0.1284 | 1.6 |
| 4/23/2018 3:47 | 4.5 | 19.8 | 6   | 2.2 | 0.1171 | 1.6 |
| 4/23/2018 3:48 | 4.8 | 19.9 | 5.9 | 2.2 | 0.1296 | 1.6 |
| 4/23/2018 3:49 | 3.7 | 20.1 | 6.3 | 2.2 | 0.128  | 1.6 |
| 4/23/2018 3:50 | 3.3 | 20.4 | 6.2 | 2.2 | 0.1316 | 1.6 |
| 4/23/2018 3:51 | 3.5 | 20   | 6   | 2.2 | 0.1306 | 1.6 |
| 4/23/2018 3:52 | 3.5 | 19.8 | 5.9 | 2.2 | 0.124  | 1.6 |
| 4/23/2018 3:53 | 4.2 | 20.1 | 6   | 2.2 | 0.1323 | 1.6 |
| 4/23/2018 3:54 | 2.8 | 20.2 | 6.2 | 2.2 | 0.1211 | 1.6 |
| 4/23/2018 3:55 | 4   | 19.9 | 6.3 | 2.2 | 0.1314 | 1.5 |
| 4/23/2018 3:56 | 3.4 | 20.1 | 6   | 2.2 | 0.1201 | 1.6 |
| 4/23/2018 3:57 | 3.9 | 20.2 | 6.2 | 2.2 | 0.1286 | 1.6 |
| 4/23/2018 3:58 | 2.4 | 19.8 | 6.2 | 2.2 | 0.1285 | 1.6 |
| 4/23/2018 3:59 | 3.7 | 20.1 | 6.2 | 2.2 | 0.1239 | 1.6 |
| 4/23/2018 4:00 | 4.5 | 20.2 | 5.9 | 2.2 | 0.1307 | 1.6 |
| 4/23/2018 4:01 | 2.6 | 20.1 | 6   | 2.2 | 0.1208 | 1.6 |
| 4/23/2018 4:02 | 2.9 | 20   | 6   | 2.2 | 0.1319 | 1.7 |
| 4/23/2018 4:03 | 3.9 | 19.8 | 5.9 | 2.2 | 0.1161 | 1.7 |
| 4/23/2018 4:04 | 4.7 | 20.1 | 6.2 | 2.2 | 0.1311 | 1.7 |
| 4/23/2018 4:05 | 2.7 | 19.9 | 6.2 | 2.2 | 0.1224 | 1.8 |
| 4/23/2018 4:06 | 3.2 | 20.1 | 6.1 | 2.2 | 0.1267 | 1.7 |
| 4/23/2018 4:07 | 3.7 | 19.9 | 6.1 | 2.2 | 0.1287 | 1.8 |
| 4/23/2018 4:08 | 1.8 | 19.8 | 6.2 | 2.3 | 0.1254 | 1.8 |
| 4/23/2018 4:09 | 3.5 | 19.9 | 6.3 | 2.2 | 0.1349 | 1.7 |
| 4/23/2018 4:10 | 3   | 19.9 | 6.5 | 2.2 | 0.1118 | 1.7 |
| 4/23/2018 4:11 | 3.5 | 19.8 | 6.5 | 2.2 | 0.1376 | 1.7 |
| 4/23/2018 4:12 | 3.1 | 20.1 | 6.7 | 2.2 | 0.1222 | 1.8 |
| 4/23/2018 4:13 | 5   | 19.9 | 6.6 | 2.2 | 0.1363 | 1.9 |
| 4/23/2018 4:14 | 3.4 | 19.7 | 6.2 | 2.2 | 0.1211 | 1.9 |
| 4/23/2018 4:15 | 2.1 | 19.7 | 6.5 | 2.2 | 0.131  | 1.9 |
| 4/23/2018 4:16 | 2.7 | 19.9 | 6.5 | 2.2 | 0.1262 | 1.9 |
| 4/23/2018 4:17 | 4.5 | 20   | 6.5 | 2.2 | 0.1176 | 1.9 |

|                |     |      |     |     |        |     |
|----------------|-----|------|-----|-----|--------|-----|
| 4/23/2018 4:18 | 3.1 | 20   | 6.3 | 2.2 | 0.1257 | 2   |
| 4/23/2018 4:19 | 2.1 | 19.8 | 6.1 | 2.2 | 0.1222 | 2   |
| 4/23/2018 4:20 | 2.8 | 20   | 6.4 | 2.3 | 0.1384 | 2   |
| 4/23/2018 4:21 | 2.8 | 19.9 | 6.5 | 2.3 | 0.1298 | 2   |
| 4/23/2018 4:22 | 4.7 | 19.9 | 6.8 | 2.3 | 0.1347 | 2.1 |
| 4/23/2018 4:23 | 5.2 | 19.8 | 6.4 | 2.3 | 0.1257 | 2.1 |
| 4/23/2018 4:24 | 3.4 | 19.8 | 6.4 | 2.3 | 0.1239 | 2.2 |
| 4/23/2018 4:25 | 5.1 | 19.8 | 6.6 | 2.2 | 0.1326 | 2.2 |
| 4/23/2018 4:26 | 3.7 | 19.9 | 6.7 | 2.3 | 0.12   | 2.1 |
| 4/23/2018 4:27 | 2.9 | 19.9 | 6.7 | 2.2 | 0.1384 | 2.1 |
| 4/23/2018 4:28 | 4.3 | 19.9 | 6.5 | 2.2 | 0.1256 | 2.2 |
| 4/23/2018 4:29 | 4.3 | 20   | 6.7 | 2.2 | 0.1332 | 2.3 |
| 4/23/2018 4:30 | 3.3 | 19.6 | 6.6 | 2.3 | 0.1261 | 2.3 |
| 4/23/2018 4:31 | 3.3 | 20.1 | 6.8 | 2.3 | 0.1228 | 2.3 |
| 4/23/2018 4:32 | 3.9 | 20   | 6.5 | 2.3 | 0.1391 | 2.2 |
| 4/23/2018 4:33 | 2.8 | 20   | 6.7 | 2.3 | 0.1272 | 2.1 |
| 4/23/2018 4:34 | 5   | 19.9 | 6.5 | 2.3 | 0.1402 | 2   |
| 4/23/2018 4:35 | 4.5 | 19.7 | 6.4 | 2.3 | 0.1245 | 1.9 |
| 4/23/2018 4:36 | 4.2 | 19.5 | 6.7 | 2.3 | 0.1399 | 1.7 |
| 4/23/2018 4:37 | 4.6 | 19.6 | 7.3 | 2.3 | 0.1318 | 1.8 |
| 4/23/2018 4:38 | 3.2 | 19.9 | 6.7 | 2.3 | 0.1305 | 1.7 |
| 4/23/2018 4:39 | 2.9 | 19.9 | 6.7 | 2.3 | 0.13   | 1.6 |
| 4/23/2018 4:40 | 2.1 | 19.7 | 6.5 | 2.3 | 0.124  | 1.6 |
| 4/23/2018 4:41 | 2.7 | 19.9 | 6.7 | 2.3 | 0.1327 | 1.6 |
| 4/23/2018 4:42 | 2.8 | 19.5 | 6.9 | 2.3 | 0.1233 | 1.6 |
| 4/23/2018 4:43 | 2.5 | 19.8 | 7.3 | 2.3 | 0.1333 | 1.6 |
| 4/23/2018 4:44 | 2.9 | 19.8 | 6.7 | 2.3 | 0.12   | 1.6 |
| 4/23/2018 4:45 | 3.8 | 19.8 | 6.8 | 2.3 | 0.1355 | 1.6 |
| 4/23/2018 4:46 | 2.7 | 19.8 | 6.8 | 2.3 | 0.1273 | 1.6 |
| 4/23/2018 4:47 | 3.7 | 19.8 | 6.8 | 2.3 | 0.1251 | 1.6 |
| 4/23/2018 4:48 | 2.1 | 19.9 | 6.7 | 2.3 | 0.1366 | 1.6 |
| 4/23/2018 4:49 | 4.1 | 19.6 | 6.6 | 2.3 | 0.1193 | 1.7 |
| 4/23/2018 4:50 | 4.2 | 19.6 | 6.6 | 2.3 | 0.1346 | 1.7 |
| 4/23/2018 4:51 | 3.4 | 20   | 6.8 | 2.3 | 0.1205 | 1.7 |
| 4/23/2018 4:52 | 2.9 | 19.8 | 7.3 | 2.3 | 0.1402 | 1.8 |
| 4/23/2018 4:53 | 3.8 | 19.5 | 7   | 2.3 | 0.126  | 1.8 |
| 4/23/2018 4:54 | 2.6 | 19.4 | 7   | 2.3 | 0.1307 | 1.8 |
| 4/23/2018 4:55 | 4.4 | 19.7 | 6.7 | 2.3 | 0.1334 | 1.8 |
| 4/23/2018 4:56 | 2.5 | 19.7 | 7.3 | 2.3 | 0.1272 | 1.8 |
| 4/23/2018 4:57 | 3.3 | 19.6 | 7.4 | 2.3 | 0.1379 | 1.8 |
| 4/23/2018 4:58 | 3.8 | 19.5 | 7.6 | 2.3 | 0.1231 | 1.7 |
| 4/23/2018 4:59 | 3.8 | 19.6 | 7.5 | 2.3 | 0.13   | 1.7 |
| 4/23/2018 5:00 | 4.1 | 19.5 | 7.4 | 2.3 | 0.1301 | 1.7 |
| 4/23/2018 5:01 | 3.8 | 20   | 7.3 | 2.3 | 0.1345 | 1.8 |
| 4/23/2018 5:02 | 4.4 | 19.7 | 7.4 | 2.3 | 0.1331 | 1.8 |
| 4/23/2018 5:03 | 3   | 19.7 | 7.2 | 2.3 | 0.1294 | 1.8 |
| 4/23/2018 5:04 | 5.3 | 19.7 | 7.4 | 2.3 | 0.1412 | 1.9 |

|                |     |      |     |     |        |     |
|----------------|-----|------|-----|-----|--------|-----|
| 4/23/2018 5:05 | 2.4 | 19.4 | 7.1 | 2.3 | 0.1279 | 1.9 |
| 4/23/2018 5:06 | 3   | 19.7 | 6.8 | 2.3 | 0.1388 | 1.9 |
| 4/23/2018 5:07 | 3.4 | 19.7 | 7.2 | 2.4 | 0.1263 | 1.9 |
| 4/23/2018 5:08 | 2.8 | 19.5 | 7.2 | 2.4 | 0.1343 | 1.8 |
| 4/23/2018 5:09 | 4.1 | 19.8 | 7.2 | 2.4 | 0.1325 | 1.8 |
| 4/23/2018 5:10 | 2.8 | 19.9 | 7.2 | 2.4 | 0.1263 | 1.8 |
| 4/23/2018 5:11 | 4.2 | 19.9 | 7.3 | 2.4 | 0.1337 | 1.8 |
| 4/23/2018 5:12 | 2.9 | 19.6 | 7.5 | 2.4 | 0.125  | 1.8 |
| 4/23/2018 5:13 | 3.8 | 19.4 | 7.4 | 2.4 | 0.1386 | 1.9 |
| 4/23/2018 5:14 | 3.8 | 19.5 | 7.3 | 2.4 | 0.1315 | 2.1 |
| 4/23/2018 5:15 | 2.8 | 19.4 | 7.6 | 2.4 | 0.1406 | 2.1 |
| 4/23/2018 5:16 | 3.4 | 19.5 | 7.7 | 2.5 | 0.1315 | 2.1 |
| 4/23/2018 5:17 | 2.4 | 19.3 | 8.2 | 2.5 | 0.1389 | 2.2 |
| 4/23/2018 5:18 | 2.7 | 19.3 | 8   | 2.5 | 0.1317 | 2.3 |
| 4/23/2018 5:19 | 3.3 | 19.4 | 7.6 | 2.5 | 0.1295 | 2.3 |
| 4/23/2018 5:20 | 3.9 | 19   | 7.7 | 2.5 | 0.1374 | 2.4 |
| 4/23/2018 5:21 | 2.8 | 19.3 | 7.6 | 2.6 | 0.1322 | 2.3 |
| 4/23/2018 5:22 | 4.3 | 19.3 | 7.8 | 2.6 | 0.1477 | 2.3 |
| 4/23/2018 5:23 | 4.3 | 19.3 | 8.7 | 2.6 | 0.129  | 2.4 |
| 4/23/2018 5:24 | 2.9 | 19.3 | 8.8 | 2.6 | 0.1397 | 2.4 |
| 4/23/2018 5:25 | 4.6 | 19.3 | 8.1 | 2.6 | 0.1339 | 2.5 |
| 4/23/2018 5:26 | 2.9 | 19.2 | 7.6 | 2.6 | 0.1289 | 2.6 |
| 4/23/2018 5:27 | 2.9 | 19.3 | 7.6 | 2.6 | 0.1519 | 2.5 |
| 4/23/2018 5:28 |     | 19.3 | 8   | 2.7 | 0.1301 | 2.6 |
| 4/23/2018 5:29 | 2.5 | 19.4 | 8.1 | 2.7 | 0.1391 | 2.5 |
| 4/23/2018 5:30 | 3.1 | 19.6 | 8.5 | 2.7 | 0.1298 | 1.9 |
| 4/23/2018 5:31 | 2.5 | 19.3 | 8.5 | 2.7 | 0.1425 | 1.8 |
| 4/23/2018 5:32 | 3.5 | 19.3 | 8.5 | 2.6 | 0.1364 | 1.8 |
| 4/23/2018 5:33 | 3.5 | 19.4 | 8.8 | 2.7 | 0.1302 | 1.9 |
| 4/23/2018 5:34 | 2   | 19.4 | 7.9 | 2.7 | 0.1381 | 2   |
| 4/23/2018 5:35 |     | 19.3 | 8   | 2.7 | 0.1297 | 2.1 |
| 4/23/2018 5:36 |     | 19.2 | 8   | 2.7 | 0.1413 | 2.2 |
| 4/23/2018 5:37 | 9.4 | 19.3 | 9.2 | 2.7 | 0.136  | 2.4 |
| 4/23/2018 5:38 | 5.6 | 19.1 | 9.8 | 2.7 | 0.1507 | 2.4 |
| 4/23/2018 5:39 |     | 19.2 | 9.2 | 2.7 | 0.1321 | 2.4 |
| 4/23/2018 5:40 | 7.8 | 19.2 | 8.6 | 2.7 | 0.144  | 2.4 |
| 4/23/2018 5:41 | 1.9 | 19.4 | 8.2 | 2.7 | 0.1368 | 2.5 |
| 4/23/2018 5:42 | 3.7 | 19.5 | 8.1 | 2.7 | 0.1266 | 2.6 |
| 4/23/2018 5:43 |     | 19.9 | 8.4 | 2.7 | 0.1461 | 2.6 |
| 4/23/2018 5:44 | 2.3 | 19.2 | 8.4 | 2.7 | 0.1337 | 2.7 |
| 4/23/2018 5:45 | 2.7 | 19.2 | 8.8 | 2.7 | 0.1359 | 2.6 |
| 4/23/2018 5:46 |     | 19.6 | 8.6 | 2.7 | 0.1263 | 2.6 |
| 4/23/2018 5:47 |     | 19.4 | 8.8 | 2.7 | 0.134  | 2.6 |
| 4/23/2018 5:48 | 4.4 | 19.4 | 8.8 | 2.8 | 0.1485 | 2.7 |
| 4/23/2018 5:49 | 3.4 | 19.2 | 8.2 | 2.8 | 0.1346 | 2.7 |
| 4/23/2018 5:50 |     | 19.3 | 8.2 | 2.8 | 0.1387 | 2.8 |
| 4/23/2018 5:51 | 1.5 | 19.6 | 8.3 | 2.8 | 0.1311 | 2.8 |

|                |     |      |      |     |        |     |
|----------------|-----|------|------|-----|--------|-----|
| 4/23/2018 5:52 |     | 19.6 | 8.6  | 2.8 | 0.146  | 2.8 |
| 4/23/2018 5:53 | 3.1 | 19.2 | 9.4  | 2.7 | 0.1416 | 2.9 |
| 4/23/2018 5:54 | 3.2 | 19.4 | 8.5  | 2.7 | 0.1444 | 3   |
| 4/23/2018 5:55 | 3.2 | 19.5 | 8.3  | 2.7 | 0.144  | 3   |
| 4/23/2018 5:56 | 3.2 | 19.6 | 8.2  | 2.7 | 0.1321 | 3.1 |
| 4/23/2018 5:57 | 3.4 | 19.5 | 8.3  | 2.7 | 0.1448 | 3.1 |
| 4/23/2018 5:58 | 3.7 | 19.4 | 8.4  | 2.7 | 0.1337 | 3.1 |
| 4/23/2018 5:59 | 3.6 | 19.4 | 8.7  | 2.7 | 0.1486 | 3.1 |
| 4/23/2018 6:00 | 2.7 | 19.5 | 8.5  | 2.7 | 0.1382 | 3.1 |
| 4/23/2018 6:01 | 3.8 | 19.5 | 8.6  | 2.7 | 0.1342 | 3.1 |
| 4/23/2018 6:02 | 4.1 | 19.6 | 8.7  | 2.7 | 0.1485 | 2.7 |
| 4/23/2018 6:03 | 1.9 | 19.5 | 9    | 2.7 | 0.1368 | 2.4 |
| 4/23/2018 6:04 | 3.1 | 19.3 | 8.7  | 2.7 | 0.1521 | 2.6 |
| 4/23/2018 6:05 | 4.1 | 19.4 | 8.6  | 2.7 | 0.1343 | 2.8 |
| 4/23/2018 6:06 | 3.6 | 19.6 | 8.4  | 2.7 | 0.1459 | 2.9 |
| 4/23/2018 6:07 | 3.7 | 19.5 | 8.4  | 2.7 | 0.1407 | 3   |
| 4/23/2018 6:08 | 2.2 | 19.1 | 8.9  | 2.7 | 0.1364 | 3   |
| 4/23/2018 6:09 | 3.9 | 19.2 | 8.9  | 2.7 | 0.1478 | 2.9 |
| 4/23/2018 6:10 | 2.8 | 19.5 | 9    | 2.7 | 0.1363 | 2.9 |
| 4/23/2018 6:11 | 3.2 | 19.2 | 8.7  | 2.7 | 0.1467 | 2.9 |
| 4/23/2018 6:12 | 3.2 | 19.2 | 8.3  | 2.8 | 0.1305 | 3   |
| 4/23/2018 6:13 | 3.4 | 19.3 | 8.4  | 2.8 | 0.1437 | 3   |
| 4/23/2018 6:14 | 3.7 | 19.4 | 9    | 2.8 | 0.1477 | 3.1 |
| 4/23/2018 6:15 | 3.3 | 18.9 | 9    | 2.9 | 0.1434 | 3.1 |
| 4/23/2018 6:16 | 1.6 | 19.1 | 9.3  | 2.9 | 0.1513 | 3   |
| 4/23/2018 6:17 | 3.8 | 19.3 | 9.5  | 2.9 | 0.1413 | 3   |
| 4/23/2018 6:18 | 3.8 | 19.4 | 9.3  | 3   | 0.1433 | 3   |
| 4/23/2018 6:19 | 2.9 | 19.1 | 9.3  | 3   | 0.1316 | 2.8 |
| 4/23/2018 6:20 | 3.1 | 19.3 | 9.2  | 3   | 0.1468 | 2.9 |
| 4/23/2018 6:21 | 3   | 19.1 | 9.2  | 3.1 | 0.1478 | 3   |
| 4/23/2018 6:22 | 3   | 18.7 | 9.1  | 3.1 | 0.1359 | 3.1 |
| 4/23/2018 6:23 | 3.3 | 19.2 | 10.1 | 3.2 | 0.1567 | 3   |
| 4/23/2018 6:24 | 2.2 | 19.1 | 9.7  | 3.3 | 0.1376 | 3.1 |
| 4/23/2018 6:25 | 2.3 | 19.3 | 9    | 3.3 | 0.1503 | 3   |
| 4/23/2018 6:26 | 3.2 | 19   | 9.7  | 3.3 | 0.1461 | 3   |
| 4/23/2018 6:27 | 3.4 | 19.1 | 9.7  | 3.4 | 0.1517 | 2.9 |
| 4/23/2018 6:28 | 3.6 | 19.3 | 9.3  | 3.4 | 0.1498 | 3   |
| 4/23/2018 6:29 | 3.9 | 19.2 | 9.5  | 3.4 | 0.137  | 3.1 |
| 4/23/2018 6:30 | 3.3 | 19.4 | 9.8  | 3.5 | 0.1514 | 3   |
| 4/23/2018 6:31 | 3.6 | 19.1 | 9.8  | 3.5 | 0.1459 | 3   |
| 4/23/2018 6:32 | 3.9 | 19.3 | 9.6  | 3.5 | 0.1548 | 3   |
| 4/23/2018 6:33 | 3.1 | 19.1 | 9.4  | 3.5 | 0.1482 | 3   |
| 4/23/2018 6:34 | 3.4 | 19.5 | 10   | 3.6 | 0.1434 | 3.1 |
| 4/23/2018 6:35 | 2.6 | 19   | 9.9  | 3.6 | 0.1559 | 2.7 |
| 4/23/2018 6:36 | 2.1 | 19.3 | 9.6  | 3.6 | 0.1431 | 2.5 |
| 4/23/2018 6:37 | 3.5 | 19.2 | 9.2  | 3.6 | 0.16   | 2.4 |
| 4/23/2018 6:38 | 2.3 | 19.1 | 9.4  | 3.6 | 0.1414 | 2.5 |

|                |     |      |     |     |        |     |
|----------------|-----|------|-----|-----|--------|-----|
| 4/23/2018 6:39 | 3.1 | 18.9 | 9.7 | 3.6 | 0.1483 | 2.5 |
| 4/23/2018 6:40 | 1.3 | 19.1 | 9.7 | 3.5 | 0.1516 | 2.6 |
| 4/23/2018 6:41 | 2.5 | 19.2 | 9.5 | 3.5 | 0.1477 | 2.6 |
| 4/23/2018 6:42 | 2.9 | 19.3 | 9.5 | 3.5 | 0.1496 | 2.6 |
| 4/23/2018 6:43 | 2.4 | 19.1 | 9.7 | 3.5 | 0.1424 | 2.7 |
| 4/23/2018 6:44 | 3.8 | 19.2 | 9.6 | 3.5 | 0.1494 | 2.7 |
| 4/23/2018 6:45 | 3.8 | 19.1 | 9.5 | 3.5 | 0.1472 | 2.8 |
| 4/23/2018 6:46 | 3   | 19.2 | 9.9 | 3.5 | 0.1471 | 2.8 |
| 4/23/2018 6:47 | 3.2 | 19.2 | 9.6 | 3.5 | 0.1508 | 2.8 |
| 4/23/2018 6:48 | 3.3 | 19.4 | 9.7 | 3.5 | 0.142  | 2.8 |
| 4/23/2018 6:49 | 4.6 | 19.3 | 9.4 | 3.5 | 0.1516 | 2.7 |
| 4/23/2018 6:50 | 2   | 19.4 | 9.5 | 3.5 | 0.1455 | 2.5 |
| 4/23/2018 6:51 | 3.7 | 19.4 | 9.4 | 3.4 | 0.1403 | 2.3 |
| 4/23/2018 6:52 | 4.7 | 19.2 | 9.2 | 3.4 | 0.1415 | 2.3 |
| 4/23/2018 6:53 | 3.7 | 19.1 | 9.2 | 3.4 | 0.1514 | 2.3 |
| 4/23/2018 6:54 | 4   | 19.1 | 9.2 | 3.5 | 0.1522 | 2.4 |
| 4/23/2018 6:55 | 3.4 | 19   | 9.2 | 3.5 | 0.1346 | 2.5 |
| 4/23/2018 6:56 | 3.2 | 19.1 | 9.3 | 3.5 | 0.1564 | 2.5 |
| 4/23/2018 6:57 | 3   | 19.3 | 9.3 | 3.5 | 0.141  | 2.5 |
| 4/23/2018 6:58 | 2.9 | 19.3 | 9.4 | 3.5 | 0.1558 | 2.5 |
| 4/23/2018 6:59 | 2.9 | 19.1 | 9.5 | 3.4 | 0.1525 | 2.5 |
| 4/23/2018 7:00 | 3   | 19.1 | 9.3 | 3.4 | 0.1414 | 2.5 |
| 4/23/2018 7:01 | 3.4 | 19.3 | 9.3 | 3.4 | 0.1588 | 2.5 |
| 4/23/2018 7:02 | 3.7 | 19.2 | 9.1 | 3.4 | 0.1464 | 2.6 |
| 4/23/2018 7:03 | 2.1 | 19.4 | 9   | 3.4 | 0.1576 | 2.8 |
| 4/23/2018 7:04 | 4.3 | 19.6 | 9.1 | 3.5 | 0.1501 | 2.7 |
| 4/23/2018 7:05 | 3.4 | 19.3 | 9.3 | 3.5 | 0.1465 | 2.7 |
| 4/23/2018 7:06 | 3.6 | 19.2 | 9.1 | 3.5 | 0.1482 | 2.7 |
| 4/23/2018 7:07 | 1.5 | 19.2 | 8.9 | 3.5 | 0.142  | 2.7 |
| 4/23/2018 7:08 | 2.7 | 19.4 | 8.8 | 3.5 | 0.1558 | 2.7 |
| 4/23/2018 7:09 | 2.4 | 19.3 | 9   | 3.5 | 0.1398 | 2.7 |
| 4/23/2018 7:10 | 4.7 | 19.5 | 9   | 3.5 | 0.1509 | 2.5 |
| 4/23/2018 7:11 | 2.8 | 19.1 | 9   | 3.5 | 0.1495 | 2.5 |
| 4/23/2018 7:12 | 3.4 | 19.2 | 8.9 | 3.5 | 0.1449 | 2.5 |
| 4/23/2018 7:13 | 4.5 | 19.2 | 9   | 3.5 | 0.1525 | 2.5 |
| 4/23/2018 7:14 | 3.5 | 19   | 9   | 3.5 | 0.1502 | 2.5 |
| 4/23/2018 7:15 | 3.2 | 19.6 | 9   | 3.5 | 0.1568 | 2.4 |
| 4/23/2018 7:16 | 2.4 | 19.1 | 8.9 | 3.5 | 0.143  | 2.5 |
| 4/23/2018 7:17 | 2.9 | 19.3 | 8.9 | 3.6 | 0.1587 | 2.5 |
| 4/23/2018 7:18 | 3.1 | 19.2 | 8.9 | 3.6 | 0.1509 | 2.6 |
| 4/23/2018 7:19 | 3.9 | 19.5 | 8.9 | 3.6 | 0.1517 | 2.6 |
| 4/23/2018 7:20 | 3.5 | 19.2 | 9   | 3.6 | 0.1455 | 2.5 |
| 4/23/2018 7:21 | 4.5 | 19.1 | 9   | 3.6 | 0.1455 | 2.6 |
| 4/23/2018 7:22 | 3.4 | 19.2 | 9.2 | 3.6 | 0.1581 | 2.6 |
| 4/23/2018 7:23 | 3.3 | 20.5 | 9.1 | 3.6 | 0.1555 | 2.5 |
| 4/23/2018 7:24 | 2.4 | 20.2 | 8.9 | 3.6 | 0.1539 | 2.4 |
| 4/23/2018 7:25 | 2.5 | 16   | 8.9 | 3.6 | 0.1676 | 1.9 |



|                |     |      |     |      |      |     |         |      |
|----------------|-----|------|-----|------|------|-----|---------|------|
| 4/23/2018 7:26 |     |      | 1.9 | 18.3 | 8.9  | 3.6 | 0.1873  | 0.3  |
| 4/23/2018 7:27 |     |      | 3   | 18.9 | 8.8  | 3.6 | 0.2004  | 0    |
| 4/23/2018 7:28 |     |      | 2.7 | 19.4 | 8.9  | 3.6 | 0.192   | 1.4  |
| 4/23/2018 7:29 |     |      | 2.3 | 19.4 | 8.9  | 3.6 | 0.202   | 21   |
| 4/23/2018 7:30 | 0.2 | -0.1 | 2.1 | 19.4 | 9    | 3.6 | 0.207   | 29.3 |
| 4/23/2018 7:31 | 0.2 | -0.6 | 2.7 | 19.2 | 8.9  | 3.7 | 0.1995  | 29.7 |
| 4/23/2018 7:32 | 0.2 | -0.4 | 2   | 19.5 | 9.1  | 3.7 | 0.2064  | 29.8 |
| 4/23/2018 7:33 | 0.3 | 0.5  | 3.5 | 19.2 | 9.2  | 3.6 | 0.1998  | 29.6 |
| 4/23/2018 7:34 | 0.3 | 0.2  | 1.6 | 19.3 | 9.1  | 3.6 | 0.209   | 23.3 |
| 4/23/2018 7:35 | 0.3 | 0.4  | 3.6 | 19.2 | 9    | 3.6 | 0.2147  | 2.4  |
| 4/23/2018 7:36 | 0.3 | -0.4 | 3.7 | 19.3 | 9    | 3.6 | 0.2134  | 0.2  |
| 4/23/2018 7:37 | 0.2 | -0.2 | 2.8 | 19.2 | 9.2  | 3.6 | 0.2201  | 0.1  |
| 4/23/2018 7:38 | 0.3 | 0.5  | 3.8 | 19.1 | 9    | 3.6 | 0.2102  | 0.1  |
| 4/23/2018 7:39 | 0.3 | -0.1 | 2.7 | 19.5 | 9.1  | 3.6 | 0.2245  | 0.5  |
| 4/23/2018 7:40 | 0.3 | 0.3  | 3   | 19.2 | 9.1  | 3.6 | 0.1963  | 1.5  |
| 4/23/2018 7:41 | 0.3 | -0.4 | 4   | 19.3 | 9    | 3.6 | 0.2105  | 1.6  |
| 4/23/2018 7:42 | 0.3 | -0.3 | 3   | 19.2 | 9    | 3.6 | 0.2165  | 1.7  |
| 4/23/2018 7:43 | 0.3 | -0.1 | 4   | 19.2 | 9    | 3.6 | 0.1672  | 1.6  |
| 4/23/2018 7:44 | 0.3 | 0.7  | 2.2 | 19.3 | 9    | 3.6 | -0.0225 | 1.7  |
| 4/23/2018 7:45 | 0.3 | 0.1  | 2.8 | 19.2 | 9    | 3.6 | -0.0439 | 1.7  |
| 4/23/2018 7:46 | 0.3 | 0.6  | 3.3 | 19.2 | 9.1  | 3.6 | -0.0345 | 1.6  |
| 4/23/2018 7:47 | 0.4 | 0    | 3   | 19.3 | 9    | 3.6 |         | 1.7  |
| 4/23/2018 7:48 | 0.4 | -0.1 | 3   | 19.3 | 9.1  | 3.7 |         | 1.7  |
| 4/23/2018 7:49 | 0.4 | 0.7  | 2.5 | 19   | 9    | 3.7 |         | 1.7  |
| 4/23/2018 7:50 | 0.4 | 1.4  | 3.5 | 19.2 | 9    | 3.7 |         | 1.7  |
| 4/23/2018 7:51 | 0.4 | 0.1  | 1.9 | 19.2 | 9.1  | 3.7 |         | 1.7  |
| 4/23/2018 7:52 | 0.4 | -0.9 | 3.6 | 19   | 9.1  | 3.7 |         | 1.7  |
| 4/23/2018 7:53 | 0.4 | -0.2 | 3   | 19.3 | 9.1  | 3.7 |         | 1.7  |
| 4/23/2018 7:54 | 0.4 | 0.2  | 4   | 19.4 | 9.2  | 3.8 |         | 1.7  |
| 4/23/2018 7:55 | 0.4 | 0.1  | 2.5 | 19.5 | 9.1  | 3.8 |         | 1.7  |
| 4/23/2018 7:56 | 0.3 | -0.3 | 3.8 | 19.1 | 9.3  | 3.8 |         | 1.6  |
| 4/23/2018 7:57 | 0.3 | 0.5  | 2.4 | 19.2 | 10.4 | 3.8 |         | 1.7  |
| 4/23/2018 7:58 | 0.4 | -0.4 | 3.5 | 19.2 | 10.6 | 3.8 |         | 1.6  |
| 4/23/2018 7:59 | 0.4 | 0.5  | 3.4 | 19.1 | 10.5 | 3.8 |         | 1.6  |
| 4/23/2018 8:00 | 0.4 | 0.8  | 3.7 | 19.2 | 10.4 | 3.8 |         | 1.6  |
| 4/23/2018 8:01 | 0.3 | 0.4  | 2.2 | 19.1 | 10.9 | 3.8 |         | 1.6  |
| 4/23/2018 8:02 | 0.3 | 0.9  | 2.6 | 19.3 | 10.9 | 3.9 |         | 1.6  |
| 4/23/2018 8:03 | 0.2 | 0.8  | 2.4 | 19.3 | 10.7 | 3.9 |         | 1.7  |
| 4/23/2018 8:04 | 0.2 | -0.5 | 3.8 | 19.4 | 9.8  | 3.9 |         | 1.6  |
| 4/23/2018 8:05 | 0.2 | -0.1 | 2.4 | 19.4 | 10.3 | 4   |         | 1.6  |
| 4/23/2018 8:06 | 0.2 | -0.1 | 2.9 | 18.9 | 10.2 | 4   |         | 1.6  |
| 4/23/2018 8:07 | 0.2 | -0.1 | 3.7 | 19   | 9.7  | 4   |         | 1.7  |
| 4/23/2018 8:08 | 0.2 | 0.4  | 2   | 19   | 10.4 | 4   |         | 1.6  |
| 4/23/2018 8:09 | 0.2 | 0.3  | 3.1 | 19.8 | 10.7 | 4.1 |         | 1.7  |
| 4/23/2018 8:10 |     |      |     |      | 10.3 | 4.1 |         | 1.6  |
| 4/23/2018 8:11 |     |      |     |      | 10   | 4.1 |         | 1.7  |
| 4/23/2018 8:12 |     |      |     |      | 10   | 4.1 |         | 1.7  |

|                |     |      |     |      |      |      |        |     |
|----------------|-----|------|-----|------|------|------|--------|-----|
| 4/23/2018 8:13 |     |      |     |      | 10.5 | 4.2  |        | 1.7 |
| 4/23/2018 8:14 |     |      |     |      | 10.5 | 4.2  |        | 1.7 |
| 4/23/2018 8:15 |     |      |     |      | 10.2 | 4.2  |        | 1.7 |
| 4/23/2018 8:16 |     |      |     |      | 10.2 | 4.2  |        | 1.7 |
| 4/23/2018 8:17 |     |      |     |      | 9.9  | 4.3  |        | 1.7 |
| 4/23/2018 8:18 |     |      |     |      | 11   | 4.3  |        | 1.7 |
| 4/23/2018 8:19 |     |      |     |      | 10.3 | 4.3  |        | 1.7 |
| 4/23/2018 8:20 |     |      |     |      | 10   | 4.3  |        | 1.7 |
| 4/23/2018 8:21 |     |      |     |      | 10.2 | 4.4  |        | 1.7 |
| 4/23/2018 8:22 |     |      |     |      | 9.8  | 4.4  |        | 1.7 |
| 4/23/2018 8:23 |     |      |     |      | 9.7  | 4.4  |        | 1.7 |
| 4/23/2018 8:24 |     |      |     |      | 9.7  | 4.4  |        | 1.7 |
| 4/23/2018 8:25 |     |      |     |      | 9.9  | 4.5  |        | 1.8 |
| 4/23/2018 8:26 |     |      |     |      | 9.8  | 4.5  |        | 1.8 |
| 4/23/2018 8:27 |     |      |     |      | 9.8  | 4.5  |        | 1.7 |
| 4/23/2018 8:28 |     |      |     |      | 9.9  | 4.5  |        | 1.7 |
| 4/23/2018 8:29 |     |      |     |      | 10.2 | 4.6  |        | 1.7 |
| 4/23/2018 8:30 |     |      |     |      | 9.9  | 4.6  |        | 1.7 |
| 4/23/2018 8:31 |     |      |     |      | 10.1 | 4.6  |        | 1.7 |
| 4/23/2018 8:32 |     |      |     |      | 10   | 4.7  |        | 1.7 |
| 4/23/2018 8:33 |     |      |     |      | 10.3 | 4.7  |        | 1.7 |
| 4/23/2018 8:34 |     |      |     |      | 9.7  | 4.7  |        | 1.7 |
| 4/23/2018 8:35 |     |      |     |      | 10   | 4.8  |        | 1.7 |
| 4/23/2018 8:36 |     |      |     |      | 9.9  | 4.8  |        | 1.7 |
| 4/23/2018 8:37 |     |      |     |      | 15.2 | 4.9  |        | 1.7 |
| 4/23/2018 8:38 |     |      |     |      | 0.6  | 4.6  |        | 1.7 |
| 4/23/2018 8:39 |     |      |     |      | 0    | 4.1  |        | 1.7 |
| 4/23/2018 8:40 | 0.3 | 0.1  | 3.1 | 25   | 0    | 3.4  |        | 1.7 |
| 4/23/2018 8:41 | 0.3 | 0.4  | 4.5 | 20.7 | 0    | 2.8  |        | 1.7 |
| 4/23/2018 8:42 | 0.2 | 0.2  | 3.3 | 19   | 0    | 2.3  |        | 1.7 |
| 4/23/2018 8:43 | 0.2 | 0    | 1.5 | 18.3 | 0    | 1.7  |        | 1.7 |
| 4/23/2018 8:44 | 0.2 | 0.2  | 3.4 | 18.1 | 0    | 1.1  |        | 1.7 |
| 4/23/2018 8:45 | 0.2 | -0.2 | 2.9 | 17.6 | 0    | 0.5  |        | 1.7 |
| 4/23/2018 8:46 | 0.2 | 0.7  | 0.6 | 17.5 | 0    | -0.1 |        | 1.7 |
| 4/23/2018 8:47 | 0.2 | -0.4 | 2.9 | 17.6 | 0    | -0.1 |        | 1.8 |
| 4/23/2018 8:48 | 0.3 | 0.1  | 3.1 | 17.3 | 0    | -0.1 |        | 1.8 |
| 4/23/2018 8:49 | 0.2 | 0.9  | 3.5 | 17.1 | 0    | 0    |        | 1.7 |
| 4/23/2018 8:50 | 0.3 | 0.3  | 2.2 | 17.4 | 13.6 | 2.2  | 0.2326 | 1.7 |
| 4/23/2018 8:51 | 0.3 | 0.5  | 1.2 | 17.3 | 10.2 | 5.6  | 0.2447 | 1.7 |
| 4/23/2018 8:52 | 0.3 | 0.9  | 3.7 | 17.1 | 10.2 | 5.4  | 0.2443 | 1.7 |
| 4/23/2018 8:53 | 0.3 | -0.4 | 4.4 | 17.2 | 10.1 | 5.4  | 0.2287 | 1.7 |
| 4/23/2018 8:54 | 0.2 | 1    |     | 17.3 | 10.2 | 5.5  | 0.2436 | 1.7 |
| 4/23/2018 8:55 | 0.2 | 0.4  |     | 17.3 | 10   | 5.5  | 0.2307 | 1.7 |
| 4/23/2018 8:56 | 0.2 | 0.6  | 9.9 | 17.2 | 10.2 | 5.5  | 0.2399 | 1.7 |
| 4/23/2018 8:57 | 0.2 | 0    | 3.2 | 17.4 | 10.4 | 5.5  | 0.2371 | 1.7 |
| 4/23/2018 8:58 | 0.2 | 0.9  |     | 19.4 | 22.1 | 37.3 | 0.3637 | 1.7 |
| 4/23/2018 8:59 | 0.2 | 0.5  | 3.2 | 23.4 | 29.8 | 74.3 | 0.734  | 1.8 |

|                |     |      |     |      |      |       |        |     |
|----------------|-----|------|-----|------|------|-------|--------|-----|
| 4/23/2018 9:00 | 0.2 | 0.2  | 4   | 27.9 | 33.6 | 91.4  | 1.1598 | 1.8 |
| 4/23/2018 9:01 | 0.2 | 0.3  |     | 30.5 | 36   | 102.5 | 1.6108 | 1.9 |
| 4/23/2018 9:02 | 0.2 | 0.4  | 4.6 | 30.7 | 35.8 | 101.5 | 1.8801 | 1.9 |
| 4/23/2018 9:03 | 0.2 | 0.6  | 3.5 | 30.5 | 35.1 | 101.5 | 2.0143 | 1.9 |
| 4/23/2018 9:04 | 0.2 | 0.4  | 3.7 | 29.3 | 34.4 | 101.2 | 2.0781 | 1.9 |
| 4/23/2018 9:05 | 0.3 | 0    | 3.1 | 29.4 | 33.7 | 100.7 | 2.0783 | 1.9 |
| 4/23/2018 9:06 | 0.3 | -0.3 |     | 28.7 | 33.1 | 100   | 2.0697 | 1.9 |
| 4/23/2018 9:07 | 0.2 | 0.5  |     | 28.3 | 32.4 | 99.1  | 2.0572 | 1.9 |
| 4/23/2018 9:08 | 0.2 | 0    |     | 27.9 | 32.3 | 98.1  | 2.0985 | 1.9 |
| 4/23/2018 9:09 | 0.3 | 0.4  | 2.5 | 28.1 | 32   | 96.9  | 2.0892 | 1.9 |
| 4/23/2018 9:10 | 0.3 | 0.4  | 3.2 | 27.3 | 31.6 | 96    | 2.0478 | 1.9 |
| 4/23/2018 9:11 | 0.3 | 0.4  | 3.3 | 27.2 | 31.1 | 94.6  | 2.0508 | 1.9 |
| 4/23/2018 9:12 | 0.2 | 0.1  | 2.9 | 26.6 | 30.9 | 93.3  | 1.9963 | 1.9 |
| 4/23/2018 9:13 | 0.1 | 0.2  | 2.4 | 26.3 | 30.9 | 92.2  | 1.9864 | 1.9 |
| 4/23/2018 9:14 | 0.1 | -0.4 | 4.9 | 26.2 | 30.3 | 91    | 1.968  | 1.9 |
| 4/23/2018 9:15 | 0.1 | 0.1  | 3.9 | 25.6 | 29.4 | 89.9  | 1.9311 | 1.9 |
| 4/23/2018 9:16 | 0.1 | 0.9  | 4.3 | 25.2 | 29   | 88.6  | 1.9187 | 1.8 |
| 4/23/2018 9:17 | 0.1 | 0.9  | 4.1 | 25.1 | 28.6 | 87.7  | 1.8794 | 1.9 |
| 4/23/2018 9:18 | 0.1 | 0.6  | 3.9 | 24.9 | 28.3 | 86.5  | 1.8798 | 1.9 |
| 4/23/2018 9:19 | 0.1 | 0.6  | 4.6 | 24.3 | 27.8 | 85.2  | 1.8226 | 1.9 |
| 4/23/2018 9:20 | 0   | 0.7  | 3.7 | 24.5 | 27.6 | 84.1  | 1.8279 | 1.9 |
| 4/23/2018 9:21 | 0   | 0.4  | 4   | 24   | 27.2 | 83.1  | 1.8083 | 1.9 |
| 4/23/2018 9:22 | 0   | 0.2  | 4.7 | 23.9 | 27   | 82    | 1.7951 | 1.9 |
| 4/23/2018 9:23 | 0   | 0    | 4.1 | 23.9 | 26.7 | 81.1  | 1.7718 | 1.9 |
| 4/23/2018 9:24 | 0   | 0.3  | 4.1 | 23.9 | 26.5 | 80.2  | 1.7569 | 1.9 |
| 4/23/2018 9:25 | 0.1 | 0.1  | 1.9 | 23.7 | 26.2 | 79.4  | 1.7423 | 1.9 |
| 4/23/2018 9:26 | 0.1 | 0.4  | 3.5 | 23.4 | 25.8 | 78.5  | 1.7116 | 1.9 |
| 4/23/2018 9:27 | 0.1 | 0.5  | 3.8 | 23.2 | 25.5 | 77.7  | 1.701  | 1.8 |
| 4/23/2018 9:28 | 0.1 | 0.4  | 3.1 | 22.9 | 25.3 | 77    | 1.6846 | 1.8 |
| 4/23/2018 9:29 | 0.2 | 0.5  | 2.8 | 22.7 | 25   | 76    | 1.6626 | 1.9 |
| 4/23/2018 9:30 | 0.2 | 0.1  | 3.6 | 22.6 | 24.7 | 75.2  | 1.6503 | 1.8 |
| 4/23/2018 9:31 | 0.2 | -0.5 | 2.7 | 22.7 | 24.5 | 74.2  | 1.6273 | 1.8 |
| 4/23/2018 9:32 | 0.2 | 0.4  | 3.8 | 22.5 | 24.2 | 73.5  | 1.6355 | 1.8 |
| 4/23/2018 9:33 | 0.1 | 0.2  | 2.8 | 22.2 | 24   | 72.6  | 1.6104 | 1.9 |
| 4/23/2018 9:34 | 0.1 | 0.6  | 3.1 | 22   | 23.8 | 71.9  | 1.592  | 1.8 |
| 4/23/2018 9:35 | 0.1 | -0.1 | 3.3 | 22.1 | 23.6 | 71.2  | 1.601  | 1.9 |
| 4/23/2018 9:36 | 0.1 | 0.9  | 2.9 | 22.1 | 23.4 | 70.4  | 1.5805 | 1.9 |
| 4/23/2018 9:37 | 0.2 | -0.1 | 3.5 | 21.6 | 23.1 | 69.8  | 1.5647 | 1.9 |
| 4/23/2018 9:38 | 0.2 | 0.5  | 4   | 21.5 | 22.9 | 69    | 1.5238 | 1.9 |
| 4/23/2018 9:39 | 0.1 | 0.1  | 2.3 | 21.6 | 22.7 | 68.4  | 1.5452 | 1.9 |
| 4/23/2018 9:40 | 0.1 | -0.4 | 3.5 | 21.2 | 22.5 | 67.6  | 1.5075 | 1.9 |
| 4/23/2018 9:41 | 0.2 | 0.4  | 3.7 | 20.9 | 22.1 | 66.9  | 1.4868 | 1.9 |
| 4/23/2018 9:42 | 0.2 | 0.4  | 2.1 | 21.3 | 22   | 66.3  | 1.4979 | 1.9 |
| 4/23/2018 9:43 | 0.2 | 1    | 3.2 | 21   | 21.9 | 65.7  | 1.4958 | 1.9 |
| 4/23/2018 9:44 | 0.1 | 0.3  | 2.4 | 20.9 | 21.7 | 65.1  | 1.4674 | 1.9 |
| 4/23/2018 9:45 | 0.1 | 0.3  | 3.4 | 20.8 | 21.5 | 64.3  | 1.4617 | 1.9 |
| 4/23/2018 9:46 | 0.1 | 0.3  | 1.6 | 20.9 | 21.4 | 64    | 1.4788 | 1.8 |

|                 |     |      |     |      |      |      |        |     |
|-----------------|-----|------|-----|------|------|------|--------|-----|
| 4/23/2018 9:47  | 0.1 | 0.6  | 2.8 | 20.6 | 21.1 | 63.5 | 1.4296 | 1.9 |
| 4/23/2018 9:48  | 0.1 | -0.4 | 3.8 | 20.6 | 21   | 63   | 1.4428 | 1.9 |
| 4/23/2018 9:49  | 0.1 | 0.2  | 2.6 | 21.1 | 20.8 | 62.5 | 1.4167 | 1.9 |
| 4/23/2018 9:50  | 0.1 | 0.8  | 3.1 | 20.6 | 20.7 | 62.1 | 1.4319 | 1.9 |
| 4/23/2018 9:51  | 0.1 | 0.4  | 3.3 | 20.7 | 20.5 | 61.5 | 1.4107 | 1.9 |
| 4/23/2018 9:52  | 0.1 | -0.1 | 3.1 | 20.2 | 20.4 | 61   | 1.4093 | 1.9 |
| 4/23/2018 9:53  | 0.1 | 0.3  | 2.7 | 20.1 | 20.2 | 60.5 | 1.3733 | 1.8 |
| 4/23/2018 9:54  | 0.1 | 0.6  | 2.7 | 20   | 20   | 59.7 | 1.3519 | 1.9 |
| 4/23/2018 9:55  | 0.2 | 0.9  | 3.4 | 20.2 | 19.8 | 59.2 | 1.3548 | 2   |
| 4/23/2018 9:56  | 0.2 | 0.5  | 3.8 | 19.9 | 19.6 | 58.6 | 1.3356 | 2   |
| 4/23/2018 9:57  | 0.2 | 0.2  | 3   | 20.2 | 19.4 | 58.1 | 1.3241 | 2   |
| 4/23/2018 9:58  | 0.2 | 0.6  | 3.3 | 20.4 | 19.4 | 57.5 | 1.3392 | 1.9 |
| 4/23/2018 9:59  | 0.2 | 0.9  | 3.7 | 19.7 | 19.3 | 57.1 | 1.3089 | 1.9 |
| 4/23/2018 10:00 | 0.1 | 0.3  | 3.8 | 19.8 | 19.1 | 56.4 | 1.3198 | 1.9 |
| 4/23/2018 10:01 | 0.1 | 0.6  | 4.1 | 19.7 | 19   | 55.7 | 1.2858 | 1.8 |
| 4/23/2018 10:02 | 0.2 | -0.1 | 2.4 | 19.7 | 18.8 | 55.5 | 1.302  | 1.8 |
| 4/23/2018 10:03 | 0.2 | 0.4  | 2.4 | 19.8 | 18.6 | 55.1 | 1.2878 | 1.9 |
| 4/23/2018 10:04 | 0.2 | 0.2  | 3.9 | 19.7 | 18.5 | 54.7 | 1.2587 | 1.9 |
| 4/23/2018 10:05 | 0.2 | 0.9  | 3.7 | 19.7 | 18.3 | 54.2 | 1.2726 | 2   |
| 4/23/2018 10:06 | 0.2 | 0.5  | 3.4 | 19.6 | 18.3 | 53.8 | 1.2678 | 1.9 |
| 4/23/2018 10:07 | 0.2 | 0.1  | 3.4 | 19.6 | 18.1 | 53.1 | 1.2348 | 1.8 |
| 4/23/2018 10:08 | 0.2 | 0.9  | 3   | 19.4 | 17.5 | 52.5 | 1.1888 | 1.8 |
| 4/23/2018 10:09 | 0.2 | 0.5  | 2.1 | 18.5 | 17.2 | 51.4 | 1.1086 | 1.7 |
| 4/23/2018 10:10 | 0.2 | 0.4  | 2.8 | 18.5 | 16.9 | 41.4 | 1.0035 | 1.8 |
| 4/23/2018 10:11 | 0.3 | 0.5  | 3.1 | 18.2 | 16.8 | 38.4 | 0.9643 | 1.8 |
| 4/23/2018 10:12 | 0.2 | 0.5  | 3   | 18.1 | 16.6 | 34.5 | 0.9125 | 1.8 |
| 4/23/2018 10:13 | 0.3 | 0.8  | 2.2 | 18.5 | 16.5 | 37.9 | 0.945  | 1.9 |
| 4/23/2018 10:14 | 0.3 | 0.4  | 2.6 | 18.5 | 16.5 | 39.4 | 0.9616 | 1.9 |
| 4/23/2018 10:15 | 0.3 | 0.8  | 3.2 | 18.8 | 16.7 | 39.9 | 1.0971 | 1.9 |
| 4/23/2018 10:16 | 0.3 | 1    | 2.1 | 18.8 | 17.5 | 40.3 | 1.0918 | 2   |
| 4/23/2018 10:17 | 0.4 | 0.8  | 3.5 | 18.7 | 17.9 | 40.1 | 1.0162 | 2   |
| 4/23/2018 10:18 | 0.5 | 0.8  | 3.8 | 18.4 | 18.3 | 39.4 | 0.912  | 2   |
| 4/23/2018 10:19 | 0.6 | 1.3  | 5.1 | 18.6 | 18.5 | 38   | 0.8237 | 2   |
| 4/23/2018 10:20 | 0.7 | 1.4  | 3.6 | 18.3 | 18.7 | 36.3 | 0.7697 | 2   |
| 4/23/2018 10:21 | 0.9 | 1.7  | 1.8 | 18.2 | 18.8 | 34.7 | 0.7495 | 2   |
| 4/23/2018 10:22 | 0.9 | 1.2  | 3.7 | 18.2 | 19   | 32.5 | 0.7184 | 2   |
| 4/23/2018 10:23 | 1   | 1.5  | 3.3 | 18.3 | 18.9 | 29.6 | 0.6605 | 2   |
| 4/23/2018 10:24 | 1.1 | 0.5  | 3.2 | 18.4 | 18.8 | 26.1 | 0.6154 | 1.9 |
| 4/23/2018 10:25 | 1.3 | 2.2  | 4   | 18.4 | 18.7 | 23.5 | 0.5922 | 1.9 |
| 4/23/2018 10:26 | 1.5 | 2.3  | 2   | 18.3 | 18.6 | 20.6 | 0.5494 | 1.9 |
| 4/23/2018 10:27 | 1.7 | 1.9  | 4.1 | 18.7 | 18.3 | 18.2 | 0.5244 | 1.9 |
| 4/23/2018 10:28 | 1.9 | 2.4  | 1.7 | 18.5 | 18.3 | 16.5 | 0.5106 | 1.9 |
| 4/23/2018 10:29 | 2.1 | 2.6  | 2.9 | 18.9 | 18.1 | 14.7 | 0.495  | 1.9 |
| 4/23/2018 10:30 | 2.3 | 2.3  | 3.7 | 19   | 18   | 12.9 | 0.4767 | 2   |
| 4/23/2018 10:31 | 2.6 | 3.6  | 3   | 19.4 | 17.6 | 11.5 | 0.4347 | 2   |
| 4/23/2018 10:32 | 2.9 | 4.3  | 3.3 | 19.5 | 17.1 | 10.3 | 0.4289 | 1.9 |
| 4/23/2018 10:33 | 3.2 | 4.1  | 4.2 | 19.8 | 17   | 9.1  | 0.4097 | 1.9 |

|                 |     |      |     |      |      |       |        |     |
|-----------------|-----|------|-----|------|------|-------|--------|-----|
| 4/23/2018 10:34 | 3.4 | 3.8  | 4   | 20   | 16.7 | 8     | 0.3974 | 1.9 |
| 4/23/2018 10:35 | 3.6 | 4.5  | 3   | 20.2 | 15.9 | 7.3   | 0.3777 | 1.9 |
| 4/23/2018 10:36 | 4   | 5.2  | 4.8 | 20.7 | 15.8 | 6.4   | 0.3564 | 1.8 |
| 4/23/2018 10:37 | 4.4 | 5.8  | 4.6 | 21.4 | 15.3 | 5.7   | 0.3486 | 1.8 |
| 4/23/2018 10:38 | 4.8 | 5.2  | 3.4 | 21.1 | 14   | 5.1   | 0.3241 | 1.9 |
| 4/23/2018 10:39 | 4.9 | 4.1  | 4.2 | 20.8 | 14.7 | 4.6   | 0.3415 | 1.9 |
| 4/23/2018 10:40 | 4.8 | 4.8  | 3.3 | 20.7 | 14.8 | 4.3   | 0.3332 | 1.9 |
| 4/23/2018 10:41 | 4.3 | 4.6  | 3.8 | 20.6 | 14.8 | 3.9   | 0.3403 | 1.9 |
| 4/23/2018 10:42 | 4.1 | 4    | 4.8 | 20.3 | 15   | 3.7   | 0.3375 | 1.9 |
| 4/23/2018 10:43 | 3.8 | 3.7  | 2.9 | 19.9 | 17   | 4.8   | 0.3462 | 1.9 |
| 4/23/2018 10:44 | 2.9 | 1    | 3.4 | 25.8 | 49.7 | 48.2  | 0.6328 | 2   |
| 4/23/2018 10:45 | 1.8 | 1.9  | 3.2 | 39.3 | 65.4 | 112.9 | 1.157  | 2   |
| 4/23/2018 10:46 | 0.7 | 0.4  | 4.3 | 44.1 | 70.8 | 131.8 | 1.4983 | 2.1 |
| 4/23/2018 10:47 | 0.3 | 0.4  | 3.8 | 68.2 | 75.4 | 140.3 | 2.051  | 2.3 |
| 4/23/2018 10:48 | 0.2 | 0.3  | 4.5 | 76.4 | 75.2 | 141   | 2.6096 | 2.5 |
| 4/23/2018 10:49 | 0.2 | 0    | 4.4 | 86.9 | 76.6 | 147.5 | 3.2941 | 2.6 |
| 4/23/2018 10:50 | 0.2 | 0    | 4.1 | 87.5 | 74.3 | 145.2 | 3.8215 | 2.7 |
| 4/23/2018 10:51 | 0.2 | -0.2 | 5   | 88.7 | 73.5 | 145.2 | 4.191  | 2.8 |
| 4/23/2018 10:52 | 0.3 | 0.1  | 4.1 | 83.8 | 69.7 | 138.4 | 4.2958 | 2.8 |
| 4/23/2018 10:53 | 0.3 | 0    | 3.3 | 83.2 | 68.9 | 139.5 | 4.5625 | 2.8 |
| 4/23/2018 10:54 | 0.3 | -0.7 | 4.5 | 80.1 | 67.6 | 137.5 | 4.6507 | 2.8 |
| 4/23/2018 10:55 | 0.2 | 0.1  | 5   | 79.1 | 65.7 | 134.9 | 4.8365 | 2.7 |
| 4/23/2018 10:56 | 0.2 | 0.5  | 3.7 | 76.5 | 65.1 | 135.5 | 4.9322 | 2.8 |
| 4/23/2018 10:57 | 0.2 | 0.3  | 5.5 | 74.9 | 63.2 | 130.9 | 4.9903 | 2.7 |
| 4/23/2018 10:58 | 0.2 | 0.5  | 3.7 | 73.4 | 62.5 | 132.6 | 5.0852 | 2.8 |
| 4/23/2018 10:59 | 0.2 | 0.3  | 3.7 | 70.4 | 60.7 | 129.3 | 5.0133 | 2.8 |
| 4/23/2018 11:00 | 0.2 | 0.5  | 5.4 | 68.6 | 59.4 | 127.4 | 5.0417 | 2.7 |
| 4/23/2018 11:01 | 0.2 | -0.1 | 4.7 | 66   | 58.1 | 127.1 | 4.9335 | 2.7 |
| 4/23/2018 11:02 | 0.3 | 0.3  | 4.6 | 65.3 | 57   | 126.7 | 5.0045 | 2.7 |
| 4/23/2018 11:03 | 0.3 | 0.2  | 4.3 | 63.5 | 56.1 | 126.2 | 5.017  | 2.7 |
| 4/23/2018 11:04 | 0.3 | 1    | 5.5 | 61.4 | 54.4 | 119.2 | 4.8968 | 2.7 |
| 4/23/2018 11:05 | 0.2 | 0.7  | 4.6 | 61   | 54.3 | 120.4 | 5.0015 | 2.7 |
| 4/23/2018 11:06 | 0.2 | 0.1  | 3.6 | 59.7 | 53.5 | 120   | 4.9952 | 2.7 |
| 4/23/2018 11:07 | 0.2 | 0.1  | 4.8 | 58.5 | 52.7 | 118.6 | 4.9693 | 2.6 |
| 4/23/2018 11:08 | 0.2 | 0.9  | 4.4 | 57.8 | 51.9 | 118.4 | 4.9412 | 2.6 |
| 4/23/2018 11:09 | 0.2 | 0.5  | 5.3 | 56.5 | 51.5 | 118.3 | 4.9403 | 2.6 |
| 4/23/2018 11:10 | 0.1 | 0.7  | 5.5 | 54.7 | 50   | 118.1 | 4.8487 | 2.6 |
| 4/23/2018 11:11 | 0.1 | 0.4  | 3.9 | 53.2 | 49   | 116.7 | 4.788  | 2.5 |
| 4/23/2018 11:12 | 0.1 | 0.2  | 4.6 | 50.8 | 47.6 | 111.5 | 4.6763 | 2.5 |
| 4/23/2018 11:13 | 0.2 | -0.1 | 4.7 | 50.3 | 46.2 | 107.6 | 4.5945 | 2.4 |
| 4/23/2018 11:14 | 0.2 | -0.2 | 4   | 50   | 45.7 | 109.4 | 4.6468 | 2.5 |
| 4/23/2018 11:15 | 0.2 | 0.3  | 3.9 | 50.4 | 45.7 | 109.6 | 4.6398 | 2.4 |
| 4/23/2018 11:16 | 0.1 | 0.3  | 4.4 | 47.9 | 45.1 | 109.4 | 4.526  | 2.4 |
| 4/23/2018 11:17 | 0.1 | 0.5  | 5.2 | 47.8 | 44.2 | 109   | 4.5257 | 2.4 |
| 4/23/2018 11:18 | 0.1 | 0.7  | 4.8 | 46.5 | 43.1 | 108.5 | 4.433  | 2.4 |
| 4/23/2018 11:19 | 0.1 | 0.6  | 5   | 44.4 | 41.8 | 104.4 | 4.3198 | 2.4 |
| 4/23/2018 11:20 | 0.1 | 0.8  | 4   | 44.3 | 40.7 | 98.7  | 4.2638 | 2.3 |

|                 |     |      |     |      |      |       |        |     |
|-----------------|-----|------|-----|------|------|-------|--------|-----|
| 4/23/2018 11:21 | 0.1 | 0.6  | 4.8 | 43.7 | 40.8 | 101.1 | 4.3397 | 2.3 |
| 4/23/2018 11:22 | 0.1 | 0.3  | 5.3 | 41.4 | 38.9 | 99    | 4.0757 | 2.2 |
| 4/23/2018 11:23 | 0.1 | 0.3  | 4.9 | 42.1 | 39   | 97.8  | 4.224  | 2.3 |
| 4/23/2018 11:24 | 0.2 | 0.8  | 3.6 | 40.6 | 38.3 | 96    | 4.0813 | 2.3 |
| 4/23/2018 11:25 | 0.2 | 0.9  | 2.9 | 41.7 | 38.3 | 97.7  | 4.2002 | 2.3 |
| 4/23/2018 11:26 | 0.2 | 1.1  | 2.7 | 40.7 | 38.2 | 98.3  | 4.1587 | 2.4 |
| 4/23/2018 11:27 | 0.2 | 0.9  | 5.2 | 39.9 | 37.4 | 95.9  | 4.1065 | 2.4 |
| 4/23/2018 11:28 | 0.2 | -0.1 | 3.3 | 40.6 | 37.6 | 95.5  | 4.1827 | 2.3 |
| 4/23/2018 11:29 | 0.2 | 0.8  | 4.8 | 39.2 | 36.8 | 95.6  | 4.0898 | 2.4 |
| 4/23/2018 11:30 | 0.2 | 0.4  | 4.8 | 37.6 | 35   | 94.9  | 3.9135 | 2.4 |
| 4/23/2018 11:31 | 0.2 | 0.2  | 4   | 38.4 | 35.3 | 94.6  | 4.0207 | 2.5 |
| 4/23/2018 11:32 | 0.2 | 0.5  | 4.3 | 36.3 | 34.3 | 93.2  | 3.8878 | 2.4 |
| 4/23/2018 11:33 | 0.3 | 0.4  | 3.3 | 35.4 | 32.8 | 86    | 3.7215 | 2.5 |
| 4/23/2018 11:34 | 0.3 | 1    | 3   | 36.3 | 33.3 | 90.3  | 3.8395 | 2.5 |
| 4/23/2018 11:35 | 0.3 | 0.4  | 4.1 | 35.8 | 32.9 | 87.6  | 3.8223 | 2.5 |
| 4/23/2018 11:36 | 0.3 | 0.1  | 2.9 | 35.4 | 32.3 | 85.7  | 3.7835 | 2.5 |
| 4/23/2018 11:37 | 0.3 | -0.1 | 4.3 | 35   | 31.8 | 85.8  | 3.7653 | 2.4 |
| 4/23/2018 11:38 | 0.3 | 0.4  | 3.7 | 34.4 | 31.2 | 85.7  | 3.7058 | 2.5 |
| 4/23/2018 11:39 | 0.3 | 0.4  | 3.3 | 33.9 | 31.1 | 85.7  | 3.715  | 2.4 |
| 4/23/2018 11:40 | 0.2 | 0.7  | 2.5 | 33.4 | 30.3 | 84.4  | 3.6402 | 2.5 |
| 4/23/2018 11:41 | 0.3 | 0.8  | 4.4 | 33.8 | 29.9 | 83.3  | 3.6618 | 2.5 |
| 4/23/2018 11:42 | 0.3 | 0.5  | 4.1 | 32.4 | 29.5 | 81.3  | 3.5923 | 2.5 |
| 4/23/2018 11:43 | 0.3 | 0.7  | 5.2 | 31.8 | 28.7 | 76.8  | 3.4713 | 2.4 |
| 4/23/2018 11:44 | 0.3 | 0.7  | 2.6 | 31.8 | 28.3 | 75.7  | 3.4877 | 2.3 |
| 4/23/2018 11:45 | 0.3 | 0.6  |     | 31.9 | 28.6 | 76.3  | 3.519  | 2.3 |
| 4/23/2018 11:46 | 0.4 | 0.5  | 4.8 | 32.3 | 28.3 | 76.9  | 3.5647 | 2.2 |
| 4/23/2018 11:47 | 0.3 | 0.8  |     | 31.9 | 28.4 | 77.6  | 3.5712 | 2.2 |
| 4/23/2018 11:48 | 0.3 | 0.4  |     | 31   | 27.7 | 78.2  | 3.505  | 2.2 |
| 4/23/2018 11:49 | 0.3 | 1.3  | 3.8 | 30.7 | 27.1 | 78.4  | 3.4398 | 2.2 |
| 4/23/2018 11:50 | 0.3 | 0.1  | 3.5 | 30.6 | 26.8 | 78.7  | 3.4105 | 2.3 |
| 4/23/2018 11:51 | 0.3 | 0.3  | 4.3 | 30.3 | 26.2 | 78.7  | 3.3482 | 2.3 |
| 4/23/2018 11:52 | 0.3 | 0.4  |     | 28.9 | 25.3 | 70.5  | 3.1815 | 2.3 |
| 4/23/2018 11:53 | 0.3 | 0.4  | 4.2 | 29.9 | 25.7 | 73.5  | 3.343  | 2.3 |
| 4/23/2018 11:54 | 0.3 | 0.7  | 4.3 | 29.3 | 25.3 | 72.8  | 3.2815 | 2.3 |
| 4/23/2018 11:55 | 0.3 | 0.3  | 3.3 | 28.2 | 24.5 | 72.1  | 3.1852 | 2.2 |
| 4/23/2018 11:56 | 0.3 | 0.9  | 4.8 | 28.5 | 24   | 71.6  | 3.1002 | 2.1 |
| 4/23/2018 11:57 | 0.3 | 0.1  | 4.2 | 28.4 | 24.3 | 71.4  | 3.18   | 2   |
| 4/23/2018 11:58 | 0.3 | 0.4  |     | 28   | 23.8 | 71.2  | 3.1327 | 2   |
| 4/23/2018 11:59 | 0.3 | 0.8  |     | 27.1 | 23   | 70.6  | 3.021  | 2   |
| 4/23/2018 12:00 | 0.2 | 0.6  |     | 27.9 | 23.1 | 70.1  | 3.1192 | 2   |
| 4/23/2018 12:01 | 0.2 | -0.2 | 5.1 | 27.9 | 23.3 | 69.9  | 3.1458 | 2   |
| 4/23/2018 12:02 | 0.2 | -0.2 |     | 26.2 | 22.5 | 69.2  | 3.0157 | 2   |
| 4/23/2018 12:03 | 0.1 | 1.2  | 4.2 | 25.7 | 21.1 | 68    | 2.8402 | 2   |
| 4/23/2018 12:04 | 0.2 | 0.6  | 4.4 | 24.5 | 20.1 | 58.5  | 2.6037 | 1.9 |
| 4/23/2018 12:05 | 0.2 | 0.4  | 4.6 | 22   | 19.1 | 51.8  | 2.3463 | 1.9 |
| 4/23/2018 12:06 | 0.4 | 1    | 4.6 | 19.9 | 16.6 | 34.9  | 1.8527 | 1.8 |
| 4/23/2018 12:07 | 0.5 | 0.8  | 3.5 | 19.3 | 15.8 | 31.3  | 1.6755 | 1.9 |

|                 |      |      |      |      |      |      |        |     |
|-----------------|------|------|------|------|------|------|--------|-----|
| 4/23/2018 12:08 | 0.6  | 1.1  | 4    | 19   | 15.6 | 30.8 | 1.6203 | 1.9 |
| 4/23/2018 12:09 | 0.6  | 1.3  | 3.9  | 19.7 | 15   | 27.2 | 1.6613 | 1.9 |
| 4/23/2018 12:10 | 1    | 3.6  | 5    | 20.6 | 16.2 | 30.4 | 1.8518 | 1.9 |
| 4/23/2018 12:11 | 2.4  | 7.2  | 5.3  | 22.4 | 14.2 | 14   | 1.1713 | 1.8 |
| 4/23/2018 12:12 | 4.7  | 9.9  | 6.1  | 24   | 12.4 | 8.1  | 0.8439 | 1.7 |
| 4/23/2018 12:13 | 7.1  | 10.9 | 5.9  | 25.6 | 11.4 | 5.6  | 0.6697 | 1.6 |
| 4/23/2018 12:14 | 8.6  | 11.9 | 7.5  | 26.7 | 10.7 | 4.8  | 0.6252 | 1.6 |
| 4/23/2018 12:15 | 9.9  | 14.4 | 7.9  | 28.2 | 10.1 | 4.7  | 0.5198 | 1.6 |
| 4/23/2018 12:16 | 11.1 | 14.8 | 7.2  | 28.8 | 10   | 4.6  | 0.5338 | 1.6 |
| 4/23/2018 12:17 | 12   | 14.7 | 8.2  | 28.9 | 9.8  | 4.5  | 0.5108 | 1.6 |
| 4/23/2018 12:18 | 12.2 | 14.1 | 8.8  | 28.9 | 9.4  | 4.5  | 0.5466 | 1.6 |
| 4/23/2018 12:19 | 12.3 | 14.3 | 7.3  | 28.8 | 9.1  | 4.4  | 0.5327 | 1.6 |
| 4/23/2018 12:20 | 12.3 | 14.4 | 8.3  | 29.2 | 9.3  | 4.4  | 0.4931 | 1.6 |
| 4/23/2018 12:21 | 12.7 | 15.6 | 7.6  | 29.2 | 9.5  | 4.2  | 0.4603 | 1.6 |
| 4/23/2018 12:22 | 13   | 14.7 | 8.6  | 29.4 | 9.2  | 4.1  | 0.4537 | 1.6 |
| 4/23/2018 12:23 | 13.3 | 15.3 | 6.3  | 29.8 | 8.9  | 3.9  | 0.4767 | 1.6 |
| 4/23/2018 12:24 | 13.5 | 16   | 9.2  | 30.3 | 8.4  | 3.8  | 0.4342 | 1.6 |
| 4/23/2018 12:25 | 14.1 | 16.9 | 8.9  | 31.1 | 7.7  | 3.7  | 0.4052 | 1.6 |
| 4/23/2018 12:26 | 14.9 | 17.8 | 8.1  | 32   | 7.4  | 3.5  | 0.395  | 1.5 |
| 4/23/2018 12:27 | 15.9 | 19   | 9.6  | 32.9 | 6.8  | 3.2  | 0.3618 | 1.5 |
| 4/23/2018 12:28 | 16.6 | 18.8 | 9.3  | 32.7 | 6.5  | 2.9  | 0.3674 | 1.6 |
| 4/23/2018 12:29 | 16.8 | 20.2 | 8.8  | 33.5 | 6.7  | 2.8  | 0.3724 | 1.6 |
| 4/23/2018 12:30 | 17.2 | 19.8 | 11.3 | 33.6 | 6.5  | 2.6  | 0.3384 | 1.5 |
| 4/23/2018 12:31 | 17.7 | 20.7 | 10.4 | 34.9 | 6.1  | 2.4  | 0.308  | 1.5 |
| 4/23/2018 12:32 | 18.6 | 22   | 10.7 | 35.1 | 5.7  | 2.2  | 0.2844 | 1.5 |
| 4/23/2018 12:33 | 19.6 | 23.5 | 11.3 | 36   | 5.2  | 2    | 0.2772 | 1.5 |
| 4/23/2018 12:34 | 20.3 | 23.4 | 10   | 36.4 | 4.9  | 1.9  | 0.2586 | 1.5 |
| 4/23/2018 12:35 | 20.4 | 22   | 10.7 | 35.2 | 5.3  | 1.7  | 0.287  | 1.5 |
| 4/23/2018 12:36 | 20.1 | 21.9 | 11.8 | 34.9 | 5.7  | 1.7  | 0.2941 | 1.4 |
| 4/23/2018 12:37 | 19.4 | 21.4 | 11.1 | 34.8 | 5.6  | 1.6  | 0.2792 | 1.4 |
| 4/23/2018 12:38 | 19.3 | 22.7 | 10.4 | 35.4 | 5.5  | 1.5  | 0.2785 | 1.5 |
| 4/23/2018 12:39 | 20   | 24.2 | 11.8 | 36.8 | 4.9  | 1.4  | 0.2429 | 1.5 |
| 4/23/2018 12:40 | 21   | 24.3 | 12.5 | 37.4 | 4.4  | 1.3  | 0.2358 | 1.5 |
| 4/23/2018 12:41 | 22   | 24.5 | 13.1 | 37.8 | 4.1  | 1.3  | 0.24   | 1.5 |
| 4/23/2018 12:42 | 22.5 | 24.2 | 13.3 | 37.7 | 4    | 1.3  | 0.2275 | 1.6 |
| 4/23/2018 12:43 | 22.7 | 25   | 12.4 | 37.9 | 3.8  | 1.2  | 0.2385 | 1.6 |
| 4/23/2018 12:44 | 23.1 | 27   | 14.1 | 39.6 | 3.4  | 1.2  | 0.2053 | 1.7 |
| 4/23/2018 12:45 | 23.7 | 26   | 11.6 | 39.2 | 3.3  | 1.1  | 0.2122 | 1.6 |
| 4/23/2018 12:46 | 24.3 | 26   | 12.6 | 39.4 | 3.1  | 1    | 0.2031 | 1.7 |
| 4/23/2018 12:47 | 24.2 | 25.8 | 10.7 | 38.9 | 3.3  | 0.9  | 0.2039 | 1.7 |
| 4/23/2018 12:48 | 24   | 25.5 | 12.2 | 38.8 | 3.5  | 0.9  | 0.2032 | 1.8 |
| 4/23/2018 12:49 | 23.9 | 26.3 | 13.3 | 39   | 3.4  | 0.9  | 0.1929 | 1.8 |
| 4/23/2018 12:50 | 23.9 | 25.8 | 13.1 | 39   | 3.1  | 0.8  | 0.2063 | 1.8 |
| 4/23/2018 12:51 | 23.9 | 26.4 | 13.6 | 39.3 | 3.2  | 0.8  | 0.207  | 1.8 |
| 4/23/2018 12:52 | 24.2 | 26   | 11.8 | 39.1 | 3    | 0.8  | 0.2005 | 1.7 |
| 4/23/2018 12:53 | 23.1 | 21.1 | 9.1  | 35.1 | 4.2  | 0.8  | 0.2642 | 1.7 |
| 4/23/2018 12:54 | 21.2 | 19.3 | 9.5  | 33.8 | 4.9  | 0.8  | 0.2765 | 1.7 |

|                 |      |      |      |      |      |      |        |     |
|-----------------|------|------|------|------|------|------|--------|-----|
| 4/23/2018 12:55 | 19   | 19.8 | 9.1  | 33.7 | 4.6  | 0.9  | 0.2695 | 1.7 |
| 4/23/2018 12:56 | 17.9 | 17.1 | 9.4  | 36   | 4.4  | 1    | 0.2708 | 1.6 |
| 4/23/2018 12:57 | 17.9 | 21   | 12.6 | 31   | 4.2  | 1.1  | 0.2498 | 1.6 |
| 4/23/2018 12:58 | 18.2 | 20   | 12.9 | 33   | 4.3  | 1.1  | 0.2603 | 1.5 |
| 4/23/2018 12:59 | 18.6 | 20.3 | 12.6 | 33.2 | 4.2  | 1.2  | 0.2425 | 1.6 |
| 4/23/2018 13:00 | 18.3 | 18.9 | 12.7 | 32.5 | 4.3  | 1.3  | 0.2576 | 1.6 |
| 4/23/2018 13:01 | 17.7 | 17.9 | 11.1 | 32.2 | 4.4  | 1.3  | 0.2577 | 1.7 |
| 4/23/2018 13:02 | 17   | 17.2 | 12.3 | 31.9 | 4.5  | 1.4  | 0.2621 | 1.7 |
| 4/23/2018 13:03 | 16.4 | 17.5 | 10.2 | 31.5 | 4.5  | 1.4  | 0.2726 | 1.7 |
| 4/23/2018 13:04 | 15.9 | 16.6 | 10   | 30.6 | 4.5  | 1.4  | 0.2661 | 1.7 |
| 4/23/2018 13:05 | 15.4 | 15.4 | 10.6 | 30.1 | 4.6  | 1.4  | 0.2816 | 1.7 |
| 4/23/2018 13:06 | 13.9 | 10.1 | 7.6  | 26.7 | 14.3 | 15.3 | 0.3277 | 1.7 |
| 4/23/2018 13:07 | 10.9 | 6    | 4.8  | 27.2 | 33.4 | 34.6 | 0.5305 | 1.7 |
| 4/23/2018 13:08 | 6.7  | 2.4  | 3.2  | 29.8 | 46.8 | 50.8 | 0.8197 | 1.9 |
| 4/23/2018 13:09 | 3.1  | 0.5  | 5    | 39.4 | 60.5 | 66.8 | 1.275  | 2   |
| 4/23/2018 13:10 | 1.1  | 0.6  | 3.6  | 43.8 | 63.1 | 73.4 | 1.4872 | 2   |
| 4/23/2018 13:11 | 0.5  | 0.6  | 4.5  | 50.4 | 66.1 | 78.2 | 1.7472 | 2   |
| 4/23/2018 13:12 | 0.3  | 0.4  | 3.8  | 53.8 | 68   | 79.9 | 1.9473 | 1.9 |
| 4/23/2018 13:13 | 0.3  | 0.7  | 4.9  | 56.3 | 68.4 | 79.3 | 2.1132 | 1.8 |
| 4/23/2018 13:14 | 0.3  | 1.2  | 6.2  | 58.7 | 68.3 | 79.4 | 2.3247 | 1.9 |
| 4/23/2018 13:15 | 0.3  | 0.4  | 5.9  | 60.5 | 70.3 | 79.8 | 2.5993 | 1.9 |
| 4/23/2018 13:16 | 0.3  | 0    | 5.4  | 61.9 | 70.2 | 80.3 | 2.9118 | 2   |
| 4/23/2018 13:17 | 0.3  | 0.5  | 6.3  | 62   | 70.2 | 80.7 | 3.2268 | 2   |
| 4/23/2018 13:18 | 0.3  | 1.4  | 6.2  | 60.6 | 69.5 | 80.9 | 3.3775 | 2   |
| 4/23/2018 13:19 | 0.3  | 0.7  | 7.3  | 61.2 | 66   | 81   | 3.5421 | 2.1 |
| 4/23/2018 13:20 | 0.3  | 1.2  | 4.4  | 60.9 | 65.3 | 81.1 | 3.7715 | 2.1 |
| 4/23/2018 13:21 | 0.3  | 0.4  | 6.3  | 58.4 | 63.6 | 81.1 | 3.8244 | 2.1 |
| 4/23/2018 13:22 | 0.3  | 0    | 4.5  | 56.6 | 61.2 | 76.6 | 3.9758 | 2.1 |
| 4/23/2018 13:23 | 0.3  | 0.1  | 4.7  | 56.8 | 60.4 | 75.9 | 4.1522 | 2.2 |
| 4/23/2018 13:24 | 0.3  | -0.2 | 5.3  | 55.1 | 59.9 | 74   | 4.2242 | 2.2 |
| 4/23/2018 13:25 | 0.3  | 0.6  | 6.5  | 53.9 | 58.3 | 73.9 | 4.2905 | 2.2 |
| 4/23/2018 13:26 | 0.3  | 0.2  | 6.3  | 53   | 57.7 | 73.8 | 4.4578 | 2.2 |
| 4/23/2018 13:27 | 0.3  | 0.3  | 5.3  | 51.1 | 56.8 | 73.5 | 4.5497 | 2.3 |
| 4/23/2018 13:28 | 0.3  | 0.2  | 5.2  | 50   | 55.4 | 73.2 | 4.5848 | 2.3 |
| 4/23/2018 13:29 | 0.3  | 0.2  | 4.7  | 48.9 | 54.6 | 72.7 | 4.5881 | 2.4 |
| 4/23/2018 13:30 | 0.3  | 0    | 5.8  | 47   | 53   | 72   | 4.5097 | 2.3 |
| 4/23/2018 13:31 | 0.3  | 0.4  | 6.3  | 45.6 | 51.7 | 71.1 | 4.5343 | 2.3 |
| 4/23/2018 13:32 | 0.4  | 0.8  | 5.1  | 46.1 | 50.8 | 70.2 | 4.5223 | 2.3 |
| 4/23/2018 13:33 | 0.3  | 0.1  | 5.7  | 45.2 | 51.3 | 69.3 | 4.6268 | 2.4 |
| 4/23/2018 13:34 | 0.4  | 0.1  | 5.4  | 43.3 | 49.7 | 68.2 | 4.4704 | 2.4 |
| 4/23/2018 13:35 | 0.4  | 0.2  | 6.1  | 43.2 | 49.1 | 67.2 | 4.4863 | 2.3 |
| 4/23/2018 13:36 | 0.4  | 0.5  | 2.5  | 41.9 | 48.3 | 66.3 | 4.4668 | 2.3 |
| 4/23/2018 13:37 | 0.4  | 0.5  | 5.7  | 40.9 | 46.9 | 63   | 4.3438 | 2.3 |
| 4/23/2018 13:38 | 0.4  | 1.3  | 5.4  | 40.4 | 46.5 | 60.6 | 4.3625 | 2.3 |
| 4/23/2018 13:39 | 0.4  | 0.4  | 3.7  | 39.8 | 45.7 | 60.4 | 4.3132 | 2.3 |
| 4/23/2018 13:40 | 0.4  | 0.6  | 5.1  | 39.9 | 45.1 | 60   | 4.3126 | 2.2 |
| 4/23/2018 13:41 | 0.4  | 1    | 3.7  | 38.7 | 45.1 | 60.6 | 4.3059 | 2.1 |



|                 |     |      |     |      |      |      |        |     |
|-----------------|-----|------|-----|------|------|------|--------|-----|
| 4/23/2018 13:42 | 0.4 | 0.1  | 6.9 | 38.5 | 44.1 | 60.4 | 4.2501 | 2.1 |
| 4/23/2018 13:43 | 0.4 | 0.3  | 4.7 | 37.3 | 43.6 | 60.1 | 4.2192 | 2   |
| 4/23/2018 13:44 | 0.3 | 0.8  | 3.6 | 36.1 | 42.4 | 59.6 | 4.0808 | 2   |
| 4/23/2018 13:45 | 0.4 | 0.9  | 4.4 | 35.3 | 40.8 | 54.7 | 3.9559 | 2   |
| 4/23/2018 13:46 | 0.4 | 0.3  | 3.7 | 36.2 | 41.3 | 55.5 | 4.072  | 2.1 |
| 4/23/2018 13:47 | 0.4 | 1    | 5.2 | 34.5 | 40.3 | 53.2 | 3.9298 | 2.1 |
| 4/23/2018 13:48 | 0.5 | 0.8  | 4.8 | 33.3 | 38.9 | 51.5 | 3.8232 | 2.2 |
| 4/23/2018 13:49 | 0.5 | 0.2  | 5   | 32.9 | 37.2 | 50.8 | 3.7081 | 2.1 |
| 4/23/2018 13:50 | 0.4 | 0.8  | 5.4 | 33.3 | 38.6 | 50.9 | 3.8368 | 2.1 |
| 4/23/2018 13:51 | 0.4 | 0.8  | 2.7 | 32.7 | 38   | 50.9 | 3.7836 | 2.1 |
| 4/23/2018 13:52 | 0.4 | 0.6  | 4.1 | 32.3 | 37.1 | 50.8 | 3.7041 | 2.1 |
| 4/23/2018 13:53 | 0.3 | 1.2  | 3.7 | 32   | 36.9 | 50.6 | 3.7238 | 2   |
| 4/23/2018 13:54 | 0.3 | 0.9  | 4.4 | 31.8 | 36.2 | 50.4 | 3.6543 | 2   |
| 4/23/2018 13:55 | 0.3 | 1.1  | 3.7 | 31.8 | 36   | 50.2 | 3.639  | 2   |
| 4/23/2018 13:56 | 0.3 | 0.7  | 4   | 30.7 | 35.8 | 49.9 | 3.6204 | 2   |
| 4/23/2018 13:57 | 0.4 | 1    | 5.7 | 29.4 | 34.1 | 48.1 | 3.4484 | 2   |
| 4/23/2018 13:58 | 0.4 | 0.4  | 5.2 | 29.3 | 33.5 | 44.9 | 3.4111 | 2   |
| 4/23/2018 13:59 | 0.5 | 1.3  | 3.7 | 29.6 | 32.7 | 44   | 3.3808 | 2   |
| 4/23/2018 14:00 | 0.5 | 0.6  | 3.9 | 29   | 33.1 | 43.9 | 3.3754 | 2.2 |
| 4/23/2018 14:01 | 0.5 | -0.1 | 5.3 | 29.5 | 32.7 | 42.4 | 3.4109 | 2.2 |
| 4/23/2018 14:02 | 0.5 | 0.2  | 3.6 | 28.9 | 32.5 | 42.6 | 3.3672 | 2.1 |
| 4/23/2018 14:03 | 0.5 | -0.1 | 3.2 | 28.7 | 32.1 | 42.7 | 3.3426 | 2   |
| 4/23/2018 14:04 | 0.4 | 0.8  | 3.4 | 28.2 | 31.5 | 42.7 | 3.2807 | 2.1 |
| 4/23/2018 14:05 | 0.4 | 0.8  | 4.8 | 27.7 | 31.3 | 42.6 | 3.2592 | 2.1 |
| 4/23/2018 14:06 | 0.5 | 1    | 3.5 | 27.1 | 29.8 | 42.1 | 3.1166 | 2.1 |
| 4/23/2018 14:07 | 0.5 | 0.5  | 3.5 | 27.7 | 30.5 | 42   | 3.201  | 2.1 |
| 4/23/2018 14:08 | 0.5 | 1    | 3.6 | 26.5 | 29.5 | 41.6 | 3.0866 | 2   |
| 4/23/2018 14:09 | 0.4 | 0.7  | 4.7 | 27.1 | 29.5 | 41.2 | 3.1286 | 2   |
| 4/23/2018 14:10 | 0.4 | 1.1  | 3   | 26.2 | 29   | 40.6 | 3.0588 | 2.1 |
| 4/23/2018 14:11 | 0.4 | 1.3  | 3.4 | 26.1 | 28.9 | 40   | 3.0567 | 2.1 |
| 4/23/2018 14:12 | 0.5 | 1    | 4.2 | 25.8 | 27.9 | 39.3 | 2.9663 | 2.1 |
| 4/23/2018 14:13 | 0.4 | 1    | 3.1 | 26.2 | 28.2 | 38.7 | 3.0188 | 2.1 |
| 4/23/2018 14:14 | 0.4 | 1.2  | 3.1 | 25.4 | 27.5 | 38.4 | 2.9294 | 2.1 |
| 4/23/2018 14:15 | 0.5 | 0.7  | 4.1 | 24.9 | 26.7 | 37.9 | 2.8472 | 2.1 |
| 4/23/2018 14:16 | 0.5 | 0.8  | 4.4 | 25.5 | 26.8 | 37.4 | 2.8839 | 2.2 |
| 4/23/2018 14:17 | 0.5 | 0.9  | 4.4 | 25   | 26.2 | 37   | 2.8083 | 2.1 |
| 4/23/2018 14:18 | 0.6 | 1    | 5.5 | 24.2 | 26.1 | 36.2 | 2.6689 | 2.2 |
| 4/23/2018 14:19 | 0.6 | 0.8  | 3.2 | 24.3 | 25.9 | 35.5 | 2.7606 | 2.2 |
| 4/23/2018 14:20 | 0.6 | 1.4  | 2.6 | 24   | 25.1 | 34.9 | 2.6982 | 2.2 |
| 4/23/2018 14:21 | 0.5 | 0.6  | 3.1 | 24.3 | 25.2 | 34.5 | 2.7392 | 2   |
| 4/23/2018 14:22 | 0.5 | 1.2  | 3.4 | 23.2 | 24.2 | 33.8 | 2.589  | 2   |
| 4/23/2018 14:23 | 0.6 | 1.7  | 4   | 23.6 | 23.1 | 32.9 | 2.4868 | 2   |
| 4/23/2018 14:24 | 0.6 | 0.5  | 4.4 | 23.4 | 23.8 | 32.4 | 2.5869 | 2.1 |
| 4/23/2018 14:25 | 0.7 | 1.2  | 3.5 | 22.5 | 22.1 | 31.4 | 2.3373 | 2.2 |
| 4/23/2018 14:26 | 0.7 | 1.3  | 3.4 | 22.3 | 21.7 | 30.5 | 2.3803 | 2.1 |
| 4/23/2018 14:27 | 0.8 | 1.2  | 2.1 | 21.3 | 20.7 | 29.4 | 2.2083 | 2.1 |
| 4/23/2018 14:28 | 1   | 2.3  | 4.8 | 21.3 | 19.5 | 28.3 | 2.0849 | 2.1 |

|                 |      |      |      |      |      |       |        |     |
|-----------------|------|------|------|------|------|-------|--------|-----|
| 4/23/2018 14:29 | 1    | 1.3  | 3.9  | 22.3 | 21.1 | 27.4  | 2.2813 | 2.1 |
| 4/23/2018 14:30 | 1.1  | 2    | 4.5  | 20.8 | 19.7 | 26.1  | 2.0322 | 2   |
| 4/23/2018 14:31 | 1.1  | 1.2  | 3.6  | 20.6 | 19   | 25.3  | 1.9195 | 2   |
| 4/23/2018 14:32 | 1.1  | 1.4  | 3.3  | 20.1 | 19.1 | 24    | 1.9384 | 2.1 |
| 4/23/2018 14:33 | 1.1  | 2.5  | 3.8  | 19.9 | 17.8 | 22.7  | 1.7798 | 2.1 |
| 4/23/2018 14:34 | 1.4  | 2.7  | 4.4  | 19.7 | 15.5 | 15.8  | 1.5072 | 2.1 |
| 4/23/2018 14:35 | 1.8  | 2.9  | 4.2  | 19.6 | 16   | 14.4  | 1.5698 | 2   |
| 4/23/2018 14:36 | 3.1  | 9.7  | 6.8  | 23.2 | 13.5 | 11.5  | 1.2619 | 2   |
| 4/23/2018 14:37 | 6.6  | 15.9 | 11.6 | 28.1 | 9.1  | 4.5   | 0.7375 | 1.9 |
| 4/23/2018 14:38 | 11.1 | 18.7 | 10.6 | 30.8 | 7.4  | 3.9   | 0.5616 | 1.9 |
| 4/23/2018 14:39 | 15.4 | 21.7 | 13.7 | 33.1 | 6.3  | 3.6   | 0.4415 | 2   |
| 4/23/2018 14:40 | 17.6 | 21.4 | 13.6 | 33.8 | 5.3  | 3.3   | 0.413  | 2   |
| 4/23/2018 14:41 | 19   | 22.7 | 13.8 | 34.9 | 5.1  | 3     | 0.3686 | 2   |
| 4/23/2018 14:42 | 19.8 | 22.4 | 12.3 | 34.7 | 5.1  | 2.7   | 0.3953 | 2   |
| 4/23/2018 14:43 | 19.9 | 21.5 | 12.8 | 34.2 | 5.6  | 2.5   | 0.4137 | 2   |
| 4/23/2018 14:44 | 19.9 | 21.7 | 11   | 34.2 | 5.7  | 2.2   | 0.4171 | 1.9 |
| 4/23/2018 14:45 | 19.7 | 23.2 | 13.6 | 34.8 | 5.7  | 1.9   | 0.3824 | 1.8 |
| 4/23/2018 14:46 | 20.1 | 23.2 | 14.4 | 34.9 | 5.6  | 1.7   | 0.326  | 1.8 |
| 4/23/2018 14:47 | 20.9 | 23.8 | 14.4 | 36.1 | 5.4  | 1.5   | 0.32   | 1.7 |
| 4/23/2018 14:48 | 21.7 | 23.7 | 15.4 | 36.3 | 5.2  | 1.5   | 0.3228 | 1.6 |
| 4/23/2018 14:49 | 22   | 23.4 | 14.1 | 35.9 | 5    | 1.5   | 0.3336 | 1.6 |
| 4/23/2018 14:50 | 20.9 | 18.6 | 11.8 | 31.9 | 6.6  | 1.4   | 0.4257 | 1.7 |
| 4/23/2018 14:51 | 18.3 | 14.5 | 10.1 | 29.2 | 9.9  | 1.5   | 0.6388 | 1.9 |
| 4/23/2018 14:52 | 15.4 | 13.6 | 9.1  | 28.4 | 10.6 | 1.6   | 0.6523 | 2   |
| 4/23/2018 14:53 | 13.1 | 12.9 | 8.8  | 27.5 | 11.1 | 1.6   | 0.6879 | 2.1 |
| 4/23/2018 14:54 | 12.2 | 11.9 | 7.5  | 27   | 11.7 | 1.8   | 0.7385 | 2.1 |
| 4/23/2018 14:55 | 11.4 | 11.8 | 7.4  | 26.4 | 11.8 | 1.9   | 0.731  | 2.1 |
| 4/23/2018 14:56 | 10.6 | 10.8 | 8.6  | 25.8 | 11.7 | 2     | 0.7451 | 2.2 |
| 4/23/2018 14:57 | 9.8  | 9.3  | 7.2  | 24.4 | 12.6 | 3.1   | 0.7454 | 2.2 |
| 4/23/2018 14:58 | 7.9  | 3    | 5.2  | 22.2 | 39.1 | 38.9  | 0.911  | 2.2 |
| 4/23/2018 14:59 | 5    | 1.7  | 4.9  | 35.9 | 53.8 | 70    | 1.3548 | 2.2 |
| 4/23/2018 15:00 | 2.1  | 0.5  | 4.9  | 58.6 | 64.6 | 103.5 | 2.2398 | 2.4 |
| 4/23/2018 15:01 | 0.5  | 1.3  | 6.5  | 70.4 | 64.4 | 121.9 | 2.7005 | 2.5 |
| 4/23/2018 15:02 | 0.2  | -0.2 | 5.8  | 76.6 | 65.1 | 126.3 | 3.0515 | 2.5 |
| 4/23/2018 15:03 | 0.2  | 0.6  | 6.7  | 88.6 | 65.6 | 128.4 | 3.5925 | 2.6 |
| 4/23/2018 15:04 | 0.2  | -0.3 | 6.8  | 89.9 | 63.8 | 129.4 | 3.8613 | 2.7 |
| 4/23/2018 15:05 | 0.2  | 0.6  |      | 89.9 | 62.6 | 126.1 | 4.1377 | 2.8 |
| 4/23/2018 15:06 | 0.2  | 0.5  |      | 89   | 59.7 | 119.8 | 4.1718 | 2.8 |
| 4/23/2018 15:07 | 0.2  | -0.9 | 7.1  | 87.6 | 59.3 | 120.2 | 4.358  | 2.8 |
| 4/23/2018 15:08 | 0.3  | 0.3  |      | 85.4 | 57.8 | 118   | 4.3478 | 2.8 |
| 4/23/2018 15:09 | 0.2  | 0.1  | 6.6  | 83   | 57   | 117.7 | 4.3978 | 2.7 |
| 4/23/2018 15:10 | 0.2  | 0.5  | 5.1  | 79.1 | 54.5 | 109.1 | 4.2922 | 2.6 |
| 4/23/2018 15:11 | 0.3  | 0.4  | 6.1  | 77.3 | 54.4 | 111.1 | 4.3575 | 2.6 |
| 4/23/2018 15:12 | 0.3  | 0.3  | 6.8  | 74.7 | 52.5 | 106.6 | 4.2832 | 2.5 |
| 4/23/2018 15:13 | 0.3  | 0.2  | 5.9  | 73.3 | 52.2 | 107.6 | 4.3443 | 2.5 |
| 4/23/2018 15:14 | 0.3  | 0.4  |      | 69.3 | 49.8 | 106.9 | 4.1833 | 2.5 |
| 4/23/2018 15:15 | 0.3  | 0.1  | 6.7  | 69.1 | 49.7 | 106.1 | 4.2508 | 2.4 |

|                 |     |     |     |      |      |      |        |     |
|-----------------|-----|-----|-----|------|------|------|--------|-----|
| 4/23/2018 15:16 | 0.4 | 1.3 | 4.6 | 64.2 | 47.8 | 98.8 | 4.0715 | 2.4 |
| 4/23/2018 15:17 | 0.3 | 0.9 |     | 65.8 | 47.5 | 97.7 | 4.1585 | 2.4 |
| 4/23/2018 15:18 | 0.3 | 0   |     | 63.1 | 47.4 | 97.4 | 4.127  | 2.4 |
| 4/23/2018 15:19 | 0.3 | 0.4 | 5.3 | 59.8 | 47   | 94.4 | 4.0033 | 2.5 |
| 4/23/2018 15:20 | 0.3 | 0.6 | 5   | 61.4 | 46.9 | 94.5 | 4.0432 | 2.5 |
| 4/23/2018 15:21 | 0.3 | 0.3 |     | 56.6 | 44.4 | 93.3 | 3.9465 | 2.5 |
| 4/23/2018 15:22 | 0.3 | 0.8 |     | 57.5 | 42.9 | 90.9 | 3.8967 | 2.4 |
| 4/23/2018 15:23 | 0.3 | 0.9 |     | 56.6 | 43.6 | 91.1 | 3.9658 | 2.4 |
| 4/23/2018 15:24 | 0.2 | 0.6 | 3.9 | 54.4 | 42.4 | 89.2 | 3.8728 | 2.4 |
| 4/23/2018 15:25 | 0.2 | 0.4 | 4.3 | 52.2 | 41.2 | 88.9 | 3.7673 | 2.4 |
| 4/23/2018 15:26 | 0.3 | 0.8 | 5.9 | 50   | 39.3 | 87.9 | 3.5997 | 2.4 |
| 4/23/2018 15:27 | 0.3 | 1   |     | 49   | 39.3 | 84.2 | 3.6073 | 2.5 |
| 4/23/2018 15:28 | 0.3 | 0.1 | 3.9 | 49.6 | 38.5 | 79.7 | 3.6353 | 2.5 |
| 4/23/2018 15:29 | 0.3 | 0.9 | 5.5 | 47.9 | 38.5 | 81.4 | 3.5893 | 2.5 |
| 4/23/2018 15:30 | 0.3 | 1.1 | 9   | 46.4 | 37.3 | 78.4 | 3.5415 | 2.5 |
| 4/23/2018 15:31 | 0.3 | 0.6 | 6.1 | 45.9 | 37.2 | 79.2 | 3.5375 | 2.4 |
| 4/23/2018 15:32 | 0.3 | 0.6 | 4.7 | 46.2 | 37.1 | 79.2 | 3.5722 | 2.3 |
| 4/23/2018 15:33 | 0.3 | 0.4 | 4.4 | 42.5 | 35.2 | 74.1 | 3.3173 | 2.3 |
| 4/23/2018 15:34 | 0.3 | 0.6 | 5   | 42.4 | 34.5 | 73.4 | 3.3165 | 2.3 |
| 4/23/2018 15:35 | 0.4 | 0.8 | 4.8 | 41.4 | 33.8 | 71.7 | 3.2673 | 2.3 |
| 4/23/2018 15:36 | 0.3 | 1.3 | 5.5 | 42.8 | 34.4 | 73.6 | 3.3703 | 2.1 |
| 4/23/2018 15:37 | 0.3 | 1.2 | 5.6 | 41.1 | 34.2 | 71.6 | 3.3543 | 2.1 |
| 4/23/2018 15:38 | 0.3 | 0.4 | 4.7 | 36.6 | 31.4 | 66.1 | 3.0202 | 2   |
| 4/23/2018 15:39 | 0.4 | 1.1 | 4.6 | 35.3 | 29.1 | 57.7 | 2.8555 | 2   |
| 4/23/2018 15:40 | 0.5 | 1   | 4.6 | 34.3 | 29.1 | 57.4 | 2.852  | 1.9 |
| 4/23/2018 15:41 | 0.5 | 0.6 | 3.7 | 34.4 | 28.9 | 59.8 | 2.9078 | 2   |
| 4/23/2018 15:42 | 0.4 | 0.6 | 5.4 | 32.6 | 28.1 | 60   | 2.743  | 2   |
| 4/23/2018 15:43 | 0.4 | 1.3 | 5   | 31.2 | 26.7 | 54.6 | 2.588  | 2   |
| 4/23/2018 15:44 | 0.6 | 1.3 | 4.7 | 30.8 | 26.1 | 52.4 | 2.5642 | 2   |
| 4/23/2018 15:45 | 0.5 | 1.1 | 4.6 | 32.1 | 27   | 55.7 | 2.7568 | 2   |
| 4/23/2018 15:46 | 0.5 | 1.4 | 3.3 | 32.2 | 27.3 | 58   | 2.796  | 2   |
| 4/23/2018 15:47 | 0.3 | 0.6 | 5   | 34   | 27.5 | 58   | 2.8335 | 2   |
| 4/23/2018 15:48 | 0.3 | 1   | 3.7 | 36.1 | 29.7 | 58.7 | 3.0765 | 2.1 |
| 4/23/2018 15:49 | 0.2 | 0.6 | 4.6 | 35.8 | 29.5 | 59.5 | 3.0527 | 2.1 |
| 4/23/2018 15:50 | 0.2 | 0.6 | 4   | 35   | 29   | 60.4 | 3.0212 | 2.2 |
| 4/23/2018 15:51 | 0.2 | 0.3 | 3.7 | 34.7 | 28.6 | 61.1 | 3.034  | 2.2 |
| 4/23/2018 15:52 | 0.2 | 1   | 4.7 | 34.8 | 28.4 | 61.7 | 2.9948 | 2.2 |
| 4/23/2018 15:53 | 0.2 | 0.1 | 4.3 | 34.2 | 28.1 | 62.3 | 3.0088 | 2.2 |
| 4/23/2018 15:54 | 0.2 | 0.6 | 4.5 | 33.3 | 27.8 | 62.8 | 2.9462 | 2.2 |
| 4/23/2018 15:55 | 0.2 | 0.6 | 4.1 | 32.7 | 27.1 | 63   | 2.8767 | 2.2 |
| 4/23/2018 15:56 | 0.3 | 0.6 | 2.9 | 30.5 | 25.7 | 59.2 | 2.6938 | 2.2 |
| 4/23/2018 15:57 | 0.3 | 0.4 | 4.1 | 32.2 | 26.2 | 57.7 | 2.8187 | 2.2 |
| 4/23/2018 15:58 | 0.3 | 1.1 | 4   | 30.3 | 25.8 | 56.4 | 2.7247 | 2.2 |
| 4/23/2018 15:59 | 0.3 | 0.9 | 5.3 | 29.1 | 24.5 | 52.1 | 2.5788 | 2.1 |
| 4/23/2018 16:00 | 0.4 | 0.7 | 4.9 | 26.9 | 23.2 | 50.6 | 2.3947 | 2.1 |
| 4/23/2018 16:01 | 0.5 | 1.5 | 4.6 | 26.5 | 22.3 | 50   | 2.306  | 2.1 |
| 4/23/2018 16:02 | 0.6 | 1.6 | 3.5 | 25.9 | 21.7 | 49.2 | 2.2562 | 2.1 |

|                 |      |      |      |      |      |      |        |     |
|-----------------|------|------|------|------|------|------|--------|-----|
| 4/23/2018 16:03 | 0.7  | 1.4  | 3.7  | 26   | 22.1 | 48.7 | 2.2793 | 2.1 |
| 4/23/2018 16:04 | 0.7  | 1.7  | 4.4  | 24.9 | 20.5 | 47.4 | 2.1025 | 2.1 |
| 4/23/2018 16:05 | 0.8  | 1.6  | 3.5  | 25.9 | 20.7 | 46   | 2.1522 | 2.1 |
| 4/23/2018 16:06 | 0.8  | 1.1  | 4.2  | 28.1 | 22.7 | 45.5 | 2.463  | 2.2 |
| 4/23/2018 16:07 | 0.6  | 0.3  | 6.3  | 29.2 | 23.7 | 45.5 | 2.5945 | 2.2 |
| 4/23/2018 16:08 | 0.4  | 1.1  | 3.2  | 28.1 | 23.4 | 45.6 | 2.5213 | 2.2 |
| 4/23/2018 16:09 | 0.3  | 0.4  | 2.8  | 27.6 | 22.8 | 45.9 | 2.4935 | 2.3 |
| 4/23/2018 16:10 | 0.3  | 0.5  | 5.3  | 27.6 | 22.6 | 46.4 | 2.4613 | 2.3 |
| 4/23/2018 16:11 | 0.3  | 0.8  | 4.3  | 28   | 22.6 | 46.8 | 2.5092 | 2.3 |
| 4/23/2018 16:12 | 0.3  | 1    | 3.4  | 26.9 | 22.2 | 47.6 | 2.4202 | 2.3 |
| 4/23/2018 16:13 | 0.4  | 1.1  | 4.5  | 24.1 | 20.4 | 41.8 | 2.1108 | 2.3 |
| 4/23/2018 16:14 | 0.6  | 1.1  | 3.6  | 21.9 | 18.7 | 32   | 1.7573 | 2.3 |
| 4/23/2018 16:15 | 0.7  | 1    | 3.6  | 21.8 | 18.6 | 32.5 | 1.8018 | 2.2 |
| 4/23/2018 16:16 | 0.9  | 1.2  | 5    | 19.3 | 17.6 | 26   | 1.5123 | 2.1 |
| 4/23/2018 16:17 | 1    | 1.5  | 3.8  | 19.5 | 17.1 | 22.7 | 1.4433 | 2   |
| 4/23/2018 16:18 | 1.1  | 1.5  | 3.9  | 20   | 16.8 | 22.9 | 1.4408 | 2.1 |
| 4/23/2018 16:19 | 1.1  | 1.5  | 2.7  | 19.8 | 17   | 23.2 | 1.5042 | 2.2 |
| 4/23/2018 16:20 | 1.2  | 2.2  | 4.9  | 19.5 | 16.9 | 23.2 | 1.3655 | 2.2 |
| 4/23/2018 16:21 | 2.4  | 7    | 7.5  | 20.1 | 16.9 | 22.4 | 0.9529 | 2.1 |
| 4/23/2018 16:22 | 4.3  | 9.3  | 5.7  | 21.5 | 17.1 | 15   | 0.6849 | 1.9 |
| 4/23/2018 16:23 | 6.9  | 13.1 | 8.6  | 23.9 | 15   | 6    | 0.4852 | 1.8 |
| 4/23/2018 16:24 | 9    | 13.7 | 9.3  | 25.5 | 12   | 3.7  | 0.4112 | 1.7 |
| 4/23/2018 16:25 | 10.9 | 14.7 | 10.1 | 27   | 10.6 | 2.8  | 0.3843 | 1.6 |
| 4/23/2018 16:26 | 12.3 | 16.8 | 10.6 | 27.8 | 9.1  | 2.5  | 0.3494 | 1.6 |
| 4/23/2018 16:27 | 12.9 | 15.5 | 9.6  | 28.6 | 8.2  | 2.4  | 0.338  | 1.7 |
| 4/23/2018 16:28 | 12.1 | 9.9  | 10.9 | 29.2 | 7.7  | 2.4  | 0.3252 | 1.8 |
| 4/23/2018 16:29 |      |      |      |      | 7.5  | 2.3  | 0.3122 | 1.8 |
| 4/23/2018 16:30 |      |      |      |      | 8    | 2.3  | 0.3096 | 1.9 |
| 4/23/2018 16:31 |      |      |      |      | 8.7  | 2.2  | 0.3254 | 2   |
| 4/23/2018 16:32 |      |      |      |      | 9.5  | 2.3  | 0.3608 | 2   |
| 4/23/2018 16:33 |      |      |      |      | 10.4 | 2.3  | 0.3446 | 2.1 |
| 4/23/2018 16:34 |      |      |      |      | 11.5 | 2.3  | 0.4017 | 2.1 |
| 4/23/2018 16:35 |      |      |      |      | 10.6 | 2.4  | 0.3866 | 2.1 |
| 4/23/2018 16:36 |      |      |      |      | 9.4  | 2.4  | 0.3531 | 2.1 |
| 4/23/2018 16:37 |      |      |      |      | 8.3  | 2.4  | 0.3237 | 2   |
| 4/23/2018 16:38 |      |      |      |      | 7.3  | 2.3  | 0.29   | 2   |
| 4/23/2018 16:39 |      |      |      |      | 6.6  | 2.3  | 0.2781 | 2   |
| 4/23/2018 16:40 |      |      |      |      | 6.1  | 2.1  | 0.2566 | 2   |
| 4/23/2018 16:41 |      |      |      |      | 5.9  | 2    | 0.2558 | 2   |
| 4/23/2018 16:42 |      |      |      |      | 5.8  | 1.8  | 0.2422 | 2   |
| 4/23/2018 16:43 |      |      |      |      | 5.7  | 1.6  | 0.2481 | 2   |
| 4/23/2018 16:44 |      |      |      |      | 5.7  | 1.4  | 0.2539 | 2   |
| 4/23/2018 16:45 |      |      |      |      | 6.1  | 1.3  | 0.2489 | 2   |
| 4/23/2018 16:46 |      |      |      |      | 6    | 1.3  | 0.2428 | 2.1 |
| 4/23/2018 16:47 |      |      |      |      | 5.5  | 1.2  | 0.219  | 2.2 |
| 4/23/2018 16:48 |      |      |      |      | 5.6  | 1.2  | 0.2468 | 2.2 |
| 4/23/2018 16:49 |      |      |      |      | 6.1  | 1.2  | 0.259  | 2.2 |

|                 |     |     |        |     |
|-----------------|-----|-----|--------|-----|
| 4/23/2018 16:50 | 6.5 | 1.2 | 0.2771 | 2.3 |
| 4/23/2018 16:51 | 7.6 | 1.3 | 0.3718 | 2.3 |
| 4/23/2018 16:52 | 8.1 | 1.5 | 0.3864 | 2.5 |
| 4/23/2018 16:53 | 7.9 | 1.6 | 0.3774 | 2.6 |
| 4/23/2018 16:54 | 8.1 | 1.8 | 0.3733 | 2.6 |
| 4/23/2018 16:55 | 8   | 1.9 | 0.378  | 2.6 |
| 4/23/2018 16:56 | 8.3 | 2   | 0.3646 | 2.6 |
| 4/23/2018 16:57 | 9   | 2.1 | 0.3994 | 2.6 |
| 4/23/2018 16:58 | 8.8 | 2.2 | 0.3979 | 2.6 |
| 4/23/2018 16:59 | 8.9 | 2.3 | 0.4049 | 2.7 |
| 4/23/2018 17:00 | 8.7 | 2.2 | 0.3995 | 2.7 |
| 4/23/2018 17:01 | 8.4 | 2.2 | 0.3833 | 2.7 |
| 4/23/2018 17:02 | 8.2 | 2.2 | 0.3933 | 2.7 |
| 4/23/2018 17:03 | 8.1 | 2.2 | 0.382  | 2.7 |
| 4/23/2018 17:04 | 8   | 2.3 | 0.3831 | 2.8 |
| 4/23/2018 17:05 | 8   | 2.3 | 0.3695 | 2.7 |
| 4/23/2018 17:06 | 8   | 2.3 | 0.3959 | 2.1 |
| 4/23/2018 17:07 | 7.5 | 2.4 | 0.3765 | 2.1 |
| 4/23/2018 17:08 | 7.2 | 2.4 | 0.3753 | 2.5 |
| 4/23/2018 17:09 | 7.5 | 2.6 | 0.4195 | 2.7 |
| 4/23/2018 17:10 | 7.5 | 2.7 | 0.414  | 2.8 |
| 4/23/2018 17:11 | 7.5 | 2.8 | 0.4189 | 2.8 |
| 4/23/2018 17:12 | 7.4 | 2.9 | 0.4191 | 2.8 |
| 4/23/2018 17:13 | 7.5 | 3.1 | 0.4665 | 2.9 |
| 4/23/2018 17:14 | 7.4 | 3.3 | 0.4178 | 2.9 |
| 4/23/2018 17:15 | 7.2 | 3.4 | 0.4134 | 2.7 |
| 4/23/2018 17:16 | 7   | 3.4 | 0.4067 | 2.6 |
| 4/23/2018 17:17 | 7.1 | 3.5 | 0.4184 | 2.7 |
| 4/23/2018 17:18 | 7   | 3.5 | 0.3928 | 2.7 |
| 4/23/2018 17:19 | 6.9 | 3.4 | 0.3831 | 2.4 |
| 4/23/2018 17:20 | 7.1 | 3.4 | 0.4098 | 2.4 |
| 4/23/2018 17:21 | 7   | 3.4 | 0.3685 | 2.4 |
| 4/23/2018 17:22 | 7   | 3.3 | 0.3812 | 2.3 |
| 4/23/2018 17:23 | 6.5 | 3.2 | 0.3676 | 2.2 |
| 4/23/2018 17:24 | 6.2 | 3.2 | 0.3627 | 2.2 |
| 4/23/2018 17:25 | 6.1 | 3.1 | 0.3471 | 2.1 |
| 4/23/2018 17:26 | 6   | 3.1 | 0.3519 | 2   |
| 4/23/2018 17:27 | 6   | 3.1 | 0.3453 | 2   |
| 4/23/2018 17:28 | 5.9 | 3   | 0.3271 | 2.1 |
| 4/23/2018 17:29 | 5.8 | 3   | 0.328  | 2.2 |
| 4/23/2018 17:30 | 5.7 | 2.9 | 0.311  | 2.2 |
| 4/23/2018 17:31 | 5.7 | 2.9 | 0.3278 | 2.3 |
| 4/23/2018 17:32 | 5.6 | 2.8 | 0.3129 | 2.3 |
| 4/23/2018 17:33 | 5.6 | 2.8 | 0.3098 | 2.2 |
| 4/23/2018 17:34 | 5.5 | 2.8 | 0.3018 | 2.3 |
| 4/23/2018 17:35 | 6.2 | 2.8 | 0.3566 | 2.3 |
| 4/23/2018 17:36 | 6.9 | 2.8 | 0.378  | 2.3 |

|                 |     |     |        |     |
|-----------------|-----|-----|--------|-----|
| 4/23/2018 17:37 | 6.7 | 2.7 | 0.3464 | 2.2 |
| 4/23/2018 17:38 | 6.5 | 2.7 | 0.3436 | 2.2 |
| 4/23/2018 17:39 | 6.5 | 2.7 | 0.3363 | 2.1 |
| 4/23/2018 17:40 | 6.5 | 2.7 | 0.3575 | 2.1 |
| 4/23/2018 17:41 | 6.5 | 2.7 | 0.3254 | 2   |
| 4/23/2018 17:42 | 6.2 | 2.7 | 0.3275 | 2.1 |
| 4/23/2018 17:43 | 6   | 2.7 | 0.311  | 2.2 |
| 4/23/2018 17:44 | 5.5 | 2.6 | 0.2706 | 2.1 |
| 4/23/2018 17:45 | 5.3 | 2.6 | 0.2845 | 2.2 |
| 4/23/2018 17:46 | 5.3 | 2.5 | 0.2571 | 2.2 |
| 4/23/2018 17:47 | 5.1 | 2.5 | 0.2702 | 2.2 |
| 4/23/2018 17:48 | 5   | 2.5 | 0.2593 | 2.2 |
| 4/23/2018 17:49 | 5   | 2.4 | 0.2514 | 2.3 |
| 4/23/2018 17:50 | 4.9 | 2.3 | 0.2455 | 2.4 |
| 4/23/2018 17:51 | 4.9 | 2.3 | 0.2554 | 2.5 |
| 4/23/2018 17:52 | 4.9 | 2.3 | 0.2457 | 2.5 |
| 4/23/2018 17:53 | 5.3 | 2.3 | 0.2842 | 2.5 |
| 4/23/2018 17:54 | 6.1 | 2.3 | 0.3262 | 2.6 |
| 4/23/2018 17:55 | 5.8 | 2.4 | 0.2861 | 2.6 |
| 4/23/2018 17:56 | 5.9 | 2.4 | 0.3025 | 2.7 |
| 4/23/2018 17:57 | 6.1 | 2.4 | 0.3098 | 2.7 |
| 4/23/2018 17:58 | 6.1 | 2.5 | 0.3145 | 2.8 |
| 4/23/2018 17:59 | 6.2 | 2.6 | 0.3097 | 2.9 |
| 4/23/2018 18:00 | 6.2 | 2.6 | 0.3065 | 2.9 |
| 4/23/2018 18:01 | 6.1 | 2.7 | 0.3113 | 2.9 |
| 4/23/2018 18:02 | 6   | 2.7 | 0.266  | 2.9 |
| 4/23/2018 18:03 | 5.9 | 2.6 | 0.2626 | 3   |
| 4/23/2018 18:04 | 5.8 | 2.6 | 0.2473 | 3   |
| 4/23/2018 18:05 | 5.7 | 2.6 | 0.2503 | 2.9 |
| 4/23/2018 18:06 | 5.6 | 2.5 | 0.2412 | 2.9 |
| 4/23/2018 18:07 | 5.8 | 2.5 | 0.2301 | 2.9 |
| 4/23/2018 18:08 | 5.8 | 2.4 | 0.2413 | 2.9 |
| 4/23/2018 18:09 | 5.8 | 2.3 | 0.2299 | 2.9 |
| 4/23/2018 18:10 | 5.8 | 2.2 | 0.2333 | 2.8 |
| 4/23/2018 18:11 | 5.9 | 2.2 | 0.2096 | 2.6 |
| 4/23/2018 18:12 | 5.9 | 2.3 | 0.2726 | 2.5 |
| 4/23/2018 18:13 | 6.1 | 2.3 | 0.2736 | 2.5 |
| 4/23/2018 18:14 | 6.1 | 2.3 | 0.2744 | 2.5 |
| 4/23/2018 18:15 | 6.1 | 2.4 | 0.2887 | 2.5 |
| 4/23/2018 18:16 | 6.1 | 2.5 | 0.2892 | 2.6 |
| 4/23/2018 18:17 | 6.1 | 2.5 | 0.287  | 2.6 |
| 4/23/2018 18:18 | 6   | 2.6 | 0.276  | 2.7 |
| 4/23/2018 18:19 | 6   | 2.7 | 0.2926 | 2.7 |
| 4/23/2018 18:20 | 6   | 2.7 | 0.2874 | 2.8 |
| 4/23/2018 18:21 | 6   | 2.7 | 0.271  | 2.8 |
| 4/23/2018 18:22 | 6   | 2.7 | 0.2274 | 2.8 |
| 4/23/2018 18:23 | 6   | 2.6 | 0.2322 | 2.8 |

|                 |     |     |        |     |
|-----------------|-----|-----|--------|-----|
| 4/23/2018 18:24 | 5.7 | 2.5 | 0.2313 | 2.8 |
| 4/23/2018 18:25 | 5.5 | 2.5 | 0.2214 | 2.9 |
| 4/23/2018 18:26 | 5.4 | 2.4 | 0.2267 | 2.8 |
| 4/23/2018 18:27 | 5.4 | 2.3 | 0.2029 | 2.7 |
| 4/23/2018 18:28 | 5.4 | 2.2 | 0.2403 | 2.8 |
| 4/23/2018 18:29 | 5.3 | 2.1 | 0.1997 | 2.7 |
| 4/23/2018 18:30 | 5.3 | 2.2 | 0.2631 | 2.8 |
| 4/23/2018 18:31 | 5.5 | 2.2 | 0.2664 | 2.8 |
| 4/23/2018 18:32 | 5.4 | 2.3 | 0.263  | 2.7 |
| 4/23/2018 18:33 | 5.4 | 2.4 | 0.2675 | 2.8 |
| 4/23/2018 18:34 | 5.4 | 2.4 | 0.2571 | 2.7 |
| 4/23/2018 18:35 | 5.3 | 2.5 | 0.2773 | 2.5 |
| 4/23/2018 18:36 | 5.3 | 2.6 | 0.2681 | 2.5 |
| 4/23/2018 18:37 | 5.2 | 2.7 | 0.2548 | 2.5 |
| 4/23/2018 18:38 | 5.2 | 2.8 | 0.2673 | 2.6 |
| 4/23/2018 18:39 | 5.1 | 2.7 | 0.2459 | 2.6 |
| 4/23/2018 18:40 | 4.8 | 2.6 | 0.237  | 2.6 |
| 4/23/2018 18:41 | 4.7 | 2.6 | 0.2107 | 2.6 |
| 4/23/2018 18:42 | 4.7 | 2.5 | 0.2159 | 2.6 |
| 4/23/2018 18:43 | 4.6 | 2.3 | 0.1887 | 2.6 |
| 4/23/2018 18:44 | 4.5 | 2.2 | 0.2077 | 2.6 |
| 4/23/2018 18:45 | 4.5 | 2.1 | 0.2072 | 2.5 |
| 4/23/2018 18:46 | 4.5 | 2.1 | 0.2055 | 2.5 |
| 4/23/2018 18:47 | 4.8 | 2   | 0.2438 | 2.5 |
| 4/23/2018 18:48 | 4.9 | 2.1 | 0.235  | 2.5 |
| 4/23/2018 18:49 | 5   | 2.2 | 0.2574 | 2.4 |
| 4/23/2018 18:50 | 5   | 2.3 | 0.2381 | 2.4 |
| 4/23/2018 18:51 | 4.9 | 2.4 | 0.2533 | 2.4 |
| 4/23/2018 18:52 | 4.8 | 2.5 | 0.2448 | 2.5 |
| 4/23/2018 18:53 | 4.8 | 2.5 | 0.2455 | 2.4 |
| 4/23/2018 18:54 | 4.8 | 2.6 | 0.2475 | 2.4 |
| 4/23/2018 18:55 | 4.8 | 2.7 | 0.2349 | 2.4 |
| 4/23/2018 18:56 | 4.7 | 2.6 | 0.2346 | 2.5 |
| 4/23/2018 18:57 | 4.4 | 2.6 | 0.2127 | 2.5 |
| 4/23/2018 18:58 | 4.2 | 2.5 | 0.2116 | 2.5 |
| 4/23/2018 18:59 | 4.2 | 2.5 | 0.2033 | 2.4 |
| 4/23/2018 19:00 | 4.1 | 2.3 | 0.187  | 2.5 |
| 4/23/2018 19:01 | 4   | 2.2 | 0.1966 | 2.5 |
| 4/23/2018 19:02 | 4.1 | 2.1 | 0.1887 | 2.5 |
| 4/23/2018 19:03 | 4   | 2   | 0.2026 | 2.6 |
| 4/23/2018 19:04 | 4.3 | 2   | 0.2265 | 2.6 |
| 4/23/2018 19:05 | 4.5 | 2   | 0.2294 | 2.6 |
| 4/23/2018 19:06 | 4.5 | 2.1 | 0.2267 | 2.7 |
| 4/23/2018 19:07 | 4.6 | 2.1 | 0.2355 | 2.6 |
| 4/23/2018 19:08 | 4.7 | 2.3 | 0.2449 | 2.6 |
| 4/23/2018 19:09 | 4.6 | 2.4 | 0.2399 | 2.4 |
| 4/23/2018 19:10 | 4.5 | 2.5 | 0.2365 | 2.3 |

|                 |     |     |        |     |
|-----------------|-----|-----|--------|-----|
| 4/23/2018 19:11 | 4.4 | 2.6 | 0.2281 | 2.3 |
| 4/23/2018 19:12 | 4.5 | 2.6 | 0.231  | 2.3 |
| 4/23/2018 19:13 | 4.4 | 2.6 | 0.2284 | 2.3 |
| 4/23/2018 19:14 | 4.3 | 2.6 | 0.2135 | 2.2 |
| 4/23/2018 19:15 | 4.2 | 2.6 | 0.2196 | 2.1 |
| 4/23/2018 19:16 | 4   | 2.5 | 0.1918 | 2   |
| 4/23/2018 19:17 | 4   | 2.4 | 0.2004 | 2   |
| 4/23/2018 19:18 | 3.9 | 2.3 | 0.1785 | 2   |
| 4/23/2018 19:19 | 3.8 | 2.2 | 0.1778 | 2   |
| 4/23/2018 19:20 | 3.8 | 2.1 | 0.1877 | 2   |
| 4/23/2018 19:21 | 4.1 | 2   | 0.2064 | 2   |
| 4/23/2018 19:22 | 4.4 | 2   | 0.2308 | 2.1 |
| 4/23/2018 19:23 | 4.3 | 2   | 0.2121 | 2.1 |
| 4/23/2018 19:24 | 4.3 | 2.1 | 0.2317 | 2   |
| 4/23/2018 19:25 | 4.2 | 2.2 | 0.2306 | 2.1 |
| 4/23/2018 19:26 | 4   | 2.3 | 0.2137 | 2.1 |
| 4/23/2018 19:27 | 3.9 | 2.4 | 0.2254 | 2.1 |
| 4/23/2018 19:28 | 4   | 2.5 | 0.2173 | 2.1 |
| 4/23/2018 19:29 | 3.9 | 2.6 | 0.222  | 2.1 |
| 4/23/2018 19:30 | 3.9 | 2.6 | 0.221  | 2.1 |
| 4/23/2018 19:31 | 3.9 | 2.6 | 0.2013 | 2   |
| 4/23/2018 19:32 | 3.7 | 2.6 | 0.2102 | 1.9 |
| 4/23/2018 19:33 | 3.6 | 2.5 | 0.1886 | 1.9 |
| 4/23/2018 19:34 | 3.6 | 2.4 | 0.196  | 2   |
| 4/23/2018 19:35 | 3.5 | 2.3 | 0.171  | 2   |
| 4/23/2018 19:36 | 3.5 | 2.2 | 0.1862 | 2.2 |
| 4/23/2018 19:37 | 3.6 | 2.1 | 0.1984 | 2.2 |
| 4/23/2018 19:38 | 3.8 | 2.1 | 0.2209 | 2.3 |
| 4/23/2018 19:39 | 3.8 | 2.1 | 0.2216 | 2.3 |
| 4/23/2018 19:40 | 3.8 | 2.1 | 0.2113 | 2.4 |
| 4/23/2018 19:41 | 3.8 | 2.2 | 0.2202 | 2.5 |
| 4/23/2018 19:42 | 3.9 | 2.2 | 0.2195 | 2.5 |
| 4/23/2018 19:43 | 3.8 | 2.3 | 0.2152 | 2.5 |
| 4/23/2018 19:44 | 3.8 | 2.4 | 0.2182 | 2.4 |
| 4/23/2018 19:45 | 3.8 | 2.5 | 0.2054 | 2.5 |
| 4/23/2018 19:46 | 3.8 | 2.5 | 0.2172 | 2.6 |
| 4/23/2018 19:47 | 3.8 | 2.5 | 0.2091 | 2.6 |
| 4/23/2018 19:48 | 3.8 | 2.5 | 0.2045 | 2.6 |
| 4/23/2018 19:49 | 3.8 | 2.5 | 0.2089 | 2.6 |
| 4/23/2018 19:50 | 3.7 | 2.5 | 0.2013 | 2.5 |
| 4/23/2018 19:51 | 3.7 | 2.4 | 0.1998 | 2.6 |
| 4/23/2018 19:52 | 3.6 | 2.3 | 0.1874 | 2.8 |
| 4/23/2018 19:53 | 3.6 | 2.3 | 0.1889 | 2.8 |
| 4/23/2018 19:54 | 3.6 | 2.2 | 0.1879 | 2.8 |
| 4/23/2018 19:55 | 3.7 | 2.1 | 0.2002 | 2.8 |
| 4/23/2018 19:56 | 3.8 | 2.1 | 0.2191 | 2.9 |
| 4/23/2018 19:57 | 3.8 | 2.1 | 0.2049 | 3   |



|                 |     |     |        |     |
|-----------------|-----|-----|--------|-----|
| 4/23/2018 19:58 | 3.8 | 2.2 | 0.204  | 3   |
| 4/23/2018 19:59 | 3.8 | 2.2 | 0.2158 | 3.1 |
| 4/23/2018 20:00 | 3.8 | 2.3 | 0.1986 | 3.1 |
| 4/23/2018 20:01 | 3.8 | 2.4 | 0.2163 | 3.1 |
| 4/23/2018 20:02 | 3.7 | 2.5 | 0.1993 | 3.2 |
| 4/23/2018 20:03 | 3.7 | 2.6 | 0.2108 | 3.1 |
| 4/23/2018 20:04 | 3.7 | 2.6 | 0.2038 | 3.2 |
| 4/23/2018 20:05 | 3.7 | 2.6 | 0.2094 | 2.9 |
| 4/23/2018 20:06 | 3.7 | 2.6 | 0.2043 | 2.8 |
| 4/23/2018 20:07 | 3.7 | 2.6 | 0.1928 | 3   |
| 4/23/2018 20:08 | 3.7 | 2.5 | 0.1965 | 3.1 |
| 4/23/2018 20:09 | 3.7 | 2.4 | 0.1831 | 3.2 |
| 4/23/2018 20:10 | 3.7 | 2.3 | 0.1854 | 3.2 |
| 4/23/2018 20:11 | 3.7 | 2.3 | 0.1996 | 3.2 |
| 4/23/2018 20:12 | 3.7 | 2.3 | 0.2054 | 3.2 |
| 4/23/2018 20:13 | 3.8 | 2.3 | 0.2132 | 3.2 |
| 4/23/2018 20:14 | 3.7 | 2.3 | 0.1963 | 3.2 |
| 4/23/2018 20:15 | 3.7 | 2.3 | 0.205  | 3.2 |
| 4/23/2018 20:16 | 3.7 | 2.4 | 0.1983 | 3.1 |
| 4/23/2018 20:17 | 3.7 | 2.5 | 0.2044 | 3.2 |
| 4/23/2018 20:18 | 3.7 | 2.5 | 0.2053 | 3.1 |
| 4/23/2018 20:19 | 3.7 | 2.6 | 0.2043 | 3.2 |
| 4/23/2018 20:20 | 3.7 | 2.6 | 0.2153 | 3.3 |
| 4/23/2018 20:21 | 3.7 | 2.6 | 0.191  | 3.3 |
| 4/23/2018 20:22 | 3.7 | 2.7 | 0.2091 | 3.3 |
| 4/23/2018 20:23 | 3.7 | 2.7 | 0.1999 | 3.3 |
| 4/23/2018 20:24 | 3.7 | 2.6 | 0.1892 | 3.3 |
| 4/23/2018 20:25 | 3.7 | 2.6 | 0.196  | 3.3 |
| 4/23/2018 20:26 | 3.7 | 2.5 | 0.185  | 3.3 |
| 4/23/2018 20:27 | 3.5 | 2.5 | 0.2032 | 3.3 |
| 4/23/2018 20:28 | 3.5 | 2.4 | 0.2145 | 3.3 |
| 4/23/2018 20:29 | 3.5 | 2.4 | 0.1938 | 3.3 |
| 4/23/2018 20:30 | 3.5 | 2.4 | 0.2018 | 3.3 |
| 4/23/2018 20:31 | 3.5 | 2.4 | 0.1999 | 3.3 |
| 4/23/2018 20:32 | 3.5 | 2.4 | 0.208  | 3.2 |
| 4/23/2018 20:33 | 3.5 | 2.5 | 0.2037 | 3.3 |
| 4/23/2018 20:34 | 3.5 | 2.5 | 0.1989 | 3.4 |
| 4/23/2018 20:35 | 3.5 | 2.6 | 0.218  | 3.4 |
| 4/23/2018 20:36 | 3.5 | 2.6 | 0.2021 | 3.4 |
| 4/23/2018 20:37 | 3.5 | 2.6 | 0.1997 | 3.4 |
| 4/23/2018 20:38 | 3.6 | 2.6 | 0.204  | 3.3 |
| 4/23/2018 20:39 | 3.6 | 2.6 | 0.1861 | 3.3 |
| 4/23/2018 20:40 | 3.7 | 2.5 | 0.1927 | 3.4 |
| 4/23/2018 20:41 | 3.7 | 2.5 | 0.1807 | 3.4 |
| 4/23/2018 20:42 | 3.6 | 2.4 | 0.1917 | 3.4 |
| 4/23/2018 20:43 | 3.5 | 2.4 | 0.2054 | 3.4 |
| 4/23/2018 20:44 | 3.6 | 2.4 | 0.1922 | 3.4 |

|                 |     |     |        |     |
|-----------------|-----|-----|--------|-----|
| 4/23/2018 20:45 | 3.6 | 2.4 | 0.2067 | 3.4 |
| 4/23/2018 20:46 | 3.6 | 2.4 | 0.1935 | 3.5 |
| 4/23/2018 20:47 | 3.6 | 2.5 | 0.2115 | 3.5 |
| 4/23/2018 20:48 | 3.6 | 2.5 | 0.2043 | 3.4 |
| 4/23/2018 20:49 | 3.7 | 2.6 | 0.1898 | 3.5 |
| 4/23/2018 20:50 | 3.7 | 2.7 | 0.2014 | 3.6 |
| 4/23/2018 20:51 | 3.7 | 2.6 | 0.1828 | 3.6 |
| 4/23/2018 20:52 | 3.6 | 2.6 | 0.2062 | 3.6 |
| 4/23/2018 20:53 | 3.7 | 2.7 | 0.1941 | 3.6 |
| 4/23/2018 20:54 | 3.7 | 2.6 | 0.1881 | 3.6 |
| 4/23/2018 20:55 | 3.8 | 2.6 | 0.2001 | 3.7 |
| 4/23/2018 20:56 | 3.8 | 2.6 | 0.195  | 3.6 |
| 4/23/2018 20:57 | 3.6 | 2.6 | 0.2065 | 3   |
| 4/23/2018 20:58 | 3.7 | 2.6 | 0.1946 | 2.8 |
| 4/23/2018 20:59 | 3.9 | 2.6 | 0.1944 | 2.9 |
| 4/23/2018 21:00 | 3.9 | 2.6 | 0.2011 | 3   |
| 4/23/2018 21:01 | 3.8 | 2.6 | 0.1868 | 3.3 |
| 4/23/2018 21:02 | 3.8 | 2.6 | 0.2094 | 3.2 |
| 4/23/2018 21:03 | 3.9 | 2.6 | 0.1921 | 3.3 |
| 4/23/2018 21:04 | 3.8 | 2.7 | 0.2063 | 3.4 |
| 4/23/2018 21:05 | 3.9 | 2.6 | 0.1988 | 3.5 |
| 4/23/2018 21:06 | 4.1 | 2.6 | 0.1909 | 3.5 |
| 4/23/2018 21:07 | 3.9 | 2.6 | 0.2016 | 3.6 |
| 4/23/2018 21:08 | 4   | 2.6 | 0.1921 | 3.6 |
| 4/23/2018 21:09 | 4.1 | 2.6 | 0.2015 | 3.5 |
| 4/23/2018 21:10 | 4.2 | 2.6 | 0.1891 | 3.4 |
| 4/23/2018 21:11 | 4.3 | 2.6 | 0.1949 | 3.4 |
| 4/23/2018 21:12 | 3.9 | 2.6 | 0.2047 | 3.5 |
| 4/23/2018 21:13 | 3.9 | 2.6 | 0.1978 | 3.5 |
| 4/23/2018 21:14 | 4.3 | 2.6 | 0.2054 | 3.4 |
| 4/23/2018 21:15 | 4.1 | 2.6 | 0.1881 | 3.3 |
| 4/23/2018 21:16 | 4   | 2.6 | 0.1953 | 3.4 |
| 4/23/2018 21:17 | 4   | 2.6 | 0.2012 | 3.4 |
| 4/23/2018 21:18 | 4   | 2.6 | 0.1926 | 3.5 |
| 4/23/2018 21:19 | 3.9 | 2.7 | 0.2078 | 3.6 |
| 4/23/2018 21:20 | 4.2 | 2.7 | 0.1926 | 3.6 |
| 4/23/2018 21:21 | 4.1 | 2.7 | 0.2009 | 3.6 |
| 4/23/2018 21:22 | 4.2 | 2.7 | 0.2003 | 3.6 |
| 4/23/2018 21:23 | 4.1 | 2.7 | 0.1979 | 3.5 |
| 4/23/2018 21:24 | 4.2 | 2.7 | 0.196  | 3.5 |
| 4/23/2018 21:25 | 4.3 | 2.7 | 0.1881 | 3.5 |
| 4/23/2018 21:26 | 4.2 | 2.7 | 0.1947 | 3.5 |
| 4/23/2018 21:27 | 4.3 | 2.7 | 0.1886 | 3.5 |
| 4/23/2018 21:28 | 4.4 | 2.7 | 0.1906 | 3.4 |
| 4/23/2018 21:29 | 4.2 | 2.7 | 0.2044 | 3.3 |
| 4/23/2018 21:30 | 4.4 | 2.6 | 0.1861 | 3.4 |
| 4/23/2018 21:31 | 4.4 | 2.6 | 0.1958 | 3.4 |

|                 |     |     |        |     |
|-----------------|-----|-----|--------|-----|
| 4/23/2018 21:32 | 4.2 | 2.6 | 0.1912 | 3.4 |
| 4/23/2018 21:33 | 4.2 | 2.6 | 0.1965 | 3.2 |
| 4/23/2018 21:34 | 4.2 | 2.6 | 0.2037 | 3.2 |
| 4/23/2018 21:35 | 4.3 | 2.6 | 0.1915 | 3.3 |
| 4/23/2018 21:36 | 4.5 | 2.6 | 0.2029 | 3.2 |
| 4/23/2018 21:37 | 4.4 | 2.6 | 0.1889 | 3.3 |
| 4/23/2018 21:38 | 4.7 | 2.6 | 0.195  | 3.3 |
| 4/23/2018 21:39 | 4.2 | 2.6 | 0.1944 | 3.3 |
| 4/23/2018 21:40 | 4.5 | 2.6 | 0.1927 | 3.3 |
| 4/23/2018 21:41 | 4.8 | 2.6 | 0.1989 | 3.4 |
| 4/23/2018 21:42 | 5.3 | 2.6 | 0.188  | 3.4 |
| 4/23/2018 21:43 | 5   | 2.5 | 0.2046 | 3.4 |
| 4/23/2018 21:44 | 4.2 | 2.6 | 0.1946 | 3.4 |
| 4/23/2018 21:45 | 4.9 | 2.6 | 0.1953 | 3.5 |
| 4/23/2018 21:46 | 4.8 | 2.6 | 0.1915 | 3.4 |
| 4/23/2018 21:47 | 4.7 | 2.6 | 0.1972 | 3.3 |
| 4/23/2018 21:48 | 4.5 | 2.5 | 0.1949 | 3.3 |
| 4/23/2018 21:49 | 4.6 | 2.6 | 0.1917 | 3.3 |
| 4/23/2018 21:50 | 4.7 | 2.6 | 0.2027 | 3.3 |
| 4/23/2018 21:51 | 4.6 | 2.6 | 0.1925 | 3.3 |
| 4/23/2018 21:52 | 4.7 | 2.6 | 0.1984 | 3.3 |
| 4/23/2018 21:53 | 5.1 | 2.6 | 0.1955 | 3.3 |
| 4/23/2018 21:54 | 5   | 2.6 | 0.1963 | 3.3 |
| 4/23/2018 21:55 | 4.6 | 2.6 | 0.1988 | 3.3 |
| 4/23/2018 21:56 | 5.1 | 2.6 | 0.1887 | 3.2 |
| 4/23/2018 21:57 | 5   | 2.6 | 0.1998 | 3.2 |
| 4/23/2018 21:58 | 4.5 | 2.6 | 0.1765 | 3.2 |
| 4/23/2018 21:59 | 4.9 | 2.7 | 0.1968 | 3.3 |
| 4/23/2018 22:00 | 5.1 | 2.6 | 0.1965 | 3.3 |
| 4/23/2018 22:01 | 4.9 | 2.6 | 0.1903 | 3.3 |
| 4/23/2018 22:02 | 4.8 | 2.7 | 0.2    | 3.4 |
| 4/23/2018 22:03 | 4.7 | 2.7 | 0.1857 | 3.4 |
| 4/23/2018 22:04 | 4.9 | 2.7 | 0.1961 | 3.4 |
| 4/23/2018 22:05 | 4.9 | 2.7 | 0.1902 | 3.4 |
| 4/23/2018 22:06 | 4.9 | 2.7 | 0.1922 | 3.4 |
| 4/23/2018 22:07 | 4.9 | 2.7 | 0.1948 | 3.4 |
| 4/23/2018 22:08 | 4.9 | 2.7 | 0.1927 | 3.4 |
| 4/23/2018 22:09 | 4.8 | 2.7 | 0.1979 | 3.4 |
| 4/23/2018 22:10 | 4.8 | 2.7 | 0.1831 | 3.4 |
| 4/23/2018 22:11 | 5.2 | 2.7 | 0.2011 | 3.4 |
| 4/23/2018 22:12 | 4.8 | 2.7 | 0.1817 | 3.4 |
| 4/23/2018 22:13 | 4.7 | 2.7 | 0.1974 | 3.4 |
| 4/23/2018 22:14 | 5.2 | 2.7 | 0.189  | 3.4 |
| 4/23/2018 22:15 | 5.1 | 2.7 | 0.1837 | 3.4 |
| 4/23/2018 22:16 | 5.1 | 2.7 | 0.1942 | 3.4 |
| 4/23/2018 22:17 | 5   | 2.7 | 0.1828 | 3.3 |
| 4/23/2018 22:18 | 4.8 | 2.7 | 0.1979 | 3.3 |

|                 |     |     |        |     |
|-----------------|-----|-----|--------|-----|
| 4/23/2018 22:19 | 5   | 2.7 | 0.1835 | 3.4 |
| 4/23/2018 22:20 | 5.4 | 2.7 | 0.1902 | 3.4 |
| 4/23/2018 22:21 | 5.2 | 2.6 | 0.1897 | 3.4 |
| 4/23/2018 22:22 | 5.4 | 2.6 | 0.1735 | 3.3 |
| 4/23/2018 22:23 | 5.2 | 2.6 | 0.195  | 3.3 |
| 4/23/2018 22:24 | 4.9 | 2.7 | 0.1843 | 3.3 |
| 4/23/2018 22:25 | 4.9 | 2.7 | 0.1966 | 3.3 |
| 4/23/2018 22:26 | 5.1 | 2.7 | 0.1942 | 3.3 |
| 4/23/2018 22:27 | 5.1 | 2.7 | 0.1967 | 3.3 |
| 4/23/2018 22:28 | 5.1 | 2.7 | 0.1835 | 3.2 |
| 4/23/2018 22:29 | 5.2 | 2.7 | 0.1792 | 3.2 |
| 4/23/2018 22:30 | 5   | 2.7 | 0.1937 | 3.3 |
| 4/23/2018 22:31 | 4.8 | 2.7 | 0.1824 | 3.3 |
| 4/23/2018 22:32 | 5   | 2.7 | 0.1932 | 3.3 |
| 4/23/2018 22:33 | 4.9 | 2.7 | 0.1848 | 3.4 |
| 4/23/2018 22:34 | 5   | 2.7 | 0.1877 | 3.4 |
| 4/23/2018 22:35 | 5.1 | 2.7 | 0.198  | 3.3 |
| 4/23/2018 22:36 | 5   | 2.7 | 0.1889 | 3.3 |
| 4/23/2018 22:37 | 5.3 | 2.7 | 0.1957 | 3.3 |
| 4/23/2018 22:38 | 5.1 | 2.6 | 0.1885 | 3.4 |
| 4/23/2018 22:39 | 5.2 | 2.6 | 0.193  | 3.4 |
| 4/23/2018 22:40 | 5.1 | 2.6 | 0.1839 | 3.5 |
| 4/23/2018 22:41 | 5.1 | 2.6 | 0.1889 | 3.4 |
| 4/23/2018 22:42 | 5.2 | 2.6 | 0.1963 | 3.4 |
| 4/23/2018 22:43 | 5.5 | 2.5 | 0.1707 | 3.4 |
| 4/23/2018 22:44 | 5.3 | 2.5 | 0.1922 | 3.4 |
| 4/23/2018 22:45 | 5   | 2.5 | 0.179  | 3.3 |
| 4/23/2018 22:46 | 5.1 | 2.6 | 0.1923 | 2.9 |
| 4/23/2018 22:47 | 5.1 | 2.6 | 0.1814 | 2.9 |
| 4/23/2018 22:48 | 5.2 | 2.6 | 0.1817 | 2.9 |
| 4/23/2018 22:49 | 5.2 | 2.6 | 0.195  | 3   |
| 4/23/2018 22:50 | 5.3 | 2.6 | 0.179  | 3.2 |
| 4/23/2018 22:51 | 5.3 | 2.6 | 0.192  | 3.1 |
| 4/23/2018 22:52 | 5.3 | 2.7 | 0.1846 | 3.2 |
| 4/23/2018 22:53 | 5.4 | 2.6 | 0.1818 | 3.3 |
| 4/23/2018 22:54 | 5.2 | 2.6 | 0.1868 | 3.4 |
| 4/23/2018 22:55 | 5.3 | 2.6 | 0.1768 | 3.4 |
| 4/23/2018 22:56 | 5.6 | 2.6 | 0.1842 | 3.4 |
| 4/23/2018 22:57 | 5.4 | 2.6 | 0.1772 | 3.5 |
| 4/23/2018 22:58 | 5.2 | 2.6 | 0.1918 | 3.4 |
| 4/23/2018 22:59 | 5   | 2.6 | 0.1841 | 3.4 |
| 4/23/2018 23:00 | 4.9 | 2.6 | 0.1871 | 3.4 |
| 4/23/2018 23:01 | 5.1 | 2.6 | 0.1876 | 3.3 |
| 4/23/2018 23:02 | 5   | 2.6 | 0.185  | 3.3 |
| 4/23/2018 23:03 | 5.2 | 2.6 | 0.1878 | 3.3 |
| 4/23/2018 23:04 | 5.2 | 2.6 | 0.1813 | 3.3 |
| 4/23/2018 23:05 | 5.2 | 2.7 | 0.1873 | 3.3 |

|                 |     |     |        |     |
|-----------------|-----|-----|--------|-----|
| 4/23/2018 23:06 | 5.1 | 2.7 | 0.1838 | 3.3 |
| 4/23/2018 23:07 | 5.1 | 2.7 | 0.1821 | 3.3 |
| 4/23/2018 23:08 | 5   | 2.7 | 0.1887 | 3.3 |
| 4/23/2018 23:09 | 5   | 2.6 | 0.1763 | 3.4 |
| 4/23/2018 23:10 | 5.1 | 2.6 | 0.1886 | 3.3 |
| 4/23/2018 23:11 | 5.2 | 2.6 | 0.1731 | 3.3 |
| 4/23/2018 23:12 | 5   | 2.6 | 0.1887 | 3.3 |
| 4/23/2018 23:13 | 5   | 2.6 | 0.1794 | 3.3 |
| 4/23/2018 23:14 | 5   | 2.6 | 0.1853 | 3.2 |
| 4/23/2018 23:15 | 4.9 | 2.6 | 0.1862 | 3.2 |
| 4/23/2018 23:16 | 5   | 2.6 | 0.1787 | 3.2 |
| 4/23/2018 23:17 | 5   | 2.6 | 0.189  | 3.2 |
| 4/23/2018 23:18 | 5   | 2.6 | 0.1749 | 3.1 |
| 4/23/2018 23:19 | 5   | 2.7 | 0.1853 | 3   |
| 4/23/2018 23:20 | 4.9 | 2.7 | 0.1769 | 3.1 |
| 4/23/2018 23:21 | 4.9 | 2.7 | 0.1777 | 3.1 |
| 4/23/2018 23:22 | 4.9 | 2.7 | 0.1873 | 3.1 |
| 4/23/2018 23:23 | 4.9 | 2.7 | 0.1745 | 3.2 |
| 4/23/2018 23:24 | 4.9 | 2.7 | 0.1834 | 3   |
| 4/23/2018 23:25 | 5   | 2.6 | 0.1694 | 3.1 |
| 4/23/2018 23:26 | 4.9 | 2.6 | 0.1748 | 3.1 |
| 4/23/2018 23:27 | 4.8 | 2.6 | 0.1794 | 3.1 |
| 4/23/2018 23:28 | 4.8 | 2.6 | 0.1836 | 3.1 |
| 4/23/2018 23:29 | 4.8 | 2.6 | 0.187  | 3   |
| 4/23/2018 23:30 | 4.7 | 2.7 | 0.1737 | 3.1 |
| 4/23/2018 23:31 | 4.6 | 2.7 | 0.1865 | 3.2 |
| 4/23/2018 23:32 | 4.6 | 2.7 | 0.1774 | 3.2 |
| 4/23/2018 23:33 | 4.6 | 2.7 | 0.1881 | 3.1 |
| 4/23/2018 23:34 | 4.6 | 2.7 | 0.1771 | 2.7 |
| 4/23/2018 23:35 | 4.7 | 2.7 | 0.179  | 2.2 |
| 4/23/2018 23:36 | 4.6 | 2.7 | 0.1936 | 2.3 |
| 4/23/2018 23:37 | 4.6 | 2.7 | 0.1709 | 2.6 |
| 4/23/2018 23:38 | 4.6 | 2.7 | 0.1917 | 2.7 |
| 4/23/2018 23:39 | 4.6 | 2.7 | 0.1636 | 2.9 |
| 4/23/2018 23:40 | 4.6 | 2.6 | 0.1764 | 3   |
| 4/23/2018 23:41 | 4.6 | 2.6 | 0.1769 | 3   |
| 4/23/2018 23:42 | 4.5 | 2.6 | 0.1754 | 3.1 |
| 4/23/2018 23:43 | 4.6 | 2.5 | 0.1842 | 3.1 |
| 4/23/2018 23:44 | 4.6 | 2.5 | 0.168  | 3.2 |
| 4/23/2018 23:45 | 4.6 | 2.5 | 0.1823 | 3.2 |
| 4/23/2018 23:46 | 4.5 | 2.5 | 0.1695 | 3.2 |
| 4/23/2018 23:47 | 4.5 | 2.5 | 0.1813 | 3.3 |
| 4/23/2018 23:48 | 4.4 | 2.6 | 0.171  | 3.2 |
| 4/23/2018 23:49 | 4.4 | 2.6 | 0.167  | 3.2 |
| 4/23/2018 23:50 | 4.5 | 2.6 | 0.1821 | 3.2 |
| 4/23/2018 23:51 | 4.5 | 2.6 | 0.1647 | 3.1 |
| 4/23/2018 23:52 | 4.5 | 2.6 | 0.1856 | 3   |

|                 |     |     |        |     |
|-----------------|-----|-----|--------|-----|
| 4/23/2018 23:53 | 4.5 | 2.6 | 0.1714 | 3   |
| 4/23/2018 23:54 | 4.4 | 2.6 | 0.1826 | 3   |
| 4/23/2018 23:55 | 4.5 | 2.5 | 0.1775 | 3   |
| 4/23/2018 23:56 | 4.5 | 2.5 | 0.1734 | 3   |
| 4/23/2018 23:57 | 4.5 | 2.5 | 0.1737 | 3   |
| 4/23/2018 23:58 | 4.4 | 2.5 | 0.1628 | 2.9 |
| 4/23/2018 23:59 | 4.4 | 2.5 | 0.1808 | 2.8 |
| 4/24/2018 0:00  | 4.4 | 2.5 | 0.172  | 2.8 |
| 4/24/2018 0:01  | 4.3 | 2.5 | 0.1773 | 2.8 |
| 4/24/2018 0:02  | 4.4 | 2.5 | 0.1791 | 3   |
| 4/24/2018 0:03  | 4.4 | 2.6 | 0.1708 | 3   |
| 4/24/2018 0:04  | 4.5 | 2.6 | 0.1814 | 3.1 |
| 4/24/2018 0:05  | 4.6 | 2.6 | 0.1647 | 3.1 |
| 4/24/2018 0:06  | 4.7 | 2.6 | 0.1803 | 3   |
| 4/24/2018 0:07  | 4.9 | 2.6 | 0.168  | 3   |
| 4/24/2018 0:08  | 4.8 | 2.6 | 0.1755 | 3.1 |
| 4/24/2018 0:09  | 4.7 | 2.6 | 0.1776 | 3.1 |
| 4/24/2018 0:10  | 4.9 | 2.5 | 0.1694 | 3.1 |
| 4/24/2018 0:11  | 5.1 | 2.5 | 0.1767 | 3.1 |
| 4/24/2018 0:12  | 5.1 | 2.5 | 0.1594 | 2.6 |
| 4/24/2018 0:13  | 4.7 | 2.5 | 0.1854 | 2   |
| 4/24/2018 0:14  | 4.8 | 2.5 | 0.1664 | 2.1 |
| 4/24/2018 0:15  | 4.8 | 2.6 | 0.1783 | 2.3 |
| 4/24/2018 0:16  | 4.9 | 2.6 | 0.1726 | 2.6 |
| 4/24/2018 0:17  | 4.8 | 2.6 | 0.1685 | 2.9 |
| 4/24/2018 0:18  | 4.8 | 2.6 | 0.1729 | 2.8 |
| 4/24/2018 0:19  | 4.8 | 2.6 | 0.1628 | 3   |
| 4/24/2018 0:20  | 4.7 | 2.7 | 0.1768 | 3.1 |
| 4/24/2018 0:21  | 4.9 | 2.7 | 0.1669 | 3.2 |
| 4/24/2018 0:22  | 4.9 | 2.6 | 0.1753 | 3.2 |
| 4/24/2018 0:23  | 4.9 | 2.6 | 0.1779 | 3.2 |
| 4/24/2018 0:24  | 4.9 | 2.6 | 0.1596 | 3.2 |
| 4/24/2018 0:25  | 5   | 2.6 | 0.1795 | 3.1 |
| 4/24/2018 0:26  | 4.8 | 2.6 | 0.1651 | 3.1 |
| 4/24/2018 0:27  | 4.9 | 2.6 | 0.1777 | 3.1 |
| 4/24/2018 0:28  | 4.9 | 2.6 | 0.1757 | 3.1 |
| 4/24/2018 0:29  | 4.9 | 2.5 | 0.1632 | 3.1 |
| 4/24/2018 0:30  | 4.9 | 2.5 | 0.1817 | 3.1 |
| 4/24/2018 0:31  | 4.7 | 2.6 | 0.165  | 3.1 |
| 4/24/2018 0:32  | 4.6 | 2.6 | 0.1788 | 3   |
| 4/24/2018 0:33  | 4.6 | 2.6 | 0.1585 | 3   |
| 4/24/2018 0:34  | 4.6 | 2.6 | 0.1767 | 3   |
| 4/24/2018 0:35  | 4.5 | 2.6 | 0.1649 | 3   |
| 4/24/2018 0:36  | 4.6 | 2.5 | 0.1665 | 3.1 |
| 4/24/2018 0:37  | 4.5 | 2.6 | 0.1734 | 3.1 |
| 4/24/2018 0:38  | 4.5 | 2.5 | 0.1591 | 3.1 |
| 4/24/2018 0:39  | 4.5 | 2.5 | 0.1786 | 3.2 |

|                |     |     |        |     |
|----------------|-----|-----|--------|-----|
| 4/24/2018 0:40 | 4.3 | 2.5 | 0.1664 | 3.2 |
| 4/24/2018 0:41 | 4.4 | 2.5 | 0.1772 | 3.1 |
| 4/24/2018 0:42 | 4.4 | 2.5 | 0.1809 | 3.2 |
| 4/24/2018 0:43 | 4.3 | 2.5 | 0.1619 | 3.2 |
| 4/24/2018 0:44 | 4.3 | 2.6 | 0.1696 | 3.3 |
| 4/24/2018 0:45 | 4.3 | 2.6 | 0.158  | 3.3 |
| 4/24/2018 0:46 | 4.3 | 2.6 | 0.1763 | 3.3 |
| 4/24/2018 0:47 | 4.3 | 2.6 | 0.1655 | 3.3 |
| 4/24/2018 0:48 | 4.2 | 2.6 | 0.1655 | 3.3 |
| 4/24/2018 0:49 | 4.2 | 2.6 | 0.1728 | 3.3 |
| 4/24/2018 0:50 | 4.2 | 2.6 | 0.1553 | 3.3 |
| 4/24/2018 0:51 | 4.2 | 2.5 | 0.1749 | 3.3 |
| 4/24/2018 0:52 | 4.1 | 2.5 | 0.1601 | 3.3 |
| 4/24/2018 0:53 | 4.1 | 2.5 | 0.1683 | 3.2 |
| 4/24/2018 0:54 | 4.1 | 2.5 | 0.1609 | 3.1 |
| 4/24/2018 0:55 | 4.1 | 2.5 | 0.1707 | 3.1 |
| 4/24/2018 0:56 | 4   | 2.4 | 0.1735 | 3.1 |
| 4/24/2018 0:57 | 4   | 2.4 | 0.1597 | 3.2 |
| 4/24/2018 0:58 | 4   | 2.4 | 0.1639 | 3.2 |
| 4/24/2018 0:59 | 4   | 2.4 | 0.1618 | 3.2 |
| 4/24/2018 1:00 | 4   | 2.4 | 0.1703 | 3.1 |
| 4/24/2018 1:01 | 4   | 2.4 | 0.1655 | 3.1 |
| 4/24/2018 1:02 | 4   | 2.4 | 0.1668 | 3.1 |
| 4/24/2018 1:03 | 3.9 | 2.4 | 0.1691 | 3.1 |
| 4/24/2018 1:04 | 3.9 | 2.4 | 0.1626 | 3.1 |
| 4/24/2018 1:05 | 4   | 2.4 | 0.1695 | 3.1 |
| 4/24/2018 1:06 | 3.9 | 2.4 | 0.1548 | 3.2 |
| 4/24/2018 1:07 | 3.9 | 2.4 | 0.1661 | 3.2 |
| 4/24/2018 1:08 | 3.9 | 2.5 | 0.1601 | 3   |
| 4/24/2018 1:09 | 3.9 | 2.5 | 0.167  | 2.8 |
| 4/24/2018 1:10 | 3.9 | 2.5 | 0.1678 | 2.8 |
| 4/24/2018 1:11 | 3.9 | 2.5 | 0.1552 | 2.9 |
| 4/24/2018 1:12 | 3.9 | 2.5 | 0.1693 | 2.9 |
| 4/24/2018 1:13 | 3.9 | 2.5 | 0.1583 | 2.9 |
| 4/24/2018 1:14 | 3.9 | 2.5 | 0.1691 | 2.9 |
| 4/24/2018 1:15 | 3.9 | 2.5 | 0.1641 | 3   |
| 4/24/2018 1:16 | 3.9 | 2.5 | 0.1622 | 3   |
| 4/24/2018 1:17 | 3.9 | 2.5 | 0.1776 | 3   |
| 4/24/2018 1:18 | 3.9 | 2.5 | 0.1638 | 3   |
| 4/24/2018 1:19 | 3.8 | 2.5 | 0.1738 | 3   |
| 4/24/2018 1:20 | 3.8 | 2.4 | 0.1572 | 2.9 |
| 4/24/2018 1:21 | 3.8 | 2.4 | 0.1606 | 3   |
| 4/24/2018 1:22 | 3.8 | 2.4 | 0.1631 | 3   |
| 4/24/2018 1:23 | 3.8 | 2.5 | 0.1604 | 3   |
| 4/24/2018 1:24 | 3.8 | 2.5 | 0.1689 | 3.1 |
| 4/24/2018 1:25 | 3.8 | 2.5 | 0.154  | 3.1 |
| 4/24/2018 1:26 | 3.7 | 2.5 | 0.1635 | 3.1 |

|                |     |     |        |     |
|----------------|-----|-----|--------|-----|
| 4/24/2018 1:27 | 3.8 | 2.5 | 0.1468 | 3.1 |
| 4/24/2018 1:28 | 3.7 | 2.5 | 0.171  | 3.1 |
| 4/24/2018 1:29 | 3.7 | 2.5 | 0.1626 | 3.1 |
| 4/24/2018 1:30 | 3.8 | 2.5 | 0.1567 | 3.1 |
| 4/24/2018 1:31 | 3.8 | 2.5 | 0.1653 | 3.1 |
| 4/24/2018 1:32 | 3.7 | 2.5 | 0.1567 | 3.2 |
| 4/24/2018 1:33 | 3.6 | 2.5 | 0.1651 | 3.2 |
| 4/24/2018 1:34 | 3.6 | 2.5 | 0.1563 | 3.2 |
| 4/24/2018 1:35 | 3.6 | 2.5 | 0.1563 | 3.3 |
| 4/24/2018 1:36 | 3.6 | 2.5 | 0.1622 | 3.3 |
| 4/24/2018 1:37 | 3.6 | 2.5 | 0.1537 | 3.3 |
| 4/24/2018 1:38 | 3.6 | 2.5 | 0.1708 | 3.3 |
| 4/24/2018 1:39 | 3.6 | 2.5 | 0.1518 | 3.4 |
| 4/24/2018 1:40 | 3.7 | 2.5 | 0.1615 | 3.4 |
| 4/24/2018 1:41 | 3.7 | 2.5 | 0.1516 | 3.4 |
| 4/24/2018 1:42 | 3.7 | 2.5 | 0.1608 | 3.5 |
| 4/24/2018 1:43 | 3.6 | 2.5 | 0.1677 | 3.5 |
| 4/24/2018 1:44 | 3.6 | 2.6 | 0.1515 | 3.5 |
| 4/24/2018 1:45 | 3.7 | 2.6 | 0.1661 | 3.5 |
| 4/24/2018 1:46 | 3.6 | 2.6 | 0.156  | 3.5 |
| 4/24/2018 1:47 | 3.6 | 2.6 | 0.163  | 3.5 |
| 4/24/2018 1:48 | 3.6 | 2.6 | 0.1558 | 3.5 |
| 4/24/2018 1:49 | 3.6 | 2.6 | 0.1588 | 3.4 |
| 4/24/2018 1:50 | 3.6 | 2.6 | 0.1689 | 3.4 |
| 4/24/2018 1:51 | 3.8 | 2.6 | 0.153  | 3.4 |
| 4/24/2018 1:52 | 3.7 | 2.6 | 0.1617 | 3.5 |
| 4/24/2018 1:53 | 3.7 | 2.6 | 0.1589 | 3.5 |
| 4/24/2018 1:54 | 3.6 | 2.6 | 0.1617 | 3.5 |
| 4/24/2018 1:55 | 3.8 | 2.6 | 0.165  | 3.5 |
| 4/24/2018 1:56 | 3.7 | 2.6 | 0.1537 | 3.5 |
| 4/24/2018 1:57 | 3.7 | 2.6 | 0.1691 | 3.5 |
| 4/24/2018 1:58 | 3.8 | 2.6 | 0.1506 | 3.5 |
| 4/24/2018 1:59 | 3.8 | 2.6 | 0.1636 | 3.5 |
| 4/24/2018 2:00 | 3.8 | 2.6 | 0.1577 | 3.6 |
| 4/24/2018 2:01 | 3.7 | 2.6 | 0.1619 | 3.5 |
| 4/24/2018 2:02 | 3.7 | 2.6 | 0.1657 | 3.5 |
| 4/24/2018 2:03 | 3.7 | 2.6 | 0.1509 | 3.1 |
| 4/24/2018 2:04 | 3.6 | 2.6 | 0.1683 | 1.8 |
| 4/24/2018 2:05 | 3.6 | 2.6 | 0.1614 | 1.5 |
| 4/24/2018 2:06 | 3.7 | 2.7 | 0.1612 | 1.5 |
| 4/24/2018 2:07 | 3.7 | 2.7 | 0.162  | 1.5 |
| 4/24/2018 2:08 | 3.7 | 2.7 | 0.1638 | 1.5 |
| 4/24/2018 2:09 | 3.8 | 2.7 | 0.1605 | 1.6 |
| 4/24/2018 2:10 | 3.9 | 2.7 | 0.1566 | 1.5 |
| 4/24/2018 2:11 | 3.7 | 2.6 | 0.1658 | 1.5 |
| 4/24/2018 2:12 | 3.8 | 2.6 | 0.1538 | 1.5 |
| 4/24/2018 2:13 | 3.8 | 2.6 | 0.1623 | 1.5 |



|                |     |     |        |     |
|----------------|-----|-----|--------|-----|
| 4/24/2018 2:14 | 3.8 | 2.6 | 0.1534 | 1.6 |
| 4/24/2018 2:15 | 3.8 | 2.6 | 0.1675 | 1.5 |
| 4/24/2018 2:16 | 3.9 | 2.6 | 0.1635 | 1.5 |
| 4/24/2018 2:17 | 3.8 | 2.6 | 0.1539 | 1.5 |
| 4/24/2018 2:18 | 3.9 | 2.6 | 0.167  | 1.5 |
| 4/24/2018 2:19 | 3.9 | 2.7 | 0.1603 | 1.5 |
| 4/24/2018 2:20 | 3.9 | 2.7 | 0.1732 | 1.5 |
| 4/24/2018 2:21 | 3.9 | 2.7 | 0.1581 | 1.5 |
| 4/24/2018 2:22 | 4   | 2.6 | 0.1679 | 1.5 |
| 4/24/2018 2:23 | 4   | 2.6 | 0.1647 | 1.5 |
| 4/24/2018 2:24 | 4.1 | 2.6 | 0.1522 | 1.5 |
| 4/24/2018 2:25 | 4.2 | 2.6 | 0.1654 | 1.5 |
| 4/24/2018 2:26 | 4.3 | 2.6 | 0.1594 | 1.5 |
| 4/24/2018 2:27 | 4.3 | 2.6 | 0.1692 | 1.5 |
| 4/24/2018 2:28 | 4.2 | 2.5 | 0.1598 | 1.5 |
| 4/24/2018 2:29 | 4.2 | 2.5 | 0.1692 | 1.5 |
| 4/24/2018 2:30 | 4.3 | 2.5 | 0.1767 | 1.5 |
| 4/24/2018 2:31 | 4.3 | 2.5 | 0.1541 | 1.5 |
| 4/24/2018 2:32 | 4.3 | 2.5 | 0.1687 | 1.5 |
| 4/24/2018 2:33 | 4.6 | 2.4 | 0.1637 | 1.5 |
| 4/24/2018 2:34 | 4.5 | 2.4 | 0.1697 | 1.5 |
| 4/24/2018 2:35 | 4.2 | 2.5 | 0.1572 | 1.5 |
| 4/24/2018 2:36 | 4.5 | 2.5 | 0.1681 | 1.5 |
| 4/24/2018 2:37 | 4.2 | 2.5 | 0.1679 | 1.5 |
| 4/24/2018 2:38 | 4.2 | 2.5 | 0.1584 | 1.5 |
| 4/24/2018 2:39 | 4   | 2.5 | 0.171  | 1.5 |
| 4/24/2018 2:40 | 4   | 2.6 | 0.1561 | 1.5 |
| 4/24/2018 2:41 | 4.2 | 2.6 | 0.1762 | 1.5 |
| 4/24/2018 2:42 | 4.2 | 2.7 | 0.1618 | 1.6 |
| 4/24/2018 2:43 | 4.3 | 2.7 | 0.1594 | 1.6 |
| 4/24/2018 2:44 | 4.3 | 2.7 | 0.1728 | 1.6 |
| 4/24/2018 2:45 | 4.4 | 2.8 | 0.1589 | 1.6 |
| 4/24/2018 2:46 | 4.6 | 2.8 | 0.1763 | 1.6 |
| 4/24/2018 2:47 | 4.4 | 2.8 | 0.1613 | 1.6 |
| 4/24/2018 2:48 | 4.6 | 2.8 | 0.1675 | 1.6 |
| 4/24/2018 2:49 | 4.5 | 2.8 | 0.1654 | 1.6 |
| 4/24/2018 2:50 | 4.6 | 2.8 | 0.1572 | 1.6 |
| 4/24/2018 2:51 | 4.9 | 2.8 | 0.1715 | 1.6 |
| 4/24/2018 2:52 | 5   | 2.8 | 0.1614 | 1.6 |
| 4/24/2018 2:53 | 5.4 | 2.8 | 0.1737 | 1.6 |
| 4/24/2018 2:54 | 5.4 | 2.8 | 0.1611 | 1.6 |
| 4/24/2018 2:55 | 5.4 | 2.7 | 0.1709 | 1.6 |
| 4/24/2018 2:56 | 5.5 | 2.7 | 0.1688 | 1.6 |
| 4/24/2018 2:57 | 5.5 | 2.8 | 0.1647 | 1.7 |
| 4/24/2018 2:58 | 5.2 | 2.7 | 0.1789 | 1.7 |
| 4/24/2018 2:59 | 5.9 | 2.7 | 0.1742 | 1.6 |
| 4/24/2018 3:00 | 6.1 | 2.7 | 0.1837 | 1.6 |

|                |     |     |        |     |
|----------------|-----|-----|--------|-----|
| 4/24/2018 3:01 | 7   | 2.7 | 0.1797 | 1.6 |
| 4/24/2018 3:02 | 6.7 | 2.7 | 0.1733 | 1.7 |
| 4/24/2018 3:03 | 5.7 | 2.7 | 0.1803 | 1.6 |
| 4/24/2018 3:04 | 6.1 | 2.6 | 0.1716 | 1.6 |
| 4/24/2018 3:05 | 5.6 | 2.7 | 0.1807 | 1.6 |
| 4/24/2018 3:06 | 5.6 | 2.7 | 0.1684 | 1.6 |
| 4/24/2018 3:07 | 5.2 | 2.7 | 0.1817 | 1.6 |
| 4/24/2018 3:08 | 5.5 | 2.7 | 0.1696 | 1.6 |
| 4/24/2018 3:09 | 5.5 | 2.7 | 0.1684 | 1.7 |
| 4/24/2018 3:10 | 5.4 | 2.8 | 0.1683 | 1.6 |
| 4/24/2018 3:11 | 5.7 | 2.8 | 0.1692 | 1.7 |
| 4/24/2018 3:12 | 5.6 | 2.9 | 0.1722 | 1.7 |
| 4/24/2018 3:13 | 5.9 | 2.9 | 0.1647 | 1.7 |
| 4/24/2018 3:14 | 5.9 | 2.9 | 0.1848 | 1.7 |
| 4/24/2018 3:15 | 6.1 | 2.9 | 0.1707 | 1.7 |
| 4/24/2018 3:16 | 6.1 | 3   | 0.1732 | 1.7 |
| 4/24/2018 3:17 | 6   | 3   | 0.1767 | 1.7 |
| 4/24/2018 3:18 | 6   | 3   | 0.1614 | 1.7 |
| 4/24/2018 3:19 | 6.3 | 3   | 0.1806 | 1.7 |
| 4/24/2018 3:20 | 6.2 | 3   | 0.1732 | 1.7 |
| 4/24/2018 3:21 | 6.5 | 3.1 | 0.1726 | 1.7 |
| 4/24/2018 3:22 | 6.4 | 3.1 | 0.1763 | 1.7 |
| 4/24/2018 3:23 | 6.6 | 3.1 | 0.1744 | 1.7 |
| 4/24/2018 3:24 | 6.8 | 3.1 | 0.1789 | 1.7 |
| 4/24/2018 3:25 | 7.1 | 3.1 | 0.1704 | 1.7 |
| 4/24/2018 3:26 | 7.2 | 3.1 | 0.1856 | 1.7 |
| 4/24/2018 3:27 | 7.1 | 3.2 | 0.1716 | 1.7 |
| 4/24/2018 3:28 | 7.8 | 3.1 | 0.1727 | 1.7 |
| 4/24/2018 3:29 | 8.3 | 3.1 | 0.1781 | 1.7 |
| 4/24/2018 3:30 | 8.5 | 3.1 | 0.1697 | 1.8 |
| 4/24/2018 3:31 | 7.7 | 3.1 | 0.1791 | 1.8 |
| 4/24/2018 3:32 | 8.4 | 3.1 | 0.171  | 1.9 |
| 4/24/2018 3:33 | 8.4 | 3.1 | 0.1797 | 1.9 |
| 4/24/2018 3:34 | 8.5 | 3.1 | 0.1744 | 1.8 |
| 4/24/2018 3:35 | 8.1 | 3   | 0.1706 | 1.9 |
| 4/24/2018 3:36 | 7.2 | 3.1 | 0.1813 | 1.9 |
| 4/24/2018 3:37 | 6.8 | 3.1 | 0.1697 | 1.9 |
| 4/24/2018 3:38 | 6.6 | 3.1 | 0.1783 | 1.9 |
| 4/24/2018 3:39 | 7   | 3.1 | 0.1675 | 1.9 |
| 4/24/2018 3:40 | 6.9 | 3.1 | 0.1753 | 1.9 |
| 4/24/2018 3:41 | 6.7 | 3.1 | 0.1869 | 2   |
| 4/24/2018 3:42 | 7.1 | 3.2 | 0.1715 | 1.9 |
| 4/24/2018 3:43 | 6.9 | 3.2 | 0.1891 | 1.9 |
| 4/24/2018 3:44 | 6.7 | 3.2 | 0.1723 | 1.8 |
| 4/24/2018 3:45 | 6.9 | 3.2 | 0.1843 | 1.8 |
| 4/24/2018 3:46 | 7   | 3.1 | 0.1753 | 1.9 |
| 4/24/2018 3:47 | 7   | 3.2 | 0.1653 | 2   |

|                |     |     |        |     |
|----------------|-----|-----|--------|-----|
| 4/24/2018 3:48 | 7   | 3.2 | 0.1847 | 2   |
| 4/24/2018 3:49 | 7.2 | 3.2 | 0.1601 | 2   |
| 4/24/2018 3:50 | 6.9 | 3.1 | 0.1919 | 2.1 |
| 4/24/2018 3:51 | 7.1 | 3.2 | 0.1723 | 2.1 |
| 4/24/2018 3:52 | 7.2 | 3.1 | 0.1722 | 2.1 |
| 4/24/2018 3:53 | 7   | 3.2 | 0.174  | 2.1 |
| 4/24/2018 3:54 | 6.9 | 3.2 | 0.1762 | 2   |
| 4/24/2018 3:55 | 6.9 | 3.2 | 0.1803 | 2   |
| 4/24/2018 3:56 | 6.9 | 3.2 | 0.1667 | 2   |
| 4/24/2018 3:57 | 7   | 3.2 | 0.1843 | 2   |
| 4/24/2018 3:58 | 7   | 3.2 | 0.1712 | 2   |
| 4/24/2018 3:59 | 7.1 | 3.2 | 0.179  | 2   |
| 4/24/2018 4:00 | 7.2 | 3.2 | 0.173  | 2.1 |
| 4/24/2018 4:01 | 7.4 | 3.2 | 0.1665 | 2.1 |
| 4/24/2018 4:02 | 7.5 | 3.1 | 0.1814 | 2.1 |
| 4/24/2018 4:03 | 7.2 | 3.1 | 0.1623 | 2.1 |
| 4/24/2018 4:04 | 7.5 | 3.1 | 0.1799 | 2.1 |
| 4/24/2018 4:05 | 7.5 | 3   | 0.1623 | 2.1 |
| 4/24/2018 4:06 | 7.5 | 3   | 0.1796 | 2   |
| 4/24/2018 4:07 | 7.4 | 3   | 0.1804 | 1.9 |
| 4/24/2018 4:08 | 7.4 | 3   | 0.1726 | 2   |
| 4/24/2018 4:09 | 7.5 | 2.9 | 0.1788 | 2   |
| 4/24/2018 4:10 | 7.4 | 2.9 | 0.166  | 2   |
| 4/24/2018 4:11 | 6.9 | 2.9 | 0.1859 | 2   |
| 4/24/2018 4:12 | 6.8 | 3   | 0.1656 | 2.1 |
| 4/24/2018 4:13 | 6.8 | 3   | 0.1746 | 2.1 |
| 4/24/2018 4:14 | 6.8 | 3   | 0.1756 | 2.1 |
| 4/24/2018 4:15 | 6.8 | 3   | 0.1692 | 2.1 |
| 4/24/2018 4:16 | 6.7 | 3.1 | 0.1799 | 2.1 |
| 4/24/2018 4:17 | 6.7 | 3.1 | 0.1648 | 2.1 |
| 4/24/2018 4:18 | 6.7 | 3.2 | 0.1796 | 2.1 |
| 4/24/2018 4:19 | 6.6 | 3.2 | 0.1692 | 2.3 |
| 4/24/2018 4:20 | 6.8 | 3.2 | 0.1688 | 2.3 |
| 4/24/2018 4:21 | 6.6 | 3.2 | 0.1844 | 2.4 |
| 4/24/2018 4:22 | 6.6 | 3.1 | 0.1679 | 2.4 |
| 4/24/2018 4:23 | 6.6 | 3.1 | 0.1813 | 2.2 |
| 4/24/2018 4:24 | 6.6 | 3.1 | 0.172  | 2.2 |
| 4/24/2018 4:25 | 6.5 | 3.1 | 0.1719 | 2.2 |
| 4/24/2018 4:26 | 6.5 | 3.1 | 0.1743 | 2   |
| 4/24/2018 4:27 | 6.6 | 3.1 | 0.1687 | 2   |
| 4/24/2018 4:28 | 6.5 | 3.1 | 0.1862 | 2   |
| 4/24/2018 4:29 | 6.4 | 3.1 | 0.1625 | 2.1 |
| 4/24/2018 4:30 | 6.5 | 3.1 | 0.1785 | 2.1 |
| 4/24/2018 4:31 | 6.5 | 3.1 | 0.1648 | 2.1 |
| 4/24/2018 4:32 | 6.4 | 3.1 | 0.1769 | 2   |
| 4/24/2018 4:33 | 6.4 | 3.1 | 0.1748 | 1.9 |
| 4/24/2018 4:34 | 6.4 | 3   | 0.1683 | 1.9 |

|                |     |     |        |     |
|----------------|-----|-----|--------|-----|
| 4/24/2018 4:35 | 6.4 | 3   | 0.1819 | 1.9 |
| 4/24/2018 4:36 | 6.3 | 3   | 0.1662 | 1.9 |
| 4/24/2018 4:37 | 6.3 | 3   | 0.1776 | 2   |
| 4/24/2018 4:38 | 6.3 | 2.9 | 0.1719 | 2   |
| 4/24/2018 4:39 | 6.3 | 2.9 | 0.1683 | 2   |
| 4/24/2018 4:40 | 6.3 | 2.8 | 0.1756 | 2   |
| 4/24/2018 4:41 | 6.3 | 2.8 | 0.1607 | 2   |
| 4/24/2018 4:42 | 6.2 | 2.8 | 0.1733 | 1.9 |
| 4/24/2018 4:43 | 6.1 | 2.8 | 0.1696 | 1.9 |
| 4/24/2018 4:44 | 6.2 | 2.8 | 0.1712 | 1.9 |
| 4/24/2018 4:45 | 6   | 2.8 | 0.1733 | 1.9 |
| 4/24/2018 4:46 | 6   | 2.8 | 0.1729 | 1.9 |
| 4/24/2018 4:47 | 6   | 2.9 | 0.1796 | 1.9 |
| 4/24/2018 4:48 | 5.9 | 2.9 | 0.1661 | 1.9 |
| 4/24/2018 4:49 | 5.9 | 2.9 | 0.174  | 1.9 |
| 4/24/2018 4:50 | 5.9 | 3   | 0.1727 | 1.9 |
| 4/24/2018 4:51 | 5.9 | 3   | 0.1694 | 1.9 |
| 4/24/2018 4:52 | 5.9 | 3   | 0.1788 | 1.9 |
| 4/24/2018 4:53 | 5.8 | 3   | 0.1602 | 1.9 |
| 4/24/2018 4:54 | 5.8 | 3.1 | 0.1748 | 2   |
| 4/24/2018 4:55 | 5.8 | 3   | 0.1667 | 2   |
| 4/24/2018 4:56 | 5.7 | 3   | 0.1695 | 1.9 |
| 4/24/2018 4:57 | 5.7 | 3   | 0.1737 | 2   |
| 4/24/2018 4:58 | 5.7 | 3   | 0.1637 | 2   |
| 4/24/2018 4:59 | 5.7 | 3   | 0.1681 | 2   |
| 4/24/2018 5:00 | 5.7 | 3   | 0.1617 | 2   |
| 4/24/2018 5:01 | 5.7 | 3   | 0.1673 | 2.1 |
| 4/24/2018 5:02 | 5.7 | 3   | 0.1751 | 2.1 |
| 4/24/2018 5:03 | 5.6 | 2.9 | 0.1633 | 2.2 |
| 4/24/2018 5:04 | 5.5 | 2.9 | 0.1724 | 2.3 |
| 4/24/2018 5:05 | 5.5 | 2.9 | 0.1597 | 2.2 |
| 4/24/2018 5:06 | 5.6 | 2.8 | 0.1813 | 2.2 |
| 4/24/2018 5:07 | 5.5 | 2.8 | 0.1714 | 2.2 |
| 4/24/2018 5:08 | 5.6 | 2.8 | 0.1687 | 2.2 |
| 4/24/2018 5:09 | 5.5 | 2.7 | 0.1788 | 2.2 |
| 4/24/2018 5:10 | 5.5 | 2.7 | 0.1639 | 2.3 |
| 4/24/2018 5:11 | 5.5 | 2.6 | 0.1759 | 2.5 |
| 4/24/2018 5:12 | 5.5 | 2.6 | 0.1681 | 2.6 |
| 4/24/2018 5:13 | 5.4 | 2.6 | 0.1712 | 2.5 |
| 4/24/2018 5:14 | 5.3 | 2.6 | 0.1702 | 2.4 |
| 4/24/2018 5:15 | 5.3 | 2.6 | 0.1638 | 2.4 |
| 4/24/2018 5:16 | 5.3 | 2.7 | 0.1757 | 2.2 |
| 4/24/2018 5:17 | 5.3 | 2.7 | 0.1684 | 2.2 |
| 4/24/2018 5:18 | 5.3 | 2.8 | 0.1728 | 2.1 |
| 4/24/2018 5:19 | 5.3 | 2.8 | 0.1784 | 2.2 |
| 4/24/2018 5:20 | 5.3 | 2.8 | 0.1641 | 2.2 |
| 4/24/2018 5:21 | 5.2 | 2.9 | 0.1772 | 2.2 |

|                |     |     |        |     |
|----------------|-----|-----|--------|-----|
| 4/24/2018 5:22 | 5.2 | 2.9 | 0.1668 | 2.2 |
| 4/24/2018 5:23 | 5.2 | 2.9 | 0.1765 | 2.1 |
| 4/24/2018 5:24 | 5.1 | 2.9 | 0.1623 | 2.1 |
| 4/24/2018 5:25 | 5.1 | 2.9 | 0.169  | 2.2 |
| 4/24/2018 5:26 | 5.1 | 2.9 | 0.1716 | 2.2 |
| 4/24/2018 5:27 | 5.1 | 2.9 | 0.158  | 2.2 |
| 4/24/2018 5:28 | 5.1 | 2.9 | 0.1725 | 2.2 |
| 4/24/2018 5:29 | 5   | 2.9 | 0.1612 | 2.3 |
| 4/24/2018 5:30 | 5.1 | 2.9 | 0.1672 | 2.4 |
| 4/24/2018 5:31 | 5   | 2.9 | 0.1693 | 2.3 |
| 4/24/2018 5:32 | 5   | 2.9 | 0.1711 | 2.2 |
| 4/24/2018 5:33 | 5   | 2.9 | 0.1793 | 2.2 |
| 4/24/2018 5:34 | 5   | 2.8 | 0.1607 | 2.1 |
| 4/24/2018 5:35 | 5   | 2.8 | 0.1693 | 2   |
| 4/24/2018 5:36 | 5   | 2.8 | 0.1705 | 1.9 |
| 4/24/2018 5:37 | 4.9 | 2.7 | 0.1752 | 1.9 |
| 4/24/2018 5:38 | 4.9 | 2.7 | 0.1574 | 1.9 |
| 4/24/2018 5:39 | 5   | 2.7 | 0.1663 | 1.8 |
| 4/24/2018 5:40 | 5   | 2.7 | 0.1745 | 1.9 |
| 4/24/2018 5:41 | 5   | 2.6 | 0.1657 | 1.9 |
| 4/24/2018 5:42 | 4.9 | 2.6 | 0.1804 | 2   |
| 4/24/2018 5:43 | 5   | 2.6 | 0.1661 | 2   |
| 4/24/2018 5:44 | 5   | 2.6 | 0.1733 | 2   |
| 4/24/2018 5:45 | 4.9 | 2.6 | 0.1737 | 2.1 |
| 4/24/2018 5:46 | 4.9 | 2.6 | 0.1743 | 2.1 |
| 4/24/2018 5:47 | 4.8 | 2.7 | 0.1757 | 2.1 |
| 4/24/2018 5:48 | 4.8 | 2.7 | 0.1655 | 2.1 |
| 4/24/2018 5:49 | 4.8 | 2.7 | 0.1777 | 2.1 |
| 4/24/2018 5:50 | 4.8 | 2.8 | 0.1609 | 2.2 |
| 4/24/2018 5:51 | 4.9 | 2.8 | 0.1811 | 2.2 |
| 4/24/2018 5:52 | 4.9 | 2.8 | 0.1701 | 2.2 |
| 4/24/2018 5:53 | 4.9 | 2.9 | 0.1688 | 2.2 |
| 4/24/2018 5:54 | 4.9 | 2.9 | 0.1745 | 2.1 |
| 4/24/2018 5:55 | 5   | 2.9 | 0.1651 | 2.2 |
| 4/24/2018 5:56 | 5.2 | 2.9 | 0.1819 | 2.2 |
| 4/24/2018 5:57 | 5.1 | 2.9 | 0.1698 | 2.2 |
| 4/24/2018 5:58 | 5.3 | 2.9 | 0.175  | 2.3 |
| 4/24/2018 5:59 | 5.4 | 2.9 | 0.1825 | 2.3 |
| 4/24/2018 6:00 | 5.5 | 2.9 | 0.1668 | 2.3 |
| 4/24/2018 6:01 | 5.6 | 2.9 | 0.1763 | 2.2 |
| 4/24/2018 6:02 | 5.9 | 2.9 | 0.1687 | 2.1 |
| 4/24/2018 6:03 | 6.5 | 3   | 0.1783 | 2.1 |
| 4/24/2018 6:04 | 6.4 | 3   | 0.1787 | 2.2 |
| 4/24/2018 6:05 | 6.6 | 3   | 0.1728 | 2.1 |
| 4/24/2018 6:06 | 6.9 | 3   | 0.1838 | 2   |
| 4/24/2018 6:07 | 6.7 | 3.1 | 0.1762 | 2.1 |
| 4/24/2018 6:08 | 7   | 3.1 | 0.175  | 2.1 |

|                |     |     |        |     |
|----------------|-----|-----|--------|-----|
| 4/24/2018 6:09 | 6.8 | 3.1 | 0.185  | 2.2 |
| 4/24/2018 6:10 | 6.9 | 3.1 | 0.1765 | 2.2 |
| 4/24/2018 6:11 | 6.7 | 3.1 | 0.1844 | 2.3 |
| 4/24/2018 6:12 | 6.3 | 3.1 | 0.1757 | 2.5 |
| 4/24/2018 6:13 | 5.9 | 3.1 | 0.1745 | 2.4 |
| 4/24/2018 6:14 | 5.8 | 3.2 | 0.1841 | 2.4 |
| 4/24/2018 6:15 | 6   | 3.2 | 0.1675 | 2.3 |
| 4/24/2018 6:16 | 5.8 | 3.2 | 0.1786 | 2.3 |
| 4/24/2018 6:17 | 5.7 | 3.2 | 0.1731 | 2.3 |
| 4/24/2018 6:18 | 6   | 3.2 | 0.1797 | 2.3 |
| 4/24/2018 6:19 | 5.8 | 3.2 | 0.1906 | 2.3 |
| 4/24/2018 6:20 | 5.8 | 3.2 | 0.1693 | 2.4 |
| 4/24/2018 6:21 | 6   | 3.2 | 0.189  | 2.3 |
| 4/24/2018 6:22 | 6.2 | 3.2 | 0.1699 | 2.3 |
| 4/24/2018 6:23 | 5.9 | 3.2 | 0.1851 | 2.3 |
| 4/24/2018 6:24 | 6.1 | 3.2 | 0.1845 | 2.3 |
| 4/24/2018 6:25 | 6   | 3.2 | 0.1749 | 2.3 |
| 4/24/2018 6:26 | 6.4 | 3.2 | 0.1813 | 2.1 |
| 4/24/2018 6:27 | 6.5 | 3.2 | 0.1769 | 1.9 |
| 4/24/2018 6:28 | 6.6 | 3.2 | 0.1803 | 1.9 |
| 4/24/2018 6:29 | 6.9 | 3.3 | 0.1686 | 2   |
| 4/24/2018 6:30 | 6.8 | 3.3 | 0.1876 | 2   |
| 4/24/2018 6:31 | 7   | 3.3 | 0.1745 | 2.1 |
| 4/24/2018 6:32 | 7.2 | 3.3 | 0.1821 | 2   |
| 4/24/2018 6:33 | 6.9 | 3.3 | 0.1811 | 2   |
| 4/24/2018 6:34 | 7.4 | 3.3 | 0.178  | 2.1 |
| 4/24/2018 6:35 | 7.6 | 3.3 | 0.1868 | 2.1 |
| 4/24/2018 6:36 | 7.6 | 3.3 | 0.1752 | 2.2 |
| 4/24/2018 6:37 | 7.6 | 3.3 | 0.1822 | 2.3 |
| 4/24/2018 6:38 | 7.3 | 3.3 | 0.1855 | 2.3 |
| 4/24/2018 6:39 | 7.4 | 3.3 | 0.1762 | 2.3 |
| 4/24/2018 6:40 | 7.2 | 3.3 | 0.1828 | 2.3 |
| 4/24/2018 6:41 | 6.7 | 3.3 | 0.173  | 2.2 |
| 4/24/2018 6:42 | 6.5 | 3.4 | 0.1856 | 2.1 |
| 4/24/2018 6:43 | 6.6 | 3.4 | 0.1766 | 2.1 |
| 4/24/2018 6:44 | 6.7 | 3.4 | 0.1819 | 2.1 |
| 4/24/2018 6:45 | 6.6 | 3.4 | 0.1834 | 2.1 |
| 4/24/2018 6:46 | 6.3 | 3.5 | 0.1771 | 2.1 |
| 4/24/2018 6:47 | 6.6 | 3.5 | 0.1855 | 2.2 |
| 4/24/2018 6:48 | 6.8 | 3.5 | 0.1747 | 2.2 |
| 4/24/2018 6:49 | 6.9 | 3.5 | 0.1857 | 2.3 |
| 4/24/2018 6:50 | 6.6 | 3.5 | 0.1803 | 2.2 |
| 4/24/2018 6:51 | 6.6 | 3.5 | 0.1839 | 2.3 |
| 4/24/2018 6:52 | 6.9 | 3.5 | 0.1839 | 2.3 |
| 4/24/2018 6:53 | 7   | 3.5 | 0.1787 | 2.4 |
| 4/24/2018 6:54 | 7   | 3.5 | 0.182  | 2.5 |
| 4/24/2018 6:55 | 7.1 | 3.5 | 0.1806 | 2.6 |

|                |     |      |     |      |     |     |         |     |
|----------------|-----|------|-----|------|-----|-----|---------|-----|
| 4/24/2018 6:56 |     |      |     |      | 7   | 3.5 | 0.1884  | 2.5 |
| 4/24/2018 6:57 |     |      |     |      | 7   | 3.6 | 0.1796  | 2.4 |
| 4/24/2018 6:58 |     |      |     |      | 7.2 | 3.6 | 0.1857  | 2.3 |
| 4/24/2018 6:59 |     |      |     |      | 7.5 | 3.6 | 0.1888  | 2.4 |
| 4/24/2018 7:00 |     |      |     |      | 7.5 | 3.6 | 0.1737  | 2.4 |
| 4/24/2018 7:01 |     |      |     |      | 7.5 | 3.6 | 0.1906  | 2.5 |
| 4/24/2018 7:02 |     |      |     |      | 7.9 | 3.7 | 0.1879  | 2.4 |
| 4/24/2018 7:03 |     |      |     |      | 7.6 | 3.7 | 0.1912  | 2.4 |
| 4/24/2018 7:04 |     |      |     |      | 7.7 | 3.7 | 0.1956  | 2.4 |
| 4/24/2018 7:05 |     |      |     |      | 7.9 | 3.8 | 0.1912  | 2.3 |
| 4/24/2018 7:06 |     |      |     |      | 8.2 | 3.8 | 0.1995  | 2.2 |
| 4/24/2018 7:07 |     |      |     |      | 8.7 | 3.9 | 0.1859  | 2   |
| 4/24/2018 7:08 |     |      |     |      | 8.7 | 3.9 | 0.2009  | 2   |
| 4/24/2018 7:09 |     |      |     |      | 8.6 | 3.9 | 0.195   | 2   |
| 4/24/2018 7:10 |     |      |     |      | 8.1 | 4   | 0.1937  | 2   |
| 4/24/2018 7:11 |     |      |     |      | 7.5 | 4   | 0.1967  | 2   |
| 4/24/2018 7:12 |     |      |     |      | 7.2 | 4   | 0.1788  | 2   |
| 4/24/2018 7:13 |     |      |     |      | 7.4 | 4   | 0.2018  | 2   |
| 4/24/2018 7:14 |     |      |     |      | 7.3 | 4.1 | 0.1878  | 2.1 |
| 4/24/2018 7:15 |     |      |     |      | 7.3 | 4.1 | 0.2024  | 2   |
| 4/24/2018 7:16 |     |      |     |      | 7.5 | 4.1 | 0.1896  | 2   |
| 4/24/2018 7:17 |     |      |     |      | 7.4 | 4.1 | 0.1928  | 2   |
| 4/24/2018 7:18 | 0.2 | -2.4 | 4.3 | 16.8 | 7.5 | 4.1 | 0.2007  | 2   |
| 4/24/2018 7:19 | 0.2 | -2.5 | 3   | 16.9 | 7.6 | 4.1 | 0.1966  | 1.7 |
| 4/24/2018 7:20 | 0.2 | -1.7 | 2.2 | 17.1 | 7.4 | 4.1 | 0.2323  | 1.6 |
| 4/24/2018 7:21 | 0.2 | -0.7 | 2.3 | 16.8 | 7.8 | 4.1 | 0.2234  | 1.6 |
| 4/24/2018 7:22 | 0.3 | -1   | 3.8 | 16.8 | 7.8 | 4.2 | 0.2256  | 1.6 |
| 4/24/2018 7:23 | 0.3 | -0.3 | 2.9 | 17   | 7.9 | 4.2 | 0.2357  | 1.7 |
| 4/24/2018 7:24 | 0.3 | -0.2 | 2   | 17   | 7.7 | 4.2 | 0.2262  | 1.6 |
| 4/24/2018 7:25 | 0.3 | -0.4 | 3.1 | 17   | 7.8 | 4.2 | 0.2399  | 1.7 |
| 4/24/2018 7:26 | 0.3 | -0.2 | 1.5 | 16.9 | 8.3 | 4.3 | 0.2235  | 1.6 |
| 4/24/2018 7:27 | 0.3 | -0.7 | 3.9 | 17.1 | 8.2 | 4.3 | 0.2439  | 1.7 |
| 4/24/2018 7:28 | 0.4 | 0.4  | 2.5 | 17   | 8.4 | 4.4 | 0.2351  | 1.7 |
| 4/24/2018 7:29 | 0.4 | -0.1 | 2.1 | 16.9 | 8.8 | 4.4 | 0.2354  | 1.7 |
| 4/24/2018 7:30 | 0.4 | 0.3  | 2.7 | 17.1 | 9   | 4.4 | 0.2439  | 1.7 |
| 4/24/2018 7:31 | 0.4 | 0.2  | 3.4 | 16.7 | 9   | 4.5 | 0.2312  | 1.7 |
| 4/24/2018 7:32 | 0.4 | -0.1 | 3.5 | 16.8 | 9.5 | 4.5 | 0.2464  | 1.7 |
| 4/24/2018 7:33 | 0.4 | 0.1  | 2.6 | 16.8 | 9.1 | 4.5 | 0.1507  | 1.7 |
| 4/24/2018 7:34 | 0.4 | -0.5 | 2.3 | 16.8 | 9   | 4.6 | 0.0061  | 1.7 |
| 4/24/2018 7:35 | 0.4 | -0.2 | 2.1 | 16.8 | 8.5 | 4.5 | 0.0067  | 1.7 |
| 4/24/2018 7:36 | 0.4 | 0.2  | 3   | 17   | 8.3 | 4.5 | -0.0025 | 1.7 |
| 4/24/2018 7:37 | 0.4 | 0.7  | 3.1 | 17.1 | 8.2 | 4.6 | 0.0328  | 1.7 |
| 4/24/2018 7:38 | 0.4 | 0.2  | 3.1 | 16.8 | 8.1 | 4.6 | 0.1693  | 1.7 |
| 4/24/2018 7:39 | 0.4 | 0.4  | 3.1 | 17.1 | 7.9 | 4.6 | 0.2115  | 1.7 |
| 4/24/2018 7:40 | 0.4 | -0.1 | 2.1 | 17   | 7.9 | 4.6 | 0.2355  | 1.7 |
| 4/24/2018 7:41 | 0.4 | -0.6 | 3.1 | 17.1 | 7.7 | 4.5 | 0.2316  | 1.7 |
| 4/24/2018 7:42 | 0.3 | -0.4 | 2   | 17.2 | 7.8 | 4.6 | 0.2385  | 1.7 |

|                |     |      |     |      |     |     |        |     |
|----------------|-----|------|-----|------|-----|-----|--------|-----|
| 4/24/2018 7:43 | 0.3 | -0.1 | 3.3 | 17   | 7.7 | 4.6 | 0.2231 | 1.7 |
| 4/24/2018 7:44 | 0.3 | 0.6  | 3.7 | 17.3 | 7.8 | 4.6 | 0.2391 | 1.7 |
| 4/24/2018 7:45 | 0.4 | 0.4  | 3.8 | 17.1 | 8.1 | 4.6 | 0.2311 | 1.7 |
| 4/24/2018 7:46 | 0.4 | 0    | 1.4 | 17.2 | 8   | 4.6 | 0.2319 | 1.7 |
| 4/24/2018 7:47 | 0.4 | 0    | 3.3 | 17.2 | 7.8 | 4.6 | 0.2347 | 1.7 |
| 4/24/2018 7:48 | 0.4 | 0.2  | 4.5 | 16.9 | 7.9 | 4.6 | 0.2235 | 1.7 |
| 4/24/2018 7:49 | 0.4 | 0.7  | 2.8 | 17.3 | 8.1 | 4.6 | 0.2381 | 1.7 |
| 4/24/2018 7:50 | 0.4 | 0.4  | 3.3 | 16.9 | 8.4 | 4.6 | 0.2315 | 1.7 |
| 4/24/2018 7:51 | 0.4 | 0.6  | 2.8 | 17.2 | 8.2 | 4.6 | 0.2346 | 1.7 |
| 4/24/2018 7:52 | 0.4 | 0.3  | 4   | 17   | 8.3 | 4.6 | 0.2198 | 1.7 |
| 4/24/2018 7:53 | 0.4 | 0.8  | 3.8 | 17.1 | 8.4 | 4.6 | 0.1999 | 1.6 |
| 4/24/2018 7:54 | 0.4 | 0.4  | 2.7 | 17   | 8.7 | 4.6 | 0.2173 | 1.6 |
| 4/24/2018 7:55 | 0.4 | 0.3  | 1.7 | 17.2 | 8.5 | 4.6 | 0.2045 | 1.6 |
| 4/24/2018 7:56 | 0.4 | 0    | 3   | 17.2 | 8.4 | 4.6 | 0.2051 | 1.7 |
| 4/24/2018 7:57 | 0.4 | 0.2  | 4   | 17   | 8.5 | 4.6 | 0.2029 | 1.6 |
| 4/24/2018 7:58 | 0.4 | 0.6  | 1.5 | 17.2 | 8.3 | 4.6 | 0.2074 | 1.6 |
| 4/24/2018 7:59 | 0.4 | 0.1  | 3   | 16.9 | 8.1 | 4.6 | 0.2094 | 1.6 |
| 4/24/2018 8:00 | 0.3 | -0.2 | 3   | 17.2 | 8.3 | 4.6 | 0.2025 | 1.6 |
| 4/24/2018 8:01 | 0.3 | 0.5  | 2.5 |      | 8.2 | 4.5 | 0.2084 | 1.6 |
| 4/24/2018 8:02 | 0.3 | -0.1 | 4.5 |      | 8.1 | 4.6 | 0.1945 | 1.6 |
| 4/24/2018 8:03 | 0.7 | 1.4  | 5.9 |      | 8.1 | 4.6 | 0.2059 | 1.6 |
| 4/24/2018 8:04 | 0.8 | 0.5  | 2.9 |      | 8.1 | 4.6 | 0.2035 | 1.7 |
| 4/24/2018 8:05 | 0.8 | 0.7  | 2.8 | 1.2  | 8.2 | 4.6 | 0.2024 | 1.6 |
| 4/24/2018 8:06 | 0.5 | 0.6  | 2.1 | 0.7  | 8.2 | 4.6 | 0.2094 | 1.6 |
| 4/24/2018 8:07 | 0.3 | 0.2  | 1.9 | 0.7  | 8   | 4.6 | 0.1932 | 1.6 |
| 4/24/2018 8:08 | 0.3 | 0.5  | 2.1 | 1.4  | 8   | 4.6 | 0.2183 | 1.6 |
| 4/24/2018 8:09 | 0.2 | 0.6  | 4.1 | 1.8  | 8   | 4.6 | 0.2187 | 1.6 |
| 4/24/2018 8:10 | 0.2 | 0.4  | 2.7 | 2    | 8   | 4.7 | 0.2037 | 1.6 |
| 4/24/2018 8:11 | 0.2 | 0.2  | 4   | 2.2  | 8   | 4.7 | 0.2138 | 1.6 |
| 4/24/2018 8:12 | 0.2 | 0.6  | 3.1 | 2.6  | 8   | 4.7 | 0.2051 | 1.6 |
| 4/24/2018 8:13 | 0.3 | 0.2  | 2.9 | 3    | 8.4 | 4.7 | 0.2127 | 1.6 |
| 4/24/2018 8:14 | 0.3 | 0.5  | 3.6 | 3    | 8.3 | 4.7 | 0.2049 | 1.6 |
| 4/24/2018 8:15 | 0.3 | 0.1  | 4.2 | 3.2  | 8.1 | 4.7 | 0.217  | 1.6 |
| 4/24/2018 8:16 | 0.3 | 0    | 2.2 | 3.4  | 8.2 | 4.6 | 0.2111 | 1.7 |
| 4/24/2018 8:17 | 0.3 | 0.1  | 2.8 | 3.3  | 8.1 | 4.6 | 0.2108 | 1.6 |
| 4/24/2018 8:18 | 0.3 | 0.6  | 2.7 | 3.4  | 7.8 | 4.6 | 0.2146 | 1.7 |
| 4/24/2018 8:19 | 0.3 | 0.6  | 2.6 | 3.8  | 7.6 | 4.6 | 0.2039 | 1.7 |
| 4/24/2018 8:20 | 0.2 | 0.6  | 2.9 | 3.6  | 7.7 | 4.6 | 0.2191 | 1.7 |
| 4/24/2018 8:21 | 0.3 | 0.1  | 3.8 | 3.9  | 7.7 | 4.6 | 0.2097 | 1.7 |
| 4/24/2018 8:22 | 0.3 | 0.7  | 3.7 | 5.7  | 7.7 | 4.7 | 0.223  | 1.7 |
| 4/24/2018 8:23 | 0.3 | 1.3  | 4.3 | 4.1  | 7.7 | 4.7 | 0.2086 | 1.7 |
| 4/24/2018 8:24 | 0.4 | -0.2 | 3   | 4.3  | 7.7 | 4.7 | 0.217  | 1.7 |
| 4/24/2018 8:25 | 0.4 | -0.1 | 3.6 | 4.3  | 7.8 | 4.8 | 0.2179 | 1.7 |
| 4/24/2018 8:26 | 0.5 | 0.8  | 2.9 | 4.2  | 7.8 | 4.8 | 0.2124 | 1.7 |
| 4/24/2018 8:27 | 0.5 | 0.8  | 3.9 | 4.6  | 7.9 | 4.8 | 0.2201 | 1.7 |
| 4/24/2018 8:28 | 0.6 | 0.4  | 3.5 | 4.3  | 7.9 | 4.7 | 0.2122 | 1.7 |
| 4/24/2018 8:29 | 0.6 | 0.9  | 1.6 | 4.7  | 7.9 | 4.7 | 0.2174 | 1.7 |



|                |     |     |     |     |     |     |        |     |
|----------------|-----|-----|-----|-----|-----|-----|--------|-----|
| 4/24/2018 8:30 | 0.6 | 0.8 | 3.5 | 4.6 | 7.9 | 4.7 | 0.219  | 1.7 |
| 4/24/2018 8:31 | 0.6 | 0.5 | 2.7 | 4.9 | 7.9 | 4.7 | 0.2186 | 1.8 |
| 4/24/2018 8:32 | 0.6 | 0.9 | 2.9 | 4.8 | 8   | 4.6 | 0.2192 | 1.7 |
| 4/24/2018 8:33 | 0.6 | 1   | 3.7 | 4.7 | 8   | 4.6 | 0.2138 | 1.7 |
| 4/24/2018 8:34 | 0.6 | 1.6 | 3.6 | 4.8 | 8   | 4.6 | 0.2187 | 1.8 |
| 4/24/2018 8:35 | 0.6 | 1.5 | 3.4 | 4.8 | 8   | 4.5 | 0.2154 | 1.8 |
| 4/24/2018 8:36 | 0.6 | 0.7 | 2.7 | 4.6 | 8.1 | 4.5 | 0.2269 | 1.8 |
| 4/24/2018 8:37 | 0.6 | 0.8 | 2.8 | 4.7 | 8.1 | 4.5 | 0.2137 | 1.8 |
| 4/24/2018 8:38 | 0.6 | 0.6 | 3.7 | 4.9 | 8.1 | 4.5 | 0.2186 | 1.8 |
| 4/24/2018 8:39 | 0.6 | 1.1 | 4.8 | 5   | 8.1 | 4.4 | 0.2175 | 1.8 |
| 4/24/2018 8:40 | 0.7 | 1.8 | 2.5 | 4.7 | 8.1 | 4.4 | 0.2186 | 1.8 |
| 4/24/2018 8:41 | 0.7 | 0.5 | 3.2 | 4.8 | 8.1 | 4.4 | 0.2239 | 1.8 |
| 4/24/2018 8:42 | 0.7 | 1.1 | 3.3 | 5   | 8.2 | 4.4 | 0.2095 | 1.8 |
| 4/24/2018 8:43 | 0.7 | 0.7 | 4.1 | 4.9 | 8.2 | 4.4 | 0.2203 | 1.8 |
| 4/24/2018 8:44 | 0.6 | 1.2 | 3.7 | 5   | 8.2 | 4.4 | 0.2126 | 1.8 |
| 4/24/2018 8:45 | 0.6 | 0.8 | 4.1 | 4.8 | 8.2 | 4.3 | 0.2166 | 1.8 |
| 4/24/2018 8:46 | 0.6 | 1.2 | 2.9 | 4.7 | 8.2 | 4.3 | 0.2059 | 1.8 |
| 4/24/2018 8:47 | 0.6 | 0.2 | 3.1 | 4.9 | 8.2 | 4.3 | 0.2105 | 1.8 |
| 4/24/2018 8:48 | 0.6 | 1   | 2.8 | 4.9 | 8.2 | 4.3 | 0.2179 | 1.9 |
| 4/24/2018 8:49 | 0.6 | 1.3 | 3.9 | 4.9 | 8.3 | 4.3 | 0.207  | 1.9 |
| 4/24/2018 8:50 | 0.6 | 0.6 | 4.3 | 5.2 | 8.3 | 4.2 | 0.2161 | 1.8 |
| 4/24/2018 8:51 | 0.6 | 0.6 | 3.2 | 5   | 8.3 | 4.2 | 0.2104 | 1.9 |
| 4/24/2018 8:52 | 0.7 | 0.9 | 4.7 | 4.9 | 8.3 | 4.2 | 0.2239 | 1.9 |
| 4/24/2018 8:53 | 0.8 | 0.8 | 2.7 | 5.1 | 8.3 | 4.2 | 0.2151 | 1.9 |
| 4/24/2018 8:54 | 0.8 | 1.3 | 2.6 | 5.1 | 8.3 | 4.2 | 0.2185 | 2   |
| 4/24/2018 8:55 | 0.8 | 0.7 | 4   | 5.1 | 8.3 | 4.2 | 0.2147 | 2   |
| 4/24/2018 8:56 | 0.8 | 0.1 | 3.7 | 5   | 8.3 | 4.1 | 0.2124 | 2   |
| 4/24/2018 8:57 | 0.8 | 0.5 | 2.4 | 5.3 | 8.3 | 4.1 | 0.2257 | 2   |
| 4/24/2018 8:58 | 0.8 | 1.2 | 3.5 | 4.9 | 8.3 | 4.1 | 0.2024 | 2.1 |
| 4/24/2018 8:59 | 0.8 | 1.3 | 3.2 | 5.1 | 8.3 | 4.1 | 0.2217 | 2   |
| 4/24/2018 9:00 | 0.8 | 0.7 | 3.1 | 4.9 | 8.3 | 4.1 | 0.2088 | 2   |
| 4/24/2018 9:01 | 0.8 | 1.5 | 3.7 | 5.2 | 8.3 | 4.1 | 0.2112 | 2   |
| 4/24/2018 9:02 | 0.8 | 1.2 | 3.1 | 4.9 | 8.3 | 4.1 | 0.2134 | 2.1 |
| 4/24/2018 9:03 | 0.9 | 1.5 | 3.4 | 5   | 8.3 | 4.1 | 0.2141 | 2.1 |
| 4/24/2018 9:04 | 0.9 | 0.9 | 4.2 | 4.9 | 8.3 | 4.1 | 0.2246 | 2.1 |
| 4/24/2018 9:05 | 0.9 | 0.6 | 4.5 | 5.1 | 8.3 | 4   | 0.2104 | 2.1 |
| 4/24/2018 9:06 | 0.9 | 1   | 3.3 | 5   | 8.3 | 4   | 0.2207 | 2.1 |
| 4/24/2018 9:07 | 0.9 | 0.8 | 3.6 | 5.2 | 8.3 | 4   | 0.2186 | 2.1 |
| 4/24/2018 9:08 | 0.9 | 0.8 | 4   | 5.3 | 8.3 | 4   | 0.2058 | 2.1 |
| 4/24/2018 9:09 | 1   | 1.5 | 4.4 | 5.2 | 8.3 | 4   | 0.2163 | 2.1 |
| 4/24/2018 9:10 | 0.9 | 1.3 | 4.3 | 5.2 | 8.2 | 4   | 0.2124 | 1.9 |
| 4/24/2018 9:11 | 0.9 | 1.1 | 2.7 | 5   | 8.3 | 4   | 0.2191 | 1.8 |
| 4/24/2018 9:12 | 0.9 | 1.5 | 5.1 | 5   | 8.3 | 4   | 0.1993 | 1.9 |
| 4/24/2018 9:13 | 0.9 | 1.1 | 3.6 | 5.1 | 8.2 | 4   | 0.2182 | 1.9 |
| 4/24/2018 9:14 | 0.9 | 1.7 | 2.8 | 5.3 | 8.2 | 3.9 | 0.2167 | 1.9 |
| 4/24/2018 9:15 | 1   | 1.2 | 3.9 | 5.1 | 8.1 | 3.9 | 0.2124 | 1.9 |
| 4/24/2018 9:16 | 1   | 0.8 | 2.4 | 5.2 | 8.1 | 3.9 | 0.2123 | 1.9 |

|                 |     |      |      |      |      |       |        |     |
|-----------------|-----|------|------|------|------|-------|--------|-----|
| 4/24/2018 9:17  | 1   | 1.1  | 3.2  | 5.3  | 8.2  | 3.9   | 0.2059 | 1.9 |
| 4/24/2018 9:18  | 1   | 1.7  | 3.9  | 5.4  | 8.1  | 3.8   | 0.2143 | 1.9 |
| 4/24/2018 9:19  | 1   | 0.8  | 3.6  | 5.2  | 8.1  | 3.8   | 0.2056 | 2   |
| 4/24/2018 9:20  | 1.1 | 1.6  | 3.2  | 5.2  | 8.1  | 3.8   | 0.2134 | 2   |
| 4/24/2018 9:21  | 1.1 | 1.8  | 3.4  | 5.4  | 8.1  | 3.8   | 0.2187 | 2.1 |
| 4/24/2018 9:22  | 1.1 | 1.6  | 2.8  | 5.1  | 8.1  | 3.8   | 0.2144 | 2.2 |
| 4/24/2018 9:23  | 1.1 | 1.4  | 3.5  | 5.2  | 8    | 3.8   | 0.2204 | 2.2 |
| 4/24/2018 9:24  | 1.1 | 1.5  | 3.1  | 5.4  | 8    | 3.7   | 0.2139 | 2.2 |
| 4/24/2018 9:25  | 1.2 | 1.7  | 2.1  | 5.4  | 8    | 3.7   | 0.2155 | 2.2 |
| 4/24/2018 9:26  | 1.2 | 1.5  | 2.6  | 5.5  | 8    | 3.7   | 0.2001 | 2.2 |
| 4/24/2018 9:27  | 1.2 | 0.9  | 3.6  | 5.5  | 8    | 3.7   | 0.2209 | 2.1 |
| 4/24/2018 9:28  | 1.2 | 0.9  | 3.8  | 5.3  | 7.9  | 3.6   | 0.21   | 2.1 |
| 4/24/2018 9:29  | 1.3 | 1.6  | 4.1  | 5.5  | 8    | 3.6   | 0.2233 | 2.1 |
| 4/24/2018 9:30  | 1.3 | 2    | 2.8  | 5.7  | 8    | 3.6   | 0.2172 | 2.1 |
| 4/24/2018 9:31  | 1.4 | 0.9  | 2.4  | 5.4  | 8.1  | 3.6   | 0.2011 | 2   |
| 4/24/2018 9:32  | 1.3 | 1.9  | 4    | 5.5  | 8    | 3.6   | 0.2175 | 2   |
| 4/24/2018 9:33  | 1.3 | 0.8  | 4.1  | 5.4  | 8    | 3.6   | 0.2129 | 2   |
| 4/24/2018 9:34  | 1.3 | 1.3  | 3.6  | 5.1  | 8    | 3.6   | 0.2143 | 2   |
| 4/24/2018 9:35  | 1.3 | 0.8  | 4.1  | 4.9  | 7.9  | 3.5   | 0.2192 | 2.1 |
| 4/24/2018 9:36  | 1.2 | 1.4  | 3    | 5.3  | 7.9  | 3.5   | 0.2029 | 2.2 |
| 4/24/2018 9:37  | 1.2 | 0.7  | 3    | 5.1  | 7.9  | 3.5   | 0.2218 | 2.2 |
| 4/24/2018 9:38  | 1.1 | 2.6  | 3    | 5.1  | 7.9  | 3.5   | 0.2008 | 2.1 |
| 4/24/2018 9:39  | 1.1 | 1    | 4.7  | 5.3  | 7.9  | 3.5   | 0.2116 | 2   |
| 4/24/2018 9:40  | 1.1 | 1.4  | 3.5  | 5.3  | 7.9  | 15.6  | 0.2896 | 2   |
| 4/24/2018 9:41  | 0.8 | 0.5  | 4.7  | 6.5  | 29.2 | 62.2  | 0.539  | 1.9 |
| 4/24/2018 9:42  | 0.6 | 1    | 7.6  | 9.8  | 39.5 | 107.6 | 1.1965 | 1.9 |
| 4/24/2018 9:43  | 0.3 | 0.7  | 8.2  | 11.4 | 43.8 | 120.2 | 1.7298 | 2.2 |
| 4/24/2018 9:44  | 0.2 | 0.2  | 8.5  | 14   | 44.6 | 123   | 2.3782 | 2.3 |
| 4/24/2018 9:45  | 0.2 | 0.9  | 9.1  | 14.5 | 44.2 | 122.6 | 2.6979 | 2.5 |
| 4/24/2018 9:46  | 0.2 | -0.1 | 10.1 | 15.1 | 43.3 | 121.2 | 3.0046 | 2.5 |
| 4/24/2018 9:47  | 0.2 | 1.1  | 9.3  | 15   | 42.3 | 121.2 | 3.0894 | 2.6 |
| 4/24/2018 9:48  | 0.2 | 0.4  | 8.3  | 15.1 | 41.4 | 121   | 3.2103 | 2.6 |
| 4/24/2018 9:49  | 0.2 | -0.3 | 9.1  | 14.9 | 40.6 | 120.7 | 3.3725 | 2.7 |
| 4/24/2018 9:50  | 0.2 | -0.1 | 9.2  | 15.2 | 39.8 | 120.3 | 3.4988 | 2.7 |
| 4/24/2018 9:51  | 0.2 | -0.1 |      | 14.6 | 38.4 | 119.4 | 3.4411 | 2.7 |
| 4/24/2018 9:52  | 0.2 | 0.3  | 17.2 | 14.4 | 37.9 | 118.3 | 3.496  | 2.7 |
| 4/24/2018 9:53  | 0.2 | 0.7  | 9.4  | 14.1 | 36.6 | 109.4 | 3.4568 | 2.6 |
| 4/24/2018 9:54  | 0.1 | 0.7  | 9    | 13.7 | 36   | 109.7 | 3.4301 | 2.7 |
| 4/24/2018 9:55  | 0.1 | 0.5  | 8.3  | 13.8 | 35.5 | 108.2 | 3.4214 | 2.7 |
| 4/24/2018 9:56  | 0.1 | 0.9  |      | 13.5 | 34.6 | 106.5 | 3.3596 | 2.7 |
| 4/24/2018 9:57  | 0.1 | -0.2 | 8.3  | 13.5 | 33.8 | 106   | 3.2968 | 2.6 |
| 4/24/2018 9:58  | 0.1 | 0.4  | 8    | 13.6 | 33.2 | 105.4 | 3.2926 | 2.7 |
| 4/24/2018 9:59  | 0.1 | 0.2  | 6.9  | 13   | 32.4 | 104.5 | 3.2011 | 2.6 |
| 4/24/2018 10:00 | 0.1 | 0.2  |      | 13   | 31.8 | 103.4 | 3.1758 | 2.5 |
| 4/24/2018 10:01 | 0.1 | 1.3  |      | 12.7 | 31.2 | 102.5 | 3.1413 | 2.7 |
| 4/24/2018 10:02 | 0.1 | 0.6  |      | 12.5 | 30.9 | 99.6  | 3.1171 | 2.7 |
| 4/24/2018 10:03 | 0.1 | -0.1 | 7.9  | 12.6 | 30.1 | 95.9  | 3.0794 | 2.7 |

|                 |     |      |     |      |      |      |        |     |
|-----------------|-----|------|-----|------|------|------|--------|-----|
| 4/24/2018 10:04 | 0.1 | 0.4  |     | 12.9 | 29.9 | 96   | 3.0533 | 2.7 |
| 4/24/2018 10:05 | 0.1 | 0.1  | 7.1 | 12.1 | 29.3 | 93.6 | 3.0113 | 2.8 |
| 4/24/2018 10:06 | 0.1 | 0.2  | 7.4 | 12.3 | 28.9 | 91   | 3.0023 | 2.8 |
| 4/24/2018 10:07 | 0.1 | 0.2  | 8.3 | 12   | 28.3 | 91   | 2.931  | 2.7 |
| 4/24/2018 10:08 | 0.1 | 0.4  | 7.9 | 12.2 | 27.9 | 91   | 2.9367 | 2.7 |
| 4/24/2018 10:09 | 0.1 | 0.9  | 6.8 | 12   | 27.7 | 91   | 2.9155 | 2.8 |
| 4/24/2018 10:10 | 0.1 | 0.3  | 7.7 | 11.9 | 27.3 | 90.8 | 2.9095 | 2.7 |
| 4/24/2018 10:11 | 0.1 | -0.1 | 6.9 | 11.8 | 27.1 | 90.7 | 2.8893 | 2.8 |
| 4/24/2018 10:12 | 0.1 | 0.2  | 6.4 | 11.4 | 26   | 90.1 | 2.7871 | 3   |
| 4/24/2018 10:13 | 0.1 | 0.6  | 6.7 | 11.4 | 25.6 | 89.3 | 2.7384 | 3   |
| 4/24/2018 10:14 | 0.1 | 0.2  | 7.4 | 11.3 | 25.5 | 88.7 | 2.7725 | 3   |
| 4/24/2018 10:15 | 0.1 | 0.5  | 6.9 | 11.5 | 25.2 | 88   | 2.7538 | 3.2 |
| 4/24/2018 10:16 | 0.1 | 0.8  | 7.6 | 11.5 | 24.8 | 87.1 | 2.7143 | 3.2 |
| 4/24/2018 10:17 | 0.1 | -0.2 | 5.4 | 11.1 | 24.4 | 86.1 | 2.7031 | 3.1 |
| 4/24/2018 10:18 | 0   | 0.4  | 5.9 | 10.7 | 24   | 85.4 | 2.6443 | 3.2 |
| 4/24/2018 10:19 | 0   | 0.2  | 7.2 | 11.3 | 23.8 | 84.4 | 2.6837 | 3.2 |
| 4/24/2018 10:20 | 0   | 0.2  | 7   | 10.5 | 23.3 | 83.6 | 2.6099 | 3.1 |
| 4/24/2018 10:21 | 0   | 0.6  | 6   | 11   | 23   | 83.2 | 2.6138 | 3.1 |
| 4/24/2018 10:22 | 0.1 | 0.5  | 7   | 10.8 | 22.8 | 82.7 | 2.6125 | 3   |
| 4/24/2018 10:23 | 0.1 | 0.4  | 5.6 | 10.6 | 22.2 | 81.4 | 2.5421 | 2.9 |
| 4/24/2018 10:24 | 0.1 | 0.5  | 6.2 | 10.8 | 21.8 | 80.4 | 2.5033 | 3   |
| 4/24/2018 10:25 | 0.1 | 0.8  | 6.7 | 10.7 | 21.5 | 79.6 | 2.4643 | 2.9 |
| 4/24/2018 10:26 | 0.1 | 0    | 5.9 | 10.6 | 21.3 | 78.7 | 2.4764 | 2.9 |
| 4/24/2018 10:27 | 0.1 | 0.4  | 6.4 | 10.1 | 21.1 | 77.7 | 2.4715 | 3   |
| 4/24/2018 10:28 | 0.1 | 0.1  | 6.8 | 10   | 20.4 | 76.7 | 2.3675 | 3   |
| 4/24/2018 10:29 | 0.2 | 0.2  | 6.6 | 10   | 19.9 | 75.3 | 2.3764 | 3   |
| 4/24/2018 10:30 | 0.2 | 0.3  | 6.7 | 10   | 20.3 | 74.3 | 2.4155 | 3   |
| 4/24/2018 10:31 | 0.2 | -0.6 | 5.3 | 10.4 | 20   | 73.7 | 2.4062 | 3   |
| 4/24/2018 10:32 | 0.2 | 0    | 5.9 | 10   | 19.9 | 73.3 | 2.3982 | 3.1 |
| 4/24/2018 10:33 | 0.2 | 0.1  | 5.7 | 10   | 19.7 | 72.6 | 2.378  | 3.2 |
| 4/24/2018 10:34 | 0.2 | 0.3  | 5.9 | 10.1 | 19.5 | 72.2 | 2.3544 | 3   |
| 4/24/2018 10:35 | 0.2 | 0.5  | 4.8 | 10.2 | 19.3 | 71.8 | 2.3894 | 3   |
| 4/24/2018 10:36 | 0.2 | 0.2  | 4.3 | 9.6  | 18.9 | 71.4 | 2.3263 | 2.9 |
| 4/24/2018 10:37 | 0.2 | -0.2 | 4   | 9.7  | 18.3 | 71   | 2.2322 | 3   |
| 4/24/2018 10:38 | 0.1 | 0.3  | 5.6 | 9.7  | 18.1 | 70.3 | 2.2549 | 3.1 |
| 4/24/2018 10:39 | 0.1 | 0.3  | 5.7 | 9.6  | 18.3 | 69.7 | 2.2482 | 3.2 |
| 4/24/2018 10:40 | 0.2 | 0.5  | 7.1 | 9.7  | 18   | 68.9 | 2.2557 | 3.1 |
| 4/24/2018 10:41 | 0.2 | 0.7  | 5.4 | 9.3  | 18   | 68.1 | 2.1776 | 3.2 |
| 4/24/2018 10:42 | 0.2 | 0.2  | 4.7 | 9.3  | 17.7 | 67.3 | 2.1934 | 3   |
| 4/24/2018 10:43 | 0.2 | 0.5  | 6.2 | 9.4  | 17.2 | 66.5 | 2.1478 | 3   |
| 4/24/2018 10:44 | 0.2 | 0    | 5.6 | 9.3  | 17.1 | 65.6 | 2.1623 | 2.8 |
| 4/24/2018 10:45 | 0.1 | 0.8  | 6.2 | 9.5  | 16.9 | 65.1 | 2.1667 | 2.9 |
| 4/24/2018 10:46 | 0.2 | 1.1  | 3.6 | 9.3  | 16.6 | 64.6 | 2.0819 | 3.1 |
| 4/24/2018 10:47 | 0.2 | 0.7  | 6.2 | 9.3  | 16.5 | 63.9 | 2.1175 | 3.1 |
| 4/24/2018 10:48 | 0.2 | 0.8  | 5.4 | 9    | 15.9 | 62.9 | 1.977  | 3.1 |
| 4/24/2018 10:49 | 0.2 | 0.1  | 5.4 | 9.1  | 16   | 62.1 | 2.0355 | 3   |
| 4/24/2018 10:50 | 0.2 | 0.3  | 6.3 | 9    | 16   | 61.6 | 2.0623 | 3   |

|                 |      |      |      |      |      |      |        |     |
|-----------------|------|------|------|------|------|------|--------|-----|
| 4/24/2018 10:51 | 0.2  | 0.6  | 4.8  | 9.1  | 15.8 | 60.9 | 2.0485 | 2.6 |
| 4/24/2018 10:52 | 0.2  | 0.5  | 5.5  | 9.1  | 15.7 | 60.2 | 2.0383 | 2.2 |
| 4/24/2018 10:53 | 0.2  | 0    | 4.6  | 9    | 15.5 | 59.7 | 2.0052 | 2.3 |
| 4/24/2018 10:54 | 0.2  | 0.5  | 4.7  | 8.7  | 15.2 | 59   | 1.9838 | 2.4 |
| 4/24/2018 10:55 | 0.2  | 0.3  | 3.9  | 8.9  | 15.2 | 58.6 | 1.9782 | 2.6 |
| 4/24/2018 10:56 | 0.2  | 0.7  | 5.4  | 8.8  | 14.9 | 58.1 | 1.9558 | 2.6 |
| 4/24/2018 10:57 | 0.2  | 0.2  | 5.4  | 9    | 14.6 | 57.8 | 1.8803 | 2.5 |
| 4/24/2018 10:58 | 0.2  | 0.8  | 3.9  | 8.5  | 14.6 | 57.1 | 1.8897 | 2.4 |
| 4/24/2018 10:59 | 0.3  | 0.5  | 4.9  | 8.4  | 14.2 | 56   | 1.8072 | 2.5 |
| 4/24/2018 11:00 | 0.3  | 0.2  | 5.2  | 8.3  | 14.4 | 55.4 | 1.8567 | 2.5 |
| 4/24/2018 11:01 | 0.3  | 0.4  | 5    | 8.3  | 14   | 54.6 | 1.8181 | 2.6 |
| 4/24/2018 11:02 | 0.3  | 0    | 5.9  | 8.5  | 14.2 | 54   | 1.8505 | 2.5 |
| 4/24/2018 11:03 | 0.3  | -0.1 | 5    | 8.6  | 14.1 | 53.6 | 1.8563 | 2.4 |
| 4/24/2018 11:04 | 0.3  | 0.8  | 5.4  | 8.6  | 13.9 | 53.1 | 1.8235 | 2.4 |
| 4/24/2018 11:05 | 0.3  | 0.3  | 4.7  | 8.3  | 13.6 | 52.5 | 1.7655 | 2.4 |
| 4/24/2018 11:06 | 0.3  | 0.6  | 4.8  | 8.4  | 13.6 | 52   | 1.8123 | 2.4 |
| 4/24/2018 11:07 | 0.3  | 0.9  | 4.1  | 8.5  | 13.6 | 52   | 1.7885 | 2.1 |
| 4/24/2018 11:08 | 0.3  | 0.5  | 5    | 8.5  | 13.2 | 51.6 | 1.701  | 2.2 |
| 4/24/2018 11:09 | 0.3  | 0.7  | 4.5  | 8.2  | 13.1 | 51   | 1.7018 | 2.4 |
| 4/24/2018 11:10 | 0.3  | 0.4  | 4.7  | 8.2  | 13.2 | 50.4 | 1.7235 | 2.5 |
| 4/24/2018 11:11 | 0.3  | 1    | 5.2  | 8.1  | 13.8 | 49.8 | 1.6998 | 2.5 |
| 4/24/2018 11:12 | 0.4  | 0.8  | 5.6  | 8    | 13.6 | 48.8 | 1.5857 | 2.6 |
| 4/24/2018 11:13 | 0.4  | 0.7  | 4.4  | 8    | 13.7 | 48.1 | 1.6598 | 2.7 |
| 4/24/2018 11:14 | 0.5  | 0.8  | 4.5  | 8    | 14.2 | 47.1 | 1.5067 | 2.5 |
| 4/24/2018 11:15 | 0.5  | 0.5  | 4.6  | 8    | 15.6 | 45.8 | 1.5505 | 2.7 |
| 4/24/2018 11:16 | 0.6  | 0.6  | 5.1  | 8    | 16.2 | 44.4 | 1.5138 | 2.8 |
| 4/24/2018 11:17 | 0.6  | 0.7  | 5.1  | 8.1  | 16.8 | 43.3 | 1.4537 | 2.9 |
| 4/24/2018 11:18 | 0.6  | 1.1  | 4.9  | 7.8  | 17   | 42.1 | 1.4043 | 3   |
| 4/24/2018 11:19 | 0.6  | 0.5  | 3.8  | 7.9  | 17.5 | 40.6 | 1.4067 | 3.2 |
| 4/24/2018 11:20 | 0.7  | 1.3  | 5    | 8    | 17   | 30.6 | 1.2762 | 2.8 |
| 4/24/2018 11:21 | 1.1  | 2.5  | 5.1  | 9    | 15.4 | 27.7 | 1.157  | 2.4 |
| 4/24/2018 11:22 | 2.7  | 8.3  | 7.1  | 12.7 | 14.1 | 14.2 | 0.7577 | 2.3 |
| 4/24/2018 11:23 | 5.3  | 11.1 | 6.3  | 15.3 | 10.8 | 6.8  | 0.47   | 2.4 |
| 4/24/2018 11:24 | 8.1  | 13.8 | 9.9  | 16.8 | 9.5  | 6.4  | 0.3942 | 2.5 |
| 4/24/2018 11:25 | 10.3 | 15   | 10   | 17.6 | 8.5  | 5.9  | 0.342  | 2.4 |
| 4/24/2018 11:26 | 11.6 | 15.3 | 10.3 | 18.6 | 7.8  | 5.4  | 0.3131 | 2.3 |
| 4/24/2018 11:27 | 12.6 | 16.4 | 10.2 | 19.6 | 7.7  | 4.8  | 0.31   | 2.2 |
| 4/24/2018 11:28 | 13.6 | 16.6 | 11.9 | 19.9 | 7.2  | 4.3  | 0.2792 | 2.3 |
| 4/24/2018 11:29 | 14.3 | 17.3 | 11.4 | 20.5 | 6.9  | 3.7  | 0.288  | 2.4 |
| 4/24/2018 11:30 | 14.8 | 16.8 | 11.7 | 20   | 7.2  | 3.2  | 0.2834 | 2.4 |
| 4/24/2018 11:31 | 15   | 16.9 | 11.5 | 20.1 | 7.5  | 2.6  | 0.2821 | 2.4 |
| 4/24/2018 11:32 | 15.3 | 18.6 | 10.5 | 21.1 | 7.7  | 2.2  | 0.2649 | 2.4 |
| 4/24/2018 11:33 | 15.7 | 18.8 | 12.4 | 21.2 | 7.5  | 2    | 0.2567 | 2.5 |
| 4/24/2018 11:34 | 16.1 | 19.4 | 12.9 | 21.8 | 7.5  | 1.9  | 0.26   | 2.5 |
| 4/24/2018 11:35 | 16.7 | 19.1 | 12.6 | 22.1 | 7.2  | 1.8  | 0.2458 | 2.5 |
| 4/24/2018 11:36 | 17.3 | 19.4 | 13.9 | 23   | 7    | 1.7  | 0.2481 | 2.3 |
| 4/24/2018 11:37 | 17.4 | 17.1 | 10.6 | 20.8 | 10.9 | 1.7  | 0.3303 | 2.3 |

|                 |      |      |      |      |       |       |        |     |
|-----------------|------|------|------|------|-------|-------|--------|-----|
| 4/24/2018 11:38 | 15.9 | 11   | 7    | 15.2 | 59.6  | 3.9   | 0.7301 | 2.7 |
| 4/24/2018 11:39 | 12.2 | 8.8  | 6.8  | 13   | 82.4  | 10.2  | 1.2697 | 3.4 |
| 4/24/2018 11:40 | 8.9  | 7.8  | 6.9  | 12.6 | 74.5  | 9     | 1.1075 | 3.3 |
| 4/24/2018 11:41 | 6.7  | 6    | 7.7  | 11.5 | 81.7  | 10    | 1.2478 | 3.5 |
| 4/24/2018 11:42 | 5.9  | 5.2  | 6.3  | 10.5 | 81.7  | 10.4  | 1.2905 | 3.6 |
| 4/24/2018 11:43 | 4.8  | 3.5  | 4.9  | 9.1  | 101.5 | 27.6  | 1.3803 | 3.6 |
| 4/24/2018 11:44 | 3.1  | 1.1  | 5.5  | 8.6  | 140   | 95.6  | 1.837  | 3.6 |
| 4/24/2018 11:45 | 1.5  | 0.6  | 7.2  | 9.9  | 156.8 | 158.6 | 2.3348 | 3.6 |
| 4/24/2018 11:46 | 0.4  | 1.2  | 8.7  | 13.3 | 162.5 | 197.4 | 3.0128 | 3.7 |
| 4/24/2018 11:47 | 0.2  | 1.2  | 11.9 | 18.3 | 164.6 | 198.9 | 3.5432 | 4   |
| 4/24/2018 11:48 | 0.1  | -0.2 | 12.2 | 21.4 | 163.1 | 199.6 | 4.3863 | 4.3 |
| 4/24/2018 11:49 | 0.2  | 0.6  | 12.5 | 21.2 | 162.7 | 206.6 | 4.5523 | 4.3 |
| 4/24/2018 11:50 | 0.1  | 1.1  | 12.4 | 21.9 | 161.3 | 205.7 | 4.8215 | 4.5 |
| 4/24/2018 11:51 | 0.1  | 0.1  | 13.1 | 21.6 | 156.8 | 198.8 | 5.0885 | 4.5 |
| 4/24/2018 11:52 | 0.1  | 0.6  | 13.3 | 21   | 155.5 | 191.1 | 5.3283 | 4.6 |
| 4/24/2018 11:53 | 0.1  | 0.6  | 12.3 | 21.9 | 162.2 | 194.9 | 5.797  | 4.8 |
| 4/24/2018 11:54 | 0.1  | 0.8  | 14.5 | 21.2 | 159   | 191.3 | 5.83   | 4.9 |
| 4/24/2018 11:55 | 0.1  | 0.7  | 11.4 | 21.5 | 165.1 | 194.3 | 6.133  | 5   |
| 4/24/2018 11:56 | 0.1  | 0.5  | 12.4 | 21.2 | 166.9 | 192.4 | 6.3493 | 5.2 |
| 4/24/2018 11:57 | 0.1  | 0.4  | 12.4 | 20.1 | 157.1 | 181.8 | 6.3102 | 5.1 |
| 4/24/2018 11:58 | 0.1  | 0.4  | 12.6 | 19.6 | 158.5 | 180.3 | 6.4057 | 5.1 |
| 4/24/2018 11:59 | 0.1  | 0.5  | 12.3 | 19.2 | 157.2 | 176.6 | 6.3872 | 5.2 |
| 4/24/2018 12:00 | 0.1  | 0    | 9.9  | 19.2 | 158.5 | 177.8 | 6.5733 | 5.2 |
| 4/24/2018 12:01 | 0.1  | 0.5  | 10.6 | 18.7 | 152.2 | 177.1 | 6.4018 | 5.2 |
| 4/24/2018 12:02 | 0.1  | 1.3  | 11.2 | 18.3 | 154.7 | 172.9 | 6.5347 | 5.2 |
| 4/24/2018 12:03 | 0.1  | 0.2  | 11.1 | 18.8 | 157.7 | 176.9 | 6.8058 | 5.4 |
| 4/24/2018 12:04 | 0.1  | 0.9  | 10.9 | 18.2 | 155.4 | 173.5 | 6.654  | 5.4 |
| 4/24/2018 12:05 | 0.2  | 0.7  | 10.3 | 17.9 | 155.4 | 176.8 | 6.8487 | 5.5 |
| 4/24/2018 12:06 | 0.2  | 1.2  | 10.5 | 17.2 | 150.8 | 167.6 | 6.684  | 5.5 |
| 4/24/2018 12:07 | 0.2  | 0.6  | 10.6 | 17   | 148   | 165.7 | 6.5433 | 5.5 |
| 4/24/2018 12:08 | 0.2  | 0.3  | 10.4 | 17.5 | 153.4 | 169.3 | 6.7448 | 5.6 |
| 4/24/2018 12:09 | 0.2  | 0.7  | 9.5  | 16.7 | 146.5 | 167.5 | 6.708  | 5.6 |
| 4/24/2018 12:10 | 0.2  | 0.2  | 9.6  | 16   | 137.1 | 158.2 | 6.1703 | 5.5 |
| 4/24/2018 12:11 | 0.2  | 0.1  | 9.8  | 16   | 143.9 | 157.4 | 6.481  | 5.7 |
| 4/24/2018 12:12 | 0.2  | 0.4  | 10.1 | 16.2 | 142   | 154.6 | 6.3872 | 5.7 |
| 4/24/2018 12:13 | 0.2  | 0.3  | 10.4 | 15.7 | 142.6 | 157.9 | 6.458  | 5.8 |
| 4/24/2018 12:14 | 0.2  | 0.5  | 8.9  | 15.7 | 143.7 | 155.9 | 6.5177 | 5.7 |
| 4/24/2018 12:15 | 0.2  | 0.8  | 9.6  | 15.3 | 136   | 148.5 | 6.1842 | 5.4 |
| 4/24/2018 12:16 | 0.2  | 0.7  | 8.1  | 15.1 | 135.6 | 152.1 | 6.2603 | 5.3 |
| 4/24/2018 12:17 | 0.2  | 1    | 7.6  | 14.4 | 128.6 | 142.5 | 5.989  | 5.1 |
| 4/24/2018 12:18 | 0.2  | 0.3  | 8.5  | 14.2 | 126.8 | 139.3 | 6.023  | 5   |
| 4/24/2018 12:19 | 0.2  | 0.4  | 7.5  | 13.8 | 122   | 138.1 | 5.848  | 4.9 |
| 4/24/2018 12:20 | 0.2  | 1.2  | 7.5  | 13.3 | 118.8 | 130.1 | 5.6822 | 4.9 |
| 4/24/2018 12:21 | 0.2  | 0.8  | 7.2  | 13.3 | 117.8 | 125.5 | 5.499  | 5   |
| 4/24/2018 12:22 | 0.3  | 0.7  | 8.8  | 12.9 | 115.7 | 122.9 | 5.3763 | 4.9 |
| 4/24/2018 12:23 | 0.3  | -0.4 | 7.2  | 12.6 | 111.3 | 120.4 | 5.2028 | 4.8 |
| 4/24/2018 12:24 | 0.3  | 1.2  | 6    | 12.7 | 111.3 | 122.1 | 5.3492 | 4.8 |

|                 |     |      |      |      |       |       |        |     |
|-----------------|-----|------|------|------|-------|-------|--------|-----|
| 4/24/2018 12:25 | 0.3 | 1.4  | 8.8  | 12   | 104   | 116   | 5.0835 | 4.8 |
| 4/24/2018 12:26 | 0.3 | 0.6  | 7.9  | 12.7 | 106.6 | 113.8 | 5.2142 | 4.9 |
| 4/24/2018 12:27 | 0.3 | 0.4  | 7.7  | 12.9 | 113.1 | 125.9 | 5.4595 | 5.1 |
| 4/24/2018 12:28 | 0.3 | 0.9  | 7.9  | 13.5 | 124.5 | 134.2 | 5.7367 | 5.3 |
| 4/24/2018 12:29 | 0.3 | 0.3  | 9.8  | 13.9 | 126.7 | 137.5 | 6.0148 | 5.5 |
| 4/24/2018 12:30 | 0.3 | 0.8  | 8.2  | 13.8 | 127.9 | 139   | 6.0848 | 5.7 |
| 4/24/2018 12:31 | 0.3 | 0.9  | 8.3  | 13.7 | 128.8 | 141.7 | 6.137  | 5.8 |
| 4/24/2018 12:32 | 0.3 | 0.3  | 8.7  | 13.3 | 126.4 | 141.6 | 6.0528 | 5.9 |
| 4/24/2018 12:33 | 0.3 | 0.5  | 8.5  | 13.4 | 124.7 | 140.9 | 6.0452 | 5.9 |
| 4/24/2018 12:34 | 0.2 | 0.7  | 8.7  | 13.4 | 123.5 | 140.3 | 5.9185 | 6   |
| 4/24/2018 12:35 | 0.2 | 0.8  | 7.6  | 13   | 120.5 | 136.9 | 5.8458 | 6   |
| 4/24/2018 12:36 | 0.2 | 1.2  | 7.6  | 13   | 117.6 | 133.2 | 5.7513 | 5.8 |
| 4/24/2018 12:37 | 0.2 | 0.6  | 8.4  | 12.2 | 111.8 | 124.5 | 5.4475 | 5.7 |
| 4/24/2018 12:38 | 0.2 | 0.6  | 8    | 11.6 | 103.9 | 116.1 | 5.2095 | 5.6 |
| 4/24/2018 12:39 | 0.2 | 0.5  | 7    | 11.6 | 102.3 | 114.6 | 5.2238 | 5.6 |
| 4/24/2018 12:40 | 0.2 | 0    | 8.4  | 11.9 | 98.8  | 111.4 | 5.1035 | 5.6 |
| 4/24/2018 12:41 | 0.2 | 0.7  | 6.1  | 11.4 | 95.8  | 107.2 | 4.9342 | 5.6 |
| 4/24/2018 12:42 | 0.2 | 0.8  | 6.3  | 11.2 | 97.5  | 103.8 | 4.7587 | 5.5 |
| 4/24/2018 12:43 | 0.2 | 0.5  | 6.8  | 12.3 | 98.7  | 103.6 | 5.145  | 5.8 |
| 4/24/2018 12:44 | 0.2 | 0.5  | 7.3  | 10.9 | 93    | 107.5 | 4.8193 | 5.7 |
| 4/24/2018 12:45 | 0.2 | 0.4  |      | 11.2 | 96.6  | 111.1 | 4.8338 | 5.7 |
| 4/24/2018 12:46 | 0.2 | 1    | 8.9  | 11.6 | 102.8 | 112.8 | 5.1395 | 5.9 |
| 4/24/2018 12:47 | 0.2 | 0.7  |      | 11.7 | 100.7 | 112.9 | 5.1528 | 5.9 |
| 4/24/2018 12:48 | 0.2 | 0.6  | 6.4  | 11.8 | 101.4 | 116.1 | 5.3115 | 6.1 |
| 4/24/2018 12:49 | 0.2 | 0.7  | 7.5  | 11.9 | 102.9 | 118.2 | 5.34   | 6.1 |
| 4/24/2018 12:50 | 0.1 | 0.4  |      | 11.6 | 105.2 | 119.5 | 5.4442 | 6.2 |
| 4/24/2018 12:51 | 0.1 | 1    | 6.6  | 11.8 | 104.7 | 120.4 | 5.451  | 6.2 |
| 4/24/2018 12:52 | 0.1 | 0.7  | 7    | 11.7 | 104.2 | 120.3 | 5.4365 | 6.2 |
| 4/24/2018 12:53 | 0.1 | 1    |      | 11.6 | 102.8 | 120.2 | 5.399  | 6.3 |
| 4/24/2018 12:54 | 0.2 | 1.2  |      | 11.7 | 101.3 | 120   | 5.3232 | 6.4 |
| 4/24/2018 12:55 | 0.2 | 0.5  | 6.2  | 11.2 | 97.2  | 112.7 | 5.1447 | 6.2 |
| 4/24/2018 12:56 | 0.2 | -0.4 | 14.6 | 10.9 | 93.3  | 109   | 5.0285 | 6.1 |
| 4/24/2018 12:57 | 0.1 | 0.8  |      | 11.2 | 94.9  | 112.3 | 5.1205 | 6.1 |
| 4/24/2018 12:58 | 0.2 | 0.9  | 6.1  | 10.4 | 87    | 103.6 | 4.7338 | 5.8 |
| 4/24/2018 12:59 | 0.2 | 0.5  | 8.5  | 10.4 | 80.4  | 93.4  | 4.433  | 5.6 |
| 4/24/2018 13:00 | 0.2 | 0.6  | 4.9  | 10.5 | 84.4  | 98    | 4.6457 | 5.7 |
| 4/24/2018 13:01 | 0.2 | 0.4  | 6.9  | 9.7  | 73.2  | 89.6  | 4.2275 | 5.6 |
| 4/24/2018 13:02 | 0.3 | 1.5  | 5.3  | 9.3  | 65.8  | 81.8  | 3.8225 | 5.3 |
| 4/24/2018 13:03 | 0.4 | 1.2  | 3.7  | 9.1  | 58.6  | 69.7  | 3.194  | 5   |
| 4/24/2018 13:04 | 0.5 | 0.9  | 4.9  | 9.7  | 61.9  | 80.4  | 3.8288 | 5.2 |
| 4/24/2018 13:05 | 1.2 | 4.5  | 6.7  | 10.8 | 44.1  | 41.3  | 2.2535 | 4.1 |
| 4/24/2018 13:06 | 2.6 | 6.9  | 5.7  | 11.9 | 32.2  | 18.3  | 1.38   | 3.3 |
| 4/24/2018 13:07 | 4.6 | 9.2  | 7    | 13.2 | 22.8  | 9.9   | 0.931  | 3   |
| 4/24/2018 13:08 | 6.4 | 9.6  | 7.8  | 13.8 | 20.1  | 7.3   | 0.7677 | 2.8 |
| 4/24/2018 13:09 | 7.5 | 9.8  | 7.3  | 13.8 | 19.3  | 6.7   | 0.783  | 2.9 |
| 4/24/2018 13:10 | 8   | 10.1 | 7.6  | 14.5 | 19.1  | 6.8   | 0.7836 | 2.9 |
| 4/24/2018 13:11 | 8.2 | 10.4 | 7.4  | 14.7 | 18.5  | 6.8   | 0.8206 | 3   |

|                 |      |      |      |      |      |     |        |     |
|-----------------|------|------|------|------|------|-----|--------|-----|
| 4/24/2018 13:12 | 8.6  | 12.3 | 8    | 15.5 | 16.9 | 6.8 | 0.7132 | 2.9 |
| 4/24/2018 13:13 | 8.9  | 11.5 | 7.8  | 15.6 | 17   | 6.8 | 0.7497 | 2.8 |
| 4/24/2018 13:14 | 9.2  | 11.9 | 9.5  | 15.9 | 16.5 | 6.8 | 0.7115 | 2.8 |
| 4/24/2018 13:15 | 9.4  | 11.6 | 9.1  | 15.9 | 16.9 | 6.7 | 0.738  | 2.7 |
| 4/24/2018 13:16 | 9.8  | 12.5 | 9.8  | 16.4 | 15.4 | 6.6 | 0.7742 | 2.5 |
| 4/24/2018 13:17 | 10.2 | 12.4 | 9.7  | 16.3 | 14.8 | 6.3 | 0.8134 | 2.4 |
| 4/24/2018 13:18 | 10.5 | 12   | 8.1  | 16.4 | 14.7 | 6.1 | 0.7408 | 2.4 |
| 4/24/2018 13:19 | 10.7 | 13.3 | 9.1  | 17   | 14.7 | 5.8 | 0.6619 | 2.4 |
| 4/24/2018 13:20 | 11.1 | 13.7 | 8.7  | 17.6 | 12.4 | 5.3 | 0.5402 | 2.4 |
| 4/24/2018 13:21 | 11.7 | 14.9 | 10.2 | 18.3 | 11.4 | 5   | 0.5088 | 2.6 |
| 4/24/2018 13:22 | 12.6 | 15.7 | 10   | 19.2 | 9.9  | 4.6 | 0.434  | 2.6 |
| 4/24/2018 13:23 | 13.1 | 15.5 | 10.8 | 18.7 | 9.9  | 4.1 | 0.4474 | 2.5 |
| 4/24/2018 13:24 | 13.4 | 15.8 | 10   | 19.3 | 9.8  | 3.7 | 0.4164 | 2.4 |
| 4/24/2018 13:25 | 13.6 | 16.2 | 9    | 19.4 | 10   | 3.4 | 0.403  | 2.4 |
| 4/24/2018 13:26 | 13.9 | 16.6 | 11.1 | 19.8 | 9.4  | 3.1 | 0.3978 | 2.4 |
| 4/24/2018 13:27 | 14.2 | 16.2 | 11.4 | 19.1 | 9.9  | 2.8 | 0.4194 | 2.4 |
| 4/24/2018 13:28 | 14.4 | 16.3 | 10.4 | 19.9 | 9.4  | 2.7 | 0.3976 | 2.4 |
| 4/24/2018 13:29 | 14.6 | 16.7 | 11   | 19.8 | 8.9  | 2.5 | 0.3743 | 2.4 |
| 4/24/2018 13:30 | 14.8 | 17.3 | 11.4 | 20.2 | 8.7  | 2.4 | 0.3689 | 2.1 |
| 4/24/2018 13:31 | 14.8 | 16.4 | 10.9 | 19.7 | 9.2  | 2.4 | 0.4085 | 2   |
| 4/24/2018 13:32 | 14.6 | 15.8 | 11.3 | 19.4 | 9.5  | 2.4 | 0.4352 | 2   |
| 4/24/2018 13:33 | 14.4 | 16.7 | 12.1 | 19.4 | 10.6 | 2.4 | 0.4536 | 2.1 |
| 4/24/2018 13:34 | 14.5 | 16.6 | 10.7 | 19.7 | 9.4  | 2.4 | 0.3975 | 2   |
| 4/24/2018 13:35 | 15.1 | 18.7 | 11.5 | 21.4 | 8.1  | 2.4 | 0.3508 | 2   |
| 4/24/2018 13:36 | 15.8 | 18.1 | 12.4 | 21.2 | 8.1  | 2.3 | 0.356  | 2   |
| 4/24/2018 13:37 | 16.3 | 17.9 | 12   | 21.4 | 8.2  | 2.3 | 0.3677 | 2   |
| 4/24/2018 13:38 | 16.5 | 18.8 | 10.5 | 21.2 | 7.6  | 2.3 | 0.341  | 2   |
| 4/24/2018 13:39 | 16.7 | 18.6 | 13.8 | 21.5 | 7.3  | 2.3 | 0.3295 | 2   |
| 4/24/2018 13:40 | 16.9 | 18.8 | 13.1 | 21.7 | 7    | 2.2 | 0.3139 | 2   |
| 4/24/2018 13:41 | 17   | 18.4 | 9.2  | 21.5 | 7.1  | 2.1 | 0.3089 | 2   |
| 4/24/2018 13:42 | 17.1 | 18.6 | 12.2 | 21.6 | 7.3  | 2   | 0.3234 | 2   |
| 4/24/2018 13:43 | 17   | 18.9 | 11.5 | 21.7 | 7.8  | 1.9 | 0.3084 | 2.1 |
| 4/24/2018 13:44 | 17   | 19.4 | 12   | 21.7 | 7.8  | 1.9 | 0.3161 | 2.1 |
| 4/24/2018 13:45 | 17.2 | 19.1 | 11.8 | 22.1 | 7.6  | 1.8 | 0.3036 | 2.2 |
| 4/24/2018 13:46 | 17.5 | 19.5 | 11.5 | 22.5 | 6.6  | 1.8 | 0.2886 | 2.2 |
| 4/24/2018 13:47 | 17.9 | 20.2 | 12.6 | 22.1 | 6.4  | 1.7 | 0.2898 | 2.3 |
| 4/24/2018 13:48 | 18.2 | 21.3 | 13.1 | 23.6 | 5.5  | 1.7 | 0.2514 | 2.4 |
| 4/24/2018 13:49 | 18.8 | 21.4 | 12.3 | 23.8 | 5.1  | 1.6 | 0.2444 | 2.5 |
| 4/24/2018 13:50 | 19   | 20.9 | 13.2 | 23.1 | 5.2  | 1.6 | 0.2506 | 2.5 |
| 4/24/2018 13:51 | 18.5 | 18.2 | 11.3 | 21.5 | 7.9  | 1.6 | 0.3321 | 2.7 |
| 4/24/2018 13:52 | 16.9 | 14.9 | 9.6  | 18.8 | 15.1 | 1.8 | 0.53   | 3.2 |
| 4/24/2018 13:53 | 14.9 | 14.3 | 10.7 | 18.1 | 18.3 | 2.1 | 0.6173 | 3.5 |
| 4/24/2018 13:54 | 13.5 | 14.9 | 9.9  | 18   | 17.5 | 2.4 | 0.5599 | 3.4 |
| 4/24/2018 13:55 | 13   | 13.9 | 10   | 17.5 | 16.5 | 2.6 | 0.5396 | 3.2 |
| 4/24/2018 13:56 | 12.7 | 13.6 | 8.8  | 16.7 | 15.2 | 2.8 | 0.5145 | 3.2 |
| 4/24/2018 13:57 | 12.5 | 13.4 | 8.9  | 17.2 | 15.5 | 3.1 | 0.5224 | 3.4 |
| 4/24/2018 13:58 | 12.3 | 13.6 | 8.2  | 16.8 | 16   | 3.4 | 0.524  | 3.4 |

|                 |      |      |      |      |      |      |        |     |
|-----------------|------|------|------|------|------|------|--------|-----|
| 4/24/2018 13:59 | 12   | 12.2 | 8.8  | 16.3 | 14.7 | 3.6  | 0.5118 | 3.4 |
| 4/24/2018 14:00 | 11.7 | 12.7 | 8.7  | 16.5 | 14.4 | 3.7  | 0.4911 | 3.4 |
| 4/24/2018 14:01 | 11.5 | 12.6 | 9.4  | 15.8 | 14   | 3.6  | 0.5094 | 3.3 |
| 4/24/2018 14:02 | 11.3 | 11.7 | 8.1  | 15.3 | 15.5 | 3.6  | 0.5498 | 3.5 |
| 4/24/2018 14:03 | 11.3 | 14   | 8.9  | 16.8 | 14.9 | 3.6  | 0.5533 | 3.5 |
| 4/24/2018 14:04 | 12.5 | 17.5 | 12.7 | 20   | 10.9 | 3.6  | 0.4579 | 3.1 |
| 4/24/2018 14:05 | 14.6 | 20.7 | 11.9 | 22.3 | 8.5  | 3.4  | 0.3569 | 2.7 |
| 4/24/2018 14:06 | 17.1 | 20.1 | 13.9 | 22.8 | 7.5  | 3.3  | 0.347  | 2.5 |
| 4/24/2018 14:07 | 18.4 | 20   | 12.9 | 22.8 | 7.4  | 3.1  | 0.3404 | 2.4 |
| 4/24/2018 14:08 | 18.8 | 20   | 12.8 | 22.8 | 7.2  | 2.9  | 0.3309 | 2.3 |
| 4/24/2018 14:09 | 19   | 21.3 | 13.5 | 23.6 | 6.8  | 2.7  | 0.3182 | 2.2 |
| 4/24/2018 14:10 | 19.6 | 22.4 | 14.4 | 24.6 | 5.9  | 2.5  | 0.2754 | 2.1 |
| 4/24/2018 14:11 | 20.3 | 23.2 | 13.4 | 24.9 | 5.3  | 2.2  | 0.2588 | 2   |
| 4/24/2018 14:12 | 21.1 | 22.7 | 14   | 24.9 | 5.1  | 1.9  | 0.2493 | 2   |
| 4/24/2018 14:13 | 21.3 | 22.4 | 15.2 | 24.6 | 5.2  | 1.7  | 0.2566 | 2   |
| 4/24/2018 14:14 | 21.4 | 22.6 | 13.4 | 25.1 | 5.1  | 1.7  | 0.2491 | 2.1 |
| 4/24/2018 14:15 | 21.4 | 22.9 | 14.9 | 25.1 | 5    | 1.6  | 0.2376 | 2.1 |
| 4/24/2018 14:16 | 21.5 | 23.3 | 14.9 | 25.3 | 4.8  | 1.5  | 0.2499 | 2.2 |
| 4/24/2018 14:17 | 21.5 | 23.1 | 13   | 24.8 | 4.9  | 1.4  | 0.2338 | 2.1 |
| 4/24/2018 14:18 | 21.4 | 23.1 | 15.5 | 25   | 4.9  | 1.3  | 0.2478 | 2.1 |
| 4/24/2018 14:19 | 21.5 | 24.4 | 14.9 | 25.7 | 4.7  | 1.3  | 0.232  | 2.1 |
| 4/24/2018 14:20 | 22.1 | 24.9 | 15.3 | 27   | 4.4  | 1.2  | 0.2179 | 2.2 |
| 4/24/2018 14:21 | 23   | 25.6 | 15.9 | 27.8 | 4.1  | 1.2  | 0.2104 | 2.2 |
| 4/24/2018 14:22 | 23.8 | 25.1 | 15.1 | 27.6 | 4    | 1.2  | 0.192  | 2.2 |
| 4/24/2018 14:23 | 23.6 | 22.7 | 12.9 | 24.6 | 5.4  | 1.2  | 0.2514 | 2.4 |
| 4/24/2018 14:24 | 21.9 | 19.2 | 13.9 | 21.8 | 10.1 | 1.3  | 0.3754 | 3   |
| 4/24/2018 14:25 | 19.7 | 18.8 | 11.9 | 21.8 | 11.7 | 1.5  | 0.3893 | 3.3 |
| 4/24/2018 14:26 | 18.1 | 18   | 11.1 | 21.2 | 11   | 1.7  | 0.3902 | 3.2 |
| 4/24/2018 14:27 | 17.2 | 17.2 | 11   | 20.2 | 11.1 | 2    | 0.3839 | 3.2 |
| 4/24/2018 14:28 | 15.3 | 10.2 | 7.3  | 14.6 | 28.1 | 14.3 | 0.5018 | 3.1 |
| 4/24/2018 14:29 | 11.6 | 5.7  | 6.1  | 11   | 38.8 | 28.5 | 0.7644 | 3.2 |
| 4/24/2018 14:30 | 6.8  | 1.4  | 5.2  | 10.3 | 46.6 | 37.4 | 1.2812 | 3.2 |
| 4/24/2018 14:31 | 3    | 1.8  | 5.7  | 10.4 | 49.9 | 39.9 | 1.5674 | 3.4 |
| 4/24/2018 14:32 | 1.2  | 0.9  | 4.1  | 10.6 | 50.1 | 39.1 | 1.7478 | 3.5 |
| 4/24/2018 14:33 | 0.5  | 0.5  | 7    | 10.8 | 49.3 | 39.1 | 1.8653 | 3.6 |
| 4/24/2018 14:34 | 0.4  | 0.5  | 5.4  | 10.5 | 48.6 | 39   | 1.8833 | 3.6 |
| 4/24/2018 14:35 | 0.4  | 0.2  | 5.4  | 10.4 | 47.5 | 38.9 | 1.9409 | 3.6 |
| 4/24/2018 14:36 | 0.4  | -0.1 | 6.9  | 10.2 | 47.2 | 38.7 | 1.9759 | 3.7 |
| 4/24/2018 14:37 | 0.4  | 0.8  | 5.8  | 10.6 | 46.4 | 38.5 | 2.0035 | 3.6 |
| 4/24/2018 14:38 | 0.3  | 0.6  | 5.5  | 10.1 | 45.5 | 38.2 | 2.0009 | 3.5 |
| 4/24/2018 14:39 | 0.3  | 0.5  | 5.8  | 9.9  | 44.7 | 37.8 | 1.9731 | 3.6 |
| 4/24/2018 14:40 | 0.3  | 0.9  | 3.7  | 9.9  | 44.3 | 37.3 | 2.0078 | 3.6 |
| 4/24/2018 14:41 | 0.3  | 0.7  | 5    | 9.8  | 44.3 | 36.8 | 2.008  | 3.7 |
| 4/24/2018 14:42 | 0.3  | 1.1  | 4.5  | 9.7  | 43.4 | 36.4 | 2.0043 | 3.7 |
| 4/24/2018 14:43 | 0.3  | 0.2  | 4.9  | 9.9  | 43   | 35.9 | 1.9934 | 3.8 |
| 4/24/2018 14:44 | 0.3  | 0.8  | 5.1  | 9.8  | 43.3 | 35.5 | 2.0043 | 3.8 |
| 4/24/2018 14:45 | 0.3  | 0.6  | 5.3  | 9.7  | 43.2 | 35.1 | 1.9956 | 4   |



|                 |     |      |     |     |      |      |        |     |
|-----------------|-----|------|-----|-----|------|------|--------|-----|
| 4/24/2018 14:46 | 0.3 | 0.7  | 4.3 | 9.5 | 43.1 | 34.8 | 1.9978 | 4   |
| 4/24/2018 14:47 | 0.3 | 0.7  | 5.7 | 9.7 | 42.4 | 34.5 | 1.9978 | 4.1 |
| 4/24/2018 14:48 | 0.3 | 0.4  | 4.6 | 9.7 | 41.9 | 34.1 | 1.965  | 4.1 |
| 4/24/2018 14:49 | 0.3 | 0.6  | 3.7 | 9.6 | 41.5 | 33.9 | 1.9591 | 4.2 |
| 4/24/2018 14:50 | 0.2 | 0.5  | 4.7 | 9.7 | 41.1 | 33.5 | 1.9423 | 4.3 |
| 4/24/2018 14:51 | 0.2 | 0.8  | 5.9 | 9.7 | 41   | 33.3 | 1.9557 | 4.3 |
| 4/24/2018 14:52 | 0.3 | 0.3  | 4   | 9.7 | 40.2 | 33   | 1.9183 | 4.3 |
| 4/24/2018 14:53 | 0.3 | 0.7  | 4.5 | 9.5 | 40.4 | 32.7 | 1.9195 | 4.3 |
| 4/24/2018 14:54 | 0.3 | 0.2  | 5.9 | 9.2 | 39.9 | 32.4 | 1.9136 | 4.2 |
| 4/24/2018 14:55 | 0.2 | 0.1  | 4.4 | 9.4 | 39.6 | 32   | 1.8954 | 4.3 |
| 4/24/2018 14:56 | 0.3 | 1    | 4.5 | 9.1 | 39   | 31.7 | 1.8646 | 4.3 |
| 4/24/2018 14:57 | 0.3 | 0.1  | 4.7 | 9.4 | 39.3 | 31.5 | 1.8903 | 4.2 |
| 4/24/2018 14:58 | 0.3 | 0.6  | 4.6 | 8.9 | 39   | 31.3 | 1.8894 | 4.1 |
| 4/24/2018 14:59 | 0.3 | 0.8  | 4.5 | 8.9 | 38.6 | 31   | 1.8754 | 4   |
| 4/24/2018 15:00 | 0.3 | 0.5  | 3.8 | 9.1 | 37.5 | 30.8 | 1.8169 | 4   |
| 4/24/2018 15:01 | 0.4 | 0.2  | 5.5 | 9   | 37.3 | 30.4 | 1.8119 | 4   |
| 4/24/2018 15:02 | 0.4 | 1.4  | 4.7 | 9   | 36.6 | 30   | 1.7794 | 4   |
| 4/24/2018 15:03 | 0.3 | 0.9  | 4.7 | 9   | 37.6 | 29.8 | 1.8533 | 4.2 |
| 4/24/2018 15:04 | 0.3 | 0.4  | 3.9 | 9   | 36.9 | 29.6 | 1.8064 | 4.2 |
| 4/24/2018 15:05 | 0.2 | 0.2  | 3.8 | 8.6 | 37.1 | 29.5 | 1.8308 | 4.3 |
| 4/24/2018 15:06 | 0.3 | 0.3  | 4.5 | 8.7 | 36.2 | 29.1 | 1.7769 | 4.3 |
| 4/24/2018 15:07 | 0.2 | -0.1 | 4.2 | 8.8 | 36.2 | 28.8 | 1.7988 | 4.3 |
| 4/24/2018 15:08 | 0.2 | 0.8  | 3.8 | 8.9 | 35.8 | 28.7 | 1.7853 | 4.3 |
| 4/24/2018 15:09 | 0.2 | 0.4  | 4.1 | 8.7 | 35.1 | 28.4 | 1.7437 | 4.3 |
| 4/24/2018 15:10 | 0.3 | 0.9  | 3.6 | 8.5 | 35.4 | 28.3 | 1.7795 | 4.3 |
| 4/24/2018 15:11 | 0.3 | 1    | 3.4 | 8.6 | 35   | 28.1 | 1.7523 | 4.3 |
| 4/24/2018 15:12 | 0.3 | 0.3  | 4.1 | 8.6 | 35   | 27.9 | 1.772  | 4.3 |
| 4/24/2018 15:13 | 0.3 | 0.2  | 3.7 | 8.7 | 34.9 | 27.8 | 1.7683 | 4.2 |
| 4/24/2018 15:14 | 0.3 | 0.8  | 4.2 | 8.4 | 34.7 | 27.6 | 1.7672 | 4.2 |
| 4/24/2018 15:15 | 0.3 | 1.3  | 5   | 8.6 | 33.6 | 27.4 | 1.7145 | 4.1 |
| 4/24/2018 15:16 | 0.3 | 0.9  | 4.7 | 8.7 | 32.8 | 27.1 | 1.6685 | 4.1 |
| 4/24/2018 15:17 | 0.4 | 0.7  | 3.6 | 8.7 | 31.6 | 26.7 | 1.6117 | 4.1 |
| 4/24/2018 15:18 | 0.5 | 0.8  | 4.6 | 8.5 | 29.9 | 26.3 | 1.581  | 4   |
| 4/24/2018 15:19 | 0.6 | 0.9  | 3.9 | 8.9 | 28.9 | 25.6 | 1.496  | 3.9 |
| 4/24/2018 15:20 | 0.7 | 1.1  | 4.4 | 8.4 | 28.1 | 24.9 | 1.4913 | 3.9 |
| 4/24/2018 15:21 | 0.8 | 0.6  | 3   | 8.5 | 27.8 | 24.1 | 1.4773 | 4   |
| 4/24/2018 15:22 | 0.8 | 1.3  | 2.8 | 8.7 | 28.4 | 23.4 | 1.5002 | 4   |
| 4/24/2018 15:23 | 0.7 | 1.3  | 5.1 | 8.3 | 29.2 | 22.9 | 1.5725 | 4   |
| 4/24/2018 15:24 | 0.7 | 0.4  | 5.3 | 7.9 | 30.2 | 22.6 | 1.591  | 4.1 |
| 4/24/2018 15:25 | 0.6 | 0.8  | 4.9 | 8.2 | 29.5 | 22.4 | 1.5685 | 4.1 |
| 4/24/2018 15:26 | 0.5 | 0.9  | 4.4 | 8.1 | 30.1 | 22.3 | 1.6147 | 4.2 |
| 4/24/2018 15:27 | 0.5 | 1.3  | 2.9 | 8.2 | 29.2 | 22.4 | 1.5895 | 4.2 |
| 4/24/2018 15:28 | 0.4 | 0.5  | 4.5 | 8.2 | 29.5 | 22.6 | 1.625  | 4.2 |
| 4/24/2018 15:29 | 0.4 | 1.4  | 4   | 8.1 | 28.6 | 22.8 | 1.5673 | 4.2 |
| 4/24/2018 15:30 | 0.4 | 0.7  | 3.9 | 8   | 29.5 | 23   | 1.6133 | 4.2 |
| 4/24/2018 15:31 | 0.4 | 0.9  | 2.6 | 8   | 29.2 | 23.2 | 1.6045 | 4.3 |
| 4/24/2018 15:32 | 0.4 | 0.7  | 4.4 | 8.1 | 30.1 | 23.2 | 1.6183 | 4.3 |

|                 |     |     |      |      |      |      |        |     |
|-----------------|-----|-----|------|------|------|------|--------|-----|
| 4/24/2018 15:33 | 0.4 | 0.3 | 3.9  | 7.9  | 30   | 23.3 | 1.6277 | 4.3 |
| 4/24/2018 15:34 | 0.3 | 0.9 | 4.3  | 8    | 30.1 | 23.4 | 1.6218 | 4.2 |
| 4/24/2018 15:35 | 0.3 | 0.6 | 3.6  | 7.9  | 29.4 | 23.4 | 1.6142 | 4.2 |
| 4/24/2018 15:36 | 0.3 | 0.8 | 3.8  | 8.3  | 29   | 23.4 | 1.5858 | 4.1 |
| 4/24/2018 15:37 | 0.3 | 0.9 | 4.4  | 7.8  | 28.9 | 23.4 | 1.6027 | 4.1 |
| 4/24/2018 15:38 | 0.6 | 3.2 | 12.2 | 11.2 | 28.4 | 23.4 | 1.4465 | 4   |
| 4/24/2018 15:39 | 3.2 | 6.8 | 6.2  | 11.2 | 26.9 | 23.3 | 1.5352 | 4   |

## USFS Missoula Chamber 2019

| Date&Time      | O3 NO-CL | O3 SL-UV | O3 UV-C | O3 UV-G | NO2-C  | NO      | CO     | THC    |
|----------------|----------|----------|---------|---------|--------|---------|--------|--------|
| 4/15/2019 0:00 | 2.4      | 4.7      | 3.7733  | 2.1833  | 3.2565 | 17.5546 | 0.0557 | 1.7849 |
| 4/15/2019 0:01 | 2.4      | 4.7583   | 3.8427  | 2.1667  | 3.2661 | 17.7182 | 0.0698 | 1.7802 |
| 4/15/2019 0:02 | 2.4      | 4.7083   | 3.6295  | 1.65    | 3.2456 | 17.8667 | 0.0599 | 1.799  |
| 4/15/2019 0:03 | 2.4      | 5.1833   | 3.4703  | 2.3167  | 3.2587 | 17.7    | 0.0623 | 1.8106 |
| 4/15/2019 0:04 | 2.4      | 5.1333   | 3.8818  | 2.4333  | 3.2955 | 17.85   | 0.0675 | 1.7982 |
| 4/15/2019 0:05 | 2.4417   | 5        | 4.0138  | 2.2667  | 3.2715 | 18.1909 | 0.0509 | 1.7999 |
| 4/15/2019 0:06 | 2.5      | 4.1417   | 3.8568  | 1.7667  | 3.2659 | 18.41   | 0.0701 | 1.8183 |
| 4/15/2019 0:07 | 2.5      | 5.3      | 3.8643  | 2.2333  | 3.2708 | 18.5083 | 0.063  | 1.82   |
| 4/15/2019 0:08 | 2.4333   | 4.7167   | 3.9288  | 1.8667  | 3.2872 | 18.675  | 0.0653 | 1.8107 |
| 4/15/2019 0:09 | 2.4667   | 4.05     | 3.7363  | 1.8167  | 3.2938 | 18.525  | 0.0621 | 1.7904 |
| 4/15/2019 0:10 | 2.475    | 4.9833   | 3.9782  | 1.7833  | 3.2595 | 18.4182 | 0.0541 | 1.7946 |
| 4/15/2019 0:11 | 2.5      | 4.9083   | 3.814   | 2.75    | 3.2678 | 18.2182 | 0.0691 | 1.8343 |
| 4/15/2019 0:12 | 2.475    | 4.4417   | 3.8643  | 2.1667  | 3.2486 | 18.2833 | 0.056  | 1.8114 |
| 4/15/2019 0:13 | 2.4417   | 4.6      | 3.5945  | 2.15    | 3.2611 | 17.8727 | 0.0595 | 1.8232 |
| 4/15/2019 0:14 | 2.45     | 5.1917   | 3.9043  | 2.1333  | 3.2624 | 17.925  | 0.0702 | 1.8002 |
| 4/15/2019 0:15 | 2.475    | 4.2917   | 3.9752  | 2.45    | 3.2576 | 18.1818 | 0.0522 | 1.7944 |
| 4/15/2019 0:16 | 2.475    | 4.425    | 3.9165  | 1.75    | 3.2449 | 18.375  | 0.0683 | 1.781  |
| 4/15/2019 0:17 | 2.4667   | 4.875    | 3.8983  | 2.1     | 3.2184 | 18.3    | 0.0608 | 1.8131 |
| 4/15/2019 0:18 | 2.425    | 4.8917   | 3.5923  | 2.1167  | 3.2395 | 18.375  | 0.0607 | 1.8185 |
| 4/15/2019 0:19 | 2.475    | 4.9417   | 3.6193  | 2.2333  | 3.2321 | 18.49   | 0.065  | 1.8243 |
| 4/15/2019 0:20 | 2.4      | 4.925    | 3.7988  | 1.9667  | 3.2249 | 18.6091 | 0.0497 | 1.8206 |
| 4/15/2019 0:21 | 2.4      | 5.3167   | 3.827   | 2.1     | 3.214  | 18.7818 | 0.0624 | 1.8166 |
| 4/15/2019 0:22 | 2.4      | 4.3167   | 3.8112  | 2.0167  | 3.2145 | 18.9583 | 0.0557 | 1.8248 |
| 4/15/2019 0:23 | 2.4      | 4.7      | 3.6075  | 1.75    | 3.2496 | 19.0636 | 0.0653 | 1.8288 |
| 4/15/2019 0:24 | 2.3417   | 3.6333   | 4.0207  | 2.2167  | 3.2478 | 19.3583 | 0.0676 | 1.7988 |
| 4/15/2019 0:25 | 2.3083   | 4.9583   | 3.9507  | 1.7333  | 3.2603 | 19.7091 | 0.0525 | 1.7998 |
| 4/15/2019 0:26 | 2.325    | 5.0917   | 3.629   | 2.3333  | 3.2933 | 19.9    | 0.0636 | 1.8003 |
| 4/15/2019 0:27 | 2.4      | 5.6833   | 3.5235  | 2.0667  | 3.3088 | 19.8818 | 0.057  | 1.8133 |
| 4/15/2019 0:28 | 2.35     | 4.8083   | 3.5117  | 2.1667  | 3.296  | 19.8    | 0.0677 | 1.8057 |
| 4/15/2019 0:29 | 2.3      | 5.4083   | 3.9522  | 1.5     | 3.2935 | 19.87   | 0.066  | 1.8148 |
| 4/15/2019 0:30 | 2.3      | 5.2667   | 3.7313  | 1.8667  | 3.3302 | 19.9727 | 0.0545 | 1.8195 |
| 4/15/2019 0:31 | 2.3083   | 5.2667   | 3.4115  | 2.0167  | 3.3258 | 19.9636 | 0.0604 | 1.8263 |
| 4/15/2019 0:32 | 2.35     | 4.95     | 3.5447  | 1.7833  | 3.3519 | 19.8    | 0.0564 | 1.8359 |
| 4/15/2019 0:33 | 2.4      | 4.825    | 3.749   | 2.4333  | 3.3817 | 19.7083 | 0.0592 | 1.8154 |
| 4/15/2019 0:34 | 2.4      | 4.3167   | 3.5483  | 1.9333  | 3.3951 | 19.7    | 0.063  | 1.8162 |
| 4/15/2019 0:35 | 2.375    | 4.7667   | 3.7728  | 2.05    | 3.3491 | 19.7667 | 0.0523 | 1.8214 |
| 4/15/2019 0:36 | 2.2833   | 4.825    | 3.5052  | 1.65    | 3.3311 | 19.7    | 0.0695 | 1.7908 |
| 4/15/2019 0:37 | 2.1333   | 4.4083   | 3.1095  | 2.1     | 3.3208 | 19.7455 | 0.0617 | 1.8116 |
| 4/15/2019 0:38 | 2.0833   | 4.65     | 3.6687  | 2.3     | 3.3579 | 19.67   | 0.0583 | 1.8163 |
| 4/15/2019 0:39 | 2.0333   | 4.35     | 3.4013  | 1.8     | 3.3424 | 19.6    | 0.0631 | 1.824  |
| 4/15/2019 0:40 | 2.0833   | 4.6417   | 3.6363  | 1.6833  | 3.3717 | 19.7    | 0.0481 | 1.8099 |
| 4/15/2019 0:41 | 2.1333   | 4.65     | 3.4842  | 2.2333  | 3.3888 | 19.7    | 0.0658 | 1.8015 |
| 4/15/2019 0:42 | 2.2      | 5.2917   | 3.501   | 1.3167  | 3.3858 | 19.7    | 0.056  | 1.798  |
| 4/15/2019 0:43 | 2.1417   | 4.35     | 3.4145  | 1.45    | 3.3491 | 19.7    | 0.0636 | 1.8002 |
| 4/15/2019 0:44 | 2.125    | 5.0167   | 3.409   | 2.1167  | 3.3613 | 19.7727 | 0.0632 | 1.8098 |

|                |        |        |        |        |        |         |        |        |
|----------------|--------|--------|--------|--------|--------|---------|--------|--------|
| 4/15/2019 0:45 | 2.0917 | 4.475  | 3.2573 | 1.5833 | 3.3714 | 19.8091 | 0.0502 | 1.8226 |
| 4/15/2019 0:46 | 2.0417 | 4.5333 | 3.2767 | 1.3333 | 3.39   | 19.85   | 0.0673 | 1.808  |
| 4/15/2019 0:47 | 2.0833 | 5.15   | 3.5482 | 1.7    | 3.4208 | 19.9    | 0.0587 | 1.7947 |
| 4/15/2019 0:48 | 2.1    | 3.4917 | 3.1318 | 1.5667 | 3.4    | 20      | 0.0579 | 1.8058 |
| 4/15/2019 0:49 | 2.1    | 3.7917 | 3.0857 | 1.8667 | 3.4153 | 20.1    | 0.0616 | 1.8078 |
| 4/15/2019 0:50 | 2.1    | 4.45   | 3.0978 | 1.6667 | 3.4065 | 20.1727 | 0.049  | 1.8167 |
| 4/15/2019 0:51 | 2.0917 | 4.45   | 3.303  | 1.05   | 3.4348 | 20.2    | 0.0626 | 1.815  |
| 4/15/2019 0:52 | 2.0083 | 4.1833 | 3.2258 | 1.2333 | 3.4319 | 20.2333 | 0.0568 | 1.8234 |
| 4/15/2019 0:53 | 2      | 4.425  | 3.113  | 1.3333 | 3.4146 | 20.2546 | 0.0573 | 1.8363 |
| 4/15/2019 0:54 | 2      | 4.9417 | 3.4564 | 1.2333 | 3.4381 | 20.2182 | 0.064  | 1.8257 |
| 4/15/2019 0:55 | 2      | 4.2417 | 3.2129 | 1.45   | 3.4237 | 20.29   | 0.0526 | 1.8059 |
| 4/15/2019 0:56 | 2      | 3.875  | 3.3409 | 1.5167 | 3.476  | 20.2    | 0.0638 | 1.7754 |
| 4/15/2019 0:57 | 2      | 4.8333 | 3.4243 | 1.4833 | 3.4265 | 20.2333 | 0.0531 | 1.7795 |
| 4/15/2019 0:58 | 2      | 3.7167 | 3.1148 | 1.75   | 3.4495 | 20.3    | 0.0616 | 1.8232 |
| 4/15/2019 0:59 | 1.9667 | 4.025  | 3.3608 | 0.7    | 3.4656 | 20.2417 | 0.0639 | 1.8178 |
| 4/15/2019 1:00 | 1.9    | 4.0917 | 3.0713 | 1.5167 | 3.4253 | 20.2    | 0.0502 | 1.8329 |
| 4/15/2019 1:01 | 1.9083 | 4.4667 | 3.1968 | 1.8833 | 3.4765 | 20.2    | 0.058  | 1.82   |
| 4/15/2019 1:02 | 1.9667 | 4.0667 | 3.2523 | 1.4333 | 3.4937 | 20.2    | 0.0562 | 1.7973 |
| 4/15/2019 1:03 | 2      | 4.0417 | 3.1863 | 1.7    | 3.4873 | 20.2167 | 0.0524 | 1.8108 |
| 4/15/2019 1:04 | 2      | 4.55   | 3.443  | 2.0667 | 3.4366 | 20.3    | 0.0653 | 1.8249 |
| 4/15/2019 1:05 | 2      | 4.9167 | 3.5262 | 1.4167 | 3.465  | 20.3455 | 0.0539 | 1.8088 |
| 4/15/2019 1:06 | 2      | 4.1833 | 3.1218 | 1.4    | 3.4623 | 20.4    | 0.0629 | 1.8317 |
| 4/15/2019 1:07 | 2      | 4.3667 | 3.2769 | 1.9167 | 3.5003 | 20.4    | 0.0567 | 1.806  |
| 4/15/2019 1:08 | 2      | 4.5583 | 3.2698 | 1.0833 | 3.4448 | 20.4    | 0.0528 | 1.8079 |
| 4/15/2019 1:09 | 1.9417 | 4.6    | 3.0595 | 1.8667 | 3.4931 | 20.4    | 0.0626 | 1.8232 |
| 4/15/2019 1:10 | 1.9    | 3.95   | 3.385  | 2.0667 | 3.5033 | 20.5    | 0.0524 | 1.8093 |
| 4/15/2019 1:11 | 1.9    | 4.8583 | 3.2395 | 1.7167 | 3.5061 | 20.4667 | 0.0671 | 1.8226 |
| 4/15/2019 1:12 | 1.9    | 4.4667 | 3.0508 | 1.45   | 3.5048 | 19.7667 | 0.0625 | 1.8069 |
| 4/15/2019 1:13 | 1.9    | 3.9    | 3.1068 | 1.05   | 3.4797 | 18.81   | 0.0496 | 1.8058 |
| 4/15/2019 1:14 | 1.9    | 4.3333 | 3.191  | 1.0167 | 3.5169 | 17.7636 | 0.0673 | 1.7892 |
| 4/15/2019 1:15 | 1.85   | 4.3833 | 3.1741 | 1.4667 | 3.5323 | 17.6    | 0.0522 | 1.8165 |
| 4/15/2019 1:16 | 1.8917 | 4.4083 | 3.4669 | 1.7167 | 3.5284 | 17.5583 | 0.0626 | 1.8163 |
| 4/15/2019 1:17 | 1.825  | 4.3667 | 3.2136 | 1.35   | 3.5007 | 17.5273 | 0.0589 | 1.8052 |
| 4/15/2019 1:18 | 1.8    | 3.5583 | 2.9842 | 1.9167 | 3.4986 | 17.5    | 0.0481 | 1.7965 |
| 4/15/2019 1:19 | 1.8    | 4.3833 | 3.2616 | 1.4167 | 3.5252 | 16.8909 | 0.0598 | 1.7902 |
| 4/15/2019 1:20 | 1.8    | 5.1667 | 3.1624 | 1.6    | 3.5188 | 16.175  | 0.0532 | 1.7565 |
| 4/15/2019 1:21 | 1.8    | 4.4333 | 3.4567 | 2      | 3.5424 | 16.1    | 0.0539 | 1.8091 |
| 4/15/2019 1:22 | 1.8    | 4.5333 | 3.4062 | 1.4333 | 3.536  | 16.0167 | 0.0577 | 1.8391 |
| 4/15/2019 1:23 | 1.8833 | 4.35   | 3.2406 | 1.55   | 3.5355 | 16      | 0.0519 | 1.8194 |
| 4/15/2019 1:24 | 1.85   | 4.7583 | 3.1531 | 1.3167 | 3.4948 | 16.5    | 0.065  | 1.802  |
| 4/15/2019 1:25 | 1.8    | 4.3583 | 3.2963 | 1.75   | 3.506  | 17.2455 | 0.0521 | 1.7943 |
| 4/15/2019 1:26 | 1.8    | 4.2333 | 3.299  | 0.9667 | 3.5288 | 18.35   | 0.0525 | 1.7979 |
| 4/15/2019 1:27 | 1.8167 | 3.775  | 3.5092 | 1.2667 | 3.5071 | 18.625  | 0.0656 | 1.8044 |
| 4/15/2019 1:28 | 1.8083 | 3.95   | 2.9667 | 1.75   | 3.5293 | 18.5364 | 0.0525 | 1.7927 |
| 4/15/2019 1:29 | 1.8    | 4.575  | 3.1106 | 1.4333 | 3.4873 | 18.5182 | 0.0623 | 1.7834 |
| 4/15/2019 1:30 | 1.8    | 4.25   | 2.887  | 1.2167 | 3.4902 | 18.3091 | 0.0578 | 1.8176 |
| 4/15/2019 1:31 | 1.8    | 3.6667 | 3.1344 | 1.3333 | 3.4748 | 18.3667 | 0.055  | 1.8044 |

|                |        |        |        |        |        |         |        |        |
|----------------|--------|--------|--------|--------|--------|---------|--------|--------|
| 4/15/2019 1:32 | 1.8    | 5.0417 | 3.2507 | 1.6    | 3.5074 | 18.0727 | 0.0621 | 1.7969 |
| 4/15/2019 1:33 | 1.8    | 4.25   | 3.2233 | 1.7167 | 3.5113 | 17.53   | 0.0472 | 1.8168 |
| 4/15/2019 1:34 | 1.8083 | 4.2417 | 3.1158 | 1.1    | 3.5083 | 17.5    | 0.063  | 1.816  |
| 4/15/2019 1:35 | 1.875  | 3.875  | 3.0391 | 1.3667 | 3.5372 | 17.475  | 0.0582 | 1.8155 |
| 4/15/2019 1:36 | 1.9    | 3.875  | 2.9221 | 1.0333 | 3.5862 | 17.4455 | 0.0551 | 1.8214 |
| 4/15/2019 1:37 | 1.9583 | 4.8667 | 2.8566 | 1.0667 | 3.5572 | 17.5818 | 0.0661 | 1.8367 |
| 4/15/2019 1:38 | 1.9    | 4.75   | 2.9471 | 1.5833 | 3.5678 | 17.5273 | 0.052  | 1.8373 |
| 4/15/2019 1:39 | 1.9    | 4.1583 | 3.0837 | 1.55   | 3.5489 | 17.53   | 0.0651 | 1.8285 |
| 4/15/2019 1:40 | 1.9    | 3.525  | 3.1653 | 0.95   | 3.5392 | 17.3333 | 0.0555 | 1.8251 |
| 4/15/2019 1:41 | 1.825  | 4.0917 | 2.802  | 1.2    | 3.5523 | 17.1    | 0.0618 | 1.8388 |
| 4/15/2019 1:42 | 1.8    | 4.2417 | 3.0267 | 0.9    | 3.6279 | 17.1909 | 0.0582 | 1.8143 |
| 4/15/2019 1:43 | 1.8    | 4.3917 | 2.8441 | 1.2833 | 3.6251 | 17.3273 | 0.0522 | 1.8294 |
| 4/15/2019 1:44 | 1.8417 | 4.425  | 3.0998 | 1.4833 | 3.6707 | 17.7    | 0.0615 | 1.8115 |
| 4/15/2019 1:45 | 1.825  | 4.3583 | 2.8853 | 0.9167 | 3.6655 | 17.9444 | 0.0612 | 1.8044 |
| 4/15/2019 1:46 | 1.8417 | 4.25   | 2.9361 | 1.7    | 3.6554 | 17.725  | 0.0524 | 1.827  |
| 4/15/2019 1:47 | 1.8    | 4.375  | 3.2526 | 1.5667 | 3.7278 | 17.35   | 0.0656 | 1.8135 |
| 4/15/2019 1:48 | 1.8    | 4.4167 | 3.0965 | 1.35   | 3.7074 | 17.2455 | 0.0529 | 1.8235 |
| 4/15/2019 1:49 | 1.8    | 3.6917 | 2.8785 | 1.3667 | 3.7068 | 17      | 0.0611 | 1.8152 |
| 4/15/2019 1:50 | 1.8    | 4.125  | 3.1533 | 0.85   | 3.7029 | 17.075  | 0.0556 | 1.8185 |
| 4/15/2019 1:51 | 1.8    | 4.4167 | 3.056  | 0.9333 | 3.708  | 17.08   | 0.0583 | 1.8273 |
| 4/15/2019 1:52 | 1.7167 | 4.5167 | 3.1783 | 1.45   | 3.7223 | 17.0182 | 0.0617 | 1.8343 |
| 4/15/2019 1:53 | 1.7    | 3.9083 | 3.0804 | 1.3    | 3.6832 | 16.3    | 0.0547 | 1.8379 |
| 4/15/2019 1:54 | 1.6917 | 4.1583 | 2.9912 | 1.4667 | 3.6772 | 15.1125 | 0.0625 | 1.8326 |
| 4/15/2019 1:55 | 1.6833 | 4.65   | 3.1128 | 1.4    | 3.7273 | 13.85   | 0.0601 | 1.7983 |
| 4/15/2019 1:56 | 1.7    | 4.3167 | 3.2401 | 0.9167 | 3.7551 | 12.9    | 0.0577 | 1.7943 |
| 4/15/2019 1:57 | 1.6833 | 4.125  | 2.9727 | 1.4333 | 3.6918 | 12.18   | 0.0666 | 1.8199 |
| 4/15/2019 1:58 | 1.6167 | 4.425  | 2.8612 | 1.4167 | 3.7238 | 11.0818 | 0.0518 | 1.8321 |
| 4/15/2019 1:59 | 1.6    | 4.0333 | 2.9156 | 1.45   | 3.6993 | 10.29   | 0.0653 | 1.8401 |
| 4/15/2019 2:00 | 1.675  | 4.7333 | 2.9679 | 1.5833 | 3.6878 | 9.1364  | 0.0577 | 1.7984 |
| 4/15/2019 2:01 | 1.7    | 4.0667 | 3.2576 | 0.6667 | 3.6733 | 8.7556  | 0.0603 | 1.7922 |
| 4/15/2019 2:02 | 1.7    | 3.675  | 2.9623 | 0.9    | 3.6443 | 7.8818  | 0.062  | 1.8148 |
| 4/15/2019 2:03 | 1.7    | 4.325  | 3.0167 | 0.9333 | 3.6423 | 7.02    | 0.0437 | 1.7826 |
| 4/15/2019 2:04 | 1.7    | 4.1    | 2.7146 | 1.0167 | 3.6377 | 6.5818  | 0.0576 | 1.7916 |
| 4/15/2019 2:05 | 1.7727 | 4.025  | 2.748  | 1.3167 | 3.6343 | 6.3167  | 0.0505 | 1.8038 |
| 4/15/2019 2:06 | 1.7667 | 4.225  | 2.7498 | 1.1667 | 3.6118 | 6.1083  | 0.044  | 1.7629 |
| 4/15/2019 2:07 | 1.7583 | 4.6    | 2.8488 | 1.75   | 3.6178 | 5.8083  | 0.0523 | 1.7578 |
| 4/15/2019 2:08 | 1.8    | 4.0833 | 2.7777 | 1.2333 | 3.5848 | 5.7     | 0.0416 | 1.7567 |
| 4/15/2019 2:09 | 1.8    | 4.4417 | 2.9934 | 0.8    | 3.5873 | 5.55    | 0.0495 | 1.7427 |
| 4/15/2019 2:10 | 1.8    | 4.775  | 2.9339 | 1.0667 | 3.5771 | 6.075   | 0.0468 | 1.7427 |
| 4/15/2019 2:11 | 1.8083 | 4.0167 | 3.0387 | 1.9833 | 3.5571 | 6.8273  | 0.0373 | 1.7534 |
| 4/15/2019 2:12 | 1.8833 | 4.4667 | 3.1523 | 1.3333 | 3.5638 | 7.1667  | 0.0524 | 1.7343 |
| 4/15/2019 2:13 | 1.9    | 3.9083 | 3.0411 | 1.55   | 3.5798 | 6.94    | 0.0324 | 1.7119 |
| 4/15/2019 2:14 | 1.9917 | 4.65   | 3.3962 | 1.0167 | 3.6076 | 7.0583  | 0.0396 | 1.7339 |
| 4/15/2019 2:15 | 2.0167 | 4.55   | 3.2805 | 1.0167 | 3.6022 | 7.4636  | 0.0486 | 1.7234 |
| 4/15/2019 2:16 | 2.0917 | 4.5833 | 3.2213 | 1.2167 | 3.6113 | 7.47    | 0.0361 | 1.7444 |
| 4/15/2019 2:17 | 2.0333 | 4.3667 | 3.1075 | 1.8    | 3.6449 | 7.95    | 0.0494 | 1.7252 |
| 4/15/2019 2:18 | 2.05   | 4.125  | 3.1434 | 1.6667 | 3.6332 | 8.8818  | 0.0418 | 1.718  |

|                |        |        |        |        |        |         |        |        |
|----------------|--------|--------|--------|--------|--------|---------|--------|--------|
| 4/15/2019 2:19 | 1.9667 | 3.8833 | 2.9053 | 2.0333 | 3.5979 | 10.0909 | 0.0348 | 1.7422 |
| 4/15/2019 2:20 | 1.8917 | 4.175  | 3.279  | 1.3333 | 3.5661 | 11.2    | 0.0478 | 1.741  |
| 4/15/2019 2:21 | 1.85   | 3.7667 | 3.3576 | 1.3333 | 3.6129 | 12.3364 | 0.0412 | 1.7466 |
| 4/15/2019 2:22 | 1.9833 | 4.3583 | 2.9962 | 1.2667 | 3.6223 | 12.6091 | 0.0469 | 1.7363 |
| 4/15/2019 2:23 | 2      | 4.9833 | 3.1518 | 1.4333 | 3.623  | 12.9091 | 0.0459 | 1.7411 |
| 4/15/2019 2:24 | 2      | 4.425  | 3.1718 | 1.6333 | 3.623  | 13.47   | 0.0381 | 1.7948 |
| 4/15/2019 2:25 | 2      | 4.275  | 3.205  | 1.4    | 3.6081 | 14.46   | 0.0534 | 1.7954 |
| 4/15/2019 2:26 | 2      | 3.65   | 3.4793 | 1.0333 | 3.6045 | 14.125  | 0.0446 | 1.8115 |
| 4/15/2019 2:27 | 2      | 4.0167 | 3.2542 | 0.9167 | 3.5842 | 14.2    | 0.0567 | 1.8028 |
| 4/15/2019 2:28 | 2      | 4.5667 | 3.0375 | 1.8    | 3.5998 | 14.3556 | 0.0426 | 1.7903 |
| 4/15/2019 2:29 | 1.9583 | 4.25   | 3.0392 | 1.1333 | 3.588  | 14.65   | 0.0436 | 1.8027 |
| 4/15/2019 2:30 | 2.0083 | 5.1583 | 3.4632 | 0.9833 | 3.5873 | 14.2455 | 0.0517 | 1.8028 |
| 4/15/2019 2:31 | 2      | 4.0917 | 2.542  | 1.5833 | 3.5831 | 13.8    | 0.0443 | 1.814  |
| 4/15/2019 2:32 | 2.075  | 4.4917 | 3.2913 | 1.35   | 3.5878 | 13.7364 | 0.0542 | 1.7979 |
| 4/15/2019 2:33 | 2.1    | 4.4167 | 3.0928 | 1.25   | 3.6047 | 13.1909 | 0.0526 | 1.7773 |
| 4/15/2019 2:34 | 2.1    | 4.3167 | 3.0547 | 1.4333 | 3.5913 | 13.6917 | 0.0449 | 1.7757 |
| 4/15/2019 2:35 | 2.1333 | 3.9333 | 2.9188 | 1.8667 | 3.6072 | 13.8    | 0.0593 | 1.7614 |
| 4/15/2019 2:36 | 2.1    | 4.0083 | 3.2018 | 1.7833 | 3.5918 | 13.4    | 0.0513 | 1.7972 |
| 4/15/2019 2:37 | 2.1    | 4.9083 | 3.306  | 1.4667 | 3.5831 | 12.9667 | 0.0693 | 1.8082 |
| 4/15/2019 2:38 | 2.1167 | 4.4333 | 3.3672 | 1.3333 | 3.5907 | 12.6455 | 0.0596 | 1.7861 |
| 4/15/2019 2:39 | 2.1583 | 4.7667 | 3.453  | 1.9    | 3.5625 | 12.125  | 0.0509 | 1.7938 |
| 4/15/2019 2:40 | 2.2583 | 4.4583 | 3.2427 | 1.5833 | 3.5893 | 11.96   | 0.0615 | 1.7997 |
| 4/15/2019 2:41 | 2.225  | 3.625  | 3.2532 | 1.8333 | 3.5543 | 11.5    | 0.0492 | 1.7866 |
| 4/15/2019 2:42 | 2.3    | 4.6583 | 3.3203 | 1.7833 | 3.5749 | 11.78   | 0.0618 | 1.8067 |
| 4/15/2019 2:43 | 2.2417 | 4.15   | 3.0685 | 1.6    | 3.576  | 11.9833 | 0.0565 | 1.8191 |
| 4/15/2019 2:44 | 2.2    | 4.1083 | 2.9682 | 1.8    | 3.5589 | 11.79   | 0.0471 | 1.829  |
| 4/15/2019 2:45 | 2.1583 | 4.5667 | 3.3023 | 1.55   | 3.5758 | 12.4636 | 0.0672 | 1.8033 |
| 4/15/2019 2:46 | 2.15   | 4.7833 | 3.4245 | 1.6333 | 3.5608 | 12.5455 | 0.0551 | 1.793  |
| 4/15/2019 2:47 | 2.2    | 4.4417 | 3.136  | 1.3333 | 3.5573 | 11.69   | 0.0633 | 1.8199 |
| 4/15/2019 2:48 | 2.1833 | 4.4583 | 3.158  | 1.7333 | 3.5232 | 10.725  | 0.0623 | 1.8333 |
| 4/15/2019 2:49 | 2.1583 | 4.8167 | 2.9063 | 1.8833 | 3.5479 | 9.78    | 0.0478 | 1.8177 |
| 4/15/2019 2:50 | 2.125  | 3.8333 | 3.108  | 1.4167 | 3.5335 | 9.1     | 0.0673 | 1.8449 |
| 4/15/2019 2:51 | 2.1917 | 4.4333 | 3.346  | 2.1333 | 3.5186 | 9.01    | 0.0487 | 1.8217 |
| 4/15/2019 2:52 | 2.1    | 4.2917 | 3.2235 | 1.3    | 3.4982 | 8.1273  | 0.0604 | 1.8098 |
| 4/15/2019 2:53 | 2.1    | 4.025  | 2.8755 | 1.25   | 3.4855 | 7.2875  | 0.065  | 1.801  |
| 4/15/2019 2:54 | 2.1    | 4.7333 | 3.7923 | 1.2667 | 3.4888 | 6.1889  | 0.0544 | 1.8045 |
| 4/15/2019 2:55 | 2.1    | 4.5    | 3.2168 | 1.05   | 3.4637 | 5.2455  | 0.0565 | 1.8033 |
| 4/15/2019 2:56 | 2.1167 | 4.4833 | 3.4298 | 1.65   | 3.4698 | 4.54    | 0.0492 | 1.8346 |
| 4/15/2019 2:57 | 2.1083 | 4.6833 | 2.9355 | 1.9167 | 3.4532 | 3.2     | 0.0598 | 1.8189 |
| 4/15/2019 2:58 | 2.15   | 4.225  | 3.0493 | 2.2833 | 3.4636 | 1.9     | 0.0603 | 1.7895 |
| 4/15/2019 2:59 | 2.1583 | 4.4917 | 3.1107 | 1.9833 | 3.4626 | 1.475   | 0.0469 | 1.8211 |
| 4/15/2019 3:00 | 2.1    | 4.4667 | 3.3727 | 1.6833 | 3.4546 | 1.5     | 0.0561 | 1.8353 |
| 4/15/2019 3:01 | 2.1083 | 4.5167 | 3.1405 | 1.6833 | 3.4316 | 1.5     | 0.0501 | 1.7978 |
| 4/15/2019 3:02 | 2.1333 | 3.9167 | 3.6897 | 1.2833 | 3.4251 | 1.5     | 0.0572 | 1.81   |
| 4/15/2019 3:03 | 2.2    | 4.675  | 3.7397 | 2.0333 | 3.4186 | 1.5     | 0.0515 | 1.8156 |
| 4/15/2019 3:04 | 2.2667 | 4.625  | 3.7815 | 2.6333 | 3.3956 | 1.5     | 0.0439 | 1.808  |
| 4/15/2019 3:05 | 2.3083 | 4.6583 | 3.4962 | 2.25   | 3.3861 | 1.5     | 0.0612 | 1.8087 |

|                |        |        |        |        |        |        |        |        |
|----------------|--------|--------|--------|--------|--------|--------|--------|--------|
| 4/15/2019 3:06 | 2.3083 | 4.25   | 3.5843 | 2.1167 | 3.3691 | 1.4    | 0.0463 | 1.7969 |
| 4/15/2019 3:07 | 2.3083 | 4.625  | 3.4403 | 2.65   | 3.3566 | 1.4182 | 0.0558 | 1.7952 |
| 4/15/2019 3:08 | 2.4667 | 4.9833 | 3.865  | 2.6167 | 3.3473 | 1.4909 | 0.0544 | 1.7788 |
| 4/15/2019 3:09 | 2.5    | 4.375  | 3.5323 | 2.1    | 3.3749 | 1.4    | 0.0363 | 1.8168 |
| 4/15/2019 3:10 | 2.4083 | 4.35   | 3.2795 | 1.2667 | 3.384  | 1.4    | 0.0498 | 1.8177 |
| 4/15/2019 3:11 | 2.2    | 4.9583 | 3.2768 | 1.8333 | 3.3758 | 1.4    | 0.0453 | 1.8086 |
| 4/15/2019 3:12 | 2.1    | 4.7917 | 3.3225 | 1.9667 | 3.3801 | 1.4    | 0.0479 | 1.8269 |
| 4/15/2019 3:13 | 2.1083 | 5.0667 | 3.5765 | 1.75   | 3.3659 | 1.4    | 0.0538 | 1.8075 |
| 4/15/2019 3:14 | 2.2    | 5.225  | 3.3648 | 1.8833 | 3.3661 | 1.3167 | 0.0405 | 1.8018 |
| 4/15/2019 3:15 | 2.1909 | 4.6    | 3.122  | 2.0833 | 3.3524 | 1.3    | 0.0532 | 1.7927 |
| 4/15/2019 3:16 | 2.2083 | 5.0083 | 3.5772 | 1.9333 | 3.3608 | 1.3    | 0.0488 | 1.8053 |
| 4/15/2019 3:17 | 2.2167 | 5.2583 | 3.6588 | 2.0167 | 3.3554 | 1.3    | 0.0419 | 1.7875 |
| 4/15/2019 3:18 | 2.2417 | 4.6667 | 3.462  | 1.8167 | 3.3513 | 1.3    | 0.0524 | 1.785  |
| 4/15/2019 3:19 | 2.275  | 4.2417 | 3.4455 | 1.85   | 3.3475 | 1.3    | 0.0356 | 1.7776 |
| 4/15/2019 3:20 | 2.3    | 4.7167 | 3.8098 | 1.6    | 3.3435 | 1.2667 | 0.0477 | 1.7637 |
| 4/15/2019 3:21 | 2.4083 | 4.6917 | 3.7735 | 2.1833 | 3.3318 | 1.2364 | 0.0448 | 1.7468 |
| 4/15/2019 3:22 | 2.4917 | 4.2333 | 3.8842 | 1.5333 | 3.3348 | 1.2    | 0.0358 | 1.7649 |
| 4/15/2019 3:23 | 2.4917 | 4.25   | 3.5347 | 1.95   | 3.3117 | 1.3    | 0.0524 | 1.7979 |
| 4/15/2019 3:24 | 2.5    | 5.2167 | 3.7497 | 2.5    | 3.313  | 1.3    | 0.0434 | 1.7858 |
| 4/15/2019 3:25 | 2.575  | 5.2333 | 3.6315 | 2.3333 | 3.313  | 1.3    | 0.0443 | 1.7646 |
| 4/15/2019 3:26 | 2.7    | 5.0167 | 3.8388 | 1.8667 | 3.3156 | 1.3    | 0.048  | 1.7995 |
| 4/15/2019 3:27 | 2.8    | 5.2417 | 3.9835 | 1.9167 | 3.2964 | 1.3    | 0.0326 | 1.8106 |
| 4/15/2019 3:28 | 2.8    | 5.5667 | 3.8425 | 2.25   | 3.2956 | 1.3    | 0.0517 | 1.795  |
| 4/15/2019 3:29 | 2.825  | 5.7583 | 4.0367 | 2.1    | 3.2959 | 1.3    | 0.04   | 1.7948 |
| 4/15/2019 3:30 | 3.0167 | 5.675  | 4.3647 | 2.6    | 3.2693 | 1.29   | 0.046  | 1.7625 |
| 4/15/2019 3:31 | 3.1667 | 6.0833 | 4.3595 | 2.5833 | 3.256  | 1.2    | 0.0466 | 1.7634 |
| 4/15/2019 3:32 | 3.1083 | 5.4583 | 3.7782 | 2.2167 | 3.2589 | 1.2    | 0.037  | 1.8083 |
| 4/15/2019 3:33 | 3      | 5.8    | 3.876  | 2.6833 | 3.2417 | 1.2    | 0.0479 | 1.8135 |
| 4/15/2019 3:34 | 2.9167 | 4.9583 | 3.5005 | 2.3333 | 3.2263 | 1.2    | 0.0432 | 1.8228 |
| 4/15/2019 3:35 | 2.8667 | 4.95   | 3.6627 | 2.1333 | 3.2498 | 1.2    | 0.0431 | 1.8158 |
| 4/15/2019 3:36 | 2.75   | 4.575  | 3.9282 | 2.2167 | 3.243  | 1.2    | 0.0502 | 1.8186 |
| 4/15/2019 3:37 | 2.725  | 5.025  | 4.196  | 2.2167 | 3.2331 | 1.2    | 0.035  | 1.808  |
| 4/15/2019 3:38 | 2.7    | 5.7583 | 4.1483 | 2.3667 | 3.217  | 1.2    | 0.0548 | 1.7806 |
| 4/15/2019 3:39 | 2.6833 | 5.7583 | 3.6397 | 2.8333 | 3.1981 | 1.2    | 0.041  | 1.8124 |
| 4/15/2019 3:40 | 2.6667 | 5.1583 | 3.9007 | 2.5167 | 3.1964 | 1.1818 | 0.0511 | 1.8178 |
| 4/15/2019 3:41 | 2.7    | 4.6583 | 3.7795 | 2.0333 | 3.2141 | 1.1917 | 0.0502 | 1.8015 |
| 4/15/2019 3:42 | 2.6833 | 4.5    | 3.6655 | 1.7    | 3.2056 | 1.1    | 0.0396 | 1.7895 |
| 4/15/2019 3:43 | 2.55   | 5.425  | 3.6515 | 2.4333 | 3.1938 | 1.1833 | 0.0537 | 1.7975 |
| 4/15/2019 3:44 | 2.5    | 4.475  | 3.8642 | 2.5    | 3.1745 | 1.2    | 0.0402 | 1.805  |
| 4/15/2019 3:45 | 2.4909 | 4.6167 | 3.695  | 1.4167 | 3.1887 | 1.2    | 0.0479 | 1.7917 |
| 4/15/2019 3:46 | 2.425  | 4.8667 | 4.0012 | 2.15   | 3.1635 | 1.2    | 0.0504 | 1.7833 |
| 4/15/2019 3:47 | 2.5    | 4.9833 | 3.9355 | 2.6833 | 3.1363 | 1.2    | 0.0367 | 1.7944 |
| 4/15/2019 3:48 | 2.5    | 5.125  | 4.248  | 2.1667 | 3.1391 | 1.2    | 0.0505 | 1.7902 |
| 4/15/2019 3:49 | 2.5833 | 5.6667 | 4.0582 | 2.1    | 3.1299 | 1.2    | 0.0423 | 1.8088 |
| 4/15/2019 3:50 | 2.5    | 5.5167 | 3.9643 | 2.15   | 3.1139 | 1.2    | 0.0467 | 1.807  |
| 4/15/2019 3:51 | 2.5917 | 5.3333 | 4.1305 | 2.85   | 3.1006 | 1.1727 | 0.0543 | 1.8045 |
| 4/15/2019 3:52 | 2.7    | 4.9333 | 4.0005 | 2.55   | 3.0978 | 1.2    | 0.0416 | 1.7933 |

|                |        |        |        |        |        |        |        |        |
|----------------|--------|--------|--------|--------|--------|--------|--------|--------|
| 4/15/2019 3:53 | 2.7917 | 5.5583 | 3.7647 | 2.75   | 3.0896 | 1.2    | 0.052  | 1.8164 |
| 4/15/2019 3:54 | 2.8917 | 5.1667 | 4.3065 | 2.9    | 3.0973 | 1.2    | 0.0441 | 1.8219 |
| 4/15/2019 3:55 | 2.8583 | 5.0167 | 4.3217 | 2.75   | 3.0761 | 1.2    | 0.0515 | 1.8053 |
| 4/15/2019 3:56 | 2.9167 | 5.5083 | 4.5115 | 2.7667 | 3.0522 | 1.1    | 0.0529 | 1.7699 |
| 4/15/2019 3:57 | 3.0167 | 6.05   | 4.4766 | 3.1167 | 3.0633 | 1.1    | 0.0401 | 1.7701 |
| 4/15/2019 3:58 | 3.1667 | 4.7417 | 4.4489 | 2.9333 | 3.0518 | 1.1    | 0.0539 | 1.7789 |
| 4/15/2019 3:59 | 3.25   | 6.0833 | 4.2643 | 3.4667 | 3.0259 | 1.1    | 0.0501 | 1.7836 |
| 4/15/2019 4:00 | 3.275  | 5.45   | 4.279  | 3.3    | 3.0283 | 1.1    | 0.0516 | 1.7705 |
| 4/15/2019 4:01 | 3.2    | 5.575  | 4.1099 | 2.5    | 3.0307 | 1.1    | 0.0531 | 1.7849 |
| 4/15/2019 4:02 | 3.1    | 5.45   | 4.2888 | 3.1667 | 3.0287 | 1.1    | 0.0396 | 1.7985 |
| 4/15/2019 4:03 | 3.1    | 5.5667 | 4.1718 | 3.3    | 3.0199 | 1.1    | 0.0555 | 1.7965 |
| 4/15/2019 4:04 | 3.1417 | 5.8833 | 4.3283 | 3.3833 | 3.017  | 1.1    | 0.0421 | 1.7866 |
| 4/15/2019 4:05 | 3.2    | 5.3667 | 3.9555 | 2.45   | 3.0173 | 1.0917 | 0.0546 | 1.8069 |
| 4/15/2019 4:06 | 3.3417 | 6.1167 | 4.4663 | 2.5833 | 3.0057 | 1      | 0.0507 | 1.7963 |
| 4/15/2019 4:07 | 3.3417 | 5.325  | 4.1207 | 2.3667 | 2.986  | 1.04   | 0.045  | 1.7886 |
| 4/15/2019 4:08 | 3.2417 | 5.4833 | 4.1258 | 2.2167 | 3.0183 | 1.1    | 0.0551 | 1.8159 |
| 4/15/2019 4:09 | 3.15   | 5.1583 | 3.9603 | 2.1833 | 3.008  | 1.1    | 0.0428 | 1.8375 |
| 4/15/2019 4:10 | 3.0167 | 4.9167 | 4.1443 | 2.5667 | 2.9912 | 1.1    | 0.053  | 1.8267 |
| 4/15/2019 4:11 | 3.1    | 4.9333 | 4.3751 | 2.1167 | 2.9972 | 1.1    | 0.057  | 1.8321 |
| 4/15/2019 4:12 | 3.0583 | 5.0917 | 4.2775 | 2.5    | 2.9898 | 1.1    | 0.041  | 1.8245 |
| 4/15/2019 4:13 | 2.9833 | 4.6833 | 3.8012 | 2.2333 | 2.9799 | 1.1364 | 0.0585 | 1.8131 |
| 4/15/2019 4:14 | 2.9    | 5.225  | 4.0893 | 2.4333 | 2.9823 | 1.2    | 0.0459 | 1.8279 |
| 4/15/2019 4:15 | 2.925  | 5      | 4.0371 | 2.35   | 2.9657 | 1.1909 | 0.0473 | 1.8244 |
| 4/15/2019 4:16 | 3      | 5.3167 | 4.058  | 2.7167 | 2.9635 | 1.1    | 0.0549 | 1.8356 |
| 4/15/2019 4:17 | 3.0083 | 4.725  | 4.1267 | 2.4667 | 2.9397 | 1.1    | 0.0428 | 1.8579 |
| 4/15/2019 4:18 | 3      | 5.5833 | 4.2586 | 2.6167 | 2.9361 | 1.15   | 0.053  | 1.8225 |
| 4/15/2019 4:19 | 3      | 5.1583 | 4.312  | 2.2833 | 2.9289 | 1.2    | 0.0477 | 1.7893 |
| 4/15/2019 4:20 | 3      | 5.6417 | 4.5736 | 2.2333 | 2.9207 | 1.2    | 0.0498 | 1.8124 |
| 4/15/2019 4:21 | 3      | 5.575  | 4.3293 | 2.8667 | 2.9225 | 1.2    | 0.0538 | 1.8388 |
| 4/15/2019 4:22 | 3      | 5.7583 | 4.3103 | 2.5667 | 2.8948 | 1.2    | 0.0415 | 1.8042 |
| 4/15/2019 4:23 | 3.0167 | 5.3167 | 4.357  | 3.0167 | 2.8952 | 1.2    | 0.0557 | 1.7981 |
| 4/15/2019 4:24 | 3.1    | 5.4667 | 4.3154 | 3.0667 | 2.8668 | 1.225  | 0.0471 | 1.809  |
| 4/15/2019 4:25 | 3.0917 | 5.8417 | 4.1351 | 2.6667 | 2.8493 | 1.2    | 0.046  | 1.8036 |
| 4/15/2019 4:26 | 3.075  | 5.1917 | 4.6484 | 3.1    | 2.849  | 1.2    | 0.0528 | 1.8023 |
| 4/15/2019 4:27 | 3.0333 | 5.175  | 4.381  | 2.5167 | 2.8462 | 1.2    | 0.0393 | 1.7935 |
| 4/15/2019 4:28 | 3.075  | 5.5167 | 4.4388 | 2.65   | 2.8513 | 1.2545 | 0.0541 | 1.7895 |
| 4/15/2019 4:29 | 3      | 4.6917 | 4.1788 | 2.3833 | 2.85   | 1.3    | 0.0507 | 1.8085 |
| 4/15/2019 4:30 | 2.95   | 5.675  | 4.1194 | 2.4333 | 2.8737 | 1.3    | 0.0472 | 1.8226 |
| 4/15/2019 4:31 | 2.8333 | 5.925  | 4.0773 | 2.15   | 2.8616 | 1.2727 | 0.0554 | 1.8127 |
| 4/15/2019 4:32 | 2.7667 | 5.7667 | 3.8098 | 2.6    | 2.8809 | 1.275  | 0.0368 | 1.817  |
| 4/15/2019 4:33 | 2.7    | 5.175  | 4.0768 | 2.2333 | 2.8696 | 1.2455 | 0.0538 | 1.8369 |
| 4/15/2019 4:34 | 2.7    | 5.4917 | 3.7624 | 2.1333 | 2.8743 | 1.2    | 0.0488 | 1.8115 |
| 4/15/2019 4:35 | 2.6583 | 4.8333 | 3.8058 | 2.4333 | 2.8738 | 1.2    | 0.0394 | 1.8421 |
| 4/15/2019 4:36 | 2.6167 | 4.8917 | 3.507  | 2.35   | 2.8651 | 1.2    | 0.0503 | 1.8533 |
| 4/15/2019 4:37 | 2.525  | 4.8833 | 3.7575 | 2.7167 | 2.8608 | 1.2    | 0.0426 | 1.8187 |
| 4/15/2019 4:38 | 2.5333 | 5.0417 | 3.8291 | 1.4667 | 2.8518 | 1.2583 | 0.0488 | 1.8355 |
| 4/15/2019 4:39 | 2.5    | 5.2    | 3.8741 | 2.3667 | 2.8706 | 1.3    | 0.056  | 1.8561 |



|                |        |        |        |        |        |        |        |        |
|----------------|--------|--------|--------|--------|--------|--------|--------|--------|
| 4/15/2019 4:40 | 2.5667 | 4.525  | 3.8775 | 1.9    | 2.863  | 1.3    | 0.0407 | 1.8309 |
| 4/15/2019 4:41 | 2.5833 | 4.9417 | 3.8048 | 2.3167 | 2.8558 | 1.3    | 0.0542 | 1.844  |
| 4/15/2019 4:42 | 2.6    | 5.5083 | 3.7041 | 2.55   | 2.8541 | 1.3    | 0.0409 | 1.8316 |
| 4/15/2019 4:43 | 2.6    | 4.925  | 3.7919 | 1.4167 | 2.8516 | 1.3    | 0.0535 | 1.8165 |
| 4/15/2019 4:44 | 2.6    | 4.7083 | 3.9998 | 1.85   | 2.8404 | 1.3    | 0.0512 | 1.8176 |
| 4/15/2019 4:45 | 2.6    | 5.2333 | 3.7462 | 2.0667 | 2.8425 | 1.3    | 0.038  | 1.8252 |
| 4/15/2019 4:46 | 2.6    | 5.15   | 3.8569 | 2.3667 | 2.839  | 1.3    | 0.0564 | 1.8114 |
| 4/15/2019 4:47 | 2.6667 | 5.5833 | 3.9473 | 2.05   | 2.832  | 1.3    | 0.0357 | 1.8302 |
| 4/15/2019 4:48 | 2.7    | 4.9583 | 3.6899 | 2.0667 | 2.8268 | 1.325  | 0.0414 | 1.8281 |
| 4/15/2019 4:49 | 2.7    | 4.85   | 3.9077 | 2.35   | 2.8197 | 1.39   | 0.0496 | 1.8362 |
| 4/15/2019 4:50 | 2.8    | 4.9583 | 4.2199 | 2.6667 | 2.8094 | 1.3083 | 0.0424 | 1.8251 |
| 4/15/2019 4:51 | 2.875  | 5.5833 | 3.9894 | 2.2333 | 2.7984 | 1.3    | 0.0538 | 1.8173 |
| 4/15/2019 4:52 | 2.9    | 5.725  | 3.9652 | 2.8    | 2.7999 | 1.2636 | 0.0413 | 1.8284 |
| 4/15/2019 4:53 | 2.925  | 5.5667 | 4.4472 | 2.2833 | 2.7853 | 1.2    | 0.0425 | 1.8011 |
| 4/15/2019 4:54 | 3.05   | 5.4917 | 4.4249 | 2.2833 | 2.7806 | 1.2    | 0.0454 | 1.8144 |
| 4/15/2019 4:55 | 3.1091 | 6.3    | 4.3455 | 2.5833 | 2.7787 | 1.2    | 0.0416 | 1.7884 |
| 4/15/2019 4:56 | 3.1417 | 5.1917 | 4.4826 | 2.6    | 2.7527 | 1.2364 | 0.054  | 1.7847 |
| 4/15/2019 4:57 | 3.2    | 5.5833 | 4.4398 | 2.4    | 2.7584 | 1.2636 | 0.0369 | 1.7808 |
| 4/15/2019 4:58 | 3.2167 | 5.2917 | 4.4801 | 2.8    | 2.7568 | 1.2    | 0.0455 | 1.7923 |
| 4/15/2019 4:59 | 3.2667 | 5.7167 | 4.3022 | 2.75   | 2.7724 | 1.2    | 0.0448 | 1.797  |
| 4/15/2019 5:00 | 3.2    | 5.5    | 4.438  | 2.9    | 2.7654 | 1.2    | 0.0387 | 1.813  |
| 4/15/2019 5:01 | 3.2    | 5.7417 | 4.4566 | 3.05   | 2.7762 | 1.2    | 0.0477 | 1.7941 |
| 4/15/2019 5:02 | 3.2    | 5.525  | 4.5427 | 2.7    | 2.7919 | 1.2    | 0.0375 | 1.7746 |
| 4/15/2019 5:03 | 3.2    | 5.0417 | 4.3678 | 2.9333 | 2.7778 | 1.2    | 0.0457 | 1.7898 |
| 4/15/2019 5:04 | 3.1583 | 5.725  | 4.2146 | 2.3167 | 2.7819 | 1.2    | 0.0493 | 1.8427 |
| 4/15/2019 5:05 | 2.9333 | 5.275  | 3.9679 | 2.2667 | 2.7841 | 1.2    | 0.0355 | 1.8125 |
| 4/15/2019 5:06 | 2.8167 | 4.775  | 4.0047 | 2.4667 | 2.7918 | 1.2    | 0.0441 | 1.7895 |
| 4/15/2019 5:07 | 2.7    | 5.15   | 3.7632 | 2      | 2.7802 | 1.2    | 0.0428 | 1.7913 |
| 4/15/2019 5:08 | 2.7    | 5.35   | 4.1959 | 1.8833 | 2.7836 | 1.2    | 0.0481 | 1.8137 |
| 4/15/2019 5:09 | 2.6417 | 5.2    | 3.981  | 1.6667 | 2.7946 | 1.2    | 0.0475 | 1.8055 |
| 4/15/2019 5:10 | 2.6    | 4.9083 | 3.9147 | 2.3    | 2.8147 | 1.2    | 0.032  | 1.8033 |
| 4/15/2019 5:11 | 2.6333 | 4.7    | 3.8706 | 2.5167 | 2.8281 | 1.2    | 0.0509 | 1.8149 |
| 4/15/2019 5:12 | 2.6417 | 5.275  | 4.0674 | 2.65   | 2.8097 | 1.2    | 0.0411 | 1.7923 |
| 4/15/2019 5:13 | 2.65   | 5.8417 | 3.9207 | 2      | 2.8245 | 1.2    | 0.0409 | 1.7907 |
| 4/15/2019 5:14 | 2.6    | 5.25   | 3.71   | 1.8333 | 2.8107 | 1.2    | 0.0484 | 1.8087 |
| 4/15/2019 5:15 | 2.55   | 4.6833 | 3.55   | 1.9667 | 2.8119 | 1.2    | 0.036  | 1.8136 |
| 4/15/2019 5:16 | 2.5    | 4.6333 | 3.5461 | 1.95   | 2.8146 | 1.2    | 0.0511 | 1.7921 |
| 4/15/2019 5:17 | 2.5    | 5.1667 | 3.8873 | 1.8667 | 2.8289 | 1.2    | 0.0447 | 1.8035 |
| 4/15/2019 5:18 | 2.5667 | 5.2417 | 3.9762 | 2.2    | 2.8801 | 1.2    | 0.0333 | 1.7973 |
| 4/15/2019 5:19 | 2.6    | 4.7833 | 3.7828 | 2.3    | 2.8641 | 1.2    | 0.0499 | 1.8075 |
| 4/15/2019 5:20 | 2.6    | 5.35   | 3.8508 | 2.2833 | 2.921  | 1.2    | 0.0399 | 1.803  |
| 4/15/2019 5:21 | 2.6    | 5.1917 | 3.7433 | 2.2833 | 2.9489 | 1.2    | 0.0477 | 1.7948 |
| 4/15/2019 5:22 | 2.6833 | 4.725  | 4.0263 | 1.9333 | 3.0344 | 1.2    | 0.0468 | 1.7868 |
| 4/15/2019 5:23 | 2.7    | 5.0417 | 3.682  | 2.3    | 2.9642 | 1.2    | 0.0344 | 1.791  |
| 4/15/2019 5:24 | 2.6917 | 5.475  | 3.7372 | 2.3167 | 2.9864 | 1.2    | 0.0507 | 1.8043 |
| 4/15/2019 5:25 | 2.6    | 5.3167 | 3.6848 | 2.35   | 3.0191 | 1.2    | 0.0393 | 1.8332 |
| 4/15/2019 5:26 | 2.6    | 5.2833 | 3.963  | 2.1667 | 3.0456 | 1.2    | 0.0494 | 1.8198 |

|                |        |        |        |        |        |        |        |        |
|----------------|--------|--------|--------|--------|--------|--------|--------|--------|
| 4/15/2019 5:27 | 2.625  | 5.5417 | 4.113  | 2.2167 | 3.047  | 1.125  | 0.0434 | 1.8038 |
| 4/15/2019 5:28 | 2.7    | 4.875  | 4.1805 | 2.1833 | 3.0832 | 1.2    | 0.0382 | 1.7977 |
| 4/15/2019 5:29 | 2.7083 | 4.9917 | 4.3093 | 2.55   | 3.3318 | 1.2    | 0.0512 | 1.7894 |
| 4/15/2019 5:30 | 2.7083 | 4.5    | 3.9708 | 2.2667 | 3.2487 | 1.2    | 0.0407 | 1.7893 |
| 4/15/2019 5:31 | 2.7    | 5.4333 | 4.0665 | 2.5167 | 3.2993 | 1.2    | 0.0464 | 1.7998 |
| 4/15/2019 5:32 | 2.7    | 5.575  | 3.8753 | 2.0667 | 3.4026 | 1.2    | 0.0528 | 1.7924 |
| 4/15/2019 5:33 | 2.65   | 5.2417 | 4.0787 | 2.5833 | 3.4282 | 1.2    | 0.0467 | 1.818  |
| 4/15/2019 5:34 | 2.6    | 4.5417 | 3.7775 | 2.8167 | 3.396  | 1.1167 | 0.0536 | 1.8385 |
| 4/15/2019 5:35 | 2.4833 | 4.9    | 3.8155 | 1.8833 | 3.4021 | 1.2    | 0.0417 | 1.8267 |
| 4/15/2019 5:36 | 2.4    | 4.9167 | 3.7953 | 1.85   | 3.4241 | 1.2    | 0.0493 | 1.8364 |
| 4/15/2019 5:37 | 2.325  | 4.0833 | 3.6587 | 2.6333 | 3.4877 | 1.2    | 0.0495 | 1.8233 |
| 4/15/2019 5:38 | 2.2583 | 4.2333 | 3.6328 | 2.2833 | 3.4102 | 1.2    | 0.0418 | 1.8081 |
| 4/15/2019 5:39 | 2.1833 | 5.075  | 3.7178 | 2.15   | 3.3277 | 1.2    | 0.0564 | 1.8363 |
| 4/15/2019 5:40 | 2.1167 | 4.65   | 3.4972 | 1.9333 | 3.4653 | 1.2    | 0.0381 | 1.8223 |
| 4/15/2019 5:41 | 2.1    | 4.3583 | 3.3018 | 2.2167 | 3.5138 | 1.2    | 0.0488 | 1.8248 |
| 4/15/2019 5:42 | 2.1583 | 4.6583 | 3.2957 | 1.0833 | 3.3967 | 1.2    | 0.049  | 1.8277 |
| 4/15/2019 5:43 | 2.1083 | 4.625  | 3.2775 | 1.3833 | 3.4088 | 1.2    | 0.0371 | 1.8242 |
| 4/15/2019 5:44 | 2.1    | 4.7333 | 3.4532 | 1.6333 | 3.4651 | 1.2    | 0.0548 | 1.8293 |
| 4/15/2019 5:45 | 2.1    | 3.7083 | 3.0148 | 2.05   | 3.5727 | 1.2    | 0.0397 | 1.8029 |
| 4/15/2019 5:46 | 2.0333 | 4.525  | 3.3408 | 1.8833 | 3.6036 | 1.2    | 0.0434 | 1.8392 |
| 4/15/2019 5:47 | 2.075  | 4.1583 | 3.3452 | 1.55   | 3.6844 | 1.2    | 0.0566 | 1.8407 |
| 4/15/2019 5:48 | 2      | 4.575  | 3.0343 | 1.2333 | 3.7006 | 1.2    | 0.039  | 1.8451 |
| 4/15/2019 5:49 | 2.1    | 4.5333 | 3.1605 | 1.8167 | 3.8567 | 1.2    | 0.0556 | 1.845  |
| 4/15/2019 5:50 | 2.075  | 5.2333 | 3.2995 | 1.3667 | 3.9121 | 1.2    | 0.0415 | 1.8203 |
| 4/15/2019 5:51 | 2.0167 | 4.1333 | 3.25   | 1.3167 | 3.8889 | 1.2    | 0.0511 | 1.8198 |
| 4/15/2019 5:52 | 2      | 4.1333 | 3.2288 | 1.8833 | 3.9638 | 1.2    | 0.0455 | 1.8258 |
| 4/15/2019 5:53 | 2      | 3.825  | 3.177  | 1.2    | 4.1028 | 1.2    | 0.0383 | 1.8024 |
| 4/15/2019 5:54 | 2      | 4.2083 | 3.2687 | 1.3833 | 4.1831 | 1.2    | 0.0524 | 1.7894 |
| 4/15/2019 5:55 | 1.9818 | 4.075  | 3.3028 | 1.9167 | 4.4105 | 1.2    | 0.0516 | 1.772  |
| 4/15/2019 5:56 | 1.9333 | 4.3333 | 3.25   | 1.1667 | 4.3485 | 1.2    | 0.0449 | 1.7906 |
| 4/15/2019 5:57 | 1.9083 | 4.45   | 3.3663 | 1.45   | 4.4726 | 1.2    | 0.058  | 1.788  |
| 4/15/2019 5:58 | 1.9    | 3.675  | 3.226  | 1.4333 | 4.4813 | 1.2    | 0.0461 | 1.807  |
| 4/15/2019 5:59 | 1.8583 | 4.825  | 3.1065 | 1.4167 | 4.7998 | 1.2    | 0.0502 | 1.7968 |
| 4/15/2019 6:00 | 1.8    | 4.175  | 3.1622 | 1.5833 | 4.5798 | 1.2    | 0.0509 | 1.8023 |
| 4/15/2019 6:01 | 1.8333 | 4.1917 | 3.1673 | 1.4333 | 4.782  | 1.2    | 0.0414 | 1.7952 |
| 4/15/2019 6:02 | 1.8    | 4.1333 | 3.472  | 1.5167 | 4.9929 | 1.2182 | 0.0622 | 1.798  |
| 4/15/2019 6:03 | 1.8    | 3.9    | 3.2605 | 0.9    | 4.9978 | 1.3    | 0.0455 | 1.82   |
| 4/15/2019 6:04 | 1.75   | 3.8583 | 3.1618 | 1.35   | 5.0568 | 1.3    | 0.0602 | 1.8094 |
| 4/15/2019 6:05 | 1.7    | 4.5583 | 3.1413 | 1.65   | 5.1228 | 1.3    | 0.0516 | 1.8107 |
| 4/15/2019 6:06 | 1.7417 | 4.35   | 3.266  | 1.15   | 5.1131 | 1.3    | 0.0483 | 1.8127 |
| 4/15/2019 6:07 | 1.7083 | 4.175  | 3.2398 | 1.0167 | 5.1318 | 1.3    | 0.0581 | 1.8028 |
| 4/15/2019 6:08 | 1.6667 | 4.3417 | 3.0765 | 1.4167 | 4.9407 | 1.3    | 0.0451 | 1.7898 |
| 4/15/2019 6:09 | 1.6    | 4.125  | 3.0162 | 1.4833 | 5.1324 | 1.3    | 0.0562 | 1.813  |
| 4/15/2019 6:10 | 1.5917 | 3.8917 | 3.002  | 1.2833 | 5.0162 | 1.3727 | 0.0535 | 1.8367 |
| 4/15/2019 6:11 | 1.5583 | 4.175  | 2.9743 | 1.1167 | 5.1678 | 1.4    | 0.0436 | 1.8445 |
| 4/15/2019 6:12 | 1.5    | 3.875  | 1.7709 | 0.7833 | 5.0505 | 1.4    | 0.0575 | 1.8566 |
| 4/15/2019 6:13 | 1.5167 | 4.675  | 2.7255 | 1.0833 | 5.1826 | 1.4    | 0.0531 | 1.8287 |

|                |        |        |        |        |        |        |         |        |
|----------------|--------|--------|--------|--------|--------|--------|---------|--------|
| 4/15/2019 6:14 | 1.5333 | 3.85   | 2.9858 | 1.1167 | 4.9373 | 1.5    | 0.0554  | 1.8193 |
| 4/15/2019 6:15 | 1.5    | 4.4083 | 3.1898 | 1      | 5.0834 | 1.5    | 0.0643  | 1.8175 |
| 4/15/2019 6:16 | 1.5    | 3.6583 | 2.7603 | 0.7    | 5.2048 | 1.5    | 0.0465  | 1.8103 |
| 4/15/2019 6:17 | 1.5    | 4.025  | 2.8048 | 0.7    | 5.1449 | 1.5    | 0.0639  | 1.826  |
| 4/15/2019 6:18 | 1.5083 | 3.8667 | 2.8587 | 1.2333 | 5.3063 | 1.5    | 0.059   | 1.815  |
| 4/15/2019 6:19 | 1.475  | 4.275  | 2.571  | 1.0833 | 5.3126 | 1.5    | 0.0524  | 1.8153 |
| 4/15/2019 6:20 | 1.4    | 3.4417 | 2.8903 | 1.0167 | 5.3331 | 1.5    | 0.0636  | 1.8005 |
| 4/15/2019 6:21 | 1.3667 | 3.5    | 2.8622 | 0.8167 | 5.3426 | 1.6    | 0.0511  | 1.82   |
| 4/15/2019 6:22 | 1.3833 | 3.9333 | 2.94   | 1.3167 | 5.5795 | 1.6    | 0.0602  | 1.8306 |
| 4/15/2019 6:23 | 1.4    | 3.8167 | 2.5638 | 1.15   | 5.5188 | 1.6    | 0.0585  | 1.8335 |
| 4/15/2019 6:24 | 1.4583 | 3.75   | 2.6283 | 0.8167 | 5.5831 | 1.6    | 0.0568  | 1.8333 |
| 4/15/2019 6:25 | 1.5    | 4.0583 | 2.7443 | 1.0833 | 5.8826 | 1.6    | 0.0727  | 1.813  |
| 4/15/2019 6:26 | 1.5    | 4.2583 | 2.9233 | 0.9167 | 5.7904 | 1.6    | 0.0535  | 1.8254 |
| 4/15/2019 6:27 | 1.5    | 4.225  | 2.6597 | 1.0833 | 5.6236 | 1.6    | 0.0661  | 1.845  |
| 4/15/2019 6:28 | 1.5    | 4.1    | 2.6732 | 1.45   | 5.626  | 1.6    | 0.0642  | 1.8317 |
| 4/15/2019 6:29 | 1.5    | 3.9833 | 2.6295 | 1.5667 | 5.6702 | 1.6    | 0.0565  | 1.8193 |
| 4/15/2019 6:30 | 1.6    | 4.125  | 2.9307 | 1.7833 | 5.8963 | 1.6    | 0.0696  | 1.8271 |
| 4/15/2019 6:31 | 1.6    | 3.5833 | 2.8487 | 1.8167 | 6.0113 | 1.6    | 0.0601  | 1.8232 |
| 4/15/2019 6:32 | 1.6    | 4.3    | 2.3263 | 1.55   | 6.0428 | 1.6    | 0.0631  | 1.8213 |
| 4/15/2019 6:33 | 1.6583 | 3.7667 | 2.6297 | 0.85   | 6.1526 | 1.6    | 0.0712  | 1.8455 |
| 4/15/2019 6:34 | 1.7    | 3.8833 | 2.9218 | 1.6    | 6.395  | 1.6    | 0.066   | 1.8095 |
| 4/15/2019 6:35 | 1.7417 | 3.6417 | 3.0255 | 1.15   | 6.5003 | 1.5455 | 0.0789  | 1.7924 |
| 4/15/2019 6:36 | 1.8    | 3.3    | 2.7265 | 1.4333 | 6.3303 | 1.6    | 0.0737  | 1.8172 |
| 4/15/2019 6:37 | 1.7333 | 4.2083 | 2.7907 | 0.4667 | 5.9503 | 1.6    | 0.0574  | 1.8617 |
| 4/15/2019 6:38 | 1.6583 | 3.9583 | 2.5563 | 0.7333 | 6.0488 | 1.56   | 0.0732  | 1.8557 |
| 4/15/2019 6:39 | 1.55   | 3.75   | 2.569  | 0.7333 | 5.9483 | 1.5    | 0.0571  | 1.8478 |
| 4/15/2019 6:40 | 1.5917 | 4.0833 | 2.6987 | 1.3    | 5.9462 | 1.5    | 0.0694  | 1.8776 |
| 4/15/2019 6:41 | 1.525  | 3.4917 | 2.7373 | 0.9    | 5.9566 | 1.54   | 0.0656  | 1.8709 |
| 4/15/2019 6:42 | 1.4917 | 3.725  | 2.4912 | 0.3167 | 5.8381 | 1.5    | 0.0587  | 1.8429 |
| 4/15/2019 6:43 | 1.5    | 3.7833 | 2.7568 | 1.1333 | 5.8498 | 1.5    | 0.0745  | 1.8404 |
| 4/15/2019 6:44 | 1.4583 | 4.4583 | 2.5538 | 1.25   | 5.9174 | 1.5364 | 0.0629  | 1.841  |
| 4/15/2019 6:45 | 1.5    | 4.0833 | 2.538  | 0.7333 | 5.9862 | 1.56   | 0.0711  | 1.8305 |
| 4/15/2019 6:46 | 1.5    | 3.0167 | 2.5875 | 1      | 5.9544 | 1.59   | -0.0046 | 1.8674 |
| 4/15/2019 6:47 | 1.5    | 4.2667 | 1.7172 | 1.1667 | 5.9223 | 1.6    | -0.1031 | 1.8626 |
| 4/15/2019 6:48 | 1.5    | 3.4    | 2.1728 | 1.3167 | 6.0166 | 1.5778 | -0.09   | 1.8448 |
| 4/15/2019 6:49 | 1.5    | 3.55   | 1.7414 | 0.5333 | 6.0197 | 1.5    | -0.1022 | 1.8463 |
| 4/15/2019 6:50 | 1.5    | 3.0917 | 1.5898 | 0.5167 | 6.0108 | 1.5    | -0.1053 | 1.8431 |
| 4/15/2019 6:51 | 1.525  | 3.675  | 2.422  | 1.3    | 5.9949 | 1.5    | -0.0992 | 1.8473 |
| 4/15/2019 6:52 | 1.5417 | 2.7917 | 1.8028 | 1      | 6.0237 | 1.5    | -0.1195 | 1.8399 |
| 4/15/2019 6:53 | 1.6    | 3.725  | 2.4492 | 1.5333 | 6.0718 | 1.5    | -0.1012 | 1.8253 |
| 4/15/2019 6:54 | 1.6417 | 3.825  | 2.6477 | 1.0667 | 6.0522 | 1.5    | -0.1045 | 1.8373 |
| 4/15/2019 6:55 | 1.7417 | 4.3333 | 2.6789 | 1.1167 | 6.1331 | 1.5    | -0.1048 | 1.8335 |
| 4/15/2019 6:56 | 1.8    | 4.475  | 2.7705 | 1.3167 | 6.0983 | 1.4455 | -0.0984 | 1.8215 |
| 4/15/2019 6:57 | 1.8333 | 3.3333 | 2.3223 | 0.8667 | 6.014  | 1.4    | -0.1116 | 1.8333 |
| 4/15/2019 6:58 | 1.8167 | 3.9417 | 2.5293 | 0.9333 | 6.0001 | 1.4    | -0.1004 | 1.8403 |
| 4/15/2019 6:59 | 1.7667 | 4.2583 | 2.8094 | 1.2    | 5.9914 | 1.3583 | -0.1069 | 1.8483 |
| 4/15/2019 7:00 | 1.8833 | 4.3667 | 2.9107 | 1.8667 | 6.0236 | 1.3    | -0.1101 | 1.8241 |

|                |        |        |        |        |        |        |         |        |
|----------------|--------|--------|--------|--------|--------|--------|---------|--------|
| 4/15/2019 7:01 | 2.025  | 4.0083 | 2.7663 | 1.0333 | 5.9634 | 1.3    | -0.0993 | 1.8209 |
| 4/15/2019 7:02 | 2.1    | 3.55   | 3.1042 | 1      | 5.9322 | 1.3    | -0.1129 | 1.8365 |
| 4/15/2019 7:03 | 2.1    | 4.0417 | 3.2452 | 1.3833 | 5.9349 | 1.3    | -0.1153 | 1.8063 |
| 4/15/2019 7:04 | 2.1417 | 4.0167 | 3.3248 | 1.6167 | 5.8998 | 1.3    | -0.1058 | 1.8292 |
| 4/15/2019 7:05 | 2.2917 | 4.1667 | 2.6173 | 1.5    | 5.8753 | 1.3    | -0.1179 | 1.8153 |
| 4/15/2019 7:06 | 2.2636 | 4.725  | 2.5819 | 1.4667 | 5.8491 | 1.3    | -0.1033 | 1.818  |
| 4/15/2019 7:07 | 2.2    | 4.675  | 2.1462 | 1.2333 | 5.8228 | 1.3    | -0.1088 | 1.8101 |
| 4/15/2019 7:08 | 2.2    | 5.2833 | 2.9761 | 1.4833 | 5.8003 | 1.3    | -0.1059 | 1.7688 |
| 4/15/2019 7:09 | 2.2    | 4.7917 | 2.84   | 1.4833 | 5.7693 | 1.3    | -0.1087 | 1.782  |
| 4/15/2019 7:10 | 2.2    | 4.375  | 2.4635 | 1.8167 | 5.7278 | 1.3    | -0.1074 | 1.8067 |
| 4/15/2019 7:11 | 2.1083 | 4.9    | 3.0714 | 1.4667 | 5.73   | 1.3    | -0.1143 | 1.8143 |
| 4/15/2019 7:12 | 2.1667 | 4.7417 | 2.2218 | 2.0833 | 5.6909 | 1.3    | -0.1035 | 1.8288 |
| 4/15/2019 7:13 | 2.2583 | 3.8917 | 3.4293 | 1.9833 | 5.6764 | 1.3    | -0.117  | 1.8264 |
| 4/15/2019 7:14 | 2.3833 | 5.2833 | 3.0688 | 1.7667 | 5.6344 | 1.3    | -0.108  | 1.8157 |
| 4/15/2019 7:15 | 2.3917 | 4.75   | 3.1488 | 1.75   | 5.6286 | 1.3    | -0.1034 | 1.8123 |
| 4/15/2019 7:16 | 2.4    | 4.5417 | 3.6218 | 1.9833 | 5.579  | 1.3    | -0.1175 | 1.8352 |
| 4/15/2019 7:17 | 2.3    | 4.6417 | 3.2647 | 0.9333 | 5.5732 | 1.3    | -0.0991 | 1.8402 |
| 4/15/2019 7:18 | 2.2167 | 4.4583 | 2.574  | 1.85   | 5.6238 | 1.3    | -0.1062 | 1.8347 |
| 4/15/2019 7:19 | 2.0167 | 4.5167 | 2.6839 | 1.35   | 5.6268 | 1.3    | -0.1048 | 1.8396 |
| 4/15/2019 7:20 | 1.9333 | 3.5833 | 2.7366 | 1.7333 | 5.5913 | 1.3    | -0.103  | 1.8173 |
| 4/15/2019 7:21 | 1.9083 | 4.025  | 2.9443 | 1.7833 | 5.5689 | 1.3    | -0.1158 | 1.8543 |
| 4/15/2019 7:22 | 2.025  | 4.5167 | 2.8863 | 1.7333 | 5.5342 | 1.3    | -0.0969 | 1.8321 |
| 4/15/2019 7:23 | 2.075  | 4.6583 | 3.1736 | 1.6833 | 5.5124 | 1.3    | -0.111  | 1.8435 |
| 4/15/2019 7:24 | 2      | 4.6167 | 2.7106 | 1.3667 | 5.5227 | 1.3    | -0.1107 | 1.8489 |
| 4/15/2019 7:25 | 1.9333 | 4.2    | 2.9219 | 0.95   | 5.5065 | 1.3636 | -0.1051 | 1.8303 |
| 4/15/2019 7:26 | 1.9    | 4.5333 | 3.2138 | 0.95   | 5.4746 | 1.4    | -0.1106 | 1.8475 |
| 4/15/2019 7:27 | 1.975  | 3.9083 | 2.4229 | 1.4833 | 5.4424 | 1.4    | -0.1013 | 1.8523 |
| 4/15/2019 7:28 | 2.0583 | 4.325  | 3.576  | 0.9    | 5.364  | 1.4    | -0.1114 | 1.8433 |
| 4/15/2019 7:29 | 2.1417 | 4.9083 | 3.3541 | 2.0667 | 5.37   | 1.36   | -0.1059 | 1.8372 |
| 4/15/2019 7:30 | 2.2    | 5.2    | 3.0184 | 1.4833 | 5.3668 | 1.3    | -0.1103 | 1.8419 |
| 4/15/2019 7:31 | 2.2583 | 4.775  | 3.2263 | 1.2333 | 5.2663 | 1.3    | -0.1142 | 1.8391 |
| 4/15/2019 7:32 | 2.2667 | 4.3083 | 3.9337 | 1.9167 | 5.1788 | 1.3    | -0.1006 | 1.798  |
| 4/15/2019 7:33 | 2.2917 | 3.7167 | 3.5524 | 2.1833 | 5.138  | 1.3    | -0.1118 | 1.7838 |
| 4/15/2019 7:34 | 2.425  | 4.675  | 3.4986 | 2.3    | 5.0533 | 1.3    | -0.1043 | 1.789  |
| 4/15/2019 7:35 | 2.4833 | 4.1583 | 3.7618 | 1.7333 | 5.0793 | 1.3    | -0.1047 | 1.8002 |
| 4/15/2019 7:36 | 2.575  | 5.2917 | 3.6771 | 2.1    | 5.0389 | 1.3545 | -0.1125 | 1.8158 |
| 4/15/2019 7:37 | 2.575  | 4.8333 | 2.9337 | 2.2167 | 4.9402 | 1.35   | -0.0991 | 1.8203 |
| 4/15/2019 7:38 | 2.6333 | 5.1667 | 3.7063 | 2.2    | 4.9153 | 1.3    | -0.1166 | 1.8275 |
| 4/15/2019 7:39 | 2.6667 | 4.975  | 3.4578 | 1.8333 | 4.916  | 1.3909 | -0.1091 | 1.8425 |
| 4/15/2019 7:40 | 2.6    | 4.575  | 3.716  | 1.6167 | 4.9559 | 1.4    | -0.1096 | 1.8714 |
| 4/15/2019 7:41 | 2.5083 | 4.6917 | 3.3115 | 1.5333 | 4.8855 | 1.4    | -0.1182 | 1.8795 |
| 4/15/2019 7:42 | 2.5417 | 4.6917 | 3.573  | 2.3833 | 4.8234 | 1.4    | -0.1042 | 1.8743 |
| 4/15/2019 7:43 | 2.6833 | 4.65   | 3.7387 | 2.2167 | 4.771  | 1.4    | -0.1177 | 1.8761 |
| 4/15/2019 7:44 | 2.725  | 5.0167 | 3.5626 | 1.8667 | 4.7816 | 1.47   | -0.1038 | 1.8837 |
| 4/15/2019 7:45 | 2.7333 | 4.5417 | 3.6613 | 1.3167 | 4.8003 | 1.5    | -0.1102 | 1.8913 |
| 4/15/2019 7:46 | 2.6333 | 4.95   | 3.5613 | 1.8667 | 4.7479 | 1.5    | -0.1062 | 1.8796 |
| 4/15/2019 7:47 | 2.7    | 4.9667 | 3.4952 | 2.35   | 4.7231 | 1.5    | -0.103  | 1.8608 |

|                |        |        |          |         |         |         |         |        |
|----------------|--------|--------|----------|---------|---------|---------|---------|--------|
| 4/15/2019 7:48 | 2.7833 | 4.5    | 3.8328   | 2.0333  | 4.688   | 1.5917  | -0.0905 | 1.8809 |
| 4/15/2019 7:49 | 2.7833 | 4.9083 | 3.7922   | 2.0167  | 4.7747  | 1.6     | 0.0284  | 1.9193 |
| 4/15/2019 7:50 | 2.65   | 5.0583 | 3.6981   | 1.5167  | 4.7993  | 1.58    | 0.0528  | 1.9368 |
| 4/15/2019 7:51 | 2.525  | 4.3583 | 3.6255   | 1.85    | 4.7685  | 1.5     | 0.0503  | 1.9438 |
| 4/15/2019 7:52 | 2.525  | 5.325  | 3.5088   | 1.9167  | 4.778   | 1.5     | 0.0734  | 1.9304 |
| 4/15/2019 7:53 | 2.6    | 5.1    | 3.7058   | 1.7667  | 4.6929  | 1.5     | 0.0616  | 1.8985 |
| 4/15/2019 7:54 | 2.6167 | 4.325  | 3.6249   | 2.15    | 4.6739  | 1.5     | 0.0623  | 1.9264 |
| 4/15/2019 7:55 | 2.725  | 5.0583 | 4.0908   | 2.2     | 4.6185  | 1.5     | 0.0691  | 1.8962 |
| 4/15/2019 7:56 | 2.7    | 4.8583 | 4.0284   | 2.5333  | 4.6367  | 1.5     | 0.0538  | 1.913  |
| 4/15/2019 7:57 | 2.7083 | 4.7583 | 3.6937   | 2.3     | 4.6469  | 1.4818  | 0.0623  | 1.9415 |
| 4/15/2019 7:58 | 2.7    | 4.3083 | 3.4672   | 2.2667  | 4.6735  | 1.4     | 0.0655  | 1.9107 |
| 4/15/2019 7:59 | 2.6583 | 4.7083 | 3.5934   | 2.2     | 4.7815  | 1.4     | 0.0601  | 1.9449 |
| 4/15/2019 8:00 | 2.525  | 4.375  | 5.4428   | 1.75    | 11.9458 | 2.81    | 0.177   | 1.9538 |
| 4/15/2019 8:01 | 2.1333 | 3.6333 | 22.6408  | 1.75    | 17.302  | 30.6364 | 0.5995  | 2.0342 |
| 4/15/2019 8:02 | 1.625  | 3.025  | 62.9158  | 1.4833  | 21.6758 | 51.5556 | 1.5095  | 2.1972 |
| 4/15/2019 8:03 | 1.025  | 3.95   | 175.8125 | 4.75    | 27.9135 | 58.2364 | 3.4332  | 2.6018 |
| 4/15/2019 8:04 | 0.6083 | 1.7833 | 229.5917 | 2.8     | 23.5273 | 49.9    | 4.0893  | 2.8461 |
| 4/15/2019 8:05 | 0.4    | 2.0667 | 161.8917 | 1.8167  | 26.8531 | 49.77   | 3.1932  | 2.7573 |
| 4/15/2019 8:06 | 0.3    | 2.5667 | 109.2917 | 1.1833  | 26.7293 | 62.0111 | 2.8257  | 2.61   |
| 4/15/2019 8:07 | 0.3    | 2.375  | 111.3417 | 1.65    | 26.6374 | 54.36   | 3.1281  | 2.6386 |
| 4/15/2019 8:08 | 0.25   | 2.6333 | 95.395   | 1.4167  | 22.9687 | 49.85   | 3.2437  | 2.6183 |
| 4/15/2019 8:09 | 0.275  | 2.025  | 84.0492  | 1.1     | 21.8684 | 46.6364 | 3.0653  | 2.5776 |
| 4/15/2019 8:10 | 0.275  | 2.775  | 80.49    | 0.5     | 21.3714 | 45.22   | 3.1324  | 2.5363 |
| 4/15/2019 8:11 | 0.3    | 2.9    | 78.935   | 0.3833  | 21.0668 | 44.7273 | 3.3584  | 2.525  |
| 4/15/2019 8:12 | 0.3    | 2.225  | 78.8183  | 0.6333  | 21.5919 | 48      | 3.4223  | 2.546  |
| 4/15/2019 8:13 | 0.2833 | 2.6583 | 80.1725  | 1.1     | 22.0416 | 47.3364 | 2.604   | 2.5472 |
| 4/15/2019 8:14 | 0.2    | 2.4167 | 75.3725  | 0.6333  | 21.2585 | 47.22   | 2.7562  | 2.5173 |
| 4/15/2019 8:15 | 0.225  | 2.7083 | 75.1692  | 0.7333  | 21.546  | 47.1909 | 2.6593  | 2.5399 |
| 4/15/2019 8:16 | 0.2333 | 2.5167 | 70.7117  | 0.25    | 20.7152 | 46.93   | 2.6636  | 2.5198 |
| 4/15/2019 8:17 | 0.2    | 2.4417 | 68.8317  | 0.4333  | 20.2013 | 46.6091 | 2.7653  | 2.4776 |
| 4/15/2019 8:18 | 0.1583 | 2.5417 | 62.3758  | 0.8333  | 19.2328 | 46.32   | 3.0227  | 2.47   |
| 4/15/2019 8:19 | 0.1    | 3.275  | 58.6983  | 0.1833  | 18.8048 | 46.0182 | 2.7588  | 2.4525 |
| 4/15/2019 8:20 | 0.1    | 2.8417 | 55.5333  | 0.55    | 18.24   | 45.4111 | 2.6919  | 2.3929 |
| 4/15/2019 8:21 | 0.1    | 2.0917 | 54.4842  | 0.2667  | 17.9673 | 44.9364 | 2.7381  | 2.3862 |
| 4/15/2019 8:22 | 0.1    | 2.25   | 50.7425  | 0.0333  | 17.5437 | 44.5    | 3.1545  | 2.4054 |
| 4/15/2019 8:23 | 0.1    | 2.7333 | 54.2192  | 0.25    | 18.0638 | 44.1091 | 2.9439  | 2.4611 |
| 4/15/2019 8:24 | 0.1    | 2.0417 | 53.8975  | 0.5167  | 17.9331 | 43.64   | 2.7713  | 2.4416 |
| 4/15/2019 8:25 | 0.1    | 2.2917 | 50.7275  | -0.0667 | 17.3878 | 43.0909 | 2.5708  | 2.3782 |
| 4/15/2019 8:26 | 0.1    | 3.1167 | 51.5467  | -0.0667 | 17.4069 | 42.5    | 2.4926  | 2.4044 |
| 4/15/2019 8:27 | 0.1    | 2.4083 | 55.9817  | 0.05    | 18.1617 | 41.99   | 2.5786  | 2.4313 |
| 4/15/2019 8:28 | 0.1417 | 2.0667 | 53.7933  | 0.2667  | 17.843  | 41.6333 | 2.5042  | 2.4614 |
| 4/15/2019 8:29 | 0.1167 | 2.6167 | 50.8233  | -0.3167 | 17.4668 | 41.325  | 2.4511  | 2.4604 |
| 4/15/2019 8:30 | 0.1    | 2.6833 | 50.03    | 0.4833  | 17.398  | 40.8818 | 2.4062  | 2.4493 |
| 4/15/2019 8:31 | 0.1    | 2.3333 | 48.14    | 0.6     | 17.3653 | 40.2583 | 2.3482  | 2.4038 |
| 4/15/2019 8:32 | 0.1    | 2.4917 | 46.0033  | 0.0667  | 16.6425 | 40.1    | 2.3313  | 2.3713 |
| 4/15/2019 8:33 | 0.1833 | 2.6417 | 44.6767  | 0.15    | 16.1675 | 39.7667 | 2.2672  | 2.3813 |
| 4/15/2019 8:34 | 0.2    | 2.4333 | 42.9617  | 0.25    | 15.8478 | 39.3    | 2.2773  | 2.3699 |

|                |        |        |         |         |         |         |        |        |
|----------------|--------|--------|---------|---------|---------|---------|--------|--------|
| 4/15/2019 8:35 | 0.2    | 2.7083 | 39.9817 | 0.3     | 15.4326 | 38.81   | 2.1695 | 2.3543 |
| 4/15/2019 8:36 | 0.2    | 2.4417 | 42.2367 | 0.1333  | 15.6033 | 38.3    | 2.2241 | 2.3871 |
| 4/15/2019 8:37 | 0.25   | 3.1083 | 42.3    | 0.1667  | 15.5761 | 37.9    | 2.2268 | 2.389  |
| 4/15/2019 8:38 | 0.2667 | 2.3333 | 37.9833 | -0.6833 | 14.8959 | 37.4444 | 2.0721 | 2.3647 |
| 4/15/2019 8:39 | 0.3    | 2      | 37.0233 | -0.4333 | 14.6954 | 36.8182 | 2.0573 | 2.3661 |
| 4/15/2019 8:40 | 0.2917 | 2.0083 | 41.8883 | -0.15   | 15.3891 | 36.27   | 2.2223 | 2.434  |
| 4/15/2019 8:41 | 0.25   | 2.925  | 42.4267 | 0.5     | 15.5423 | 35.9417 | 2.2642 | 2.4493 |
| 4/15/2019 8:42 | 0.2    | 2.2    | 41.2583 | 0.1667  | 15.3516 | 35.74   | 2.2492 | 2.4749 |
| 4/15/2019 8:43 | 0.2    | 2.1667 | 37.6217 | -0.7333 | 14.6917 | 35.43   | 2.105  | 2.4241 |
| 4/15/2019 8:44 | 0.2    | 2.4667 | 36.9183 | -0.2333 | 14.4553 | 35.0727 | 2.0832 | 2.3868 |
| 4/15/2019 8:45 | 0.2    | 2.4083 | 32.8983 | -0.2667 | 13.8507 | 34.6667 | 1.9603 | 2.3466 |
| 4/15/2019 8:46 | 0.2417 | 2.8083 | 31.56   | -0.1    | 13.4403 | 34.04   | 1.8933 | 2.3171 |
| 4/15/2019 8:47 | 0.3    | 2.975  | 31.155  | -0.1167 | 13.3992 | 33.4545 | 1.897  | 2.2984 |
| 4/15/2019 8:48 | 0.275  | 3.1333 | 31.975  | 0.3833  | 13.4392 | 33.05   | 1.9273 | 2.333  |
| 4/15/2019 8:49 | 0.2    | 2.85   | 32.4767 | -0.0167 | 13.5033 | 32.5917 | 1.9655 | 2.3613 |
| 4/15/2019 8:50 | 0.2    | 2.5333 | 32.0817 | 0.2167  | 13.4303 | 32.2909 | 1.9403 | 2.3538 |
| 4/15/2019 8:51 | 0.2417 | 2.5917 | 29.6033 | 0.2667  | 13.0097 | 31.9818 | 1.8443 | 2.3133 |
| 4/15/2019 8:52 | 0.2583 | 2.3083 | 30.6083 | -0.0667 | 12.9355 | 31.4083 | 1.8762 | 2.3621 |
| 4/15/2019 8:53 | 0.2    | 2.6833 | 31.7733 | -0.2    | 13.326  | 31      | 1.9733 | 2.4235 |
| 4/15/2019 8:54 | 0.2    | 2.1333 | 32.87   | 0       | 13.4253 | 30.62   | 2.0002 | 2.4215 |
| 4/15/2019 8:55 | 0.2    | 2.2417 | 32.8233 | -0.2333 | 13.3599 | 30.35   | 1.9954 | 2.4336 |
| 4/15/2019 8:56 | 0.2    | 2.4583 | 31.0083 | 0.0167  | 13.0802 | 30.1909 | 1.9478 | 2.4043 |
| 4/15/2019 8:57 | 0.2417 | 2.4    | 28.2017 | 0.0333  | 12.5328 | 29.79   | 1.8307 | 2.3417 |
| 4/15/2019 8:58 | 0.3    | 3.1833 | 26.9183 | 0.2667  | 12.2243 | 29.5636 | 1.7463 | 2.315  |
| 4/15/2019 8:59 | 0.3    | 2.7583 | 26.9833 | -0.4    | 12.2042 | 29.4167 | 1.7831 | 2.3368 |
| 4/15/2019 9:00 | 0.3    | 2      | 26.595  | 0.3833  | 12.0754 | 29.1909 | 1.7703 | 2.3378 |
| 4/15/2019 9:01 | 0.2083 | 2.275  | 26.735  | -0.35   | 12.0789 | 28.8636 | 1.7741 | 2.3481 |
| 4/15/2019 9:02 | 0.2    | 3.0333 | 25.3617 | -0.4167 | 11.8772 | 28.4636 | 1.7409 | 2.3108 |
| 4/15/2019 9:03 | 0.1333 | 2.6917 | 24.7783 | -0.5    | 11.7033 | 28.0889 | 1.7037 | 2.3118 |
| 4/15/2019 9:04 | 0.1    | 2.325  | 24.9983 | -0.3333 | 11.6833 | 27.9727 | 1.6897 | 2.3173 |
| 4/15/2019 9:05 | 0.1    | 2.0583 | 24.175  | 0.7833  | 11.4813 | 27.6222 | 1.6759 | 2.3087 |
| 4/15/2019 9:06 | 0.1    | 1.7    | 24.3517 | -0.4333 | 11.4776 | 27.14   | 1.7058 | 2.3    |
| 4/15/2019 9:07 | 0.1    | 2.6    | 25.5767 | -0.0833 | 11.6534 | 26.7083 | 1.7342 | 2.3389 |
| 4/15/2019 9:08 | 0.1    | 2.5167 | 26.285  | -0.05   | 11.7653 | 26.3    | 1.7867 | 2.3783 |
| 4/15/2019 9:09 | 0.1167 | 2.525  | 25.285  | -0.2167 | 11.5852 | 26.0583 | 1.7526 | 2.356  |
| 4/15/2019 9:10 | 0.1917 | 2.8833 | 25.7233 | -0.2    | 11.6645 | 26.0273 | 1.7663 | 2.3612 |
| 4/15/2019 9:11 | 0.2    | 2.8333 | 24.735  | 0.3     | 11.4794 | 25.925  | 1.7215 | 2.3797 |
| 4/15/2019 9:12 | 0.2    | 2      | 24.4183 | 0.35    | 11.3754 | 25.7909 | 1.7278 | 2.3741 |
| 4/15/2019 9:13 | 0.1583 | 2.5667 | 22.56   | 0.1833  | 10.9913 | 25.6273 | 1.6097 | 2.3074 |
| 4/15/2019 9:14 | 0.1    | 2.625  | 22.0717 | -0.0333 | 10.8108 | 25.41   | 1.6043 | 2.289  |
| 4/15/2019 9:15 | 0.1083 | 2.8417 | 22.665  | -0.2833 | 10.9014 | 25.3091 | 1.644  | 2.3213 |
| 4/15/2019 9:16 | 0.1833 | 1.9833 | 20.9783 | -0.75   | 10.6725 | 25.1091 | 1.565  | 2.3028 |
| 4/15/2019 9:17 | 0.2    | 2.5083 | 19.9467 | -0.1333 | 10.4754 | 24.8455 | 1.5313 | 2.3031 |
| 4/15/2019 9:18 | 0.2    | 2.375  | 20.8083 | 0.2667  | 10.5407 | 24.62   | 1.556  | 2.3424 |
| 4/15/2019 9:19 | 0.1917 | 2.8167 | 20.235  | 0.3333  | 10.473  | 24.2727 | 1.5533 | 2.3607 |
| 4/15/2019 9:20 | 0.1917 | 2.5167 | 20.2883 | 0       | 10.4203 | 23.9625 | 1.5563 | 2.3561 |
| 4/15/2019 9:21 | 0.2    | 2.3583 | 20.7967 | -0.2    | 10.4343 | 23.6727 | 1.5488 | 2.3308 |

|                 |         |         |         |         |         |         |        |        |
|-----------------|---------|---------|---------|---------|---------|---------|--------|--------|
| 4/15/2019 9:22  | 0.2     | 3.05    | 19.36   | 0.5667  | 10.2307 | 23.2455 | 1.494  | 2.3118 |
| 4/15/2019 9:23  | 0.2     | 2.8583  | 18.3733 | 0.55    | 9.9312  | 22.7818 | 1.4028 | 2.2664 |
| 4/15/2019 9:24  | 0.2583  | 2.4833  | 18.0983 | 0.2     | 10.3508 | 22.1636 | 1.3472 | 2.2468 |
| 4/15/2019 9:25  | 0.3833  | 2.7917  | 17.215  | 0.4667  | 11.005  | 21.5    | 1.2357 | 2.2375 |
| 4/15/2019 9:26  | 0.6417  | 3.2167  | 13.5583 | 0.9     | 10.7006 | 20.51   | 0.9794 | 2.0933 |
| 4/15/2019 9:27  | 0.9583  | 4.2667  | 13.205  | 1.0167  | 10.9116 | 19.3909 | 0.9184 | 2.0789 |
| 4/15/2019 9:28  | 1.325   | 4.2     | 12.195  | 1.35    | 10.5485 | 18.1091 | 0.7968 | 1.9752 |
| 4/15/2019 9:29  | 1.6583  | 5.0333  | 11.14   | 2.2167  | 10.1958 | 16.64   | 0.7106 | 1.9162 |
| 4/15/2019 9:30  | 2       | 4.6167  | 11.1917 | 2.55    | 10.2551 | 15.3455 | 0.6912 | 1.9505 |
| 4/15/2019 9:31  | 2.3083  | 5.475   | 10.4752 | 3.6167  | 10.292  | 13.95   | 0.6136 | 1.9308 |
| 4/15/2019 9:32  | 2.6     | 5.1417  | 10.7983 | 3.0667  | 10.2944 | 12.57   | 0.6141 | 1.8919 |
| 4/15/2019 9:33  | 2.825   | 6.7083  | 11.1833 | 3.75    | 9.9993  | 11.02   | 0.6004 | 1.9288 |
| 4/15/2019 9:34  | 3.05    | 7.8     | 11.2217 | 3.75    | 9.1625  | 9.4545  | 0.5379 | 1.8369 |
| 4/15/2019 9:35  | 3.4833  | 7.6     | 10.78   | 4.5333  | 8.0555  | 8.0556  | 0.4687 | 1.8081 |
| 4/15/2019 9:36  | 3.9333  | 8.1583  | 10.8117 | 4.8     | 8.1801  | 6.8     | 0.4574 | 1.7943 |
| 4/15/2019 9:37  | 4.25    | 8.5     | 10.6117 | 5.4333  | 7.9233  | 5.5636  | 0.4355 | 1.7697 |
| 4/15/2019 9:38  | 4.6     | 8.6667  | 10.5083 | 5.4     | 7.1927  | 4.6     | 0.3982 | 1.7518 |
| 4/15/2019 9:39  | 5.075   | 9.05    | 10.9517 | 6.2833  | 6.826   | 3.9333  | 0.3407 | 1.7345 |
| 4/15/2019 9:40  | 5.6833  | 10.2167 | 11.3833 | 6.5     | 6.3769  | 3.42    | 0.3323 | 1.7432 |
| 4/15/2019 9:41  | 6.175   | 10.2583 | 11.16   | 7.3     | 6.1135  | 3.17    | 0.3177 | 1.7841 |
| 4/15/2019 9:42  | 6.5833  | 10.2167 | 11.525  | 7.7333  | 6.1901  | 2.81    | 0.294  | 1.7525 |
| 4/15/2019 9:43  | 6.9167  | 10.8333 | 12.0017 | 7.6667  | 5.9339  | 2.54    | 0.2917 | 1.7748 |
| 4/15/2019 9:44  | 7.2583  | 10.9917 | 12.1817 | 8.65    | 5.6375  | 2.36    | 0.266  | 1.7326 |
| 4/15/2019 9:45  | 7.6     | 11.3667 | 12.145  | 8.5333  | 5.535   | 2.17    | 0.2547 | 1.7127 |
| 4/15/2019 9:46  | 7.725   | 10.8417 | 11.7017 | 7.7     | 5.8378  | 2.0182  | 0.2585 | 1.697  |
| 4/15/2019 9:47  | 7.8     | 11.25   | 12.17   | 8.9667  | 6.5654  | 1.9667  | 0.2297 | 1.6872 |
| 4/15/2019 9:48  | 8.0917  | 11.925  | 12.5867 | 9.6833  | 6.3738  | 1.85    | 0.2136 | 1.684  |
| 4/15/2019 9:49  | 8.675   | 12.725  | 13.0217 | 10.3833 | 5.791   | 1.7727  | 0.1983 | 1.6545 |
| 4/15/2019 9:50  | 9.575   | 13.3333 | 13.9083 | 11.7667 | 5.2282  | 1.6909  | 0.1707 | 1.6109 |
| 4/15/2019 9:51  | 10.2667 | 13.75   | 13.7017 | 11.1167 | 5.3225  | 1.6     | 0.1699 | 1.6188 |
| 4/15/2019 9:52  | 10.6833 | 14.2167 | 14.2117 | 11.1    | 5.1832  | 1.5636  | 0.1529 | 1.6241 |
| 4/15/2019 9:53  | 10.85   | 14.9417 | 13.805  | 11.9667 | 5.0158  | 1.4545  | 0.1464 | 1.5806 |
| 4/15/2019 9:54  | 10.9917 | 14.2667 | 13.3917 | 11.6167 | 4.5925  | 1.4     | 0.1519 | 1.5947 |
| 4/15/2019 9:55  | 11.1    | 14.1583 | 13.8542 | 11.3333 | 4.6787  | 1.4     | 0.1358 | 1.6135 |
| 4/15/2019 9:56  | 11.275  | 14.7417 | 14.8392 | 11.9167 | 4.5139  | 1.3182  | 0.1372 | 1.6069 |
| 4/15/2019 9:57  | 11.3917 | 14.3417 | 14.5767 | 12.0333 | 4.371   | 1.3     | 0.1305 | 1.5989 |
| 4/15/2019 9:58  | 11.625  | 14.7083 | 14.6133 | 12.6667 | 4.3511  | 1.2875  | 0.1269 | 1.5621 |
| 4/15/2019 9:59  | 11.8    | 15.625  | 15.0792 | 12.6667 | 4.3048  | 1.2     | 0.1202 | 1.5937 |
| 4/15/2019 10:00 | 11.975  | 15.0417 | 15.0267 | 12.6    | 4.2563  | 1.1444  | 0.1122 | 1.6191 |
| 4/15/2019 10:01 | 12.25   | 15.6583 | 14.2183 | 12.9667 | 4.1656  | 1.1     | 0.1126 | 1.6309 |
| 4/15/2019 10:02 | 12.4667 | 16.075  | 15.5983 | 13.7833 | 4.1041  | 1.1     | 0.1132 | 1.6642 |
| 4/15/2019 10:03 | 12.9083 | 16.8    | 16.0742 | 14.05   | 4.0511  | 1.1     | 0.0972 | 1.6544 |
| 4/15/2019 10:04 | 13.325  | 16.5917 | 16.0008 | 14.7    | 4.0366  | 1.1     | 0.1022 | 1.6348 |
| 4/15/2019 10:05 | 13.5667 | 16.7167 | 15.9075 | 14.35   | 4.0002  | 1.1     | 0.1005 | 1.6458 |
| 4/15/2019 10:06 | 13.5083 | 16.4083 | 15.9025 | 13.95   | 3.9797  | 1.1     | 0.0918 | 1.655  |
| 4/15/2019 10:07 | 13.3083 | 16.325  | 15.6142 | 13.5167 | 3.9778  | 1.1     | 0.1077 | 1.6555 |
| 4/15/2019 10:08 | 13.0417 | 15.8917 | 15.2483 | 13.55   | 3.9677  | 1.1     | 0.0946 | 1.6608 |

|                 |         |         |         |         |         |          |        |        |
|-----------------|---------|---------|---------|---------|---------|----------|--------|--------|
| 4/15/2019 10:09 | 12.7917 | 16.0333 | 15.18   | 13.15   | 3.9488  | 1.1      | 0.1019 | 1.6728 |
| 4/15/2019 10:10 | 12.5417 | 15.45   | 15.0258 | 12.3667 | 3.9673  | 1.1      | 0.1041 | 1.6641 |
| 4/15/2019 10:11 | 12.1667 | 14.5917 | 14.4367 | 12.0167 | 3.9647  | 1.1      | 0.1071 | 1.6852 |
| 4/15/2019 10:12 | 11.8833 | 14.1083 | 14.2875 | 12.0167 | 3.951   | 1.1      | 0.1157 | 1.7073 |
| 4/15/2019 10:13 | 11.5    | 13.6167 | 13.9883 | 11.5833 | 3.9223  | 1.1      | 0.0999 | 1.7193 |
| 4/15/2019 10:14 | 11.1333 | 13.3333 | 13.4908 | 10.7167 | 3.9018  | 1.1      | 0.1192 | 1.7288 |
| 4/15/2019 10:15 | 10.575  | 12.8833 | 12.8117 | 10.1167 | 3.9789  | 1.1583   | 0.128  | 1.7235 |
| 4/15/2019 10:16 | 9.85    | 11.2833 | 14.4933 | 9       | 11.4176 | 14.57    | 0.2271 | 1.7646 |
| 4/15/2019 10:17 | 8.575   | 8.8167  | 15.5692 | 6.7333  | 23.7007 | 42.7636  | 0.5457 | 1.8177 |
| 4/15/2019 10:18 | 6.75    | 6.6333  | 27.9792 | 3.85    | 34.2278 | 46.68    | 1.6436 | 1.9156 |
| 4/15/2019 10:19 | 4.1417  | 3.5083  | 59.4992 | 2.15    | 44.0584 | 78.52    | 4.8842 | 2.2686 |
| 4/15/2019 10:20 | 1.9917  | 2.6417  | 38.9633 | 1.05    | 44.0201 | 102.1333 | 5.9062 | 2.2918 |
| 4/15/2019 10:21 | 0.6333  | 1.7917  | 30.3992 | 0.0833  | 42.5418 | 97.2889  | 5.5848 | 2.2048 |
| 4/15/2019 10:22 | 0.325   | 3.1583  | 27.8042 | 0.4333  | 41.0215 | 89.4273  | 4.5212 | 2.121  |
| 4/15/2019 10:23 | 0.3417  | 2.9167  | 27.3083 | 0.8667  | 39.8598 | 81.73    | 4.0155 | 2.1093 |
| 4/15/2019 10:24 | 0.4     | 2.45    | 27.265  | 0.5167  | 41.5911 | 81.5333  | 3.7133 | 2.1298 |
| 4/15/2019 10:25 | 0.4     | 2.7583  | 27.595  | 1.15    | 42.1461 | 81.68    | 3.6015 | 2.1166 |
| 4/15/2019 10:26 | 0.35    | 2.6917  | 28.2233 | 0.3833  | 43.6343 | 83.8     | 3.333  | 2.1347 |
| 4/15/2019 10:27 | 0.3     | 2.675   | 27.0033 | -0.2167 | 42.1973 | 83.7     | 3.2703 | 2.136  |
| 4/15/2019 10:28 | 0.2833  | 2.325   | 25.685  | 0.3167  | 41.3165 | 81.5     | 3.2082 | 2.117  |
| 4/15/2019 10:29 | 0.3     | 1.7917  | 24.9958 | 0.3     | 39.9417 | 81.1091  | 3.095  | 2.1043 |
| 4/15/2019 10:30 | 0.3     | 2.7667  | 23.2292 | 0.5667  | 37.8513 | 80.54    | 2.9362 | 2.0785 |
| 4/15/2019 10:31 | 0.3     | 3.3273  | 21.3417 | -0.1333 | 35.1945 | 79.7     | 2.762  | 2.0816 |
| 4/15/2019 10:32 | 0.3     | 1.14    | 20.5642 | 1.0333  | 34.6    | 78.67    | 2.694  | 2.0748 |
| 4/15/2019 10:33 | 0.3     | 2.8833  | 20.0342 | 0.1167  | 34.6    | 77.3111  | 2.6167 | 2.0696 |
| 4/15/2019 10:34 | 0.3     | 2.4333  | 20.0225 | -0.0667 | 34.4948 | 76.0444  | 2.588  | 2.0851 |
| 4/15/2019 10:35 | 0.3     | 2.1833  | 19.4867 | 0.2833  | 33.7078 | 74.8727  | 2.5838 | 2.0729 |
| 4/15/2019 10:36 | 0.3     | 2.7333  | 19.3908 | 0.4667  | 33.8546 | 73.6     | 2.5928 | 2.097  |
| 4/15/2019 10:37 | 0.3     | 2.4667  | 18.5708 | 0.2333  | 32.8778 | 72.1273  | 2.5375 | 2.0962 |
| 4/15/2019 10:38 | 0.3     | 2.9     | 18.8175 | 0.1667  | 32.858  | 70.68    | 2.5423 | 2.0985 |
| 4/15/2019 10:39 | 0.2583  | 2.7167  | 20.1175 | 0.2167  | 35.2319 | 69.8     | 2.7458 | 2.1226 |
| 4/15/2019 10:40 | 0.2     | 2.5667  | 19.5625 | -0.0333 | 34.4267 | 68.7667  | 2.7078 | 2.1206 |
| 4/15/2019 10:41 | 0.1917  | 2.7     | 19.4608 | 0.1     | 33.9134 | 67.75    | 2.6547 | 2.1381 |
| 4/15/2019 10:42 | 0.1417  | 3.0667  | 19.2592 | 0.0667  | 33.5173 | 67.0818  | 2.6608 | 2.1288 |
| 4/15/2019 10:43 | 0.15    | 2.3833  | 18.1883 | 0.0333  | 32.9498 | 66.6546  | 2.601  | 2.1101 |
| 4/15/2019 10:44 | 0.2     | 2.65    | 17.32   | -0.0167 | 31.6028 | 66.24    | 2.4808 | 2.1056 |
| 4/15/2019 10:45 | 0.2167  | 2.9     | 16.9417 | 0.1     | 30.9611 | 65.8818  | 2.4655 | 2.1194 |
| 4/15/2019 10:46 | 0.2667  | 2.5333  | 16.7275 | -0.2    | 30.529  | 65.56    | 2.4357 | 2.1392 |
| 4/15/2019 10:47 | 0.3     | 2.5     | 16.1067 | -0.25   | 29.6146 | 65       | 2.3557 | 2.0996 |
| 4/15/2019 10:48 | 0.325   | 2.5667  | 15.5883 | -0.3833 | 28.993  | 64.2909  | 2.3242 | 2.1178 |
| 4/15/2019 10:49 | 0.3     | 2.7     | 16.025  | -0.3333 | 29.7682 | 64       | 2.3975 | 2.1294 |
| 4/15/2019 10:50 | 0.3     | 3.25    | 14.7525 | -0.1667 | 28.2681 | 63.5182  | 2.2795 | 2.1203 |
| 4/15/2019 10:51 | 0.3     | 2.6167  | 14.3767 | -0.1333 | 27.5739 | 62.5333  | 2.2432 | 2.0983 |
| 4/15/2019 10:52 | 0.3     | 2.8333  | 14.54   | 0.0333  | 27.5799 | 61.31    | 2.224  | 2.1025 |
| 4/15/2019 10:53 | 0.275   | 2.3667  | 16.155  | -0.2    | 29.8677 | 60.78    | 2.4595 | 2.1635 |
| 4/15/2019 10:54 | 0.2     | 2.6     | 15.8825 | -0.1833 | 29.7121 | 60.2636  | 2.4432 | 2.178  |
| 4/15/2019 10:55 | 0.275   | 1.9667  | 15.3408 | -0.3833 | 28.7931 | 59.58    | 2.3747 | 2.1488 |



|                 |        |        |         |         |         |         |        |        |
|-----------------|--------|--------|---------|---------|---------|---------|--------|--------|
| 4/15/2019 10:56 | 0.275  | 2.2833 | 14.9592 | 0.2833  | 28.3582 | 59.09   | 2.3503 | 2.1401 |
| 4/15/2019 10:57 | 0.25   | 2.2667 | 14.0333 | 0.1333  | 27.3253 | 58.49   | 2.2557 | 2.1341 |
| 4/15/2019 10:58 | 0.2    | 2.6667 | 13.895  | 0.0667  | 26.5618 | 57.96   | 2.2172 | 2.1388 |
| 4/15/2019 10:59 | 0.2    | 2.7    | 13.0667 | -0.1    | 25.4887 | 57.3455 | 2.1303 | 2.105  |
| 4/15/2019 11:00 | 0.2    | 1.8667 | 12.7933 | 0.0167  | 24.7808 | 56.8    | 2.0698 | 2.086  |
| 4/15/2019 11:01 | 0.2333 | 2.8333 | 12.5308 | -0.1667 | 25.0182 | 56.2    | 2.0965 | 2.0888 |
| 4/15/2019 11:02 | 0.2    | 2.3    | 13.0225 | -0.2333 | 25.5218 | 55.65   | 2.1393 | 2.1154 |
| 4/15/2019 11:03 | 0.2    | 3.5    | 13.0167 | -0.0667 | 25.2998 | 55.3091 | 2.1448 | 2.1148 |
| 4/15/2019 11:04 | 0.2    | 3.8667 | 12.3067 | -0.4833 | 24.3865 | 54.8889 | 2.0698 | 2.1111 |
| 4/15/2019 11:05 | 0.1    | 2.9    | 12.1    | -0.0167 | 24.1735 | 54.1909 | 2.0513 | 2.1252 |
| 4/15/2019 11:06 | 0.1    | 2.4667 | 11.6958 | -0.4167 | 23.7074 | 53.12   | 2.0045 | 2.1104 |
| 4/15/2019 11:07 | 0.1    | 2.0333 | 12.6008 | -0.4833 | 24.8608 | 52.4818 | 2.1325 | 2.1368 |
| 4/15/2019 11:08 | 0.1    | 2.2    | 13.1342 | -0.1833 | 25.0765 | 51.9818 | 2.1595 | 2.161  |
| 4/15/2019 11:09 | 0.0333 | 2.1667 | 12.3667 | 0.1667  | 24.7784 | 51.6818 | 2.1339 | 2.1458 |
| 4/15/2019 11:10 | 0      | 2.5333 | 11.865  | -0.5167 | 24.0438 | 51.4333 | 2.0768 | 2.1312 |
| 4/15/2019 11:11 | 0.0167 | 2.35   | 11.4083 | -0.0833 | 23.4987 | 51.18   | 2.0243 | 2.1116 |
| 4/15/2019 11:12 | 0.1    | 2.75   | 11.0825 | -0.55   | 22.3679 | 50.7727 | 1.9333 | 2.1009 |
| 4/15/2019 11:13 | 0.1    | 2.95   | 10.8083 | 0.1167  | 21.9937 | 50.5    | 1.9    | 2.0838 |
| 4/15/2019 11:14 | 0.1083 | 2.4333 | 10.6725 | -0.9333 | 22.0578 | 50.05   | 1.9398 | 2.1118 |
| 4/15/2019 11:15 | 0.2    | 2.8667 | 10.1243 | -0.55   | 21.5543 | 49.4727 | 1.871  | 2.102  |
| 4/15/2019 11:16 | 0.2    | 2.6833 | 10.2093 | -0.15   | 21.5829 | 48.9727 | 1.8997 | 2.1194 |
| 4/15/2019 11:17 | 0.2    | 2.5667 | 10.5067 | -0.05   | 21.7053 | 48.5455 | 1.9154 | 2.1387 |
| 4/15/2019 11:18 | 0.2    | 3.05   | 10.7658 | -0.7833 | 21.9038 | 48.31   | 1.9329 | 2.1828 |
| 4/15/2019 11:19 | 0.2    | 2.3167 | 11.1092 | -0.15   | 22.1297 | 48.0909 | 1.98   | 2.1713 |
| 4/15/2019 11:20 | 0.2    | 2.5667 | 11.1275 | -0.8667 | 22.2079 | 47.71   | 1.9784 | 2.1922 |
| 4/15/2019 11:21 | 0.2    | 2.0667 | 10.7708 | -0.2833 | 21.778  | 47.22   | 1.9358 | 2.1642 |
| 4/15/2019 11:22 | 0.2    | 2.7833 | 10.8817 | -0.0833 | 21.5982 | 46.76   | 1.9508 | 2.1597 |
| 4/15/2019 11:23 | 0.25   | 2.6833 | 10.59   | 0.15    | 21.0679 | 46.3083 | 1.8943 | 2.1683 |
| 4/15/2019 11:24 | 0.3    | 3.0833 | 10.2583 | -0.2667 | 20.6404 | 46.08   | 1.8559 | 2.1693 |
| 4/15/2019 11:25 | 0.3    | 2.7167 | 9.9033  | -0.1833 | 20.2092 | 45.8111 | 1.8296 | 2.1458 |
| 4/15/2019 11:26 | 0.3167 | 2.4667 | 9.5377  | -0.0167 | 19.7254 | 45.3333 | 1.7902 | 2.1527 |
| 4/15/2019 11:27 | 0.3    | 2.3333 | 9.435   | -0.5    | 19.3951 | 45.0182 | 1.7723 | 2.1458 |
| 4/15/2019 11:28 | 0.3    | 2.2833 | 9.1382  | -0.0833 | 19.5602 | 44.72   | 1.7813 | 2.1402 |
| 4/15/2019 11:29 | 0.2417 | 2.35   | 8.664   | -0.2    | 19.7653 | 44.52   | 1.8083 | 2.1553 |
| 4/15/2019 11:30 | 0.225  | 2.6333 | 9.0603  | -0.7333 | 19.4753 | 44.1818 | 1.7889 | 2.1649 |
| 4/15/2019 11:31 | 0.2    | 2.7667 | 9.1228  | -0.15   | 19.1931 | 43.7727 | 1.7425 | 2.156  |
| 4/15/2019 11:32 | 0.2    | 1.9667 | 9.7273  | 0.2333  | 19.5434 | 43.2417 | 1.8064 | 2.1719 |
| 4/15/2019 11:33 | 0.175  | 2.1333 | 9.3938  | 0.4333  | 19.657  | 42.8    | 1.7614 | 2.1718 |
| 4/15/2019 11:34 | 0.1    | 2.2333 | 9.323   | -0.7667 | 19.657  | 42.41   | 1.7892 | 2.1707 |
| 4/15/2019 11:35 | 0.125  | 1.9333 | 9.6535  | -0.35   | 19.2369 | 41.9727 | 1.762  | 2.1762 |
| 4/15/2019 11:36 | 0.2    | 2.85   | 8.945   | -0.5333 | 18.7235 | 41.6364 | 1.7336 | 2.1598 |
| 4/15/2019 11:37 | 0.2833 | 3.15   | 8.6317  | -0.2833 | 17.4007 | 41.1    | 1.5913 | 2.1094 |
| 4/15/2019 11:38 | 0.6667 | 3.8667 | 8.7217  | 1.65    | 15.952  | 40.0455 | 1.3374 | 2.0582 |
| 4/15/2019 11:39 | 1.3667 | 5.8    | 8.2445  | 2.15    | 15.3542 | 38.83   | 1.1747 | 1.999  |
| 4/15/2019 11:40 | 2.075  | 5.0667 | 7.9867  | 2.8167  | 14.8708 | 36.9545 | 1.0386 | 1.9257 |
| 4/15/2019 11:41 | 2.6667 | 6.0833 | 8.0072  | 3.8     | 14.7373 | 35.0091 | 0.9024 | 1.8869 |
| 4/15/2019 11:42 | 3.2333 | 7.4833 | 8.6162  | 4.25    | 14.2793 | 32.5    | 0.8061 | 1.8481 |

|                 |         |         |         |         |         |         |        |        |
|-----------------|---------|---------|---------|---------|---------|---------|--------|--------|
| 4/15/2019 11:43 | 3.825   | 7.5333  | 8.6445  | 4.25    | 13.9961 | 30      | 0.7496 | 1.8256 |
| 4/15/2019 11:44 | 4.15    | 6.9     | 8.1633  | 4.1     | 15.1703 | 27.4    | 0.7465 | 1.779  |
| 4/15/2019 11:45 | 4.0917  | 7.4167  | 8.0525  | 4.2     | 16.6457 | 24.7909 | 0.7553 | 1.7852 |
| 4/15/2019 11:46 | 4.2545  | 8.3667  | 8.8457  | 5.6333  | 14.8799 | 22.2    | 0.6116 | 1.7373 |
| 4/15/2019 11:47 | 4.575   | 8.4     | 8.7255  | 5.6     | 14.3363 | 19.3    | 0.5719 | 1.7323 |
| 4/15/2019 11:48 | 4.9833  | 8.0833  | 8.4455  | 5.2667  | 15.0873 | 16.46   | 0.5555 | 1.7424 |
| 4/15/2019 11:49 | 5.225   | 8.8167  | 8.7745  | 6       | 15.1914 | 13.8818 | 0.4864 | 1.7007 |
| 4/15/2019 11:50 | 5.575   | 8.95    | 9.2432  | 6.5333  | 14.7878 | 11.58   | 0.4504 | 1.6892 |
| 4/15/2019 11:51 | 6.15    | 9.5167  | 9.199   | 6.9     | 14.4179 | 9.93    | 0.397  | 1.7015 |
| 4/15/2019 11:52 | 6.65    | 10.5833 | 9.855   | 7.4833  | 13.9582 | 8.4545  | 0.3834 | 1.689  |
| 4/15/2019 11:53 | 7       | 10.3167 | 9.6203  | 7.9167  | 13.5509 | 7.3     | 0.3754 | 1.6703 |
| 4/15/2019 11:54 | 7.5     | 12.1    | 11.4067 | 9.2167  | 12.6278 | 6.3667  | 0.3231 | 1.6254 |
| 4/15/2019 11:55 | 7.9333  | 11.6667 | 10.825  | 8.5333  | 12.7022 | 5.6364  | 0.3141 | 1.6393 |
| 4/15/2019 11:56 | 8.2167  | 11.0667 | 10.3413 | 8.2833  | 13.3382 | 4.94    | 0.3174 | 1.6863 |
| 4/15/2019 11:57 | 8.3583  | 11.4    | 10.2793 | 8.9667  | 12.5684 | 4.3545  | 0.2917 | 1.6569 |
| 4/15/2019 11:58 | 8.4167  | 11.5167 | 10.5133 | 8.9833  | 11.9708 | 3.84    | 0.2871 | 1.6468 |
| 4/15/2019 11:59 | 8.6417  | 11.8167 | 11.1    | 9.6833  | 11.7873 | 3.47    | 0.2764 | 1.6457 |
| 4/15/2019 12:00 | 9.2083  | 13.4167 | 11.87   | 10.5167 | 10.4878 | 3.1273  | 0.2489 | 1.6304 |
| 4/15/2019 12:01 | 9.85    | 13.3333 | 12.7383 | 10.8167 | 9.9375  | 2.8     | 0.2413 | 1.6137 |
| 4/15/2019 12:02 | 10.7667 | 15.1    | 13.7633 | 12.1167 | 9.2134  | 2.5333  | 0.2167 | 1.6034 |
| 4/15/2019 12:03 | 11.4667 | 15.05   | 13.975  | 13.0833 | 8.7424  | 2.3333  | 0.2087 | 1.5932 |
| 4/15/2019 12:04 | 11.9917 | 15.6    | 14.2733 | 12.75   | 8.6224  | 2.11    | 0.1825 | 1.6224 |
| 4/15/2019 12:05 | 12.3417 | 15.5    | 14.495  | 13.4667 | 8.3256  | 2       | 0.1791 | 1.613  |
| 4/15/2019 12:06 | 12.525  | 15.7667 | 14.315  | 12.6333 | 8.4339  | 1.89    | 0.1718 | 1.5858 |
| 4/15/2019 12:07 | 12.8167 | 17      | 14.795  | 13.5167 | 8.0352  | 1.8     | 0.1558 | 1.5954 |
| 4/15/2019 12:08 | 13.1083 | 16      | 14.9817 | 13.8    | 7.3959  | 1.8     | 0.1547 | 1.5993 |
| 4/15/2019 12:09 | 13.3417 | 16.5333 | 15.3267 | 14.4167 | 7.2937  | 1.7273  | 0.1469 | 1.5919 |
| 4/15/2019 12:10 | 13.4917 | 16      | 15.1283 | 14.0333 | 7.2249  | 1.7     | 0.1554 | 1.5706 |
| 4/15/2019 12:11 | 13.5583 | 16.8667 | 15.43   | 13.95   | 6.9298  | 1.6583  | 0.1575 | 1.5636 |
| 4/15/2019 12:12 | 13.7083 | 16.6333 | 15.735  | 14.6167 | 6.976   | 1.6     | 0.1422 | 1.5755 |
| 4/15/2019 12:13 | 13.9333 | 17.1167 | 15.4283 | 14.5333 | 7.0708  | 1.6     | 0.1479 | 1.6013 |
| 4/15/2019 12:14 | 14.4167 | 18.7    | 16.6883 | 15.8333 | 6.664   | 1.6     | 0.1239 | 1.5753 |
| 4/15/2019 12:15 | 14.8417 | 18.15   | 16.205  | 15.35   | 6.442   | 1.6     | 0.1205 | 1.5793 |
| 4/15/2019 12:16 | 15.2917 | 19.5    | 17.2183 | 16.3333 | 6.0556  | 1.6     | 0.1135 | 1.5768 |
| 4/15/2019 12:17 | 15.6833 | 19.1833 | 17.965  | 17.05   | 5.7503  | 1.6     | 0.0896 | 1.5636 |
| 4/15/2019 12:18 | 16.0333 | 19.05   | 17.8517 | 17.35   | 5.672   | 1.6     | 0.0995 | 1.5627 |
| 4/15/2019 12:19 | 16.2583 | 19.3    | 18.215  | 17.6833 | 5.4888  | 1.57    | 0.0987 | 1.5737 |
| 4/15/2019 12:20 | 16.1333 | 18.5667 | 17.3883 | 16.55   | 5.4438  | 1.5     | 0.0894 | 1.5798 |
| 4/15/2019 12:21 | 16      | 19.3333 | 17.8767 | 16.25   | 5.3852  | 1.5     | 0.1099 | 1.5738 |
| 4/15/2019 12:22 | 16.025  | 19.8667 | 18.14   | 17.6    | 5.0263  | 1.5     | 0.0894 | 1.5783 |
| 4/15/2019 12:23 | 16.2917 | 19.1667 | 18.4183 | 17.55   | 4.9012  | 1.43    | 0.1002 | 1.5746 |
| 4/15/2019 12:24 | 16.45   | 19.3    | 18.2633 | 16.4    | 4.8888  | 1.4     | 0.0958 | 1.5887 |
| 4/15/2019 12:25 | 16.5833 | 20.5667 | 18.855  | 17.7667 | 4.6943  | 1.3545  | 0.0802 | 1.5885 |
| 4/15/2019 12:26 | 16.8    | 20.75   | 18.8967 | 17.4667 | 4.5617  | 1.3     | 0.0854 | 1.5997 |
| 4/15/2019 12:27 | 16.7583 | 19.4167 | 17.53   | 15.9833 | 4.7144  | 1.2545  | 0.0879 | 1.5933 |
| 4/15/2019 12:28 | 16.5417 | 18.4667 | 17.8283 | 16.9167 | 4.5908  | 1.2     | 0.0905 | 1.594  |
| 4/15/2019 12:29 | 16.4167 | 19.9    | 18.2467 | 17.6667 | 4.4412  | 1.1909  | 0.089  | 1.5809 |

|                 |         |         |         |         |         |         |        |        |
|-----------------|---------|---------|---------|---------|---------|---------|--------|--------|
| 4/15/2019 12:30 | 16.8583 | 20.2167 | 18.8483 | 18.1167 | 4.2085  | 1.1     | 0.0658 | 1.567  |
| 4/15/2019 12:31 | 17.2    | 20.4833 | 19.2267 | 18.4833 | 4.0413  | 1.1     | 0.0651 | 1.5519 |
| 4/15/2019 12:32 | 17.3083 | 20.4167 | 18.8867 | 17.8667 | 4.0287  | 1.1     | 0.0757 | 1.5774 |
| 4/15/2019 12:33 | 17.1833 | 20.0667 | 18.455  | 17.9833 | 4.0213  | 1.0455  | 0.0688 | 1.5838 |
| 4/15/2019 12:34 | 16.7833 | 19.3167 | 17.8533 | 16      | 4.0464  | 1       | 0.085  | 1.5903 |
| 4/15/2019 12:35 | 16.3083 | 18.1667 | 17.2433 | 16.1333 | 4.047   | 1       | 0.071  | 1.5857 |
| 4/15/2019 12:36 | 15.6333 | 17.4833 | 16.345  | 15.2    | 4.0983  | 1       | 0.0839 | 1.6014 |
| 4/15/2019 12:37 | 15.0583 | 17.2667 | 15.7683 | 15.05   | 4.1599  | 1       | 0.0869 | 1.6158 |
| 4/15/2019 12:38 | 14.775  | 17.6833 | 16.405  | 15.5167 | 4.109   | 1       | 0.0691 | 1.6378 |
| 4/15/2019 12:39 | 14.4583 | 16.4167 | 15.43   | 14.5667 | 4.13    | 1       | 0.0911 | 1.653  |
| 4/15/2019 12:40 | 14.1583 | 16.0667 | 15.2917 | 13.5667 | 4.0932  | 1.09    | 0.0809 | 1.6552 |
| 4/15/2019 12:41 | 13.725  | 15.5167 | 15.3017 | 13.7167 | 4.0774  | 1.1     | 0.0838 | 1.6405 |
| 4/15/2019 12:42 | 13.7333 | 17.2    | 14.8667 | 14.8    | 4.0498  | 1.12    | 0.0895 | 1.6398 |
| 4/15/2019 12:43 | 13.7833 | 16.4833 | 15.405  | 13.6167 | 4.0195  | 1.2     | 0.0759 | 1.6634 |
| 4/15/2019 12:44 | 13.75   | 15.7667 | 14.9983 | 13.8167 | 4.0528  | 1.2     | 0.0894 | 1.7043 |
| 4/15/2019 12:45 | 13.2667 | 15.2833 | 14.2317 | 13.1667 | 3.995   | 1.2545  | 0.0862 | 1.691  |
| 4/15/2019 12:46 | 12.85   | 15      | 14.1067 | 12.5833 | 4.0064  | 1.3     | 0.081  | 1.7101 |
| 4/15/2019 12:47 | 12.35   | 15.4833 | 13.6117 | 12.4333 | 4.016   | 1.3     | 0.0885 | 1.7055 |
| 4/15/2019 12:48 | 11.9333 | 14.5167 | 13.1483 | 11.2833 | 3.9997  | 1.3     | 0.0779 | 1.7059 |
| 4/15/2019 12:49 | 11.475  | 14.1667 | 12.9233 | 10.9333 | 3.9798  | 1.35    | 0.093  | 1.723  |
| 4/15/2019 12:50 | 11.15   | 13.65   | 12.9517 | 11.1167 | 3.9908  | 1.4     | 0.0938 | 1.7783 |
| 4/15/2019 12:51 | 10.825  | 12.3667 | 12.3083 | 10.0167 | 3.9614  | 1.4     | 0.0833 | 1.75   |
| 4/15/2019 12:52 | 10.5583 | 12.3667 | 11.8483 | 10      | 3.9633  | 1.4     | 0.0951 | 1.7511 |
| 4/15/2019 12:53 | 10.3    | 12.6333 | 11.9967 | 10.6833 | 3.927   | 1.4364  | 0.0884 | 1.7468 |
| 4/15/2019 12:54 | 10.1917 | 12.25   | 11.9183 | 10.3167 | 3.939   | 1.5     | 0.0941 | 1.7517 |
| 4/15/2019 12:55 | 10.0667 | 12.5833 | 11.4567 | 9.6333  | 3.907   | 1.5     | 0.0925 | 1.7673 |
| 4/15/2019 12:56 | 9.8667  | 11.7    | 11.6267 | 9.8667  | 3.9174  | 1.55    | 0.0856 | 1.7858 |
| 4/15/2019 12:57 | 9.6583  | 12.0667 | 11.4733 | 9.7667  | 3.9014  | 1.52    | 0.095  | 1.8008 |
| 4/15/2019 12:58 | 9.5333  | 11.9    | 11.2983 | 9.3     | 3.8959  | 1.6     | 0.0865 | 1.7743 |
| 4/15/2019 12:59 | 9.4167  | 11.2    | 11.145  | 9.3167  | 3.8604  | 1.6     | 0.0945 | 1.7889 |
| 4/15/2019 13:00 | 9.35    | 12.0333 | 11.0433 | 9.1167  | 3.8758  | 1.6     | 0.0916 | 1.7923 |
| 4/15/2019 13:01 | 9.1     | 11      | 11.1858 | 7.8333  | 5.2933  | 1.72    | 0.1161 | 1.7989 |
| 4/15/2019 13:02 | 8.175   | 8.7     | 22.0225 | 6.7667  | 24.9019 | 2.76    | 0.429  | 1.8893 |
| 4/15/2019 13:03 | 6.3583  | 6.1833  | 28.9692 | 4.1667  | 27.7515 | 4.8     | 0.7709 | 1.9633 |
| 4/15/2019 13:04 | 4.1917  | 4.5667  | 44.8917 | 3.15    | 47.195  | 39.52   | 1.3979 | 2.0628 |
| 4/15/2019 13:05 | 2.3417  | 3.1167  | 61.6583 | 2.8667  | 57.9042 | 75.7546 | 2.5554 | 2.2667 |
| 4/15/2019 13:06 | 1.2636  | 3.0167  | 49.5925 | 1.6833  | 48.7396 | 75.0909 | 2.0688 | 2.2262 |
| 4/15/2019 13:07 | 0.6417  | 1.6833  | 46.0267 | 1.8333  | 49.65   | 65.2182 | 1.9583 | 2.2081 |
| 4/15/2019 13:08 | 0.4667  | 3.0833  | 55.7433 | 2.7333  | 56.9483 | 85.63   | 3.6688 | 2.4234 |
| 4/15/2019 13:09 | 0.4     | 1.9833  | 53.1142 | 1.4833  | 53.5118 | 87.9818 | 3.2865 | 2.4458 |
| 4/15/2019 13:10 | 0.4     | 3.15    | 48.8658 | 1.6667  | 49.3036 | 80.67   | 3.0058 | 2.3509 |
| 4/15/2019 13:11 | 0.4     | 3.0167  | 51.8058 | 1.4333  | 47.4847 | 75.9727 | 3.6295 | 2.4106 |
| 4/15/2019 13:12 | 0.3667  | 3.1     | 45.9392 | 0.6333  | 46.1112 | 66.1455 | 2.7435 | 2.3242 |
| 4/15/2019 13:13 | 0.3167  | 2.95    | 45.665  | 0.6     | 47.6963 | 69.14   | 2.5742 | 2.3283 |
| 4/15/2019 13:14 | 0.3     | 2.1333  | 45.2692 | 0.6167  | 47.1555 | 69.1818 | 2.7562 | 2.3197 |
| 4/15/2019 13:15 | 0.2583  | 2.8167  | 42.81   | 0.8667  | 44.946  | 65.98   | 2.7288 | 2.2886 |
| 4/15/2019 13:16 | 0.275   | 2.0667  | 40.2383 | 0.6     | 43.0673 | 63.9364 | 2.7018 | 2.2748 |

|                 |        |        |         |         |         |         |        |        |
|-----------------|--------|--------|---------|---------|---------|---------|--------|--------|
| 4/15/2019 13:17 | 0.3    | 2.5667 | 37.5275 | 0.4833  | 41.2727 | 63.6    | 2.5795 | 2.2173 |
| 4/15/2019 13:18 | 0.3    | 2.75   | 35.4967 | 0.5     | 39.5222 | 63.14   | 2.6503 | 2.2198 |
| 4/15/2019 13:19 | 0.3    | 2.2    | 33.7625 | 0.15    | 38.2628 | 62.5909 | 2.6798 | 2.2111 |
| 4/15/2019 13:20 | 0.2583 | 3.0333 | 32.8658 | 0.2667  | 37.2198 | 61.7333 | 2.7313 | 2.1967 |
| 4/15/2019 13:21 | 0.2    | 2.1833 | 33.4517 | 0.2833  | 38.1821 | 61.0909 | 2.6358 | 2.2378 |
| 4/15/2019 13:22 | 0.175  | 2.6    | 33.9642 | 0.7167  | 39.0863 | 60.5333 | 2.721  | 2.2733 |
| 4/15/2019 13:23 | 0.1    | 2.8667 | 31.9483 | 0.1167  | 37.7003 | 59.9083 | 2.6895 | 2.2462 |
| 4/15/2019 13:24 | 0.1333 | 3.2    | 31.1433 | 0.1667  | 36.6098 | 59.2083 | 2.6842 | 2.2278 |
| 4/15/2019 13:25 | 0.2    | 2.2833 | 30.4958 | 0.1833  | 36.9297 | 58.51   | 2.5462 | 2.2104 |
| 4/15/2019 13:26 | 0.2    | 2.8167 | 33.9558 | 0.5333  | 39.3031 | 58.0182 | 2.5162 | 2.2728 |
| 4/15/2019 13:27 | 0.15   | 2.2333 | 33.5208 | 0.4333  | 39.0727 | 57.5727 | 2.5145 | 2.2922 |
| 4/15/2019 13:28 | 0.1    | 2.3333 | 32.1475 | 0.35    | 38.084  | 57.03   | 2.4768 | 2.2873 |
| 4/15/2019 13:29 | 0.1    | 2.9333 | 31.5742 | 0.1833  | 37.789  | 56.64   | 2.4712 | 2.284  |
| 4/15/2019 13:30 | 0.2    | 2.7667 | 29.9117 | -0.0833 | 36.0332 | 56.3167 | 2.3838 | 2.2682 |
| 4/15/2019 13:31 | 0.2083 | 2.6    | 27.8567 | 0.3667  | 34.6177 | 55.9455 | 2.323  | 2.2204 |
| 4/15/2019 13:32 | 0.2833 | 2.7833 | 26.6917 | 0.55    | 33.2756 | 55.5273 | 2.276  | 2.2117 |
| 4/15/2019 13:33 | 0.2    | 3.3667 | 27.3092 | 0.3667  | 33.7928 | 55.2    | 2.3005 | 2.2152 |
| 4/15/2019 13:34 | 0.2    | 3.2667 | 25.9217 | -0.1667 | 32.8208 | 54.4333 | 2.1892 | 2.1883 |
| 4/15/2019 13:35 | 0.225  | 2.55   | 25.4092 | 0.2833  | 32.2949 | 53.7455 | 2.2285 | 2.2156 |
| 4/15/2019 13:36 | 0.3    | 2.8167 | 24.0842 | 0.15    | 32.284  | 53.0667 | 2.1547 | 2.2135 |
| 4/15/2019 13:37 | 0.3    | 3.5    | 23.8717 | 0.6333  | 32.0987 | 52.54   | 2.1422 | 2.2184 |
| 4/15/2019 13:38 | 0.2583 | 2.9    | 24.47   | -0.35   | 31.7495 | 51.8083 | 2.177  | 2.2149 |
| 4/15/2019 13:39 | 0.2    | 3.4333 | 24.9775 | -0.1    | 32.008  | 50.9583 | 2.1722 | 2.2217 |
| 4/15/2019 13:40 | 0.1833 | 2.2    | 25.11   | -0.15   | 32.5183 | 50.2909 | 2.2175 | 2.2358 |
| 4/15/2019 13:41 | 0.125  | 2.0833 | 25.3817 | -0.3667 | 32.3407 | 49.54   | 2.2098 | 2.2421 |
| 4/15/2019 13:42 | 0.1    | 2.6333 | 24.0325 | 0.15    | 31.4561 | 48.9833 | 2.1618 | 2.2627 |
| 4/15/2019 13:43 | 0.1917 | 2.2833 | 24.0408 | -0.35   | 31.2836 | 48.68   | 2.1748 | 2.2383 |
| 4/15/2019 13:44 | 0.2    | 3.0333 | 22.7083 | -0.2333 | 29.959  | 48.3    | 2.0587 | 2.2049 |
| 4/15/2019 13:45 | 0.2    | 2.5    | 22.4033 | 0.3833  | 29.6638 | 47.8333 | 2.0683 | 2.2116 |
| 4/15/2019 13:46 | 0.2    | 2.85   | 21.5608 | 0.15    | 29.0338 | 47.4909 | 2.0182 | 2.2064 |
| 4/15/2019 13:47 | 0.2    | 2      | 21.7025 | 0.1333  | 29.1273 | 47.15   | 2.0238 | 2.2159 |
| 4/15/2019 13:48 | 0.2917 | 2.4667 | 20.6875 | -0.25   | 28.2385 | 46.775  | 1.9808 | 2.2366 |
| 4/15/2019 13:49 | 0.3    | 2.3333 | 20.1592 | 0.2333  | 27.8133 | 46.3417 | 1.9627 | 2.206  |
| 4/15/2019 13:50 | 0.3    | 1.7667 | 19.8908 | 0.0667  | 27.5289 | 45.8417 | 1.9513 | 2.1958 |
| 4/15/2019 13:51 | 0.3    | 2.2667 | 20.68   | -0.1167 | 28.3065 | 45.4909 | 2.0222 | 2.229  |
| 4/15/2019 13:52 | 0.3    | 2.1333 | 20.4175 | 0.5333  | 27.9543 | 45.1083 | 1.977  | 2.2366 |
| 4/15/2019 13:53 | 0.3    | 3.05   | 19.7967 | -0.05   | 27.4431 | 44.64   | 1.9612 | 2.2391 |
| 4/15/2019 13:54 | 0.3    | 2.5333 | 19.22   | -0.1833 | 26.9205 | 44.0364 | 1.938  | 2.2332 |
| 4/15/2019 13:55 | 0.3667 | 1.7833 | 19.7258 | 0.35    | 27.2648 | 43.4917 | 1.9617 | 2.2205 |
| 4/15/2019 13:56 | 0.4    | 3.0667 | 19.985  | -0.2333 | 27.6985 | 43.2    | 1.9945 | 2.2355 |
| 4/15/2019 13:57 | 0.4    | 2.0667 | 19.505  | -0.2833 | 26.9117 | 43.1    | 1.9318 | 2.2742 |
| 4/15/2019 13:58 | 0.4    | 2.6833 | 19.1592 | -0.0333 | 26.3178 | 42.775  | 1.912  | 2.2773 |
| 4/15/2019 13:59 | 0.4    | 3.3    | 17.66   | 0.1     | 25.4764 | 42.6083 | 1.8573 | 2.2656 |
| 4/15/2019 14:00 | 0.4    | 2.6833 | 17.0008 | -0.1667 | 24.5913 | 42.2364 | 1.783  | 2.2651 |
| 4/15/2019 14:01 | 0.4333 | 2.4    | 17.8425 | 0.15    | 25.2503 | 42.0636 | 1.8538 | 2.2783 |
| 4/15/2019 14:02 | 0.5    | 2.8167 | 17.2467 | 0.5167  | 24.8818 | 41.83   | 1.8238 | 2.2642 |
| 4/15/2019 14:03 | 0.5    | 2.3    | 16.4508 | -0.3667 | 23.9111 | 41.3636 | 1.766  | 2.2923 |

|                 |        |         |         |         |         |         |        |        |
|-----------------|--------|---------|---------|---------|---------|---------|--------|--------|
| 4/15/2019 14:04 | 0.5    | 2.0167  | 15.7692 | 0.1     | 23.1886 | 40.85   | 1.7167 | 2.2933 |
| 4/15/2019 14:05 | 0.5    | 2.4333  | 15.95   | 0       | 23.6231 | 40.275  | 1.7378 | 2.3046 |
| 4/15/2019 14:06 | 0.4917 | 2.5     | 16.4958 | -0.1    | 23.9471 | 39.9455 | 1.791  | 2.3027 |
| 4/15/2019 14:07 | 0.4    | 2.8833  | 17.0767 | -0.0333 | 24.1158 | 39.65   | 1.8082 | 2.2885 |
| 4/15/2019 14:08 | 0.4    | 2.7167  | 16.9608 | -0.1167 | 24.2829 | 39.3417 | 1.8073 | 2.3038 |
| 4/15/2019 14:09 | 0.4    | 2.3333  | 17.1233 | 0.0833  | 24.4404 | 38.9833 | 1.8377 | 2.3064 |
| 4/15/2019 14:10 | 0.4    | 2.35    | 16.3992 | -0.25   | 23.7329 | 38.7417 | 1.7722 | 2.3367 |
| 4/15/2019 14:11 | 0.4    | 3       | 16.1833 | 0.4     | 23.2569 | 38.3182 | 1.7578 | 2.3368 |
| 4/15/2019 14:12 | 0.4    | 2.6667  | 15.8717 | -0.1    | 22.8648 | 38.1182 | 1.7382 | 2.3418 |
| 4/15/2019 14:13 | 0.4    | 2.7333  | 14.9475 | 0.2333  | 22.1096 | 37.78   | 1.6618 | 2.3245 |
| 4/15/2019 14:14 | 0.4    | 2.5333  | 14.6108 | 0.2     | 21.8261 | 37.2833 | 1.6657 | 2.3048 |
| 4/15/2019 14:15 | 0.4    | 3.0333  | 14.3383 | -0.2    | 21.3835 | 36.8546 | 1.6347 | 2.2989 |
| 4/15/2019 14:16 | 0.4    | 2.3667  | 14.1517 | -0.2    | 21.1506 | 36.46   | 1.5922 | 2.3278 |
| 4/15/2019 14:17 | 0.425  | 2.3     | 14.0883 | -0.3833 | 21.1129 | 36.09   | 1.605  | 2.32   |
| 4/15/2019 14:18 | 0.4083 | 2.2167  | 13.4583 | -0.65   | 20.8157 | 35.6083 | 1.5817 | 2.3288 |
| 4/15/2019 14:19 | 0.3333 | 2.2     | 13.9875 | -0.3333 | 21.2987 | 35.2    | 1.6407 | 2.3694 |
| 4/15/2019 14:20 | 0.2333 | 2.6167  | 14.1858 | 0       | 21.1481 | 34.8    | 1.6253 | 2.348  |
| 4/15/2019 14:21 | 0.2    | 2.5333  | 13.3917 | -0.2    | 20.3533 | 34.2364 | 1.56   | 2.3328 |
| 4/15/2019 14:22 | 0.1833 | 3.6833  | 14.0392 | 0.8     | 20.3604 | 33.6182 | 1.5708 | 2.3457 |
| 4/15/2019 14:23 | 0.1    | 3.2333  | 14.2408 | 0.2     | 21.0297 | 33.3182 | 1.6257 | 2.3857 |
| 4/15/2019 14:24 | 0.2    | 3.5833  | 12.7775 | -0.25   | 19.5536 | 32.8455 | 1.5157 | 2.3506 |
| 4/15/2019 14:25 | 0.2917 | 3.1833  | 12.2108 | 0.7333  | 18.9761 | 32.2818 | 1.4087 | 2.2986 |
| 4/15/2019 14:26 | 0.6083 | 4.4167  | 12.305  | 1.15    | 18.3478 | 31.55   | 1.2848 | 2.2731 |
| 4/15/2019 14:27 | 1.375  | 5.8667  | 11.1283 | 3.3333  | 15.3376 | 30.3    | 0.9522 | 2.1613 |
| 4/15/2019 14:28 | 2.1    | 5.7     | 10.0315 | 2.85    | 15.3064 | 28.7417 | 0.8947 | 2.1331 |
| 4/15/2019 14:29 | 2.7667 | 7.3667  | 10.0352 | 3.3667  | 14.8515 | 27.1273 | 0.8237 | 2.1143 |
| 4/15/2019 14:30 | 3.175  | 7.2     | 9.997   | 4.1667  | 14.1976 | 25.3583 | 0.7148 | 2.0942 |
| 4/15/2019 14:31 | 3.85   | 8.55    | 10.2178 | 5.5833  | 13.7479 | 23.4333 | 0.6481 | 2.0563 |
| 4/15/2019 14:32 | 4.4333 | 7.6667  | 9.8453  | 5       | 13.6745 | 21.1167 | 0.6409 | 2.0341 |
| 4/15/2019 14:33 | 4.875  | 8.3167  | 10.2642 | 4.9833  | 13.3636 | 18.98   | 0.5916 | 2.053  |
| 4/15/2019 14:34 | 5.4    | 9.9333  | 11.1    | 7.2833  | 12.7168 | 16.8909 | 0.5407 | 2.0843 |
| 4/15/2019 14:35 | 6.0917 | 10.25   | 11.225  | 6.95    | 11.9658 | 14.5583 | 0.4768 | 2.0676 |
| 4/15/2019 14:36 | 6.6583 | 9.9333  | 11.195  | 7.75    | 11.9958 | 12.2091 | 0.4685 | 2.0684 |
| 4/15/2019 14:37 | 6.9917 | 10.6    | 11.395  | 7.8167  | 11.972  | 10.12   | 0.4544 | 2.0486 |
| 4/15/2019 14:38 | 7.3417 | 11.4667 | 12.1917 | 8.9667  | 11.5252 | 8.2     | 0.4032 | 2.0901 |
| 4/15/2019 14:39 | 7.825  | 11.2    | 12.1433 | 8.8833  | 10.6328 | 6.7545  | 0.3897 | 2.0589 |
| 4/15/2019 14:40 | 8.3917 | 12.25   | 12.4067 | 10.2667 | 9.9534  | 5.83    | 0.3619 | 2.0309 |
| 4/15/2019 14:41 |        |         |         |         | 9.1789  | 5.0111  | 0.3346 | 2.0044 |
| 4/15/2019 14:42 |        |         |         |         |         |         | 0.3338 | 1.988  |
| 4/15/2019 14:43 |        |         |         |         |         |         | 0.2916 | 1.9777 |
| 4/15/2019 14:44 |        |         |         |         |         |         | 0.2768 | 2.0052 |
| 4/15/2019 14:45 |        |         |         |         |         |         | 0.275  | 1.9449 |
| 4/15/2019 14:46 |        |         |         |         |         |         | 0.2281 | 1.9285 |
| 4/15/2019 14:47 |        |         |         |         |         |         | 0.2219 | 1.941  |
| 4/15/2019 14:48 |        |         |         |         |         |         | 0.2061 | 1.9414 |
| 4/15/2019 14:49 |        |         |         |         |         |         | 0.2243 | 1.9108 |
| 4/15/2019 14:50 |        |         |         |         |         |         | 0.1889 | 1.8963 |

|                 |        |        |
|-----------------|--------|--------|
| 4/15/2019 14:51 | 0.1696 | 1.8887 |
| 4/15/2019 14:52 | 0.1797 | 1.8715 |
| 4/15/2019 14:53 | 0.1573 | 1.8496 |
| 4/15/2019 14:54 | 0.1617 | 1.8396 |
| 4/15/2019 14:55 | 0.1685 | 1.8369 |
| 4/15/2019 14:56 | 0.1522 | 1.8294 |
| 4/15/2019 14:57 | 0.1552 | 1.8109 |
| 4/15/2019 14:58 | 0.1175 | 1.8163 |
| 4/15/2019 14:59 | 0.1356 | 1.8186 |
| 4/15/2019 15:00 | 0.1175 | 1.7578 |
| 4/15/2019 15:01 | 0.1055 | 1.7839 |
| 4/15/2019 15:02 | 0.1165 | 1.7449 |
| 4/15/2019 15:03 | 0.0953 | 1.7179 |
| 4/15/2019 15:04 | 0.1018 | 1.7172 |
| 4/15/2019 15:05 | 0.1013 | 1.7217 |
| 4/15/2019 15:06 | 0.0946 | 1.7168 |
| 4/15/2019 15:07 | 0.1367 | 1.7016 |
| 4/15/2019 15:08 | 0.1222 | 1.705  |
| 4/15/2019 15:09 | 0.113  | 1.6933 |
| 4/15/2019 15:10 | 0.1197 | 1.7029 |
| 4/15/2019 15:11 | 0.0966 | 1.6911 |
| 4/15/2019 15:12 | 0.1082 | 1.6575 |
| 4/15/2019 15:13 | 0.094  | 1.624  |
| 4/15/2019 15:14 | 0.0798 | 1.6315 |
| 4/15/2019 15:15 | 0.0973 | 1.6573 |
| 4/15/2019 15:16 | 0.0839 | 1.6683 |
| 4/15/2019 15:17 | 0.095  | 1.6534 |
| 4/15/2019 15:18 | 0.0942 | 1.6482 |
| 4/15/2019 15:19 | 0.0792 | 1.6468 |
| 4/15/2019 15:20 | 0.0822 | 1.6653 |
| 4/15/2019 15:21 | 0.0694 | 1.6578 |
| 4/15/2019 15:22 | 0.0857 | 1.6486 |
| 4/15/2019 15:23 | 0.0944 | 1.6163 |
| 4/15/2019 15:24 | 0.0863 | 1.6365 |
| 4/15/2019 15:25 | 0.0859 | 1.6431 |
| 4/15/2019 15:26 | 0.0815 | 1.6451 |
| 4/15/2019 15:27 | 0.076  | 1.6211 |
| 4/15/2019 15:28 | 0.0744 | 1.6013 |
| 4/15/2019 15:29 | 0.0592 | 1.6152 |
| 4/15/2019 15:30 | 0.0709 | 1.6443 |
| 4/15/2019 15:31 | 0.0633 | 1.6438 |
| 4/15/2019 15:32 | 0.0702 | 1.6562 |
| 4/15/2019 15:33 | 0.0697 | 1.6873 |
| 4/15/2019 15:34 | 0.0581 | 1.6576 |
| 4/15/2019 15:35 | 0.0713 | 1.6389 |
| 4/15/2019 15:36 | 0.0668 | 1.6273 |
| 4/15/2019 15:37 | 0.0607 | 1.6524 |

|                 |        |        |        |        |        |        |        |        |        |
|-----------------|--------|--------|--------|--------|--------|--------|--------|--------|--------|
| 4/15/2019 15:38 |        |        |        |        |        |        |        | 0.0756 | 1.6758 |
| 4/15/2019 15:39 |        |        |        |        |        |        |        | 0.06   | 1.6713 |
| 4/15/2019 15:40 |        |        |        |        |        |        |        | 0.0649 | 1.6805 |
| 4/15/2019 15:41 |        |        |        |        |        |        |        | 0.0736 | 1.6674 |
| 4/15/2019 15:42 |        |        |        |        |        |        |        | 0.0608 | 1.7049 |
| 4/15/2019 15:43 |        |        |        |        |        |        |        | 0.073  | 1.7108 |
| 4/15/2019 15:44 |        |        |        |        |        |        |        | 0.0662 | 1.7137 |
| 4/15/2019 15:45 |        |        |        |        |        |        |        | 0.0677 | 1.7186 |
| 4/15/2019 15:46 |        |        |        |        |        |        |        | 0.0741 | 1.7259 |
| 4/15/2019 15:47 |        |        |        |        |        |        |        | 0.0657 | 1.7208 |
| 4/15/2019 15:48 |        |        |        |        |        |        |        | 0.0806 | 1.6676 |
| 4/15/2019 15:49 |        |        |        |        |        |        |        | 0.0612 | 1.6787 |
| 4/15/2019 15:50 |        |        |        |        |        |        |        | 0.0688 | 1.6943 |
| 4/15/2019 15:51 |        |        |        |        |        |        |        | 0.0684 | 1.7154 |
| 4/15/2019 15:52 |        |        |        |        |        |        |        | 0.0615 | 1.7199 |
| 4/15/2019 15:53 |        |        |        |        |        |        |        | 0.0749 | 1.71   |
| 4/15/2019 15:54 |        |        |        |        |        |        |        | 0.0651 | 1.7443 |
| 4/15/2019 15:55 |        |        |        |        |        |        |        | 0.0725 | 1.7299 |
| 4/15/2019 15:56 |        |        |        |        |        |        |        | 0.0758 | 1.7104 |
| 4/15/2019 15:57 |        |        |        |        |        |        |        | 0.0619 | 1.7318 |
| 4/15/2019 15:58 |        |        |        |        |        |        |        | 0.0737 | 1.7129 |
| 4/15/2019 15:59 |        |        |        |        |        |        |        | 0.0651 | 1.7405 |
| 4/15/2019 16:00 |        |        |        |        |        |        |        | 0.0766 | 1.7463 |
| 4/15/2019 16:01 |        |        |        |        |        |        |        | 0.0784 | 1.7309 |
| 4/15/2019 16:02 |        |        |        |        |        |        |        | 0.0548 | 1.7333 |
| 4/15/2019 16:03 |        |        |        |        |        |        |        | 0.0776 | 1.7064 |
| 4/15/2019 16:04 |        |        |        |        |        |        |        | 0.0651 | 1.7511 |
| 4/15/2019 16:05 |        |        |        |        |        |        |        | 0.07   | 1.753  |
| 4/15/2019 16:06 |        |        |        |        |        |        |        | 0.0751 | 1.7128 |
| 4/15/2019 16:07 |        |        |        |        |        |        |        | 0.0662 | 1.7334 |
| 4/15/2019 16:08 |        |        |        |        |        |        |        | 0.0783 | 1.744  |
| 4/15/2019 16:09 |        |        |        |        |        |        |        | 0.0687 | 1.7616 |
| 4/15/2019 16:10 |        |        |        |        |        |        |        | 0.0705 | 1.7861 |
| 4/15/2019 16:11 |        |        |        |        |        |        |        | 0.0756 | 1.7652 |
| 4/15/2019 16:12 | 5.8    | 5.4    | 5.5065 | 4.6333 | 3.2697 | 1.5333 | 0.07   | 1.7852 |        |
| 4/15/2019 16:13 | 5.8    | 5.4333 | 6.1535 | 4.7    | 3.2833 | 1.4364 | 0.077  | 1.807  |        |
| 4/15/2019 16:14 | 5.7583 | 5.3833 | 6.8013 | 5      | 3.303  | 1.5182 | 0.0639 | 1.7866 |        |
| 4/15/2019 16:15 | 5.7    | 5.3333 | 6.8278 | 4.9667 | 3.3208 | 1.69   | 0.0765 | 1.7848 |        |
| 4/15/2019 16:16 | 5.6417 | 4.8667 | 7.4093 | 4.9167 | 3.3179 | 1.6417 | 0.0787 | 1.7886 |        |
| 4/15/2019 16:17 | 5.5727 | 4.45   | 7.3403 | 4.3    | 3.3408 | 1.7818 | 0.0614 | 1.7696 |        |
| 4/15/2019 16:18 | 5.45   | 5.3667 | 7.5869 | 4.9667 | 3.3286 | 1.7167 | 0.0781 | 1.7718 |        |
| 4/15/2019 16:19 | 5.3333 | 4.65   | 7.6809 | 4.4333 | 3.3258 | 1.8    | 0.0664 | 1.7808 |        |
| 4/15/2019 16:20 | 5.3    | 4.5167 | 7.1639 | 5.25   | 3.3364 | 2.1    | 0.0686 | 1.7658 |        |
| 4/15/2019 16:21 | 5.3    | 4.7167 | 7.0398 | 4.6667 | 3.3178 | 2.1    | 0.0777 | 1.7511 |        |
| 4/15/2019 16:22 | 5.2167 | 5.4333 | 6.5433 | 4.35   | 3.3428 | 2.1    | 0.0622 | 1.7858 |        |
| 4/15/2019 16:23 | 5.15   | 4.7833 | 6.8215 | 4.6833 | 3.3623 | 2      | 0.0741 | 1.766  |        |
| 4/15/2019 16:24 | 5.025  | 4.4167 | 6.758  | 4.5    | 3.3589 | 2      | 0.065  | 1.7857 |        |

|                 |        |        |        |        |        |        |        |        |
|-----------------|--------|--------|--------|--------|--------|--------|--------|--------|
| 4/15/2019 16:25 | 4.8833 | 3.8833 | 7.0699 | 4.6833 | 3.3678 | 2      | 0.0691 | 1.7876 |
| 4/15/2019 16:26 | 4.7417 | 4.05   | 7.0151 | 4.3333 | 3.3626 | 1.9833 | 0.0748 | 1.7779 |
| 4/15/2019 16:27 | 4.625  | 4.1333 | 7.0106 | 3.8333 | 3.3639 | 1.9    | 0.0684 | 1.7738 |
| 4/15/2019 16:28 | 4.6    | 4.05   | 7.1472 | 4      | 3.3727 | 1.9    | 0.0792 | 1.7738 |
| 4/15/2019 16:29 | 4.5333 | 4.2833 | 6.8643 | 4.35   | 3.395  | 1.8636 | 0.0652 | 1.7614 |
| 4/15/2019 16:30 | 4.4833 | 4.0333 | 7.1051 | 4.05   | 3.3844 | 1.8    | 0.0696 | 1.7988 |
| 4/15/2019 16:31 | 4.4    | 3.7    | 6.6567 | 4.4167 | 3.3727 | 1.8    | 0.0758 | 1.8269 |
| 4/15/2019 16:32 | 4.325  | 3.1333 | 6.5868 | 4.1    | 3.3779 | 1.8    | 0.0638 | 1.7943 |
| 4/15/2019 16:33 | 4.225  | 3.8333 | 6.6686 | 3.65   | 3.3806 | 1.8    | 0.0711 | 1.8024 |
| 4/15/2019 16:34 | 4.2    | 4      | 6.7912 | 3.9667 | 3.3936 | 1.8    | 0.0588 | 1.8116 |
| 4/15/2019 16:35 | 4.125  | 4.0167 | 6.3593 | 4.1167 | 3.3847 | 1.8    | 0.0752 | 1.8217 |
| 4/15/2019 16:36 | 4.1    | 3.8167 | 6.3369 | 3.9    | 3.3768 | 1.86   | 0.0698 | 1.8106 |
| 4/15/2019 16:37 | 4.0167 | 3.55   | 6.3998 | 4.1333 | 3.3693 | 1.9    | 0.0624 | 1.8122 |
| 4/15/2019 16:38 | 4      | 3.85   | 6.4064 | 3.9833 | 3.3843 | 1.9    | 0.0755 | 1.822  |
| 4/15/2019 16:39 | 4      | 3.4833 | 6.519  | 3.6333 | 3.386  | 1.9    | 0.0657 | 1.8324 |
| 4/15/2019 16:40 | 4      | 3.6333 | 6.5358 | 3.1    | 3.3878 | 1.9    | 0.0729 | 1.8187 |
| 4/15/2019 16:41 | 3.9667 | 3.6333 | 6.2526 | 3.2167 | 3.4213 | 1.9    | 0.0605 | 1.8039 |
| 4/15/2019 16:42 | 3.9    | 3.1833 | 5.8823 | 3.6    | 3.4116 | 1.925  | 0.0678 | 1.7938 |
| 4/15/2019 16:43 | 3.8333 | 3.3    | 6.0292 | 3.5333 | 3.4128 | 1.9    | 0.0666 | 1.8003 |
| 4/15/2019 16:44 | 3.8    | 3.25   | 6.0818 | 3.05   | 3.4131 | 1.925  | 0.0613 | 1.8314 |
| 4/15/2019 16:45 | 3.8    | 3.2    | 6.105  | 3.0667 | 3.4068 | 1.9    | 0.0658 | 1.8138 |
| 4/15/2019 16:46 | 3.7    | 3.5667 | 5.8628 | 3.1833 | 3.3878 | 1.9    | 0.0629 | 1.8048 |
| 4/15/2019 16:47 | 3.7    | 3.2    | 5.7671 | 3.4    | 3.3979 | 1.9    | 0.0595 | 1.8077 |
| 4/15/2019 16:48 | 3.625  | 3.5167 | 5.9128 | 3.2833 | 3.3863 | 1.9    | 0.0729 | 1.8008 |
| 4/15/2019 16:49 | 3.55   | 3.3167 | 5.9443 | 3.3167 | 3.3811 | 1.8667 | 0.0558 | 1.8191 |
| 4/15/2019 16:50 | 3.45   | 2.85   | 5.9333 | 3.3667 | 3.3797 | 1.9    | 0.0763 | 1.8036 |
| 4/15/2019 16:51 | 3.3667 | 3.0167 | 5.8127 | 3.0667 | 3.3669 | 1.9    | 0.0668 | 1.7899 |
| 4/15/2019 16:52 | 3.3    | 2.8167 | 5.5291 | 3.2    | 3.3573 | 1.92   | 0.0563 | 1.782  |
| 4/15/2019 16:53 | 3.2    | 3.45   | 5.5158 | 2.6667 | 3.3628 | 1.9417 | 0.0672 | 1.8043 |
| 4/15/2019 16:54 | 3.2    | 2.1167 | 5.5174 | 3.1    | 3.3585 | 1.9727 | 0.0605 | 1.8256 |
| 4/15/2019 16:55 | 3.2    | 2.8833 | 5.4346 | 3.1333 | 3.3319 | 2      | 0.0638 | 1.8026 |
| 4/15/2019 16:56 | 3.2    | 2.9    | 5.539  | 2.6167 | 3.3495 | 2      | 0.0612 | 1.7855 |
| 4/15/2019 16:57 | 3.15   | 2.8333 | 5.2222 | 2.65   | 3.3413 | 2      | 0.0564 | 1.8002 |
| 4/15/2019 16:58 | 3.1667 | 2.8667 | 5.5329 | 2.95   | 3.313  | 2.0091 | 0.0682 | 1.7887 |
| 4/15/2019 16:59 | 3.1    | 2.4667 | 5.3013 | 2.5833 | 3.3238 | 2.0833 | 0.0561 | 1.799  |
| 4/15/2019 17:00 | 3.1    | 2.85   | 5.246  | 2.8667 | 3.3251 | 2      | 0.0656 | 1.8246 |
| 4/15/2019 17:01 | 3.0333 | 2.4    | 5.5625 | 2.35   | 3.32   | 2      | 0.0568 | 1.8469 |
| 4/15/2019 17:02 | 3      | 2.4167 | 5.3264 | 2.3333 | 3.3186 | 1.9727 | 0.0559 | 1.8249 |
| 4/15/2019 17:03 | 2.9667 | 2.6    | 5.0629 | 2.5667 | 3.314  | 1.9    | 0.0682 | 1.8118 |
| 4/15/2019 17:04 | 2.9    | 2.8    | 5.1107 | 2.1167 | 3.3062 | 1.9    | 0.0508 | 1.7738 |
| 4/15/2019 17:05 | 2.9    | 1.9167 | 5.4289 | 2.45   | 3.2938 | 1.9    | 0.0707 | 1.8249 |
| 4/15/2019 17:06 | 2.9    | 2.2833 | 5.138  | 2.15   | 3.2898 | 1.9    | 0.0587 | 1.8177 |
| 4/15/2019 17:07 | 2.9    | 2.2167 | 5.1247 | 2.35   | 3.2773 | 1.875  | 0.054  | 1.8033 |
| 4/15/2019 17:08 | 2.8    | 2.1    | 5.3834 | 1.95   | 3.2834 | 1.9    | 0.064  | 1.8012 |
| 4/15/2019 17:09 | 2.8083 | 2.4667 | 5.2406 | 2.65   | 3.2601 | 1.9    | 0.0513 | 1.7858 |
| 4/15/2019 17:10 | 2.8    | 2.7    | 5.2331 | 2.7833 | 3.2569 | 1.9    | 0.0622 | 1.7946 |
| 4/15/2019 17:11 | 2.8    | 3.0333 | 5.1618 | 2.3333 | 3.2578 | 1.9    | 0.0598 | 1.7905 |



|                 |        |        |        |        |        |        |        |        |
|-----------------|--------|--------|--------|--------|--------|--------|--------|--------|
| 4/15/2019 17:12 | 2.7333 | 1.7333 | 5.1132 | 2      | 3.2462 | 1.9333 | 0.0557 | 1.7958 |
| 4/15/2019 17:13 | 2.6417 | 2.1667 | 4.9497 | 2.55   | 3.2405 | 2      | 0.0668 | 1.8252 |
| 4/15/2019 17:14 | 2.5417 | 2.6    | 5.2926 | 2.05   | 3.2396 | 2      | 0.046  | 1.8234 |
| 4/15/2019 17:15 | 2.4333 | 1.8667 | 5.435  | 1.7333 | 3.223  | 2.0091 | 0.0617 | 1.7805 |
| 4/15/2019 17:16 | 2.3333 | 2.2333 | 5.0705 | 2.45   | 3.2235 | 2.1    | 0.0564 | 1.7864 |
| 4/15/2019 17:17 | 2.25   | 2.1833 | 5.0759 | 2.75   | 3.2147 | 2.1    | 0.0543 | 1.7988 |
| 4/15/2019 17:18 | 2.2    | 2.3667 | 4.8093 | 2.5833 | 3.2158 | 2.1    | 0.0633 | 1.8069 |
| 4/15/2019 17:19 | 2.2    | 1.8833 | 4.7108 | 2.1333 | 3.2015 | 2.1    | 0.0474 | 1.8007 |
| 4/15/2019 17:20 | 2.225  | 1.4333 | 5.1422 | 2      | 3.2021 | 2.1    | 0.0615 | 1.7904 |
| 4/15/2019 17:21 | 2.2    | 2.4    | 5.0803 | 2.3333 | 3.1862 | 2.1    | 0.0557 | 1.8104 |
| 4/15/2019 17:22 | 2.125  | 2.1667 | 4.8012 | 2.2333 | 3.1691 | 2.1    | 0.0571 | 1.7811 |
| 4/15/2019 17:23 | 2.1    | 2.3167 | 4.9781 | 1.8333 | 3.1686 | 2.1    | 0.0635 | 1.8158 |
| 4/15/2019 17:24 | 2.15   | 1.5    | 4.8256 | 1.8667 | 3.1471 | 2.1    | 0.0499 | 1.8422 |
| 4/15/2019 17:25 | 2.2    | 2.1167 | 4.9266 | 2.1333 | 3.1521 | 2.1    | 0.0551 | 1.8647 |
| 4/15/2019 17:26 | 2.2    | 1.1167 | 5.0728 | 1.8    | 3.1317 | 2.1    | 0.0544 | 1.9433 |
| 4/15/2019 17:27 | 2.2    | 1.7333 | 4.8637 | 1.8667 | 3.1283 | 2.1    | 0.0515 | 2.0994 |
| 4/15/2019 17:28 | 2.2    | 1.9167 | 5.0188 | 2.1667 | 3.1175 | 2.1    | 0.0637 | 2.2187 |
| 4/15/2019 17:29 | 2.2    | 2.0333 | 4.8043 | 2.0167 | 3.1175 | 2.1273 | 0.0489 | 2.1525 |
| 4/15/2019 17:30 | 2.1583 | 1.65   | 4.8527 | 2.5667 | 3.0976 | 2.1417 | 0.0578 | 2.1254 |
| 4/15/2019 17:31 | 2.175  | 2.0333 | 4.4528 | 1.4667 | 3.0953 | 2.2    | 0.0596 | 2.1337 |
| 4/15/2019 17:32 | 2.2    | 2.3667 | 4.6895 | 1.35   | 3.0986 | 2.2    | 0.0516 | 2.1576 |
| 4/15/2019 17:33 | 2.2917 | 1.4667 | 4.5447 | 1.5333 | 3.0908 | 2.2    | 0.0602 | 2.1398 |
| 4/15/2019 17:34 | 2.2667 | 1.4833 | 4.5517 | 1.7833 | 3.0773 | 2.2    | 0.0445 | 2.1159 |
| 4/15/2019 17:35 | 2.2    | 2.1167 | 4.7035 | 1.45   | 3.0753 | 2.2    | 0.0593 | 2.1089 |
| 4/15/2019 17:36 | 2.1167 | 1.7833 | 4.445  | 2.0667 | 3.0773 | 2.2    | 0.0629 | 2.1371 |
| 4/15/2019 17:37 | 2.1    | 1.8    | 4.693  | 1.5833 | 3.0743 | 2.2    | 0.0467 | 2.1255 |
| 4/15/2019 17:38 | 2.1    | 2.2167 | 4.8493 | 1.55   | 3.0646 | 2.2    | 0.0645 | 2.1484 |
| 4/15/2019 17:39 | 2.1    | 1.9667 | 4.7605 | 1.5833 | 3.0598 | 2.2    | 0.0524 | 2.14   |
| 4/15/2019 17:40 | 2.1    | 1.5667 | 4.6643 | 2.15   | 3.054  | 2.2    | 0.0582 | 2.1062 |
| 4/15/2019 17:41 | 2.1    | 1.75   | 4.6163 | 2.2167 | 3.0536 | 2.2    | 0.0579 | 2.1088 |
| 4/15/2019 17:42 | 2.0417 | 1.85   | 4.4388 | 1.5167 | 3.0503 | 2.2    | 0.054  | 2.1351 |
| 4/15/2019 17:43 | 2      | 1.7833 | 4.9888 | 1.8333 | 3.0439 | 2.1091 | 0.0714 | 2.0843 |
| 4/15/2019 17:44 | 2      | 1.9167 | 4.6095 | 1.8667 | 3.0527 | 2.1    | 0.0521 | 2.0635 |
| 4/15/2019 17:45 | 2      | 1.7    | 4.8103 | 2.0333 | 3.0328 | 2.1    | 0.0648 | 2.0966 |
| 4/15/2019 17:46 | 2.0333 | 1.4667 | 4.7138 | 2.2    | 3.0273 | 2.1    | 0.0619 | 2.104  |
| 4/15/2019 17:47 | 2.1    | 1.9167 | 4.7957 | 2.1167 | 3.0184 | 2.1    | 0.0496 | 2.1154 |
| 4/15/2019 17:48 | 2.1583 | 1.8833 | 4.5083 | 1.6333 | 3.0024 | 2.1    | 0.062  | 2.1294 |
| 4/15/2019 17:49 | 2.125  | 1.5333 | 4.6323 | 1.6333 | 3.029  | 2.1    | 0.0515 | 2.1249 |
| 4/15/2019 17:50 | 2.175  | 1.1833 | 4.6608 | 1.5167 | 3.0104 | 2.1    | 0.0613 | 2.1112 |
| 4/15/2019 17:51 | 2.1    | 1.3167 | 4.4365 | 1.5833 | 3.0117 | 2.15   | 0.0606 | 2.0814 |
| 4/15/2019 17:52 | 2.1083 | 1.4667 | 4.4052 | 1.7667 | 2.9923 | 2.1545 | 0.0528 | 2.0766 |
| 4/15/2019 17:53 | 2.1    | 2.0667 | 4.6628 | 1.45   | 2.9977 | 2.2    | 0.0705 | 2.13   |
| 4/15/2019 17:54 | 2.1    | 1.9333 | 4.611  | 1.2    | 2.9763 | 2.2    | 0.0505 | 2.1229 |
| 4/15/2019 17:55 | 2.1    | 2.0167 | 5.0258 | 1.4167 | 2.9807 | 2.2    | 0.0605 | 2.092  |
| 4/15/2019 17:56 | 2.0417 | 0.9833 | 4.6655 | 1.15   | 2.9789 | 2.2    | 0.0631 | 2.0758 |
| 4/15/2019 17:57 | 2.0917 | 1.5333 | 4.7268 | 1.9667 | 2.9643 | 2.2545 | 0.046  | 2.0804 |
| 4/15/2019 17:58 | 2.1    | 2.2    | 4.5967 | 1.5833 | 2.9708 | 2.2636 | 0.0573 | 2.0682 |

|                 |        |        |        |        |        |        |        |        |
|-----------------|--------|--------|--------|--------|--------|--------|--------|--------|
| 4/15/2019 17:59 | 2.2    | 1.9833 | 4.6328 | 1.3833 | 2.9398 | 2.3    | 0.0484 | 2.0521 |
| 4/15/2019 18:00 | 2.2667 | 2.2167 | 4.7272 | 0.8833 | 2.9353 | 2.2636 | 0.064  | 2.0653 |
| 4/15/2019 18:01 | 2.2    | 1.5833 | 4.452  | 1.2167 | 2.9466 | 2.2    | 0.0583 | 2.0636 |
| 4/15/2019 18:02 | 2.2    | 1.75   | 4.7643 | 1.35   | 2.934  | 2.2    | 0.0561 | 2.0784 |
| 4/15/2019 18:03 | 2.2    | 1.9    | 4.6622 | 1.5167 | 2.9345 | 2.2    | 0.0654 | 2.0843 |
| 4/15/2019 18:04 | 2.2    | 1.8667 | 4.5222 | 2.1333 | 2.9058 | 2.2    | 0.0544 | 2.0794 |
| 4/15/2019 18:05 | 2.2    | 1.5833 | 4.4232 | 1.8167 | 2.9266 | 2.2    | 0.0643 | 2.0939 |
| 4/15/2019 18:06 | 2.175  | 0.9167 | 4.3553 | 1.7333 | 2.8983 | 2.2    | 0.05   | 2.0723 |
| 4/15/2019 18:07 | 2.1    | 1.9167 | 4.4283 | 1.2667 | 2.8857 | 2.1083 | 0.0614 | 2.0853 |
| 4/15/2019 18:08 | 2.1    | 1.65   | 4.4982 | 1.7167 | 2.8825 | 2.1    | 0.063  | 2.073  |
| 4/15/2019 18:09 | 2.0917 | 1.9167 | 4.2442 | 1.6    | 2.8893 | 2.1    | 0.0555 | 2.0374 |
| 4/15/2019 18:10 | 2.0917 | 1.9    | 4.1407 | 2.15   | 2.8786 | 2.1    | 0.0688 | 2.0116 |
| 4/15/2019 18:11 | 2.0167 | 1.65   | 4.5105 | 1.15   | 2.8696 | 2.1    | 0.0559 | 2.0461 |
| 4/15/2019 18:12 | 2.1    | 1.2    | 4.4335 | 1.4667 | 2.8583 | 2.1    | 0.0665 | 2.0451 |
| 4/15/2019 18:13 | 2.1    | 2.0667 | 4.363  | 1.7167 | 2.8508 | 2.1    | 0.061  | 2.0736 |
| 4/15/2019 18:14 | 2.1833 | 2.2333 | 4.4467 | 2.0167 | 2.8568 | 2.1    | 0.0573 | 2.0861 |
| 4/15/2019 18:15 | 2.1667 | 2      | 4.6505 | 1.65   | 2.8439 | 2.1    | 0.0736 | 2.0397 |
| 4/15/2019 18:16 | 2.1    | 1.4333 | 4.5897 | 1.5833 | 2.833  | 2.1    | 0.0544 | 2.0058 |
| 4/15/2019 18:17 | 2.05   | 1.7333 | 4.2832 | 1.3833 | 2.8372 | 2.1    | 0.071  | 2.034  |
| 4/15/2019 18:18 | 2      | 1.85   | 4.5132 | 1.8667 | 2.8258 | 2.1    | 0.0503 | 2.0411 |
| 4/15/2019 18:19 | 1.975  | 1.5    | 4.3362 | 1.2167 | 2.8167 | 2.1    | 0.0586 | 2.0191 |
| 4/15/2019 18:20 | 1.9    | 1.8833 | 4.2465 | 1.4667 | 2.8037 | 2.1    | 0.0729 | 2.0005 |
| 4/15/2019 18:21 | 1.975  | 1.1833 | 4.1935 | 1.6833 | 2.8015 | 2.1    | 0.0487 | 2.0263 |
| 4/15/2019 18:22 | 2      | 1.8333 | 4.4462 | 1.5833 | 2.7946 | 2.1    | 0.069  | 2.0327 |
| 4/15/2019 18:23 | 2.0083 | 1.0333 | 4.4348 | 1.3667 | 2.8131 | 2.1    | 0.0546 | 2.0268 |
| 4/15/2019 18:24 | 2      | 2.15   | 4.1142 | 1.2833 | 2.7987 | 2.175  | 0.0591 | 2.0098 |
| 4/15/2019 18:25 | 1.9833 | 1.7167 | 4.4142 | 1.1833 | 2.7947 | 2.2    | 0.0634 | 2.0044 |
| 4/15/2019 18:26 | 1.9167 | 1.6667 | 4.533  | 1.2833 | 2.7776 | 2.1545 | 0.0562 | 2.0016 |
| 4/15/2019 18:27 | 1.9    | 1.05   | 4.104  | 1.5    | 2.7594 | 2.1    | 0.0655 | 2.0355 |
| 4/15/2019 18:28 | 1.9    | 1.3167 | 4.1792 | 1.2833 | 2.7685 | 2.1    | 0.0563 | 2.0365 |
| 4/15/2019 18:29 | 1.8    | 1.95   | 4.3055 | 1.7167 | 2.7605 | 2.1    | 0.0671 | 2.0285 |
| 4/15/2019 18:30 | 1.8    | 1.8333 | 4.1245 | 1.2    | 2.7507 | 2.19   | 0.0611 | 2.0068 |
| 4/15/2019 18:31 | 1.8    | 1.3667 | 4.0908 | 0.8333 | 2.7519 | 2.2    | 0.0535 | 1.9878 |
| 4/15/2019 18:32 | 1.8    | 2.2333 | 4.4433 | 1.95   | 2.7432 | 2.2    | 0.0689 | 1.9927 |
| 4/15/2019 18:33 | 1.7833 | 1.1667 | 4.4152 | 1.5333 | 2.7622 | 2.2    | 0.057  | 2.0243 |
| 4/15/2019 18:34 | 1.8    | 1.3833 | 4.3288 | 1.8    | 2.7553 | 2.2    | 0.055  | 2.0225 |
| 4/15/2019 18:35 | 1.8    | 0.9167 | 4.1397 | 1.0167 | 2.7521 | 2.12   | 0.0637 | 2.0185 |
| 4/15/2019 18:36 | 1.8    | 1.45   | 4.4808 | 1.7167 | 2.7338 | 2.1    | 0.0574 | 2.0275 |
| 4/15/2019 18:37 | 1.775  | 1.7    | 4.1582 | 1.3333 | 2.7468 | 2.1    | 0.0612 | 2.0308 |
| 4/15/2019 18:38 | 1.7417 | 1.7167 | 4.228  | 1      | 2.7413 | 2.1    | 0.0528 | 2.0608 |
| 4/15/2019 18:39 | 1.7167 | 0.9167 | 4.4    | 0.9833 | 2.7133 | 2.1    | 0.0632 | 2.0163 |
| 4/15/2019 18:40 | 1.7833 | 1.75   | 4.3532 | 1.15   | 2.7265 | 2.1    | 0.051  | 2.0089 |
| 4/15/2019 18:41 | 1.775  | 1.6167 | 4.495  | 1.3333 | 2.727  | 2.1    | 0.0594 | 2.0124 |
| 4/15/2019 18:42 | 1.7    | 1.4167 | 4.2258 | 1.0833 | 2.7268 | 2.1    | 0.0567 | 2.0129 |
| 4/15/2019 18:43 | 1.7    | 1.4167 | 4.1427 | 1.2667 | 2.7199 | 2.1    | 0.0506 | 2.0305 |
| 4/15/2019 18:44 | 1.7417 | 1.8    | 4.4768 | 1.05   | 2.7188 | 2.1    | 0.0658 | 2.0013 |
| 4/15/2019 18:45 | 1.8    | 1.75   | 4.3522 | 1.1167 | 2.7059 | 2.1    | 0.0498 | 2.0177 |

|                 |        |        |        |        |        |        |        |        |
|-----------------|--------|--------|--------|--------|--------|--------|--------|--------|
| 4/15/2019 18:46 | 1.8    | 1.7    | 4.2512 | 0.7333 | 2.6946 | 2.1    | 0.0615 | 2.0183 |
| 4/15/2019 18:47 | 1.8    | 1.8167 | 4.2257 | 0.8333 | 2.7039 | 2.1    | 0.0553 | 1.989  |
| 4/15/2019 18:48 | 1.8    | 1.3    | 4.2202 | 1.25   | 2.6983 | 2.1    | 0.0471 | 2.0131 |
| 4/15/2019 18:49 | 1.8    | 1.65   | 4.2172 | 1.2    | 2.7054 | 2.1    | 0.0641 | 1.9913 |
| 4/15/2019 18:50 | 1.8    | 0.8833 | 4.3012 | 0.9333 | 2.6705 | 2.1    | 0.048  | 1.9663 |
| 4/15/2019 18:51 | 1.8    | 1.5333 | 4.174  | 1.5667 | 2.6634 | 2.1    | 0.0668 | 1.9932 |
| 4/15/2019 18:52 | 1.8    | 0.6    | 4.0643 | 1.0667 | 2.6846 | 2.1    | 0.0559 | 2.0051 |
| 4/15/2019 18:53 | 1.8    | 1.4833 | 4.3077 | 1.5    | 2.6816 | 2.1    | 0.0524 | 2.0004 |
| 4/15/2019 18:54 | 1.7833 | 1.95   | 4.298  | 1.1833 | 2.6808 | 2.1    | 0.0622 | 1.986  |
| 4/15/2019 18:55 | 1.7167 | 1.3    | 4.2007 | 0.7667 | 2.6758 | 2.1    | 0.0521 | 1.9606 |
| 4/15/2019 18:56 | 1.6667 | 1.0833 | 4.1962 | 1.2667 | 2.6563 | 2.1    | 0.0609 | 1.958  |
| 4/15/2019 18:57 | 1.6583 | 1.35   | 4.0551 | 1.2833 | 2.6494 | 2.1    | 0.052  | 1.994  |
| 4/15/2019 18:58 | 1.6667 | 1.4    | 4.1437 | 1      | 2.6489 | 2.1    | 0.0555 | 1.9949 |
| 4/15/2019 18:59 | 1.7083 | 1.3167 | 4.1033 | 0.8667 | 2.6598 | 2.1    | 0.0624 | 1.9772 |
| 4/15/2019 19:00 | 1.7083 | 1.65   | 4.3653 | 1.3    | 2.6631 | 2.1    | 0.0506 | 1.9482 |
| 4/15/2019 19:01 | 1.7    | 0.9167 | 4.2173 | 0.7    | 2.6518 | 2.1    | 0.0633 | 1.9664 |
| 4/15/2019 19:02 | 1.7    | 1.4667 | 4.3866 | 1.65   | 2.6617 | 2.1    | 0.0569 | 1.9678 |
| 4/15/2019 19:03 | 1.7    | 0.6167 | 4.2973 | 1.2833 | 2.6737 | 2.1    | 0.0531 | 1.9454 |
| 4/15/2019 19:04 | 1.7    | 1.1    | 4.5401 | 1.2167 | 2.6598 | 2.2    | 0.0662 | 1.9504 |
| 4/15/2019 19:05 | 1.65   | 1.5    | 4.0398 | 1.1333 | 2.6612 | 2.2    | 0.0456 | 1.9749 |
| 4/15/2019 19:06 | 1.6    | 0.8333 | 4.2774 | 1.2667 | 2.6628 | 2.2    | 0.058  | 1.9779 |
| 4/15/2019 19:07 | 1.5917 | 1.5167 | 4.2076 | 1.0333 | 2.6505 | 2.2    | 0.0487 | 2.003  |
| 4/15/2019 19:08 | 1.5917 | 1.8667 | 4.3013 | 0.95   | 2.6665 | 2.2    | 0.0596 | 1.9646 |
| 4/15/2019 19:09 | 1.6    | 1      | 4.1228 | 0.9167 | 2.6472 | 2.1091 | 0.0497 | 1.9478 |
| 4/15/2019 19:10 | 1.6    | 1.2    | 4.196  | 0.5667 | 2.6572 | 2.1    | 0.0478 | 1.9503 |
| 4/15/2019 19:11 | 1.6667 | 1.25   | 4.0429 | 1.25   | 2.6683 | 2.1091 | 0.0612 | 1.97   |
| 4/15/2019 19:12 | 1.7    | 0.8667 | 3.975  | 1.05   | 2.6606 | 2.2    | 0.0465 | 1.9665 |
| 4/15/2019 19:13 | 1.6833 | 1.45   | 4.015  | 0.6833 | 2.6627 | 2.2    | 0.0632 | 1.9746 |
| 4/15/2019 19:14 | 1.7    | 0.95   | 4.2723 | 0.7333 | 2.6665 | 2.2    | 0.0435 | 1.9635 |
| 4/15/2019 19:15 | 1.7    | 0.5833 | 4.0487 | 0.8    | 2.6564 | 2.2    | 0.0538 | 1.9533 |
| 4/15/2019 19:16 | 1.7    | 1.0167 | 4.2402 | 1.5    | 2.6682 | 2.2    | 0.0565 | 1.9697 |
| 4/15/2019 19:17 | 1.7    | 1.4167 | 4.2731 | 1.55   | 2.6701 | 2.2    | 0.0494 | 1.9629 |
| 4/15/2019 19:18 | 1.6917 | 1.1833 | 4.1659 | 0.9    | 2.6598 | 2.2    | 0.0629 | 1.9818 |
| 4/15/2019 19:19 | 1.6    | 1.3    | 4.167  | 1.3833 | 2.6625 | 2.2    | 0.0472 | 1.9638 |
| 4/15/2019 19:20 | 1.6    | 0.7167 | 4.0957 | 1.7    | 2.6757 | 2.2    | 0.0541 | 1.9522 |
| 4/15/2019 19:21 | 1.6    | 1.3    | 4.2513 | 1.3833 | 2.6794 | 2.2    | 0.0524 | 1.9495 |
| 4/15/2019 19:22 | 1.5667 | 0.95   | 4.1129 | 0.7167 | 2.6748 | 2.2    | 0.0501 | 1.9482 |
| 4/15/2019 19:23 | 1.6    | 0.8667 | 3.8917 | 1.5    | 2.6779 | 2.2    | 0.0566 | 1.9451 |
| 4/15/2019 19:24 | 1.6    | 1.7333 | 4.1798 | 1.1167 | 2.682  | 2.2    | 0.0393 | 1.9714 |
| 4/15/2019 19:25 | 1.6    | 1.2333 | 4.0787 | 1.2    | 2.6758 | 2.2182 | 0.0569 | 1.9657 |
| 4/15/2019 19:26 | 1.6    | 1.05   | 3.9958 | 1.2667 | 2.6852 | 2.3    | 0.0529 | 1.9628 |
| 4/15/2019 19:27 | 1.6    | 1.3667 | 4.0374 | 1.05   | 2.6859 | 2.3    | 0.054  | 1.9653 |
| 4/15/2019 19:28 | 1.6    | 0.9333 | 4.0701 | 1.2    | 2.6718 | 2.3    | 0.0589 | 1.953  |
| 4/15/2019 19:29 | 1.6    | 0.6    | 3.9435 | 0.8167 | 2.6747 | 2.3    | 0.0497 | 1.9293 |
| 4/15/2019 19:30 | 1.5583 | 1.6667 | 4.048  | 1.5667 | 2.6858 | 2.3    | 0.0585 | 1.9215 |
| 4/15/2019 19:31 | 1.5667 | 0.75   | 3.9836 | 1.4167 | 2.7019 | 2.3    | 0.0459 | 1.9025 |
| 4/15/2019 19:32 | 1.525  | 0.8833 | 4.1097 | 0.9833 | 2.7062 | 2.3    | 0.0473 | 1.9159 |

|                 |        |        |        |        |        |        |        |        |
|-----------------|--------|--------|--------|--------|--------|--------|--------|--------|
| 4/15/2019 19:33 | 1.5    | 1.4333 | 3.9748 | 1.2167 | 2.723  | 2.3    | 0.0596 | 1.8953 |
| 4/15/2019 19:34 | 1.525  | 0.9667 | 4.0629 | 1.1167 | 2.6996 | 2.3636 | 0.04   | 1.9263 |
| 4/15/2019 19:35 | 1.6    | 2.0333 | 3.9617 | 1.3333 | 2.7004 | 2.4    | 0.0535 | 1.9698 |
| 4/15/2019 19:36 | 1.6    | 1.6167 | 3.7237 | 0.8833 | 2.6975 | 2.4    | 0.0379 | 1.9496 |
| 4/15/2019 19:37 | 1.5833 | 0.8833 | 3.8032 | 1.5    | 2.7135 | 2.4    | 0.0545 | 1.9123 |
| 4/15/2019 19:38 | 1.5833 | 1.2667 | 4.0514 | 1.1667 | 2.7088 | 2.4    | 0.0497 | 1.935  |
| 4/15/2019 19:39 | 1.5833 | 1.4667 | 4.06   | 1.3    | 2.7119 | 2.4    | 0.0453 | 1.953  |
| 4/15/2019 19:40 | 1.5833 | 1.7333 | 4.1441 | 0.9833 | 2.7286 | 2.4    | 0.0558 | 1.9533 |
| 4/15/2019 19:41 | 1.575  | 1.1167 | 3.9272 | 1.1667 | 2.7278 | 2.4    | 0.0427 | 1.9697 |
| 4/15/2019 19:42 | 1.6    | 0.6333 | 4.016  | 0.85   | 2.733  | 2.4    | 0.058  | 1.97   |
| 4/15/2019 19:43 | 1.6    | 0.9667 | 4.0707 | 1.2333 | 2.733  | 2.4    | 0.0471 | 1.9276 |
| 4/15/2019 19:44 | 1.6167 | 1.2667 | 3.8028 | 1.1    | 2.7597 | 2.4364 | 0.0426 | 1.9199 |
| 4/15/2019 19:45 | 1.6    | 0.85   | 4.0076 | 0.7    | 2.7576 | 2.5    | 0.0564 | 1.9463 |
| 4/15/2019 19:46 | 1.5167 | 1.1    | 3.6605 | 0.55   | 2.7758 | 2.5    | 0.0407 | 1.9578 |
| 4/15/2019 19:47 | 1.5    | 1.1167 | 3.7673 | 1.2333 | 2.8259 | 2.5    | 0.0571 | 1.9334 |
| 4/15/2019 19:48 | 1.55   | 1.4    | 4.1007 | 0.8833 | 2.8569 | 2.5167 | 0.0488 | 1.9143 |
| 4/15/2019 19:49 | 1.575  | 1.4333 | 3.9178 | 1.0667 | 2.8732 | 2.6    | 0.0461 | 1.9372 |
| 4/15/2019 19:50 | 1.5583 | 0.9    | 4.1235 | 1.2167 | 2.8458 | 2.6    | 0.0572 | 1.9541 |
| 4/15/2019 19:51 | 1.4917 | 1.4833 | 3.6522 | 0.7833 | 2.8443 | 2.6    | 0.0372 | 1.9293 |
| 4/15/2019 19:52 | 1.45   | 1.1833 | 3.9226 | 0.25   | 2.8783 | 2.6    | 0.0551 | 1.9255 |
| 4/15/2019 19:53 | 1.45   | 0.8667 | 4.0595 | 0.95   | 2.8976 | 2.6    | 0.0546 | 1.9176 |
| 4/15/2019 19:54 | 1.5    | 1.1167 | 3.6854 | 0.4833 | 2.9231 | 2.6    | 0.0521 | 1.9323 |
| 4/15/2019 19:55 | 1.5    | 0.9333 | 3.9176 | 1.3833 | 2.9443 | 2.6    | 0.0559 | 1.9119 |
| 4/15/2019 19:56 | 1.5    | 0.7333 | 3.8985 | 0.7167 | 2.9728 | 2.6    | 0.0397 | 1.8886 |
| 4/15/2019 19:57 | 1.5    | 1.2167 | 3.7529 | 0.75   | 2.9433 | 2.6    | 0.058  | 1.9409 |
| 4/15/2019 19:58 | 1.4    | 0.9333 | 3.8243 | 0.5667 | 2.9687 | 2.5545 | 0.0475 | 1.9436 |
| 4/15/2019 19:59 | 1.35   | 1      | 3.9729 | 0.55   | 2.9682 | 2.5    | 0.0489 | 1.9473 |
| 4/15/2019 20:00 | 1.3583 | 1.35   | 3.8898 | 0.6667 | 2.9991 | 2.5    | 0.0556 | 1.9363 |
| 4/15/2019 20:01 | 1.4    | 1.15   | 3.9452 | 0.7667 | 3.0283 | 2.5    | 0.0456 | 1.9188 |
| 4/15/2019 20:02 | 1.4    | 0.9833 | 3.9553 | 0.3167 | 2.9958 | 2.5    | 0.0541 | 1.9318 |
| 4/15/2019 20:03 | 1.4    | 0.7833 | 3.8698 | 1.2667 | 3.0195 | 2.5    | 0.0515 | 1.9364 |
| 4/15/2019 20:04 | 1.4    | 1.15   | 3.6223 | 1.15   | 3.0228 | 2.5    | 0.0532 | 1.953  |
| 4/15/2019 20:05 | 1.4    | 0.9    | 3.8026 | 1.0167 | 3.0398 | 2.5    | 0.0557 | 1.9363 |
| 4/15/2019 20:06 | 1.425  | 1.4167 | 3.7783 | 0.8    | 3.0554 | 2.5    | 0.0502 | 1.8797 |
| 4/15/2019 20:07 | 1.5    | 0.5    | 4.1355 | 0.9    | 3.0434 | 2.4167 | 0.0587 | 1.8943 |
| 4/15/2019 20:08 | 1.4167 | 0.2833 | 3.9175 | 0.9167 | 3.078  | 2.4    | 0.0489 | 1.9025 |
| 4/15/2019 20:09 | 1.4    | 0.65   | 3.6178 | 0.3833 | 3.0602 | 2.475  | 0.0514 | 1.9298 |
| 4/15/2019 20:10 | 1.45   | 1.1167 | 3.8652 | 0.4167 | 3.0471 | 2.5    | 0.0532 | 1.9248 |
| 4/15/2019 20:11 | 1.4333 | 1.6333 | 3.7303 | 0.8167 | 3.0762 | 2.4818 | 0.0454 | 1.911  |
| 4/15/2019 20:12 | 1.4    | 0.4167 | 3.5684 | 0.8    | 3.0903 | 2.4    | 0.0624 | 1.9172 |
| 4/15/2019 20:13 | 1.4583 | 0.6333 | 3.8597 | 1.1167 | 3.111  | 2.4    | 0.0477 | 1.9064 |
| 4/15/2019 20:14 | 1.4417 | 0.7833 | 3.7187 | 0.7167 | 3.1194 | 2.4    | 0.0567 | 1.8968 |
| 4/15/2019 20:15 | 1.4    | 0.65   | 3.5737 | 1.0667 | 3.1231 | 2.4    | 0.0501 | 1.9149 |
| 4/15/2019 20:16 | 1.4    | 1.3167 | 3.9113 | 0.5333 | 3.1659 | 2.4    | 0.0507 | 1.8728 |
| 4/15/2019 20:17 | 1.4167 | 1.1667 | 3.7252 | 0.8    | 3.1554 | 2.4    | 0.0659 | 1.8918 |
| 4/15/2019 20:18 | 1.4    | 0.55   | 3.8481 | 0.8    | 3.127  | 2.4    | 0.0438 | 1.9323 |
| 4/15/2019 20:19 | 1.4    | 0.5667 | 3.7674 | 0.8833 | 3.1572 | 2.4    | 0.0556 | 1.9418 |

|                 |        |        |        |        |        |        |        |        |
|-----------------|--------|--------|--------|--------|--------|--------|--------|--------|
| 4/15/2019 20:20 | 1.4    | 1.0333 | 3.837  | 1.05   | 3.1858 | 2.4    | 0.0532 | 1.9185 |
| 4/15/2019 20:21 | 1.4    | 1.05   | 3.5554 | 0.2833 | 3.1745 | 2.4    | 0.0564 | 1.9031 |
| 4/15/2019 20:22 | 1.4    | 0.0667 | 3.7104 | 0.8    | 3.1621 | 2.4    | 0.0563 | 1.8978 |
| 4/15/2019 20:23 | 1.3917 | 0.8667 | 3.8223 | 1      | 3.1667 | 2.4    | 0.0507 | 1.8922 |
| 4/15/2019 20:24 | 1.4    | 0.55   | 3.6812 | 0.4    | 3.1912 | 2.35   | 0.0647 | 1.9059 |
| 4/15/2019 20:25 | 1.375  | 0.8    | 3.7769 | 0.35   | 3.1848 | 2.3    | 0.0515 | 1.9078 |
| 4/15/2019 20:26 | 1.3    | 1.2833 | 4.0121 | 0.3833 | 3.1869 | 2.3    | 0.064  | 1.9028 |
| 4/15/2019 20:27 | 1.25   | 0.85   | 3.7405 | 0.5333 | 3.2092 | 2.3    | 0.0566 | 1.9038 |
| 4/15/2019 20:28 | 1.2    | 0.7667 | 3.7257 | 0.2    | 3.1838 | 2.3    | 0.0515 | 1.9061 |
| 4/15/2019 20:29 | 1.1917 | 1.0333 | 3.6623 | 1.05   | 3.2123 | 2.3    | 0.0639 | 1.9147 |
| 4/15/2019 20:30 | 1.1333 | 1.0333 | 3.529  | 0.9167 | 3.2049 | 2.3    | 0.0514 | 1.8979 |
| 4/15/2019 20:31 | 1.1583 | 0.75   | 3.6698 | 0.75   | 3.228  | 2.3273 | 0.0597 | 1.8737 |
| 4/15/2019 20:32 | 1.2    | 0.9167 | 3.7905 | 0.8833 | 3.2273 | 2.3091 | 0.0606 | 1.8883 |
| 4/15/2019 20:33 | 1.2917 | 0.65   | 3.74   | 0.7    | 3.2293 | 2.3    | 0.0528 | 1.902  |
| 4/15/2019 20:34 | 1.375  | 0.3667 | 3.9647 | 1.4667 | 3.2351 | 2.3    | 0.0623 | 1.8979 |
| 4/15/2019 20:35 | 1.4    | 0.9333 | 3.7387 | 1.35   | 3.2385 | 2.3    | 0.0493 | 1.922  |
| 4/15/2019 20:36 | 1.375  | 1.3667 | 3.7182 | 0.9833 | 3.2368 | 2.3    | 0.0661 | 1.8972 |
| 4/15/2019 20:37 | 1.2818 | 0.9667 | 3.7493 | 0.8167 | 3.2156 | 2.3909 | 0.05   | 1.8507 |
| 4/15/2019 20:38 | 1.3    | 1.15   | 3.9213 | 1.1833 | 3.2407 | 2.3273 | 0.0577 | 1.8803 |
| 4/15/2019 20:39 | 1.3    | 0.9333 | 3.8722 | 1.4833 | 3.1924 | 2.3273 | 0.061  | 1.897  |
| 4/15/2019 20:40 | 1.3    | 1.1667 | 3.7215 | 0.8667 | 3.2196 | 2.3    | 0.0484 | 1.9022 |
| 4/15/2019 20:41 | 1.2417 | 1.1167 | 3.8382 | 0.7167 | 3.2149 | 2.3    | 0.0661 | 1.9083 |
| 4/15/2019 20:42 | 1.2167 | 1.2833 | 3.6212 | 1.25   | 3.2033 | 2.3333 | 0.0546 | 1.9173 |
| 4/15/2019 20:43 | 1.3    | 0.65   | 3.7658 | 0.7333 | 3.217  | 2.3833 | 0.0632 | 1.9221 |
| 4/15/2019 20:44 | 1.3    | 0.5667 | 3.7127 | 1.1833 | 3.217  | 2.3455 | 0.0564 | 1.9113 |
| 4/15/2019 20:45 | 1.3917 | 0.4667 | 3.862  | 0.6333 | 3.2361 | 2.4    | 0.0603 | 1.8878 |
| 4/15/2019 20:46 | 1.4    | 1.0667 | 3.7578 | 0.3667 | 3.2207 | 2.4    | 0.0593 | 1.8833 |
| 4/15/2019 20:47 | 1.4    | 0.65   | 3.7388 | 0.6333 | 3.2248 | 2.4    | 0.0531 | 1.8948 |
| 4/15/2019 20:48 | 1.4    | 1.3167 | 3.8927 | 1.2833 | 3.2351 | 2.4    | 0.0598 | 1.8953 |
| 4/15/2019 20:49 | 1.3083 | 0.5333 | 3.8913 | 0.8    | 3.2303 | 2.4    | 0.0585 | 1.9019 |
| 4/15/2019 20:50 | 1.3    | 1.1333 | 3.87   | 1.2333 | 3.2518 | 2.4    | 0.0603 | 1.8809 |
| 4/15/2019 20:51 | 1.3    | 1.1333 | 3.775  | 0.85   | 3.2574 | 2.4    | 0.065  | 1.8376 |
| 4/15/2019 20:52 | 1.3    | 1.1833 | 3.9087 | 0.4333 | 3.2257 | 2.4    | 0.0494 | 1.8788 |
| 4/15/2019 20:53 | 1.3    | 0.7167 | 3.4875 | 1.15   | 3.2116 | 2.4    | 0.0617 | 1.8856 |
| 4/15/2019 20:54 | 1.275  | 0.5667 | 3.8023 | 0.65   | 3.2421 | 2.4    | 0.047  | 1.8658 |
| 4/15/2019 20:55 | 1.275  | 1.2833 | 3.8795 | 1.1167 | 3.26   | 2.4    | 0.0713 | 1.8619 |
| 4/15/2019 20:56 | 1.3    | 0.75   | 3.9077 | 0.7167 | 3.2438 | 2.4    | 0.0618 | 1.8505 |
| 4/15/2019 20:57 | 1.2417 | 0.85   | 3.741  | 0.9667 | 3.2496 | 2.4    | 0.055  | 1.8437 |
| 4/15/2019 20:58 | 1.2    | 0.35   | 3.7653 | 1.3333 | 3.2562 | 2.4    | 0.0637 | 1.8518 |
| 4/15/2019 20:59 | 1.2    | 0.3667 | 3.8115 | 1.3833 | 3.2515 | 2.4    | 0.042  | 1.893  |
| 4/15/2019 21:00 | 1.2    | 1.25   | 3.805  | 0.65   | 3.2412 | 2.4    | 0.0667 | 1.8797 |
| 4/15/2019 21:01 | 1.275  | 0.7833 | 3.5125 | 0.75   | 3.2838 | 2.4    | 0.055  | 1.8709 |
| 4/15/2019 21:02 | 1.275  | 1.6333 | 3.6185 | 1.05   | 3.2488 | 2.4    | 0.0537 | 1.8681 |
| 4/15/2019 21:03 | 1.3    | 0.55   | 3.6293 | 0.6333 | 3.2585 | 2.4    | 0.067  | 1.889  |
| 4/15/2019 21:04 | 1.3    | 1.0167 | 3.6685 | 1.0333 | 3.2838 | 2.4    | 0.0484 | 1.8873 |
| 4/15/2019 21:05 | 1.3    | 0      | 3.7695 | 1.1    | 3.2966 | 2.3667 | 0.0619 | 1.8793 |
| 4/15/2019 21:06 | 1.35   | 0.7    | 3.7383 | 0.65   | 3.2781 | 2.3    | 0.0577 | 1.8873 |

|                 |        |        |        |        |        |        |        |        |
|-----------------|--------|--------|--------|--------|--------|--------|--------|--------|
| 4/15/2019 21:07 | 1.4    | 0.7333 | 3.8252 | 0.5833 | 3.2845 | 2.3    | 0.0529 | 1.8783 |
| 4/15/2019 21:08 | 1.4    | 0.3667 | 3.9182 | 0.6167 | 3.2768 | 2.325  | 0.0572 | 1.8713 |
| 4/15/2019 21:09 | 1.4    | 0.9833 | 4.1175 | 1.1    | 3.262  | 2.3    | 0.0515 | 1.8485 |
| 4/15/2019 21:10 | 1.3583 | 1.1833 | 3.7127 | 1.1167 | 3.2927 | 2.3    | 0.0637 | 1.8657 |
| 4/15/2019 21:11 | 1.45   | 1.25   | 3.8852 | 0.5667 | 3.3184 | 2.3    | 0.0464 | 1.8601 |
| 4/15/2019 21:12 | 1.475  | 0.2    | 4.1402 | 1.1    | 3.3067 | 2.3    | 0.0587 | 1.8598 |
| 4/15/2019 21:13 | 1.4417 | 0.7833 | 3.8332 | 0.9167 | 3.2901 | 2.3    | 0.0545 | 1.842  |
| 4/15/2019 21:14 | 1.4333 | 0.8    | 3.7242 | 0.7    | 3.2998 | 2.3    | 0.0542 | 1.8486 |
| 4/15/2019 21:15 | 1.4167 | 0.7833 | 3.5872 | 0.55   | 3.3093 | 2.3    | 0.0597 | 1.8516 |
| 4/15/2019 21:16 | 1.4917 | 1.3667 | 4.0905 | 0.6    | 3.3313 | 2.3    | 0.0467 | 1.8626 |
| 4/15/2019 21:17 | 1.475  | 0.8833 | 3.848  | 0.9    | 3.3177 | 2.3    | 0.0677 | 1.858  |
| 4/15/2019 21:18 | 1.4364 | 0.5667 | 3.757  | 1.1333 | 3.3024 | 2.4    | 0.053  | 1.8868 |
| 4/15/2019 21:19 | 1.4583 | 1.3333 | 3.8733 | 1.3    | 3.2956 | 2.3417 | 0.0551 | 1.8782 |
| 4/15/2019 21:20 | 1.4    | 1.15   | 3.9622 | 0.7833 | 3.3007 | 2.3    | 0.0678 | 1.851  |
| 4/15/2019 21:21 | 1.4333 | 1.1    | 4.1648 | 1.05   | 3.3038 | 2.3    | 0.0512 | 1.827  |
| 4/15/2019 21:22 | 1.4    | 0.9833 | 3.8887 | 0.9333 | 3.3023 | 2.3545 | 0.0716 | 1.8228 |
| 4/15/2019 21:23 | 1.4    | 0.4    | 3.88   | 0.5    | 3.2719 | 2.3    | 0.0571 | 1.8423 |
| 4/15/2019 21:24 | 1.375  | 0.3667 | 3.7477 | 0.8333 | 3.313  | 2.3    | 0.0493 | 1.8438 |
| 4/15/2019 21:25 | 1.3083 | 1.25   | 3.6908 | 1.3    | 3.3218 | 2.3    | 0.0718 | 1.8523 |
| 4/15/2019 21:26 | 1.3083 | 1.2667 | 4.0055 | 0.7    | 3.3167 | 2.3    | 0.0569 | 1.8676 |
| 4/15/2019 21:27 | 1.3    | 1.3167 | 3.7037 | 1.2667 | 3.319  | 2.325  | 0.0621 | 1.8186 |
| 4/15/2019 21:28 | 1.3    | 1.2667 | 3.7112 | 1.2167 | 3.2965 | 2.3    | 0.0484 | 1.8658 |
| 4/15/2019 21:29 | 1.3167 | 0.95   | 3.6548 | 1.25   | 3.3298 | 2.3    | 0.055  | 1.8501 |
| 4/15/2019 21:30 | 1.3333 | 1.0667 | 3.8528 | 1.1833 | 3.3178 | 2.3    | 0.0657 | 1.8377 |
| 4/15/2019 21:31 | 1.375  | 1.1333 | 3.8312 | 0.5333 | 3.3285 | 2.3    | 0.0489 | 1.8694 |
| 4/15/2019 21:32 | 1.3083 | 1.05   | 3.7155 | 0.9    | 3.3176 | 2.4    | 0.0592 | 1.854  |
| 4/15/2019 21:33 | 1.3417 | 0.75   | 3.587  | 0.9    | 3.3313 | 2.4    | 0.0472 | 1.8641 |
| 4/15/2019 21:34 | 1.3333 | 1      | 3.4617 | 0.8333 | 3.3268 | 2.4    | 0.0454 | 1.8767 |
| 4/15/2019 21:35 | 1.35   | 1.1    | 3.426  | 1.0167 | 3.3363 | 2.4    | 0.0486 | 1.855  |
| 4/15/2019 21:36 | 1.3    | 0.55   | 3.3205 | 0.5333 | 3.3263 | 2.4    | 0.0472 | 1.8372 |
| 4/15/2019 21:37 | 1.3    | 1.45   | 3.5423 | 1.1833 | 3.3432 | 2.5    | 0.0648 | 1.8133 |
| 4/15/2019 21:38 | 1.325  | 0.6333 | 3.732  | 1.0167 | 3.3447 | 2.5    | 0.0438 | 1.8369 |
| 4/15/2019 21:39 | 1.3833 | 0.8167 | 3.5555 | 0.25   | 3.3331 | 2.5909 | 0.0622 | 1.858  |
| 4/15/2019 21:40 | 1.4    | 0.9833 | 3.8877 | 0.4833 | 3.3711 | 2.6    | 0.059  | 1.8554 |
| 4/15/2019 21:41 | 1.3583 | 0.8833 | 3.8187 | 0.7    | 3.3662 | 2.6    | 0.0438 | 1.8569 |
| 4/15/2019 21:42 | 1.3    | 1.0667 | 3.6877 | 0.9    | 3.3734 | 2.6167 | 0.0597 | 1.8663 |
| 4/15/2019 21:43 | 1.3    | 0.7333 | 3.7192 | 0.5167 | 3.3782 | 2.7    | 0.0454 | 1.8723 |
| 4/15/2019 21:44 | 1.3083 | 0.8833 | 3.5232 | 0.9333 | 3.3935 | 2.7    | 0.059  | 1.8536 |
| 4/15/2019 21:45 | 1.3    | 0.5    | 3.4675 | 0.6167 | 3.393  | 2.6833 | 0.0624 | 1.8688 |
| 4/15/2019 21:46 | 1.3    | 0.6833 | 3.6328 | 0.7    | 3.3932 | 2.6    | 0.0531 | 1.8473 |
| 4/15/2019 21:47 | 1.2667 | 1.3333 | 3.33   | 1.0833 | 3.4008 | 2.6    | 0.0598 | 1.8533 |
| 4/15/2019 21:48 | 1.2417 | 1.15   | 3.5802 | 0.8    | 3.4104 | 2.6    | 0.0439 | 1.8542 |
| 4/15/2019 21:49 | 1.2    | 0.6667 | 3.5995 | 0.9    | 3.4155 | 2.6    | 0.0633 | 1.8682 |
| 4/15/2019 21:50 | 1.2    | 1.1    | 3.525  | 1.2    | 3.4056 | 2.6    | 0.0555 | 1.8744 |
| 4/15/2019 21:51 | 1.2    | 1.25   | 3.5458 | 1.1167 | 3.4476 | 2.5667 | 0.0528 | 1.8693 |
| 4/15/2019 21:52 | 1.2    | 0.8833 | 3.6993 | 1.8333 | 3.4712 | 2.5    | 0.057  | 1.843  |
| 4/15/2019 21:53 | 1.2    | 0.8833 | 3.7423 | 1.1333 | 3.4709 | 2.5    | 0.0468 | 1.8398 |

|                 |        |         |        |         |        |        |        |        |
|-----------------|--------|---------|--------|---------|--------|--------|--------|--------|
| 4/15/2019 21:54 | 1.1833 | 1.1167  | 3.495  | 0.7333  | 3.4993 | 2.5    | 0.0663 | 1.8463 |
| 4/15/2019 21:55 | 1.1583 | 0.3     | 3.613  | 0.85    | 3.5148 | 2.5    | 0.054  | 1.8657 |
| 4/15/2019 21:56 | 1.1    | 0.4833  | 3.6544 | 0.85    | 3.4951 | 2.475  | 0.0542 | 1.8336 |
| 4/15/2019 21:57 | 1.1833 | 0.6833  | 3.6674 | 0.5     | 3.4803 | 2.5    | 0.0651 | 1.8212 |
| 4/15/2019 21:58 | 1.1917 | 1.2333  | 3.7743 | 0.3833  | 3.4956 | 2.4273 | 0.0519 | 1.8266 |
| 4/15/2019 21:59 | 1.2    | 0.8333  | 3.7847 | 1.0167  | 3.5564 | 2.4    | 0.0611 | 1.8338 |
| 4/15/2019 22:00 | 1.1583 | 1.35    | 3.6085 | 0.85    | 3.5059 | 2.4    | 0.0494 | 1.8447 |
| 4/15/2019 22:01 | 1.1    | 1.45    | 3.4512 | 0.7667  | 3.5427 | 2.4    | 0.0591 | 1.8293 |
| 4/15/2019 22:02 | 1.1    | 1.15    | 3.4224 | 0.85    | 3.5798 | 2.3636 | 0.0652 | 1.8525 |
| 4/15/2019 22:03 | 1.1833 | 1.3333  | 3.6902 | 0.8667  | 3.602  | 2.3182 | 0.0491 | 1.8119 |
| 4/15/2019 22:04 | 1.1333 | 0.55    | 3.5033 | 0.05    | 3.5398 | 2.4    | 0.0607 | 1.8424 |
| 4/15/2019 22:05 | 1.1333 | 0.4667  | 3.3622 | 0.45    | 3.601  | 2.4    | 0.0494 | 1.844  |
| 4/15/2019 22:06 | 1.1    | 0.2333  | 3.4717 | 0.4333  | 3.6671 | 2.4    | 0.0578 | 1.7921 |
| 4/15/2019 22:07 | 1.1333 | 0.8833  | 3.7524 | 0.15    | 3.6228 | 2.4    | 0.0585 | 1.7713 |
| 4/15/2019 22:08 | 1.2    | 0.2     | 3.2961 | 0.8167  | 3.687  | 2.4    | 0.0484 | 1.8053 |
| 4/15/2019 22:09 | 1.2333 | 0.7167  | 3.5055 | 0.6333  | 3.6724 | 2.3417 | 0.0662 | 1.7933 |
| 4/15/2019 22:10 | 1.275  | 0.3667  | 3.2868 | 1.1     | 3.7175 | 2.4    | 0.0514 | 1.8328 |
| 4/15/2019 22:11 | 1.2167 | 0.3167  | 3.502  | 0.3833  | 3.7189 | 2.3455 | 0.0567 | 1.8419 |
| 4/15/2019 22:12 | 1.2    | 1.2333  | 3.7076 | 0.45    | 3.6956 | 2.3    | 0.0462 | 1.8235 |
| 4/15/2019 22:13 | 1.175  | 1.3333  | 3.469  | 0.3     | 3.744  | 2.3    | 0.0551 | 1.8452 |
| 4/15/2019 22:14 | 1.1    | 1.4333  | 3.2723 | 0.6833  | 3.7721 | 2.3    | 0.0591 | 1.8354 |
| 4/15/2019 22:15 | 1.1    | 0.9167  | 3.2283 | 0.6167  | 3.862  | 2.3    | 0.0537 | 1.8253 |
| 4/15/2019 22:16 | 1.1    | -0.0167 | 3.0718 | 0.1667  | 3.8414 | 2.3    | 0.0626 | 1.8264 |
| 4/15/2019 22:17 | 1.0667 | 0.7     | 3.6771 | 0.8667  | 4.0088 | 2.3    | 0.0449 | 1.8053 |
| 4/15/2019 22:18 | 1      | 0.5     | 3.3843 | 1.0333  | 4.0802 | 2.3    | 0.0582 | 1.7996 |
| 4/15/2019 22:19 | 1      | 0.8167  | 3.1744 | 0.6     | 4.0439 | 2.3    | 0.0547 | 1.8074 |
| 4/15/2019 22:20 | 0.9917 | 0.9333  | 3.297  | 0.15    | 4.0946 | 2.3    | 0.0561 | 1.8203 |
| 4/15/2019 22:21 | 0.9167 | 1.5333  | 3.4873 | 0.3333  | 4.1346 | 2.3    | 0.0669 | 1.8138 |
| 4/15/2019 22:22 | 0.8833 | 1.1     | 3.0844 | 0.5     | 4.219  | 2.3    | 0.0449 | 1.7891 |
| 4/15/2019 22:23 | 0.8083 | 0.5667  | 3.489  | 0.3833  | 4.2909 | 2.375  | 0.0588 | 1.8179 |
| 4/15/2019 22:24 | 0.8    | 0.6333  | 3.1655 | 0.05    | 4.2413 | 2.4    | 0.0534 | 1.8553 |
| 4/15/2019 22:25 | 0.8    | 0.75    | 3.0825 | 0.2     | 4.3485 | 2.4417 | 0.0553 | 1.8526 |
| 4/15/2019 22:26 | 0.8    | 0.3833  | 3.1273 | 0.0667  | 4.3292 | 2.43   | 0.0586 | 1.826  |
| 4/15/2019 22:27 | 0.8    | 0.25    | 2.8233 | 0.1833  | 4.5756 | 2.5    | 0.0477 | 1.8384 |
| 4/15/2019 22:28 | 0.8    | 0.1833  | 2.854  | 0.4333  | 4.5183 | 2.5    | 0.0731 | 1.8419 |
| 4/15/2019 22:29 | 0.8    | 0.35    | 3.1085 | 0.2667  | 4.5236 | 2.5    | 0.0439 | 1.8402 |
| 4/15/2019 22:30 | 0.8083 | 0.4833  | 3.0912 | -0.2833 | 4.4519 | 2.575  | 0.049  | 1.8394 |
| 4/15/2019 22:31 | 0.8833 | 0.55    | 3.0686 | 0.45    | 4.7615 | 2.6    | 0.06   | 1.8358 |
| 4/15/2019 22:32 | 0.9    | 0.9167  | 3.2017 | 0.5     | 4.6808 | 2.6    | 0.0457 | 1.838  |
| 4/15/2019 22:33 | 0.875  | 0.5667  | 3.0012 | 0.1667  | 4.8631 | 2.6    | 0.0664 | 1.8503 |
| 4/15/2019 22:34 | 0.8333 | 0.7167  | 3.1218 | 0.2     | 4.8557 | 2.6    | 0.0552 | 1.8465 |
| 4/15/2019 22:35 | 0.8    | 0.6333  | 3.2296 | 0.7333  | 4.6585 | 2.6    | 0.0502 | 1.8605 |
| 4/15/2019 22:36 | 0.8    | 0.3167  | 2.8378 | -0.1833 | 4.9491 | 2.6    | 0.0539 | 1.8279 |
| 4/15/2019 22:37 | 0.8    | 0.55    | 3.2048 | 0       | 5.0112 | 2.6    | 0.0445 | 1.8093 |
| 4/15/2019 22:38 | 0.8    | 0.55    | 3.1429 | 0.4     | 4.9562 | 2.6    | 0.0616 | 1.7949 |
| 4/15/2019 22:39 | 0.8    | 0.35    | 3.1312 | 0.4833  | 4.8551 | 2.6    | 0.0523 | 1.8308 |
| 4/15/2019 22:40 | 0.8    | 0.7333  | 3.275  | 0.3667  | 5.1525 | 2.6    | 0.064  | 1.8343 |

|                 |        |         |        |         |        |        |        |        |
|-----------------|--------|---------|--------|---------|--------|--------|--------|--------|
| 4/15/2019 22:41 | 0.825  | 0.1667  | 3.0104 | -0.0333 | 5.1495 | 2.6    | 0.0496 | 1.8501 |
| 4/15/2019 22:42 | 0.825  | -0.0833 | 3.0348 | 0.0833  | 4.9253 | 2.6    | 0.0566 | 1.856  |
| 4/15/2019 22:43 | 0.8    | 0.5333  | 3.2623 | 0.7333  | 5.219  | 2.6    | 0.0635 | 1.8557 |
| 4/15/2019 22:44 | 0.7167 | -0.1    | 2.9744 | 0.3     | 5.2769 | 2.6    | 0.0474 | 1.8185 |
| 4/15/2019 22:45 | 0.7    | 0.6     | 3.075  | 0.1     | 5.3966 | 2.6    | 0.054  | 1.8223 |
| 4/15/2019 22:46 | 0.7    | 0.3667  | 2.8302 | 0.3     | 5.387  | 2.6    | 0.0571 | 1.8499 |
| 4/15/2019 22:47 | 0.7    | 0.6333  | 3.0459 | 0.4167  | 5.3761 | 2.6833 | 0.0554 | 1.8563 |
| 4/15/2019 22:48 | 0.7    | 0.2333  | 3.1289 | 0.6667  | 5.4388 | 2.7    | 0.0591 | 1.8402 |
| 4/15/2019 22:49 | 0.6083 | -0.0333 | 3.0878 | 0.35    | 5.45   | 2.7    | 0.0488 | 1.837  |
| 4/15/2019 22:50 | 0.6    | 1.2     | 3.1557 | 0.2167  | 5.391  | 2.7    | 0.0596 | 1.833  |
| 4/15/2019 22:51 | 0.6    | 0.0167  | 2.9027 | -0.0333 | 5.5798 | 2.6818 | 0.0495 | 1.8205 |
| 4/15/2019 22:52 | 0.6    | 0.2667  | 2.9695 | -0.0833 | 5.5397 | 2.6    | 0.0552 | 1.8243 |
| 4/15/2019 22:53 | 0.6    | 0.4833  | 3.0553 | 0.15    | 5.5725 | 2.6    | 0.0608 | 1.825  |
| 4/15/2019 22:54 | 0.6    | -0.2    | 2.9555 | -0.2667 | 5.6044 | 2.6    | 0.0478 | 1.8198 |
| 4/15/2019 22:55 | 0.5917 | 0       | 2.9896 | 0.2     | 5.6144 | 2.6    | 0.0612 | 1.8117 |
| 4/15/2019 22:56 | 0.6    | 0.3     | 2.719  | 0.5333  | 5.5546 | 2.6273 | 0.0463 | 1.8101 |
| 4/15/2019 22:57 | 0.6    | 0.2667  | 2.5893 | -0.3667 | 5.5626 | 2.6667 | 0.0589 | 1.8103 |
| 4/15/2019 22:58 | 0.5917 | 1.0667  | 2.853  | 0.05    | 5.5883 | 2.6    | 0.0622 | 1.8133 |
| 4/15/2019 22:59 | 0.5667 | 0.3667  | 3.0041 | 0.15    | 5.5951 | 2.6    | 0.0466 | 1.8281 |
| 4/15/2019 23:00 | 0.6    | -0.2167 | 2.9613 | 0.1833  | 5.7236 | 2.5727 | 0.0675 | 1.7954 |
| 4/15/2019 23:01 | 0.6    | 0       | 2.6092 | 0.55    | 5.6783 | 2.6    | 0.0496 | 1.8278 |
| 4/15/2019 23:02 | 0.6    | 0.0667  | 2.8605 | 0.5833  | 5.7392 | 2.5091 | 0.0605 | 1.8238 |
| 4/15/2019 23:03 | 0.6    | 0.5667  | 2.6548 | 0.5333  | 5.6484 | 2.55   | 0.0528 | 1.8267 |
| 4/15/2019 23:04 | 0.7    | 0.3     | 3.0847 | 0.0667  | 5.6658 | 2.6    | 0.0521 | 1.8301 |
| 4/15/2019 23:05 | 0.7    | -0.45   | 2.7888 | 0.3833  | 5.7267 | 2.6    | 0.0633 | 1.8119 |
| 4/15/2019 23:06 | 0.7    | -0.0333 | 2.633  | 0.25    | 5.7234 | 2.6    | 0.0487 | 1.8045 |
| 4/15/2019 23:07 | 0.7    | 0.1833  | 2.913  | -0.15   | 5.7309 | 2.6667 | 0.0609 | 1.7878 |
| 4/15/2019 23:08 | 0.6667 | 0.7833  | 2.926  | 0.5333  | 5.7663 | 2.6182 | 0.0535 | 1.7883 |
| 4/15/2019 23:09 | 0.625  | 0.1333  | 2.7746 | 0.6     | 5.7148 | 2.7    | 0.0562 | 1.829  |
| 4/15/2019 23:10 | 0.6167 | 0.5333  | 2.8708 | 0.2     | 5.7108 | 2.7    | 0.0606 | 1.8432 |
| 4/15/2019 23:11 | 0.6    | -0.3833 | 2.927  | 0.4667  | 5.7693 | 2.7    | 0.053  | 1.8518 |
| 4/15/2019 23:12 | 0.7    | 0.0667  | 2.8668 | 0.2833  | 5.7569 | 2.7    | 0.0582 | 1.8666 |
| 4/15/2019 23:13 | 0.7    | 1.05    | 2.7987 | 0.3167  | 5.776  | 2.7    | 0.0532 | 1.8617 |
| 4/15/2019 23:14 | 0.7    | 0.35    | 2.6253 | -0.1333 | 5.8388 | 2.66   | 0.0592 | 1.8258 |
| 4/15/2019 23:15 | 0.75   | 1.1833  | 2.8957 | -0.2167 | 5.7406 | 2.7    | 0.0533 | 1.8259 |
| 4/15/2019 23:16 | 0.8    | 0.5833  | 2.6846 | -0.1333 | 5.7689 | 2.7    | 0.0502 | 1.8256 |
| 4/15/2019 23:17 | 0.8    | 0.6     | 2.9263 | -0.0833 | 5.8067 | 2.7    | 0.064  | 1.8168 |
| 4/15/2019 23:18 | 0.8    | -0.1    | 2.6469 | -0.05   | 5.7744 | 2.7    | 0.0517 | 1.8027 |
| 4/15/2019 23:19 | 0.8    | 0.5167  | 2.5998 | 0.35    | 5.8638 | 2.7    | 0.0642 | 1.8183 |
| 4/15/2019 23:20 | 0.8    | 0.7333  | 2.7678 | 0.15    | 5.8741 | 2.7    | 0.0551 | 1.8267 |
| 4/15/2019 23:21 | 0.8    | 0.6667  | 2.8625 | -0.3    | 5.8324 | 2.7    | 0.0575 | 1.8126 |
| 4/15/2019 23:22 | 0.8    | 0.3833  | 2.9622 | 0.4     | 5.7869 | 2.775  | 0.0615 | 1.8208 |
| 4/15/2019 23:23 | 0.7167 | -0.25   | 3.0114 | 0.8667  | 5.7729 | 2.8    | 0.0538 | 1.8206 |
| 4/15/2019 23:24 | 0.7    | -0.6    | 2.6375 | 0.1333  | 5.8358 | 2.8    | 0.0643 | 1.8153 |
| 4/15/2019 23:25 | 0.6583 | 0.0167  | 2.9239 | 0.2     | 5.7988 | 2.8    | 0.0627 | 1.8343 |
| 4/15/2019 23:26 | 0.7    | 0.55    | 3.0028 | 0.0167  | 5.7843 | 2.82   | 0.0555 | 1.8063 |
| 4/15/2019 23:27 | 0.7    | 0.7667  | 2.8242 | -0.1833 | 5.7869 | 2.8636 | 0.065  | 1.8085 |



|                 |        |         |        |         |        |        |        |        |
|-----------------|--------|---------|--------|---------|--------|--------|--------|--------|
| 4/15/2019 23:28 | 0.7    | 1.1333  | 2.7718 | -0.2    | 5.7787 | 2.8    | 0.0495 | 1.8348 |
| 4/15/2019 23:29 | 0.6583 | 0.4333  | 2.9832 | -0.05   | 5.773  | 2.8    | 0.0746 | 1.8329 |
| 4/15/2019 23:30 | 0.6    | 0.4167  | 2.78   | 0.4667  | 5.7543 | 2.8    | 0.0503 | 1.8105 |
| 4/15/2019 23:31 | 0.5833 | 0.4333  | 2.6642 | 0.1     | 5.7053 | 2.8    | 0.0551 | 1.8066 |
| 4/15/2019 23:32 | 0.5667 | 1.05    | 2.9568 | 0.0667  | 5.7361 | 2.8    | 0.0605 | 1.8083 |
| 4/15/2019 23:33 | 0.6    | 0.1167  | 3.0645 | 0.5667  | 5.7152 | 2.8    | 0.0499 | 1.8355 |
| 4/15/2019 23:34 | 0.6917 | 0.4833  | 3.0287 | 0.6833  | 5.7042 | 2.7182 | 0.0628 | 1.8418 |
| 4/15/2019 23:35 | 0.7    | 0.1833  | 3.1183 | -0.1333 | 5.6665 | 2.7636 | 0.0581 | 1.8183 |
| 4/15/2019 23:36 | 0.7    | 0.3667  | 3.038  | 0.1833  | 5.6658 | 2.8    | 0.0608 | 1.8171 |
| 4/15/2019 23:37 | 0.7    | 0.2     | 3.0733 | 0.3167  | 5.641  | 2.8    | 0.0575 | 1.829  |
| 4/15/2019 23:38 | 0.7    | 0.3333  | 2.8088 | 0.15    | 5.6239 | 2.8    | 0.0496 | 1.8305 |
| 4/15/2019 23:39 | 0.7333 | 0.35    | 3.0542 | 0.0333  | 5.5983 | 2.8    | 0.0626 | 1.8182 |
| 4/15/2019 23:40 | 0.8    | 0.35    | 3.0642 | 0.2167  | 5.5554 | 2.8    | 0.0549 | 1.8308 |
| 4/15/2019 23:41 | 0.9    | 0.45    | 2.8422 | 0.3167  | 5.5572 | 2.8    | 0.0577 | 1.8202 |
| 4/15/2019 23:42 | 0.9    | 0.8833  | 2.9028 | -0.0333 | 5.5385 | 2.8    | 0.0566 | 1.7999 |
| 4/15/2019 23:43 | 0.85   | 0.5167  | 2.8632 | 0.1     | 5.5175 | 2.8    | 0.0503 | 1.7928 |
| 4/15/2019 23:44 | 0.8    | 0.4     | 2.9853 | 0.3167  | 5.4848 | 2.8    | 0.0602 | 1.803  |
| 4/15/2019 23:45 | 0.8    | 0.9167  | 3.0587 | 0.5333  | 5.4763 | 2.825  | 0.0495 | 1.8185 |
| 4/15/2019 23:46 | 0.8    | 0.0833  | 3.332  | 0.3     | 5.457  | 2.87   | 0.0617 | 1.8156 |
| 4/15/2019 23:47 | 0.8167 | 0.05    | 2.9463 | 0.1     | 5.451  | 2.8091 | 0.0572 | 1.814  |
| 4/15/2019 23:48 | 0.8    | 0.3667  | 2.955  | -0.0167 | 5.443  | 2.87   | 0.0526 | 1.8287 |
| 4/15/2019 23:49 | 0.8167 | 0.35    | 3.2003 | 0.4167  | 5.3827 | 2.8417 | 0.0607 | 1.8275 |
| 4/15/2019 23:50 | 0.8917 | 0.5     | 3.027  | 0.6667  | 5.3553 | 2.8    | 0.0473 | 1.8272 |
| 4/15/2019 23:51 | 0.925  | 0.2167  | 3.0532 | 1.1667  | 5.3423 | 2.8    | 0.0596 | 1.8108 |
| 4/15/2019 23:52 | 1      | 1.1333  | 2.966  | 0.2333  | 5.3233 | 2.8    | 0.0546 | 1.8384 |
| 4/15/2019 23:53 | 1      | 0.2333  | 3.1993 | 0.4667  | 5.3268 | 2.8    | 0.0573 | 1.8339 |
| 4/15/2019 23:54 | 0.9917 | -0.0333 | 3.257  | 0.5333  | 5.2969 | 2.8    | 0.0605 | 1.8015 |
| 4/15/2019 23:55 | 0.9667 | 0.65    | 3.1003 | 0.9167  | 5.2705 | 2.8    | 0.0491 | 1.8179 |
| 4/15/2019 23:56 | 0.975  | 0.8     | 3.0905 | 0.2667  | 5.2304 | 2.8    | 0.0615 | 1.8348 |
| 4/15/2019 23:57 | 1      | 0.7333  | 2.9657 | 0.8333  | 5.1958 | 2.8    | 0.0562 | 1.8543 |
| 4/15/2019 23:58 | 0.9833 | 0.3667  | 3.2072 | 0.9667  | 5.2013 | 2.8    | 0.0507 | 1.8304 |
| 4/15/2019 23:59 | 0.975  | 0.1333  | 3.2892 | 0.55    | 5.1848 | 2.7727 | 0.0558 | 1.8113 |
| 4/16/2019 0:00  | 0.9917 | 0.3833  | 3.3832 | 0.6833  | 5.1533 | 2.7    | 0.0404 | 1.7923 |
| 4/16/2019 0:01  | 0.9417 | -0.2667 | 3.2573 | 0.9333  | 5.1418 | 2.7    | 0.056  | 1.8121 |
| 4/16/2019 0:02  | 0.95   | 0.6667  | 3.2965 | 0.8667  | 5.1212 | 2.7    | 0.0478 | 1.8394 |
| 4/16/2019 0:03  | 1      | 0.55    | 3.2018 | 0.8333  | 5.0877 | 2.67   | 0.0468 | 1.8103 |
| 4/16/2019 0:04  | 1.0417 | 0.9667  | 3.1807 | 1.25    | 5.0874 | 2.6    | 0.054  | 1.8375 |
| 4/16/2019 0:05  | 1.0833 | 0.7333  | 3.108  | 0.2667  | 5.0857 | 2.6    | 0.0473 | 1.8177 |
| 4/16/2019 0:06  | 1.0833 | 1.3     | 3.2313 | 0.8333  | 5.0389 | 2.5091 | 0.0627 | 1.7813 |
| 4/16/2019 0:07  | 1.1    | 0.5167  | 3.283  | 0.4167  | 5.0215 | 2.5    | 0.0516 | 1.7997 |
| 4/16/2019 0:08  | 1.1833 | 1.25    | 3.2245 | 0.7     | 5.0134 | 2.5    | 0.0561 | 1.8276 |
| 4/16/2019 0:09  | 1.2    | 0.85    | 3.1603 | 0       | 5.0039 | 2.5    | 0.0551 | 1.8273 |
| 4/16/2019 0:10  | 1.2    | 0.5167  | 3.353  | 1.1333  | 4.9827 | 2.5    | 0.044  | 1.8017 |
| 4/16/2019 0:11  | 1.175  | 0.35    | 3.2675 | 0.4     | 4.9658 | 2.4545 | 0.0598 | 1.7993 |
| 4/16/2019 0:12  | 1.1333 | 0.2667  | 3.2842 | 1       | 4.9393 | 2.4    | 0.0509 | 1.7936 |
| 4/16/2019 0:13  | 1.1083 | 0.8167  | 3.2897 | 0.05    | 4.9326 | 2.4333 | 0.0499 | 1.7933 |
| 4/16/2019 0:14  | 1.1    | 0.5833  | 3.1998 | 1.0667  | 4.8943 | 2.48   | 0.0539 | 1.822  |

|                |        |        |        |        |        |        |        |        |
|----------------|--------|--------|--------|--------|--------|--------|--------|--------|
| 4/16/2019 0:15 | 1.05   | 0.2833 | 3.215  | 0.25   | 4.9224 | 2.4    | 0.0435 | 1.7894 |
| 4/16/2019 0:16 | 1      | 0.15   | 3.3263 | 0.45   | 4.883  | 2.4    | 0.0572 | 1.8102 |
| 4/16/2019 0:17 | 1      | 0.45   | 3.4703 | 1.1333 | 4.8783 | 2.4    | 0.043  | 1.8396 |
| 4/16/2019 0:18 | 1.05   | 0.35   | 3.3918 | 0.65   | 4.8411 | 2.4    | 0.0423 | 1.841  |
| 4/16/2019 0:19 | 1.1    | 0.9667 | 3.1667 | 1.05   | 4.8243 | 2.45   | 0.0533 | 1.8221 |
| 4/16/2019 0:20 | 1.1    | 1.15   | 3.0432 | 1.55   | 4.8295 | 2.5    | 0.0461 | 1.8114 |
| 4/16/2019 0:21 | 1.0417 | 0.6833 | 3.185  | 0.9333 | 4.8259 | 2.5    | 0.0535 | 1.7916 |
| 4/16/2019 0:22 | 1      | 0.5667 | 3.4425 | 1.1167 | 4.8215 | 2.5    | 0.0399 | 1.7896 |
| 4/16/2019 0:23 | 1      | 1.0333 | 3.3033 | 0.4667 | 4.8053 | 2.5    | 0.0565 | 1.799  |
| 4/16/2019 0:24 | 1      | 0.1333 | 3.199  | 1.2667 | 4.8126 | 2.5    | 0.0482 | 1.8049 |
| 4/16/2019 0:25 | 1      | 0.1333 | 3.3697 | 0.3    | 4.7928 | 2.5636 | 0.0465 | 1.7979 |
| 4/16/2019 0:26 | 1      | 0.2167 | 3.212  | 0.55   | 4.7888 | 2.5167 | 0.0591 | 1.7897 |
| 4/16/2019 0:27 | 1      | 0.2    | 2.9078 | 0.9333 | 4.7927 | 2.6    | 0.0377 | 1.7712 |
| 4/16/2019 0:28 | 0.9917 | 1.2333 | 3.2983 | 0.4833 | 4.7697 | 2.6    | 0.0536 | 1.787  |
| 4/16/2019 0:29 | 0.9    | 1.35   | 2.9845 | 0.5833 | 4.7643 | 2.6    | 0.0448 | 1.7911 |
| 4/16/2019 0:30 | 0.9    | 1.0667 | 3.3657 | 0.4833 | 4.7738 | 2.6    | 0.0515 | 1.7913 |
| 4/16/2019 0:31 | 0.9    | 0.3667 | 3      | 0.8833 | 4.7577 | 2.6    | 0.0588 | 1.8011 |
| 4/16/2019 0:32 | 0.9    | 0.9833 | 3.2412 | 0.5833 | 4.7563 | 2.6    | 0.0384 | 1.8206 |
| 4/16/2019 0:33 | 0.9    | 0.4167 | 3.204  | 0.5833 | 4.7512 | 2.6    | 0.0463 | 1.8087 |
| 4/16/2019 0:34 | 0.9417 | 0.55   | 3.1913 | 0.2167 | 4.7685 | 2.6    | 0.0446 | 1.805  |
| 4/16/2019 0:35 | 0.95   | 0.8833 | 3.0863 | 0.6    | 4.7454 | 2.6    | 0.0461 | 1.8068 |
| 4/16/2019 0:36 | 0.95   | 0.95   | 3.163  | 0.5667 | 4.7053 | 2.6    | 0.0478 | 1.8159 |
| 4/16/2019 0:37 | 1      | 0.3833 | 3.2698 | 0.5333 | 4.7165 | 2.6833 | 0.0403 | 1.8003 |
| 4/16/2019 0:38 | 1      | 0.8167 | 3.0297 | 1.0167 | 4.7075 | 2.675  | 0.0542 | 1.8172 |
| 4/16/2019 0:39 | 1      | 0.8333 | 3.2722 | 0.7    | 4.6937 | 2.7    | 0.0386 | 1.7987 |
| 4/16/2019 0:40 | 0.9917 | 0.4333 | 3.1872 | 0.6    | 4.6718 | 2.6583 | 0.05   | 1.8047 |
| 4/16/2019 0:41 | 0.9833 | 0.5333 | 3.1223 | 0.6333 | 4.67   | 2.6    | 0.0419 | 1.8205 |
| 4/16/2019 0:42 | 0.9333 | 0.5333 | 3.4277 | 0.9167 | 4.6535 | 2.6    | 0.047  | 1.8027 |
| 4/16/2019 0:43 | 1      | 0.4833 | 3.2355 | 0.7833 | 4.6339 | 2.6    | 0.0512 | 1.8011 |
| 4/16/2019 0:44 | 0.9917 | 0.9667 | 3.1652 | 0.6667 | 4.6473 | 2.6636 | 0.0342 | 1.8128 |
| 4/16/2019 0:45 | 1.075  | 0.6    | 3.3635 | 0      | 4.6261 | 2.7    | 0.046  | 1.8186 |
| 4/16/2019 0:46 | 1.0333 | 0.8167 | 2.9415 | 0.8833 | 4.6393 | 2.7    | 0.0551 | 1.8087 |
| 4/16/2019 0:47 | 1.1    | 0.7667 | 3.148  | 0.5667 | 4.6145 | 2.7    | 0.0475 | 1.8273 |
| 4/16/2019 0:48 | 1      | 0.4167 | 2.8368 | 1.2    | 4.615  | 2.7    | 0.0466 | 1.8095 |
| 4/16/2019 0:49 | 1      | 0.6167 | 3.0153 | 0.3333 | 4.6149 | 2.7    | 0.0342 | 1.8198 |
| 4/16/2019 0:50 | 1      | 1.1833 | 3.0083 | 0.1    | 4.6181 | 2.7    | 0.0436 | 1.7963 |
| 4/16/2019 0:51 | 1.0417 | 0.3167 | 2.926  | 0.25   | 4.5909 | 2.7    | 0.0413 | 1.7878 |
| 4/16/2019 0:52 | 1.025  | 0.4167 | 2.9715 | 0.2167 | 4.5742 | 2.7    | 0.039  | 1.8045 |
| 4/16/2019 0:53 | 1.0917 | 0.8167 | 2.9867 | 0.55   | 4.5806 | 2.7    | 0.0494 | 1.8194 |
| 4/16/2019 0:54 | 1.1    | 0.3667 | 3.1222 | 0.1667 | 4.5598 | 2.7917 | 0.039  | 1.8188 |
| 4/16/2019 0:55 | 1.1    | 1.0667 | 3.2513 | 0.4667 | 4.5797 | 2.78   | 0.0453 | 1.8077 |
| 4/16/2019 0:56 | 1.1    | 0.4167 | 2.9267 | 0.45   | 4.553  | 2.7    | 0.0454 | 1.8082 |
| 4/16/2019 0:57 | 1.0083 | 0.5    | 3.2368 | 0.6667 | 4.5323 | 2.7    | 0.0335 | 1.8086 |
| 4/16/2019 0:58 | 0.9833 | 0.6333 | 3.0719 | 0.1667 | 4.5514 | 2.7    | 0.0499 | 1.8058 |
| 4/16/2019 0:59 | 0.9583 | 0.8    | 2.961  | 0.0833 | 4.5754 | 2.7    | 0.0355 | 1.7918 |
| 4/16/2019 1:00 | 0.9917 | 0.0333 | 3.0626 | 0.25   | 4.5631 | 2.6364 | 0.043  | 1.7978 |
| 4/16/2019 1:01 | 1      | 0.4667 | 3.1796 | 0.45   | 4.5756 | 2.6    | 0.0451 | 1.8018 |

|                |        |         |        |         |        |        |        |        |
|----------------|--------|---------|--------|---------|--------|--------|--------|--------|
| 4/16/2019 1:02 | 1      | 0.5167  | 2.8879 | -0.1833 | 4.5721 | 2.6    | 0.031  | 1.8035 |
| 4/16/2019 1:03 | 1      | 0.8     | 2.775  | 0.2833  | 4.5592 | 2.6    | 0.0466 | 1.8214 |
| 4/16/2019 1:04 | 0.9917 | 1.4     | 2.9606 | 0.6167  | 4.5578 | 2.5    | 0.0371 | 1.8153 |
| 4/16/2019 1:05 | 0.9083 | 0.8167  | 2.8331 | 0.2     | 4.555  | 2.5    | 0.0442 | 1.8145 |
| 4/16/2019 1:06 | 0.9    | 0.7333  | 2.8711 | 0.4167  | 4.5243 | 2.5    | 0.0422 | 1.8158 |
| 4/16/2019 1:07 | 0.8583 | 0.3333  | 2.9613 | -0.1    | 4.5466 | 2.5    | 0.0379 | 1.8212 |
| 4/16/2019 1:08 | 0.8909 | 0.3833  | 2.8458 | 1.0333  | 4.545  | 2.5    | 0.0457 | 1.8269 |
| 4/16/2019 1:09 | 0.9333 | 0.2     | 2.8508 | 0.4167  | 4.5672 | 2.5    | 0.0343 | 1.8187 |
| 4/16/2019 1:10 | 0.975  | 0.3333  | 3.2348 | 0.3667  | 4.5442 | 2.4917 | 0.0374 | 1.8352 |
| 4/16/2019 1:11 | 0.9083 | 0.7167  | 3.0234 | 0.4833  | 4.5048 | 2.4727 | 0.0408 | 1.7944 |
| 4/16/2019 1:12 | 0.9917 | 0.5333  | 3.288  | -0.05   | 4.5615 | 2.5    | 0.0377 | 1.8101 |
| 4/16/2019 1:13 | 1      | 0.0667  | 3.0424 | 0.6167  | 4.5522 | 2.5    | 0.0444 | 1.8103 |
| 4/16/2019 1:14 | 1      | 0.5167  | 2.7791 | 0.3167  | 4.5491 | 2.5    | 0.0325 | 1.834  |
| 4/16/2019 1:15 | 1      | 0.8167  | 3.0948 | 0.6833  | 4.5268 | 2.5727 | 0.0426 | 1.8287 |
| 4/16/2019 1:16 | 1      | 1.15    | 3.1926 | -0.0833 | 4.538  | 2.6    | 0.0392 | 1.8321 |
| 4/16/2019 1:17 | 1      | 0.2333  | 3.1357 | 0.5833  | 4.5378 | 2.6    | 0.0381 | 1.8393 |
| 4/16/2019 1:18 | 1      | 0.7     | 3.0711 | 0.3333  | 4.5443 | 2.6    | 0.0475 | 1.8099 |
| 4/16/2019 1:19 | 1.0167 | 0.4667  | 3.2355 | 0.45    | 4.5288 | 2.6    | 0.0351 | 1.8165 |
| 4/16/2019 1:20 | 1.1    | 0.25    | 3.0302 | 0.6667  | 4.5213 | 2.6    | 0.041  | 1.8027 |
| 4/16/2019 1:21 | 1.1    | -0.0167 | 3.1637 | 0.35    | 4.5411 | 2.6    | 0.0352 | 1.8184 |
| 4/16/2019 1:22 | 1.1    | 1.0333  | 3.0683 | 0.75    | 4.5252 | 2.6    | 0.0392 | 1.8136 |
| 4/16/2019 1:23 | 1.1    | 1.3833  | 3.071  | 0.6167  | 4.5263 | 2.6    | 0.0417 | 1.8278 |
| 4/16/2019 1:24 | 1.1083 | 0.7     | 3.0428 | 0.25    | 4.5294 | 2.6    | 0.031  | 1.8561 |
| 4/16/2019 1:25 | 1.1    | 0.4667  | 2.9499 | 0.2167  | 4.5311 | 2.6    | 0.0428 | 1.8515 |
| 4/16/2019 1:26 | 1.1417 | 0.9     | 2.9068 | 0.8     | 4.5494 | 2.6    | 0.0378 | 1.8238 |
| 4/16/2019 1:27 | 1.1    | 0.5333  | 3.0297 | 0.5167  | 4.4994 | 2.6    | 0.0382 | 1.7915 |
| 4/16/2019 1:28 | 1.1167 | 0.25    | 3.0293 | 1.1333  | 4.5127 | 2.5727 | 0.0489 | 1.8073 |
| 4/16/2019 1:29 | 1.1    | 0.5333  | 3.0253 | 1.1     | 4.5284 | 2.5    | 0.0265 | 1.8091 |
| 4/16/2019 1:30 | 1.1    | 0.9667  | 2.9225 | 0.3     | 4.514  | 2.5    | 0.0418 | 1.8133 |
| 4/16/2019 1:31 | 1.1    | 1.1333  | 2.9525 | 0.9     | 4.5094 | 2.5    | 0.0322 | 1.7978 |
| 4/16/2019 1:32 | 1.1    | 1.2     | 3.1124 | 0.5667  | 4.4993 | 2.5    | 0.033  | 1.8101 |
| 4/16/2019 1:33 | 1.1667 | 0.4833  | 2.9602 | 0.55    | 4.4919 | 2.5    | 0.0386 | 1.8258 |
| 4/16/2019 1:34 | 1.2    | 1.3667  | 3.0115 | 0.95    | 4.4696 | 2.46   | 0.0294 | 1.8136 |
| 4/16/2019 1:35 | 1.2    | 1.2     | 2.9843 | 1.2     | 4.4814 | 2.4    | 0.0427 | 1.8103 |
| 4/16/2019 1:36 | 1.2167 | 0.1167  | 3.0014 | 0.75    | 4.4758 | 2.4333 | 0.0306 | 1.8241 |
| 4/16/2019 1:37 | 1.2    | 0.7     | 3.0488 | 1.1667  | 4.4778 | 2.5    | 0.0359 | 1.8441 |
| 4/16/2019 1:38 | 1.1833 | 0.8667  | 2.8748 | 0.45    | 4.4753 | 2.48   | 0.0409 | 1.843  |
| 4/16/2019 1:39 | 1.1    | -0.05   | 2.7282 | 0.9167  | 4.4298 | 2.4    | 0.0291 | 1.8192 |
| 4/16/2019 1:40 | 1.1167 | 0.4167  | 3.0622 | 0.7667  | 4.4408 | 2.4636 | 0.0372 | 1.8373 |
| 4/16/2019 1:41 | 1.2    | 0.75    | 2.8863 | 0.9667  | 4.4429 | 2.5    | 0.03   | 1.8539 |
| 4/16/2019 1:42 | 1.2083 | 0.9667  | 3.3547 | 0.5833  | 4.4472 | 2.5    | 0.0367 | 1.8448 |
| 4/16/2019 1:43 | 1.2083 | 0.3667  | 3.1673 | 0.5167  | 4.4363 | 2.5    | 0.0367 | 1.8007 |
| 4/16/2019 1:44 | 1.2    | 0.1333  | 3.1456 | 0.1833  | 4.4013 | 2.5    | 0.0292 | 1.8231 |
| 4/16/2019 1:45 | 1.1083 | 0.5333  | 3.0998 | 1.05    | 4.3777 | 2.5    | 0.0412 | 1.8546 |
| 4/16/2019 1:46 | 1.1    | 1.3167  | 3.0362 | 0.3833  | 4.3795 | 2.5    | 0.0336 | 1.8782 |
| 4/16/2019 1:47 | 1.1    | 0.4     | 3.0358 | 0.3667  | 4.3738 | 2.54   | 0.0379 | 1.8619 |
| 4/16/2019 1:48 | 1.1    | 0.65    | 3.0457 | 0.4833  | 4.3848 | 2.5    | 0.0427 | 1.8583 |

|                |        |         |        |        |        |        |        |        |
|----------------|--------|---------|--------|--------|--------|--------|--------|--------|
| 4/16/2019 1:49 | 1.1    | 0.6167  | 3.0273 | 0.9    | 4.385  | 2.5364 | 0.0288 | 1.8617 |
| 4/16/2019 1:50 | 1.1083 | 0.75    | 3.1723 | 0.8    | 4.3833 | 2.6    | 0.0385 | 1.8433 |
| 4/16/2019 1:51 | 1.1    | -0.0333 | 3.1938 | 0.65   | 4.349  | 2.6    | 0.0283 | 1.8768 |
| 4/16/2019 1:52 | 1.0167 | 1.2167  | 2.7056 | 0.3333 | 4.3208 | 2.6    | 0.039  | 1.8479 |
| 4/16/2019 1:53 | 1      | 1.0833  | 2.8935 | 0.4    | 4.3354 | 2.5667 | 0.0334 | 1.8508 |
| 4/16/2019 1:54 | 0.9583 | 0.7667  | 3.0028 | 0.4    | 4.3032 | 2.5    | 0.0283 | 1.8613 |
| 4/16/2019 1:55 | 1      | 0.9833  | 3.1986 | 0.8333 | 4.2932 | 2.54   | 0.036  | 1.8489 |
| 4/16/2019 1:56 | 0.9    | 1.2833  | 2.9781 | 0.7    | 4.2768 | 2.6    | 0.0301 | 1.8523 |
| 4/16/2019 1:57 | 0.9833 | 0.8667  | 2.9703 | 0.1667 | 4.2922 | 2.6    | 0.0379 | 1.8292 |
| 4/16/2019 1:58 | 1      | 0.9667  | 3.0375 | 0.6333 | 4.268  | 2.6    | 0.0376 | 1.8384 |
| 4/16/2019 1:59 | 1      | 0.45    | 3.3103 | 0.9333 | 4.2668 | 2.6    | 0.0277 | 1.8526 |
| 4/16/2019 2:00 | 1      | 0.8833  | 3.0058 | 0.7333 | 4.2526 | 2.6364 | 0.0418 | 1.8604 |
| 4/16/2019 2:01 | 1      | 0.3167  | 3.4072 | 0.85   | 4.2582 | 2.6833 | 0.0273 | 1.8703 |
| 4/16/2019 2:02 | 0.9333 | 0.6     | 3.1813 | 0.4167 | 4.2355 | 2.6    | 0.0429 | 1.8758 |
| 4/16/2019 2:03 | 0.9    | 0.8833  | 3.1244 | 0.5333 | 4.2304 | 2.6167 | 0.0344 | 1.8774 |
| 4/16/2019 2:04 | 0.9    | 1.2333  | 2.8722 | 0.7333 | 4.235  | 2.7    | 0.0226 | 1.8735 |
| 4/16/2019 2:05 | 0.9083 | 0.8833  | 3.0826 | 0.3333 | 4.2091 | 2.7    | 0.0398 | 1.8618 |
| 4/16/2019 2:06 | 0.9083 | 0.4333  | 3.0233 | 0.1167 | 4.2025 | 2.7    | 0.027  | 1.8568 |
| 4/16/2019 2:07 | 0.9    | 0.7833  | 3.0798 | 0.7833 | 4.1875 | 2.7    | 0.0247 | 1.8539 |
| 4/16/2019 2:08 | 0.8917 | -0.0167 | 2.9378 | 0.2667 | 4.1528 | 2.7    | 0.0357 | 1.8843 |
| 4/16/2019 2:09 | 0.8917 | 0.85    | 3.0194 | 0.4    | 4.1575 | 2.7    | 0.02   | 1.8597 |
| 4/16/2019 2:10 | 0.9    | 0.2     | 3.0407 | 0.6333 | 4.1236 | 2.7    | 0.0335 | 1.8386 |
| 4/16/2019 2:11 | 0.9    | 0.4667  | 3.1853 | 0.1333 | 4.1472 | 2.7    | 0.0332 | 1.8699 |
| 4/16/2019 2:12 | 0.9083 | 1.2833  | 2.8648 | 0.6333 | 4.1153 | 2.6917 | 0.0353 | 1.9074 |
| 4/16/2019 2:13 | 0.9    | 1.0333  | 2.9484 | 0.3    | 4.0978 | 2.6    | 0.0336 | 1.9048 |
| 4/16/2019 2:14 | 0.9    | 0.6     | 2.9356 | 0.2833 | 4.1108 | 2.6    | 0.0254 | 1.8879 |
| 4/16/2019 2:15 | 0.9    | 0.7333  | 2.9634 | 0.35   | 4.0862 | 2.6    | 0.0422 | 1.8749 |
| 4/16/2019 2:16 | 0.9    | 0.55    | 2.9499 | 0.6    | 4.0689 | 2.6    | 0.0358 | 1.8674 |
| 4/16/2019 2:17 | 0.9    | 0.3     | 2.9181 | 0.3167 | 4.0673 | 2.6    | 0.041  | 1.8916 |
| 4/16/2019 2:18 | 0.8    | 1.1167  | 2.9193 | 0.6167 | 4.0391 | 2.6    | 0.0333 | 1.887  |
| 4/16/2019 2:19 | 0.7667 | 1.2     | 3.0833 | 0.3833 | 4.0449 | 2.5083 | 0.0275 | 1.8786 |
| 4/16/2019 2:20 | 0.7917 | 1.1167  | 3.1042 | 0.7167 | 4.0188 | 2.5    | 0.0357 | 1.8964 |
| 4/16/2019 2:21 | 0.8    | 1.3333  | 3.0603 | 0.4667 | 4.0027 | 2.5    | 0.0263 | 1.8843 |
| 4/16/2019 2:22 | 0.8417 | 0.1833  | 2.5918 | 0.8167 | 3.9844 | 2.5    | 0.0361 | 1.8739 |
| 4/16/2019 2:23 | 0.9    | 0.2667  | 2.8808 | 1.2333 | 3.9791 | 2.5    | 0.0306 | 1.8852 |
| 4/16/2019 2:24 | 0.9    | 0.7667  | 2.9263 | 0.5    | 3.9535 | 2.4091 | 0.0273 | 1.8916 |
| 4/16/2019 2:25 | 0.9    | 0.2     | 2.8845 | 0.8333 | 3.9448 | 2.4    | 0.038  | 1.8757 |
| 4/16/2019 2:26 | 0.9    | 0.7     | 3.1528 | 0.6    | 3.9157 | 2.31   | 0.0272 | 1.8588 |
| 4/16/2019 2:27 | 0.9    | 1.1167  | 3.0355 | 0.4667 | 3.9053 | 2.3    | 0.0339 | 1.8399 |
| 4/16/2019 2:28 | 0.9    | 0.6167  | 2.794  | 0.8833 | 3.9208 | 2.3    | 0.0321 | 1.8451 |
| 4/16/2019 2:29 | 0.9    | 1.05    | 2.7908 | 0.6667 | 3.9023 | 2.3    | 0.0248 | 1.8397 |
| 4/16/2019 2:30 | 0.9    | 0.5333  | 2.9692 | 0.2    | 3.8991 | 2.3    | 0.0331 | 1.8553 |
| 4/16/2019 2:31 | 0.9    | 1.3     | 2.9472 | 0.4667 | 3.8845 | 2.3    | 0.0243 | 1.8863 |
| 4/16/2019 2:32 | 0.9417 | 1.0667  | 3.0818 | 0.8167 | 3.8907 | 2.3    | 0.0292 | 1.8746 |
| 4/16/2019 2:33 | 1.0083 | 0.8833  | 2.997  | 0.6    | 3.8879 | 2.3    | 0.0293 | 1.8524 |
| 4/16/2019 2:34 | 1.05   | 0.5667  | 3.0132 | 0.85   | 3.8839 | 2.375  | 0.0277 | 1.8384 |
| 4/16/2019 2:35 | 1.0083 | 0.25    | 3.216  | 0.6833 | 3.9146 | 2.4    | 0.0392 | 1.8725 |

|                |        |         |        |         |        |        |        |        |
|----------------|--------|---------|--------|---------|--------|--------|--------|--------|
| 4/16/2019 2:36 | 1      | 0.2833  | 3.1867 | 0.8     | 3.9122 | 2.4    | 0.0271 | 1.8708 |
| 4/16/2019 2:37 | 1      | 0.4833  | 3.11   | 0.1667  | 3.9575 | 2.4    | 0.0315 | 1.8548 |
| 4/16/2019 2:38 | 1.0417 | 0.65    | 2.938  | 0.3667  | 3.976  | 2.4    | 0.0317 | 1.8404 |
| 4/16/2019 2:39 | 1.025  | 0.8333  | 2.916  | 1.3833  | 4.0036 | 2.4727 | 0.027  | 1.8327 |
| 4/16/2019 2:40 | 0.9417 | 0.4333  | 2.877  | 0.4     | 4.0408 | 2.5    | 0.0443 | 1.8497 |
| 4/16/2019 2:41 | 0.9    | 0.5167  | 2.8345 | 1.0833  | 4.1218 | 2.5    | 0.0253 | 1.8469 |
| 4/16/2019 2:42 | 0.9417 | 0.2833  | 3.061  | 0.1     | 4.1299 | 2.5    | 0.034  | 1.8478 |
| 4/16/2019 2:43 | 0.9667 | 1.2333  | 3.0678 | 0.2833  | 4.1057 | 2.5    | 0.0219 | 1.846  |
| 4/16/2019 2:44 | 0.9    | -0.4    | 2.6218 | 0.2     | 4.1803 | 2.5    | 0.0325 | 1.8595 |
| 4/16/2019 2:45 | 0.9    | 0.9333  | 2.7612 | 0.3167  | 4.1367 | 2.5    | 0.0373 | 1.8392 |
| 4/16/2019 2:46 | 0.8417 | 0.35    | 2.747  | 0.55    | 4.1803 | 2.5    | 0.0208 | 1.8419 |
| 4/16/2019 2:47 | 0.8    | 0.7833  | 2.5462 | 0.8333  | 4.2373 | 2.4273 | 0.0411 | 1.8581 |
| 4/16/2019 2:48 | 0.8    | 0.35    | 2.8137 | 0.7167  | 4.2293 | 2.5    | 0.0251 | 1.8513 |
| 4/16/2019 2:49 | 0.8    | -0.1333 | 2.7278 | 0.25    | 4.2591 | 2.5    | 0.038  | 1.8433 |
| 4/16/2019 2:50 | 0.8    | 0.1167  | 2.6138 | -0.2333 | 4.279  | 2.5    | 0.0356 | 1.8193 |
| 4/16/2019 2:51 | 0.8    | 0.7667  | 2.6607 | 0.6667  | 4.2798 | 2.5    | 0.0284 | 1.8214 |
| 4/16/2019 2:52 | 0.7917 | 0.2333  | 2.9213 | 0.5167  | 4.2863 | 2.5    | 0.0333 | 1.8345 |
| 4/16/2019 2:53 | 0.7583 | 0.8     | 2.742  | 0.4833  | 4.3329 | 2.5    | 0.0291 | 1.8181 |
| 4/16/2019 2:54 | 0.725  | 0.4167  | 2.5403 | 0.7333  | 4.457  | 2.5    | 0.0327 | 1.8441 |
| 4/16/2019 2:55 | 0.8    | 0.1     | 2.7097 | -0.0167 | 4.4986 | 2.5    | 0.0396 | 1.8504 |
| 4/16/2019 2:56 | 0.8    | 0.3     | 2.9187 | -0.6167 | 4.4782 | 2.5    | 0.0278 | 1.8787 |
| 4/16/2019 2:57 | 0.8    | -0.0833 | 2.5058 | 0.2     | 4.5311 | 2.5    | 0.0331 | 1.8653 |
| 4/16/2019 2:58 | 0.8    | 0.8333  | 2.4997 | 0.1167  | 4.6693 | 2.5    | 0.0245 | 1.8303 |
| 4/16/2019 2:59 | 0.7917 | 0.65    | 2.6555 | -0.2333 | 4.6273 | 2.5    | 0.0349 | 1.8358 |
| 4/16/2019 3:00 | 0.7    | -0.05   | 2.3912 | -0.05   | 4.6356 | 2.4333 | 0.0373 | 1.8381 |
| 4/16/2019 3:01 | 0.7    | -0.05   | 2.6613 | 0.0333  | 4.7878 | 2.4    | 0.0234 | 1.8498 |
| 4/16/2019 3:02 | 0.7    | 0.4667  | 2.5505 | -0.0833 | 4.9213 | 2.4    | 0.0388 | 1.8603 |
| 4/16/2019 3:03 | 0.6917 | 0.3333  | 2.857  | 0.1667  | 4.9043 | 2.4    | 0.0291 | 1.8535 |
| 4/16/2019 3:04 | 0.6    | 0.5167  | 2.4398 | -0.15   | 4.7772 | 2.4    | 0.0311 | 1.8779 |
| 4/16/2019 3:05 | 0.6    | 0.35    | 2.6632 | -0.2667 | 4.8173 | 2.5    | 0.0403 | 1.8438 |
| 4/16/2019 3:06 | 0.6    | 0.3167  | 2.658  | -0.1667 | 4.9377 | 2.475  | 0.0269 | 1.834  |
| 4/16/2019 3:07 | 0.5333 | 0.4     | 2.7147 | 0.1667  | 5.041  | 2.5    | 0.0376 | 1.8484 |
| 4/16/2019 3:08 | 0.5333 | 0.25    | 2.4793 | 0.0667  | 5.1849 | 2.5    | 0.0279 | 1.857  |
| 4/16/2019 3:09 | 0.6    | 0.1167  | 2.4395 | 0.1333  | 5.1837 | 2.5333 | 0.0341 | 1.8248 |
| 4/16/2019 3:10 | 0.5583 | -0.0167 | 2.3713 | 0.6333  | 5.0649 | 2.6    | 0.0386 | 1.8201 |
| 4/16/2019 3:11 | 0.5    | 0.3667  | 2.6378 | 0.0333  | 4.9548 | 2.6    | 0.025  | 1.8478 |
| 4/16/2019 3:12 | 0.5    | 0.0333  | 2.7902 | 0.35    | 5.0703 | 2.6    | 0.0386 | 1.8444 |
| 4/16/2019 3:13 | 0.4083 | -0.2167 | 2.1677 | -0.1333 | 5.1679 | 2.6833 | 0.0271 | 1.836  |
| 4/16/2019 3:14 | 0.4167 | 0.25    | 2.422  | 0.0833  | 5.2074 | 2.7    | 0.0258 | 1.8408 |
| 4/16/2019 3:15 | 0.4667 | 0.3667  | 2.253  | -0.2833 | 5.3067 | 2.7    | 0.0385 | 1.8351 |
| 4/16/2019 3:16 | 0.5    | -0.1167 | 2.3655 | -0.1333 | 5.1535 | 2.7    | 0.0221 | 1.8283 |
| 4/16/2019 3:17 | 0.5    | 0.15    | 2.227  | 0.1833  | 5.1602 | 2.7    | 0.0397 | 1.8312 |
| 4/16/2019 3:18 | 0.5    | 0.1667  | 2.3327 | -0.2167 | 5.1503 | 2.7    | 0.0294 | 1.8428 |
| 4/16/2019 3:19 | 0.5    | -0.1833 | 2.375  | -0.6167 | 5.195  | 2.7    | 0.0287 | 1.8678 |
| 4/16/2019 3:20 | 0.5    | -0.5333 | 2.4408 | -0.2833 | 5.2182 | 2.7    | 0.0322 | 1.8766 |
| 4/16/2019 3:21 | 0.5    | 0.5     | 2.2142 | -0.2    | 5.2568 | 2.7    | 0.0266 | 1.8952 |
| 4/16/2019 3:22 | 0.5    | -0.4    | 2.3965 | -0.6667 | 5.0822 | 2.7    | 0.0423 | 1.8982 |

|                |        |         |        |         |        |        |        |        |
|----------------|--------|---------|--------|---------|--------|--------|--------|--------|
| 4/16/2019 3:23 | 0.5    | 0.0667  | 2.5597 | -0.1    | 5.1645 | 2.7    | 0.0268 | 1.863  |
| 4/16/2019 3:24 | 0.5    | -0.0167 | 2.3597 | -0.5667 | 5.3935 | 2.7    | 0.0357 | 1.8537 |
| 4/16/2019 3:25 | 0.5    | -0.4833 | 2.2107 | -0.1333 | 5.3254 | 2.73   | 0.0322 | 1.856  |
| 4/16/2019 3:26 | 0.5    | -0.5    | 2.5973 | -0.0167 | 5.3581 | 2.7818 | 0.0231 | 1.8321 |
| 4/16/2019 3:27 | 0.5    | 0.2333  | 2.3762 | -0.6333 | 5.2943 | 2.7727 | 0.0369 | 1.8369 |
| 4/16/2019 3:28 | 0.5    | 0.2     | 2.3353 | -0.3333 | 5.3774 | 2.8    | 0.0273 | 1.83   |
| 4/16/2019 3:29 | 0.4667 | 0.55    | 2.5252 | 0.1333  | 5.3385 | 2.8    | 0.0334 | 1.8638 |
| 4/16/2019 3:30 | 0.4    | 0.1667  | 2.4155 | -0.35   | 5.3591 | 2.8    | 0.0397 | 1.8673 |
| 4/16/2019 3:31 | 0.425  | -0.4167 | 2.1588 | -0.4167 | 5.3408 | 2.8    | 0.0264 | 1.8525 |
| 4/16/2019 3:32 | 0.45   | -0.1    | 2.0105 | -0.45   | 5.3834 | 2.7364 | 0.04   | 1.888  |
| 4/16/2019 3:33 | 0.4833 | 0.0833  | 2.5327 | 0.3     | 5.4347 | 2.7667 | 0.0244 | 1.8677 |
| 4/16/2019 3:34 | 0.4667 | -0.1    | 2.3323 | -0.2    | 5.3724 | 2.7545 | 0.037  | 1.8613 |
| 4/16/2019 3:35 | 0.5    | -0.6    | 2.958  | 0.2     | 5.402  | 2.72   | 0.0374 | 1.8526 |
| 4/16/2019 3:36 | 0.5333 | -0.05   | 2.4252 | -0.3667 | 5.3797 | 2.7    | 0.0291 | 1.8593 |
| 4/16/2019 3:37 | 0.5417 | 0.3167  | 2.6645 | -0.3833 | 5.3703 | 2.7583 | 0.0354 | 1.828  |
| 4/16/2019 3:38 | 0.5091 | 0.05    | 2.4503 | -0.45   | 5.2835 | 2.71   | 0.0309 | 1.8268 |
| 4/16/2019 3:39 | 0.5    | -0.3333 | 2.4337 | 0       | 5.3165 | 2.8    | 0.0376 | 1.844  |
| 4/16/2019 3:40 | 0.5    | 0.4833  | 2.508  | 0.3833  | 5.3931 | 2.8    | 0.0337 | 1.8594 |
| 4/16/2019 3:41 | 0.5667 | -0.1667 | 2.2962 | 0.3     | 5.3378 | 2.8    | 0.032  | 1.8828 |
| 4/16/2019 3:42 | 0.6    | 0.0333  | 2.6397 | 0.1667  | 5.2835 | 2.8    | 0.0449 | 1.8741 |
| 4/16/2019 3:43 | 0.6    | 0.3333  | 2.4835 | 0.15    | 5.2749 | 2.8    | 0.0264 | 1.9103 |
| 4/16/2019 3:44 | 0.6    | 0.3667  | 2.5432 | 0.5     | 5.2251 | 2.8    | 0.0379 | 1.8958 |
| 4/16/2019 3:45 | 0.625  | 0       | 2.5357 | 0.7     | 5.2928 | 2.8    | 0.0406 | 1.8676 |
| 4/16/2019 3:46 | 0.7    | 0.1333  | 2.179  | -0.5    | 5.2473 | 2.8    | 0.0286 | 1.8656 |
| 4/16/2019 3:47 | 0.7    | 0.2     | 2.4578 | 0.2833  | 5.2122 | 2.8    | 0.0322 | 1.8418 |
| 4/16/2019 3:48 | 0.7    | -0.1    | 2.6163 | 1.2     | 5.2039 | 2.8    | 0.0243 | 1.8657 |
| 4/16/2019 3:49 | 0.7    | 0.25    | 2.2355 | 0.2833  | 5.1817 | 2.8    | 0.0329 | 1.8782 |
| 4/16/2019 3:50 | 0.6083 | 0.3167  | 2.466  | -0.2833 | 5.1597 | 2.8    | 0.0292 | 1.8839 |
| 4/16/2019 3:51 | 0.6    | 0.4833  | 2.384  | 0.35    | 5.181  | 2.72   | 0.0258 | 1.8633 |
| 4/16/2019 3:52 | 0.6    | 0.8     | 2.4288 | -0.0833 | 5.181  | 2.7    | 0.0424 | 1.8748 |
| 4/16/2019 3:53 | 0.6    | 0.5167  | 2.5465 | 0.7     | 5.1483 | 2.7    | 0.0229 | 1.8768 |
| 4/16/2019 3:54 | 0.6    | 0.2333  | 2.603  | -0.25   | 5.0978 | 2.6909 | 0.0308 | 1.8628 |
| 4/16/2019 3:55 | 0.5833 | 0.7667  | 2.7148 | 0.8     | 5.0696 | 2.6    | 0.0299 | 1.8741 |
| 4/16/2019 3:56 | 0.5    | 1.2833  | 2.6495 | 0.2833  | 5.0218 | 2.6    | 0.028  | 1.8721 |
| 4/16/2019 3:57 | 0.5    | -0.2167 | 2.6593 | 0.3333  | 5.0059 | 2.5917 | 0.0393 | 1.8905 |
| 4/16/2019 3:58 | 0.5    | -0.1667 | 2.7798 | 0.4833  | 5.0043 | 2.5    | 0.0236 | 1.8559 |
| 4/16/2019 3:59 | 0.5    | 0.3667  | 2.3757 | -0.1667 | 5.0058 | 2.56   | 0.0333 | 1.8533 |
| 4/16/2019 4:00 | 0.5    | 0.6333  | 2.6461 | 0.2833  | 4.9639 | 2.5727 | 0.0346 | 1.8663 |
| 4/16/2019 4:01 | 0.5583 | 0.4667  | 2.6125 | 0.3333  | 4.9575 | 2.5545 | 0.025  | 1.8871 |
| 4/16/2019 4:02 | 0.5083 | 0.3667  | 2.5558 | 0.3833  | 4.9196 | 2.6    | 0.0371 | 1.8967 |
| 4/16/2019 4:03 | 0.5    | 0.3667  | 2.3565 | 0.0167  | 4.8814 | 2.6    | 0.022  | 1.8463 |
| 4/16/2019 4:04 | 0.4917 | 0.8667  | 2.5088 | 0.75    | 4.837  | 2.6    | 0.03   | 1.8867 |
| 4/16/2019 4:05 | 0.5    | 0.8333  | 2.6707 | 0.7333  | 4.8305 | 2.6    | 0.0333 | 1.8648 |
| 4/16/2019 4:06 | 0.5    | 0.95    | 2.7444 | 0.4333  | 4.8108 | 2.6    | 0.0237 | 1.8758 |
| 4/16/2019 4:07 | 0.5    | -0.4667 | 2.3863 | 0.5833  | 4.793  | 2.6    | 0.0314 | 1.8691 |
| 4/16/2019 4:08 | 0.5    | 0.4833  | 2.8592 | 0.35    | 4.775  | 2.68   | 0.0239 | 1.9104 |
| 4/16/2019 4:09 | 0.5    | 0.6667  | 2.2726 | 0.25    | 4.7788 | 2.7    | 0.0265 | 1.8955 |

|                |        |        |        |         |        |        |        |        |
|----------------|--------|--------|--------|---------|--------|--------|--------|--------|
| 4/16/2019 4:10 | 0.5833 | 0.0167 | 2.4901 | 0.2667  | 4.75   | 2.7    | 0.0385 | 1.8505 |
| 4/16/2019 4:11 | 0.6    | 0.5333 | 2.3768 | 0.3167  | 4.7568 | 2.7    | 0.0246 | 1.8548 |
| 4/16/2019 4:12 | 0.6917 | 0.35   | 2.4849 | -0.1    | 4.7174 | 2.7    | 0.0371 | 1.871  |
| 4/16/2019 4:13 | 0.8    | 0.3    | 2.6818 | 0.1833  | 4.6684 | 2.7364 | 0.0311 | 1.8893 |
| 4/16/2019 4:14 | 0.8667 | 0.3333 | 2.7974 | 0.5167  | 4.6168 | 2.7818 | 0.0272 | 1.8745 |
| 4/16/2019 4:15 | 0.9    | 0.6667 | 2.6761 | 0.6667  | 4.5677 | 2.7    | 0.0305 | 1.864  |
| 4/16/2019 4:16 | 0.8    | 0.4667 | 2.6963 | 0.2833  | 4.5948 | 2.7    | 0.0165 | 1.8753 |
| 4/16/2019 4:17 | 0.8    | 0.15   | 2.755  | 0.1667  | 4.5655 | 2.7    | 0.0342 | 1.8703 |
| 4/16/2019 4:18 | 0.8    | 0.0333 | 2.7753 | 0.0333  | 4.5148 | 2.7    | 0.0213 | 1.8777 |
| 4/16/2019 4:19 | 0.8    | 0.2333 | 2.707  | 0.25    | 4.5289 | 2.7    | 0.0275 | 1.8793 |
| 4/16/2019 4:20 | 0.8083 | 0.3333 | 2.7759 | 0.1333  | 4.5236 | 2.6636 | 0.0229 | 1.8691 |
| 4/16/2019 4:21 | 0.8917 | 1.0333 | 2.8702 | 0.0833  | 4.4724 | 2.6417 | 0.0225 | 1.8805 |
| 4/16/2019 4:22 | 0.9167 | 0.75   | 3.1765 | 0.7167  | 4.4463 | 2.7    | 0.034  | 1.8753 |
| 4/16/2019 4:23 | 0.9417 | 0.6333 | 2.9064 | 0.3     | 4.4283 | 2.7    | 0.0201 | 1.8793 |
| 4/16/2019 4:24 | 0.9    | 0.4333 | 2.9518 | 0.35    | 4.3893 | 2.7    | 0.0286 | 1.8627 |
| 4/16/2019 4:25 | 0.9167 | 0.5    | 2.799  | 0.6167  | 4.3817 | 2.7    | 0.0283 | 1.8703 |
| 4/16/2019 4:26 | 0.9    | 0.1333 | 2.6626 | 0.6333  | 4.3709 | 2.66   | 0.0163 | 1.8496 |
| 4/16/2019 4:27 | 0.9    | 0.6167 | 2.8013 | 0.4333  | 4.372  | 2.7    | 0.0325 | 1.8307 |
| 4/16/2019 4:28 | 0.9    | 0.3333 | 2.9223 | 0.8     | 4.3171 | 2.7    | 0.0269 | 1.8263 |
| 4/16/2019 4:29 | 0.9667 | 1.0333 | 2.9517 | 0.5833  | 4.2818 | 2.7    | 0.0306 | 1.8391 |
| 4/16/2019 4:30 | 1      | 0.3    | 2.5958 | 0.2167  | 4.3043 | 2.7    | 0.0268 | 1.902  |
| 4/16/2019 4:31 | 1      | 0      | 2.7449 | 0.6     | 4.293  | 2.7    | 0.0222 | 1.8903 |
| 4/16/2019 4:32 | 1      | 1.2333 | 2.9541 | 0.6333  | 4.2544 | 2.7    | 0.0314 | 1.8892 |
| 4/16/2019 4:33 | 1      | 0.8833 | 2.8605 | 0.5667  | 4.2166 | 2.7545 | 0.0205 | 1.8884 |
| 4/16/2019 4:34 | 1      | -0.05  | 2.6534 | 0.25    | 4.1857 | 2.7182 | 0.0251 | 1.9059 |
| 4/16/2019 4:35 | 1.0917 | 0.2667 | 2.9434 | 0.2     | 4.1914 | 2.7    | 0.0283 | 1.8749 |
| 4/16/2019 4:36 | 1.0333 | 0.0333 | 2.6478 | 0.3833  | 4.2069 | 2.7778 | 0.0164 | 1.8687 |
| 4/16/2019 4:37 | 1      | 1.0333 | 2.6708 | 0.4333  | 4.1688 | 2.8    | 0.0339 | 1.8838 |
| 4/16/2019 4:38 | 0.925  | 0.85   | 2.7869 | 0.5     | 4.1529 | 2.8    | 0.0221 | 1.8673 |
| 4/16/2019 4:39 | 0.9917 | 0.9667 | 2.6978 | 0.1     | 4.1118 | 2.8    | 0.0288 | 1.8436 |
| 4/16/2019 4:40 | 0.9583 | 0.65   | 2.6703 | -0.0167 | 4.1133 | 2.78   | 0.0216 | 1.8588 |
| 4/16/2019 4:41 | 0.9    | 0.1    | 2.4795 | -0.0167 | 4.1148 | 2.8    | 0.025  | 1.8519 |
| 4/16/2019 4:42 | 0.9417 | 0.3167 | 2.7517 | -0.3    | 4.0813 | 2.8    | 0.0326 | 1.8532 |
| 4/16/2019 4:43 | 1      | 0.5167 | 2.8153 | 0.1     | 4.078  | 2.8    | 0.0181 | 1.8843 |
| 4/16/2019 4:44 | 1      | 0.75   | 2.6625 | 0.4667  | 4.0698 | 2.8    | 0.0328 | 1.8945 |
| 4/16/2019 4:45 | 1      | 0.5167 | 2.7369 | -0.0667 | 4.0626 | 2.8    | 0.0284 | 1.8972 |
| 4/16/2019 4:46 | 0.975  | 0.8333 | 2.7545 | 0.05    | 4.0679 | 2.8    | 0.0238 | 1.8644 |
| 4/16/2019 4:47 | 1      | 0.3333 | 2.9475 | 0.6833  | 4.0671 | 2.8    | 0.0317 | 1.8758 |
| 4/16/2019 4:48 | 1      | 0.2833 | 2.7091 | 0.15    | 4.0509 | 2.7182 | 0.0159 | 1.8634 |
| 4/16/2019 4:49 | 0.9917 | 0.8333 | 2.7912 | 0.7     | 4.0434 | 2.7    | 0.0271 | 1.8438 |
| 4/16/2019 4:50 | 0.9    | 0.0167 | 2.7627 | 0.3     | 4.0598 | 2.7    | 0.0267 | 1.8601 |
| 4/16/2019 4:51 | 0.9    | 0.4167 | 2.5773 | -0.1167 | 4.0635 | 2.7    | 0.023  | 1.8899 |
| 4/16/2019 4:52 | 0.8583 | 0.6167 | 2.6876 | 0.7667  | 4.066  | 2.7    | 0.0299 | 1.8688 |
| 4/16/2019 4:53 | 0.9    | 0.4167 | 2.5753 | 0.4167  | 4.066  | 2.75   | 0.0211 | 1.8601 |
| 4/16/2019 4:54 | 0.9    | 0.6833 | 2.2093 | 0.4667  | 4.0671 | 2.8    | 0.0323 | 1.8853 |
| 4/16/2019 4:55 | 0.8583 | 0.4167 | 2.833  | 0.75    | 4.0514 | 2.8    | 0.0232 | 1.8728 |
| 4/16/2019 4:56 | 0.8    | 0.1833 | 2.7158 | 0.3167  | 4.0735 | 2.83   | 0.0225 | 1.886  |

|                |        |         |        |         |        |        |         |        |
|----------------|--------|---------|--------|---------|--------|--------|---------|--------|
| 4/16/2019 4:57 | 0.8    | 0.6333  | 2.5387 | 0.75    | 4.0603 | 2.9    | 0.0317  | 1.9008 |
| 4/16/2019 4:58 | 0.7583 | 0.3333  | 2.7653 | 0.4667  | 4.0611 | 2.9    | 0.0182  | 1.9048 |
| 4/16/2019 4:59 | 0.7    | 1.25    | 2.7003 | 0.9333  | 4.1192 | 2.9    | 0.0294  | 1.9134 |
| 4/16/2019 5:00 | 0.7    | 0.1     | 2.6816 | 0.2167  | 4.0998 | 2.9    | 0.0221  | 1.9042 |
| 4/16/2019 5:01 | 0.7    | 0.1333  | 2.7744 | 0.25    | 4.0994 | 2.9    | 0.023   | 1.8823 |
| 4/16/2019 5:02 | 0.7    | 0.7     | 2.6787 | 0.6333  | 4.1094 | 2.9    | 0.0241  | 1.8633 |
| 4/16/2019 5:03 | 0.7    | 0.2     | 2.6633 | 0.5333  | 4.1462 | 2.9    | 0.0168  | 1.886  |
| 4/16/2019 5:04 | 0.675  | 0.0333  | 2.4618 | 0.95    | 4.1303 | 2.9    | 0.0194  | 1.876  |
| 4/16/2019 5:05 | 0.6    | 0.2667  | 2.6931 | 0.4     | 4.1401 | 2.9    | 0.023   | 1.8475 |
| 4/16/2019 5:06 | 0.6    | 0.2333  | 2.4718 | -0.05   | 4.1492 | 2.8636 | 0.0061  | 1.8673 |
| 4/16/2019 5:07 | 0.6417 | 0.4167  | 2.7154 | 0.9167  | 4.2118 | 2.8    | 0.0239  | 1.8669 |
| 4/16/2019 5:08 | 0.7    | 0.65    | 2.5723 | 0.0833  | 4.247  | 2.8    | 0.0125  | 1.8396 |
| 4/16/2019 5:09 | 0.65   | 0.1667  | 2.5081 | 0.4     | 4.229  | 2.8    | 0.0068  | 1.8471 |
| 4/16/2019 5:10 | 0.6    | 0.4     | 2.5536 | 0.3167  | 4.1976 | 2.8    | 0.0125  | 1.8793 |
| 4/16/2019 5:11 | 0.6    | 0.45    | 2.5763 | 0.4833  | 4.236  | 2.7833 | 0.0057  | 1.8348 |
| 4/16/2019 5:12 | 0.7    | 0.25    | 2.2355 | 0.5167  | 4.3059 | 2.7    | 0.0104  | 1.8404 |
| 4/16/2019 5:13 | 0.7    | 0.7833  | 2.5837 | 0.05    | 4.2338 | 2.7    | 0.013   | 1.8454 |
| 4/16/2019 5:14 | 0.7    | 0.7     | 2.4343 | 0.0833  | 4.2485 | 2.72   | 0.0008  | 1.8254 |
| 4/16/2019 5:15 | 0.6917 | 0.0667  | 2.6639 | -0.3167 | 4.3025 | 2.8    | 0.0177  | 1.8259 |
| 4/16/2019 5:16 | 0.6917 | 0.1333  | 2.6307 | 0.5667  | 4.2776 | 2.8    | -0.0039 | 1.8337 |
| 4/16/2019 5:17 | 0.6417 | 0.2833  | 2.6509 | 0.55    | 4.2698 | 2.7182 | 0.0096  | 1.8151 |
| 4/16/2019 5:18 | 0.625  | 0.4167  | 2.5966 | 0.1     | 4.3103 | 2.7    | 0.0049  | 1.794  |
| 4/16/2019 5:19 | 0.6    | -0.0167 | 2.7354 | 0.3667  | 4.3167 | 2.7    | -0.0014 | 1.8134 |
| 4/16/2019 5:20 | 0.6917 | 0.6833  | 2.6433 | 0.2333  | 4.4373 | 2.7    | 0.0115  | 1.8472 |
| 4/16/2019 5:21 | 0.6083 | -0.5167 | 2.7218 | 0.0667  | 4.3839 | 2.7    | 0.0019  | 1.8408 |
| 4/16/2019 5:22 | 0.625  | -0.45   | 2.4301 | 0.2     | 4.3102 | 2.7    | -0.0003 | 1.822  |
| 4/16/2019 5:23 | 0.6    | 0.0333  | 2.1844 | -0.1167 | 4.4684 | 2.7    | 0.008   | 1.7987 |
| 4/16/2019 5:24 | 0.6    | -0.25   | 2.6567 | -0.0333 | 4.4695 | 2.7    | -0.0032 | 1.7887 |
| 4/16/2019 5:25 | 0.6    | 0.1333  | 2.5323 | 0.3167  | 4.3508 | 2.7    | 0.0019  | 1.8077 |
| 4/16/2019 5:26 | 0.6    | -0.5    | 2.5443 | 0.45    | 4.3492 | 2.7    | 0.0063  | 1.8424 |
| 4/16/2019 5:27 | 0.5917 | -0.2667 | 2.5098 | 0       | 4.4857 | 2.6182 | -0.0059 | 1.8337 |
| 4/16/2019 5:28 | 0.6    | 0.5     | 2.8092 | 0.0167  | 4.5084 | 2.7    | 0.0033  | 1.805  |
| 4/16/2019 5:29 | 0.6    | 0.05    | 2.8288 | 0.1833  | 4.5403 | 2.7    | -0.0051 | 1.8071 |
| 4/16/2019 5:30 | 0.6    | 0.4     | 2.811  | 0.5667  | 4.6338 | 2.7    | 0.0029  | 1.8048 |
| 4/16/2019 5:31 | 0.6    | -0.4333 | 2.6698 | -0.05   | 4.6959 | 2.7    | 0.0107  | 1.8101 |
| 4/16/2019 5:32 | 0.6    | 0.15    | 2.6145 | 0.4333  | 4.701  | 2.7    | -0.0045 | 1.8053 |
| 4/16/2019 5:33 | 0.6    | 0.4667  | 2.3485 | 0.25    | 4.6316 | 2.7    | 0.0125  | 1.82   |
| 4/16/2019 5:34 | 0.6    | 0.3333  | 2.2063 | 0.0167  | 4.6708 | 2.7    | 0.0114  | 1.839  |
| 4/16/2019 5:35 | 0.5333 | 0.2333  | 2.3757 | -0.1667 | 4.5724 | 2.72   | 0.0046  | 1.8543 |
| 4/16/2019 5:36 | 0.5083 | -0.1    | 2.4258 | -0.1    | 4.6723 | 2.8    | 0.0059  | 1.8307 |
| 4/16/2019 5:37 | 0.6    | 0.3     | 2.4023 | -0.35   | 4.709  | 2.8    | 0.0101  | 1.8235 |
| 4/16/2019 5:38 | 0.6    | 0.2167  | 2.4598 | -0.2167 | 4.6396 | 2.8    | 0       | 1.8463 |
| 4/16/2019 5:39 | 0.6    | 0.5333  | 2.825  | -0.05   | 4.7778 | 2.8    | 0.0155  | 1.8454 |
| 4/16/2019 5:40 | 0.6167 | 0.15    | 2.9223 | 0.5     | 4.8163 | 2.8    | 0.0046  | 1.8348 |
| 4/16/2019 5:41 | 0.675  | 0.9167  | 2.5687 | -0.3    | 4.6031 | 2.8    | 0.0148  | 1.8599 |
| 4/16/2019 5:42 | 0.7    | -0.15   | 2.6153 | -0.25   | 4.7969 | 2.8    | 0.0197  | 1.8147 |
| 4/16/2019 5:43 | 0.7    | 0.6     | 2.3948 | 0.4167  | 4.7221 | 2.8545 | 0.0062  | 1.8217 |



|                |        |         |        |         |        |        |        |        |
|----------------|--------|---------|--------|---------|--------|--------|--------|--------|
| 4/16/2019 5:44 | 0.7    | -0.3333 | 2.5008 | 0.1167  | 4.731  | 2.9    | 0.0221 | 1.8067 |
| 4/16/2019 5:45 | 0.7    | -0.4    | 2.6272 | -0.2833 | 4.7959 | 2.9    | 0.0127 | 1.789  |
| 4/16/2019 5:46 | 0.7    | -0.35   | 2.4268 | 0.55    | 4.7826 | 2.9    | 0.0126 | 1.8108 |
| 4/16/2019 5:47 | 0.625  | -0.2667 | 2.2885 | 0.2167  | 4.7043 | 2.9    | 0.0211 | 1.8328 |
| 4/16/2019 5:48 | 0.6    | 0.4667  | 2.4858 | 0.1333  | 4.7794 | 2.8091 | 0.0116 | 1.8303 |
| 4/16/2019 5:49 | 0.6    | 0.5167  | 2.4717 | 0.2667  | 4.7735 | 2.8    | 0.026  | 1.8226 |
| 4/16/2019 5:50 | 0.6    | 0.4667  | 2.4308 | 0       | 4.7213 | 2.8    | 0.02   | 1.8267 |
| 4/16/2019 5:51 | 0.5833 | -0.7833 | 2.6685 | -0.0667 | 4.6641 | 2.8    | 0.0163 | 1.8586 |
| 4/16/2019 5:52 | 0.5917 | 0.15    | 2.8153 | 0.1167  | 4.7063 | 2.8    | 0.0311 | 1.8767 |
| 4/16/2019 5:53 | 0.6    | 0.3167  | 2.7763 | -0.25   | 4.7523 | 2.84   | 0.0206 | 1.869  |
| 4/16/2019 5:54 | 0.6    | 0.8167  | 2.2668 | -0.0333 | 4.752  | 2.88   | 0.0299 | 1.865  |
| 4/16/2019 5:55 | 0.6    | 0.5833  | 2.5245 | -0.3    | 4.7458 | 2.8    | 0.0258 | 1.8483 |
| 4/16/2019 5:56 | 0.6    | 0       | 2.5923 | -0.8167 | 4.7513 | 2.8    | 0.0201 | 1.8459 |
| 4/16/2019 5:57 | 0.6    | 1.05    | 2.4077 | -0.4167 | 4.7698 | 2.8    | 0.0281 | 1.8642 |
| 4/16/2019 5:58 | 0.6    | -0.0833 | 2.5788 | 0.2833  | 4.721  | 2.8    | 0.0213 | 1.8668 |
| 4/16/2019 5:59 | 0.6    | 0.4333  | 2.2298 | -0.1167 | 4.7758 | 2.8    | 0.031  | 1.8688 |
| 4/16/2019 6:00 | 0.5583 | 0.35    | 2.3238 | -0.6    | 4.7703 | 2.8091 | 0.0269 | 1.886  |
| 4/16/2019 6:01 | 0.525  | 0.3167  | 2.1825 | 0.0333  | 4.7752 | 2.9    | 0.0196 | 1.8765 |
| 4/16/2019 6:02 | 0.6    | 0.3167  | 2.5993 | -0.2333 | 4.7839 | 2.84   | 0.0373 | 1.8556 |
| 4/16/2019 6:03 | 0.5    | 0.35    | 2.3815 | -0.3833 | 4.6969 | 2.8333 | 0.0199 | 1.8788 |
| 4/16/2019 6:04 | 0.5    | 0.4     | 2.1512 | -0.05   | 4.7282 | 2.8    | 0.0299 | 1.8902 |
| 4/16/2019 6:05 | 0.5    | -0.25   | 2.1675 | 0.1833  | 4.7361 | 2.8    | 0.0325 | 1.8655 |
| 4/16/2019 6:06 | 0.5    | 0.1667  | 2.4467 | -0.25   | 4.7271 | 2.8    | 0.0214 | 1.8995 |
| 4/16/2019 6:07 | 0.5    | 1.2167  | 2.3687 | -0.4667 | 4.749  | 2.8    | 0.0339 | 1.9122 |
| 4/16/2019 6:08 | 0.525  | 0.2     | 2.1695 | -0.2333 | 4.7233 | 2.7545 | 0.0182 | 1.9133 |
| 4/16/2019 6:09 | 0.5833 | -0.2333 | 1.6011 | -0.8333 | 4.7164 | 2.7    | 0.0306 | 1.9001 |
| 4/16/2019 6:10 | 0.5833 | 0.0333  | 2.7618 | -0.3    | 4.7052 | 2.7    | 0.03   | 1.8903 |
| 4/16/2019 6:11 | 0.5333 | -0.2667 | 2.6367 | -0.2167 | 4.6724 | 2.7    | 0.0154 | 1.9047 |
| 4/16/2019 6:12 | 0.5    | 0.7     | 2.4338 | -0.0167 | 4.7658 | 2.7    | 0.0349 | 1.8772 |
| 4/16/2019 6:13 | 0.5    | -0.3333 | 2.7842 | -0.0667 | 4.7352 | 2.6545 | 0.0256 | 1.8732 |
| 4/16/2019 6:14 | 0.5    | 0.8667  | 2.5032 | 0.05    | 4.7487 | 2.6    | 0.0305 | 1.8764 |
| 4/16/2019 6:15 | 0.5    | 1.3167  | 2.4682 | -0.1833 | 4.7494 | 2.6    | 0.0326 | 1.8553 |
| 4/16/2019 6:16 | 0.5333 | 0.2167  | 2.6803 | 0.3333  | 4.7348 | 2.6    | 0.021  | 1.8909 |
| 4/16/2019 6:17 | 0.55   | 0.2     | 2.639  | 0.1667  | 4.7493 | 2.69   | 0.033  | 1.9189 |
| 4/16/2019 6:18 | 0.6    | -0.0833 | 2.679  | 0.1833  | 4.7089 | 2.7    | 0.0242 | 2.0195 |
| 4/16/2019 6:19 | 0.6    | 0.1667  | 2.5055 | 0.15    | 4.7065 | 2.7    | 0.0346 | 2.2355 |
| 4/16/2019 6:20 | 0.6    | 0.0167  | 2.7955 | 0.0833  | 4.6935 | 2.7636 | 0.0283 | 2.2263 |
| 4/16/2019 6:21 | 0.6    | 0.7333  | 2.4265 | 0.2667  | 4.7372 | 2.8    | 0.0226 | 2.2253 |
| 4/16/2019 6:22 | 0.6833 | 0.0833  | 2.5797 | 0.05    | 4.7208 | 2.8778 | 0.0312 | 2.1783 |
| 4/16/2019 6:23 | 0.6    | 0.3833  | 2.4502 | 0.05    | 4.6758 | 2.9    | 0.0292 | 2.1743 |
| 4/16/2019 6:24 | 0.6    | -0.0833 | 2.8422 | -0.3333 | 4.6511 | 2.9    | 0.0204 | 2.2118 |
| 4/16/2019 6:25 | 0.5083 | -0.2333 | 2.6025 | -0.25   | 4.6367 | 2.9    | 0.0313 | 2.2415 |
| 4/16/2019 6:26 | 0.5    | 0.45    | 2.6107 | -0.2833 | 4.6423 | 2.9545 | 0.0225 | 2.2064 |
| 4/16/2019 6:27 | 0.5    | 0.2     | 2.3767 | -0.35   | 4.5976 | 3      | 0.0253 | 2.2246 |
| 4/16/2019 6:28 | 0.5083 | 0.6167  | 2.132  | 0.3     | 4.5869 | 2.9545 | 0.0326 | 2.2183 |
| 4/16/2019 6:29 | 0.55   | 0.25    | 2.6448 | 0.1333  | 4.633  | 2.9    | 0.0161 | 2.2173 |
| 4/16/2019 6:30 | 0.5833 | 0.0333  | 2.6288 | 0.4667  | 4.6381 | 2.9    | 0.0323 | 2.1806 |

|                |         |         |         |         |         |         |        |        |
|----------------|---------|---------|---------|---------|---------|---------|--------|--------|
| 4/16/2019 6:31 | 0.5833  | 0.2     | 2.414   | -0.3167 | 4.5782  | 2.9     | 0.0209 | 2.2142 |
| 4/16/2019 6:32 | 0.5917  | 0.1167  | 2.2775  | 0.1833  | 4.5928  | 2.9     | 0.0291 | 2.1967 |
| 4/16/2019 6:33 | 0.5667  | 0.4667  | 2.311   | 0.8167  | 4.5818  | 2.9     | 0.0303 | 2.1813 |
| 4/16/2019 6:34 | 0.55    | 0.55    | 0.9554  | -0.1833 | 4.5781  | 2.8818  | 0.0224 | 2.1796 |
| 4/16/2019 6:35 | 0.5     | 0.0333  | 2.2888  | 0.2667  | 4.6188  | 2.8     | 0.0317 | 2.171  |
| 4/16/2019 6:36 | 0.5     | 0.4167  | 2.2687  | 0       | 4.5857  | 2.8     | 0.0216 | 2.1817 |
| 4/16/2019 6:37 | 0.5083  | 0.0333  | 2.6505  | -0.1167 | 4.6124  | 2.8     | 0.0324 | 2.1623 |
| 4/16/2019 6:38 | 0.6     | 0.1167  | 2.331   | 0.4167  | 4.599   | 2.8     | 0.0315 | 2.1608 |
| 4/16/2019 6:39 | 0.5667  | 0.15    | 2.304   | 0.8333  | 4.6196  | 2.8     | 0.0218 | 2.1432 |
| 4/16/2019 6:40 | 0.5     | 0.55    | 2.2725  | -0.1833 | 4.5894  | 2.7636  | 0.0301 | 2.1422 |
| 4/16/2019 6:41 | 0.5     | -0.1167 | 2.5657  | 0.55    | 4.5761  | 2.8     | 0.0145 | 2.1477 |
| 4/16/2019 6:42 | 0.5167  | -0.1333 | 2.8195  | 0.0833  | 4.6539  | 2.8     | 0.0196 | 2.1205 |
| 4/16/2019 6:43 | 0.5     | 0.15    | 2.5835  | -0.0833 | 4.5883  | 2.77    | 0.0224 | 2.1424 |
| 4/16/2019 6:44 | 0.5     | 0.2667  | 2.6025  | 0.6     | 4.5479  | 2.7727  | 0.0186 | 2.1683 |
| 4/16/2019 6:45 | 0.5     | 0.1833  | 2.582   | 0.0333  | 4.5988  | 2.8     | 0.0253 | 2.1481 |
| 4/16/2019 6:46 | 0.5     | -0.1333 | 2.6155  | 0.0833  | 4.6249  | 2.8     | 0.0204 | 2.094  |
| 4/16/2019 6:47 | 0.55    | -0.1    | 2.7485  | -0.2667 | 4.6448  | 2.8     | 0.0196 | 2.1013 |
| 4/16/2019 6:48 | 0.575   | 0.5167  | 2.7507  | 0.3333  | 4.6647  | 2.8     | 0.0266 | 2.1155 |
| 4/16/2019 6:49 | 0.4818  | 0.6167  | 2.4717  | 0.0667  | 4.6085  | 2.8417  | 0.0127 | 2.1552 |
| 4/16/2019 6:50 | 0.4     | 0       | 2.5008  | 0.1667  | 4.6189  | 2.9     | 0.0277 | 2.1448 |
| 4/16/2019 6:51 | 0.4     | 0.4667  | 2.5243  | 0.3833  | 4.6963  | 2.9     | 0.0238 | 2.1328 |
| 4/16/2019 6:52 | 0.4     | 0.2333  | 2.41    | 0.2833  | 4.7302  | 2.9     | 0.0126 | 2.1469 |
| 4/16/2019 6:53 | 0.4     | 0.0833  | 2.4708  | -0.0667 | 4.7618  | 2.9     | 0.032  | 2.1666 |
| 4/16/2019 6:54 | 0.4     | 0.5833  | 2.5935  | 0       | 4.7318  | 2.9     | 0.0128 | 2.1803 |
| 4/16/2019 6:55 | 0.4     | -0.1833 | 2.2952  | 0.4667  | 4.729   | 2.9     | 0.0238 | 2.191  |
| 4/16/2019 6:56 | 0.4083  | 0.0167  | 1.4176  | 0.6167  | 4.7631  | 2.9     | 0.0204 | 2.1691 |
| 4/16/2019 6:57 | 0.4917  | 0.0167  | 2.4725  | -0.0833 | 4.8728  | 2.9     | 0.0171 | 2.1747 |
| 4/16/2019 6:58 | 0.4917  | 0.15    | 2.5048  | 0.0333  | 4.8691  | 2.9     | 0.0243 | 2.1548 |
| 4/16/2019 6:59 | 0.4833  | 0.3167  | 2.0462  | -0.4167 | 4.8453  | 2.9364  | 0.0138 | 2.1896 |
| 4/16/2019 7:00 | 0.4     | -0.4333 | 2.4473  | 0.3167  | 4.8536  | 3       | 0.0232 | 2.2159 |
| 4/16/2019 7:01 | 0.4     | 0       | 3.6408  | 0.2667  | 6.0911  | 3.0273  | 0.0558 | 2.2124 |
| 4/16/2019 7:02 | 0.3417  | -0.1833 | 7.7654  | -0.4833 | 11.2048 | 3.9909  | 0.1458 | 2.2507 |
| 4/16/2019 7:03 | 0.3     | 0.0833  | 62.1383 | 2.1833  | 23.1506 | 22.53   | 2.0544 | 2.5108 |
| 4/16/2019 7:04 | 0.1583  | -0.3333 | 77.6592 | 0.9667  | 25.5948 | 60.1    | 2.9442 | 2.7388 |
| 4/16/2019 7:05 | 0.05    | -0.05   | 58.8192 | 0.9     | 22.2955 | 52.8182 | 2.8778 | 2.6251 |
| 4/16/2019 7:06 | -0.0167 | -0.6667 | 54.5658 | 0.6333  | 21.1675 | 51.2833 | 2.8921 | 2.6197 |
| 4/16/2019 7:07 | 0       | -0.15   | 52.1917 | 0.55    | 20.3511 | 50.9909 | 2.93   | 2.6183 |
| 4/16/2019 7:08 | 0       | -0.55   | 46.7175 | 0.2667  | 19.2968 | 46.1818 | 2.6719 | 2.589  |
| 4/16/2019 7:09 | 0.0833  | -1      | 45.63   | -0.2    | 19.3596 | 47.3909 | 2.5348 | 2.5678 |
| 4/16/2019 7:10 | 0.0667  | -0.3333 | 42.2433 | -0.2667 | 18.7288 | 41.8167 | 1.9468 | 2.5212 |
| 4/16/2019 7:11 | 0.1     | -0.5167 | 41.0733 | 0.0667  | 18.7808 | 42.3636 | 1.8758 | 2.5207 |
| 4/16/2019 7:12 | 0.15    | 0.4167  | 43.95   | -0.15   | 19.3065 | 42.8727 | 1.821  | 2.5545 |
| 4/16/2019 7:13 | 0.2     | -0.3833 | 43.2892 | 0.4     | 19.3529 | 43.8909 | 1.7957 | 2.5862 |
| 4/16/2019 7:14 | 0.2     | -0.8667 | 41.9267 | -0.2833 | 19.0685 | 42.9818 | 1.7564 | 2.5964 |
| 4/16/2019 7:15 | 0.2     | -0.4667 | 40.7433 | 0.3833  | 18.6704 | 42.1455 | 1.7053 | 2.5568 |
| 4/16/2019 7:16 | 0.1917  | -0.4833 | 38.3792 | 0.0667  | 18.375  | 42.1091 | 1.6733 | 2.544  |
| 4/16/2019 7:17 | 0.2     | -0.2    | 37.6533 | -0.15   | 17.9915 | 42.05   | 1.6303 | 2.531  |

|                |        |         |         |          |         |         |        |        |
|----------------|--------|---------|---------|----------|---------|---------|--------|--------|
| 4/16/2019 7:18 | 0.1417 | 0.1833  | 34.9183 | 0.3833   | 17.3388 | 41.7333 | 1.534  | 2.5053 |
| 4/16/2019 7:19 | 0.1083 | -0.45   | 33.8133 | -0.0833  | 17.0491 | 41.39   | 1.5266 | 2.519  |
| 4/16/2019 7:20 | 0.2    | -0.6167 | 31.6008 | -0.25    | 16.4975 | 40.975  | 1.4334 | 2.479  |
| 4/16/2019 7:21 | 0.2    | -0.4833 | 31.0333 | 183.2    | 16.2569 | 40.5    | 1.4434 | 2.4764 |
| 4/16/2019 7:22 | 0.2    | -0.8667 | 28.3492 | 21.65    | 15.7758 | 39.875  | 1.3368 | 2.4451 |
| 4/16/2019 7:23 | 0.1083 | -0.3167 | 27.7925 | 183.0167 | 15.608  | 39.2546 | 1.3833 | 2.4474 |
| 4/16/2019 7:24 | 0.1583 | -0.2167 | 29.3183 | 0.3833   | 15.7831 | 38.5909 | 1.4037 | 2.4994 |
| 4/16/2019 7:25 | 0.2    | -0.4    | 30.0267 | -0.15    | 15.9042 | 38.1583 | 1.4426 | 2.5027 |
| 4/16/2019 7:26 | 0.2    | -0.5    | 29.4275 | -0.3667  | 16.086  | 37.7    | 1.4814 | 2.5118 |
| 4/16/2019 7:27 | 0.1333 | 0.05    | 30.9442 | 137.8167 | 16.1224 | 37.35   | 1.4968 | 2.527  |
| 4/16/2019 7:28 | 0.1    | -0.05   | 30.3108 | 137.6    | 15.9977 | 36.9909 | 1.5046 | 2.5341 |
| 4/16/2019 7:29 | 0.1    | -0.2833 | 28.2075 | 219.48   | 15.6527 | 36.5818 | 1.4424 | 2.5082 |
| 4/16/2019 7:30 | 0.1    | -0.2167 | 27.41   | -0.41    | 15.2656 | 36.2546 | 1.3952 | 2.4495 |
| 4/16/2019 7:31 | 0.1    | -0.15   | 25.8575 | -0.3833  | 15.0037 | 35.98   | 1.3578 | 2.4547 |
| 4/16/2019 7:32 | 0.1    | -0.4    | 23.5933 | 138.8    | 14.5093 | 35.4636 | 1.2838 | 2.4386 |
| 4/16/2019 7:33 | 0.0833 | 0.0333  | 22.6858 | 70.1333  | 14.2313 | 35.125  | 1.2824 | 2.4399 |
| 4/16/2019 7:34 | 0.1    | -0.1167 | 22.2867 | 298.8    | 14.0378 | 34.78   | 1.2402 | 2.4063 |
| 4/16/2019 7:35 | 0.1    | -0.55   | 22.2533 | 80.1917  | 13.9646 | 34.4833 | 1.251  | 2.4161 |
| 4/16/2019 7:36 | 0.1    | -0.45   | 22.5325 | 3.0273   | 13.9876 | 34.3364 | 1.2795 | 2.465  |
| 4/16/2019 7:37 | 0.1    | -0.4167 | 23.1    | 32.3917  | 13.9761 | 34.0364 | 1.2925 | 2.4721 |
| 4/16/2019 7:38 | 0.1    | 0.35    | 23.9375 | 208.5583 | 14.1363 | 33.71   | 1.3368 | 2.4851 |
| 4/16/2019 7:39 | 0.1    | -0.5167 | 23.4383 | 65.3917  | 14.0926 | 33.4364 | 1.3362 | 2.4698 |
| 4/16/2019 7:40 | 0.1    | 0.1     | 23.0383 | 124.8    | 13.9955 | 33.1    | 1.3144 | 2.5008 |
| 4/16/2019 7:41 | 0.1    | -0.3833 | 22.9658 | 0.8455   | 13.8116 | 32.7083 | 1.2997 | 2.5156 |
| 4/16/2019 7:42 | 0.1    | 0.05    | 21.3392 | 1.6636   | 13.5496 | 32.4364 | 1.2553 | 2.4804 |
| 4/16/2019 7:43 | 0.1    | -0.0833 | 19.1733 | 1.5875   | 13.1168 | 32.0583 | 1.1823 | 2.4327 |
| 4/16/2019 7:44 | 0.1    | -0.1833 | 20.0675 | 0.4      | 13.0735 | 31.825  | 1.1998 | 2.4368 |
| 4/16/2019 7:45 | 0.1    | 0.1333  | 19.2242 | -0.3667  | 12.8888 | 31.5333 | 1.1721 | 2.4395 |
| 4/16/2019 7:46 | 0.1    | 0.0833  | 17.8475 | -0.0167  | 12.6459 | 31.2636 | 1.1404 | 2.423  |
| 4/16/2019 7:47 | 0.1    | -0.0667 | 18.535  | -0.1875  | 12.6605 | 31.0667 | 1.1663 | 2.4257 |
| 4/16/2019 7:48 | 0.1    | -0.1167 | 18.8433 | 0.4455   | 12.6388 | 30.8417 | 1.1835 | 2.4132 |
| 4/16/2019 7:49 | 0.1167 | -0.6667 | 18.5783 | -0.1667  | 12.5876 | 30.625  | 1.1913 | 2.4583 |
| 4/16/2019 7:50 | 0.1667 | -0.95   | 17.49   | -0.4917  | 12.2517 | 30.25   | 1.1193 | 2.3878 |
| 4/16/2019 7:51 | 0.1833 | -0.4167 | 17.9342 | -0.4833  | 12.3384 | 29.6909 | 1.1483 | 2.4293 |
| 4/16/2019 7:52 | 0.1167 | -0.4333 | 18.9775 | 0.2917   | 12.477  | 29.4    | 1.1803 | 2.4748 |
| 4/16/2019 7:53 | 0.1    | 0.0167  | 18.4933 | -0.3417  | 12.4125 | 29.1364 | 1.1861 | 2.4671 |
| 4/16/2019 7:54 | 0.1    | 0       | 18.8858 | -0.3917  | 12.4284 | 28.9417 | 1.1901 | 2.4886 |
| 4/16/2019 7:55 | 0.05   | -0.0667 | 17.6983 | 0.2583   | 12.2356 | 28.73   | 1.1387 | 2.4591 |
| 4/16/2019 7:56 | 0.0917 | 0.05    | 15.9675 | -0.2083  | 12.219  | 28.5364 | 1.0817 | 2.3944 |
| 4/16/2019 7:57 | 0.1    | -0.6833 | 15.6092 | 0.2167   | 12.101  | 28.2    | 1.043  | 2.3908 |
| 4/16/2019 7:58 | 0.1    | -0.55   | 15.5867 | -0.55    | 11.5297 | 28.0182 | 1.0579 | 2.3811 |
| 4/16/2019 7:59 | 0.1    | 0.0333  | 13.8667 | -0.5     | 11.3748 | 27.8182 | 1.0318 | 2.3633 |
| 4/16/2019 8:00 | 0.1    | -0.0667 | 14.7625 | 0.0667   | 11.3556 | 27.4818 | 1.0344 | 2.4109 |
| 4/16/2019 8:01 | 0.1    | -0.15   | 14.7333 | -0.9667  | 11.3578 | 27.13   | 1.0661 | 2.4331 |
| 4/16/2019 8:02 | 0.0417 | -0.3833 | 14.9125 | -0.45    | 11.3325 | 26.9273 | 1.0467 | 2.424  |
| 4/16/2019 8:03 | 0      | -0.3833 | 15.3908 | -0.45    | 11.424  | 26.78   | 1.0806 | 2.4251 |
| 4/16/2019 8:04 | 0      | -0.0667 | 16.3733 | -0.4167  | 11.4923 | 26.5727 | 1.1046 | 2.4856 |

|                |         |         |         |         |         |         |        |        |
|----------------|---------|---------|---------|---------|---------|---------|--------|--------|
| 4/16/2019 8:05 | 0       | -0.1167 | 15.6458 | -0.1333 | 11.3124 | 26.3364 | 1.0798 | 2.4908 |
| 4/16/2019 8:06 | 0       | 0.55    | 14.9825 | -0.0333 | 11.1783 | 26.0167 | 1.0599 | 2.4451 |
| 4/16/2019 8:07 | 0       | -0.1167 | 15.2458 | -0.6833 | 11.109  | 25.7727 | 1.0489 | 2.4278 |
| 4/16/2019 8:08 | 0.1     | 0.25    | 14.4842 | 0       | 10.938  | 25.6083 | 1.0279 | 2.4247 |
| 4/16/2019 8:09 | 0.1     | 0.2833  | 13.77   | 0.1333  | 10.7224 | 25.4583 | 0.9912 | 2.4003 |
| 4/16/2019 8:10 | 0.1167  | -0.2833 | 12.8442 | -0.6167 | 10.6119 | 25.25   | 0.9727 | 2.4091 |
| 4/16/2019 8:11 | 0.15    | -0.65   | 13.2358 | -0.1833 | 10.4588 | 25.07   | 0.9667 | 2.3941 |
| 4/16/2019 8:12 | 0.2     | -0.7333 | 12.5883 | -0.7667 | 10.3461 | 24.9083 | 0.9416 | 2.3937 |
| 4/16/2019 8:13 | 0.2     | -0.6    | 12.3417 | -0.3583 | 10.3089 | 24.69   | 0.9536 | 2.3968 |
| 4/16/2019 8:14 | 0.2417  | -0.2    | 12.4358 | -0.2917 | 10.1933 | 24.3909 | 0.9331 | 2.3685 |
| 4/16/2019 8:15 | 0.3     | -0.4    | 12.0925 | -0.4417 | 10.2189 | 24.2273 | 0.9346 | 2.4186 |
| 4/16/2019 8:16 | 0.3     | -0.0833 | 12.5092 | -0.0667 | 10.3109 | 23.9083 | 0.9577 | 2.4286 |
| 4/16/2019 8:17 | 0.3     | -0.6667 | 12.9742 | -0.125  | 10.3716 | 23.6636 | 0.9723 | 2.4364 |
| 4/16/2019 8:18 | 0.3     | 0.2833  | 13.1992 | -0.2667 | 10.3613 | 23.375  | 0.9965 | 2.477  |
| 4/16/2019 8:19 | 0.3     | 0.6     | 12.9442 | -0.1417 | 10.2961 | 23.2364 | 0.9735 | 2.4638 |
| 4/16/2019 8:20 | 0.2917  | 0.1333  | 12.3192 | -0.6167 | 10.1672 | 23.0417 | 0.955  | 2.4533 |
| 4/16/2019 8:21 | 0.2417  | -0.4667 | 12.3783 | -0.15   | 10.0017 | 22.8583 | 0.9422 | 2.4033 |
| 4/16/2019 8:22 | 0.3     | 0.0333  | 11.5533 | -0.4    | 9.7426  | 22.6636 | 0.8735 | 2.3463 |
| 4/16/2019 8:23 | 0.3333  | 0.0167  | 10.5867 | 0.075   | 9.4928  | 22.4182 | 0.8322 | 2.3102 |
| 4/16/2019 8:24 | 0.5667  | 0.9     | 9.9227  | -0.325  | 9.2483  | 22.0364 | 0.7779 | 2.2742 |
| 4/16/2019 8:25 | 1.0083  | 1.4333  | 9.9188  | 1.5667  | 9.3178  | 21.425  | 0.6732 | 2.1915 |
| 4/16/2019 8:26 | 1.7583  | 2.6833  | 9.2802  | 2.6333  | 9.2282  | 20.54   | 0.5547 | 2.0774 |
| 4/16/2019 8:27 | 2.625   | 3.6167  | 9.3067  | 3.9     | 9.4283  | 19.5182 | 0.4773 | 1.9921 |
| 4/16/2019 8:28 | 3.525   | 5.0833  | 9.4383  | 4.5833  | 9.1902  | 18.2    | 0.4056 | 1.9384 |
| 4/16/2019 8:29 | 4.1364  | 4.55    | 9.632   | 4.5167  | 9.5307  | 16.72   | 0.4031 | 1.9042 |
| 4/16/2019 8:30 | 4.4167  | 4.85    | 9.5202  | 3.9417  | 10.2543 | 15.3583 | 0.4208 | 1.9107 |
| 4/16/2019 8:31 | 4.6583  | 6.2     | 10.6    | 5.4833  | 9.6025  | 13.8417 | 0.3724 | 1.8168 |
| 4/16/2019 8:32 | 4.85    | 6.1     | 9.8785  | 4.8583  | 9.9084  | 12.2833 | 0.3502 | 1.7952 |
| 4/16/2019 8:33 | 5.3833  | 7.35    | 10.1248 | 6.5167  | 9.3098  | 10.7583 | 0.3249 | 1.7657 |
| 4/16/2019 8:34 | 5.7583  | 6.8833  | 10.9317 | 7.2833  | 9.1392  | 9.3     | 0.3045 | 1.7368 |
| 4/16/2019 8:35 | 6.625   | 7.8167  | 11.3075 | 8.4333  | 8.1448  | 7.8583  | 0.2313 | 1.6962 |
| 4/16/2019 8:36 | 7.4333  | 9.2167  | 10.9303 | 9.0167  | 7.669   | 6.5     | 0.2192 | 1.6748 |
| 4/16/2019 8:37 | 8.175   | 9.1167  | 11.9767 | 9.0333  | 7.2234  | 5.375   | 0.205  | 1.6906 |
| 4/16/2019 8:38 | 8.5583  | 9.6333  | 12.305  | 9.4833  | 6.9764  | 4.4833  | 0.1791 | 1.6693 |
| 4/16/2019 8:39 | 8.7333  | 9.45    | 12.4167 | 9.55    | 7.2066  | 3.7667  | 0.1978 | 1.6717 |
| 4/16/2019 8:40 | 8.8333  | 8.9     | 12.36   | 9.5     | 7.214   | 3.2833  | 0.1802 | 1.6948 |
| 4/16/2019 8:41 | 8.85    | 9.3     | 11.9667 | 9.35    | 7.145   | 2.9417  | 0.1863 | 1.664  |
| 4/16/2019 8:42 | 9.05    | 9.8667  | 12.9483 | 10.425  | 6.6349  | 2.6083  | 0.1694 | 1.6652 |
| 4/16/2019 8:43 | 9.5     | 10.9333 | 12.6133 | 10.4583 | 6.1321  | 2.26    | 0.1435 | 1.6611 |
| 4/16/2019 8:44 | 10.2167 | 11.4    | 13.8567 | 11.8833 | 5.6723  | 2.0364  | 0.14   | 1.6531 |
| 4/16/2019 8:45 | 10.9167 | 12.45   | 14.1017 | 11.9    | 5.319   | 1.86    | 0.1217 | 1.6351 |
| 4/16/2019 8:46 | 11.4917 | 12.9    | 15.1267 | 12.9083 | 4.9722  | 1.6636  | 0.104  | 1.6051 |
| 4/16/2019 8:47 | 12.7167 | 16.4    | 18.9733 | 17.7    | 4.7997  | 1.5333  | 0.1025 | 1.6281 |
| 4/16/2019 8:48 | 14.8833 | 19.2167 | 20.11   | 19.5417 | 4.8009  | 1.45    | 0.0926 | 1.6628 |
| 4/16/2019 8:49 | 16.725  | 18.6    | 20.55   | 18.95   | 4.9196  | 1.3727  | 0.0943 | 1.6429 |
| 4/16/2019 8:50 | 17.8167 | 19.1    | 20.9367 | 19.5417 | 4.798   | 1.3     | 0.0887 | 1.6419 |
| 4/16/2019 8:51 | 17.975  | 19.7    | 21.1983 | 19.95   | 4.5795  | 1.3     | 0.0755 | 1.6069 |

|                |         |         |          |         |         |         |        |        |
|----------------|---------|---------|----------|---------|---------|---------|--------|--------|
| 4/16/2019 8:52 | 18.3167 | 19      | 20.6133  | 19.15   | 4.5773  | 1.2583  | 0.0749 | 1.614  |
| 4/16/2019 8:53 | 18.25   | 18.05   | 20.0367  | 18.5083 | 4.5933  | 1.2     | 0.0853 | 1.6063 |
| 4/16/2019 8:54 | 18.2    | 19.0833 | 21.1867  | 19.9417 | 4.6025  | 1.2     | 0.0601 | 1.599  |
| 4/16/2019 8:55 | 18.05   | 18.2833 | 20.5767  | 18.9    | 4.4983  | 1.2     | 0.0741 | 1.6295 |
| 4/16/2019 8:56 | 18.175  | 19      | 19.5983  | 19.5    | 4.3765  | 1.1364  | 0.0698 | 1.6345 |
| 4/16/2019 8:57 | 18.55   | 20.2333 | 21.3833  | 21.4    | 4.364   | 1.1     | 0.0631 | 1.5803 |
| 4/16/2019 8:58 | 19.5083 | 20.6167 | 22.6017  | 21.7    | 4.2877  | 1.1     | 0.0632 | 1.5812 |
| 4/16/2019 8:59 | 20.4667 | 21.4333 | 23.1833  | 22.6417 | 3.8186  | 1.1     | 0.0442 | 1.5568 |
| 4/16/2019 9:00 | 20.8    | 20.3167 | 21.51    | 21.6333 | 3.8033  | 1.0333  | 0.0598 | 1.5671 |
| 4/16/2019 9:01 | 20.5083 | 20.6    | 21.6267  | 21.5417 | 3.8632  | 1.1     | 0.0558 | 1.5706 |
| 4/16/2019 9:02 | 20.3083 | 21.4833 | 23.25    | 22.9083 | 3.6352  | 1       | 0.045  | 1.5691 |
| 4/16/2019 9:03 | 20.35   | 20.9167 | 21.0717  | 21.5583 | 3.6359  | 1       | 0.0589 | 1.5718 |
| 4/16/2019 9:04 | 20.4917 | 20.75   | 22.7867  | 21.35   | 3.5478  | 1       | 0.044  | 1.5525 |
| 4/16/2019 9:05 | 20.5417 | 20.7    | 22.7367  | 21.4667 | 3.5011  | 1       | 0.0477 | 1.5525 |
| 4/16/2019 9:06 | 20.5667 | 21.15   | 22.4833  | 21.85   | 3.4922  | 1.0091  | 0.0513 | 1.5986 |
| 4/16/2019 9:07 | 20.6667 | 21.8833 | 23.005   | 22.125  | 3.4627  | 1.1     | 0.0379 | 1.6063 |
| 4/16/2019 9:08 | 20.6917 | 22.0833 | 23.2533  | 23.35   | 3.3918  | 1.1     | 0.0543 | 1.5934 |
| 4/16/2019 9:09 | 21.2273 | 22.5667 | 23.91    | 22.175  | 3.2119  | 1.1     | 0.033  | 1.6255 |
| 4/16/2019 9:10 | 21.55   | 21.7167 | 23.0867  | 22.5833 | 3.2123  | 1.1     | 0.0345 | 1.6134 |
| 4/16/2019 9:11 | 21.9    | 21.6333 | 23.2817  | 22.7    | 3.1385  | 1.1     | 0.0349 | 1.6043 |
| 4/16/2019 9:12 | 21.6833 | 21.3333 | 22.985   | 22.4667 | 3.1516  | 1.13    | 0.0197 | 1.5968 |
| 4/16/2019 9:13 | 21.5333 | 21.0667 | 23.2333  | 22.3583 | 3.1418  | 1.15    | 0.0421 | 1.6135 |
| 4/16/2019 9:14 | 20.925  | 20.4667 | 22.0733  | 20.3583 | 3.1328  | 1.1833  | 0.0348 | 1.6108 |
| 4/16/2019 9:15 | 20.15   | 19.7667 | 21.045   | 19.475  | 3.1711  | 1.2     | 0.0362 | 1.6389 |
| 4/16/2019 9:16 | 19.3167 | 19      | 20.9083  | 19.2333 | 3.2085  | 1.2     | 0.0452 | 1.6413 |
| 4/16/2019 9:17 | 18.55   | 17.9167 | 19.6633  | 18.05   | 3.2521  | 1.2556  | 0.0415 | 1.6506 |
| 4/16/2019 9:18 | 17.7083 | 16.3833 | 18.4467  | 16.9083 | 3.2889  | 1.3     | 0.0458 | 1.6828 |
| 4/16/2019 9:19 | 16.675  | 15.6    | 17.5367  | 16.8167 | 3.2751  | 1.3     | 0.0489 | 1.6822 |
| 4/16/2019 9:20 | 15.95   | 15.9833 | 17.6583  | 16.1167 | 3.2583  | 1.3     | 0.0356 | 1.6672 |
| 4/16/2019 9:21 | 15.5667 | 15.2833 | 17.2717  | 16.025  | 3.2589  | 1.31    | 0.0536 | 1.7016 |
| 4/16/2019 9:22 | 15.2833 | 14.9    | 17.0867  | 14.4083 | 3.2344  | 1.4     | 0.0397 | 1.7206 |
| 4/16/2019 9:23 | 15.1333 | 15      | 16.9867  | 16.6    | 3.2293  | 1.4     | 0.0416 | 1.7211 |
| 4/16/2019 9:24 | 15.05   | 15.5167 | 16.99    | 15.7083 | 3.2295  | 1.4     | 0.0494 | 1.7118 |
| 4/16/2019 9:25 | 15.0583 | 15      | 17.1783  | 15.4667 | 3.2408  | 1.4636  | 0.0415 | 1.7185 |
| 4/16/2019 9:26 | 14.8417 | 14.8833 | 17.09    | 15.3417 | 3.2191  | 1.5     | 0.047  | 1.7377 |
| 4/16/2019 9:27 | 14.525  | 14.7833 | 16.465   | 14.5    | 3.2281  | 1.5     | 0.046  | 1.741  |
| 4/16/2019 9:28 | 14.15   | 13.6    | 15.825   | 14.025  | 3.2378  | 1.5     | 0.05   | 1.7276 |
| 4/16/2019 9:29 | 13.525  | 12.45   | 14.835   | 12.7917 | 3.2389  | 1.5     | 0.0468 | 1.7533 |
| 4/16/2019 9:30 | 12.825  | 11.5167 | 14.2283  | 12.0333 | 3.3755  | 1.5167  | 0.0445 | 1.7869 |
| 4/16/2019 9:31 | 11.9667 | 11.1167 | 25.8867  | 17.1167 | 18.8076 | 2.3455  | 0.4996 | 1.8516 |
| 4/16/2019 9:32 | 10.45   | 9.5333  | 66.5467  | 14.1583 | 25.2095 | 29.0833 | 1.361  | 2.129  |
| 4/16/2019 9:33 | 8.6333  | 6.95    | 66.0517  | 13.6583 | 25.556  | 16.8583 | 1.4678 | 2.0888 |
| 4/16/2019 9:34 | 5.775   | 3.1667  | 92.55    | 12.9917 | 40.6261 | 36.2917 | 2.4758 | 2.4057 |
| 4/16/2019 9:35 | 3.375   | 3.05    | 126.55   | 16.8583 | 48.7722 | 54.4545 | 3.43   | 2.5893 |
| 4/16/2019 9:36 | 1.275   | 1.1167  | 137.9833 | 15.7917 | 52.3662 | 65.3546 | 3.6638 | 2.7461 |
| 4/16/2019 9:37 | 0.5917  | 1.8667  | 136.0333 | 14.8583 | 50.6512 | 62.6417 | 3.3935 | 2.6952 |
| 4/16/2019 9:38 | 0.35    | 2.45    | 132.0167 | 15.05   | 53.465  | 63.05   | 3.3078 | 2.7045 |

|                 |        |        |          |         |         |         |        |        |
|-----------------|--------|--------|----------|---------|---------|---------|--------|--------|
| 4/16/2019 9:39  | 0.3    | 2.6833 | 138.3    | 16.225  | 52.6458 | 65.975  | 3.7893 | 2.7844 |
| 4/16/2019 9:40  | 0.3    | 1.5167 | 145.6833 | 15.9917 | 51.2682 | 65.5545 | 4.5322 | 2.8485 |
| 4/16/2019 9:41  | 0.3417 | 2.3833 | 133.8167 | 14.825  | 48.1631 | 59.6273 | 4.44   | 2.8233 |
| 4/16/2019 9:42  | 0.3667 | 2.85   | 126.0667 | 14.3583 | 47.1486 | 58.4364 | 4.1733 | 2.7482 |
| 4/16/2019 9:43  | 0.3    | 2.1167 | 121.8833 | 14.55   | 46.2514 | 58.3556 | 3.9297 | 2.7238 |
| 4/16/2019 9:44  | 0.2833 | 1.65   | 129.9    | 14.7417 | 45.2194 | 58.06   | 4.916  | 2.7773 |
| 4/16/2019 9:45  | 0.2417 | 2.5667 | 124.2333 | 14.0083 | 45.9911 | 58.075  | 4.5332 | 2.7712 |
| 4/16/2019 9:46  | 0.2    | 1.6    | 116.4    | 12.9083 | 43.9229 | 57.92   | 4.391  | 2.7367 |
| 4/16/2019 9:47  | 0.2    | 1.65   | 111.7833 | 13.0833 | 42.7324 | 57.7167 | 4.294  | 2.6878 |
| 4/16/2019 9:48  | 0.2    | 2.1    | 110.6167 | 13.4583 | 42.9853 | 57.4583 | 4.0897 | 2.6996 |
| 4/16/2019 9:49  | 0.2    | 1.2833 | 105.9833 | 12.725  | 41.2406 | 57.25   | 4.3073 | 2.6661 |
| 4/16/2019 9:50  | 0.2    | 1.4833 | 103.9333 | 12.7583 | 41.0265 | 56.9    | 4.1792 | 2.6428 |
| 4/16/2019 9:51  | 0.25   | 1.4667 | 102.7    | 13.0417 | 41.2931 | 56.6364 | 4.0075 | 2.6553 |
| 4/16/2019 9:52  | 0.3    | 1.8667 | 98.5467  | 12.7583 | 40.3038 | 56.05   | 3.818  | 2.6397 |
| 4/16/2019 9:53  | 0.3    | 1.3    | 96.9067  | 12.2333 | 40.0286 | 55.6818 | 3.849  | 2.6568 |
| 4/16/2019 9:54  | 0.4    | 1.5667 | 91.4217  | 12.2333 | 38.0898 | 55.1818 | 3.773  | 2.6059 |
| 4/16/2019 9:55  | 0.4    | 1.95   | 90.1217  | 12.0333 | 38.0033 | 54.6091 | 3.623  | 2.5702 |
| 4/16/2019 9:56  | 0.3583 | 1.4333 | 89.7767  | 11.6    | 37.8091 | 54.0833 | 3.6475 | 2.5943 |
| 4/16/2019 9:57  | 0.3    | 1.7    | 87.9992  | 11.5083 | 37.5971 | 53.4091 | 3.5923 | 2.6312 |
| 4/16/2019 9:58  | 0.3    | 2.1167 | 87.4425  | 11.9333 | 37.619  | 52.875  | 3.6152 | 2.6501 |
| 4/16/2019 9:59  | 0.3    | 1.9167 | 85.98    | 11.85   | 37.5558 | 52.45   | 3.554  | 2.6659 |
| 4/16/2019 10:00 | 0.3167 | 1.55   | 85.3392  | 11.675  | 36.6968 | 51.9182 | 3.5793 | 2.6338 |
| 4/16/2019 10:01 | 0.3667 | 1.3667 | 83.9567  | 11.1417 | 36.2049 | 51.5273 | 3.5457 | 2.6109 |
| 4/16/2019 10:02 | 0.4    | 0.9667 | 79.1933  | 10.8583 | 34.3051 | 51.0167 | 3.4022 | 2.5808 |
| 4/16/2019 10:03 | 0.4    | 1.05   | 75.0433  | 10.725  | 33.2497 | 50.3455 | 3.3065 | 2.5649 |
| 4/16/2019 10:04 | 0.4    | 1.0667 | 76.1     | 11      | 33.5945 | 49.9455 | 3.3712 | 2.561  |
| 4/16/2019 10:05 | 0.3917 | 1.4333 | 71.8383  | 10.225  | 32.011  | 49.3091 | 3.1857 | 2.5247 |
| 4/16/2019 10:06 | 0.3083 | 1.5833 | 74.7408  | 10.6667 | 32.7224 | 48.7667 | 3.3118 | 2.5728 |
| 4/16/2019 10:07 | 0.3    | 1.3    | 74.5125  | 10.35   | 33.0136 | 48.52   | 3.3767 | 2.6048 |
| 4/16/2019 10:08 | 0.3    | 1.4167 | 70.0525  | 10.05   | 31.7096 | 48.1818 | 3.221  | 2.5491 |
| 4/16/2019 10:09 | 0.3    | 1.1833 | 68.2458  | 9.7167  | 30.6782 | 47.5667 | 3.1618 | 2.5069 |
| 4/16/2019 10:10 | 0.3    | 1.5667 | 66.2375  | 10.0583 | 30.4396 | 47.0636 | 3.1537 | 2.5401 |
| 4/16/2019 10:11 | 0.3    | 1      | 66.3625  | 9.875   | 30.0608 | 46.5833 | 3.1398 | 2.5495 |
| 4/16/2019 10:12 | 0.2083 | 0.8333 | 66.105   | 9.5333  | 29.9748 | 46.1727 | 3.1745 | 2.5123 |
| 4/16/2019 10:13 | 0.2    | 0.3833 | 64.6833  | 9       | 29.7177 | 45.6917 | 3.1572 | 2.5121 |
| 4/16/2019 10:14 | 0.2    | 0.4667 | 62.5217  | 9.45    | 28.7011 | 45.26   | 3.0557 | 2.5039 |
| 4/16/2019 10:15 | 0.2    | 1.0167 | 64.9958  | 9.3417  | 29.3398 | 44.9583 | 3.157  | 2.5241 |
| 4/16/2019 10:16 | 0.1667 | 1.0667 | 62.8092  | 9.4333  | 28.5788 | 44.6111 | 3.08   | 2.5136 |
| 4/16/2019 10:17 | 0.1667 | 0.7333 | 55.1408  | 8.375   | 26.5323 | 44.0636 | 2.8693 | 2.454  |
| 4/16/2019 10:18 | 0.2    | 1.2    | 55.4117  | 8.4083  | 26.1238 | 43.5833 | 2.8675 | 2.437  |
| 4/16/2019 10:19 | 0.1917 | 1.6833 | 58.1117  | 9.0167  | 26.9423 | 42.9364 | 2.9612 | 2.4801 |
| 4/16/2019 10:20 | 0.1417 | 0.6667 | 58.6542  | 9.3583  | 27.0806 | 42.42   | 3.0087 | 2.5188 |
| 4/16/2019 10:21 | 0.125  | 1.4833 | 54.8717  | 8.8583  | 25.9158 | 42.08   | 2.8812 | 2.4899 |
| 4/16/2019 10:22 | 0.2    | 1.15   | 53.2783  | 8.1083  | 25.1501 | 41.6182 | 2.8287 | 2.4677 |
| 4/16/2019 10:23 | 0.2    | 1.1333 | 51.2117  | 8.15    | 24.6653 | 41.1091 | 2.7962 | 2.4973 |
| 4/16/2019 10:24 | 0.2    | 0.8    | 50.0717  | 7.0917  | 24.3962 | 40.64   | 2.7712 | 2.4758 |
| 4/16/2019 10:25 | 0.1333 | 1.3167 | 54.0333  | 7.8917  | 25.111  | 40.1818 | 2.8895 | 2.4876 |

|                 |         |         |         |         |         |         |        |        |
|-----------------|---------|---------|---------|---------|---------|---------|--------|--------|
| 4/16/2019 10:26 | 0.1     | 0.8833  | 52.9292 | 7.775   | 24.8707 | 39.89   | 2.8608 | 2.4994 |
| 4/16/2019 10:27 | 0.1917  | 0.9667  | 51.1317 | 8.5583  | 24.2899 | 39.4364 | 2.7832 | 2.4567 |
| 4/16/2019 10:28 | 0.2     | 0.1167  | 52.4542 | 7.9     | 24.4688 | 39.1364 | 2.83   | 2.4691 |
| 4/16/2019 10:29 | 0.1917  | 1       | 52.3442 | 7.2333  | 24.2943 | 39      | 2.8197 | 2.4904 |
| 4/16/2019 10:30 | 0.1     | 0.8     | 50.9583 | 7.6583  | 24.0043 | 38.9182 | 2.825  | 2.4876 |
| 4/16/2019 10:31 | 0.1     | 0.45    | 50.4967 | 7.675   | 23.6084 | 38.8417 | 2.7865 | 2.5034 |
| 4/16/2019 10:32 | 0.1     | 1.1167  | 49.8992 | 7.325   | 23.4067 | 38.6455 | 2.7837 | 2.4972 |
| 4/16/2019 10:33 | 0.1667  | 1.4167  | 46.6983 | 6.75    | 22.3496 | 38.3583 | 2.6677 | 2.454  |
| 4/16/2019 10:34 | 0.2     | 0.25    | 45.1583 | 6.8833  | 21.6858 | 38.13   | 2.6012 | 2.4598 |
| 4/16/2019 10:35 | 0.2167  | 0.5     | 46.27   | 7.0083  | 21.8786 | 37.825  | 2.6532 | 2.4747 |
| 4/16/2019 10:36 | 0.2833  | 1.5833  | 46.0583 | 7.25    | 21.9623 | 37.6455 | 2.669  | 2.4913 |
| 4/16/2019 10:37 | 0.2333  | 0.85    | 43.8325 | 6.7667  | 21.2343 | 37.35   | 2.5885 | 2.4859 |
| 4/16/2019 10:38 | 0.3     | 0.6     | 43.3142 | 6.8167  | 20.9841 | 36.8273 | 2.5803 | 2.4917 |
| 4/16/2019 10:39 | 0.3     | 0.55    | 41.8533 | 6.225   | 20.3694 | 36.475  | 2.5067 | 2.4376 |
| 4/16/2019 10:40 | 0.3     | 1.05    | 41.3783 | 6.775   | 20.2922 | 36.02   | 2.5206 | 2.4098 |
| 4/16/2019 10:41 | 0.3     | 0.2833  | 42.2667 | 6.6083  | 20.4506 | 35.5583 | 2.5396 | 2.4245 |
| 4/16/2019 10:42 | 0.3     | 0.5     | 42.3225 | 6.3417  | 20.4313 | 35.0818 | 2.5473 | 2.4673 |
| 4/16/2019 10:43 | 0.3     | 1.05    | 43.8567 | 6.1667  | 20.798  | 34.85   | 2.6245 | 2.5242 |
| 4/16/2019 10:44 | 0.3     | 1.1333  | 42.9408 | 5.9667  | 20.4755 | 34.4545 | 2.5852 | 2.5218 |
| 4/16/2019 10:45 | 0.3     | 0.4     | 43.3067 | 6.4583  | 20.4977 | 34.1455 | 2.5995 | 2.5308 |
| 4/16/2019 10:46 | 0.3167  | 0.8833  | 41.7508 | 6.1583  | 19.9568 | 34.025  | 2.5327 | 2.5087 |
| 4/16/2019 10:47 | 0.3083  | 0.5333  | 40.7217 | 5.7833  | 19.4108 | 33.7546 | 2.4761 | 2.5048 |
| 4/16/2019 10:48 | 0.3333  | 0.65    | 37.64   | 6.1333  | 18.472  | 33.36   | 2.3717 | 2.4569 |
| 4/16/2019 10:49 | 0.4     | 0.5667  | 36.3442 | 5.5083  | 18.057  | 32.9636 | 2.3282 | 2.4347 |
| 4/16/2019 10:50 | 0.4     | 1.1333  | 36.425  | 5.65    | 17.9372 | 32.56   | 2.326  | 2.402  |
| 4/16/2019 10:51 | 0.4667  | 0.9333  | 34.0042 | 5.5333  | 17.2414 | 32.2546 | 2.2119 | 2.3713 |
| 4/16/2019 10:52 | 0.8667  | 3.9167  | 30.9558 | 6.825   | 15.9575 | 31.5667 | 1.9429 | 2.2813 |
| 4/16/2019 10:53 | 1.8583  | 5.5333  | 27.4108 | 8.2167  | 15.6893 | 30.4917 | 1.6118 | 2.1559 |
| 4/16/2019 10:54 | 3.0333  | 5.9833  | 25.0958 | 8.5667  | 15.5322 | 29.0909 | 1.3848 | 2.0543 |
| 4/16/2019 10:55 | 4.1667  | 6.95    | 22.7875 | 8.8167  | 15.8081 | 27.3583 | 1.1993 | 1.9783 |
| 4/16/2019 10:56 | 5.0083  | 7.6333  | 20.7533 | 9.7333  | 15.2485 | 25.3667 | 1.0254 | 1.8575 |
| 4/16/2019 10:57 | 5.3333  | 6.5333  | 21.885  | 8.1333  | 16.5518 | 23.5091 | 1.2651 | 1.8903 |
| 4/16/2019 10:58 | 5.625   | 8.05    | 20.4708 | 8.825   | 17.0415 | 21.5273 | 1.2516 | 1.8621 |
| 4/16/2019 10:59 | 5.675   | 7.9333  | 20.0883 | 9.3667  | 17.065  | 19.5546 | 1.1316 | 1.8198 |
| 4/16/2019 11:00 | 6.3667  | 9.1167  | 19.9492 | 11.1417 | 16.9928 | 17.5546 | 0.9441 | 1.7678 |
| 4/16/2019 11:01 | 7.2083  | 9.8833  | 19.6275 | 11.425  | 14.7228 | 15.4273 | 0.8529 | 1.7255 |
| 4/16/2019 11:02 | 8.2417  | 12.0167 | 19.9042 | 12.9333 | 13.4263 | 13.3546 | 0.7685 | 1.6767 |
| 4/16/2019 11:03 | 9.2583  | 12.3833 | 20.3442 | 14.1917 | 12.5836 | 11.35   | 0.6642 | 1.6347 |
| 4/16/2019 11:04 | 10.3083 | 14.2667 | 20.1633 | 15.1833 | 11.2576 | 9.45    | 0.5616 | 1.5918 |
| 4/16/2019 11:05 | 11.1    | 13.9667 | 19.9608 | 14.8167 | 10.7836 | 7.975   | 0.5607 | 1.5888 |
| 4/16/2019 11:06 | 11.2917 | 13.3667 | 19.8958 | 14.3    | 11.0223 | 6.8636  | 0.5896 | 1.5978 |
| 4/16/2019 11:07 | 11.2083 | 13      | 19.3275 | 13.9917 | 10.6128 | 6.05    | 0.574  | 1.5603 |
| 4/16/2019 11:08 | 11.6083 | 16.1833 | 20.9067 | 17.025  | 9.7828  | 5.3778  | 0.4834 | 1.5293 |
| 4/16/2019 11:09 | 12.4583 | 15.45   | 20.9083 | 16.75   | 8.9247  | 4.6364  | 0.435  | 1.506  |
| 4/16/2019 11:10 | 13.2417 | 16.15   | 20.6567 | 17.0167 | 8.5546  | 4.05    | 0.4116 | 1.5212 |
| 4/16/2019 11:11 | 13.975  | 17.1333 | 21.0233 | 17.8833 | 7.9423  | 3.55    | 0.3684 | 1.5109 |
| 4/16/2019 11:12 | 14.5417 | 18.2667 | 21.4667 | 17.95   | 7.4521  | 3.0778  | 0.3331 | 1.4778 |

|                 |         |         |         |         |        |        |        |        |
|-----------------|---------|---------|---------|---------|--------|--------|--------|--------|
| 4/16/2019 11:13 | 15.0667 | 17.8167 | 21.2583 | 18.6417 | 7.0381 | 2.7636 | 0.3177 | 1.4522 |
| 4/16/2019 11:14 | 15.425  | 17.8833 | 21.0775 | 19.2917 | 6.7662 | 2.4727 | 0.2822 | 1.4448 |
| 4/16/2019 11:15 | 15.725  | 18.9    | 21.7742 | 19.0333 | 6.5223 | 2.3083 | 0.2559 | 1.4643 |
| 4/16/2019 11:16 | 15.9333 | 17.9833 | 21.5075 | 18.8667 | 6.4466 | 2.2    | 0.2691 | 1.5152 |
| 4/16/2019 11:17 | 16.0667 | 18.8833 | 21.8492 | 19.475  | 6.1616 | 2.0917 | 0.2414 | 1.4781 |
| 4/16/2019 11:18 | 16.3167 | 19.2833 | 21.9617 | 19.2167 | 5.8262 | 1.95   | 0.2204 | 1.4513 |
| 4/16/2019 11:19 | 16.5833 | 19.2833 | 21.6025 | 19.7833 | 5.6728 | 1.8333 | 0.2252 | 1.4608 |
| 4/16/2019 11:20 | 16.9417 | 19.5833 | 22.1567 | 20.275  | 5.2509 | 1.7667 | 0.1855 | 1.4467 |
| 4/16/2019 11:21 | 17.1167 | 18.8    | 21.6833 | 20.1167 | 5.1162 | 1.7    | 0.1856 | 1.4473 |
| 4/16/2019 11:22 | 17.4833 | 19.7833 | 21.9058 | 21.075  | 4.9144 | 1.6    | 0.1691 | 1.4298 |
| 4/16/2019 11:23 | 17.8833 | 21.2667 | 22.875  | 21.9167 | 4.5995 | 1.55   | 0.129  | 1.4047 |
| 4/16/2019 11:24 | 17.875  | 19.4167 | 21.0667 | 19.7083 | 4.9758 | 1.5    | 0.1594 | 1.4267 |
| 4/16/2019 11:25 | 17.6167 | 18.9333 | 21.6442 | 19.3667 | 5.3478 | 1.5167 | 0.1616 | 1.4378 |
| 4/16/2019 11:26 | 16.8417 | 17.4833 | 19.8975 | 17.85   | 7.1732 | 1.6    | 0.1146 | 1.4143 |
| 4/16/2019 11:27 | 15.9083 | 15.3667 | 18.15   | 15.725  | 9.4444 | 1.75   | 0.1276 | 1.4065 |
| 4/16/2019 11:28 | 15.0917 | 15.5833 | 18.155  | 16.0167 | 9.8155 | 1.8444 | 0.1217 | 1.3898 |
| 4/16/2019 11:29 | 14.4417 | 15.45   | 18.2867 | 16.5667 | 9.1798 | 1.9167 | 0.1256 | 1.4021 |
| 4/16/2019 11:30 | 14.7667 | 17.55   | 18.8133 | 18.0833 | 8.4373 | 2      | 0.0958 | 1.3727 |
| 4/16/2019 11:31 | 15.4    | 17.15   | 19.2483 | 18.35   | 7.8775 | 2      | 0.0917 | 1.3534 |
| 4/16/2019 11:32 | 16.1167 | 18.1333 | 19.9617 | 18.925  | 7.4024 | 2      | 0.0682 | 1.3707 |
| 4/16/2019 11:33 | 16.4667 | 16.3333 | 19.025  | 18.575  | 7.2513 | 2      | 0.0852 | 1.3705 |
| 4/16/2019 11:34 | 16.375  | 17.6333 | 19.385  | 17.9417 | 7.1441 | 2      | 0.0868 | 1.3884 |
| 4/16/2019 11:35 | 16.425  | 17.6667 | 19.7683 | 18.55   | 6.7563 | 2      | 0.0668 | 1.3946 |
| 4/16/2019 11:36 | 16.4917 | 18.25   | 19.8767 | 18.875  | 6.5919 | 2      | 0.07   | 1.3971 |
| 4/16/2019 11:37 | 16.6333 | 17.8167 | 19.34   | 18.9917 | 6.5303 | 2      | 0.0737 | 1.4244 |
| 4/16/2019 11:38 | 16.8    | 18.9167 | 20.555  | 19.3833 | 6.3508 | 1.9364 | 0.0643 | 1.3933 |
| 4/16/2019 11:39 | 17.0667 | 17.8667 | 20.24   | 18.075  | 6.1818 | 1.8    | 0.0686 | 1.408  |
| 4/16/2019 11:40 | 17.2417 | 18.6333 | 20.2383 | 19.3333 | 6.0207 | 1.67   | 0.0667 | 1.4322 |
| 4/16/2019 11:41 | 17.5083 | 19.4333 | 20.7967 | 19.9583 | 5.6865 | 1.5273 | 0.0469 | 1.419  |
| 4/16/2019 11:42 | 17.7083 | 19.1167 | 20.505  | 19.4    | 5.6367 | 1.4364 | 0.0502 | 1.4181 |
| 4/16/2019 11:43 | 17.9417 | 18.2333 | 20.4833 | 19.3167 | 5.6465 | 1.4    | 0.0521 | 1.4267 |
| 4/16/2019 11:44 | 18.05   | 19.2833 | 20.7267 | 18.8417 | 5.4553 | 1.4    | 0.0466 | 1.3728 |
| 4/16/2019 11:45 | 18.25   | 19.5667 | 21.3617 | 20.2167 | 5.189  | 1.4    | 0.0462 | 1.3348 |
| 4/16/2019 11:46 | 18.2417 | 18.1333 | 20.6767 | 19.2083 | 5.3532 | 1.4    | 0.049  | 1.3676 |
| 4/16/2019 11:47 | 18.0167 | 18.8167 | 20.425  | 19.7167 | 5.3753 | 1.375  | 0.0387 | 1.391  |
| 4/16/2019 11:48 | 17.9833 | 19.1    | 21.32   | 19.975  | 5.0607 | 1.3    | 0.0335 | 1.3833 |
| 4/16/2019 11:49 | 18.3333 | 20.0667 | 21.7383 | 20.6333 | 4.8994 | 1.3    | 0.0349 | 1.3872 |
| 4/16/2019 11:50 | 18.8667 | 20.5333 | 21.995  | 20.7167 | 4.6978 | 1.3    | 0.0234 | 1.383  |
| 4/16/2019 11:51 | 19.0917 | 19.3667 | 21.5217 | 19.5    | 4.6208 | 1.3    | 0.0315 | 1.3564 |
| 4/16/2019 11:52 | 18.875  | 18.65   | 21.135  | 19.5583 | 4.6683 | 1.2083 | 0.0358 | 1.3385 |
| 4/16/2019 11:53 | 18.65   | 19.6667 | 21.515  | 20.1583 | 4.6018 | 1.2    | 0.0223 | 1.3373 |
| 4/16/2019 11:54 | 18.75   | 19.9667 | 21.9083 | 20.4833 | 4.357  | 1.2    | 0.0302 | 1.3289 |
| 4/16/2019 11:55 | 18.9667 | 19.9167 | 21.9233 | 20.925  | 4.2584 | 1.2    | 0.0337 | 1.3519 |
| 4/16/2019 11:56 | 19.4167 | 21.05   | 22.7317 | 21.375  | 4.0346 | 1.2    | 0.0153 | 1.3405 |
| 4/16/2019 11:57 | 19.5833 | 20.3833 | 22.16   | 20.8333 | 3.986  | 1.2    | 0.025  | 1.3528 |
| 4/16/2019 11:58 | 19.6917 | 20.15   | 21.59   | 20.5583 | 3.9324 | 1.2    | 0.0255 | 1.3508 |
| 4/16/2019 11:59 | 19.8    | 21.0167 | 22.6833 | 21.9    | 3.7604 | 1.2    | 0.0071 | 1.3776 |



|                 |         |         |         |         |         |         |        |        |
|-----------------|---------|---------|---------|---------|---------|---------|--------|--------|
| 4/16/2019 12:00 | 19.8917 | 21.55   | 22.4533 | 21.5833 | 3.744   | 1.2     | 0.0174 | 1.3758 |
| 4/16/2019 12:01 | 20.075  | 20.8167 | 22.665  | 22      | 3.7435  | 1.2     | 0.0167 | 1.3702 |
| 4/16/2019 12:02 | 19.9083 | 20.9    | 22.3    | 21.2083 | 3.6365  | 1.2     | 0.0077 | 1.3648 |
| 4/16/2019 12:03 | 19.975  | 21.85   | 23.07   | 21.2917 | 3.4788  | 1.2     | 0.0167 | 1.3857 |
| 4/16/2019 12:04 | 20.0417 | 21.5833 | 21.915  | 21.5167 | 3.4596  | 1.1417  | 0.0138 | 1.3945 |
| 4/16/2019 12:05 | 20.3333 | 21.9833 | 22.9217 | 21.3667 | 3.4363  | 1.1455  | 0.0062 | 1.3656 |
| 4/16/2019 12:06 | 20.125  | 20.0167 | 21.9283 | 20.4833 | 3.5033  | 1.2     | 0.0314 | 1.3723 |
| 4/16/2019 12:07 | 20.05   | 21      | 22.1717 | 20.4167 | 3.3761  | 1.13    | 0.0181 | 1.3591 |
| 4/16/2019 12:08 | 20.0417 | 21.6833 | 23.3467 | 21.6083 | 3.2849  | 1.1     | 0.0079 | 1.3663 |
| 4/16/2019 12:09 | 20.7417 | 22.5    | 24.0317 | 23.1667 | 3.1416  | 1.1     | 0.0169 | 1.3593 |
| 4/16/2019 12:10 | 21.2833 | 21.8167 | 23.57   | 22.3167 | 3.1686  | 1.1     | 0.0089 | 1.3568 |
| 4/16/2019 12:11 | 21.3    | 21.25   | 22.21   | 21.2917 | 3.2673  | 1.1     | 0.0024 | 1.3868 |
| 4/16/2019 12:12 | 20.85   | 21.6    | 22.3033 | 21.2833 | 3.3378  | 1.04    | 0.0163 | 1.3872 |
| 4/16/2019 12:13 | 20.2    | 19.7833 | 21.685  | 19.75   | 3.3543  | 1.0417  | 0.0061 | 1.3611 |
| 4/16/2019 12:14 | 19.7833 | 20.7    | 21.5667 | 20.2667 | 3.3718  | 1       | 0.0134 | 1.3611 |
| 4/16/2019 12:15 | 19.2917 | 20.4667 | 21.6667 | 19.675  | 3.3735  | 1       | 0.0153 | 1.3843 |
| 4/16/2019 12:16 | 18.8333 | 18.2167 | 20.2817 | 18.3667 | 3.3869  | 1       | 0.0127 | 1.3945 |
| 4/16/2019 12:17 | 18.3167 | 18.3167 | 19.7567 | 18.45   | 3.374   | 1       | 0.0179 | 1.4108 |
| 4/16/2019 12:18 | 17.9    | 17.7667 | 20.1467 | 18.4917 | 3.3978  | 1       | 0.0232 | 1.4238 |
| 4/16/2019 12:19 | 17.5833 | 17.6167 | 19.7367 | 18.7833 | 3.3887  | 1       | 0.0103 | 1.4285 |
| 4/16/2019 12:20 | 17.2917 | 17.4333 | 19.6517 | 17.6    | 3.42    | 1.025   | 0.0273 | 1.4226 |
| 4/16/2019 12:21 | 16.8833 | 16.5333 | 18.8667 | 16.8833 | 3.4016  | 1.1     | 0.0233 | 1.4369 |
| 4/16/2019 12:22 | 16.275  | 15.8667 | 18.37   | 16.5583 | 3.4247  | 1.1091  | 0.0175 | 1.4784 |
| 4/16/2019 12:23 | 15.75   | 15.4    | 17.9633 | 15.75   | 3.4283  | 1.2     | 0.0275 | 1.5183 |
| 4/16/2019 12:24 | 15.075  | 14.5    | 17.3133 | 15.0083 | 3.4238  | 1.2     | 0.0295 | 1.5178 |
| 4/16/2019 12:25 | 14.65   | 14.85   | 17.2217 | 14.7833 | 3.4414  | 1.2     | 0.0166 | 1.5281 |
| 4/16/2019 12:26 | 14.2083 | 13.9167 | 17      | 14.2833 | 3.4403  | 1.3     | 0.0337 | 1.5413 |
| 4/16/2019 12:27 | 13.7417 | 12.8167 | 15.8817 | 13.7667 | 3.4526  | 1.3     | 0.0322 | 1.5333 |
| 4/16/2019 12:28 | 13.2167 | 13.35   | 15.7017 | 13.2833 | 3.4533  | 1.3636  | 0.0344 | 1.5278 |
| 4/16/2019 12:29 | 12.4833 | 11.8333 | 14.9917 | 11.975  | 3.4348  | 1.4     | 0.036  | 1.5701 |
| 4/16/2019 12:30 | 11.8818 | 11.8333 | 14.765  | 11.8083 | 3.4649  | 1.4364  | 0.027  | 1.6048 |
| 4/16/2019 12:31 | 11.225  | 10.15   | 14.2067 | 11.3917 | 7.8793  | 1.6909  | 0.072  | 1.6353 |
| 4/16/2019 12:32 | 10.2833 | 8.9167  | 16.8517 | 10.0417 | 13.3783 | 2.9     | 0.3469 | 1.6763 |
| 4/16/2019 12:33 | 8.7083  | 6.25    | 14.8067 | 7.15    | 16.3833 | 4.5083  | 0.4079 | 1.672  |
| 4/16/2019 12:34 | 6.1333  | 1.9833  | 19.5583 | 5.0833  | 33.3388 | 39.1833 | 1.6547 | 1.8085 |
| 4/16/2019 12:35 | 3.4333  | -0.1    | 24.4317 | 4.45    | 38.4332 | 60.9091 | 3.107  | 1.9493 |
| 4/16/2019 12:36 | 1.35    | 0.3667  | 24.8967 | 4.225   | 39.363  | 60.4167 | 2.9599 | 1.9698 |
| 4/16/2019 12:37 | 0.5     | 0.2833  | 24.5167 | 4.35    | 39.7067 | 57.1455 | 1.8882 | 1.9656 |
| 4/16/2019 12:38 | 0.3167  | 0.3667  | 24.3567 | 4.0417  | 39.7673 | 55.9364 | 1.7275 | 1.9648 |
| 4/16/2019 12:39 | 0.3     | 0.2     | 23.065  | 3.425   | 38.4929 | 55.66   | 1.665  | 1.9443 |
| 4/16/2019 12:40 | 0.3     | 0.6833  | 22.7417 | 3.6167  | 37.9726 | 53.51   | 1.6312 | 1.9248 |
| 4/16/2019 12:41 | 0.3     | 0.7333  | 22.18   | 3.5167  | 37.1812 | 52.54   | 1.5415 | 1.9071 |
| 4/16/2019 12:42 | 0.35    | 0.1667  | 20.425  | 3.2167  | 34.0006 | 48.0727 | 1.4042 | 1.8834 |
| 4/16/2019 12:43 | 0.4     | -0.1333 | 20.0817 | 3.3417  | 34.5438 | 49.37   | 1.438  | 1.9169 |
| 4/16/2019 12:44 | 0.4     | -0.0333 | 19.8817 | 3.2917  | 34.2323 | 48.79   | 1.4052 | 1.9578 |
| 4/16/2019 12:45 | 0.375   | 0.55    | 19.5133 | 3.025   | 34.0094 | 48.8667 | 1.4042 | 1.9528 |
| 4/16/2019 12:46 | 0.325   | 0.2833  | 18.88   | 3.35    | 33.0423 | 48.16   | 1.3628 | 1.9463 |

|                 |        |         |         |        |         |         |        |        |
|-----------------|--------|---------|---------|--------|---------|---------|--------|--------|
| 4/16/2019 12:47 | 0.3    | 0.1     | 18.1467 | 2.9833 | 31.9572 | 48.0091 | 1.2962 | 1.9696 |
| 4/16/2019 12:48 | 0.375  | 0.7     | 18.1183 | 3.15   | 32.2629 | 47.8833 | 1.3492 | 1.9933 |
| 4/16/2019 12:49 | 0.3667 | 0.0833  | 18.2017 | 2.975  | 32.0735 | 47.7273 | 1.3277 | 1.9875 |
| 4/16/2019 12:50 | 0.2917 | -0.4    | 18.7533 | 2.625  | 33.3076 | 47.75   | 1.3947 | 1.9635 |
| 4/16/2019 12:51 | 0.2    | -0.7    | 18.7833 | 2.9    | 33.5938 | 47.8    | 1.4075 | 2.0086 |
| 4/16/2019 12:52 | 0.1417 | -0.15   | 18.8283 | 2.8    | 32.8888 | 47.8    | 1.3738 | 2.0226 |
| 4/16/2019 12:53 | 0.1    | 0.3833  | 18.34   | 2.4167 | 32.9696 | 47.7    | 1.3938 | 2.0312 |
| 4/16/2019 12:54 | 0.1583 | 0.2333  | 17.7133 | 2.3833 | 31.5888 | 47.5    | 1.3323 | 2.026  |
| 4/16/2019 12:55 | 0.2583 | 0.4833  | 16.54   | 2.475  | 30.4208 | 47.2091 | 1.2742 | 1.995  |
| 4/16/2019 12:56 | 0.3833 | 0.0667  | 16.5283 | 2.625  | 29.8351 | 46.8727 | 1.2728 | 1.9668 |
| 4/16/2019 12:57 | 0.4    | -0.5833 | 16.4817 | 2.7    | 30.2338 | 46.5417 | 1.2805 | 1.9803 |
| 4/16/2019 12:58 | 0.3167 | -0.4    | 15.58   | 1.825  | 29.2059 | 46.1    | 1.2438 | 1.9817 |
| 4/16/2019 12:59 | 0.2667 | -0.0333 | 15.9083 | 2.3833 | 29.0187 | 45.7727 | 1.2553 | 1.9796 |
| 4/16/2019 13:00 | 0.2333 | 0.2833  | 15.5292 | 1.725  | 28.5638 | 45.5    | 1.218  | 1.9952 |
| 4/16/2019 13:01 | 0.2    | 0.2     | 15.2942 | 2.1583 | 28.079  | 45.0583 | 1.2127 | 2.0158 |
| 4/16/2019 13:02 | 0.2    | -0.1167 | 15.6008 | 1.9667 | 28.079  | 44.63   | 1.254  | 2.0496 |
| 4/16/2019 13:03 | 0.2    | -0.3667 | 15.6733 | 1.7333 | 28.2152 | 44.0889 | 1.2213 | 2.0163 |
| 4/16/2019 13:04 | 0.2    | 0.3167  | 15.7608 | 1.675  | 28.9963 | 43.6818 | 1.276  | 2.0277 |
| 4/16/2019 13:05 | 0.2083 | -0.25   | 15.9217 | 1.9583 | 29.0863 | 43.3727 | 1.2693 | 2.0268 |
| 4/16/2019 13:06 | 0.3    | 0.2     | 15.5775 | 1.875  | 28.2014 | 43.0667 | 1.235  | 2.0408 |
| 4/16/2019 13:07 | 0.3167 | -0.2833 | 14.9475 | 2.1083 | 27.9298 | 42.8455 | 1.2335 | 2.0724 |
| 4/16/2019 13:08 | 0.4    | 1.1833  | 15.0342 | 1.775  | 27.1157 | 42.6455 | 1.1905 | 2.0783 |
| 4/16/2019 13:09 | 0.4    | -0.2333 | 14.6033 | 1.8167 | 26.4883 | 42.4273 | 1.183  | 2.0601 |
| 4/16/2019 13:10 | 0.5    | -0.0167 | 13.9725 | 1.7083 | 25.9844 | 42.2    | 1.1603 | 2.0498 |
| 4/16/2019 13:11 | 0.5    | -0.1833 | 13.7583 | 1.7833 | 25.5629 | 41.9091 | 1.1515 | 2.0697 |
| 4/16/2019 13:12 | 0.5    | -0.4667 | 13.4858 | 1.9    | 24.8138 | 41.4727 | 1.1363 | 2.0489 |
| 4/16/2019 13:13 | 0.425  | -0.4167 | 13.5942 | 1.7333 | 24.9391 | 41.1818 | 1.1318 | 2.0738 |
| 4/16/2019 13:14 | 0.4    | -0.0667 | 13.6817 | 1.6917 | 25.25   | 40.9818 | 1.1543 | 2.1096 |
| 4/16/2019 13:15 | 0.3917 | -0.6167 | 13.3292 | 1.6167 | 24.7648 | 40.65   | 1.1417 | 2.0983 |
| 4/16/2019 13:16 | 0.375  | 0.05    | 13.0333 | 1.55   | 24.265  | 40.1    | 1.1032 | 2.0884 |
| 4/16/2019 13:17 | 0.3917 | -0.3    | 13.7908 | 1.525  | 25.2228 | 39.7    | 1.1583 | 2.1188 |
| 4/16/2019 13:18 | 0.3417 | -0.2833 | 13.9708 | 1.4167 | 25.6447 | 39.4    | 1.1738 | 2.1504 |
| 4/16/2019 13:19 | 0.3    | 0.0333  | 13.815  | 1.1    | 25.2112 | 39.1364 | 1.1562 | 2.1428 |
| 4/16/2019 13:20 | 0.3    | -0.2667 | 13.685  | 1.7417 | 25.0035 | 38.9083 | 1.1612 | 2.1547 |
| 4/16/2019 13:21 | 0.2917 | -0.65   | 13.5533 | 1.2167 | 24.5526 | 38.6636 | 1.1302 | 2.1119 |
| 4/16/2019 13:22 | 0.2833 | -0.2167 | 12.9008 | 1.225  | 23.6883 | 38.3182 | 1.1028 | 2.0732 |
| 4/16/2019 13:23 | 0.3    | -0.2167 | 12.3733 | 1.125  | 22.7563 | 38      | 1.0728 | 2.067  |
| 4/16/2019 13:24 | 0.3    | 0.4667  | 12.2883 | 1.625  | 22.6946 | 37.6583 | 1.0665 | 2.0722 |
| 4/16/2019 13:25 | 0.35   | -0.7833 | 11.6717 | 1.1833 | 22.0341 | 37.5    | 1.0503 | 2.0828 |
| 4/16/2019 13:26 | 0.3    | 0.6167  | 11.5167 | 1.425  | 21.5902 | 37.0417 | 1.0317 | 2.0948 |
| 4/16/2019 13:27 | 0.25   | 0.3333  | 12.0025 | 1.075  | 22.0102 | 36.6818 | 1.0508 | 2.1084 |
| 4/16/2019 13:28 | 0.2    | 0.2333  | 12.0983 | 0.925  | 22.5625 | 36.5818 | 1.078  | 2.1076 |
| 4/16/2019 13:29 | 0.2    | 0.3833  | 11.4858 | 1.1833 | 21.4606 | 36.3    | 1.0106 | 2.1195 |
| 4/16/2019 13:30 | 0.2    | 0.3167  | 11.6575 | 1.2417 | 21.22   | 35.825  | 1.0207 | 2.1173 |
| 4/16/2019 13:31 | 0.2    | 0.4333  | 11.9092 | 1.025  | 21.6653 | 35.5333 | 1.0437 | 2.1711 |
| 4/16/2019 13:32 | 0.2    | 0.1     | 11.8317 | 1.5667 | 21.2226 | 35.0167 | 1.015  | 2.179  |
| 4/16/2019 13:33 | 0.1417 | 0.3667  | 11.6642 | 1.3417 | 21.275  | 34.6364 | 1.0293 | 2.169  |

|                 |         |         |         |         |         |         |        |        |
|-----------------|---------|---------|---------|---------|---------|---------|--------|--------|
| 4/16/2019 13:34 | 0.1417  | -0.1833 | 11.6692 | 1.2917  | 21.7151 | 34.475  | 1.0468 | 2.163  |
| 4/16/2019 13:35 | 0.125   | -0.3333 | 11.7392 | 1.6417  | 21.3187 | 34.4    | 1.035  | 2.1522 |
| 4/16/2019 13:36 | 0.1833  | 0.2     | 11.3125 | 0.6583  | 21.1154 | 34.325  | 1.0355 | 2.137  |
| 4/16/2019 13:37 | 0.25    | 0       | 11.3417 | 1.1833  | 20.6219 | 34.1    | 1.0028 | 2.1108 |
| 4/16/2019 13:38 | 0.3167  | 0.0667  | 11.0075 | 1.5083  | 20.3342 | 33.95   | 1.0044 | 2.1353 |
| 4/16/2019 13:39 | 0.325   | 0.1667  | 11.4475 | 1.2583  | 20.1562 | 33.86   | 1.0022 | 2.1194 |
| 4/16/2019 13:40 | 0.3182  | -0.35   | 10.9392 | 0.3333  | 19.7806 | 33.6583 | 0.9768 | 2.1501 |
| 4/16/2019 13:41 | 0.4     | -0.0167 | 10.5342 | 0.9917  | 19.1128 | 33.3222 | 0.9668 | 2.1285 |
| 4/16/2019 13:42 | 0.4167  | -0.1833 | 10.1188 | 0.725   | 18.6992 | 33.0917 | 0.9224 | 2.0654 |
| 4/16/2019 13:43 | 0.5     | -0.1167 | 10.1338 | 1.3667  | 18.5808 | 32.6111 | 0.9453 | 2.0886 |
| 4/16/2019 13:44 | 0.5     | -0.4667 | 10.1686 | 1.0667  | 18.4328 | 32.3091 | 0.9312 | 2.1278 |
| 4/16/2019 13:45 | 0.425   | -0.4667 | 10.4825 | 1.2167  | 19.3113 | 32.0455 | 0.9665 | 2.1823 |
| 4/16/2019 13:46 | 0.375   | -0.15   | 10.7783 | 0.7333  | 19.3058 | 31.8583 | 0.9824 | 2.181  |
| 4/16/2019 13:47 | 0.3     | -0.1833 | 10.8092 | 1.125   | 19.4478 | 31.67   | 0.9801 | 2.1979 |
| 4/16/2019 13:48 | 0.2333  | -0.3667 | 11.1233 | 0.875   | 19.4762 | 31.4917 | 0.9933 | 2.1758 |
| 4/16/2019 13:49 | 0.2     | 0.45    | 10.6867 | 0.8333  | 19.1705 | 31.39   | 0.9852 | 2.1636 |
| 4/16/2019 13:50 | 0.2     | -0.0833 | 10.3733 | 1.125   | 18.4999 | 31.175  | 0.9343 | 2.1771 |
| 4/16/2019 13:51 | 0.2917  | -0.2167 | 10.5292 | 1.1167  | 18.0823 | 30.93   | 0.9327 | 2.2007 |
| 4/16/2019 13:52 | 0.3083  | 0.35    | 10.3659 | 0.8917  | 17.7829 | 30.65   | 0.9218 | 2.2031 |
| 4/16/2019 13:53 | 0.3917  | 0.3667  | 9.6837  | 0.9833  | 17.1105 | 30.41   | 0.8824 | 2.1576 |
| 4/16/2019 13:54 | 0.4     | 0.5833  | 9.8814  | 1.4667  | 16.7348 | 30.1273 | 0.8734 | 2.125  |
| 4/16/2019 13:55 | 0.7417  | 1.3667  | 10.2975 | 2.9583  | 15.4979 | 29.825  | 0.7772 | 2.0636 |
| 4/16/2019 13:56 | 1.75    | 4.2833  | 10.9133 | 4.9083  | 14.6786 | 29.3091 | 0.7083 | 1.9992 |
| 4/16/2019 13:57 | 3.5083  | 7.15    | 13.3067 | 7.6667  | 13.936  | 28.2    | 0.5807 | 1.9458 |
| 4/16/2019 13:58 | 5.9083  | 10.1667 | 14.8625 | 10.9667 | 13.3833 | 26.6583 | 0.4729 | 1.8712 |
| 4/16/2019 13:59 | 8.3333  | 12.3833 | 16.0767 | 12.9333 | 12.6673 | 24.66   |        | 1.7956 |
| 4/16/2019 14:00 | 10.3333 | 12.5    | 16.7467 | 13.925  | 12.4258 | 22.65   |        | 1.7584 |
| 4/16/2019 14:01 | 11.4917 | 13.35   | 17.0617 | 14.1    | 12.1867 | 20.4455 |        | 1.7071 |
| 4/16/2019 14:02 | 12.0583 | 14.1667 | 17.4375 | 13.625  | 11.292  | 18.5    |        | 1.67   |
| 4/16/2019 14:03 | 12.675  | 14.95   | 18.1425 | 15.85   | 11.292  | 16.575  |        | 1.6341 |
| 4/16/2019 14:04 | 13.6083 | 15.5333 | 18.4042 | 16.4917 | 10.9968 | 14.4833 |        | 1.5903 |
| 4/16/2019 14:05 | 14.3583 | 15.5    | 18.5167 | 16.5417 | 10.8906 | 12.4667 |        | 1.58   |
| 4/16/2019 14:06 | 15.2417 | 17.6833 | 19.6992 | 18.4083 | 9.8483  | 10.2917 |        | 1.5609 |
| 4/16/2019 14:07 | 15.8    | 17.1667 | 20.0308 | 18.125  | 9.2479  | 8.44    |        | 1.8953 |
| 4/16/2019 14:08 | 16.8417 | 19.9    | 21.2367 | 20.825  | 8.2677  | 6.6364  |        | 2.2143 |
| 4/16/2019 14:09 | 18.05   | 20.85   | 22.8908 | 21.55   | 7.1358  | 5.24    |        | 1.8578 |
| 4/16/2019 14:10 | 18.8909 | 20.7167 | 22.4183 | 21      | 6.9991  | 4.27    |        | 1.7063 |
| 4/16/2019 14:11 | 19.6583 | 20.9833 | 22.9458 | 21.775  | 6.4513  | 3.6636  |        | 1.6123 |
| 4/16/2019 14:12 | 19.975  | 21.9333 | 23.61   | 22.275  | 6.2135  | 3.1545  |        | 1.6138 |
| 4/16/2019 14:13 | 20.2917 | 21.5333 | 22.3758 | 21.3083 | 6.0229  | 2.7833  |        | 1.5644 |
| 4/16/2019 14:14 | 20.65   | 22.1333 | 23.4317 | 22.6417 | 5.709   | 2.4455  |        | 1.5517 |
| 4/16/2019 14:15 | 21.1083 | 23.25   | 24.93   | 23.2667 | 5.27    | 2.1083  |        | 1.5153 |
| 4/16/2019 14:16 | 21.875  | 23.0333 | 25.3908 | 23.7833 | 5.0455  | 1.9091  |        | 1.4868 |
| 4/16/2019 14:17 | 22.1333 | 23.4667 | 24.4492 | 23.7    | 4.7432  | 1.6833  |        | 1.4702 |
| 4/16/2019 14:18 | 22.3167 | 22.9667 | 24.3525 | 24.2667 | 4.3919  | 1.5583  |        | 1.4588 |
| 4/16/2019 14:19 | 22.8083 | 25.5333 | 26.2267 | 26.65   | 3.9634  | 1.4455  |        | 1.4456 |
| 4/16/2019 14:20 | 23.4917 | 24.2    | 26.1325 | 24.8    | 3.8253  | 1.3583  |        | 1.4305 |

|                 |         |         |         |         |        |        |        |
|-----------------|---------|---------|---------|---------|--------|--------|--------|
| 4/16/2019 14:21 | 23.6417 | 24.2    | 25.39   | 24.5417 | 4.0018 | 1.3    | 1.4447 |
| 4/16/2019 14:22 | 23.5583 | 23.5667 | 25.2658 | 24.6417 | 3.7161 | 1.2455 | 1.4453 |
| 4/16/2019 14:23 | 22.8833 | 23.5667 | 24.3667 | 23.1917 | 4.2149 | 1.2    | 1.435  |
| 4/16/2019 14:24 | 22.6917 | 23.6667 | 24.7017 | 23.7833 | 4.2585 | 1.18   | 1.4441 |
| 4/16/2019 14:25 | 22.6417 | 24.7667 | 25.825  | 26.05   | 4.0391 | 1.1    | 1.437  |
| 4/16/2019 14:26 | 23.6583 | 26.7167 | 27.3308 | 27.0583 | 3.4763 | 1.0833 | 1.4204 |
| 4/16/2019 14:27 | 24.4417 | 26.1167 | 26.8658 | 26.5    | 3.2608 | 1      | 1.4015 |
| 4/16/2019 14:28 | 25.0833 | 26.8    | 27.4758 | 27.0583 | 3.1135 | 1.025  | 1.3919 |
| 4/16/2019 14:29 | 25.2333 | 26.7    | 27.6217 | 27.3167 | 3.0221 | 1      | 1.4094 |
| 4/16/2019 14:30 | 25.5    | 26.7167 | 27.9783 | 26.775  | 2.9012 | 1      | 1.4013 |
| 4/16/2019 14:31 | 25.5667 | 26.45   | 27.6167 | 26.8833 | 2.8705 | 1      | 1.3748 |
| 4/16/2019 14:32 | 25.6    | 25.8667 | 27.5217 | 26.25   | 2.7648 | 1      | 1.3643 |
| 4/16/2019 14:33 | 25.5167 | 25.6833 | 27.1017 | 25.8583 | 2.7325 | 1      | 1.3538 |
| 4/16/2019 14:34 | 25.0417 | 24.7    | 25.6733 | 24.9833 | 2.9305 | 1      | 1.3663 |
| 4/16/2019 14:35 | 24.8167 | 26.4667 | 27.5233 | 27.2167 | 3.0229 | 1      | 1.3588 |
| 4/16/2019 14:36 | 24.6333 | 25.5167 | 26.76   | 25.675  | 3.0133 | 1      | 1.3644 |
| 4/16/2019 14:37 | 24.6083 | 25.2833 | 25.8117 | 25.5667 | 2.9516 | 1      | 1.3882 |
| 4/16/2019 14:38 | 24.1917 | 25.7833 | 26.1783 | 26.275  | 2.9097 | 1      | 1.3983 |
| 4/16/2019 14:39 | 24.65   | 26.8    | 28.3983 | 26.925  | 2.4978 | 1      | 1.3701 |
| 4/16/2019 14:40 | 24.9833 | 25.6    | 27.1567 | 25.6583 | 2.6405 | 0.9545 | 1.3907 |
| 4/16/2019 14:41 | 25.5083 | 27.0667 | 26.8    | 26.4833 | 2.5119 | 0.9    | 1.3742 |
| 4/16/2019 14:42 | 25.3917 | 26.3333 | 27.7133 | 27.2583 | 2.4119 | 0.9    | 1.3693 |
| 4/16/2019 14:43 | 25.5083 | 26.3833 | 27.7883 | 26.6667 | 2.3376 | 0.9    | 1.3604 |
| 4/16/2019 14:44 | 25.3417 | 25.6667 | 27.445  | 26.9333 | 2.4038 | 0.9    | 1.3631 |
| 4/16/2019 14:45 | 25.0167 | 25.0167 | 26.8467 | 26.0417 | 2.5727 | 0.85   | 1.3555 |
| 4/16/2019 14:46 | 24.8167 | 25.6667 | 26.695  | 25.3667 | 2.5577 | 0.8    | 1.3451 |
| 4/16/2019 14:47 | 24.925  | 26.75   | 27.715  | 26.925  | 2.5813 | 0.8    | 1.3417 |
| 4/16/2019 14:48 | 25.1167 | 25.8    | 27.3983 | 26.4833 | 2.5462 | 0.8    | 1.3658 |
| 4/16/2019 14:49 | 25.2667 | 26.5    | 26.8283 | 26.4583 | 2.7408 | 0.8    | 1.3596 |
| 4/16/2019 14:50 | 25.0636 | 25.4667 | 26.2033 | 25.825  | 2.7174 | 0.74   | 1.3632 |
| 4/16/2019 14:51 | 25.1083 | 26      | 26.735  | 26.4083 | 2.5093 | 0.8    | 1.3263 |
| 4/16/2019 14:52 | 25.2583 | 26.9167 | 28.0267 | 27.5583 | 2.4238 | 0.8    | 1.3088 |
| 4/16/2019 14:53 | 25.9333 | 27.7833 | 28.275  | 28.2417 | 2.3089 | 0.8    | 1.3218 |
| 4/16/2019 14:54 | 26.4    | 26.8333 | 27.9017 | 28.3083 | 2.3247 | 0.7    | 1.3389 |
| 4/16/2019 14:55 | 26.6917 | 27.3667 | 28.2333 | 27.6167 | 2.3943 | 0.7    | 1.375  |
| 4/16/2019 14:56 | 26.5083 | 27.0833 | 28.3817 | 27.225  | 2.3729 | 0.7    | 1.3543 |
| 4/16/2019 14:57 | 26.2333 | 26.7    | 27.775  | 26.4833 | 2.2998 | 0.7    | 1.3402 |
| 4/16/2019 14:58 | 25.9917 | 26      | 27.4867 | 26.7667 | 2.327  | 0.7    | 1.3243 |
| 4/16/2019 14:59 | 25.8083 | 26.2833 | 27.7317 | 27      | 2.3304 | 0.7    | 1.3215 |
| 4/16/2019 15:00 | 25.7917 | 26.6333 | 27.8683 | 27.075  | 2.3403 | 0.7    | 1.3257 |
| 4/16/2019 15:01 | 25.8167 | 26.7667 | 27.8983 | 27.2333 | 2.3624 | 0.7    | 1.3493 |
| 4/16/2019 15:02 | 25.7417 | 27      | 27.4933 | 26.75   | 2.2565 | 0.7364 | 1.354  |
| 4/16/2019 15:03 | 25.7083 | 26.95   | 27.8717 | 27.9167 | 2.3094 | 0.8    | 1.3073 |
| 4/16/2019 15:04 | 25.8    | 27      | 27.8783 | 27.525  | 2.31   | 0.8    | 1.3051 |
| 4/16/2019 15:05 | 26.2167 | 28.0167 | 28.4933 | 28.7083 | 2.1603 | 0.8    | 1.2899 |
| 4/16/2019 15:06 | 26.4417 | 26.15   | 27.9083 | 26.9083 | 1.9961 | 0.8    | 1.2853 |
| 4/16/2019 15:07 | 26.3167 | 25.9833 | 27.6167 | 27.125  | 2.0471 | 0.8    | 1.3094 |

|                 |         |         |         |         |        |        |               |
|-----------------|---------|---------|---------|---------|--------|--------|---------------|
| 4/16/2019 15:08 | 25.775  | 25.8667 | 26.97   | 26.025  | 2.0523 | 0.8    | 1.3574        |
| 4/16/2019 15:09 | 25.1583 | 25.6333 | 26.145  | 25.9917 | 2.0824 | 0.8    | 1.3722        |
| 4/16/2019 15:10 | 24.6333 | 25.0833 | 25.9033 | 24.9    | 2.1018 | 0.825  | 1.371         |
| 4/16/2019 15:11 | 24.025  | 23.8667 | 25.0017 | 24.075  | 2.1301 | 0.8455 | 1.3553        |
| 4/16/2019 15:12 | 23.3917 | 22.8167 | 24.6967 | 23.6333 | 2.1638 | 0.9    | 1.415         |
| 4/16/2019 15:13 | 22.65   | 21.8833 | 23.82   | 23.525  | 2.205  | 0.9    | 1.4261        |
| 4/16/2019 15:14 | 22      | 22.05   | 23.47   | 22.3083 | 2.2124 | 0.9556 | 1.4113        |
| 4/16/2019 15:15 | 21.4667 | 21.8333 | 23.0967 | 21.575  | 2.2386 | 1      | 1.404         |
| 4/16/2019 15:16 | 20.9333 | 20.7    | 22.485  | 21.2667 | 2.2786 | 1      | 1.4049        |
| 4/16/2019 15:17 | 20.4167 | 19.8833 | 22.325  | 21.1333 | 2.2748 | 1.0909 | 1.4212        |
| 4/16/2019 15:18 | 19.9    | 19.25   | 21.2017 | 20.4167 | 2.3047 | 1.1455 | 1.4566        |
| 4/16/2019 15:19 | 19.3583 | 19.0333 | 21.3783 | 19.375  | 2.3298 | 1.2    | 1.4814        |
| 4/16/2019 15:20 | 18.8333 | 18.7833 | 20.6333 | 19.1167 | 2.3611 | 1.23   | 1.4828        |
| 4/16/2019 15:21 | 18.3833 | 18.2167 | 20.2867 | 18.45   | 2.3817 | 1.3    | 1.4518        |
| 4/16/2019 15:22 | 17.875  | 17.9167 | 18.88   | 17.2833 | 2.3956 | 1.34   | 1.4718        |
| 4/16/2019 15:23 | 17.275  | 17.0833 | 19.1517 | 17.225  | 2.4323 | 1.4    | 1.4784        |
| 4/16/2019 15:24 | 16.525  | 15.7167 | 17.925  | 16.2417 | 2.4618 | 1.4083 | 1.4773        |
| 4/16/2019 15:25 | 15.9667 | 15.2833 | 18.1567 | 15.7333 | 2.4876 | 1.5    | 1.4908        |
| 4/16/2019 15:26 | 15.2667 | 13.8167 | 16.77   | 14.0167 | 2.5658 | 1.5583 | 1.5069        |
| 4/16/2019 15:27 | 14.6583 | 14.05   | 16.5633 | 13.9167 | 2.5579 | 1.6    | 1.531         |
| 4/16/2019 15:28 | 14.075  | 13.35   | 16.4567 | 13.875  | 2.5673 | 1.6    | 1.5094        |
| 4/16/2019 15:29 | 13.6917 | 13.45   | 15.9783 | 13.6583 | 2.6043 | 1.6909 | 1.5197        |
| 4/16/2019 15:30 | 13.3667 | 12.6667 | 15.3733 | 13.4667 | 2.5918 | 1.7    | 1.5323        |
| 4/16/2019 15:31 | 12.8667 | 12.1167 | 15.3133 | 12.7    | 2.6292 | 1.7    | 1.5294        |
| 4/16/2019 15:32 | 12.5083 | 12.0333 | 14.8617 | 12.1    | 2.6222 | 1.8    | 1.5196        |
| 4/16/2019 15:33 | 12.0667 | 11.5333 | 14.5767 | 12.1917 | 2.6449 | 1.8    | 1.5268        |
| 4/16/2019 15:34 | 11.6583 | 11.0667 | 14.3317 | 11.8083 | 2.6683 | 1.8    | 1.541         |
| 4/16/2019 15:35 | 11.3    | 10.0833 | 13.7567 | 10.8667 | 2.6689 | 1.8    | 1.5646        |
| 4/16/2019 15:36 | 10.9    | 10.6167 | 13.6667 | 10.6917 | 2.6831 | 1.8    | 1.5805        |
| 4/16/2019 15:37 | 10.875  | 10.9667 | 13.9717 | 11.1417 | 2.6367 | 1.8273 | 1.591         |
| 4/16/2019 15:38 | 10.7417 | 9.7667  | 13.865  | 9.9333  | 2.6776 | 1.8    | 1.5924        |
| 4/16/2019 15:39 | 10.6083 | 9.15    | 14.0333 | 9.4167  | 2.7096 | 1.8182 | 1.5933        |
| 4/16/2019 15:40 | 10.325  | 9.4667  | 12.185  | 10.1167 | 2.7174 | 1.88   | 0.2147 1.588  |
| 4/16/2019 15:41 | 10.15   | 10.05   | 12.8683 | 9.3167  | 2.6888 | 1.9    | 0.2184 1.6293 |
| 4/16/2019 15:42 | 9.825   | 8.8167  | 12.2867 | 9.2583  | 2.7389 | 1.9    | 0.2101 1.5973 |
| 4/16/2019 15:43 | 9.4167  | 8.8     | 11.9167 | 8.7083  | 2.7491 | 1.9    | 0.2233 1.5774 |
| 4/16/2019 15:44 | 8.9833  | 9.0333  | 11.6133 | 9.2333  | 2.7632 | 1.9    | 0.2143 1.5925 |
| 4/16/2019 15:45 | 8.9     | 9.15    | 11.8117 | 9.2     | 2.7344 | 1.91   | 0.2232 1.6045 |
| 4/16/2019 15:46 | 8.9833  | 8.9333  | 11.8133 | 8.8917  | 2.7177 | 2      | 0.2309 1.5974 |
| 4/16/2019 15:47 | 8.9917  | 8.45    | 11.72   | 8.675   | 2.6953 | 2      | 0.2199 1.6071 |
| 4/16/2019 15:48 | 8.8917  | 8.45    | 11.5433 | 8.675   | 2.7186 | 2.03   | 0.2277 1.609  |
| 4/16/2019 15:49 | 8.7917  | 7.95    | 11.4717 | 8.55    | 2.6968 | 2.1    | 0.2323 1.6063 |
| 4/16/2019 15:50 | 8.7     | 7.45    | 10.9517 | 8       | 2.7056 | 2.1    | 0.2225 1.6342 |
| 4/16/2019 15:51 | 8.5667  | 7.2833  | 10.98   | 7.7917  | 2.6988 | 2.1455 | 0.228 1.6583  |
| 4/16/2019 15:52 | 8.2833  | 7.7667  | 10.53   | 7.7583  | 2.7088 | 2.2    | 0.2181 1.645  |
| 4/16/2019 15:53 | 8.1083  | 7.0167  | 10.9083 | 7.6667  | 2.6983 | 2.2    | 0.227 1.6383  |
| 4/16/2019 15:54 | 7.95    | 7.8     | 10.6767 | 7.525   | 2.6856 | 2.2    | 0.2232 1.6152 |

|                 |        |        |         |        |        |        |        |        |
|-----------------|--------|--------|---------|--------|--------|--------|--------|--------|
| 4/16/2019 15:55 | 7.8833 | 7.3167 | 10.845  | 7.7833 | 2.7024 | 2.2364 | 0.22   | 1.6311 |
| 4/16/2019 15:56 | 7.7083 | 6.5333 | 10.445  | 6.975  | 2.712  | 2.3    | 0.2288 | 1.5944 |
| 4/16/2019 15:57 | 7.6083 | 7.35   | 9.9177  | 6.9167 | 2.6858 | 2.3    | 0.2254 | 1.6066 |
| 4/16/2019 15:58 | 7.5583 | 7.2167 | 10.3105 | 7.0167 | 2.6783 | 2.4    | 0.219  | 1.6442 |
| 4/16/2019 15:59 | 7.3917 | 6.8167 | 9.9328  | 6.575  | 2.7118 | 2.4    | 0.2315 | 1.6313 |
| 4/16/2019 16:00 | 7.225  | 7.25   | 9.7285  | 6.8583 | 2.6957 | 2.3917 | 0.2251 | 1.6106 |
| 4/16/2019 16:01 | 7.0583 | 6.6167 | 10.0749 | 6.725  | 2.6976 | 2.3    | 0.2211 | 1.6455 |
| 4/16/2019 16:02 | 7      | 5.9    | 9.7222  | 6.2333 | 2.7137 | 2.3273 | 0.2248 | 1.6568 |
| 4/16/2019 16:03 | 6.9    | 5.8833 | 9.7613  | 7.2333 | 2.6947 | 2.4    | 0.2132 | 1.6428 |
| 4/16/2019 16:04 | 6.8417 | 6.3167 | 9.5123  | 6.1417 | 2.6861 | 2.4    | 0.2234 | 1.6423 |
| 4/16/2019 16:05 | 6.775  | 6.45   | 9.6549  | 6.275  | 2.685  | 2.4    | 0.2207 | 1.6221 |
| 4/16/2019 16:06 | 6.5917 | 5.4167 | 9.6217  | 6.125  | 2.6888 | 2.4    | 0.2194 | 1.6476 |
| 4/16/2019 16:07 | 6.325  | 5.2167 | 9.5522  | 5.6167 | 2.6733 | 2.43   | 0.2335 | 1.6557 |
| 4/16/2019 16:08 | 6.1167 | 6.1    | 9.2533  | 6.475  | 2.6823 | 2.4    | 0.2105 | 1.6402 |
| 4/16/2019 16:09 | 5.9833 | 5.5    | 9.1489  | 5.6417 | 2.6831 | 2.4    | 0.2287 | 1.6415 |
| 4/16/2019 16:10 | 5.8417 | 5.1667 | 9.2211  | 5.25   | 2.6949 | 2.4    | 0.2327 | 1.6366 |
| 4/16/2019 16:11 | 5.7333 | 4.9167 | 8.8378  | 5.4583 | 2.6943 | 2.4    | 0.2172 | 1.6423 |
| 4/16/2019 16:12 | 5.5583 | 5.4667 | 8.8398  | 5.8167 | 2.6861 | 2.4364 | 0.2312 | 1.6418 |
| 4/16/2019 16:13 | 5.45   | 4.95   | 8.8051  | 5.7833 | 2.6816 | 2.5    | 0.2216 | 1.6434 |
| 4/16/2019 16:14 | 5.2667 | 5.0833 | 8.746   | 4.8    | 2.6941 | 2.5    | 0.2205 | 1.6556 |
| 4/16/2019 16:15 | 5.1333 | 4.9167 | 8.4103  | 4.65   | 2.6838 | 2.5    | 0.2273 | 1.6713 |
| 4/16/2019 16:16 | 4.975  | 4.9    | 8.4273  | 4.6083 | 2.6747 | 2.5    | 0.2152 | 1.6842 |
| 4/16/2019 16:17 | 4.875  | 4.6167 | 8.2182  | 4.425  | 2.6783 | 2.5    | 0.2241 | 1.6538 |
| 4/16/2019 16:18 | 4.8    | 4.05   | 7.9262  | 4.4417 | 2.6923 | 2.5    | 0.2237 | 1.6756 |
| 4/16/2019 16:19 | 4.65   | 5      | 7.94    | 4.6333 | 2.7047 | 2.5    | 0.2135 | 1.6762 |
| 4/16/2019 16:20 | 4.55   | 4.1833 | 8.0345  | 4.6583 | 2.6938 | 2.5    | 0.2304 | 1.6663 |
| 4/16/2019 16:21 | 4.4583 | 4.05   | 7.8694  | 4.3917 | 2.7147 | 2.51   | 0.22   | 1.6878 |
| 4/16/2019 16:22 | 4.4    | 4.5833 | 8.0644  | 4.4667 | 2.6893 | 2.6    | 0.2354 | 1.6938 |
| 4/16/2019 16:23 | 4.35   | 4.2833 | 7.7147  | 4.3333 | 2.7061 | 2.6    | 0.2279 | 1.6555 |
| 4/16/2019 16:24 | 4.3    | 3.75   | 7.5718  | 3.8917 | 2.694  | 2.55   | 0.2182 | 1.6413 |
| 4/16/2019 16:25 | 4.2667 | 3.5    | 7.5804  | 3.875  | 2.7125 | 2.5818 | 0.2333 | 1.6356 |
| 4/16/2019 16:26 | 4.175  | 3.5667 | 7.2293  | 3.3583 | 2.7298 | 2.6    | 0.223  | 1.6553 |
| 4/16/2019 16:27 | 4.0833 | 3.5833 | 7.4504  | 3.0917 | 2.7119 | 2.6    | 0.2244 | 1.668  |
| 4/16/2019 16:28 | 3.9667 | 3.6167 | 7.3261  | 3.2083 | 2.7312 | 2.6333 | 0.2337 | 1.6963 |
| 4/16/2019 16:29 | 3.9    | 3.4667 | 7.2539  | 4.3167 | 2.7153 | 2.7    | 0.2193 | 1.7033 |
| 4/16/2019 16:30 | 3.8818 | 2.9333 | 7.2072  | 3.8667 | 2.7278 | 2.7    | 0.2326 | 1.7026 |
| 4/16/2019 16:31 | 3.8583 | 3.95   | 7.0978  | 3.875  | 2.7268 | 2.7    | 0.2265 | 1.6982 |
| 4/16/2019 16:32 | 3.8333 | 3.2833 | 7.3061  | 3.9667 | 2.7072 | 2.7    | 0.2189 | 1.6999 |
| 4/16/2019 16:33 | 3.7917 | 3.1    | 7.0903  | 3.3583 | 2.7263 | 2.7727 | 0.2313 | 1.7325 |
| 4/16/2019 16:34 | 3.75   | 3.4833 | 7.0615  | 3.2083 | 2.7205 | 2.8    | 0.227  | 1.724  |
| 4/16/2019 16:35 | 3.6833 | 2.4667 | 6.9813  | 3.8417 | 2.7194 | 2.8    | 0.2232 | 1.7013 |
| 4/16/2019 16:36 | 3.6    | 3.3    | 6.9445  | 3.0333 | 2.7111 | 2.8    | 0.2306 | 1.6963 |
| 4/16/2019 16:37 | 3.5667 | 2.2667 | 6.764   | 2.9667 | 2.7044 | 2.8    | 0.2213 | 1.6801 |
| 4/16/2019 16:38 | 3.525  | 3.2667 | 6.9463  | 3.2583 | 2.7313 | 2.8    | 0.2203 | 1.6678 |
| 4/16/2019 16:39 | 3.5    | 3.3    | 6.8475  | 2.8583 | 2.7105 | 2.8    | 0.2245 | 1.703  |
| 4/16/2019 16:40 | 3.4    | 3.6    | 6.6844  | 2.4333 | 2.7122 | 2.8    | 0.2113 | 1.7323 |
| 4/16/2019 16:41 | 3.325  | 3.4167 | 6.8153  | 2.7667 | 2.7213 | 2.8    | 0.2228 | 1.6929 |

|                 |        |        |        |        |        |        |        |        |
|-----------------|--------|--------|--------|--------|--------|--------|--------|--------|
| 4/16/2019 16:42 | 3.3    | 2.8333 | 6.4712 | 2.7    | 2.7166 | 2.8    | 0.2232 | 1.654  |
| 4/16/2019 16:43 | 3.2917 | 2.7    | 6.6728 | 2.6083 | 2.7028 | 2.8    | 0.2146 | 1.6889 |
| 4/16/2019 16:44 | 3.225  | 2.8667 | 6.4853 | 2.5083 | 2.6888 | 2.8    | 0.2239 | 1.7019 |
| 4/16/2019 16:45 | 3.2083 | 2.55   | 6.4986 | 2.8833 | 2.7025 | 2.8    | 0.2147 | 1.6993 |
| 4/16/2019 16:46 | 3.1083 | 1.8833 | 6.575  | 2.8917 | 2.6989 | 2.8    | 0.2212 | 1.6963 |
| 4/16/2019 16:47 | 3.1    | 2.6667 | 6.6319 | 2.8833 | 2.7197 | 2.8    | 0.2186 | 1.6945 |
| 4/16/2019 16:48 | 3.0167 | 2.7333 | 5.6657 | 1.7167 | 2.7057 | 2.82   | 0.2014 | 1.6997 |
| 4/16/2019 16:49 | 2.9917 | 2.1833 | 6.5672 | 2.1583 | 2.6956 | 2.8727 | 0.2186 | 1.7045 |
| 4/16/2019 16:50 | 2.9333 | 2.5333 | 6.3773 | 2.05   | 2.6893 | 2.8    | 0.2142 | 1.7069 |
| 4/16/2019 16:51 | 2.9    | 2.3833 | 6.2181 | 2.625  | 2.7123 | 2.8    | 0.2146 | 1.7027 |
| 4/16/2019 16:52 | 2.8667 | 3.1833 | 6.2766 | 2.2667 | 2.7043 | 2.8    | 0.2284 | 1.6876 |
| 4/16/2019 16:53 | 2.7333 | 2.4833 | 6.3495 | 2.7583 | 2.6749 | 2.8    | 0.208  | 1.6822 |
| 4/16/2019 16:54 | 2.7    | 2.3167 | 6.2292 | 2.2583 | 2.6896 | 2.8    | 0.2144 | 1.6904 |
| 4/16/2019 16:55 | 2.7083 | 1.6667 | 6.2594 | 2.175  | 2.7201 | 2.8    | 0.2185 | 1.6798 |
| 4/16/2019 16:56 | 2.8    | 1.7    | 6.1798 | 1.9167 | 2.7193 | 2.8    | 0.2048 | 1.6799 |
| 4/16/2019 16:57 | 2.7417 | 2.3833 | 6.1333 | 1.5917 | 2.7073 | 2.79   | 0.2195 | 1.6642 |
| 4/16/2019 16:58 | 2.7167 | 2.35   | 5.908  | 2.2917 | 2.7054 | 2.7    | 0.2131 | 1.6515 |
| 4/16/2019 16:59 | 2.625  | 2.4167 | 5.7802 | 1.8917 | 2.7069 | 2.7    | 0.2085 | 1.6865 |
| 4/16/2019 17:00 | 2.5917 | 1.75   | 5.7749 | 2.3    | 2.7003 | 2.625  | 0.2165 | 1.6862 |
| 4/16/2019 17:01 | 2.5083 | 2.3833 | 5.9275 | 1.5917 | 2.6968 | 2.6    | 0.2064 | 1.6964 |
| 4/16/2019 17:02 | 2.5    | 2.0333 | 6.0233 | 1.9583 | 2.6995 | 2.6    | 0.2165 | 1.7107 |
| 4/16/2019 17:03 | 2.5    | 1.6333 | 6.0033 | 2.625  | 2.7013 | 2.6    | 0.2149 | 1.7191 |
| 4/16/2019 17:04 | 2.5    | 1.75   | 5.8725 | 2.525  | 2.7202 | 2.6083 | 0.2067 | 1.7356 |
| 4/16/2019 17:05 | 2.4    | 1.9833 | 5.9583 | 2.0083 | 2.7009 | 2.6091 | 0.2233 | 1.7408 |
| 4/16/2019 17:06 | 2.4    | 2.3    | 6.1122 | 2.325  | 2.695  | 2.6    | 0.213  | 1.7168 |
| 4/16/2019 17:07 | 2.4083 | 1.55   | 5.8847 | 2.2417 | 2.6949 | 2.6333 | 0.2116 | 1.7268 |
| 4/16/2019 17:08 | 2.4833 | 2.0333 | 5.1989 | 2      | 2.7055 | 2.6833 | 0.2189 | 1.7236 |
| 4/16/2019 17:09 | 2.5    | 2.2833 | 5.9211 | 2.2583 | 2.7026 | 2.7    | 0.2141 | 1.7045 |
| 4/16/2019 17:10 | 2.525  | 2.6667 | 6.1494 | 2.3833 | 2.7164 | 2.7    | 0.2145 | 1.7135 |
| 4/16/2019 17:11 | 2.5333 | 2.5667 | 5.964  | 1.35   | 2.7266 | 2.7636 | 0.2199 | 1.7197 |
| 4/16/2019 17:12 | 2.5    | 1.3667 | 5.7104 | 1.975  | 2.7188 | 2.8    | 0.2128 | 1.757  |
| 4/16/2019 17:13 | 2.4333 | 1.9667 | 6.0568 | 1.4    | 2.7087 | 2.8    | 0.2236 | 1.7511 |
| 4/16/2019 17:14 | 2.4    | 1.9167 | 5.7415 | 1.575  | 2.7083 | 2.8    | 0.2109 | 1.7222 |
| 4/16/2019 17:15 | 2.425  | 1.75   | 6.1508 | 2.2667 | 2.7016 | 2.8    | 0.2099 | 1.7024 |
| 4/16/2019 17:16 | 2.5167 | 2.45   | 5.9893 | 2.0917 | 2.7009 | 2.7727 | 0.2251 | 1.7283 |
| 4/16/2019 17:17 | 2.5083 | 2.15   | 5.8349 | 2.1417 | 2.6968 | 2.8    | 0.2082 | 1.7405 |
| 4/16/2019 17:18 | 2.4583 | 1.9833 | 5.9547 | 1.9333 | 2.7083 | 2.8    | 0.2161 | 1.7478 |
| 4/16/2019 17:19 | 2.325  | 1.6    | 5.7956 | 1.8167 | 2.6894 | 2.8    | 0.218  | 1.73   |
| 4/16/2019 17:20 | 2.325  | 1.4333 | 5.5507 | 2.1833 | 2.678  | 2.8    | 0.2057 | 1.6768 |
| 4/16/2019 17:21 | 2.35   | 1.8167 | 5.823  | 2      | 2.6776 | 2.8    | 0.2184 | 1.6932 |
| 4/16/2019 17:22 | 2.3167 | 1.9167 | 5.9529 | 1.9667 | 2.6795 | 2.8    | 0.2141 | 1.6913 |
| 4/16/2019 17:23 | 2.275  | 2.0667 | 5.7807 | 2.0667 | 2.6632 | 2.83   | 0.2078 | 1.6869 |
| 4/16/2019 17:24 | 2.275  | 1.4667 | 5.9231 | 1.7    | 2.6709 | 2.9    | 0.22   | 1.7189 |
| 4/16/2019 17:25 | 2.25   | 1.2167 | 5.721  | 1.8083 | 2.688  | 2.9    | 0.2114 | 1.7372 |
| 4/16/2019 17:26 | 2.225  | 1.5833 | 5.7503 | 2.0083 | 2.6703 | 2.9    | 0.2134 | 1.705  |
| 4/16/2019 17:27 | 2.2    | 1.3    | 5.3983 | 2.275  | 2.6618 | 2.9    | 0.2219 | 1.7177 |
| 4/16/2019 17:28 | 2.1833 | 1.95   | 5.7667 | 1.6333 | 2.6703 | 2.9    | 0.2064 | 1.7393 |

|                 |        |        |        |        |        |        |        |        |
|-----------------|--------|--------|--------|--------|--------|--------|--------|--------|
| 4/16/2019 17:29 | 2.1    | 1.55   | 5.7245 | 1.9083 | 2.6552 | 2.9    | 0.2178 | 1.7514 |
| 4/16/2019 17:30 | 2.0333 | 1.4667 | 5.7998 | 2.15   | 2.6583 | 2.9    | 0.2093 | 1.7176 |
| 4/16/2019 17:31 | 2.1    | 1.65   | 5.7912 | 1.7333 | 2.659  | 2.9    | 0.2118 | 1.7179 |
| 4/16/2019 17:32 | 2.1917 | 2      | 5.7917 | 0.9083 | 2.6468 | 2.9    | 0.2198 | 1.7208 |
| 4/16/2019 17:33 | 2.2083 | 2.2167 | 6.0212 | 2.375  | 2.6369 | 2.9    | 0.2046 | 1.7223 |
| 4/16/2019 17:34 | 2.2083 | 1.7    | 5.784  | 2.4    | 2.6478 | 2.9    | 0.2234 | 1.7293 |
| 4/16/2019 17:35 | 2.1417 | 1.2333 | 5.7948 | 1.7583 | 2.6472 | 2.86   | 0.2135 | 1.724  |
| 4/16/2019 17:36 | 2.1583 | 1.3    | 5.9402 | 1.6833 | 2.6433 | 2.8    | 0.2099 | 1.7033 |
| 4/16/2019 17:37 | 2.1417 | 1.45   | 5.8923 | 1.6583 | 2.6378 | 2.8    | 0.2231 | 1.7345 |
| 4/16/2019 17:38 | 2.1333 | 1.7333 | 5.7427 | 1.3083 | 2.6388 | 2.8    | 0.2143 | 1.7578 |
| 4/16/2019 17:39 | 2.1    | 1.9667 | 5.8583 | 1.5917 | 2.6383 | 2.8    | 0.2163 | 1.7525 |
| 4/16/2019 17:40 | 2.0083 | 1.9833 | 5.7793 | 1.4    | 2.6327 | 2.85   | 0.2197 | 1.7335 |
| 4/16/2019 17:41 | 2.0545 | 1.4    | 5.5353 | 1.5917 | 2.6353 | 2.9    | 0.2133 | 1.7456 |
| 4/16/2019 17:42 | 2.0083 | 1.2667 | 5.7742 | 1.7167 | 2.6176 | 2.9    | 0.2234 | 1.7836 |
| 4/16/2019 17:43 | 2      | 1.6    | 5.6077 | 1.6    | 2.6334 | 2.9    | 0.2116 | 1.7742 |
| 4/16/2019 17:44 | 1.9417 | 1.3    | 5.5938 | 1.3    | 2.6377 | 2.9909 | 0.219  | 1.7453 |
| 4/16/2019 17:45 | 1.9167 | 1.7333 | 5.4513 | 1.825  | 2.6233 | 3      | 0.2249 | 1.7255 |
| 4/16/2019 17:46 | 1.9    | 1.4333 | 5.5002 | 1.2083 | 2.6208 | 3      | 0.2074 | 1.7365 |
| 4/16/2019 17:47 | 1.9    | 1.4167 | 5.4913 | 1.5417 | 2.6168 | 3      | 0.2163 | 1.7367 |
| 4/16/2019 17:48 | 1.9    | 1.3333 | 5.645  | 1.775  | 2.6057 | 3      | 0.2113 | 1.7583 |
| 4/16/2019 17:49 | 1.9    | 1.4    | 5.647  | 1.45   | 2.6072 | 3      | 0.2117 | 1.7621 |
| 4/16/2019 17:50 | 1.9    | 1.65   | 5.4745 | 1.575  | 2.6053 | 3      | 0.2183 | 1.762  |
| 4/16/2019 17:51 | 1.9    | 1.3333 | 5.4608 | 2.075  | 2.6006 | 3      | 0.2099 | 1.7532 |
| 4/16/2019 17:52 | 1.825  | 0.8833 | 5.4057 | 1.9333 | 2.5893 | 3      | 0.2165 | 1.72   |
| 4/16/2019 17:53 | 1.8    | 1.2333 | 5.5848 | 1.7083 | 2.5885 | 2.975  | 0.2213 | 1.722  |
| 4/16/2019 17:54 | 1.825  | 1.3833 | 5.3628 | 1.5333 | 2.5686 | 2.9    | 0.2122 | 1.7548 |
| 4/16/2019 17:55 | 1.85   | 1.9333 | 5.149  | 1.2167 | 2.5788 | 2.9    | 0.2155 | 1.7418 |
| 4/16/2019 17:56 | 1.9167 | 2.1    | 5.6672 | 1.8833 | 2.5823 | 2.9    | 0.2004 | 1.7333 |
| 4/16/2019 17:57 | 1.9833 | 1.5667 | 5.499  | 1.6333 | 2.5734 | 2.9    | 0.221  | 1.7602 |
| 4/16/2019 17:58 | 2      | 1.5667 | 5.6478 | 1.2417 | 2.5809 | 2.9    | 0.2176 | 1.7622 |
| 4/16/2019 17:59 | 2      | 1.25   | 5.8877 | 1.4917 | 2.5609 | 2.8909 | 0.2077 | 1.7931 |
| 4/16/2019 18:00 | 1.9917 | 0.8667 | 5.6347 | 1.375  | 2.5465 | 2.8    | 0.222  | 1.7869 |
| 4/16/2019 18:01 | 2      | 1.3833 | 5.5525 | 1.75   | 2.5565 | 2.8    | 0.2107 | 1.7878 |
| 4/16/2019 18:02 | 2      | 1.75   | 5.868  | 1.7167 | 2.5393 | 2.8    | 0.2156 | 1.7784 |
| 4/16/2019 18:03 | 2.05   | 1.4333 | 5.8288 | 1.8    | 2.5366 | 2.8    | 0.2186 | 1.7663 |
| 4/16/2019 18:04 | 2.1    | 1.45   | 5.5167 | 1.725  | 2.5305 | 2.8    | 0.2093 | 1.7883 |
| 4/16/2019 18:05 | 2.075  | 1.5667 | 5.6918 | 1.6583 | 2.535  | 2.8    | 0.2241 | 1.8036 |
| 4/16/2019 18:06 | 2      | 2.1333 | 5.6372 | 1.725  | 2.5359 | 2.8    | 0.2155 | 1.7959 |
| 4/16/2019 18:07 | 1.9917 | 1.4    | 5.4543 | 1.8333 | 2.537  | 2.8    | 0.2136 | 1.7918 |
| 4/16/2019 18:08 | 2      | 1.5833 | 5.6838 | 1.8417 | 2.5324 | 2.8    | 0.2175 | 1.803  |
| 4/16/2019 18:09 | 2      | 2.1    | 5.4937 | 1.3833 | 2.5283 | 2.8    | 0.2152 | 1.8035 |
| 4/16/2019 18:10 | 2      | 1.7833 | 5.8675 | 1.75   | 2.5278 | 2.8818 | 0.2222 | 1.804  |
| 4/16/2019 18:11 | 2      | 2.05   | 5.693  | 1.8833 | 2.5088 | 2.9    | 0.2149 | 1.8214 |
| 4/16/2019 18:12 | 2.0417 | 1.5    | 5.678  | 1.825  | 2.5009 | 2.9    | 0.2127 | 1.8183 |
| 4/16/2019 18:13 | 2.1    | 1.7    | 5.603  | 2.15   | 2.4902 | 2.9364 | 0.2219 | 1.7778 |
| 4/16/2019 18:14 | 2.0917 | 2.2    | 5.7655 | 1.45   | 2.4998 | 2.9444 | 0.2084 | 1.7849 |
| 4/16/2019 18:15 | 2.1    | 2.0667 | 5.5887 | 1.6667 | 2.4848 | 2.9    | 0.2205 | 1.8108 |



|                 |        |        |        |        |        |        |        |        |
|-----------------|--------|--------|--------|--------|--------|--------|--------|--------|
| 4/16/2019 18:16 | 2.1083 | 1.5833 | 5.8452 | 2.2    | 2.4834 | 2.9    | 0.2137 | 1.8048 |
| 4/16/2019 18:17 | 2.1833 | 1.95   | 5.7943 | 2.2667 | 2.4987 | 2.9    | 0.2087 | 1.7996 |
| 4/16/2019 18:18 | 2.2    | 1.6333 | 5.738  | 2.1    | 2.4803 | 2.9    | 0.2278 | 1.8012 |
| 4/16/2019 18:19 | 2.25   | 1.3667 | 6.0483 | 1.5333 | 2.4612 | 2.9    | 0.2137 | 1.7959 |
| 4/16/2019 18:20 | 2.3    | 1.6333 | 6.0322 | 2.075  | 2.4764 | 2.9    | 0.2255 | 1.7736 |
| 4/16/2019 18:21 | 2.3    | 2.1167 | 5.9218 | 1.8833 | 2.4604 | 2.9    | 0.2119 | 1.7553 |
| 4/16/2019 18:22 | 2.3    | 1.7    | 5.6683 | 1.9833 | 2.4588 | 2.9    | 0.2152 | 1.7758 |
| 4/16/2019 18:23 | 2.3    | 1.7667 | 5.774  | 2.15   | 2.4461 | 2.8727 | 0.2252 | 1.7936 |
| 4/16/2019 18:24 | 2.3833 | 2.35   | 5.5577 | 2.1333 | 2.4633 | 2.87   | 0.209  | 1.7818 |
| 4/16/2019 18:25 | 2.4    | 2.45   | 5.8252 | 1.5833 | 2.4469 | 2.8    | 0.2179 | 1.7735 |
| 4/16/2019 18:26 | 2.4333 | 1.7833 | 5.8125 | 1.625  | 2.4569 | 2.83   | 0.2129 | 1.7736 |
| 4/16/2019 18:27 | 2.4    | 2.0333 | 5.9288 | 1.7    | 2.4379 | 2.9    | 0.2133 | 1.7808 |
| 4/16/2019 18:28 | 2.4    | 2.3833 | 5.7957 | 1.9333 | 2.4453 | 2.9    | 0.2252 | 1.804  |
| 4/16/2019 18:29 | 2.4    | 1.9833 | 5.941  | 1.6333 | 2.4572 | 2.9    | 0.21   | 1.7887 |
| 4/16/2019 18:30 | 2.4    | 2.0833 | 5.9347 | 2.3833 | 2.4474 | 2.9    | 0.2208 | 1.78   |
| 4/16/2019 18:31 | 2.4083 | 1.5667 | 5.9018 | 2.3    | 2.4359 | 2.9    | 0.2131 | 1.8001 |
| 4/16/2019 18:32 | 2.4833 | 1.7333 | 6.1683 | 2.2417 | 2.42   | 2.9    | 0.2098 | 1.8193 |
| 4/16/2019 18:33 | 2.5    | 2.1    | 5.6438 | 1.5417 | 2.4396 | 2.9182 | 0.2285 | 1.7963 |
| 4/16/2019 18:34 | 2.5    | 1.7167 | 5.6217 | 2.025  | 2.4369 | 3      | 0.2126 | 1.7968 |
| 4/16/2019 18:35 | 2.4167 | 2.3167 | 5.7595 | 1.8083 | 2.4358 | 3      | 0.2111 | 1.7903 |
| 4/16/2019 18:36 | 2.4    | 1.7667 | 5.615  | 1.9167 | 2.44   | 3      | 0.2186 | 1.8228 |
| 4/16/2019 18:37 | 2.425  | 2.2167 | 5.762  | 2.2333 | 2.4182 | 3      | 0.2047 | 1.8022 |
| 4/16/2019 18:38 | 2.5    | 2.4667 | 5.95   | 2.1417 | 2.4147 | 3      | 0.2244 | 1.7707 |
| 4/16/2019 18:39 | 2.5083 | 1.5333 | 5.8648 | 2.0167 | 2.4364 | 3      | 0.213  | 1.7741 |
| 4/16/2019 18:40 | 2.5083 | 2.2333 | 5.7597 | 1.8167 | 2.3939 | 3      | 0.2163 | 1.7903 |
| 4/16/2019 18:41 | 2.4091 | 2.1833 | 6.0282 | 2.2167 | 2.3989 | 3      | 0.2241 | 1.7999 |
| 4/16/2019 18:42 | 2.4    | 1.7167 | 5.6503 | 1.7167 | 2.3971 | 3      | 0.2095 | 1.8013 |
| 4/16/2019 18:43 | 2.4    | 2.5833 | 6.0198 | 2.2917 | 2.3852 | 3      | 0.2218 | 1.815  |
| 4/16/2019 18:44 | 2.4    | 1.65   | 5.8988 | 1.925  | 2.4094 | 2.9889 | 0.2146 | 1.8294 |
| 4/16/2019 18:45 | 2.35   | 1.8167 | 5.629  | 1.425  | 2.3998 | 2.9    | 0.2143 | 1.834  |
| 4/16/2019 18:46 | 2.3167 | 2.2667 | 5.4708 | 1.8417 | 2.3981 | 2.9    | 0.222  | 1.8386 |
| 4/16/2019 18:47 | 2.2833 | 1.6    | 5.8603 | 1.7667 | 2.3803 | 2.9    | 0.2123 | 1.8066 |
| 4/16/2019 18:48 | 2.2083 | 2.3667 | 5.7618 | 1.2833 | 2.37   | 2.9    | 0.2169 | 1.7966 |
| 4/16/2019 18:49 | 2.1167 | 2.1167 | 5.7707 | 1.725  | 2.4014 | 2.9    | 0.2122 | 1.8063 |
| 4/16/2019 18:50 | 2.1    | 1.9167 | 5.9347 | 1.8833 | 2.3778 | 2.9    | 0.2161 | 1.7788 |
| 4/16/2019 18:51 | 2.1    | 2.55   | 5.6968 | 1.775  | 2.3824 | 2.9    | 0.2185 | 1.8107 |
| 4/16/2019 18:52 | 2.1    | 1.7667 | 5.6703 | 1.8917 | 2.3853 | 2.9    | 0.2072 | 1.8387 |
| 4/16/2019 18:53 | 2.0667 | 1.2167 | 5.6385 | 1.725  | 2.3779 | 2.9    | 0.2173 | 1.8255 |
| 4/16/2019 18:54 | 2.0917 | 1.8333 | 5.6652 | 1.5583 | 2.3597 | 2.9    | 0.2093 | 1.8147 |
| 4/16/2019 18:55 | 2.1583 | 2.0833 | 5.4255 | 1.8083 | 2.3592 | 2.8667 | 0.214  | 1.81   |
| 4/16/2019 18:56 | 2.125  | 1.5333 | 5.2917 | 1.6417 | 2.3661 | 2.9    | 0.2199 | 1.8093 |
| 4/16/2019 18:57 | 2.1417 | 2.1167 | 5.4543 | 1.8167 | 2.3563 | 2.9    | 0.2048 | 1.8015 |
| 4/16/2019 18:58 | 2.1583 | 2.2333 | 5.743  | 1.5333 | 2.3689 | 2.9    | 0.2186 | 1.8104 |
| 4/16/2019 18:59 | 2.1833 | 1.8667 | 5.497  | 1.75   | 2.3638 | 2.9    | 0.2093 | 1.8223 |
| 4/16/2019 19:00 | 2.1167 | 2.3    | 5.6044 | 1.2167 | 2.3625 | 2.9    | 0.2164 | 1.8293 |
| 4/16/2019 19:01 | 2.1    | 2.3667 | 5.994  | 1.4417 | 2.354  | 2.9    | 0.2171 | 1.8216 |
| 4/16/2019 19:02 | 2.0417 | 1.6333 | 5.8453 | 2.125  | 2.3617 | 2.9    | 0.206  | 1.8204 |

|                 |        |        |        |        |        |        |        |        |
|-----------------|--------|--------|--------|--------|--------|--------|--------|--------|
| 4/16/2019 19:03 | 2.0167 | 1.3    | 5.6845 | 1.5417 | 2.3589 | 2.9    | 0.2201 | 1.8113 |
| 4/16/2019 19:04 | 2.0667 | 1.9167 | 5.6817 | 2.3333 | 2.3285 | 2.9    | 0.2039 | 1.8411 |
| 4/16/2019 19:05 | 2.1    | 1.5    | 5.2748 | 1.6833 | 2.3543 | 2.9    | 0.2143 | 1.8571 |
| 4/16/2019 19:06 | 2.1    | 1.8    | 5.6812 | 2.3417 | 2.3447 | 2.9    | 0.2196 | 1.8174 |
| 4/16/2019 19:07 | 2.1    | 1.9333 | 5.2696 | 2.2167 | 2.344  | 2.9    | 0.207  | 1.7958 |
| 4/16/2019 19:08 | 2.1    | 1.95   | 5.6498 | 2.15   | 2.348  | 2.9    | 0.2169 | 1.7972 |
| 4/16/2019 19:09 | 2.1    | 2.15   | 5.7297 | 2.3    | 2.3484 | 2.9    | 0.2093 | 1.8237 |
| 4/16/2019 19:10 | 2.1    | 2.2833 | 5.4136 | 1.9417 | 2.3661 | 2.9    | 0.2168 | 1.8202 |
| 4/16/2019 19:11 | 2.1167 | 1.8667 | 5.716  | 1.925  | 2.3761 | 2.9    | 0.2125 | 1.8092 |
| 4/16/2019 19:12 | 2.15   | 1.1333 | 5.4628 | 1.725  | 2.3656 | 2.9    | 0.2084 | 1.8249 |
| 4/16/2019 19:13 | 2.2    | 1.6833 | 5.7879 | 1.4083 | 2.3816 | 2.9    | 0.2149 | 1.8073 |
| 4/16/2019 19:14 | 2.1417 | 1.6833 | 5.3663 | 2.0417 | 2.3951 | 2.9    | 0.199  | 1.7978 |
| 4/16/2019 19:15 | 2.1    | 1.4167 | 5.4805 | 1.55   | 2.4052 | 2.9    | 0.2189 | 1.8255 |
| 4/16/2019 19:16 | 2.0833 | 0.8667 | 5.3671 | 1.55   | 2.4118 | 2.9    | 0.2125 | 1.8363 |
| 4/16/2019 19:17 | 2.05   | 1.6667 | 5.3448 | 2.1167 | 2.4292 | 2.9    | 0.2113 | 1.8431 |
| 4/16/2019 19:18 | 2.0417 | 2.3    | 5.1858 | 2.2583 | 2.4309 | 2.9    | 0.2123 | 1.833  |
| 4/16/2019 19:19 | 2      | 1.0333 | 5.6697 | 1.0917 | 2.413  | 2.9    | 0.1987 | 1.8278 |
| 4/16/2019 19:20 | 1.9833 | 1.5    | 5.4096 | 2.1917 | 2.4325 | 2.9    | 0.216  | 1.8402 |
| 4/16/2019 19:21 | 1.9167 | 1.0333 | 5.18   | 1.5833 | 2.4154 | 2.9    | 0.2073 | 1.8363 |
| 4/16/2019 19:22 | 1.9417 | 1.15   | 5.7774 | 1.4083 | 2.4574 | 2.9    | 0.2045 | 1.8161 |
| 4/16/2019 19:23 | 1.9083 | 1.6333 | 5.2667 | 1.7    | 2.4635 | 2.9167 | 0.2154 | 1.7997 |
| 4/16/2019 19:24 | 1.9    | 1      | 5.3111 | 1.1917 | 2.4682 | 3      | 0.2008 | 1.8259 |
| 4/16/2019 19:25 | 1.9333 | 2.0833 | 5.272  | 1.3333 | 2.4854 | 3      | 0.2109 | 1.823  |
| 4/16/2019 19:26 | 2      | 1.1333 | 5.3764 | 1.6    | 2.4758 | 3      | 0.2052 | 1.7999 |
| 4/16/2019 19:27 | 2      | 1.8333 | 5.5316 | 1.775  | 2.4999 | 3      | 0.1997 | 1.8168 |
| 4/16/2019 19:28 | 1.925  | 1.8833 | 5.497  | 0.975  | 2.5134 | 3      | 0.212  | 1.8186 |
| 4/16/2019 19:29 | 1.9    | 1.2833 | 5.375  | 1.7    | 2.5053 | 3      | 0.1996 | 1.8073 |
| 4/16/2019 19:30 | 1.9    | 1.6667 | 5.3505 | 1.3417 | 2.5251 | 3      | 0.2089 | 1.8398 |
| 4/16/2019 19:31 | 1.9    | 1.4333 | 5.3502 | 1.3083 | 2.5285 | 3      | 0.2018 | 1.831  |
| 4/16/2019 19:32 | 1.8417 | 1.4833 | 5.2003 | 1.7667 | 2.543  | 3      | 0.203  | 1.8099 |
| 4/16/2019 19:33 | 1.8    | 1.8833 | 5.2565 | 1.9917 | 2.5581 | 3      | 0.2068 | 1.8013 |
| 4/16/2019 19:34 | 1.8    | 1.8    | 5.2858 | 1.1167 | 2.5576 | 3      | 0.2037 | 1.8216 |
| 4/16/2019 19:35 | 1.8    | 2.0833 | 5.2226 | 1.3333 | 2.5668 | 3      | 0.2013 | 1.8136 |
| 4/16/2019 19:36 | 1.8    | 1.9167 | 5.2782 | 1.5833 | 2.5678 | 3      | 0.2148 | 1.8478 |
| 4/16/2019 19:37 | 1.8    | 0.7333 | 5.2069 | 1.475  | 2.559  | 2.96   | 0.1968 | 1.8114 |
| 4/16/2019 19:38 | 1.8    | 0.7833 | 5.2869 | 1.5417 | 2.5991 | 2.9    | 0.2101 | 1.8162 |
| 4/16/2019 19:39 | 1.8    | 1.05   | 5.2009 | 1.8083 | 2.5842 | 2.9    | 0.1997 | 1.7994 |
| 4/16/2019 19:40 | 1.8    | 1.6167 | 5.1413 | 1.575  | 2.5794 | 2.9    | 0.2018 | 1.8078 |
| 4/16/2019 19:41 | 1.7917 | 1.4833 | 4.772  | 1.4333 | 2.5979 | 2.9    | 0.2039 | 1.8133 |
| 4/16/2019 19:42 | 1.7583 | 0.8    | 5.1776 | 1.3333 | 2.599  | 2.9    | 0.1951 | 1.8033 |
| 4/16/2019 19:43 | 1.7667 | 1.4333 | 5.1615 | 1.8417 | 2.6018 | 2.9    | 0.2097 | 1.8076 |
| 4/16/2019 19:44 | 1.75   | 1.95   | 5.1947 | 0.9083 | 2.6143 | 2.9    | 0.1943 | 1.7823 |
| 4/16/2019 19:45 | 1.7    | 1.6167 | 5.2809 | 1.05   | 2.6323 | 2.8667 | 0.2073 | 1.8088 |
| 4/16/2019 19:46 | 1.6917 | 1.65   | 5.2235 | 1.4833 | 2.6424 | 2.8    | 0.2077 | 1.8418 |
| 4/16/2019 19:47 | 1.6    | 1.7    | 4.763  | 1.3417 | 2.6492 | 2.8    | 0.1941 | 1.841  |
| 4/16/2019 19:48 | 1.6    | 1.4667 | 4.9572 | 0.7417 | 2.6463 | 2.8    | 0.2088 | 1.8408 |
| 4/16/2019 19:49 | 1.65   | 0.9333 | 5.256  | 1.6917 | 2.6434 | 2.8    | 0.1896 | 1.8298 |

|                 |        |        |        |        |        |        |        |        |
|-----------------|--------|--------|--------|--------|--------|--------|--------|--------|
| 4/16/2019 19:50 | 1.7    | 0.8833 | 5.1911 | 1.6    | 2.6222 | 2.8    | 0.2044 | 1.7873 |
| 4/16/2019 19:51 | 1.6833 | 1.7833 | 5.3955 | 1.475  | 2.6555 | 2.8    | 0.203  | 1.7845 |
| 4/16/2019 19:52 | 1.675  | 1.4667 | 4.9448 | 1.95   | 2.6359 | 2.8    | 0.195  | 1.805  |
| 4/16/2019 19:53 | 1.7    | 1.7667 | 5.4123 | 1.25   | 2.6287 | 2.8    | 0.2066 | 1.7989 |
| 4/16/2019 19:54 | 1.7    | 1.4    | 5.1993 | 1.025  | 2.6579 | 2.8    | 0.1923 | 1.8135 |
| 4/16/2019 19:55 | 1.7    | 1.6333 | 5.1324 | 1.0583 | 2.6863 | 2.8    | 0.2052 | 1.8185 |
| 4/16/2019 19:56 | 1.7083 | 1.75   | 5.0318 | 1.3917 | 2.6781 | 2.8    | 0.1962 | 1.8118 |
| 4/16/2019 19:57 | 1.8    | 1.2    | 5.0712 | 0.8    | 2.6784 | 2.8636 | 0.1969 | 1.8097 |
| 4/16/2019 19:58 | 1.775  | 1.0333 | 5.1666 | 1.6833 | 2.6888 | 2.84   | 0.2011 | 1.8028 |
| 4/16/2019 19:59 | 1.7    | 1.6333 | 4.9707 | 0.725  | 2.6874 | 2.9    | 0.1917 | 1.8073 |
| 4/16/2019 20:00 | 1.7    | 0.85   | 5.4086 | 0.9167 | 2.6995 | 2.9    | 0.2012 | 1.7722 |
| 4/16/2019 20:01 | 1.6917 | 1.5333 | 5.1066 | 1.6417 | 2.7034 | 2.9    | 0.1993 | 1.7681 |
| 4/16/2019 20:02 | 1.6833 | 1.6167 | 4.9003 | 1.9417 | 2.7086 | 2.9    | 0.1982 | 1.7808 |
| 4/16/2019 20:03 | 1.7    | 1.3    | 5.1528 | 1.55   | 2.7453 | 2.9    | 0.2016 | 1.8218 |
| 4/16/2019 20:04 | 1.7    | 0.9833 | 5.1364 | 1.0833 | 2.7451 | 2.9    | 0.1924 | 1.8439 |
| 4/16/2019 20:05 | 1.725  | 1.0167 | 4.9812 | 1.2167 | 2.7275 | 2.9    | 0.2058 | 1.8304 |
| 4/16/2019 20:06 | 1.7    | 1.0167 | 4.9848 | 1.3583 | 2.7292 | 2.9    | 0.1987 | 1.8386 |
| 4/16/2019 20:07 | 1.7583 | 1.6    | 4.7094 | 1.175  | 2.7451 | 2.9    | 0.1939 | 1.8073 |
| 4/16/2019 20:08 | 1.8    | 1.4833 | 4.9917 | 1.3917 | 2.7867 | 2.9    | 0.1971 | 1.8087 |
| 4/16/2019 20:09 | 1.8    | 1.8833 | 4.7713 | 0.9417 | 2.788  | 2.9    | 0.1915 | 1.8042 |
| 4/16/2019 20:10 | 1.8    | 1.55   | 4.9348 | 1.3167 | 2.7869 | 2.9    | 0.2018 | 1.8218 |
| 4/16/2019 20:11 | 1.7167 | 1.4833 | 4.9819 | 1.0583 | 2.7668 | 2.9    | 0.1949 | 1.8179 |
| 4/16/2019 20:12 | 1.7    | 1.6667 | 4.8388 | 0.9583 | 2.7679 | 2.9    | 0.1893 | 1.8008 |
| 4/16/2019 20:13 | 1.6583 | 1.4    | 4.9897 | 1.1833 | 2.8058 | 2.9    | 0.2081 | 1.8128 |
| 4/16/2019 20:14 | 1.7    | 1.4333 | 4.979  | 1.375  | 2.8158 | 2.9    | 0.186  | 1.791  |
| 4/16/2019 20:15 | 1.7    | 1.4667 | 5.0371 | 1.5833 | 2.7868 | 2.9    | 0.1976 | 1.8009 |
| 4/16/2019 20:16 | 1.7    | 0.7    | 4.8913 | 1.325  | 2.7922 | 2.9    | 0.1908 | 1.8114 |
| 4/16/2019 20:17 | 1.625  | 1.2333 | 4.9144 | 1.7833 | 2.8133 | 2.9    | 0.1919 | 1.8143 |
| 4/16/2019 20:18 | 1.6    | 1.3333 | 4.8175 | 0.9917 | 2.8106 | 2.9    | 0.2004 | 1.7972 |
| 4/16/2019 20:19 | 1.6    | 0.7833 | 4.7245 | 1.7667 | 2.8334 | 2.9    | 0.18   | 1.7835 |
| 4/16/2019 20:20 | 1.6    | 1.9833 | 4.8623 | 1.5    | 2.84   | 2.9    | 0.1983 | 1.776  |
| 4/16/2019 20:21 | 1.6083 | 0.7333 | 4.7134 | 1.5083 | 2.8224 | 2.9    | 0.1977 | 1.7811 |
| 4/16/2019 20:22 | 1.625  | 1.2    | 4.8092 | 1.575  | 2.8444 | 2.9    | 0.1929 | 1.7764 |
| 4/16/2019 20:23 | 1.6    | 1.7833 | 4.6794 | 1.9667 | 2.8462 | 2.9    | 0.2061 | 1.8092 |
| 4/16/2019 20:24 | 1.6    | 1.4667 | 4.6902 | 0.9    | 2.8667 | 2.94   | 0.1904 | 1.8126 |
| 4/16/2019 20:25 | 1.6    | 1.7833 | 4.8268 | 1.2583 | 2.8507 | 3      | 0.2027 | 1.8101 |
| 4/16/2019 20:26 | 1.6    | 1.4167 | 4.934  | 0.5833 | 2.8427 | 3      | 0.1935 | 1.8188 |
| 4/16/2019 20:27 | 1.5583 | 1.1167 | 4.8923 | 1.2667 | 2.8558 | 3      | 0.1864 | 1.8173 |
| 4/16/2019 20:28 | 1.5    | 1.1333 | 4.827  | 0.9917 | 2.8573 | 3      | 0.2034 | 1.8246 |
| 4/16/2019 20:29 | 1.5    | 1.2833 | 4.9403 | 1.1083 | 2.8702 | 3      | 0.1905 | 1.8363 |
| 4/16/2019 20:30 | 1.5    | 1.2167 | 4.7428 | 1.0417 | 2.8772 | 3      | 0.1897 | 1.836  |
| 4/16/2019 20:31 | 1.5    | 0.95   | 4.6857 | 1.0917 | 2.8688 | 3.0636 | 0.2003 | 1.8354 |
| 4/16/2019 20:32 | 1.5083 | 0.8833 | 4.738  | 1.0667 | 2.8783 | 3      | 0.1836 | 1.8242 |
| 4/16/2019 20:33 | 1.5833 | 1.1833 | 5.0248 | 0.9417 | 2.8881 | 3      | 0.1972 | 1.7965 |
| 4/16/2019 20:34 | 1.5167 | 0.85   | 4.7767 | 0.9    | 2.8668 | 3      | 0.1926 | 1.7875 |
| 4/16/2019 20:35 | 1.5    | 1.35   | 4.733  | 1.0583 | 2.8788 | 3      | 0.1925 | 1.7731 |
| 4/16/2019 20:36 | 1.5    | 1.15   | 4.7685 | 1.225  | 2.8864 | 3      | 0.1971 | 1.8278 |

|                 |        |        |        |        |        |        |        |        |
|-----------------|--------|--------|--------|--------|--------|--------|--------|--------|
| 4/16/2019 20:37 | 1.525  | 1.7667 | 4.7468 | 1.5    | 2.8936 | 2.9727 | 0.1764 | 1.825  |
| 4/16/2019 20:38 | 1.55   | 1.1667 | 4.7788 | 1      | 2.8907 | 2.9    | 0.2003 | 1.8021 |
| 4/16/2019 20:39 | 1.6    | 1.1    | 4.683  | 0.95   | 2.8827 | 2.9    | 0.1985 | 1.7987 |
| 4/16/2019 20:40 | 1.6    | 1.8833 | 4.5788 | 0.7333 | 2.8971 | 2.9    | 0.1946 | 1.8348 |
| 4/16/2019 20:41 | 1.6    | 1.1833 | 4.6302 | 0.8    | 2.9098 | 2.9    | 0.2008 | 1.8296 |
| 4/16/2019 20:42 | 1.6    | 1.6    | 4.6112 | 0.9    | 2.9294 | 2.9    | 0.1875 | 1.8095 |
| 4/16/2019 20:43 | 1.6167 | 0.9167 | 4.6815 | 1.45   | 2.9105 | 2.9    | 0.1969 | 1.8013 |
| 4/16/2019 20:44 | 1.7    | 1.2    | 4.8618 | 0.9833 | 2.9088 | 2.9    | 0.1883 | 1.8021 |
| 4/16/2019 20:45 | 1.6583 | 0.8    | 4.5392 | 1.05   | 2.9048 | 2.9    | 0.1933 | 1.8337 |
| 4/16/2019 20:46 | 1.575  | 1.65   | 4.98   | 1.3417 | 2.8993 | 2.9    | 0.1997 | 1.7963 |
| 4/16/2019 20:47 | 1.5    | 1.4833 | 4.694  | 0.8167 | 2.9095 | 2.9    | 0.1896 | 1.7878 |
| 4/16/2019 20:48 | 1.5    | 0.8    | 4.617  | 1.2333 | 2.9162 | 2.9    | 0.2015 | 1.796  |
| 4/16/2019 20:49 | 1.5    | 0.6    | 4.7027 | 1.2417 | 2.9053 | 2.9    | 0.1901 | 1.8313 |
| 4/16/2019 20:50 | 1.4917 | 1.05   | 4.504  | 1.2917 | 2.9148 | 2.9    | 0.1932 | 1.8282 |
| 4/16/2019 20:51 | 1.5    | 1.4833 | 4.6817 | 1.075  | 2.9008 | 2.9    | 0.1945 | 1.8317 |
| 4/16/2019 20:52 | 1.5    | 0.8    | 4.6697 | 1.0417 | 2.905  | 2.9    | 0.1849 | 1.8068 |
| 4/16/2019 20:53 | 1.6    | 1.1167 | 4.4698 | 1.1333 | 2.9062 | 2.95   | 0.2038 | 1.8014 |
| 4/16/2019 20:54 | 1.6    | 1.05   | 4.8193 | 1.1    | 2.9078 | 2.9364 | 0.1856 | 1.7901 |
| 4/16/2019 20:55 | 1.575  | 0.45   | 4.8068 | 0.8583 | 2.9088 | 2.9636 | 0.1881 | 1.7846 |
| 4/16/2019 20:56 | 1.4833 | 0.9    | 4.5572 | 1.2833 | 2.9103 | 2.9    | 0.1982 | 1.7847 |
| 4/16/2019 20:57 | 1.4    | 0.8667 | 4.6252 | 0.3667 | 2.9113 | 2.9    | 0.1865 | 1.8276 |
| 4/16/2019 20:58 | 1.3917 | 1.2333 | 4.6833 | 1.0083 | 2.9226 | 2.9    | 0.1961 | 1.8219 |
| 4/16/2019 20:59 | 1.4167 | 1.65   | 4.8052 | 0.7083 | 2.9124 | 2.9    | 0.1944 | 1.8193 |
| 4/16/2019 21:00 | 1.5    | 1.4833 | 4.8657 | 1.4167 | 2.9093 | 2.9    | 0.1938 | 1.8251 |
| 4/16/2019 21:01 | 1.5091 | 1.4333 | 4.6688 | 1.625  | 2.9093 | 2.9    | 0.1963 | 1.803  |
| 4/16/2019 21:02 | 1.5583 | 1.8167 | 4.5362 | 1.325  | 2.8999 | 2.8636 | 0.1795 | 1.8039 |
| 4/16/2019 21:03 | 1.5917 | 1.0167 | 4.4275 | 1.2167 | 2.9214 | 2.8545 | 0.2011 | 1.8205 |
| 4/16/2019 21:04 | 1.6    | 1.3333 | 4.9723 | 0.7    | 2.9203 | 2.8    | 0.1985 | 1.7853 |
| 4/16/2019 21:05 | 1.6    | 1.2333 | 4.6752 | 1.2583 | 2.9153 | 2.8    | 0.1929 | 1.8013 |
| 4/16/2019 21:06 | 1.6    | 1.0833 | 4.8782 | 1.2333 | 2.904  | 2.8    | 0.1992 | 1.8215 |
| 4/16/2019 21:07 | 1.6    | 0.8167 | 4.5463 | 0.9417 | 2.9198 | 2.8    | 0.1863 | 1.8218 |
| 4/16/2019 21:08 | 1.6    | 1.3    | 4.6022 | 0.9667 | 2.9198 | 2.8    | 0.1967 | 1.8343 |
| 4/16/2019 21:09 | 1.525  | 1.3833 | 4.4943 | 0.9917 | 2.9103 | 2.8    | 0.1962 | 1.8413 |
| 4/16/2019 21:10 | 1.5    | 1.1667 | 4.4788 | 1.4917 | 2.9    | 2.8    | 0.1948 | 1.8398 |
| 4/16/2019 21:11 | 1.5833 | 1.3333 | 4.7637 | 1.325  | 2.8998 | 2.8    | 0.2015 | 1.8169 |
| 4/16/2019 21:12 | 1.6    | 1.8167 | 4.8765 | 1.1583 | 2.9073 | 2.8    | 0.1826 | 1.812  |
| 4/16/2019 21:13 | 1.6    | 1.1833 | 4.4393 | 0.5833 | 2.92   | 2.8    | 0.1963 | 1.8071 |
| 4/16/2019 21:14 | 1.6    | 0.5833 | 4.387  | 0.6833 | 2.907  | 2.8    | 0.201  | 1.8011 |
| 4/16/2019 21:15 | 1.6    | 1.5833 | 4.5175 | 1.0667 | 2.9219 | 2.8    | 0.1838 | 1.8219 |
| 4/16/2019 21:16 | 1.6    | 1.1167 | 4.5167 | 0.9917 | 2.9174 | 2.8182 | 0.2002 | 1.823  |
| 4/16/2019 21:17 | 1.6    | 1.1833 | 4.7043 | 1.4333 | 2.9336 | 2.85   | 0.1882 | 1.8243 |
| 4/16/2019 21:18 | 1.5417 | 0.5167 | 4.7302 | 1.0167 | 2.942  | 2.9    | 0.1943 | 1.8136 |
| 4/16/2019 21:19 | 1.5333 | 0.9667 | 4.8272 | 1.1417 | 2.918  | 2.9    | 0.2003 | 1.8355 |
| 4/16/2019 21:20 | 1.5    | 1.1667 | 4.5135 | 1.1    | 2.9296 | 2.9    | 0.1886 | 1.8318 |
| 4/16/2019 21:21 | 1.4083 | 1.1333 | 4.5248 | 0.8    | 2.9295 | 2.9    | 0.2002 | 1.8144 |
| 4/16/2019 21:22 | 1.4417 | 1.75   | 4.5815 | 1.1    | 2.9443 | 2.9    | 0.2009 | 1.8176 |
| 4/16/2019 21:23 | 1.5    | 1.5667 | 4.5235 | 1.2083 | 2.9429 | 2.9    | 0.1922 | 1.8406 |

|                 |        |        |        |        |        |        |        |        |
|-----------------|--------|--------|--------|--------|--------|--------|--------|--------|
| 4/16/2019 21:24 | 1.5    | 1.3833 | 4.4642 | 0.7167 | 2.9352 | 2.9    | 0.2013 | 1.867  |
| 4/16/2019 21:25 | 1.4667 | 0.6833 | 4.7937 | 1.1    | 2.9357 | 2.9    | 0.1901 | 1.8358 |
| 4/16/2019 21:26 | 1.4    | 1.25   | 4.6342 | 1.575  | 2.9226 | 2.9    | 0.1938 | 1.8311 |
| 4/16/2019 21:27 | 1.4167 | 1.8    | 4.7485 | 1.1833 | 2.9429 | 2.9545 | 0.1995 | 1.84   |
| 4/16/2019 21:28 | 1.4083 | 1.7667 | 4.6752 | 1.0083 | 2.9463 | 2.9636 | 0.1886 | 1.8197 |
| 4/16/2019 21:29 | 1.4833 | 0.95   | 4.5617 | 1.1667 | 2.9397 | 2.9    | 0.2015 | 1.8395 |
| 4/16/2019 21:30 | 1.4    | 0.95   | 4.4617 | 0.55   | 2.9339 | 2.9636 | 0.1884 | 1.8523 |
| 4/16/2019 21:31 | 1.4    | 1.4167 | 4.5818 | 1.175  | 2.9278 | 3      | 0.1955 | 1.8495 |
| 4/16/2019 21:32 | 1.4    | 1.75   | 4.9495 | 1.525  | 2.9323 | 3      | 0.2003 | 1.849  |
| 4/16/2019 21:33 | 1.4    | 1.1667 | 4.4637 | 1.3417 | 2.9454 | 3      | 0.1898 | 1.8281 |
| 4/16/2019 21:34 | 1.45   | 1      | 4.554  | 1.225  | 2.9441 | 2.9727 | 0.2042 | 1.8325 |
| 4/16/2019 21:35 | 1.4    | 0.8333 | 4.487  | 1.425  | 2.9467 | 2.9636 | 0.1895 | 1.8197 |
| 4/16/2019 21:36 | 1.4    | 0.6833 | 4.7678 | 1.175  | 2.9503 | 2.925  | 0.2012 | 1.8069 |
| 4/16/2019 21:37 | 1.4    | 0.9833 | 4.7312 | 1.45   | 2.9667 | 2.9909 | 0.2032 | 1.8436 |
| 4/16/2019 21:38 | 1.4    | 1.05   | 4.527  | 1.375  | 2.9483 | 3      | 0.1916 | 1.8515 |
| 4/16/2019 21:39 | 1.4583 | 0.6667 | 4.6977 | 1.2083 | 2.939  | 2.9455 | 0.2054 | 1.8763 |
| 4/16/2019 21:40 | 1.4583 | 0.9333 | 4.713  | 0.75   | 2.9542 | 2.9083 | 0.1829 | 1.8335 |
| 4/16/2019 21:41 | 1.5    | 1.3667 | 5.0763 | 1.375  | 2.9578 | 3      | 0.2016 | 1.8281 |
| 4/16/2019 21:42 | 1.5    | 1.1667 | 4.5892 | 1.025  | 2.9683 | 3      | 0.1931 | 1.8214 |
| 4/16/2019 21:43 | 1.5    | 1.1167 | 4.555  | 1.1417 | 2.9622 | 2.9727 | 0.1913 | 1.8398 |
| 4/16/2019 21:44 | 1.5    | 1.0833 | 4.5053 | 1.1417 | 2.9489 | 2.9    | 0.2017 | 1.8484 |
| 4/16/2019 21:45 | 1.55   | 1.6833 | 4.7585 | 1.2667 | 2.9642 | 2.9    | 0.1856 | 1.8123 |
| 4/16/2019 21:46 | 1.6583 | 1.3    | 4.3655 | 0.95   | 2.9827 | 2.9    | 0.2033 | 1.813  |
| 4/16/2019 21:47 | 1.6167 | 1.2167 | 4.678  | 1.4917 | 2.96   | 2.9    | 0.1996 | 1.8129 |
| 4/16/2019 21:48 | 1.6    | 1.3167 | 4.3045 | 0.9167 | 2.9779 | 2.9    | 0.1907 | 1.8125 |
| 4/16/2019 21:49 | 1.625  | 1.0333 | 4.4738 | 1.0667 | 2.9862 | 2.9    | 0.2022 | 1.7954 |
| 4/16/2019 21:50 | 1.7    | 1.1333 | 4.4335 | 0.675  | 2.9711 | 2.9    | 0.1937 | 1.7996 |
| 4/16/2019 21:51 | 1.7    | 0.7167 | 4.5322 | 0.6167 | 2.9719 | 2.9    | 0.2055 | 1.8018 |
| 4/16/2019 21:52 | 1.6917 | 1.3167 | 4.5683 | 1.2083 | 2.9731 | 2.9    | 0.2019 | 1.8263 |
| 4/16/2019 21:53 | 1.675  | 1.45   | 4.6217 | 1.3417 | 2.9875 | 2.9    | 0.1986 | 1.8618 |
| 4/16/2019 21:54 | 1.7    | 1.1333 | 4.5663 | 1.4083 | 2.9926 | 2.9    | 0.2057 | 1.8353 |
| 4/16/2019 21:55 | 1.775  | 1.7    | 4.6825 | 0.7833 | 2.9707 | 2.9    | 0.1888 | 1.8248 |
| 4/16/2019 21:56 | 1.8167 | 1.15   | 4.3582 | 1.3833 | 2.9888 | 2.9    | 0.2053 | 1.8225 |
| 4/16/2019 21:57 | 1.8    | 0.8333 | 4.5527 | 0.55   | 2.9933 | 2.95   | 0.2038 | 1.8053 |
| 4/16/2019 21:58 | 1.775  | 1.45   | 4.2937 | 1.5667 | 2.9833 | 3      | 0.1979 | 1.8364 |
| 4/16/2019 21:59 | 1.725  | 1.4667 | 4.5251 | 1.0333 | 2.9698 | 3      | 0.2067 | 1.8508 |
| 4/16/2019 22:00 | 1.7    | 1      | 4.3611 | 0.6833 | 2.9945 | 3      | 0.1912 | 1.8342 |
| 4/16/2019 22:01 | 1.7    | 0.7667 | 4.4911 | 1.2333 | 2.9665 | 3      | 0.2054 | 1.8182 |
| 4/16/2019 22:02 | 1.7833 | 0.7667 | 4.4454 | 1.05   | 2.9898 | 3      | 0.2014 | 1.8182 |
| 4/16/2019 22:03 | 1.75   | 1.1667 | 4.2638 | 1.4917 | 2.9782 | 3      | 0.2012 | 1.8153 |
| 4/16/2019 22:04 | 1.8    | 1.3333 | 4.5932 | 1.225  | 3.0058 | 3      | 0.2074 | 1.8226 |
| 4/16/2019 22:05 | 1.7333 | 0.8667 | 4.2225 | 0.8833 | 2.9896 | 3      | 0.1989 | 1.8072 |
| 4/16/2019 22:06 | 1.7    | 1.3667 | 4.241  | 1.2083 | 2.9829 | 3      | 0.1996 | 1.8138 |
| 4/16/2019 22:07 | 1.7583 | 0.8833 | 4.6355 | 1.0667 | 3.0083 | 3      | 0.2107 | 1.8394 |
| 4/16/2019 22:08 | 1.7333 | 1.1333 | 4.4752 | 0.8667 | 2.9991 | 3      | 0.1903 | 1.8572 |
| 4/16/2019 22:09 | 1.7    | 1.85   | 4.4904 | 0.725  | 2.9856 | 2.9545 | 0.2061 | 1.8332 |
| 4/16/2019 22:10 | 1.7    | 0.95   | 4.4529 | 0.975  | 3.0014 | 2.9    | 0.1957 | 1.8359 |

|                 |        |        |        |        |        |        |        |        |
|-----------------|--------|--------|--------|--------|--------|--------|--------|--------|
| 4/16/2019 22:11 | 1.7    | 0.8667 | 4.3703 | 0.3667 | 3.001  | 2.9    | 0.2087 | 1.8074 |
| 4/16/2019 22:12 | 1.7    | 1.2667 | 4.226  | 0.3917 | 3.001  | 2.9    | 0.2026 | 1.8013 |
| 4/16/2019 22:13 | 1.7    | 1.5333 | 4.5636 | 0.7833 | 3.0101 | 2.9    | 0.1951 | 1.7811 |
| 4/16/2019 22:14 | 1.675  | 1.0833 | 4.46   | 0.5833 | 3.0126 | 2.8818 | 0.2124 | 1.8061 |
| 4/16/2019 22:15 | 1.6833 | 1.15   | 4.5039 | 0.9167 | 2.9842 | 2.84   | 0.188  | 1.8431 |
| 4/16/2019 22:16 | 1.7    | 1.4833 | 4.3241 | 0.7833 | 3.0263 | 2.9    | 0.2039 | 1.8382 |
| 4/16/2019 22:17 | 1.7    | 1.3667 | 4.2715 | 1.125  | 3.0194 | 2.9    | 0.2033 | 1.8236 |
| 4/16/2019 22:18 | 1.7    | 0.7    | 4.1971 | 0.9083 | 3.0133 | 2.9    | 0.199  | 1.8449 |
| 4/16/2019 22:19 | 1.7    | 0.75   | 4.3755 | 1      | 3.0185 | 2.9    | 0.2055 | 1.8407 |
| 4/16/2019 22:20 | 1.6583 | 0.7333 | 4.5418 | 1.0333 | 2.9943 | 2.9    | 0.1941 | 1.81   |
| 4/16/2019 22:21 | 1.6    | 0.75   | 4.6821 | 0.7667 | 3.0069 | 2.9    | 0.2033 | 1.7893 |
| 4/16/2019 22:22 | 1.5667 | 0.9167 | 4.265  | 1.4417 | 3.0128 | 2.9    | 0.1966 | 1.7953 |
| 4/16/2019 22:23 | 1.575  | 0.3    | 4.52   | 0.9583 | 3.0132 | 2.9    | 0.2012 | 1.8138 |
| 4/16/2019 22:24 | 1.6    | 1.7167 | 4.1873 | 1.6083 | 3.0013 | 2.9    | 0.2055 | 1.8073 |
| 4/16/2019 22:25 | 1.6    | 1.2833 | 4.3009 | 1.325  | 3.0078 | 2.9    | 0.1923 | 1.8254 |
| 4/16/2019 22:26 | 1.6    | 1.0667 | 4.4625 | 1.4083 | 3.0029 | 2.9    | 0.2079 | 1.823  |
| 4/16/2019 22:27 | 1.6083 | 1.6833 | 4.3671 | 1.6    | 2.9998 | 2.9    | 0.1955 | 1.8105 |
| 4/16/2019 22:28 | 1.7    | 1.1833 | 4.6095 | 1.3083 | 2.9846 | 2.9    | 0.1981 | 1.8198 |
| 4/16/2019 22:29 | 1.7    | 1.2667 | 4.2793 | 1.15   | 2.989  | 2.9    | 0.2064 | 1.8188 |
| 4/16/2019 22:30 | 1.625  | 1.3333 | 4.7179 | 1.6    | 2.9769 | 2.9    | 0.1918 | 1.819  |
| 4/16/2019 22:31 | 1.6    | 1.8167 | 4.5093 | 1.4833 | 2.9861 | 2.9    | 0.2074 | 1.8078 |
| 4/16/2019 22:32 | 1.6    | 1.95   | 4.5957 | 1.25   | 2.9783 | 2.99   | 0.2005 | 1.8245 |
| 4/16/2019 22:33 | 1.6    | 0.7667 | 4.2694 | 0.8417 | 2.9844 | 2.93   | 0.195  | 1.8364 |
| 4/16/2019 22:34 | 1.7    | 1.3667 | 4.4113 | 1.075  | 2.9679 | 2.9    | 0.1997 | 1.8276 |
| 4/16/2019 22:35 | 1.6583 | 0.95   | 4.3028 | 0.9833 | 2.975  | 2.9    | 0.194  | 1.8101 |
| 4/16/2019 22:36 | 1.6833 | 1.5833 | 4.4538 | 1.5917 | 2.9659 | 2.9    | 0.202  | 1.8289 |
| 4/16/2019 22:37 | 1.625  | 0.8333 | 4.4723 | 1.4917 | 2.9834 | 2.9556 | 0.1965 | 1.8283 |
| 4/16/2019 22:38 | 1.6417 | 1.55   | 4.592  | 1.6833 | 2.9729 | 2.9818 | 0.1923 | 1.8553 |
| 4/16/2019 22:39 | 1.6833 | 1.0333 | 4.6545 | 1.2167 | 2.9665 | 2.9091 | 0.204  | 1.8353 |
| 4/16/2019 22:40 | 1.7    | 1.8167 | 4.6006 | 0.9583 | 2.9691 | 2.92   | 0.1862 | 1.8036 |
| 4/16/2019 22:41 | 1.8    | 0.6333 | 4.2422 | 0.9833 | 2.9382 | 3      | 0.2049 | 1.7948 |
| 4/16/2019 22:42 | 1.75   | 1.25   | 4.4411 | -0.075 | 2.9544 | 3      | 0.1959 | 1.7908 |
| 4/16/2019 22:43 | 1.7    | 1.2333 | 4.5765 | 1.4417 | 2.9498 | 2.9727 | 0.202  | 1.8248 |
| 4/16/2019 22:44 | 1.6833 | 1.55   | 4.6061 | 0.875  | 2.9259 | 2.9364 | 0.1997 | 1.8441 |
| 4/16/2019 22:45 | 1.6083 | 0.9    | 4.4528 | 0.75   | 2.9383 | 3      | 0.197  | 1.7973 |
| 4/16/2019 22:46 | 1.6    | 1.2333 | 4.3675 | 0.95   | 2.9306 | 3      | 0.2018 | 1.7961 |
| 4/16/2019 22:47 | 1.6    | 1.3833 | 4.4287 | 1.2083 | 2.9296 | 3.01   | 0.1894 | 1.8318 |
| 4/16/2019 22:48 | 1.6833 | 1.5    | 4.7153 | 1.35   | 2.9053 | 3.0091 | 0.1937 | 1.8154 |
| 4/16/2019 22:49 | 1.7    | 1.9833 | 4.5627 | 1.8833 | 2.9195 | 3      | 0.2    | 1.8323 |
| 4/16/2019 22:50 | 1.6917 | 0.9167 | 4.4524 | 1.5167 | 2.9068 | 3      | 0.1886 | 1.8084 |
| 4/16/2019 22:51 | 1.6083 | 1.2833 | 4.5133 | 1.2167 | 2.9185 | 3      | 0.203  | 1.8323 |
| 4/16/2019 22:52 | 1.5917 | 0.95   | 4.4436 | 1.65   | 2.9116 | 3      | 0.1977 | 1.8296 |
| 4/16/2019 22:53 | 1.6    | 1.2333 | 4.4379 | 1.225  | 2.8941 | 3      | 0.1958 | 1.8082 |
| 4/16/2019 22:54 | 1.575  | 1.0833 | 4.5563 | 0.975  | 2.9036 | 3      | 0.1983 | 1.7926 |
| 4/16/2019 22:55 | 1.5917 | 0.6    | 4.6046 | 1.0833 | 2.892  | 3      | 0.1871 | 1.8145 |
| 4/16/2019 22:56 | 1.5583 | 1.1667 | 4.5543 | 1.3833 | 2.8746 | 3      | 0.2019 | 1.8236 |
| 4/16/2019 22:57 | 1.6    | 1.2333 | 4.1152 | 1.4917 | 2.8734 | 3      | 0.1864 | 1.8368 |

|                 |        |        |        |        |        |        |        |        |
|-----------------|--------|--------|--------|--------|--------|--------|--------|--------|
| 4/16/2019 22:58 | 1.6    | 1.9333 | 4.3306 | 0.7583 | 2.8808 | 2.93   | 0.1986 | 1.8297 |
| 4/16/2019 22:59 | 1.6    | 0.7    | 4.369  | 1.4083 | 2.8715 | 2.9    | 0.1988 | 1.833  |
| 4/16/2019 23:00 | 1.6    | 1.2    | 4.3001 | 1.0917 | 2.8594 | 2.9    | 0.195  | 1.868  |
| 4/16/2019 23:01 | 1.65   | 1.0333 | 4.3714 | 1.575  | 2.8493 | 2.9    | 0.2068 | 1.8385 |
| 4/16/2019 23:02 | 1.7    | 1.8    | 4.5123 | 1.725  | 2.8365 | 2.9    | 0.191  | 1.8504 |
| 4/16/2019 23:03 | 1.6917 | 0.2667 | 4.2231 | 1.2083 | 2.8428 | 2.9    | 0.2    | 1.8624 |
| 4/16/2019 23:04 | 1.6167 | 1.35   | 4.2743 | 1.4167 | 2.844  | 2.9    | 0.1968 | 1.8433 |
| 4/16/2019 23:05 | 1.6417 | 1.8    | 4.4178 | 1.3833 | 2.8243 | 2.9    | 0.1905 | 1.8535 |
| 4/16/2019 23:06 | 1.7    | 1.5833 | 4.2918 | 1.4083 | 2.8234 | 2.9    | 0.2039 | 1.8278 |
| 4/16/2019 23:07 | 1.7167 | 1.0667 | 4.4285 | 1.1583 | 2.8301 | 2.9    | 0.1876 | 1.8203 |
| 4/16/2019 23:08 | 1.725  | 1.2333 | 4.4106 | 0.6083 | 2.8116 | 2.9    | 0.1974 | 1.8223 |
| 4/16/2019 23:09 | 1.7    | 0.7833 | 4.4753 | 0.8083 | 2.8208 | 2.8545 | 0.2005 | 1.7976 |
| 4/16/2019 23:10 | 1.7    | 1.7333 | 4.4663 | 1.3    | 2.8263 | 2.8364 | 0.1986 | 1.8068 |
| 4/16/2019 23:11 | 1.7    | 1.1833 | 4.5558 | 1.1917 | 2.814  | 2.9    | 0.2015 | 1.8283 |
| 4/16/2019 23:12 | 1.7167 | 1.4    | 4.5188 | 1.0083 | 2.811  | 2.9    | 0.1907 | 1.8121 |
| 4/16/2019 23:13 | 1.7    | 1.3167 | 4.466  | 0.7833 | 2.811  | 2.9    | 0.189  | 1.7953 |
| 4/16/2019 23:14 | 1.7    | 2.1    | 4.0857 | 1.325  | 2.7988 | 2.9545 | 0.201  | 1.835  |
| 4/16/2019 23:15 | 1.725  | 1.1    | 4.4175 | 1.0583 | 2.7748 | 3      | 0.1904 | 1.8394 |
| 4/16/2019 23:16 | 1.8    | 1.4333 | 4.5066 | 1.4417 | 2.7723 | 2.9818 | 0.1976 | 1.8065 |
| 4/16/2019 23:17 | 1.7417 | 1.7    | 4.3399 | 1.1083 | 2.7921 | 3      | 0.1807 | 1.81   |
| 4/16/2019 23:18 | 1.6917 | 1.8833 | 4.2833 | 0.975  | 2.7846 | 3      | 0.2051 | 1.7913 |
| 4/16/2019 23:19 | 1.6833 | 1.5    | 4.5519 | 1.3083 | 2.7793 | 3      | 0.1997 | 1.7966 |
| 4/16/2019 23:20 | 1.625  | 2.0333 | 4.2776 | 1.45   | 2.7863 | 3      | 0.1968 | 1.8033 |
| 4/16/2019 23:21 | 1.6    | 1.4    | 4.2878 | 1.4417 | 2.7734 | 3      | 0.2033 | 1.805  |
| 4/16/2019 23:22 | 1.5333 | 1.1333 | 4.2501 | 0.5    | 2.786  | 3      | 0.1833 | 1.8112 |
| 4/16/2019 23:23 | 1.5    | 1.1833 | 4.4511 | 1.35   | 2.8016 | 3      | 0.2067 | 1.8356 |
| 4/16/2019 23:24 | 1.5    | 1.4333 | 4.34   | 0.7    | 2.8046 | 2.9636 | 0.1959 | 1.8337 |
| 4/16/2019 23:25 | 1.55   | 1.4333 | 4.3821 | 1.0917 | 2.7963 | 2.9    | 0.1957 | 1.8178 |
| 4/16/2019 23:26 | 1.5917 | 1.6167 | 4.4713 | 0.9083 | 2.7893 | 2.9    | 0.2011 | 1.8223 |
| 4/16/2019 23:27 | 1.6    | 1.8167 | 4.4497 | 0.875  | 2.7971 | 2.9    | 0.1873 | 1.8368 |
| 4/16/2019 23:28 | 1.5333 | 1.55   | 4.3173 | 0.65   | 2.7954 | 2.9    | 0.2012 | 1.8455 |
| 4/16/2019 23:29 | 1.5167 | 1.2    | 4.4905 | 0.7    | 2.8064 | 2.8455 | 0.189  | 1.8235 |
| 4/16/2019 23:30 | 1.5    | 0.8    | 4.4455 | 1      | 2.8246 | 2.8    | 0.1995 | 1.8162 |
| 4/16/2019 23:31 | 1.5    | 0.5833 | 4.3482 | 1.3667 | 2.8323 | 2.8    | 0.1927 | 1.825  |
| 4/16/2019 23:32 | 1.5    | 1.2    | 4.2487 | 1.4417 | 2.8434 | 2.8    | 0.19   | 1.8404 |
| 4/16/2019 23:33 | 1.5    | 0.6333 | 4.1563 | 1.25   | 2.832  | 2.8    | 0.1995 | 1.8198 |
| 4/16/2019 23:34 | 1.5    | 1.2333 | 4.5268 | 1.4    | 2.8264 | 2.8    | 0.1872 | 1.8214 |
| 4/16/2019 23:35 | 1.5    | 1.7667 | 4.204  | 1.6    | 2.8517 | 2.8    | 0.1915 | 1.8273 |
| 4/16/2019 23:36 | 1.5    | 1.8333 | 4.1727 | 1.4417 | 2.864  | 2.8    | 0.1952 | 1.8433 |
| 4/16/2019 23:37 | 1.4833 | 1.3833 | 4.4952 | 1.325  | 2.8698 | 2.8    | 0.1916 | 1.8535 |
| 4/16/2019 23:38 | 1.4417 | 1.45   | 4.4945 | 1.3667 | 2.8635 | 2.8    | 0.1978 | 1.8646 |
| 4/16/2019 23:39 | 1.5    | 1.3167 | 4.5038 | 1.6417 | 2.8794 | 2.8    | 0.1864 | 1.8438 |
| 4/16/2019 23:40 | 1.5    | 1.1167 | 4.5362 | 1.3    | 2.8602 | 2.8    | 0.1953 | 1.8501 |
| 4/16/2019 23:41 | 1.5    | 1.1667 | 4.4292 | 0.6083 | 2.8772 | 2.8    | 0.1906 | 1.8344 |
| 4/16/2019 23:42 | 1.5583 | 1.4833 | 4.5758 | 1.2833 | 2.9078 | 2.8    | 0.1889 | 1.8311 |
| 4/16/2019 23:43 | 1.6    | 1.6833 | 4.3575 | 1.1917 | 2.8755 | 2.8    | 0.1947 | 1.8202 |
| 4/16/2019 23:44 | 1.6    | 0.5333 | 4.4747 | 1.125  | 2.8879 | 2.8    | 0.186  | 1.8231 |

|                 |        |        |        |        |        |        |        |        |
|-----------------|--------|--------|--------|--------|--------|--------|--------|--------|
| 4/16/2019 23:45 | 1.6    | 1.8167 | 4.5218 | 1.65   | 2.9062 | 2.8    | 0.2054 | 1.8261 |
| 4/16/2019 23:46 | 1.6    | 1.4667 | 4.325  | 0.9083 | 2.8923 | 2.8    | 0.1929 | 1.8457 |
| 4/16/2019 23:47 | 1.6    | 1.2    | 4.3678 | 1.2333 | 2.8736 | 2.8    | 0.1964 | 1.8656 |
| 4/16/2019 23:48 | 1.6    | 1.7    | 4.2725 | 1.0667 | 2.8923 | 2.8    | 0.1915 | 1.8691 |
| 4/16/2019 23:49 | 1.6    | 1.05   | 4.1178 | 0.9917 | 2.8805 | 2.8    | 0.1947 | 1.8612 |
| 4/16/2019 23:50 | 1.6    | 1.3667 | 4.1753 | 0.9833 | 2.8624 | 2.8    | 0.2022 | 1.8376 |
| 4/16/2019 23:51 | 1.5727 | 1.3333 | 4.221  | 0.7583 | 2.8919 | 2.8    | 0.1904 | 1.8373 |
| 4/16/2019 23:52 | 1.5083 | 1.9333 | 4.643  | 1.2167 | 2.9013 | 2.77   | 0.204  | 1.8368 |
| 4/16/2019 23:53 | 1.5    | 1.45   | 4.4408 | 1.3167 | 2.9088 | 2.7727 | 0.187  | 1.8317 |
| 4/16/2019 23:54 | 1.5    | 1.1167 | 4.1753 | 0.95   | 2.9051 | 2.78   | 0.1915 | 1.8438 |
| 4/16/2019 23:55 | 1.5167 | 1.4    | 4.2808 | 0.775  | 2.9098 | 2.7    | 0.1991 | 1.8618 |
| 4/16/2019 23:56 | 1.6    | 2.0667 | 4.3818 | 1.5667 | 2.9053 | 2.7    | 0.193  | 1.8637 |
| 4/16/2019 23:57 | 1.6    | 1.0333 | 4.3795 | 0.875  | 2.9058 | 2.7545 | 0.2017 | 1.8235 |
| 4/16/2019 23:58 | 1.5917 | 2.1167 | 4.2047 | 1.2083 | 2.8883 | 2.8    | 0.1841 | 1.8251 |
| 4/16/2019 23:59 | 1.5083 | 1.45   | 4.3773 | 0.725  | 2.8869 | 2.8    | 0.1948 | 1.8082 |
| 4/17/2019 0:00  | 1.5083 | 1.25   | 4.2667 | 1.4833 | 2.8708 | 2.8    | 0.1954 | 1.8188 |
| 4/17/2019 0:01  | 1.5417 | 1.4333 | 4.3127 | 1.075  | 2.8833 | 2.8    | 0.1904 | 1.8017 |
| 4/17/2019 0:02  | 1.6    | 1.7667 | 4.4177 | 1.8    | 2.8872 | 2.8    | 0.1929 | 1.8197 |
| 4/17/2019 0:03  | 1.6    | 0.7833 | 3.9472 | 1.2167 | 2.8713 | 2.87   | 0.1876 | 1.8227 |
| 4/17/2019 0:04  | 1.6417 | 0.9667 | 4.432  | 1.5417 | 2.8741 | 2.9    | 0.2047 | 1.8407 |
| 4/17/2019 0:05  | 1.6333 | 1.3167 | 4.5135 | 1.175  | 2.8728 | 2.9    | 0.1889 | 1.8229 |
| 4/17/2019 0:06  | 1.7    | 1.1167 | 4.3513 | 1.1083 | 2.8828 | 2.9    | 0.1821 | 1.7893 |
| 4/17/2019 0:07  | 1.6167 | 0.8167 | 4.5823 | 2.0083 | 2.8853 | 2.9    | 0.1951 | 1.7908 |
| 4/17/2019 0:08  | 1.6    | 0.5667 | 4.3328 | 1.05   | 2.8771 | 2.9    | 0.1853 | 1.805  |
| 4/17/2019 0:09  | 1.6    | 1.2333 | 4.4657 | 1.3833 | 2.8748 | 2.9    | 0.1984 | 1.8205 |
| 4/17/2019 0:10  | 1.6    | 1.2833 | 4.4532 | 1.1333 | 2.8678 | 2.88   | 0.1877 | 1.8416 |
| 4/17/2019 0:11  | 1.625  | 1.1833 | 4.2185 | 0.8417 | 2.8706 | 2.89   | 0.1947 | 1.8449 |
| 4/17/2019 0:12  | 1.6    | 1.2833 | 4.4018 | 1.0583 | 2.8713 | 2.8    | 0.2007 | 1.8391 |
| 4/17/2019 0:13  | 1.6    | 1.5167 | 4.324  | 1.0917 | 2.8585 | 2.8    | 0.1815 | 1.8076 |
| 4/17/2019 0:14  | 1.6    | 1.6667 | 4.4117 | 1.55   | 2.859  | 2.8    | 0.1981 | 1.7798 |
| 4/17/2019 0:15  | 1.6    | 1.5    | 4.4295 | 1.1667 | 2.8554 | 2.8    | 0.1906 | 1.8181 |
| 4/17/2019 0:16  | 1.55   | 1.2333 | 4.2253 | 0.7917 | 2.8617 | 2.8    | 0.1951 | 1.8298 |
| 4/17/2019 0:17  | 1.45   | 1.4    | 4.4815 | 1.1083 | 2.8633 | 2.8    | 0.1976 | 1.8345 |
| 4/17/2019 0:18  | 1.4583 | 1.6833 | 4.4998 | 1.35   | 2.8714 | 2.73   | 0.1827 | 1.8186 |
| 4/17/2019 0:19  | 1.5    | 1.3667 | 4.4112 | 1.125  | 2.8728 | 2.8    | 0.1968 | 1.8223 |
| 4/17/2019 0:20  | 1.5833 | 1.1333 | 4.4723 | 1      | 2.8481 | 2.8    | 0.1834 | 1.8118 |
| 4/17/2019 0:21  | 1.5167 | 1.6    | 4.4242 | 1.375  | 2.8556 | 2.8    | 0.1968 | 1.8213 |
| 4/17/2019 0:22  | 1.5    | 1.3833 | 4.2522 | 1.025  | 2.8716 | 2.8    | 0.1854 | 1.8273 |
| 4/17/2019 0:23  | 1.5    | 1.0167 | 4.5457 | 0.9833 | 2.8573 | 2.8    | 0.187  | 1.8436 |
| 4/17/2019 0:24  | 1.5083 | 1.3833 | 4.3838 | 1.25   | 2.8428 | 2.8    | 0.2004 | 1.8203 |
| 4/17/2019 0:25  | 1.5833 | 1.0333 | 4.5413 | 0.7083 | 2.8609 | 2.8    | 0.1899 | 1.812  |
| 4/17/2019 0:26  | 1.6    | 1.2333 | 4.3077 | 0.7083 | 2.8488 | 2.8    | 0.1925 | 1.8208 |
| 4/17/2019 0:27  | 1.6    | 1.3167 | 4.5617 | 1.0583 | 2.8596 | 2.8    | 0.1902 | 1.8189 |
| 4/17/2019 0:28  | 1.6167 | 1.2167 | 4.3097 | 1.1917 | 2.852  | 2.8917 | 0.1806 | 1.8206 |
| 4/17/2019 0:29  | 1.7    | 1.5167 | 4.3955 | 1.2833 | 2.8395 | 2.9    | 0.1968 | 1.846  |
| 4/17/2019 0:30  | 1.6083 | 0.9167 | 4.3365 | 1.3667 | 2.8279 | 2.9    | 0.1915 | 1.8426 |
| 4/17/2019 0:31  | 1.6    | 1.2333 | 4.2718 | 1.1417 | 2.8123 | 2.8    | 0.1875 | 1.8507 |



|                |        |        |        |        |        |        |        |        |
|----------------|--------|--------|--------|--------|--------|--------|--------|--------|
| 4/17/2019 0:32 | 1.6167 | 1.55   | 4.3852 | 1.675  | 2.8287 | 2.8    | 0.1934 | 1.8264 |
| 4/17/2019 0:33 | 1.7    | 1.45   | 4.4553 | 1.2167 | 2.8207 | 2.8    | 0.1849 | 1.8087 |
| 4/17/2019 0:34 | 1.7    | 0.6667 | 3.922  | 0.85   | 2.8058 | 2.8273 | 0.1999 | 1.8108 |
| 4/17/2019 0:35 | 1.675  | 1.7667 | 4.3812 | 1.7583 | 2.8092 | 2.85   | 0.1867 | 1.8098 |
| 4/17/2019 0:36 | 1.6    | 1.1667 | 4.3363 | 1.1417 | 2.8013 | 2.9    | 0.1919 | 1.8259 |
| 4/17/2019 0:37 | 1.6583 | 1.5333 | 4.4938 | 1.3667 | 2.789  | 2.9    | 0.1955 | 1.8368 |
| 4/17/2019 0:38 | 1.7    | 1.1333 | 4.3932 | 0.975  | 2.7906 | 2.91   | 0.1812 | 1.8306 |
| 4/17/2019 0:39 | 1.7    | 2.0333 | 4.3998 | 1.075  | 2.7815 | 2.95   | 0.1999 | 1.8408 |
| 4/17/2019 0:40 | 1.7    | 1.2167 | 4.4442 | 1.3167 | 2.7692 | 2.84   | 0.1813 | 1.8336 |
| 4/17/2019 0:41 | 1.65   | 1.5167 | 4.3002 | 0.7417 | 2.7689 | 2.8    | 0.1894 | 1.8202 |
| 4/17/2019 0:42 | 1.6    | 1.5333 | 4.5013 | 1.2333 | 2.7667 | 2.8    | 0.1907 | 1.8209 |
| 4/17/2019 0:43 | 1.5333 | 1.5667 | 4.3202 | 0.95   | 2.7591 | 2.9    | 0.1854 | 1.8011 |
| 4/17/2019 0:44 | 1.5    | 1.2667 | 4.471  | 0.8417 | 2.753  | 2.9    | 0.1962 | 1.8148 |
| 4/17/2019 0:45 | 1.5    | 1.4333 | 4.246  | 1.4417 | 2.7603 | 2.9    | 0.1839 | 1.8254 |
| 4/17/2019 0:46 | 1.5    | 1.3667 | 4.4533 | 1.175  | 2.7403 | 2.9    | 0.1853 | 1.8309 |
| 4/17/2019 0:47 | 1.5    | 1.3    | 4.6437 | 1.6333 | 2.7228 | 2.9    | 0.1931 | 1.7953 |
| 4/17/2019 0:48 | 1.6    | 0.7333 | 4.5817 | 0.8833 | 2.7161 | 2.8222 | 0.1794 | 1.8268 |
| 4/17/2019 0:49 | 1.6    | 1.3167 | 4.2118 | 1.4833 | 2.7172 | 2.8    | 0.1995 | 1.8253 |
| 4/17/2019 0:50 | 1.5083 | 1.8833 | 4.379  | 1.1417 | 2.7133 | 2.8    | 0.1819 | 1.8203 |
| 4/17/2019 0:51 | 1.5083 | 1.5    | 4.458  | 1.375  | 2.701  | 2.8    | 0.1872 | 1.8078 |
| 4/17/2019 0:52 | 1.5273 | 1.7167 | 4.7153 | 1.125  | 2.7086 | 2.84   | 0.1927 | 1.7998 |
| 4/17/2019 0:53 | 1.575  | 1.95   | 4.4325 | 1.1333 | 2.7    | 2.9    | 0.181  | 1.7916 |
| 4/17/2019 0:54 | 1.5833 | 1.7    | 4.433  | 1.05   | 2.7021 | 2.9    | 0.1923 | 1.8273 |
| 4/17/2019 0:55 | 1.5    | 1.3167 | 4.6328 | 0.875  | 2.6782 | 2.8273 | 0.1825 | 1.8261 |
| 4/17/2019 0:56 | 1.5083 | 1.35   | 4.4355 | 1.3333 | 2.689  | 2.8    | 0.1881 | 1.815  |
| 4/17/2019 0:57 | 1.525  | 1.4667 | 4.5225 | 1.0333 | 2.6703 | 2.8    | 0.1902 | 1.8298 |
| 4/17/2019 0:58 | 1.625  | 1.2333 | 4.5893 | 1.75   | 2.6597 | 2.8    | 0.1829 | 1.822  |
| 4/17/2019 0:59 | 1.7    | 1.4667 | 4.427  | 1.3083 | 2.6577 | 2.8    | 0.194  | 1.8443 |
| 4/17/2019 1:00 | 1.7    | 1.2    | 4.5511 | 1.3833 | 2.6574 | 2.8333 | 0.1817 | 1.8123 |
| 4/17/2019 1:01 | 1.7    | 0.9    | 4.5733 | 1.1083 | 2.661  | 2.9    | 0.1924 | 1.7967 |
| 4/17/2019 1:02 | 1.6833 | 1.6    | 4.4608 | 1.325  | 2.6498 | 2.9    | 0.1931 | 1.7921 |
| 4/17/2019 1:03 | 1.6    | 0.6667 | 4.3735 | 1.3417 | 2.6467 | 2.9    | 0.186  | 1.7872 |
| 4/17/2019 1:04 | 1.6583 | 1.75   | 4.5258 | 1.5083 | 2.6471 | 2.9    | 0.1963 | 1.8031 |
| 4/17/2019 1:05 | 1.7417 | 0.95   | 4.4523 | 1.1917 | 2.6482 | 2.9    | 0.183  | 1.7866 |
| 4/17/2019 1:06 | 1.7833 | 1.3333 | 4.4319 | 1.3583 | 2.6354 | 2.9    | 0.1854 | 1.8202 |
| 4/17/2019 1:07 | 1.725  | 0.85   | 4.4218 | 1.025  | 2.6453 | 3      | 0.1829 | 1.8033 |
| 4/17/2019 1:08 | 1.7    | 1.8667 | 4.5357 | 1.15   | 2.6454 | 3      | 0.1804 | 1.7913 |
| 4/17/2019 1:09 | 1.7    | 1.4667 | 4.6078 | 1.3083 | 2.6526 | 3.0364 | 0.1927 | 1.8058 |
| 4/17/2019 1:10 | 1.7167 | 1.6167 | 4.4787 | 1.3083 | 2.6683 | 3.1    | 0.1805 | 1.7923 |
| 4/17/2019 1:11 | 1.775  | 1.5833 | 4.4299 | 1.5667 | 2.674  | 3.1111 | 0.1871 | 1.8293 |
| 4/17/2019 1:12 | 1.8    | 1.2    | 4.5193 | 1.825  | 2.6917 | 3.2    | 0.1868 | 1.8376 |
| 4/17/2019 1:13 | 1.8    | 1.2167 | 4.5088 | 1.525  | 2.6963 | 3.2    | 0.1816 | 1.8191 |
| 4/17/2019 1:14 | 1.8    | 1.7833 | 4.6193 | 1.6417 | 2.7079 | 3.2083 | 0.1902 | 1.8129 |
| 4/17/2019 1:15 | 1.7083 | 1.4167 | 4.4293 | 1      | 2.711  | 3.3    | 0.178  | 1.8328 |
| 4/17/2019 1:16 | 1.7    | 1.45   | 4.4583 | 1.3667 | 2.7163 | 3.3    | 0.1965 | 1.8044 |
| 4/17/2019 1:17 | 1.7    | 1.45   | 4.4052 | 1.2583 | 2.7217 | 3.25   | 0.1832 | 1.8105 |
| 4/17/2019 1:18 | 1.7    | 1.45   | 4.53   | 2.0167 | 2.7328 | 3.2    | 0.1815 | 1.8153 |

|                |        |        |        |        |        |        |        |        |
|----------------|--------|--------|--------|--------|--------|--------|--------|--------|
| 4/17/2019 1:19 | 1.725  | 1.6    | 4.3225 | 1.6833 | 2.7452 | 3.2    | 0.1953 | 1.7891 |
| 4/17/2019 1:20 | 1.7083 | 1.4    | 4.6587 | 1.05   | 2.7214 | 3.15   | 0.1817 | 1.7916 |
| 4/17/2019 1:21 | 1.7167 | 1.9333 | 4.0055 | 1.4167 | 2.723  | 3.1    | 0.1945 | 1.8063 |
| 4/17/2019 1:22 | 1.75   | 1.1    | 4.2806 | 1.4167 | 2.7466 | 3.1    | 0.1867 | 1.7974 |
| 4/17/2019 1:23 | 1.7167 | 2.0167 | 4.6095 | 1.3083 | 2.7423 | 3.0364 | 0.1865 | 1.8037 |
| 4/17/2019 1:24 | 1.7417 | 1.6167 | 4.5393 | 1.3833 | 2.7523 | 2.92   | 0.1917 | 1.8013 |
| 4/17/2019 1:25 | 1.75   | 1.2    | 4.3086 | 0.9167 | 2.7656 | 2.9    | 0.1754 | 1.8118 |
| 4/17/2019 1:26 | 1.8    | 1.5667 | 4.2956 | 1.6083 | 2.7586 | 2.9    | 0.1992 | 1.7923 |
| 4/17/2019 1:27 | 1.7    |        | 4.4507 | 1.5167 | 2.7917 | 2.9    | 0.1805 | 1.7835 |
| 4/17/2019 1:28 | 1.625  |        | 4.4888 | 1.2833 | 2.7948 | 2.91   | 0.1879 | 1.7857 |
| 4/17/2019 1:29 | 1.6    | 1.15   | 4.3317 | 1.4    | 2.7926 | 3      | 0.194  | 1.8081 |
| 4/17/2019 1:30 | 1.6    |        | 4.4444 | 1.55   | 2.7908 | 3      | 0.1835 | 1.8212 |
| 4/17/2019 1:31 | 1.6417 |        | 4.539  | 1.4833 | 2.787  | 3      | 0.1938 | 1.7886 |
| 4/17/2019 1:32 | 1.7    |        | 4.4923 | 0.8667 | 2.7757 | 3.0364 | 0.184  | 1.7973 |
| 4/17/2019 1:33 | 1.7    |        | 4.1588 | 1.65   | 2.8158 | 3.0333 | 0.1908 | 1.7795 |
| 4/17/2019 1:34 | 1.7    |        | 4.4002 | 1.325  | 2.8149 | 3      | 0.1894 | 1.7905 |
| 4/17/2019 1:35 | 1.7    |        | 4.3335 | 1.4083 | 2.7721 | 3.0667 | 0.1777 | 1.7846 |
| 4/17/2019 1:36 | 1.7    |        | 4.4452 | 1.8917 | 2.7775 | 3.1    | 0.1934 | 1.7857 |
| 4/17/2019 1:37 | 1.7083 |        | 4.1714 | 1.1333 | 2.8063 | 3.0091 | 0.1804 | 1.8119 |
| 4/17/2019 1:38 | 1.7    |        | 4.0778 | 1.8583 | 2.8119 | 3.1    | 0.1848 | 1.7939 |
| 4/17/2019 1:39 | 1.6917 |        | 4.3111 | 1.1583 | 2.815  | 3.1556 | 0.1905 | 1.7943 |
| 4/17/2019 1:40 | 1.6833 |        | 4.4073 | 1.5833 | 2.8239 | 3.625  | 0.1813 | 1.8235 |
| 4/17/2019 1:41 | 1.7    |        | 4.2462 | 0.9667 | 2.8052 | 3.93   | 0.1896 | 1.8393 |
| 4/17/2019 1:42 | 1.6417 |        | 4.3438 | 0.7333 | 2.79   | 3.975  | 0.1735 | 1.8127 |
| 4/17/2019 1:43 | 1.6    |        | 4.3223 | 1.4833 | 2.8184 | 4      | 0.1955 | 1.813  |
| 4/17/2019 1:44 | 1.6    |        | 4.4308 | 1.5    | 2.8133 | 4      | 0.1873 | 1.8138 |
| 4/17/2019 1:45 | 1.7    |        | 4.3263 | 1.3    | 2.8132 | 3.94   | 0.1786 | 1.799  |
| 4/17/2019 1:46 | 1.7    |        | 4.4763 | 1.3417 | 2.7946 | 4      | 0.1946 | 1.7754 |
| 4/17/2019 1:47 | 1.7333 |        | 4.2463 | 1.1417 | 2.8218 | 4      | 0.1763 | 1.7905 |
| 4/17/2019 1:48 | 1.8    |        | 4.2771 | 1.0333 | 2.8393 | 3.96   | 0.1851 | 1.7982 |
| 4/17/2019 1:49 | 1.8    |        | 4.4031 | 0.6833 | 2.8099 | 3.99   | 0.1869 | 1.8079 |
| 4/17/2019 1:50 | 1.8    | 1.3143 | 4.3838 | 1.1    | 2.79   | 3.9167 | 0.181  | 1.8326 |
| 4/17/2019 1:51 | 1.8    | 1.22   | 4.6122 | 1.15   | 2.8152 | 3.94   | 0.19   | 1.8418 |
| 4/17/2019 1:52 | 1.8    | 1.5167 | 4.3343 | 1.5417 | 2.798  | 3.5833 | 0.1728 | 1.8463 |
| 4/17/2019 1:53 | 1.7083 | 1.825  | 4.2746 | 0.8833 | 2.799  | 3.1111 | 0.1927 | 1.8163 |
| 4/17/2019 1:54 | 1.7    | 0.9    | 4.3528 | 1.2    | 2.8138 | 3      | 0.1837 | 1.789  |
| 4/17/2019 1:55 | 1.7    | 0.8583 | 4.2416 | 1.3583 | 2.806  | 3      | 0.1886 | 1.8232 |
| 4/17/2019 1:56 | 1.7    | 1.2833 | 4.431  | 1.0917 | 2.8017 | 3      | 0.1962 | 1.8284 |
| 4/17/2019 1:57 | 1.65   | 1.1667 | 4.0841 | 1.0083 | 2.792  | 3      | 0.1786 | 1.8183 |
| 4/17/2019 1:58 | 1.6583 | 1.525  | 4.4518 | 0.8417 | 2.7953 | 2.9182 | 0.1877 | 1.8463 |
| 4/17/2019 1:59 | 1.7    | 0.8917 | 4.4108 | 0.7917 | 2.8029 | 2.9182 | 0.1824 | 1.8284 |
| 4/17/2019 2:00 | 1.7    | 1.5    | 4.4878 | 0.675  | 2.8099 | 3      | 0.1799 | 1.7808 |
| 4/17/2019 2:01 | 1.675  | 1.5167 | 4.3893 | 0.9583 | 2.7938 | 3      | 0.1922 | 1.7958 |
| 4/17/2019 2:02 | 1.6364 | 0.9917 | 4.3584 | 1.6083 | 2.8208 | 3      | 0.1783 | 1.818  |
| 4/17/2019 2:03 | 1.6    | 1.375  | 4.0043 | 1.6167 | 2.7973 | 2.9083 | 0.1859 | 1.8157 |
| 4/17/2019 2:04 | 1.6    | 1.5917 | 4.101  | 0.9    | 2.8218 | 2.9455 | 0.187  | 1.8273 |
| 4/17/2019 2:05 | 1.5417 | 1.5917 | 4.1909 | 1.1917 | 2.8265 | 2.94   | 0.1804 | 1.8135 |

|                |        |         |        |        |        |        |        |        |
|----------------|--------|---------|--------|--------|--------|--------|--------|--------|
| 4/17/2019 2:06 | 1.5083 | 1.275   | 4.0486 | 0.8917 | 2.8339 | 2.9    | 0.1884 | 1.7962 |
| 4/17/2019 2:07 | 1.5    | 1.1583  | 4.0274 | 1      | 2.8178 | 2.9    | 0.1808 | 1.8235 |
| 4/17/2019 2:08 | 1.5    | 0.6583  | 4.1786 | 1.475  | 2.8458 | 2.9    | 0.1897 | 1.8268 |
| 4/17/2019 2:09 | 1.5    | 1.2333  | 3.9003 | 0.8833 | 2.8533 | 2.9    | 0.1864 | 1.8284 |
| 4/17/2019 2:10 | 1.5333 | 1       | 4.0446 | 1.1083 | 2.8437 | 2.96   | 0.1799 | 1.8247 |
| 4/17/2019 2:11 | 1.5    | 1.4083  | 4.0563 | 1.2667 | 2.8673 | 3.1    | 0.1893 | 1.7855 |
| 4/17/2019 2:12 | 1.45   | 1.4333  | 3.8182 | 0.8083 | 2.8603 | 3.05   | 0.175  | 1.7931 |
| 4/17/2019 2:13 | 1.4083 | 1.6417  | 4.4013 | 1.1417 | 2.874  | 3.03   | 0.1875 | 1.8043 |
| 4/17/2019 2:14 | 1.4167 | 1.3333  | 4.3605 | 1.275  | 2.8967 | 3.1    | 0.1785 | 1.8001 |
| 4/17/2019 2:15 | 1.4917 | 1.6417  | 4.218  | 0.9    | 2.8975 | 3.1    | 0.1846 | 1.7897 |
| 4/17/2019 2:16 | 1.425  | 0.9833  | 4.2041 | 0.6167 | 2.904  | 3.0778 | 0.1916 | 1.8168 |
| 4/17/2019 2:17 | 1.3917 | 1.1333  | 4.0149 | 1.2667 | 2.905  | 3      | 0.1767 | 1.8309 |
| 4/17/2019 2:18 | 1.3    | 1.6167  | 3.7353 | 1      | 2.8862 | 3.04   | 0.188  | 1.8175 |
| 4/17/2019 2:19 | 1.3    | 1.4917  | 4.0933 | 0.5833 | 2.8908 | 3.1    | 0.1783 | 1.7963 |
| 4/17/2019 2:20 | 1.3    | 1.5833  | 4.1263 | 1.2333 | 2.9022 | 3.1    | 0.1866 | 1.8023 |
| 4/17/2019 2:21 | 1.3917 | 1.4083  | 4.223  | 1.4583 | 2.9134 | 3.1    | 0.1842 | 1.7843 |
| 4/17/2019 2:22 | 1.4    | 1.4917  | 3.9737 | 0.85   | 2.9071 | 3.0364 | 0.1781 | 1.8138 |
| 4/17/2019 2:23 | 1.45   | 0.825   | 4.2504 | 1.075  | 2.9238 | 2.9    | 0.1907 | 1.7998 |
| 4/17/2019 2:24 | 1.4    | 1.45    | 4.0143 | 1.1583 | 2.9058 | 2.8417 | 0.1787 | 1.7997 |
| 4/17/2019 2:25 | 1.4    | 1.375   | 4.2019 | 1.1417 | 2.9193 | 2.8667 | 0.1822 | 1.8085 |
| 4/17/2019 2:26 | 1.4    | 1.6917  | 4.3203 | 1.05   | 2.9079 | 2.825  | 0.184  | 1.8103 |
| 4/17/2019 2:27 | 1.4167 | 0.825   | 4.3969 | 1.3417 | 2.924  | 2.8    | 0.1786 | 1.8124 |
| 4/17/2019 2:28 | 1.475  | 1.2083  | 4.2343 | 1.25   | 2.9162 | 2.8    | 0.1901 | 1.8291 |
| 4/17/2019 2:29 | 1.475  | 1.175   | 4.1753 | 1.325  | 2.9075 | 2.8    | 0.1746 | 1.8162 |
| 4/17/2019 2:30 | 1.425  | -0.2667 | 3.9902 | 1.1333 | 2.8893 | 2.8    | 0.1845 | 1.8118 |
| 4/17/2019 2:31 | 1.4    | 0.9583  | 4.196  | 1.275  | 2.9285 | 2.7182 | 0.1852 | 1.7852 |
| 4/17/2019 2:32 | 1.4909 | 1.3083  | 4.2067 | 1.5667 | 2.9167 | 2.7    | 0.1821 | 1.7639 |
| 4/17/2019 2:33 | 1.4417 | 1.0417  | 4.0682 | 1.6667 | 2.9167 | 2.7    | 0.187  | 1.77   |
| 4/17/2019 2:34 | 1.45   | 1.7     | 4.1337 | 1.3417 | 2.9353 | 2.7    | 0.1721 | 1.7742 |
| 4/17/2019 2:35 | 1.475  | 1.3667  | 4.216  | 1.25   | 2.9391 | 2.7    | 0.189  | 1.8255 |
| 4/17/2019 2:36 | 1.55   | 0.9583  | 3.9767 | 1.0417 | 2.9258 | 2.7    | 0.1763 | 1.8254 |
| 4/17/2019 2:37 | 1.5167 | 1.1     | 4.1488 | 1.1333 | 2.9257 | 2.7    | 0.18   | 1.8163 |
| 4/17/2019 2:38 | 1.5    | 0.625   | 3.9555 | 1.2833 | 2.9205 | 2.7    | 0.1861 | 1.7954 |
| 4/17/2019 2:39 | 1.4333 | 0.575   | 3.9682 | 1.3167 | 2.9053 | 2.7    | 0.1784 | 1.7933 |
| 4/17/2019 2:40 | 1.4917 | 1.0083  | 4.2388 | 0.65   | 2.8958 | 2.7    | 0.1882 | 1.8024 |
| 4/17/2019 2:41 | 1.4833 | 1.3917  | 4.1355 | 0.7083 | 2.9016 | 2.7    | 0.1782 | 1.8046 |
| 4/17/2019 2:42 | 1.5    | 1.15    | 4.0217 | 0.825  | 2.8934 | 2.7    | 0.181  | 1.7985 |
| 4/17/2019 2:43 | 1.5    | 0.3167  | 4.2558 | 1.05   | 2.9083 | 2.73   | 0.1863 | 1.8035 |
| 4/17/2019 2:44 | 1.5    | 0.95    | 4.1565 | 1.0083 | 2.8992 | 2.7333 | 0.1732 | 1.7902 |
| 4/17/2019 2:45 | 1.5667 | 1.325   | 3.9583 | 0.25   | 2.9316 | 2.7    | 0.1867 | 1.7784 |
| 4/17/2019 2:46 | 1.575  | 1.2583  | 3.9988 | 1.0667 | 2.9046 | 2.7    | 0.1814 | 1.7763 |
| 4/17/2019 2:47 | 1.5    | 1.1083  | 3.8647 | 1.9583 | 2.8864 | 2.7    | 0.1806 | 1.7748 |
| 4/17/2019 2:48 | 1.5    | 1.0833  | 3.7825 | 1.3    | 2.9026 | 2.7545 | 0.1899 | 1.7988 |
| 4/17/2019 2:49 | 1.4083 | 0.9     | 3.838  | 0.9167 | 2.8884 | 2.8    | 0.1785 | 1.8305 |
| 4/17/2019 2:50 | 1.4    | 1.475   | 4.0143 | 0.9667 | 2.8827 | 2.825  | 0.1892 | 1.7958 |
| 4/17/2019 2:51 | 1.4    | 0.9083  | 4.311  | 1.3083 | 2.8814 | 3.0091 | 0.1773 | 1.8024 |
| 4/17/2019 2:52 | 1.4    | 1.3417  | 4.0397 | 1.5417 | 2.8976 | 3.5083 | 0.1789 | 1.8127 |

|                |        |        |        |        |        |        |        |        |
|----------------|--------|--------|--------|--------|--------|--------|--------|--------|
| 4/17/2019 2:53 | 1.4583 | 1.4833 | 4.2922 | 0.65   | 2.8843 | 3.8909 | 0.1838 | 1.8137 |
| 4/17/2019 2:54 | 1.5    | 0.5417 | 4.0635 | 0.9917 | 2.887  | 3.9    | 0.1714 | 1.8051 |
| 4/17/2019 2:55 | 1.5    | 1.475  | 3.9943 | 0.9917 | 2.8692 | 3.9    | 0.1845 | 1.7941 |
| 4/17/2019 2:56 | 1.4833 | 1.25   | 4.2235 | 1.0083 | 2.8773 | 3.9    | 0.1736 | 1.7729 |
| 4/17/2019 2:57 | 1.4167 | 1.375  | 4.114  | 1.0333 | 2.8613 | 3.9    | 0.1841 | 1.7818 |
| 4/17/2019 2:58 | 1.4833 | 1.1    | 4.183  | 1.1667 | 2.865  | 3.9    | 0.1865 | 1.7779 |
| 4/17/2019 2:59 | 1.5    | 0.925  | 4.2627 | 1.0667 | 2.8697 | 4.17   | 0.1771 | 1.8068 |
| 4/17/2019 3:00 | 1.5    | 1.2083 | 4.2905 | 1.3083 | 2.8622 | 4.1636 | 0.1927 | 1.8008 |
| 4/17/2019 3:01 | 1.4667 | 1.35   | 4.122  | 1.0167 | 2.8667 | 4.1182 | 0.179  | 1.7624 |
| 4/17/2019 3:02 | 1.475  | 0.5167 | 3.9837 | 0.7833 | 2.8557 | 4.1545 | 0.1861 | 1.7533 |
| 4/17/2019 3:03 | 1.4083 | 1.25   | 4.2423 | 1.025  | 2.8483 | 4.0273 | 0.1837 | 1.7871 |
| 4/17/2019 3:04 | 1.4    | 0.8667 | 4.1992 | 1.0083 | 2.8453 | 3.64   | 0.1771 | 1.8103 |
| 4/17/2019 3:05 | 1.4    | 1.075  | 3.965  | 1.1833 | 2.8524 | 3.11   | 0.1848 | 1.8063 |
| 4/17/2019 3:06 | 1.4    | 1.6167 | 3.973  | 0.6917 | 2.8476 | 3.0111 | 0.1762 | 1.7878 |
| 4/17/2019 3:07 | 1.4    | 1.2833 | 4.0295 | 0.95   | 2.8535 | 3.18   | 0.182  | 1.7734 |
| 4/17/2019 3:08 | 1.4    | 1.1    | 3.9992 | 0.8167 | 2.8423 | 3.2    | 0.1882 | 1.7404 |
| 4/17/2019 3:09 | 1.4    | 1.0167 | 4.1507 | 0.5833 | 2.826  | 3.2    | 0.1722 | 1.7514 |
| 4/17/2019 3:10 | 1.4    | 0.4667 | 3.9567 | 1.1    | 2.8342 | 3.2    | 0.1884 | 1.787  |
| 4/17/2019 3:11 | 1.4    | 1.525  | 4.1633 | 0.8583 | 2.8406 | 3.0818 | 0.1748 | 1.7945 |
| 4/17/2019 3:12 | 1.325  | 1.3417 | 4.0562 | 1.2    | 2.8337 | 3.02   | 0.1866 | 1.7998 |
| 4/17/2019 3:13 | 1.3417 | 1.2917 | 4.169  | 0.5417 | 2.8276 | 3.1    | 0.1857 | 1.7731 |
| 4/17/2019 3:14 | 1.3    | 0.8667 | 3.954  | 0.65   | 2.8078 | 3.0182 | 0.1752 | 1.783  |
| 4/17/2019 3:15 | 1.3583 | 0.9167 | 4.1947 | 0.95   | 2.8087 | 3      | 0.1895 | 1.7928 |
| 4/17/2019 3:16 | 1.3167 | 1.3167 | 3.895  | 0.65   | 2.833  | 3      | 0.1728 | 1.8121 |
| 4/17/2019 3:17 | 1.3    | 1.3917 | 4.1162 | 1.3333 | 2.836  | 3.06   | 0.183  | 1.7981 |
| 4/17/2019 3:18 | 1.3083 | 1.4083 | 4.2763 | 1.1583 | 2.8371 | 3.1    | 0.1854 | 1.7948 |
| 4/17/2019 3:19 | 1.3833 | 1.425  | 4.0727 | 0.8667 | 2.8437 | 3.0091 | 0.1782 | 1.8048 |
| 4/17/2019 3:20 | 1.4    | 0.9083 | 3.8418 | 0.8833 | 2.8677 | 2.9636 | 0.1921 | 1.7826 |
| 4/17/2019 3:21 | 1.35   | 1.025  | 4.1365 | 0.5917 | 2.8691 | 2.9    | 0.175  | 1.7778 |
| 4/17/2019 3:22 | 1.3833 | 1.4917 | 4.5567 | 1.5833 | 2.9046 | 2.9    | 0.1885 | 1.786  |
| 4/17/2019 3:23 | 1.4    | 1.4    | 4.1722 | 1.025  | 2.8936 | 2.9    | 0.1807 | 1.8087 |
| 4/17/2019 3:24 | 1.4    | 1.3    | 3.8408 | 0.5833 | 2.9053 | 2.9    | 0.179  | 1.8153 |
| 4/17/2019 3:25 | 1.375  | 1.0417 | 3.8285 | 0.2917 | 2.9211 | 2.9    | 0.1839 | 1.8208 |
| 4/17/2019 3:26 | 1.3    | 0.8583 | 3.9125 | 0.95   | 2.9267 | 2.9545 | 0.1765 | 1.7864 |
| 4/17/2019 3:27 | 1.3167 | 0.5167 | 4.3018 | 1.2583 | 2.9813 | 3.1091 | 0.187  | 1.7922 |
| 4/17/2019 3:28 | 1.3083 | 1.1583 | 3.8603 | 1.0333 | 2.9622 | 3.3    | 0.1794 | 1.8104 |
| 4/17/2019 3:29 | 1.3583 | 0.85   | 4.0822 | 0.925  | 3.0383 | 3.3    | 0.1782 | 1.7861 |
| 4/17/2019 3:30 | 1.4    | 1.6833 | 3.9943 | 0.8667 | 3.079  | 3.3    | 0.1881 | 1.7705 |
| 4/17/2019 3:31 | 1.4    | 0.6167 | 4.3678 | 0.1667 | 3.0411 | 3.3818 | 0.1756 | 1.7827 |
| 4/17/2019 3:32 | 1.45   | 0.725  | 3.6942 | 0.9417 | 3.0479 | 3.5    | 0.188  | 1.8025 |
| 4/17/2019 3:33 | 1.4    | 0.8    | 3.8832 | 1.1167 | 3.0742 | 3.5    | 0.1795 | 1.8058 |
| 4/17/2019 3:34 | 1.4083 | 1.375  | 3.7763 | 0.8083 | 3.1043 | 3.5    | 0.1784 | 1.7618 |
| 4/17/2019 3:35 | 1.4333 | 0.85   | 4.0913 | 0.6083 | 3.094  | 3.6    | 0.1857 | 1.7748 |
| 4/17/2019 3:36 | 1.4083 | 0.8667 | 4.2487 | 0.8167 | 3.1001 | 3.8    | 0.1709 | 1.7916 |
| 4/17/2019 3:37 | 1.4    | 1.0167 | 3.8892 | 0.9917 | 3.1318 | 3.8    | 0.1894 | 1.7684 |
| 4/17/2019 3:38 | 1.4    | 1.2167 | 3.9907 | 1.5917 | 3.1138 | 3.74   | 0.1734 | 1.7614 |
| 4/17/2019 3:39 | 1.4    | 0.65   | 3.9273 | 0.5083 | 3.1447 | 3.56   | 0.1805 | 1.7516 |

|                |        |        |        |        |        |        |        |        |
|----------------|--------|--------|--------|--------|--------|--------|--------|--------|
| 4/17/2019 3:40 | 1.3833 | 0.6667 | 3.8068 | 0.6417 | 3.1141 | 3.47   | 0.1852 | 1.7666 |
| 4/17/2019 3:41 | 1.325  | 0.7917 | 4.0077 | 0.925  | 3.1098 | 3.53   | 0.1735 | 1.8228 |
| 4/17/2019 3:42 | 1.3727 | 0.6917 | 3.9223 | 1.0833 | 3.2272 | 3.6    | 0.1863 | 1.7798 |
| 4/17/2019 3:43 | 1.3417 | 1.1333 | 3.9507 | 0.725  | 3.1636 | 3.5545 | 0.1759 | 1.7826 |
| 4/17/2019 3:44 | 1.3    | 1.15   | 3.8678 | 0.4333 | 3.1893 | 3.4    | 0.1848 | 1.7933 |
| 4/17/2019 3:45 | 1.3    | 0.8833 | 4.0693 | 0.4167 | 3.2093 | 3.4    | 0.1873 | 1.7783 |
| 4/17/2019 3:46 | 1.3    | 0.6167 | 4.0165 | 0.8583 | 3.2041 | 3.4    | 0.1754 | 1.7673 |
| 4/17/2019 3:47 | 1.3667 | 1.0417 | 4.2735 | 1.025  | 3.2133 | 3.38   | 0.1926 | 1.779  |
| 4/17/2019 3:48 | 1.3    | 1.05   | 4.0088 | 1.5917 | 3.2334 | 3.2091 | 0.1808 | 1.7778 |
| 4/17/2019 3:49 | 1.3    | 1.125  | 3.8227 | 1.0583 | 3.2136 | 3.1727 | 0.1804 | 1.7663 |
| 4/17/2019 3:50 | 1.3    | 1.125  | 3.9585 | 0.8333 | 3.1945 | 3.14   | 0.1869 | 1.7814 |
| 4/17/2019 3:51 | 1.3    | 0.6    | 4.3668 | 0.625  | 3.2151 | 3.2    | 0.1714 | 1.7893 |
| 4/17/2019 3:52 | 1.2917 | 1.0167 | 3.9433 | 0.8    | 3.2154 | 3.28   | 0.1896 | 1.8247 |
| 4/17/2019 3:53 | 1.2167 | 0.7333 | 3.8693 | 1.15   | 3.2376 | 3.3909 | 0.1848 | 1.7905 |
| 4/17/2019 3:54 | 1.3    | 1.1167 | 3.7895 | 0.5917 | 3.267  | 3.3    | 0.181  | 1.7583 |
| 4/17/2019 3:55 | 1.3    | 1.0333 | 3.8858 | 0.7417 | 3.2168 | 3.3    | 0.1876 | 1.7744 |
| 4/17/2019 3:56 | 1.3    | 1.3833 | 4.0002 | 0.875  | 3.2147 | 3.3    | 0.175  | 1.7794 |
| 4/17/2019 3:57 | 1.3    | 1.1333 | 4.0633 | 0.85   | 3.2155 | 3.3    | 0.183  | 1.7823 |
| 4/17/2019 3:58 | 1.3    | 0.3167 | 3.7708 | 0.5    | 3.2199 | 3.3    | 0.1824 | 1.7564 |
| 4/17/2019 3:59 | 1.2917 | 0.95   | 3.8538 | 0.7917 | 3.2373 | 3.33   | 0.185  | 1.7446 |
| 4/17/2019 4:00 | 1.3    | 1.025  | 4.0883 | 0.675  | 3.2242 | 3.4667 | 0.1853 | 1.7659 |
| 4/17/2019 4:01 | 1.2333 | 1.1083 | 3.9188 | 0.95   | 3.2088 | 3.5    | 0.1763 | 1.7796 |
| 4/17/2019 4:02 | 1.2    | 1.4333 | 4.0098 | 0.925  | 3.2348 | 3.5545 | 0.1867 | 1.7525 |
| 4/17/2019 4:03 | 1.2    | 0.7167 | 4.0738 | 1.1917 | 3.2303 | 3.6    | 0.1771 | 1.7843 |
| 4/17/2019 4:04 | 1.225  | 0.325  | 3.8233 | 0.45   | 3.2058 | 3.4917 | 0.1779 | 1.8101 |
| 4/17/2019 4:05 | 1.3    | 1.2167 | 4.0229 | 1.2583 | 3.1992 | 3.3    | 0.1869 | 1.8058 |
| 4/17/2019 4:06 | 1.3    | 1.3333 | 4.2658 | 0.925  | 3.2113 | 3.3    | 0.1722 | 1.8156 |
| 4/17/2019 4:07 | 1.3917 | 1.0333 | 4.2219 | 0.55   | 3.2097 | 3.3    | 0.1833 | 1.7869 |
| 4/17/2019 4:08 | 1.3167 | 0.8167 | 3.6683 | 0.95   | 3.1972 | 3.45   | 0.1807 | 1.8104 |
| 4/17/2019 4:09 | 1.3    | 0.4667 | 3.2714 | 1      | 3.2209 | 3.5    | 0.1779 | 1.7848 |
| 4/17/2019 4:10 | 1.3083 | 1.0417 | 3.9216 | 0.6833 | 3.2016 | 3.5    | 0.185  | 1.7814 |
| 4/17/2019 4:11 | 1.3833 | 0.8917 | 3.8203 | 1.2083 | 3.2178 | 3.5    | 0.1669 | 1.7983 |
| 4/17/2019 4:12 | 1.4    | 2.225  | 3.8553 | 0.8417 | 3.2016 | 3.36   | 0.1871 | 1.8208 |
| 4/17/2019 4:13 | 1.4    | 0.9417 | 3.7998 | 1.3333 | 3.2097 | 3.32   | 0.1731 | 1.7989 |
| 4/17/2019 4:14 | 1.4    | 0.4583 | 3.9164 | 0.6417 | 3.1874 | 3.4    | 0.1821 | 1.8025 |
| 4/17/2019 4:15 | 1.4    | 0.9    | 4.1371 | 0.9    | 3.1879 | 3.45   | 0.1912 | 1.7849 |
| 4/17/2019 4:16 | 1.3917 | 1.325  | 4.0653 | 1.1583 | 3.1795 | 3.5556 | 0.1779 | 1.7764 |
| 4/17/2019 4:17 | 1.3917 | 1.175  | 4.0707 | 0.6833 | 3.1838 | 3.53   | 0.1889 | 1.7683 |
| 4/17/2019 4:18 | 1.375  | 1.5917 | 3.8826 | 0.8833 | 3.177  | 3.5    | 0.1842 | 1.7713 |
| 4/17/2019 4:19 | 1.3    | 1.6083 | 4.0907 | 0.95   | 3.1754 | 3.5273 | 0.1836 | 1.7886 |
| 4/17/2019 4:20 | 1.3    | 1.2583 | 3.7018 | 0.7167 | 3.1566 | 3.48   | 0.1909 | 1.8069 |
| 4/17/2019 4:21 | 1.3    | 1.1583 | 4.0178 | 0.5583 | 3.1731 | 3.4    | 0.1703 | 1.8173 |
| 4/17/2019 4:22 | 1.2583 | 0.4917 | 3.9771 | 0.7167 | 3.1701 | 3.325  | 0.1876 | 1.8088 |
| 4/17/2019 4:23 | 1.2    | 0.8417 | 4.1347 | 0.4917 | 3.1689 | 3.38   | 0.182  | 1.77   |
| 4/17/2019 4:24 | 1.2    | 0.7917 | 4.0548 | 1.5417 | 3.1583 | 3.44   | 0.1796 | 1.7766 |
| 4/17/2019 4:25 | 1.2333 | 1.0333 | 4.1321 | 1.025  | 3.1653 | 3.57   | 0.186  | 1.7609 |
| 4/17/2019 4:26 | 1.25   | 1.0667 | 3.9162 | 0.5167 | 3.1806 | 3.5818 | 0.1772 | 1.7726 |

|                |        |        |        |         |        |        |        |        |
|----------------|--------|--------|--------|---------|--------|--------|--------|--------|
| 4/17/2019 4:27 | 1.25   | 1.5583 | 4.1153 | 1.0833  | 3.1491 | 3.59   | 0.1865 | 1.763  |
| 4/17/2019 4:28 | 1.2833 | 1.575  | 4.1458 | 0.7333  | 3.1575 | 3.4727 | 0.1778 | 1.7811 |
| 4/17/2019 4:29 | 1.2333 | 1.575  | 3.9427 | 0.4583  | 3.1511 | 3.41   | 0.1782 | 1.807  |
| 4/17/2019 4:30 | 1.2833 | 1.3833 | 3.9966 | 0.3667  | 3.1661 | 3.5    | 0.1876 | 1.8123 |
| 4/17/2019 4:31 | 1.3    | 0.75   | 4.0126 | 0.7167  | 3.1639 | 3.6556 | 0.1754 | 1.8121 |
| 4/17/2019 4:32 | 1.3    | 0.8833 | 4.1133 | 1.2417  | 3.1627 | 3.6    | 0.1904 | 1.824  |
| 4/17/2019 4:33 | 1.3    | 1.3333 | 4.0518 | 0.725   | 3.1578 | 3.6917 | 0.1835 | 1.7946 |
| 4/17/2019 4:34 | 1.25   | 0.925  | 3.9724 | 0.775   | 3.1581 | 3.7    | 0.1793 | 1.8075 |
| 4/17/2019 4:35 | 1.3    | 1.0667 | 3.9911 | 1.125   | 3.1282 | 3.7    | 0.1923 | 1.8344 |
| 4/17/2019 4:36 | 1.2167 | 0.775  | 3.7693 | 0.9167  | 3.1449 | 3.75   | 0.1789 | 1.8353 |
| 4/17/2019 4:37 | 1.1833 | 0.675  | 4.1089 | 0.7917  | 3.1417 | 4.0182 | 0.1813 | 1.8258 |
| 4/17/2019 4:38 | 1.1    | 0.7917 | 4.1056 | 0.475   | 3.1378 | 4.1917 | 0.1884 | 1.8005 |
| 4/17/2019 4:39 | 1.1    | 1.175  | 3.9768 | 1.0833  | 3.1418 | 4.3    | 0.1833 | 1.8044 |
| 4/17/2019 4:40 | 1.125  | 0.8167 | 3.8351 | 1.2667  | 3.135  | 4.3545 | 0.1866 | 1.7899 |
| 4/17/2019 4:41 | 1.2167 | 1.275  | 3.8673 | 0.6833  | 3.1415 | 4.5818 | 0.171  | 1.7843 |
| 4/17/2019 4:42 | 1.3    | 1.2333 | 3.9264 | 0.8     | 3.1582 | 4.6273 | 0.1891 | 1.7757 |
| 4/17/2019 4:43 | 1.4    | 0.8083 | 3.8672 | 0.9917  | 3.1426 | 4.6    | 0.1853 | 1.7763 |
| 4/17/2019 4:44 | 1.3083 | 1.0667 | 3.8533 | 1.15    | 3.1354 | 4.7273 | 0.1818 | 1.7855 |
| 4/17/2019 4:45 | 1.3    | 1.2583 | 3.9866 | 1.2     | 3.1327 | 4.8909 | 0.1893 | 1.7978 |
| 4/17/2019 4:46 | 1.3    | 0.0917 | 4.1197 | 1.0833  | 3.1316 | 4.94   | 0.1704 | 1.8023 |
| 4/17/2019 4:47 | 1.3167 | 1.3833 | 3.8877 | 1.1167  | 3.1282 | 5.0583 | 0.1902 | 1.8013 |
| 4/17/2019 4:48 | 1.3417 | 1.2083 | 3.9056 | 1.1917  | 3.1283 | 5.1583 | 0.1772 | 1.8103 |
| 4/17/2019 4:49 | 1.325  | 0.4583 | 4.0753 | 1.1167  | 3.1151 | 5.1818 | 0.1788 | 1.8059 |
| 4/17/2019 4:50 | 1.3    | 1.3833 | 3.9703 | 0.9917  | 3.1157 | 5      | 0.1914 | 1.8234 |
| 4/17/2019 4:51 | 1.3    | 1.5833 | 3.7059 | 1.1167  | 3.1193 | 5.0455 | 0.1774 | 1.8008 |
| 4/17/2019 4:52 | 1.275  | 0.65   | 3.8784 | 1.45    | 3.108  | 5.19   | 0.1908 | 1.7808 |
| 4/17/2019 4:53 | 1.3    | 0.5083 | 4.1603 | 1.0917  | 3.1183 | 5.0818 | 0.1792 | 1.7831 |
| 4/17/2019 4:54 | 1.3    | 0.675  | 3.832  | 1.1083  | 3.0989 | 5.1455 | 0.1804 | 1.7913 |
| 4/17/2019 4:55 | 1.3    | 1.4833 | 3.8104 | 1.0417  | 3.1101 | 5.2    | 0.184  | 1.8313 |
| 4/17/2019 4:56 | 1.2833 | 0.9    | 3.899  | 1.175   | 3.1023 | 5.12   | 0.1754 | 1.8107 |
| 4/17/2019 4:57 | 1.2    | 0.8833 | 3.9674 | 1.2083  | 3.1145 | 5.2    | 0.1905 | 1.7875 |
| 4/17/2019 4:58 | 1.2    | 1.575  | 4.0481 | 0.8     | 3.108  | 5.5273 | 0.1777 | 1.7943 |
| 4/17/2019 4:59 | 1.2    | 1.2583 | 3.7511 | 0.8917  | 3.1038 | 5.5    | 0.1827 | 1.8265 |
| 4/17/2019 5:00 | 1.175  | 1.2    | 3.6465 | 1.3333  | 3.0996 | 5.6273 | 0.1849 | 1.8294 |
| 4/17/2019 5:01 | 1.1    | 0.7917 | 3.7373 | 1.2     | 3.1263 | 5.5444 | 0.1762 | 1.8364 |
| 4/17/2019 5:02 | 1.1    | 1.2333 | 3.8635 | 0.65    | 3.1391 | 5.72   | 0.1854 | 1.807  |
| 4/17/2019 5:03 | 1.1    | 0.4917 | 4.0326 | 1.0667  | 3.1918 | 5.86   | 0.1676 | 1.8248 |
| 4/17/2019 5:04 | 1.1    | 0.9417 | 3.8116 | 1.2     | 3.1791 | 5.9    | 0.1735 | 1.8123 |
| 4/17/2019 5:05 | 1.0833 | 0.8417 | 3.6637 | 1.0333  | 3.2317 | 5.9    | 0.181  | 1.787  |
| 4/17/2019 5:06 | 1      | 0.7167 | 3.6698 | 0.3917  | 3.26   | 5.7636 | 0.1634 | 1.794  |
| 4/17/2019 5:07 | 1      | 0.7167 | 3.6553 | 0.675   | 3.2742 | 5.5727 | 0.1773 | 1.7868 |
| 4/17/2019 5:08 | 0.975  | 0.65   | 3.5753 | 0.375   | 3.2473 | 5.6    | 0.1708 | 1.7696 |
| 4/17/2019 5:09 | 1      | 0.85   | 3.8296 | 0.6083  | 3.3504 | 5.4273 | 0.1699 | 1.772  |
| 4/17/2019 5:10 | 1      | 1.25   | 3.7193 | 1.1167  | 3.3207 | 4.99   | 0.1769 | 1.7735 |
| 4/17/2019 5:11 | 1      | 1.1583 | 3.6549 | 0.0667  | 3.3514 | 5.0909 | 0.1549 | 1.7529 |
| 4/17/2019 5:12 | 1.0167 | 0.1417 | 3.566  | 0.8083  | 3.3125 | 5.1    | 0.1678 | 1.783  |
| 4/17/2019 5:13 | 1.1    | 0.725  | 3.6973 | -0.0583 | 3.3923 | 5.075  | 0.1618 | 1.7787 |

|                |        |         |        |         |        |        |        |        |
|----------------|--------|---------|--------|---------|--------|--------|--------|--------|
| 4/17/2019 5:14 | 1.15   | 0.5083  | 3.6052 | 0.9333  | 3.4303 | 5      | 0.1556 | 1.7522 |
| 4/17/2019 5:15 | 1.1833 | 1.1667  | 3.6111 | 0.3083  | 3.4823 | 4.9    | 0.1649 | 1.7448 |
| 4/17/2019 5:16 | 1.1583 | 0.25    | 3.3627 | -0.0667 | 3.4218 | 5      | 0.1613 | 1.7291 |
| 4/17/2019 5:17 | 1.1667 | 0.825   | 3.5778 | 0.5167  | 3.4618 | 5      | 0.1614 | 1.7186 |
| 4/17/2019 5:18 | 1.1917 | 0.3     | 3.3283 | 0.4917  | 3.4462 | 5      | 0.1586 | 1.7315 |
| 4/17/2019 5:19 | 1.2    | 0.625   | 3.4418 | 0.7333  | 3.455  | 4.925  | 0.1527 | 1.7243 |
| 4/17/2019 5:20 | 1.1    | 0.7583  | 3.7951 | 0.3583  | 3.4573 | 4.9    | 0.1642 | 1.7196 |
| 4/17/2019 5:21 | 1.1    | 1.0833  | 3.6081 | 1.075   | 3.505  | 4.9    | 0.1474 | 1.7096 |
| 4/17/2019 5:22 | 1.1    | 0.65    | 3.6984 | 0.675   | 3.4468 | 4.9    | 0.1541 | 1.7538 |
| 4/17/2019 5:23 | 1.1167 | 0.45    | 3.6974 | -0.25   | 3.4868 | 4.8667 | 0.1637 | 1.768  |
| 4/17/2019 5:24 | 1.1917 | 0.475   | 3.6833 | 0.525   | 3.4939 | 4.7636 | 0.1481 | 1.7506 |
| 4/17/2019 5:25 | 1.2    | 0.1917  | 3.4664 | 0.625   | 3.5831 | 4.8    | 0.154  | 1.7559 |
| 4/17/2019 5:26 | 1.2    | 0.2333  | 3.6856 | 0.2667  | 3.6208 | 4.6    | 0.1616 | 1.719  |
| 4/17/2019 5:27 | 1.2    | 0.7333  | 3.7838 | 0.725   | 3.5888 | 4.38   | 0.1478 | 1.7365 |
| 4/17/2019 5:28 | 1.1583 | 1.4     | 3.246  | 0.6     | 3.566  | 4.0091 | 0.1609 | 1.7407 |
| 4/17/2019 5:29 | 1.1    | 0.3333  | 3.2891 | 0.4417  | 3.6072 | 4.0182 | 0.1551 | 1.7258 |
| 4/17/2019 5:30 | 1.1    | 0.825   | 3.6415 | 0.575   | 3.6308 | 4.3083 | 0.1471 | 1.7303 |
| 4/17/2019 5:31 | 1.0583 | 0.3667  | 3.6257 | 0.375   | 3.6098 | 4.6727 | 0.161  | 1.7294 |
| 4/17/2019 5:32 | 1      | 0.95    | 3.769  | 0.5667  | 3.5903 | 4.7    | 0.1527 | 1.7493 |
| 4/17/2019 5:33 | 0.9083 | 0.1083  | 3.6197 | 0.7833  | 3.5191 | 4.8091 | 0.1587 | 1.7738 |
| 4/17/2019 5:34 | 0.9    | 0.075   | 3.4922 | 0.4     | 3.5872 | 4.9727 | 0.1592 | 1.7661 |
| 4/17/2019 5:35 | 0.9    | 0.7333  | 3.588  | 0.625   | 3.5621 | 4.9091 | 0.1524 | 1.7553 |
| 4/17/2019 5:36 | 0.9    | 0.2833  | 3.6233 | 0.125   | 3.5938 | 4.9182 | 0.1652 | 1.769  |
| 4/17/2019 5:37 | 0.8    | 0.4583  | 3.529  | 0.15    | 3.5803 | 4.9833 | 0.154  | 1.7584 |
| 4/17/2019 5:38 | 0.8    | 0.2917  | 3.4262 | 0.075   | 3.5821 | 5.2818 | 0.1581 | 1.7717 |
| 4/17/2019 5:39 | 0.8    | 0.5333  | 3.6212 | 0.0917  | 3.6354 | 5.4917 | 0.1695 | 1.7865 |
| 4/17/2019 5:40 | 0.8    | 0.1083  | 3.8382 | 0.4167  | 3.6361 | 5.975  | 0.1516 | 1.7807 |
| 4/17/2019 5:41 | 0.8    | 0.1833  | 3.5063 | -0.0667 | 3.5756 | 6.4091 | 0.1678 | 1.755  |
| 4/17/2019 5:42 | 0.7833 | -0.1333 | 3.4388 | 0.3417  | 3.6218 | 6.63   | 0.1659 | 1.7729 |
| 4/17/2019 5:43 | 0.7917 | 0.2667  | 3.7732 | 0.325   | 3.6589 | 6.2909 | 0.1595 | 1.7692 |
| 4/17/2019 5:44 | 0.8    | 1.1333  | 3.4702 | 0.3833  | 3.701  | 6.4818 | 0.1776 | 1.7778 |
| 4/17/2019 5:45 | 0.7417 | 0.55    | 3.752  | 0.1917  | 3.6581 | 6.5583 | 0.1661 | 1.8002 |
| 4/17/2019 5:46 | 0.7    | -0.2667 | 3.6908 | 0.2     | 3.6895 | 6.3545 | 0.1741 | 1.8201 |
| 4/17/2019 5:47 | 0.7417 | 0.1917  | 3.6633 | 0.0833  | 3.7461 | 6.3909 | 0.1817 | 1.8143 |
| 4/17/2019 5:48 | 0.8    | -0.0417 | 3.7183 | 0.4833  | 3.6753 | 6.3455 | 0.1569 | 1.8077 |
| 4/17/2019 5:49 | 0.8417 | 0.425   | 3.5258 | 0.2917  | 3.7081 | 6.3455 | 0.168  | 1.7794 |
| 4/17/2019 5:50 | 0.8    | 1.0417  | 3.4695 | 0.7417  | 3.6893 | 6.025  | 0.17   | 1.8075 |
| 4/17/2019 5:51 | 0.825  | 0.3333  | 3.6872 | 0.225   | 3.7397 | 5.8909 | 0.1678 | 1.803  |
| 4/17/2019 5:52 | 0.8    | 0.6833  | 3.3825 | 0.0667  | 3.6953 | 5.55   | 0.1768 | 1.7901 |
| 4/17/2019 5:53 | 0.725  | 0.2333  | 3.5562 | -0.15   | 3.6562 | 5.1909 | 0.173  | 1.8149 |
| 4/17/2019 5:54 | 0.7    | 0.2833  | 3.553  | 0.1583  | 3.6942 | 4.8455 | 0.1791 | 1.8068 |
| 4/17/2019 5:55 | 0.7    | 0.7667  | 3.5307 | 0.7333  | 3.7205 | 4.8455 | 0.1769 | 1.8331 |
| 4/17/2019 5:56 | 0.7    | 0.7417  | 3.3643 | 0.0667  | 3.6766 | 5.0083 | 0.1739 | 1.8017 |
| 4/17/2019 5:57 | 0.7    | 0.7167  | 3.5815 | 0.4     | 3.7717 | 4.7273 | 0.1878 | 1.7948 |
| 4/17/2019 5:58 | 0.7167 | 0.8417  | 4.3532 | -0.2083 | 3.7471 | 4.9455 | 0.1682 | 1.7975 |
| 4/17/2019 5:59 | 0.7083 | 0.325   | 3.4127 | 0.6167  | 3.7381 | 5.18   | 0.1835 | 1.8268 |
| 4/17/2019 6:00 | 0.7    | 0.55    | 3.582  | 0.3917  | 3.7053 | 5.6    | 0.1804 | 1.8442 |

|                |        |         |        |         |        |        |        |        |
|----------------|--------|---------|--------|---------|--------|--------|--------|--------|
| 4/17/2019 6:01 | 0.6917 | 0.1     | 3.5478 | 0.1667  | 3.7973 | 5.9833 | 0.1748 | 1.7949 |
| 4/17/2019 6:02 | 0.7    | 0.3333  | 3.6247 | 0.65    | 3.8181 | 6.1    | 0.1845 | 1.8083 |
| 4/17/2019 6:03 | 0.7    | 0.1417  | 3.502  | -0.1917 | 3.8067 | 6.1455 | 0.1755 | 1.8    |
| 4/17/2019 6:04 | 0.7    | 0.75    | 3.6443 | -0.0583 | 3.797  | 6.175  | 0.1801 | 1.7964 |
| 4/17/2019 6:05 | 0.7    | -0.1333 | 3.7155 | 0.475   | 3.7701 | 6.425  | 0.1779 | 1.811  |
| 4/17/2019 6:06 | 0.6    | 0.2     | 3.4013 | 0.8167  | 3.7509 | 6.5667 | 0.1717 | 1.7927 |
| 4/17/2019 6:07 | 0.5417 | 0.6833  | 3.6247 | 0.2417  | 3.8028 | 6.875  | 0.1833 | 1.8255 |
| 4/17/2019 6:08 | 0.6    | 0.1583  | 3.4932 | 0.1167  | 3.8509 | 6.7727 | 0.1697 | 1.8487 |
| 4/17/2019 6:09 | 0.6    | 0.2167  | 3.5053 | 0.3667  | 3.8817 | 7.0833 | 0.1826 | 1.8416 |
| 4/17/2019 6:10 | 0.6    | -0.025  | 3.4778 | 0.3833  | 3.8106 | 7.4455 | 0.1837 | 1.835  |
| 4/17/2019 6:11 | 0.6    | 0.825   | 3.3592 | 0.3     | 3.8592 | 7.5    | 0.1743 | 1.8282 |
| 4/17/2019 6:12 | 0.6    | 0.6333  | 3.3408 | -0.0167 | 4.0053 | 7.4917 | 0.1865 | 1.8001 |
| 4/17/2019 6:13 | 0.6    | 0       | 3.7592 | 0.275   | 4.0082 | 7.57   | 0.1705 | 1.7862 |
| 4/17/2019 6:14 | 0.7    | -0.325  | 3.456  | 0.0583  | 4.1038 | 7.7545 | 0.185  | 1.7959 |
| 4/17/2019 6:15 | 0.7    | 0.3917  | 3.7302 | 0.4333  | 4.2117 | 7.9455 | 0.1758 | 1.7973 |
| 4/17/2019 6:16 | 0.725  | 0.5333  | 3.5147 | 0.5417  | 4.1599 | 8.4083 | 0.1779 | 1.8208 |
| 4/17/2019 6:17 | 0.7    | 0.0417  | 3.5568 | 0.1333  | 4.0884 | 8.9583 | 0.1885 | 1.8293 |
| 4/17/2019 6:18 | 0.7    | 0.6917  | 3.4653 | 0.25    | 4.1004 | 9.4182 | 0.1683 | 1.827  |
| 4/17/2019 6:19 | 0.7    | 0.6333  | 3.4937 | -0.1    | 4.1421 | 9.0364 | 0.1841 | 1.8252 |
| 4/17/2019 6:20 | 0.7    | 0.475   | 3.2418 | 0.5     | 4.094  | 9.0917 | 0.1773 | 1.8524 |
| 4/17/2019 6:21 | 0.7417 | 0.8333  | 3.3693 | 0.7833  | 4.094  | 9.0583 | 0.1752 | 1.8308 |
| 4/17/2019 6:22 | 0.7667 | 0.2917  | 3.5167 | 0.7583  | 4.1337 | 9.0583 | 0.1835 | 1.8229 |
| 4/17/2019 6:23 | 0.8    | -0.1167 | 3.508  | 0.25    | 4.1611 | 9.19   | 0.1758 | 1.8433 |
| 4/17/2019 6:24 | 0.8    | 0.25    | 2.7133 | 0.1083  | 4.0801 | 9.2333 | 0.1854 | 1.8826 |
| 4/17/2019 6:25 | 0.7833 | 0.5     | 3.4218 | 0.2833  | 4.1022 | 9.45   | 0.175  | 1.8729 |
| 4/17/2019 6:26 | 0.7833 | -0.1417 | 3.3703 | 0.9917  | 4.133  | 9.1083 | 0.1743 | 1.8591 |
| 4/17/2019 6:27 | 0.725  | 0.1583  | 2.901  | 0.3     | 4.1483 | 8.87   | 0.1841 | 1.8506 |
| 4/17/2019 6:28 | 0.7417 | 0.65    | 3.6338 | 0.3833  | 4.1933 | 8.6545 | 0.1652 | 1.8651 |
| 4/17/2019 6:29 | 0.775  | 0       | 3.745  | 0.475   | 4.0445 | 8.3818 | 0.1855 | 1.882  |
| 4/17/2019 6:30 | 0.725  | 1.0583  | 3.8373 | 0.2583  | 3.9997 | 7.64   | 0.1741 | 1.879  |
| 4/17/2019 6:31 | 0.7    | -0.2667 | 3.2922 | -0.075  | 3.9988 | 7.6091 | 0.1823 | 1.879  |
| 4/17/2019 6:32 | 0.7    | -0.5333 | 0.7059 | -0.175  | 4.1012 | 7.4833 | 0.1834 | 1.889  |
| 4/17/2019 6:33 | 0.7    | 0.0583  | 3.1143 | 0.175   | 4.1863 | 7.5583 | 0.1712 | 1.8528 |
| 4/17/2019 6:34 | 0.7    | 0.8917  | 3.5063 | 0.6917  | 4.1868 | 7.4333 | 0.1828 | 1.8373 |
| 4/17/2019 6:35 | 0.7    | 0.5833  | 3.6647 | 0.3167  | 4.2385 | 7.65   | 0.1775 | 1.8387 |
| 4/17/2019 6:36 | 0.7    | 0.5167  | 3.4152 | 0.475   | 4.2098 | 7.45   | 0.174  | 1.8544 |
| 4/17/2019 6:37 | 0.7    | 0.3083  | 3.5738 | 0.1583  | 4.2258 | 6.83   | 0.1872 | 1.8597 |
| 4/17/2019 6:38 | 0.7833 | 0.6     | 3.4487 | 1.0083  | 4.1901 | 6.4818 | 0.1698 | 1.8528 |
| 4/17/2019 6:39 | 0.8    | -0.1333 | 3.6457 | 1.1167  | 4.1598 | 6.8083 | 0.18   | 1.8655 |
| 4/17/2019 6:40 | 0.7917 | 0.1833  | 3.386  | 0.6167  | 4.1437 | 7.1545 | 0.1736 | 1.8541 |
| 4/17/2019 6:41 | 0.7167 | -0.15   | 3.4037 | 0.15    | 4.1126 | 6.8909 | 0.1759 | 1.8271 |
| 4/17/2019 6:42 | 0.7167 | 0.0083  | 3.5138 | 0.2917  | 4.1665 | 6.8    | 0.1838 | 1.8084 |
| 4/17/2019 6:43 | 0.7917 | 0.675   | 3.455  | 0.95    | 4.1464 | 6.925  | 0.1694 | 1.8217 |
| 4/17/2019 6:44 | 0.7583 | 1       | 3.7857 | 0.1333  | 4.1711 | 6.97   | 0.1772 | 1.8314 |
| 4/17/2019 6:45 | 0.7    | 0.7417  | 3.4712 | 0.3     | 4.1422 | 6.775  | 0.1772 | 1.8305 |
| 4/17/2019 6:46 | 0.7    | 0.0667  | 3.6285 | 0.3167  | 4.1299 | 6.7364 | 0.1731 | 1.8363 |
| 4/17/2019 6:47 | 0.7    | 0.1083  | 3.3223 | 0.0833  | 4.1243 | 6.25   | 0.1851 | 1.8724 |



|                |        |         |         |         |         |         |        |        |
|----------------|--------|---------|---------|---------|---------|---------|--------|--------|
| 4/17/2019 6:48 | 0.7    | 0.4583  | 3.6997  | 0.8917  | 4.1242  | 6.5636  | 0.1717 | 1.8643 |
| 4/17/2019 6:49 | 0.8    | 0.1333  | 3.7257  | 0.175   | 4.1617  | 6.6     | 0.1747 | 1.8177 |
| 4/17/2019 6:50 | 0.7833 | 0.6583  | 3.0822  | 0.225   | 4.1411  | 6.6273  | 0.1814 | 1.871  |
| 4/17/2019 6:51 | 0.8    | 0.2833  | 3.1693  | 0.0417  | 4.0826  | 6.6     | 0.1705 | 1.8935 |
| 4/17/2019 6:52 | 0.8    | 0.3417  | 4.5522  | 0.875   | 4.0964  | 6.1     | 0.1784 | 1.9117 |
| 4/17/2019 6:53 | 0.8833 | 0.4417  | 3.5527  | -0.075  | 4.1074  | 6       | 0.1738 | 1.8749 |
| 4/17/2019 6:54 | 0.9    | 0.4917  | 3.4262  | 0.3     | 4.0787  | 6.09    | 0.1697 | 1.8641 |
| 4/17/2019 6:55 | 0.8667 | 0.575   | 3.3458  | -0.0333 | 4.0741  | 5.8636  | 0.1786 | 1.8913 |
| 4/17/2019 6:56 | 0.8    | 0.325   | 3.4123  | -0.25   | 4.0708  | 5.875   | 0.1694 | 1.9009 |
| 4/17/2019 6:57 | 0.8    | 0.1833  | 3.4748  | 0.2417  | 4.0679  | 6.1273  | 0.1757 | 1.8849 |
| 4/17/2019 6:58 | 0.8    | 0.2167  | 3.4162  | 0.3333  | 4.069   | 6.2364  | 0.1775 | 1.9197 |
| 4/17/2019 6:59 | 0.85   | 0.7667  | 3.7981  | 0.4167  | 4.0598  | 6.29    | 0.1644 | 1.9135 |
| 4/17/2019 7:00 | 0.9    | 1.5333  | 3.7558  | 0.0917  | 4.1783  | 6.1083  | 0.1828 | 1.9288 |
| 4/17/2019 7:01 | 0.8167 | 0.25    | 6.4563  | -0.2083 | 10.6962 | 7.1     | 0.342  | 1.9719 |
| 4/17/2019 7:02 | 0.7833 | -0.475  | 7.5183  | 0.4417  | 5.9533  | 7.825   | 0.4175 | 1.9607 |
| 4/17/2019 7:03 | 0.6667 | 0.075   | 23.17   | 1.4083  | 11.9914 | 12.0636 | 1.5044 | 2.1108 |
| 4/17/2019 7:04 | 0.5    | -0.175  | 44.4317 | 1.05    | 19.9498 | 55.2417 | 3.3209 | 2.3638 |
| 4/17/2019 7:05 | 0.3417 | -0.0917 | 35.0158 | 0.9083  | 19.8977 | 61.2636 | 2.6458 | 2.2521 |
| 4/17/2019 7:06 | 0.3    | -0.1083 | 33.78   | 0.15    | 18.9163 | 47.6167 | 2.1056 | 2.2229 |
| 4/17/2019 7:07 | 0.3    | -0.1083 | 30.2375 | 0.0583  | 18.2657 | 44.3455 | 2.0063 | 2.2282 |
| 4/17/2019 7:08 | 0.2333 | -0.3167 | 27.9625 | 0.2583  | 17.9096 | 48.1417 | 1.8575 | 2.2128 |
| 4/17/2019 7:09 | 0.1917 | -0.0583 | 27.56   | -0.05   | 17.9583 | 47.675  | 1.7615 | 2.2401 |
| 4/17/2019 7:10 | 0.1333 | -0.1417 | 27.1742 | -0.2083 | 18.0035 | 44.0727 | 1.6782 | 2.2025 |
| 4/17/2019 7:11 | 0.2    | -0.3583 | 25.6775 | -0.0583 | 17.5378 | 51.6833 | 1.5345 | 2.1946 |
| 4/17/2019 7:12 | 0.2    | -0.5917 | 24.035  | -0.1    | 16.8738 | 43.7083 | 1.427  | 2.1898 |
| 4/17/2019 7:13 | 0.2    | -0.9583 | 23.3567 | -0.2833 | 16.6248 | 41.0583 | 1.3958 | 2.2226 |
| 4/17/2019 7:14 | 0.2    | 0.4167  | 21.7658 | 0.025   | 16.0123 | 45.6455 | 1.3482 | 2.2139 |
| 4/17/2019 7:15 | 0.2    | -0.6417 | 22.4242 | -0.0083 | 16.1929 | 45.825  | 1.3724 | 2.2012 |
| 4/17/2019 7:16 | 0.2    | -0.5333 | 21.77   | -0.1583 | 16.268  | 47.0273 | 1.3743 | 2.2292 |
| 4/17/2019 7:17 | 0.2    | 0.125   | 21.4817 | 0.1167  | 16.0124 | 47.0727 | 1.3583 | 2.2211 |
| 4/17/2019 7:18 | 0.275  | -0.325  | 20.4608 | -0.15   | 15.7056 | 47.1833 | 1.3352 | 2.1853 |
| 4/17/2019 7:19 | 0.3    | 0.2167  | 21.3425 | 0.525   | 16.1097 | 47.1909 | 1.4025 | 2.2094 |
| 4/17/2019 7:20 | 0.3    | -0.0417 | 20.8683 | -0.3583 | 15.8503 | 46.9917 | 1.3644 | 2.2032 |
| 4/17/2019 7:21 | 0.2583 | -0.4917 | 19.8517 | -0.1167 | 15.888  | 46.7182 | 1.3233 | 2.1788 |
| 4/17/2019 7:22 | 0.2083 | -0.6583 | 19.6967 | 0.1417  | 15.888  | 46.3818 | 1.3197 | 2.209  |
| 4/17/2019 7:23 | 0.2917 | 0.1333  | 18.97   | 0.1417  | 15.4833 | 46.075  | 1.2909 | 2.2368 |
| 4/17/2019 7:24 | 0.275  | -0.25   | 18.685  | -0.2167 | 14.9128 | 46.09   | 1.2988 | 2.2349 |
| 4/17/2019 7:25 | 0.2083 | 0.125   | 17.8133 | -0.2917 | 14.6731 | 45.7333 | 1.263  | 2.2239 |
| 4/17/2019 7:26 | 0.2083 | -0.3083 | 17.9067 | 0.4083  | 14.6149 | 44.8818 | 1.2935 | 2.2066 |
| 4/17/2019 7:27 | 0.2    | -0.8167 | 16.8708 | 0.0833  | 14.277  | 44.0546 | 1.2593 | 2.1878 |
| 4/17/2019 7:28 | 0.2    | -0.5083 | 17.9942 | -0.125  | 14.59   | 43.1909 | 1.2944 | 2.2446 |
| 4/17/2019 7:29 | 0.2    | -0.25   | 17.0392 | 0.2     | 14.2638 | 42.5727 | 1.2684 | 2.2472 |
| 4/17/2019 7:30 | 0.2    | -0.2667 | 15.9442 | -0.5833 | 13.7357 | 42.6636 | 1.2169 | 2.2493 |
| 4/17/2019 7:31 | 0.2833 | -0.0167 | 15.9517 | 0.1083  | 13.6913 | 42.3273 | 1.2195 | 2.233  |
| 4/17/2019 7:32 | 0.3    | -0.1333 | 15.6908 | 0       | 13.5437 | 41.6833 | 1.2086 | 2.1956 |
| 4/17/2019 7:33 | 0.3083 | -0.2583 | 15.7458 | 0.3583  | 13.5729 | 41.04   | 1.2125 | 2.2206 |

|                |        |         |         |         |         |         |        |        |
|----------------|--------|---------|---------|---------|---------|---------|--------|--------|
| 4/17/2019 7:34 | 0.3    | -0.2333 | 15.3258 | 0.0833  | 13.5298 | 40.75   | 1.2208 | 2.2064 |
| 4/17/2019 7:35 | 0.3    | -0.0417 | 15.5075 | -0.1083 | 13.4654 | 40.5333 | 1.2146 | 2.2175 |
| 4/17/2019 7:36 | 0.2583 | -0.2917 | 14.7808 | 0       | 13.1743 | 40.2    | 1.1813 | 2.2171 |
| 4/17/2019 7:37 | 0.1917 | -1.1083 | 14.5183 | -0.2917 | 13.1218 | 39.4    | 1.1903 | 2.2493 |
| 4/17/2019 7:38 | 0.1333 | -0.25   | 14.9217 | -0.9333 | 13.2263 | 39.7583 | 1.2017 | 2.2413 |
| 4/17/2019 7:39 | 0.1    | -0.325  | 14.645  | -0.3083 | 13.1861 | 40.13   | 1.1988 | 2.2121 |
| 4/17/2019 7:40 | 0.1    | -0.4167 | 14.1933 | -0.4583 | 12.9609 | 40.375  | 1.1807 | 2.2241 |
| 4/17/2019 7:41 | 0.1    | 0.2583  | 13.4367 | -0.6417 | 12.6481 | 40.35   | 1.1386 | 2.2141 |
| 4/17/2019 7:42 | 0.1    | 0       | 13.1567 | -0.2583 | 12.4895 | 40.1083 | 1.1316 | 2.1912 |
| 4/17/2019 7:43 | 0.1    | 0.225   | 13.3375 | -0.1833 | 12.5859 | 39.15   | 1.1565 | 2.2223 |
| 4/17/2019 7:44 | 0.1    | 0.0167  | 12.8775 | -0.675  | 12.2896 | 38.7333 | 1.1138 | 2.2234 |
| 4/17/2019 7:45 | 0.1    | -0.3917 | 12.4842 | -0.4333 | 12.1343 | 39.13   | 1.1077 | 2.1744 |
| 4/17/2019 7:46 | 0.075  | 0.2417  | 12.935  | -0.6083 | 12.2829 | 39.3583 | 1.1258 | 2.1828 |
| 4/17/2019 7:47 | 0      | -0.3083 | 13.6292 | -0.7417 | 12.4217 | 39.3091 | 1.1574 | 2.1973 |
| 4/17/2019 7:48 | 0      | -0.125  | 12.1583 | -0.1917 | 12.0603 | 38.775  | 1.1109 | 2.1858 |
| 4/17/2019 7:49 | 0      | -0.0417 | 11.9725 | -0.2    | 11.8891 | 38.56   | 1.075  | 2.184  |
| 4/17/2019 7:50 | 0      | -0.4917 | 12.2908 | -0.225  | 12.0168 | 38.5818 | 1.1063 | 2.22   |
| 4/17/2019 7:51 | 0      | -0.7417 | 12.6133 | -0.3417 | 11.9948 | 38.46   | 1.1079 | 2.2508 |
| 4/17/2019 7:52 | 0      | -0.55   | 11.9808 | -0.5167 | 11.7873 | 38.425  | 1.0771 | 2.2343 |
| 4/17/2019 7:53 | 0      | -0.3917 | 11.3025 | -0.3583 | 11.7333 | 38.6091 | 1.0907 | 2.2348 |
| 4/17/2019 7:54 | 0      | -0.2833 | 11.9042 | -0.2083 | 11.7408 | 38.35   | 1.079  | 2.2543 |
| 4/17/2019 7:55 | 0.05   | -0.6917 | 10.945  | -0.525  | 11.4294 | 38.17   | 1.0441 | 2.2353 |
| 4/17/2019 7:56 | 0.1    | -1.0417 | 11.1492 | -0.4    | 11.4206 | 38.6333 | 1.0642 | 2.2306 |
| 4/17/2019 7:57 | 0.1    | -1.0417 | 11.0158 | -0.525  | 11.3493 | 38.7818 | 1.0486 | 2.2278 |
| 4/17/2019 7:58 | 0.1    | -0.7583 | 10.9042 | -0.4417 | 11.2982 | 38.4182 | 1.0462 | 2.2051 |
| 4/17/2019 7:59 | 0.1    | -0.1833 | 10.7242 | -0.85   | 11.308  | 37.83   | 1.0303 | 2.1994 |
| 4/17/2019 8:00 | 0.1    | -0.625  | 11.1692 | -0.125  | 11.2942 | 37.2909 | 1.04   | 2.238  |
| 4/17/2019 8:01 | 0.1167 | 0.1333  | 10.72   | -0.1667 | 11.1613 | 37.55   | 1.0383 | 2.2129 |
| 4/17/2019 8:02 | 0.125  | -0.8333 | 10.3263 | -0.6917 | 10.9313 | 37.3909 | 1.0081 | 2.1867 |
| 4/17/2019 8:03 | 0.1    | -0.1167 | 10.0204 | -0.6667 | 10.9883 | 37.04   | 0.9977 | 2.2069 |
| 4/17/2019 8:04 | 0.1    | -0.0583 | 10.0448 | -0.3833 | 10.9638 | 36.92   | 1.0143 | 2.2285 |
| 4/17/2019 8:05 | 0.1    | 0.0667  | 10.4569 | 0.0583  | 11.0163 | 36.4273 | 1.034  | 2.2647 |
| 4/17/2019 8:06 | 0.1    | -0.3    | 10.0346 | 0.0333  | 10.8663 | 35.475  | 0.9992 | 2.2435 |
| 4/17/2019 8:07 | 0.1    | -0.3917 | 9.5583  | -0.925  | 10.7478 | 35.075  | 0.9763 | 2.2057 |
| 4/17/2019 8:08 | 0.1    | -0.3583 | 9.6263  | -0.4583 | 10.6499 | 34.8    | 0.9834 | 2.2242 |
| 4/17/2019 8:09 | 0.1    | -0.3667 | 9.7648  | -0.725  | 10.7409 | 34.2    | 1.0007 | 2.2426 |
| 4/17/2019 8:10 | 0.1    | -1.175  | 10.018  | -0.7    | 10.7086 | 33.575  | 0.9762 | 2.2527 |
| 4/17/2019 8:11 | 0.1    | -0.0083 | 9.4824  | -0.7    | 10.5967 | 33.6917 | 0.9393 | 2.2055 |
| 4/17/2019 8:12 | 0.1    | -0.6333 | 9.2255  | -0.5333 | 10.4697 | 34.06   | 0.9552 | 2.1839 |
| 4/17/2019 8:13 | 0.1    | -0.175  | 9.01    | -0.6833 | 10.5065 | 33.4167 | 0.9341 | 2.1863 |
| 4/17/2019 8:14 | 0.1    | 0.0583  | 8.8021  | -0.45   | 10.4214 | 32.8417 | 0.9497 | 2.1961 |
| 4/17/2019 8:15 | 0.1    | -0.3083 | 8.9828  | -0.3833 | 10.493  | 32.7    | 0.9366 | 2.1924 |
| 4/17/2019 8:16 | 0.1    | -0.0667 | 8.6903  | -0.5    | 10.3533 | 32.4667 | 0.9299 | 2.1838 |
| 4/17/2019 8:17 | 0.1    | -0.1083 | 8.4718  | -0.8417 | 10.4131 | 32.0546 | 0.928  | 2.2165 |
| 4/17/2019 8:18 | 0.1    | -0.15   | 8.7912  | -0.3667 | 10.3538 | 31.85   | 0.9346 | 2.2453 |
| 4/17/2019 8:19 | 0.1    | 0.4583  | 8.242   | -0.2667 | 10.2202 | 31.7182 | 0.9159 | 2.2176 |
| 4/17/2019 8:20 | 0.1    | -0.4583 | 7.4074  | -0.375  | 10.2916 | 31.4167 | 0.8966 | 2.1811 |

|                |        |         |        |         |         |         |        |        |
|----------------|--------|---------|--------|---------|---------|---------|--------|--------|
| 4/17/2019 8:21 | 0.1    | -0.6417 | 7.9803 | -0.7333 | 10.1293 | 31.3546 | 0.8879 | 2.1759 |
| 4/17/2019 8:22 | 0.1    | -0.7333 | 7.4218 | -0.15   | 10.1733 | 31.2583 | 0.8886 | 2.1828 |
| 4/17/2019 8:23 | 0.15   | 0.0583  | 6.8734 | -0.2667 | 10.174  | 30.86   | 0.824  | 2.1494 |
| 4/17/2019 8:24 | 0.225  | -0.625  | 7.3247 | 0.3833  | 10.7288 | 30.1909 | 0.7985 | 2.1392 |
| 4/17/2019 8:25 | 0.4417 | 0.1     | 6.0839 | 0.4167  | 14.1566 | 29.2182 | 0.6743 | 2.0251 |
| 4/17/2019 8:26 | 0.55   | 0.3667  | 5.5891 | 0.05    | 14.34   | 28.7417 | 0.6429 | 1.9538 |
| 4/17/2019 8:27 | 0.7917 | 0.5833  | 4.5972 | 0.575   | 15.4318 | 27.7364 | 0.5814 | 1.8892 |
| 4/17/2019 8:28 | 0.95   | 1.0333  | 5.1363 | 0.4667  | 16.2148 | 26.0917 | 0.5489 | 1.8304 |
| 4/17/2019 8:29 | 1.1583 | 0.6417  | 4.841  | 0.7167  | 16.3568 | 24.47   | 0.531  | 1.8293 |
| 4/17/2019 8:30 | 1.2    | 1.025   | 4.622  | 0.6     | 16.7018 | 23.8083 | 0.5246 | 1.8037 |
| 4/17/2019 8:31 | 1.225  | 0.8     | 4.7487 | 0.9083  | 17.0158 | 22.9917 | 0.4985 | 1.7683 |
| 4/17/2019 8:32 | 1.325  | 1.3833  | 4.6177 | 1.6833  | 17.3833 | 21.875  | 0.4496 | 1.748  |
| 4/17/2019 8:33 | 1.4583 | 1.2917  | 4.4438 | 1.4333  | 17.8317 | 20.8833 | 0.4439 | 1.7441 |
| 4/17/2019 8:34 | 1.6917 | 1.2333  | 4.4657 | 1.8083  | 18.3129 | 19.8091 | 0.4128 | 1.7277 |
| 4/17/2019 8:35 | 1.8    | 1.15    | 4.1612 | 1.2     | 18.3665 | 18.7636 | 0.3883 | 1.6943 |
| 4/17/2019 8:36 | 1.8833 | 2.2083  | 3.901  | 1.5833  | 18.8938 | 18.5083 | 0.3864 | 1.6943 |
| 4/17/2019 8:37 | 1.9    | 1.9667  | 4.1653 | 1.5083  | 19.3507 | 18.9417 | 0.3649 | 1.6863 |
| 4/17/2019 8:38 | 2.0333 | 1.9083  | 4.0663 | 1.475   | 19.8486 | 19.03   | 0.3539 | 1.6578 |
| 4/17/2019 8:39 | 2.0167 | 1.075   | 4.6702 | 2.2167  | 19.9568 | 18.825  | 0.3589 | 1.6414 |
| 4/17/2019 8:40 | 2.0917 | 2.2917  | 3.8608 | 1.1417  | 20.518  | 19.1083 | 0.3293 | 1.6452 |
| 4/17/2019 8:41 | 2.0083 | 2.3     | 3.538  | 1.6667  | 21.1328 | 19.55   | 0.3255 | 1.6378 |
| 4/17/2019 8:42 | 2      | 1.925   | 3.4442 | 1.5417  | 21.4959 | 19.42   | 0.3221 | 1.618  |
| 4/17/2019 8:43 | 1.9333 | 2.0167  | 3.3365 | 1.8083  | 21.6103 | 19.7182 | 0.3066 | 1.6158 |
| 4/17/2019 8:44 | 1.9    | 1.4083  | 3.458  | 1.7833  | 21.7433 | 20.0182 | 0.3148 | 1.6405 |
| 4/17/2019 8:45 | 1.9167 | 1.325   | 3.2528 | 1.5083  | 21.812  | 19.8636 | 0.3079 | 1.6456 |
| 4/17/2019 8:46 | 1.9917 | 2.1167  | 3.3272 | 1.7333  | 22.0028 | 20.0083 | 0.2939 | 1.6223 |
| 4/17/2019 8:47 | 2      | 1.625   | 3.3318 | 1.6417  | 21.9083 | 20.23   | 0.3104 | 1.6208 |
| 4/17/2019 8:48 | 2.0417 | 1.5167  | 3.579  | 1.8833  | 21.8522 | 20.09   | 0.289  | 1.6009 |
| 4/17/2019 8:49 | 2.1    | 1.8     | 3.5585 | 2.0167  | 21.5936 | 19.7546 | 0.2893 | 1.5908 |
| 4/17/2019 8:50 | 2.1417 | 2.3667  | 3.6678 | 1.875   | 21.3193 | 19.4546 | 0.2872 | 1.5841 |
| 4/17/2019 8:51 | 2.1917 | 2.0083  | 3.4503 | 2.15    | 21.2048 | 19.525  | 0.2701 | 1.5531 |
| 4/17/2019 8:52 | 2.1417 | 2.0167  | 3.6847 | 1.7083  | 20.8035 | 19.4091 | 0.2832 | 1.5723 |
| 4/17/2019 8:53 | 2.2167 | 2.2     | 3.64   | 1.625   | 20.4574 | 18.7636 | 0.2667 | 1.5403 |
| 4/17/2019 8:54 | 2.3    | 1.6     | 3.6757 | 2.4583  | 20.2287 | 18.475  | 0.2588 | 1.5178 |
| 4/17/2019 8:55 | 2.45   | 1.8667  | 3.7232 | 2.0167  | 20.0615 | 18.1909 | 0.2625 | 1.5134 |
| 4/17/2019 8:56 | 2.575  | 2.4167  | 4.22   | 2.5667  | 19.897  | 17.9    | 0.244  | 1.5045 |
| 4/17/2019 8:57 | 2.6667 | 2.025   | 4.23   | 2.4167  | 19.4673 | 17.8818 | 0.2491 | 1.5288 |
| 4/17/2019 8:58 | 2.8    | 2.55    | 4.0763 | 2.275   | 19.1265 | 17.6818 | 0.2478 | 1.5115 |
| 4/17/2019 8:59 | 2.8417 | 2.4167  | 4.0725 | 2.1417  | 18.7908 | 17.4818 | 0.2303 | 1.4993 |
| 4/17/2019 9:00 | 2.8    | 1.8583  | 4.042  | 2.7667  | 18.6328 | 17.2417 | 0.2482 | 1.5587 |
| 4/17/2019 9:01 | 2.7    | 2.4167  | 3.7985 | 2.1417  | 18.8229 | 16.9182 | 0.2461 | 1.5685 |
| 4/17/2019 9:02 | 2.5    | 1.7333  | 3.8438 | 1.7083  | 19.0264 | 16.8417 | 0.2431 | 1.5556 |
| 4/17/2019 9:03 | 2.325  | 2.2     | 3.4713 | 1.625   | 18.8085 | 16.36   | 0.2581 | 1.562  |
| 4/17/2019 9:04 | 2.1417 | 1.2167  | 3.4748 | 0.8917  | 18.5969 | 15.9667 | 0.2443 | 1.5793 |
| 4/17/2019 9:05 | 1.9833 | 1.7583  | 3.287  | 1.7833  | 18.5947 | 16.2667 | 0.2535 | 1.5681 |
| 4/17/2019 9:06 | 1.825  | 1.35    | 3.3153 | 1       | 18.4873 | 16.6667 | 0.2594 | 1.5867 |
| 4/17/2019 9:07 | 1.7917 | 0.825   | 3.1977 | 1.2667  | 18.3743 | 16.8091 | 0.2477 | 1.6048 |

|                |         |         |         |         |         |          |        |        |
|----------------|---------|---------|---------|---------|---------|----------|--------|--------|
| 4/17/2019 9:08 | 1.7     | 1.4583  | 3.1312  | 0.8667  | 18.3028 | 17.2     | 0.2647 | 1.6037 |
| 4/17/2019 9:09 | 1.6333  | 1.4667  | 3.217   | 0.4     | 18.2227 | 17.95    | 0.2531 | 1.6124 |
| 4/17/2019 9:10 | 1.5     | 0.9917  | 3.2415  | 0.6917  | 17.9633 | 17.8818  | 0.2574 | 1.6285 |
| 4/17/2019 9:11 | 1.4     | 1.5167  | 2.9318  | 0.3167  | 17.6482 | 17.17    | 0.2622 | 1.6714 |
| 4/17/2019 9:12 | 1.3     | 0.6917  | 2.9752  | 0.4     | 17.6053 | 16.3167  | 0.2606 | 1.6688 |
| 4/17/2019 9:13 | 1.2545  | 0.5833  | 2.871   | 0.8917  | 17.6341 | 15.5667  | 0.2626 | 1.6965 |
| 4/17/2019 9:14 | 1.2     | 1.175   | 3.0868  | 0.4     | 17.5455 | 14.5583  | 0.2666 | 1.6942 |
| 4/17/2019 9:15 | 1.125   | 0.7833  | 2.9722  | 0.0333  | 17.4542 | 14.1     | 0.2526 | 1.692  |
| 4/17/2019 9:16 | 1.0417  | 0.275   | 4.0725  | 0.575   | 20.1175 | 14.175   | 0.3195 | 1.7291 |
| 4/17/2019 9:17 | 0.8917  | 1       | 25.44   | 2.2417  | 34.7918 | 45.57    | 0.8513 | 1.8553 |
| 4/17/2019 9:18 | 0.7167  | -0.0333 | 20.2733 | 0.9667  | 33.5911 | 56.0917  | 0.7687 | 1.9113 |
| 4/17/2019 9:19 | 0.4833  | 0.15    | 28.4767 | 1.7333  | 49.2285 | 61.3818  | 1.5541 | 1.9828 |
| 4/17/2019 9:20 | 0.2917  | 0       | 52.9333 | 1.8167  | 54.4937 | 76.925   | 2.434  | 2.2053 |
| 4/17/2019 9:21 | 0.0833  | -0.4417 | 91.6717 | 3.8917  | 57.376  | 109.6417 | 5.3535 | 2.588  |
| 4/17/2019 9:22 | -0.025  | -0.4833 | 77.75   | 2.2583  | 59.0193 | 112      | 5.7778 | 2.6795 |
| 4/17/2019 9:23 | -0.0833 | -0.8083 | 64.0817 | 1.3667  | 58.8373 | 116.5727 | 5.4355 | 2.6653 |
| 4/17/2019 9:24 | -0.0167 | -0.6583 | 57.2683 | 1       | 58.706  | 119.0167 | 5.5    | 2.4768 |
| 4/17/2019 9:25 | 0       | -0.4    | 51.6467 | 0.6333  | 55.1194 | 111.8333 | 4.3455 | 2.3534 |
| 4/17/2019 9:26 | 0       | -0.2667 | 51.5517 | -0.25   | 52.8059 | 115.875  | 5.052  | 2.3331 |
| 4/17/2019 9:27 | 0       | -0.5583 | 50.6317 | 0.0333  | 53.442  | 102.3636 | 5.1875 | 2.3406 |
| 4/17/2019 9:28 | 0       | -0.4917 | 48.7333 | 0.0417  | 52.8147 | 100.8167 | 3.7662 | 2.3108 |
| 4/17/2019 9:29 | 0.0167  | -0.9083 | 48.2383 | 0.6917  | 52.5917 | 97.2364  | 4.1358 | 2.3156 |
| 4/17/2019 9:30 | 0.0917  | -0.75   | 47.7317 | 0.0417  | 52.1529 | 101.8667 | 4.115  | 2.324  |
| 4/17/2019 9:31 | 0.0917  | -0.1    | 44.5717 | 0.5917  | 50.3105 | 104.0083 | 3.7648 | 2.2952 |
| 4/17/2019 9:32 | 0.1     | -0.7333 | 44.8717 | 0.6667  | 50.1548 | 100.6182 | 3.8037 | 2.2989 |
| 4/17/2019 9:33 | 0.1     | -1.0583 | 41.7517 | 0.4583  | 47.7456 | 98.42    | 3.4042 | 2.2733 |
| 4/17/2019 9:34 | 0.1667  | 0.1167  | 41.7717 | 0.5333  | 47.9272 | 98.6909  | 3.3835 | 2.2547 |
| 4/17/2019 9:35 | 0.2     | 0.275   | 42.9733 | 0.8917  | 49.0726 | 99.1583  | 3.7188 | 2.2717 |
| 4/17/2019 9:36 | 0.2     | -0.4083 | 42.695  | 0.15    | 49.1096 | 99.5182  | 3.4415 | 2.295  |
| 4/17/2019 9:37 | 0.2     | -0.7083 | 40.265  | 0.0583  | 47.0065 | 98.8917  | 3.2658 | 2.2952 |
| 4/17/2019 9:38 | 0.275   | -0.3333 | 38.765  | 0.1     | 45.8708 | 98.2417  | 3.2632 | 2.2866 |
| 4/17/2019 9:39 | 0.3083  | -0.7333 | 38.5    | 0.7917  | 45.8989 | 97.7333  | 3.335  | 2.3089 |
| 4/17/2019 9:40 | 0.3667  | -1      | 38.3283 | -0.0083 | 45.6353 | 97.2455  | 3.1947 | 2.3135 |
| 4/17/2019 9:41 | 0.325   | -0.9167 | 35.8417 | -0.0333 | 43.8443 | 96.4     | 3.0018 | 2.2851 |
| 4/17/2019 9:42 | 0.3     | -0.55   | 37.3383 | 0.775   | 44.6816 | 95.6455  | 3.0463 | 2.3003 |
| 4/17/2019 9:43 | 0.3     | -0.4917 | 35.7067 | 0.5667  | 43.8696 | 95.0364  | 2.9838 | 2.2759 |
| 4/17/2019 9:44 | 0.3     | -0.2667 | 34.175  | 0.3167  | 42.322  | 94.0091  | 2.8632 | 2.2473 |
| 4/17/2019 9:45 | 0.3     | 0.1167  | 33.465  | 0.325   | 41.7789 | 92.8     | 2.8773 | 2.2771 |
| 4/17/2019 9:46 | 0.3     | -0.1917 | 32.4767 | 0.0917  | 40.563  | 90.9182  | 2.7953 | 2.3091 |
| 4/17/2019 9:47 | 0.3     | -0.6167 | 32.605  | 0.325   | 40.5501 | 89.47    | 2.8033 | 2.2998 |
| 4/17/2019 9:48 | 0.3     | -0.25   | 31.865  | 0.0333  | 39.928  | 87.5273  | 2.792  | 2.2658 |
| 4/17/2019 9:49 | 0.3     | 0.2083  | 34.465  | 0.3333  | 42.1529 | 87.25    | 2.9263 | 2.3024 |
| 4/17/2019 9:50 | 0.3     | -0.525  | 32.945  | -0.5083 | 40.6003 | 86.8818  | 2.8567 | 2.3046 |
| 4/17/2019 9:51 | 0.3     | 0.05    | 29.8317 | -0.025  | 37.4736 | 86.1455  | 2.6688 | 2.2302 |
| 4/17/2019 9:52 | 0.3     | -0.1833 | 30.08   | 0.225   | 38.0726 | 85.175   | 2.7227 | 2.2475 |
| 4/17/2019 9:53 | 0.2583  | -0.2417 | 28.73   | 0.1833  | 37.1508 | 84.3727  | 2.6932 | 2.2469 |
| 4/17/2019 9:54 | 0.2     | 0.1917  | 30.03   | 0.7833  | 37.9575 | 83.8083  | 2.7602 | 2.2721 |

|                 |         |         |         |         |         |         |        |        |
|-----------------|---------|---------|---------|---------|---------|---------|--------|--------|
| 4/17/2019 9:55  | 0.2     | -0.0417 | 29.2717 | 0.1167  | 36.4409 | 82.9818 | 2.67   | 2.2858 |
| 4/17/2019 9:56  | 0.2     | -0.1    | 27.9533 | -0.0083 | 35.8798 | 82.0833 | 2.6495 | 2.2903 |
| 4/17/2019 9:57  | 0.2     | -0.3167 | 28.6483 | 0.125   | 36.8787 | 81.5833 | 2.7313 | 2.2917 |
| 4/17/2019 9:58  | 0.1167  | -0.4333 | 28.3217 | -0.2917 | 36.1486 | 81.2636 | 2.6657 | 2.2753 |
| 4/17/2019 9:59  | 0.1     | -0.6417 | 27.0333 | -0.3833 | 34.8578 | 80.875  | 2.6058 | 2.2403 |
| 4/17/2019 10:00 | 0.1     | -0.3667 | 26.2642 | -0.45   | 34.1899 | 80.4    | 2.5605 | 2.2818 |
| 4/17/2019 10:01 | 0.1     | -0.65   | 26.2567 | 0.2917  | 34.1258 | 79.7455 | 2.5995 | 2.2638 |
| 4/17/2019 10:02 | 0       | -0.4333 | 26.1008 | 0.1917  | 33.9261 | 78.88   | 2.5788 | 2.2763 |
| 4/17/2019 10:03 | 0       | -0.4417 | 26.1592 | 0.2667  | 33.732  | 78.5167 | 2.5727 | 2.2862 |
| 4/17/2019 10:04 | 0       | -0.4417 | 25.1542 | 0.2833  | 33.1503 | 78.0818 | 2.5567 | 2.2804 |
| 4/17/2019 10:05 | 0.0667  | -0.1833 | 26.3183 | 0.4917  | 33.428  | 77.9273 | 2.5787 | 2.315  |
| 4/17/2019 10:06 | 0.0917  | -0.5    | 26.2167 | -0.0083 | 33.459  | 77.675  | 2.6018 | 2.3245 |
| 4/17/2019 10:07 | 0.0167  | -1.0917 | 24.5525 | 0.0667  | 32.3823 | 77.2417 | 2.5375 | 2.2899 |
| 4/17/2019 10:08 | 0       | 0.2083  | 25.085  | 0.225   | 32.2335 | 76.8833 | 2.5235 | 2.3059 |
| 4/17/2019 10:09 | 0       | -0.425  | 24.0958 | -0.8083 | 31.1533 | 76.325  | 2.4743 | 2.2835 |
| 4/17/2019 10:10 | 0       | 0.25    | 22.9142 | -0.1833 | 30.4713 | 75.5182 | 2.442  | 2.2562 |
| 4/17/2019 10:11 | 0.05    | -0.775  | 23.8283 | -0.2083 | 31.2895 | 74.95   | 2.5027 | 2.2607 |
| 4/17/2019 10:12 | 0.1     | 0.15    | 23.0675 | 0.3167  | 30.2909 | 74.55   | 2.4258 | 2.29   |
| 4/17/2019 10:13 | 0.1     | -0.0917 | 22.6025 | 0.0083  | 29.9579 | 74.0727 | 2.4158 | 2.2985 |
| 4/17/2019 10:14 | 0.1     | -0.3083 | 22.4425 | 0.05    | 29.5588 | 73.5083 | 2.4148 | 2.2698 |
| 4/17/2019 10:15 | 0.1     | -0.1833 | 23.2517 | 0.375   | 29.9518 | 72.9818 | 2.4608 | 2.2946 |
| 4/17/2019 10:16 | 0.1417  | -0.25   | 23.1767 | -0.375  | 30.1018 | 72.6833 | 2.4687 | 2.3298 |
| 4/17/2019 10:17 | 0.1667  | -0.3083 | 22.4533 | -0.3333 | 29.3583 | 72.275  | 2.4199 | 2.3286 |
| 4/17/2019 10:18 | 0.1583  | -0.0667 | 21.5567 | 0.075   | 28.8576 | 71.6583 | 2.3775 | 2.3402 |
| 4/17/2019 10:19 | 0.2     | 0.0333  | 21.465  | -0.2417 | 28.3872 | 71.1364 | 2.3649 | 2.3288 |
| 4/17/2019 10:20 | 0.2     | -0.0833 | 20.8217 | -0.3    | 27.8611 | 70.675  | 2.348  | 2.3201 |
| 4/17/2019 10:21 | 0.1583  | 0.0917  | 21.3358 | -0.0833 | 28.3149 | 70.4455 | 2.3727 | 2.3458 |
| 4/17/2019 10:22 | 0.1     | 0.15    | 22.1458 | -0.15   | 28.1793 | 70.3167 | 2.3834 | 2.332  |
| 4/17/2019 10:23 | 0.1     | -0.6083 | 21.1858 | -0.2833 | 27.9924 | 70.0909 | 2.3646 | 2.3285 |
| 4/17/2019 10:24 | 0.1     | -0.6083 | 20.3642 | -0.0083 | 27.4035 | 69.825  | 2.3164 | 2.3077 |
| 4/17/2019 10:25 | 0.1     | -0.65   | 20.1842 | -0.2917 | 27.307  | 69.4909 | 2.3023 | 2.2959 |
| 4/17/2019 10:26 | 0.0333  | -0.625  | 20.1275 | -0.1333 | 27.1828 | 69.2091 | 2.2699 | 2.3135 |
| 4/17/2019 10:27 | 0.025   | -0.3917 | 19.7875 | -0.5667 | 26.2318 | 68.8417 | 2.2649 | 2.3382 |
| 4/17/2019 10:28 | 0.0167  | -0.1417 | 19.1633 | -0.8417 | 25.643  | 68.15   | 2.2241 | 2.3193 |
| 4/17/2019 10:29 | 0       | -0.6    | 19.28   | -0.1667 | 25.5725 | 67.5    | 2.2241 | 2.3083 |
| 4/17/2019 10:30 | -0.025  | -0.025  | 19.7008 | 0.375   | 25.8469 | 67.0455 | 2.269  | 2.3054 |
| 4/17/2019 10:31 | -0.1    | -0.2833 | 19.145  | 0.0833  | 25.3181 | 66.7182 | 2.2351 | 2.3147 |
| 4/17/2019 10:32 | -0.0667 | -0.4    | 19.3142 | -0.4083 | 25.6199 | 66.5    | 2.267  | 2.319  |
| 4/17/2019 10:33 | -0.1    | -0.3    | 19.01   | -0.0667 | 25.2753 | 66.1917 | 2.2453 | 2.3456 |
| 4/17/2019 10:34 | -0.0417 | -0.5667 | 18.78   | -0.2417 | 24.8957 | 65.725  | 2.1975 | 2.3562 |
| 4/17/2019 10:35 | -0.0583 | -0.5917 | 18.2092 | 0.2417  | 24.2205 | 65.0545 | 2.1829 | 2.3273 |
| 4/17/2019 10:36 | -0.1    | -0.6417 | 18.9433 | 0.0167  | 24.6053 | 64.5364 | 2.2159 | 2.3713 |
| 4/17/2019 10:37 | -0.1    | -0.475  | 17.9133 | -0.4083 | 23.7321 | 64.1417 | 2.1343 | 2.3588 |
| 4/17/2019 10:38 | -0.0417 | -0.1667 | 15.6542 | -0.5417 | 21.9354 | 63.4    | 1.9616 | 2.2593 |
| 4/17/2019 10:39 | 0.025   | -0.0083 | 16.0075 | 0.075   | 21.698  | 62.35   | 1.8689 | 2.2123 |
| 4/17/2019 10:40 | 0.275   | 0.7     | 13.8692 | 0.3667  | 20.6827 | 60.9727 | 1.6244 | 2.1076 |
| 4/17/2019 10:41 | 0.5167  | 1.175   | 12.795  | 0.5917  | 20.3086 | 59.1083 | 1.4973 | 2.0487 |

|                 |         |         |         |         |         |         |        |        |
|-----------------|---------|---------|---------|---------|---------|---------|--------|--------|
| 4/17/2019 10:42 | 0.7833  | 1.1417  | 11.6208 | 1.1667  | 19.7957 | 56.8818 | 1.3663 | 1.9919 |
| 4/17/2019 10:43 | 0.8917  | 0.6583  | 10.3392 | 0.9083  | 18.8334 | 54.275  | 1.2568 | 1.9428 |
| 4/17/2019 10:44 | 1.0667  | 1.1917  | 9.6973  | 1.675   | 18.533  | 51.2818 | 1.1171 | 1.9176 |
| 4/17/2019 10:45 | 1.275   | 1.9417  | 8.7536  | 1.425   | 17.9481 | 48.0833 | 1.0395 | 1.8803 |
| 4/17/2019 10:46 | 1.4833  | 1.2333  | 8.5752  | 1.85    | 18.1573 | 44.5182 | 0.9805 | 1.855  |
| 4/17/2019 10:47 | 1.5917  | 1.7583  | 8.1673  | 1.5917  | 18.1754 | 40.9583 | 0.899  | 1.8182 |
| 4/17/2019 10:48 | 1.75    | 2.425   | 7.468   | 1.6167  | 17.5542 | 37.1364 | 0.8435 | 1.7778 |
| 4/17/2019 10:49 | 2.0167  | 3.0667  | 7.5673  | 2.7583  | 16.8065 | 33.1667 | 0.7492 | 1.7556 |
| 4/17/2019 10:50 | 2.2667  | 2.625   | 7.2653  | 3.2     | 16.6271 | 29.1556 | 0.7072 | 1.7248 |
| 4/17/2019 10:51 | 2.4583  | 2.475   | 6.9849  | 2.5667  | 16.2649 | 25.8583 | 0.6931 | 1.7403 |
| 4/17/2019 10:52 | 2.6667  | 3.5083  | 7.2459  | 3.4917  | 15.7361 | 22.6909 | 0.6236 | 1.7392 |
| 4/17/2019 10:53 | 2.9833  | 3.45    | 7.2803  | 3.475   | 15.1986 | 19.8667 | 0.5876 | 1.7283 |
| 4/17/2019 10:54 | 3.275   | 3.7917  | 7.3459  | 3.2667  | 15.0588 | 17.2167 | 0.584  | 1.7207 |
| 4/17/2019 10:55 | 3.3083  | 3.2     | 7.1545  | 2.925   | 15.0307 | 15.1727 | 0.5702 | 1.7267 |
| 4/17/2019 10:56 | 3.325   | 3.9     | 7.6978  | 3.2583  | 14.6196 | 13.3083 | 0.5566 | 1.7076 |
| 4/17/2019 10:57 | 3.4667  | 4.1167  | 6.8629  | 3.975   | 14.2046 | 11.58   | 0.5195 | 1.6734 |
| 4/17/2019 10:58 | 3.85    | 5.0333  | 7.5813  | 4.2417  | 13.4365 | 10.4167 | 0.4803 | 1.6615 |
| 4/17/2019 10:59 | 4.3417  | 6.2333  | 7.7613  | 5.5083  | 12.7887 | 9.21    | 0.4468 | 1.643  |
| 4/17/2019 11:00 | 4.75    | 5.775   | 7.8481  | 5.4     | 12.3148 | 8.2     | 0.4148 | 1.6718 |
| 4/17/2019 11:01 | 4.9917  | 5.675   | 7.8464  | 5.1833  | 12.0475 | 7.3636  | 0.4191 | 1.6498 |
| 4/17/2019 11:02 | 5.0083  | 5.2083  | 7.962   | 5.725   | 11.8445 | 6.7     | 0.4021 | 1.6605 |
| 4/17/2019 11:03 | 5.2583  | 6.2583  | 8.2402  | 6.2667  | 11.2888 | 6.0333  | 0.3809 | 1.6642 |
| 4/17/2019 11:04 | 5.5167  | 6.9417  | 8.5531  | 6.6     | 11.0416 | 5.5364  | 0.3676 | 1.626  |
| 4/17/2019 11:05 | 5.8     | 6.1167  | 8.4038  | 5.8417  | 10.6875 | 5.1083  | 0.343  | 1.619  |
| 4/17/2019 11:06 | 5.9333  | 6.225   | 8.8434  | 6.9417  | 10.3854 | 4.6909  | 0.3594 | 1.6063 |
| 4/17/2019 11:07 | 6.1917  | 6.9333  | 9.0024  | 7.2     | 10.0673 | 4.3417  | 0.334  | 1.5926 |
| 4/17/2019 11:08 | 6.3917  | 7.2     | 9.2101  | 7.7083  | 9.8515  | 4.0091  | 0.319  | 1.6019 |
| 4/17/2019 11:09 | 6.8167  | 7.8833  | 9.6923  | 7.2917  | 9.3683  | 3.7583  | 0.3096 | 1.5855 |
| 4/17/2019 11:10 | 7.225   | 8.6583  | 9.9874  | 8.4167  | 9.0901  | 3.45    | 0.2887 | 1.6172 |
| 4/17/2019 11:11 | 7.625   | 7.8333  | 9.8342  | 8.225   | 8.9463  | 3.2583  | 0.2977 | 1.6158 |
| 4/17/2019 11:12 | 7.8     | 8.7833  | 9.9816  | 8.25    | 8.6098  | 3.1182  | 0.2878 | 1.5689 |
| 4/17/2019 11:13 | 7.9     | 9.375   | 10.3907 | 8.7917  | 8.3688  | 2.9667  | 0.2714 | 1.546  |
| 4/17/2019 11:14 | 7.9083  | 8.4167  | 10.0143 | 8.0583  | 8.3274  | 2.8182  | 0.2865 | 1.5703 |
| 4/17/2019 11:15 | 8.1083  | 8.875   | 10.7842 | 8.8417  | 8.1367  | 2.7083  | 0.2539 | 1.5795 |
| 4/17/2019 11:16 | 8.2333  | 9.35    | 10.7717 | 9.025   | 7.871   | 2.6     | 0.2633 | 1.5733 |
| 4/17/2019 11:17 | 8.55    | 9.3083  | 11.025  | 8.85    | 7.736   | 2.5455  | 0.2495 | 1.57   |
| 4/17/2019 11:18 | 8.6167  | 9.05    | 10.8    | 8.7083  | 7.6102  | 2.4583  | 0.2487 | 1.5544 |
| 4/17/2019 11:19 | 8.8     | 9.475   | 11.7058 | 9.6917  | 7.3408  | 2.3545  | 0.2555 | 1.5553 |
| 4/17/2019 11:20 | 8.9583  | 9.2333  | 11.205  | 9.8667  | 7.1591  | 2.3     | 0.2329 | 1.5783 |
| 4/17/2019 11:21 | 9.2083  | 9.25    | 11.505  | 10.5    | 7.0691  | 2.2545  | 0.246  | 1.5603 |
| 4/17/2019 11:22 | 9.375   | 10.2417 | 12.6458 | 10.675  | 6.8587  | 2.2     | 0.2413 | 1.5405 |
| 4/17/2019 11:23 | 9.5     | 10.4667 | 11.7833 | 10.5167 | 6.6646  | 2.1     | 0.2298 | 1.5843 |
| 4/17/2019 11:24 | 9.6167  | 10.625  | 12.1608 | 10.7667 | 6.5405  | 2.0727  | 0.2439 | 1.5907 |
| 4/17/2019 11:25 | 9.7167  | 9.6083  | 11.8483 | 10.3    | 6.4243  | 2       | 0.23   | 1.5883 |
| 4/17/2019 11:26 | 9.85    | 9.4167  | 12.135  | 10.7833 | 6.436   | 1.9545  | 0.235  | 1.5448 |
| 4/17/2019 11:27 | 9.9583  | 10.4417 | 12.4392 | 10.8167 | 6.4001  | 1.9     | 0.2295 | 1.5581 |
| 4/17/2019 11:28 | 10.0667 | 10.4417 | 12.1075 | 10.1333 | 5.9253  | 1.86    | 0.2259 | 1.5665 |

|                 |         |         |         |         |        |        |        |        |
|-----------------|---------|---------|---------|---------|--------|--------|--------|--------|
| 4/17/2019 11:29 | 10.3083 | 11.7    | 12.7417 | 11.65   | 5.6831 | 1.8    | 0.2254 | 1.5699 |
| 4/17/2019 11:30 | 10.4    | 10.65   | 12.5517 | 11.0083 | 5.631  | 1.7273 | 0.2184 | 1.5655 |
| 4/17/2019 11:31 | 10.5583 | 10.5583 | 12.7333 | 10.675  | 5.5543 | 1.7182 | 0.2231 | 1.5548 |
| 4/17/2019 11:32 | 10.5083 | 10.8083 | 13.0983 | 11.1917 | 5.5024 | 1.7    | 0.2205 | 1.5584 |
| 4/17/2019 11:33 | 10.5333 | 11.025  | 12.785  | 11.0333 | 5.3817 | 1.7    | 0.2145 | 1.534  |
| 4/17/2019 11:34 | 10.6    | 11.1333 | 13.2167 | 11.4917 | 5.336  | 1.7    | 0.2202 | 1.5076 |
| 4/17/2019 11:35 | 10.75   | 11.1667 | 13.185  | 11.1833 | 5.2208 | 1.7    | 0.1996 | 1.5203 |
| 4/17/2019 11:36 | 10.8    | 11.5417 | 13.3433 | 11.6583 | 5.2513 | 1.7    | 0.213  | 1.5524 |
| 4/17/2019 11:37 | 10.7917 | 11.1167 | 12.9283 | 10.9    | 5.1428 | 1.6917 | 0.2169 | 1.5665 |
| 4/17/2019 11:38 | 10.7333 | 10.875  | 13.1067 | 10.825  | 5.0618 | 1.6273 | 0.1969 | 1.5278 |
| 4/17/2019 11:39 | 10.7333 | 11.05   | 13.175  | 11.3917 | 5.0191 | 1.6636 | 0.2123 | 1.5289 |
| 4/17/2019 11:40 | 11.0917 | 12.2167 | 13.965  | 12.05   | 4.8123 | 1.6    | 0.1992 | 1.5396 |
| 4/17/2019 11:41 | 11.2833 | 11.1083 | 13.4917 | 11.5167 | 4.7749 | 1.6    | 0.1891 | 1.5334 |
| 4/17/2019 11:42 | 11.4583 | 12.0333 | 13.6233 | 12.3083 | 4.7454 | 1.6    | 0.2004 | 1.5296 |
| 4/17/2019 11:43 | 11.35   | 11.8917 | 13.7983 | 12.3917 | 4.6822 | 1.5182 | 0.1959 | 1.5265 |
| 4/17/2019 11:44 | 11.475  | 12.25   | 13.9567 | 12.4583 | 4.7113 | 1.5    | 0.2005 | 1.53   |
| 4/17/2019 11:45 | 11.3667 | 12.0583 | 12.97   | 11.6333 | 4.9519 | 1.5273 | 0.1978 | 1.539  |
| 4/17/2019 11:46 | 11.0833 | 10.7083 | 12.45   | 10.7833 | 6.6981 | 1.6273 | 0.1932 | 1.529  |
| 4/17/2019 11:47 | 10.525  | 9.8667  | 11.705  | 10.0583 | 7.7193 | 1.7909 | 0.1988 | 1.5483 |
| 4/17/2019 11:48 | 10.1083 | 10.1417 | 11.9067 | 10.1417 | 8.1426 | 1.9182 | 0.1905 | 1.5451 |
| 4/17/2019 11:49 | 9.9     | 9.325   | 11.3133 | 10.4417 | 8.2023 | 2      | 0.1971 | 1.5328 |
| 4/17/2019 11:50 | 9.8083  | 10.1833 | 11.6783 | 9.5333  | 8.1643 | 2.0833 | 0.1927 | 1.5318 |
| 4/17/2019 11:51 | 9.8167  | 10.4083 | 11.9033 | 10.3917 | 8.3251 | 2.1364 | 0.1822 | 1.5164 |
| 4/17/2019 11:52 | 9.825   | 10.0167 | 11.9517 | 10.7167 | 8.3382 | 2.2    | 0.1974 | 1.5497 |
| 4/17/2019 11:53 | 9.8818  | 10.5083 | 11.8517 | 9.9083  | 8.3647 | 2.2273 | 0.184  | 1.5447 |
| 4/17/2019 11:54 | 9.825   | 10.275  | 11.7533 | 9.7     | 8.2825 | 2.3    | 0.1749 | 1.5587 |
| 4/17/2019 11:55 | 9.85    | 10.1333 | 11.8933 | 9.7167  | 8.1973 | 2.3    | 0.1925 | 1.5683 |
| 4/17/2019 11:56 | 9.9083  | 10.4667 | 12.09   | 9.9083  | 8.0298 | 2.38   | 0.1773 | 1.5568 |
| 4/17/2019 11:57 | 10.1917 | 10.775  | 12.3    | 10.7417 | 7.8262 | 2.3417 | 0.1951 | 1.5472 |
| 4/17/2019 11:58 | 10.425  | 10.8833 | 12.5583 | 10.6833 | 7.7322 | 2.2545 | 0.1898 | 1.5364 |
| 4/17/2019 11:59 | 10.6417 | 11.0667 | 12.3233 | 11.575  | 7.5773 | 2.125  | 0.1812 | 1.5275 |
| 4/17/2019 12:00 | 10.7917 | 10.9167 | 13.4967 | 10.8417 | 7.2793 | 1.9833 | 0.1931 | 1.529  |
| 4/17/2019 12:01 | 10.9167 | 10.7583 | 12.6317 | 11.0917 | 7.1015 | 1.8818 | 0.1826 | 1.5208 |
| 4/17/2019 12:02 | 11      | 11.7083 | 12.9417 | 11.425  | 6.9243 | 1.8    | 0.1862 | 1.5496 |
| 4/17/2019 12:03 | 11.2833 | 12.0833 | 13.865  | 12.675  | 6.6652 | 1.77   | 0.1937 | 1.5224 |
| 4/17/2019 12:04 | 11.5583 | 11.7083 | 13.7583 | 12.0333 | 6.5487 | 1.7    | 0.1763 | 1.5071 |
| 4/17/2019 12:05 | 11.8333 | 12.8167 | 13.94   | 12.8167 | 6.4078 | 1.7    | 0.1922 | 1.5081 |
| 4/17/2019 12:06 | 12.05   | 13.125  | 14.455  | 12.7167 | 6.2381 | 1.675  | 0.1837 | 1.5323 |
| 4/17/2019 12:07 | 12.0167 | 11.3083 | 13.3333 | 11.8833 | 6.2876 | 1.6333 | 0.1799 | 1.5433 |
| 4/17/2019 12:08 | 12.1417 | 13.1667 | 14.4583 | 13.2917 | 6.2245 | 1.6636 | 0.1895 | 1.5249 |
| 4/17/2019 12:09 | 12.175  | 12.25   | 14.5633 | 13.1333 | 5.9993 | 1.6273 | 0.1752 | 1.5521 |
| 4/17/2019 12:10 | 12.4083 | 12.95   | 14.9717 | 13.5417 | 5.7989 | 1.7    | 0.1861 | 1.5376 |
| 4/17/2019 12:11 | 12.55   | 12.625  | 14.5033 | 12.9833 | 5.7342 | 1.7    | 0.1876 | 1.5205 |
| 4/17/2019 12:12 | 12.5583 | 13.1333 | 14.94   | 12.9583 | 5.6277 | 1.7    | 0.1684 | 1.5203 |
| 4/17/2019 12:13 | 12.725  | 12.875  | 14.8817 | 13.6667 | 5.4703 | 1.7    | 0.1863 | 1.5243 |
| 4/17/2019 12:14 | 13.0833 | 13.5917 | 15.6333 | 14.4583 | 5.2805 | 1.68   | 0.1929 | 1.5218 |
| 4/17/2019 12:15 | 13.3583 | 13.2333 | 15.0833 | 13.4667 | 5.1832 | 1.6    | 0.1852 | 1.539  |

|                 |         |         |          |         |         |          |         |        |
|-----------------|---------|---------|----------|---------|---------|----------|---------|--------|
| 4/17/2019 12:16 | 13.4    | 13.3083 | 14.7383  | 13.5417 | 5.213   | 1.6333   | 0.1832  | 1.5101 |
| 4/17/2019 12:17 | 13.1083 | 13.6167 | 15.1083  | 13.3667 | 5.2788  | 1.6      | 0.1825  | 1.5094 |
| 4/17/2019 12:18 | 12.875  | 13.0583 | 14.7117  | 12.8833 | 5.2453  | 1.6      | 0.1859  | 1.5396 |
| 4/17/2019 12:19 | 12.65   | 12.4583 | 14.385   | 12.6083 | 5.245   | 1.6      | 0.1832  | 1.5588 |
| 4/17/2019 12:20 | 12.3833 | 12.35   | 14.315   | 12.75   | 5.2298  | 1.5      | 0.1779  | 1.5784 |
| 4/17/2019 12:21 | 11.9833 | 11.2333 | 13.5117  | 11.8333 | 5.1942  | 1.5      | 0.193   | 1.599  |
| 4/17/2019 12:22 | 11.6167 | 12.3    | 13.4583  | 11.7917 | 5.1771  | 1.5      | 0.1753  | 1.6018 |
| 4/17/2019 12:23 | 11.3    | 11.0417 | 12.9717  | 11.4083 | 5.1673  | 1.5      | 0.1868  | 1.608  |
| 4/17/2019 12:24 | 11.2    | 11.15   | 13.4733  | 11.675  | 5.1752  | 1.5      | 0.1841  | 1.6219 |
| 4/17/2019 12:25 | 11.0333 | 10.5    | 12.71    | 10.325  | 5.1389  | 1.4667   | 0.1785  | 1.6214 |
| 4/17/2019 12:26 | 10.775  | 10.0167 | 12.4867  | 10.4167 | 5.0925  | 1.5      | 0.191   | 1.5928 |
| 4/17/2019 12:27 | 10.375  | 10.0833 | 12.2783  | 10.15   | 5.086   | 1.5      | 0.1793  | 1.6186 |
| 4/17/2019 12:28 | 10.075  | 9.8917  | 11.8583  | 9.6667  | 5.0846  | 1.5      | 0.1899  | 1.6247 |
| 4/17/2019 12:29 | 9.825   | 9.1333  | 11.8383  | 9.775   | 5.0506  | 1.5      | 0.1858  | 1.6201 |
| 4/17/2019 12:30 | 9.55    | 8.775   | 11.6767  | 9.4167  | 5.292   | 1.5636   | 0.1827  | 1.6323 |
| 4/17/2019 12:31 | 8.9417  | 8.2667  | 24.1417  | 9.0917  | 17.9022 | 2.3545   | 0.4853  | 1.7018 |
| 4/17/2019 12:32 | 7.8333  | 5.0583  | 59.5633  | 8.1667  | 30.0363 | 33.3182  | 1.3087  | 1.9547 |
| 4/17/2019 12:33 | 6.25    | 3.6667  | 48.36    | 5.2833  | 35.0073 | 33.08    | 1.0937  | 1.9537 |
| 4/17/2019 12:34 | 4.1833  | 1.3083  | 138.7983 | 6.4167  | 58.8372 | 73.6182  | 4.0187  | 2.4443 |
| 4/17/2019 12:35 | 2.35    | 2.9167  | 285.25   | 8.8667  | 63.0909 | 93.45    | 6.3338  | 3.2149 |
| 4/17/2019 12:36 | 1       | -0.3083 | 433.1833 | 7.6917  | 66.9568 | 96.9818  | 9.1535  | 4.2088 |
| 4/17/2019 12:37 | 0.4583  | -0.6417 | 519.2167 | 5.4667  | 64.9378 | 96.3     | 10.2722 | 4.783  |
| 4/17/2019 12:38 | 0.2917  | 0.0833  | 363.0667 | 3.1     | 58.8214 | 70.7     | 6.5412  | 4.1053 |
| 4/17/2019 12:39 | 0.2     | -0.6833 | 531.1166 | 6.2083  | 77.2038 | 90.2546  | 9.4265  | 4.8385 |
| 4/17/2019 12:40 | 0.2167  | -1.2    | 298.75   | 1.3167  | 61.7385 | 101.4727 | 6.1472  | 4.1228 |
| 4/17/2019 12:41 | 0.2667  | -0.15   | 335.3833 | 3.5917  | 66.9634 | 89.4091  | 7.6832  | 3.9253 |
| 4/17/2019 12:42 | 0.3     | -0.425  | 314.55   | 2.275   | 58.6864 | 91.8727  | 7.2455  | 4.0662 |
| 4/17/2019 12:43 | 0.3     | -0.7    | 247.0833 | 0.7333  | 60.494  | 79.6167  | 5.775   | 3.7503 |
| 4/17/2019 12:44 | 0.3     | 0.925   | 224.4833 | 2.2917  | 58.7158 | 90.3273  | 6.4983  | 3.7182 |
| 4/17/2019 12:45 | 0.3     | -0.3333 | 265.15   | 2.7917  | 61.2142 | 90.3583  | 9.4848  | 4.1119 |
| 4/17/2019 12:46 | 0.2917  | 0.3917  | 243.0833 | 2.0083  | 57.9138 | 80.5727  | 8.3543  | 4.0243 |
| 4/17/2019 12:47 | 0.2     | -0.3833 | 227.7333 | 1.375   | 55.0442 | 79.8909  | 8.0005  | 3.8727 |
| 4/17/2019 12:48 | 0.2083  | -0.1    | 209.3    | 1.15    | 53.6489 | 80.0917  | 7.3613  | 3.6262 |
| 4/17/2019 12:49 | 0.2     | -0.6833 | 206.4    | 1.55    | 53.8118 | 82.025   | 8.1677  | 3.6032 |
| 4/17/2019 12:50 | 0.2     | -0.275  | 193.85   | 1.45    | 51.8665 | 78.5455  | 7.9073  | 3.5182 |
| 4/17/2019 12:51 | 0.2     | 0.0917  | 185.0667 | 1.15    | 50.7941 | 76.3833  | 7.6068  | 3.4762 |
| 4/17/2019 12:52 | 0.1833  | 0.4583  | 183.4667 | 1.0583  | 49.9538 | 76.4083  | 7.9632  | 3.4908 |
| 4/17/2019 12:53 | 0.1     | 0.325   | 180.7333 | 1.375   | 48.7133 | 76.2667  | 8.2288  | 3.5053 |
| 4/17/2019 12:54 | 0.1     | -0.3833 | 178.25   | 1.0417  | 48.0391 | 76.2417  | 7.854   | 3.4658 |
| 4/17/2019 12:55 | 0.1     | -0.1667 | 178.35   | 1.0333  | 48.0399 | 76.475   | 8.3863  | 3.4743 |
| 4/17/2019 12:56 | 0.1     | -0.4333 | 156.9333 | 0.975   | 45.4279 | 76.0167  | 6.4442  | 3.3123 |
| 4/17/2019 12:57 | 0.175   | -0.3917 | 151.4667 | 1.025   | 44.8328 | 75.3818  | 6.4222  | 3.2283 |
| 4/17/2019 12:58 | 0.2     | -0.2333 | 153.55   | 0.8833  | 45.3558 | 74.9667  | 6.4263  | 3.2469 |
| 4/17/2019 12:59 | 0.1     | 0.5583  | 155.175  | 1.875   | 45.7946 | 74.6909  | 6.3513  | 3.2679 |
| 4/17/2019 13:00 | 0.1     | 0.175   | 151.0417 | 1.0833  | 44.8634 | 74.47    | 6.5528  | 3.2464 |
| 4/17/2019 13:01 | 0.1     | -0.2417 | 141.7583 | 0.8333  | 43.0659 | 73.8364  | 6.2028  | 3.235  |
| 4/17/2019 13:02 | 0.0917  | -0.175  | 147.5583 | 1.7083  | 43.7299 | 73.3546  | 6.1368  | 3.2353 |



|                 |        |         |          |         |         |         |        |        |
|-----------------|--------|---------|----------|---------|---------|---------|--------|--------|
| 4/17/2019 13:03 | 0      | -0.35   | 146.75   | 0.8083  | 43.8858 | 73.1667 | 6.8698 | 3.2413 |
| 4/17/2019 13:04 | 0      | -0.0917 | 141.45   | 0.75    | 42.4197 | 72.8    | 6.3933 | 3.1678 |
| 4/17/2019 13:05 | 0      | -0.8167 | 140.5083 | 0.3     | 42.1006 | 72.1364 | 6.1208 | 3.1777 |
| 4/17/2019 13:06 | 0      | 0.0917  | 139.3833 | 0.6583  | 41.8248 | 71.56   | 6.079  | 3.174  |
| 4/17/2019 13:07 | 0      | 0.7917  | 139.3167 | 0.65    | 41.7628 | 70.8273 | 6.052  | 3.1715 |
| 4/17/2019 13:08 | 0      | 0.4     | 129.075  | 0.4     | 39.5796 | 70.23   | 5.6903 | 3.1383 |
| 4/17/2019 13:09 | 0.025  | -0.4833 | 128.325  | 0.8417  | 39.0597 | 69.975  | 5.6462 | 3.1247 |
| 4/17/2019 13:10 | 0.1    | -0.0583 | 126.9833 | 0.5083  | 38.7111 | 69.6546 | 5.6343 | 3.1148 |
| 4/17/2019 13:11 | 0.1    | -0.525  | 125.2167 | 0.5667  | 38.3921 | 69.1556 | 5.6622 | 3.1005 |
| 4/17/2019 13:12 | 0.05   | 0.2917  | 121.1917 | 0.425   | 37.2447 | 68.2667 | 5.4618 | 3.0601 |
| 4/17/2019 13:13 | 0      | -0.1333 | 121.7583 | 0.1417  | 37.3575 | 67.7167 | 5.4963 | 3.071  |
| 4/17/2019 13:14 | 0      | 0.4083  | 113.7667 | 0.4917  | 35.3461 | 67.16   | 5.199  | 2.9953 |
| 4/17/2019 13:15 | 0      | -0.3417 | 115.2833 | 0.275   | 35.6263 | 66.1546 | 5.2713 | 3.0301 |
| 4/17/2019 13:16 | 0.1    | 0.3083  | 114.3417 | 0.7583  | 35.3406 | 65.3909 | 5.2773 | 2.9995 |
| 4/17/2019 13:17 | 0.05   | 0.4417  | 111.4917 | -0.1833 | 34.7328 | 64.55   | 5.1707 | 2.9765 |
| 4/17/2019 13:18 | 0.075  | -0.0083 | 107.2833 | 0.35    | 33.6651 | 63.63   | 5.0395 | 2.9508 |
| 4/17/2019 13:19 | 0      | 0.4083  | 104.8667 | 0.525   | 33.046  | 62.6    | 4.9272 | 2.9226 |
| 4/17/2019 13:20 | 0      | -0.6167 | 112.2417 | 0.9917  | 34.6687 | 62.2    | 5.2197 | 2.9913 |
| 4/17/2019 13:21 | 0      | -0.475  | 99.3617  | 0.7     | 32.1312 | 61.725  | 4.8348 | 2.9137 |
| 4/17/2019 13:22 | 0.0917 | 0.15    | 102.8467 | 0.525   | 32.066  | 61.02   | 4.8827 | 2.9445 |
| 4/17/2019 13:23 | 0.1    | 0.2667  | 106.1167 | 0.4     | 32.8848 | 60.4818 | 5.0083 | 2.9991 |
| 4/17/2019 13:24 | 0.0636 | -0.1417 | 101.5683 | 0.2917  | 31.8606 | 60.04   | 4.8785 | 2.9231 |
| 4/17/2019 13:25 | 0      | 0.1667  | 100.3717 | -0.1667 | 31.3001 | 59.5909 | 4.8555 | 2.9326 |
| 4/17/2019 13:26 | 0.0083 | 0.3167  | 97.2808  | 0.1083  | 30.6911 | 59      | 4.7865 | 2.904  |
| 4/17/2019 13:27 | 0.0833 | -0.1667 | 91.8667  | 0.1333  | 29.6606 | 58.52   | 4.6322 | 2.8828 |
| 4/17/2019 13:28 | 0.1    | 0.525   | 93.3358  | 0.15    | 29.508  | 57.84   | 4.6503 | 2.8835 |
| 4/17/2019 13:29 | 0.1083 | -0.5083 | 92.4917  | -0.05   | 29.5086 | 57.2727 | 4.6402 | 2.8679 |
| 4/17/2019 13:30 | 0.1167 | 0.2667  | 94.105   | 0.5417  | 29.5015 | 56.91   | 4.7058 | 2.8928 |
| 4/17/2019 13:31 | 0.15   | -0.0333 | 92.6075  | 0.0417  | 28.8909 | 56.7    | 4.6558 | 2.8721 |
| 4/17/2019 13:32 | 0.15   | -0.15   | 89.8267  | -0.225  | 28.2471 | 56.1083 | 4.5727 | 2.8506 |
| 4/17/2019 13:33 | 0.175  | 0.525   | 89.8033  | -0.125  | 27.9568 | 55.46   | 4.5803 | 2.849  |
| 4/17/2019 13:34 | 0.1833 | 0.3917  | 88.7983  | -0.1    | 27.6712 | 55.0917 | 4.5913 | 2.8744 |
| 4/17/2019 13:35 | 0.1333 | 0.4417  | 86.035   | 0.4167  | 27.1711 | 54.5083 | 4.4855 | 2.8771 |
| 4/17/2019 13:36 | 0.1    | 0.675   | 82.9825  | 0.1333  | 26.4308 | 53.9    | 4.4052 | 2.834  |
| 4/17/2019 13:37 | 0.1    | 0.9083  | 82.2625  | 0.75    | 26.1388 | 53.3667 | 4.3648 | 2.8603 |
| 4/17/2019 13:38 | 0.1    | -0.125  | 83.5325  | 0.3083  | 26.2708 | 52.96   | 4.4128 | 2.8572 |
| 4/17/2019 13:39 | 0.1    | -0.4833 | 79.9725  | -0.2083 | 25.4928 | 52.6364 | 4.3337 | 2.8306 |
| 4/17/2019 13:40 | 0.1    | 0.625   | 78.9642  | -0.3417 | 25.0162 | 52.2167 | 4.2888 | 2.8077 |
| 4/17/2019 13:41 | 0.1    | 0.425   | 80.2275  | 0.3667  | 25.2231 | 51.8818 | 4.3538 | 2.8048 |
| 4/17/2019 13:42 | 0.1083 | -0.175  | 82.6592  | 0.65    | 25.7583 | 51.6545 | 4.4517 | 2.7971 |
| 4/17/2019 13:43 | 0.1583 | 0.1083  | 80.9208  | 0.3583  | 25.2448 | 51.3833 | 4.3947 | 2.7863 |
| 4/17/2019 13:44 | 0.1167 | 0.0083  | 78.3133  | 0.5917  | 24.6077 | 51.06   | 4.3172 | 2.8003 |
| 4/17/2019 13:45 | 0.2    | -0.5417 | 76.6217  | 0.0167  | 24.1076 | 50.7    | 4.2418 | 2.7548 |
| 4/17/2019 13:46 | 0.1083 | 0.2833  | 74.7125  | 0.1083  | 23.6858 | 50.3636 | 4.2012 | 2.7785 |
| 4/17/2019 13:47 | 0.1    | -0.025  | 73.1242  | 0.425   | 23.2443 | 50.0417 | 4.1537 | 2.7697 |
| 4/17/2019 13:48 | 0.0833 | 0.125   | 74.3042  | 0.3167  | 23.3749 | 49.7667 | 4.1855 | 2.7539 |
| 4/17/2019 13:49 | 0.1    | -0.075  | 72.6025  | 0.325   | 22.98   | 49.5    | 4.1513 | 2.7464 |

|                 |     |         |         |        |         |         |        |        |
|-----------------|-----|---------|---------|--------|---------|---------|--------|--------|
| 4/17/2019 13:50 | 0.1 | 0.3667  | 71.445  | 0.0167 | 22.4823 | 49.2083 | 4.0637 | 2.7168 |
| 4/17/2019 13:51 | 0.1 | -0.6    | 67.5792 | 0.25   | 21.7079 | 48.7818 | 3.9478 | 2.7221 |
| 4/17/2019 13:52 | 0.1 | -0.1917 | 61.6667 | 0.7667 | 20.4203 | 48.1909 | 3.7142 | 2.6511 |
| 4/17/2019 13:53 |     |         |         |        |         |         | 3.8817 | 2.6709 |
| 4/17/2019 13:54 |     |         |         |        |         |         | 3.6905 | 2.5976 |
| 4/17/2019 13:55 |     |         |         |        |         |         | 3.2235 | 2.5273 |
| 4/17/2019 13:56 |     |         |         |        |         |         | 2.827  | 2.4141 |
| 4/17/2019 13:57 |     |         |         |        |         |         | 2.4518 | 2.2943 |
| 4/17/2019 13:58 |     |         |         |        |         |         | 2.0967 | 2.1553 |
| 4/17/2019 13:59 |     |         |         |        |         |         | 2.0047 | 2.105  |
| 4/17/2019 14:00 |     |         |         |        |         |         | 1.7608 | 2.0328 |
| 4/17/2019 14:01 |     |         |         |        |         |         | 1.5403 | 1.9723 |
| 4/17/2019 14:02 |     |         |         |        |         |         | 1.439  | 1.9329 |
| 4/17/2019 14:03 |     |         |         |        |         |         | 1.3445 | 1.8943 |
| 4/17/2019 14:04 |     |         |         |        |         |         | 1.2295 | 1.8586 |
| 4/17/2019 14:05 |     |         |         |        |         |         | 1.1245 | 1.82   |
| 4/17/2019 14:06 |     |         |         |        |         |         | 1.0142 | 1.7983 |
| 4/17/2019 14:07 |     |         |         |        |         |         | 0.9631 | 1.779  |
| 4/17/2019 14:08 |     |         |         |        |         |         | 0.8895 | 1.988  |
| 4/17/2019 14:09 |     |         |         |        |         |         | 0.825  | 1.9858 |
| 4/17/2019 14:10 |     |         |         |        |         |         | 0.7531 | 1.8608 |
| 4/17/2019 14:11 |     |         |         |        |         |         | 0.7067 | 1.7765 |
| 4/17/2019 14:12 |     |         |         |        |         |         | 0.6636 | 1.7399 |
| 4/17/2019 14:13 |     |         |         |        |         |         | 0.6084 | 1.7345 |
| 4/17/2019 14:14 |     |         |         |        |         |         | 0.5705 | 1.6906 |
| 4/17/2019 14:15 |     |         |         |        |         |         | 0.5368 | 1.6683 |
| 4/17/2019 14:16 |     |         |         |        |         |         | 0.5    | 1.6713 |
| 4/17/2019 14:17 |     |         |         |        |         |         | 0.492  | 1.6729 |
| 4/17/2019 14:18 |     |         |         |        |         |         | 0.4665 | 1.6439 |
| 4/17/2019 14:19 |     |         |         |        |         |         | 0.4218 | 1.5997 |
| 4/17/2019 14:20 |     |         |         |        |         |         | 0.4009 | 1.5915 |
| 4/17/2019 14:21 |     |         |         |        |         |         | 0.3797 | 1.6052 |
| 4/17/2019 14:22 |     |         |         |        |         |         | 0.3711 | 1.6119 |
| 4/17/2019 14:23 |     |         |         |        |         |         | 0.3589 | 1.5799 |
| 4/17/2019 14:24 |     |         |         |        |         |         | 0.3335 | 1.5713 |
| 4/17/2019 14:25 |     |         |         |        |         |         | 0.3252 | 1.5497 |
| 4/17/2019 14:26 |     |         |         |        |         |         | 0.3062 | 1.5413 |
| 4/17/2019 14:27 |     |         |         |        |         |         | 0.2813 | 1.5351 |
| 4/17/2019 14:28 |     |         |         |        |         |         | 0.2857 | 1.5152 |
| 4/17/2019 14:29 |     |         |         |        |         |         | 0.2695 | 1.4988 |
| 4/17/2019 14:30 |     |         |         |        |         |         | 0.2461 | 1.5079 |
| 4/17/2019 14:31 |     |         |         |        |         |         | 0.2484 | 1.4838 |
| 4/17/2019 14:32 |     |         |         |        |         |         | 0.2264 | 1.4763 |
| 4/17/2019 14:33 |     |         |         |        |         |         | 0.2305 | 1.4793 |
| 4/17/2019 14:34 |     |         |         |        |         |         | 0.2373 | 1.484  |
| 4/17/2019 14:35 |     |         |         |        |         |         | 0.2363 | 1.4751 |
| 4/17/2019 14:36 |     |         |         |        |         |         | 0.2393 | 1.4745 |

|                 |        |        |
|-----------------|--------|--------|
| 4/17/2019 14:37 | 0.2521 | 1.4682 |
| 4/17/2019 14:38 | 0.2448 | 1.4767 |
| 4/17/2019 14:39 | 0.2427 | 1.4551 |
| 4/17/2019 14:40 | 0.2307 | 1.4557 |
| 4/17/2019 14:41 | 0.217  | 1.4602 |
| 4/17/2019 14:42 | 0.2189 | 1.4448 |
| 4/17/2019 14:43 | 0.2069 | 1.4335 |
| 4/17/2019 14:44 | 0.221  | 1.4405 |
| 4/17/2019 14:45 | 0.2318 | 1.4357 |
| 4/17/2019 14:46 | 0.2222 | 1.4351 |
| 4/17/2019 14:47 | 0.2116 | 1.4438 |
| 4/17/2019 14:48 | 0.2133 | 1.4516 |
| 4/17/2019 14:49 | 0.197  | 1.4485 |
| 4/17/2019 14:50 | 0.1987 | 1.4428 |
| 4/17/2019 14:51 | 0.2036 | 1.4058 |
| 4/17/2019 14:52 | 0.1782 | 1.4188 |
| 4/17/2019 14:53 | 0.1904 | 1.4462 |
| 4/17/2019 14:54 | 0.1839 | 1.4207 |
| 4/17/2019 14:55 | 0.1769 | 1.408  |
| 4/17/2019 14:56 | 0.1806 | 1.4459 |
| 4/17/2019 14:57 | 0.1732 | 1.4575 |
| 4/17/2019 14:58 | 0.1674 | 1.4798 |
| 4/17/2019 14:59 | 0.1773 | 1.481  |
| 4/17/2019 15:00 | 0.1634 | 1.4387 |
| 4/17/2019 15:01 | 0.1654 | 1.4352 |
| 4/17/2019 15:02 | 0.1726 | 1.4438 |
| 4/17/2019 15:03 | 0.1635 | 1.4545 |
| 4/17/2019 15:04 | 0.163  | 1.4508 |
| 4/17/2019 15:05 | 0.1672 | 1.4293 |
| 4/17/2019 15:06 | 0.1948 | 1.4126 |
| 4/17/2019 15:07 | 0.3184 | 1.4048 |
| 4/17/2019 15:08 | 0.2703 | 1.4005 |
| 4/17/2019 15:09 | 0.2514 | 1.4118 |
| 4/17/2019 15:10 | 0.2455 | 1.4398 |
| 4/17/2019 15:11 | 0.2202 | 1.4429 |
| 4/17/2019 15:12 | 0.214  | 1.4412 |
| 4/17/2019 15:13 | 0.2146 | 1.4109 |
| 4/17/2019 15:14 | 0.1928 | 1.4346 |
| 4/17/2019 15:15 | 0.2022 | 1.4123 |
| 4/17/2019 15:16 | 0.1986 | 1.4088 |
| 4/17/2019 15:17 | 0.192  | 1.4298 |
| 4/17/2019 15:18 | 0.1939 | 1.4441 |
| 4/17/2019 15:19 | 0.1893 | 1.4334 |
| 4/17/2019 15:20 | 0.1759 | 1.4265 |
| 4/17/2019 15:21 | 0.1784 | 1.4344 |
| 4/17/2019 15:22 | 0.181  | 1.4395 |
| 4/17/2019 15:23 | 0.1694 | 1.441  |

|                 |        |        |
|-----------------|--------|--------|
| 4/17/2019 15:24 | 0.1771 | 1.4441 |
| 4/17/2019 15:25 | 0.1671 | 1.4438 |
| 4/17/2019 15:26 | 0.1627 | 1.4467 |
| 4/17/2019 15:27 | 0.1701 | 1.4309 |
| 4/17/2019 15:28 | 0.1563 | 1.4235 |
| 4/17/2019 15:29 | 0.154  | 1.4501 |
| 4/17/2019 15:30 | 0.1566 | 1.4479 |
| 4/17/2019 15:31 | 0.1493 | 1.4384 |
| 4/17/2019 15:32 | 0.1501 | 1.4573 |
| 4/17/2019 15:33 | 0.1533 | 1.4295 |
| 4/17/2019 15:34 | 0.1445 | 1.4243 |
| 4/17/2019 15:35 | 0.1528 | 1.4563 |
| 4/17/2019 15:36 | 0.1485 | 1.4556 |
| 4/17/2019 15:37 | 0.1368 | 1.4454 |
| 4/17/2019 15:38 | 0.1467 | 1.4301 |
| 4/17/2019 15:39 | 0.1472 | 1.4148 |
| 4/17/2019 15:40 | 0.14   | 1.4043 |
| 4/17/2019 15:41 | 0.1453 | 1.4133 |
| 4/17/2019 15:42 | 0.1369 | 1.4313 |
| 4/17/2019 15:43 | 0.1408 | 1.4332 |
| 4/17/2019 15:44 | 0.1731 | 1.4355 |
| 4/17/2019 15:45 | 0.1454 | 1.4005 |
| 4/17/2019 15:46 | 0.1456 | 1.4133 |
| 4/17/2019 15:47 | 0.1561 | 1.4188 |
| 4/17/2019 15:48 | 0.1806 | 1.417  |
| 4/17/2019 15:49 | 0.1817 | 1.4227 |
| 4/17/2019 15:50 | 0.1683 | 1.4321 |
| 4/17/2019 15:51 | 0.1531 | 1.4543 |
| 4/17/2019 15:52 | 0.174  | 1.4646 |
| 4/17/2019 15:53 | 0.1773 | 1.4521 |
| 4/17/2019 15:54 | 0.1646 | 1.448  |
| 4/17/2019 15:55 | 0.1745 | 1.4469 |
| 4/17/2019 15:56 | 0.1689 | 1.4714 |
| 4/17/2019 15:57 | 0.1659 | 1.4838 |
| 4/17/2019 15:58 | 0.1721 | 1.5037 |
| 4/17/2019 15:59 | 0.1676 | 1.5135 |
| 4/17/2019 16:00 | 0.1724 | 1.5352 |
| 4/17/2019 16:01 | 0.1766 | 1.5237 |
| 4/17/2019 16:02 | 0.1656 | 1.5485 |
| 4/17/2019 16:03 | 0.1833 | 1.5543 |
| 4/17/2019 16:04 | 0.1793 | 1.5226 |
| 4/17/2019 16:05 | 0.1712 | 1.543  |
| 4/17/2019 16:06 | 0.1862 | 1.5754 |
| 4/17/2019 16:07 | 0.1708 | 1.5633 |
| 4/17/2019 16:08 | 0.1781 | 1.545  |
| 4/17/2019 16:09 | 0.186  | 1.571  |
| 4/17/2019 16:10 | 0.177  | 1.5643 |

|                 |        |        |         |        |        |        |        |        |
|-----------------|--------|--------|---------|--------|--------|--------|--------|--------|
| 4/17/2019 16:11 |        |        |         |        |        |        | 0.1854 | 1.5522 |
| 4/17/2019 16:12 |        |        |         |        |        |        | 0.1804 | 1.5219 |
| 4/17/2019 16:13 |        |        |         |        |        |        | 0.1727 | 1.5353 |
| 4/17/2019 16:14 |        |        |         |        |        |        | 0.1867 | 1.5648 |
| 4/17/2019 16:15 |        |        |         |        |        |        | 0.1762 | 1.5883 |
| 4/17/2019 16:16 |        |        |         |        |        |        | 0.1815 | 1.6154 |
| 4/17/2019 16:17 |        |        |         |        |        |        | 0.1878 | 1.625  |
| 4/17/2019 16:18 |        |        |         |        |        |        | 0.1791 | 1.6108 |
| 4/17/2019 16:19 |        |        |         |        |        |        | 0.1827 | 1.6063 |
| 4/17/2019 16:20 | 7.3833 | 6.6167 | 11.6275 | 6.625  | 2.6238 | 1.6091 | 0.1769 | 1.5939 |
| 4/17/2019 16:21 | 7.1667 | 6.8833 | 11.1967 | 7.0667 | 2.6423 | 1.7    | 0.1771 | 1.5942 |
| 4/17/2019 16:22 | 7.0083 | 7.2    | 10.9775 | 6.675  | 2.6358 | 1.7    | 0.1873 | 1.5851 |
| 4/17/2019 16:23 | 6.8667 | 7.0833 | 11.1058 | 6.2    | 2.6448 | 1.7    | 0.1775 | 1.6087 |
| 4/17/2019 16:24 | 6.6583 | 6.65   | 10.9042 | 6.7083 | 2.6257 | 1.7    | 0.1898 | 1.6126 |
| 4/17/2019 16:25 | 6.5083 | 6.55   | 10.6208 | 5.8333 | 2.6137 | 1.7818 | 0.1922 | 1.6475 |
| 4/17/2019 16:26 | 6.3417 | 5.8667 | 10.5425 | 6.3833 | 2.6273 | 1.8    | 0.1794 | 1.6519 |
| 4/17/2019 16:27 | 6.2167 | 5.6    | 10.5083 | 5.95   | 2.6538 | 1.8    | 0.1944 | 1.6243 |
| 4/17/2019 16:28 | 5.9909 | 5.65   | 10.2683 | 5.5333 | 2.6433 | 1.8    | 0.1831 | 1.5946 |
| 4/17/2019 16:29 | 5.7917 | 5.3    | 10.0144 | 5.375  | 2.6308 | 1.8    | 0.1876 | 1.6321 |
| 4/17/2019 16:30 | 5.6167 | 5.2833 | 9.8299  | 5.2667 | 2.6483 | 1.8    | 0.1925 | 1.665  |
| 4/17/2019 16:31 | 5.45   | 5.4667 | 9.7609  | 4.8417 | 2.6383 | 1.8    | 0.1789 | 1.6696 |
| 4/17/2019 16:32 | 5.275  | 4.9333 | 9.3123  | 5.5    | 2.64   | 1.9    | 0.1889 | 1.6768 |
| 4/17/2019 16:33 | 5.0333 | 4.6    | 9.3328  | 4.7    | 2.6197 | 1.9    | 0.1804 | 1.6808 |
| 4/17/2019 16:34 | 4.85   | 4.25   | 9.0749  | 4.5667 | 2.5413 | 1.9909 | 0.1847 | 1.6471 |
| 4/17/2019 16:35 | 4.675  | 3.3333 | 8.7911  | 4.7083 | 2.5251 | 1.975  | 0.1841 | 1.6697 |
| 4/17/2019 16:36 | 4.5583 | 3.9833 | 8.4343  | 3.9667 | 2.5387 | 1.9636 | 0.1734 | 1.6458 |
| 4/17/2019 16:37 | 4.4083 | 3.5167 | 7.9298  | 3.775  | 2.5324 | 2      | 0.184  | 1.646  |
| 4/17/2019 16:38 | 4.2583 | 3.0333 | 7.7608  | 3.6917 | 2.5304 | 2.0273 | 0.179  | 1.6657 |
| 4/17/2019 16:39 | 4      | 3.3167 | 7.6268  | 3.2833 | 2.5359 | 2.1    | 0.1729 | 1.6798 |
| 4/17/2019 16:40 | 3.775  | 2.8333 | 7.4808  | 3.55   | 2.5668 | 2.1167 | 0.1859 | 1.6761 |
| 4/17/2019 16:41 | 3.5333 | 3.2167 | 7.1678  | 3.3083 | 2.5595 | 2.2    | 0.1708 | 1.6676 |
| 4/17/2019 16:42 | 3.3583 | 3.6    | 6.9417  | 2.95   | 2.5598 | 2.3    | 0.1785 | 1.6693 |
| 4/17/2019 16:43 | 3.275  | 3.1    | 6.9445  | 2.8    | 2.5466 | 2.3333 | 0.182  | 1.6588 |
| 4/17/2019 16:44 | 3.2    | 2.3    | 6.881   | 2.1833 | 2.5578 | 2.4    | 0.1735 | 1.6901 |
| 4/17/2019 16:45 | 3.175  | 2.8333 | 6.8543  | 2.475  | 2.5644 | 2.4    | 0.1796 | 1.6895 |
| 4/17/2019 16:46 | 3.1    | 2.85   | 6.929   | 2.125  | 2.5578 | 2.4    | 0.178  | 1.6907 |
| 4/17/2019 16:47 | 3.1    | 2.4    | 6.6213  | 2.6167 | 2.5648 | 2.4182 | 0.1769 | 1.6885 |
| 4/17/2019 16:48 | 3.0083 | 2.0667 | 6.5548  | 2.2667 | 2.5484 | 2.5    | 0.1836 | 1.7087 |
| 4/17/2019 16:49 | 2.9083 | 2.4833 | 6.5018  | 2.3    | 2.5578 | 2.5    | 0.1613 | 1.6983 |
| 4/17/2019 16:50 | 2.8667 | 2.7833 | 6.4978  | 3.125  | 2.5498 | 2.5    | 0.1806 | 1.6917 |
| 4/17/2019 16:51 | 2.8    | 2.1    | 6.7035  | 2.125  | 2.5525 | 2.54   | 0.177  | 1.7286 |
| 4/17/2019 16:52 | 2.8    | 3.1333 | 6.6724  | 2.225  | 2.5923 | 2.55   | 0.1738 | 1.7378 |
| 4/17/2019 16:53 | 2.8    | 2.6667 | 6.6242  | 2.2417 | 2.5875 | 2.5    | 0.1733 | 1.7271 |
| 4/17/2019 16:54 | 2.8    | 2.1667 | 6.3459  | 2.85   | 2.5726 | 2.5    | 0.1693 | 1.7211 |
| 4/17/2019 16:55 | 2.8    | 1.7    | 6.7119  | 2.5917 | 2.5601 | 2.5    | 0.1735 | 1.7343 |
| 4/17/2019 16:56 | 2.7083 | 2.2333 | 6.7199  | 2.375  | 2.5788 | 2.5    | 0.1741 | 1.7258 |
| 4/17/2019 16:57 | 2.7    | 2.8    | 6.7388  | 2.7333 | 2.6045 | 2.5    | 0.1637 | 1.7221 |

|                 |        |        |        |        |        |        |        |        |
|-----------------|--------|--------|--------|--------|--------|--------|--------|--------|
| 4/17/2019 16:58 | 2.6909 | 2.3333 | 6.7408 | 2.7083 | 2.5958 | 2.5    | 0.1805 | 1.6935 |
| 4/17/2019 16:59 | 2.7    | 2.2833 | 6.4881 | 2.7667 | 2.6065 | 2.5    | 0.1603 | 1.6908 |
| 4/17/2019 17:00 | 2.7917 | 2.85   | 6.6843 | 3.2333 | 2.6176 | 2.5    | 0.1842 | 1.6893 |
| 4/17/2019 17:01 | 2.7833 | 2.15   | 6.4518 | 2.0417 | 2.6148 | 2.5    | 0.1737 | 1.7045 |
| 4/17/2019 17:02 | 2.7333 | 2.3333 | 6.4821 | 2.1417 | 2.6269 | 2.5    | 0.1705 | 1.7064 |
| 4/17/2019 17:03 | 2.75   | 2.4833 | 6.3542 | 2.4333 | 2.6458 | 2.5    | 0.1816 | 1.7205 |
| 4/17/2019 17:04 | 2.7    | 2.05   | 6.6373 | 1.9583 | 2.6373 | 2.5    | 0.1674 | 1.7599 |
| 4/17/2019 17:05 | 2.7    | 1.7833 | 6.4409 | 1.725  | 2.6203 | 2.5    | 0.177  | 1.7468 |
| 4/17/2019 17:06 | 2.7    | 2.5333 | 6.6183 | 1.85   | 2.6158 | 2.5091 | 0.1828 | 1.7122 |
| 4/17/2019 17:07 | 2.7    | 2.2    | 6.4422 | 2.0083 | 2.6202 | 2.6    | 0.1658 | 1.7258 |
| 4/17/2019 17:08 | 2.7    | 2.65   | 6.2643 | 2.1917 | 2.6314 | 2.6    | 0.1793 | 1.725  |
| 4/17/2019 17:09 | 2.6167 | 3.0333 | 6.5125 | 2.575  | 2.639  | 2.6    | 0.1693 | 1.7142 |
| 4/17/2019 17:10 | 2.625  | 3.0333 | 6.837  | 2.575  | 2.6463 | 2.6    | 0.1725 | 1.733  |
| 4/17/2019 17:11 | 2.6667 | 2.3667 | 6.7909 | 2.3    | 2.6511 | 2.6    | 0.181  | 1.7464 |
| 4/17/2019 17:12 | 2.6917 | 2.6833 | 6.6278 | 2.5667 | 2.6587 | 2.6    | 0.1699 | 1.755  |
| 4/17/2019 17:13 | 2.65   | 2.4833 | 6.7638 | 1.8417 | 2.6328 | 2.6    | 0.1783 | 1.75   |
| 4/17/2019 17:14 | 2.6    | 2.4167 | 6.5648 | 2.2917 | 2.6221 | 2.6    | 0.1739 | 1.7587 |
| 4/17/2019 17:15 | 2.5083 | 2.4167 | 6.3379 | 1.6917 | 2.6039 | 2.6    | 0.173  | 1.7361 |
| 4/17/2019 17:16 | 2.5    | 1.6333 | 6.7239 | 1.6917 | 2.6531 | 2.6    | 0.1806 | 1.6999 |
| 4/17/2019 17:17 | 2.5    | 2.3667 | 6.7058 | 2.25   | 2.6633 | 2.6    | 0.1728 | 1.7293 |
| 4/17/2019 17:18 | 2.6083 | 2.35   | 6.6377 | 2.0417 | 2.6632 | 2.6    | 0.1784 | 1.7251 |
| 4/17/2019 17:19 | 2.8333 | 3.3167 | 7.1924 | 2.75   | 2.6707 | 2.5333 | 0.1779 | 1.7062 |
| 4/17/2019 17:20 | 3.1583 | 3.1667 | 7.6647 | 3.4417 | 2.6403 | 2.5    | 0.162  | 1.7033 |
| 4/17/2019 17:21 | 3.4333 | 3.1667 | 7.3239 | 3.1917 | 2.6383 | 2.5    | 0.1761 | 1.6996 |
| 4/17/2019 17:22 | 3.5    | 3.6    | 7.5734 | 3.7333 | 2.6489 | 2.5    | 0.1685 | 1.6937 |
| 4/17/2019 17:23 | 3.5    | 3.3333 | 7.4396 | 3.3333 | 2.6623 | 2.5    | 0.1695 | 1.6924 |
| 4/17/2019 17:24 | 3.5583 | 3.0333 | 7.3225 | 3.275  | 2.6534 | 2.41   | 0.1792 | 1.7215 |
| 4/17/2019 17:25 | 3.55   | 3.7833 | 7.2361 | 3.3    | 2.6503 | 2.4    | 0.1622 | 1.7413 |
| 4/17/2019 17:26 | 3.6    | 3.1667 | 7.3679 | 3.3167 | 2.6338 | 2.4    | 0.174  | 1.6947 |
| 4/17/2019 17:27 | 3.6    | 3.75   | 7.3524 | 3.2417 | 2.626  | 2.38   | 0.1696 | 1.6462 |
| 4/17/2019 17:28 | 3.7182 | 4.2667 | 7.8214 | 3.6917 | 2.652  | 2.3    | 0.1688 | 1.6476 |
| 4/17/2019 17:29 | 3.7917 | 3.4667 | 7.573  | 4.0167 | 2.6351 | 2.3    | 0.175  | 1.6287 |
| 4/17/2019 17:30 | 3.8333 | 3.95   | 7.4296 | 2.9083 | 2.6364 | 2.3    | 0.1649 | 1.6433 |
| 4/17/2019 17:31 | 3.8    |        | 7.3477 | 3.175  | 2.6426 | 2.2083 | 0.1756 | 1.6835 |
| 4/17/2019 17:32 | 3.8    | 4.1833 | 7.6473 | 3.575  | 2.6104 | 2.2    | 0.163  | 1.703  |
| 4/17/2019 17:33 | 3.9167 | 3.4667 | 7.9042 | 3.1667 | 2.604  | 2.2    | 0.1626 | 1.7003 |
| 4/17/2019 17:34 | 4.075  | 4.6333 | 7.9133 | 3.825  | 2.5953 | 2.2    | 0.1694 | 1.6673 |
| 4/17/2019 17:35 | 4.1    | 4.7667 | 8.0473 | 3.55   | 2.5393 | 2.1667 | 0.1597 | 1.6523 |
| 4/17/2019 17:36 | 4.05   |        | 7.5587 | 3.3    | 2.5438 | 2.1583 | 0.1691 | 1.6864 |
| 4/17/2019 17:37 | 3.9833 | 3.9667 | 7.6017 | 3.2917 | 2.5278 | 2.1    | 0.1715 | 1.7018 |
| 4/17/2019 17:38 | 3.9667 | 3.95   | 7.8042 | 3.5417 | 2.531  | 2.1    | 0.1631 | 1.6941 |
| 4/17/2019 17:39 | 3.9833 | 3.0167 | 7.4573 | 3.7333 | 2.5347 | 2.1    | 0.1764 | 1.7033 |
| 4/17/2019 17:40 | 3.8917 | 3.7    | 7.279  | 3.3667 | 2.5281 | 2.1    | 0.1554 | 1.7294 |
| 4/17/2019 17:41 | 3.6417 | 3.2    | 7.1438 | 2.4667 | 2.5268 | 2.2    | 0.1687 | 1.7535 |
| 4/17/2019 17:42 | 3.5667 |        | 7.4578 | 3.275  | 2.5085 | 2.2    | 0.17   | 1.7093 |
| 4/17/2019 17:43 | 3.5    |        | 7.5307 | 3.0833 | 2.5278 | 2.2    | 0.1606 | 1.693  |
| 4/17/2019 17:44 | 3.5    |        | 7.349  | 3.2583 | 2.5325 | 2.2    | 0.1756 | 1.6959 |

|                 |        |        |        |        |        |        |        |        |
|-----------------|--------|--------|--------|--------|--------|--------|--------|--------|
| 4/17/2019 17:45 | 3.425  |        | 7.317  | 2.8583 | 2.5268 | 2.2    | 0.1587 | 1.7015 |
| 4/17/2019 17:46 | 3.4083 |        | 7.6278 | 3.325  | 2.5388 | 2.24   | 0.1702 | 1.6971 |
| 4/17/2019 17:47 | 3.375  |        | 7.0363 | 2.975  | 2.5165 | 2.3    | 0.1672 | 1.7211 |
| 4/17/2019 17:48 | 3.3333 |        | 6.9405 | 2.9    | 2.5212 | 2.3    | 0.1622 | 1.7332 |
| 4/17/2019 17:49 | 2.9833 |        | 6.766  | 2.4833 | 2.5039 | 2.3364 | 0.1795 | 1.7495 |
| 4/17/2019 17:50 | 2.8    |        | 6.7328 | 2.3833 | 2.5032 | 2.3727 | 0.1598 | 1.7558 |
| 4/17/2019 17:51 | 2.575  |        | 6.6937 | 2.6417 | 2.4808 | 2.4    | 0.1747 | 1.7353 |
| 4/17/2019 17:52 | 2.6    |        | 7.004  | 2.3083 | 2.4857 | 2.4    | 0.1631 | 1.7299 |
| 4/17/2019 17:53 | 2.6    |        | 6.634  | 1.9917 | 2.4818 | 2.4    | 0.1662 | 1.7473 |
| 4/17/2019 17:54 | 2.6917 |        | 6.6595 | 2.2583 | 2.4857 | 2.4    | 0.1755 | 1.7407 |
| 4/17/2019 17:55 | 2.7    |        | 6.7942 | 1.7083 | 2.491  | 2.4    | 0.1597 | 1.7403 |
| 4/17/2019 17:56 | 2.675  |        | 6.459  | 2.5167 | 2.4771 | 2.4    | 0.1713 | 1.7296 |
| 4/17/2019 17:57 | 2.65   |        | 6.832  | 2.1167 | 2.4729 | 2.4    | 0.1712 | 1.7293 |
| 4/17/2019 17:58 | 2.6    |        | 6.9353 | 2.4    | 2.4813 | 2.4    | 0.1634 | 1.7343 |
| 4/17/2019 17:59 | 2.6    |        | 6.7025 | 2.3583 | 2.4883 | 2.4083 | 0.1756 | 1.7195 |
| 4/17/2019 18:00 | 2.6    | 4.2417 | 6.8027 | 2.4333 | 2.4688 | 2.5    | 0.1592 | 1.7287 |
| 4/17/2019 18:01 | 2.6    | 3.9917 | 6.8843 | 2.6    | 2.4273 | 2.5    | 0.1744 | 1.7302 |
| 4/17/2019 18:02 | 2.6    | 6.7667 | 6.1585 | 1.8417 | 2.4608 | 2.5    | 0.1653 | 1.6831 |
| 4/17/2019 18:03 | 2.6167 | 8.7833 | 6.7287 | 1.8667 | 2.4464 | 2.5    | 0.1689 | 1.7022 |
| 4/17/2019 18:04 | 2.675  | 4.2714 | 6.5515 | 2.325  | 2.4723 | 2.53   | 0.1784 | 1.7173 |
| 4/17/2019 18:05 | 2.7    | 4.2429 | 6.7503 | 2.1333 | 2.4431 | 2.5    | 0.161  | 1.7317 |
| 4/17/2019 18:06 | 2.7167 | 2.3625 | 6.5588 | 2.3    | 2.4328 | 2.525  | 0.1767 | 1.7064 |
| 4/17/2019 18:07 | 2.7    | 2.1909 | 6.3858 | 2.7    | 2.4195 | 2.5    | 0.1626 | 1.6948 |
| 4/17/2019 18:08 | 2.725  | 2.9167 | 6.6267 | 1.9083 | 2.4043 | 2.5    | 0.1691 | 1.6994 |
| 4/17/2019 18:09 | 2.6917 | 1.9083 | 6.4167 | 2.0917 | 2.4034 | 2.5    | 0.1787 | 1.7345 |
| 4/17/2019 18:10 | 2.6583 | 1.8667 | 6.6227 | 2.95   | 2.4012 | 2.5    | 0.1622 | 1.7336 |
| 4/17/2019 18:11 | 2.5167 | 2.0917 | 6.4592 | 2.0333 | 2.4415 | 2.5    | 0.1857 | 1.7283 |
| 4/17/2019 18:12 | 2.4417 | 1.425  | 6.2627 | 2.3833 | 2.4314 | 2.5    | 0.1688 | 1.735  |
| 4/17/2019 18:13 | 2.3417 | 1.975  | 6.3645 | 2.3333 | 2.4233 | 2.5    | 0.1712 | 1.7501 |
| 4/17/2019 18:14 | 2.3333 | 2.375  | 6.2097 | 2.4583 | 2.4187 | 2.5    | 0.1754 | 1.7573 |
| 4/17/2019 18:15 | 2.325  | 2.0583 | 6.215  | 2.5583 | 2.4086 | 2.5    | 0.168  | 1.778  |
| 4/17/2019 18:16 | 2.4    | 2.0833 | 6.2863 | 2.0083 | 2.4332 | 2.5    | 0.179  | 1.7641 |
| 4/17/2019 18:17 | 2.4167 | 2.3333 | 6.3512 | 2.375  | 2.4106 | 2.5182 | 0.1662 | 1.7618 |
| 4/17/2019 18:18 | 2.4    | 1.6167 | 6.3897 | 1.9333 | 2.4155 | 2.5667 | 0.1806 | 1.7551 |
| 4/17/2019 18:19 | 2.375  | 1.9667 | 6.2193 | 1.625  | 2.3967 | 2.6    | 0.1741 | 1.7465 |
| 4/17/2019 18:20 | 2.25   | 1.9833 | 6.091  | 1.6333 | 2.4423 | 2.6    | 0.1709 | 1.7315 |
| 4/17/2019 18:21 | 2.175  | 2.575  | 6.3145 | 1.35   | 2.4451 | 2.7    | 0.1783 | 1.7786 |
| 4/17/2019 18:22 | 2.0583 | 1.7583 | 6.3995 | 1.775  | 2.4429 | 2.7    | 0.1637 | 1.7768 |
| 4/17/2019 18:23 | 2      | 1.9583 | 6.346  | 1.7    | 2.4114 | 2.7    | 0.1751 | 1.7901 |
| 4/17/2019 18:24 | 2      | 1.9667 | 6.4408 | 1.85   | 2.4328 | 2.7    | 0.1689 | 1.7704 |
| 4/17/2019 18:25 | 2      | 1.6    | 6.4683 | 1.15   | 2.4551 | 2.7    | 0.1764 | 1.7216 |
| 4/17/2019 18:26 | 1.975  | 1.4083 | 6.532  | 1.8333 | 2.4428 | 2.7    | 0.1806 | 1.7033 |
| 4/17/2019 18:27 | 1.9833 | 1.6417 | 6.5222 | 1.75   | 2.4567 | 2.7    | 0.1686 | 1.7253 |
| 4/17/2019 18:28 | 2      | 1.2    | 6.399  | 1.9417 | 2.4751 | 2.7333 | 0.1761 | 1.7153 |
| 4/17/2019 18:29 | 2.075  | 1.9083 | 6.2978 | 1.3333 | 2.4513 | 2.8    | 0.1731 | 1.7113 |
| 4/17/2019 18:30 | 2.025  | 2.5583 | 6.1887 | 1.5167 | 2.4372 | 2.8    | 0.1766 | 1.7476 |
| 4/17/2019 18:31 | 2      | 1.5333 | 6.4235 | 1.7917 | 2.4265 | 2.7273 | 0.1809 | 1.7671 |

|                 |        |        |        |        |        |        |        |        |
|-----------------|--------|--------|--------|--------|--------|--------|--------|--------|
| 4/17/2019 18:32 | 1.9167 | 1.0417 | 6.6285 | 1.9083 | 2.4265 | 2.7    | 0.164  | 1.7428 |
| 4/17/2019 18:33 | 1.9917 | 1.2917 | 6.2497 | 1.6833 | 2.4174 | 2.7    | 0.1777 | 1.7568 |
| 4/17/2019 18:34 | 2      | 2.0333 | 6.2695 | 1.5667 | 2.412  | 2.7    | 0.1707 | 1.7352 |
| 4/17/2019 18:35 | 1.9667 | 1.6667 | 6.2233 | 1.8333 | 2.4109 | 2.7    | 0.1718 | 1.778  |
| 4/17/2019 18:36 | 1.9    | 1.1917 | 6.645  | 1.475  | 2.3755 | 2.67   | 0.1765 | 1.7335 |
| 4/17/2019 18:37 | 1.9    | 1.0833 | 6.3323 | 1.625  | 2.387  | 2.7    | 0.1672 | 1.7094 |
| 4/17/2019 18:38 | 1.9    | 1.8167 | 6.297  | 1.7333 | 2.3927 | 2.7    | 0.1784 | 1.6768 |
| 4/17/2019 18:39 | 1.9333 | 1.9917 | 6.423  | 1.5833 | 2.3826 | 2.7    | 0.1645 | 1.7173 |
| 4/17/2019 18:40 | 1.9667 | 1.6583 | 6.5153 | 1.9    | 2.3773 | 2.6364 | 0.1666 | 1.7063 |
| 4/17/2019 18:41 | 1.9    | 1.9667 | 6.332  | 1.5417 | 2.3889 | 2.6    | 0.1787 | 1.6953 |
| 4/17/2019 18:42 | 1.8583 | 1.55   | 6.45   | 1.8333 | 2.3935 | 2.6    | 0.1663 | 1.689  |
| 4/17/2019 18:43 | 1.8083 | 2.1    | 6.6807 | 1.6167 | 2.4043 | 2.6    | 0.1774 | 1.6964 |
| 4/17/2019 18:44 | 1.85   | 1.875  | 6.5538 | 1.4583 | 2.3943 | 2.6    | 0.1659 | 1.7249 |
| 4/17/2019 18:45 | 1.8917 | 1.8333 | 6.5393 | 1.8417 | 2.3874 | 2.6    | 0.178  | 1.6956 |
| 4/17/2019 18:46 | 1.8667 | 1.0833 | 6.3247 | 1.1083 | 2.4068 | 2.6    | 0.181  | 1.7146 |
| 4/17/2019 18:47 | 1.8    | 1.875  | 6.1733 | 1.3917 | 2.375  | 2.6083 | 0.1662 | 1.7093 |
| 4/17/2019 18:48 | 1.8    | 1.55   | 6.506  | 1.5417 | 2.3819 | 2.7    | 0.1772 | 1.7244 |
| 4/17/2019 18:49 | 1.8    | 1.425  | 6.485  | 1.65   | 2.3741 | 2.7    | 0.1677 | 1.7505 |
| 4/17/2019 18:50 | 1.8    | 1.5667 | 6.5333 | 1.1083 | 2.3683 | 2.7    | 0.1733 | 1.7449 |
| 4/17/2019 18:51 | 1.8083 | 1.55   | 6.2433 | 1.525  | 2.3794 | 2.7    | 0.1729 | 1.7222 |
| 4/17/2019 18:52 | 1.8667 | 1.3417 | 6.6482 | 1.5917 | 2.3671 | 2.75   | 0.1737 | 1.7144 |
| 4/17/2019 18:53 | 1.8917 | 1.3417 | 6.5915 | 1.5583 | 2.3807 | 2.8    | 0.1766 | 1.7338 |
| 4/17/2019 18:54 | 1.9    | 1.1167 | 6.8288 | 1.525  | 2.3585 | 2.8    | 0.166  | 1.7182 |
| 4/17/2019 18:55 | 1.85   | 1.775  | 6.2422 | 1.6583 | 2.3616 | 2.8    | 0.177  | 1.7069 |
| 4/17/2019 18:56 | 1.8    | 1.9917 | 6.2307 | 2.0583 | 2.369  | 2.8    | 0.1663 | 1.7202 |
| 4/17/2019 18:57 | 1.775  | 1.7083 | 6.4202 | 1.275  | 2.3574 | 2.8    | 0.1636 | 1.7163 |
| 4/17/2019 18:58 | 1.8    | 1.6167 | 6.3423 | 1.4917 | 2.377  | 2.7091 | 0.1732 | 1.7012 |
| 4/17/2019 18:59 | 1.8    | 1.6583 | 6.4162 | 1.9583 | 2.3468 | 2.7    | 0.1585 | 1.713  |
| 4/17/2019 19:00 | 1.775  | 2.025  | 6.5571 | 1.5333 | 2.363  | 2.7    | 0.175  | 1.7024 |
| 4/17/2019 19:01 | 1.7    | 1.525  | 6.2023 | 1.6583 | 2.3553 | 2.7    | 0.1648 | 1.7048 |
| 4/17/2019 19:02 | 1.7    | 1.5667 | 6.5132 | 2.4    | 2.3564 | 2.7    | 0.1635 | 1.7273 |
| 4/17/2019 19:03 | 1.775  | 1.6333 | 6.4763 | 1.9167 | 2.3468 | 2.7    | 0.1744 | 1.6978 |
| 4/17/2019 19:04 | 1.8    | 1.6833 | 6.3536 | 1.5333 | 2.3446 | 2.7    | 0.1556 | 1.7121 |
| 4/17/2019 19:05 | 1.8    | 1.6167 | 6.5599 | 1.5667 | 2.3464 | 2.6167 | 0.1711 | 1.7123 |
| 4/17/2019 19:06 | 1.725  | 1.1833 | 6.414  | 1.3333 | 2.3254 | 2.6    | 0.1632 | 1.7015 |
| 4/17/2019 19:07 | 1.7    | 1.5833 | 6.3029 | 1.15   | 2.3353 | 2.6    | 0.1628 | 1.6866 |
| 4/17/2019 19:08 | 1.6364 | 1.3833 | 6.2945 | 1.1083 | 2.3388 | 2.6    | 0.1662 | 1.7028 |
| 4/17/2019 19:09 | 1.6083 | 1.9167 | 6.3241 | 1.0917 | 2.3181 | 2.6    | 0.1507 | 1.7243 |
| 4/17/2019 19:10 | 1.6083 | 1.3833 | 6.2808 | 1.2167 | 2.3264 | 2.6909 | 0.1695 | 1.7634 |
| 4/17/2019 19:11 | 1.6    | 1.5    | 6.6071 | 0.9833 | 2.3335 | 2.7    | 0.1557 | 1.7767 |
| 4/17/2019 19:12 | 1.6    | 0.9417 | 6.5385 | 0.8667 | 2.3213 | 2.7    | 0.1562 | 1.7292 |
| 4/17/2019 19:13 | 1.5333 | 0.8167 | 6.2906 | 1.6083 | 2.3111 | 2.7    | 0.1631 | 1.7138 |
| 4/17/2019 19:14 | 1.5    | 2      | 6.4079 | 1.15   | 2.3083 | 2.7    | 0.1518 | 1.7163 |
| 4/17/2019 19:15 | 1.5667 | 1.7583 | 6.5267 | 1.55   | 2.3134 | 2.7    | 0.155  | 1.7298 |
| 4/17/2019 19:16 | 1.65   | 1.4833 | 6.4457 | 1.5    | 2.3173 | 2.7    | 0.1616 | 1.7462 |
| 4/17/2019 19:17 | 1.7083 | 1.675  | 6.4889 | 1.4917 | 2.3135 | 2.75   | 0.1521 | 1.7606 |
| 4/17/2019 19:18 | 1.7917 | 1.25   | 6.4227 | 1.5083 | 2.2964 | 2.8    | 0.1544 | 1.7739 |



|                 |        |        |        |        |        |        |        |        |
|-----------------|--------|--------|--------|--------|--------|--------|--------|--------|
| 4/17/2019 19:19 | 1.8    | 1.3417 | 6.1578 | 1.4    | 2.2928 | 2.8    | 0.1437 | 1.7686 |
| 4/17/2019 19:20 | 1.8    | 1.5917 | 6.2418 | 1.2167 | 2.2901 | 2.8    | 0.1525 | 1.7468 |
| 4/17/2019 19:21 | 1.725  | 2      | 6.0335 | 0.5667 | 2.2818 | 2.8    | 0.1537 | 1.7483 |
| 4/17/2019 19:22 | 1.7    | 1.55   | 6.5311 | 1.5583 | 2.281  | 2.8    | 0.143  | 1.7542 |
| 4/17/2019 19:23 | 1.7    | 1.2417 | 6.2904 | 1.125  | 2.2948 | 2.8    | 0.161  | 1.7528 |
| 4/17/2019 19:24 | 1.7    | 1.3833 | 6.2759 | 2.2417 | 2.2736 | 2.8    | 0.1488 | 1.7468 |
| 4/17/2019 19:25 | 1.7    | 1.5583 | 6.4731 | 2.2917 | 2.2748 | 2.8    | 0.1483 | 1.7589 |
| 4/17/2019 19:26 | 1.6917 | 1.2    | 6.4615 | 1.4333 | 2.2908 | 2.8    | 0.1581 | 1.7725 |
| 4/17/2019 19:27 | 1.6833 | 1.1167 | 6.6675 | 1.6    | 2.2755 | 2.8    | 0.1479 | 1.7696 |
| 4/17/2019 19:28 | 1.7    | 0.975  | 6.2993 | 1.375  | 2.3013 | 2.8    | 0.1609 | 1.7046 |
| 4/17/2019 19:29 | 1.7    | 0.9083 | 6.3889 | 0.8917 | 2.298  | 2.8    | 0.1512 | 1.7183 |
| 4/17/2019 19:30 | 1.625  | 0.975  | 6.4156 | 0.8083 | 2.2785 | 2.8    | 0.1486 | 1.7408 |
| 4/17/2019 19:31 | 1.625  | 1.525  | 6.0474 | 1.6083 | 2.2979 | 2.8    | 0.1557 | 1.7398 |
| 4/17/2019 19:32 | 1.6917 | 1.1667 | 6.2368 | 1.3083 | 2.3104 | 2.8    | 0.1426 | 1.6964 |
| 4/17/2019 19:33 | 1.6333 | 1.075  | 6.25   | 0.8917 | 2.3182 | 2.8    | 0.1535 | 1.7143 |
| 4/17/2019 19:34 | 1.6167 | 1.6667 | 6.3854 | 1.4167 | 2.3088 | 2.8    | 0.1495 | 1.6961 |
| 4/17/2019 19:35 | 1.575  | 1.325  | 6.2812 | 1.05   | 2.312  | 2.9    | 0.1395 | 1.7305 |
| 4/17/2019 19:36 | 1.5083 | 1.5583 | 6.3743 | 0.5333 | 2.3111 | 2.9    | 0.1575 | 1.7201 |
| 4/17/2019 19:37 | 1.5667 | 1.525  | 6.3364 | 1.1667 | 2.2496 | 2.9    | 0.1487 | 1.7346 |
| 4/17/2019 19:38 | 1.6    | 1.8083 | 6.551  | 1.2417 | 2.2282 | 2.9    | 0.15   | 1.7436 |
| 4/17/2019 19:39 | 1.6    | 1.2417 | 6.4568 | 1.05   | 2.2175 | 2.8727 | 0.1572 | 1.7213 |
| 4/17/2019 19:40 | 1.6083 | 1.9917 | 6.2973 | 1.325  | 2.2355 | 2.8    | 0.1427 | 1.7049 |
| 4/17/2019 19:41 | 1.6    | 1.8167 | 6.5956 | 1.5    | 2.2242 | 2.8    | 0.1544 | 1.6881 |
| 4/17/2019 19:42 | 1.6    | 0.775  | 6.5203 | 1.025  | 2.2175 | 2.7455 | 0.1483 | 1.6628 |
| 4/17/2019 19:43 | 1.6    | 1.1167 | 6.4095 | 1.15   | 2.2136 | 2.75   | 0.1474 | 1.6816 |
| 4/17/2019 19:44 | 1.6    | 0.875  | 6.6548 | 1.25   | 2.2149 | 2.7    | 0.1563 | 1.7068 |
| 4/17/2019 19:45 | 1.5833 | 1.375  | 6.521  | 1.725  | 2.2343 | 2.7    | 0.1439 | 1.7231 |
| 4/17/2019 19:46 | 1.6    | 0.625  | 6.498  | 1.4083 | 2.2175 | 2.7    | 0.1522 | 1.7267 |
| 4/17/2019 19:47 | 1.6    | 0.5083 | 6.2868 | 1.3417 | 2.2114 | 2.7    | 0.1593 | 1.7063 |
| 4/17/2019 19:48 | 1.5667 | 1.125  | 6.4094 | 1.3333 | 2.2033 | 2.7    | 0.1427 | 1.7125 |
| 4/17/2019 19:49 | 1.525  | 1.4333 | 6.8118 | 1.5167 | 2.2165 | 2.7    | 0.1587 | 1.6779 |
| 4/17/2019 19:50 | 1.5    | 0.875  | 6.4552 | 1.4917 | 2.2105 | 2.7    | 0.1453 | 1.6772 |
| 4/17/2019 19:51 | 1.5417 | 1.2917 | 6.4003 | 1.375  | 2.217  | 2.7    | 0.1564 | 1.6558 |
| 4/17/2019 19:52 | 1.6333 | 1      | 6.2108 | 1.3417 | 2.2144 | 2.7    | 0.1543 | 1.6733 |
| 4/17/2019 19:53 | 1.7    | 1.0083 | 6.5481 | 1.1583 | 2.2168 | 2.7    | 0.148  | 1.684  |
| 4/17/2019 19:54 | 1.7    | 1.4333 | 6.2384 | 1.2917 | 2.2293 | 2.7    | 0.1568 | 1.6843 |
| 4/17/2019 19:55 | 1.65   | 1.325  | 6.0441 | 1.2833 | 2.2151 | 2.7    | 0.1483 | 1.7108 |
| 4/17/2019 19:56 | 1.5917 | 1.2667 | 6.3551 | 1.375  | 2.2313 | 2.7455 | 0.1553 | 1.6963 |
| 4/17/2019 19:57 | 1.5917 | 1.5917 | 6.6144 | 1.0667 | 2.215  | 2.7455 | 0.1562 | 1.7074 |
| 4/17/2019 19:58 | 1.6    | 1.3583 | 6.2196 | 0.9167 | 2.2268 | 2.7    | 0.1479 | 1.7078 |
| 4/17/2019 19:59 | 1.6083 | 1.5333 | 6.4271 | 1.5333 | 2.2336 | 2.7    | 0.1638 | 1.7081 |
| 4/17/2019 20:00 | 1.6667 | 1.425  | 6.4796 | 1.3    | 2.2355 | 2.7    | 0.1549 | 1.7099 |
| 4/17/2019 20:01 | 1.6667 | 1.2667 | 6.2377 | 1.1833 | 2.2293 | 2.7    | 0.1622 | 1.7171 |
| 4/17/2019 20:02 | 1.6583 | 0.7    | 6.7284 | 0.9167 | 2.2196 | 2.7    | 0.1608 | 1.6672 |
| 4/17/2019 20:03 | 1.6    | 1.25   | 6.2863 | 1.375  | 2.215  | 2.7583 | 0.1473 | 1.7006 |
| 4/17/2019 20:04 | 1.5917 | 1.0667 | 6.6723 | 1.125  | 2.2317 | 2.7    | 0.1637 | 1.7088 |
| 4/17/2019 20:05 | 1.5417 | 1.425  | 6.4903 | 0.8417 | 2.2278 | 2.7909 | 0.1548 | 1.7355 |

|                 |        |        |        |        |        |        |        |        |
|-----------------|--------|--------|--------|--------|--------|--------|--------|--------|
| 4/17/2019 20:06 | 1.6    | 1.8    | 6.2484 | 1.2    | 2.2153 | 2.8    | 0.1606 | 1.7581 |
| 4/17/2019 20:07 | 1.625  | 1.7333 | 6.1936 | 0.8333 | 2.2309 | 2.8    | 0.16   | 1.7627 |
| 4/17/2019 20:08 | 1.7    | 1.9    | 6.536  | 1.4833 | 2.2193 | 2.8    | 0.1494 | 1.7647 |
| 4/17/2019 20:09 | 1.7    | 1.9667 | 6.404  | 1.375  | 2.2241 | 2.85   | 0.169  | 1.7691 |
| 4/17/2019 20:10 | 1.7083 | 1.5167 | 6.2123 | 1.3083 | 2.2148 | 2.9    | 0.1603 | 1.7566 |
| 4/17/2019 20:11 | 1.8    | 1.3667 | 6.1384 | 1.55   | 2.2333 | 2.9    | 0.1576 | 1.7379 |
| 4/17/2019 20:12 | 1.8833 | 2.0417 | 6.469  | 1.3    | 2.2487 | 2.8545 | 0.1675 | 1.7523 |
| 4/17/2019 20:13 | 1.9417 | 1.1333 | 6.3769 | 1.6417 | 2.2296 | 2.8273 | 0.1487 | 1.743  |
| 4/17/2019 20:14 | 2      | 1.9833 | 6.2568 | 1.6    | 2.2393 | 2.9    | 0.165  | 1.7342 |
| 4/17/2019 20:15 | 1.9833 | 1.4333 | 6.2758 | 1.4    | 2.2369 | 2.8083 | 0.1612 | 1.7185 |
| 4/17/2019 20:16 | 1.9667 | 2.1583 | 6.4202 | 1.3833 | 2.2342 | 2.8    | 0.1593 | 1.7222 |
| 4/17/2019 20:17 | 1.9    | 2.0917 | 6.4037 | 1.475  | 2.2459 | 2.8    | 0.1694 | 1.7358 |
| 4/17/2019 20:18 | 1.875  | 1.525  | 6.2088 | 0.8333 | 2.2228 | 2.8    | 0.1528 | 1.7671 |
| 4/17/2019 20:19 | 1.8583 | 1.425  | 6.2366 | 1.7333 | 2.2236 | 2.8    | 0.1609 | 1.7458 |
| 4/17/2019 20:20 | 1.9083 | 1.6917 | 6.4996 | 1.9    | 2.2129 | 2.76   | 0.1556 | 1.7208 |
| 4/17/2019 20:21 | 1.9    | 1.6583 | 6.5283 | 1.55   | 2.2251 | 2.7    | 0.1604 | 1.7208 |
| 4/17/2019 20:22 | 1.8583 | 1.375  | 6.4351 | 1.425  | 2.2169 | 2.7    | 0.1643 | 1.7305 |
| 4/17/2019 20:23 | 1.8    | 1.3917 | 6.0613 | 1.3167 | 2.2371 | 2.7    | 0.1479 | 1.7574 |
| 4/17/2019 20:24 | 1.8    | 1.2833 | 6.3497 | 2      | 2.2243 | 2.7    | 0.1699 | 1.7664 |
| 4/17/2019 20:25 | 1.8    | 1.5083 | 6.3451 | 1.2    | 2.2055 | 2.6333 | 0.1605 | 1.7619 |
| 4/17/2019 20:26 | 1.8917 | 1.7    | 6.4507 | 2.0917 | 2.2318 | 2.6    | 0.1556 | 1.7584 |
| 4/17/2019 20:27 | 1.9    | 1.5333 | 6.2662 | 1.825  | 2.2079 | 2.6    | 0.1664 | 1.7666 |
| 4/17/2019 20:28 | 1.9    | 1.6583 | 6.1524 | 0.8583 | 2.2294 | 2.6    | 0.1543 | 1.7465 |
| 4/17/2019 20:29 | 1.8333 | 1.0917 | 6.2064 | 1.1    | 2.2274 | 2.6909 | 0.1633 | 1.7577 |
| 4/17/2019 20:30 | 1.825  | 1.2667 | 6.2089 | 1.6917 | 2.225  | 2.7    | 0.154  | 1.7678 |
| 4/17/2019 20:31 | 1.8    | 1.525  | 6.0132 | 1.8917 | 2.214  | 2.7    | 0.1537 | 1.7482 |
| 4/17/2019 20:32 | 1.7333 | 1.0667 | 6.2245 | 1.2    | 2.2177 | 2.6583 | 0.1647 | 1.7525 |
| 4/17/2019 20:33 | 1.8    | 1.2    | 6.3985 | 0.775  | 2.2055 | 2.6    | 0.1552 | 1.7468 |
| 4/17/2019 20:34 | 1.8167 | 1.725  | 6.3398 | 1.4583 | 2.2013 | 2.6636 | 0.1603 | 1.7479 |
| 4/17/2019 20:35 | 1.9583 | 1.7583 | 6.192  | 2.2833 | 2.2118 | 2.65   | 0.1542 | 1.7298 |
| 4/17/2019 20:36 | 2.0083 | 1.675  | 6.5503 | 1.775  | 2.225  | 2.7    | 0.1541 | 1.7316 |
| 4/17/2019 20:37 | 2.0083 | 0.875  | 6.8952 | 1.2333 | 2.225  | 2.7    | 0.1648 | 1.7915 |
| 4/17/2019 20:38 | 1.9    | 1.375  | 5.8642 | 1.6333 | 2.1767 | 2.7    | 0.1492 | 1.8169 |
| 4/17/2019 20:39 | 1.8333 | 1.6667 | 6.0055 | 1.4917 | 2.1564 | 2.7    | 0.1593 | 1.7529 |
| 4/17/2019 20:40 | 1.875  | 1.6333 | 5.9962 | 2.0667 | 2.1807 | 2.7    | 0.1524 | 1.7365 |
| 4/17/2019 20:41 | 2      | 1.2917 | 6.1598 | 1.875  | 2.1664 | 2.7    | 0.165  | 1.7187 |
| 4/17/2019 20:42 | 2      | 1.7083 | 6.2013 | 1.4333 | 2.161  | 2.7    | 0.1665 | 1.7197 |
| 4/17/2019 20:43 | 1.9667 | 1.55   | 6.0948 | 1.9083 | 2.1808 | 2.7    | 0.1512 | 1.6997 |
| 4/17/2019 20:44 | 1.8917 | 1.9833 | 6.0648 | 1.3833 | 2.1617 | 2.7    | 0.1659 | 1.7105 |
| 4/17/2019 20:45 | 1.8    | 1.8583 | 6.67   | 1.2917 | 2.1674 | 2.7455 | 0.1484 | 1.7113 |
| 4/17/2019 20:46 | 1.8    | 2.1833 | 6.1607 | 1.25   | 2.1759 | 2.8    | 0.1618 | 1.7244 |
| 4/17/2019 20:47 | 1.8    | 1.3583 | 6.2838 | 1.575  | 2.1953 | 2.8    | 0.1646 | 1.7202 |
| 4/17/2019 20:48 | 1.7833 | 1.0167 | 6.3695 | 1.9917 | 2.1688 | 2.8    | 0.1567 | 1.7212 |
| 4/17/2019 20:49 | 1.7    | 1.1083 | 6.3082 | 1.6333 | 2.1881 | 2.8    | 0.1649 | 1.7678 |
| 4/17/2019 20:50 | 1.6833 | 1.625  | 6.1815 | 1.6167 | 2.1975 | 2.8    | 0.1483 | 1.7609 |
| 4/17/2019 20:51 | 1.6833 | 1.3    | 6.0317 | 0.9917 | 2.1839 | 2.8    | 0.1682 | 1.7783 |
| 4/17/2019 20:52 | 1.7    | 1.4083 | 5.9173 | 1.5    | 2.1878 | 2.8    | 0.1599 | 1.7846 |

|                 |        |        |        |        |        |        |        |        |
|-----------------|--------|--------|--------|--------|--------|--------|--------|--------|
| 4/17/2019 20:53 | 1.7    | 1.0917 | 6.2068 | 1.5333 | 2.1752 | 2.8    | 0.1623 | 1.7522 |
| 4/17/2019 20:54 | 1.7167 | 1.2667 | 5.823  | 1.2417 | 2.2022 | 2.8    | 0.1636 | 1.7396 |
| 4/17/2019 20:55 | 1.8    | 1.2583 | 6.0307 | 1.8333 | 2.1947 | 2.8    | 0.1481 | 1.7693 |
| 4/17/2019 20:56 | 1.8    | 1.2083 | 5.9373 | 1.45   | 2.2108 | 2.8    | 0.1675 | 1.7585 |
| 4/17/2019 20:57 | 1.8    | 1.6667 | 5.9523 | 1.4167 | 2.2182 | 2.8    | 0.1569 | 1.7263 |
| 4/17/2019 20:58 | 1.8    | 1.5917 | 6.01   | 0.8417 | 2.2148 | 2.8    | 0.1606 | 1.7342 |
| 4/17/2019 20:59 | 1.7333 | 1.0167 | 6.1057 | 1.3    | 2.2287 | 2.8    | 0.1671 | 1.7269 |
| 4/17/2019 21:00 | 1.6    | 0.9917 | 5.8445 | 1.1667 | 2.194  | 2.8    | 0.1578 | 1.7771 |
| 4/17/2019 21:01 | 1.625  | 1.4583 | 6.1688 | 1.0083 | 2.2429 | 2.8417 | 0.1675 | 1.7634 |
| 4/17/2019 21:02 | 1.6417 | 1.1167 | 5.8535 | 0.8583 | 2.2473 | 2.9    | 0.1524 | 1.7493 |
| 4/17/2019 21:03 | 1.65   | 0.925  | 5.834  | 1.0833 | 2.2482 | 2.9    | 0.161  | 1.7658 |
| 4/17/2019 21:04 | 1.6    | 1.0333 | 5.8755 | 1.4583 | 2.2543 | 2.9    | 0.1649 | 1.7406 |
| 4/17/2019 21:05 | 1.7    | 1.275  | 5.7362 | 0.7083 | 2.3082 | 2.9    | 0.15   | 1.7473 |
| 4/17/2019 21:06 | 1.75   | 1.95   | 6.3232 | 1.95   | 2.3269 | 2.9    | 0.1679 | 1.7185 |
| 4/17/2019 21:07 | 1.775  | 1.0667 | 6.2178 | 1.3    | 2.2843 | 2.8083 | 0.1572 | 1.711  |
| 4/17/2019 21:08 | 1.7667 | 1.2417 | 6.0817 | 0.825  | 2.3283 | 2.8    | 0.1619 | 1.7208 |
| 4/17/2019 21:09 | 1.675  | 1.6    | 6.0558 | 0.6917 | 2.2599 | 2.8    | 0.1659 | 1.7663 |
| 4/17/2019 21:10 | 1.6    | 1.7167 | 6.0098 | 1.4167 | 2.2566 | 2.8    | 0.1488 | 1.7957 |
| 4/17/2019 21:11 | 1.6    | 1.3417 | 6.0857 | 1.5917 | 2.2685 | 2.8    | 0.1648 | 1.804  |
| 4/17/2019 21:12 | 1.6    | 1.15   | 5.8298 | 1.4917 | 2.3336 | 2.8    | 0.1557 | 1.7955 |
| 4/17/2019 21:13 | 1.5917 | 0.6667 | 5.9308 | 1.1917 | 2.3134 | 2.7222 | 0.1654 | 1.7945 |
| 4/17/2019 21:14 | 1.4667 | 1.3583 | 5.7637 | 0.8833 | 2.3147 | 2.7    | 0.1679 | 1.7735 |
| 4/17/2019 21:15 | 1.4083 | 1.425  | 5.6888 | 0.8583 | 2.3712 | 2.7    | 0.1589 | 1.7621 |
| 4/17/2019 21:16 | 1.5    | 1.6667 | 5.9678 | 1.025  | 2.4005 | 2.7    | 0.168  | 1.7983 |
| 4/17/2019 21:17 | 1.5    | 1      | 6.0463 | 0.7417 | 2.3976 | 2.7    | 0.1494 | 1.8016 |
| 4/17/2019 21:18 | 1.5    | 1.4333 | 5.9553 | 0.675  | 2.4046 | 2.7    | 0.1623 | 1.8053 |
| 4/17/2019 21:19 | 1.4    | 1.05   | 5.7512 | 0.6333 | 2.3732 | 2.7273 | 0.1615 | 1.7978 |
| 4/17/2019 21:20 | 1.4    | 0.6417 | 5.7315 | 0.475  | 2.3857 | 2.8    | 0.1662 | 1.792  |
| 4/17/2019 21:21 | 1.4    | 0.4    | 5.7603 | 0.7917 | 2.3685 | 2.8    | 0.1632 | 1.8009 |
| 4/17/2019 21:22 | 1.4    | 0.675  | 5.4568 | 0.8083 | 2.4022 | 2.8    | 0.1469 | 1.8022 |
| 4/17/2019 21:23 | 1.3917 | 1.125  | 5.9835 | 0.9417 | 2.4078 | 2.8    | 0.1655 | 1.8    |
| 4/17/2019 21:24 | 1.3917 | 0.6833 | 5.9128 | 1.2417 | 2.4539 | 2.8    | 0.1545 | 1.7808 |
| 4/17/2019 21:25 | 1.3417 | 0.55   | 5.698  | 0.8167 | 2.4328 | 2.8    | 0.1589 | 1.7841 |
| 4/17/2019 21:26 | 1.3    | 0.9667 | 5.6805 | 1.1083 | 2.4805 | 2.8    | 0.1661 | 1.7796 |
| 4/17/2019 21:27 | 1.2917 | 1.15   | 5.748  | 0.8417 | 2.4407 | 2.8    | 0.1526 | 1.8082 |
| 4/17/2019 21:28 | 1.3    | 0.45   | 5.7148 | 1.05   | 2.4328 | 2.8    | 0.1692 | 1.8468 |
| 4/17/2019 21:29 | 1.3083 | 0.85   | 5.7343 | 1.1667 | 2.4465 | 2.8    | 0.1507 | 1.8199 |
| 4/17/2019 21:30 | 1.3    | 0.775  | 5.52   | 1.05   | 2.4521 | 2.8    | 0.1721 | 1.8004 |
| 4/17/2019 21:31 | 1.3    | 0.7583 | 5.8893 | 1.0333 | 2.495  | 2.8444 | 0.154  | 1.768  |
| 4/17/2019 21:32 | 1.3    | 0.8583 | 5.5887 | 1.3333 | 2.4884 | 2.8273 | 0.1511 | 1.7753 |
| 4/17/2019 21:33 | 1.3    | 0.7083 | 5.9818 | 1.0167 | 2.5398 | 2.88   | 0.1704 | 1.7969 |
| 4/17/2019 21:34 | 1.3    | 0.6583 | 5.6817 | 1.2917 | 2.5437 | 2.8583 | 0.1571 | 1.7851 |
| 4/17/2019 21:35 | 1.2917 | 1.1167 | 5.6317 | 0.7417 | 2.516  | 2.8    | 0.1652 | 1.7915 |
| 4/17/2019 21:36 | 1.3    | 1.025  | 5.7163 | 0.5333 | 2.5266 | 2.8    | 0.1543 | 1.7805 |
| 4/17/2019 21:37 | 1.3    | 1.0917 | 5.7405 | 0.5083 | 2.521  | 2.88   | 0.1648 | 1.7737 |
| 4/17/2019 21:38 | 1.2583 | 1.8167 | 5.6508 | 0.625  | 2.521  | 2.9    | 0.1615 | 1.8115 |
| 4/17/2019 21:39 | 1.2167 | 0.6417 | 5.4507 | 0.7333 | 2.5073 | 2.9    | 0.1591 | 1.7837 |

|                 |        |         |        |        |        |      |        |        |
|-----------------|--------|---------|--------|--------|--------|------|--------|--------|
| 4/17/2019 21:40 | 1.2    | 0.8917  | 5.9872 | 0.825  | 2.5142 | 2.9  | 0.1667 | 1.7799 |
| 4/17/2019 21:41 | 1.2    | -0.0417 | 5.8412 | 0.8667 | 2.522  | 2.9  | 0.1594 | 1.7799 |
| 4/17/2019 21:42 | 1.2    | 1.3     | 5.689  | 0.4333 | 2.5295 | 2.9  | 0.1563 | 1.7726 |
| 4/17/2019 21:43 | 1.2    | 1.4333  | 5.6058 | 0.7417 | 2.5458 | 2.9  | 0.1626 | 1.7648 |
| 4/17/2019 21:44 | 1.2    | 1       | 5.4005 | 0.375  | 2.5698 | 2.9  | 0.1533 | 1.7976 |
| 4/17/2019 21:45 | 1.2    | 0.6167  | 6.0123 | 0.925  | 2.5774 | 2.9  | 0.1631 | 1.8005 |
| 4/17/2019 21:46 | 1.2    | 1.4     | 5.6103 | 0.8917 | 2.5819 | 2.9  | 0.1501 | 1.8158 |
| 4/17/2019 21:47 | 1.2    | 0.9417  | 5.7625 | 0.5917 | 2.6011 | 2.9  | 0.1633 | 1.8228 |
| 4/17/2019 21:48 | 1.2    | 0.6583  | 5.633  | 1.325  | 2.6222 | 2.9  | 0.1534 | 1.8181 |
| 4/17/2019 21:49 | 1.2    | 1.225   | 5.666  | 0.8    | 2.6361 | 2.9  | 0.1549 | 1.7957 |
| 4/17/2019 21:50 | 1.2    | 0.8583  | 5.5558 | 0.4917 | 2.6559 | 2.9  | 0.1684 | 1.7771 |
| 4/17/2019 21:51 | 1.2    | 1.2833  | 5.5008 | 1.7417 | 2.6565 | 2.9  | 0.1488 | 1.7765 |
| 4/17/2019 21:52 | 1.2667 | 0.7917  | 5.3555 | 0.6833 | 2.6612 | 2.9  | 0.163  | 1.7967 |
| 4/17/2019 21:53 | 1.3    | 1.05    | 5.8    | 0.9917 | 2.6611 | 2.9  | 0.1513 | 1.8078 |
| 4/17/2019 21:54 | 1.2917 | 1.1583  | 5.3728 | 0.9583 | 2.6924 | 2.9  | 0.1571 | 1.7974 |
| 4/17/2019 21:55 | 1.2083 | 0.6333  | 5.094  | 1.0333 | 2.6755 | 2.9  | 0.1616 | 1.7928 |
| 4/17/2019 21:56 | 1.1917 | 0.1917  | 5.4975 | 0.6417 | 2.7083 | 2.8  | 0.1464 | 1.7796 |
| 4/17/2019 21:57 | 1.1    | 0.8583  | 5.4088 | 0.7167 | 2.7106 | 2.8  | 0.1648 | 1.7829 |
| 4/17/2019 21:58 | 1.1    | 1.025   | 5.6432 | 0.9833 | 2.7268 | 2.8  | 0.1579 | 1.7843 |
| 4/17/2019 21:59 | 1.1    | 1.275   | 5.5877 | 1.2417 | 2.7268 | 2.8  | 0.1578 | 1.7708 |
| 4/17/2019 22:00 | 1.1    | 1.0167  | 5.334  | 0.9083 | 2.7428 | 2.8  | 0.1575 | 1.7925 |
| 4/17/2019 22:01 | 1.0833 | 1.2     | 5.7193 | 0.9    | 2.7781 | 2.8  | 0.1504 | 1.7913 |
| 4/17/2019 22:02 | 1.0667 | 0.625   | 5.4742 | 0.575  | 2.7772 | 2.8  | 0.1676 | 1.779  |
| 4/17/2019 22:03 | 1.0167 | 0.9667  | 5.5104 | 0.8417 | 2.7851 | 2.8  | 0.1577 | 1.7743 |
| 4/17/2019 22:04 | 1      | 0.9     | 5.4007 | 0.8333 | 2.7843 | 2.8  | 0.1561 | 1.7755 |
| 4/17/2019 22:05 | 1      | 0.425   | 5.3811 | 0.4833 | 2.8133 | 2.75 | 0.1646 | 1.7703 |
| 4/17/2019 22:06 | 1      | 0.575   | 5.399  | 0.8833 | 2.7953 | 2.7  | 0.1555 | 1.7937 |
| 4/17/2019 22:07 | 1      | 1.2917  | 5.3877 | 0.7917 | 2.7914 | 2.7  | 0.1664 | 1.8063 |
| 4/17/2019 22:08 | 0.9667 | 0.8083  | 5.2963 | 1.0917 | 2.8011 | 2.7  | 0.1623 | 1.7981 |
| 4/17/2019 22:09 | 0.9    | 0.6167  | 5.3906 | 0.7667 | 2.7984 | 2.7  | 0.162  | 1.7834 |
| 4/17/2019 22:10 | 0.9    | 0.75    | 5.2918 | 0.875  | 2.813  | 2.7  | 0.1618 | 1.7583 |
| 4/17/2019 22:11 | 0.95   | 0.1     | 5.4208 | 0.6583 | 2.8188 | 2.7  | 0.1545 | 1.7873 |
| 4/17/2019 22:12 | 1      | 0.3917  | 5.4471 | 0.3333 | 2.8178 | 2.7  | 0.1689 | 1.7983 |
| 4/17/2019 22:13 | 0.9667 | 1.1     | 5.2898 | 0.55   | 2.8359 | 2.7  | 0.1552 | 1.7859 |
| 4/17/2019 22:14 | 0.925  | 0.8167  | 5.2897 | 1.0833 | 2.8373 | 2.7  | 0.1629 | 1.7743 |
| 4/17/2019 22:15 | 1      | 1.3667  | 5.3973 | 0.825  | 2.8426 | 2.7  | 0.1575 | 1.7743 |
| 4/17/2019 22:16 | 1.0083 | 0.85    | 5.3743 | 0.35   | 2.8197 | 2.7  | 0.1605 | 1.7681 |
| 4/17/2019 22:17 | 1.1    | -0.4167 | 5.3818 | 0.75   | 2.8392 | 2.8  | 0.1624 | 1.7911 |
| 4/17/2019 22:18 | 1.0167 | 1.2583  | 5.2694 | 0.5583 | 2.8666 | 2.8  | 0.152  | 1.7916 |
| 4/17/2019 22:19 | 1      | 0.175   | 5.2488 | 0.8667 | 2.8511 | 2.8  | 0.1652 | 1.7963 |
| 4/17/2019 22:20 | 1      | 1       | 5.3018 | 0.8167 | 2.854  | 2.8  | 0.1589 | 1.7861 |
| 4/17/2019 22:21 | 1.0167 | 0.3417  | 5.2403 | 0.8583 | 2.8808 | 2.8  | 0.1573 | 1.7671 |
| 4/17/2019 22:22 | 1.1    | 0.5583  | 5.2876 | 0.7583 | 2.8738 | 2.8  | 0.1619 | 1.7573 |
| 4/17/2019 22:23 | 1.1    | 0.8417  | 5.4222 | 0.1083 | 2.9071 | 2.8  | 0.1516 | 1.7915 |
| 4/17/2019 22:24 | 1.1    | 0.525   | 5.3766 | 0.5583 | 2.8942 | 2.9  | 0.1636 | 1.7914 |
| 4/17/2019 22:25 | 1.1    | 1.7917  | 5.3379 | 0.725  | 2.9132 | 2.9  | 0.1591 | 1.7925 |
| 4/17/2019 22:26 | 1.1    | 0.9167  | 5.2043 | 0.5667 | 2.9317 | 2.9  | 0.1608 | 1.7945 |

|                 |        |        |        |        |        |        |        |        |
|-----------------|--------|--------|--------|--------|--------|--------|--------|--------|
| 4/17/2019 22:27 | 1.0917 | 0.3583 | 5.6596 | 0.5    | 2.9334 | 2.875  | 0.1592 | 1.7928 |
| 4/17/2019 22:28 | 1      | 1.0917 | 4.9958 | 0.8833 | 2.9459 | 2.8273 | 0.1519 | 1.8163 |
| 4/17/2019 22:29 | 1      | 0.1417 | 5.3102 | 0.55   | 2.9503 | 2.825  | 0.1701 | 1.8223 |
| 4/17/2019 22:30 | 1.0583 | 0.75   | 5.5677 | 0.7583 | 2.9385 | 2.85   | 0.1477 | 1.8313 |
| 4/17/2019 22:31 | 1.1    | 1.4917 | 5.4286 | 1.025  | 2.9644 | 2.9    | 0.1574 | 1.8255 |
| 4/17/2019 22:32 | 1.0583 | 1.6833 | 5.3993 | 0.4917 | 2.97   | 2.9    | 0.165  | 1.8098 |
| 4/17/2019 22:33 | 1      | 1.0083 | 5.19   | 0.2667 | 2.9801 | 2.9    | 0.1516 | 1.8088 |
| 4/17/2019 22:34 | 1      | 0.3333 | 5.6037 | 0.0083 | 2.958  | 2.9    | 0.162  | 1.8161 |
| 4/17/2019 22:35 | 1.0583 | 0.5667 | 5.7206 | 0.5167 | 3.0149 | 2.9    | 0.1523 | 1.7841 |
| 4/17/2019 22:36 | 1.0583 | 1.0167 | 5.2738 | 0.05   | 3.0053 | 2.9    | 0.1578 | 1.7793 |
| 4/17/2019 22:37 | 1.0583 | 0.975  | 5.1947 | 0.6083 | 3.0034 | 2.9    | 0.1638 | 1.7923 |
| 4/17/2019 22:38 | 1      | 0.45   | 5.2786 | 0.6417 | 3.0053 | 2.9    | 0.1551 | 1.8041 |
| 4/17/2019 22:39 | 1      | 0.4333 | 5.14   | 0.5333 | 3.005  | 2.9    | 0.1692 | 1.7924 |
| 4/17/2019 22:40 | 1      | 0.6    | 5.3709 | 0.1833 | 2.9903 | 2.99   | 0.1477 | 1.7997 |
| 4/17/2019 22:41 | 1      | 1.4917 | 5.0169 | 1.1333 | 2.9647 | 2.9273 | 0.1601 | 1.8101 |
| 4/17/2019 22:42 | 1      | 0.625  | 5.2796 | 0.3    | 2.9616 | 3      | 0.1577 | 1.7991 |
| 4/17/2019 22:43 | 0.9833 | 0.8417 | 4.9836 | 0.3917 | 2.9843 | 3      | 0.1611 | 1.7754 |
| 4/17/2019 22:44 | 0.9083 | 0.2417 | 5.2933 | 0.5083 | 2.9738 | 3      | 0.1724 | 1.7803 |
| 4/17/2019 22:45 | 0.9    | 1.0083 | 5.0735 | 0.55   | 2.9893 | 3      | 0.1457 | 1.7748 |
| 4/17/2019 22:46 | 0.875  | 0.575  | 5.055  | 0.0917 | 3.0358 | 3      | 0.1524 | 1.7878 |
| 4/17/2019 22:47 | 0.9    | 0.75   | 5.1664 |        | 3.0008 | 3      | 0.1571 | 1.7823 |
| 4/17/2019 22:48 | 0.9    | 0.5833 | 4.868  | 0.71   | 3.0148 | 3      | 0.1624 | 1.7999 |
| 4/17/2019 22:49 | 0.8667 | 0.3583 | 5.0405 | 0.6    | 2.9898 | 3.0273 | 0.1642 | 1.8145 |
| 4/17/2019 22:50 | 0.8    | 0.7    | 5.1244 | 0.2833 | 3.041  | 3.0333 | 0.1559 | 1.8052 |
| 4/17/2019 22:51 | 0.8    | 0.4333 | 4.9987 | 0.65   | 3.0363 | 3      | 0.1672 | 1.8108 |
| 4/17/2019 22:52 | 0.8    | 0.55   | 4.9995 |        | 3.0494 | 3      | 0.1558 | 1.7848 |
| 4/17/2019 22:53 | 0.8083 | 0.6083 | 4.8264 |        | 3.0414 | 3      | 0.164  | 1.7973 |
| 4/17/2019 22:54 | 0.9    | 0.1917 | 5.1692 |        | 3.087  | 3      | 0.1616 | 1.8096 |
| 4/17/2019 22:55 | 0.9    | 0.4167 | 4.9272 |        | 3.0649 | 3      | 0.1564 | 1.8023 |
| 4/17/2019 22:56 | 0.9    | 0.325  | 4.776  |        | 3.0751 | 3      | 0.1627 | 1.7963 |
| 4/17/2019 22:57 | 0.9    | 0.1583 | 4.9526 |        | 3.0762 | 3      | 0.1535 | 1.7693 |
| 4/17/2019 22:58 | 0.8917 | 0.8083 | 4.5646 |        | 3.0997 | 3.0833 | 0.1561 | 1.7883 |
| 4/17/2019 22:59 | 0.8583 | 0.5333 | 5.0742 |        | 3.1044 | 3.0727 | 0.1629 | 1.8188 |
| 4/17/2019 23:00 | 0.8083 | 0.3583 | 5.2989 |        | 3.0779 | 3.0833 | 0.1489 | 1.829  |
| 4/17/2019 23:01 | 0.8917 | 1.0083 | 5.2075 |        | 3.1365 | 3      | 0.161  | 1.7881 |
| 4/17/2019 23:02 | 0.825  | 0.6417 | 4.931  |        | 3.0938 | 3.0417 | 0.152  | 1.7789 |
| 4/17/2019 23:03 | 0.8417 | 0.7167 | 5.1194 |        | 3.0788 | 3.1    | 0.1631 | 1.8069 |
| 4/17/2019 23:04 | 0.8    | 0.8417 | 5.0921 |        | 3.1008 | 3.1    | 0.1628 | 1.791  |
| 4/17/2019 23:05 | 0.8917 | 0.4917 | 4.8723 | 0.2    | 3.0919 | 3.1    | 0.1516 | 1.8088 |
| 4/17/2019 23:06 | 0.9333 | 0.9083 | 5.0972 | 0.8286 | 3.1357 | 3.1    | 0.164  | 1.817  |
| 4/17/2019 23:07 | 0.9917 | 0.1833 | 4.9958 | 0.625  | 3.1291 | 3.1    | 0.1479 | 1.8068 |
| 4/17/2019 23:08 | 1      | 1.2917 | 5.2349 | 0.5    | 3.1358 | 3.0417 | 0.1651 | 1.7944 |
| 4/17/2019 23:09 | 0.9818 | 0.6167 | 4.7514 | 0.6111 | 3.1339 | 3      | 0.1581 | 1.7953 |
| 4/17/2019 23:10 | 0.975  | 1.1833 | 4.7055 | 0.2636 | 3.1307 | 3      | 0.1565 | 1.7907 |
| 4/17/2019 23:11 | 0.9167 | 0.4083 | 5.2526 | 0.75   | 3.1438 | 3      | 0.1637 | 1.8145 |
| 4/17/2019 23:12 | 0.9    | 0.5167 | 4.9732 | 0.8833 | 3.1201 | 3      | 0.1565 | 1.8074 |
| 4/17/2019 23:13 | 0.9167 | 0.5    | 5.0039 | 0.7833 | 3.1308 | 3      | 0.1613 | 1.7753 |

|                 |        |         |        |         |        |        |        |        |
|-----------------|--------|---------|--------|---------|--------|--------|--------|--------|
| 4/17/2019 23:14 | 0.9083 | 0.6583  | 5.0194 | 0.8167  | 3.1313 | 3      | 0.1616 | 1.7689 |
| 4/17/2019 23:15 | 0.925  | 0.5417  | 4.9363 | 0.1667  | 3.1106 | 3      | 0.1561 | 1.7691 |
| 4/17/2019 23:16 | 0.9083 | 0.475   | 4.7053 | 0.7667  | 3.1244 | 3      | 0.1684 | 1.7728 |
| 4/17/2019 23:17 | 0.9    | 0.5167  | 4.5318 | 0.1333  | 3.1305 | 3      | 0.1507 | 1.7966 |
| 4/17/2019 23:18 | 0.8583 | -0.125  | 5.2296 | 0.3833  | 3.1198 | 3      | 0.1657 | 1.8221 |
| 4/17/2019 23:19 | 0.8    | 0.6583  | 4.5492 | 0       | 3.1234 | 3.0364 | 0.1578 | 1.8301 |
| 4/17/2019 23:20 | 0.8583 | 0.575   | 5.4593 | 0.3167  | 3.1433 | 3.1    | 0.1547 | 1.8297 |
| 4/17/2019 23:21 | 0.9    | 0.6083  | 4.5531 | 0.5167  | 3.1281 | 3.1    | 0.1608 | 1.8018 |
| 4/17/2019 23:22 | 0.9    | 0.675   | 4.6147 | 0.2333  | 3.1467 | 3.0727 | 0.1462 | 1.7793 |
| 4/17/2019 23:23 | 0.85   | 0.0083  | 4.7938 | 1.0167  | 3.1364 | 3      | 0.1638 | 1.7449 |
| 4/17/2019 23:24 | 0.825  | 0.4083  | 5.1865 | 0.6333  | 3.1318 | 3.025  | 0.1533 | 1.7693 |
| 4/17/2019 23:25 | 0.8    | 0.925   | 4.9961 | -0.05   | 3.1407 | 3.0417 | 0.1586 | 1.7893 |
| 4/17/2019 23:26 | 0.8    | 1.1417  | 5.0154 | 0.3333  | 3.1538 | 3      | 0.1619 | 1.8115 |
| 4/17/2019 23:27 | 0.8    | 0.9     | 4.5488 | -0.2167 | 3.1473 | 3      | 0.1498 | 1.8313 |
| 4/17/2019 23:28 | 0.8    | -0.0083 | 5.107  | 0.4667  | 3.1735 | 3      | 0.1601 | 1.7842 |
| 4/17/2019 23:29 | 0.8333 | 0.55    | 4.7067 | 0.4833  | 3.1742 | 3      | 0.155  | 1.812  |
| 4/17/2019 23:30 | 0.8167 | 1.15    | 4.9319 | 0.4833  | 3.1528 | 3      | 0.1631 | 1.8151 |
| 4/17/2019 23:31 | 0.8    | 0.8333  | 5.0998 | 0.2333  | 3.1368 | 3      | 0.1576 | 1.8213 |
| 4/17/2019 23:32 | 0.8    | 0.3667  | 4.9945 | 0.6667  | 3.1691 | 2.9667 | 0.1469 | 1.7993 |
| 4/17/2019 23:33 | 0.8    | 0.475   | 4.8975 | 0.05    | 3.1873 | 2.9    | 0.1654 | 1.7932 |
| 4/17/2019 23:34 | 0.8667 | 0.4333  | 4.8902 | 0.2833  | 3.1931 | 2.9    | 0.1527 | 1.7973 |
| 4/17/2019 23:35 | 0.9    | 0.025   | 4.5522 | 0.3833  | 3.1844 | 2.91   | 0.1603 | 1.7741 |
| 4/17/2019 23:36 | 0.9    | 0.625   | 5.0353 | 0.7     | 3.1589 | 2.925  | 0.164  | 1.789  |
| 4/17/2019 23:37 | 0.8583 | 0.2167  | 4.805  | 0.4167  | 3.1627 | 2.9    | 0.1457 | 1.815  |
| 4/17/2019 23:38 | 0.8    | 0.3083  | 4.9052 | 0.1667  | 3.1912 | 2.9    | 0.1613 | 1.8007 |
| 4/17/2019 23:39 | 0.8    | 0.35    | 5.0163 | 0.35    | 3.1572 | 2.9    | 0.1493 | 1.7798 |
| 4/17/2019 23:40 | 0.8    | 0.625   | 4.7997 | 0.1     | 3.159  | 2.9    | 0.1593 | 1.7648 |
| 4/17/2019 23:41 | 0.8    | 0.725   | 4.5998 | 0.7667  | 3.1475 | 2.9    | 0.1604 | 1.7864 |
| 4/17/2019 23:42 | 0.8    | 0.8583  | 5.1657 | 0.9333  | 3.1117 | 2.9    | 0.1502 | 1.7663 |
| 4/17/2019 23:43 | 0.8    | 1.075   | 4.8547 | 0.3     | 3.1124 | 2.875  | 0.1645 | 1.7713 |
| 4/17/2019 23:44 | 0.8    | 0.6833  | 4.849  | 0.2     | 3.0744 | 2.85   | 0.1564 | 1.8008 |
| 4/17/2019 23:45 | 0.8    | 0.6583  | 4.9198 | -0.25   | 3.0906 | 2.8364 | 0.163  | 1.8057 |
| 4/17/2019 23:46 | 0.8    | 0.4     | 4.6633 | 0.0333  | 3.0907 | 2.8    | 0.1609 | 1.7783 |
| 4/17/2019 23:47 | 0.8    | 0.825   | 4.6467 | 0.2333  | 3.0961 | 2.8    | 0.1487 | 1.7875 |
| 4/17/2019 23:48 | 0.8    | 0.575   | 4.9152 | 0.3833  | 3.0861 | 2.8    | 0.1622 | 1.7972 |
| 4/17/2019 23:49 | 0.8917 | 0.65    | 4.5522 | -0.1667 | 3.1061 | 2.8    | 0.1508 | 1.7993 |
| 4/17/2019 23:50 | 0.8833 | 0.9667  | 4.8183 | 0.0833  | 3.0848 | 2.8    | 0.1556 | 1.7802 |
| 4/17/2019 23:51 | 0.8833 | 0.475   | 4.7733 | 0.25    | 3.0742 | 2.8    | 0.1627 | 1.77   |
| 4/17/2019 23:52 | 0.9    | 0.2667  | 4.7345 | 0.8     | 3.0589 | 2.8    | 0.152  | 1.7862 |
| 4/17/2019 23:53 | 0.9    | 0.8417  | 4.754  | 0.15    | 3.0643 | 2.8    | 0.1662 | 1.7992 |
| 4/17/2019 23:54 | 0.9    | 0.7083  | 4.9623 | 0.4333  | 3.0865 | 2.9    | 0.1562 | 1.8108 |
| 4/17/2019 23:55 | 0.925  | 0.0583  | 4.9972 | 0.7667  | 3.0833 | 2.9    | 0.156  | 1.8149 |
| 4/17/2019 23:56 | 1      | -0.2167 | 4.9262 | 0.4333  | 3.1053 | 2.9    | 0.1634 | 1.8203 |
| 4/17/2019 23:57 | 0.95   | 0.0167  | 4.8005 | 0.4     | 3.0743 | 2.9    | 0.1485 | 1.8231 |
| 4/17/2019 23:58 | 0.9    | 0.1083  | 4.7733 | 0.5167  | 3.0777 | 2.9    | 0.1574 | 1.8009 |
| 4/17/2019 23:59 | 0.9167 | 0.7667  | 4.858  | -0.0333 | 3.105  | 2.9    | 0.1583 | 1.7908 |
| 4/18/2019 0:00  | 1      | 1.0917  | 4.963  | 0.6167  | 3.11   | 2.9833 | 0.1448 | 1.7834 |

|                |        |         |        |         |        |        |        |        |
|----------------|--------|---------|--------|---------|--------|--------|--------|--------|
| 4/18/2019 0:01 | 1      | 1.15    | 4.9758 | 1.0333  | 3.1648 | 3      | 0.1626 | 1.7771 |
| 4/18/2019 0:02 | 0.9417 | 0.4417  | 4.7403 | 0.1167  | 3.1529 | 3.0182 | 0.1489 | 1.7826 |
| 4/18/2019 0:03 | 0.9    | 0.575   | 4.6837 | 0.5667  | 3.1839 | 3.0636 | 0.1649 | 1.758  |
| 4/18/2019 0:04 | 0.9    | 0.2     | 4.6055 | -0.2    | 3.1692 | 3.1    | 0.154  | 1.7694 |
| 4/18/2019 0:05 | 0.9    | 0.3083  | 4.6938 | 0.1167  | 3.1608 | 3.075  | 0.1494 | 1.8059 |
| 4/18/2019 0:06 | 0.9    | 0.225   | 4.5393 | 0.6     | 3.2217 | 3      | 0.1622 | 1.821  |
| 4/18/2019 0:07 | 0.8417 | 0.2     | 4.6753 | 0.2667  | 3.2103 | 3      | 0.1491 | 1.8182 |
| 4/18/2019 0:08 | 0.8    | 0.425   | 5.0648 | 0.0333  | 3.2495 | 3      | 0.1558 | 1.8304 |
| 4/18/2019 0:09 | 0.8    | 0.3583  | 4.6558 | -0.0167 | 3.2383 | 3      | 0.1551 | 1.8188 |
| 4/18/2019 0:10 | 0.7667 | 0.6083  | 4.534  | 0.3833  | 3.264  | 3.0636 | 0.1475 | 1.7889 |
| 4/18/2019 0:11 | 0.7    | 0.5     | 4.7975 | 0.2333  | 3.3404 | 3.1    | 0.1658 | 1.7643 |
| 4/18/2019 0:12 | 0.7    | 0.2417  | 4.6937 | 0.5333  | 3.356  | 3.1    | 0.1509 | 1.7728 |
| 4/18/2019 0:13 | 0.7    | 0.0333  | 4.7822 | 0.0167  | 3.2915 | 3.07   | 0.1566 | 1.7993 |
| 4/18/2019 0:14 | 0.6833 | 0.5833  | 4.6007 | 0.3167  | 3.3692 | 3      | 0.1578 | 1.7866 |
| 4/18/2019 0:15 | 0.6    | 0.725   | 4.5558 | 0.3167  | 3.4027 | 3      | 0.1555 | 1.7793 |
| 4/18/2019 0:16 | 0.6    | -0.1083 | 4.6698 | -0.0333 | 3.4127 | 3      | 0.161  | 1.7779 |
| 4/18/2019 0:17 | 0.5917 | 0.125   | 4.5928 | 0.3333  | 3.4272 | 3      | 0.146  | 1.8015 |
| 4/18/2019 0:18 | 0.6    | 0.5917  | 4.8463 | 0.6167  | 3.4213 | 3      | 0.1638 | 1.8134 |
| 4/18/2019 0:19 | 0.6    | 0.025   | 4.6    | -0.2    | 3.4419 | 3      | 0.1601 | 1.7941 |
| 4/18/2019 0:20 | 0.6    | 0.7417  | 4.6928 | 0.2833  | 3.5377 | 3      | 0.1574 | 1.7753 |
| 4/18/2019 0:21 | 0.5417 | -0.1583 | 4.4913 | -0.15   | 3.5267 | 3      | 0.163  | 1.7845 |
| 4/18/2019 0:22 | 0.5    | -0.125  | 4.7442 | 0.2     | 3.5998 | 3      | 0.1501 | 1.7637 |
| 4/18/2019 0:23 | 0.5    | 0.8583  | 4.5248 | 0.3667  | 3.5389 | 3      | 0.1675 | 1.8205 |
| 4/18/2019 0:24 | 0.5    | 0.7833  | 4.5733 | 0.4833  | 3.5413 | 3      | 0.1584 | 1.8107 |
| 4/18/2019 0:25 | 0.5    | 0.8583  | 3.8198 | -0.1    | 3.5457 | 3      | 0.1553 | 1.7975 |
| 4/18/2019 0:26 | 0.5    | 0.0667  | 4.7347 | 0.5833  | 3.5672 | 3      | 0.1663 | 1.7868 |
| 4/18/2019 0:27 | 0.55   | 0.4167  | 4.6143 | 0.3333  | 3.6377 | 3      | 0.1556 | 1.7964 |
| 4/18/2019 0:28 | 0.6    | -0.2417 | 4.3385 | 0.3     | 3.6713 | 3      | 0.1707 | 1.7902 |
| 4/18/2019 0:29 | 0.6    | 0.8583  | 4.4522 | 0.8167  | 3.6539 | 3      | 0.1644 | 1.8263 |
| 4/18/2019 0:30 | 0.625  | 0.3417  | 4.3168 | 0.55    | 3.7146 | 3      | 0.1528 | 1.8398 |
| 4/18/2019 0:31 | 0.65   | 0.225   | 4.3627 | -0.3167 | 3.743  | 3      | 0.1671 | 1.8129 |
| 4/18/2019 0:32 | 0.7    | 0.2083  | 4.736  | -0.1    | 3.7373 | 3      | 0.1536 | 1.8069 |
| 4/18/2019 0:33 | 0.6417 | 0.0333  | 4.2447 | -0.45   | 3.7058 | 3      | 0.1628 | 1.8018 |
| 4/18/2019 0:34 | 0.6083 | -0.175  | 4.4452 | -0.0333 | 3.7266 | 3      | 0.1496 | 1.8234 |
| 4/18/2019 0:35 | 0.6    | 0.3667  | 4.27   | 0.0333  | 3.7746 | 3      | 0.1633 | 1.8134 |
| 4/18/2019 0:36 | 0.6    | 1.0667  | 4.5088 | 0.1167  | 3.7509 | 3      | 0.1709 | 1.8087 |
| 4/18/2019 0:37 | 0.6333 | 0.1667  | 4.3653 | 0.0667  | 3.8508 | 3      | 0.1519 | 1.8027 |
| 4/18/2019 0:38 | 0.7    | 0.25    | 4.27   | 0.0167  | 3.8682 | 3      | 0.1678 | 1.7938 |
| 4/18/2019 0:39 | 0.7    | 0.6167  | 4.5172 | -0.2167 | 3.8255 | 3.0091 | 0.1545 | 1.7783 |
| 4/18/2019 0:40 | 0.7    | -0.6167 | 3.4375 | -0.0833 | 3.8965 | 3.02   | 0.1661 | 1.7568 |
| 4/18/2019 0:41 | 0.7    | -0.3167 | 3.3295 | -0.1667 | 3.903  | 3      | 0.1622 | 1.777  |
| 4/18/2019 0:42 | 0.7    | 0.5583  | 4.8568 | -0.25   | 3.8995 | 3      | 0.1574 | 1.7932 |
| 4/18/2019 0:43 | 0.6917 | -0.1917 | 4.7455 | 0.3     | 3.8406 | 3      | 0.1676 | 1.7993 |
| 4/18/2019 0:44 | 0.6    | 0.175   | 3.921  | 0.3     | 3.8413 | 3      | 0.1556 | 1.8018 |
| 4/18/2019 0:45 | 0.6083 | 0.3583  | 4.5743 | -0.2667 | 3.8345 | 3      | 0.1585 | 1.8155 |
| 4/18/2019 0:46 | 0.6417 | 0.025   | 4.6848 | -0.3167 | 3.8798 | 3      | 0.1613 | 1.8167 |
| 4/18/2019 0:47 | 0.6333 | -0.225  | 4.0365 | -0.55   | 3.8636 | 3      | 0.1576 | 1.8078 |

|                |        |         |        |         |        |        |        |        |
|----------------|--------|---------|--------|---------|--------|--------|--------|--------|
| 4/18/2019 0:48 | 0.6    | 0.3417  | 3.25   | 0.0833  | 3.8913 | 3      | 0.1713 | 1.7798 |
| 4/18/2019 0:49 | 0.6    | 0.3417  | 4.109  | 0.6333  | 3.9174 | 3      | 0.1559 | 1.8021 |
| 4/18/2019 0:50 | 0.6    | 0.5417  | 4.0238 | 0.15    | 3.8856 | 3      | 0.1595 | 1.815  |
| 4/18/2019 0:51 | 0.6    | 0.625   | 4.4558 | -0.2    | 3.8634 | 3      | 0.1649 | 1.8008 |
| 4/18/2019 0:52 | 0.6    | 0.35    | 4.1933 | -0.05   | 3.9012 | 3      | 0.1477 | 1.7976 |
| 4/18/2019 0:53 | 0.6    | 0.5833  | 4.1398 | -0.3167 | 3.8495 | 3      | 0.1677 | 1.8075 |
| 4/18/2019 0:54 | 0.5333 | 0.5667  | 4.54   | -0.2833 | 3.9019 | 3      | 0.16   | 1.8258 |
| 4/18/2019 0:55 | 0.5    | 0.0667  | 4.4863 | -0.2833 | 3.8945 | 3      | 0.1609 | 1.8061 |
| 4/18/2019 0:56 | 0.5    | 0.35    | 5.0468 | -0.0833 | 3.869  | 3      | 0.1674 | 1.8295 |
| 4/18/2019 0:57 | 0.5    | 0.4167  | 4.191  | 0.3     | 3.8771 | 3      | 0.1511 | 1.8467 |
| 4/18/2019 0:58 | 0.5    | -0.1917 | 4.236  | -0.25   | 3.842  | 3      | 0.1677 | 1.8139 |
| 4/18/2019 0:59 | 0.5083 | 0.0667  | 4.227  | 0.1667  | 3.8529 | 3      | 0.1614 | 1.7744 |
| 4/18/2019 1:00 | 0.5917 | -0.2833 | 4.0298 | 0.6167  | 3.8846 | 3      | 0.1628 | 1.8065 |
| 4/18/2019 1:01 | 0.6    | -0.1833 | 4.2213 | -0.0333 | 3.8802 | 3      | 0.1669 | 1.8311 |
| 4/18/2019 1:02 | 0.6    | -0.0333 | 5.2283 | 0.1667  | 3.8482 | 3      | 0.152  | 1.8013 |
| 4/18/2019 1:03 | 0.6    | 0.275   | 4.0244 | 0.4833  | 3.8485 | 3      | 0.1651 | 1.8092 |
| 4/18/2019 1:04 | 0.6    | -0.1583 | 4.3152 | -0.1167 | 3.8633 | 3      | 0.1593 | 1.8199 |
| 4/18/2019 1:05 | 0.6    | 0.5583  | 4.3923 | -0.1333 | 3.866  | 3      | 0.159  | 1.8228 |
| 4/18/2019 1:06 | 0.6    | 0.3333  | 4.0008 | 0.2     | 3.8636 | 3.0167 | 0.165  | 1.8311 |
| 4/18/2019 1:07 | 0.6    | 0.3083  | 4.3843 | -0.3333 | 3.8566 | 3.1    | 0.1503 | 1.8302 |
| 4/18/2019 1:08 | 0.6    | 0.3417  | 4.3955 | 0.15    | 3.8796 | 3.1    | 0.1652 | 1.8466 |
| 4/18/2019 1:09 | 0.625  | -0.0083 | 4.5413 | 0.0833  | 3.8688 | 3.1    | 0.156  | 1.8448 |
| 4/18/2019 1:10 | 0.7    | 0.35    | 4.639  | 0.5167  | 3.8841 | 3.1091 | 0.1576 | 1.8168 |
| 4/18/2019 1:11 | 0.7    | 0.725   | 4.3537 | 0.1667  | 3.8663 | 3.1778 | 0.1641 | 1.8388 |
| 4/18/2019 1:12 | 0.7    | 0.925   | 3.9903 | -0.3833 | 3.8478 | 3.2    | 0.1515 | 1.8309 |
| 4/18/2019 1:13 | 0.7    | 0.7083  | 3.9163 | -0.3167 | 3.8368 | 3.2    | 0.1721 | 1.8019 |
| 4/18/2019 1:14 | 0.7    | 0.1333  | 4.5145 | 0.0667  | 3.8301 | 3.2    | 0.1461 | 1.8    |
| 4/18/2019 1:15 | 0.7    | 0.1667  | 4.2265 | 0.5167  | 3.8231 | 3.2    | 0.17   | 1.7867 |
| 4/18/2019 1:16 | 0.7    | 0.1167  | 4.0581 | -0.0167 | 3.8233 | 3.15   | 0.1602 | 1.7943 |
| 4/18/2019 1:17 | 0.7083 | 0.0667  | 4.4617 | 1.0833  | 3.8128 | 3.2    | 0.1564 | 1.805  |
| 4/18/2019 1:18 | 0.7167 | 0.8     | 4.0926 | 0.0667  | 3.8062 | 3.2    | 0.1676 | 1.8145 |
| 4/18/2019 1:19 | 0.7091 | 0.9417  | 4.3143 | 0.2     | 3.7875 | 3.2    | 0.1517 | 1.8208 |
| 4/18/2019 1:20 | 0.7583 | -0.05   | 4.2708 | 0.1333  | 3.7901 | 3.2    | 0.1627 | 1.829  |
| 4/18/2019 1:21 | 0.7083 | 0.125   | 4.141  | 0.0333  | 3.7912 | 3.2    | 0.1691 | 1.8333 |
| 4/18/2019 1:22 | 0.7    | 0.3     | 4.0227 | 0.35    | 3.7722 | 3.2    | 0.1551 | 1.8339 |
| 4/18/2019 1:23 | 0.6833 | 0.0917  | 4.3295 | 0.0333  | 3.7795 | 3.1    | 0.1707 | 1.7969 |
| 4/18/2019 1:24 | 0.675  | 0.3417  | 4.4241 | 0.1667  | 3.7468 | 3.1    | 0.1559 | 1.8063 |
| 4/18/2019 1:25 | 0.7    | 0.0333  | 4.2511 | -0.3    | 3.7498 | 3.1    | 0.1662 | 1.8188 |
| 4/18/2019 1:26 | 0.7    | 0.4     | 4.2352 | 0.05    | 3.7437 | 3.1    | 0.1655 | 1.8201 |
| 4/18/2019 1:27 | 0.7    | -0.2417 | 4.6584 | 0.2167  | 3.7493 | 3.1    | 0.1511 | 1.801  |
| 4/18/2019 1:28 | 0.7    | 0.4917  | 4.3918 | -0.45   | 3.7556 | 3.1    | 0.1677 | 1.8168 |
| 4/18/2019 1:29 | 0.7    | 0.0667  | 4.274  | -0.1    | 3.7286 | 3.1    | 0.1552 | 1.8258 |
| 4/18/2019 1:30 | 0.7083 | 0.45    | 4.3492 | 0.2333  | 3.7414 | 3.0182 | 0.1619 | 1.8002 |
| 4/18/2019 1:31 | 0.7    | 0.3     | 4.467  | -0.3167 | 3.7374 | 3      | 0.1568 | 1.8116 |
| 4/18/2019 1:32 | 0.7    | 0.6     | 4.4516 | 0.2833  | 3.7419 | 3      | 0.1603 | 1.7966 |
| 4/18/2019 1:33 | 0.675  | 0.0333  | 4.1899 | -0.1333 | 3.7654 | 3      | 0.1649 | 1.765  |
| 4/18/2019 1:34 | 0.6667 | 0.1417  | 4.1653 | 0.4667  | 3.746  | 3      | 0.1508 | 1.788  |



|                |        |         |        |         |        |        |        |        |
|----------------|--------|---------|--------|---------|--------|--------|--------|--------|
| 4/18/2019 1:35 | 0.65   | -0.3833 | 3.9859 | 0.6833  | 3.7466 | 3      | 0.1626 | 1.8031 |
| 4/18/2019 1:36 | 0.525  | -0.1417 | 3.881  | -0.0667 | 3.7549 | 3      | 0.1614 | 1.7906 |
| 4/18/2019 1:37 | 0.5083 | 0.25    | 4.0931 | 0.3833  | 3.7832 | 2.9545 | 0.1541 | 1.8533 |
| 4/18/2019 1:38 | 0.5    | 0.275   | 4.2718 | 0.6667  | 3.785  | 3      | 0.1632 | 1.8408 |
| 4/18/2019 1:39 | 0.5167 | 0.55    | 3.8088 | 0.2333  | 3.815  | 3      | 0.1534 | 1.8262 |
| 4/18/2019 1:40 | 0.5    | -0.35   | 3.5981 | 0.4667  | 3.8183 | 3      | 0.1614 | 1.7967 |
| 4/18/2019 1:41 | 0.5    | 0.0833  | 3.9941 | 0.5333  | 3.8218 | 3.0364 | 0.1583 | 1.7705 |
| 4/18/2019 1:42 | 0.5167 | 0.55    | 4.2974 | 0.45    | 3.824  | 3.1    | 0.1549 | 1.7743 |
| 4/18/2019 1:43 | 0.5833 | 0.7417  | 4.0161 | 0.1167  | 3.8164 | 3.1    | 0.1671 | 1.7564 |
| 4/18/2019 1:44 | 0.5917 | 0.125   | 4.0563 | -0.6833 | 3.7762 | 3.1    | 0.1479 | 1.7672 |
| 4/18/2019 1:45 | 0.6    | 0.3917  | 3.981  | -0.3167 | 3.7638 | 3.1    | 0.1628 | 1.7913 |
| 4/18/2019 1:46 | 0.6    | 0.475   | 4.35   | 0.15    | 3.7736 | 3.1091 | 0.1595 | 1.8002 |
| 4/18/2019 1:47 | 0.525  | 0.1167  | 4.0461 | -0.0333 | 3.77   | 3.2    | 0.1554 | 1.8168 |
| 4/18/2019 1:48 | 0.5    | -0.1167 | 4.5797 | 0.6     | 3.7739 | 3.2    | 0.17   | 1.8088 |
| 4/18/2019 1:49 | 0.5    | 0.125   | 4.0363 | 0.25    | 3.7643 | 3.2    | 0.1501 | 1.8199 |
| 4/18/2019 1:50 | 0.5    | 0.2167  | 4.2282 | 0.1     | 3.7955 | 3.2    | 0.1648 | 1.7979 |
| 4/18/2019 1:51 | 0.4833 | -0.1    | 4.1183 | 0.1     | 3.8007 | 3.1273 | 0.1544 | 1.7998 |
| 4/18/2019 1:52 | 0.5    | 0.025   | 4.1228 | 0.2833  | 3.7824 | 3.1    | 0.1605 | 1.7843 |
| 4/18/2019 1:53 | 0.5417 | 0.3167  | 4.1285 | 0.05    | 3.8113 | 3.1    | 0.1592 | 1.7713 |
| 4/18/2019 1:54 | 0.6    | 0.7417  | 4.4165 | -0.05   | 3.8026 | 3.0818 | 0.1549 | 1.7955 |
| 4/18/2019 1:55 | 0.5083 | 0.2333  | 4.1352 | 0       | 3.8103 | 3      | 0.1628 | 1.8368 |
| 4/18/2019 1:56 | 0.5    | 0.1417  | 3.9494 | 0.65    | 3.7778 | 3      | 0.1534 | 1.8548 |
| 4/18/2019 1:57 | 0.55   | 0.3167  | 3.6352 | -0.0833 | 3.8111 | 3      | 0.1517 | 1.827  |
| 4/18/2019 1:58 | 0.6    | -0.3167 | 4.533  | 0.15    | 3.7637 | 3      | 0.1644 | 1.8222 |
| 4/18/2019 1:59 | 0.6    | 0.1667  | 3.5765 | 0.1333  | 3.7566 | 3      | 0.1573 | 1.7999 |
| 4/18/2019 2:00 | 0.6    | 0.1167  | 3.8538 | -0.3333 | 3.7833 | 3      | 0.1739 | 1.8027 |
| 4/18/2019 2:01 | 0.6    | -0.075  | 3.9569 | 0.25    | 3.7823 | 3      | 0.1552 | 1.8246 |
| 4/18/2019 2:02 | 0.6    | 0.0917  | 4.798  | -0.3333 | 3.7566 | 3      | 0.1573 | 1.8146 |
| 4/18/2019 2:03 | 0.6    | -0.025  | 4.0374 | -0.0833 | 3.7748 | 3      | 0.1615 | 1.8047 |
| 4/18/2019 2:04 | 0.6    | 0.3083  | 4.1263 | -0.0333 | 3.7618 | 3      | 0.1493 | 1.8339 |
| 4/18/2019 2:05 | 0.6    | 0.0417  | 3.7462 | 0.25    | 3.7603 | 3.0727 | 0.1618 | 1.8328 |
| 4/18/2019 2:06 | 0.6    | -0.6417 | 3.6882 | 0.05    | 3.7401 | 3.1182 | 0.1558 | 1.8234 |
| 4/18/2019 2:07 | 0.6    | -0.0083 | 3.9982 | 0.1333  | 3.7616 | 3.2    | 0.1533 | 1.8333 |
| 4/18/2019 2:08 | 0.5583 | 0.2167  | 3.8749 | 0.1833  | 3.7268 | 3.2    | 0.1636 | 1.855  |
| 4/18/2019 2:09 | 0.6    | 0.2667  | 4.2388 | 0.3667  | 3.7538 | 3.2    | 0.1505 | 1.8179 |
| 4/18/2019 2:10 | 0.6    | 0.2417  | 4.0217 | -0.2667 | 3.7494 | 3.2    | 0.1607 | 1.8163 |
| 4/18/2019 2:11 | 0.6    | 0.8917  | 4.3538 | -0.3    | 3.7568 | 3.2909 | 0.1644 | 1.8148 |
| 4/18/2019 2:12 | 0.5167 | 0.1917  | 4.1903 | -0.1    | 3.7558 | 3.2889 | 0.1516 | 1.7988 |
| 4/18/2019 2:13 | 0.5    | 0.2833  | 4.0002 | -0.4833 | 3.7402 | 3.28   | 0.1655 | 1.7794 |
| 4/18/2019 2:14 | 0.5    | 1.1167  | 3.7814 | -0.5    | 3.7435 | 3.3    | 0.1504 | 1.8111 |
| 4/18/2019 2:15 | 0.5    | 0.0083  | 3.8792 | -0.1    | 3.7663 | 3.27   | 0.1612 | 1.8371 |
| 4/18/2019 2:16 | 0.5    | 0.6333  | 3.9566 | -0.1667 | 3.7725 | 3.2    | 0.1612 | 1.8307 |
| 4/18/2019 2:17 | 0.5    | 0.2     | 4.4617 | -0.1833 | 3.7509 | 3.2    | 0.1577 | 1.8336 |
| 4/18/2019 2:18 | 0.5    | 0.3333  | 3.8347 | -0.55   | 3.7743 | 3.2    | 0.1666 | 1.8017 |
| 4/18/2019 2:19 | 0.5    | 0.35    | 4.0957 | -0.2    | 3.7681 | 3.1364 | 0.1562 | 1.7997 |
| 4/18/2019 2:20 | 0.5    | 0.5667  | 3.5909 | -0.1    | 3.7959 | 3.2    | 0.1631 | 1.8105 |
| 4/18/2019 2:21 | 0.5167 | -0.0917 | 3.9137 | -0.4333 | 3.7966 | 3.2    | 0.1605 | 1.7969 |

|                |        |         |        |         |        |        |        |        |
|----------------|--------|---------|--------|---------|--------|--------|--------|--------|
| 4/18/2019 2:22 | 0.5667 | -0.0833 | 4.0759 | 0.2333  | 3.8012 | 3.12   | 0.1565 | 1.801  |
| 4/18/2019 2:23 | 0.6    | 0.0583  | 4.027  | -0.3167 | 3.8317 | 3.1    | 0.1709 | 1.8327 |
| 4/18/2019 2:24 | 0.6    | 0       | 3.4241 | 0.0667  | 3.8455 | 3.1    | 0.1511 | 1.8416 |
| 4/18/2019 2:25 | 0.6    | 0.525   | 3.358  | -0.6    | 3.8533 | 3.1    | 0.1609 | 1.8369 |
| 4/18/2019 2:26 | 0.5167 | 0.5083  | 3.7423 | -0.5    | 3.8482 | 3.1    | 0.164  | 1.8458 |
| 4/18/2019 2:27 | 0.5    | 0.6667  | 4.0208 | -0.2167 | 3.8613 | 3.1    | 0.1574 | 1.82   |
| 4/18/2019 2:28 | 0.4833 | 0.3167  | 4.0155 | 0.1667  | 3.8528 | 3.1    | 0.1643 | 1.8088 |
| 4/18/2019 2:29 | 0.4    | -0.0167 | 3.495  | -0.1833 | 3.9209 | 3.1    | 0.15   | 1.7972 |
| 4/18/2019 2:30 | 0.4    | 0.075   | 3.7431 | 0.3     | 3.9077 | 3.1    | 0.1632 | 1.8052 |
| 4/18/2019 2:31 | 0.4167 | -0.6583 | 3.8938 | -0.1    | 3.8845 | 3.1    | 0.1607 | 1.7933 |
| 4/18/2019 2:32 | 0.45   | -0.3417 | 3.9528 | -0.5167 | 3.9181 | 3.1636 | 0.1572 | 1.8195 |
| 4/18/2019 2:33 | 0.425  | 0.225   | 4.0593 | 0       | 3.973  | 3.16   | 0.1666 | 1.8403 |
| 4/18/2019 2:34 | 0.4083 | -0.025  | 3.6313 | 0.0833  | 4.0198 | 3.2    | 0.1503 | 1.819  |
| 4/18/2019 2:35 | 0.4    | -0.15   | 3.8107 | -0.4167 | 4.009  | 3.2    | 0.159  | 1.8328 |
| 4/18/2019 2:36 | 0.4    | -0.2417 | 4.1592 | -0.2667 | 4.0035 | 3.2    | 0.1618 | 1.8313 |
| 4/18/2019 2:37 | 0.4    | -0.0583 | 3.7308 | 0.0167  | 3.9976 | 3.2    | 0.1539 | 1.8533 |
| 4/18/2019 2:38 | 0.3667 | -0.3167 | 3.7865 | -0.0167 | 4.0373 | 3.2    | 0.1669 | 1.8634 |
| 4/18/2019 2:39 | 0.3    | -0.3583 | 3.7713 | -0.1833 | 4.0524 | 3.2    | 0.1513 | 1.8498 |
| 4/18/2019 2:40 | 0.3    | 0.4833  | 3.844  | -0.25   | 4.0643 | 3.2    | 0.1677 | 1.8548 |
| 4/18/2019 2:41 | 0.3    | -0.2667 | 4.0137 | -0.4833 | 4.0897 | 3.28   | 0.1641 | 1.8238 |
| 4/18/2019 2:42 | 0.3    | -0.45   | 3.7147 | -0.1667 | 4.1    | 3.3    | 0.153  | 1.8211 |
| 4/18/2019 2:43 | 0.2    | 0.4417  | 3.329  | 0.15    | 4.112  | 3.3    | 0.1689 | 1.8358 |
| 4/18/2019 2:44 | 0.2    | -0.2333 | 3.8558 | 0.2333  | 4.1199 | 3.3    | 0.1525 | 1.8505 |
| 4/18/2019 2:45 | 0.2417 | 0.175   | 3.8208 | -0.15   | 4.1531 | 3.3    | 0.1648 | 1.8386 |
| 4/18/2019 2:46 | 0.3    | 0.4917  | 4.347  | -0.3167 | 4.1704 | 3.3    | 0.1601 | 1.837  |
| 4/18/2019 2:47 | 0.3    | 0.55    | 3.6827 | -0.3667 | 4.249  | 3.3    | 0.1577 | 1.8041 |
| 4/18/2019 2:48 | 0.3    | -0.65   | 3.4087 | -0.5333 | 4.2854 | 3.3    | 0.1706 | 1.8163 |
| 4/18/2019 2:49 | 0.3    | -0.0083 | 3.5677 | -0.75   | 4.2785 | 3.3    | 0.1546 | 1.844  |
| 4/18/2019 2:50 | 0.3    | 0.3083  | 4.222  | -0.4167 | 4.3123 | 3.3    | 0.1636 | 1.8339 |
| 4/18/2019 2:51 | 0.3    | -0.7667 | 2.7827 | -0.5    | 4.3827 | 3.3    | 0.1651 | 1.8289 |
| 4/18/2019 2:52 | 0.3    | 0.2333  | 3.3598 | 0.1333  | 4.389  | 3.3    | 0.1595 | 1.8533 |
| 4/18/2019 2:53 | 0.2833 | -0.1    | 3.3482 | -0.55   | 4.4746 | 3.3    | 0.1713 | 1.8626 |
| 4/18/2019 2:54 | 0.2    | -0.075  | 3.2532 | -0.35   | 4.5214 | 3.3    | 0.1565 | 1.8471 |
| 4/18/2019 2:55 | 0.2    | 0.5917  | 3.1015 | -0.5167 | 4.5372 | 3.3    | 0.1646 | 1.8317 |
| 4/18/2019 2:56 | 0.2    | -0.2667 | 3.4937 | -0.3667 | 4.4983 | 3.3    | 0.1611 | 1.8252 |
| 4/18/2019 2:57 | 0.2    | -0.2167 | 3.7802 | -0.0833 | 4.6198 | 3.3    | 0.1635 | 1.8364 |
| 4/18/2019 2:58 | 0.2    | -0.1    | 3.586  | 0       | 4.6556 | 3.3    | 0.1727 | 1.8407 |
| 4/18/2019 2:59 | 0.2    | 0.1417  | 3.1063 | 0.0667  | 4.7505 | 3.3    | 0.158  | 1.8013 |
| 4/18/2019 3:00 | 0.2    | -0.4833 | 3.4078 | -0.3667 | 4.6877 | 3.3    | 0.1682 | 1.7878 |
| 4/18/2019 3:01 | 0.1417 | -0.45   | 3.5877 | -0.25   | 4.8283 | 3.33   | 0.1619 | 1.8064 |
| 4/18/2019 3:02 | 0.1083 | 0.05    | 3.919  | 0.2167  | 4.8748 | 3.4    | 0.1637 | 1.8281 |
| 4/18/2019 3:03 | 0.1917 | -0.1167 | 3.0772 | -0.35   | 4.8993 | 3.4273 | 0.1673 | 1.836  |
| 4/18/2019 3:04 | 0.2    | -0.7917 | 3.2482 | -0.05   | 4.9372 | 3.5    | 0.155  | 1.8188 |
| 4/18/2019 3:05 | 0.2    | -0.4167 | 3.0995 | 0.3167  | 4.9868 | 3.5    | 0.1706 | 1.8278 |
| 4/18/2019 3:06 | 0.2    | 0.0333  | 3.4047 | -0.3    | 4.9443 | 3.53   | 0.1612 | 1.8363 |
| 4/18/2019 3:07 | 0.1917 | -0.5083 | 2.9272 | -0.3333 | 5.0103 | 3.6    | 0.1605 | 1.7935 |
| 4/18/2019 3:08 | 0.2    | -0.3167 | 3.4512 | -0.4    | 4.9232 | 3.6    | 0.1715 | 1.8098 |

|                |        |         |        |         |        |        |        |        |
|----------------|--------|---------|--------|---------|--------|--------|--------|--------|
| 4/18/2019 3:09 | 0.2    | 0.1417  | 3.1173 | 0       | 5.0123 | 3.6    | 0.1571 | 1.8168 |
| 4/18/2019 3:10 | 0.2    | 0.325   | 2.9077 | 0.05    | 5.146  | 3.6    | 0.1651 | 1.8345 |
| 4/18/2019 3:11 | 0.2    | 0.2083  | 3.2445 | -0.4833 | 5.059  | 3.6091 | 0.1645 | 1.8345 |
| 4/18/2019 3:12 | 0.2083 | -0.925  | 3.9383 | -0.4333 | 5.2373 | 3.7    | 0.1654 | 1.8203 |
| 4/18/2019 3:13 | 0.2    | -0.9167 | 3.3273 | -0.3833 | 5.2372 | 3.7    | 0.1739 | 1.8303 |
| 4/18/2019 3:14 | 0.2    | -0.8667 | 2.9738 | -0.4167 | 5.2979 | 3.7    | 0.1607 | 1.8477 |
| 4/18/2019 3:15 | 0.125  | -0.0917 | 3.0995 | -0.35   | 5.2618 | 3.7    | 0.1665 | 1.8476 |
| 4/18/2019 3:16 | 0.125  | -0.5417 | 3.3725 | -0.3167 | 5.339  | 3.7667 | 0.1634 | 1.8605 |
| 4/18/2019 3:17 | 0.125  | 0.275   | 3.4028 | 0.0667  | 5.2819 | 3.8    | 0.1587 | 1.854  |
| 4/18/2019 3:18 | 0.1    | -0.25   | 3.2407 | -0.7167 | 5.2744 | 3.8    | 0.1693 | 1.8431 |
| 4/18/2019 3:19 | 0.1    | -0.2583 | 3.437  | -0.05   | 5.3631 | 3.8    | 0.1556 | 1.8534 |
| 4/18/2019 3:20 | 0.1167 | -0.55   | 3.7913 | 0.0833  | 5.4129 | 3.85   | 0.1703 | 1.8459 |
| 4/18/2019 3:21 | 0.1    | 0.1417  | 3.349  | -0.8167 | 5.5255 | 3.9    | 0.1763 | 1.8441 |
| 4/18/2019 3:22 | 0.1    | -0.1583 | 3.1328 | -0.45   | 5.5758 | 3.9    | 0.1622 | 1.8235 |
| 4/18/2019 3:23 | 0.1    | 0.2417  | 3.389  | -0.0167 | 5.4309 | 3.94   | 0.1736 | 1.8352 |
| 4/18/2019 3:24 | 0.1    | -0.55   | 3.202  | -0.2667 | 5.7407 | 4      | 0.1606 | 1.8191 |
| 4/18/2019 3:25 | 0.1    | -0.2583 | 3.073  | -0.5333 | 5.6543 | 4      | 0.1733 | 1.7998 |
| 4/18/2019 3:26 | 0.1    | -0.3667 | 3.3237 | -0.6333 | 5.5819 | 4      | 0.1659 | 1.7942 |
| 4/18/2019 3:27 | 0.1    | 0.2     | 3.079  | 0.55    | 5.6178 | 4      | 0.165  | 1.8333 |
| 4/18/2019 3:28 | 0.1    | -0.4917 | 2.9937 | -0.9667 | 5.6026 | 4      | 0.1744 | 1.8417 |
| 4/18/2019 3:29 | 0.1    | 0.125   | 3.4278 | -0.2333 | 5.5925 | 4.01   | 0.1624 | 1.8788 |
| 4/18/2019 3:30 | 0.1    | -0.2417 | 3.54   | -0.3333 | 5.5738 | 4.1    | 0.167  | 1.886  |
| 4/18/2019 3:31 | 0.1    | -1.5083 | 3.247  | -0.6333 | 5.5519 | 4.1    | 0.1703 | 1.8473 |
| 4/18/2019 3:32 | 0.1833 | 0.475   | 2.7493 | -0.6    | 5.737  | 4.1    | 0.1616 | 1.8164 |
| 4/18/2019 3:33 | 0.2    | 0.125   | 3.2558 | -0.45   | 5.7647 | 4.1    | 0.1728 | 1.8184 |
| 4/18/2019 3:34 | 0.2    | -0.35   | 3.1667 | -0.5    | 5.7405 | 4.125  | 0.1582 | 1.8361 |
| 4/18/2019 3:35 | 0.15   | -0.2417 | 3.0272 | -0.3333 | 5.8671 | 4.2    | 0.1746 | 1.8395 |
| 4/18/2019 3:36 | 0.2    | -0.025  | 3.3468 | -0.1833 | 5.8978 | 4.2    | 0.1702 | 1.873  |
| 4/18/2019 3:37 | 0.2    | -0.3417 | 3.025  | -0.5833 | 5.8584 | 4.2    | 0.1674 | 1.8783 |
| 4/18/2019 3:38 | 0.2    | -0.4167 | 2.966  | -0.5667 | 5.803  | 4.2273 | 0.1734 | 1.8564 |
| 4/18/2019 3:39 | 0.2    | -0.0333 | 2.9082 | -0.7333 | 5.8981 | 4.2818 | 0.1612 | 1.8647 |
| 4/18/2019 3:40 | 0.2    | 0.1917  | 3.1433 | -0.1833 | 5.9469 | 4.3    | 0.1786 | 1.855  |
| 4/18/2019 3:41 | 0.2    | -0.725  | 3.2835 | -0.2667 | 6.0015 | 4.3889 | 0.1611 | 1.8657 |
| 4/18/2019 3:42 | 0.2    | -0.45   | 3.3993 | -0.6    | 5.9596 | 4.4    | 0.1737 | 1.8718 |
| 4/18/2019 3:43 | 0.2083 | 0.0917  | 3.0245 | 0.1667  | 5.9873 | 4.4    | 0.1773 | 1.8715 |
| 4/18/2019 3:44 | 0.2    | -0.4667 | 3.3032 | -0.2667 | 5.979  | 4.4333 | 0.1653 | 1.8306 |
| 4/18/2019 3:45 | 0.2    | 0.0583  | 2.8082 | -0.5833 | 5.9784 | 4.5    | 0.1776 | 1.7933 |
| 4/18/2019 3:46 | 0.2    | -0.675  | 3.0153 | -0.8667 | 5.9899 | 4.5    | 0.1671 | 1.806  |
| 4/18/2019 3:47 | 0.2    | -0.5583 | 2.9513 | -0.6167 | 6.0053 | 4.56   | 0.1799 | 1.8105 |
| 4/18/2019 3:48 | 0.2    | -0.0583 | 2.9008 | 0.2167  | 6.0624 | 4.6    | 0.1746 | 1.8013 |
| 4/18/2019 3:49 | 0.2    | -0.1667 | 3.6597 | -0.1167 | 6.1423 | 4.6    | 0.1641 | 1.7913 |
| 4/18/2019 3:50 | 0.2    | -0.4167 | 3.3418 | -0.15   | 6.0603 | 4.5727 | 0.177  | 1.7985 |
| 4/18/2019 3:51 | 0.2    | -0.5583 | 3.0498 | -0.75   | 6.1778 | 4.6    | 0.1704 | 1.8329 |
| 4/18/2019 3:52 | 0.2    | -0.5333 | 3.1632 | -0.65   | 6.1    | 4.6    | 0.1776 | 1.8626 |
| 4/18/2019 3:53 | 0.2    | -0.7833 | 3.0447 | -0.2    | 6.1183 | 4.6    | 0.1742 | 1.8526 |
| 4/18/2019 3:54 | 0.2    | -0.9667 | 2.7368 | -0.55   | 6.1494 | 4.6    | 0.165  | 1.847  |
| 4/18/2019 3:55 | 0.2    | -0.55   | 3.0728 | -0.45   | 6.2352 | 4.62   | 0.183  | 1.8413 |

|                |        |         |        |         |        |        |        |        |
|----------------|--------|---------|--------|---------|--------|--------|--------|--------|
| 4/18/2019 3:56 | 0.2    | -0.625  | 3.1128 | -0.1667 | 6.1984 | 4.7    | 0.172  | 1.8645 |
| 4/18/2019 3:57 | 0.2    | -0.5667 | 3.2372 | -0.15   | 6.2076 | 4.7    | 0.1742 | 1.8514 |
| 4/18/2019 3:58 | 0.2    | -0.5583 | 3.1057 | 0.1     | 6.2038 | 4.65   | 0.1765 | 1.8115 |
| 4/18/2019 3:59 | 0.1727 | -0.45   | 3.131  | -0.3833 | 6.2063 | 4.7    | 0.1681 | 1.8263 |
| 4/18/2019 4:00 | 0.175  | -0.475  | 2.9647 | -0.6    | 6.2431 | 4.7    | 0.1797 | 1.8314 |
| 4/18/2019 4:01 | 0.1    | -0.2    | 3.1353 | -0.3333 | 6.2563 | 4.7    | 0.1669 | 1.8334 |
| 4/18/2019 4:02 | 0.1    | 0.125   | 3.1174 | -0.6    | 6.1875 | 4.7833 | 0.1768 | 1.7999 |
| 4/18/2019 4:03 | 0.1    | -0.2167 | 3.0293 | -0.3333 | 6.2156 | 4.8    | 0.18   | 1.8258 |
| 4/18/2019 4:04 | 0.1    | 0.1167  | 3.1177 | -0.6333 | 6.3217 | 4.8    | 0.168  | 1.8506 |
| 4/18/2019 4:05 | 0.1    | 0.475   | 3.3218 | -0.5333 | 6.2386 | 4.8    | 0.1815 | 1.8562 |
| 4/18/2019 4:06 | 0.1    | -0.5333 | 2.7883 | -0.3833 | 6.3072 | 4.8    | 0.1625 | 1.8432 |
| 4/18/2019 4:07 | 0.1    | -1.425  | 3.0785 | -0.1167 | 6.2162 | 4.8    | 0.1808 | 1.8409 |
| 4/18/2019 4:08 | 0.1    | -0.2333 | 2.9412 | 0.1667  | 6.3178 | 4.9    | 0.1754 | 1.8538 |
| 4/18/2019 4:09 | 0.1    | 0.25    | 3.061  | 0.0667  | 6.3013 | 4.9    | 0.1625 | 1.863  |
| 4/18/2019 4:10 | 0.1    | -0.1667 | 3.0017 | -0.1167 | 6.3053 | 4.9    | 0.186  | 1.8629 |
| 4/18/2019 4:11 | 0.0333 | -0.225  | 3.0445 | -0.6667 | 6.2263 | 4.9    | 0.1707 | 1.844  |
| 4/18/2019 4:12 | 0      | -0.025  | 3.2804 | 0.0333  | 6.2167 | 4.9    | 0.1774 | 1.8683 |
| 4/18/2019 4:13 | 0.0083 | -0.5167 | 3.0238 | -0.1167 | 6.3292 | 4.9    | 0.1753 | 1.8546 |
| 4/18/2019 4:14 | 0.1    | -0.1583 | 3.0989 | -0.4333 | 6.3718 | 4.9    | 0.1765 | 1.8368 |
| 4/18/2019 4:15 | 0.1417 | -0.7    | 2.9543 | -0.2167 | 6.3698 | 4.9    | 0.1759 | 1.8618 |
| 4/18/2019 4:16 | 0.125  | -0.15   | 3.2778 | -0.1333 | 6.3678 | 4.9    | 0.1694 | 1.846  |
| 4/18/2019 4:17 | 0.1    | -1.0917 | 2.9801 | -0.1833 | 6.3744 | 4.9    | 0.183  | 1.8527 |
| 4/18/2019 4:18 | 0.1    | -0.5    | 2.858  | -1.5833 | 6.433  | 4.9    | 0.1795 | 1.8531 |
| 4/18/2019 4:19 | 0.1    | -0.925  | 2.819  | 0.0667  | 6.4534 | 4.9    | 0.1691 | 1.8593 |
| 4/18/2019 4:20 | 0.1833 | 0.25    | 3.0973 | -0.25   | 6.5245 | 4.9    | 0.1824 | 1.8572 |
| 4/18/2019 4:21 | 0.2    | -0.5417 | 3.1026 | -0.5667 | 6.5349 | 4.9    | 0.1713 | 1.8422 |
| 4/18/2019 4:22 | 0.2    | -0.725  | 2.9028 | -0.4167 | 6.4801 | 4.9    | 0.1826 | 1.8624 |
| 4/18/2019 4:23 | 0.2    | -0.9083 | 3.0637 | -0.8    | 6.455  | 4.9182 | 0.1708 | 1.8743 |
| 4/18/2019 4:24 | 0.2    | 0.0583  | 3.0035 | -0.7167 | 6.5083 | 5      | 0.1712 | 1.8404 |
| 4/18/2019 4:25 | 0.2    | -0.575  | 3.2364 | -0.6833 | 6.559  | 5.0455 | 0.179  | 1.8054 |
| 4/18/2019 4:26 | 0.2    | -0.4333 | 2.6673 | -0.9833 | 6.5233 | 5.1    | 0.1658 | 1.8393 |
| 4/18/2019 4:27 | 0.2083 | -0.2667 | 3.2216 | -0.3333 | 6.6124 | 5.2    | 0.1832 | 1.8486 |
| 4/18/2019 4:28 | 0.2    | -0.3917 | 2.434  | -0.6    | 6.6355 | 5.2167 | 0.1723 | 1.8594 |
| 4/18/2019 4:29 | 0.2333 | 0.1167  | 2.5863 | -0.25   | 6.5568 | 5.3    | 0.1725 | 1.872  |
| 4/18/2019 4:30 | 0.2167 | -0.3    | 3.0913 | -0.3    | 6.5593 | 5.3727 | 0.1789 | 1.8714 |
| 4/18/2019 4:31 | 0.2    | 0.025   | 2.7178 | -0.8667 | 6.5684 | 5.4    | 0.1667 | 1.8638 |
| 4/18/2019 4:32 | 0.1667 | -0.0667 | 3.2084 | -0.7167 | 6.617  | 5.4417 | 0.1809 | 1.8625 |
| 4/18/2019 4:33 | 0.1583 | 0.5583  | 3.3618 | -0.7167 | 6.6513 | 5.5    | 0.1721 | 1.8683 |
| 4/18/2019 4:34 | 0.2    | 0.4583  | 3.3562 | -1.2    | 6.6176 | 5.5833 | 0.177  | 1.8615 |
| 4/18/2019 4:35 | 0.2    | -0.8333 | 3.0184 | -0.8833 | 6.6726 | 5.6    | 0.176  | 1.872  |
| 4/18/2019 4:36 | 0.2    | -0.225  | 3.1449 | -0.5    | 6.6509 | 5.6455 | 0.1677 | 1.8653 |
| 4/18/2019 4:37 | 0.1667 | -1.075  | 3.0835 | -0.45   | 6.6788 | 5.7    | 0.1811 | 1.8463 |
| 4/18/2019 4:38 | 0.1    | -0.25   | 2.7008 | -0.4833 | 6.6863 | 5.7    | 0.1785 | 1.8718 |
| 4/18/2019 4:39 | 0.1    | -0.7833 | 2.9412 | -0.6833 | 6.8088 | 5.7455 | 0.1724 | 1.8848 |
| 4/18/2019 4:40 | 0.1    | -0.025  | 2.7135 | -0.5    | 6.6794 | 5.8    | 0.1818 | 1.886  |
| 4/18/2019 4:41 | 0.1333 | -0.0833 | 2.1047 | -0.3167 | 6.7007 | 5.8    | 0.1668 | 1.8855 |
| 4/18/2019 4:42 | 0.1    | -0.25   | 2.6687 | -0.8167 | 6.7717 | 5.8    | 0.1726 | 1.874  |

|                |        |         |        |         |        |        |        |        |
|----------------|--------|---------|--------|---------|--------|--------|--------|--------|
| 4/18/2019 4:43 | 0.0583 | -0.35   | 2.435  | -0.9333 | 6.7254 | 5.8    | 0.1735 | 1.8765 |
| 4/18/2019 4:44 | 0      | -0.2667 | 3.0919 | -0.9333 | 6.7401 | 5.8091 | 0.1729 | 1.8825 |
| 4/18/2019 4:45 | 0      | -0.625  | 2.5408 | -0.1167 | 6.739  | 5.9    | 0.1782 | 1.8976 |
| 4/18/2019 4:46 | 0.1    | -0.25   | 3.0582 | -0.4    | 6.738  | 5.9    | 0.1646 | 1.8717 |
| 4/18/2019 4:47 | 0.1    | -0.7667 | 2.9315 | -0.3167 | 6.6333 | 5.9    | 0.1798 | 1.8693 |
| 4/18/2019 4:48 | 0.025  | 0.2     | 3.1408 | -0.6167 | 6.5998 | 5.9    | 0.1761 | 1.8861 |
| 4/18/2019 4:49 | 0      | -1.2083 | 2.9005 | -0.5667 | 6.6209 | 5.9    | 0.1725 | 1.8963 |
| 4/18/2019 4:50 | 0      | -0.5583 | 2.8355 | -0.8167 | 6.6064 | 5.9    | 0.1846 | 1.8868 |
| 4/18/2019 4:51 | 0      | 0.175   | 2.9073 | -0.9167 | 6.6113 | 5.9    | 0.1699 | 1.9019 |
| 4/18/2019 4:52 | 0      | -0.7333 | 3.1035 | -1.1167 | 6.6318 | 5.92   | 0.1772 | 1.8904 |
| 4/18/2019 4:53 | 0.0667 | 0.3667  | 2.9363 | -0.7833 | 6.6527 | 6      | 0.1743 | 1.8773 |
| 4/18/2019 4:54 | 0.1    | -0.6583 | 3.1132 | -0.4833 | 6.6839 | 6      | 0.1705 | 1.8766 |
| 4/18/2019 4:55 | 0.1    | 0.1167  | 2.7872 | -0.55   | 6.6998 | 6      | 0.1792 | 1.8695 |
| 4/18/2019 4:56 | 0.075  | -0.4417 | 3.0927 | -0.8167 | 6.6206 | 6.0667 | 0.1679 | 1.8913 |
| 4/18/2019 4:57 | 0      | -0.3417 | 3.016  | -0.1167 | 6.6674 | 6.1    | 0.1786 | 1.8858 |
| 4/18/2019 4:58 | 0      | -0.6    | 3.0613 | -0.5    | 6.6201 | 6.1091 | 0.1756 | 1.8918 |
| 4/18/2019 4:59 | 0      | -0.1917 | 3.1911 | -0.7833 | 6.6843 | 6.2    | 0.1688 | 1.8807 |
| 4/18/2019 5:00 | 0.0833 | -0.2083 | 2.7053 | -0.2333 | 6.689  | 6.2    | 0.182  | 1.8712 |
| 4/18/2019 5:01 | 0.1    | 0.0833  | 2.8836 | -0.6    | 6.6027 | 6.24   | 0.1651 | 1.8903 |
| 4/18/2019 5:02 | 0.1    | 0.05    | 2.8786 | -0.4833 | 6.6577 | 6.3    | 0.1719 | 1.8603 |
| 4/18/2019 5:03 | 0.1    | -0.25   | 3.1113 | -0.9167 | 6.7227 | 6.3    | 0.179  | 1.8538 |
| 4/18/2019 5:04 | 0.0917 | -0.2333 | 2.7937 | -0.6333 | 6.6446 | 6.3818 | 0.1616 | 1.8484 |
| 4/18/2019 5:05 | 0.0833 | -0.3    | 3.2422 | -0.4667 | 6.6199 | 6.4    | 0.174  | 1.8568 |
| 4/18/2019 5:06 | 0.1    | -0.6167 | 3.0729 | -0.5667 | 6.6427 | 6.4    | 0.1631 | 1.8213 |
| 4/18/2019 5:07 | 0.1    | -0.4583 | 3.1243 | -0.4333 | 6.6463 | 6.4    | 0.1638 | 1.8073 |
| 4/18/2019 5:08 | 0.125  | -0.8417 | 2.8342 | -0.1667 | 6.611  | 6.4    | 0.1663 | 1.8638 |
| 4/18/2019 5:09 | 0.1    | -0.2833 | 2.7703 | -0.3667 | 6.6404 | 6.4455 | 0.1558 | 1.8556 |
| 4/18/2019 5:10 | 0.1833 | -0.5167 | 3.1286 | -1.2833 | 6.6388 | 6.4909 | 0.1652 | 1.8311 |
| 4/18/2019 5:11 | 0.1583 | -0.55   | 3.1344 | 0.2667  | 6.6639 | 6.4    | 0.1562 | 1.7903 |
| 4/18/2019 5:12 | 0.15   | -0.2333 | 2.9181 | -0.6167 | 6.6228 | 6.4    | 0.156  | 1.8026 |
| 4/18/2019 5:13 | 0.2    | -0.1    | 3.0527 | 0.2333  | 6.6671 | 6.45   | 0.156  | 1.8107 |
| 4/18/2019 5:14 | 0.2917 | -0.1167 | 3.2444 | -0.0667 | 6.6898 | 6.4    | 0.1493 | 1.8012 |
| 4/18/2019 5:15 | 0.3    | -0.3    | 3.3859 | -0.9667 | 6.6933 | 6.4    | 0.1591 | 1.8232 |
| 4/18/2019 5:16 | 0.2417 | 0.5583  | 2.8969 | -0.5667 | 6.7173 | 6.4    | 0.1593 | 1.8258 |
| 4/18/2019 5:17 | 0.2    | -0.5333 | 2.9528 | -0.1833 | 6.712  | 6.4    | 0.1462 | 1.8005 |
| 4/18/2019 5:18 | 0.2    | -0.2167 | 3.1983 | -0.5833 | 6.7329 | 6.4    | 0.1577 | 1.8009 |
| 4/18/2019 5:19 | 0.2    | -0.0667 | 2.8923 | -0.2833 | 6.7128 | 6.4    | 0.1514 | 1.8255 |
| 4/18/2019 5:20 | 0.2    | 0.225   | 3.1632 | -0.7    | 6.6834 | 6.4    | 0.1478 | 1.8224 |
| 4/18/2019 5:21 | 0.2    | -0.35   | 3.1578 | -0.2333 | 6.6598 | 6.4    | 0.1583 | 1.7972 |
| 4/18/2019 5:22 | 0.2    | -0.125  | 2.9318 | -0.6667 | 6.681  | 6.3909 | 0.145  | 1.8127 |
| 4/18/2019 5:23 | 0.2167 | -0.3583 | 3.1334 | -0.45   | 6.6433 | 6.3    | 0.1469 | 1.8008 |
| 4/18/2019 5:24 | 0.225  | -0.725  | 2.9245 | -0.2167 | 6.6591 | 6.3    | 0.1528 | 1.8058 |
| 4/18/2019 5:25 | 0.2417 | -0.6    | 3.1935 | -0.4    | 6.6853 | 6.3    | 0.1424 | 1.7913 |
| 4/18/2019 5:26 | 0.275  | -0.3    | 2.9311 | -0.1333 | 6.6337 | 6.2636 | 0.1545 | 1.7883 |
| 4/18/2019 5:27 | 0.3    | -0.275  | 2.962  | -0.3167 | 6.6273 | 6.3    | 0.1483 | 1.8003 |
| 4/18/2019 5:28 | 0.3    | -0.3    | 2.9247 | -0.1    | 6.636  | 6.3    | 0.1466 | 1.7956 |
| 4/18/2019 5:29 | 0.3    | -0.1083 | 2.7205 | -0.1167 | 6.6109 | 6.2909 | 0.1534 | 1.8288 |

|                |        |         |        |         |        |        |        |        |
|----------------|--------|---------|--------|---------|--------|--------|--------|--------|
| 4/18/2019 5:30 | 0.3    | -0.5083 | 2.7115 | -0.6333 | 6.6336 | 6.2    | 0.1435 | 1.794  |
| 4/18/2019 5:31 | 0.3    | -0.15   | 2.9367 | -0.3667 | 6.6013 | 6.1083 | 0.1536 | 1.779  |
| 4/18/2019 5:32 | 0.3    | -0.2167 | 2.9447 | -0.1333 | 6.5639 | 6.1    | 0.1536 | 1.8131 |
| 4/18/2019 5:33 | 0.3    | -0.0667 | 2.8108 | -0.8167 | 6.5722 | 6.1    | 0.1461 | 1.8378 |
| 4/18/2019 5:34 | 0.3    | -0.6917 | 3.1375 | -1.1833 | 6.6398 | 6.1    | 0.16   | 1.8343 |
| 4/18/2019 5:35 | 0.3    | -0.7    | 2.8427 | -0.6667 | 6.6304 | 6.1    | 0.1527 | 1.807  |
| 4/18/2019 5:36 | 0.3    | 0.3583  | 2.9633 | -0.1833 | 6.5953 | 6.1    | 0.1544 | 1.8122 |
| 4/18/2019 5:37 | 0.3667 | 0.175   | 2.9652 | -0.75   | 6.5742 | 6.1    | 0.1648 | 1.8573 |
| 4/18/2019 5:38 | 0.4    | -0.1833 | 2.779  | -0.2    | 6.5343 | 6.1    | 0.1499 | 1.8401 |
| 4/18/2019 5:39 | 0.4    | -1.1417 | 2.7888 | -0.25   | 6.57   | 6      | 0.1705 | 1.8396 |
| 4/18/2019 5:40 | 0.3417 | -0.0083 | 2.8443 | -0.9    | 6.5395 | 6      | 0.1637 | 1.8472 |
| 4/18/2019 5:41 | 0.3    | 0.1     | 3.0593 | -0.5833 | 6.5324 | 6      | 0.155  | 1.8594 |
| 4/18/2019 5:42 | 0.3    | -0.375  | 2.9215 | -0.5833 | 6.551  | 6      | 0.1682 | 1.8498 |
| 4/18/2019 5:43 | 0.3    | -0.1167 | 2.8057 | -0.7333 | 6.5467 | 6      | 0.1623 | 1.8543 |
| 4/18/2019 5:44 | 0.2833 | 0       | 2.8572 | -0.0833 | 6.5468 | 6      | 0.1639 | 1.8464 |
| 4/18/2019 5:45 | 0.225  | -0.1583 | 2.9798 | -0.0333 | 6.5567 | 6      | 0.1692 | 1.8483 |
| 4/18/2019 5:46 | 0.2167 | 0.4     | 3.1042 | -0.1167 | 6.555  | 6      | 0.1604 | 1.8335 |
| 4/18/2019 5:47 | 0.2    | -0.275  | 2.8878 | -0.65   | 6.555  | 6      | 0.1702 | 1.8568 |
| 4/18/2019 5:48 | 0.2    | -0.2333 | 2.9185 | -0.3667 | 6.5287 | 6      | 0.1713 | 1.8606 |
| 4/18/2019 5:49 | 0.2417 | 0.4167  | 3.0353 | -0.2333 | 6.4777 | 5.9273 | 0.1686 | 1.8462 |
| 4/18/2019 5:50 | 0.3    | -0.925  | 2.9282 | -0.25   | 6.4824 | 5.9182 | 0.1772 | 1.8641 |
| 4/18/2019 5:51 | 0.2583 | -0.3333 | 3.129  | -0.35   | 6.478  | 5.9    | 0.1703 | 1.877  |
| 4/18/2019 5:52 | 0.2    | -0.2917 | 3.0808 | -0.4667 | 6.5033 | 5.9    | 0.1743 | 1.8598 |
| 4/18/2019 5:53 | 0.2    | -0.6917 | 2.5578 | -0.2167 | 6.4831 | 5.9    | 0.1666 | 1.8556 |
| 4/18/2019 5:54 | 0.2    | -0.4417 | 2.8665 | -0.2    | 6.4801 | 5.9    | 0.1628 | 1.8558 |
| 4/18/2019 5:55 | 0.2    | 0.05    | 2.7515 | 0.05    | 6.4987 | 5.9    | 0.171  | 1.8768 |
| 4/18/2019 5:56 | 0.2    | -0.2417 | 2.9185 | -0.6333 | 6.4778 | 5.9    | 0.1733 | 1.887  |
| 4/18/2019 5:57 | 0.2    | 0.725   | 2.8493 | -0.45   | 6.4768 | 5.9    | 0.1758 | 1.8926 |
| 4/18/2019 5:58 | 0.2    | -0.45   | 2.8982 | -0.5667 | 6.4725 | 5.9    | 0.186  | 1.878  |
| 4/18/2019 5:59 | 0.2    | -0.1333 | 2.8688 | -0.8167 | 6.4682 | 5.9    | 0.1708 | 1.8497 |
| 4/18/2019 6:00 | 0.2    | -0.8083 | 2.8515 | -0.2833 | 6.4773 | 5.9    | 0.1734 | 1.8261 |
| 4/18/2019 6:01 | 0.2    | -0.225  | 2.7525 | -0.05   | 6.5096 | 5.9    | 0.1779 | 1.8608 |
| 4/18/2019 6:02 | 0.2    | -0.275  | 2.8173 | -0.6167 | 6.4683 | 5.9333 | 0.1707 | 1.8864 |
| 4/18/2019 6:03 | 0.2    | 0.1333  | 2.8842 | -0.3167 | 6.4923 | 6      | 0.1847 | 1.8638 |
| 4/18/2019 6:04 | 0.1333 | 0.0083  | 2.697  | -0.4333 | 6.5443 | 6.0182 | 0.1772 | 1.8428 |
| 4/18/2019 6:05 | 0.1417 | 0.4667  | 3.1083 | -1.1333 | 6.5321 | 6.1    | 0.1756 | 1.8521 |
| 4/18/2019 6:06 | 0.1667 | 0.7     | 2.6753 | -1      | 6.5848 | 6.1    | 0.1863 | 1.8643 |
| 4/18/2019 6:07 | 0.1    | 0.1833  | 2.5143 | -0.6167 | 6.6572 | 6.1667 | 0.1756 | 1.8723 |
| 4/18/2019 6:08 | 0.1    | 0.0083  | 2.6325 | -0.6333 | 6.5919 | 6.2    | 0.1869 | 1.8787 |
| 4/18/2019 6:09 | 0.1    | 0.1833  | 2.6037 | -0.45   | 6.656  | 6.2583 | 0.1791 | 1.9039 |
| 4/18/2019 6:10 | 0.1    | -0.5333 | 2.9132 | -0.7    | 6.6988 | 6.3364 | 0.178  | 1.8665 |
| 4/18/2019 6:11 | 0.1    | 0.0583  | 2.7013 | -0.4167 | 6.7348 | 6.42   | 0.1868 | 1.847  |
| 4/18/2019 6:12 | 0.1    | -0.2    | 3.0158 | 0.0167  | 6.7468 | 6.5    | 0.1764 | 1.8785 |
| 4/18/2019 6:13 | 0.1    | 0.0333  | 2.513  | 0.0833  | 6.7909 | 6.5818 | 0.1898 | 1.8903 |
| 4/18/2019 6:14 | 0.1    | 0.0833  | 2.3878 | -0.5167 | 6.8367 | 6.6    | 0.1868 | 1.9018 |
| 4/18/2019 6:15 | 0.1    | -0.3833 | 2.966  | -0.45   | 6.8408 | 6.7    | 0.1831 | 1.9095 |
| 4/18/2019 6:16 | 0.1833 | -0.6917 | 2.0735 | -1.2667 | 6.9178 | 6.7364 | 0.1891 | 1.9288 |

|                |        |         |         |         |         |         |        |        |
|----------------|--------|---------|---------|---------|---------|---------|--------|--------|
| 4/18/2019 6:17 | 0.2    | -0.6    | 2.735   | -0.3833 | 7.0818  | 6.8364  | 0.182  | 1.8693 |
| 4/18/2019 6:18 | 0.2    | -0.8417 | 2.6975  | -0.2    | 7.0031  | 6.9     | 0.1903 | 1.8638 |
| 4/18/2019 6:19 | 0.2    | -0.1667 | 2.5145  | -0.3167 | 6.9331  | 7       | 0.1894 | 1.8866 |
| 4/18/2019 6:20 | 0.2    | -0.2083 | 2.6495  | -0.6667 | 6.9942  | 7.0111  | 0.185  | 1.911  |
| 4/18/2019 6:21 | 0.15   | -0.4    | 2.7813  | -0.1167 | 6.9951  | 7.1     | 0.1878 | 1.8871 |
| 4/18/2019 6:22 | 0.1667 | -0.075  | 3.0277  | -0.5833 | 7.0115  | 7.17    | 0.1776 | 1.8653 |
| 4/18/2019 6:23 | 0.2    | -0.9583 | 2.7447  | -0.3    | 7.0317  | 7.2     | 0.1842 | 1.8813 |
| 4/18/2019 6:24 | 0.2    | -0.1417 | 2.6658  | -0.45   | 7.0537  | 7.2909  | 0.1948 | 1.8741 |
| 4/18/2019 6:25 | 0.2    | -0.725  | 2.7747  | -0.55   | 7.0161  | 7.35    | 0.1779 | 1.8828 |
| 4/18/2019 6:26 | 0.1667 | 0.4667  | 2.49    | -0.0333 | 7.0883  | 7.4143  | 0.1898 | 1.8873 |
| 4/18/2019 6:27 | 0.2    | -1.35   | 2.5193  | -0.65   | 7.1188  | 7.5     | 0.1897 | 1.8963 |
| 4/18/2019 6:28 | 0.2    | -0.175  | 2.3722  | -0.9    | 7.1458  | 7.6167  | 0.1853 | 1.843  |
| 4/18/2019 6:29 | 0.2    | -0.0167 | 2.764   | -0.1833 | 7.1438  | 7.71    | 0.1977 | 1.8534 |
| 4/18/2019 6:30 | 0.1727 | -0.2167 | 2.5565  | -0.35   | 7.1539  | 7.8273  | 0.1831 | 1.8772 |
| 4/18/2019 6:31 | 0.1167 | 0.7917  | 3.467   | -0.3333 | 7.1921  | 7.9667  | 0.1911 | 1.8872 |
| 4/18/2019 6:32 | 0.1    | -0.1    | 2.6718  | -0.8    | 7.2221  | 8.0545  | 0.1954 | 1.8812 |
| 4/18/2019 6:33 | 0.1    | -0.1167 | 2.445   | -0.4667 | 7.2359  | 8.2182  | 0.1825 | 1.863  |
| 4/18/2019 6:34 | 0.1    | -0.6833 | 2.5032  | -0.9167 | 7.2388  | 8.3364  | 0.196  | 1.8665 |
| 4/18/2019 6:35 | 0.075  | -0.825  | 2.3683  | -0.5167 | 7.2889  | 8.4818  | 0.1862 | 1.8734 |
| 4/18/2019 6:36 | 0.1    | -0.2    | 2.9363  | -0.4667 | 7.2845  | 8.6455  | 0.1913 | 1.8821 |
| 4/18/2019 6:37 | 0.0583 | -0.9667 | 2.6637  | -0.2333 | 7.3267  | 8.8     | 0.2032 | 1.9038 |
| 4/18/2019 6:38 | 0.075  | -0.075  | 2.7548  | -1.4667 | 7.3421  | 8.975   | 0.1848 | 1.908  |
| 4/18/2019 6:39 | 0      | 0.125   | 2.575   | -0.4833 | 7.4017  | 9.1545  | 0.1948 | 1.9237 |
| 4/18/2019 6:40 | 0      | -0.6417 | 2.7035  | -0.6333 | 7.4189  | 9.35    | 0.1984 | 1.9008 |
| 4/18/2019 6:41 | 0      | -0.2333 | 2.5315  | -0.6333 | 7.4676  | 9.5818  | 0.1918 | 1.891  |
| 4/18/2019 6:42 | 0.05   | -0.3083 | 2.618   | -0.6333 | 7.4843  | 9.8     | 0.2101 | 1.8798 |
| 4/18/2019 6:43 | 0.1    | -0.075  | 2.579   | -0.4    | 7.4513  | 9.9727  | 0.1848 | 1.8848 |
| 4/18/2019 6:44 | 0.1    | -0.6417 | 2.4655  | -0.5167 | 7.4897  | 10.175  | 0.1987 | 1.8853 |
| 4/18/2019 6:45 | 0.1    | 0.2083  | 2.327   | -0.3167 | 7.6805  | 10.3917 | 0.2086 | 1.8648 |
| 4/18/2019 6:46 | 0.1    | -0.325  | 2.5408  | -0.2833 | 7.6362  | 10.6364 | 0.1997 | 1.8699 |
| 4/18/2019 6:47 | 0.1    | -0.4833 | 2.661   | -0.45   | 7.633   | 10.9167 | 0.208  | 1.8348 |
| 4/18/2019 6:48 | 0.1    | -0.2917 | 2.634   | -0.7833 | 7.633   | 11.2167 | 0.2036 | 1.8582 |
| 4/18/2019 6:49 | 0.1083 | -0.8667 | 2.3213  | -0.7167 | 7.7121  | 11.5583 | 0.218  | 1.8633 |
| 4/18/2019 6:50 | 0.2    | -0.1083 | 2.4877  | -0.65   | 7.6857  | 11.9091 | 0.2155 | 1.8781 |
| 4/18/2019 6:51 | 0.2    | 0.05    | 2.5582  | -0.7833 | 7.7327  | 12.2455 | 0.2081 | 1.9195 |
| 4/18/2019 6:52 | 0.2    | -0.0583 | 2.1105  | -0.4333 | 7.6808  | 12.5636 | 0.2189 | 1.9051 |
| 4/18/2019 6:53 | 0.2    | -0.4583 | 2.614   | -1.1667 | 7.6722  | 12.9083 | 0.2171 | 1.9132 |
| 4/18/2019 6:54 | 0.2    | -0.5167 | 2.5503  | -0.85   | 7.6951  | 13.1556 | 0.2069 | 1.9005 |
| 4/18/2019 6:55 | 0.2    | -0.2083 | 2.4827  | -0.8333 | 7.6163  | 13.5182 | 0.2198 | 1.9369 |
| 4/18/2019 6:56 | 0.2    | -0.25   | 2.516   | -0.6333 | 7.6287  | 13.8583 | 0.2128 | 1.9358 |
| 4/18/2019 6:57 | 0.2083 | -0.6    | 2.6388  | -0.7333 | 7.6546  | 14.2091 | 0.2217 | 1.9613 |
| 4/18/2019 6:58 | 0.2    | -0.15   | 2.5185  | -0.4333 | 7.6879  | 14.3909 | 0.2201 | 1.9618 |
| 4/18/2019 6:59 | 0.2    | 0.0167  | 2.492   | -0.9333 | 7.6353  | 14.5667 | 0.2123 | 1.9323 |
| 4/18/2019 7:00 | 0.2    | -0.375  | 2.9518  | -0.65   | 7.5523  | 14.71   | 0.2215 | 1.9646 |
| 4/18/2019 7:01 | 0.2    | -0.2667 | 4.533   | -0.8    | 11.4062 | 15.6583 | 0.2756 | 1.9765 |
| 4/18/2019 7:02 | 0.2    | 0.1667  | 6.1736  | -0.35   | 17.3954 | 22.31   | 0.4835 | 1.9822 |
| 4/18/2019 7:03 | 0.1333 | -0.725  | 12.3898 | -0.4    | 20.8208 | 77.5167 | 2.2104 | 2.1276 |

|                |        |         |         |         |         |         |        |        |
|----------------|--------|---------|---------|---------|---------|---------|--------|--------|
| 4/18/2019 7:04 | 0.1    | -0.1167 | 10.473  | -1.2    | 18.321  | 59.2727 | 1.5613 | 2.0699 |
| 4/18/2019 7:05 | 0.1833 | -0.425  | 11.8783 | -0.65   | 20.452  | 58.4583 | 1.6664 | 2.0873 |
| 4/18/2019 7:06 | 0.15   | -0.1    | 11.03   | -0.35   | 19.5597 | 59.2909 | 1.6267 | 2.0745 |
| 4/18/2019 7:07 | 0.1167 | -0.0417 | 10.8042 | -0.1333 | 19.0188 | 59.1909 | 1.5759 | 2.0764 |
| 4/18/2019 7:08 | 0.1    | -0.2583 | 10.9308 | -0.6    | 19.3429 | 59.68   | 1.4281 | 2.0831 |
| 4/18/2019 7:09 | 0.1    | -0.1333 | 10.7517 | -0.0833 | 19.2928 | 58.8583 | 1.3754 | 2.0928 |
| 4/18/2019 7:10 | 0.1    | -0.1583 | 10.6483 | -0.05   | 18.8466 | 57.4455 | 1.2916 | 2.0928 |
| 4/18/2019 7:11 | 0.1    | -0.25   | 10.5292 | 0.3333  | 18.6068 | 56.4917 | 1.2513 | 2.1105 |
| 4/18/2019 7:12 | 0.1    | 0.675   | 10.3875 | -0.3    | 18.462  | 56.9    | 1.2423 | 2.1159 |
| 4/18/2019 7:13 | 0.1    | 0.0833  | 10.3825 | -0.95   | 18.3258 | 56.9417 | 1.2354 | 2.0952 |
| 4/18/2019 7:14 | 0.1    | -0.85   | 10.7175 | -0.9333 | 18.5328 | 57.58   | 1.2528 | 2.1041 |
| 4/18/2019 7:15 | 0.1    | -0.175  | 10.2264 | -0.55   | 18.4353 | 57.3167 | 1.2653 | 2.1244 |
| 4/18/2019 7:16 | 0.1    | -0.675  | 9.2743  | -0.3833 | 17.6995 | 57.2636 | 1.2022 | 2.1188 |
| 4/18/2019 7:17 | 0.1    | -0.7583 | 9.1526  | -0.9    | 17.6736 | 57.1833 | 1.1899 | 2.1328 |
| 4/18/2019 7:18 | 0.1    | -0.2833 | 8.9361  | -0.8    | 17.3628 | 57.0636 | 1.1689 | 2.1077 |
| 4/18/2019 7:19 | 0.1    | -0.1833 | 9.1047  | -0.6833 | 17.6804 | 56.9273 | 1.2028 | 2.1151 |
| 4/18/2019 7:20 | 0.175  | -0.8667 | 9.3039  | -0.4833 | 17.6826 | 56.8182 | 1.2289 | 2.1487 |
| 4/18/2019 7:21 | 0.2    | -0.4667 | 8.7714  | -0.95   | 17.2908 | 56.7333 | 1.1843 | 2.1543 |
| 4/18/2019 7:22 | 0.1583 | -0.1    | 8.9307  | -0.2167 | 17.1683 | 56.6182 | 1.1737 | 2.1541 |
| 4/18/2019 7:23 | 0.1    | 0.175   | 8.9344  | -0.2167 | 17.289  | 56.5333 | 1.2006 | 2.1611 |
| 4/18/2019 7:24 | 0.1    | -0.1667 | 8.3079  | 0.0667  | 16.987  | 56.36   | 1.1685 | 2.1727 |
| 4/18/2019 7:25 | 0.1    | 0.3583  | 8.6842  | -0.4167 | 16.7473 | 56.1833 | 1.1599 | 2.1743 |
| 4/18/2019 7:26 | 0.1    | -0.6    | 8.2771  | -0.7333 | 16.7146 | 56.0091 | 1.1547 | 2.1634 |
| 4/18/2019 7:27 | 0.1    | 0.3583  | 8.3652  | 0.2833  | 16.7789 | 55.85   | 1.1589 | 2.1553 |
| 4/18/2019 7:28 | 0.0417 | -0.3833 | 8.3344  | -0.6    | 16.6618 | 55.7636 | 1.174  | 2.1473 |
| 4/18/2019 7:29 | 0.0333 | -0.3833 | 7.6171  | -0.1167 | 16.2088 | 55.6583 | 1.1333 | 2.1227 |
| 4/18/2019 7:30 | 0.1    | -0.05   | 7.4836  | -0.1833 | 16.0663 | 55.58   | 1.1288 | 2.1162 |
| 4/18/2019 7:31 | 0.1917 | -0.125  | 7.6293  | -0.4167 | 16.0329 | 55.4917 | 1.1303 | 2.1029 |
| 4/18/2019 7:32 | 0.2    | -1.05   | 7.8574  | -0.5167 | 16.2209 | 55.3182 | 1.135  | 2.1218 |
| 4/18/2019 7:33 | 0.1    | -0.1667 | 7.7553  | -0.4167 | 16.1228 | 55.2083 | 1.1378 | 2.1507 |
| 4/18/2019 7:34 | 0.0333 | 0.15    | 7.5409  | -0.45   | 15.8473 | 55.13   | 1.1187 | 2.1598 |
| 4/18/2019 7:35 | 0      | -0.4917 | 7.6499  | -1.1167 | 15.6679 | 54.9364 | 1.0928 | 2.1598 |
| 4/18/2019 7:36 | 0      | -1.2167 | 7.1747  | -0.5667 | 15.5378 | 54.71   | 1.1021 | 2.1625 |
| 4/18/2019 7:37 | 0      | -0.5417 | 6.9656  | 0.0667  | 15.4398 | 54.5333 | 1.0739 | 2.1778 |
| 4/18/2019 7:38 | 0.075  | 0.5583  | 7.4048  | -0.8167 | 15.4796 | 54.49   | 1.0947 | 2.1943 |
| 4/18/2019 7:39 | 0.1    | -0.6167 | 7.0914  | -0.8667 | 15.3301 | 54.3667 | 1.0779 | 2.173  |
| 4/18/2019 7:40 | 0.1    | -0.4    | 6.9314  | -0.4333 | 15.116  | 54.2    | 1.0548 | 2.1583 |
| 4/18/2019 7:41 | 0.1    | -0.5917 | 6.8348  | -0.15   | 14.9902 | 54.0455 | 1.067  | 2.1618 |
| 4/18/2019 7:42 | 0.1    | -0.1083 | 7.0158  | -0.8833 | 15.0357 | 53.9091 | 1.0614 | 2.159  |
| 4/18/2019 7:43 | 0.1    | -0.7333 | 6.92    | 0.0833  | 14.9043 | 53.7546 | 1.0543 | 2.1649 |
| 4/18/2019 7:44 | 0.1    | -0.2417 | 6.5593  | -0.4833 | 14.8573 | 53.68   | 1.0647 | 2.1407 |
| 4/18/2019 7:45 | 0.1    | -0.7167 | 6.5841  | -0.7833 | 14.6076 | 53.48   | 1.033  | 2.1064 |
| 4/18/2019 7:46 | 0.1    | -0.2    | 6.0294  | -0.0167 | 14.4923 | 53.15   | 1.0162 | 2.1249 |
| 4/18/2019 7:47 | 0.0917 | -0.3333 | 6.4081  | -0.8833 | 14.5468 | 53      | 1.0502 | 2.1687 |
| 4/18/2019 7:48 | 0.1    | -1.125  | 6.4029  | -0.3167 | 14.5261 | 52.9    | 1.0337 | 2.143  |
| 4/18/2019 7:49 | 0.025  | -0.1917 | 6.3923  | -0.1333 | 14.525  | 52.8417 | 1.0178 | 2.1495 |
| 4/18/2019 7:50 | 0.0917 | 0.0917  | 6.2968  | -0.4333 | 14.3358 | 52.625  | 1.02   | 2.1734 |



|                |        |         |        |         |         |         |        |        |
|----------------|--------|---------|--------|---------|---------|---------|--------|--------|
| 4/18/2019 7:51 | 0.1    | -0.4833 | 6.2263 | -0.3667 | 14.1035 | 52.4909 | 1.0192 | 2.166  |
| 4/18/2019 7:52 | 0.1    | -0.175  | 6.3071 | -0.7    | 14.122  | 52.325  | 1.0242 | 2.1728 |
| 4/18/2019 7:53 | 0.1    | 0.1667  | 6.0434 | -0.15   | 14.0395 | 52.15   | 1.0003 | 2.185  |
| 4/18/2019 7:54 | 0.1083 | -0.7917 | 6.2278 | -0.2    | 13.888  | 52.025  | 1.0069 | 2.2107 |
| 4/18/2019 7:55 | 0.125  | 0.0417  | 6.2008 | 0.0333  | 13.7618 | 51.81   | 0.988  | 2.1986 |
| 4/18/2019 7:56 | 0.1333 | -0.6083 | 5.8016 | -0.1833 | 13.6863 | 51.525  | 0.9817 | 2.1582 |
| 4/18/2019 7:57 | 0.1    | -0.7833 | 5.7972 | 0.0333  | 13.7399 | 51.36   | 0.9958 | 2.1906 |
| 4/18/2019 7:58 | 0.1    | 0.1417  | 5.7835 | -0.0667 | 13.7268 | 51.275  | 0.9875 | 2.1998 |
| 4/18/2019 7:59 | 0.15   | 0.0333  | 6.0604 | -0.1333 | 13.5951 | 51.12   | 0.9833 | 2.1722 |
| 4/18/2019 8:00 | 0.1917 | 0.05    | 5.8306 | -0.2833 | 13.4743 | 50.9545 | 0.9814 | 2.142  |
| 4/18/2019 8:01 | 0.2    | -0.5583 | 5.7458 | -0.2333 | 13.3503 | 50.7417 | 0.9434 | 2.1431 |
| 4/18/2019 8:02 | 0.1167 | -0.55   | 5.6492 | -0.65   | 13.3209 | 50.4636 | 0.9657 | 2.1606 |
| 4/18/2019 8:03 | 0.1    | -0.5917 | 5.7193 | -0.5333 | 13.3232 | 50.1833 | 0.9599 | 2.17   |
| 4/18/2019 8:04 | 0.025  | -0.65   | 5.7587 | -0.5333 | 13.243  | 49.9583 | 0.9548 | 2.2118 |
| 4/18/2019 8:05 | 0.075  | -0.675  | 5.4778 | -0.45   | 13.0698 | 49.7    | 0.9634 | 2.1905 |
| 4/18/2019 8:06 | 0.1    | -0.2417 | 5.4653 | 0.2833  | 13.1015 | 49.5333 | 0.9327 | 2.2212 |
| 4/18/2019 8:07 | 0.1583 | 0.2833  | 5.2809 | -0.8833 | 12.9728 | 49.4    | 0.9292 | 2.1926 |
| 4/18/2019 8:08 | 0.2    | -0.3667 | 5.5574 | -0.7333 | 13.0373 | 49.2091 | 0.9332 | 2.17   |
| 4/18/2019 8:09 | 0.2    | -0.35   | 5.6424 | -0.75   | 12.9759 | 49.0636 | 0.9348 | 2.1784 |
| 4/18/2019 8:10 | 0.2    | -0.5667 | 5.5923 | -0.45   | 12.8267 | 48.9182 | 0.9389 | 2.1835 |
| 4/18/2019 8:11 | 0.2    | -0.45   | 5.3311 | -0.9833 | 12.7282 | 48.6583 | 0.9136 | 2.2165 |
| 4/18/2019 8:12 | 0.1417 | 0.1083  | 4.9132 | -0.6    | 12.7224 | 48.35   | 0.9102 | 2.1988 |
| 4/18/2019 8:13 | 0.2    | 0.3417  | 4.8531 | -0.4    | 12.6659 | 48.1667 | 0.9046 | 2.1749 |
| 4/18/2019 8:14 | 0.1833 | 0.05    | 4.9585 | -0.25   | 12.594  | 48.0455 | 0.911  | 2.1919 |
| 4/18/2019 8:15 | 0.125  | -0.75   | 5.1633 | -0.95   | 12.5693 | 47.8818 | 0.9026 | 2.2144 |
| 4/18/2019 8:16 | 0.1    | 0.1167  | 4.9277 | -0.55   | 12.5375 | 47.7445 | 0.9064 | 2.2188 |
| 4/18/2019 8:17 | 0.1    | -0.375  | 5.046  | -0.4167 | 12.4482 | 47.5182 | 0.8888 | 2.1843 |
| 4/18/2019 8:18 | 0.0917 | -0.675  | 4.7905 | -0.2667 | 12.4078 | 47.2546 | 0.8925 | 2.2309 |
| 4/18/2019 8:19 | 0.075  | -0.4417 | 4.8823 | -0.95   | 12.4322 | 47.05   | 0.8906 | 2.2483 |
| 4/18/2019 8:20 | 0.1    | -0.6333 | 4.9502 | -0.7167 | 12.4058 | 46.9625 | 0.8856 | 2.2943 |
| 4/18/2019 8:21 | 0.1417 | -0.1833 | 4.9242 | -0.4167 | 12.321  | 46.7273 | 0.8924 | 2.2647 |
| 4/18/2019 8:22 | 0.1917 | -0.3833 | 4.8865 | -0.1333 | 12.3435 | 46.54   | 0.8704 | 2.2309 |
| 4/18/2019 8:23 | 0.2    | -1.4417 | 4.7797 | -0.5833 | 12.2178 | 46.3546 | 0.8676 | 2.2529 |
| 4/18/2019 8:24 | 0.2    | 0.2833  | 5.0358 | -0.5667 | 12.1768 | 46.28   | 0.8755 | 2.2669 |
| 4/18/2019 8:25 | 0.2    | -0.4    | 4.9983 | -0.4833 | 12.1655 | 46.1091 | 0.8622 | 2.2728 |
| 4/18/2019 8:26 | 0.2    | -0.6417 | 4.9142 | -0.8833 | 12.1339 | 45.8727 | 0.8566 | 2.2675 |
| 4/18/2019 8:27 | 0.2    | -0.3583 | 4.733  | -0.25   | 12.0862 | 45.6091 | 0.852  | 2.2808 |
| 4/18/2019 8:28 | 0.15   | -0.3167 | 4.7206 | -1.2833 | 12.0953 | 45.4083 | 0.839  | 2.2988 |
| 4/18/2019 8:29 | 0.1    | -0.8333 | 4.4893 | -0.4833 | 11.973  | 45.275  | 0.8429 | 2.2638 |
| 4/18/2019 8:30 | 0.1083 | -0.2583 | 4.6014 | -0.7667 | 12.0008 | 45.125  | 0.8469 | 2.2303 |
| 4/18/2019 8:31 | 0.1583 | 0.1833  | 4.784  | 0       | 12.0172 | 44.9545 | 0.8267 | 2.2089 |
| 4/18/2019 8:32 | 0.1    | -0.5583 | 4.7077 | -1.1833 | 11.8188 | 44.8091 | 0.8463 | 2.2367 |
| 4/18/2019 8:33 | 0.1    | -0.6917 | 4.3248 | -0.7333 | 11.8953 | 44.61   | 0.8091 | 2.2403 |
| 4/18/2019 8:34 | 0.1    | -0.15   | 4.1032 | -0.2167 | 12.0828 | 44.4091 | 0.7977 | 2.2468 |
| 4/18/2019 8:35 | 0.2    | 0.225   | 4.4275 | -0.45   | 13.4549 | 43.9273 | 0.7577 | 2.2838 |
| 4/18/2019 8:36 | 0.2    | -0.6    | 4.5347 | -0.7167 | 12.5138 | 43.6455 | 0.8058 | 2.274  |
| 4/18/2019 8:37 | 0.3    | -0.025  | 4.342  | -0.4833 | 14.0811 | 43.1273 | 0.7484 | 2.2597 |

|                |        |         |         |         |         |          |        |        |
|----------------|--------|---------|---------|---------|---------|----------|--------|--------|
| 4/18/2019 8:38 | 0.2833 | -0.325  | 4.0223  | -0.5333 | 15.0998 | 42.4167  | 0.7009 | 2.2331 |
| 4/18/2019 8:39 | 0.3333 | 0.3     | 3.9487  | 0.0333  | 16.0312 | 41.5     | 0.652  | 2.2148 |
| 4/18/2019 8:40 | 0.4273 | 0.175   | 3.5223  | 0.2333  | 17.116  | 40.375   | 0.6252 | 2.1908 |
| 4/18/2019 8:41 | 0.5    | 0.1333  | 3.2798  | 0.2833  | 17.7269 | 39.12    | 0.5815 | 2.1591 |
| 4/18/2019 8:42 | 0.5417 | 0.45    | 3.4322  | -0.0167 | 18.0313 | 37.6727  | 0.582  | 2.149  |
| 4/18/2019 8:43 | 0.5417 | 0.175   | 3.0832  | 0.45    | 19.1546 | 36.22    | 0.5303 | 2.139  |
| 4/18/2019 8:44 | 0.525  | 0.3917  | 2.6138  | -0.1    | 19.6757 | 34.4636  | 0.5078 | 2.1267 |
| 4/18/2019 8:45 | 0.6    | -0.1167 | 2.8333  | 0.7     | 20.3156 | 32.65    | 0.4869 | 2.1088 |
| 4/18/2019 8:46 | 0.6    | 0.25    | 2.8633  | 0.2     | 20.5143 | 30.725   | 0.4777 | 2.109  |
| 4/18/2019 8:47 | 0.7    | -0.2333 | 2.806   | -0.05   | 20.9998 | 28.8636  | 0.4504 | 2.0864 |
| 4/18/2019 8:48 | 0.7    | 0.95    | 2.9775  | 0.2167  | 21.4051 | 26.95    | 0.4504 | 2.0819 |
| 4/18/2019 8:49 | 0.7    | 0.5333  | 2.8548  | 0.4667  | 21.6276 | 25.0083  | 0.4109 | 2.0422 |
| 4/18/2019 8:50 | 0.75   | 0.7417  | 3.0143  | 0       | 21.633  | 23.31    | 0.4062 | 2.0249 |
| 4/18/2019 8:51 | 0.8    | 0.9167  | 2.597   | 0.4667  | 21.7587 | 21.9091  | 0.4113 | 2.0551 |
| 4/18/2019 8:52 | 0.8    | 0.4917  | 2.5968  | 0.7167  | 22.2108 | 20.4364  | 0.3843 | 2.0535 |
| 4/18/2019 8:53 | 0.8    | 0.875   | 2.4667  | 0.35    | 22.4546 | 19.2583  | 0.3863 | 2.0339 |
| 4/18/2019 8:54 | 0.8333 | 1.225   | 2.6548  | 0.7833  | 22.5865 | 18       | 0.3615 | 2.0118 |
| 4/18/2019 8:55 | 0.925  | 1.2083  | 2.4977  | 1       | 22.6354 | 16.9     | 0.362  | 1.9768 |
| 4/18/2019 8:56 | 1      | 1.4833  | 2.7447  | 1.05    | 22.7858 | 15.8455  | 0.3583 | 1.9801 |
| 4/18/2019 8:57 | 1.075  | 1.0667  | 2.7315  | 1.15    | 22.7777 | 15       | 0.342  | 1.9701 |
| 4/18/2019 8:58 | 1.1    | 1.3417  | 2.9933  | 1.0167  | 22.8636 | 14.2091  | 0.3525 | 1.9515 |
| 4/18/2019 8:59 | 1.2    | 1.2167  | 2.89    | 1.0833  | 22.9023 | 13.5273  | 0.354  | 1.9767 |
| 4/18/2019 9:00 | 1.2917 | 1.95    | 2.574   | 0.7667  | 22.8268 | 12.8667  | 0.3382 | 1.9382 |
| 4/18/2019 9:01 | 1.3333 | 1.8417  | 3.0948  | 1.1     | 22.8543 | 12.275   | 0.3398 | 1.941  |
| 4/18/2019 9:02 | 1.3    | 1.3083  | 2.856   | 1.05    | 22.8558 | 11.7546  | 0.3385 | 1.9243 |
| 4/18/2019 9:03 | 1.3    | 0.8583  | 2.9672  | 0.8333  | 22.9454 | 11.2182  | 0.3266 | 1.9062 |
| 4/18/2019 9:04 | 1.375  | 1.4333  | 2.8605  | 1       | 23.0833 | 10.7     | 0.3306 | 1.8825 |
| 4/18/2019 9:05 | 1.4    | 0.975   | 2.831   | 0.9333  | 23.0863 | 10.1546  | 0.3212 | 1.8821 |
| 4/18/2019 9:06 | 1.3083 | 1.225   | 2.6145  | 1.05    | 23.1196 | 9.775    | 0.3162 | 1.8935 |
| 4/18/2019 9:07 | 1.125  | 1.4083  | 2.3062  | 0.55    | 23.1134 | 9.4      | 0.3226 | 1.9132 |
| 4/18/2019 9:08 | 0.9083 | 0.8583  | 2.455   | 0.5667  | 23.0658 | 9.0364   | 0.3226 | 1.922  |
| 4/18/2019 9:09 | 0.7417 | 0.3417  | 2.2273  | -0.0167 | 23.1243 | 8.7455   | 0.3229 | 1.9548 |
| 4/18/2019 9:10 | 0.6273 | -0.0083 | 2.076   | 0.0167  | 23.0622 | 8.45     | 0.3302 | 1.9678 |
| 4/18/2019 9:11 | 0.5917 | -0.0167 | 2.131   | 0.6667  | 22.9778 | 8.2273   | 0.3193 | 1.9677 |
| 4/18/2019 9:12 | 0.5    | 0.4333  | 1.972   | -0.35   | 22.8778 | 8.0556   | 0.335  | 1.976  |
| 4/18/2019 9:13 | 0.4333 | 0.0583  | 1.8473  | -0.2833 | 22.8623 | 7.8636   | 0.3354 | 1.9727 |
| 4/18/2019 9:14 | 0.4    | -0.3    | 1.9015  | -0.0167 | 22.7746 | 7.7455   | 0.3273 | 1.9857 |
| 4/18/2019 9:15 | 0.4    | -0.3583 | 2.012   | -0.6833 | 22.9078 | 7.65     | 0.3381 | 2.0014 |
| 4/18/2019 9:16 | 0.3167 | 0.125   | 3.6877  | -0.0167 | 28.5683 | 8.39     | 0.3791 | 2.0469 |
| 4/18/2019 9:17 | 0.2833 | -0.0167 | 34.2    | 0.9667  | 45.3118 | 13.7833  | 0.9802 | 2.2928 |
| 4/18/2019 9:18 | 0.2    | -0.3667 | 44.4133 | 1.4167  | 60.2518 | 61.04    | 1.2877 | 2.3973 |
| 4/18/2019 9:19 | 0.2    | -0.2583 | 53.1483 | 1.6667  | 62.3835 | 77.0364  | 1.4945 | 2.4399 |
| 4/18/2019 9:20 | 0.1833 | 0.6417  | 65.7567 | 1.95    | 66.5143 | 83.3636  | 1.7597 | 2.5385 |
| 4/18/2019 9:21 | 0.2    | -0.225  | 68.71   | 1.9     | 68.8968 | 89.0583  | 1.8787 | 2.5971 |
| 4/18/2019 9:22 | 0.2    | -0.4083 | 75.1917 | 1.8333  | 70.8758 | 93.4     | 2.1312 | 2.6716 |
| 4/18/2019 9:23 | 0.2    | -0.1917 | 76.2667 | 1.75    | 71.3281 | 95.175   | 2.213  | 2.7153 |
| 4/18/2019 9:24 | 0.1083 | 0.3833  | 86.35   | 2.7833  | 73.9398 | 105.8909 | 3.0753 | 2.9111 |

|                 |        |         |         |         |         |          |        |        |
|-----------------|--------|---------|---------|---------|---------|----------|--------|--------|
| 4/18/2019 9:25  | 0.1    | 0.1917  | 92.5133 | 1.6833  | 75.1908 | 119.375  | 4.32   | 3.2035 |
| 4/18/2019 9:26  | 0.1    | -0.3333 | 85.625  | 1.4833  | 73.6572 | 112.5091 | 3.611  | 2.9829 |
| 4/18/2019 9:27  | 0.1917 | 0.5333  | 80.4667 | 1.8333  | 70.0694 | 107.7833 | 4.0732 | 2.9807 |
| 4/18/2019 9:28  | 0.2    | 0.5417  | 78.99   | 1.55    | 69.2136 | 105.4727 | 3.9338 | 2.9738 |
| 4/18/2019 9:29  | 0.2    | -0.2    | 76.8717 | 2.0833  | 68.2656 | 107.7917 | 4.1407 | 2.9601 |
| 4/18/2019 9:30  | 0.2    | -0.7167 | 74.1967 | 1.5833  | 66.9718 | 107.4455 | 4.5538 | 2.9933 |
| 4/18/2019 9:31  | 0.2    | -0.3167 | 72.1967 | 1.1333  | 65.6195 | 107.1583 | 4.2872 | 2.95   |
| 4/18/2019 9:32  | 0.2    | -0.4667 | 71.9733 | 0.9     | 65.4157 | 106.8917 | 4.2457 | 2.9519 |
| 4/18/2019 9:33  | 0.2    | -0.175  | 72.005  | 0.5167  | 65.5986 | 106.6364 | 4.3127 | 2.9527 |
| 4/18/2019 9:34  | 0.1583 | -0.2583 | 70.7433 | 1.1667  | 64.8307 | 106.2667 | 4.3168 | 2.9363 |
| 4/18/2019 9:35  | 0.1    | -0.0667 | 68.13   | 0.8833  | 63.756  | 105.9636 | 4.2885 | 2.938  |
| 4/18/2019 9:36  | 0.1083 | 0.1833  | 67.4483 | 1.1333  | 63.1215 | 105.5273 | 4.0717 | 2.9476 |
| 4/18/2019 9:37  | 0.1    | 0.0667  | 67.3533 | 1.2167  | 62.918  | 105.1545 | 4.0683 | 2.9622 |
| 4/18/2019 9:38  | 0.1    | -0.3583 | 65.635  | 0.6167  | 62.1266 | 104.7545 | 4.233  | 3.0069 |
| 4/18/2019 9:39  | 0.1083 | -0.4833 | 63.0833 | 1.1     | 60.074  | 104.1455 | 4.2263 | 2.9747 |
| 4/18/2019 9:40  | 0.1545 | 0.175   | 63.0367 | 0.5833  | 60.2646 | 103.65   | 4.4423 | 2.9677 |
| 4/18/2019 9:41  | 0.1    | -0.2417 | 61.8867 | 1.5167  | 59.5696 | 103.1167 | 4.2445 | 2.9294 |
| 4/18/2019 9:42  | 0.1    | -0.6167 | 61.1683 | 0.6833  | 59.0364 | 102.5818 | 4.1098 | 2.9533 |
| 4/18/2019 9:43  | 0.1    | 0.1     | 60.7383 | 0.6833  | 58.6699 | 102.3083 | 4.1357 | 2.9625 |
| 4/18/2019 9:44  | 0.1083 | -0.125  | 57.755  | 0.8167  | 56.7449 | 101.8333 | 4.1029 | 2.923  |
| 4/18/2019 9:45  | 0.1    | -1.1083 | 56.3683 | 0.9167  | 55.8288 | 101.1818 | 3.9323 | 2.8968 |
| 4/18/2019 9:46  | 0.0167 | -0.15   | 55.2883 | 0.2667  | 54.8368 | 100.45   | 4.0219 | 2.8716 |
| 4/18/2019 9:47  | 0.0167 | 0.2417  | 54.9033 | 0.3167  | 54.5348 | 99.8546  | 4.1231 | 2.8988 |
| 4/18/2019 9:48  | 0.1    | -0.4167 | 54.2967 | 1.0333  | 54.1026 | 99.2546  | 4.0158 | 2.9408 |
| 4/18/2019 9:49  | 0.1333 | -0.0083 | 53.27   | 0.5167  | 53.5674 | 98.68    | 3.9599 | 2.9108 |
| 4/18/2019 9:50  | 0.2    | -0.425  | 51.9783 | -0.0333 | 52.8048 | 97.9364  | 3.9593 | 2.9092 |
| 4/18/2019 9:51  | 0.2    | -0.4083 | 51.2867 | 0.5667  | 52.833  | 97.45    | 3.9004 | 2.9009 |
| 4/18/2019 9:52  | 0.175  | -0.5917 | 50.4867 | 0.7167  | 52.7053 | 96.8     | 3.9775 | 2.9013 |
| 4/18/2019 9:53  | 0.0917 | -0.5333 | 49.8317 | 0.15    | 50.9916 | 96       | 3.9063 | 2.9063 |
| 4/18/2019 9:54  | 0      | 0.1417  | 49.3583 | 0.5333  | 50.1502 | 95.3333  | 3.8579 | 2.9107 |
| 4/18/2019 9:55  | 0      | 0.0167  | 48.535  | 0.0833  | 49.7073 | 94.7667  | 3.8063 | 2.9256 |
| 4/18/2019 9:56  | 0      | -0.1833 | 47.39   | 0.05    | 48.6338 | 94.0583  | 3.7753 | 2.8792 |
| 4/18/2019 9:57  | 0.0083 | -0.275  | 47.76   | 0.8     | 49.1748 | 93.57    | 3.7977 | 2.8859 |
| 4/18/2019 9:58  | 0.1    | -0.05   | 46.0317 | 0.5667  | 47.4668 | 93.2     | 3.7099 | 2.8843 |
| 4/18/2019 9:59  | 0.1    | 0.2167  | 45.875  | 0.8333  | 47.4834 | 92.66    | 3.7147 | 2.906  |
| 4/18/2019 10:00 | 0.1083 | 0.625   | 45.6583 | 0.3     | 47.3009 | 92.0583  | 3.6823 | 2.8999 |
| 4/18/2019 10:01 | 0.1    | 0.4     | 44.2492 | 0.6     | 46.4521 | 91.46    | 3.6398 | 2.8704 |
| 4/18/2019 10:02 | 0.1    | 0.6833  | 44.09   | 0.75    | 46.1523 | 90.9333  | 3.6477 | 2.8375 |
| 4/18/2019 10:03 | 0.1    | 0.05    | 43.2    | 0.2833  | 45.4539 | 90.24    | 3.5993 | 2.8681 |
| 4/18/2019 10:04 | 0.1    | -0.3917 | 42.7517 | 0.5167  | 44.9617 | 89.525   | 3.5845 | 2.8786 |
| 4/18/2019 10:05 | 0.1    | 0.1083  | 42.9642 | 0.3167  | 44.9945 | 89.11    | 3.6019 | 2.8724 |
| 4/18/2019 10:06 | 0.1    | -0.4833 | 40.4767 | 0.0833  | 43.3009 | 88.425   | 3.4647 | 2.8613 |
| 4/18/2019 10:07 | 0.0083 | -0.325  | 41.3192 | -0.3333 | 43.1463 | 87.7364  | 3.5027 | 2.8764 |
| 4/18/2019 10:08 | 0.0083 | 0.0083  | 40.7067 | 0.1333  | 42.9492 | 87.1083  | 3.4828 | 2.8914 |
| 4/18/2019 10:09 | 0.0417 | -0.2417 | 40.8433 | 0.5333  | 43.0922 | 86.64    | 3.5099 | 2.9243 |
| 4/18/2019 10:10 | 0.0667 | 0.15    | 39.89   | 0.05    | 42.3376 | 86.1273  | 3.4733 | 2.9039 |
| 4/18/2019 10:11 | 0.0583 | -0.2333 | 38.8725 | 0.0667  | 41.3932 | 85.66    | 3.4156 | 2.8812 |

|                 |        |         |         |         |         |         |        |        |
|-----------------|--------|---------|---------|---------|---------|---------|--------|--------|
| 4/18/2019 10:12 | 0.1    | -0.1417 | 37.4967 | 0.4833  | 40.4111 | 85.02   | 3.3544 | 2.8575 |
| 4/18/2019 10:13 | 0.1    | -0.25   | 38.26   | -0.05   | 40.9553 | 84.4455 | 3.4036 | 2.8793 |
| 4/18/2019 10:14 | 0.1083 | 0.025   | 37.3775 | 0.05    | 40.0196 | 83.8    | 3.3373 | 2.8705 |
| 4/18/2019 10:15 | 0.1    | 0.2083  | 36.7208 | 0.15    | 39.5953 | 83.2182 | 3.3327 | 2.8818 |
| 4/18/2019 10:16 | 0.1333 | -0.0583 | 36.9708 | 0.3     | 39.2141 | 82.7667 | 3.2968 | 2.869  |
| 4/18/2019 10:17 | 0.1    | -0.3167 | 36.0308 | 0.5667  | 38.8688 | 82.2    | 3.2826 | 2.8541 |
| 4/18/2019 10:18 | 0.1    | -0.3667 | 35.7425 | 0.2833  | 38.4894 | 81.6    | 3.2789 | 2.8621 |
| 4/18/2019 10:19 | 0.1    | -0.4167 | 34.9692 | -0.1    | 37.954  | 81.19   | 3.2387 | 2.8283 |
| 4/18/2019 10:20 | 0.1182 | -0.1833 | 34.3292 | 0.1333  | 37.4966 | 80.6083 | 3.2313 | 2.8611 |
| 4/18/2019 10:21 | 0.1333 | -0.4667 | 34.905  | 0.4833  | 37.4783 | 80.0455 | 3.2275 | 2.8437 |
| 4/18/2019 10:22 | 0.1    | -0.2083 | 34.1742 | 0.0333  | 36.8128 | 79.3667 | 3.1974 | 2.8174 |
| 4/18/2019 10:23 | 0.1667 | -0.4917 | 33.4492 | 0.2333  | 36.4118 | 78.7091 | 3.1734 | 2.8065 |
| 4/18/2019 10:24 | 0.2    | -0.2    | 33.8608 | 0.4667  | 36.5163 | 78.2083 | 3.1733 | 2.8314 |
| 4/18/2019 10:25 | 0.2    | -0.225  | 33.3167 | 0.5667  | 35.7479 | 77.6091 | 3.1403 | 2.8357 |
| 4/18/2019 10:26 | 0.2    | 0.2167  | 33.0642 | 0.5167  | 35.6039 | 77.0833 | 3.1175 | 2.8303 |
| 4/18/2019 10:27 | 0.2    | 0.1917  | 32.6708 | 0       | 35.3618 | 76.65   | 3.1144 | 2.8612 |
| 4/18/2019 10:28 | 0.1083 | -0.4667 | 32.1975 | 0.4167  | 34.8846 | 76.3083 | 3.1164 | 2.8573 |
| 4/18/2019 10:29 | 0.1    | -0.4583 | 31.8142 | 0.1833  | 34.3804 | 75.79   | 3.0668 | 2.8315 |
| 4/18/2019 10:30 | 0.1    | -0.025  | 30.9175 | 0.4     | 33.9335 | 75.2667 | 3.0482 | 2.8198 |
| 4/18/2019 10:31 | 0.1583 | -0.05   | 30.9125 | 0.4167  | 33.5969 | 74.7333 | 3.0272 | 2.8591 |
| 4/18/2019 10:32 | 0.2    | -0.6083 | 30.9433 | 0.2667  | 33.7478 | 74.35   | 3.0452 | 2.8718 |
| 4/18/2019 10:33 | 0.175  | 0.1583  | 30.805  | 0.9333  | 33.5591 | 73.9583 | 3.0398 | 2.86   |
| 4/18/2019 10:34 | 0.1333 | 0.6583  | 30.2475 | 0.6     | 33.1276 | 73.5583 | 3.004  | 2.8309 |
| 4/18/2019 10:35 | 0.125  | 0.1417  | 29.2817 | -0.0333 | 32.1097 | 73.0364 | 2.9377 | 2.8416 |
| 4/18/2019 10:36 | 0.1083 | -0.7333 | 29.5633 | -0.6833 | 32.1401 | 72.62   | 2.9658 | 2.8493 |
| 4/18/2019 10:37 | 0.1    | -0.4167 | 28.4567 | 0.35    | 31.6513 | 72.1833 | 2.9021 | 2.8211 |
| 4/18/2019 10:38 | 0.1667 | 0.2417  | 25.8167 | 0.3833  | 29.6138 | 71.3818 | 2.7289 | 2.7559 |
| 4/18/2019 10:39 | 0.2    | -0.2833 | 24.2617 | -0.2833 | 28.1952 | 70.1455 | 2.6166 | 2.6818 |
| 4/18/2019 10:40 | 0.2    | 0.1833  | 25.62   | -0.3333 | 29.4743 | 69.15   | 2.6709 | 2.7258 |
| 4/18/2019 10:41 | 0.2    | -0.2083 | 23.2892 | -0.6    | 29.5918 | 67.9    | 2.4573 | 2.6325 |
| 4/18/2019 10:42 | 0.25   | 0.3     | 20.3142 | 0.1833  | 28.8116 | 65.8917 | 2.1355 | 2.4744 |
| 4/18/2019 10:43 | 0.5    | 1.6833  | 18.0908 | 1.35    | 27.223  | 63.2667 | 1.8555 | 2.364  |
| 4/18/2019 10:44 | 1.2583 | 3.25    | 14.325  | 2.2     | 22.6918 | 59.6667 | 1.3482 | 2.106  |
| 4/18/2019 10:45 | 1.8667 | 2.8167  | 13.6267 | 2.3167  | 22.9888 | 55.9091 | 1.3155 | 2.061  |
| 4/18/2019 10:46 | 2.15   | 2.7     | 13.0133 | 1.7667  | 23.7971 | 51.6091 | 1.319  | 2.0612 |
| 4/18/2019 10:47 | 2.0417 | 3.0333  | 12.3008 | 2.1667  | 22.907  | 47.7    | 1.2048 | 2.0442 |
| 4/18/2019 10:48 | 2.2167 | 4.0583  | 11.5042 | 3.0333  | 21.8503 | 43.1636 | 1.0647 | 1.9858 |
| 4/18/2019 10:49 | 2.6833 | 3.525   | 11.0033 | 3.45    | 20.9896 | 38.6917 | 0.978  | 1.9015 |
| 4/18/2019 10:50 | 2.9333 | 3.6917  | 10.76   | 2.9667  | 20.9469 | 34.5455 | 1.1024 | 1.9284 |
| 4/18/2019 10:51 | 3.0833 | 3.0583  | 10.6942 | 3.7833  | 21.0792 | 30.8909 | 1.0131 | 1.8976 |
| 4/18/2019 10:52 | 3.2333 | 3.6667  | 10.2228 | 3.85    | 20.905  | 26.7083 | 0.9231 | 1.8662 |
| 4/18/2019 10:53 | 3.525  | 4.45    | 9.6612  | 4.15    | 20.714  | 22.78   | 0.8664 | 1.8629 |
| 4/18/2019 10:54 | 4.05   | 5.0917  | 10.0748 | 5.3667  | 18.6739 | 19.4917 | 0.7952 | 1.8316 |
| 4/18/2019 10:55 | 4.3583 | 4.9333  | 10.067  | 5.0667  | 18.1642 | 16.8667 | 0.7528 | 1.8305 |
| 4/18/2019 10:56 | 4.9833 | 6.8917  | 10.65   | 6.4     | 16.7801 | 15.3167 | 0.6768 | 1.7718 |
| 4/18/2019 10:57 | 5.45   | 6.175   | 10.3665 | 6.0833  | 16.238  | 14.1    | 0.6442 | 1.7578 |
| 4/18/2019 10:58 | 6.0833 | 7.65    | 11.0775 | 8.5833  | 15.2371 | 12.7091 | 0.5822 | 1.7368 |

|                 |         |         |         |         |         |         |        |        |
|-----------------|---------|---------|---------|---------|---------|---------|--------|--------|
| 4/18/2019 10:59 | 6.4917  | 7.5583  | 10.7    | 7.85    | 14.7696 | 11.4583 | 0.5762 | 1.705  |
| 4/18/2019 11:00 | 6.8917  | 7.9     | 11.1517 | 8.4     | 14.3416 | 10.31   | 0.5383 | 1.6878 |
| 4/18/2019 11:01 | 7.2167  | 8.0167  | 11.085  | 8.2     | 13.4799 | 9.6273  | 0.4989 | 1.6573 |
| 4/18/2019 11:02 | 7.575   | 8.85    | 11.9025 | 8.7833  | 13.1593 | 8.9364  | 0.494  | 1.6453 |
| 4/18/2019 11:03 | 8.025   | 10.1917 | 12.4133 | 9.4     | 12.2757 | 8.1167  | 0.4477 | 1.6634 |
| 4/18/2019 11:04 | 8.5167  | 9.425   | 11.885  | 9.3667  | 11.7084 | 7.61    | 0.414  | 1.6658 |
| 4/18/2019 11:05 | 8.7583  | 8.6917  | 11.8967 | 8.9167  | 11.6586 | 7.2333  | 0.4226 | 1.6348 |
| 4/18/2019 11:06 | 9.125   | 10.5833 | 12.5508 | 10.1833 | 11.3059 | 6.6182  | 0.3889 | 1.6432 |
| 4/18/2019 11:07 | 9.2917  | 10.375  | 12.7558 | 10.5833 | 10.7888 | 6.1     | 0.3839 | 1.6368 |
| 4/18/2019 11:08 | 9.625   | 11      | 13.0175 | 11.15   | 10.4267 | 5.6727  | 0.365  | 1.6357 |
| 4/18/2019 11:09 | 9.7667  | 10.7167 | 13.0958 | 11.35   | 10.0228 | 5.6     | 0.3417 | 1.6066 |
| 4/18/2019 11:10 | 10.0333 | 12.3667 | 13.6492 | 12.1333 | 9.4326  | 5.6583  | 0.3385 | 1.6092 |
| 4/18/2019 11:11 | 10.2917 | 11.7333 | 13.4125 | 11.4    | 9.0958  | 5.8556  | 0.3213 | 1.6237 |
| 4/18/2019 11:12 | 10.6917 | 12.9167 | 13.9758 | 12.2667 | 8.9336  | 5.8167  | 0.3032 | 1.6157 |
| 4/18/2019 11:13 | 10.8583 | 11.9833 | 13.4333 | 12.4167 | 8.7051  | 5.64    | 0.3118 | 1.6166 |
| 4/18/2019 11:14 | 11.1917 | 12.7833 | 14.3925 | 13.25   | 8.4358  | 5.5182  | 0.2793 | 1.6122 |
| 4/18/2019 11:15 | 11.3    | 12.1167 | 14.37   | 12.8667 | 8.3573  | 5.5818  | 0.2877 | 1.6061 |
| 4/18/2019 11:16 | 11.65   | 13.175  | 14.7867 | 13.1833 | 8.1646  | 5.5818  | 0.2669 | 1.5823 |
| 4/18/2019 11:17 | 11.8917 | 13.7083 | 14.8158 | 13.4833 | 7.9766  | 5.4182  | 0.2578 | 1.5678 |
| 4/18/2019 11:18 | 12.2333 | 12.4    | 14.9225 | 13.4833 | 7.6647  | 5.325   | 0.2588 | 1.5823 |
| 4/18/2019 11:19 | 12.3583 | 13.2583 | 15.0642 | 13.5167 | 7.5839  | 5.35    | 0.2463 | 1.6143 |
| 4/18/2019 11:20 | 12.5417 | 14.2333 | 15.7467 | 14.15   | 7.3135  | 5.125   | 0.2489 | 1.6232 |
| 4/18/2019 11:21 | 12.8667 | 14.4667 | 16.0158 | 14.8833 | 7.0091  | 4.7727  | 0.2321 | 1.5763 |
| 4/18/2019 11:22 | 13.2667 | 14.65   | 16.3592 | 15.1833 | 6.8507  | 4.4167  | 0.2233 | 1.5956 |
| 4/18/2019 11:23 | 13.725  | 14.6833 | 16.6875 | 15.6167 | 6.6197  | 3.9     | 0.2299 | 1.6308 |
| 4/18/2019 11:24 | 13.9667 | 15.8583 | 16.6767 | 16.0833 | 6.4414  | 3.6583  | 0.2211 | 1.5869 |
| 4/18/2019 11:25 | 14.2    | 15.0833 | 16.9625 | 15.3333 | 6.3126  | 3.6273  | 0.2122 | 1.578  |
| 4/18/2019 11:26 | 14.3583 | 16.0417 | 16.7925 | 15.6333 | 6.2064  | 3.6917  | 0.2206 | 1.6005 |
| 4/18/2019 11:27 | 14.6417 | 16.05   | 17.1925 | 16.2333 | 5.9799  | 3.5091  | 0.1957 | 1.6118 |
| 4/18/2019 11:28 | 14.9167 | 16.0417 | 17.9283 | 17.0167 | 5.8291  | 3.2667  | 0.2031 | 1.5758 |
| 4/18/2019 11:29 | 15.2083 | 15.8667 | 17.8633 | 16.4833 | 5.696   | 3       | 0.1979 | 1.5568 |
| 4/18/2019 11:30 | 15.4333 | 15.775  | 17.935  | 17.3833 | 5.4981  | 3       | 0.1918 | 1.5588 |
| 4/18/2019 11:31 | 15.5333 | 16.0417 | 17.6233 | 16.8333 | 5.3571  | 2.9     | 0.2002 | 1.5798 |
| 4/18/2019 11:32 | 15.7417 | 17.0417 | 18.2983 | 17.35   | 5.2206  | 2.9636  | 0.1791 | 1.6046 |
| 4/18/2019 11:33 | 15.8667 | 16.525  | 17.87   | 17.15   | 5.0753  | 2.9333  | 0.1878 | 1.5864 |
| 4/18/2019 11:34 | 16.1167 | 17.6083 | 18.4783 | 17.2167 | 5.0568  | 2.85    | 0.1961 | 1.5713 |
| 4/18/2019 11:35 | 16.2917 | 16.9    | 18.4317 | 17.4667 | 4.8768  | 2.83    | 0.1718 | 1.5624 |
| 4/18/2019 11:36 | 16.4083 | 16.9667 | 18.5867 | 17.5333 | 4.8556  | 2.9417  | 0.1858 | 1.5893 |
| 4/18/2019 11:37 | 16.575  | 16.55   | 18.965  | 17.95   | 4.775   | 3.0545  | 0.1748 | 1.5678 |
| 4/18/2019 11:38 | 16.8667 | 17.1833 | 19.0483 | 18      | 4.5933  | 3.0917  | 0.1745 | 1.552  |
| 4/18/2019 11:39 | 17.3    | 18.675  | 19.6533 | 18.45   | 4.5544  | 3       | 0.1764 | 1.5394 |
| 4/18/2019 11:40 | 17.5833 | 17.7417 | 20.2083 | 18.5    | 4.5578  | 3.025   | 0.1627 | 1.5688 |
| 4/18/2019 11:41 | 17.6417 | 17.675  | 19.6817 | 18.0167 | 4.529   | 3.17    | 0.1783 | 1.5755 |
| 4/18/2019 11:42 | 17.5917 | 17.9083 | 19.69   | 18.9    | 4.4349  | 3.2     | 0.1704 | 1.5668 |
| 4/18/2019 11:43 | 17.45   | 18.05   | 19.5283 | 18.5833 | 4.3994  | 3.2636  | 0.164  | 1.5662 |
| 4/18/2019 11:44 | 17.425  | 17.45   | 19.405  | 18.9833 | 4.4087  | 3.4167  | 0.1774 | 1.5952 |
| 4/18/2019 11:45 | 17.2583 | 17.075  | 19.2183 | 18.0333 | 4.4301  | 3.5091  | 0.1608 | 1.5904 |

|                 |         |         |         |         |         |         |        |        |
|-----------------|---------|---------|---------|---------|---------|---------|--------|--------|
| 4/18/2019 11:46 | 17.2833 | 17.8917 | 24.09   | 19      | 4.3677  | 3.7455  | 0.1715 | 1.5618 |
| 4/18/2019 11:47 | 17.4167 | 18.0667 | 19.5833 | 18.2833 | 4.3355  | 4.2091  | 0.1691 | 1.5733 |
| 4/18/2019 11:48 | 17.6417 | 18.5167 | 19.875  | 19.2167 | 4.3463  | 4.475   | 0.166  | 1.5414 |
| 4/18/2019 11:49 | 17.7    | 17.3333 | 19.2583 | 17.95   | 4.4121  | 4.7833  | 0.174  | 1.5631 |
| 4/18/2019 11:50 | 17.6333 | 17.7083 | 19.06   | 18.3167 | 4.8538  | 4.8636  | 0.1625 | 1.5574 |
| 4/18/2019 11:51 | 17.4167 | 17.575  | 18.8083 | 17.9    | 5.0621  | 5.0583  | 0.156  | 1.5793 |
| 4/18/2019 11:52 | 17.175  | 17.3833 | 18.8167 | 18.3333 | 4.9142  | 5.3     | 0.175  | 1.5705 |
| 4/18/2019 11:53 | 17.2    | 18.5917 | 19.2517 | 18.3    | 4.904   | 5.2667  | 0.1594 | 1.5966 |
| 4/18/2019 11:54 | 17.35   | 18.3667 | 19.3367 | 18.75   | 4.8947  | 5.2     | 0.1778 | 1.5645 |
| 4/18/2019 11:55 | 17.625  | 17.725  | 19.2717 | 18.1333 | 4.6508  | 5.1833  | 0.1625 | 1.5996 |
| 4/18/2019 11:56 | 17.6833 | 18.3667 | 19.405  | 18.5167 | 4.5125  | 5.1833  | 0.1543 | 1.5907 |
| 4/18/2019 11:57 | 17.9917 | 18.475  | 20.1033 | 19.4167 | 4.4411  | 5.3083  | 0.1647 | 1.6052 |
| 4/18/2019 11:58 | 18.2833 | 17.7917 | 20.3033 | 20.0167 | 4.4133  | 5.325   | 0.1546 | 1.5893 |
| 4/18/2019 11:59 | 18.5083 | 18.1417 | 20.23   | 19.3833 | 4.3027  | 5       | 0.1577 | 1.5842 |
| 4/18/2019 12:00 | 18.625  | 19.0833 | 21.32   | 19.85   | 4.1831  | 4.73    | 0.1675 | 1.5743 |
| 4/18/2019 12:01 | 18.9091 | 19.825  | 20.745  | 19.9333 | 4.1369  | 4.6636  | 0.158  | 1.6009 |
| 4/18/2019 12:02 | 18.9417 | 18.1333 | 19.935  | 17.6    | 4.1213  | 4.6818  | 0.1636 | 1.6018 |
| 4/18/2019 12:03 | 19.1917 | 19.8167 | 21.2367 | 20.55   | 3.9373  | 4.7833  | 0.1485 | 1.5781 |
| 4/18/2019 12:04 | 19.2    | 19.5417 | 20.5883 | 20.0667 | 3.9303  | 4.9083  | 0.1468 | 1.5666 |
| 4/18/2019 12:05 | 19.5    | 19.2917 | 20.5867 | 19.8833 | 3.9037  | 5.2     | 0.1634 | 1.5711 |
| 4/18/2019 12:06 | 19.525  | 20.0667 | 21.29   | 20.7    | 3.8005  | 5.4     | 0.1506 | 1.5652 |
| 4/18/2019 12:07 | 19.7333 | 20.4    | 21.6117 | 20.55   | 3.7918  | 5.3     | 0.1647 | 1.5699 |
| 4/18/2019 12:08 | 19.775  | 20.2917 | 21.3117 | 20.7833 | 3.7332  | 5.3     | 0.1601 | 1.5483 |
| 4/18/2019 12:09 | 19.525  | 19.1583 | 20.3833 | 19.8667 | 3.782   | 5.2417  | 0.154  | 1.5336 |
| 4/18/2019 12:10 | 19.1417 | 18.4833 | 20.3083 | 19.5667 | 3.7817  | 5.1455  | 0.1639 | 1.5528 |
| 4/18/2019 12:11 | 18.75   | 18.8667 | 19.7283 | 18.9833 | 3.7689  | 5.1375  | 0.1539 | 1.5881 |
| 4/18/2019 12:12 | 18.325  | 17.7667 | 19.3617 | 18.2167 | 3.7736  | 4.98    | 0.1569 | 1.6154 |
| 4/18/2019 12:13 | 17.8083 | 17.6    | 19.2833 | 17.5167 | 3.7725  | 4.8091  | 0.1673 | 1.6038 |
| 4/18/2019 12:14 | 17.3583 | 17.5417 | 19.015  | 17.4    | 3.7768  | 4.62    | 0.1548 | 1.6084 |
| 4/18/2019 12:15 | 17.0167 | 16.775  | 18.925  | 17.1833 | 3.7595  | 4.425   | 0.164  | 1.6295 |
| 4/18/2019 12:16 | 16.6583 | 15.725  | 18.2783 | 15.9167 | 3.7637  | 4.1     | 0.1498 | 1.6206 |
| 4/18/2019 12:17 | 16.125  | 15.6083 | 17.7167 | 16.0167 | 3.7489  | 3.725   | 0.1599 | 1.6111 |
| 4/18/2019 12:18 | 15.5833 | 15.5083 | 17.3867 | 14.8667 | 3.7657  | 3.75    | 0.1661 | 1.6413 |
| 4/18/2019 12:19 | 15.0167 | 14.925  | 16.7817 | 14.75   | 3.7458  | 4.0167  | 0.1523 | 1.6281 |
| 4/18/2019 12:20 | 14.6833 | 14.5917 | 16.5633 | 14.8167 | 3.7365  | 4.19    | 0.1626 | 1.6669 |
| 4/18/2019 12:21 | 14.4333 | 14.3917 | 16.51   | 14.25   | 3.7423  | 4.1818  | 0.1626 | 1.6739 |
| 4/18/2019 12:22 | 14.2167 | 14      | 16.2017 | 14.0333 | 3.7332  | 4.14    | 0.157  | 1.6718 |
| 4/18/2019 12:23 | 13.925  | 13.3667 | 16.0033 | 14.25   | 3.7324  | 4.0083  | 0.1728 | 1.6887 |
| 4/18/2019 12:24 | 13.6667 | 13.5667 | 15.8633 | 13.2167 | 3.7271  | 4       | 0.1579 | 1.6888 |
| 4/18/2019 12:25 | 13.2917 | 12.475  | 14.925  | 13.1    | 3.713   | 4.0545  | 0.1741 | 1.8627 |
| 4/18/2019 12:26 | 12.8    | 11.7333 | 14.795  | 13      | 3.6755  | 4.1364  | 0.1582 | 2.2353 |
| 4/18/2019 12:27 | 12.475  | 12.0667 | 14.9483 | 12.85   | 3.6925  | 4.15    | 0.1657 | 1.9711 |
| 4/18/2019 12:28 | 12.3    | 12.0417 | 14.5433 | 12.3333 | 3.7004  | 4.3917  | 0.1742 | 1.7239 |
| 4/18/2019 12:29 | 12.2583 | 12.1    | 14.3383 | 11.9833 | 3.6998  | 4.3333  | 0.1594 | 1.6856 |
| 4/18/2019 12:30 | 12.075  | 11.7917 | 14.3517 | 12.1    | 3.6854  | 4.2833  | 0.1617 | 1.7519 |
| 4/18/2019 12:31 | 11.8917 | 11.65   | 14.4817 | 11.9    | 3.8043  | 4.0455  | 0.1621 | 1.7599 |
| 4/18/2019 12:32 | 10.8417 | 7       | 11.7017 | 6.6     | 19.8688 | 13.3667 | 0.2296 | 1.7043 |

|                 |         |         |         |         |         |          |        |        |
|-----------------|---------|---------|---------|---------|---------|----------|--------|--------|
| 4/18/2019 12:33 | 8.225   | 3.3583  | 15.3233 | 3.9167  | 36.9454 | 50.1364  | 0.5979 | 1.7013 |
| 4/18/2019 12:34 | 4.75    | 1.0417  | 28.19   | 2.2667  | 49.7672 | 69.725   | 1.0496 | 1.8683 |
| 4/18/2019 12:35 | 1.925   | 0.1583  | 55.1783 | 2.7333  | 54.5188 | 99.4917  | 1.5912 | 2.2742 |
| 4/18/2019 12:36 | 0.6667  | -0.15   | 80.1133 | 4.5333  | 62.4233 | 127.0364 | 5.1365 | 2.5489 |
| 4/18/2019 12:37 | 0.1583  | 0.2333  | 72.5233 | 1.5333  | 52.1678 | 148.4909 | 4.229  | 2.4722 |
| 4/18/2019 12:38 | 0.0167  | 0.3167  | 78.175  | 1.5667  | 51.4883 | 162.1182 | 3.7842 | 2.5968 |
| 4/18/2019 12:39 | 0       | -0.7083 | 75.2117 | 1.6167  | 50.0793 | 152.2    | 3.442  | 2.6132 |
| 4/18/2019 12:40 | 0       | -0.75   | 72.2783 | 1.2     | 49.3006 | 158.14   | 3.9048 | 2.575  |
| 4/18/2019 12:41 | 0.0583  | -0.2    | 69.5033 | 1.1667  | 48.5114 | 139.2091 | 3.5507 | 2.5711 |
| 4/18/2019 12:42 | 0.1     | -0.4    | 68.9633 | 1.0333  | 47.9929 | 158.23   | 3.6498 | 2.5227 |
| 4/18/2019 12:43 | 0.1     | 0.0667  | 68.14   | 0.8167  | 47.4738 | 148.75   | 3.3525 | 2.5398 |
| 4/18/2019 12:44 | 0.1     | -0.1333 | 66.955  | 1.2333  | 47.0542 | 138.5909 | 3.2148 | 2.5255 |
| 4/18/2019 12:45 | 0.1     | -0.6333 | 66.135  | 0.6     | 46.5694 | 111.4333 | 3.197  | 2.5059 |
| 4/18/2019 12:46 | 0.2     | 0.05    | 65.2767 | 0.3833  | 46.2134 | 86.1417  | 3.2705 | 2.5106 |
| 4/18/2019 12:47 | 0.2     | -0.0167 | 64.8683 | 0.6333  | 45.719  | 78.1273  | 3.2528 | 2.5282 |
| 4/18/2019 12:48 | 0.2     | -0.3917 | 63.695  | 0.7     | 45.1941 | 77.2818  | 3.1932 | 2.5123 |
| 4/18/2019 12:49 | 0.2     | -0.1167 | 62.4517 | 1.2     | 44.6074 | 92.3636  | 3.2245 | 2.4991 |
| 4/18/2019 12:50 | 0.2     | -0.8417 | 60.895  | 0.7333  | 43.9241 | 78.3     | 3.1362 | 2.4949 |
| 4/18/2019 12:51 | 0.2     | -0.025  | 59.6817 | 0.3667  | 43.2904 | 79.075   | 2.9518 | 2.5083 |
| 4/18/2019 12:52 | 0.2     | -0.5083 | 58.7917 | 0.8333  | 42.8149 | 76.01    | 2.8832 | 2.4978 |
| 4/18/2019 12:53 | 0.2833  | -0.575  | 57.6717 | 0.9     | 42.2309 | 75.875   | 2.8492 | 2.4824 |
| 4/18/2019 12:54 | 0.2917  | -0.3917 | 56.89   | 0.95    | 42.026  | 75.9     | 2.8565 | 2.4752 |
| 4/18/2019 12:55 | 0.225   | -0.6833 | 55.9683 | 0.7833  | 42.0148 | 76.4167  | 2.8008 | 2.475  |
| 4/18/2019 12:56 | 0.225   | -0.2333 | 55.2233 | 0.5333  | 41.2436 | 76.45    | 2.809  | 2.4729 |
| 4/18/2019 12:57 | 0.3     | -0.9083 | 54.7033 | 0.7667  | 40.7846 | 77.1818  | 2.78   | 2.4591 |
| 4/18/2019 12:58 | 0.3     | -0.6    | 53.7267 | 0.6167  | 40.0366 | 76.9727  | 2.7355 | 2.4349 |
| 4/18/2019 12:59 | 0.3     | -0.3083 | 52.8083 | 0.4     | 39.6418 | 77.1273  | 2.6935 | 2.4315 |
| 4/18/2019 13:00 | 0.2667  | -0.575  | 51.8733 | 0.4833  | 39.0371 | 77.825   | 2.678  | 2.4446 |
| 4/18/2019 13:01 | 0.2     | -0.4583 | 51.5433 | 0.2333  | 38.7825 | 78.3455  | 2.6705 | 2.454  |
| 4/18/2019 13:02 | 0.2     | -0.2833 | 50.0025 | 0.75    | 38.0643 | 79.0818  | 2.6235 | 2.4279 |
| 4/18/2019 13:03 | 0.2     | -0.6833 | 49.5567 | 0.4833  | 37.7785 | 79.9167  | 2.629  | 2.3998 |
| 4/18/2019 13:04 | 0.2     | 0.2     | 48.4358 | 0.6833  | 37.0846 | 80.5455  | 2.5863 | 2.4035 |
| 4/18/2019 13:05 | 0.1667  | -0.0667 | 47.4342 | -0.05   | 36.5893 | 82       | 2.5695 | 2.3989 |
| 4/18/2019 13:06 | 0.1     | 0.475   | 47.2933 | 0.4333  | 36.5096 | 82.9636  | 2.5702 | 2.3916 |
| 4/18/2019 13:07 | 0.075   | -0.4583 | 46.795  | -0.0667 | 36.0823 | 81.375   | 2.5447 | 2.4043 |
| 4/18/2019 13:08 | 0       | -0.5417 | 45.8075 | 0.4167  | 35.6637 | 81.0636  | 2.5468 | 2.4071 |
| 4/18/2019 13:09 | -0.0333 | -0.6167 | 46.1683 | -0.3    | 35.3587 | 80.6583  | 2.5277 | 2.386  |
| 4/18/2019 13:10 | -0.0583 | -0.175  | 44.935  | 0.0167  | 35.0006 | 80.6455  | 2.5123 | 2.3893 |
| 4/18/2019 13:11 | 0       | 0.2667  | 44.1225 | -0.1833 | 34.3875 | 80.0727  | 2.4883 | 2.3741 |
| 4/18/2019 13:12 | 0.0167  | -0.6667 | 44.0592 | -0.2333 | 34.1449 | 79.7455  | 2.463  | 2.3794 |
| 4/18/2019 13:13 | 0.0833  | -0.65   | 42.71   | 0.1     | 33.9456 | 78.7455  | 2.4723 | 2.386  |
| 4/18/2019 13:14 | 0.0917  | 0.675   | 42.7917 | 0.15    | 33.387  | 78.6636  | 2.439  | 2.4103 |
| 4/18/2019 13:15 | 0.0583  | 0.2333  | 42.2792 | 0.1     | 33.0954 | 78.5909  | 2.4262 | 2.4124 |
| 4/18/2019 13:16 | 0.05    | 0.5083  | 42.9433 | 0.5167  | 32.9147 | 78.85    | 2.436  | 2.3833 |
| 4/18/2019 13:17 | 0       | 0.025   | 41.3475 | 0.1667  | 32.8038 | 78.06    | 2.4065 | 2.392  |
| 4/18/2019 13:18 | -0.0917 | 0.3083  | 40.4725 | 0.1333  | 32.2502 | 77.8273  | 2.4092 | 2.3929 |
| 4/18/2019 13:19 | 0       | -0.5917 | 39.3725 | -0.1667 | 31.9114 | 78.1727  | 2.3772 | 2.3774 |

|                 |        |         |         |         |         |         |        |        |
|-----------------|--------|---------|---------|---------|---------|---------|--------|--------|
| 4/18/2019 13:20 | 0      | -0.0667 | 39.0425 | -0.4667 | 31.3197 | 78.49   | 2.3353 | 2.3576 |
| 4/18/2019 13:21 | 0.1    | -0.2333 | 38.7183 | 0.2167  | 31.1486 | 78.2667 | 2.3492 | 2.3557 |
| 4/18/2019 13:22 | 0.0917 | -0.2667 | 38.4125 | -0.5333 | 30.7896 | 77.2818 | 2.3255 | 2.3607 |
| 4/18/2019 13:23 | 0.1    | -0.4083 | 38.1325 | -0.0833 | 30.6649 | 77.4727 | 2.3217 | 2.3718 |
| 4/18/2019 13:24 | 0.1    | 0.025   | 37.5217 | 0.4     | 30.3934 | 78.6909 | 2.3143 | 2.3657 |
| 4/18/2019 13:25 | 0.1    | -0.5167 | 36.7517 | -0.3333 | 29.7805 | 80.0833 | 2.269  | 2.368  |
| 4/18/2019 13:26 | 0.1583 | -0.5833 | 36.3658 | -0.4167 | 29.3643 | 81.0182 | 2.2643 | 2.3384 |
| 4/18/2019 13:27 | 0.1667 | -0.05   | 36.0767 | 0.2     | 29.2304 | 79.8833 | 2.2497 | 2.3285 |
| 4/18/2019 13:28 | 0.2    | -0.1083 | 35.7358 | 0.3667  | 29.0485 | 77.88   | 2.2547 | 2.3136 |
| 4/18/2019 13:29 | 0.1    | -0.1    | 35.2317 | -0.2167 | 28.6698 | 77.1083 | 2.2328 | 2.2891 |
| 4/18/2019 13:30 | 0.1917 | -0.6667 | 34.59   | -0.2833 | 28.1762 | 77.275  | 2.1913 | 2.3149 |
| 4/18/2019 13:31 | 0.2    | -0.35   | 34.6467 | 0       | 28.0358 | 78.92   | 2.2055 | 2.3323 |
| 4/18/2019 13:32 | 0.2    | -0.05   | 34.5325 | 0.05    | 28.0365 | 80.8636 | 2.1905 | 2.3268 |
| 4/18/2019 13:33 | 0.1583 | -0.5667 | 33.665  | -0.1833 | 27.5486 | 81.2091 | 2.1693 | 2.2822 |
| 4/18/2019 13:34 | 0.175  | -0.4083 | 33.3167 | -0.3    | 27.1531 | 81.41   | 2.1583 | 2.2953 |
| 4/18/2019 13:35 | 0.175  | -0.625  | 33.2058 | -0.6    | 27.1123 | 81.6364 | 2.1527 | 2.2958 |
| 4/18/2019 13:36 | 0.2    | -0.2917 | 32.5492 | -0.3333 | 26.7309 | 79.1    | 2.1477 | 2.2794 |
| 4/18/2019 13:37 | 0.1333 | -0.6    | 31.5175 | -0.35   | 26.3111 | 76.1182 | 2.1025 | 2.2828 |
| 4/18/2019 13:38 | 0.1167 | -0.375  | 31.5283 | -0.1    | 25.9715 | 73.5417 | 2.0887 | 2.2874 |
| 4/18/2019 13:39 | 0.1    | -0.1917 | 31.1792 | -0.4333 | 25.8709 | 72.6455 | 2.0901 | 2.3166 |
| 4/18/2019 13:40 | 0.1    | 0.3417  | 31.1083 | -0.05   | 25.7551 | 72.1333 | 2.0751 | 2.3285 |
| 4/18/2019 13:41 | 0.1    | 0.2     | 30.9425 | -0.0167 | 25.5547 | 71.0636 | 2.0798 | 2.3153 |
| 4/18/2019 13:42 | 0.1    | -0.4167 | 31.1825 | 0.1333  | 25.2408 | 68.8667 | 2.0528 | 2.3007 |
| 4/18/2019 13:43 | 0.0917 | -0.1167 | 29.805  | 0.2333  | 24.8789 | 66.31   | 2.0301 | 2.3173 |
| 4/18/2019 13:44 | 0.075  | -0.2917 | 29.4792 | 0.35    | 24.6193 | 63.45   | 2.0174 | 2.3158 |
| 4/18/2019 13:45 | 0      | -0.6167 | 29.1542 | -0.55   | 24.6141 | 60.3667 | 2.0141 | 2.3057 |
| 4/18/2019 13:46 | 0      | -0.0333 | 29.0908 | -0.3333 | 24.4841 | 58.8167 | 2.021  | 2.2818 |
| 4/18/2019 13:47 | 0.0417 | 0.1     | 28.9075 | 0.2833  | 24.2093 | 57.5091 | 2.0042 | 2.2824 |
| 4/18/2019 13:48 | 0.1    | -0.1083 | 28.3067 | -0.7833 | 23.8625 | 56.8    | 1.971  | 2.2773 |
| 4/18/2019 13:49 | 0.1    | -0.225  | 28.56   | -0.1667 | 23.7108 | 57.175  | 1.9817 | 2.2673 |
| 4/18/2019 13:50 | 0.1    | 0.1167  | 28.5217 | -0.1    | 23.5373 | 57.1917 | 1.956  | 2.2641 |
| 4/18/2019 13:51 | 0.1    | 0.0167  | 27.9708 | -0.0333 | 23.1763 | 55.59   | 1.9422 | 2.3005 |
| 4/18/2019 13:52 | 0.1    | -0.3333 | 26.3008 | -0.1667 | 22.4113 | 54.6    | 1.8576 | 2.2364 |
| 4/18/2019 13:53 | 0.1    | 0.05    | 24.7858 | -0.45   | 21.9829 | 54.1333 | 1.7745 | 2.2638 |
| 4/18/2019 13:54 | 0.15   | -0.4167 | 24.5392 | -0.0667 | 22.8141 | 52.8818 | 1.7428 | 2.213  |
| 4/18/2019 13:55 | 0.4583 | 0.7583  | 21.5992 | 1       | 22.988  | 51.3583 | 1.5127 | 2.1254 |
| 4/18/2019 13:56 | 0.8083 | 1.3583  | 19.9225 | 0.7833  | 22.988  | 49.2636 | 1.419  | 2.0628 |
| 4/18/2019 13:57 | 1.1917 | 1.7583  | 18.4858 | 1.1     | 23.0788 | 48.02   | 1.2942 | 2.032  |
| 4/18/2019 13:58 | 1.5417 | 2.6333  | 17.6683 | 2.25    | 22.7835 | 45.9636 | 1.1621 | 1.9663 |
| 4/18/2019 13:59 | 2.0333 | 3.1167  | 15.1158 | 2.65    | 22.0823 | 43.36   | 1.3269 | 1.8714 |
| 4/18/2019 14:00 | 2.5667 | 3.7917  | 15.285  | 2.95    | 21.2826 | 41.2833 | 1.0015 | 1.9061 |
| 4/18/2019 14:01 | 3.225  | 5.325   | 15.1033 | 4.5     | 19.6861 | 38.0091 |        | 1.8305 |
| 4/18/2019 14:02 | 3.9333 | 5.1333  | 14.5325 | 5.3333  | 18.3664 | 34.43   |        | 1.7221 |
| 4/18/2019 14:03 | 4.5833 | 5.4667  | 14.1367 | 5.3833  | 17.8153 | 31.5727 |        | 1.5123 |
| 4/18/2019 14:04 | 5.0667 | 5.8     | 13.6292 | 6.0333  | 17.3782 | 29.0636 |        | 0.8849 |
| 4/18/2019 14:05 | 5.55   | 6.875   | 13.77   | 7.4167  | 16.2963 | 26.18   |        | 1.5907 |
| 4/18/2019 14:06 | 6.2333 | 7.5583  | 13.665  | 8.65    | 15.2751 | 23.5636 |        | 1.7158 |



|                 |         |         |         |         |         |         |        |
|-----------------|---------|---------|---------|---------|---------|---------|--------|
| 4/18/2019 14:07 | 7.0417  | 8.7417  | 13.6925 | 8.3833  | 14.5637 | 20.9182 | 1.6826 |
| 4/18/2019 14:08 | 7.6917  | 9.3083  | 14.1517 | 9.3333  | 13.9383 | 18.45   | 1.6898 |
| 4/18/2019 14:09 | 8.15    | 9.4417  | 13.7133 | 8.8833  | 13.7452 | 17.0083 | 1.7098 |
| 4/18/2019 14:10 | 8.4083  | 9.2333  | 13.7608 | 9.4333  | 13.2083 | 16.0167 | 1.6873 |
| 4/18/2019 14:11 | 8.775   | 10.35   | 14.2708 | 10.8833 | 12.6791 | 15.2167 | 1.7143 |
| 4/18/2019 14:12 | 9.1583  | 10.1583 | 13.7817 | 10.4333 | 12.142  | 13.7111 | 1.6897 |
| 4/18/2019 14:13 | 9.5667  | 11.5083 | 14.2683 | 11.75   | 11.356  | 12.8273 | 1.6692 |
| 4/18/2019 14:14 | 10.1167 | 12.15   | 14.5933 | 12.0667 | 10.3063 | 12.4636 | 1.6529 |
| 4/18/2019 14:15 | 10.5083 | 11.3    | 14.0192 | 11.85   | 10.3074 | 12.0364 | 1.6606 |
| 4/18/2019 14:16 | 11.0083 | 12.7    | 15.2292 | 12.7167 | 9.5508  | 11.5    | 1.6546 |
| 4/18/2019 14:17 | 11.3167 | 12.925  | 14.7183 | 13.1    | 9.1428  | 11.4909 | 1.6378 |
| 4/18/2019 14:18 | 11.775  | 13.1583 | 15.5558 | 13.0833 | 8.7771  | 10.9455 | 1.631  |
| 4/18/2019 14:19 | 12.0833 | 13.2917 | 15.5208 | 13.6833 | 8.8143  | 10.7    | 1.6061 |
| 4/18/2019 14:20 | 12.2583 | 13.3167 | 15.4858 | 13.2333 | 9.3383  | 10.22   | 1.6868 |
| 4/18/2019 14:21 | 12.2818 | 13.05   | 13.8108 | 12.15   | 9.6697  | 9.525   | 1.6713 |
| 4/18/2019 14:22 | 12.3    | 13.2833 | 14.93   | 13.4167 | 9.4961  | 9       | 1.6958 |
| 4/18/2019 14:23 | 12.3417 | 13.575  | 15.1608 | 13.4333 | 9.2433  | 8.5667  | 1.7053 |
| 4/18/2019 14:24 | 12.6833 | 14.3583 | 14.8417 | 14.2    | 8.6172  | 8.4     | 1.7042 |
| 4/18/2019 14:25 | 13.0083 | 14.2667 | 15.67   | 14.95   | 8.1644  | 8.15    | 1.6815 |
| 4/18/2019 14:26 | 13.4917 | 15.5583 | 15.8475 | 15.15   | 7.6523  | 8.1     | 1.6499 |
| 4/18/2019 14:27 | 13.85   | 14.6833 | 16.53   | 15.5167 | 7.4274  | 8.4455  | 1.6438 |
| 4/18/2019 14:28 | 14.175  | 14.2833 | 16.6933 | 15.7667 | 7.2129  | 8.71    | 1.645  |
| 4/18/2019 14:29 | 14.475  | 15.3333 | 17.2975 | 15.7    | 6.8958  | 8.825   | 1.6164 |
| 4/18/2019 14:30 | 14.775  | 16.1417 | 17.8317 | 16.7    | 6.6783  | 9.1091  | 1.6367 |
| 4/18/2019 14:31 | 15.0417 | 16.85   | 17.2525 | 16.2833 | 6.5434  | 9.1818  | 1.6475 |
| 4/18/2019 14:32 | 15.2    | 15.9083 | 17.2833 | 16.1333 | 6.4681  | 9.14    | 1.6134 |
| 4/18/2019 14:33 | 15.2    | 15.9667 | 17.555  | 16.25   | 6.4268  | 9.2727  | 1.5942 |
| 4/18/2019 14:34 | 15.2833 | 16.5417 | 17.425  | 16.1333 | 6.3017  | 9.3273  | 1.5877 |
| 4/18/2019 14:35 | 15.3833 | 16.3667 | 17.1433 | 15.9833 | 6.0868  | 9.375   | 1.5917 |
| 4/18/2019 14:36 | 15.525  | 16.4833 | 17.67   | 16.75   | 5.8181  | 9.6     | 1.5948 |
| 4/18/2019 14:37 | 15.7    | 16.8083 | 18.1167 | 17.4333 | 5.56    | 9.7417  | 1.6036 |
| 4/18/2019 14:38 | 16.0667 | 17.2667 | 18.5517 | 17.9167 | 5.3395  | 9.71    | 1.5661 |
| 4/18/2019 14:39 | 16.4833 | 17.5    | 18.2467 | 17.3833 | 5.0444  | 9.3667  | 1.5768 |
| 4/18/2019 14:40 | 16.6417 | 17.3083 | 18.63   | 17.2    | 4.8815  | 8.9818  | 1.5689 |
| 4/18/2019 14:41 | 16.7833 | 18.45   | 19.0767 | 18.1167 | 4.7168  | 8.8833  | 1.5601 |
| 4/18/2019 14:42 | 16.9917 | 18.4417 | 19.2317 | 18.5167 | 4.5767  | 8.8     | 1.5698 |
| 4/18/2019 14:43 | 17.2167 | 18.35   | 19.425  | 18.2667 | 4.4805  | 8.7545  | 1.5972 |
| 4/18/2019 14:44 | 17.3417 | 18.175  | 19.6083 | 18.1333 | 4.3307  | 9.2917  | 1.5358 |
| 4/18/2019 14:45 | 17.4667 | 18.075  | 19.5267 | 18.3333 | 4.2238  | 9.4273  | 1.5357 |
| 4/18/2019 14:46 | 17.6833 | 18.4583 | 19.7717 | 18.2667 | 4.0339  | 9.51    | 1.5483 |
| 4/18/2019 14:47 | 17.7917 | 18.2083 | 19.5067 | 18.95   | 4.0125  | 9.575   | 1.5841 |
| 4/18/2019 14:48 | 17.9583 | 18.9333 | 19.99   | 19.5    | 3.977   | 9.53    | 1.6098 |
| 4/18/2019 14:49 | 18      | 18.1917 | 19.3817 | 18.4333 | 4.0016  | 9.625   | 1.6118 |
| 4/18/2019 14:50 | 17.8167 | 17.0917 | 18.9333 | 17.4167 | 4.0388  | 9.7818  | 1.5901 |
| 4/18/2019 14:51 | 17.3333 | 17.425  | 18.1867 | 16.7333 | 4.0338  | 10.1167 | 1.5982 |
| 4/18/2019 14:52 | 16.8333 | 16.775  | 17.705  | 17.25   | 3.9902  | 10.3091 | 1.5964 |
| 4/18/2019 14:53 | 16.4667 | 16.5833 | 18.975  | 17.1167 | 3.9257  | 10.3333 | 1.5702 |

|                 |         |         |         |         |        |         |         |
|-----------------|---------|---------|---------|---------|--------|---------|---------|
| 4/18/2019 14:54 | 16.3    | 15.8    | 16.4283 | 16.25   | 3.8728 | 10.3556 | 1.5529  |
| 4/18/2019 14:55 | 16.0833 | 15.625  | 16.7067 | 17.2333 | 3.7731 | 10.3583 | 1.5946  |
| 4/18/2019 14:56 | 16.0083 | 16.125  | 17.7733 | 16.2167 | 3.727  | 10.1546 | 1.5975  |
| 4/18/2019 14:57 | 15.95   | 15.8417 | 17.61   | 16.25   | 3.727  | 10.0667 | 1.5835  |
| 4/18/2019 14:58 | 15.8833 | 16.55   | 17.81   | 16.3167 | 3.6993 | 9.95    | 1.5924  |
| 4/18/2019 14:59 | 15.7583 | 15.575  | 17.5133 | 15.7    | 3.7186 | 9.7167  | 1.5601  |
| 4/18/2019 15:00 | 15.6167 | 15.925  | 17.3083 | 16.4667 | 3.7495 | 9.6     | 1.5356  |
| 4/18/2019 15:01 | 15.5182 | 16.0833 | 17.28   | 16.5    | 3.7116 | 9.575   | 1.5754  |
| 4/18/2019 15:02 | 15.4333 | 14.9667 | 16.6883 | 15.9833 | 3.8063 | 9.3273  | 1.5699  |
| 4/18/2019 15:03 | 15.2667 | 15.7083 | 16.9517 | 15.0333 | 4.1302 | 8.925   | 1.5193  |
| 4/18/2019 15:04 | 15.15   | 15.8    | 16.665  | 15.25   | 4.2108 | 8.4273  | 1.4888  |
| 4/18/2019 15:05 | 15.1    | 15.025  | 16.805  | 16.1167 | 4.1762 | 7.9     | 1.5477  |
| 4/18/2019 15:06 | 15.1    | 15.3    | 16.6633 | 15.3167 | 4.0918 | 7.5091  | 1.5538  |
| 4/18/2019 15:07 | 15.1583 | 15.575  | 16.6867 | 15.2    | 3.9988 | 7.45    | 1.5061  |
| 4/18/2019 15:08 | 15.0917 | 15.2833 | 16.7267 | 15.7333 | 3.9478 | 7.35    | 1.5287  |
| 4/18/2019 15:09 | 15.1083 | 15.2583 | 16.5583 | 15.7    | 3.95   | 7.1833  | 1.5176  |
| 4/18/2019 15:10 | 15.2083 | 15.7    | 17.3633 | 16.2167 | 4.0245 | 7.05    | 1.5453  |
| 4/18/2019 15:11 | 15.2083 | 15.4917 | 16.6733 | 15.5    | 4.0246 | 7.05    | 1.5313  |
| 4/18/2019 15:12 | 15.275  | 16.1    | 16.7633 | 15.5833 | 3.9572 | 6.975   | 1.5362  |
| 4/18/2019 15:13 | 15.1833 | 15.55   | 16.7933 | 15.4833 | 3.9983 | 7.0545  | 1.5315  |
| 4/18/2019 15:14 | 15.2    | 15.3833 | 16.7733 | 15.8833 | 4.078  | 6.9667  | 1.5326  |
| 4/18/2019 15:15 | 15.1917 | 15.0833 | 16.8833 | 15.8333 | 4.068  | 6.95    | 1.5334  |
| 4/18/2019 15:16 | 15.1417 | 15.4583 | 16.66   | 15.7833 | 4.0273 | 7.1909  | 1.5321  |
| 4/18/2019 15:17 | 15.1083 | 15.5167 | 16.6383 | 15.75   | 3.9766 | 7.4     | 1.5728  |
| 4/18/2019 15:18 | 15.125  | 15.725  | 17.16   | 15.95   | 3.906  | 7.3909  | 1.5626  |
| 4/18/2019 15:19 | 15.2333 | 15.7417 | 16.5267 | 15.6667 | 3.8503 | 7.225   | 1.562   |
| 4/18/2019 15:20 | 15.2    | 15.55   | 17.0683 | 15.2333 | 3.8019 | 6.8333  | 1.5262  |
| 4/18/2019 15:21 | 15.275  | 15.9583 | 16.7333 | 15.6    | 3.7442 | 6.7727  | 1.5464  |
| 4/18/2019 15:22 | 15.3083 | 15.025  | 16.9883 | 15.6167 | 3.7358 | 6.64    | 1.5376  |
| 4/18/2019 15:23 | 15.4    | 14.9583 | 16.9467 | 15.4167 | 3.7885 | 6.5583  | 1.5313  |
| 4/18/2019 15:24 | 15.3667 | 15.5    | 17.0083 | 15.4833 | 3.8262 | 6.45    | 1.5321  |
| 4/18/2019 15:25 | 15.3417 | 15.575  | 17.2867 | 16.3667 | 3.7852 | 6.3     | 1.5245  |
| 4/18/2019 15:26 | 15.3917 | 15.3083 | 16.9217 | 16.2333 | 3.7452 | 6.3     | 1.5379  |
| 4/18/2019 15:27 | 15.3    | 15.4667 | 17.0833 | 15.8667 | 3.7353 | 6.5     | 1.4599  |
| 4/18/2019 15:28 | 15.2917 | 15.4667 | 16.8417 | 16.45   | 3.7534 | 6.34    | 1.3035  |
| 4/18/2019 15:29 | 15.2917 | 15.575  | 17.0283 | 16.1167 | 3.7817 | 6.2417  | 0.5119  |
| 4/18/2019 15:30 | 15.3333 | 14.9833 | 17.0517 | 15.6167 | 3.8289 | 6.41    | -0.131  |
| 4/18/2019 15:31 | 15.3727 | 15.3667 | 16.855  | 15.9667 | 3.8107 | 6.3     | -0.1571 |
| 4/18/2019 15:32 | 15.3083 | 15.475  | 16.8433 | 15.6333 | 3.79   | 6.3818  | 0.503   |
| 4/18/2019 15:33 | 15.2    | 14.4583 | 16.7767 | 15.45   | 3.788  | 6.3417  | 1.4173  |
| 4/18/2019 15:34 | 15.1    | 14.8833 | 16.9683 | 15.6833 | 3.8008 | 6.675   | 0.431   |
| 4/18/2019 15:35 | 15      | 15.2417 | 16.915  | 15.45   | 3.9359 | 6.8833  | -0.0098 |
| 4/18/2019 15:36 | 15.0833 | 14.7917 | 16.5817 | 14.9333 | 4.1298 | 7.02    | -0.0198 |
| 4/18/2019 15:37 | 14.9833 | 14.7167 | 16.6983 | 14.75   | 4.1444 | 7.425   | -0.0213 |
| 4/18/2019 15:38 | 15      | 15.375  | 17.2117 | 14.95   | 4.0874 | 7.4917  | 0.1014  |
| 4/18/2019 15:39 | 15.025  | 14.6583 | 16.9567 | 15.7333 | 4.003  | 7.2583  | 1.213   |
| 4/18/2019 15:40 | 15.1333 | 14.95   | 16.6517 | 16.1167 | 3.9691 | 7.0545  | 1.4841  |

|                 |         |         |         |         |        |         |        |         |
|-----------------|---------|---------|---------|---------|--------|---------|--------|---------|
| 4/18/2019 15:41 | 15.1833 | 14.4    | 16.91   | 16.15   | 3.9947 | 7.0333  |        | 1.4891  |
| 4/18/2019 15:42 | 15.025  | 14.4    | 16.3417 | 15.5    | 4.0405 | 7       |        | 1.4936  |
| 4/18/2019 15:43 | 14.7917 | 14.1333 | 15.9317 | 15.2167 | 4.0548 | 7.1091  |        | 1.5218  |
| 4/18/2019 15:44 | 14.5417 | -0.74   | 16.085  | 14.5    | 4.0842 | 7.4     |        | 1.5266  |
| 4/18/2019 15:45 | 14.5833 | 14.4167 | 16.0883 | 15      | 4.1395 | 7.72    |        | 1.5357  |
| 4/18/2019 15:46 | 14.7083 | 14.9    | 16.2783 | 14.9667 | 4.0968 | 7.85    |        | 1.5167  |
| 4/18/2019 15:47 | 14.875  | 14.4667 | 16.3817 | 15.05   | 4.1569 | 7.6727  |        | 1.5056  |
| 4/18/2019 15:48 | 14.8333 | 14.1833 | 15.9133 | 14.9667 | 4.2269 | 7.675   |        | 1.5043  |
| 4/18/2019 15:49 | 14.8083 | 13.9167 | 16.0367 | 14.3833 | 4.2454 | 7.5909  |        | 1.5211  |
| 4/18/2019 15:50 | 14.725  | 14.8667 | 16.2267 | 15.3667 | 4.2347 | 7.5083  |        | 1.5158  |
| 4/18/2019 15:51 | 14.7417 | 14.2333 | 15.995  | 15.1833 | 4.2852 | 7.6273  |        | 1.4738  |
| 4/18/2019 15:52 | 14.6833 | 14.4    | 15.7467 | 14.7333 | 4.3582 | 8       |        | 1.4806  |
| 4/18/2019 15:53 | 14.4917 | 13.8667 | 15.5133 | 14.25   | 4.3523 | 8.2909  |        | 1.4928  |
| 4/18/2019 15:54 | 14.025  | 12.4167 | 14.8267 | 13.9833 | 4.295  | 8.4182  |        | 1.5213  |
| 4/18/2019 15:55 | 13.4    | 12.3667 | 14.3033 | 12.25   | 4.2678 | 8.6833  |        | 1.524   |
| 4/18/2019 15:56 | 12.7917 | 12.35   | 13.53   | 11.6833 | 4.2798 | 8.9167  |        | 1.5152  |
| 4/18/2019 15:57 | 12.35   | 11.1167 | 14.045  | 12.2167 | 4.2995 | 8.7091  |        | 1.472   |
| 4/18/2019 15:58 | 12.0333 | 11.5    | 13.5267 | 11.4333 | 4.3    | 8.3833  |        | 1.5288  |
| 4/18/2019 15:59 | 11.7167 | 11.3167 | 13.4767 | 11.7167 | 4.2837 | 8.17    |        | 1.6418  |
| 4/18/2019 16:00 | 11.4083 | 11.55   | 13.1917 | 10.8167 | 4.2451 | 8.1636  |        | 3.0845  |
| 4/18/2019 16:01 | 11.0917 | 10.3833 | 12.4817 | 11.0833 | 4.2375 | 7.99    |        | 22.6425 |
| 4/18/2019 16:02 | 10.875  | 11.0167 | 12.78   | 11.3667 | 4.2174 | 7.9583  |        | 28.7683 |
| 4/18/2019 16:03 | 10.65   | 10.15   | 12.4167 | 10.3833 | 4.2367 | 7.9545  |        | 29.1892 |
| 4/18/2019 16:04 | 10.3833 | 9.8333  | 12.1108 | 9.3333  | 4.2308 | 7.9273  |        | 29.385  |
| 4/18/2019 16:05 | 10.1417 | 10.3    | 12.2892 | 9.8     | 4.2071 | 7.8818  |        | 26.0758 |
| 4/18/2019 16:06 | 10.0083 | 10.3    | 12.51   | 10.4333 | 4.2042 | 7.8917  |        | 5.817   |
| 4/18/2019 16:07 | 10      | 10      | 11.9925 | 10.1333 | 4.1839 | 7.7167  |        | 1.5125  |
| 4/18/2019 16:08 | 9.85    | 8.9667  | 11.8092 | 9.8667  | 4.1803 | 7.4833  |        | 1.4997  |
| 4/18/2019 16:09 | 9.65    | 8.9833  | 11.6625 | 9.9833  | 4.1727 | 7.49    |        | 1.5029  |
| 4/18/2019 16:10 | 9.4833  | 9.3833  | 11.5008 | 9.35    | 4.1532 | 7.7909  | 0.1641 | 1.4964  |
| 4/18/2019 16:11 | 9.2     | 8.5667  | 11.105  | 9.3     | 4.1284 | 8.2545  | 0.1731 | 1.5013  |
| 4/18/2019 16:12 | 9       | 8.3     | 11.1175 | 8.5333  | 4.1194 | 8.6818  | 0.1874 | 1.4988  |
| 4/18/2019 16:13 | 8.8     | 8.5     | 11.1367 | 9.05    | 4.1036 | 9.1273  | 0.1711 | 1.4999  |
| 4/18/2019 16:14 | 8.825   | 8.9833  | 10.9475 | 8.8833  | 4.0944 | 9.2417  | 0.1824 | 1.5108  |
| 4/18/2019 16:15 | 8.6583  | 8.7     | 11.0758 | 8.4167  | 4.0893 | 9.58    | 0.1693 | 1.5173  |
| 4/18/2019 16:16 | 8.6333  | 8.35    | 11.3675 | 8.9667  | 4.0918 | 9.6818  | 0.1789 | 1.519   |
| 4/18/2019 16:17 | 8.625   | 8.25    | 11.4917 | 8.9833  | 4.0947 | 10.0273 | 0.1861 | 1.4959  |
| 4/18/2019 16:18 | 8.6333  | 8.4833  | 10.8308 | 8.4     | 4.0713 | 10.3182 | 0.1699 | 1.4857  |
| 4/18/2019 16:19 | 8.3667  | 7.4833  | 10.1225 | 7.55    | 4.0456 | 10.9    | 0.1852 | 1.502   |
| 4/18/2019 16:20 | 7.9667  | 6.8     | 10.1708 | 7.6333  | 4.056  | 11.4778 | 0.1707 | 1.5183  |
| 4/18/2019 16:21 | 7.6083  | 6.9333  | 10.1258 | 7.6833  | 4.0121 | 11.9091 | 0.1795 | 1.5093  |
| 4/18/2019 16:22 | 7.3083  | 5.95    | 9.6153  | 6.9833  | 3.9967 | 12.3222 | 0.1794 | 1.5053  |
| 4/18/2019 16:23 | 6.975   | 5.65    | 9.2307  | 6.5333  | 3.9753 | 12.8182 | 0.1681 | 1.4905  |
| 4/18/2019 16:24 | 6.6583  | 6.4333  | 9.2332  | 6.6167  | 3.9366 | 13.07   | 0.1756 | 1.4942  |
| 4/18/2019 16:25 | 6.7     | 6.9     | 9.8994  | 7.3833  | 3.9565 | 13.05   | 0.18   | 1.5097  |
| 4/18/2019 16:26 | 6.8167  | 6.6667  | 9.8462  | 6.6167  | 3.9297 | 13.29   | 0.1783 | 1.5197  |
| 4/18/2019 16:27 | 6.975   | 7.0167  | 9.7588  | 6.0667  | 3.9408 | 13.6    | 0.18   | 1.5077  |

|                 |        |        |         |        |        |         |        |        |
|-----------------|--------|--------|---------|--------|--------|---------|--------|--------|
| 4/18/2019 16:28 | 6.7    | 5.9667 | 9.0702  | 6.0833 | 3.9125 | 13.82   | 0.1709 | 1.5161 |
| 4/18/2019 16:29 | 6.6333 | 6.5333 | 9.5072  | 6.7667 | 3.9251 | 14.1636 | 0.1788 | 1.5402 |
| 4/18/2019 16:30 | 6.4417 | 5.85   | 9.3414  | 6.1167 | 3.8982 | 14.4636 | 0.1728 | 1.5385 |
| 4/18/2019 16:31 | 6.4917 | 6.4667 | 9.0796  | 6.3667 | 3.8736 | 14.7167 | 0.1766 | 1.5281 |
| 4/18/2019 16:32 | 6.35   | 5.8333 | 9.8224  | 6.5833 | 3.8811 | 14.9417 | 0.1873 | 1.5012 |
| 4/18/2019 16:33 | 6.425  | 6.5667 | 10.1623 | 6.2    | 3.8858 | 15.1909 | 0.1666 | 1.5009 |
| 4/18/2019 16:34 | 6.25   | 5.2667 | 9.0621  | 5.0333 | 3.8418 | 15.4333 | 0.175  | 1.5059 |
| 4/18/2019 16:35 | 6.0917 | 5.5167 | 8.6623  | 5.35   | 3.8339 | 15.5091 | 0.1747 | 1.5043 |
| 4/18/2019 16:36 | 5.95   | 4.9833 | 8.8788  | 5.8667 | 3.8567 | 15.475  | 0.171  | 1.5305 |
| 4/18/2019 16:37 | 6.0583 | 6.1333 | 9.082   | 6.5167 | 3.8576 | 15.575  | 0.1822 | 1.5077 |
| 4/18/2019 16:38 | 6.1417 | 5.5167 | 9.0643  | 6.4333 | 3.8254 | 15.6333 | 0.167  | 1.5275 |
| 4/18/2019 16:39 | 6.1083 | 5.65   | 8.8752  | 6.3    | 3.8097 | 15.6    | 0.1748 | 1.5489 |
| 4/18/2019 16:40 | 6.075  | 5.45   | 8.8178  | 6.2833 | 3.7932 | 16.0455 | 0.1752 | 1.5361 |
| 4/18/2019 16:41 | 5.9909 | 5.2    | 8.7439  | 5.9    | 3.7866 | 16.1333 | 0.1675 | 1.5231 |
| 4/18/2019 16:42 | 5.9583 | 6.25   | 8.8208  | 5.9667 | 3.7899 | 16.3455 | 0.1841 | 1.5092 |
| 4/18/2019 16:43 | 5.8167 | 5.3333 | 8.4056  | 5.5167 | 3.7362 | 16.1818 | 0.1611 | 1.5298 |
| 4/18/2019 16:44 | 5.5833 | 5.2667 | 8.3093  | 4.8833 | 3.6337 | 15.8667 | 0.1806 | 1.5406 |
| 4/18/2019 16:45 | 5.2333 | 4.6667 | 7.7143  | 5.0667 | 3.6751 | 15.7833 | 0.1715 | 1.5224 |
| 4/18/2019 16:46 | 5      | 4.7667 | 8.1179  | 5.4    | 3.6707 | 16.075  | 0.1726 | 1.5345 |
| 4/18/2019 16:47 | 5.0833 | 5.2833 | 8.5518  | 5.2167 | 3.7309 | 16.3    | 0.1803 | 1.5103 |
| 4/18/2019 16:48 | 5.2417 | 4.8167 | 8.2858  | 5.55   | 3.7328 | 16.4909 | 0.1716 | 1.525  |
| 4/18/2019 16:49 | 5.3083 | 5.05   | 7.9567  | 4.9333 | 3.7091 | 17.0364 | 0.1782 | 1.5328 |
| 4/18/2019 16:50 | 5.0917 | 4.2667 | 7.8734  | 4.35   | 3.6082 | 17.4333 | 0.1755 | 1.547  |
| 4/18/2019 16:51 | 4.9667 | 4.7333 | 8.0754  | 5.05   | 3.6643 | 17.8727 | 0.1673 | 1.5418 |
| 4/18/2019 16:52 | 5.025  | 4.6    | 8.0088  | 5.0333 | 3.6601 | 18      | 0.185  | 1.5405 |
| 4/18/2019 16:53 | 5.1    | 5.4667 | 8.5712  | 5.0167 | 3.641  | 18.09   | 0.1663 | 1.5337 |
| 4/18/2019 16:54 | 5.025  | 4.55   | 7.8886  | 4.4833 | 3.6048 | 18.1364 | 0.1816 | 1.5353 |
| 4/18/2019 16:55 | 4.825  | 4.2    | 8.2483  | 4.45   | 3.465  | 18.3273 | 0.1711 | 1.5489 |
| 4/18/2019 16:56 | 4.6917 | 4.5333 | 7.7501  | 4.55   | 3.5516 | 18.8182 | 0.1661 | 1.5803 |
| 4/18/2019 16:57 | 4.6    | 3.6333 | 8.8186  | 4.85   | 3.5663 | 19.17   | 0.1792 | 1.5533 |
| 4/18/2019 16:58 | 4.5833 | 4.7833 | 7.6643  | 4.3667 | 3.5546 | 19.2    | 0.1615 | 1.5395 |
| 4/18/2019 16:59 | 4.5417 | 4.2    | 7.6627  | 4.3333 | 3.558  | 19.2    | 0.1784 | 1.5411 |
| 4/18/2019 17:00 | 4.6    | 4.3667 | 7.6993  | 4.3667 | 3.5671 | 19.2    | 0.172  | 1.545  |
| 4/18/2019 17:01 | 4.6    | 4.65   | 7.7208  | 4.3167 | 3.5872 | 19.2    | 0.1645 | 1.541  |
| 4/18/2019 17:02 | 4.4667 | 3.4333 | 7.2077  | 4.5333 | 3.4844 | 19.2    | 0.1773 | 1.5555 |
| 4/18/2019 17:03 | 4.3417 | 4.3333 | 7.3973  | 4.1167 | 3.488  | 19.2546 | 0.1637 | 1.5808 |
| 4/18/2019 17:04 | 4.2833 | 4.0167 | 7.2938  | 4      | 3.5347 | 19.3    | 0.1707 | 1.5675 |
| 4/18/2019 17:05 | 4.3    | 3.5333 | 7.5644  | 3.9333 | 3.5122 | 19.3833 | 0.1769 | 1.5495 |
| 4/18/2019 17:06 | 4.3    | 3.9667 | 7.2947  | 3.8    | 3.5274 | 19.4909 | 0.1663 | 1.5498 |
| 4/18/2019 17:07 | 4.3    | 4.3667 | 7.2858  | 4.2667 | 3.5098 | 19.5727 | 0.1797 | 1.5585 |
| 4/18/2019 17:08 | 4.3    | 3.7333 | 7.2118  | 3.8667 | 3.4985 | 19.6    | 0.1633 | 1.561  |
| 4/18/2019 17:09 | 4.25   | 3.9333 | 7.2844  | 3.6667 | 3.5108 | 19.6    | 0.1716 | 1.5508 |
| 4/18/2019 17:10 | 4.2    | 3.5667 | 7.1982  | 4.45   | 3.4713 | 19.6818 | 0.1688 | 1.5433 |
| 4/18/2019 17:11 | 4.1917 | 3.7    | 7.1692  | 3.65   | 3.4739 | 19.7417 | 0.1647 | 1.5499 |
| 4/18/2019 17:12 | 4.1    | 3.6667 | 6.9638  | 3.7    | 3.5086 | 19.8    | 0.1798 | 1.5515 |
| 4/18/2019 17:13 | 4.0417 | 3.7167 | 7.2991  | 3.6833 | 3.4658 | 19.8583 | 0.1584 | 1.5549 |
| 4/18/2019 17:14 | 4.0083 | 3.8667 | 7.1806  | 3.3333 | 3.4835 | 19.9    | 0.1744 | 1.5712 |

|                 |        |        |        |        |        |         |        |        |
|-----------------|--------|--------|--------|--------|--------|---------|--------|--------|
| 4/18/2019 17:15 | 4      | 3.55   | 7.3013 | 3.65   | 3.4731 | 19.9    | 0.1687 | 1.5673 |
| 4/18/2019 17:16 | 4      | 3.6167 | 7.1043 | 3.4833 | 3.482  | 19.8917 | 0.1618 | 1.5708 |
| 4/18/2019 17:17 | 3.8917 | 3.4167 | 7.2291 | 2.85   | 3.4438 | 19.8167 | 0.1805 | 1.5856 |
| 4/18/2019 17:18 | 3.8    | 3.4    | 6.9514 | 3.5    | 3.4603 | 19.9    | 0.1614 | 1.5856 |
| 4/18/2019 17:19 | 3.8    | 3.7667 | 7.2814 | 2.9167 | 3.4765 | 19.8727 | 0.1716 | 1.5777 |
| 4/18/2019 17:20 | 3.8167 | 3.0167 | 7.1723 | 3.1    | 3.4531 | 19.8    | 0.1638 | 1.6078 |
| 4/18/2019 17:21 | 3.7833 | 3.6167 | 7.2541 | 3.1167 | 3.4323 | 19.8667 | 0.1579 | 1.5983 |
| 4/18/2019 17:22 | 3.6917 | 3.7    | 7.0401 | 3.1333 | 3.4148 | 19.88   | 0.1751 | 1.5814 |
| 4/18/2019 17:23 | 3.6    | 2.9167 | 6.7337 | 3.8833 | 3.3974 | 19.8    | 0.1611 | 1.5794 |
| 4/18/2019 17:24 | 3.5833 | 3.1167 | 6.8843 | 3.2    | 3.356  | 19.8    | 0.1766 | 1.5778 |
| 4/18/2019 17:25 | 3.45   | 3.3333 | 7.5488 | 3.0167 | 3.343  | 19.775  | 0.1749 | 1.5664 |
| 4/18/2019 17:26 | 3.4083 | 3      | 6.7634 | 2.8167 | 3.3359 | 19.8    | 0.1649 | 1.5665 |
| 4/18/2019 17:27 | 3.4    | 3.0833 | 6.7753 | 2.75   | 3.3504 | 19.8833 | 0.1756 | 1.5851 |
| 4/18/2019 17:28 | 3.4    | 2.4    | 7.0972 | 3.0667 | 3.3547 | 19.9    | 0.1523 | 1.5681 |
| 4/18/2019 17:29 | 3.3833 | 2.85   | 6.7337 | 2.6333 | 3.3369 | 19.9917 | 0.1771 | 1.5691 |
| 4/18/2019 17:30 | 3.3417 | 2.9    | 6.7308 | 2.8333 | 3.3461 | 20      | 0.1662 | 1.5873 |
| 4/18/2019 17:31 | 3.3    | 3.4    | 6.7653 | 2.6167 | 3.3562 | 20      | 0.1563 | 1.5718 |
| 4/18/2019 17:32 | 3.275  | 1.9    | 6.6628 | 2.8167 | 3.3206 | 20      | 0.1732 | 1.5678 |
| 4/18/2019 17:33 | 3.1667 | 2.25   | 6.7185 | 2.9833 | 3.2922 | 20.05   | 0.1588 | 1.5712 |
| 4/18/2019 17:34 | 3.1    |        | 6.5717 | 2.3    | 3.272  | 20      | 0.1705 | 1.5829 |
| 4/18/2019 17:35 | 3.0417 |        | 6.6482 | 2.15   | 3.2666 | 20.1    | 0.1732 | 1.5992 |
| 4/18/2019 17:36 | 3.0167 | 2.7    | 6.686  | 2.6333 | 3.2581 | 20.1    | 0.162  | 1.58   |
| 4/18/2019 17:37 | 3.0417 | 2.3833 | 6.3718 | 2.8833 | 3.2797 | 20.2    | 0.1746 | 1.565  |
| 4/18/2019 17:38 | 3.0833 | 2.0333 | 6.85   | 2.8    | 3.2941 | 20.2    | 0.1618 | 1.5653 |
| 4/18/2019 17:39 | 3.0333 |        | 6.4333 | 2.0167 | 3.2605 | 20.2583 | 0.1696 | 1.5629 |
| 4/18/2019 17:40 | 2.95   | 2.45   | 6.384  | 2.4833 | 3.2268 | 20.1    | 0.1661 | 1.5748 |
| 4/18/2019 17:41 | 2.8833 | 2.4167 | 6.5558 | 2.1167 | 3.2193 | 19.9727 | 0.1608 | 1.5873 |
| 4/18/2019 17:42 | 2.8333 | 2.4    | 6.3763 | 1.8667 | 3.1986 | 19.9    | 0.1763 | 1.5881 |
| 4/18/2019 17:43 | 2.8083 | 2.5167 | 6.5003 | 2.35   | 3.193  | 19.925  | 0.1581 | 1.5688 |
| 4/18/2019 17:44 | 2.8    | 2.6167 | 6.6985 | 2.3667 | 3.1892 | 20      | 0.1662 | 1.586  |
| 4/18/2019 17:45 | 2.8    |        | 6.3267 | 2.75   | 3.2264 | 20      | 0.1651 | 1.5878 |
| 4/18/2019 17:46 | 2.875  |        | 6.5503 | 3.1167 | 3.2495 | 20      | 0.1651 | 1.5883 |
| 4/18/2019 17:47 | 2.9    |        | 6.499  | 2.25   | 3.1985 | 19.9583 | 0.1739 | 1.5862 |
| 4/18/2019 17:48 | 2.9    |        | 6.3098 | 1.8333 | 3.182  | 19.875  | 0.161  | 1.5886 |
| 4/18/2019 17:49 | 2.8417 |        | 6.2217 | 2.6    | 3.1876 | 19.7364 | 0.1733 | 1.5582 |
| 4/18/2019 17:50 | 2.8    |        | 6.6257 | 2.6333 | 3.2026 | 19.7    | 0.1632 | 1.5507 |
| 4/18/2019 17:51 | 2.8    |        | 6.481  | 2.5833 | 3.2213 | 19.7333 | 0.1632 | 1.5768 |
| 4/18/2019 17:52 | 2.8    |        | 6.1122 | 2.9    | 3.2007 | 19.8182 | 0.164  | 1.5965 |
| 4/18/2019 17:53 | 2.8    |        | 6.3015 | 2.45   | 3.1497 | 19.9    | 0.1543 | 1.5845 |
| 4/18/2019 17:54 | 2.775  |        | 6.149  | 2.3167 | 3.1538 | 19.9    | 0.1654 | 1.5778 |
| 4/18/2019 17:55 | 2.6583 |        | 6.4652 | 2.7667 | 3.1503 | 19.98   | 0.1627 | 1.5758 |
| 4/18/2019 17:56 | 2.6    |        | 6.21   | 2.4333 | 3.1388 | 19.8417 | 0.1619 | 1.5746 |
| 4/18/2019 17:57 | 2.5167 |        | 6.2905 | 2.3    | 3.0798 | 19.5909 | 0.164  | 1.5982 |
| 4/18/2019 17:58 | 2.4667 |        | 6.3017 | 1.2167 | 3.0944 | 19.0917 | 0.1541 | 1.6007 |
| 4/18/2019 17:59 | 2.4    |        | 6.3513 | 2.2333 | 3.0718 | 18.5364 | 0.1684 | 1.6053 |
| 4/18/2019 18:00 | 2.4    |        | 6.2518 | 2.0833 | 3.075  | 18.4    | 0.1565 | 1.5923 |
| 4/18/2019 18:01 | 2.4    |        | 6.2795 | 2.3833 | 3.089  | 18.2727 | 0.1539 | 1.582  |

|                 |        |        |        |        |        |         |        |        |
|-----------------|--------|--------|--------|--------|--------|---------|--------|--------|
| 4/18/2019 18:02 | 2.4583 | 3.5167 | 5.9837 | 1.7167 | 3.1214 | 18.2    | 0.171  | 1.5937 |
| 4/18/2019 18:03 | 2.4667 |        | 6.1577 | 1.6167 | 3.1105 | 17.9455 | 0.1528 | 1.6164 |
| 4/18/2019 18:04 | 2.3333 |        | 6.0407 | 1.9167 | 3.1205 | 17.2273 | 0.1688 | 1.6012 |
| 4/18/2019 18:05 | 2.2167 |        | 5.9507 | 2      | 3.0554 | 16.6636 | 0.1604 | 1.5975 |
| 4/18/2019 18:06 | 2.2    | 1.7714 | 6.1227 | 1.85   | 3.0948 | 16.175  | 0.1562 | 1.5933 |
| 4/18/2019 18:07 | 2.2    | 1.3667 | 5.9838 | 1.7333 | 3.0828 | 16.1    | 0.1686 | 1.5897 |
| 4/18/2019 18:08 | 2.2167 | 2.225  | 5.8667 | 2.35   | 3.0807 | 16.125  | 0.1547 | 1.5648 |
| 4/18/2019 18:09 | 2.2    | 1.7667 | 5.8252 | 1.8833 | 3.0884 | 16.075  | 0.164  | 1.5788 |
| 4/18/2019 18:10 | 2.2    | 2.4417 | 5.932  | 1.4833 | 3.1145 | 16.0667 | 0.1613 | 1.5995 |
| 4/18/2019 18:11 | 2.2083 | 2.125  | 6.0613 | 1.7667 | 3.0827 | 15.8417 | 0.1542 | 1.6137 |
| 4/18/2019 18:12 | 2.2    | 2.2417 | 5.9982 | 1.7667 | 3.0608 | 15.5583 | 0.1658 | 1.5959 |
| 4/18/2019 18:13 | 2.2    | 2.375  | 6.2128 | 1.3167 | 3.0505 | 15.4364 | 0.1552 | 1.5976 |
| 4/18/2019 18:14 | 2.1    | 1.3917 | 6.1943 | 1.7    | 3.0429 | 15.5    | 0.1656 | 1.6146 |
| 4/18/2019 18:15 | 2.1    | 1.5667 | 6.0743 | 1.65   | 3.0517 | 15.5727 | 0.1677 | 1.6175 |
| 4/18/2019 18:16 | 2.1    | 1.9667 | 6.0248 | 1.8333 | 3.0685 | 16.0417 | 0.1599 | 1.6195 |
| 4/18/2019 18:17 | 2.1    | 1.9833 | 5.906  | 1.2    | 3.06   | 16.2818 | 0.167  | 1.6408 |
| 4/18/2019 18:18 | 2.1    | 2      | 6.0218 | 2.1833 | 3.0401 | 16.4833 | 0.1605 | 1.6423 |
| 4/18/2019 18:19 | 2.0417 | 0.975  | 6.1743 | 1.2167 | 3.0104 | 16.1273 | 0.1588 | 1.6213 |
| 4/18/2019 18:20 | 2      | 1.4667 | 5.7503 | 1.6833 | 3.0273 | 15.7    | 0.1633 | 1.6177 |
| 4/18/2019 18:21 | 2.0333 | 1.2917 | 5.9558 | 1.3667 | 3.0427 | 15.52   | 0.1491 | 1.5997 |
| 4/18/2019 18:22 | 2.1    | 1.6417 | 6.0675 | 1.4667 | 3.0198 | 15.7    | 0.1596 | 1.5812 |
| 4/18/2019 18:23 | 2.1    | 1.025  | 5.8538 | 1.65   | 3.0174 | 16.3273 | 0.1527 | 1.5953 |
| 4/18/2019 18:24 | 2.0667 | 1.8833 | 5.8945 | 0.9833 | 3.0043 | 17.025  | 0.1636 | 1.5853 |
| 4/18/2019 18:25 | 2      | 1.625  | 6.0118 | 1.1833 | 2.9833 | 17.3455 | 0.1566 | 1.5834 |
| 4/18/2019 18:26 | 2      | 1.6583 | 6.0647 | 1.7667 | 2.9688 | 17.3167 | 0.1465 | 1.5866 |
| 4/18/2019 18:27 | 1.9917 | 1.3    | 5.8402 | 1.05   | 2.9404 | 16.94   | 0.1641 | 1.6167 |
| 4/18/2019 18:28 | 1.9167 | 1.6583 | 5.9805 | 1.0167 | 2.9787 | 16.65   | 0.1563 | 1.617  |
| 4/18/2019 18:29 | 1.875  | 2.225  | 5.8605 | 1.4167 | 2.9938 | 16.4546 | 0.156  | 1.6507 |
| 4/18/2019 18:30 | 1.8    | 1.7    | 5.8382 | 1.3167 | 2.943  | 16.5    | 0.1586 | 1.6373 |
| 4/18/2019 18:31 | 1.8    | 1.8667 | 5.7122 | 1.55   | 2.9542 | 16.6545 | 0.1438 | 1.6053 |
| 4/18/2019 18:32 | 1.8    | 0.95   | 5.9302 | 1      | 2.9472 | 16.7455 | 0.1616 | 1.6158 |
| 4/18/2019 18:33 | 1.775  | 1.6917 | 5.7838 | 1.1    | 2.9319 | 16.96   | 0.1568 | 1.6189 |
| 4/18/2019 18:34 | 1.7583 | 1.1833 | 6.0395 | 1.0667 | 2.8938 | 17.0909 | 0.152  | 1.624  |
| 4/18/2019 18:35 | 1.7    | 1.1333 | 5.8688 | 1.65   | 2.9114 | 16.7182 | 0.1653 | 1.6241 |
| 4/18/2019 18:36 | 1.7    | 0.7917 | 5.7348 | 0.6    | 2.8979 | 16.4546 | 0.1474 | 1.6205 |
| 4/18/2019 18:37 | 1.7    | 1.4417 | 5.7462 | 0.9167 | 2.9083 | 16.3833 | 0.165  | 1.6091 |
| 4/18/2019 18:38 | 1.7    | 1.6917 | 5.6335 | 1.1167 | 2.9183 | 16.575  | 0.163  | 1.6303 |
| 4/18/2019 18:39 | 1.6833 | 1.0583 | 5.5813 | 1.9667 | 2.8845 | 16.675  | 0.1519 | 1.6488 |
| 4/18/2019 18:40 | 1.6667 | 1.2167 | 5.667  | 1.25   | 2.8863 | 17      | 0.1612 | 1.6325 |
| 4/18/2019 18:41 | 1.6833 | 1.3333 | 5.7032 | 0.6667 | 2.9029 | 17.47   | 0.1464 | 1.6003 |
| 4/18/2019 18:42 | 1.7    | 0.95   | 5.8382 | 0.9167 | 2.8768 | 17.7    | 0.1579 | 1.6022 |
| 4/18/2019 18:43 | 1.7167 | 1.1417 | 5.6378 | 1.0167 | 2.8534 | 17.6083 | 0.1612 | 1.6309 |
| 4/18/2019 18:44 | 1.7167 | 1.25   | 5.8688 | 1.0333 | 2.8453 | 17.3333 | 0.1505 | 1.6124 |
| 4/18/2019 18:45 | 1.6583 | 0.925  | 5.9182 | 1.0333 | 2.8037 | 16.8818 | 0.1618 | 1.6199 |
| 4/18/2019 18:46 | 1.6    | 0.4083 | 5.6575 | 1.15   | 2.8142 | 16.4333 | 0.1497 | 1.6147 |
| 4/18/2019 18:47 | 1.6    | 1.0417 | 5.7908 | 1.15   | 2.8444 | 16.3667 | 0.1589 | 1.6221 |
| 4/18/2019 18:48 | 1.6    | 1.2667 | 5.8123 | 1.2167 | 2.846  | 16.05   | 0.1508 | 1.6155 |

|                 |        |        |        |        |        |         |        |        |
|-----------------|--------|--------|--------|--------|--------|---------|--------|--------|
| 4/18/2019 18:49 | 1.6    | 0.6667 | 6.5492 | 1.5    | 2.8134 | 15.84   | 0.1525 | 1.6146 |
| 4/18/2019 18:50 | 1.6    | 1.6417 | 5.5998 | 0.8667 | 2.8113 | 15.6636 | 0.1699 | 1.6028 |
| 4/18/2019 18:51 | 1.5833 | 1.4167 | 5.7823 | 1.3167 | 2.8284 | 15.6083 | 0.149  | 1.6378 |
| 4/18/2019 18:52 | 1.6    | 1.2083 | 5.9033 | 1.6333 | 2.8204 | 15.2583 | 0.1574 | 1.6631 |
| 4/18/2019 18:53 | 1.6    | 1.1833 | 5.715  | 1.35   | 2.8223 | 15.05   | 0.1499 | 1.64   |
| 4/18/2019 18:54 | 1.6    | 1.6667 | 5.8223 | 1.25   | 2.7943 | 14.7909 | 0.1455 | 1.634  |
| 4/18/2019 18:55 | 1.6    | 1.375  | 5.5773 | 0.85   | 2.84   | 14.7833 | 0.1548 | 1.6149 |
| 4/18/2019 18:56 | 1.6    | 1.6    | 5.768  | 1.3667 | 2.831  | 15.1818 | 0.1487 | 1.6078 |
| 4/18/2019 18:57 | 1.5917 | 1.3333 | 5.4443 | 1      | 2.8199 | 15.7455 | 0.1592 | 1.6169 |
| 4/18/2019 18:58 | 1.5    | 1.4333 | 5.5367 | 0.7    | 2.8153 | 16.15   | 0.1524 | 1.6155 |
| 4/18/2019 18:59 | 1.5    | 1.125  | 5.5523 | 0.9333 | 2.8051 | 16.6556 | 0.1521 | 1.6088 |
| 4/18/2019 19:00 | 1.5    | 1.0333 | 5.5097 | 0.6833 | 2.7847 | 16.9917 | 0.1586 | 1.6146 |
| 4/18/2019 19:01 | 1.5    | 0.6583 | 5.637  | 0.7667 | 2.779  | 16.9556 | 0.1423 | 1.628  |
| 4/18/2019 19:02 | 1.4167 | 0.5917 | 5.519  | 0.7333 | 2.7739 | 16.6364 | 0.1569 | 1.611  |
| 4/18/2019 19:03 | 1.4    | 0.7167 | 5.4902 | 0.8    | 2.7808 | 16.1    | 0.1496 | 1.6054 |
| 4/18/2019 19:04 | 1.3333 | 0.7    | 5.601  | 0.65   | 2.7924 | 16.0583 | 0.1472 | 1.6275 |
| 4/18/2019 19:05 | 1.3917 | 0.6083 | 5.4782 | 0.7667 | 2.7783 | 15.8667 | 0.154  | 1.6024 |
| 4/18/2019 19:06 | 1.4    | 0.7833 | 5.5248 | 0.75   | 2.7461 | 15.725  | 0.1429 | 1.5913 |
| 4/18/2019 19:07 | 1.4417 | 1.45   | 5.3927 | 0.7167 | 2.7442 | 15.7909 | 0.1563 | 1.6267 |
| 4/18/2019 19:08 | 1.4167 | 0.9667 | 5.6727 | 1.05   | 2.6863 | 15.6    | 0.154  | 1.6608 |
| 4/18/2019 19:09 | 1.3417 | 0.9333 | 5.6276 | 0.7    | 2.7145 | 15.1182 | 0.1441 | 1.6567 |
| 4/18/2019 19:10 | 1.2917 | 1.5    | 5.781  | 1.2833 | 2.7515 | 14.8727 | 0.1558 | 1.6364 |
| 4/18/2019 19:11 | 1.275  | 0.7417 | 5.4835 | 0.7667 | 2.7649 | 14.65   | 0.1433 | 1.6382 |
| 4/18/2019 19:12 | 1.3    | 1.3667 | 5.4081 | 1.3333 | 2.7383 | 14.5909 | 0.1546 | 1.6212 |
| 4/18/2019 19:13 | 1.3    | 0.8917 | 5.7181 | 1.3667 | 2.6964 | 15.0636 | 0.1515 | 1.6121 |
| 4/18/2019 19:14 | 1.3    | 0.975  | 5.9614 | 1.5333 | 2.7287 | 15.375  | 0.1478 | 1.6347 |
| 4/18/2019 19:15 | 1.3167 | 1.0417 | 5.4828 | 1.0833 | 2.7431 | 16.0364 | 0.1583 | 1.6185 |
| 4/18/2019 19:16 | 1.375  | 0.65   | 5.5928 | 0.8    | 2.7296 | 16.3    | 0.1453 | 1.6633 |
| 4/18/2019 19:17 | 1.3167 | 1.225  | 5.346  | 0.1667 | 2.7093 | 16.34   | 0.1554 | 1.6518 |
| 4/18/2019 19:18 | 1.3    | 1.0833 | 5.5936 | 0.2833 | 2.7248 | 16.65   | 0.1489 | 1.6727 |
| 4/18/2019 19:19 | 1.3    | 0.6167 | 5.5018 | 0.7    | 2.7034 | 16.8364 | 0.1455 | 1.6289 |
| 4/18/2019 19:20 | 1.3    | 0.6417 | 5.4658 | 0.3    | 2.7349 | 16.9417 | 0.1564 | 1.6121 |
| 4/18/2019 19:21 | 1.3083 | 0.8917 | 5.6548 | 0.4833 | 2.6932 | 16.925  | 0.1466 | 1.6434 |
| 4/18/2019 19:22 | 1.2417 | 1.2    | 5.5955 | 0.7333 | 2.6649 | 17.1583 | 0.163  | 1.6454 |
| 4/18/2019 19:23 | 1.2    | 0.6667 | 5.3349 | 0.6    | 2.6647 | 16.84   | 0.1423 | 1.6406 |
| 4/18/2019 19:24 | 1.2417 | 0.6833 | 5.4088 | 1.05   | 2.6615 | 16.9546 | 0.1571 | 1.6598 |
| 4/18/2019 19:25 | 1.3    | 0.8583 | 5.1243 | 0.85   | 2.6618 | 16.33   | 0.1572 | 1.6518 |
| 4/18/2019 19:26 | 1.3    | 0.9417 | 5.5421 | 1.0167 | 2.7084 | 16.0667 | 0.1463 | 1.6538 |
| 4/18/2019 19:27 | 1.3    | 1.7667 | 5.4492 | 0.25   | 2.6694 | 15.8167 | 0.1668 | 1.6495 |
| 4/18/2019 19:28 | 1.3    | 1.3333 | 5.3498 | 1.5    | 2.6758 | 15.85   | 0.1466 | 1.6581 |
| 4/18/2019 19:29 | 1.3    | 0.3083 | 5.2923 | 0.7333 | 2.7032 | 16.0833 | 0.1548 | 1.6625 |
| 4/18/2019 19:30 | 1.3167 | 0.775  | 5.1433 | 0.75   | 2.7058 | 16.2583 | 0.1544 | 1.635  |
| 4/18/2019 19:31 | 1.375  | 0.7    | 5.2675 | 0.7167 | 2.6943 | 15.9917 | 0.1467 | 1.6431 |
| 4/18/2019 19:32 | 1.3727 | 0.65   | 5.2684 | 0.4333 | 2.6698 | 15.7818 | 0.1588 | 1.6601 |
| 4/18/2019 19:33 | 1.325  | 0.4    | 5.6362 | 0.8333 | 2.677  | 15.7083 | 0.1527 | 1.6678 |
| 4/18/2019 19:34 | 1.3    | 0.3333 | 5.144  | 0.7333 | 2.6793 | 15.8182 | 0.1589 | 1.6532 |
| 4/18/2019 19:35 | 1.3    | 0.1333 | 5.1393 | 0.2    | 2.68   | 16.0083 | 0.1645 | 1.6471 |

|                 |        |         |        |         |        |         |        |        |
|-----------------|--------|---------|--------|---------|--------|---------|--------|--------|
| 4/18/2019 19:36 | 1.25   | 0.3417  | 5.6975 | 0.9333  | 2.705  | 16.1818 | 0.1496 | 1.6292 |
| 4/18/2019 19:37 | 1.2    | 0.2667  | 5.3316 | 0.4333  | 2.7048 | 16.65   | 0.1651 | 1.6501 |
| 4/18/2019 19:38 | 1.2    | 0.9917  | 5.3086 | 0.3833  | 2.6828 | 17.2    | 0.1502 | 1.6611 |
| 4/18/2019 19:39 | 1.2    | 0.325   | 5.0782 | 0.5833  | 2.6968 | 17.5818 | 0.1592 | 1.6623 |
| 4/18/2019 19:40 | 1.2    | 0.45    | 5.2453 | 1       | 2.7063 | 17.7546 | 0.1647 | 1.6602 |
| 4/18/2019 19:41 | 1.2    | 0.1333  | 5.4464 | 0.5167  | 2.7221 | 17.81   | 0.1468 | 1.6422 |
| 4/18/2019 19:42 | 1.2167 | 0.3     | 5.6266 | 0.45    | 2.6863 | 17.9182 | 0.17   | 1.6511 |
| 4/18/2019 19:43 | 1.2333 | 0.3667  | 5.5349 | 0.8     | 2.6992 | 18.2778 | 0.1431 | 1.6568 |
| 4/18/2019 19:44 | 1.2    | 0.275   | 5.2808 | 0.65    | 2.7027 | 18.3818 | 0.1553 | 1.6997 |
| 4/18/2019 19:45 | 1.125  | 0.425   | 5.205  | 0.2333  | 2.7021 | 18.6727 | 0.1557 | 1.6753 |
| 4/18/2019 19:46 | 1.1    | 0.5333  | 5.1044 | 0.3667  | 2.7156 | 19.0167 | 0.1566 | 1.6516 |
| 4/18/2019 19:47 | 1.1    | 0.775   | 5.3413 | -0.3333 | 2.701  | 19.2909 | 0.1589 | 1.6456 |
| 4/18/2019 19:48 | 1.1    | 1.5583  | 4.9393 | 0.2833  | 2.7146 | 19.0455 | 0.1438 | 1.6289 |
| 4/18/2019 19:49 | 1.1    | -0.0917 | 5.4404 | 0.5333  | 2.7113 | 18.82   | 0.1566 | 1.6338 |
| 4/18/2019 19:50 | 1.1    | 0.1083  | 5.2589 | 0.4833  | 2.7008 | 18.5167 | 0.1591 | 1.6169 |
| 4/18/2019 19:51 | 1.1    | 1.1917  | 5.1682 | 0.6667  | 2.7143 | 18.4546 | 0.149  | 1.6475 |
| 4/18/2019 19:52 | 1.1    | 1.2167  | 5.3743 | 0.1667  | 2.7272 | 18.4583 | 0.1524 | 1.6629 |
| 4/18/2019 19:53 | 1.1    | 0.6167  | 5.2884 | 0.9667  | 2.7331 | 18.5    | 0.1464 | 1.6623 |
| 4/18/2019 19:54 | 1.1    | 0.8167  | 5.2733 | 0.2667  | 2.7018 | 18.5    | 0.1497 | 1.6621 |
| 4/18/2019 19:55 | 1.1167 | 0.2833  | 5.3769 | 0.8667  | 2.7388 | 18.59   | 0.1601 | 1.6608 |
| 4/18/2019 19:56 | 1.1833 | 0.75    | 5.172  | 0.6     | 2.7546 | 18.9167 | 0.1474 | 1.6753 |
| 4/18/2019 19:57 | 1.1833 | 0.225   | 5.2096 | 0.6333  | 2.7317 | 19.2455 | 0.1582 | 1.6678 |
| 4/18/2019 19:58 | 1.125  | 0.2417  | 5.0386 | 0.5667  | 2.7442 | 19.36   | 0.1367 | 1.6493 |
| 4/18/2019 19:59 | 1.1    | 0.3167  | 5.0506 | 0.6833  | 2.7717 | 19.4727 | 0.1528 | 1.6442 |
| 4/18/2019 20:00 | 1.1917 | 0.35    | 4.9361 | 0.5667  | 2.7498 | 20      | 0.1515 | 1.6399 |
| 4/18/2019 20:01 | 1.2    | 1.6167  | 5.0008 | 0.55    | 2.7645 | 20.5455 | 0.1475 | 1.6503 |
| 4/18/2019 20:02 | 1.2    | 1.2417  | 5.3322 | -0.1333 | 2.782  | 20.9333 | 0.1629 | 1.6565 |
| 4/18/2019 20:03 | 1.175  | 1.175   | 5.3908 | 0.55    | 2.7859 | 21.0167 | 0.1507 | 1.6561 |
| 4/18/2019 20:04 | 1.2    | 0.8167  | 5.1398 | 0.5     | 2.8431 | 21.1917 | 0.1521 | 1.6405 |
| 4/18/2019 20:05 | 1.175  | 0.4583  | 5.1157 | 0.7     | 2.8608 | 21.32   | 0.1494 | 1.6268 |
| 4/18/2019 20:06 | 1.1917 | -0.3167 | 4.8015 | 0.3667  | 2.8701 | 21.4182 | 0.1456 | 1.6368 |
| 4/18/2019 20:07 | 1.1167 | 0.4167  | 5.1823 | 0.5833  | 2.8238 | 21.5417 | 0.1517 | 1.6449 |
| 4/18/2019 20:08 | 1.1417 | 0.0917  | 4.9803 | 0.75    | 2.8851 | 21.625  | 0.1405 | 1.6413 |
| 4/18/2019 20:09 | 1.15   | 1.1833  | 4.951  | 0.25    | 2.8955 | 21.7364 | 0.155  | 1.6601 |
| 4/18/2019 20:10 | 1.1    | 0.7333  | 5.0838 | 0.4667  | 2.8788 | 21.8    | 0.1476 | 1.6881 |
| 4/18/2019 20:11 | 1.1    | -0.0833 | 5.1021 | 0.1167  | 2.8827 | 21.8    | 0.1466 | 1.6853 |
| 4/18/2019 20:12 | 1.1    | 0.8667  | 4.6658 | 0.25    | 2.8943 | 21.8    | 0.1553 | 1.6605 |
| 4/18/2019 20:13 | 1.1    | 0.7083  | 4.9437 | -0.1    | 2.9055 | 21.8182 | 0.1398 | 1.6662 |
| 4/18/2019 20:14 | 1.0333 | 0.3     | 5.1696 | 0.2     | 2.8978 | 21.9    | 0.1545 | 1.66   |
| 4/18/2019 20:15 | 1      | 0.1167  | 5.0093 | 0.0833  | 2.9222 | 21.9167 | 0.1468 | 1.6428 |
| 4/18/2019 20:16 | 1      | 0.425   | 4.9065 | -0.1333 | 2.9075 | 21.9091 | 0.1471 | 1.6787 |
| 4/18/2019 20:17 | 1      | 0.375   | 5.2659 | 0.1333  | 2.9134 | 21.9546 | 0.1594 | 1.6958 |
| 4/18/2019 20:18 | 1      | 0.2167  | 4.9781 | 0.1667  | 2.9311 | 22.025  | 0.1416 | 1.6733 |
| 4/18/2019 20:19 | 1      | 0.6     | 4.7168 | 0.0167  | 2.9443 | 22      | 0.1519 | 1.6318 |
| 4/18/2019 20:20 | 1      | 0.2333  | 5.3801 | 0.4833  | 2.919  | 22      | 0.1535 | 1.6401 |
| 4/18/2019 20:21 | 1      | 0.7833  | 5.0886 | 0.0167  | 2.943  | 21.9636 | 0.1499 | 1.6363 |
| 4/18/2019 20:22 | 1      | 0       | 5.0108 | -0.1    | 2.9369 | 21.8583 | 0.1601 | 1.6538 |



|                 |        |         |        |         |        |         |        |        |
|-----------------|--------|---------|--------|---------|--------|---------|--------|--------|
| 4/18/2019 20:23 | 1      | 0.5583  | 4.9928 | 1.0167  | 2.9534 | 21.8273 | 0.1389 | 1.6632 |
| 4/18/2019 20:24 | 1      | -0.05   | 5.1204 | 0.2333  | 2.9702 | 21.9    | 0.1586 | 1.6853 |
| 4/18/2019 20:25 | 1      | 0.5583  | 5.0038 | 0.4667  | 2.9639 | 21.8636 | 0.1505 | 1.6841 |
| 4/18/2019 20:26 | 1      | -0.025  | 4.7588 | 0.25    | 2.9443 | 21.8167 | 0.1464 | 1.684  |
| 4/18/2019 20:27 | 0.9    | 0.8     | 4.6315 | 0.4667  | 2.9679 | 21.9    | 0.1538 | 1.7008 |
| 4/18/2019 20:28 | 0.9    | 0.2917  | 4.6016 | 0.55    | 2.9682 | 21.8727 | 0.1434 | 1.6836 |
| 4/18/2019 20:29 | 0.8333 | 0.15    | 4.8231 | 0.55    | 2.9744 | 21.7833 | 0.1506 | 1.6783 |
| 4/18/2019 20:30 | 0.8833 | -0.0417 | 4.9204 | 0.0333  | 2.9594 | 21.725  | 0.1506 | 1.6957 |
| 4/18/2019 20:31 | 0.8667 | 0.6667  | 4.7585 | 0.7833  | 2.9722 | 21.7    | 0.1409 | 1.6904 |
| 4/18/2019 20:32 | 0.8273 | 0.675   | 5.0029 | 0.4     | 2.9699 | 21.7    | 0.158  | 1.6838 |
| 4/18/2019 20:33 | 0.8083 | 0.65    | 4.7892 | 0.4667  | 2.9572 | 21.7818 | 0.1427 | 1.6739 |
| 4/18/2019 20:34 | 0.8    | 0.4417  | 4.9765 | 0.3167  | 2.9678 | 21.925  | 0.1588 | 1.6434 |
| 4/18/2019 20:35 | 0.725  | -0.75   | 5.0363 | 0.7667  | 3.0013 | 21.9    | 0.1502 | 1.6268 |
| 4/18/2019 20:36 | 0.7    | 0.275   | 5.0443 | -0.2833 | 2.9942 | 21.9    | 0.1477 | 1.6524 |
| 4/18/2019 20:37 | 0.7    | 0.1583  | 4.7735 | 0.0333  | 2.9787 | 21.9    | 0.1519 | 1.6733 |
| 4/18/2019 20:38 | 0.7    | -0.0583 | 4.558  | 0.4     | 2.9633 | 21.9    | 0.1399 | 1.6803 |
| 4/18/2019 20:39 | 0.7    | -0.0667 | 4.903  | -0.2333 | 2.9814 | 21.9    | 0.1593 | 1.6722 |
| 4/18/2019 20:40 | 0.7    | 0.025   | 4.7705 | -0.1833 | 2.982  | 21.9083 | 0.1487 | 1.6746 |
| 4/18/2019 20:41 | 0.6833 | 0.3833  | 4.709  | 0.3     | 2.9827 | 22.05   | 0.1473 | 1.6646 |
| 4/18/2019 20:42 | 0.6    | 0.5333  | 4.9557 | -0.0167 | 2.9863 | 22.1    | 0.1563 | 1.6635 |
| 4/18/2019 20:43 | 0.5583 | 0.6083  | 4.7548 | -0.3667 | 2.9965 | 22.1818 | 0.1422 | 1.6663 |
| 4/18/2019 20:44 | 0.5    | 0.6167  | 5.0158 | 0.3     | 2.9973 | 22.1417 | 0.1605 | 1.665  |
| 4/18/2019 20:45 | 0.5    | 0.4667  | 4.8245 | 0.1     | 3.0103 | 22.1    | 0.1445 | 1.6506 |
| 4/18/2019 20:46 | 0.5167 | 0.4667  | 4.5852 | 0.4167  | 3.0129 | 22.1    | 0.1538 | 1.6407 |
| 4/18/2019 20:47 | 0.6    | 0.625   | 4.5013 | -0.0167 | 2.9827 | 22.1583 | 0.1557 | 1.6482 |
| 4/18/2019 20:48 | 0.6    | 0.4167  | 4.9107 | 0.0333  | 2.9747 | 22.2    | 0.1436 | 1.6702 |
| 4/18/2019 20:49 | 0.6    | 0.325   | 4.7982 | -0.4667 | 2.9923 | 22.2917 | 0.1554 | 1.6676 |
| 4/18/2019 20:50 | 0.6167 | 1.2167  | 4.8555 | 0.25    | 3.0239 | 22.2    | 0.1436 | 1.6754 |
| 4/18/2019 20:51 | 0.6    | 0.3     | 5.2103 | 0.2667  | 2.9879 | 22.2    | 0.1479 | 1.672  |
| 4/18/2019 20:52 | 0.6    | -0.3167 | 4.9472 | 0.0333  | 3.006  | 22.2909 | 0.1527 | 1.6736 |
| 4/18/2019 20:53 | 0.6    | 0.5333  | 4.5532 | -0.3833 | 2.9992 | 22.275  | 0.1459 | 1.6933 |
| 4/18/2019 20:54 | 0.6167 | 0.7083  | 5.1862 | 0.2167  | 2.9858 | 22.19   | 0.153  | 1.6848 |
| 4/18/2019 20:55 | 0.6417 | 0.0333  | 4.8018 | -0.0667 | 2.993  | 21.85   | 0.1414 | 1.6878 |
| 4/18/2019 20:56 | 0.6333 | 0.0167  | 4.7745 | -0.05   | 3.0155 | 21.1    | 0.1516 | 1.6772 |
| 4/18/2019 20:57 | 0.6917 | 0.45    | 4.8503 | 0.0333  | 2.9942 | 20.5182 | 0.1491 | 1.6599 |
| 4/18/2019 20:58 | 0.6583 | 0.4917  | 4.885  | 0.2833  | 3.0193 | 20.3364 | 0.1398 | 1.6458 |
| 4/18/2019 20:59 | 0.6333 | 0.95    | 4.7522 | -0.2833 | 2.9765 | 19.9417 | 0.1513 | 1.6692 |
| 4/18/2019 21:00 | 0.65   | 0.0667  | 4.4103 | 0.2833  | 3.0148 | 19.8455 | 0.1404 | 1.7076 |
| 4/18/2019 21:01 | 0.7    | 0.325   | 4.7445 | -0.2667 | 3.0062 | 19.7909 | 0.1494 | 1.6903 |
| 4/18/2019 21:02 | 0.7    | -0.0167 | 4.4695 | -0.2167 | 2.9941 | 19.7    | 0.1507 | 1.6678 |
| 4/18/2019 21:03 | 0.7417 | -0.5333 | 4.7352 | 0.1833  | 2.99   | 19.6818 | 0.1439 | 1.6713 |
| 4/18/2019 21:04 | 0.7    | -0.3917 | 4.8818 | 0.3333  | 2.9901 | 19.6    | 0.1532 | 1.6953 |
| 4/18/2019 21:05 | 0.7    | 0.175   | 4.5982 | 0       | 3.0141 | 19.6    | 0.1349 | 1.7051 |
| 4/18/2019 21:06 | 0.6333 | -0.075  | 4.7778 | 0.3667  | 3.0203 | 19.6    | 0.1541 | 1.6928 |
| 4/18/2019 21:07 | 0.6    | 0.25    | 4.6783 | -0.25   | 3.0081 | 19.8    | 0.1472 | 1.6863 |
| 4/18/2019 21:08 | 0.6417 | -0.35   | 4.8015 | -0.1    | 3.0233 | 20.4833 | 0.1416 | 1.6894 |
| 4/18/2019 21:09 | 0.6917 | 0.2083  | 4.7068 | 0.05    | 3.0431 | 21.1333 | 0.1555 | 1.674  |

|                 |        |         |        |         |        |         |        |        |
|-----------------|--------|---------|--------|---------|--------|---------|--------|--------|
| 4/18/2019 21:10 | 0.7    | -0.1167 | 4.724  | -0.5667 | 3.0413 | 21.2818 | 0.1434 | 1.6838 |
| 4/18/2019 21:11 | 0.7    | 0.6583  | 5.0088 | -0.3    | 3.0238 | 21.6818 | 0.1532 | 1.6741 |
| 4/18/2019 21:12 | 0.7    | 0.3083  | 4.8647 | 0.5833  | 3.0266 | 21.8    | 0.1472 | 1.6739 |
| 4/18/2019 21:13 | 0.7    | -0.45   | 4.4973 | 0       | 3.0455 | 21.8917 | 0.1472 | 1.6924 |
| 4/18/2019 21:14 | 0.7    | 0.0083  | 4.7598 | 0.4     | 3.0468 | 22.0091 | 0.1509 | 1.6968 |
| 4/18/2019 21:15 | 0.6    | -0.35   | 4.9083 | -0.0167 | 3.0438 | 22.1    | 0.1433 | 1.6778 |
| 4/18/2019 21:16 | 0.6    | -0.4917 | 4.5745 | -0.1667 | 3.0481 | 22.1    | 0.1602 | 1.6585 |
| 4/18/2019 21:17 | 0.6417 | -0.4917 | 4.6632 | 0.05    | 3.0633 | 22.1    | 0.147  | 1.6743 |
| 4/18/2019 21:18 | 0.7    | 0.0917  | 4.8665 | 0.5     | 3.0701 | 22.1    | 0.1478 | 1.6534 |
| 4/18/2019 21:19 | 0.7    | 0.0667  | 4.6742 | -0.2    | 3.0839 | 22.1167 | 0.1537 | 1.6744 |
| 4/18/2019 21:20 | 0.7    | 1.1083  | 4.589  | 0       | 3.0518 | 22.2    | 0.1445 | 1.7017 |
| 4/18/2019 21:21 | 0.6833 | -0.375  | 4.519  | -0.3    | 3.0706 | 22.2636 | 0.1595 | 1.7277 |
| 4/18/2019 21:22 | 0.6667 | 0.0583  | 4.758  | -0.6667 | 3.0789 | 22.3818 | 0.1441 | 1.7024 |
| 4/18/2019 21:23 | 0.6    | 0.175   | 4.7143 | 0.3667  | 3.0713 | 22.4364 | 0.1511 | 1.7051 |
| 4/18/2019 21:24 | 0.6    | 0.0833  | 4.569  | -0.4667 | 3.0807 | 22.5    | 0.1474 | 1.6664 |
| 4/18/2019 21:25 | 0.6    | 0.1833  | 4.5978 | -0.0833 | 3.0884 | 22.5    | 0.1539 | 1.6622 |
| 4/18/2019 21:26 | 0.525  | -0.1917 | 4.486  | -0.2    | 3.1054 | 22.4273 | 0.152  | 1.6676 |
| 4/18/2019 21:27 | 0.5417 | 0.2     | 4.7572 | -0.15   | 3.1173 | 22.4818 | 0.1423 | 1.6801 |
| 4/18/2019 21:28 | 0.575  | 0.3417  | 5.0638 | -0.2    | 3.0966 | 22.5667 | 0.1547 | 1.6773 |
| 4/18/2019 21:29 | 0.5    | 0.0667  | 4.6745 | -0.2833 | 3.1207 | 22.6    | 0.1514 | 1.6819 |
| 4/18/2019 21:30 | 0.5    | -0.1417 | 4.4838 | -0.1333 | 3.1094 | 22.63   | 0.1455 | 1.6843 |
| 4/18/2019 21:31 | 0.5    | -0.8083 | 4.6157 | 0.1333  | 3.098  | 22.7    | 0.1594 | 1.6957 |
| 4/18/2019 21:32 | 0.5    | 0.2417  | 4.7127 | -0.3    | 3.1153 | 22.7    | 0.1413 | 1.6703 |
| 4/18/2019 21:33 | 0.5    | -0.0833 | 4.7968 | 0.15    | 3.1294 | 22.625  | 0.1538 | 1.6778 |
| 4/18/2019 21:34 | 0.5    | -0.325  | 4.595  | 0       | 3.1261 | 22.6    | 0.1471 | 1.6763 |
| 4/18/2019 21:35 | 0.475  | -0.1583 | 4.435  | -0.3333 | 3.141  | 22.6636 | 0.1436 | 1.7115 |
| 4/18/2019 21:36 | 0.4    | -0.0667 | 4.6627 | -0.0333 | 3.151  | 22.6556 | 0.155  | 1.7173 |
| 4/18/2019 21:37 | 0.4    | 0.45    | 4.995  | -0.0833 | 3.1514 | 22.6083 | 0.1388 | 1.7399 |
| 4/18/2019 21:38 | 0.4    | -0.3083 | 4.5228 | 0.6     | 3.1244 | 22.7    | 0.1556 | 1.7469 |
| 4/18/2019 21:39 | 0.4    | -0.55   | 4.5023 | 0.0833  | 3.1452 | 22.68   | 0.1456 | 1.7168 |
| 4/18/2019 21:40 | 0.4    | 0.2167  | 4.5598 | 0.4333  | 3.1695 | 22.7    | 0.1533 | 1.706  |
| 4/18/2019 21:41 | 0.3333 | 0.5583  | 4.7572 | 0.1     | 3.1579 | 22.7    | 0.1532 | 1.6851 |
| 4/18/2019 21:42 | 0.4    | -0.1917 | 4.7557 | 0.85    | 3.1655 | 22.7    | 0.1405 | 1.6979 |
| 4/18/2019 21:43 | 0.4    | 0.1833  | 4.7037 | 0       | 3.1569 | 22.72   | 0.1579 | 1.7173 |
| 4/18/2019 21:44 | 0.4    | 0.1583  | 4.4162 | -0.1333 | 3.1816 | 22.8    | 0.1529 | 1.7141 |
| 4/18/2019 21:45 | 0.4    | -0.1167 | 4.7048 | -0.0833 | 3.2039 | 22.8    | 0.1501 | 1.724  |
| 4/18/2019 21:46 | 0.4    | -0.1083 | 4.761  | -0.7667 | 3.2304 | 22.8    | 0.1527 | 1.7318 |
| 4/18/2019 21:47 | 0.4    | -0.0167 | 4.5473 | -0.0833 | 3.2564 | 22.8    | 0.1423 | 1.7258 |
| 4/18/2019 21:48 | 0.4    | 0.3583  | 4.536  | 0.0167  | 3.2441 | 22.8    | 0.1584 | 1.7068 |
| 4/18/2019 21:49 | 0.4    | 0.2     | 4.6757 | -0.15   | 3.2584 | 22.8    | 0.1488 | 1.7126 |
| 4/18/2019 21:50 | 0.4167 | 0.075   | 4.667  | -0.65   | 3.2788 | 22.8    | 0.1535 | 1.7413 |
| 4/18/2019 21:51 | 0.4    | 0.3667  | 4.5813 | -0.4    | 3.3103 | 22.8364 | 0.1466 | 1.7335 |
| 4/18/2019 21:52 | 0.4    | 0.35    | 4.6797 | 0.0667  | 3.3143 | 22.8    | 0.1495 | 1.7388 |
| 4/18/2019 21:53 | 0.4    | -0.025  | 4.4142 | -0.0833 | 3.3246 | 22.85   | 0.1548 | 1.714  |
| 4/18/2019 21:54 | 0.3833 | -0.1083 | 4.6062 | -0.7    | 3.3463 | 22.9    | 0.1389 | 1.7279 |
| 4/18/2019 21:55 | 0.35   | -0.1917 | 4.4157 | -0.2    | 3.3583 | 22.8167 | 0.1561 | 1.7131 |
| 4/18/2019 21:56 | 0.3583 | -0.0417 | 4.3492 | -0.2833 | 3.3788 | 22.8    | 0.153  | 1.6941 |

|                 |        |         |        |         |        |         |        |        |
|-----------------|--------|---------|--------|---------|--------|---------|--------|--------|
| 4/18/2019 21:57 | 0.3    | -0.2667 | 4.5585 | -0.1333 | 3.3942 | 22.8    | 0.1494 | 1.7083 |
| 4/18/2019 21:58 | 0.3    | -0.1167 | 4.3843 | 0.2333  | 3.4186 | 22.8    | 0.1597 | 1.7003 |
| 4/18/2019 21:59 | 0.3    | -0.7917 | 4.4878 | -0.4333 | 3.4341 | 22.8    | 0.142  | 1.7236 |
| 4/18/2019 22:00 | 0.3    | -0.6083 | 4.4848 | -0.3833 | 3.4793 | 22.825  | 0.1609 | 1.7153 |
| 4/18/2019 22:01 | 0.3    | 0.25    | 4.3453 | -0.7667 | 3.4508 | 22.9    | 0.1468 | 1.6968 |
| 4/18/2019 22:02 | 0.3333 | 0.1583  | 4.4481 | -0.35   | 3.4616 | 22.95   | 0.1477 | 1.6833 |
| 4/18/2019 22:03 | 0.4    | 0.1583  | 4.4613 | -0.3    | 3.5088 | 23.0091 | 0.1586 | 1.6889 |
| 4/18/2019 22:04 | 0.4583 | -0.25   | 4.256  | -0.55   | 3.51   | 23.1    | 0.1459 | 1.7212 |
| 4/18/2019 22:05 | 0.4    | 0.1583  | 4.3268 | -0.1    | 3.51   | 23.1636 | 0.1583 | 1.7538 |
| 4/18/2019 22:06 | 0.4    | -0.5583 | 4.2842 | 0.25    | 3.5739 | 23.2    | 0.1503 | 1.7439 |
| 4/18/2019 22:07 | 0.4    | -0.2417 | 4.4493 | -0.3    | 3.5811 | 23.2    | 0.1532 | 1.748  |
| 4/18/2019 22:08 | 0.4    | -0.4667 | 4.4675 | -0.0333 | 3.5682 | 23.2455 | 0.1488 | 1.7243 |
| 4/18/2019 22:09 | 0.4    | -0.325  | 4.7166 | -0.3333 | 3.618  | 23.27   | 0.1465 | 1.6857 |
| 4/18/2019 22:10 | 0.4    | -0.0917 | 4.5206 | -0.2167 | 3.6129 | 23.3583 | 0.1532 | 1.6986 |
| 4/18/2019 22:11 | 0.4    | -0.5083 | 4.4408 | 0.2167  | 3.6293 | 23.47   | 0.1397 | 1.7075 |
| 4/18/2019 22:12 | 0.4917 | -0.3083 | 4.5613 | -0.3333 | 3.6488 | 23.5    | 0.1506 | 1.696  |
| 4/18/2019 22:13 | 0.45   | -0.4    | 4.4884 | -0.8333 | 3.6389 | 23.3909 | 0.1538 | 1.7017 |
| 4/18/2019 22:14 | 0.4    | -0.0417 | 4.599  | -0.2333 | 3.7242 | 23.3    | 0.1534 | 1.7271 |
| 4/18/2019 22:15 | 0.3167 | -0.4417 | 4.3437 | 0.0833  | 3.6602 | 23.3    | 0.1577 | 1.7168 |
| 4/18/2019 22:16 | 0.3    | -0.75   | 4.4133 | -0.1167 | 3.6692 | 23.35   | 0.139  | 1.7338 |
| 4/18/2019 22:17 | 0.3167 | -0.3083 | 4.2844 | 0.0167  | 3.6779 | 23.4    | 0.1527 | 1.7086 |
| 4/18/2019 22:18 | 0.3917 | 0.0833  | 4.2576 | -0.7667 | 3.646  | 23.4    | 0.1429 | 1.7128 |
| 4/18/2019 22:19 | 0.4    | -0.2917 | 4.3222 | -0.1667 | 3.6877 | 23.4455 | 0.152  | 1.7388 |
| 4/18/2019 22:20 | 0.325  | 0.675   | 4.3467 | -0.7    | 3.6858 | 23.5    | 0.154  | 1.7168 |
| 4/18/2019 22:21 | 0.3417 | 0.4583  | 4.6369 | -0.4833 | 3.6802 | 23.5    | 0.1497 | 1.7123 |
| 4/18/2019 22:22 | 0.3    | 0.25    | 4.4593 | -0.2833 | 3.677  | 23.5    | 0.1585 | 1.6936 |
| 4/18/2019 22:23 | 0.3    | -0.0417 | 4.4808 | -0.05   | 3.6743 | 23.45   | 0.1489 | 1.6991 |
| 4/18/2019 22:24 | 0.3    | 0.05    | 4.1605 | -0.3833 | 3.6811 | 23.4    | 0.1518 | 1.6923 |
| 4/18/2019 22:25 | 0.3    | -0.4583 | 4.2551 | -0.45   | 3.6898 | 23.52   | 0.1585 | 1.7298 |
| 4/18/2019 22:26 | 0.325  | 0.575   | 4.4128 | -0.4    | 3.7013 | 23.6    | 0.1508 | 1.6934 |
| 4/18/2019 22:27 | 0.3    | 0.1917  | 4.2246 | -0.3667 | 3.7293 | 23.6    | 0.1593 | 1.717  |
| 4/18/2019 22:28 | 0.3    | -0.8    | 4.3347 | -0.4833 | 3.72   | 23.5833 | 0.1452 | 1.737  |
| 4/18/2019 22:29 | 0.3    | -0.3667 | 4.3959 | -0.4167 | 3.7744 | 23.53   | 0.1563 | 1.6998 |
| 4/18/2019 22:30 | 0.3083 | -0.8583 | 4.2956 | -0.4833 | 3.7706 | 23.6    | 0.1454 | 1.6877 |
| 4/18/2019 22:31 | 0.4    | -0.025  | 4.5439 | 0.0167  | 3.7857 | 23.6    | 0.1541 | 1.6927 |
| 4/18/2019 22:32 | 0.4    | 0.2583  | 4.1266 | -0.1333 | 3.786  | 23.5091 | 0.1563 | 1.7128 |
| 4/18/2019 22:33 | 0.4    | -0.35   | 4.2702 | -0.4    | 3.8377 | 23.5167 | 0.1419 | 1.7354 |
| 4/18/2019 22:34 | 0.4    | -0.75   | 4.0333 | -0.3    | 3.7947 | 23.53   | 0.1577 | 1.7088 |
| 4/18/2019 22:35 | 0.4083 | -0.3083 | 4.1642 | -0.6    | 3.828  | 23.6    | 0.1438 | 1.7158 |
| 4/18/2019 22:36 | 0.4333 | -1.0917 | 4.4271 | -0.2333 | 3.7902 | 23.6364 | 0.1527 | 1.7113 |
| 4/18/2019 22:37 | 0.425  | -0.6    | 4.288  | -0.7167 | 3.7986 | 23.7    | 0.1557 | 1.7216 |
| 4/18/2019 22:38 | 0.45   | -0.55   | 4.2003 | -0.4    | 3.8009 | 23.7    | 0.152  | 1.73   |
| 4/18/2019 22:39 | 0.4    | -0.075  | 4.2319 | -0.6167 | 3.7778 | 23.7    | 0.1579 | 1.7121 |
| 4/18/2019 22:40 | 0.375  | -0.2167 | 4.3923 | -0.6667 | 3.8062 | 23.8    | 0.1419 | 1.705  |
| 4/18/2019 22:41 | 0.3    | -0.2    | 4.3026 | -0.0333 | 3.8161 | 23.8    | 0.1587 | 1.6919 |
| 4/18/2019 22:42 | 0.3    | 0.35    | 4.5674 | -0.45   | 3.8027 | 23.9    | 0.1506 | 1.7055 |
| 4/18/2019 22:43 | 0.3    | -0.3083 | 4.6876 | 0.45    | 3.7949 | 23.9    | 0.1512 | 1.7223 |

|                 |        |         |        |         |        |         |        |        |
|-----------------|--------|---------|--------|---------|--------|---------|--------|--------|
| 4/18/2019 22:44 | 0.3    | -0.6333 | 4.5653 | 0.05    | 3.8148 | 23.9    | 0.1549 | 1.6927 |
| 4/18/2019 22:45 | 0.275  | 0.1833  | 4.3229 | -0.0833 | 3.8226 | 23.9    | 0.1475 | 1.7098 |
| 4/18/2019 22:46 | 0.225  | 0.1833  | 4.2685 | -0.15   | 3.8352 | 23.97   | 0.1623 | 1.7012 |
| 4/18/2019 22:47 | 0.2    | 0.0333  | 4.5083 | -0.2333 | 3.8081 | 23.82   | 0.1463 | 1.7208 |
| 4/18/2019 22:48 | 0.2    | -0.35   | 4.2374 | -0.6833 | 3.796  | 23.8    | 0.1547 | 1.719  |
| 4/18/2019 22:49 | 0.2    | -0.0917 | 4.4613 | 0.1167  | 3.7999 | 23.73   | 0.155  | 1.7386 |
| 4/18/2019 22:50 | 0.2    | -0.75   | 4.3901 | 0.05    | 3.8105 | 23.5909 | 0.1498 | 1.7097 |
| 4/18/2019 22:51 | 0.2    | -0.4417 | 4.3286 | -0.5333 | 3.7957 | 23.4167 | 0.1606 | 1.7103 |
| 4/18/2019 22:52 | 0.2    | 0.75    | 4.0355 | -0.2    | 3.7963 | 23.3    | 0.1448 | 1.6953 |
| 4/18/2019 22:53 | 0.3    | 0.4583  | 4.2132 | -0.25   | 3.8198 | 23.3    | 0.1535 | 1.7139 |
| 4/18/2019 22:54 | 0.2167 | -0.175  | 4.324  | 0.15    | 3.8323 | 23.3    | 0.15   | 1.7396 |
| 4/18/2019 22:55 | 0.2    | -0.2083 | 4.2898 | -0.2667 | 3.8067 | 23.3    | 0.1513 | 1.7411 |
| 4/18/2019 22:56 | 0.125  | -0.1917 | 4.3288 | -0.3167 | 3.8115 | 23.3364 | 0.1598 | 1.7244 |
| 4/18/2019 22:57 | 0.1    | -0.25   | 4.436  | 0.2     | 3.7978 | 23.4    | 0.1434 | 1.7202 |
| 4/18/2019 22:58 | 0.1083 | -0.1833 | 4.6008 | -0.2    | 3.7823 | 23.36   | 0.1581 | 1.7153 |
| 4/18/2019 22:59 | 0.1833 | -0.125  | 4.4063 | 0.3333  | 3.798  | 23.3273 | 0.1395 | 1.6947 |
| 4/18/2019 23:00 | 0.2    | -0.7    | 4.1928 | -0.25   | 3.809  | 23.4    | 0.1592 | 1.6937 |
| 4/18/2019 23:01 | 0.2167 | 0.05    | 4.1408 | -0.1    | 3.8189 | 23.4    | 0.1496 | 1.6988 |
| 4/18/2019 23:02 | 0.2917 | -0.15   | 4.4018 | 0.0667  | 3.8108 | 23.5    | 0.1493 | 1.6881 |
| 4/18/2019 23:03 | 0.3    | 0.0917  | 4.4304 | -0.35   | 3.8099 | 23.6667 | 0.1622 | 1.7113 |
| 4/18/2019 23:04 | 0.3    | -0.1833 | 4.1955 | -0.3333 | 3.8093 | 23.7818 | 0.1387 | 1.7043 |
| 4/18/2019 23:05 | 0.3083 | -0.2667 | 4.4083 | -0.4    | 3.804  | 23.8273 | 0.1544 | 1.7344 |
| 4/18/2019 23:06 | 0.4    | 0.25    | 4.3663 | -0.4    | 3.804  | 23.9    | 0.1488 | 1.7641 |
| 4/18/2019 23:07 | 0.4    | 0.225   | 3.9547 | -0.1833 | 3.8108 | 23.9    | 0.1566 | 1.7388 |
| 4/18/2019 23:08 | 0.4    | -0.35   | 4.2163 | -0.4167 | 3.7878 | 23.9    | 0.1599 | 1.7093 |
| 4/18/2019 23:09 | 0.4    | -0.7583 | 4.1273 | -0.5    | 3.7888 | 23.9    | 0.1512 | 1.6929 |
| 4/18/2019 23:10 | 0.4    | -0.1417 | 4.2361 | -0.25   | 3.8    | 23.9091 | 0.1544 | 1.7077 |
| 4/18/2019 23:11 | 0.3667 | -0.1667 | 3.9808 | -0.2167 | 3.8061 | 24      | 0.14   | 1.7123 |
| 4/18/2019 23:12 | 0.3182 | -0.0083 | 4.2958 | -0.6167 | 3.7832 | 24.01   | 0.1576 | 1.7058 |
| 4/18/2019 23:13 | 0.3    | -0.7167 | 4.3185 | -0.0333 | 3.7894 | 24.1    | 0.1564 | 1.733  |
| 4/18/2019 23:14 | 0.3667 | -0.725  | 4.2643 | -0.3667 | 3.7826 | 24.1    | 0.1492 | 1.7503 |
| 4/18/2019 23:15 | 0.4    | -0.3917 | 4.3093 | -0.4    | 3.7897 | 24.1273 | 0.1568 | 1.7266 |
| 4/18/2019 23:16 | 0.375  | -0.9417 | 4.3627 | 0.0167  | 3.778  | 24.2    | 0.1403 | 1.7279 |
| 4/18/2019 23:17 | 0.3    | -1.0667 | 4.0273 | -0.5167 | 3.7693 | 24.2    | 0.1584 | 1.6826 |
| 4/18/2019 23:18 | 0.3    | -0.075  | 4.3564 | -0.05   | 3.7733 | 24.1273 | 0.1504 | 1.6898 |
| 4/18/2019 23:19 | 0.3    | -0.3    | 4.0257 | 0.1     | 3.7776 | 24.0546 | 0.1479 | 1.7208 |
| 4/18/2019 23:20 | 0.3    | -0.5583 | 4.1798 | -0.4667 | 3.7714 | 24.05   | 0.1552 | 1.7307 |
| 4/18/2019 23:21 | 0.3    | -0.2167 | 4.0675 | -0.0167 | 3.7492 | 24.1    | 0.1376 | 1.7378 |
| 4/18/2019 23:22 | 0.275  | -0.0083 | 4.7977 | -0.3333 | 3.7487 | 24.0727 | 0.1593 | 1.7135 |
| 4/18/2019 23:23 | 0.2    | 0.1     | 4.3538 | -0.1333 | 3.7516 | 24.1    | 0.1428 | 1.6912 |
| 4/18/2019 23:24 | 0.2833 | -0.325  | 4.4539 | 0.05    | 3.7454 | 24.1    | 0.1526 | 1.6968 |
| 4/18/2019 23:25 | 0.3    | -0.1083 | 4.4124 | -0.0333 | 3.736  | 24.1    | 0.1505 | 1.7326 |
| 4/18/2019 23:26 | 0.3    | -0.5083 | 4.5058 | -0.65   | 3.7278 | 24.1    | 0.1399 | 1.717  |
| 4/18/2019 23:27 | 0.3    | 0.15    | 4.0522 | -0.35   | 3.7198 | 24.03   | 0.1525 | 1.693  |
| 4/18/2019 23:28 | 0.3    | -0.9    | 3.8482 | -0.4    | 3.7134 | 24      | 0.1414 | 1.6795 |
| 4/18/2019 23:29 | 0.3    | -0.3917 | 4.1044 | -0.4667 | 3.7173 | 23.9909 | 0.1554 | 1.6768 |
| 4/18/2019 23:30 | 0.35   | -0.5667 | 4.1027 | -0.6167 | 3.6996 | 23.9182 | 0.1509 | 1.7278 |

|                 |        |         |        |         |        |         |        |        |
|-----------------|--------|---------|--------|---------|--------|---------|--------|--------|
| 4/18/2019 23:31 | 0.3    | -0.375  | 4.2068 | 0.05    | 3.7098 | 23.9111 | 0.1516 | 1.7577 |
| 4/18/2019 23:32 | 0.3833 | -0.5167 | 4.1418 | 0.1667  | 3.7203 | 23.9    | 0.1571 | 1.7556 |
| 4/18/2019 23:33 | 0.3083 | 0.0583  | 3.7422 | -0.5    | 3.6992 | 23.9    | 0.1389 | 1.7391 |
| 4/18/2019 23:34 | 0.4    | -0.2583 | 4.1443 | -0.2833 | 3.6784 | 23.9    | 0.1578 | 1.6926 |
| 4/18/2019 23:35 | 0.4    | 0.1417  | 4.135  | -0.3833 | 3.6694 | 23.9    | 0.1458 | 1.6826 |
| 4/18/2019 23:36 | 0.45   | -0.4417 | 4.5423 | -0.25   | 3.6826 | 23.9    | 0.149  | 1.7171 |
| 4/18/2019 23:37 | 0.4917 | -0.1167 | 4.1568 | -0.7667 | 3.6734 | 23.9    | 0.1574 | 1.7242 |
| 4/18/2019 23:38 | 0.5    | -0.4833 | 4.1513 | -0.6167 | 3.6783 | 23.8091 | 0.1398 | 1.7126 |
| 4/18/2019 23:39 | 0.5    | -0.45   | 4.1557 | -0.3333 | 3.6409 | 23.625  | 0.1525 | 1.7283 |
| 4/18/2019 23:40 | 0.4917 | -0.775  | 4.1477 | 0.0667  | 3.6325 | 23.6    | 0.1459 | 1.6792 |
| 4/18/2019 23:41 | 0.4083 | -0.1917 | 3.9442 | -0.2333 | 3.649  | 23.5636 | 0.1516 | 1.6723 |
| 4/18/2019 23:42 | 0.4    | -0.0417 | 4.2155 | -0.35   | 3.647  | 23.5    | 0.1512 | 1.6628 |
| 4/18/2019 23:43 | 0.3    | -0.8083 | 4.1825 | -0.0333 | 3.6554 | 23.4333 | 0.1501 | 1.6874 |
| 4/18/2019 23:44 | 0.3    | 0.0833  | 4.3568 | -0.7333 | 3.639  | 23.2091 | 0.1598 | 1.6996 |
| 4/18/2019 23:45 | 0.3417 | -0.6    | 4.5113 | -0.0333 | 3.6254 | 23.07   | 0.1441 | 1.6903 |
| 4/18/2019 23:46 | 0.4    | 0.1083  | 4.2768 | -0.0833 | 3.5888 | 22.8182 | 0.1522 | 1.7015 |
| 4/18/2019 23:47 | 0.4    | 0.2833  | 4.414  | 0.4833  | 3.599  | 22.5917 | 0.152  | 1.7056 |
| 4/18/2019 23:48 | 0.3417 | -0.7167 | 4.2432 | -0.25   | 3.6163 | 22.45   | 0.1421 | 1.7177 |
| 4/18/2019 23:49 | 0.3    | -0.3    | 4.1398 | -0.5833 | 3.5967 | 22.2    | 0.1575 | 1.7329 |
| 4/18/2019 23:50 | 0.3    | 0       | 4.2517 | -0.4667 | 3.6161 | 21.9778 | 0.1444 | 1.744  |
| 4/18/2019 23:51 | 0.3667 | -0.1667 | 4.184  | 0.3833  | 3.5961 | 21.8833 | 0.1525 | 1.7151 |
| 4/18/2019 23:52 | 0.3833 | -0.5083 | 4.3183 | -0.2833 | 3.5649 | 22      | 0.1453 | 1.7187 |
| 4/18/2019 23:53 | 0.35   | -0.15   | 4.2925 | -0.1667 | 3.5931 | 22      | 0.1458 | 1.6963 |
| 4/18/2019 23:54 | 0.3    | -0.6    | 4.5662 | -0.5167 | 3.5877 | 21.6889 | 0.1583 | 1.6582 |
| 4/18/2019 23:55 | 0.3083 | 0.1833  | 4.1932 | -0.25   | 3.5493 | 21.2727 | 0.1377 | 1.6837 |
| 4/18/2019 23:56 | 0.325  | -0.3833 | 4.0758 | -0.3    | 3.559  | 21.18   | 0.1509 | 1.712  |
| 4/18/2019 23:57 | 0.3917 | -0.2167 | 3.9517 | -0.1333 | 3.5639 | 21.2    | 0.1493 | 1.7195 |
| 4/18/2019 23:58 | 0.4    | 0.05    | 4.2233 | 0.1     | 3.5591 | 21.14   | 0.1491 | 1.7129 |
| 4/18/2019 23:59 | 0.4    | -0.175  | 4.0967 | -0.4167 | 3.5427 | 21.0583 | 0.1541 | 1.752  |
| 4/19/2019 0:00  | 0.4    | 0.0917  | 4.082  | -0.0167 | 3.5323 | 21.01   | 0.1397 | 1.7408 |
| 4/19/2019 0:01  | 0.5    | -0.25   | 4.3808 | 0.15    | 3.5744 | 20.9    | 0.1535 | 1.7104 |
| 4/19/2019 0:02  | 0.5    | -0.5583 | 4.4002 | 0.0333  | 3.5619 | 21      | 0.1475 | 1.7212 |
| 4/19/2019 0:03  | 0.5    | -0.1667 | 4.2247 | -0.1    | 3.53   | 21      | 0.1502 | 1.7388 |
| 4/19/2019 0:04  | 0.4417 | -0.8083 | 4.1333 | 0.05    | 3.5443 | 21      | 0.1478 | 1.7278 |
| 4/19/2019 0:05  | 0.4    | 0       | 4.1297 | -0.1833 | 3.5313 | 20.91   | 0.1383 | 1.718  |
| 4/19/2019 0:06  | 0.4    | 0.1333  | 4.2298 | -0.7667 | 3.523  | 20.65   | 0.152  | 1.7041 |
| 4/19/2019 0:07  | 0.4    | 0.1583  | 4.4198 | 0.0333  | 3.523  | 20.8182 | 0.1409 | 1.6947 |
| 4/19/2019 0:08  | 0.4    | -0.3    | 3.7985 | 0.45    | 3.5095 | 20.9546 | 0.1535 | 1.6882 |
| 4/19/2019 0:09  | 0.4    | -0.025  | 4.0183 | -0.05   | 3.5019 | 21.09   | 0.1441 | 1.7105 |
| 4/19/2019 0:10  | 0.4    | -0.1333 | 4.393  | -0.4333 | 3.4687 | 21.1167 | 0.1419 | 1.7243 |
| 4/19/2019 0:11  | 0.4    | -0.125  | 4.3255 | 0.0667  | 3.4593 | 21      | 0.151  | 1.7218 |
| 4/19/2019 0:12  | 0.4    | -0.5833 | 4.0763 | 0.1333  | 3.4963 | 20.9909 | 0.1338 | 1.7368 |
| 4/19/2019 0:13  | 0.375  | -0.0417 | 4.2715 | -0.3167 | 3.5078 | 21.0273 | 0.1507 | 1.715  |
| 4/19/2019 0:14  | 0.3    | -0.4917 | 3.9788 | 0       | 3.4998 | 21.0636 | 0.1368 | 1.7203 |
| 4/19/2019 0:15  | 0.3    | 0.175   | 4.0943 | -0.6667 | 3.5088 | 21.0333 | 0.152  | 1.7063 |
| 4/19/2019 0:16  | 0.3    | 0.4417  | 4.0053 | -0.4    | 3.5107 | 20.8546 | 0.1511 | 1.692  |
| 4/19/2019 0:17  | 0.3    | -0.1333 | 3.8187 | -0.4833 | 3.5288 | 20.9    | 0.1434 | 1.7019 |

|                |        |         |        |         |        |         |        |        |
|----------------|--------|---------|--------|---------|--------|---------|--------|--------|
| 4/19/2019 0:18 | 0.3    | -0.025  | 3.9403 | -0.5    | 3.5089 | 21.0546 | 0.1513 | 1.7044 |
| 4/19/2019 0:19 | 0.3    | -0.4083 | 4.3148 | -0.1    | 3.4943 | 21.3556 | 0.1372 | 1.6927 |
| 4/19/2019 0:20 | 0.3    | 0.4167  | 4.1142 | 0.2833  | 3.5392 | 21.39   | 0.1527 | 1.6928 |
| 4/19/2019 0:21 | 0.3    | 0.0917  | 4.1862 | -0.5167 | 3.5556 | 21.38   | 0.1396 | 1.7063 |
| 4/19/2019 0:22 | 0.3    | 0.1     | 3.9258 | -0.1833 | 3.5181 | 21.0778 | 0.1376 | 1.7226 |
| 4/19/2019 0:23 | 0.3    | 0.025   | 4.186  | 0.1     | 3.4921 | 21.0636 | 0.151  | 1.7201 |
| 4/19/2019 0:24 | 0.3    | -0.125  | 4.6157 | -0.4167 | 3.5664 | 21.2909 | 0.1336 | 1.7052 |
| 4/19/2019 0:25 | 0.3083 | 0.4917  | 4.175  | 0.5333  | 3.755  | 21.4182 | 0.1501 | 1.6927 |
| 4/19/2019 0:26 | 0.4    | -0.2083 | 4.0655 | -0.95   | 3.5908 | 21.5    | 0.1314 | 1.699  |
| 4/19/2019 0:27 | 0.4333 | -0.6667 | 4.131  | 0.15    | 3.7068 | 21.6455 | 0.1394 | 1.7259 |
| 4/19/2019 0:28 | 0.4417 | -0.3333 | 4.058  | -0.3333 | 3.6124 | 22      | 0.1454 | 1.73   |
| 4/19/2019 0:29 | 0.4    | 0.0083  | 4.1753 | -0.3167 | 3.5827 | 21.7182 | 0.1425 | 1.7255 |
| 4/19/2019 0:30 | 0.375  | -0.8167 | 4.2602 | 0.2833  | 3.5763 | 21.4    | 0.1611 | 1.7141 |
| 4/19/2019 0:31 | 0.375  | -0.8083 | 4.2    | 0.1167  | 3.6734 | 21.43   | 0.1417 | 1.6998 |
| 4/19/2019 0:32 | 0.3083 | -0.275  | 4.1783 | -0.3333 | 3.668  | 21.2167 | 0.1442 | 1.689  |
| 4/19/2019 0:33 | 0.3667 | -1.1917 | 4.0065 | -0.15   | 3.7093 | 21.3    | 0.1428 | 1.6818 |
| 4/19/2019 0:34 | 0.325  | -0.6333 | 4.1162 | 0.1167  | 3.661  | 21.5364 | 0.145  | 1.706  |
| 4/19/2019 0:35 | 0.35   | -0.35   | 3.9813 | -0.2    | 3.6156 | 22.0182 | 0.1558 | 1.7003 |
| 4/19/2019 0:36 | 0.3    | -0.525  | 4.257  | -0.6    | 3.6813 | 22      | 0.1291 | 1.6948 |
| 4/19/2019 0:37 | 0.3083 | -0.3833 | 4.2435 | -0.2167 | 3.6491 | 21.76   | 0.1502 | 1.6884 |
| 4/19/2019 0:38 | 0.3    | -0.3    | 4.141  | -0.1667 | 3.6325 | 21.49   | 0.1466 | 1.6851 |
| 4/19/2019 0:39 | 0.35   | -0.6    | 3.9895 | -0.9    | 3.7047 | 21.3273 | 0.1427 | 1.6802 |
| 4/19/2019 0:40 | 0.3167 | -0.1167 | 4.3487 | -0.8    | 3.7189 | 21.2    | 0.1573 | 1.6697 |
| 4/19/2019 0:41 | 0.4    | -0.9333 | 4.1558 | 0.0167  | 3.7641 | 21.2546 | 0.1392 | 1.6851 |
| 4/19/2019 0:42 | 0.4    | -0.05   | 4.115  | -0.9667 | 3.7267 | 21.55   | 0.1478 | 1.7028 |
| 4/19/2019 0:43 | 0.3917 | -0.0417 | 3.8367 | -0.8333 | 3.7058 | 21.3    | 0.1367 | 1.7007 |
| 4/19/2019 0:44 | 0.3083 | -0.2    | 3.9025 | -0.1    | 3.6851 | 21.4182 | 0.1503 | 1.7179 |
| 4/19/2019 0:45 | 0.3    | -0.4083 | 4.0202 | -0.6167 | 3.7196 | 21.08   | 0.1471 | 1.7226 |
| 4/19/2019 0:46 | 0.35   | -0.0667 | 3.8765 | -1.0167 | 3.6976 | 20.9    | 0.1317 | 1.698  |
| 4/19/2019 0:47 | 0.4    | -0.5083 | 3.8835 | -0.95   | 3.7213 | 20.7546 | 0.1501 | 1.6981 |
| 4/19/2019 0:48 | 0.4    | -0.25   | 3.8088 | -0.1833 | 3.7472 | 20.8    | 0.1439 | 1.7144 |
| 4/19/2019 0:49 | 0.3917 | -0.5    | 3.9782 | -0.3667 | 3.7393 | 20.84   | 0.1574 | 1.7165 |
| 4/19/2019 0:50 | 0.4    | 0.3167  | 3.9205 | -0.5    | 3.7983 | 21.1    | 0.1391 | 1.7218 |
| 4/19/2019 0:51 | 0.4    | -0.575  | 3.707  | -0.8    | 3.7991 | 21.1    | 0.1448 | 1.7053 |
| 4/19/2019 0:52 | 0.4    | -0.125  | 3.9265 | -0.9    | 3.7825 | 21.2818 | 0.1528 | 1.7256 |
| 4/19/2019 0:53 | 0.4    | -0.35   | 3.7473 | -0.4667 | 3.8922 | 20.96   | 0.1339 | 1.7246 |
| 4/19/2019 0:54 | 0.4    | 0.05    | 3.951  | 0.2     | 3.7668 | 20.6182 | 0.1442 | 1.7025 |
| 4/19/2019 0:55 | 0.3667 | -0.3083 | 4.0525 | -0.0833 | 3.8358 | 20.58   | 0.1397 | 1.7216 |
| 4/19/2019 0:56 | 0.4    | -0.5417 | 3.7537 | -0.3167 | 3.9193 | 20.37   | 0.1421 | 1.7163 |
| 4/19/2019 0:57 | 0.4    | 0.1     | 3.8673 | -0.15   | 3.8583 | 20.07   | 0.1486 | 1.701  |
| 4/19/2019 0:58 | 0.4    | -0.0667 | 3.7917 | 0.2833  | 3.9675 | 19.6833 | 0.1367 | 1.7271 |
| 4/19/2019 0:59 | 0.4    | -0.175  | 3.6787 | -0.1833 | 3.9011 | 19.4182 | 0.1477 | 1.7191 |
| 4/19/2019 1:00 | 0.4    | -0.1833 | 3.9912 | 0.0833  | 3.8708 | 19.15   | 0.1358 | 1.7224 |
| 4/19/2019 1:01 | 0.4    | -0.3667 | 3.9125 | -0.45   | 3.8473 | 19.08   | 0.1515 | 1.7087 |
| 4/19/2019 1:02 | 0.4    | 0.5167  | 4.1514 | -0.5833 | 3.9997 | 18.8818 | 0.1417 | 1.6883 |
| 4/19/2019 1:03 | 0.4    | 0.125   | 3.7018 | -0.7333 | 4.1118 | 18.1636 | 0.1404 | 1.7148 |
| 4/19/2019 1:04 | 0.4    | -0.6083 | 3.8476 | -0.6833 | 4.0423 | 17.7444 | 0.1518 | 1.7078 |

|                |        |         |        |         |        |         |        |        |
|----------------|--------|---------|--------|---------|--------|---------|--------|--------|
| 4/19/2019 1:05 | 0.4    | -0.5333 | 3.6743 | -0.6    | 4.0734 | 17.3364 | 0.1375 | 1.7068 |
| 4/19/2019 1:06 | 0.4    | -0.225  | 3.8276 | -0.3167 | 3.9512 | 17.5091 | 0.145  | 1.7142 |
| 4/19/2019 1:07 | 0.4833 | 0.1167  | 3.9151 | -0.3    | 4.078  | 17.72   | 0.132  | 1.6968 |
| 4/19/2019 1:08 | 0.4167 | -0.1333 | 3.6863 | 0.25    | 4.086  | 17.7636 | 0.1444 | 1.7135 |
| 4/19/2019 1:09 | 0.4    | -0.0167 | 3.7848 | -0.1    | 4.0795 | 17.9909 | 0.1474 | 1.743  |
| 4/19/2019 1:10 | 0.35   | -0.0917 | 3.8197 | -0.2    | 4.0962 | 18.0909 | 0.1429 | 1.7581 |
| 4/19/2019 1:11 | 0.3    | -0.9583 | 3.6991 | -0.5333 | 4.1738 | 17.8273 | 0.1512 | 1.7346 |
| 4/19/2019 1:12 | 0.3    | -0.1417 | 3.8234 | -0.3333 | 4.1728 | 17.4818 | 0.1349 | 1.7216 |
| 4/19/2019 1:13 | 0.3    | -0.3917 | 3.7    | -0.4167 | 4.1433 | 16.8818 | 0.1403 | 1.7475 |
| 4/19/2019 1:14 | 0.2917 | -0.375  | 3.5913 | -0.5167 | 4.2569 | 16.72   | 0.1455 | 1.7432 |
| 4/19/2019 1:15 | 0.2333 | 0.475   | 3.8793 | 0       | 4.2243 | 17.5    | 0.1373 | 1.7257 |
| 4/19/2019 1:16 | 0.2    | -0.275  | 3.6003 | -0.0167 | 4.3008 | 17.9417 | 0.1539 | 1.7234 |
| 4/19/2019 1:17 | 0.1667 | -0.6583 | 3.7629 | -0.4667 | 4.2446 | 18.06   | 0.1374 | 1.7089 |
| 4/19/2019 1:18 | 0.175  | 0.4167  | 4.0053 | -0.5167 | 4.2424 | 18.31   | 0.14   | 1.7203 |
| 4/19/2019 1:19 | 0.2167 | -0.3167 | 3.9863 | -0.3333 | 4.3557 | 18.39   | 0.1495 | 1.7302 |
| 4/19/2019 1:20 | 0.3    | -0.075  | 4.0873 | -0.4667 | 4.1959 | 18.1583 | 0.1437 | 1.72   |
| 4/19/2019 1:21 | 0.2167 | 0.0083  | 3.4196 | -0.4167 | 4.1272 | 17.66   | 0.1553 | 1.7114 |
| 4/19/2019 1:22 | 0.1333 | -0.3167 | 3.9851 | -0.0167 | 4.1458 | 17.9111 | 0.1376 | 1.7066 |
| 4/19/2019 1:23 | 0.1    | 0.225   | 3.9217 | -0.3167 | 4.1429 | 18.43   | 0.1456 | 1.7249 |
| 4/19/2019 1:24 | 0.1    | -0.3833 | 3.8516 | -0.1    | 4.2529 | 19.0111 | 0.143  | 1.7148 |
| 4/19/2019 1:25 | 0.1667 | 0.0667  | 3.8384 | -0.4833 | 4.2866 | 19.68   | 0.1371 | 1.6965 |
| 4/19/2019 1:26 | 0.2    | -0.1917 | 3.9918 | 0.25    | 4.2755 | 19.7182 | 0.1518 | 1.7285 |
| 4/19/2019 1:27 | 0.2    | -0.65   | 3.8529 | -0.3667 | 4.3233 | 19.3909 | 0.1353 | 1.7327 |
| 4/19/2019 1:28 | 0.1917 | 0.15    | 3.7494 | -0.1    | 4.4049 | 19.08   | 0.1505 | 1.6911 |
| 4/19/2019 1:29 | 0.1917 | -0.475  | 3.8148 | -0.2667 | 4.3739 | 19.2273 | 0.1441 | 1.7293 |
| 4/19/2019 1:30 | 0.2083 | -0.4917 | 3.9491 | -0.8    | 4.3394 | 19.2889 | 0.1419 | 1.7243 |
| 4/19/2019 1:31 | 0.225  | 0.2083  | 3.8208 | -0.5    | 4.3709 | 19.4546 | 0.1531 | 1.7125 |
| 4/19/2019 1:32 | 0.2    | -0.425  | 3.5498 | -0.2167 | 4.3601 | 19.56   | 0.1393 | 1.6928 |
| 4/19/2019 1:33 | 0.2083 | -0.6    | 3.6628 | -0.2833 | 4.4054 | 20.55   | 0.1513 | 1.7248 |
| 4/19/2019 1:34 | 0.2    | 0.25    | 3.7563 | -0.6    | 4.3337 | 20.9444 | 0.1399 | 1.6912 |
| 4/19/2019 1:35 | 0.2083 | 0.1083  | 3.8088 | -0.7167 | 4.2973 | 20.8546 | 0.1478 | 1.6811 |
| 4/19/2019 1:36 | 0.2    | -0.3667 | 3.9825 | -0.5    | 4.422  | 20.9    | 0.15   | 1.7039 |
| 4/19/2019 1:37 | 0.2    | -0.3333 | 3.3513 | -0.2167 | 4.3666 | 21.0091 | 0.1354 | 1.7035 |
| 4/19/2019 1:38 | 0.2333 | -0.3417 | 3.8158 | -0.0167 | 4.3348 | 21.1091 | 0.1468 | 1.7023 |
| 4/19/2019 1:39 | 0.3    | -0.4583 | 3.8293 | -0.1667 | 4.3368 | 21.0727 | 0.1383 | 1.6928 |
| 4/19/2019 1:40 | 0.3    | -0.825  | 3.6069 | -0.6167 | 4.2768 | 21.4    | 0.1479 | 1.6638 |
| 4/19/2019 1:41 | 0.3    | 0.65    | 3.7967 | -0.55   | 4.3463 | 21.2417 | 0.1452 | 1.712  |
| 4/19/2019 1:42 | 0.3    | 0.15    | 3.9349 | -1.0167 | 4.3396 | 21.3364 | 0.1453 | 1.7117 |
| 4/19/2019 1:43 | 0.3    | 0.4917  | 3.8182 | -0.0667 | 4.2683 | 21.06   | 0.1527 | 1.6993 |
| 4/19/2019 1:44 | 0.3    | -0.025  | 3.856  | -0.4167 | 4.3111 | 20.8636 | 0.134  | 1.6998 |
| 4/19/2019 1:45 | 0.3    | -0.4833 | 3.6735 | -0.4333 | 4.2835 | 20.06   | 0.1532 | 1.7068 |
| 4/19/2019 1:46 | 0.3    | -0.1083 | 3.5498 | -0.45   | 4.3213 | 19.1667 | 0.1402 | 1.6964 |
| 4/19/2019 1:47 | 0.3    | -0.5833 | 3.7946 | -0.6333 | 4.2818 | 18.9818 | 0.1436 | 1.702  |
| 4/19/2019 1:48 | 0.3    | -0.1667 | 3.6963 | -0.2167 | 4.2659 | 18.7909 | 0.1478 | 1.6984 |
| 4/19/2019 1:49 | 0.2833 | 0.35    | 3.6885 | -0.4167 | 4.27   | 18.79   | 0.132  | 1.6958 |
| 4/19/2019 1:50 | 0.2    | -0.1833 | 3.8496 | -0.5    | 4.26   | 18.65   | 0.1519 | 1.709  |
| 4/19/2019 1:51 | 0.175  | -0.3    | 3.5491 | -0.8833 | 4.2343 | 18.8    | 0.13   | 1.7287 |

|                |        |         |        |         |        |         |        |        |
|----------------|--------|---------|--------|---------|--------|---------|--------|--------|
| 4/19/2019 1:52 | 0.1917 | -0.575  | 3.8364 | -0.25   | 4.2514 | 18.7556 | 0.1444 | 1.725  |
| 4/19/2019 1:53 | 0.2    | -0.7167 | 3.9153 | -0.5    | 4.2628 | 18.8636 | 0.1416 | 1.7222 |
| 4/19/2019 1:54 | 0.2    | -0.65   | 4.0102 | -0.2667 | 4.2407 | 18.7364 | 0.1401 | 1.7105 |
| 4/19/2019 1:55 | 0.2083 | 0.25    | 4.0463 | 0.05    | 4.2356 | 18.5455 | 0.1499 | 1.7121 |
| 4/19/2019 1:56 | 0.2917 | -0.4    | 3.4667 | -0.1667 | 4.2496 | 18.57   | 0.1333 | 1.6848 |
| 4/19/2019 1:57 | 0.3    | -0.1583 | 3.9313 | -0.35   | 4.247  | 19.2    | 0.1507 | 1.6968 |
| 4/19/2019 1:58 | 0.2083 | -0.1667 | 3.9288 | -0.2    | 4.2291 | 20.0778 | 0.1384 | 1.7068 |
| 4/19/2019 1:59 | 0.2    | -0.125  | 3.8783 | -0.0667 | 4.2203 | 20.14   | 0.1415 | 1.683  |
| 4/19/2019 2:00 | 0.2    | -0.125  | 3.7233 | -0.4167 | 4.2133 | 20.3    | 0.1406 | 1.7071 |
| 4/19/2019 2:01 | 0.1083 | -0.0417 | 3.7025 | -0.6333 | 4.1998 | 20.4364 | 0.1354 | 1.7248 |
| 4/19/2019 2:02 | 0.1667 | -0.8667 | 3.856  | -0.4167 | 4.2073 | 20.4546 | 0.1505 | 1.7245 |
| 4/19/2019 2:03 | 0.2    | -0.0083 | 4.1934 | -1.5    | 4.2686 | 20.55   | 0.1334 | 1.7206 |
| 4/19/2019 2:04 | 0.225  | -0.4417 | 3.6979 | -0.5667 | 4.2648 | 20.7727 | 0.15   | 1.7159 |
| 4/19/2019 2:05 | 0.2    | -0.5583 | 3.8068 | -0.4667 | 4.2502 | 21      | 0.1413 | 1.7163 |
| 4/19/2019 2:06 | 0.2    | -0.6917 | 3.4636 | -0.3    | 4.2334 | 21.13   | 0.1438 | 1.7383 |
| 4/19/2019 2:07 | 0.275  | -0.425  | 3.5872 | -0.7667 | 4.2848 | 21.49   | 0.1485 | 1.7593 |
| 4/19/2019 2:08 | 0.3    | -0.4833 | 3.8137 | 0.1833  | 4.2365 | 21.76   | 0.1342 | 1.761  |
| 4/19/2019 2:09 | 0.25   | -0.3167 | 3.6804 | -0.3667 | 4.234  | 21.4    | 0.1548 | 1.7611 |
| 4/19/2019 2:10 | 0.2083 | -0.4417 | 4.0133 | -0.15   | 4.245  | 21.5364 | 0.1449 | 1.7587 |
| 4/19/2019 2:11 | 0.2167 | -0.1333 | 3.5729 | -0.2    | 4.3093 | 21.8111 | 0.1444 | 1.7361 |
| 4/19/2019 2:12 | 0.3    | -0.2    | 3.6707 | -0.7333 | 4.264  | 21.74   | 0.1467 | 1.7203 |
| 4/19/2019 2:13 | 0.3    | -0.3083 | 3.4873 | -0.8    | 4.2962 | 21.43   | 0.1366 | 1.7033 |
| 4/19/2019 2:14 | 0.2917 | -0.525  | 3.9913 | -0.0667 | 4.3624 | 20.5818 | 0.1534 | 1.7162 |
| 4/19/2019 2:15 | 0.2667 | -0.4667 | 3.5669 | -0.1333 | 4.4195 | 20.42   | 0.1385 | 1.7178 |
| 4/19/2019 2:16 | 0.2667 | -0.8583 | 3.6899 | -0.1167 | 4.4136 | 20.34   | 0.1536 | 1.7465 |
| 4/19/2019 2:17 | 0.2083 | -0.35   | 3.4078 | 0.25    | 4.4772 | 20.43   | 0.1484 | 1.7283 |
| 4/19/2019 2:18 | 0.275  | -1.0083 | 3.8017 | -0.5833 | 4.4985 | 20.26   | 0.1467 | 1.7013 |
| 4/19/2019 2:19 | 0.3    | -0.7833 | 3.7431 | -0.75   | 4.4447 | 20      | 0.1522 | 1.7083 |
| 4/19/2019 2:20 | 0.3    | -0.2833 | 3.5495 | -0.45   | 4.455  | 19.8455 | 0.1384 | 1.7328 |
| 4/19/2019 2:21 | 0.3    | -0.3417 | 3.4292 | 0.2     | 4.5227 | 20.1818 | 0.1557 | 1.7253 |
| 4/19/2019 2:22 | 0.3    | -0.4833 | 3.5672 | -0.5    | 4.5032 | 20.1818 | 0.1394 | 1.7262 |
| 4/19/2019 2:23 | 0.3    | -0.4333 | 3.6103 | -0.8    | 4.5835 | 20.1091 | 0.1501 | 1.6988 |
| 4/19/2019 2:24 | 0.3    | -0.75   | 3.4936 | -0.7167 | 4.5545 | 20.2182 | 0.1463 | 1.6878 |
| 4/19/2019 2:25 | 0.2417 | 0.2583  | 3.6621 | -0.35   | 4.5478 | 20.39   | 0.1448 | 1.7102 |
| 4/19/2019 2:26 | 0.2    | -0.3667 | 3.5599 | -0.5333 | 4.5849 | 20.9778 | 0.1495 | 1.7051 |
| 4/19/2019 2:27 | 0.15   | 0.1583  | 3.7209 | -0.1833 | 4.663  | 21.7917 | 0.1358 | 1.6822 |
| 4/19/2019 2:28 | 0.1833 | 0.1417  | 3.5829 | -0.15   | 4.5878 | 21.9778 | 0.1546 | 1.6929 |
| 4/19/2019 2:29 | 0.2    | -0.1417 | 3.4838 | -0.4167 | 4.7153 | 22.1    | 0.141  | 1.737  |
| 4/19/2019 2:30 | 0.2333 | -0.675  | 3.3727 | -0.1833 | 4.7863 | 22.3818 | 0.15   | 1.7355 |
| 4/19/2019 2:31 | 0.2833 | -0.4083 | 3.6987 | -0.6333 | 4.755  | 22.5    | 0.1504 | 1.7328 |
| 4/19/2019 2:32 | 0.3    | -1.025  | 3.2905 | 0.05    | 4.9003 | 22.7091 | 0.1415 | 1.7369 |
| 4/19/2019 2:33 | 0.3    | -0.7667 | 3.4678 | -0.6333 | 4.839  | 22.97   | 0.1606 | 1.7563 |
| 4/19/2019 2:34 | 0.3    | 0.0583  | 3.6278 | -0.3    | 4.7746 | 22.93   | 0.1436 | 1.7159 |
| 4/19/2019 2:35 | 0.225  | -0.1083 | 3.5113 | -0.4167 | 4.7849 | 22.9182 | 0.1606 | 1.6978 |
| 4/19/2019 2:36 | 0.2    | 0.2417  | 3.4377 | -0.75   | 4.7973 | 22.9818 | 0.1507 | 1.7014 |
| 4/19/2019 2:37 | 0.2    | -0.1417 | 3.5827 | -0.0833 | 4.8438 | 22.91   | 0.1383 | 1.7245 |
| 4/19/2019 2:38 | 0.2    | -0.275  | 3.2998 | -0.2167 | 4.732  | 23      | 0.1545 | 1.7313 |



|                |        |         |        |         |        |         |        |        |
|----------------|--------|---------|--------|---------|--------|---------|--------|--------|
| 4/19/2019 2:39 | 0.2    | -0.3667 | 3.2993 | 0.2833  | 4.8201 | 23.0167 | 0.1367 | 1.717  |
| 4/19/2019 2:40 | 0.2    | 0.2     | 3.4245 | -0.0333 | 4.738  | 22.8273 | 0.1549 | 1.704  |
| 4/19/2019 2:41 | 0.2583 | -0.2917 | 3.411  | -0.6    | 4.8501 | 22.5667 | 0.1503 | 1.7063 |
| 4/19/2019 2:42 | 0.3    | -0.375  | 3.467  | -0.4167 | 4.9694 | 22.39   | 0.1545 | 1.7285 |
| 4/19/2019 2:43 | 0.3    | -0.0667 | 3.3788 | -0.1167 | 4.9709 | 22.4364 | 0.1497 | 1.7265 |
| 4/19/2019 2:44 | 0.275  | -0.7917 | 3.3835 | -0.65   | 4.8719 | 22.5    | 0.1433 | 1.7251 |
| 4/19/2019 2:45 | 0.2    | -0.15   | 3.3987 | -0.5    | 4.8409 | 22.5182 | 0.1565 | 1.7459 |
| 4/19/2019 2:46 | 0.1583 | 0.1417  | 3.5493 | 0.1667  | 4.8918 | 22.6222 | 0.146  | 1.7103 |
| 4/19/2019 2:47 | 0.2    | -0.0333 | 3.2853 | -0.45   | 5.0346 | 22.7273 | 0.1513 | 1.7198 |
| 4/19/2019 2:48 | 0.2    | -0.1917 | 3.5057 | -0.4833 | 5.0564 | 22.5182 | 0.1573 | 1.7395 |
| 4/19/2019 2:49 | 0.2    | -0.0083 | 3.4528 | -1.3833 | 5.0897 | 22.9    | 0.1451 | 1.7283 |
| 4/19/2019 2:50 | 0.1917 | -0.5167 | 3.3452 | -0.9167 | 5.2149 | 23      | 0.1611 | 1.716  |
| 4/19/2019 2:51 | 0.2    | -0.6583 | 3.5372 | -0.4833 | 5.0599 | 23.0889 | 0.1445 | 1.7326 |
| 4/19/2019 2:52 | 0.2    | 0.0667  | 3.4122 | -0.6833 | 4.8923 | 23.4364 | 0.1515 | 1.7272 |
| 4/19/2019 2:53 | 0.2    | 0.2333  | 3.228  | -0.5167 | 5.0673 | 23.71   | 0.1521 | 1.7299 |
| 4/19/2019 2:54 | 0.1833 | 0.0583  | 3.6082 | -0.35   | 5.035  | 24      | 0.1477 | 1.7507 |
| 4/19/2019 2:55 | 0.1    | -0.0833 | 4.0903 | -0.85   | 5.0608 | 24.1333 | 0.1621 | 1.7541 |
| 4/19/2019 2:56 | 0.1083 | -0.9083 | 3.4227 | -0.6167 | 5.0873 | 24.2273 | 0.1483 | 1.7271 |
| 4/19/2019 2:57 | 0.1667 | -0.8333 | 3.4238 | -0.3333 | 5.12   | 24.3556 | 0.1565 | 1.717  |
| 4/19/2019 2:58 | 0.2    | -0.5833 | 3.3922 | -0.25   | 5.0852 | 24.4    | 0.1625 | 1.7332 |
| 4/19/2019 2:59 | 0.2    | -0.7583 | 3.4118 | 0.0167  | 5.0548 | 24.42   | 0.1449 | 1.735  |
| 4/19/2019 3:00 | 0.2    | -0.9083 | 3.7813 | -0.2667 | 5.1269 | 24.6636 | 0.1607 | 1.7176 |
| 4/19/2019 3:01 | 0.2    | -0.3167 | 3.5748 | -0.85   | 5.2273 | 24.7    | 0.1492 | 1.7162 |
| 4/19/2019 3:02 | 0.2    | -0.1083 | 3.4763 | -0.2833 | 5.2203 | 24.6182 | 0.1568 | 1.7431 |
| 4/19/2019 3:03 | 0.2    | -0.75   | 3.1478 | -0.6167 | 5.3995 | 24.6667 | 0.1575 | 1.7406 |
| 4/19/2019 3:04 | 0.2    | -0.7    | 3.3927 | -0.4833 | 5.3384 | 24.6    | 0.1469 | 1.7238 |
| 4/19/2019 3:05 | 0.2    | -0.8833 | 3.7465 | -0.6333 | 5.1892 | 24.6909 | 0.162  | 1.7168 |
| 4/19/2019 3:06 | 0.2    | -0.3    | 3.5013 | -0.8    | 5.132  | 24.72   | 0.1477 | 1.7007 |
| 4/19/2019 3:07 | 0.2    | -0.575  | 3.354  | -0.5667 | 5.1734 | 24.8    | 0.1603 | 1.7078 |
| 4/19/2019 3:08 | 0.2    | -1.3167 | 3.3197 | -1.0333 | 5.2158 | 24.8    | 0.1508 | 1.7099 |
| 4/19/2019 3:09 | 0.2    | -0.9583 | 3.3423 | -0.5667 | 5.2656 | 24.7182 | 0.1556 | 1.7158 |
| 4/19/2019 3:10 | 0.2    | -0.1417 | 3.4803 | -0.5    | 5.267  | 24.67   | 0.1597 | 1.7193 |
| 4/19/2019 3:11 | 0.2    | -1.1833 | 3.3927 | -0.8667 | 5.2912 | 24.75   | 0.149  | 1.7322 |
| 4/19/2019 3:12 | 0.2    | -0.4    | 3.5928 | -0.4667 | 5.3293 | 24.8    | 0.1593 | 1.7315 |
| 4/19/2019 3:13 | 0.2    | -0.1917 | 3.4948 | -0.6333 | 5.1129 | 24.7727 | 0.1569 | 1.7381 |
| 4/19/2019 3:14 | 0.15   | -0.325  | 3.6222 | -0.3167 | 5.2343 | 24.87   | 0.1509 | 1.6974 |
| 4/19/2019 3:15 | 0.2    | -0.4083 | 3.3665 | -0.7833 | 5.3583 | 24.9455 | 0.1607 | 1.7159 |
| 4/19/2019 3:16 | 0.2    | -0.5167 | 3.6205 | -0.3833 | 5.3911 | 25.0111 | 0.1532 | 1.7326 |
| 4/19/2019 3:17 | 0.2    | -0.2917 | 3.351  | -0.1833 | 5.0902 | 25.01   | 0.1573 | 1.7174 |
| 4/19/2019 3:18 | 0.2    | 0.075   | 3.293  | -0.45   | 5.2469 | 25.0375 | 0.1521 | 1.7225 |
| 4/19/2019 3:19 | 0.2    | -0.7167 | 3.2983 | -0.8833 | 5.3343 | 25.03   | 0.1593 | 1.743  |
| 4/19/2019 3:20 | 0.2    | -0.5    | 3.2138 | -0.6    | 5.3539 | 25.1444 | 0.1599 | 1.729  |
| 4/19/2019 3:21 | 0.2    | -0.4167 | 3.116  | -1.1    | 5.29   | 25.2    | 0.1524 | 1.714  |
| 4/19/2019 3:22 | 0.2083 | 0.1417  | 3.291  | -0.5667 | 5.2841 | 25.3    | 0.1641 | 1.6998 |
| 4/19/2019 3:23 | 0.2    | 0.225   | 3.7173 | -0.3167 | 5.1911 | 25.27   | 0.1489 | 1.7172 |
| 4/19/2019 3:24 | 0.2    | -0.275  | 3.4193 | -0.6667 | 5.2772 | 25.22   | 0.1585 | 1.7063 |
| 4/19/2019 3:25 | 0.2    | -0.7333 | 3.4062 | -0.8167 | 5.2782 | 25.34   | 0.1545 | 1.7407 |

|                |        |         |        |         |        |         |        |        |
|----------------|--------|---------|--------|---------|--------|---------|--------|--------|
| 4/19/2019 3:26 | 0.1333 | -0.6667 | 3.5005 | -0.3167 | 5.2657 | 25.4    | 0.1497 | 1.7362 |
| 4/19/2019 3:27 | 0.1    | -0.5833 | 3.619  | -0.55   | 5.2558 | 25.4    | 0.1625 | 1.7397 |
| 4/19/2019 3:28 | 0.125  | -0.075  | 3.3008 | -0.15   | 5.2172 | 25.4    | 0.1416 | 1.7568 |
| 4/19/2019 3:29 | 0.2    | -0.9083 | 3.2383 | -0.3    | 5.2091 | 25.4    | 0.1633 | 1.7695 |
| 4/19/2019 3:30 | 0.2    | -0.4583 | 3.4318 | -0.25   | 5.157  | 25.4    | 0.1572 | 1.7714 |
| 4/19/2019 3:31 | 0.1917 | -0.5833 | 3.4078 | -0.3    | 5.183  | 25.4    | 0.1578 | 1.7495 |
| 4/19/2019 3:32 | 0.1083 | -1.0667 | 3.2567 | -0.5833 | 5.156  | 25.4    | 0.1608 | 1.7422 |
| 4/19/2019 3:33 | 0.1    | -0.4917 | 3.2677 | -0.9667 | 5.0955 | 25.4    | 0.1481 | 1.7477 |
| 4/19/2019 3:34 | 0.0917 | -1.1667 | 3.4965 | -0.3    | 5.0969 | 25.4    | 0.1635 | 1.7493 |
| 4/19/2019 3:35 | 0.1    | -0.7083 | 3.4322 | -0.8667 | 5.0888 | 25.4455 | 0.1485 | 1.7485 |
| 4/19/2019 3:36 | 0.1    | -0.5083 | 3.661  | -0.9833 | 5.0734 | 25.59   | 0.1546 | 1.7552 |
| 4/19/2019 3:37 | 0.0667 | -0.3833 | 3.2922 | -0.5833 | 5.1298 | 25.5583 | 0.1578 | 1.7459 |
| 4/19/2019 3:38 | 0      | -0.6083 | 3.3967 | -0.2167 | 5.0761 | 25.5    | 0.1514 | 1.747  |
| 4/19/2019 3:39 | 0      | -0.0083 | 3.5423 | -0.3667 | 5.0588 | 25.5364 | 0.1652 | 1.7248 |
| 4/19/2019 3:40 | 0      | -0.175  | 3.707  | -0.0333 | 5.0341 | 25.6    | 0.1479 | 1.7185 |
| 4/19/2019 3:41 | 0      | -0.0667 | 3.5673 | 0.1333  | 4.9909 | 25.6    | 0.1599 | 1.715  |
| 4/19/2019 3:42 | 0      | -0.5917 | 3.3077 | -0.5333 | 5.04   | 25.6182 | 0.1536 | 1.7441 |
| 4/19/2019 3:43 | 0.0455 | -0.5583 | 3.547  | -0.1667 | 5.0197 | 25.7    | 0.1522 | 1.7361 |
| 4/19/2019 3:44 | 0.1    | -0.5167 | 3.75   | -0.6667 | 4.9894 | 25.7727 | 0.1585 | 1.7493 |
| 4/19/2019 3:45 | 0.1    | -0.65   | 3.2118 | -0.9333 | 4.9958 | 25.78   | 0.1486 | 1.7479 |
| 4/19/2019 3:46 | 0.1    | -0.2417 | 3.246  | -0.2    | 5.0335 | 25.7    | 0.1611 | 1.7503 |
| 4/19/2019 3:47 | 0.1    | -0.625  | 3.4193 | -0.3333 | 4.9867 | 25.4818 | 0.1515 | 1.7699 |
| 4/19/2019 3:48 | 0.1    | -0.5917 | 3.4813 | -0.4    | 4.9872 | 25.2    | 0.1597 | 1.7491 |
| 4/19/2019 3:49 | 0.1    | -1.1833 | 3.6288 | -0.65   | 5.0193 | 25.1    | 0.1575 | 1.7391 |
| 4/19/2019 3:50 | 0.1083 | -0.3167 | 3.2442 | -0.4333 | 5.0155 | 25.0818 | 0.1465 | 1.7214 |
| 4/19/2019 3:51 | 0.2    | -0.725  | 3.5005 | 0.15    | 5.0311 | 25      | 0.1617 | 1.7187 |
| 4/19/2019 3:52 | 0.2    | -0.4333 | 3.0588 | -0.1833 | 4.9635 | 24.98   | 0.1472 | 1.7369 |
| 4/19/2019 3:53 | 0.2    | -0.9583 | 3.3702 | -0.9167 | 4.9083 | 24.9    | 0.1566 | 1.7298 |
| 4/19/2019 3:54 | 0.2    | 0       | 3.4647 | -0.05   | 4.9254 | 24.9    | 0.1561 | 1.745  |
| 4/19/2019 3:55 | 0.2    | -0.4917 | 3.222  | -0.5167 | 4.9917 | 24.8444 | 0.1558 | 1.7406 |
| 4/19/2019 3:56 | 0.2    | -0.7917 | 3.3368 | -0.3833 | 5.0866 | 24.8    | 0.1604 | 1.7353 |
| 4/19/2019 3:57 | 0.2    | -0.3833 | 3.5563 | 0.2333  | 5.1957 | 24.8    | 0.1423 | 1.7432 |
| 4/19/2019 3:58 | 0.1583 | -0.1417 | 3.2958 | -0.45   | 5.2415 | 24.9    | 0.1606 | 1.7334 |
| 4/19/2019 3:59 | 0.1167 | -0.2167 | 3.365  | -0.35   | 5.1411 | 24.9667 | 0.158  | 1.7424 |
| 4/19/2019 4:00 | 0.1917 | -0.8167 | 3.2547 | 0.1333  | 5.1361 | 25.1909 | 0.1505 | 1.7422 |
| 4/19/2019 4:01 | 0.2    | -0.55   | 3.1795 | -0.7333 | 5.1709 | 25.3333 | 0.1584 | 1.7263 |
| 4/19/2019 4:02 | 0.2    | -0.825  | 3.5008 | -0.6667 | 5.1651 | 25.4273 | 0.1528 | 1.7157 |
| 4/19/2019 4:03 | 0.1    | -0.4667 | 3.4764 | -0.6167 | 5.2261 | 25.5    | 0.1635 | 1.771  |
| 4/19/2019 4:04 | 0.1    | -1.1167 | 3.7338 | -0.4333 | 5.1344 | 25.5    | 0.1512 | 1.7518 |
| 4/19/2019 4:05 | 0.1    | 0.1583  | 3.3514 | -0.2167 | 5.2033 | 25.5455 | 0.1607 | 1.7471 |
| 4/19/2019 4:06 | 0.1    | 0.0917  | 3.7249 | -0.5667 | 5.1559 | 25.5    | 0.1625 | 1.7746 |
| 4/19/2019 4:07 | 0.1    | 0.0417  | 3.3417 | -0.75   | 5.1122 | 25.5    | 0.153  | 1.7464 |
| 4/19/2019 4:08 | 0.1    | -0.2917 | 3.395  | -0.5833 | 5.0492 | 25.5    | 0.1619 | 1.7393 |
| 4/19/2019 4:09 | 0.1    | -0.3    | 3.2062 | -0.3333 | 5.0615 | 25.5    | 0.1549 | 1.7491 |
| 4/19/2019 4:10 | 0.1    | -0.8083 | 3.4198 | -0.4167 | 5.1138 | 25.56   | 0.1649 | 1.7292 |
| 4/19/2019 4:11 | 0.1    | -0.425  | 2.8398 | -0.5833 | 5.113  | 25.6833 | 0.1581 | 1.7258 |
| 4/19/2019 4:12 | 0.0167 | -0.2167 | 3.2813 | -0.2333 | 5.1228 | 25.7667 | 0.1519 | 1.741  |

|                |         |         |        |         |        |         |        |        |
|----------------|---------|---------|--------|---------|--------|---------|--------|--------|
| 4/19/2019 4:13 | 0       | -0.4    | 3.6515 | -0.2833 | 5.2015 | 25.8182 | 0.1667 | 1.7257 |
| 4/19/2019 4:14 | 0       | -0.775  | 3.0998 | -0.15   | 5.217  | 25.9    | 0.1492 | 1.7151 |
| 4/19/2019 4:15 | 0       | -0.1833 | 3.2947 | -0.5667 | 5.1939 | 25.9417 | 0.1637 | 1.7018 |
| 4/19/2019 4:16 | 0       | -0.9667 | 3.318  | -0.8167 | 5.2927 | 26.0833 | 0.1476 | 1.7058 |
| 4/19/2019 4:17 | 0       | 0.1667  | 3.3008 | -0.5    | 5.2623 | 26.07   | 0.1609 | 1.704  |
| 4/19/2019 4:18 | 0       | -0.825  | 3.1893 | -0.4667 | 5.151  | 26.1545 | 0.158  | 1.7124 |
| 4/19/2019 4:19 | 0       | -0.4083 | 3.4218 | -0.0333 | 5.1687 | 26.2    | 0.1526 | 1.7076 |
| 4/19/2019 4:20 | 0       | -0.275  | 3.6055 | -0.2167 | 5.0021 | 26.2182 | 0.1657 | 1.71   |
| 4/19/2019 4:21 | 0       | -0.475  | 3.3104 | -0.2667 | 5.1476 | 26.3    | 0.1477 | 1.7271 |
| 4/19/2019 4:22 | -0.0167 | -0.0167 | 2.8794 | -0.75   | 5.1957 | 26.3273 | 0.162  | 1.7523 |
| 4/19/2019 4:23 | -0.1    | -0.0583 | 3.452  | -0.9167 | 4.9706 | 26.2167 | 0.1511 | 1.7668 |
| 4/19/2019 4:24 | -0.1    | 0.25    | 3.1042 | -0.6167 | 5.1564 | 26.2    | 0.1565 | 1.7425 |
| 4/19/2019 4:25 | -0.1    | -0.6917 | 3.4273 | -0.5    | 5.1948 | 26.15   | 0.1636 | 1.7177 |
| 4/19/2019 4:26 | -0.0417 | 0.025   | 3.149  | -0.4333 | 5.2379 | 26.1    | 0.1545 | 1.7406 |
| 4/19/2019 4:27 | 0       | -0.6667 | 3.6033 | -0.2167 | 5.2531 | 26      | 0.1643 | 1.7525 |
| 4/19/2019 4:28 | 0.0083  | -0.2583 | 3.2784 | -0.9667 | 5.1501 | 26      | 0.155  | 1.7443 |
| 4/19/2019 4:29 | 0.0083  | -0.9417 | 3.543  | -0.7833 | 5.2053 | 26      | 0.1622 | 1.7478 |
| 4/19/2019 4:30 | 0       | -0.2833 | 3.4179 | -0.6833 | 5.2511 | 25.8    | 0.1657 | 1.7358 |
| 4/19/2019 4:31 | 0       | 0.125   | 3.1327 | -0.8333 | 5.1759 | 25.7917 | 0.1512 | 1.7289 |
| 4/19/2019 4:32 | 0       | -0.5917 | 3.2608 | -0.8333 | 5.1536 | 25.7    | 0.161  | 1.7369 |
| 4/19/2019 4:33 | 0.0667  | -0.3    | 3.4867 | -1.2    | 5.2473 | 25.6333 | 0.1494 | 1.7235 |
| 4/19/2019 4:34 | 0.0583  | -0.0583 | 3.3046 | -0.3333 | 5.1957 | 25.65   | 0.1628 | 1.7199 |
| 4/19/2019 4:35 | 0.1     | -0.3667 | 3.2187 | -0.35   | 5.2168 | 25.72   | 0.1545 | 1.7203 |
| 4/19/2019 4:36 | 0.0167  | -0.15   | 3.4032 | -0.8333 | 5.2142 | 25.7167 | 0.1503 | 1.7273 |
| 4/19/2019 4:37 | 0.0333  | -0.5    | 3.2757 | -0.3333 | 5.2473 | 25.7727 | 0.1635 | 1.7241 |
| 4/19/2019 4:38 | 0.0333  | -0.2917 | 3.198  | -0.2667 | 5.1911 | 25.8455 | 0.1466 | 1.7027 |
| 4/19/2019 4:39 | 0.1     | -0.4167 | 3.1228 | -0.2    | 5.2887 | 26      | 0.164  | 1.7228 |
| 4/19/2019 4:40 | 0.1     | -0.45   | 3.1202 | -1.0167 | 5.224  | 26.0727 | 0.1538 | 1.7179 |
| 4/19/2019 4:41 | 0.1     | 0.2     | 3.1219 | -0.45   | 5.1039 | 26.1091 | 0.1547 | 1.7432 |
| 4/19/2019 4:42 | 0.1     | -0.425  | 3.3556 | 0.0667  | 5.1693 | 26.3273 | 0.157  | 1.7259 |
| 4/19/2019 4:43 | 0.1     | 0.1333  | 3.2802 | -0.5    | 5.1253 | 26.2273 | 0.1518 | 1.7063 |
| 4/19/2019 4:44 | 0.0583  | -0.9417 | 3.4492 | -0.7333 | 5.029  | 26.3    | 0.1671 | 1.7269 |
| 4/19/2019 4:45 | 0.0917  | -0.1333 | 3.0448 | -0.55   | 5.2011 | 26.39   | 0.1488 | 1.7293 |
| 4/19/2019 4:46 | 0.1     | 0.5583  | 3.2213 | -0.8167 | 5.1466 | 26.3833 | 0.1639 | 1.7535 |
| 4/19/2019 4:47 | 0.1833  | -0.3583 | 3.2344 | -0.3    | 5.1418 | 26.3273 | 0.1551 | 1.7489 |
| 4/19/2019 4:48 | 0.175   | 0.0167  | 3.374  | -1.05   | 5.2534 | 26.4727 | 0.1623 | 1.7363 |
| 4/19/2019 4:49 | 0.1     | -0.225  | 3.281  | -0.3    | 5.0506 | 26.5    | 0.1711 | 1.7332 |
| 4/19/2019 4:50 | 0.1     | -0.3917 | 3.654  | -0.1667 | 5.0104 | 26.5    | 0.1418 | 1.7348 |
| 4/19/2019 4:51 | 0.1     | -0.2667 | 3.328  | -0.9    | 5.1188 | 26.475  | 0.1659 | 1.7294 |
| 4/19/2019 4:52 | 0.1     | 0.025   | 3.3054 | -0.75   | 5.0806 | 26.4    | 0.1539 | 1.7584 |
| 4/19/2019 4:53 | 0.1     | -0.65   | 3.4778 | -0.2667 | 5.0667 | 26.4    | 0.1587 | 1.7399 |
| 4/19/2019 4:54 | 0.1     | 0.525   | 5.105  | -0.6333 | 5.068  | 26.3727 | 0.162  | 1.7391 |
| 4/19/2019 4:55 | 0.1     | -0.575  | 1.6426 | -0.55   | 5.0694 | 26.5417 | 0.1539 | 1.7309 |
| 4/19/2019 4:56 | 0.1083  | -0.2333 | 3.1677 | -0.2    | 4.9901 | 26.6    | 0.1652 | 1.739  |
| 4/19/2019 4:57 | 0.1     | -0.6417 | 3.3675 | -0.5667 | 4.9466 | 26.6    | 0.1476 | 1.7336 |
| 4/19/2019 4:58 | 0.1     | -0.7417 | 3.2123 | 0.05    | 5.0013 | 26.6    | 0.1522 | 1.7163 |
| 4/19/2019 4:59 | 0.1     | -0.35   | 3.3263 | -0.5333 | 4.9546 | 26.6917 | 0.1477 | 1.7503 |

|                |        |         |        |         |        |         |        |        |
|----------------|--------|---------|--------|---------|--------|---------|--------|--------|
| 4/19/2019 5:00 | 0.1    | -0.8417 | 3.2918 | -0.2    | 4.9549 | 26.6583 | 0.153  | 1.7576 |
| 4/19/2019 5:01 | 0.1    | -0.1    | 3.3738 | -0.8667 | 4.9624 | 26.5727 | 0.1589 | 1.7545 |
| 4/19/2019 5:02 | 0.15   | -0.5583 | 3.3359 | -1.1167 | 4.88   | 26.5    | 0.1483 | 1.7483 |
| 4/19/2019 5:03 | 0.2    | 0.0917  | 3.3149 | -1.15   | 4.8776 | 26.5    | 0.1614 | 1.7155 |
| 4/19/2019 5:04 | 0.2    | -0.1667 | 3.5239 | -0.2    | 4.8798 | 26.5    | 0.1448 | 1.7023 |
| 4/19/2019 5:05 | 0.2    | -0.35   | 3.5278 | -0.5333 | 4.891  | 26.5    | 0.1489 | 1.7179 |
| 4/19/2019 5:06 | 0.2    | -0.1167 | 3.1488 | -0.4    | 4.9058 | 26.5333 | 0.153  | 1.719  |
| 4/19/2019 5:07 | 0.2    | -0.925  | 3.5456 | -0.3    | 4.8713 | 26.5    | 0.144  | 1.728  |
| 4/19/2019 5:08 | 0.1917 | -0.7333 | 3.466  | 0       | 4.8563 | 26.5    | 0.1516 | 1.7393 |
| 4/19/2019 5:09 | 0.1    | -0.8833 | 3.7508 | 0.2     | 4.8707 | 26.41   | 0.141  | 1.7218 |
| 4/19/2019 5:10 | 0.1667 | -0.7417 | 3.8248 | -0.1167 | 4.8678 | 26.4778 | 0.1541 | 1.7163 |
| 4/19/2019 5:11 | 0.2    | -0.35   | 3.4079 | -0.05   | 4.9063 | 26.45   | 0.1517 | 1.7082 |
| 4/19/2019 5:12 | 0.2    | -0.3167 | 3.581  | -0.8833 | 4.901  | 26.5    | 0.1474 | 1.7218 |
| 4/19/2019 5:13 | 0.175  | -0.625  | 3.7637 | -0.2167 | 4.8987 | 26.5273 | 0.1528 | 1.7244 |
| 4/19/2019 5:14 | 0.1    | -0.425  | 3.2915 | -0.35   | 4.8548 | 26.6    | 0.1408 | 1.7113 |
| 4/19/2019 5:15 | 0.175  | -1.025  | 3.4053 | -0.2167 | 4.8504 | 26.6    | 0.1557 | 1.7176 |
| 4/19/2019 5:16 | 0.1583 | -0.5667 | 3.6177 | -0.5333 | 4.8792 | 26.6    | 0.1419 | 1.7318 |
| 4/19/2019 5:17 | 0.15   | -0.5    | 3.3163 | -0.0167 | 4.8412 | 26.6    | 0.1461 | 1.7401 |
| 4/19/2019 5:18 | 0.1    | -0.5583 | 3.4873 | -0.5167 | 4.7901 | 26.6    | 0.1432 | 1.7026 |
| 4/19/2019 5:19 | 0.0917 | -0.775  | 3.5134 | -0.2833 | 4.7615 | 26.67   | 0.1322 | 1.6973 |
| 4/19/2019 5:20 | 0.0167 | -0.5    | 3.6468 | -0.2833 | 4.8726 | 26.7    | 0.1542 | 1.6963 |
| 4/19/2019 5:21 | 0.0083 | -0.5167 | 3.696  | -1.0333 | 4.8224 | 26.78   | 0.1396 | 1.6783 |
| 4/19/2019 5:22 | 0      | 0       | 3.2504 | -0.45   | 4.8589 | 26.8    | 0.14   | 1.6973 |
| 4/19/2019 5:23 | 0      | -0.0833 | 3.3526 | -0.7    | 4.8158 | 26.84   | 0.1429 | 1.6987 |
| 4/19/2019 5:24 | 0      | -0.225  | 3.1128 | -0.3    | 4.932  | 26.9    | 0.1339 | 1.713  |
| 4/19/2019 5:25 | 0      | 0.1333  | 3.3693 | -1.05   | 4.9429 | 26.9    | 0.1461 | 1.7031 |
| 4/19/2019 5:26 | 0      | -1.2917 | 3.3948 | -0.85   | 4.9877 | 26.9182 | 0.1343 | 1.7252 |
| 4/19/2019 5:27 | 0      | 0.2333  | 3.3823 | -0.5    | 5.0113 | 26.9546 | 0.1309 | 1.7497 |
| 4/19/2019 5:28 | 0      | -0.1667 | 3.4397 | -0.3667 | 4.9679 | 26.9636 | 0.1481 | 1.7399 |
| 4/19/2019 5:29 | 0      | -0.6333 | 3.6111 | -0.7333 | 4.9365 | 26.92   | 0.1295 | 1.7143 |
| 4/19/2019 5:30 | 0      | -0.6167 | 3.2607 | 0.0167  | 4.8851 | 26.9364 | 0.1412 | 1.6845 |
| 4/19/2019 5:31 | 0      | -0.2833 | 3.2318 | -0.25   | 4.8331 | 26.9    | 0.1438 | 1.6709 |
| 4/19/2019 5:32 | 0.0167 | -0.275  | 3.167  | -0.2167 | 4.919  | 26.9273 | 0.1377 | 1.6964 |
| 4/19/2019 5:33 | 0.05   | -0.85   | 3.338  | -0.55   | 4.9105 | 27      | 0.1478 | 1.7103 |
| 4/19/2019 5:34 | 0.0417 | -0.2083 | 3.8778 | -0.5833 | 4.8208 | 27.025  | 0.1313 | 1.6922 |
| 4/19/2019 5:35 | 0.0833 | 0.175   | 3.6553 | -0.4    | 4.9211 | 27.1    | 0.1455 | 1.6912 |
| 4/19/2019 5:36 | 0.0667 | -0.95   | 3.5478 | -0.2    | 4.9995 | 27.1    | 0.1379 | 1.6703 |
| 4/19/2019 5:37 | 0.1    | -0.0417 | 3.1095 | -0.6167 | 4.9218 | 27.1    | 0.1328 | 1.687  |
| 4/19/2019 5:38 | 0.075  | 0.15    | 3.6328 | -0.0167 | 4.7898 | 27.1    | 0.1433 | 1.7026 |
| 4/19/2019 5:39 | 0.1    | -0.1417 | 3.4168 | -0.6833 | 4.8031 | 27.1    | 0.1292 | 1.7125 |
| 4/19/2019 5:40 | 0.1    | -0.2917 | 3.3483 | -0.2    | 4.9486 | 27.1    | 0.1436 | 1.6776 |
| 4/19/2019 5:41 | 0.1    | 0.0167  | 3.3852 | -0.5667 | 4.8804 | 27.1182 | 0.139  | 1.6732 |
| 4/19/2019 5:42 | 0.175  | -0.8167 | 3.0278 | -0.65   | 4.7658 | 27.1667 | 0.1277 | 1.6725 |
| 4/19/2019 5:43 | 0.1917 | -0.5    | 3.5367 | -0.75   | 4.8643 | 27.2    | 0.1452 | 1.6831 |
| 4/19/2019 5:44 | 0.2    | -0.55   | 3.6317 | -0.5    | 4.9223 | 27.225  | 0.13   | 1.6879 |
| 4/19/2019 5:45 | 0.2    | -0.0083 | 3.2837 | -0.7833 | 4.9371 | 27.2636 | 0.1411 | 1.6569 |
| 4/19/2019 5:46 | 0.2    | -1.075  | 3.8078 | -0.8833 | 4.8848 | 27.3    | 0.1392 | 1.6906 |

|                |        |         |        |         |        |         |        |        |
|----------------|--------|---------|--------|---------|--------|---------|--------|--------|
| 4/19/2019 5:47 | 0.1917 | -0.3833 | 3.4915 | -1.4167 | 4.922  | 27.2636 | 0.1302 | 1.7001 |
| 4/19/2019 5:48 | 0.1    | -0.5833 | 3.386  | -1.25   | 4.8504 | 27.3    | 0.1404 | 1.6895 |
| 4/19/2019 5:49 | 0.1    | 0.1333  | 3.4733 | -0.9    | 4.8838 | 27.3    | 0.1365 | 1.6977 |
| 4/19/2019 5:50 | 0.1    | -0.525  | 3.4192 | -0.3167 | 4.9138 | 27.3    | 0.1379 | 1.6852 |
| 4/19/2019 5:51 | 0.1    | 0.0667  | 3.5385 | -0.8    | 4.8991 | 27.3    | 0.14   | 1.6901 |
| 4/19/2019 5:52 | 0.1    | -0.2417 | 3.4762 | -0.4    | 4.9298 | 27.3    | 0.1276 | 1.6828 |
| 4/19/2019 5:53 | 0.1083 | 0.0083  | 3.4318 | -0.6    | 4.9092 | 27.3546 | 0.1346 | 1.684  |
| 4/19/2019 5:54 | 0.1    | -0.6667 | 3.4728 | -0.2    | 4.9584 | 27.4    | 0.1315 | 1.6871 |
| 4/19/2019 5:55 | 0.1667 | 0.475   | 3.7415 | -0.5667 | 4.9983 | 27.48   | 0.1363 | 1.687  |
| 4/19/2019 5:56 | 0.1    | -0.2583 | 3.3777 | -0.0667 | 5.138  | 27.5    | 0.138  | 1.6918 |
| 4/19/2019 5:57 | 0.1    | -0.9167 | 3.3598 | -0.2833 | 5.1633 | 27.575  | 0.1321 | 1.6848 |
| 4/19/2019 5:58 | 0.1    | -0.1333 | 3.4315 | -1.0167 | 5.1851 | 27.6    | 0.1415 | 1.6891 |
| 4/19/2019 5:59 | 0.1583 | -0.55   | 3.462  | -0.8333 | 5.1886 | 27.6667 | 0.1412 | 1.6944 |
| 4/19/2019 6:00 | 0.2    | -0.15   | 3.5833 | -0.7333 | 5.3173 | 27.725  | 0.1356 | 1.7075 |
| 4/19/2019 6:01 | 0.2    | -0.6417 | 3.3875 | -0.1    | 5.2677 | 27.8333 | 0.1434 | 1.6834 |
| 4/19/2019 6:02 | 0.175  | -0.725  | 3.4897 | -0.2833 | 5.3213 | 27.9917 | 0.1323 | 1.6813 |
| 4/19/2019 6:03 | 0.1    | -0.3    | 3.417  | -0.3    | 5.3382 | 28.1545 | 0.1445 | 1.6794 |
| 4/19/2019 6:04 | 0.1    | -0.4    | 3.517  | -0.1667 | 5.1469 | 28.3333 | 0.1395 | 1.7018 |
| 4/19/2019 6:05 | 0.1    | 0.3167  | 3.2598 | -0.1667 | 5.1759 | 28.3833 | 0.1293 | 1.698  |
| 4/19/2019 6:06 | 0.1583 | -0.425  | 3.4768 | -1.1    | 5.1724 | 28.4727 | 0.1439 | 1.691  |
| 4/19/2019 6:07 | 0.1    | -0.5417 | 3.459  | -0.5333 | 5.24   | 28.5    | 0.1317 | 1.6646 |
| 4/19/2019 6:08 | 0.1    | -0.4583 | 3.4382 | -0.3167 | 5.2333 | 28.5583 | 0.1297 | 1.7012 |
| 4/19/2019 6:09 | 0.1    | -0.5917 | 4.2123 | 0.4833  | 5.2202 | 28.5273 | 0.1478 | 1.7168 |
| 4/19/2019 6:10 | 0.1583 | -0.4667 | 2.8882 | -0.1333 | 5.2258 | 28.3273 | 0.1318 | 1.7154 |
| 4/19/2019 6:11 | 0.2    | -0.1917 | 3.4465 | -0.5    | 5.1513 | 28.6167 | 0.1403 | 1.9805 |
| 4/19/2019 6:12 | 0.2    | -0.0583 | 3.3155 | -0.7833 | 5.0794 | 29.1091 | 0.1425 | 3.4963 |
| 4/19/2019 6:13 | 0.2    | -0.65   | 3.1382 | -0.2667 | 5.089  | 29.5833 | 0.1356 | 1.9262 |
| 4/19/2019 6:14 | 0.2    | -0.2667 | 3.2062 | -0.2    | 5.0888 | 29.93   | 0.1426 | 1.7124 |
| 4/19/2019 6:15 | 0.125  | -0.0083 | 3.3328 | -0.6333 | 5.1873 | 30.125  | 0.1308 | 1.6968 |
| 4/19/2019 6:16 | 0.1    | -0.825  | 3.1577 | -0.5    | 5.0263 | 30.21   | 0.1422 | 1.6785 |
| 4/19/2019 6:17 | 0.1    | -0.6333 | 3.1842 | -0.7333 | 4.9573 | 30.3583 | 0.1404 | 1.707  |
| 4/19/2019 6:18 | 0.075  | -0.3167 | 3.1138 | -0.25   | 5.0218 | 30.3333 | 0.1386 | 1.7177 |
| 4/19/2019 6:19 | 0.1    | -0.3167 | 3.3672 | -0.6167 | 5.0729 | 30.375  | 0.1448 | 1.6928 |
| 4/19/2019 6:20 | 0.125  | -0.825  | 3.4148 | -0.05   | 5.1324 | 30.4    | 0.1354 | 1.6823 |
| 4/19/2019 6:21 | 0.2    | -0.3583 | 3.4348 | -0.2333 | 5.0442 | 30.4333 | 0.1428 | 1.6974 |
| 4/19/2019 6:22 | 0.2    | 0.175   | 3.4157 | -0.4    | 5.0315 | 30.7546 | 0.1441 | 1.6832 |
| 4/19/2019 6:23 | 0.2    | -0.0167 | 3.1888 | -0.0333 | 5.0172 | 30.6583 | 0.1311 | 1.6833 |
| 4/19/2019 6:24 | 0.2    | 0.0917  | 3.2832 | -0.3833 | 5.0733 | 30.22   | 0.1492 | 1.6722 |
| 4/19/2019 6:25 | 0.2    | -0.1333 | 3.546  | -0.3333 | 5.0628 | 29.6417 | 0.1392 | 1.6882 |
| 4/19/2019 6:26 | 0.2    | -0.3833 | 3.5205 | -0.1667 | 5.0498 | 29.2364 | 0.1416 | 1.7012 |
| 4/19/2019 6:27 | 0.2    | 0.4333  | 3.3917 | -0.8    | 5.0514 | 28.9546 | 0.1464 | 1.692  |
| 4/19/2019 6:28 | 0.1917 | -0.5    | 2.9805 | -0.6667 | 5.1054 | 28.8    | 0.1345 | 1.7144 |
| 4/19/2019 6:29 | 0.1083 | 0.0833  | 3.2017 | -1.1167 | 5.1282 | 28.8    | 0.1472 | 1.714  |
| 4/19/2019 6:30 | 0.1    | 0.2167  | 3.4033 | -0.6    | 5.1683 | 28.8    | 0.1441 | 1.7158 |
| 4/19/2019 6:31 | 0.1    | -0.575  | 3.4578 | -0.6333 | 5.1395 | 28.8818 | 0.1363 | 1.7388 |
| 4/19/2019 6:32 | 0.1    | 0.0333  | 3.555  | -0.6333 | 5.168  | 28.9    | 0.1468 | 1.7369 |
| 4/19/2019 6:33 | 0.1909 | -0.3083 | 3.0633 | -0.6333 | 5.2176 | 28.9    | 0.1346 | 1.7383 |

|                |        |         |         |         |         |         |        |        |
|----------------|--------|---------|---------|---------|---------|---------|--------|--------|
| 4/19/2019 6:34 | 0.2    | -0.2667 | 3.305   | -0.7    | 5.1038  | 28.94   | 0.1429 | 1.7102 |
| 4/19/2019 6:35 | 0.175  | 0.225   | 3.3128  | -0.3167 | 5.1148  | 29      | 0.1466 | 1.7099 |
| 4/19/2019 6:36 | 0.1    | -0.4333 | 3.2468  | -0.05   | 5.1323  | 29.025  | 0.1364 | 1.7419 |
| 4/19/2019 6:37 | 0.075  | 0.4083  | 3.4225  | -0.7333 | 5.0327  | 29.1333 | 0.1443 | 1.7349 |
| 4/19/2019 6:38 | 0      | -0.25   | 3.084   | -1.3667 | 5.074   | 29.25   | 0.1423 | 1.7024 |
| 4/19/2019 6:39 | 0      | -0.2333 | 3.1637  | -1.2333 | 5.0018  | 29.3    | 0.1358 | 1.7107 |
| 4/19/2019 6:40 | 0.0917 | -0.1333 | 3.7438  | -0.9    | 5.0585  | 29.3182 | 0.1508 | 1.734  |
| 4/19/2019 6:41 | 0.1    | 0.15    | 3.1368  | 0.1333  | 5.2012  | 29.4    | 0.133  | 1.7101 |
| 4/19/2019 6:42 | 0      | -0.125  | 3.2697  | -0.7333 | 5.1605  | 29.4    | 0.1499 | 1.7056 |
| 4/19/2019 6:43 | 0      | 0.0167  | 3.3948  | -0.1333 | 5.1635  | 29.4833 | 0.1448 | 1.6873 |
| 4/19/2019 6:44 | 0      | -0.275  | 3.1208  | -0.5    | 5.2331  | 29.5636 | 0.1379 | 1.6761 |
| 4/19/2019 6:45 | 0      | 0.1667  | 3.2668  | -0.5333 | 5.1406  | 29.6727 | 0.1492 | 1.7065 |
| 4/19/2019 6:46 | 0      | -0.1333 | 3.1687  | -0.2    | 5.1575  | 29.825  | 0.1415 | 1.7305 |
| 4/19/2019 6:47 | 0      | 0.175   | 3.1032  | 0.0833  | 5.3127  | 29.9    | 0.1403 | 1.7441 |
| 4/19/2019 6:48 | 0.0083 | -0.5667 | 3.2102  | -0.4    | 5.2901  | 29.9818 | 0.1542 | 1.9099 |
| 4/19/2019 6:49 | 0.05   | -0.7083 | 3.1272  | -0.9    | 5.292   | 30.0333 | 0.1378 | 1.9646 |
| 4/19/2019 6:50 | 0.1    | -0.3833 | 3.423   | -0.4    | 5.3679  | 30.1    | 0.1505 | 1.852  |
| 4/19/2019 6:51 | 0.0583 | -0.0417 | 3.3753  | -0.3    | 5.3896  | 30.1909 | 0.1486 | 1.7655 |
| 4/19/2019 6:52 | 0      | -0.1417 | 3.2628  | -0.0833 | 5.3458  | 30.2636 | 0.1411 | 1.7493 |
| 4/19/2019 6:53 | 0      | -0.4    | 3.1295  | -0.1667 | 5.3463  | 30.2    | 0.1479 | 1.7535 |
| 4/19/2019 6:54 | 0      | -0.0667 | 3.3597  | -0.2667 | 5.3561  | 30.2636 | 0.144  | 1.8297 |
| 4/19/2019 6:55 | 0.075  | -0.0083 | 3.399   | -0.45   | 5.3496  | 30.3    | 0.149  | 1.7911 |
| 4/19/2019 6:56 | 0.1    | -0.8167 | 3.2587  | -0.1333 | 5.3623  | 30.3    | 0.1535 | 1.8165 |
| 4/19/2019 6:57 | 0.1    | 0.4083  | 3.2342  | -0.2667 | 5.3767  | 30.3    | 0.1378 | 1.8343 |
| 4/19/2019 6:58 | 0.1    | -0.1667 | 2.9933  | -0.5833 | 5.4018  | 30.3    | 0.1518 | 1.7791 |
| 4/19/2019 6:59 | 0.1    | -0.525  | 3.2208  | -0.7167 | 5.4018  | 30.2917 | 0.1445 | 1.8113 |
| 4/19/2019 7:00 | 0.0417 | -0.4417 | 3.2082  | -0.65   | 5.3803  | 30.15   | 0.1447 | 1.8225 |
| 4/19/2019 7:01 | 0.0667 | -0.0417 | 3.1198  | -1.1167 | 5.3663  | 30.2    | 0.1534 | 1.8168 |
| 4/19/2019 7:02 | 0.0333 | -0.2583 | 3.1052  | -0.6333 | 5.3433  | 30.25   | 0.1442 | 1.7862 |
| 4/19/2019 7:03 | 0.0083 | -0.3667 | 3.2983  | -0.4833 | 5.3862  | 30.0727 | 0.1543 | 1.7852 |
| 4/19/2019 7:04 | 0.0917 | -0.5333 | 3.1442  | -1.0833 | 5.3731  | 29.6    | 0.1533 | 1.8188 |
| 4/19/2019 7:05 | 0.0083 | 0.1083  | 3.2076  | -0.5833 | 5.3896  | 29.6    | 0.1418 | 1.8271 |
| 4/19/2019 7:06 | 0.0917 | -0.4667 | 3.1275  | -0.3333 | 5.3899  | 29.675  | 0.1589 | 1.8598 |
| 4/19/2019 7:07 | 0.0583 | 0.5833  | 3.4818  | -0.2833 | 5.3961  | 29.7222 | 0.1509 | 1.8171 |
| 4/19/2019 7:08 | 0.1    | 0.1583  | 3.1265  | -0.5667 | 5.416   | 29.8    | 0.1536 | 1.8003 |
| 4/19/2019 7:09 | 0.1    | 0.0083  | 3.1583  | -0.4167 | 5.4115  | 29.8546 | 0.1583 | 1.8074 |
| 4/19/2019 7:10 | 0.1167 | 0.0333  | 3.4458  | -0.7333 | 5.4473  | 29.9    | 0.1447 | 1.8125 |
| 4/19/2019 7:11 | 0.1917 | 0.4333  | 2.8987  | -0.7833 | 5.4293  | 29.9    | 0.1581 | 1.7915 |
| 4/19/2019 7:12 | 0.2    | 0.4667  | 2.881   | -0.9833 | 5.4053  | 30.04   | 0.1566 | 1.8122 |
| 4/19/2019 7:13 | 0.2    | -0.4917 | 3.2951  | -0.3    | 5.3774  | 30.1727 | 0.1454 | 1.7926 |
| 4/19/2019 7:14 | 0.2    | -0.8167 | 3.4588  | -0.45   | 5.398   | 30.1727 | 0.1563 | 1.8273 |
| 4/19/2019 7:15 | 0.2    | 0.3     | 3.3101  | -0.5333 | 5.398   | 30.2636 | 0.1483 | 1.8634 |
| 4/19/2019 7:16 | 0.2    | -0.0583 | 3.2758  | -0.2667 | 5.3933  | 30.8364 | 0.1518 | 1.8345 |
| 4/19/2019 7:17 | 0.1917 | -0.3333 | 3.2969  | -0.3    | 5.4809  | 31.1636 | 0.1567 | 1.8568 |
| 4/19/2019 7:18 | 0.1833 | 0.3667  | 4.0137  | -0.65   | 6.2731  | 31.45   | 0.1733 | 1.887  |
| 4/19/2019 7:19 | 0.175  | 0.3     | 7.2578  | 0.25    | 8.4864  | 32.1    | 0.288  | 2.0027 |
| 4/19/2019 7:20 | 0.2    | 0.3083  | 11.1419 | 1.4167  | 11.8373 | 33.6818 | 0.4329 | 2.1414 |

|                |        |         |         |        |         |         |        |        |
|----------------|--------|---------|---------|--------|---------|---------|--------|--------|
| 4/19/2019 7:21 | 0.2    | -0.3333 | 14.9567 | 2.0667 | 12.8174 | 35.4455 | 0.762  | 2.1303 |
| 4/19/2019 7:22 | 0.2    | -0.0833 | 16.0092 | 2.1    | 13.3944 | 37.8    | 0.7685 | 1.997  |
| 4/19/2019 7:23 | 0.2    | -0.025  | 17.3633 | 2.2    | 14.2763 | 40.3818 | 1.0225 | 1.9586 |
| 4/19/2019 7:24 | 0.2    | 0.55    | 16.5    | 2.6    | 14.2878 | 43.2833 | 1.0466 | 1.9489 |
| 4/19/2019 7:25 | 0.2    | -0.0333 | 16.6625 | 2.45   | 14.3499 | 46.425  | 1.0069 | 1.9623 |
| 4/19/2019 7:26 | 0.2    | -0.3583 | 16.2658 | 2.25   | 14.1955 | 49.3091 | 0.9215 | 1.9756 |
| 4/19/2019 7:27 | 0.2    | -0.45   | 15.765  | 2.4667 | 13.9312 | 52.4364 | 0.897  | 1.9668 |
| 4/19/2019 7:28 | 0.175  | 0.8417  | 15.7425 | 2.4    | 13.7736 | 55.125  | 0.873  | 1.9939 |
| 4/19/2019 7:29 | 0.2    | 0.5667  | 15.5067 | 2.6333 | 13.8283 | 57.9667 | 0.8922 | 1.964  |
| 4/19/2019 7:30 | 0.1083 | -0.1917 | 14.5325 | 1.8667 | 13.5383 | 60.575  | 0.8667 | 1.9897 |
| 4/19/2019 7:31 | 0.1083 | -0.175  | 15.1258 | 2.5833 | 13.5878 | 62.88   | 0.8706 | 1.9978 |
| 4/19/2019 7:32 | 0.1    | 0.3417  | 14.9367 | 2.1333 | 13.479  | 64.4167 | 0.8764 | 1.9838 |
| 4/19/2019 7:33 | 0.1    | 0.4333  | 14.7658 | 1.4667 | 13.4272 | 65.3091 | 0.8758 | 2.0161 |
| 4/19/2019 7:34 | 0.1917 | -0.4917 | 14.9667 | 2.3167 | 13.2375 | 65.8667 | 0.8528 | 2.0071 |
| 4/19/2019 7:35 | 0.2    | 0.475   | 14.0267 | 1.8    | 13.2119 | 66.0545 | 0.8711 | 2.0259 |
| 4/19/2019 7:36 | 0.225  | -0.1333 | 14.1317 | 2.1    | 13.1373 | 65.8273 | 0.8627 | 2.0198 |
| 4/19/2019 7:37 | 0.3    | 0.2167  | 14.1342 | 2      | 13.0344 | 65.45   | 0.8578 | 2.0135 |
| 4/19/2019 7:38 | 0.2917 | 0.15    | 13.7167 | 1.7333 | 12.8308 | 65.0273 | 0.8484 | 2.0039 |
| 4/19/2019 7:39 | 0.2    | -0.5917 | 12.9192 | 1.8833 | 12.5759 | 64.625  | 0.8178 | 2.0298 |
| 4/19/2019 7:40 | 0.2    | 0.025   | 12.8225 | 1.8    | 12.5463 | 64.3182 | 0.8383 | 2.0475 |
| 4/19/2019 7:41 | 0.2    | 0.2917  | 12.71   | 1.7667 | 12.514  | 64      | 0.8188 | 2.055  |
| 4/19/2019 7:42 | 0.1917 | 0.2167  | 12.3517 | 1.35   | 12.3822 | 63.5455 | 0.8178 | 2.0306 |
| 4/19/2019 7:43 | 0.1333 | 0.2417  | 12.6542 | 1.5167 | 12.3167 | 63.3    | 0.8185 | 2.0546 |
| 4/19/2019 7:44 | 0.2    | 0.2417  | 12.7117 | 1.3    | 12.3166 | 62.9583 | 0.8167 | 2.054  |
| 4/19/2019 7:45 | 0.2    | 0.2     | 11.9425 | 1      | 12.0872 | 62.5455 | 0.8127 | 2.0899 |
| 4/19/2019 7:46 | 0.2    | -0.1167 | 11.7775 | 1.2667 | 11.9785 | 62.18   | 0.7929 | 2.0988 |
| 4/19/2019 7:47 | 0.2    | -0.3083 | 11.7433 | 1.4667 | 11.9073 | 61.85   | 0.7986 | 2.0893 |
| 4/19/2019 7:48 | 0.2    | -0.0417 | 11.8567 | 1.25   | 11.9161 | 61.5167 | 0.8073 | 2.0651 |
| 4/19/2019 7:49 | 0.1833 | 0.0583  | 11.9192 | 0.9    | 11.7978 | 61.1727 | 0.7856 | 2.0776 |
| 4/19/2019 7:50 | 0.1    | -0.1167 | 11.5367 | 1.3    | 11.6992 | 60.8333 | 0.7964 | 2.0539 |
| 4/19/2019 7:51 | 0.1    | 0.1083  | 11.4175 | 1.0333 | 11.6431 | 60.4909 | 0.7846 | 2.0538 |
| 4/19/2019 7:52 | 0.1    | -0.1167 | 11.1467 | 1.15   | 11.5189 | 60.1818 | 0.7749 | 2.0528 |
| 4/19/2019 7:53 | 0.0333 | 0.15    | 10.9925 | 0.8833 | 11.4358 | 59.7364 | 0.7832 | 2.0452 |
| 4/19/2019 7:54 | 0      | -0.625  | 11.0492 | 1.25   | 11.3564 | 59.2583 | 0.7634 | 2.0788 |
| 4/19/2019 7:55 | 0      | 0.3     | 10.9633 | 1      | 11.3015 | 59      | 0.7667 | 2.1073 |
| 4/19/2019 7:56 | 0      | 0.05    | 10.4223 | 0.7667 | 11.2185 | 58.6    | 0.7573 | 2.1055 |
| 4/19/2019 7:57 | 0      | -0.3333 | 10.8067 | 1.6667 | 11.1453 | 58.17   | 0.746  | 2.1159 |
| 4/19/2019 7:58 | 0      | 0.0667  | 10.5917 | 1.9167 | 11.0726 | 57.9909 | 0.7662 | 2.0868 |
| 4/19/2019 7:59 | 0      | 0.5083  | 10.2692 | 1.55   | 10.9574 | 57.8546 | 0.7412 | 2.099  |
| 4/19/2019 8:00 | 0      | 0.3917  | 10.485  | 1.8    | 10.9036 | 57.6182 | 0.7425 | 2.0651 |
| 4/19/2019 8:01 | 0      | 0.4083  | 10.2942 | 1.3667 | 10.8233 | 57.3455 | 0.7512 | 2.0778 |
| 4/19/2019 8:02 | 0      | 0.2     | 9.8287  | 0.65   | 10.7694 | 57.0636 | 0.7278 | 2.0889 |
| 4/19/2019 8:03 | 0      | 0.4167  | 9.422   | 1.1    | 10.6781 | 56.8727 | 0.7392 | 2.1453 |
| 4/19/2019 8:04 | 0.05   | 0.6083  | 9.7747  | 0.7667 | 10.6024 | 56.6636 | 0.7174 | 2.1034 |
| 4/19/2019 8:05 | 0.0667 | 0.05    | 9.7508  | 1.0833 | 10.5503 | 56.4    | 0.7167 | 2.0904 |
| 4/19/2019 8:06 | 0.1    | -0.0083 | 9.7736  | 0.9167 | 10.5043 | 56.4167 | 0.7193 | 2.0918 |
| 4/19/2019 8:07 | 0.1    | -0.3333 | 9.1148  | 1.0833 | 10.4288 | 56.21   | 0.6936 | 2.109  |

|                |        |         |        |        |         |         |        |        |
|----------------|--------|---------|--------|--------|---------|---------|--------|--------|
| 4/19/2019 8:08 | 0.1    | 0       | 9.3142 | 1.0333 | 10.368  | 55.8    | 0.7109 | 2.111  |
| 4/19/2019 8:09 | 0.1    | -0.1333 | 9.2113 | 0.9333 | 10.317  | 55.8    | 0.6974 | 2.088  |
| 4/19/2019 8:10 | 0.1    | -0.425  | 9.6504 | 1.35   | 10.248  | 55.6667 | 0.6937 | 2.1079 |
| 4/19/2019 8:11 | 0.175  | 0.3     | 9.2872 | 0.9333 | 10.182  | 55.4818 | 0.6965 | 2.1085 |
| 4/19/2019 8:12 | 0.1917 | -0.0917 | 8.9992 | 1.0833 | 10.132  | 55.2083 | 0.6833 | 2.0914 |
| 4/19/2019 8:13 | 0.1833 | 0.0583  | 9.3067 | 0.6    | 10.0874 | 55.0417 | 0.7004 | 2.0812 |
| 4/19/2019 8:14 | 0.1273 | 0.2917  | 9.1402 | 0.7    | 10.0278 | 54.875  | 0.6982 | 2.1212 |
| 4/19/2019 8:15 | 0.1167 | 0.3083  | 8.8317 | 0.7833 | 9.9932  | 54.7    | 0.6745 | 2.1228 |
| 4/19/2019 8:16 | 0.175  | 0.3     | 9.2748 | 0.6333 | 9.993   | 54.6167 | 0.6795 | 2.11   |
| 4/19/2019 8:17 | 0.2    | -0.2417 | 8.8208 | 0.3333 | 9.9303  | 54.5818 | 0.6783 | 2.1461 |
| 4/19/2019 8:18 | 0.2    | 0.1333  | 8.7683 | 0.7667 | 9.8     | 54.55   | 0.6766 | 2.126  |
| 4/19/2019 8:19 | 0.2    | 0.0333  | 8.672  | 0.55   | 9.7465  | 54.4455 | 0.6697 | 2.0703 |
| 4/19/2019 8:20 | 0.2    | 0.0417  | 8.5807 | 0.9667 | 9.6759  | 54.5167 | 0.656  | 2.0817 |
| 4/19/2019 8:21 | 0.2    | -0.1667 | 8.551  | 0.3833 | 9.6388  | 54.3455 | 0.6658 | 2.1443 |
| 4/19/2019 8:22 | 0.2    | 0.2417  | 8.8098 | 0.25   | 9.6075  | 54.2273 | 0.6629 | 2.1623 |
| 4/19/2019 8:23 | 0.2    | 0.0583  | 8.4807 | 0.35   | 9.5192  | 53.9917 | 0.6468 | 2.1509 |
| 4/19/2019 8:24 | 0.2083 | -0.25   | 8.4143 | 0.7167 | 9.5023  | 53.5083 | 0.6558 | 2.1256 |
| 4/19/2019 8:25 | 0.2    | -0.35   | 8.1239 | 1.0333 | 9.4746  | 53.125  | 0.6416 | 2.1458 |
| 4/19/2019 8:26 | 0.2    | 0.3167  | 8.383  | 0.5833 | 9.4093  | 52.95   | 0.6474 | 2.1502 |
| 4/19/2019 8:27 | 0.1333 | 0.1     | 8.3869 | 0.45   | 9.355   | 52.7833 | 0.6455 | 2.1607 |
| 4/19/2019 8:28 | 0.1    | -0.2333 | 7.8508 | 0.5    | 9.2482  | 52.5917 | 0.6339 | 2.1533 |
| 4/19/2019 8:29 | 0.1    | -0.0167 | 8.1248 | 0.8667 | 9.2222  | 52.3333 | 0.6322 | 2.116  |
| 4/19/2019 8:30 | 0.1    | -0.075  | 7.8533 | 1.2    | 9.1893  | 52.125  | 0.6246 | 2.0774 |
| 4/19/2019 8:31 | 0.1    | -0.1    | 7.9272 | 0.45   | 9.145   | 51.9455 | 0.6259 | 2.1167 |
| 4/19/2019 8:32 | 0.1    | 0.0667  | 7.8257 | 0.4667 | 9.1138  | 51.575  | 0.6278 | 2.1394 |
| 4/19/2019 8:33 | 0.1    | -0.4083 | 7.6268 | 0.3667 | 9.0774  | 51.275  | 0.6111 | 2.1178 |
| 4/19/2019 8:34 | 0.1    | -1.1167 | 7.6403 | 0.7    | 9.0219  | 50.9909 | 0.629  | 2.1197 |
| 4/19/2019 8:35 | 0.1    | -0.3333 | 7.8425 | 0.8    | 8.9924  | 50.7727 | 0.6067 | 2.1179 |
| 4/19/2019 8:36 | 0.1    | 0.475   | 7.3622 | 0.5667 | 8.9362  | 50.5273 | 0.6051 | 2.1118 |
| 4/19/2019 8:37 | 0.1    | -0.2333 | 7.1268 | 0.4833 | 8.943   | 50.5727 | 0.5884 | 2.1165 |
| 4/19/2019 8:38 | 0.1583 | -0.1167 | 6.9293 | 0.45   | 9.1063  | 50      | 0.5592 | 2.0963 |
| 4/19/2019 8:39 | 0.2667 | 0.3     | 6.5302 | 0.8667 | 9.4736  | 49.2818 | 0.5204 | 2.0319 |
| 4/19/2019 8:40 | 0.4167 | 0.7583  | 5.9413 | 0.8    | 9.8113  | 48.6833 | 0.4716 | 1.9642 |
| 4/19/2019 8:41 | 0.575  | 0.8     | 5.8413 | 0.9833 | 10.0425 | 48.1    | 0.4383 | 1.9187 |
| 4/19/2019 8:42 | 0.6333 | 0.7167  | 5.3277 | 1.15   | 10.2637 | 47.2417 | 0.4202 | 1.9016 |
| 4/19/2019 8:43 | 0.7    | 0.4417  | 5.2418 | 0.85   | 10.5285 | 46.3    | 0.38   | 1.8332 |
| 4/19/2019 8:44 | 0.7    | 0.9083  | 4.7113 | 0.8833 | 10.6271 | 45.3    | 0.3671 | 1.7533 |
| 4/19/2019 8:45 | 0.725  | 0.8833  | 4.6122 | 1.25   | 10.7749 | 44.5091 | 0.3649 | 1.7534 |
| 4/19/2019 8:46 | 0.8    | 1.6583  | 4.3363 | 1.4667 | 10.8584 | 43.1909 | 0.3286 | 1.7178 |
| 4/19/2019 8:47 | 0.875  | 1.175   | 4.4745 | 0.5    | 10.9519 | 41.7818 | 0.3233 | 1.7116 |
| 4/19/2019 8:48 | 0.9833 | 1.35    | 4.5187 | 0.5167 | 10.933  | 40.6091 | 0.2998 | 1.6771 |
| 4/19/2019 8:49 | 1.1    | 1.15    | 4.7592 | 1.7833 | 10.9153 | 39.4182 | 0.2922 | 1.6743 |
| 4/19/2019 8:50 | 1.3333 | 1.55    | 4.6648 | 2.3    | 10.7571 | 38.1    | 0.2862 | 1.6583 |
| 4/19/2019 8:51 | 1.7    | 2.2417  | 5.125  | 2.8667 | 10.7405 | 37.1364 | 0.2609 | 1.6613 |
| 4/19/2019 8:52 | 2.1083 | 2.6333  | 5.4747 | 3.0167 | 10.7139 | 35.7    | 0.2586 | 1.6378 |
| 4/19/2019 8:53 | 2.475  | 3.15    | 4.3473 | 2.5167 | 10.7918 | 34.0727 | 0.2482 | 1.5834 |
| 4/19/2019 8:54 | 2.8727 | 3.9     | 4.652  | 3.65   | 10.779  | 32.3583 | 0.2322 | 1.5556 |



|                |         |        |          |         |         |          |        |        |
|----------------|---------|--------|----------|---------|---------|----------|--------|--------|
| 4/19/2019 8:55 | 3.0917  | 3.6583 | 5.5765   | 3.8333  | 10.7888 | 31.13    | 0.2337 | 1.5693 |
| 4/19/2019 8:56 | 3.3167  | 3.6417 | 5.3678   | 3.65    | 10.811  | 30.15    | 0.2226 | 1.5778 |
| 4/19/2019 8:57 | 3.3917  | 3.6333 | 5.3648   | 3.6167  | 10.7795 | 29.2273  | 0.232  | 1.5448 |
| 4/19/2019 8:58 | 3.4833  | 3.9833 | 5.7575   | 3.5333  | 10.637  | 28.3583  | 0.2249 | 1.5249 |
| 4/19/2019 8:59 | 3.5667  | 4.025  | 5.874    | 3.8167  | 10.4559 | 27.7     | 0.2111 | 1.5258 |
| 4/19/2019 9:00 | 3.7583  | 4.3917 | 5.787    | 4.4833  | 10.3401 | 27.0182  | 0.2153 | 1.5212 |
| 4/19/2019 9:01 | 3.85    | 4.1417 | 6.058    | 4.15    | 10.4042 | 26.2546  | 0.2095 | 1.5049 |
| 4/19/2019 9:02 | 3.95    | 4.525  | 6.1587   | 4.1333  | 10.0973 | 25.6091  | 0.205  | 1.5141 |
| 4/19/2019 9:03 | 4.1167  | 3.625  | 5.975    | 4.8333  | 9.9474  | 25.0909  | 0.2081 | 1.4904 |
| 4/19/2019 9:04 | 4.2167  | 4.075  | 6.1353   | 4.5     | 9.8372  | 24.725   | 0.1898 | 1.4965 |
| 4/19/2019 9:05 | 4.35    | 4.4333 | 6.4217   | 4.3833  | 9.7375  | 24.4091  | 0.1984 | 1.4893 |
| 4/19/2019 9:06 | 4.4083  | 5.4    | 6.583    | 4.8667  | 9.5497  | 24.5833  | 0.1995 | 1.4444 |
| 4/19/2019 9:07 | 4.5333  | 5.5667 | 6.5727   | 5.25    | 9.4188  | 24.4091  | 0.1839 | 1.4741 |
| 4/19/2019 9:08 | 4.7333  | 5.4417 | 6.7698   | 5.2167  | 9.3196  | 23.9636  | 0.1932 | 1.4755 |
| 4/19/2019 9:09 | 4.75    | 5      | 6.495    | 4.6667  | 9.4303  | 23.5546  | 0.1883 | 1.4699 |
| 4/19/2019 9:10 | 4.8083  | 4.825  | 6.8097   | 5.05    | 9.3938  | 23.2091  | 0.18   | 1.4424 |
| 4/19/2019 9:11 | 4.8     | 5.075  | 6.6797   | 5.1833  | 9.3292  | 22.925   | 0.1927 | 1.4573 |
| 4/19/2019 9:12 | 4.8583  | 5.7333 | 6.8218   | 5.1667  | 9.2699  | 22.56    | 0.1707 | 1.4808 |
| 4/19/2019 9:13 | 4.8583  | 5.4833 | 6.675    | 5.5833  | 9.2299  | 22.25    | 0.1815 | 1.4371 |
| 4/19/2019 9:14 | 4.9333  | 5.5    | 6.6925   | 5.1333  | 9.1243  | 21.8818  | 0.1831 | 1.413  |
| 4/19/2019 9:15 | 4.9917  | 5.425  | 6.7242   | 5.2167  | 9.0518  | 21.4546  | 0.1692 | 1.4199 |
| 4/19/2019 9:16 | 5.0083  | 5.775  | 6.713    | 5.2833  | 9.2188  | 21.13    | 0.1692 | 1.4007 |
| 4/19/2019 9:17 | 4.7833  | 4.225  | 5.8408   | 4.3333  | 9.211   | 20.5083  | 0.1784 | 1.4231 |
| 4/19/2019 9:18 | 4.5     | 3.9    | 10.8542  | 4.2333  | 9.3003  | 19.3     | 0.164  | 1.405  |
| 4/19/2019 9:19 | 4.175   | 3.45   | 5.825    | 3.7833  | 9.5584  | 17.83    | 0.1801 | 1.3816 |
| 4/19/2019 9:20 | 3.9833  | 3.875  | 5.4578   | 4.2167  | 9.5953  | 16.7727  | 0.1816 | 1.3985 |
| 4/19/2019 9:21 | 3.75    | 3.9583 | 5.404    | 3.2     | 9.63    | 15.4333  | 0.1743 | 1.4388 |
| 4/19/2019 9:22 | 3.5083  | 3.6167 | 5.0502   | 3.4333  | 9.6513  | 14.3417  | 0.1834 | 1.4613 |
| 4/19/2019 9:23 | 3.2667  | 3.9833 | 5.455    | 3.0833  | 9.6892  | 13.1273  | 0.1742 | 1.4688 |
| 4/19/2019 9:24 | 3.0818  | 3.5667 | 5.0498   | 3.4167  | 9.702   | 11.7818  | 0.1737 | 1.5198 |
| 4/19/2019 9:25 | 2.9     | 3.3167 | 5.1288   | 2.5667  | 9.6708  | 10.4909  | 0.1931 | 1.5171 |
| 4/19/2019 9:26 | 2.775   | 3.1917 | 4.9295   | 2.1667  | 9.6988  | 9.7545   | 0.1719 | 1.4971 |
| 4/19/2019 9:27 | 2.7     | 2.75   | 5.3108   | 2.8     | 9.7173  | 9.33     | 0.1817 | 1.5239 |
| 4/19/2019 9:28 | 2.6167  | 2.45   | 4.9953   | 2.0167  | 9.6908  | 8.3917   | 0.1853 | 1.5498 |
| 4/19/2019 9:29 | 2.575   | 1.9333 | 4.7188   | 1.8833  | 9.6881  | 7.34     | 0.1787 | 1.5834 |
| 4/19/2019 9:30 | 2.4667  | 2.1417 | 4.6855   | 1.7333  | 9.6366  | 6.9833   | 0.1892 | 1.583  |
| 4/19/2019 9:31 | 2.3333  | 2.3917 | 4.6717   | 2.5333  | 9.8926  | 7.19     | 0.1948 | 1.6203 |
| 4/19/2019 9:32 | 2.0583  | 1.8417 | 4.6218   | 1.5833  | 12.9564 | 8.4455   | 0.2306 | 1.685  |
| 4/19/2019 9:33 | 1.6417  | 1.2083 | 7.8423   | 1.1167  | 19.7528 | 33.7667  | 0.4454 | 1.7672 |
| 4/19/2019 9:34 | 1.0833  | 3.4083 | 48.8983  | 11.8    | 36.6443 | 64.56    | 1.1831 | 1.9851 |
| 4/19/2019 9:35 | 0.525   | 0.9417 | 66.8417  | 11.8667 | 42.5527 | 87.7917  | 1.6033 | 2.2073 |
| 4/19/2019 9:36 | 0.175   | 1.1    | 58.675   | 9.3     | 42.2381 | 89.2182  | 1.5173 | 2.2703 |
| 4/19/2019 9:37 | 0.025   | 3.1667 | 85.1833  | 13.7167 | 45.8639 | 107.0833 | 1.9867 | 2.6604 |
| 4/19/2019 9:38 | 0       | 0.8167 | 136.1167 | 22.0167 | 51.4184 | 158.3    | 4.2579 | 2.6089 |
| 4/19/2019 9:39 | -0.0667 | 1.3917 | 124.2333 | 18.15   | 49.6476 | 142.4    | 4.4733 | 2.5702 |
| 4/19/2019 9:40 | -0.0583 | 2.5417 | 126.1333 | 17.6167 | 48.967  | 145.28   | 3.9071 | 2.594  |
| 4/19/2019 9:41 | 0       | 2.0917 | 123.4833 | 17.4167 | 47.1376 | 155.7818 | 4.1474 | 2.6313 |

|                 |        |        |          |         |         |          |        |        |
|-----------------|--------|--------|----------|---------|---------|----------|--------|--------|
| 4/19/2019 9:42  | 0.0083 | 1.6917 | 121.4667 | 16.5667 | 46.1563 | 160.89   | 4.592  | 2.657  |
| 4/19/2019 9:43  | 0      | 1.7833 | 118.1    | 16.3167 | 45.1604 | 175.7167 | 4.5455 | 2.699  |
| 4/19/2019 9:44  | 0.05   | 1.8083 | 117.3667 | 16.0333 | 44.9156 | 189.8364 | 5.0766 | 2.6829 |
| 4/19/2019 9:45  | 0.075  | 1.975  | 114.1667 | 15.9333 | 43.9293 | 182.35   | 4.3792 | 2.6647 |
| 4/19/2019 9:46  | 0.1    | 1.875  | 113.8833 | 15.75   | 44.0245 | 186.7182 | 4.9768 | 2.6244 |
| 4/19/2019 9:47  | 0.0167 | 2.2    | 109.5667 | 15.25   | 42.843  | 186.7455 | 4.1804 | 2.6438 |
| 4/19/2019 9:48  | 0      | 1.4583 | 108.4167 | 15.4333 | 42.5368 | 182.7273 | 4.6915 | 2.6673 |
| 4/19/2019 9:49  | 0      | 1.2667 | 105.3833 | 15.1667 | 41.5604 | 176.7333 | 4.2781 | 2.6319 |
| 4/19/2019 9:50  | 0      | 2.125  | 102.2    | 15.1167 | 40.6443 | 174.8333 | 3.8128 | 2.6279 |
| 4/19/2019 9:51  | 0      | 2.1583 | 100.6167 | 14.7167 | 40.1484 | 174.0833 | 3.8459 | 2.6263 |
| 4/19/2019 9:52  | 0      | 1.9833 | 99.4183  | 14.7    | 39.6995 | 173.2455 | 3.9258 | 2.6067 |
| 4/19/2019 9:53  | 0.0917 | 1.7    | 97.925   | 14.0167 | 39.3162 | 172.36   | 3.8619 | 2.6278 |
| 4/19/2019 9:54  | 0.0818 | 1.0667 | 93.755   | 14.15   | 38.1484 | 171.06   | 3.5853 | 2.6383 |
| 4/19/2019 9:55  | 0.0417 | 1.9083 | 93.4667  | 14.1333 | 37.8753 | 169.4417 | 3.5496 | 2.6023 |
| 4/19/2019 9:56  | 0.0083 | 1.5167 | 91.8017  | 13.8167 | 37.481  | 167.7    | 3.564  | 2.5914 |
| 4/19/2019 9:57  | 0.0833 | 1.8167 | 90.2517  | 13.55   | 36.9073 | 165.4636 | 3.4638 | 2.612  |
| 4/19/2019 9:58  | 0.1    | 0.6417 | 88.0317  | 13.3    | 36.1867 | 163.23   | 3.459  | 2.6035 |
| 4/19/2019 9:59  | 0.1    | 1.2667 | 87.8783  | 13.3667 | 35.8549 | 161.0091 | 3.4951 | 2.5892 |
| 4/19/2019 10:00 | 0.1    | 1.3167 | 85.7883  | 13.1    | 35.3293 | 158.67   | 3.3359 | 2.5687 |
| 4/19/2019 10:01 | 0.1    | 1.375  | 84.7667  | 12.95   | 34.8431 | 156.0364 | 3.2904 | 2.5884 |
| 4/19/2019 10:02 | 0.15   | 1.3    | 82.4742  | 12.4    | 33.8484 | 153.1778 | 3.2051 | 2.5891 |
| 4/19/2019 10:03 | 0.1083 | 1.2167 | 82.0525  | 12.0667 | 33.8006 | 151      | 3.1999 | 2.5684 |
| 4/19/2019 10:04 | 0.1417 | 1.6167 | 75.5267  | 12      | 33.0039 | 148.8    | 3.1304 | 2.5778 |
| 4/19/2019 10:05 | 0.2    | 1.8    | 78.9008  | 12.6833 | 32.6159 | 146.4    | 3.1259 | 2.5903 |
| 4/19/2019 10:06 | 0.2    | 1.4    | 77.0283  | 12.4833 | 31.9896 | 143.4583 | 3.0806 | 2.576  |
| 4/19/2019 10:07 | 0.2    | 1.6    | 76.0833  | 12.0167 | 31.5798 | 140.7273 | 3.0728 | 2.5563 |
| 4/19/2019 10:08 | 0.2083 | 1.675  | 74.9967  | 12.0333 | 31.1768 | 139.0091 | 3.0448 | 2.546  |
| 4/19/2019 10:09 | 0.2083 | 1.5417 | 74.4517  | 11.8333 | 30.8128 | 137.4182 | 3.0198 | 2.5493 |
| 4/19/2019 10:10 | 0.2    | 1.6667 | 72.91    | 11.5667 | 30.2311 | 135.8083 | 3.0048 | 2.6041 |
| 4/19/2019 10:11 | 0.2083 | 0.8917 | 72.6017  | 11.3167 | 30.1879 | 134.44   | 2.9931 | 2.5368 |
| 4/19/2019 10:12 | 0.2667 | 1.2083 | 71.4617  | 11.55   | 29.6747 | 133.1364 | 2.9648 | 2.5191 |
| 4/19/2019 10:13 | 0.3    | 1.875  | 69.3767  | 11.4833 | 28.9686 | 131.55   | 2.9258 | 2.5684 |
| 4/19/2019 10:14 | 0.3    | 1.5167 | 68.6258  | 11.1833 | 28.5946 | 130.3364 | 2.8891 | 2.5823 |
| 4/19/2019 10:15 | 0.2917 | 1.7167 | 67.78    | 10.6833 | 28.4298 | 128.7636 | 2.8902 | 2.5263 |
| 4/19/2019 10:16 | 0.2583 | 1.3833 | 67.0942  | 10.5167 | 27.8693 | 127.3364 | 2.8608 | 2.5066 |
| 4/19/2019 10:17 | 0.1833 | 1.1833 | 65.9675  | 10.0833 | 27.4882 | 126.32   | 2.8318 | 2.5139 |
| 4/19/2019 10:18 | 0.1    | 1.5083 | 62.4067  | 9.7833  | 27.463  | 125.69   | 2.8244 | 2.5093 |
| 4/19/2019 10:19 | 0.1    | 1.275  | 63.4558  | 10.4333 | 27.217  | 125.54   | 2.7953 | 2.516  |
| 4/19/2019 10:20 | 0.1083 | 1.675  | 63.5958  | 10.4667 | 26.4036 | 123.72   | 2.7795 | 2.5235 |
| 4/19/2019 10:21 | 0.1833 | 1.1667 | 63.1308  | 10.35   | 26.0902 | 122.125  | 2.778  | 2.5365 |
| 4/19/2019 10:22 | 0.1917 | 1.5083 | 61.6733  | 10.6667 | 25.6033 | 121.23   | 2.7394 | 2.5433 |
| 4/19/2019 10:23 | 0.1583 | 1.075  | 60.315   | 9.65    | 25.3177 | 120.0333 | 2.7255 | 2.5221 |
| 4/19/2019 10:24 | 0.1091 | 0.175  | 60.2517  | 9.5667  | 25.0288 | 118.9182 | 2.6991 | 2.5111 |
| 4/19/2019 10:25 | 0.1    | 1.15   | 55.6542  | 9.1833  | 24.5596 | 117.7909 | 2.6673 | 2.5256 |
| 4/19/2019 10:26 | 0.0333 | 0.575  | 58.4825  | 9.7333  | 24.4533 | 116.7556 | 2.6726 | 2.4984 |
| 4/19/2019 10:27 | 0.0333 | 1.7667 | 57.9492  | 9.25    | 23.9487 | 116.03   | 2.6298 | 2.4957 |
| 4/19/2019 10:28 | 0.05   | 1.1833 | 57.81    | 9.2167  | 23.8105 | 115.29   | 2.6321 | 2.5015 |

|                 |        |         |         |        |         |          |        |        |
|-----------------|--------|---------|---------|--------|---------|----------|--------|--------|
| 4/19/2019 10:29 | 0.0917 | 1.2667  | 56.8108 | 9.8667 | 23.4711 | 114.3636 | 2.6144 | 2.4793 |
| 4/19/2019 10:30 | 0.1    | 1.7667  | 56.2133 | 9.4833 | 23.2568 | 113.3818 | 2.5919 | 2.4608 |
| 4/19/2019 10:31 | 0.1    | 0.8333  | 55.235  | 9.4167 | 22.8861 | 112.49   | 2.5804 | 2.4557 |
| 4/19/2019 10:32 | 0.1    | 1.55    | 54.64   | 8.8167 | 22.5681 | 112.4889 | 2.552  | 2.4746 |
| 4/19/2019 10:33 | 0.1    | 0.925   | 54.1092 | 8.4333 | 22.289  | 112.2727 | 2.5336 | 2.4615 |
| 4/19/2019 10:34 | 0.1    | 1.1417  | 52.9033 | 8.6    | 21.925  | 110.9    | 2.5198 | 2.4523 |
| 4/19/2019 10:35 | 0.1    | 1.125   | 52.8833 | 8.45   | 21.7307 | 109.6727 | 2.4793 | 2.4403 |
| 4/19/2019 10:36 | 0.1    | 1.0417  | 52.0358 | 8.35   | 21.3688 | 108.7909 | 2.4841 | 2.4483 |
| 4/19/2019 10:37 | 0.1    | 0.825   | 51.4492 | 8.3333 | 21.128  | 108.0455 | 2.4586 | 2.5003 |
| 4/19/2019 10:38 | 0.1    | 0.5417  | 51.1183 | 8.65   | 20.9093 | 107.3364 | 2.4458 | 2.4718 |
| 4/19/2019 10:39 | 0.1    | 0.975   | 49.9842 | 8.0167 | 20.5686 | 106.4417 | 2.4332 | 2.4472 |
| 4/19/2019 10:40 | 0.1    | 1.2083  | 49.4325 | 8.1167 | 20.3651 | 105.43   | 2.3967 | 2.4495 |
| 4/19/2019 10:41 | 0.15   | 0.9583  | 48.7367 | 8.4167 | 20.0403 | 104.6364 | 2.3939 | 2.4888 |
| 4/19/2019 10:42 | 0.15   | 0.825   | 48.3717 | 7.8667 | 19.8295 | 103.8    | 2.3736 | 2.4632 |
| 4/19/2019 10:43 | 0.2    | 0.8583  | 47.725  | 7.8833 | 19.5623 | 103.1091 | 2.3528 | 2.4342 |
| 4/19/2019 10:44 | 0.2    | 0.9     | 47.0333 | 8      | 19.3298 | 102.3    | 2.3469 | 2.4578 |
| 4/19/2019 10:45 | 0.2    | 1.3     | 46.895  | 7.25   | 19.0609 | 101.4167 | 2.3139 | 2.4433 |
| 4/19/2019 10:46 | 0.2    | 0.575   | 46.5608 | 6.9333 | 18.8452 | 100.9778 | 2.3078 | 2.4185 |
| 4/19/2019 10:47 | 0.1917 | 0.5583  | 45.705  | 7.4667 | 18.6426 | 100.6833 | 2.3002 | 2.4244 |
| 4/19/2019 10:48 | 0.1667 | 1.0417  | 45.2992 | 6.7833 | 18.4723 | 99.8273  | 2.2752 | 2.4093 |
| 4/19/2019 10:49 | 0.2    | 1.1833  | 45.0967 | 6.9167 | 18.2959 | 98.7667  | 2.2761 | 2.4008 |
| 4/19/2019 10:50 | 0.1667 | 0.5083  | 44.2508 | 6.55   | 17.9596 | 97.7583  | 2.2461 | 2.3981 |
| 4/19/2019 10:51 | 0.1083 | 0.4417  | 43.5467 | 6.4667 | 17.7288 | 97.23    | 2.2357 | 2.4221 |
| 4/19/2019 10:52 | 0.1    | 0.3417  | 42.425  | 7      | 17.5894 | 96.95    | 2.2225 | 2.4407 |
| 4/19/2019 10:53 | 0.1167 | 0.8083  | 42.015  | 7.1667 | 17.2983 | 96.1909  | 2.1796 | 2.4283 |
| 4/19/2019 10:54 | 0.1917 | 0.1667  | 41.9225 | 7.1833 | 17.0864 | 95.475   | 2.1855 | 2.4341 |
| 4/19/2019 10:55 | 0.1667 | 0.875   | 40.3667 | 6.9    | 16.7077 | 94.61    | 2.1297 | 2.4123 |
| 4/19/2019 10:56 | 0.1833 | -0.1917 | 40.235  | 6.8167 | 16.5347 | 93.3273  | 2.1128 | 2.3999 |
| 4/19/2019 10:57 | 0.2    | 0.2833  | 39.2633 | 6.35   | 16.1893 | 92.54    | 2.1004 | 2.434  |
| 4/19/2019 10:58 | 0.2    | 1.4833  | 37.5575 | 5.8333 | 15.7003 | 91.6455  | 2.0322 | 2.4033 |
| 4/19/2019 10:59 | 0.2    | 0.7167  | 37.6158 | 6.3667 | 15.6647 | 90.8556  | 2.0416 | 2.3506 |
| 4/19/2019 11:00 | 0.1    | 0.6417  | 36.5242 | 5.9167 | 15.3903 | 90.1636  | 2.0017 | 2.3388 |
| 4/19/2019 11:01 | 0.1    | 0.5917  | 34.5383 | 5.7    | 14.8364 | 89.3     | 1.9047 | 2.3372 |
| 4/19/2019 11:02 | 0.1    | 0.35    | 34.6042 | 6.15   | 14.8032 | 88.4818  | 1.9299 | 2.2823 |
| 4/19/2019 11:03 | 0.1    | 0.025   | 32.8883 | 5.6333 | 14.4265 | 87.4     | 1.855  | 2.3139 |
| 4/19/2019 11:04 | 0.1    | 0.4667  | 33.8325 | 5.85   | 14.4734 | 86.1727  | 1.9048 | 2.2882 |
| 4/19/2019 11:05 | 0.0583 | 1.15    | 32.2333 | 5.35   | 14.0331 | 85.1091  | 1.8503 | 2.2618 |
| 4/19/2019 11:06 | 0      | 0.625   | 31.4217 | 5.2    | 13.7717 | 83.9364  | 1.7949 | 2.2601 |
| 4/19/2019 11:07 | 0      | 0.8083  | 31.2792 | 5.4833 | 13.7411 | 82.89    | 1.8119 | 2.245  |
| 4/19/2019 11:08 | 0      | 0.4667  | 31.13   | 4.8833 | 13.7298 | 82.5182  | 1.7867 | 2.2033 |
| 4/19/2019 11:09 | -0.025 | 0.2417  | 30.6742 | 4.0833 | 13.6992 | 81.72    | 1.7542 | 2.1824 |
| 4/19/2019 11:10 | -0.1   | 0.175   | 28.85   | 4.95   | 13.3957 | 80.8818  | 1.7044 | 2.152  |
| 4/19/2019 11:11 | -0.05  | 0.3167  | 28.2067 | 4.15   | 13.4378 | 79.73    | 1.653  | 2.1533 |
| 4/19/2019 11:12 | 0      | 0.5417  | 26.0558 | 4.1167 | 13.3913 | 78.5182  | 1.5642 | 2.1634 |
| 4/19/2019 11:13 | 0.0917 | 0.075   | 24.1975 | 3.7667 | 13.3486 | 76.4636  | 1.4803 | 2.138  |
| 4/19/2019 11:14 | 0.1    | 0.3667  | 22.5758 | 3.2    | 13.4001 | 75.14    | 1.4182 | 2.0968 |
| 4/19/2019 11:15 | 0.1    | 0.6333  | 22.1575 | 3.7167 | 13.8583 | 73.8     | 1.3992 | 2.0708 |

|                 |        |        |         |        |         |         |        |        |
|-----------------|--------|--------|---------|--------|---------|---------|--------|--------|
| 4/19/2019 11:16 | 0.2    | 0.5    | 21.375  | 3.55   | 14.161  | 72.4455 | 1.3297 | 2.0192 |
| 4/19/2019 11:17 | 0.2    | 0.3667 | 19.76   | 3.4167 | 14.1673 | 70.8833 | 1.2682 | 1.9751 |
| 4/19/2019 11:18 | 0.2    | 0.8    | 19.2183 | 3.7167 | 14.3334 | 69.2    | 1.2405 | 1.9821 |
| 4/19/2019 11:19 | 0.1583 | 0.7333 | 16.9358 | 3.3333 | 14.359  | 67.3833 | 1.1488 | 1.9668 |
| 4/19/2019 11:20 | 0.1    | 0.3833 | 16.9417 | 2.25   | 14.3235 | 65.46   | 1.1173 | 1.9102 |
| 4/19/2019 11:21 | 0.1    | 0.2333 | 15.9925 | 2.8667 | 14.0973 | 63.6    | 1.0642 | 1.8817 |
| 4/19/2019 11:22 | 0.1    | -0.2   | 15.4858 | 2.2833 | 13.2035 | 61.43   | 0.9684 | 1.8726 |
| 4/19/2019 11:23 | 0.1    | 0.5083 | 14.1793 | 2.8833 | 13.9983 | 59.3273 | 1.0006 | 1.8798 |
| 4/19/2019 11:24 | 0.1833 | 0.3583 | 11.4552 | 2.7    | 13.713  | 57.5727 | 0.9345 | 1.8691 |
| 4/19/2019 11:25 | 0.2    | 0.9083 | 13.39   | 3.2667 | 13.8503 | 56.43   | 0.9152 | 1.8388 |
| 4/19/2019 11:26 | 0.2417 | 1.175  | 12.5492 | 2.6167 | 13.7993 | 55.0727 | 0.885  | 1.8193 |
| 4/19/2019 11:27 | 0.3    | 1.0167 | 12.22   | 2.5167 | 13.5412 | 53.4818 | 0.8329 | 1.8073 |
| 4/19/2019 11:28 | 0.3417 | 1.5083 | 12.0483 | 2.7167 | 13.832  | 51.8417 | 0.8447 | 1.7879 |
| 4/19/2019 11:29 | 0.4167 | 0.6583 | 11.0592 | 2.2167 | 13.0226 | 50.3364 | 0.7671 | 1.7647 |
| 4/19/2019 11:30 | 0.55   | 1.5583 | 11.115  | 2.6333 | 13.3509 | 48.9455 | 0.768  | 1.7688 |
| 4/19/2019 11:31 | 0.6917 | 1.05   | 10.9025 | 2.5833 | 13.0896 | 47.8182 | 0.7329 | 1.7478 |
| 4/19/2019 11:32 | 0.775  | 1.55   | 10.3693 | 2.05   | 12.6578 | 46.42   | 0.6809 | 1.7443 |
| 4/19/2019 11:33 | 0.875  | 1.6417 | 10.4987 | 2.1333 | 13.0058 | 44.8    | 0.6931 | 1.704  |
| 4/19/2019 11:34 | 0.9583 | 1.575  | 10.1597 | 2.7667 | 12.4484 | 43.7727 | 0.6427 | 1.6989 |
| 4/19/2019 11:35 | 1.05   | 1.625  | 9.6445  | 2.55   | 12.3643 | 42.4818 | 0.6229 | 1.6871 |
| 4/19/2019 11:36 | 1.1583 | 1.6417 | 9.7067  | 2.6333 | 12.0602 | 41.37   | 0.6122 | 1.6918 |
| 4/19/2019 11:37 | 1.2667 | 1.7    | 9.4277  | 2.5333 | 11.7388 | 40.4636 | 0.5718 | 1.6545 |
| 4/19/2019 11:38 | 1.3583 | 1.6417 | 8.9957  | 2.6    | 11.0009 | 39.53   | 0.5443 | 1.6403 |
| 4/19/2019 11:39 | 1.4583 | 1.7417 | 9.1643  | 2.3833 | 10.9618 | 38.6364 | 0.5363 | 1.6468 |
| 4/19/2019 11:40 | 1.5833 | 2.4667 | 8.683   | 2.2667 | 10.6313 | 37.68   | 0.5147 | 1.6442 |
| 4/19/2019 11:41 | 1.6667 | 2.225  | 8.6995  | 2.6833 | 10.1128 | 36.7667 | 0.493  | 1.6323 |
| 4/19/2019 11:42 | 1.825  | 2.6    | 8.8262  | 2.95   | 10.2304 | 35.99   | 0.4788 | 1.6392 |
| 4/19/2019 11:43 | 1.9083 | 2.8    | 8.1157  | 3.3333 | 9.6274  | 35.2182 | 0.4676 | 1.6177 |
| 4/19/2019 11:44 | 2      | 2.4583 | 0.7838  | 2.55   | 9.1454  | 34.43   | 0.4422 | 1.6104 |
| 4/19/2019 11:45 | 2.025  | 3.3917 | 8.2502  | 3.2833 | 9.0443  | 34.1    | 0.4335 | 1.6233 |
| 4/19/2019 11:46 | 2.1    | 3.1167 | 8.3323  | 2.7667 | 8.7463  | 33.4111 | 0.4278 | 1.6283 |
| 4/19/2019 11:47 | 2.2    | 3.3167 | 8.6005  | 3.4833 | 8.6521  | 32.9364 | 0.4128 | 1.6117 |
| 4/19/2019 11:48 | 2.3    | 2.825  | 8.3442  | 3.3667 | 8.1988  | 32.52   | 0.4035 | 1.5788 |
| 4/19/2019 11:49 | 2.425  | 3.0167 | 8.3338  | 3.6667 | 8.0351  | 31.8909 | 0.3946 | 1.5698 |
| 4/19/2019 11:50 | 2.5583 | 3.3417 | 8.2978  | 3.9833 | 7.6299  | 31.3444 | 0.3646 | 1.5772 |
| 4/19/2019 11:51 | 2.7583 | 3.2333 | 8.6552  | 4.3    | 7.4965  | 30.9273 | 0.3772 | 1.5766 |
| 4/19/2019 11:52 | 2.875  | 3.5917 | 8.5157  | 4.3667 | 7.1232  | 30.47   | 0.3391 | 1.5486 |
| 4/19/2019 11:53 | 3      | 3.9    | 8.4542  | 4.05   | 6.8523  | 30.0636 | 0.3402 | 1.5418 |
| 4/19/2019 11:54 | 3.1167 | 4.5917 | 8.8368  | 4.2833 | 6.8903  | 29.54   | 0.3477 | 1.5301 |
| 4/19/2019 11:55 | 3.275  | 5.0833 | 9.4695  | 5.0667 | 6.821   | 29.2273 | 0.3362 | 1.5535 |
| 4/19/2019 11:56 | 3.4833 | 5.075  | 8.9853  | 4.3833 | 6.5108  | 28.98   | 0.3311 | 1.5784 |
| 4/19/2019 11:57 | 3.675  | 5.3417 | 9.3252  | 5.4333 | 6.3708  | 28.7364 | 0.3101 | 1.5885 |
| 4/19/2019 11:58 | 3.875  | 4.9    | 9.462   | 5.2    | 6.2588  | 28.4091 | 0.3117 | 1.571  |
| 4/19/2019 11:59 | 4.0333 | 5.0083 | 9.403   | 5.5333 | 6.1087  | 28.06   | 0.3054 | 1.55   |
| 4/19/2019 12:00 | 4.1    | 4.5417 | 9.0307  | 4.9333 | 5.8358  | 27.82   | 0.2795 | 1.5613 |
| 4/19/2019 12:01 | 4.1    | 4.7417 | 8.7173  | 4.6333 | 5.7816  | 27.5091 | 0.2919 | 1.5293 |
| 4/19/2019 12:02 | 4.1    | 5.9083 | 8.7835  | 4.8833 | 5.7555  | 27.3    | 0.2769 | 1.4988 |



4/19/2019 12:50  
4/19/2019 12:51  
4/19/2019 12:52  
4/19/2019 12:53  
4/19/2019 12:54  
4/19/2019 12:55  
4/19/2019 12:56  
4/19/2019 12:57  
4/19/2019 12:58  
4/19/2019 12:59  
4/19/2019 13:00  
4/19/2019 13:01  
4/19/2019 13:02  
4/19/2019 13:03  
4/19/2019 13:04  
4/19/2019 13:05  
4/19/2019 13:06  
4/19/2019 13:07  
4/19/2019 13:08  
4/19/2019 13:09  
4/19/2019 13:10  
4/19/2019 13:11  
4/19/2019 13:12  
4/19/2019 13:13  
4/19/2019 13:14  
4/19/2019 13:15  
4/19/2019 13:16  
4/19/2019 13:17  
4/19/2019 13:18  
4/19/2019 13:19  
4/19/2019 13:20  
4/19/2019 13:21  
4/19/2019 13:22  
4/19/2019 13:23  
4/19/2019 13:24  
4/19/2019 13:25  
4/19/2019 13:26  
4/19/2019 13:27  
4/19/2019 13:28  
4/19/2019 13:29  
4/19/2019 13:30  
4/19/2019 13:31  
4/19/2019 13:32  
4/19/2019 13:33  
4/19/2019 13:34  
4/19/2019 13:35  
4/19/2019 13:36

|                 |        |          |         |         |
|-----------------|--------|----------|---------|---------|
| 4/19/2019 13:37 |        |          |         |         |
| 4/19/2019 13:38 |        |          |         |         |
| 4/19/2019 13:39 |        |          |         |         |
| 4/19/2019 13:40 |        |          |         |         |
| 4/19/2019 13:41 |        |          |         |         |
| 4/19/2019 13:42 |        |          |         |         |
| 4/19/2019 13:43 | 3.4958 | 217.86   | 0.1048  | -0.9474 |
| 4/19/2019 13:44 | 3.7839 | 217.45   | 0.0803  | -0.9474 |
| 4/19/2019 13:45 | 4.3859 | 215.825  | 0.0275  | -0.9474 |
| 4/19/2019 13:46 | 4.2029 | 193.88   | -0.014  | -0.9474 |
| 4/19/2019 13:47 | 4.4991 | 160.7455 | -0.0157 | -0.9474 |
| 4/19/2019 13:48 | 4.8341 | 140.71   | -0.0143 | -0.9474 |
| 4/19/2019 13:49 | 4.8922 | 122.3364 | 0.0383  | -0.9474 |
| 4/19/2019 13:50 | 4.8413 | 105.5889 | 0.072   | -0.9474 |
| 4/19/2019 13:51 | 4.7456 | 90.5     | 0.1225  | -0.9474 |
| 4/19/2019 13:52 | 4.5997 | 77.9667  | 0.1622  | -0.9474 |
| 4/19/2019 13:53 | 4.4684 | 67.225   | 0.1809  | -0.9474 |
| 4/19/2019 13:54 | 4.3233 | 58.5818  | 0.2123  | -0.9474 |
| 4/19/2019 13:55 | 4.1562 | 50.3182  | 0.2352  | -0.9474 |
| 4/19/2019 13:56 | 4.0794 | 44.35    | 0.2439  | -0.9474 |
| 4/19/2019 13:57 | 4.0779 | 38.8417  | 0.2644  | -0.9474 |
| 4/19/2019 13:58 | 4.2224 | 34.175   | 0.2769  | -0.9474 |
| 4/19/2019 13:59 | 4.3493 | 32.9091  | 0.2718  | -0.9474 |
| 4/19/2019 14:00 | 4.4759 | 32.2556  | 0.2928  | -0.9474 |
| 4/19/2019 14:01 | 4.487  | 31.68    | 0.2876  | -0.9474 |
| 4/19/2019 14:02 |        |          |         | -0.9474 |
| 4/19/2019 14:03 |        |          |         | -0.9474 |
| 4/19/2019 14:04 |        |          |         | -0.9474 |
| 4/19/2019 14:05 |        |          |         | -0.9474 |
| 4/19/2019 14:06 |        |          |         | -0.9474 |
| 4/19/2019 14:07 |        |          |         | -0.9474 |
| 4/19/2019 14:08 |        |          |         | -0.9474 |
| 4/19/2019 14:09 |        |          |         | -0.9474 |
| 4/19/2019 14:10 |        |          |         | -0.9474 |
| 4/19/2019 14:11 |        |          |         | 2.2812  |
| 4/19/2019 14:12 |        |          |         | 4.9658  |
| 4/19/2019 14:13 |        |          |         | 5.1653  |
| 4/19/2019 14:14 |        |          |         | 5.1883  |
| 4/19/2019 14:15 |        |          |         | 4.6255  |
| 4/19/2019 14:16 |        |          |         | 2.9514  |
| 4/19/2019 14:17 |        |          |         | 2.082   |
| 4/19/2019 14:18 |        |          |         | 1.8998  |
| 4/19/2019 14:19 |        |          |         | 2.2381  |
| 4/19/2019 14:20 |        |          |         | 1.7579  |
| 4/19/2019 14:21 |        |          |         | 1.7059  |
| 4/19/2019 14:22 |        |          |         | 1.6033  |
| 4/19/2019 14:23 |        |          |         | 1.649   |

|                 |        |
|-----------------|--------|
| 4/19/2019 14:24 | 1.611  |
| 4/19/2019 14:25 | 1.6457 |
| 4/19/2019 14:26 | 1.6456 |
| 4/19/2019 14:27 | 1.6553 |
| 4/19/2019 14:28 | 1.6578 |
| 4/19/2019 14:29 | 1.6323 |
| 4/19/2019 14:30 | 1.6128 |
| 4/19/2019 14:31 | 1.638  |
| 4/19/2019 14:32 | 1.6376 |
| 4/19/2019 14:33 | 1.6388 |
| 4/19/2019 14:34 | 1.6068 |
| 4/19/2019 14:35 | 1.5991 |
| 4/19/2019 14:36 | 1.6047 |
| 4/19/2019 14:37 | 1.6257 |
| 4/19/2019 14:38 | 1.619  |
| 4/19/2019 14:39 | 1.6158 |
| 4/19/2019 14:40 | 1.6568 |
| 4/19/2019 14:41 | 1.6395 |
| 4/19/2019 14:42 | 1.6428 |
| 4/19/2019 14:43 | 1.6521 |
| 4/19/2019 14:44 | 1.6392 |
| 4/19/2019 14:45 | 1.6254 |
| 4/19/2019 14:46 | 1.6482 |
| 4/19/2019 14:47 | 1.6679 |
| 4/19/2019 14:48 | 1.6535 |
| 4/19/2019 14:49 | 1.6252 |
| 4/19/2019 14:50 | 1.6238 |
| 4/19/2019 14:51 | 1.6388 |
| 4/19/2019 14:52 | 1.632  |
| 4/19/2019 14:53 | 1.6256 |
| 4/19/2019 14:54 | 1.6217 |
| 4/19/2019 14:55 | 1.6323 |
| 4/19/2019 14:56 | 1.6562 |
| 4/19/2019 14:57 | 1.6248 |
| 4/19/2019 14:58 | 1.632  |
| 4/19/2019 14:59 | 1.6208 |
| 4/19/2019 15:00 | 1.6239 |
| 4/19/2019 15:01 | 1.6375 |
| 4/19/2019 15:02 | 1.6366 |
| 4/19/2019 15:03 | 1.6182 |
| 4/19/2019 15:04 | 1.5888 |
| 4/19/2019 15:05 | 1.5801 |
| 4/19/2019 15:06 | 1.6024 |
| 4/19/2019 15:07 | 1.6155 |
| 4/19/2019 15:08 | 1.6049 |
| 4/19/2019 15:09 | 1.5997 |
| 4/19/2019 15:10 | 1.6181 |



|                 |        |
|-----------------|--------|
| 4/19/2019 15:11 | 1.639  |
| 4/19/2019 15:12 | 1.658  |
| 4/19/2019 15:13 | 1.643  |
| 4/19/2019 15:14 | 1.6303 |
| 4/19/2019 15:15 | 1.605  |
| 4/19/2019 15:16 | 1.6023 |
| 4/19/2019 15:17 | 1.6273 |
| 4/19/2019 15:18 | 1.6162 |
| 4/19/2019 15:19 | 1.613  |
| 4/19/2019 15:20 | 1.5981 |
| 4/19/2019 15:21 | 1.6237 |
| 4/19/2019 15:22 | 1.6271 |
| 4/19/2019 15:23 | 1.6157 |
| 4/19/2019 15:24 | 1.6268 |
| 4/19/2019 15:25 | 1.6293 |
| 4/19/2019 15:26 | 1.6264 |
| 4/19/2019 15:27 | 1.6362 |
| 4/19/2019 15:28 | 1.6422 |
| 4/19/2019 15:29 | 1.6638 |
| 4/19/2019 15:30 | 1.6486 |
| 4/19/2019 15:31 | 1.6611 |
| 4/19/2019 15:32 | 1.6644 |
| 4/19/2019 15:33 | 1.6462 |
| 4/19/2019 15:34 | 1.6568 |
| 4/19/2019 15:35 | 1.6348 |
| 4/19/2019 15:36 | 1.6437 |
| 4/19/2019 15:37 | 1.6359 |
| 4/19/2019 15:38 | 1.633  |
| 4/19/2019 15:39 | 1.6421 |
| 4/19/2019 15:40 | 1.6668 |
| 4/19/2019 15:41 | 1.6407 |
| 4/19/2019 15:42 | 1.6388 |
| 4/19/2019 15:43 | 1.6304 |
| 4/19/2019 15:44 | 1.6546 |
| 4/19/2019 15:45 | 1.6575 |
| 4/19/2019 15:46 | 1.6133 |
| 4/19/2019 15:47 | 1.6192 |
| 4/19/2019 15:48 | 1.6388 |
| 4/19/2019 15:49 | 1.6283 |
| 4/19/2019 15:50 | 1.6028 |
| 4/19/2019 15:51 | 1.6551 |
| 4/19/2019 15:52 | 1.6499 |
| 4/19/2019 15:53 | 1.6439 |
| 4/19/2019 15:54 | 1.6528 |
| 4/19/2019 15:55 | 1.6428 |
| 4/19/2019 15:56 | 1.6516 |
| 4/19/2019 15:57 | 1.6577 |

|                 |        |         |        |           |        |         |         |        |
|-----------------|--------|---------|--------|-----------|--------|---------|---------|--------|
| 4/19/2019 15:58 | 1.8583 | -0.05   | 4.8564 | -0.4167   | 2.545  | 6.5917  | 0.2375  | 1.6708 |
| 4/19/2019 15:59 | 1.35   | 0.25    | 5.0758 | -0.3      | 2.5633 | 6.3091  | 0.2187  | 1.655  |
| 4/19/2019 16:00 | 1      | 0.6333  | 5.393  | 0.35      | 2.5904 | 6.1833  | 0.2204  | 1.6552 |
| 4/19/2019 16:01 | 1      | 0.3417  | 4.3798 | 0.05      | 2.612  | 6.3333  | 0.1986  | 1.6532 |
| 4/19/2019 16:02 | 1      | 0.45    | 4.4272 | -0.35     | 2.6626 | 7.65    | 0.2131  | 1.6311 |
| 4/19/2019 16:03 | 1      | 0.725   | 4.8252 | -0.3833   | 2.6584 | 14.45   | 0.1008  | 1.6487 |
| 4/19/2019 16:04 | 1      | -0.3    | 5.1393 | 0.15      | 2.668  | 14.4    | -0.0002 | 1.6488 |
| 4/19/2019 16:05 | 1      | 0.6083  | 4.4316 | 0         | 2.6879 | 12.8    | 0.0189  | 1.661  |
| 4/19/2019 16:06 | 1      | 0.3917  | 3.5953 | 0.05      | 2.9801 | 12.9909 | -0.0023 | 1.6545 |
| 4/19/2019 16:07 | 1      | -0.0083 | 5.0263 | -0.0333   | 3.0208 | 13.4889 | 0.0089  | 1.6438 |
| 4/19/2019 16:08 | 1.0417 | 0.3167  | 4.9415 | -0.0167   | 3.0403 | 13.6546 | 0.0038  | 1.6589 |
| 4/19/2019 16:09 | 1.0417 | 0.4083  | 4.5024 | 0.05      | 3.0684 | 13.3818 | 0.0015  | 1.632  |
| 4/19/2019 16:10 | 1.0667 | 0.5083  | 4.3768 | -0.3667   | 3.0696 | 13.15   | -0.001  | 1.6258 |
| 4/19/2019 16:11 | 1.1    | 0.2     | 4.9173 | 0.4       | 3.108  | 12.9222 | -0.0056 | 1.6382 |
| 4/19/2019 16:12 | 1.1917 | 0.1917  | 4.6179 | -0.1333   | 3.1016 | 12.6667 | 0.0802  | 1.6539 |
| 4/19/2019 16:13 | 1.2    | 0.6417  | 4.7312 | -0.1333   | 3.1413 | 12.4364 | 0.1206  | 1.6672 |
| 4/19/2019 16:14 | 1.1583 | 0.1083  | 5.0631 | -0.8167   | 3.1303 | 12.5    | 0.0038  | 1.6661 |
| 4/19/2019 16:15 | 1.125  | 0.1667  | 4.9335 | -0.0333   | 3.1509 | 12.5091 | 0.0062  | 1.6787 |
| 4/19/2019 16:16 | 1.1583 | 0.0417  | 4.7645 | -168.3333 | 3.1639 | 12.53   | -0.0053 | 1.6723 |
| 4/19/2019 16:17 | 1.1417 | 0.95    | 4.5123 | -0.3167   | 3.1613 | 12.71   | 0.0116  | 1.6711 |
| 4/19/2019 16:18 | 1.125  | 0.2583  | 4.1763 | 0.4167    | 3.211  | 13.57   | -0.0054 | 1.6796 |
| 4/19/2019 16:19 | 1.1    | 0.7583  | 4.9268 | 0.25      | 3.1993 | 13.6182 | 0.0025  | 1.6775 |
| 4/19/2019 16:20 | 1.1    | 0.4167  | 4.7417 | -0.05     | 3.2055 | 12.8909 | 0.003   | 1.6748 |
| 4/19/2019 16:21 | 1.1    | 0.5667  | 4.4023 | -0.4      | 3.1925 | 12.825  | -0.011  | 1.6796 |
| 4/19/2019 16:22 | 1.1167 | 0.2583  | 4.6443 | 0.2833    | 3.2114 | 13.22   | 0.0185  | 1.6488 |
| 4/19/2019 16:23 | 1.1917 | -0.125  | 4.3298 | 0.6167    | 3.2378 | 14      | -0.0095 | 1.6777 |
| 4/19/2019 16:24 | 1.2    | 1.0667  | 5.0148 | -0.1      | 3.2173 | 14.1727 | -0.0046 | 1.6643 |
| 4/19/2019 16:25 | 1.2    | 0.6083  | 5.1754 | -0.2      | 3.2401 | 14.3167 | -0.0031 | 1.6519 |
| 4/19/2019 16:26 | 1.2    | -0.35   | 4.0319 | -0.2833   | 3.2538 | 14.3417 | -0.0199 | 1.6863 |
| 4/19/2019 16:27 | 1.1667 | 0.3083  | 4.8634 | -0.05     | 3.2783 | 14.375  | -0.0008 | 1.7167 |
| 4/19/2019 16:28 | 1.1167 | 0.4     | 4.2257 | 0.1333    | 3.2863 | 14.4333 | -0.0099 | 1.6852 |
| 4/19/2019 16:29 | 1.1167 | 0.325   | 4.9378 | 0.0333    | 3.2973 | 14.45   | 0.0012  | 1.6921 |
| 4/19/2019 16:30 | 1.1    | 0.0583  | 4.6075 | -0.3      | 3.3015 | 13.5818 | -0.0066 | 1.6815 |
| 4/19/2019 16:31 | 1.125  | 0.2333  | 4.6493 | -0.0167   | 3.3268 | 13.1818 | -0.0142 | 1.6564 |
| 4/19/2019 16:32 | 1.1667 | 0.6333  | 5.2176 | -0.2      | 3.366  | 13.4833 | -0.0079 | 1.6614 |
| 4/19/2019 16:33 | 1.1583 | 0.3     | 5.1426 | -0.3167   | 3.3615 | 14.36   | 0.1332  | 1.6551 |
| 4/19/2019 16:34 | 1.1    | 0.3083  | 4.9934 | -0.0167   | 3.3949 | 15.25   | 0.1618  | 1.664  |
| 4/19/2019 16:35 | 1.0583 | 0.7917  | 5.0108 | -0.1333   | 3.3706 | 15.0546 | 0.1791  | 1.6801 |
| 4/19/2019 16:36 | 1      | -0.2    | 4.8267 | -0.1333   | 3.3896 | 15.2    | 0.1886  | 1.6698 |
| 4/19/2019 16:37 | 1      | 0.7083  | 4.7526 | 0.6333    | 3.3945 | 15.67   | 0.1914  | 1.6632 |
| 4/19/2019 16:38 | 1      | 0.1167  | 4.9292 | 0.6       | 3.4002 | 15.9455 | 0.1866  | 1.6614 |
| 4/19/2019 16:39 | 1.0167 | 1.05    | 5.1396 | 0.4167    | 3.4082 | 16.28   | 0.1944  | 1.6614 |
| 4/19/2019 16:40 | 1.025  | 0.375   | 4.8842 | -0.2      | 3.4043 | 17.06   | 0.1847  | 1.6632 |
| 4/19/2019 16:41 | 1.1    | 0.6667  | 4.7054 | 0.9167    | 3.4505 | 17.39   | 0.1835  | 1.6862 |
| 4/19/2019 16:42 | 1.1    | 0.0917  | 4.6628 | 0.2167    | 3.427  | 18.2    | 0.1918  | 1.6939 |
| 4/19/2019 16:43 | 1.1167 | -0.475  | 4.935  | -0.2667   | 3.4018 | 18.4909 | 0.1757  | 1.6723 |
| 4/19/2019 16:44 | 1.1    | 0.1667  | 4.79   | -0.25     | 3.429  | 18.7273 | 0.1897  | 1.6421 |

|                 |        |         |        |         |        |         |        |        |
|-----------------|--------|---------|--------|---------|--------|---------|--------|--------|
| 4/19/2019 16:45 | 1.1    | -0.1833 | 4.7631 | 0.2667  | 3.4318 | 18.8    | 0.1845 | 1.6681 |
| 4/19/2019 16:46 | 1.0833 | 0.0583  | 5.1503 | -0.2    | 3.4378 | 18.45   | 0.1773 | 1.6467 |
| 4/19/2019 16:47 | 1      | 0.475   | 4.8441 | 0.1167  | 3.4095 | 18.6273 | 0.1917 | 1.6558 |
| 4/19/2019 16:48 | 1      | -0.675  | 5.0546 | 0.2     | 3.4115 | 19.62   | 0.1824 | 1.6717 |
| 4/19/2019 16:49 | 1      | -0.1583 | 4.8208 | 0.2333  | 3.4252 | 20.0273 | 0.1871 | 1.6832 |
| 4/19/2019 16:50 | 1.0583 | 0.1     | 4.777  | -0.3333 | 3.4239 | 20.7    | 0.1812 | 1.6548 |
| 4/19/2019 16:51 | 1.1    | 0.225   | 4.679  | -0.0167 | 3.4218 | 20.8727 | 0.1758 | 1.6413 |
| 4/19/2019 16:52 | 1.1    | -0.5417 | 3.9568 | -0.5    | 3.4265 | 20.7333 | 0.185  | 1.6562 |
| 4/19/2019 16:53 | 1.1    | 0.575   | 4.9274 | 0.0333  | 3.4355 | 20.98   | 0.1611 | 1.6577 |
| 4/19/2019 16:54 | 1.0917 | 0.575   | 4.8479 | 0.3333  | 3.432  | 20.7667 | 0.1821 | 1.6414 |
| 4/19/2019 16:55 | 1.075  | -0.3    | 4.8157 | -0.0333 | 3.4149 | 20.2455 | 0.1738 | 1.6406 |
| 4/19/2019 16:56 | 1.0083 | -0.1083 | 4.8892 | 0.1167  | 3.4148 | 19.775  | 0.1723 | 1.6481 |
| 4/19/2019 16:57 | 1      | 0.3583  | 4.734  | -0.3167 | 3.4114 | 19.6    | 0.1762 | 1.6297 |
| 4/19/2019 16:58 | 1.0333 | 0.625   | 4.8021 | -0.3167 | 3.4305 | 19.3    | 0.1753 | 1.6168 |
| 4/19/2019 16:59 | 1.025  | 0.85    | 4.6707 | 0.6667  | 3.4083 | 18.86   | 0.1891 | 1.6401 |
| 4/19/2019 17:00 | 1      | -0.075  | 4.721  | 0.15    | 3.4008 | 18.1545 | 0.1745 | 1.6693 |
| 4/19/2019 17:01 | 0.9833 | -0.3333 | 4.6043 | 0.6     | 3.3768 | 17.86   | 0.1722 | 1.6888 |
| 4/19/2019 17:02 | 0.9333 | -0.05   | 4.4932 | 0.6667  | 3.369  | 17.4083 | 0.1806 | 1.6643 |
| 4/19/2019 17:03 | 0.9083 | 0.3833  | 4.7174 | 0.5333  | 3.3585 | 17.5546 | 0.1732 | 1.6851 |
| 4/19/2019 17:04 | 0.9    | -0.2    | 4.6993 | 0.4167  | 3.3449 | 18.1333 | 0.1812 | 1.718  |
| 4/19/2019 17:05 | 0.8083 | -0.1583 | 4.641  | -0.65   | 3.347  | 18.2364 | 0.1652 | 1.7196 |
| 4/19/2019 17:06 | 0.8    | 0       | 5.0075 | -0.1    | 3.35   | 18.1727 | 0.1667 | 1.6766 |
| 4/19/2019 17:07 | 0.8    | -0.1917 | 5.0807 | -0.4    | 3.4523 | 18.7917 | 0.1791 | 1.6768 |
| 4/19/2019 17:08 | 0.8    | -0.1583 | 4.892  | 0.1833  | 3.4815 | 19.425  | 0.1708 | 1.6648 |
| 4/19/2019 17:09 | 0.8    | 0.1083  | 4.9955 | -0.0667 | 3.5079 | 19.4909 | 0.1764 | 1.6758 |
| 4/19/2019 17:10 | 0.8417 | -0.2083 | 4.7488 | 0.0667  | 3.4828 | 20.2636 | 0.1694 | 1.6823 |
| 4/19/2019 17:11 | 0.8667 | -0.3833 | 5.0423 | -0.55   | 3.4846 | 21      | 0.1672 | 1.6694 |
| 4/19/2019 17:12 | 0.9    | -0.1083 | 4.8158 | -0.0833 | 3.4828 | 21.7727 | 0.1831 | 1.6553 |
| 4/19/2019 17:13 | 0.9    | 0.3333  | 4.7722 | -0.1667 | 3.4608 | 22.3273 | 0.1651 | 1.6419 |
| 4/19/2019 17:14 | 0.9    | -0.1833 | 4.8195 | -0.05   | 3.4741 | 23.2818 | 0.177  | 1.6675 |
| 4/19/2019 17:15 | 0.9    | 0.6583  | 4.6987 | -0.1    | 3.4535 | 23.56   | 0.1798 | 1.6818 |
| 4/19/2019 17:16 | 0.9    | 0.15    | 4.9307 | -0.2667 | 3.4758 | 23.1    | 0.1726 | 1.692  |
| 4/19/2019 17:17 | 0.9    | 0.5167  | 4.8955 | 0.0833  | 3.4465 | 23.27   | 0.1736 | 1.7084 |
| 4/19/2019 17:18 | 0.9    | -0.6833 | 5.0153 | 0.3     | 3.447  | 23.8    | 0.1563 | 1.6876 |
| 4/19/2019 17:19 | 0.9    | -0.6167 | 4.8582 | -0.3667 | 3.4298 | 23.9546 | 0.1723 | 1.6673 |
| 4/19/2019 17:20 | 0.8833 | 0.3583  | 5.1465 | -0.5833 | 3.4411 | 24.4182 | 0.173  | 1.6787 |
| 4/19/2019 17:21 | 0.9    | 0.225   | 4.8788 | -0.1333 | 3.4582 | 25.2333 | 0.1618 | 1.6564 |
| 4/19/2019 17:22 | 0.9167 | -0.325  | 4.7927 | -0.6333 | 3.4395 | 25.6182 | 0.1828 | 1.6888 |
| 4/19/2019 17:23 | 1      | 0.1667  | 4.8827 | -0.4333 | 3.4581 | 25.7455 | 0.1634 | 1.6798 |
| 4/19/2019 17:24 | 1      | 0.2333  | 4.7977 | -0.3333 | 3.4367 | 26.0273 | 0.1778 | 1.705  |
| 4/19/2019 17:25 | 1      | -0.2    | 4.7913 | -0.2833 | 3.4361 | 26.0455 | 0.1689 | 1.6948 |
| 4/19/2019 17:26 | 1      | -0.3083 | 4.8007 | 0.3333  | 3.4309 | 25.8667 | 0.1665 | 1.7038 |
| 4/19/2019 17:27 | 1      | -0.1    | 4.858  | -0.05   | 3.4418 | 25.8091 | 0.1836 | 1.7148 |
| 4/19/2019 17:28 | 0.9333 | -0.0083 | 4.858  | -0.0167 | 3.4483 | 26.3727 | 0.177  | 1.6926 |
| 4/19/2019 17:29 | 0.8833 | -0.0417 | 5.065  | -0.9167 | 3.4452 | 26.6818 | 0.1828 | 1.7217 |
| 4/19/2019 17:30 | 0.8083 | -0.1583 | 4.7912 | -0.1    | 3.4585 | 26.54   | 0.1782 | 1.7068 |
| 4/19/2019 17:31 | 0.8    | 0.075   | 4.9297 | 0.0833  | 3.4288 | 26.7667 | 0.1714 | 1.7086 |

|                 |        |         |        |         |        |         |        |        |
|-----------------|--------|---------|--------|---------|--------|---------|--------|--------|
| 4/19/2019 17:32 | 0.8    | -0.475  | 4.7083 | -0.85   | 3.4355 | 26.9333 | 0.1748 | 1.7409 |
| 4/19/2019 17:33 | 0.8    | -0.3167 | 4.7665 | -0.5667 | 3.42   | 27.0909 | 0.168  | 1.7227 |
| 4/19/2019 17:34 | 0.7917 | -0.2333 | 5.0343 | 0.1     | 3.4213 | 27.2364 | 0.1768 | 1.6833 |
| 4/19/2019 17:35 | 0.8    | -0.6333 | 5.1002 | -0.25   | 3.4301 | 27.4273 | 0.1727 | 1.692  |
| 4/19/2019 17:36 | 0.8    | 0.1083  | 4.6938 | 0.0833  | 3.4168 | 27.2917 | 0.1666 | 1.7168 |
| 4/19/2019 17:37 | 0.8083 | -0.6417 | 4.9978 | -0.0667 | 3.4149 | 27.2091 | 0.1799 | 1.7112 |
| 4/19/2019 17:38 | 0.8167 | 0.0583  | 4.9523 | 0.1     | 3.4161 | 27.2636 | 0.1655 | 1.6969 |
| 4/19/2019 17:39 | 0.8    | 0.0417  | 4.7315 | -0.6    | 3.4018 | 27.4182 | 0.1732 | 1.6971 |
| 4/19/2019 17:40 | 0.8    | -0.4    | 4.8895 | -0.3333 | 3.4016 | 27.475  | 0.1715 | 1.6892 |
| 4/19/2019 17:41 | 0.8    | 0.2333  | 5.0948 | -0.4333 | 3.3949 | 27.4091 | 0.1642 | 1.6996 |
| 4/19/2019 17:42 | 0.8    | 0.2667  | 4.827  | -0.2    | 3.4394 | 26.9333 | 0.1787 | 1.6835 |
| 4/19/2019 17:43 | 0.8    | 0.425   | 4.7912 | -0.05   | 3.4168 | 26.68   | 0.1676 | 1.7082 |
| 4/19/2019 17:44 | 0.8    | -0.05   | 4.7823 | -0.25   | 3.4152 | 26.4083 | 0.1733 | 1.7285 |
| 4/19/2019 17:45 | 0.8    | -0.5    | 4.8658 | -0.3667 | 3.3813 | 25.7546 | 0.1718 | 1.7348 |
| 4/19/2019 17:46 | 0.8    | -0.2833 | 4.7622 | -0.0667 | 3.3955 | 25.025  | 0.171  | 1.6934 |
| 4/19/2019 17:47 | 0.8    | -0.0167 | 4.8463 | -0.4667 | 3.3828 | 24.3182 | 0.1796 | 1.6807 |
| 4/19/2019 17:48 | 0.8    | 0.125   | 4.927  | -0.3333 | 3.3858 | 24.1417 | 0.1695 | 1.7084 |
| 4/19/2019 17:49 | 0.8833 | -0.575  | 4.9207 | -0.1    | 3.3826 | 24.2909 | 0.1701 | 1.7098 |
| 4/19/2019 17:50 | 0.9    | 0.5333  | 4.955  | 0.3167  | 3.3785 | 24.3364 | 0.173  | 1.7013 |
| 4/19/2019 17:51 | 0.9667 | -0.0667 | 4.9195 | -0.25   | 3.3817 | 24.3833 | 0.1732 | 1.7124 |
| 4/19/2019 17:52 | 0.9667 | -0.65   | 4.8247 | -0.5    | 3.3553 | 24.3    | 0.1746 | 1.7168 |
| 4/19/2019 17:53 | 0.9583 | -0.175  | 4.6537 | -0.5833 | 3.3766 | 24.4182 | 0.1719 | 1.7023 |
| 4/19/2019 17:54 | 0.9    | 0.2583  | 5.0028 | -0.3    | 3.35   | 25.1    | 0.1765 | 1.7098 |
| 4/19/2019 17:55 | 0.9    | -0.25   | 4.9865 | 0.0667  | 3.3697 | 25.4455 | 0.1624 | 1.7042 |
| 4/19/2019 17:56 | 0.9    | 0.2333  | 5.0285 | 0.1167  | 3.3807 | 26.1091 | 0.1731 | 1.7043 |
| 4/19/2019 17:57 | 0.95   | 0.45    | 5.2808 | 0.1667  | 3.3757 | 26.65   | 0.1833 | 1.7128 |
| 4/19/2019 17:58 | 1      | 0.5     | 4.9818 | 0.0833  | 3.3898 | 27.4556 | 0.1642 | 1.7227 |
| 4/19/2019 17:59 | 1      | -0.2    | 4.8998 | -0.6833 | 3.3594 | 28.1583 | 0.1797 | 1.7184 |
| 4/19/2019 18:00 | 1      | -0.15   | 4.8458 | -0.1333 | 3.37   | 28.6909 | 0.17   | 1.7006 |
| 4/19/2019 18:01 | 1      | 0.375   | 4.9803 | 0.0833  | 3.3624 | 27.85   | 0.1767 | 1.6891 |
| 4/19/2019 18:02 | 1      | 0.0333  | 4.775  | 0.5667  | 3.3534 | 26.65   | 0.1765 | 1.6948 |
| 4/19/2019 18:03 | 1      | 0.6167  | 4.7067 | 0.5333  | 3.3664 | 25.575  | 0.1684 | 1.7268 |
| 4/19/2019 18:04 | 1.0083 | -0.0417 | 4.6402 | 0.1     | 3.3513 | 24.05   | 0.1855 | 1.7306 |
| 4/19/2019 18:05 | 1.0083 | 0.375   | 4.7373 | -0.4    | 3.3607 | 22.3273 | 0.1711 | 1.7056 |
| 4/19/2019 18:06 | 1      | 0.025   | 4.9312 | -0.3667 | 3.361  | 20.7546 | 0.173  | 1.7009 |
| 4/19/2019 18:07 | 1      | -0.2833 | 5.1237 | 0.2167  | 3.3608 | 19.075  | 0.1798 | 1.7163 |
| 4/19/2019 18:08 | 1      | -0.0333 | 4.854  | -0.3333 | 3.423  | 17.2818 | 0.1699 | 1.7199 |
| 4/19/2019 18:09 | 0.9833 | 0.1167  | 5.0175 | -0.05   | 3.4522 | 15.55   | 0.1755 | 1.7343 |
| 4/19/2019 18:10 | 0.9    | 0.4667  | 5.145  | -0.35   | 3.4578 | 13.9    | 0.175  | 1.7338 |
| 4/19/2019 18:11 | 0.9    | 0.1417  | 4.7338 | -0.45   | 3.4507 | 12.6364 | 0.1799 | 1.7148 |
| 4/19/2019 18:12 | 0.8417 | -0.4167 | 4.7928 | -0.6167 | 3.459  | 11.0583 | 0.1732 | 1.7151 |
| 4/19/2019 18:13 | 0.8    | -0.4083 | 4.7598 | 0.15    | 3.4492 | 10.2546 | 0.1635 | 1.7021 |
| 4/19/2019 18:14 | 0.8    | 0.125   | 4.9032 | 0.3833  | 3.4628 | 10.2546 | 0.1794 | 1.7019 |
| 4/19/2019 18:15 | 0.8    | -0.0417 | 4.9157 | -0.5333 | 3.4489 | 10.3    | 0.1677 | 1.7126 |
| 4/19/2019 18:16 | 0.7583 | -0.1917 | 4.7575 | 0.0667  | 3.4582 | 10.9333 | 0.1779 | 1.7148 |
| 4/19/2019 18:17 | 0.7    | -0.0083 | 4.9862 | -0.15   | 3.447  | 11.9182 | 0.1749 | 1.7244 |
| 4/19/2019 18:18 | 0.7    | 0.025   | 4.835  | -0.2    | 3.4393 | 13.1182 | 0.1653 | 1.7333 |

|                 |        |         |        |         |        |         |        |        |
|-----------------|--------|---------|--------|---------|--------|---------|--------|--------|
| 4/19/2019 18:19 | 0.7    | 0.3083  | 4.7633 | 0.1333  | 3.4557 | 13.8417 | 0.1801 | 1.7137 |
| 4/19/2019 18:20 | 0.7    | 0.225   | 4.8125 | -0.3667 | 3.4273 | 15.275  | 0.1721 | 1.7161 |
| 4/19/2019 18:21 | 0.65   | 0.1083  | 4.8793 | 0.1667  | 3.4513 | 16.9    | 0.1817 | 1.7153 |
| 4/19/2019 18:22 | 0.6667 | -0.3    | 5.255  | 0.2333  | 3.4475 | 18.6    | 0.1749 | 1.6994 |
| 4/19/2019 18:23 | 0.6    | 0.125   | 4.8012 | -0.25   | 3.4443 | 20.0546 | 0.1701 | 1.705  |
| 4/19/2019 18:24 | 0.6    | 0.125   | 4.7318 | -0.6    | 3.4485 | 21.7364 | 0.1851 | 1.7004 |
| 4/19/2019 18:25 | 0.6    | -0.025  | 4.635  | -0.5333 | 3.4272 | 23.2091 | 0.1648 | 1.7058 |
| 4/19/2019 18:26 | 0.675  | 0.6667  | 4.7558 | 0.1167  | 3.4386 | 24.0364 | 0.178  | 1.7127 |
| 4/19/2019 18:27 | 0.7    | 0.5     | 4.671  | 0.05    | 3.4132 | 24.7917 | 0.1785 | 1.7282 |
| 4/19/2019 18:28 | 0.7    | 0.0667  | 4.6645 | 0.05    | 3.4139 | 25.4364 | 0.1708 | 1.7502 |
| 4/19/2019 18:29 | 0.7    | -0.1833 | 4.6892 | -0.55   | 3.4113 | 26.3    | 0.1788 | 1.7126 |
| 4/19/2019 18:30 | 0.7917 | 0.1917  | 4.8352 | -0.45   | 3.4052 | 26.725  | 0.1648 | 1.6885 |
| 4/19/2019 18:31 | 0.8167 | 0.0167  | 4.5792 | -0.0167 | 3.4106 | 27.65   | 0.1788 | 1.6875 |
| 4/19/2019 18:32 | 0.9    | -0.1417 | 5.0502 | -0.3167 | 3.4103 | 28.175  | 0.1745 | 1.7104 |
| 4/19/2019 18:33 | 0.8083 | 0.275   | 4.7913 | -0.5667 | 3.403  | 28.5636 | 0.1754 | 1.7378 |
| 4/19/2019 18:34 | 0.8    | -0.0833 | 4.7584 | -0.3833 | 3.3799 | 28.6    | 0.1797 | 1.6958 |
| 4/19/2019 18:35 | 0.8    | 0.2333  | 5.1547 | -0.55   | 3.3788 | 28.5182 | 0.1659 | 1.6907 |
| 4/19/2019 18:36 | 0.8    | 0.25    | 5.0932 | -0.3833 | 3.3747 | 28.35   | 0.1786 | 1.7232 |
| 4/19/2019 18:37 | 0.8    | 0.0417  | 4.7896 | -0.35   | 3.4036 | 28.4    | 0.1766 | 1.7185 |
| 4/19/2019 18:38 | 0.7667 | -0.5417 | 4.8015 | -1.05   | 3.3771 | 28.7333 | 0.1706 | 1.7293 |
| 4/19/2019 18:39 | 0.75   | 0.0333  | 4.8426 | 0.0167  | 3.3869 | 29.3667 | 0.1748 | 1.7238 |
| 4/19/2019 18:40 | 0.7833 | -0.5083 | 4.6495 | -0.15   | 3.3875 | 29.7455 | 0.1649 | 1.7413 |
| 4/19/2019 18:41 | 0.75   | -0.4417 | 4.8835 | -0.5667 | 3.3483 | 29.8727 | 0.1808 | 1.734  |
| 4/19/2019 18:42 | 0.8    | -0.625  | 5.1207 | -0.25   | 3.3605 | 29.9    | 0.1717 | 1.7318 |
| 4/19/2019 18:43 | 0.8    | 0.0833  | 4.8435 | 0.5667  | 3.3696 | 29.9417 | 0.1729 | 1.7377 |
| 4/19/2019 18:44 | 0.775  | -0.2167 | 4.6341 | -0.35   | 3.3566 | 30      | 0.1795 | 1.7168 |
| 4/19/2019 18:45 | 0.7    | -0.125  | 4.6544 | 0.0333  | 3.3443 | 30.1    | 0.1668 | 1.7183 |
| 4/19/2019 18:46 | 0.6917 | 0.2917  | 4.5054 | -0.3833 | 3.3266 | 30.1    | 0.175  | 1.718  |
| 4/19/2019 18:47 | 0.6083 | -0.0083 | 4.6812 | 0.0833  | 3.3547 | 30.1182 | 0.1695 | 1.7208 |
| 4/19/2019 18:48 | 0.675  | -0.2917 | 4.5422 | -0.0333 | 3.3482 | 30.3727 | 0.1702 | 1.7368 |
| 4/19/2019 18:49 | 0.7    | 0.3083  | 4.8416 | -0.2833 | 3.3303 | 30.4546 | 0.1738 | 1.7404 |
| 4/19/2019 18:50 | 0.6917 | -0.4083 | 4.852  | -0.35   | 3.3424 | 30.5667 | 0.1614 | 1.7494 |
| 4/19/2019 18:51 | 0.6333 | 0.3333  | 4.762  | 0.1167  | 3.3434 | 30.6    | 0.184  | 1.7233 |
| 4/19/2019 18:52 | 0.6    | 0.0583  | 4.7083 | -0.25   | 3.3367 | 30.6    | 0.1695 | 1.7101 |
| 4/19/2019 18:53 | 0.6    | 0.3083  | 4.9948 | -0.8    | 3.3208 | 30.6    | 0.1764 | 1.7423 |
| 4/19/2019 18:54 | 0.6583 | 0.45    | 4.7253 | 0.5     | 3.3108 | 30.6364 | 0.1738 | 1.7619 |
| 4/19/2019 18:55 | 0.7    | 0.3167  | 4.9465 | -0.4833 | 3.3018 | 30.7    | 0.1672 | 1.779  |
| 4/19/2019 18:56 | 0.7    | 0.15    | 4.6632 | -0.35   | 3.3129 | 30.7    | 0.1778 | 1.7554 |
| 4/19/2019 18:57 | 0.7    | -0.2417 | 5.0272 | -0.0667 | 3.2947 | 30.6636 | 0.1616 | 1.7516 |
| 4/19/2019 18:58 | 0.7    | -0.3583 | 4.6708 | -0.7667 | 3.2811 | 30.6909 | 0.183  | 1.7713 |
| 4/19/2019 18:59 | 0.7    | 0.0583  | 4.8272 | -0.4667 | 3.2943 | 30.8    | 0.1614 | 1.7385 |
| 4/19/2019 19:00 | 0.7    | 0.5     | 4.7973 | -0.0333 | 3.2763 | 30.8    | 0.1674 | 1.731  |
| 4/19/2019 19:01 | 0.7167 | -0.075  | 4.5178 | -0.2833 | 3.2651 | 30.8    | 0.1745 | 1.7529 |
| 4/19/2019 19:02 | 0.8    | -0.1833 | 4.7828 | 0.0667  | 3.2639 | 30.8    | 0.1641 | 1.7693 |
| 4/19/2019 19:03 | 0.8364 | 0.4     | 4.7998 | -0.15   | 3.2647 | 30.8    | 0.1752 | 1.7478 |
| 4/19/2019 19:04 | 0.8333 | 0.3167  | 4.7008 | -0.4333 | 3.2514 | 30.8    | 0.1626 | 1.7609 |
| 4/19/2019 19:05 | 0.8    | -0.0333 | 4.6878 | -0.2    | 3.2568 | 30.8    | 0.1683 | 1.7767 |

|                 |        |         |        |         |        |         |        |        |
|-----------------|--------|---------|--------|---------|--------|---------|--------|--------|
| 4/19/2019 19:06 | 0.8    | 0.1917  | 5.0719 | -0.1    | 3.2498 | 30.8    | 0.1776 | 1.7603 |
| 4/19/2019 19:07 | 0.8    | 0.0333  | 5.0033 | -0.3667 | 3.256  | 30.8    | 0.1572 | 1.7403 |
| 4/19/2019 19:08 | 0.8    | -0.6333 | 4.536  | -0.8    | 3.256  | 30.8    | 0.1883 | 1.746  |
| 4/19/2019 19:09 | 0.8    | 0.6     | 4.8106 | -0.0833 | 3.2058 | 30.8    | 0.1665 | 1.7368 |
| 4/19/2019 19:10 | 0.8    | 0.475   | 4.7371 | 0.0333  | 3.1812 | 30.8    | 0.1692 | 1.7315 |
| 4/19/2019 19:11 | 0.8    | -0.0417 | 4.9255 | -0.2    | 3.1603 | 30.7333 | 0.1774 | 1.7256 |
| 4/19/2019 19:12 | 0.7833 | -0.1333 | 4.3692 | -0.4167 | 3.1718 | 30.6667 | 0.165  | 1.7422 |
| 4/19/2019 19:13 | 0.7917 | -0.2083 | 4.7842 | -1      | 3.167  | 30.6083 | 0.1758 | 1.745  |
| 4/19/2019 19:14 | 0.7    | 0.2583  | 4.7871 | 0.0333  | 3.1515 | 30.6    | 0.1587 | 1.7678 |
| 4/19/2019 19:15 | 0.7    | -0.3167 | 4.7156 | -0.1333 | 3.1427 | 30.6545 | 0.1747 | 1.7453 |
| 4/19/2019 19:16 | 0.7    | -0.6583 | 4.8    | -0.4667 | 3.1405 | 30.7364 | 0.1796 | 1.7603 |
| 4/19/2019 19:17 | 0.7    | -0.5083 | 4.835  | -0.3667 | 3.1593 | 30.8    | 0.1601 | 1.7359 |
| 4/19/2019 19:18 | 0.6167 | -0.1583 | 4.6686 | 0.05    | 3.1315 | 30.8    | 0.1869 | 1.7477 |
| 4/19/2019 19:19 | 0.5417 | 0.1583  | 4.7659 | -0.3667 | 3.1297 | 30.8    | 0.1563 | 1.737  |
| 4/19/2019 19:20 | 0.5083 | -0.5417 | 4.7375 | -0.3333 | 3.1475 | 30.8917 | 0.1709 | 1.7576 |
| 4/19/2019 19:21 | 0.6    | -0.95   | 4.7243 | -0.0667 | 3.1256 | 30.9727 | 0.1717 | 1.7666 |
| 4/19/2019 19:22 | 0.6    | -0.3417 | 4.8176 | -0.95   | 3.1293 | 31.03   | 0.1595 | 1.7424 |
| 4/19/2019 19:23 | 0.6    | -0.0667 | 4.818  | -0.5333 | 3.1318 | 31.075  | 0.1716 | 1.7278 |
| 4/19/2019 19:24 | 0.6    | 0.1583  | 4.5239 | -0.75   | 3.147  | 31.1    | 0.1624 | 1.7315 |
| 4/19/2019 19:25 | 0.5167 | -0.05   | 4.7986 | -0.1333 | 3.142  | 31.0083 | 0.165  | 1.7341 |
| 4/19/2019 19:26 | 0.5    | -0.4333 | 4.6424 | -0.3833 | 3.1484 | 31.1    | 0.1666 | 1.762  |
| 4/19/2019 19:27 | 0.6    | -0.0417 | 4.7069 | -0.9167 | 3.1476 | 31.0083 | 0.1586 | 1.7557 |
| 4/19/2019 19:28 | 0.6167 | 0.4167  | 4.7864 | 0.05    | 3.1308 | 31      | 0.1796 | 1.7473 |
| 4/19/2019 19:29 | 0.625  | 0.3667  | 4.8066 | 0.0833  | 3.1321 | 31      | 0.1538 | 1.7444 |
| 4/19/2019 19:30 | 0.6    | -0.25   | 4.9696 | 0.05    | 3.1218 | 31      | 0.1741 | 1.7539 |
| 4/19/2019 19:31 | 0.5917 | -0.0333 | 4.9573 | -0.3333 | 3.129  | 31      | 0.1641 | 1.7649 |
| 4/19/2019 19:32 | 0.5917 | -0.5167 | 4.8033 | 0.0667  | 3.1415 | 30.99   | 0.1612 | 1.7688 |
| 4/19/2019 19:33 | 0.5909 | -0.15   | 4.7803 | -0.25   | 3.1118 | 30.9    | 0.1753 | 1.7538 |
| 4/19/2019 19:34 | 0.5083 | -0.1083 | 4.7513 | -0.4667 | 3.1305 | 30.9    | 0.1591 | 1.7406 |
| 4/19/2019 19:35 | 0.5    | -0.2083 | 4.7062 | -0.6167 | 3.1078 | 30.85   | 0.1744 | 1.7143 |
| 4/19/2019 19:36 | 0.5667 | -0.05   | 4.4004 | -0.5    | 3.1271 | 30.71   | 0.1735 | 1.7613 |
| 4/19/2019 19:37 | 0.6    | 0.2583  | 4.614  | -0.5667 | 3.1272 | 30.6417 | 0.1622 | 1.7604 |
| 4/19/2019 19:38 | 0.6917 | 0.1417  | 4.7137 | 0.1167  | 3.1198 | 30.6818 | 0.1709 | 1.7507 |
| 4/19/2019 19:39 | 0.7    | -0.6333 | 4.6671 | -0.1    | 3.1152 | 30.7    | 0.1528 | 1.764  |
| 4/19/2019 19:40 | 0.7    | -0.5    | 4.7885 | -0.6    | 3.1287 | 30.7    | 0.1754 | 1.7655 |
| 4/19/2019 19:41 | 0.7    | 0.0417  | 4.8768 | -0.4    | 3.1223 | 30.7    | 0.1666 | 1.7481 |
| 4/19/2019 19:42 | 0.7    | -0.1917 | 4.8908 | -0.6833 | 3.1089 | 30.6636 | 0.1683 | 1.744  |
| 4/19/2019 19:43 | 0.7    | -0.5833 | 4.6791 | -0.25   | 3.1176 | 30.6182 | 0.1843 | 1.7521 |
| 4/19/2019 19:44 | 0.7583 | -0.525  | 4.5025 | -0.45   | 3.1056 | 30.6    | 0.1586 | 1.7441 |
| 4/19/2019 19:45 | 0.7583 | -0.4417 | 4.7603 | -0.8833 | 3.1241 | 30.6    | 0.175  | 1.7433 |
| 4/19/2019 19:46 | 0.8    | -0.1    | 4.7838 | -0.7833 | 3.1222 | 30.6    | 0.1639 | 1.7543 |
| 4/19/2019 19:47 | 0.8    | -0.1083 | 4.8719 | 0.1333  | 3.0825 | 30.6182 | 0.1722 | 1.7683 |
| 4/19/2019 19:48 | 0.85   | -0.2    | 4.9958 | -0.4    | 3.0991 | 30.725  | 0.1773 | 1.7653 |
| 4/19/2019 19:49 | 0.9    | -0.7417 | 4.6119 | -0.7167 | 3.0981 | 31      | 0.1638 | 1.7503 |
| 4/19/2019 19:50 | 0.875  | -0.4333 | 4.636  | 0.15    | 3.0929 | 31      | 0.1794 | 1.7671 |
| 4/19/2019 19:51 | 0.8083 | -1.025  | 4.9594 | -0.1833 | 3.0974 | 31      | 0.1691 | 1.7513 |
| 4/19/2019 19:52 | 0.8    | -0.4417 | 4.8931 | -0.5333 | 3.1146 | 31.0091 | 0.1703 | 1.7306 |

|                 |        |         |        |         |        |         |        |        |
|-----------------|--------|---------|--------|---------|--------|---------|--------|--------|
| 4/19/2019 19:53 | 0.875  | 0.575   | 4.7874 | -0.35   | 3.0978 | 31.1    | 0.1768 | 1.7505 |
| 4/19/2019 19:54 | 0.9    | 0.35    | 4.8885 | -0.0167 | 3.1015 | 31.1727 | 0.1549 | 1.7621 |
| 4/19/2019 19:55 | 0.85   | -0.3083 | 4.7193 | -0.4333 | 3.0955 | 31.2    | 0.1775 | 1.7577 |
| 4/19/2019 19:56 | 0.8    | -0.2583 | 4.6478 | -0.3333 | 3.0893 | 31.2    | 0.1615 | 1.7445 |
| 4/19/2019 19:57 | 0.8    | -0.275  | 4.8033 | -0.5667 | 3.0922 | 31.2    | 0.1799 | 1.7334 |
| 4/19/2019 19:58 | 0.8    | -0.5833 | 4.7378 | -0.4    | 3.0835 | 31.25   | 0.1792 | 1.7473 |
| 4/19/2019 19:59 | 0.8167 | 0.4417  | 4.8494 | -0.5667 | 3.0936 | 31.1583 | 0.1645 | 1.7487 |
| 4/19/2019 20:00 | 0.8    | -0.3083 | 4.678  | -0.3    | 3.0823 | 31.1    | 0.1744 | 1.7833 |
| 4/19/2019 20:01 | 0.8    | -0.4083 | 4.6294 | -0.6    | 3.0913 | 31.1364 | 0.1664 | 1.7854 |
| 4/19/2019 20:02 | 0.775  | -0.1417 | 4.7487 | -0.35   | 3.0923 | 31.0818 | 0.1761 | 1.7461 |
| 4/19/2019 20:03 | 0.7909 | -0.3833 | 4.759  | -0.4333 | 3.0825 | 31.0909 | 0.165  | 1.7501 |
| 4/19/2019 20:04 | 0.7667 | -0.2167 | 4.5485 | -0.8333 | 3.0996 | 31.1    | 0.1605 | 1.7448 |
| 4/19/2019 20:05 | 0.75   | -0.1833 | 4.6332 | -0.1333 | 3.0791 | 31.1    | 0.1724 | 1.7489 |
| 4/19/2019 20:06 | 0.7    | -0.0333 | 4.5775 | -0.5833 | 3.0875 | 31.0833 | 0.1612 | 1.7355 |
| 4/19/2019 20:07 | 0.7    | -0.4667 | 4.7475 | -0.4333 | 3.0954 | 31      | 0.1778 | 1.7324 |
| 4/19/2019 20:08 | 0.7    | 0.0167  | 4.5127 | -0.95   | 3.0786 | 31.0091 | 0.1641 | 1.7718 |
| 4/19/2019 20:09 | 0.7    | -0.625  | 4.6988 | -0.0667 | 3.079  | 31.1    | 0.1621 | 1.7546 |
| 4/19/2019 20:10 | 0.7    | -0.3583 | 4.849  | -0.9    | 3.0417 | 31.1667 | 0.1774 | 1.7353 |
| 4/19/2019 20:11 | 0.6333 | -0.575  | 4.8503 | -1.05   | 2.9976 | 31.175  | 0.1668 | 1.7363 |
| 4/19/2019 20:12 | 0.6    | 0.2333  | 4.5092 | -0.5    | 2.9769 | 31.2818 | 0.1714 | 1.7877 |
| 4/19/2019 20:13 | 0.625  | -0.4917 | 4.9533 | -0.8667 | 2.985  | 31.25   | 0.1629 | 1.7673 |
| 4/19/2019 20:14 | 0.6333 | -0.5583 | 4.9165 | -0.8667 | 2.9933 | 31.3    | 0.1686 | 1.7463 |
| 4/19/2019 20:15 | 0.675  | -0.1833 | 4.6915 | -0.4667 | 2.9904 | 31.3    | 0.1744 | 1.7432 |
| 4/19/2019 20:16 | 0.7    | 0.4917  | 4.8075 | -0.35   | 2.9796 | 31.3    | 0.1674 | 1.7403 |
| 4/19/2019 20:17 | 0.7    | -0.5583 | 4.9785 | -0.4333 | 2.9908 | 31.3    | 0.1763 | 1.7532 |
| 4/19/2019 20:18 | 0.7    | -0.2333 | 4.9078 | 0       | 2.9939 | 31.3    | 0.1707 | 1.7303 |
| 4/19/2019 20:19 | 0.7    | -0.3833 | 4.7307 | -0.8833 | 2.9837 | 31.3636 | 0.1694 | 1.7314 |
| 4/19/2019 20:20 | 0.6333 | -0.225  | 4.8308 | -0.15   | 2.9989 | 31.3833 | 0.1684 | 1.7493 |
| 4/19/2019 20:21 | 0.6    | 0.025   | 5.4417 | -0.3167 | 2.9941 | 31.3    | 0.1619 | 1.7431 |
| 4/19/2019 20:22 | 0.6    | 0.2083  | 3.759  | -0.15   | 3.01   | 31.3917 | 0.1761 | 1.7293 |
| 4/19/2019 20:23 | 0.6    | -0.4    | 4.9308 | -0.2667 | 3.0032 | 31.3833 | 0.1708 | 1.7246 |
| 4/19/2019 20:24 | 0.6    | -0.5417 | 4.8978 | 0.4667  | 2.9953 | 31.4    | 0.1675 | 1.7551 |
| 4/19/2019 20:25 | 0.55   | 0.1333  | 4.7283 | -0.3833 | 2.9863 | 31.4    | 0.1752 | 1.7555 |
| 4/19/2019 20:26 | 0.5167 | -0.15   | 4.6938 | -0.7167 | 2.9906 | 31.4    | 0.164  | 1.7672 |
| 4/19/2019 20:27 | 0.5417 | 0.3167  | 3.3807 | -0.1833 | 2.9805 | 31.4    | 0.1771 | 1.7794 |
| 4/19/2019 20:28 | 0.5333 | -0.6    | 5.031  | -0.2833 | 2.9729 | 31.375  | 0.1691 | 1.7897 |
| 4/19/2019 20:29 | 0.5083 | 0.3667  | 4.8127 | -0.5833 | 2.9786 | 31.3    | 0.1696 | 1.7463 |
| 4/19/2019 20:30 | 0.5    | 0.5917  | 5.0722 | -0.2667 | 2.9918 | 31.3    | 0.1738 | 1.7594 |
| 4/19/2019 20:31 | 0.5    | -0.3833 | 4.4922 | -0.5333 | 2.9818 | 31.3    | 0.1644 | 1.732  |
| 4/19/2019 20:32 | 0.5    | -0.225  | 4.7002 | -0.7    | 2.9965 | 31.2    | 0.168  | 1.7414 |
| 4/19/2019 20:33 | 0.4667 | 0.25    | 4.8868 | -0.25   | 2.9942 | 31.2    | 0.1575 | 1.7558 |
| 4/19/2019 20:34 | 0.4167 | 0.3667  | 4.9157 | 0.3333  | 2.9899 | 31.2    | 0.1671 | 1.7308 |
| 4/19/2019 20:35 | 0.4    | -0.0833 | 4.73   | -0.7    | 2.991  | 31.2    | 0.1633 | 1.7458 |
| 4/19/2019 20:36 | 0.45   | 0.1833  | 4.8033 | -0.8333 | 2.9876 | 31.175  | 0.1565 | 1.7565 |
| 4/19/2019 20:37 | 0.4417 | -0.175  | 4.6088 | 0.1333  | 2.9958 | 31.1727 | 0.174  | 1.7338 |
| 4/19/2019 20:38 | 0.5    | 0.8417  | 4.9213 | -0.3667 | 3.0013 | 31.1417 | 0.1619 | 1.747  |
| 4/19/2019 20:39 | 0.5    | 0.4417  | 4.7513 | -0.05   | 2.9903 | 31.1273 | 0.1695 | 1.7434 |

|                 |        |         |        |         |        |         |        |        |
|-----------------|--------|---------|--------|---------|--------|---------|--------|--------|
| 4/19/2019 20:40 | 0.5    | -0.0083 | 4.6463 | -0.2167 | 3.0156 | 31.0546 | 0.1662 | 1.756  |
| 4/19/2019 20:41 | 0.5    | -0.4583 | 4.668  | -0.4    | 3.025  | 30.9636 | 0.166  | 1.7328 |
| 4/19/2019 20:42 | 0.5    | 0.0833  | 4.818  | 0.3667  | 2.9919 | 30.9333 | 0.1706 | 1.7249 |
| 4/19/2019 20:43 | 0.5    | -0.0417 | 4.5732 | -0.65   | 3.0039 | 30.8818 | 0.1604 | 1.742  |
| 4/19/2019 20:44 | 0.55   | -0.675  | 4.6285 | -0.35   | 3.0128 | 30.7273 | 0.1722 | 1.7333 |
| 4/19/2019 20:45 | 0.6    | 0.3833  | 4.8113 | -0.2167 | 3.0121 | 30.7818 | 0.1702 | 1.7453 |
| 4/19/2019 20:46 | 0.6    | -0.15   | 4.712  | -0.8333 | 3.0029 | 30.8    | 0.1639 | 1.7433 |
| 4/19/2019 20:47 | 0.6    | -0.2917 | 4.6925 | -0.7333 | 3.0317 | 30.72   | 0.1706 | 1.7563 |
| 4/19/2019 20:48 | 0.6    | -0.3417 | 5.0007 | -0.5    | 3.0252 | 30.7364 | 0.1527 | 1.7372 |
| 4/19/2019 20:49 | 0.6333 | -0.0083 | 4.4872 | -0.1833 | 3.0071 | 30.6182 | 0.1723 | 1.7085 |
| 4/19/2019 20:50 | 0.7    | 0.2583  | 4.6482 | -0.2833 | 3.0248 | 30.675  | 0.1644 | 1.7356 |
| 4/19/2019 20:51 | 0.7    | 0.2333  | 4.6817 | -0.1833 | 3.0367 | 30.5583 | 0.1665 | 1.7303 |
| 4/19/2019 20:52 | 0.7    | -0.025  | 4.7648 | 0.45    | 3.0339 | 30.6273 | 0.1717 | 1.7124 |
| 4/19/2019 20:53 | 0.7    | -0.3667 | 4.6672 | -0.1833 | 3.0022 | 30.7    | 0.1575 | 1.7304 |
| 4/19/2019 20:54 | 0.7    | -0.3583 | 4.5587 | -0.1333 | 2.9911 | 30.7546 | 0.1676 | 1.7308 |
| 4/19/2019 20:55 | 0.7    | 0.0917  | 4.5437 | -0.6333 | 3.0193 | 30.8455 | 0.1523 | 1.731  |
| 4/19/2019 20:56 | 0.7    | -0.0083 | 4.6512 | -0.1167 | 2.9996 | 31      | 0.168  | 1.7524 |
| 4/19/2019 20:57 | 0.7083 | -0.2    | 4.6488 | -0.5833 | 3.0233 | 31      | 0.1651 | 1.7343 |
| 4/19/2019 20:58 | 0.8    | 0.6667  | 4.6868 | -0.0667 | 3.0231 | 30.9    | 0.1615 | 1.7537 |
| 4/19/2019 20:59 | 0.8    | -0.025  | 4.7852 | -0.4    | 3.0296 | 30.9    | 0.166  | 1.7393 |
| 4/19/2019 21:00 | 0.8    | 0.1     | 4.741  | -0.9167 | 3.0215 | 30.9091 | 0.1542 | 1.7348 |
| 4/19/2019 21:01 | 0.8    | -0.0417 | 4.583  | -0.4667 | 3.0076 | 31.08   | 0.1697 | 1.7193 |
| 4/19/2019 21:02 | 0.8    | 0.0583  | 4.6773 | -0.7167 | 3.0083 | 31.0364 | 0.1625 | 1.7192 |
| 4/19/2019 21:03 | 0.8    | 0.0083  | 4.6298 | -0.2667 | 3.0004 | 31.1455 | 0.1665 | 1.7155 |
| 4/19/2019 21:04 | 0.8    | -0.0833 | 4.6588 | -0.5667 | 3.0303 | 31.2    | 0.1612 | 1.7447 |
| 4/19/2019 21:05 | 0.8    | 0.175   | 4.545  | -0.3    | 3.01   | 31.2    | 0.1528 | 1.7428 |
| 4/19/2019 21:06 | 0.8083 | -0.2917 | 4.623  | -0.2667 | 3.0166 | 31.2    | 0.1788 | 1.7265 |
| 4/19/2019 21:07 | 0.8167 | -0.625  | 4.5435 | -0.9333 | 3.0093 | 31.2    | 0.1491 | 1.7288 |
| 4/19/2019 21:08 | 0.8417 | -0.3    | 4.605  | -0.75   | 2.9967 | 31.2    | 0.1618 | 1.7237 |
| 4/19/2019 21:09 | 0.8583 | 0.3167  | 4.3525 | -0.5333 | 2.9947 | 31.2    | 0.1687 | 1.7317 |
| 4/19/2019 21:10 | 0.8    | -0.6333 | 4.7247 | -0.5167 | 2.995  | 31.2917 | 0.1617 | 1.7201 |
| 4/19/2019 21:11 | 0.8    | -0.1167 | 4.4457 | -0.55   | 2.9893 | 31.2    | 0.1718 | 1.713  |
| 4/19/2019 21:12 | 0.8    | -0.325  | 4.564  | -0.7167 | 2.949  | 31.2    | 0.1504 | 1.7195 |
| 4/19/2019 21:13 | 0.8    | -0.6417 | 4.6938 | -0.0167 | 2.9517 | 31.2    | 0.1699 | 1.7314 |
| 4/19/2019 21:14 | 0.8    | 0.325   | 4.5908 | -0.5167 | 2.9613 | 31.2    | 0.1498 | 1.745  |
| 4/19/2019 21:15 | 0.7667 | -0.7667 | 4.3993 | -0.2667 | 2.9599 | 31.2    | 0.1659 | 1.7246 |
| 4/19/2019 21:16 | 0.7    | -0.025  | 4.72   | -0.55   | 2.9387 | 31.2    | 0.1735 | 1.7113 |
| 4/19/2019 21:17 | 0.7    | -0.2167 | 4.833  | -0.1167 | 2.9439 | 31.2    | 0.1465 | 1.7393 |
| 4/19/2019 21:18 | 0.7    | 0.1     | 4.8573 | -0.4833 | 2.9383 | 31.2833 | 0.1675 | 1.7138 |
| 4/19/2019 21:19 | 0.7    | -0.125  | 4.4702 | -0.3333 | 2.9343 | 31.2583 | 0.1485 | 1.7157 |
| 4/19/2019 21:20 | 0.6917 | -0.05   | 4.8563 | -0.4667 | 2.9304 | 31.2    | 0.1674 | 1.7123 |
| 4/19/2019 21:21 | 0.7    | -0.1417 | 4.5085 | -0.2833 | 2.9317 | 31.2    | 0.1583 | 1.7284 |
| 4/19/2019 21:22 | 0.6917 | -0.425  | 4.5283 | -0.0333 | 2.9301 | 31.2167 | 0.1583 | 1.7431 |
| 4/19/2019 21:23 | 0.6083 | -0.3    | 4.6378 | -0.1833 | 2.9268 | 31.325  | 0.1735 | 1.7291 |
| 4/19/2019 21:24 | 0.6    | 0.0167  | 4.6677 | -0.15   | 2.9263 | 31.4    | 0.1535 | 1.7271 |
| 4/19/2019 21:25 | 0.6    | -0.3667 | 4.7755 | -0.6333 | 2.9245 | 31.3455 | 0.1699 | 1.7374 |
| 4/19/2019 21:26 | 0.6    | -0.5083 | 4.62   | -0.75   | 2.9204 | 31.39   | 0.1596 | 1.7259 |



|                 |        |         |        |         |        |         |        |        |
|-----------------|--------|---------|--------|---------|--------|---------|--------|--------|
| 4/19/2019 21:27 | 0.625  | -0.475  | 4.6407 | -0.7333 | 2.9195 | 31.4    | 0.1651 | 1.7318 |
| 4/19/2019 21:28 | 0.65   | 0.5833  | 4.7787 | -0.4833 | 2.9053 | 31.4    | 0.1619 | 1.7401 |
| 4/19/2019 21:29 | 0.5583 | -0.925  | 4.9018 | -0.35   | 2.9018 | 31.3833 | 0.1497 | 1.7071 |
| 4/19/2019 21:30 | 0.475  | 0.0167  | 4.7338 | -0.65   | 2.9026 | 31.275  | 0.1726 | 1.7166 |
| 4/19/2019 21:31 | 0.4    | -0.25   | 4.6505 | -0.8    | 2.9078 | 31.2091 | 0.1578 | 1.7348 |
| 4/19/2019 21:32 | 0.4    | -0.2    | 4.7808 | 0.25    | 2.9002 | 31.3    | 0.1597 | 1.7595 |
| 4/19/2019 21:33 | 0.4    | -0.275  | 4.8415 | 0.05    | 2.8794 | 31.2455 | 0.1618 | 1.7461 |
| 4/19/2019 21:34 | 0.4    | -0.3083 | 4.6356 | 0.1833  | 2.8755 | 31.1583 | 0.1538 | 1.7291 |
| 4/19/2019 21:35 | 0.4    | 0.325   | 4.7391 | 0.3167  | 2.8864 | 31.1    | 0.1699 | 1.7494 |
| 4/19/2019 21:36 | 0.4    | -0.4833 | 4.4278 | -0.4333 | 2.8745 | 31.1    | 0.1533 | 1.7571 |
| 4/19/2019 21:37 | 0.4083 | -0.15   | 4.4133 | 0.1     | 2.8902 | 31.1    | 0.1629 | 1.7561 |
| 4/19/2019 21:38 | 0.5    | 0.1583  | 4.3693 | -0.2167 | 2.8732 | 31.0667 | 0.1671 | 1.7523 |
| 4/19/2019 21:39 | 0.5    | 0.275   | 4.4738 | -0.4167 | 2.8733 | 31.1    | 0.1612 | 1.7368 |
| 4/19/2019 21:40 | 0.5    | -0.3583 | 4.6076 | 0.0167  | 2.8631 | 31.1333 | 0.1615 | 1.7334 |
| 4/19/2019 21:41 | 0.5    | 0.225   | 4.8338 | 0.2333  | 2.8713 | 31.2182 | 0.1464 | 1.7477 |
| 4/19/2019 21:42 | 0.5333 | 0.15    | 4.6494 | -0.65   | 2.8628 | 31.325  | 0.1612 | 1.721  |
| 4/19/2019 21:43 | 0.5917 | 0.1583  | 4.7271 | -0.1    | 2.8452 | 31.4    | 0.1584 | 1.7332 |
| 4/19/2019 21:44 | 0.5    | -0.25   | 4.5058 | -0.1333 | 2.8595 | 31.4    | 0.1629 | 1.7518 |
| 4/19/2019 21:45 | 0.5    | 0.2083  | 4.5697 | -0.25   | 2.8418 | 31.4    | 0.1634 | 1.75   |
| 4/19/2019 21:46 | 0.4917 | -0.275  | 4.5179 | -0.5    | 2.8483 | 31.4    | 0.1606 | 1.7147 |
| 4/19/2019 21:47 | 0.575  | -0.625  | 4.5438 | 0.0833  | 2.8549 | 31.4    | 0.1626 | 1.7328 |
| 4/19/2019 21:48 | 0.6083 | -0.2583 | 4.6106 | -0.35   | 2.8386 | 31.375  | 0.1518 | 1.7363 |
| 4/19/2019 21:49 | 0.7    | -0.125  | 4.468  | -0.85   | 2.8422 | 31.4    | 0.1618 | 1.7638 |
| 4/19/2019 21:50 | 0.6167 | -0.3583 | 4.6058 | -0.2333 | 2.8388 | 31.5    | 0.1598 | 1.7698 |
| 4/19/2019 21:51 | 0.6833 | -0.5083 | 4.5957 | 0.1667  | 2.8494 | 31.5    | 0.1542 | 1.7367 |
| 4/19/2019 21:52 | 0.7    | -0.7417 | 4.3696 | -0.3833 | 2.8373 | 31.5    | 0.1673 | 1.7403 |
| 4/19/2019 21:53 | 0.7    | -0.2083 | 4.5956 | -0.6333 | 2.8348 | 31.4182 | 0.1505 | 1.7468 |
| 4/19/2019 21:54 | 0.7    | -0.3333 | 4.5904 | -0.45   | 2.8358 | 31.3667 | 0.1732 | 1.7559 |
| 4/19/2019 21:55 | 0.7    | -0.475  | 4.7638 | -0.15   | 2.836  | 31.3    | 0.1595 | 1.7388 |
| 4/19/2019 21:56 | 0.6583 | 0.1917  | 4.497  | -0.9167 | 2.8192 | 31.3    | 0.1656 | 1.7486 |
| 4/19/2019 21:57 | 0.6    | -0.3917 | 4.7317 | 0.6     | 2.8142 | 31.25   | 0.1647 | 1.7361 |
| 4/19/2019 21:58 | 0.6    | 0.05    | 4.3287 | -0.3833 | 2.8128 | 31.2167 | 0.1545 | 1.7335 |
| 4/19/2019 21:59 | 0.5833 | 0.3333  | 4.6218 | -0.2667 | 2.8109 | 31.3727 | 0.168  | 1.7244 |
| 4/19/2019 22:00 | 0.6    | -0.1833 | 4.4522 | -0.6667 | 2.8143 | 31.4    | 0.1522 | 1.7087 |
| 4/19/2019 22:01 | 0.6    | -0.5083 | 4.517  | -0.3167 | 2.817  | 31.4    | 0.1667 | 1.745  |
| 4/19/2019 22:02 | 0.6    | -0.075  | 4.7345 | -0.0667 | 2.8155 | 31.3    | 0.1529 | 1.7533 |
| 4/19/2019 22:03 | 0.6    | -0.2917 | 4.9045 | -0.2    | 2.8158 | 31.2    | 0.1565 | 1.7658 |
| 4/19/2019 22:04 | 0.6    | -0.4083 | 4.5662 | -0.4333 | 2.8379 | 31.1091 | 0.1606 | 1.7493 |
| 4/19/2019 22:05 | 0.6    | 0       | 4.7273 | -0.35   | 2.8058 | 31.08   | 0.1519 | 1.7228 |
| 4/19/2019 22:06 | 0.6    | 0.55    | 4.6913 | 0.1667  | 2.7936 | 31.0583 | 0.1704 | 1.7255 |
| 4/19/2019 22:07 | 0.6    | -0.85   | 4.4646 | -0.5    | 2.7993 | 31.13   | 0.1569 | 1.7391 |
| 4/19/2019 22:08 | 0.6    | -0.55   | 4.6764 | -0.0667 | 2.7937 | 31.1583 | 0.1643 | 1.7113 |
| 4/19/2019 22:09 | 0.6    | -0.0333 | 4.8538 | -0.4167 | 2.795  | 31.2    | 0.1692 | 1.7039 |
| 4/19/2019 22:10 | 0.65   | -0.4917 | 4.7635 | 0.2833  | 2.7989 | 31.2    | 0.1551 | 1.7302 |
| 4/19/2019 22:11 | 0.65   | -0.375  | 4.4333 | -0.1667 | 2.798  | 31.1083 | 0.169  | 1.7413 |
| 4/19/2019 22:12 | 0.7    | -0.0417 | 4.5031 | -0.0667 | 2.7816 | 30.7091 | 0.1511 | 1.7113 |
| 4/19/2019 22:13 | 0.7    | -0.5083 | 4.8868 | -0.3667 | 2.7355 | 30.3833 | 0.1692 | 1.7343 |

|                 |        |         |        |         |        |         |        |        |
|-----------------|--------|---------|--------|---------|--------|---------|--------|--------|
| 4/19/2019 22:14 | 0.6833 | -0.225  | 4.7874 | -0.0333 | 2.7501 | 29.8273 | 0.1551 | 1.7374 |
| 4/19/2019 22:15 | 0.6167 | -0.8917 | 4.6603 | -0.45   | 2.7353 | 28.5    | 0.1625 | 1.7446 |
| 4/19/2019 22:16 | 0.7    | 0.575   | 4.4966 | -0.4    | 2.7335 | 27.0636 | 0.1655 | 1.7359 |
| 4/19/2019 22:17 | 0.7    | -0.525  | 4.5802 | -0.7667 | 2.7428 | 25.6333 | 0.1512 | 1.7295 |
| 4/19/2019 22:18 | 0.7    | 0.15    | 4.6737 | 0.0333  | 2.7558 | 24.6091 | 0.1662 | 1.72   |
| 4/19/2019 22:19 | 0.7    | -0.0667 | 4.7302 | 0.0167  | 2.7634 | 23.9    | 0.1457 | 1.7397 |
| 4/19/2019 22:20 | 0.7    | -0.625  | 4.6354 | -0.3    | 2.7421 | 23.3    | 0.1615 | 1.7448 |
| 4/19/2019 22:21 | 0.7    | -0.375  | 4.6976 | -0.0833 | 2.7343 | 21.9583 | 0.1623 | 1.7544 |
| 4/19/2019 22:22 | 0.6667 | 0.275   | 4.7095 | -0.25   | 2.7369 | 21.0091 | 0.1565 | 1.7625 |
| 4/19/2019 22:23 | 0.6167 | -0.2167 | 4.9299 | -0.4667 | 2.7581 | 20.5636 | 0.1576 | 1.7561 |
| 4/19/2019 22:24 | 0.65   | 0.0667  | 4.8338 | -0.3833 | 2.7544 | 20.3818 | 0.1502 | 1.7499 |
| 4/19/2019 22:25 | 0.7    | -0.4833 | 4.4819 | -0.8167 | 2.7368 | 20.1364 | 0.1643 | 1.7448 |
| 4/19/2019 22:26 | 0.7    | -0.2417 | 4.5148 | -0.4167 | 2.7367 | 20.1833 | 0.1512 | 1.7298 |
| 4/19/2019 22:27 | 0.7    | -0.1833 | 4.6282 | 0.1667  | 2.7274 | 20.9833 | 0.1596 | 1.7426 |
| 4/19/2019 22:28 | 0.7    | 0       | 4.5952 | -0.6667 | 2.7464 | 22.5546 | 0.1617 | 1.7413 |
| 4/19/2019 22:29 | 0.65   | 0.4667  | 4.8033 | -0.2667 | 2.7361 | 23.91   | 0.155  | 1.7361 |
| 4/19/2019 22:30 | 0.6083 | -0.075  | 4.5683 | -0.9    | 2.7468 | 25.0727 | 0.1641 | 1.7345 |
| 4/19/2019 22:31 | 0.7    | -0.3583 | 4.7317 | -0.45   | 2.7273 | 25.8182 | 0.141  | 1.7379 |
| 4/19/2019 22:32 | 0.725  | -0.15   | 4.4919 | -0.5167 | 2.7389 | 26.1636 | 0.1675 | 1.7368 |
| 4/19/2019 22:33 | 0.7    | 0.3667  | 4.8715 | 0.0167  | 2.7436 | 27.3455 | 0.1604 | 1.7526 |
| 4/19/2019 22:34 | 0.7    | -0.525  | 4.6843 | -0.0333 | 2.7328 | 28.5273 | 0.1561 | 1.771  |
| 4/19/2019 22:35 | 0.7    | -0.3083 | 4.4517 | -0.2833 | 2.7451 | 29.1    | 0.1719 | 1.78   |
| 4/19/2019 22:36 | 0.7    | 0.1667  | 4.6637 | -0.4167 | 2.7325 | 29.37   | 0.1491 | 1.7614 |
| 4/19/2019 22:37 | 0.7    | -0.2333 | 4.7342 | -0.6833 | 2.7238 | 29.525  | 0.1653 | 1.7308 |
| 4/19/2019 22:38 | 0.6833 | -0.65   | 4.7089 | -0.7    | 2.7308 | 29.44   | 0.1525 | 1.7321 |
| 4/19/2019 22:39 | 0.6833 | 0.1583  | 4.7835 | -0.4167 | 2.7423 | 29.2833 | 0.1628 | 1.7322 |
| 4/19/2019 22:40 | 0.7    | -0.2417 | 4.512  | -0.2    | 2.7402 | 29.3    | 0.1569 | 1.7518 |
| 4/19/2019 22:41 | 0.7    | -0.3417 | 4.5638 | -0.8167 | 2.7378 | 29.1333 | 0.1458 | 1.7511 |
| 4/19/2019 22:42 | 0.6583 | -0.3417 | 4.6593 | -0.1333 | 2.7409 | 28.6167 | 0.1662 | 1.756  |
| 4/19/2019 22:43 | 0.6333 | -0.25   | 4.7149 | -0.2    | 2.7329 | 28.1833 | 0.1522 | 1.7501 |
| 4/19/2019 22:44 | 0.7    | -0.475  | 4.6474 | -0.5    | 2.7486 | 27.5    | 0.1602 | 1.7704 |
| 4/19/2019 22:45 | 0.7333 | -0.7583 | 4.6949 | -0.2    | 2.7398 | 26.9667 | 0.1619 | 1.7603 |
| 4/19/2019 22:46 | 0.8    | -0.5167 | 4.6888 | -0.4833 | 2.7484 | 26.5182 | 0.155  | 1.7714 |
| 4/19/2019 22:47 | 0.8    | -0.25   | 4.4558 | -0.7333 | 2.7251 | 26.3636 | 0.1645 | 1.7585 |
| 4/19/2019 22:48 | 0.8    | -0.2667 | 4.5872 | 0.1     | 2.7367 | 26.2    | 0.1409 | 1.7479 |
| 4/19/2019 22:49 | 0.8    | 0.0417  | 4.6746 | -0.0333 | 2.7532 | 26.3833 | 0.1626 | 1.7597 |
| 4/19/2019 22:50 | 0.8    | -0.0917 | 4.7179 | 0.0333  | 2.7621 | 26.2556 | 0.1583 | 1.7574 |
| 4/19/2019 22:51 | 0.8    | -0.45   | 4.8492 | -0.2    | 2.7275 | 26.3917 | 0.1571 | 1.7507 |
| 4/19/2019 22:52 | 0.8    | 0.6     | 4.7453 | -0.3833 | 2.7153 | 26.2    | 0.1627 | 1.7478 |
| 4/19/2019 22:53 | 0.8    | 0.225   | 4.7307 | -0.25   | 2.7229 | 26.2    | 0.1491 | 1.76   |
| 4/19/2019 22:54 | 0.7917 | 0.3667  | 4.7083 | -0.2667 | 2.7293 | 26.6182 | 0.1602 | 1.7548 |
| 4/19/2019 22:55 | 0.7    | 0.2     | 4.7089 | -0.45   | 2.7383 | 26.9    | 0.1542 | 1.7143 |
| 4/19/2019 22:56 | 0.7333 | 0.0333  | 4.6312 | 0.1167  | 2.7515 | 27.3583 | 0.1553 | 1.7173 |
| 4/19/2019 22:57 | 0.8    | -0.1417 | 4.6263 | -0.75   | 2.7291 | 27.9273 | 0.1512 | 1.7294 |
| 4/19/2019 22:58 | 0.8    | -0.6333 | 4.483  | -0.0833 | 2.7276 | 28.425  | 0.1618 | 1.7551 |
| 4/19/2019 22:59 | 0.775  | -0.5333 | 4.8026 | -0.4667 | 2.7156 | 28.5364 | 0.1633 | 1.766  |
| 4/19/2019 23:00 | 0.7    | -0.2917 | 4.7693 | -0.5    | 2.7317 | 28.5455 | 0.1595 | 1.7652 |

|                 |        |         |        |         |        |         |        |        |
|-----------------|--------|---------|--------|---------|--------|---------|--------|--------|
| 4/19/2019 23:01 | 0.675  | -0.575  | 4.8136 | -0.3167 | 2.7116 | 28.4083 | 0.1608 | 1.784  |
| 4/19/2019 23:02 | 0.6    | -0.2583 | 4.7566 | -0.4    | 2.7271 | 28.7    | 0.1577 | 1.7709 |
| 4/19/2019 23:03 | 0.6833 | -0.6917 | 4.59   | -0.7833 | 2.6981 | 29.2917 | 0.1574 | 1.7635 |
| 4/19/2019 23:04 | 0.65   | -0.9417 | 4.8025 | -0.4333 | 2.7234 | 29.42   | 0.168  | 1.7597 |
| 4/19/2019 23:05 | 0.6583 | -0.0917 | 4.7407 | -0.0167 | 2.7087 | 29.3    | 0.1477 | 1.778  |
| 4/19/2019 23:06 | 0.6    | -0.775  | 4.3977 | -0.6333 | 2.7033 | 29.4    | 0.1612 | 1.7686 |
| 4/19/2019 23:07 | 0.6    | 0.1417  | 4.7723 | -0.6667 | 2.7093 | 29.4583 | 0.1486 | 1.7715 |
| 4/19/2019 23:08 | 0.65   | -0.0167 | 4.7832 | -0.3667 | 2.6962 | 29.52   | 0.1629 | 1.7648 |
| 4/19/2019 23:09 | 0.6167 | -0.6    | 4.6923 | -0.2167 | 2.7023 | 29.6    | 0.1651 | 1.7583 |
| 4/19/2019 23:10 | 0.6    | -0.0417 | 4.6977 | -0.0667 | 2.682  | 29.57   | 0.1495 | 1.7549 |
| 4/19/2019 23:11 | 0.6    | -0.5917 | 4.8155 | -0.3    | 2.6879 | 29.5333 | 0.1656 | 1.7417 |
| 4/19/2019 23:12 | 0.6    | -0.075  | 4.7467 | -0.1667 | 2.687  | 29.625  | 0.1473 | 1.731  |
| 4/19/2019 23:13 | 0.6    | -0.3167 | 4.6255 | -0.5167 | 2.6815 | 29.8083 | 0.1636 | 1.7396 |
| 4/19/2019 23:14 | 0.6    | -0.3167 | 4.8425 | -0.3667 | 2.6665 | 29.9    | 0.1555 | 1.7373 |
| 4/19/2019 23:15 | 0.6    | -0.2417 | 4.7597 | -0.65   | 2.6423 | 29.8727 | 0.1605 | 1.7433 |
| 4/19/2019 23:16 | 0.6    | 0.0667  | 4.6342 | -0.15   | 2.6384 | 29.975  | 0.16   | 1.7222 |
| 4/19/2019 23:17 | 0.6    | -1.1167 | 4.6705 | -0.5667 | 2.6288 | 30.3    | 0.1489 | 1.7746 |
| 4/19/2019 23:18 | 0.6333 | -0.325  | 4.7947 | -0.2833 | 2.6449 | 30.3    | 0.1645 | 1.7641 |
| 4/19/2019 23:19 | 0.7    | -0.1583 | 4.6958 | -0.0333 | 2.6363 | 30.325  | 0.1461 | 1.7467 |
| 4/19/2019 23:20 | 0.6083 | 0.1     | 4.9817 | -0.7    | 2.6352 | 30.4417 | 0.1421 | 1.7324 |
| 4/19/2019 23:21 | 0.6    | -0.2917 | 4.9643 | 0.0667  | 2.6404 | 30.5273 | 0.1641 | 1.7449 |
| 4/19/2019 23:22 | 0.6    | 0.0833  | 4.8465 | -0.3    | 2.6568 | 30.5917 | 0.1327 | 1.7603 |
| 4/19/2019 23:23 | 0.6    | -0.7833 | 4.8322 | -0.25   | 2.6578 | 30.5417 | 0.1556 | 1.742  |
| 4/19/2019 23:24 | 0.6    | 0.3083  | 4.7013 | -0.3833 | 2.6354 | 30.65   | 0.1487 | 1.7313 |
| 4/19/2019 23:25 | 0.6    | 0.1083  | 4.829  | 0.1833  | 2.6336 | 30.6727 | 0.1511 | 1.7661 |
| 4/19/2019 23:26 | 0.6583 | 0.2083  | 4.8817 | -0.45   | 2.6514 | 30.8    | 0.1464 | 1.7735 |
| 4/19/2019 23:27 | 0.625  | -0.4333 | 4.6567 | -0.4333 | 2.6255 | 30.8    | 0.1405 | 1.7534 |
| 4/19/2019 23:28 | 0.6    | 0.0333  | 4.7317 | 0.0667  | 2.6495 | 30.8091 | 0.1595 | 1.7541 |
| 4/19/2019 23:29 | 0.6    | -0.2167 | 4.7375 | -0.6667 | 2.6263 | 30.9    | 0.1484 | 1.7579 |
| 4/19/2019 23:30 | 0.6    | 0.0917  | 4.7507 | 0.3333  | 2.6333 | 30.9    | 0.1519 | 1.7374 |
| 4/19/2019 23:31 | 0.6    | -0.2333 | 4.5145 | -0.4333 | 2.6282 | 30.9    | 0.1588 | 1.7199 |
| 4/19/2019 23:32 | 0.6917 | -0.1083 | 4.835  | -0.1333 | 2.648  | 30.99   | 0.1431 | 1.7468 |
| 4/19/2019 23:33 | 0.7    | -0.075  | 4.8333 | -0.35   | 2.6365 | 31      | 0.164  | 1.7668 |
| 4/19/2019 23:34 | 0.7    | -0.9583 | 4.727  | -0.1333 | 2.6259 | 31.02   | 0.1349 | 1.7672 |
| 4/19/2019 23:35 | 0.7    | -0.1    | 4.7807 | -0.3667 | 2.6233 | 31.0583 | 0.1601 | 1.7648 |
| 4/19/2019 23:36 | 0.7    | 0.0083  | 4.8835 | 0.1167  | 2.6278 | 31.0818 | 0.1617 | 1.7727 |
| 4/19/2019 23:37 | 0.6417 | -0.1    | 4.6098 | -0.4167 | 2.6449 | 31.1667 | 0.149  | 1.776  |
| 4/19/2019 23:38 | 0.675  | 0.1833  | 4.6572 | -0.25   | 2.6013 | 31.2273 | 0.1589 | 1.7807 |
| 4/19/2019 23:39 | 0.7    | -0.3333 | 4.4382 | -0.45   | 2.5913 | 31.35   | 0.143  | 1.7673 |
| 4/19/2019 23:40 | 0.7    | -0.5    | 4.966  | 0.0167  | 2.6188 | 31.2546 | 0.139  | 1.7868 |
| 4/19/2019 23:41 | 0.625  | 0.3167  | 5.1808 | -0.3833 | 2.6297 | 31.175  | 0.1557 | 1.7915 |
| 4/19/2019 23:42 | 0.6    | 0.1083  | 4.7828 | -0.2833 | 2.6146 | 30.9182 | 0.1351 | 1.7583 |
| 4/19/2019 23:43 | 0.6    | -0.65   | 4.8232 | 0.1667  | 2.6155 | 30.8818 | 0.1605 | 1.7524 |
| 4/19/2019 23:44 | 0.6182 | -0.4917 | 4.4705 | -0.0333 | 2.621  | 30.8    | 0.1509 | 1.7467 |
| 4/19/2019 23:45 | 0.6    | -0.2    | 4.5828 | -0.3333 | 2.6212 | 30.8727 | 0.1621 | 1.7706 |
| 4/19/2019 23:46 | 0.6    | 0.1     | 4.8432 | -0.3667 | 2.6022 | 30.8364 | 0.1479 | 1.7678 |
| 4/19/2019 23:47 | 0.6583 | -0.3333 | 4.8613 | -0.45   | 2.6081 | 30.8    | 0.15   | 1.7842 |

|                 |        |         |        |         |        |         |        |        |
|-----------------|--------|---------|--------|---------|--------|---------|--------|--------|
| 4/19/2019 23:48 | 0.7    | -0.1917 | 5.1363 | 0.1833  | 2.6043 | 30.8    | 0.159  | 1.7778 |
| 4/19/2019 23:49 | 0.7    | 0.0167  | 4.8217 | -0.55   | 2.594  | 30.8    | 0.1283 | 1.7751 |
| 4/19/2019 23:50 | 0.6417 | -0.3083 | 4.4785 | -0.5167 | 2.5943 | 30.8    | 0.155  | 1.7797 |
| 4/19/2019 23:51 | 0.6    | -0.3917 | 4.7963 | -0.3    | 2.5988 | 30.73   | 0.1555 | 1.7711 |
| 4/19/2019 23:52 | 0.55   | -0.2833 | 4.7752 | -0.1333 | 2.5967 | 30.7273 | 0.1483 | 1.7463 |
| 4/19/2019 23:53 | 0.6    | -0.625  | 4.8735 | -0.9333 | 2.5861 | 30.7    | 0.1682 | 1.7643 |
| 4/19/2019 23:54 | 0.6    | 0.8333  | 4.8198 | -1.1667 | 2.5835 | 30.8    | 0.1374 | 1.7521 |
| 4/19/2019 23:55 | 0.6    | 0.975   | 4.614  | -0.3833 | 2.5909 | 30.9818 | 0.1532 | 1.7552 |
| 4/19/2019 23:56 | 0.6    | -0.55   | 4.6958 | -0.95   | 2.5864 | 31.0273 | 0.1502 | 1.7824 |
| 4/19/2019 23:57 | 0.6167 | -0.1083 | 4.6538 | -0.5    | 2.5878 | 30.85   | 0.1506 | 1.7224 |
| 4/19/2019 23:58 | 0.7    | 0.0833  | 4.623  | -0.4667 | 2.5755 | 30.8    | 0.1606 | 1.728  |
| 4/19/2019 23:59 | 0.7417 | -0.3083 | 5.3715 | -0.3667 | 2.5741 | 30.8818 | 0.1442 | 1.712  |
| 4/20/2019 0:00  | 0.8    | -0.5667 | 4.934  | -0.5667 | 2.5748 | 30.9    | 0.1602 | 1.7153 |
| 4/20/2019 0:01  | 0.8    | -0.875  | 4.8057 | -0.4333 | 2.5662 | 30.9    | 0.1398 | 1.7439 |
| 4/20/2019 0:02  | 0.775  | 0.275   | 4.638  | -0.45   | 2.5724 | 30.8182 | 0.1476 | 1.7565 |
| 4/20/2019 0:03  | 0.7083 | -0.15   | 4.907  | 0.0667  | 2.568  | 30.8    | 0.153  | 1.7474 |
| 4/20/2019 0:04  | 0.7    | -0.2667 | 4.811  | -0.2833 | 2.5575 | 30.8    | 0.1392 | 1.7548 |
| 4/20/2019 0:05  | 0.7    | -0.475  | 4.9973 | -0.2167 | 2.5638 | 30.8636 | 0.1547 | 1.778  |
| 4/20/2019 0:06  | 0.7083 | -0.2167 | 4.9962 | -0.4833 | 2.5615 | 30.925  | 0.1512 | 1.7459 |
| 4/20/2019 0:07  | 0.7    | -0.2583 | 4.817  | -0.1167 | 2.5638 | 30.7546 | 0.1537 | 1.754  |
| 4/20/2019 0:08  | 0.7917 | -0.0333 | 4.9417 | -0.0667 | 2.5573 | 30.6    | 0.1598 | 1.7546 |
| 4/20/2019 0:09  | 0.8    | 0.3833  | 4.7918 | -0.2833 | 2.5453 | 30.6818 | 0.1414 | 1.7358 |
| 4/20/2019 0:10  | 0.8    | 0.125   | 4.7503 | -0.0833 | 2.5403 | 30.7    | 0.1598 | 1.7404 |
| 4/20/2019 0:11  | 0.8    | -0.3667 | 4.8527 | -0.1167 | 2.5447 | 30.7    | 0.1439 | 1.7389 |
| 4/20/2019 0:12  | 0.8    | -0.5    | 4.771  | 0.2333  | 2.5421 | 30.6667 | 0.1587 | 1.7503 |
| 4/20/2019 0:13  | 0.8    | -0.75   | 4.9197 | -0.1333 | 2.547  | 30.6    | 0.1485 | 1.7331 |
| 4/20/2019 0:14  | 0.8    | -0.3083 | 4.9152 | -0.45   | 2.5468 | 30.6    | 0.1487 | 1.7602 |
| 4/20/2019 0:15  | 0.8    | -0.225  | 5.0092 | -0.3167 | 2.508  | 30.7    | 0.1479 | 1.7603 |
| 4/20/2019 0:16  | 0.7    | -0.1667 | 4.8288 | -0.1333 | 2.4701 | 30.7    | 0.1401 | 1.7553 |
| 4/20/2019 0:17  | 0.7833 | -0.6    | 4.8538 | -0.9167 | 2.4643 | 30.7917 | 0.152  | 1.7483 |
| 4/20/2019 0:18  | 0.8    | -0.3    | 4.9397 | -0.65   | 2.4773 | 30.8    | 0.1388 | 1.7571 |
| 4/20/2019 0:19  | 0.8    | -1.35   | 4.7623 | -0.3167 | 2.4765 | 30.8546 | 0.1578 | 1.7644 |
| 4/20/2019 0:20  | 0.8    | -0.55   | 4.6937 | -0.5167 | 2.4688 | 30.9917 | 0.1515 | 1.7523 |
| 4/20/2019 0:21  | 0.8    | -0.0667 | 4.9242 | -0.5833 | 2.4783 | 31      | 0.1477 | 1.7523 |
| 4/20/2019 0:22  | 0.8    | -0.3833 | 4.7695 | -0.75   | 2.4813 | 31.0455 | 0.1603 | 1.7173 |
| 4/20/2019 0:23  | 0.8    | 0.3833  | 4.8695 | -0.8833 | 2.4845 | 31      | 0.1418 | 1.7224 |
| 4/20/2019 0:24  | 0.8    | -0.125  | 4.9103 | 0       | 2.4666 | 31      | 0.1419 | 1.7653 |
| 4/20/2019 0:25  | 0.8    | 0.0167  | 4.8813 | -0.1667 | 2.4871 | 31.1    | 0.1576 | 1.7587 |
| 4/20/2019 0:26  | 0.8    | 0.1     | 5.0583 | -0.5333 | 2.4805 | 31.1    | 0.1359 | 1.753  |
| 4/20/2019 0:27  | 0.8    | -0.0083 | 4.588  | -0.8    | 2.4838 | 31.1727 | 0.1568 | 1.7549 |
| 4/20/2019 0:28  | 0.7833 | -0.1917 | 4.6028 | 0.15    | 2.4638 | 31.125  | 0.1459 | 1.7536 |
| 4/20/2019 0:29  | 0.7333 | -0.2333 | 4.4297 | -0.3    | 2.4572 | 31.1273 | 0.1531 | 1.7667 |
| 4/20/2019 0:30  | 0.7    | -0.2    | 4.7068 | -0.75   | 2.4513 | 31.0833 | 0.1572 | 1.761  |
| 4/20/2019 0:31  | 0.7    | 0.0667  | 4.371  | -0.2167 | 2.4745 | 31.0917 | 0.1421 | 1.7677 |
| 4/20/2019 0:32  | 0.6583 | -0.075  | 4.826  | 0.1     | 2.4383 | 31.1    | 0.1566 | 1.784  |
| 4/20/2019 0:33  | 0.6    | 0.0167  | 4.6718 | -0.2667 | 2.4626 | 31.1    | 0.15   | 1.7672 |
| 4/20/2019 0:34  | 0.6    | -0.2083 | 4.5513 | -0.0667 | 2.4821 | 31.0273 | 0.1575 | 1.7319 |

|                |        |         |        |         |        |         |        |        |
|----------------|--------|---------|--------|---------|--------|---------|--------|--------|
| 4/20/2019 0:35 | 0.5083 | -0.3583 | 4.6938 | -0.05   | 2.4841 | 31.04   | 0.1497 | 1.7316 |
| 4/20/2019 0:36 | 0.5    | 0.1167  | 4.5878 | -0.5833 | 2.4731 | 31      | 0.1431 | 1.7553 |
| 4/20/2019 0:37 | 0.5167 | -0.4333 | 4.8979 | -0.2333 | 2.4596 | 30.9636 | 0.1541 | 1.7734 |
| 4/20/2019 0:38 | 0.6    | -0.4333 | 4.6313 | -0.5833 | 2.454  | 30.8417 | 0.1463 | 1.7704 |
| 4/20/2019 0:39 | 0.6583 | -0.25   | 4.8595 | -0.45   | 2.4668 | 30.8    | 0.1537 | 1.7718 |
| 4/20/2019 0:40 | 0.7    | -0.15   | 4.6833 | -0.5    | 2.4538 | 30.8    | 0.1518 | 1.7888 |
| 4/20/2019 0:41 | 0.7    | -0.2417 | 4.9913 | -0.4833 | 2.4754 | 30.8    | 0.1466 | 1.7869 |
| 4/20/2019 0:42 | 0.6333 | -0.025  | 4.7266 | -0.5667 | 2.459  | 30.8    | 0.1586 | 1.7791 |
| 4/20/2019 0:43 | 0.6    | 0.4333  | 4.815  | -0.5667 | 2.4786 | 30.8182 | 0.1372 | 1.7684 |
| 4/20/2019 0:44 | 0.55   | -0.4    | 4.9398 | -0.5    | 2.4495 | 30.9    | 0.1592 | 1.7846 |
| 4/20/2019 0:45 | 0.6    | -1.2333 | 4.555  | -0.4833 | 2.4569 | 30.93   | 0.1363 | 1.7765 |
| 4/20/2019 0:46 | 0.6917 | 0.1667  | 4.6454 | -0.25   | 2.4507 | 30.9727 | 0.1579 | 1.7504 |
| 4/20/2019 0:47 | 0.7    | 0.1833  | 4.9168 | -0.5167 | 2.4693 | 31      | 0.1484 | 1.744  |
| 4/20/2019 0:48 | 0.7    | -0.1583 | 4.3504 | -0.0667 | 2.4558 | 30.9727 | 0.1497 | 1.7364 |
| 4/20/2019 0:49 | 0.7    | -0.275  | 4.5993 | 0.1667  | 2.4598 | 31.0455 | 0.1515 | 1.7453 |
| 4/20/2019 0:50 | 0.7167 | -0.7583 | 4.5878 | -0.4667 | 2.4571 | 31.1545 | 0.1367 | 1.7722 |
| 4/20/2019 0:51 | 0.8    | -0.2083 | 4.7464 | -0.55   | 2.4439 | 31.2364 | 0.1415 | 1.7608 |
| 4/20/2019 0:52 | 0.8    | -0.5917 | 4.7413 | -0.85   | 2.4439 | 31.3    | 0.1507 | 1.7399 |
| 4/20/2019 0:53 | 0.8    | 0.15    | 4.8218 | -0.6167 | 2.4471 | 31.3    | 0.1479 | 1.7425 |
| 4/20/2019 0:54 | 0.8    | 0.3417  | 4.8918 | -0.2167 | 2.44   | 31.37   | 0.1635 | 1.7701 |
| 4/20/2019 0:55 | 0.8    | 0.425   | 4.8504 | 0.1     | 2.4278 | 31.3417 | 0.1385 | 1.7692 |
| 4/20/2019 0:56 | 0.8    | -0.0333 | 4.8066 | -0.1833 | 2.4309 | 31.28   | 0.1582 | 1.7728 |
| 4/20/2019 0:57 | 0.7667 | 0.3667  | 4.6255 | -0.6167 | 2.4316 | 31.1083 | 0.1461 | 1.7613 |
| 4/20/2019 0:58 | 0.7    | -0.9667 | 4.9547 | -0.1667 | 2.4206 | 31.0546 | 0.1482 | 1.7364 |
| 4/20/2019 0:59 | 0.7    | -0.1833 | 5.0083 | -0.3833 | 2.4414 | 30.8182 | 0.1493 | 1.7523 |
| 4/20/2019 1:00 | 0.7    | -0.6417 | 4.894  | -0.1    | 2.4226 | 30.87   | 0.1438 | 1.7532 |
| 4/20/2019 1:01 | 0.7    | -0.375  | 4.6827 | -0.0667 | 2.4375 | 30.8455 | 0.1487 | 1.7557 |
| 4/20/2019 1:02 | 0.7    | -0.3333 | 4.6195 | -0.6833 | 2.4336 | 30.8    | 0.1384 | 1.7511 |
| 4/20/2019 1:03 | 0.7    | 0.0833  | 4.8688 | -0.6667 | 2.4045 | 30.8    | 0.1493 | 1.7545 |
| 4/20/2019 1:04 | 0.7    | 0.1333  | 4.7174 | -0.6667 | 2.4306 | 30.7444 | 0.1424 | 1.7665 |
| 4/20/2019 1:05 | 0.7    | -0.325  | 4.8623 | -0.7    | 2.4216 | 30.7    | 0.1408 | 1.7541 |
| 4/20/2019 1:06 | 0.6083 | -0.4667 | 4.6765 | -0.1667 | 2.4114 | 30.7    | 0.1564 | 1.747  |
| 4/20/2019 1:07 | 0.6    | -0.3833 | 4.8596 | -0.55   | 2.3899 | 30.7636 | 0.1404 | 1.7523 |
| 4/20/2019 1:08 | 0.5917 | -0.05   | 4.6758 | -0.2333 | 2.3799 | 30.8    | 0.1546 | 1.7574 |
| 4/20/2019 1:09 | 0.5083 | -0.225  | 4.5958 | -0.65   | 2.4052 | 30.8833 | 0.1456 | 1.7711 |
| 4/20/2019 1:10 | 0.5    | -0.375  | 4.8999 | -0.6    | 2.4222 | 30.9636 | 0.1424 | 1.7763 |
| 4/20/2019 1:11 | 0.5    | -0.2833 | 4.79   | -0.1167 | 2.4184 | 31.1818 | 0.1534 | 1.7759 |
| 4/20/2019 1:12 | 0.6    | -0.1833 | 4.6395 | -0.4833 | 2.3953 | 31.2    | 0.1374 | 1.8021 |
| 4/20/2019 1:13 | 0.6    | -0.3917 | 4.6073 | -0.7167 | 2.4174 | 31.2    | 0.1479 | 1.7841 |
| 4/20/2019 1:14 | 0.6    | 0.3583  | 4.6284 | -0.6167 | 2.423  | 31.2    | 0.135  | 1.7808 |
| 4/20/2019 1:15 | 0.6    | -0.2583 | 4.8074 | -1      | 2.4231 | 31.2    | 0.156  | 1.7646 |
| 4/20/2019 1:16 | 0.6    | -0.5167 | 4.6251 | -0.6667 | 2.3769 | 31.2    | 0.1506 | 1.7593 |
| 4/20/2019 1:17 | 0.6    | -0.0333 | 4.7127 | -0.8    | 2.3414 | 31.1545 | 0.1372 | 1.782  |
| 4/20/2019 1:18 | 0.6    | -0.4167 | 4.5861 | -0.1167 | 2.3578 | 31.1    | 0.1583 | 1.7828 |
| 4/20/2019 1:19 | 0.6583 | -0.4333 | 4.8435 | -0.35   | 2.3482 | 31.1    | 0.1311 | 1.7904 |
| 4/20/2019 1:20 | 0.7    | -0.6917 | 4.7719 | -0.3833 | 2.3597 | 31.1    | 0.1519 | 1.7738 |
| 4/20/2019 1:21 | 0.7    | -0.125  | 4.7083 | 0.2667  | 2.3679 | 31.1    | 0.1362 | 1.7945 |

|                |        |         |        |         |        |         |        |        |
|----------------|--------|---------|--------|---------|--------|---------|--------|--------|
| 4/20/2019 1:22 | 0.7    | -0.0917 | 4.9119 | -0.55   | 2.3676 | 31.1    | 0.1472 | 1.7582 |
| 4/20/2019 1:23 | 0.7    | 0.2833  | 4.5927 | 0.0833  | 2.3396 | 31.1    | 0.1526 | 1.7679 |
| 4/20/2019 1:24 | 0.7    | -0.975  | 4.4653 | 0.25    | 2.3563 | 31.17   | 0.1368 | 1.786  |
| 4/20/2019 1:25 | 0.7    | 0.0833  | 4.9021 | -0.1667 | 2.3498 | 31.1818 | 0.1496 | 1.8024 |
| 4/20/2019 1:26 | 0.7    | -0.175  | 4.7293 | -0.45   | 2.3496 | 31.2    | 0.1372 | 1.7798 |
| 4/20/2019 1:27 | 0.7    | -0.6917 | 4.6362 | -0.1167 | 2.3441 | 31.21   | 0.1555 | 1.771  |
| 4/20/2019 1:28 | 0.7    | -0.3417 | 4.753  | -0.5667 | 2.3331 | 31.2333 | 0.1482 | 1.786  |
| 4/20/2019 1:29 | 0.7    | -0.15   | 4.9243 | -0.2333 | 2.3368 | 31.2583 | 0.145  | 1.7913 |
| 4/20/2019 1:30 | 0.7    | 0.8     | 4.839  | -0.1    | 2.3388 | 31.4    | 0.1511 | 1.7837 |
| 4/20/2019 1:31 | 0.65   | 0.125   | 4.7509 | -0.15   | 2.3333 | 31.4    | 0.1383 | 1.7862 |
| 4/20/2019 1:32 | 0.6    | -0.9    | 4.8208 | -0.7333 | 2.335  | 31.4    | 0.1531 | 1.8117 |
| 4/20/2019 1:33 | 0.6    | 0.525   | 4.7502 | -0.4667 | 2.3002 | 31.4    | 0.1402 | 1.7898 |
| 4/20/2019 1:34 | 0.6    | -0.0917 | 4.7297 | -0.7    | 2.3234 | 31.4    | 0.148  | 1.7821 |
| 4/20/2019 1:35 | 0.6    | -0.0667 | 4.7582 | -0.7833 | 2.3172 | 31.32   | 0.1464 | 1.7784 |
| 4/20/2019 1:36 | 0.5333 | 0.1333  | 4.7846 | -0.3833 | 2.3143 | 31.3    | 0.1526 | 1.7922 |
| 4/20/2019 1:37 | 0.5    | 0.075   | 4.7798 | -0.6333 | 2.338  | 31.3    | 0.1542 | 1.7883 |
| 4/20/2019 1:38 | 0.4417 | -0.3667 | 4.9029 | -0.5833 | 2.3467 | 31.4    | 0.1396 | 1.7549 |
| 4/20/2019 1:39 | 0.4333 | -0.25   | 4.9177 | -0.25   | 2.3426 | 31.3546 | 0.1577 | 1.7683 |
| 4/20/2019 1:40 | 0.5    | 0.075   | 4.8239 | -0.45   | 2.3019 | 31.3    | 0.1383 | 1.7797 |
| 4/20/2019 1:41 | 0.55   | -0.3833 | 4.7014 | -0.45   | 2.326  | 31.3    | 0.148  | 1.7982 |
| 4/20/2019 1:42 | 0.6    | 0.825   | 4.5472 | -0.6167 | 2.329  | 31.3    | 0.1566 | 1.799  |
| 4/20/2019 1:43 | 0.6    | 0.0167  | 4.6651 | 0.1167  | 2.3357 | 31.3    | 0.1321 | 1.7985 |
| 4/20/2019 1:44 | 0.6    | -0.0333 | 4.7233 | -0.5333 | 2.3191 | 31.3    | 0.1469 | 1.8043 |
| 4/20/2019 1:45 | 0.6    | 0.4667  | 4.7713 | 0.0833  | 2.2958 | 31.3    | 0.1415 | 1.7809 |
| 4/20/2019 1:46 | 0.5333 | -0.05   | 4.9492 | -0.75   | 2.3204 | 31.4    | 0.1578 | 1.7949 |
| 4/20/2019 1:47 | 0.5333 | 0.0167  | 4.8378 | -0.4    | 2.3008 | 31.4    | 0.1425 | 1.8029 |
| 4/20/2019 1:48 | 0.525  | 0.2667  | 4.9386 | -0.1667 | 2.3401 | 31.4    | 0.1448 | 1.8032 |
| 4/20/2019 1:49 | 0.6    | -0.775  | 4.7453 | -0.5167 | 2.3116 | 31.3167 | 0.1503 | 1.783  |
| 4/20/2019 1:50 | 0.625  | 0.5917  | 4.7768 | -0.0833 | 2.3144 | 31.3    | 0.1432 | 1.7358 |
| 4/20/2019 1:51 | 0.7    | -0.0583 | 4.7734 | -0.4833 | 2.3238 | 31.3    | 0.1498 | 1.7342 |
| 4/20/2019 1:52 | 0.7    | 0.7583  | 4.7963 | -0.75   | 2.3128 | 31.37   | 0.138  | 1.7832 |
| 4/20/2019 1:53 | 0.7    | -0.575  | 4.6481 | -0.7    | 2.3109 | 31.4    | 0.1506 | 1.7853 |
| 4/20/2019 1:54 | 0.7    | -0.2417 | 4.5284 | -0.5667 | 2.3043 | 31.4    | 0.1408 | 1.7689 |
| 4/20/2019 1:55 | 0.725  | -0.2583 | 4.7534 | -0.6    | 2.3041 | 31.4    | 0.1407 | 1.7623 |
| 4/20/2019 1:56 | 0.7    | -0.675  | 4.8474 | -0.6833 | 2.3123 | 31.3455 | 0.1504 | 1.8063 |
| 4/20/2019 1:57 | 0.7    | -0.5667 | 4.9059 | -0.6167 | 2.3114 | 31.3    | 0.1397 | 1.7997 |
| 4/20/2019 1:58 | 0.7333 | -0.2167 | 4.8242 | -0.6167 | 2.2931 | 31.3    | 0.1548 | 1.7683 |
| 4/20/2019 1:59 | 0.8    | -0.25   | 4.997  | -0.1333 | 2.3018 | 31.2727 | 0.1454 | 1.7683 |
| 4/20/2019 2:00 | 0.8    | -0.0417 | 4.6587 | -0.75   | 2.3041 | 31.2091 | 0.1484 | 1.7827 |
| 4/20/2019 2:01 | 0.8    | 0.175   | 4.6768 | -0.2833 | 2.2991 | 31.3    | 0.149  | 1.7826 |
| 4/20/2019 2:02 | 0.8    | -0.5417 | 4.886  | -0.8667 | 2.2973 | 31.3    | 0.1399 | 1.7968 |
| 4/20/2019 2:03 | 0.8    | 0.6083  | 4.9414 | -0.1833 | 2.2978 | 31.3    | 0.1548 | 1.7779 |
| 4/20/2019 2:04 | 0.8    | -0.3333 | 4.8467 | 0.0833  | 2.2917 | 31.28   | 0.1421 | 1.7897 |
| 4/20/2019 2:05 | 0.8167 | -0.775  | 4.8282 | -0.5833 | 2.276  | 31.26   | 0.1526 | 1.797  |
| 4/20/2019 2:06 | 0.8    | -0.175  | 4.7805 | -0.2333 | 2.3146 | 31.15   | 0.1314 | 1.7499 |
| 4/20/2019 2:07 | 0.775  | 0.2083  | 4.9202 | -0.5667 | 2.2932 | 31.1    | 0.1458 | 1.7492 |
| 4/20/2019 2:08 | 0.7167 | -0.025  | 4.8398 | -0.2333 | 2.2869 | 31.1    | 0.145  | 1.7513 |

|                |        |         |        |         |        |         |        |        |
|----------------|--------|---------|--------|---------|--------|---------|--------|--------|
| 4/20/2019 2:09 | 0.7    | 0.1     | 4.7377 | -0.1667 | 2.32   | 31.19   | 0.1406 | 1.7735 |
| 4/20/2019 2:10 | 0.7    | -0.7333 | 5.0572 | -0.6    | 2.2913 | 31.2    | 0.1567 | 1.82   |
| 4/20/2019 2:11 | 0.7    | -0.525  | 4.793  | -0.1667 | 2.3008 | 31.2    | 0.1396 | 1.8178 |
| 4/20/2019 2:12 | 0.7    | 0.25    | 5.1022 | -0.8667 | 2.2971 | 31.2    | 0.1538 | 1.8151 |
| 4/20/2019 2:13 | 0.7    | -0.725  | 4.7167 | -0.3167 | 2.2818 | 31.1727 | 0.143  | 1.7785 |
| 4/20/2019 2:14 | 0.7833 | 0.1167  | 4.771  | -0.2667 | 2.2738 | 31.2    | 0.1389 | 1.8057 |
| 4/20/2019 2:15 | 0.8    | -0.2167 | 5.0543 | -0.4333 | 2.263  | 31.2    | 0.1518 | 1.7907 |
| 4/20/2019 2:16 | 0.8    | -0.4833 | 4.535  | -0.5833 | 2.2631 | 31.1333 | 0.1375 | 1.7792 |
| 4/20/2019 2:17 | 0.7    | -0.4167 | 4.7757 | -0.2667 | 2.2456 | 31.1364 | 0.152  | 1.808  |
| 4/20/2019 2:18 | 0.6    | -0.425  | 4.6213 | -0.0833 | 2.2768 | 31.1818 | 0.1403 | 1.7999 |
| 4/20/2019 2:19 | 0.575  | -0.1417 | 4.8512 | -0.4167 | 2.2673 | 31.2    | 0.1508 | 1.7683 |
| 4/20/2019 2:20 | 0.525  | 0.4583  | 4.5127 | -0.45   | 2.2796 | 31.2    | 0.1484 | 1.7543 |
| 4/20/2019 2:21 | 0.6    | 0.05    | 4.8043 | 0       | 2.2523 | 31.1    | 0.1316 | 1.7807 |
| 4/20/2019 2:22 | 0.5833 | -0.6833 | 4.7605 | -0.5    | 2.2599 | 31.09   | 0.1458 | 1.7826 |
| 4/20/2019 2:23 | 0.6    | -0.3667 | 4.6238 | -0.7333 | 2.2859 | 31.0636 | 0.1437 | 1.7869 |
| 4/20/2019 2:24 | 0.6    | -0.025  | 4.5497 | -0.5167 | 2.2894 | 31.1    | 0.1449 | 1.7696 |
| 4/20/2019 2:25 | 0.5917 | -0.5417 | 4.73   | -0.3833 | 2.2847 | 31.1273 | 0.1506 | 1.7845 |
| 4/20/2019 2:26 | 0.5833 | 0.3     | 4.7008 | -0.3167 | 2.2575 | 31.1273 | 0.1303 | 1.788  |
| 4/20/2019 2:27 | 0.6    | 0.0083  | 4.7657 | -0.5    | 2.2845 | 31      | 0.1489 | 1.7731 |
| 4/20/2019 2:28 | 0.6    | 0.025   | 4.7323 | -0.8333 | 2.2692 | 31      | 0.1394 | 1.7583 |
| 4/20/2019 2:29 | 0.6667 | -0.6333 | 4.6825 | -0.7667 | 2.247  | 30.93   | 0.1472 | 1.7808 |
| 4/20/2019 2:30 | 0.6083 | -0.2667 | 4.8313 | -0.1667 | 2.277  | 30.9    | 0.1415 | 1.771  |
| 4/20/2019 2:31 | 0.7    | -0.65   | 5.029  | -0.6333 | 2.2488 | 30.9    | 0.1428 | 1.7878 |
| 4/20/2019 2:32 | 0.6833 | -0.0167 | 4.6187 | -0.6167 | 2.2478 | 30.9    | 0.1521 | 1.7732 |
| 4/20/2019 2:33 | 0.7    | 0.2833  | 4.4985 | -0.2    | 2.2539 | 30.9    | 0.1339 | 1.7723 |
| 4/20/2019 2:34 | 0.6917 | 0.1     | 4.6152 | -0.3167 | 2.2541 | 30.9    | 0.1503 | 1.7803 |
| 4/20/2019 2:35 | 0.7    | -0.2167 | 4.5842 | -0.5333 | 2.2449 | 30.96   | 0.1373 | 1.7854 |
| 4/20/2019 2:36 | 0.7    | -0.175  | 4.7172 | -0.4167 | 2.2408 | 30.975  | 0.1399 | 1.7503 |
| 4/20/2019 2:37 | 0.7    | -0.575  | 4.7085 | -0.05   | 2.2558 | 31      | 0.1401 | 1.7551 |
| 4/20/2019 2:38 | 0.7    | -0.2333 | 4.6305 | -0.6833 | 2.2487 | 31.02   | 0.1395 | 1.7493 |
| 4/20/2019 2:39 | 0.7333 | -0.6417 | 4.6433 | -0.3    | 2.2653 | 31.0455 | 0.1496 | 1.7642 |
| 4/20/2019 2:40 | 0.8    | -0.2333 | 4.8332 | 0.5     | 2.2727 | 31      | 0.134  | 1.7391 |
| 4/20/2019 2:41 | 0.8    | -0.2667 | 4.9257 | -0.6833 | 2.248  | 31.0818 | 0.1536 | 1.7252 |
| 4/20/2019 2:42 | 0.7833 | -0.0583 | 5.03   | -0.4167 | 2.2428 | 31.0818 | 0.1422 | 1.7701 |
| 4/20/2019 2:43 | 0.7333 | 0.0083  | 4.8373 | -0.2333 | 2.2433 | 30.9273 | 0.138  | 1.7774 |
| 4/20/2019 2:44 | 0.7083 | 0.1417  | 4.6483 | -0.6667 | 2.248  | 30.9    | 0.143  | 1.7546 |
| 4/20/2019 2:45 | 0.7167 | 0.4917  | 4.6593 | -0.1833 | 2.2448 | 30.9    | 0.1392 | 1.7478 |
| 4/20/2019 2:46 | 0.7    | 0       | 4.7703 | -0.6667 | 2.2518 | 30.8778 | 0.144  | 1.7806 |
| 4/20/2019 2:47 | 0.7    | -0.7917 | 4.8842 | -1.15   | 2.2343 | 30.8364 | 0.1352 | 1.788  |
| 4/20/2019 2:48 | 0.7    | 0.15    | 4.7238 | -0.5333 | 2.2623 | 30.82   | 0.1455 | 1.7815 |
| 4/20/2019 2:49 | 0.7    | -0.8    | 4.5577 | -0.05   | 2.2417 | 30.7273 | 0.1437 | 1.7747 |
| 4/20/2019 2:50 | 0.7    | 0.275   | 4.8088 | -0.45   | 2.2476 | 30.7    | 0.149  | 1.8015 |
| 4/20/2019 2:51 | 0.7    | -0.15   | 4.6538 | -0.6833 | 2.2449 | 30.7182 | 0.1468 | 1.7842 |
| 4/20/2019 2:52 | 0.7    | -1.1333 | 4.8977 | -0.45   | 2.2427 | 30.78   | 0.1306 | 1.7709 |
| 4/20/2019 2:53 | 0.7083 | 0.325   | 4.6145 | 0.3167  | 2.2556 | 30.73   | 0.16   | 1.795  |
| 4/20/2019 2:54 | 0.7182 | -0.3333 | 4.5185 | -0.65   | 2.2478 | 30.7364 | 0.1378 | 1.7627 |
| 4/20/2019 2:55 | 0.7    | -0.15   | 4.7023 | -0.2167 | 2.2356 | 30.88   | 0.1508 | 1.7608 |

|                |        |         |        |         |        |         |        |        |
|----------------|--------|---------|--------|---------|--------|---------|--------|--------|
| 4/20/2019 2:56 | 0.7    | -0.425  | 4.771  | -0.4333 | 2.2253 | 31      | 0.1491 | 1.7685 |
| 4/20/2019 2:57 | 0.7    | -0.3417 | 4.8173 | -0.3333 | 2.2415 | 30.9    | 0.1417 | 1.7344 |
| 4/20/2019 2:58 | 0.7    | -0.175  | 4.8658 | -0.4167 | 2.2587 | 30.9    | 0.1559 | 1.7633 |
| 4/20/2019 2:59 | 0.7    | -0.5583 | 4.8912 | -0.4833 | 2.2402 | 30.9909 | 0.1411 | 1.7604 |
| 4/20/2019 3:00 | 0.7    | -0.275  | 4.6457 | -0.65   | 2.2251 | 31      | 0.1492 | 1.7615 |
| 4/20/2019 3:01 | 0.7333 | 0.2     | 5.0272 | -0.3    | 2.2398 | 31      | 0.1473 | 1.7591 |
| 4/20/2019 3:02 | 0.7167 | -0.5333 | 4.6802 | -0.0333 | 2.2513 | 30.9583 | 0.1382 | 1.7583 |
| 4/20/2019 3:03 | 0.6333 | -0.3833 | 4.6087 | -0.3833 | 2.2296 | 30.8364 | 0.1542 | 1.7846 |
| 4/20/2019 3:04 | 0.6    | 0.025   | 4.7667 | -0.1    | 2.2546 | 30.7091 | 0.1266 | 1.7751 |
| 4/20/2019 3:05 | 0.6    | -0.3    | 4.7225 | 0.2667  | 2.2315 | 30.59   | 0.158  | 1.7798 |
| 4/20/2019 3:06 | 0.6    | -0.35   | 4.6518 | -0.2667 | 2.2428 | 30.4273 | 0.1449 | 1.7581 |
| 4/20/2019 3:07 | 0.6    | -0.0583 | 4.7418 | -0.2833 | 2.2523 | 30.4    | 0.1439 | 1.7522 |
| 4/20/2019 3:08 | 0.6    | 0.1417  | 4.9975 | -0.15   | 2.2423 | 30.4    | 0.1461 | 1.8    |
| 4/20/2019 3:09 | 0.625  | -0.2083 | 4.7322 | -0.0667 | 2.2503 | 30.325  | 0.1373 | 1.8073 |
| 4/20/2019 3:10 | 0.7    | 0.175   | 4.6077 | -0.5833 | 2.2206 | 30.3    | 0.1504 | 1.802  |
| 4/20/2019 3:11 | 0.7    | 0.2167  | 4.7227 | -0.85   | 2.2502 | 30.3    | 0.1373 | 1.804  |
| 4/20/2019 3:12 | 0.6833 | -0.3333 | 4.5765 | -0.3    | 2.2405 | 30.2455 | 0.154  | 1.7752 |
| 4/20/2019 3:13 | 0.6    | 0.2417  | 4.9193 | -0.4333 | 2.2379 | 30.2    | 0.141  | 1.7913 |
| 4/20/2019 3:14 | 0.6    | -0.9167 | 4.7847 | -0.4667 | 2.2556 | 30.2    | 0.1489 | 1.7978 |
| 4/20/2019 3:15 | 0.6    | 0.025   | 4.9662 | -0.4    | 2.2538 | 30.2889 | 0.1509 | 1.7843 |
| 4/20/2019 3:16 | 0.6    | -0.7    | 4.7673 | 0.0167  | 2.262  | 30.47   | 0.1439 | 1.7739 |
| 4/20/2019 3:17 | 0.6    | -0.1833 | 5.0275 | -0.9833 | 2.262  | 30.52   | 0.1483 | 1.7738 |
| 4/20/2019 3:18 | 0.6083 | -0.2    | 4.7358 | -0.3    | 2.2439 | 30.78   | 0.1362 | 1.7688 |
| 4/20/2019 3:19 | 0.6917 | -0.7917 | 4.8238 | -0.05   | 2.248  | 30.8556 | 0.1519 | 1.7913 |
| 4/20/2019 3:20 | 0.6833 | 0.075   | 4.3112 | -1.0333 | 2.2448 | 30.9    | 0.1478 | 1.7806 |
| 4/20/2019 3:21 | 0.6833 | -0.2667 | 4.691  | 0.0667  | 2.2415 | 30.9    | 0.148  | 1.7722 |
| 4/20/2019 3:22 | 0.625  | 0.15    | 4.413  | 0.0333  | 2.2379 | 30.94   | 0.1538 | 1.7735 |
| 4/20/2019 3:23 | 0.6    | -0.2417 | 4.4867 | -0.4667 | 2.2602 | 30.94   | 0.131  | 1.7808 |
| 4/20/2019 3:24 | 0.6    | -0.0417 | 4.6723 | -0.35   | 2.2613 | 30.9    | 0.155  | 1.7774 |
| 4/20/2019 3:25 | 0.6167 | -0.5667 | 4.7123 | -0.5    | 2.2573 | 30.98   | 0.1368 | 1.7764 |
| 4/20/2019 3:26 | 0.7    | 0       | 4.7278 | -0.1333 | 2.2589 | 31      | 0.1412 | 1.7738 |
| 4/20/2019 3:27 | 0.7    | -0.125  | 4.6368 | -0.3333 | 2.2598 | 30.9364 | 0.141  | 1.7948 |
| 4/20/2019 3:28 | 0.675  | 0.0167  | 4.4407 | -0.7    | 2.2729 | 30.9    | 0.1452 | 1.8107 |
| 4/20/2019 3:29 | 0.6583 | 0.25    | 4.7293 | -0.1833 | 2.2782 | 30.9    | 0.145  | 1.7852 |
| 4/20/2019 3:30 | 0.6667 | -0.45   | 4.9767 | -0.0333 | 2.2688 | 30.9    | 0.1447 | 1.7873 |
| 4/20/2019 3:31 | 0.6    | 0.1     | 4.9653 | -0.2667 | 2.2572 | 30.9    | 0.1559 | 1.7706 |
| 4/20/2019 3:32 | 0.6333 | -0.025  | 4.7973 | -0.35   | 2.2625 | 30.9    | 0.1412 | 1.7922 |
| 4/20/2019 3:33 | 0.6333 | -0.2167 | 4.4818 | -0.8667 | 2.2659 | 30.9    | 0.1538 | 1.8043 |
| 4/20/2019 3:34 | 0.7    | -0.5417 | 4.5349 | -0.45   | 2.257  | 30.96   | 0.142  | 1.788  |
| 4/20/2019 3:35 | 0.7    | 0.0667  | 4.6525 | -0.4833 | 2.2533 | 31.01   | 0.1386 | 1.8041 |
| 4/20/2019 3:36 | 0.7    | -0.7833 | 4.8999 | -0.6667 | 2.2702 | 31.15   | 0.1535 | 1.8069 |
| 4/20/2019 3:37 | 0.65   | -0.575  | 4.7189 | -0.2667 | 2.2536 | 31.2    | 0.137  | 1.7834 |
| 4/20/2019 3:38 | 0.6    | -0.55   | 4.5846 | -0.6333 | 2.2538 | 31.2    | 0.1531 | 1.7571 |
| 4/20/2019 3:39 | 0.6    | -0.4    | 4.6863 | -0.45   | 2.2698 | 31.2    | 0.1365 | 1.7743 |
| 4/20/2019 3:40 | 0.6    | -0.35   | 4.4196 | -0.6167 | 2.2723 | 31.3    | 0.1522 | 1.7878 |
| 4/20/2019 3:41 | 0.6    | 0.0333  | 4.6088 | -0.3333 | 2.2908 | 31.22   | 0.1408 | 1.7528 |
| 4/20/2019 3:42 | 0.6    | -0.2667 | 4.8112 | -0.55   | 2.2642 | 31.2    | 0.1414 | 1.7716 |



|                |        |         |        |         |        |         |        |        |
|----------------|--------|---------|--------|---------|--------|---------|--------|--------|
| 4/20/2019 3:43 | 0.6    | -0.125  | 4.5398 | 0       | 2.2871 | 31.22   | 0.1522 | 1.7719 |
| 4/20/2019 3:44 | 0.6    | -0.6917 | 4.6418 | -0.7833 | 2.2813 | 31.3    | 0.1312 | 1.7604 |
| 4/20/2019 3:45 | 0.6    | -0.325  | 4.7368 | 0.1333  | 2.2792 | 31.2455 | 0.1482 | 1.7414 |
| 4/20/2019 3:46 | 0.6    | -0.8833 | 4.6418 | -0.5667 | 2.2893 | 31.2    | 0.1376 | 1.7433 |
| 4/20/2019 3:47 | 0.55   | -0.3833 | 4.6228 | -0.1833 | 2.2713 | 31.1091 | 0.1457 | 1.7556 |
| 4/20/2019 3:48 | 0.525  | 0.3     | 4.5723 | -0.7    | 2.2734 | 30.91   | 0.1493 | 1.7854 |
| 4/20/2019 3:49 | 0.5    | -1.0667 | 4.5938 | -0.35   | 2.2871 | 30.8    | 0.1408 | 1.7812 |
| 4/20/2019 3:50 | 0.5167 | 0.0917  | 4.4918 | -0.7833 | 2.311  | 30.7727 | 0.1554 | 1.7924 |
| 4/20/2019 3:51 | 0.5167 | -0.3167 | 4.737  | -0.4667 | 2.298  | 30.7091 | 0.1331 | 1.7931 |
| 4/20/2019 3:52 | 0.5333 | -0.4583 | 4.3898 | -0.4    | 2.2851 | 30.75   | 0.1502 | 1.7885 |
| 4/20/2019 3:53 | 0.6    | -0.6583 | 4.2649 | -0.5    | 2.3348 | 30.8    | 0.1447 | 1.8148 |
| 4/20/2019 3:54 | 0.6    | -0.6917 | 4.4389 | 0.1833  | 2.2699 | 30.78   | 0.1422 | 1.7933 |
| 4/20/2019 3:55 | 0.6583 | -0.3333 | 4.4877 | -0.7833 | 2.3    | 30.63   | 0.1515 | 1.7688 |
| 4/20/2019 3:56 | 0.6583 | -1.1583 | 4.4663 | -0.65   | 2.2966 | 30.4364 | 0.1396 | 1.7888 |
| 4/20/2019 3:57 | 0.6917 | -0.1    | 4.2884 | 0       | 2.3098 | 30.4    | 0.1462 | 1.7677 |
| 4/20/2019 3:58 | 0.6917 | -0.225  | 4.8511 | -0.3833 | 2.3044 | 30.4    | 0.1403 | 1.795  |
| 4/20/2019 3:59 | 0.7    | -0.4417 | 4.6253 | -0.5    | 2.3368 | 30.4    | 0.1403 | 1.7998 |
| 4/20/2019 4:00 | 0.6167 | -0.8417 | 4.7106 | -0.3833 | 2.3025 | 30.4909 | 0.147  | 1.7947 |
| 4/20/2019 4:01 | 0.6    | 0.15    | 4.4993 | -0.5333 | 2.2969 | 30.6    | 0.1332 | 1.8196 |
| 4/20/2019 4:02 | 0.6    | -0.55   | 4.5068 | -0.3    | 2.3196 | 30.6    | 0.1477 | 1.8395 |
| 4/20/2019 4:03 | 0.6    | 0.2667  | 4.2073 | -0.2833 | 2.2982 | 30.6    | 0.1316 | 1.811  |
| 4/20/2019 4:04 | 0.6333 | -0.2417 | 4.5025 | -0.7167 | 2.3059 | 30.5818 | 0.1512 | 1.7872 |
| 4/20/2019 4:05 | 0.6    | -0.2667 | 4.3959 | -0.4167 | 2.2822 | 30.53   | 0.1378 | 1.7821 |
| 4/20/2019 4:06 | 0.625  | -0.0417 | 4.4056 | -0.4333 | 2.303  | 30.6545 | 0.1403 | 1.7753 |
| 4/20/2019 4:07 | 0.6083 | 0.3667  | 4.7197 | -0.5167 | 2.3233 | 30.8636 | 0.1517 | 1.7731 |
| 4/20/2019 4:08 | 0.6583 | 0.0333  | 4.3376 | -0.7333 | 2.3233 | 30.9455 | 0.1315 | 1.7734 |
| 4/20/2019 4:09 | 0.7    | -0.075  | 4.7443 | -0.6    | 2.3196 | 31.1182 | 0.1432 | 1.7709 |
| 4/20/2019 4:10 | 0.7    | -0.125  | 4.729  | -0.5    | 2.3175 | 31.2    | 0.1344 | 1.7809 |
| 4/20/2019 4:11 | 0.7    | -0.3417 | 4.918  | -0.5333 | 2.3287 | 31.3    | 0.1433 | 1.7925 |
| 4/20/2019 4:12 | 0.6417 | 0.2917  | 4.3903 | -0.1333 | 2.3132 | 31.3    | 0.1416 | 1.8071 |
| 4/20/2019 4:13 | 0.6    | -0.5917 | 4.7326 | -0.75   | 2.3091 | 31.4    | 0.1374 | 1.8103 |
| 4/20/2019 4:14 | 0.6    | -0.9083 | 4.1988 | -0.1333 | 2.3371 | 31.4    | 0.1492 | 1.7667 |
| 4/20/2019 4:15 | 0.6333 | -0.975  | 4.3039 | -0.5833 | 2.3017 | 31.4091 | 0.1341 | 1.7443 |
| 4/20/2019 4:16 | 0.7    | 0.1417  | 4.4126 | 0.0167  | 2.3157 | 31.52   | 0.1489 | 1.7703 |
| 4/20/2019 4:17 | 0.7    | -0.4583 | 4.4139 | -0.1667 | 2.299  | 31.6    | 0.1365 | 1.7828 |
| 4/20/2019 4:18 | 0.65   | -0.8833 | 4.4028 | -0.3333 | 2.299  | 31.5546 | 0.1381 | 1.7561 |
| 4/20/2019 4:19 | 0.6    | -0.1583 | 4.3532 | -0.1833 | 2.302  | 31.5    | 0.1416 | 1.7473 |
| 4/20/2019 4:20 | 0.6417 | -0.625  | 4.5797 | -0.05   | 2.3361 | 31.5917 | 0.135  | 1.7768 |
| 4/20/2019 4:21 | 0.65   | -0.6167 | 4.6536 | -0.0833 | 2.3113 | 31.67   | 0.1416 | 1.7753 |
| 4/20/2019 4:22 | 0.7    | -0.1333 | 4.6118 | -0.8167 | 2.3215 | 31.67   | 0.1304 | 1.7998 |
| 4/20/2019 4:23 | 0.75   | 0.3167  | 4.1664 | -0.45   | 2.3094 | 31.7    | 0.1406 | 1.7993 |
| 4/20/2019 4:24 | 0.7917 | -0.375  | 4.5464 | -0.2667 | 2.2991 | 31.7455 | 0.1446 | 1.7808 |
| 4/20/2019 4:25 | 0.7833 | -0.2    | 4.3334 | -0.5333 | 2.3053 | 31.8    | 0.1405 | 1.7792 |
| 4/20/2019 4:26 | 0.725  | -0.7167 | 4.1381 | -0.6667 | 2.275  | 31.8    | 0.1461 | 1.8139 |
| 4/20/2019 4:27 | 0.7    | -0.175  | 4.557  | -0.25   | 2.2958 | 31.8    | 0.1329 | 1.8187 |
| 4/20/2019 4:28 | 0.7    | -0.2417 | 4.8098 | -0.3667 | 2.287  | 31.8    | 0.1463 | 1.7968 |
| 4/20/2019 4:29 | 0.6917 | -0.5833 | 4.4107 | -0.9333 | 2.2932 | 31.76   | 0.1296 | 1.7763 |

|                |        |         |        |         |        |         |        |        |
|----------------|--------|---------|--------|---------|--------|---------|--------|--------|
| 4/20/2019 4:30 | 0.6833 | -0.3    | 4.5686 | -0.6333 | 2.2823 | 31.7    | 0.1399 | 1.7871 |
| 4/20/2019 4:31 | 0.65   | -0.075  | 4.4951 | -0.8667 | 2.2985 | 31.6778 | 0.1422 | 1.8059 |
| 4/20/2019 4:32 | 0.6083 | 0.025   | 4.5803 | -0.25   | 2.3023 | 31.6    | 0.1372 | 1.8066 |
| 4/20/2019 4:33 | 0.6083 | -0.8917 | 4.3212 | -0.6    | 2.289  | 31.5455 | 0.1508 | 1.8148 |
| 4/20/2019 4:34 | 0.6    | 0.4917  | 4.3946 | -0.4333 | 2.3196 | 31.5    | 0.1292 | 1.8136 |
| 4/20/2019 4:35 | 0.6    | -0.6833 | 4.5123 | -0.1333 | 2.2903 | 31.4455 | 0.1458 | 1.8388 |
| 4/20/2019 4:36 | 0.6    | 0.3667  | 4.6354 | -0.6    | 2.2999 | 31.4    | 0.1421 | 1.8076 |
| 4/20/2019 4:37 | 0.6    | 0.2917  | 4.4087 | -0.8833 | 2.2853 | 31.4    | 0.135  | 1.8102 |
| 4/20/2019 4:38 | 0.6    | -0.5583 | 4.4474 | -0.4167 | 2.2895 | 31.4    | 0.1418 | 1.7936 |
| 4/20/2019 4:39 | 0.6    | -0.35   | 4.5712 | 0.2333  | 2.2981 | 31.4    | 0.1323 | 1.8008 |
| 4/20/2019 4:40 | 0.6417 | -0.425  | 4.248  | 0.0667  | 2.2715 | 31.3818 | 0.1489 | 1.7802 |
| 4/20/2019 4:41 | 0.6167 | -0.5917 | 4.5081 | -0.25   | 2.2702 | 31.3364 | 0.1324 | 1.7813 |
| 4/20/2019 4:42 | 0.6    | -0.375  | 4.6007 | 0.2333  | 2.2525 | 31.4    | 0.1458 | 1.7904 |
| 4/20/2019 4:43 | 0.5333 | -0.625  | 4.2767 | -0.55   | 2.3035 | 31.43   | 0.1405 | 1.7985 |
| 4/20/2019 4:44 | 0.5417 | -0.4    | 4.7573 | -0.3667 | 2.2888 | 31.5    | 0.1384 | 1.7972 |
| 4/20/2019 4:45 | 0.6    | -0.5417 | 4.5711 | -0.2667 | 2.2969 | 31.5    | 0.1453 | 1.8035 |
| 4/20/2019 4:46 | 0.6    | -0.4083 | 4.6266 | -0.1833 | 2.2908 | 31.5    | 0.1293 | 1.7993 |
| 4/20/2019 4:47 | 0.6    | -0.1083 | 4.8335 | -0.2833 | 2.2811 | 31.5    | 0.1417 | 1.7755 |
| 4/20/2019 4:48 | 0.5583 | -0.2667 | 4.6378 | -0.3167 | 2.2913 | 31.5    | 0.1319 | 1.8093 |
| 4/20/2019 4:49 | 0.6    | -0.175  | 4.6838 | -0.3167 | 2.2713 | 31.48   | 0.1397 | 1.8285 |
| 4/20/2019 4:50 | 0.6    | -0.2833 | 4.6089 | -0.1833 | 2.2833 | 31.38   | 0.1471 | 1.8153 |
| 4/20/2019 4:51 | 0.6917 | -0.55   | 4.505  | -0.6667 | 2.2587 | 31.33   | 0.127  | 1.8121 |
| 4/20/2019 4:52 | 0.7    | -0.4333 | 4.4533 | -0.7833 | 2.2833 | 31.3455 | 0.1512 | 1.799  |
| 4/20/2019 4:53 | 0.7    | -0.6667 | 4.2211 | -0.35   | 2.2738 | 31.3    | 0.1246 | 1.7912 |
| 4/20/2019 4:54 | 0.7    | 0.0833  | 4.35   | -0.85   | 2.2648 | 31.3    | 0.1407 | 1.7988 |
| 4/20/2019 4:55 | 0.7    | -0.3    | 4.6133 | -0.6667 | 2.2769 | 31.2636 | 0.1382 | 1.7974 |
| 4/20/2019 4:56 | 0.7    | -1.1333 | 4.5836 | 0       | 2.2753 | 31.15   | 0.138  | 1.796  |
| 4/20/2019 4:57 | 0.6667 | -0.2083 | 4.6493 | -1.2667 | 2.2728 | 31.1    | 0.1463 | 1.7903 |
| 4/20/2019 4:58 | 0.6    | 0.3667  | 4.4615 | -0.3833 | 2.2826 | 31.1    | 0.1346 | 1.766  |
| 4/20/2019 4:59 | 0.6583 | -0.0167 | 4.3793 | -0.8333 | 2.2692 | 31.0727 | 0.1466 | 1.7813 |
| 4/20/2019 5:00 | 0.6333 | -0.1667 | 4.4761 | -0.7167 | 2.2702 | 31.02   | 0.1323 | 1.7824 |
| 4/20/2019 5:01 | 0.7    | -0.4833 | 4.6865 | -0.3667 | 2.276  | 31.1    | 0.1467 | 1.7945 |
| 4/20/2019 5:02 | 0.6167 | -0.4417 | 4.4325 | -0.1833 | 2.2884 | 31.1    | 0.1349 | 1.7984 |
| 4/20/2019 5:03 | 0.6333 | -0.2083 | 4.724  | -0.5167 | 2.2885 | 31.1    | 0.1438 | 1.8204 |
| 4/20/2019 5:04 | 0.6083 | 0.3833  | 4.462  | -0.4833 | 2.3145 | 31.0273 | 0.1427 | 1.7802 |
| 4/20/2019 5:05 | 0.6    | 0.3667  | 4.5717 | -0.3333 | 2.2792 | 30.9909 | 0.1343 | 1.7805 |
| 4/20/2019 5:06 | 0.6    | -0.1583 | 4.4727 | 0.0167  | 2.288  | 30.8546 | 0.1455 | 1.7971 |
| 4/20/2019 5:07 | 0.6    | -0.2667 | 4.5948 | -0.4833 | 2.2737 | 30.8    | 0.1378 | 1.809  |
| 4/20/2019 5:08 | 0.6    | -0.0417 | 4.8242 | -0.3333 | 2.2712 | 30.8091 | 0.1401 | 1.7986 |
| 4/20/2019 5:09 | 0.6    | -0.8    | 4.7168 | -0.75   | 2.2793 | 30.9    | 0.1411 | 1.8137 |
| 4/20/2019 5:10 | 0.5833 | -0.275  | 4.6157 | -0.25   | 2.288  | 30.9    | 0.1277 | 1.8081 |
| 4/20/2019 5:11 | 0.5    | -0.5167 | 4.6327 | -0.0833 | 2.3013 | 30.9    | 0.1472 | 1.7839 |
| 4/20/2019 5:12 | 0.5    | 0.15    | 4.4538 | -0.3833 | 2.2646 | 30.9    | 0.137  | 1.7818 |
| 4/20/2019 5:13 | 0.5    | -0.1333 | 4.5893 | -0.2    | 2.2767 | 30.8833 | 0.1441 | 1.7925 |
| 4/20/2019 5:14 | 0.5    | -0.2667 | 4.8618 | -0.2833 | 2.2864 | 30.8    | 0.137  | 1.7809 |
| 4/20/2019 5:15 | 0.4917 | -0.925  | 4.7267 | -0.0167 | 2.2836 | 30.8417 | 0.1381 | 1.7898 |
| 4/20/2019 5:16 | 0.5    | -0.5333 | 4.6075 | -0.8    | 2.2989 | 30.9273 | 0.1445 | 1.8308 |

|                |        |         |        |         |        |         |        |        |
|----------------|--------|---------|--------|---------|--------|---------|--------|--------|
| 4/20/2019 5:17 | 0.5    | -0.475  | 4.5598 | -0.9333 | 2.2973 | 31.0091 | 0.1298 | 1.815  |
| 4/20/2019 5:18 | 0.5    | -0.575  | 4.782  | -0.6    | 2.3045 | 31.15   | 0.1423 | 1.8043 |
| 4/20/2019 5:19 | 0.5    | -0.8417 | 4.5755 | -0.3167 | 2.305  | 31.24   | 0.1306 | 1.8074 |
| 4/20/2019 5:20 | 0.5    | 0.0583  | 4.5382 | -0.5167 | 2.3119 | 31.3455 | 0.1379 | 1.8254 |
| 4/20/2019 5:21 | 0.5    | -0.3167 | 4.5463 | -0.7    | 2.3197 | 31.4    | 0.1458 | 1.8039 |
| 4/20/2019 5:22 | 0.5    | -0.3833 | 4.6947 | -0.1833 | 2.2947 | 31.3182 | 0.1329 | 1.8025 |
| 4/20/2019 5:23 | 0.5083 | -0.275  | 4.8017 | -0.6667 | 2.2905 | 31.3273 | 0.1488 | 1.8057 |
| 4/20/2019 5:24 | 0.6    | -0.2333 | 4.5742 | -0.0833 | 2.3026 | 31.3    | 0.1281 | 1.8239 |
| 4/20/2019 5:25 | 0.6    | 0.5917  | 4.6878 | -0.7    | 2.3003 | 31.3    | 0.1487 | 1.825  |
| 4/20/2019 5:26 | 0.6    | -0.95   | 4.731  | -0.2333 | 2.2962 | 31.37   | 0.1333 | 1.8061 |
| 4/20/2019 5:27 | 0.6    | 0.075   | 4.6838 | -0.4833 | 2.3101 | 31.4    | 0.137  | 1.8027 |
| 4/20/2019 5:28 | 0.6    | -0.3333 | 4.7915 | -0.25   | 2.3054 | 31.4    | 0.1466 | 1.7865 |
| 4/20/2019 5:29 | 0.6    | -0.0667 | 4.6822 | -0.8    | 2.3143 | 31.3091 | 0.1342 | 1.7935 |
| 4/20/2019 5:30 | 0.6083 | 0.05    | 4.4973 | -0.7667 | 2.313  | 31.3    | 0.1433 | 1.8013 |
| 4/20/2019 5:31 | 0.6    | -0.25   | 4.6667 | -0.2833 | 2.2992 | 31.3    | 0.1317 | 1.7804 |
| 4/20/2019 5:32 | 0.6    | -0.5083 | 4.5902 | -0.7333 | 2.3036 | 31.2273 | 0.1435 | 1.7856 |
| 4/20/2019 5:33 | 0.6    | -0.4083 | 4.6918 | 0.1333  | 2.3113 | 31.1667 | 0.1434 | 1.8218 |
| 4/20/2019 5:34 | 0.6    | -0.5083 | 4.4252 | -0.3167 | 2.3183 | 31.16   | 0.1315 | 1.8278 |
| 4/20/2019 5:35 | 0.6    | 0.275   | 4.6657 | 0.0333  | 2.2933 | 31.1    | 0.1435 | 1.8093 |
| 4/20/2019 5:36 | 0.6    | 0.4167  | 4.4988 | 0.0167  | 2.3173 | 31.1909 | 0.1362 | 1.8059 |
| 4/20/2019 5:37 | 0.6    | -0.5583 | 4.525  | -0.8333 | 2.3168 | 31.2    | 0.1438 | 1.7876 |
| 4/20/2019 5:38 | 0.5667 | -0.3083 | 4.3925 | -0.1333 | 2.3381 | 31.0546 | 0.1334 | 1.7858 |
| 4/20/2019 5:39 | 0.5    | -0.6667 | 4.4165 | -0.1167 | 2.3273 | 31      | 0.1452 | 1.777  |
| 4/20/2019 5:40 | 0.5    | -1.0917 | 4.4498 | -0.6667 | 2.3082 | 30.8818 | 0.1414 | 1.7954 |
| 4/20/2019 5:41 | 0.475  | 0.1917  | 4.5275 | -1.15   | 2.3421 | 30.73   | 0.1335 | 1.8127 |
| 4/20/2019 5:42 | 0.5417 | 0.1167  | 4.6908 | -0.25   | 2.3294 | 30.7    | 0.1493 | 1.8107 |
| 4/20/2019 5:43 | 0.6    | -0.1083 | 4.489  | -0.7    | 2.328  | 30.7    | 0.1342 | 1.7933 |
| 4/20/2019 5:44 | 0.6    | -0.525  | 4.4083 | -0.25   | 2.3049 | 30.6273 | 0.1463 | 1.8028 |
| 4/20/2019 5:45 | 0.6    | -0.5917 | 4.854  | 0.05    | 2.3405 | 30.6    | 0.1272 | 1.792  |
| 4/20/2019 5:46 | 0.6083 | -1.0833 | 4.4147 | -0.45   | 2.3231 | 30.6    | 0.1411 | 1.7898 |
| 4/20/2019 5:47 | 0.6    | -0.025  | 4.5898 | -0.25   | 2.3314 | 30.5778 | 0.141  | 1.7782 |
| 4/20/2019 5:48 | 0.6    | -0.0667 | 4.4473 | 0.1167  | 2.3503 | 30.5    | 0.1327 | 1.7995 |
| 4/20/2019 5:49 | 0.6    | -1.5583 | 4.4318 | -0.35   | 2.3447 | 30.5    | 0.1482 | 1.801  |
| 4/20/2019 5:50 | 0.6    | -0.5167 | 4.4458 | -0.8333 | 2.3454 | 30.53   | 0.131  | 1.8096 |
| 4/20/2019 5:51 | 0.6667 | -0.5083 | 4.4105 | -0.7    | 2.3523 | 30.5546 | 0.142  | 1.8243 |
| 4/20/2019 5:52 | 0.7    | -0.0667 | 4.3488 | -0.1    | 2.3683 | 30.5636 | 0.1398 | 1.8135 |
| 4/20/2019 5:53 | 0.6583 | -0.25   | 4.6418 | -0.8    | 2.3329 | 30.7455 | 0.1399 | 1.7992 |
| 4/20/2019 5:54 | 0.6    | -0.5083 | 4.4773 | -0.4333 | 2.3295 | 30.7727 | 0.1416 | 1.7946 |
| 4/20/2019 5:55 | 0.6    | -0.3833 | 4.5012 | -0.5    | 2.3418 | 30.7    | 0.1269 | 1.8098 |
| 4/20/2019 5:56 | 0.6083 | -0.15   | 4.5663 | -0.5667 | 2.3355 | 30.8273 | 0.1466 | 1.8098 |
| 4/20/2019 5:57 | 0.7    | 0.5417  | 4.393  | -0.5333 | 2.3489 | 30.9    | 0.1294 | 1.7988 |
| 4/20/2019 5:58 | 0.7    | -0.775  | 4.2977 | -0.4667 | 2.3438 | 30.9727 | 0.144  | 1.8143 |
| 4/20/2019 5:59 | 0.7    | -0.475  | 4.3947 | -0.8667 | 2.3664 | 31.05   | 0.1416 | 1.7896 |
| 4/20/2019 6:00 | 0.7    | -0.6083 | 4.557  | -0.45   | 2.3446 | 31.2    | 0.133  | 1.8085 |
| 4/20/2019 6:01 | 0.6833 | -0.0833 | 4.4415 | -0.8667 | 2.3149 | 31.2    | 0.1427 | 1.8236 |
| 4/20/2019 6:02 | 0.6    | -0.2083 | 4.3895 | -0.2    | 2.3308 | 31.2    | 0.1283 | 1.8293 |
| 4/20/2019 6:03 | 0.6    | -0.425  | 4.3717 | -0.1833 | 2.3212 | 31.3    | 0.1409 | 1.8091 |

|                |        |         |        |         |        |         |        |        |
|----------------|--------|---------|--------|---------|--------|---------|--------|--------|
| 4/20/2019 6:04 | 0.6833 | 0.1833  | 4.489  | -1      | 2.3429 | 31.4    | 0.1296 | 1.8057 |
| 4/20/2019 6:05 | 0.7    | -0.0333 | 4.4245 | -0.6333 | 2.3556 | 31.5    | 0.1351 | 1.807  |
| 4/20/2019 6:06 | 0.6583 | -0.6583 | 4.4555 | -0.8333 | 2.364  | 31.4273 | 0.1357 | 1.8325 |
| 4/20/2019 6:07 | 0.6583 | 0.6833  | 4.3205 | -0.5667 | 2.3178 | 31.5    | 0.1329 | 1.7937 |
| 4/20/2019 6:08 | 0.7    | -0.55   | 4.5452 | -0.8167 | 2.3658 | 31.4182 | 0.1491 | 1.7578 |
| 4/20/2019 6:09 | 0.7    | 0.65    | 4.2548 | -1      | 2.3582 | 31.4    | 0.1352 | 1.7828 |
| 4/20/2019 6:10 | 0.7    | -0.5167 | 4.6075 | -0.3833 | 2.3528 | 31.3455 | 0.1431 | 1.7805 |
| 4/20/2019 6:11 | 0.7    | -0.275  | 4.389  | -0.6833 | 2.3588 | 31.3    | 0.1397 | 1.7907 |
| 4/20/2019 6:12 | 0.7    | -0.8833 | 4.4488 | -0.2167 | 2.3458 | 31.34   | 0.1297 | 1.7908 |
| 4/20/2019 6:13 | 0.7    | -0.0417 | 4.4973 | -0.95   | 2.3519 | 31.4    | 0.1484 | 1.8033 |
| 4/20/2019 6:14 | 0.7    | -0.0917 | 4.525  | -1.3167 | 2.3556 | 31.4    | 0.13   | 1.8004 |
| 4/20/2019 6:15 | 0.7    | -0.8583 | 4.5753 | -0.2167 | 2.3498 | 31.4    | 0.1438 | 1.7713 |
| 4/20/2019 6:16 | 0.7    | -0.1    | 4.47   | -0.25   | 2.3426 | 31.4    | 0.1355 | 1.8057 |
| 4/20/2019 6:17 | 0.7583 | -0.8167 | 4.3777 | -0.3    | 2.3467 | 31.32   | 0.1281 | 1.7998 |
| 4/20/2019 6:18 | 0.8    | -0.8167 | 4.463  | -0.4167 | 2.3641 | 31.3636 | 0.1501 | 1.7985 |
| 4/20/2019 6:19 | 0.7417 | -0.0333 | 4.4638 | -0.1333 | 2.3639 | 31.4    | 0.13   | 1.8026 |
| 4/20/2019 6:20 | 0.6667 | 0.1917  | 4.559  | -0.4    | 2.362  | 31.4546 | 0.1432 | 1.7824 |
| 4/20/2019 6:21 | 0.6083 | -0.3167 | 4.5118 | -0.0667 | 2.3455 | 31.5    | 0.1324 | 1.7604 |
| 4/20/2019 6:22 | 0.6    | -0.9333 | 4.3968 | -0.6    | 2.3431 | 31.5    | 0.1406 | 1.7578 |
| 4/20/2019 6:23 | 0.6167 | -0.6667 | 4.4148 | -0.9167 | 2.3272 | 31.5    | 0.1388 | 1.796  |
| 4/20/2019 6:24 | 0.6    | 0.3583  | 4.3083 | -0.4    | 2.3368 | 31.5    | 0.1283 | 1.8274 |
| 4/20/2019 6:25 | 0.6    | -0.2    | 4.3648 | -0.4667 | 2.3499 | 31.5    | 0.1483 | 1.8082 |
| 4/20/2019 6:26 | 0.6    | 0.0333  | 4.5883 | -0.55   | 2.3401 | 31.45   | 0.1328 | 1.7848 |
| 4/20/2019 6:27 | 0.6    | -0.6833 | 4.373  | -0.65   | 2.3557 | 31.5    | 0.1361 | 1.7799 |
| 4/20/2019 6:28 | 0.6    | -0.6417 | 4.2548 | -0.4667 | 2.3428 | 31.4091 | 0.1405 | 1.7919 |
| 4/20/2019 6:29 | 0.6    | -0.3    | 4.1787 | 0.4167  | 2.3599 | 31.4    | 0.1331 | 1.806  |
| 4/20/2019 6:30 | 0.6583 | -0.2667 | 4.5912 | -0.3833 | 2.349  | 31.43   | 0.1392 | 1.8125 |
| 4/20/2019 6:31 | 0.7    | -0.3417 | 4.4663 | -0.4667 | 2.3418 | 31.4    | 0.1254 | 1.7646 |
| 4/20/2019 6:32 | 0.7    | -0.35   | 4.5447 | 0.2     | 2.3528 | 31.3727 | 0.1464 | 1.7933 |
| 4/20/2019 6:33 | 0.7    | -1.0333 | 4.4563 | -0.5333 | 2.3376 | 31.3    | 0.1261 | 1.7902 |
| 4/20/2019 6:34 | 0.6333 | 0.2917  | 4.4251 | -0.4333 | 2.3591 | 31.3    | 0.1413 | 1.8077 |
| 4/20/2019 6:35 | 0.6455 | 0.2333  | 4.2678 | -0.5    | 2.3761 | 31.3    | 0.1343 | 1.7875 |
| 4/20/2019 6:36 | 0.6167 | -0.45   | 4.2707 | 0.0167  | 2.3982 | 31.2    | 0.1359 | 1.7682 |
| 4/20/2019 6:37 | 0.6    | -0.75   | 4.4191 | 0.0333  | 2.3851 | 31.2273 | 0.1427 | 1.7773 |
| 4/20/2019 6:38 | 0.6    | -0.3417 | 4.4646 | 0.2167  | 2.3883 | 31.2    | 0.1304 | 1.7868 |
| 4/20/2019 6:39 | 0.65   | -0.2    | 4.4663 | -0.2    | 2.3579 | 31.2    | 0.1439 | 1.7578 |
| 4/20/2019 6:40 | 0.7    | -0.6583 | 4.4209 | -0.8    | 2.3853 | 31.175  | 0.1274 | 1.7319 |
| 4/20/2019 6:41 | 0.7    | 0.0833  | 4.5979 | -0.3167 | 2.3592 | 31.1545 | 0.1408 | 1.7474 |
| 4/20/2019 6:42 | 0.7    | 0.5667  | 4.4163 | -0.4167 | 2.3512 | 31.1    | 0.1392 | 1.7373 |
| 4/20/2019 6:43 | 0.7    | 0.1167  | 4.4849 | -0.25   | 2.3526 | 30.97   | 0.1373 | 1.7616 |
| 4/20/2019 6:44 | 0.7    | -0.125  | 4.4671 | -0.3    | 2.3681 | 30.8909 | 0.1462 | 1.7668 |
| 4/20/2019 6:45 | 0.7    | -0.3333 | 4.5446 | -0.95   | 2.376  | 30.8    | 0.1139 | 1.7603 |
| 4/20/2019 6:46 | 0.7    | -0.4083 | 4.8023 | -0.1333 | 2.371  | 30.9    | 0.1357 | 1.7467 |
| 4/20/2019 6:47 | 0.7    | -0.6    | 4.3392 | 0.1333  | 2.376  | 30.9091 | 0.1402 | 1.7487 |
| 4/20/2019 6:48 | 0.7    | 0.2583  | 4.3433 | -0.05   | 2.3807 | 31      | 0.1429 | 1.7787 |
| 4/20/2019 6:49 | 0.7    | -0.1083 | 4.6033 | -0.2667 | 2.3668 | 30.97   | 0.1411 | 1.7948 |
| 4/20/2019 6:50 | 0.7    | -0.4    | 4.4709 | -0.2    | 2.3942 | 30.93   | 0.1355 | 1.7989 |

|                |        |         |         |         |         |         |        |        |
|----------------|--------|---------|---------|---------|---------|---------|--------|--------|
| 4/20/2019 6:51 | 0.7    | -0.2667 | 4.4421  | -0.2333 | 2.3715  | 30.9636 | 0.1466 | 1.807  |
| 4/20/2019 6:52 | 0.7    | 0.275   | 4.5398  | -0.3    | 2.371   | 31      | 0.1284 | 1.794  |
| 4/20/2019 6:53 | 0.7    | -0.175  | 4.6232  | -0.2167 | 2.373   | 31      | 0.1354 | 1.7659 |
| 4/20/2019 6:54 | 0.7    | 0.1833  | 4.4269  | 0.1333  | 2.3853  | 31.0091 | 0.1246 | 1.807  |
| 4/20/2019 6:55 | 0.7    | 0.5917  | 4.3633  | -0.3167 | 2.3908  | 31.12   | 0.1381 | 1.8146 |
| 4/20/2019 6:56 | 0.7    | -0.0667 | 4.3528  | -0.7833 | 2.3669  | 31.28   | 0.1424 | 1.8058 |
| 4/20/2019 6:57 | 0.7    | -0.7917 | 4.6333  | -0.3667 | 2.3878  | 31.4    | 0.1298 | 1.7846 |
| 4/20/2019 6:58 | 0.7    | -0.0833 | 4.7007  | -0.4    | 2.3761  | 31.32   | 0.14   | 1.8058 |
| 4/20/2019 6:59 | 0.7    | 0.6917  | 4.5742  | -0.85   | 2.3825  | 31.37   | 0.1344 | 1.8027 |
| 4/20/2019 7:00 | 0.7    | -0.6167 | 4.7316  | -0.2667 | 2.3977  | 31.4    | 0.1349 | 1.8093 |
| 4/20/2019 7:01 | 0.7    | -1.0833 | 4.5068  | 0.05    | 2.4068  | 31.46   | 0.1456 | 1.8178 |
| 4/20/2019 7:02 | 0.7    | -0.75   | 4.5738  | -0.8167 | 2.4062  | 31.5    | 0.1355 | 1.8113 |
| 4/20/2019 7:03 | 0.7    | 0.325   | 4.5132  | 0.05    | 2.3925  | 31.5    | 0.1497 | 1.7878 |
| 4/20/2019 7:04 | 0.7    | 0.2417  | 4.6215  | -0.4    | 2.4017  | 31.5083 | 0.1321 | 1.777  |
| 4/20/2019 7:05 | 0.7    | -0.12   | 4.4288  | -0.64   | 2.405   | 31.6    | 0.1389 | 1.7598 |
| 4/20/2019 7:06 | 0.6583 | -0.0167 | 4.5511  | -0.45   | 2.4227  | 31.6    | 0.1399 | 1.7596 |
| 4/20/2019 7:07 | 0.7    | -0.1833 | 4.5487  | -0.45   | 2.4631  | 31.6    | 0.1333 | 1.7663 |
| 4/20/2019 7:08 | 0.7    | -0.26   | 4.3526  | 0.04    | 2.423   | 31.41   | 0.1503 | 1.7926 |
| 4/20/2019 7:09 | 0.7    | -1.1167 | 4.3854  | -0.4167 | 2.4377  | 31.0273 | 0.1272 | 1.8057 |
| 4/20/2019 7:10 | 0.7    | 0.5583  | 4.5258  | -0.1667 | 2.4448  | 30.9909 | 0.1432 | 1.8138 |
| 4/20/2019 7:11 | 0.6917 | 0.6     | 4.6163  | -0.5333 | 2.443   | 30.9    | 0.1379 | 1.8119 |
| 4/20/2019 7:12 | 0.7    | -0.3833 | 4.732   | -0.1167 | 2.4573  | 30.8    | 0.1319 | 1.8486 |
| 4/20/2019 7:13 | 0.7    | 0.0917  | 4.2986  | -0.3333 | 2.4601  | 30.6545 | 0.1429 | 1.8574 |
| 4/20/2019 7:14 | 0.7667 | -0.5583 | 4.3721  | -0.5167 | 2.443   | 30.56   | 0.1306 | 1.8339 |
| 4/20/2019 7:15 | 0.8    | -0.3    | 4.4453  | -0.25   | 2.4419  | 30.2546 | 0.1435 | 1.8366 |
| 4/20/2019 7:16 | 0.8083 | -0.0917 | 4.4981  | -0.35   | 2.4338  | 29.8182 | 0.1352 | 1.8051 |
| 4/20/2019 7:17 | 0.8    | -0.3    | 4.2823  | -0.5333 | 2.4503  | 28.5273 | 0.1384 | 1.8311 |
| 4/20/2019 7:18 | 0.8    | -0.7167 | 4.3405  | -0.5    | 2.4347  | 26.85   | 0.1423 | 1.8723 |
| 4/20/2019 7:19 | 0.8    | -0.2    | 4.4974  | -0.1167 | 2.4405  | 24.9636 | 0.1267 | 1.8723 |
| 4/20/2019 7:20 | 0.8167 | -0.3417 | 4.3756  | -0.3167 | 2.4336  | 23.2273 | 0.1469 | 1.8513 |
| 4/20/2019 7:21 | 0.8667 | -0.0667 | 4.3181  | -0.4167 | 2.434   | 21.5818 | 0.1334 | 1.8813 |
| 4/20/2019 7:22 | 0.8    | -0.05   | 4.5549  | -0.5    | 2.4338  | 19.9    | 0.1373 | 1.8652 |
| 4/20/2019 7:23 | 0.8333 | -1      | 4.3735  | -0.5    | 2.4172  | 18.0182 | 0.1497 | 1.8574 |
| 4/20/2019 7:24 | 0.8    | -0.7167 | 4.5662  | -0.8333 | 2.4458  | 16.23   | 0.1313 | 1.8578 |
| 4/20/2019 7:25 | 0.8    | -0.2583 | 4.4315  | -0.5333 | 2.4493  | 14.2546 | 0.1479 | 1.8553 |
| 4/20/2019 7:26 | 0.8    | -0.6917 | 4.359   | -0.85   | 2.4548  | 12.4546 | 0.1278 | 1.8973 |
| 4/20/2019 7:27 | 0.8    | 0.0833  | 4.3431  | -1.15   | 2.4781  | 10.6909 | 0.1446 | 1.8953 |
| 4/20/2019 7:28 | 0.8    | -0.45   | 4.2437  | 0.2     | 2.4582  | 9.27    | 0.1378 | 1.8985 |
| 4/20/2019 7:29 | 0.8    | -0.8667 | 4.5423  | 0.1333  | 2.4364  | 8.2545  | 0.1348 | 1.8893 |
| 4/20/2019 7:30 | 0.7083 | -0.3167 | 4.4541  | -0.2833 | 2.4196  | 8.0727  | 0.148  | 1.8768 |
| 4/20/2019 7:31 | 0.7    | -0.95   | 4.5167  | -0.6667 | 2.4343  | 7.9     | 0.1326 | 1.8982 |
| 4/20/2019 7:32 | 0.7    | -0.4667 | 4.4105  | -0.2167 | 3.2274  | 8.0818  | 0.153  | 1.9106 |
| 4/20/2019 7:33 | 0.6417 | -0.5417 | 6.2947  | 0.2333  | 8.3419  | 9.4583  | 0.2246 | 2.0504 |
| 4/20/2019 7:34 | 0.6167 | 0.1333  | 10.4369 | 0.6667  | 15.861  | 23.08   | 0.377  | 2.1413 |
| 4/20/2019 7:35 | 0.6167 | -0.2417 | 14.6725 | 2.0833  | 19.027  | 55.5636 | 0.5155 | 2.2207 |
| 4/20/2019 7:36 | 0.6333 | -0.2167 | 15.9392 | 1.8333  | 19.5575 | 58.75   | 1.2155 | 2.2165 |
| 4/20/2019 7:37 | 0.6    | 0.05    | 17.1133 | 2.75    | 20.1046 | 63.9    | 0.9971 | 2.0815 |

|                |        |         |         |        |         |         |        |        |
|----------------|--------|---------|---------|--------|---------|---------|--------|--------|
| 4/20/2019 7:38 | 0.6    | -0.4333 | 18.265  | 2.7    | 20.3269 | 66.5583 | 1.0237 | 2.0798 |
| 4/20/2019 7:39 | 0.6    | 0.4333  | 17.6225 | 2.1667 | 19.3141 | 62.55   | 0.8663 | 2.0828 |
| 4/20/2019 7:40 | 0.5667 | 0.4833  | 16.8358 | 2.2833 | 18.6261 | 60.29   | 0.824  | 2.0792 |
| 4/20/2019 7:41 | 0.525  | -0.2667 | 16.7958 | 2.8167 | 18.5479 | 60.2    | 0.8063 | 2.084  |
| 4/20/2019 7:42 | 0.575  | -0.2083 | 16.7525 | 1.9833 | 18.4059 | 60.3917 | 0.824  | 2.0862 |
| 4/20/2019 7:43 | 0.5917 | 0.0917  | 16.345  | 2.9    | 18.1991 | 59.9364 | 0.7824 | 2.1135 |
| 4/20/2019 7:44 | 0.6    | -0.3917 | 15.3633 | 2.2167 | 17.3444 | 58.1167 | 0.7578 | 2.12   |
| 4/20/2019 7:45 | 0.6    | -0.225  | 15.5825 | 2.6833 | 17.4035 | 55.8167 | 0.7444 | 2.096  |
| 4/20/2019 7:46 | 0.6167 | 0.2167  | 15.6042 | 2.0833 | 17.2247 | 57.3818 | 0.7469 | 2.114  |
| 4/20/2019 7:47 | 0.675  | 0.7167  | 15.4433 | 1.9333 | 16.9703 | 57.2917 | 0.75   | 2.0732 |
| 4/20/2019 7:48 | 0.7    | -0.525  | 14.7917 | 1.8333 | 16.4561 | 57.1545 | 0.7041 | 2.0642 |
| 4/20/2019 7:49 | 0.7    | 0.3417  | 14.9758 | 1.8333 | 16.5106 | 57.1    | 0.7345 | 2.0942 |
| 4/20/2019 7:50 | 0.7    | -0.5833 | 14.5667 | 1.9333 | 16.4287 | 57.0583 | 0.7183 | 2.1002 |
| 4/20/2019 7:51 | 0.7    | 0.3     | 14.3567 | 1.2333 | 16.0487 | 56.9167 | 0.6988 | 2.0898 |
| 4/20/2019 7:52 | 0.7    | 0.3167  | 13.8392 | 1.95   | 15.3596 | 56.5636 | 0.6972 | 2.0858 |
| 4/20/2019 7:53 | 0.6833 | 0.15    | 13.9025 | 2.2833 | 15.5026 | 56.2167 | 0.6898 | 2.1029 |
| 4/20/2019 7:54 | 0.7    | 0.575   | 13.5492 | 1.7833 | 15.2698 | 55.9    | 0.6962 | 2.0989 |
| 4/20/2019 7:55 | 0.7    | 0.4667  | 13.6742 | 1.6    | 15.211  | 55.6818 | 0.6894 | 2.1071 |
| 4/20/2019 7:56 | 0.7    | 0.675   | 13.3925 | 2.1    | 14.9086 | 55.4167 | 0.6868 | 2.1033 |
| 4/20/2019 7:57 | 0.7    | 0.7583  | 13.4317 | 1.85   | 14.8241 | 55.0909 | 0.6921 | 2.1058 |
| 4/20/2019 7:58 | 0.7    | 0.0833  | 13.0883 | 1.75   | 14.2979 | 54.7083 | 0.6515 | 2.1362 |
| 4/20/2019 7:59 | 0.7    | 0.8417  | 12.675  | 1.3    | 14.2122 | 54.39   | 0.6803 | 2.1373 |
| 4/20/2019 8:00 | 0.7    | 0.0667  | 12.955  | 1.7833 | 14.0915 | 54      | 0.6564 | 2.15   |
| 4/20/2019 8:01 | 0.7    | 0.0667  | 12.645  | 2.3167 | 13.8529 | 53.64   | 0.6712 | 2.1198 |
| 4/20/2019 8:02 | 0.7    | -0.25   | 12.4692 | 1.7    | 13.5796 | 53.2    | 0.6601 | 2.1038 |
| 4/20/2019 8:03 | 0.6583 | 0.4917  | 12.1708 | 1.9333 | 13.4093 | 52.71   | 0.6566 | 2.1307 |
| 4/20/2019 8:04 | 0.6    | 0.225   | 12.1517 | 2.15   | 13.2513 | 52.375  | 0.6526 | 2.0908 |
| 4/20/2019 8:05 | 0.5917 | -0.3083 | 12.0383 | 1.3667 | 12.9588 | 52.0273 | 0.6272 | 2.0932 |
| 4/20/2019 8:06 | 0.5917 | 0.4083  | 11.9967 | 1.8833 | 13.0172 | 51.7182 | 0.6505 | 2.108  |
| 4/20/2019 8:07 | 0.575  | 0.1583  | 11.6867 | 1.65   | 12.7989 | 51.425  | 0.6314 | 2.0865 |
| 4/20/2019 8:08 | 0.6    | 0.3583  | 11.6883 | 1.9833 | 12.6947 | 50.9727 | 0.6282 | 2.0773 |
| 4/20/2019 8:09 | 0.6    | -0.3167 | 11.7467 | 1.5667 | 12.6007 | 50.65   | 0.7004 | 2.0807 |
| 4/20/2019 8:10 | 0.6    | -0.4583 | 11.3733 | 1.1833 | 12.4349 | 50.39   | 0.6945 | 2.1031 |
| 4/20/2019 8:11 | 0.6    | 0.7417  | 11.545  | 0.9833 | 12.2358 | 50.1    | 0.7113 | 2.0888 |
| 4/20/2019 8:12 | 0.6    | 0.5417  | 11.2067 | 1.4167 | 12.1909 | 49.8636 | 0.6862 | 2.0808 |
| 4/20/2019 8:13 | 0.6    | -0.075  | 11.0517 | 1.2833 | 12.0632 | 49.5636 | 0.6963 | 2.0704 |
| 4/20/2019 8:14 | 0.6    | -0.6167 | 11.0967 | 1.5833 | 11.8747 | 49.2667 | 0.6905 | 2.1066 |
| 4/20/2019 8:15 | 0.6    | -0.1    | 11      | 1.1667 | 11.6536 | 49.0546 | 0.6705 | 2.1122 |
| 4/20/2019 8:16 | 0.6    | -0.2167 | 11.0533 | 1.1    | 11.3455 | 48.8    | 0.6767 | 2.141  |
| 4/20/2019 8:17 | 0.5833 | 0.1417  | 10.6317 | 1.1833 | 11.4182 | 48.76   | 0.6634 | 2.1182 |
| 4/20/2019 8:18 | 0.5    | 0.3     | 10.6283 | 1.1667 | 11.0908 | 48.4417 | 0.6595 | 2.1256 |
| 4/20/2019 8:19 | 0.5    | 0.075   | 10.5633 | 1.2    | 10.9433 | 48.0909 | 0.6549 | 2.1283 |
| 4/20/2019 8:20 | 0.5    | -0.0333 | 10.4217 | 1.1833 | 10.9134 | 47.9636 | 0.6565 | 2.1368 |
| 4/20/2019 8:21 | 0.5    | -0.2583 | 10.23   | 1.2167 | 10.7227 | 47.67   | 0.6563 | 2.1475 |
| 4/20/2019 8:22 | 0.5417 | -0.5667 | 10.3733 | 1.1667 | 10.701  | 47.3167 | 0.6395 | 2.0841 |
| 4/20/2019 8:23 | 0.5    | 0.175   | 10.3567 | 1.3333 | 10.6725 | 46.9091 | 0.6408 | 2.0755 |
| 4/20/2019 8:24 | 0.5    | 0.6083  | 10.0907 | 0.95   | 10.4296 | 46.6417 | 0.6367 | 2.0631 |

|                |        |         |         |        |         |         |        |        |
|----------------|--------|---------|---------|--------|---------|---------|--------|--------|
| 4/20/2019 8:25 | 0.5    | -0.3583 | 9.967   | 1.6167 | 10.2966 | 46.3    | 0.6337 | 2.0818 |
| 4/20/2019 8:26 | 0.5417 | -0.1917 | 9.9052  | 1.5333 | 10.1168 | 46.05   | 0.6353 | 2.1283 |
| 4/20/2019 8:27 | 0.55   | 0.3917  | 9.8048  | 0.9333 | 9.9935  | 45.73   | 0.6297 | 2.1051 |
| 4/20/2019 8:28 | 0.5    | -0.075  | 10.0585 | 1.2167 | 10.0322 | 45.6333 | 0.6314 | 2.1085 |
| 4/20/2019 8:29 | 0.5    | -0.2083 | 9.7957  | 0.7833 | 9.8751  | 45.35   | 0.6359 | 2.1088 |
| 4/20/2019 8:30 | 0.4333 | 0.575   | 9.6645  | 0.6333 | 9.6523  | 45.1    | 0.6222 | 2.1253 |
| 4/20/2019 8:31 | 0.4    | -0.6333 | 9.8735  | 0.6833 | 9.6013  | 44.9182 | 0.6224 | 2.1495 |
| 4/20/2019 8:32 | 0.4    | 0.3333  | 9.4947  | 0.8833 | 9.3714  | 44.7    | 0.6055 | 2.1331 |
| 4/20/2019 8:33 | 0.4    | 0.95    | 9.4915  | 1.1833 | 9.2777  | 44.3    | 0.6148 | 2.1018 |
| 4/20/2019 8:34 | 0.4    | 0.1417  | 9.5833  | 1.35   | 9.1673  | 44.0417 | 0.6082 | 2.1415 |
| 4/20/2019 8:35 | 0.4    | 0.1833  | 9.286   | 0.8333 | 9.0355  | 43.8364 | 0.5951 | 2.1298 |
| 4/20/2019 8:36 | 0.4    | -0.1417 | 9.1068  | 1.25   | 8.9085  | 43.62   | 0.607  | 2.1433 |
| 4/20/2019 8:37 | 0.4    | -0.025  | 9.3087  | 0.8833 | 8.8502  | 43.425  | 0.592  | 2.1427 |
| 4/20/2019 8:38 | 0.4    | -0.0833 | 9.0912  | 0.55   | 8.7542  | 43.1818 | 0.5986 | 2.0993 |
| 4/20/2019 8:39 | 0.45   | -0.125  | 9.5707  | 0.7333 | 8.7442  | 42.9583 | 0.6067 | 2.0873 |
| 4/20/2019 8:40 | 0.5    | 0.125   | 9.1252  | 0.1833 | 8.6559  | 43.0273 | 0.5923 | 2.1203 |
| 4/20/2019 8:41 | 0.5    | -0.1417 | 8.9165  | 0.8667 | 8.4978  | 43.3083 | 0.5989 | 2.1188 |
| 4/20/2019 8:42 | 0.5    | -0.05   | 8.8587  | 0.65   | 8.3648  | 43.0455 | 0.5789 | 2.1328 |
| 4/20/2019 8:43 | 0.5    | -0.9167 | 8.8357  | 0.4167 | 8.1988  | 42.725  | 0.5745 | 2.1214 |
| 4/20/2019 8:44 | 0.5    | -0.1667 | 8.896   | 0.6333 | 8.2748  | 42.5182 | 0.5948 | 2.105  |
| 4/20/2019 8:45 | 0.6    | -0.1917 | 8.6843  | 0.35   | 8.0969  | 42.325  | 0.575  | 2.0878 |
| 4/20/2019 8:46 | 0.6    | -0.475  | 8.5985  | 1.3    | 7.9417  | 42.1455 | 0.592  | 2.099  |
| 4/20/2019 8:47 | 0.6    | -0.2667 | 8.5368  | 0.7667 | 7.9063  | 41.9083 | 0.5737 | 2.1148 |
| 4/20/2019 8:48 | 0.5    | 0.3083  | 8.6805  | 0.8667 | 7.867   | 41.6818 | 0.5718 | 2.0996 |
| 4/20/2019 8:49 | 0.5    | 0.025   | 8.3625  | 0.5667 | 7.7349  | 41.4455 | 0.5714 | 2.0983 |
| 4/20/2019 8:50 | 0.5    | 0.2333  | 8.302   | 1.0333 | 7.5983  | 41.1333 | 0.5515 | 2.1042 |
| 4/20/2019 8:51 | 0.575  | 0.1917  | 8.173   | 0.9167 | 7.4419  | 40.7727 | 0.5546 | 2.1137 |
| 4/20/2019 8:52 | 0.6    | 0.5583  | 8.2065  | 0.8167 | 7.4374  | 40.3727 | 0.5512 | 2.0992 |
| 4/20/2019 8:53 | 0.6    | -0.4667 | 8.2167  | 1.0667 | 7.4071  | 39.4083 | 0.548  | 2.0842 |
| 4/20/2019 8:54 | 0.6    | 0.2167  | 8.2378  | 0.5833 | 7.3782  | 39.1909 | 0.5393 | 2.0962 |
| 4/20/2019 8:55 | 0.6    | 0.3333  | 8.0388  | 0.5667 | 7.2006  | 38.9333 | 0.487  | 2.1238 |
| 4/20/2019 8:56 | 0.575  | -0.35   | 8.0295  | 1.4667 | 7.1505  | 38.5833 | 0.4891 | 2.1189 |
| 4/20/2019 8:57 | 0.6167 | 0.1083  | 7.957   | 1.2833 | 7.501   | 38.1545 | 0.4666 | 1.8898 |
| 4/20/2019 8:58 | 0.85   | 1.175   | 7.6493  | 1.45   | 8.1169  | 37.1818 | 0.4294 | 1.7413 |
| 4/20/2019 8:59 | 1.125  | 1.1     | 7.5508  | 1.8    | 8.6122  | 36.275  | 0.4066 | 1.7303 |
| 4/20/2019 9:00 | 1.4917 | 1.6583  | 7.3072  | 1.65   | 9.0239  | 35.4167 | 0.3784 | 1.6719 |
| 4/20/2019 9:01 | 1.9417 | 3.2667  | 7.4913  | 2.7833 | 9.3265  | 35.0273 | 0.334  | 1.5926 |
| 4/20/2019 9:02 | 2.35   | 2.2083  | 7.3997  | 3.2167 | 9.8501  | 34.1636 | 0.3385 | 1.5744 |
| 4/20/2019 9:03 | 2.65   | 2.4917  | 7.0665  | 2.8667 | 10.4463 | 33.4667 | 0.329  | 1.5788 |
| 4/20/2019 9:04 | 2.525  | 1.6167  | 6.2698  | 2.4833 | 10.8653 | 32.9909 | 0.3343 | 1.5808 |
| 4/20/2019 9:05 | 2.4417 | 2.025   | 6.438   | 2.3333 | 11.4079 | 32.35   | 0.3227 | 1.5304 |
| 4/20/2019 9:06 | 2.4917 | 2.7667  | 6.4117  | 3.0333 | 11.7061 | 32.0455 | 0.3042 | 1.5684 |
| 4/20/2019 9:07 | 2.7333 | 3.1083  | 6.6637  | 3.45   | 11.8817 | 31.5833 | 0.2879 | 1.5883 |
| 4/20/2019 9:08 | 3.05   | 2.7167  | 6.6668  | 3.3833 | 11.6798 | 31.2    | 0.269  | 1.5251 |
| 4/20/2019 9:09 | 3.2917 | 3.55    | 6.7238  | 3.4833 | 11.7836 | 30.2833 | 0.2839 | 1.4635 |
| 4/20/2019 9:10 | 3.5917 | 4.1167  | 7.1638  | 3.7333 | 11.8629 | 29.4364 | 0.2828 | 1.427  |
| 4/20/2019 9:11 | 3.8583 | 4.1583  | 7.0932  | 4.25   | 11.9722 | 28.5455 | 0.2755 | 1.4464 |

|                |        |         |          |         |         |          |        |        |
|----------------|--------|---------|----------|---------|---------|----------|--------|--------|
| 4/20/2019 9:12 | 4.15   | 4.5833  | 7.6678   | 4.25    | 12.1281 | 28.0445  | 0.2805 | 1.415  |
| 4/20/2019 9:13 | 4.3667 | 4.475   | 7.4862   | 4.75    | 12.1304 | 27.1273  | 0.2536 | 1.4366 |
| 4/20/2019 9:14 | 4.675  | 5.0083  | 8.021    | 5.3833  | 11.9252 | 26.2909  | 0.2362 | 1.4447 |
| 4/20/2019 9:15 | 4.9    | 5.4     | 7.8793   | 6.0667  | 11.7783 | 26.1     | 0.2365 | 1.4263 |
| 4/20/2019 9:16 | 5.1417 | 5.0333  | 8.0432   | 5.95    | 11.6437 | 25.0455  | 0.2088 | 1.4543 |
| 4/20/2019 9:17 | 5.3333 | 5.3083  | 8.0315   | 5.8833  | 11.47   | 24.58    | 0.2115 | 1.4233 |
| 4/20/2019 9:18 | 5.65   | 6.7167  | 8.9228   | 7.5667  | 10.8677 | 23.75    | 0.211  | 1.4085 |
| 4/20/2019 9:19 | 5.975  | 6.5     | 8.758    | 6.8833  | 10.6161 | 22.85    | 0.2021 | 1.4013 |
| 4/20/2019 9:20 | 6.3417 | 7.4417  | 8.9722   | 7.4     | 10.3326 | 21.6667  | 0.2121 | 1.4046 |
| 4/20/2019 9:21 | 6.5167 | 6.8583  | 8.9535   | 7.2667  | 10.35   | 20.96    | 0.2144 | 1.3855 |
| 4/20/2019 9:22 | 6.8083 | 7.175   | 9.2102   | 7.2833  | 10.0785 | 20.8636  | 0.1813 | 1.396  |
| 4/20/2019 9:23 | 7.1167 | 7.55    | 9.7528   | 8.1833  | 10.035  | 20.6455  | 0.1913 | 1.3695 |
| 4/20/2019 9:24 | 7.5333 | 8.3667  | 10.0007  | 8.5833  | 9.9577  | 20.2417  | 0.1832 | 1.3832 |
| 4/20/2019 9:25 | 7.975  | 9.2083  | 10.2113  | 8.5333  | 9.1305  | 19.6545  | 0.161  | 1.3996 |
| 4/20/2019 9:26 | 8.275  | 9.9333  | 10.985   | 9.6167  | 8.6925  | 19.1667  | 0.1773 | 1.3868 |
| 4/20/2019 9:27 | 8.6917 | 9.5833  | 11.005   | 10.15   | 8.2419  | 18.6333  | 0.1614 | 1.3608 |
| 4/20/2019 9:28 | 8.9583 | 9.1     | 10.975   | 9.1     | 8.2273  | 18.2818  | 0.1556 | 1.3651 |
| 4/20/2019 9:29 | 9.275  | 10.0833 | 11.6717  | 10.3667 | 7.8259  | 17.5333  | 0.166  | 1.3579 |
| 4/20/2019 9:30 | 9.5083 | 9.9083  | 11.6083  | 10.3    | 7.6598  | 16.7333  | 0.1478 | 1.3763 |
| 4/20/2019 9:31 | 9.6833 | 9.8167  | 11.495   | 10.1167 | 7.6541  | 16.225   | 0.157  | 1.3818 |
| 4/20/2019 9:32 | 9.7    | 9.8583  | 11.4033  | 9.9167  | 7.5105  | 15.8909  | 0.1666 | 1.4253 |
| 4/20/2019 9:33 | 9.4667 | 9.6     | 11.1617  | 9.5667  | 7.5877  | 15.6083  | 0.1611 | 1.4281 |
| 4/20/2019 9:34 | 9.1917 | 8.5667  | 10.845   | 9.0333  | 7.5413  | 15.2417  | 0.1682 | 1.4181 |
| 4/20/2019 9:35 | 8.8833 | 8.5917  | 10.4625  | 8.4833  | 7.5425  | 14.9167  | 0.1699 | 1.4066 |
| 4/20/2019 9:36 | 8.5917 | 8.7667  | 10.2275  | 8.5333  | 7.4998  | 14.77    | 0.1593 | 1.4412 |
| 4/20/2019 9:37 | 8.3833 |         | 9.8118   | 8.6333  | 7.5172  | 14.6364  | 0.1669 | 1.4292 |
| 4/20/2019 9:38 | 8.1417 |         | 9.7168   | 8       | 7.4708  | 14.625   | 0.1675 | 1.4343 |
| 4/20/2019 9:39 | 7.9417 |         | 9.4882   | 7.7167  | 7.4442  | 14.5455  | 0.1597 | 1.42   |
| 4/20/2019 9:40 | 7.6833 |         | 9.3533   | 7.2     | 7.4259  | 14.325   | 0.1749 | 1.4202 |
| 4/20/2019 9:41 | 7.4583 |         | 9.2207   | 7.15    | 7.4097  | 14.2818  | 0.1676 | 1.4353 |
| 4/20/2019 9:42 | 7.1917 |         | 9.0427   | 6.4333  | 7.3788  | 14.5546  | 0.1675 | 1.426  |
| 4/20/2019 9:43 | 6.9833 |         | 8.7557   | 7.4333  | 7.3367  | 14.4455  | 0.1759 | 1.4353 |
| 4/20/2019 9:44 | 6.825  |         | 8.8442   | 6.25    | 7.3152  | 14.6083  | 0.1581 | 1.4779 |
| 4/20/2019 9:45 | 6.6583 |         | 8.729    | 6.1     | 7.3058  | 14.6727  | 0.175  | 1.4988 |
| 4/20/2019 9:46 | 6.4818 |         | 8.5959   | 6.4167  | 7.2689  | 14.9167  | 0.177  | 1.5    |
| 4/20/2019 9:47 | 6.2583 |         | 8.098    | 5.9333  | 8.2103  | 15.4818  | 0.1799 | 1.5123 |
| 4/20/2019 9:48 | 5.7333 | 8.4167  | 11.9995  | 5.8833  | 11.5518 | 16.2364  | 0.2314 | 1.6909 |
| 4/20/2019 9:49 | 4.8667 | 9.0083  | 25.93    | 9.0333  | 24.8806 | 17.78    | 0.3604 | 1.9832 |
| 4/20/2019 9:50 | 3.5917 | 9.6667  | 45.8017  | 14      | 35.3703 | 31.4546  | 0.5707 | 1.98   |
| 4/20/2019 9:51 | 2.325  | 8.7     | 70.8525  | 19.9167 | 47.7448 | 76.2     | 0.9103 | 2.1606 |
| 4/20/2019 9:52 | 1.2833 | 10.3667 | 94.4867  | 26.4333 | 53.9497 | 96.4364  | 1.1791 | 2.2818 |
| 4/20/2019 9:53 | 0.7167 | 6.1583  | 110.4833 | 29.5    | 58.4774 | 113.2833 | 1.5385 | 2.4584 |
| 4/20/2019 9:54 | 0.5167 | 5.8583  | 146.8417 | 38.45   | 61.5984 | 138      | 3.7405 | 2.4818 |
| 4/20/2019 9:55 | 0.4833 | 7.25    | 156.4333 | 38.7167 | 59.7995 | 154.6917 | 4.2258 | 2.5347 |
| 4/20/2019 9:56 | 0.5    | 8.3667  | 137.9667 | 34.5167 | 58.4803 | 154.6909 | 3.5436 | 2.5297 |
| 4/20/2019 9:57 | 0.5    | 10.0833 | 134.7667 | 34.45   | 57.9718 | 155.2364 | 3.8027 | 2.523  |
| 4/20/2019 9:58 | 0.5    | 4.9333  | 125.5917 | 32.9167 | 56.7471 | 148.9182 | 3.2849 | 2.513  |



|                 |        |        |          |         |         |          |        |        |
|-----------------|--------|--------|----------|---------|---------|----------|--------|--------|
| 4/20/2019 9:59  | 0.5417 | 4.0571 | 120.45   | 32.0167 | 55.7309 | 151.1455 | 3.1614 | 2.5061 |
| 4/20/2019 10:00 | 0.5    | 4.3909 | 125.1083 | 33.0333 | 55.4703 | 154.1182 | 3.5884 | 2.4993 |
| 4/20/2019 10:01 | 0.5    | 4.8667 | 119.3    | 31.25   | 54.4693 | 147.15   | 3.3658 | 2.4915 |
| 4/20/2019 10:02 | 0.5083 | 4.5    | 120.15   | 31.45   | 53.7625 | 136.5636 | 3.5473 | 2.4824 |
| 4/20/2019 10:03 | 0.6    | 4.1667 | 108.7167 | 30.05   | 52.5603 | 138.1417 | 3.064  | 2.5117 |
| 4/20/2019 10:04 | 0.6    | 4.25   | 103.4083 | 30.1667 | 51.6147 | 144.79   | 2.7643 | 2.494  |
| 4/20/2019 10:05 | 0.5833 | 3.9333 | 102.9833 | 29.6667 | 51.4873 | 134.0455 | 2.8123 | 2.472  |
| 4/20/2019 10:06 | 0.5    | 4.4167 | 98.9417  | 29.2667 | 50.5873 | 133.525  | 2.6418 | 2.5145 |
| 4/20/2019 10:07 | 0.5    | 4.1    | 96.7875  | 29.0167 | 49.7227 | 128.9    | 2.5836 | 2.5051 |
| 4/20/2019 10:08 | 0.5167 | 3.7167 | 93.5317  | 28.3333 | 48.9108 | 135.95   | 2.5804 | 2.4844 |
| 4/20/2019 10:09 | 0.6    | 4.4833 | 92.0217  | 27.4667 | 48.4924 | 133.375  | 2.593  | 2.4795 |
| 4/20/2019 10:10 | 0.6    | 4.0167 | 87.3875  | 27.1    | 46.3048 | 119.1917 | 2.4815 | 2.4718 |
| 4/20/2019 10:11 | 0.6    | 3.6    | 85.13    | 27.0167 | 45.2563 | 110.9083 | 2.3878 | 2.4618 |
| 4/20/2019 10:12 | 0.5667 | 3.8333 | 85.0808  | 26.3667 | 45.2091 | 113.0667 | 2.4458 | 2.4905 |
| 4/20/2019 10:13 | 0.5    | 4.1167 | 83.5042  | 25.8667 | 44.4765 | 112.9545 | 2.44   | 2.491  |
| 4/20/2019 10:14 | 0.5    | 3.8667 | 82.8367  | 25.5833 | 44.1287 | 115      | 2.443  | 2.4486 |
| 4/20/2019 10:15 | 0.5167 | 3.7167 | 80.9967  | 25.3667 | 43.1289 | 117.4583 | 2.4053 | 2.4433 |
| 4/20/2019 10:16 | 0.6    | 3.9167 | 80.2758  | 24.65   | 42.8713 | 117.3583 | 2.3477 | 2.4266 |
| 4/20/2019 10:17 | 0.6    | 3.5    | 80.0483  | 25.1    | 42.5519 | 116.2091 | 2.4012 | 2.4296 |
| 4/20/2019 10:18 | 0.6    | 3.45   | 78.0117  | 24.7    | 41.6078 | 115.6818 | 2.3752 | 2.4588 |
| 4/20/2019 10:19 | 0.6    | 3.5167 | 75.1783  | 24.2    | 40.3578 | 115.1545 | 2.337  | 2.46   |
| 4/20/2019 10:20 | 0.5833 | 3.05   | 74.955   | 23.95   | 39.8403 | 114.2636 | 2.3148 | 2.4742 |
| 4/20/2019 10:21 | 0.6    | 3.3167 | 74.82    | 23.4333 | 39.7208 | 113.3167 | 2.314  | 2.4737 |
| 4/20/2019 10:22 | 0.6    | 3.6167 | 74.1275  | 23.1833 | 39.5298 | 112.7182 | 2.3347 | 2.4533 |
| 4/20/2019 10:23 | 0.6    | 4.0667 | 73.9967  | 22.95   | 39.3568 | 112.25   | 2.32   | 2.4625 |
| 4/20/2019 10:24 | 0.6583 | 3.1667 | 73.2642  | 23.1167 | 39.203  | 111.9    | 2.3018 | 2.4443 |
| 4/20/2019 10:25 | 0.7    | 3.45   | 70.7     | 22.4    | 39.1521 | 110.97   | 2.2483 | 2.4518 |
| 4/20/2019 10:26 | 0.7    | 3.1    | 69.8417  | 22.4833 | 37.3417 | 109.8417 | 2.2237 | 2.4268 |
| 4/20/2019 10:27 | 0.7    | 3.4833 | 68.2783  | 21.7    | 36.1853 | 109.5444 | 2.179  | 2.4217 |
| 4/20/2019 10:28 | 0.7    | 3.2833 | 67.7583  | 21.0333 | 35.839  | 107.9583 | 2.2047 | 2.4337 |
| 4/20/2019 10:29 | 0.6333 | 2.75   | 66.825   | 22.1333 | 35.2197 | 107.2909 | 2.2185 | 2.4465 |
| 4/20/2019 10:30 | 0.6    | 3.0333 | 64.4583  | 20.7833 | 34.196  | 108.0917 | 2.1885 | 2.4502 |
| 4/20/2019 10:31 | 0.6    | 3.1667 | 64.6683  | 21      | 34.1752 | 108.51   | 2.1435 | 2.4819 |
| 4/20/2019 10:32 | 0.6    | 3.1167 | 64.6742  | 20.7167 | 33.9628 | 109.1167 | 2.175  | 2.4593 |
| 4/20/2019 10:33 | 0.6    | 3.3333 | 64.5725  | 20.5333 | 33.9118 | 108.8727 | 2.1775 | 2.4439 |
| 4/20/2019 10:34 | 0.6    | 3.0333 | 62.6117  | 19.7167 | 32.9917 | 109.475  | 2.1308 | 2.4618 |
| 4/20/2019 10:35 | 0.6    | 2.0833 | 61.4083  | 19.6833 | 32.2288 | 109.32   | 2.1997 | 2.4137 |
| 4/20/2019 10:36 | 0.6    | 3.2333 | 60.7958  | 19.45   | 31.7395 | 108.5167 | 2.1495 | 2.4351 |
| 4/20/2019 10:37 | 0.6333 | 2.3833 | 59.4467  | 19.2833 | 31.3543 | 108.1333 | 2.0495 | 2.4709 |
| 4/20/2019 10:38 | 0.7    | 3.6833 | 59.3925  | 18.9167 | 31.1403 | 108.4667 | 2.0575 | 2.4408 |
| 4/20/2019 10:39 | 0.6417 | 2.85   | 59.4267  | 19.3833 | 30.6893 | 107.2545 | 2.046  | 2.4353 |
| 4/20/2019 10:40 | 0.6    | 2.8667 | 58.9458  | 18.6667 | 30.2942 | 108.15   | 2.0718 | 2.428  |
| 4/20/2019 10:41 | 0.6    | 2.25   | 57.6525  | 18.15   | 29.8718 | 108.4818 | 2.0067 | 2.4322 |
| 4/20/2019 10:42 | 0.6    | 2.1333 | 56.7425  | 18.2    | 29.2039 | 107.725  | 2.0298 | 2.4352 |
| 4/20/2019 10:43 | 0.5833 | 2.4333 | 57.0483  | 18.1333 | 29.2723 | 107.3167 | 2.108  | 2.3866 |
| 4/20/2019 10:44 | 0.575  | 2.2333 | 55.8725  | 18.0833 | 28.5583 | 106.5273 | 2.049  | 2.3762 |
| 4/20/2019 10:45 | 0.5833 | 2.4333 | 55.4067  | 18.05   | 28.3411 | 106.9417 | 2.01   | 2.4165 |

|                 |        |         |         |         |         |          |        |        |
|-----------------|--------|---------|---------|---------|---------|----------|--------|--------|
| 4/20/2019 10:46 | 0.5167 | 2.9833  | 54.9125 | 17.8333 | 27.831  | 107.1818 | 1.9948 | 2.4343 |
| 4/20/2019 10:47 | 0.525  | 1.6833  | 54.6208 | 17.4333 | 27.7559 | 106.8    | 1.9253 | 2.4073 |
| 4/20/2019 10:48 | 0.5    | 2.2833  | 54.1858 | 16.6333 | 27.4554 | 106.9333 | 1.9848 | 2.4207 |
| 4/20/2019 10:49 | 0.5    | 2.2667  | 53.5883 | 16.45   | 27.0331 | 107.1333 | 2.0025 | 2.4503 |
| 4/20/2019 10:50 | 0.5    | 2.1333  | 52.8258 | 16.4167 | 26.6138 | 107.225  | 1.982  | 2.4111 |
| 4/20/2019 10:51 | 0.5    | 2.2167  | 52.0325 | 16.8833 | 26.0457 | 108.0667 | 1.902  | 2.4293 |
| 4/20/2019 10:52 | 0.5    | 2.4167  | 52.1017 | 16.4    | 25.9621 | 107.925  | 1.9315 | 2.4303 |
| 4/20/2019 10:53 | 0.4667 | 2.6167  | 50.22   | 16.2833 | 25.1356 | 107.5167 | 1.9477 | 2.4243 |
| 4/20/2019 10:54 | 0.5    | 2.15    | 50.9742 | 16.55   | 25.322  | 107.6111 | 1.9122 | 2.4243 |
| 4/20/2019 10:55 | 0.5    | 2       | 49.0492 | 16.0833 | 24.3388 | 106.6167 | 1.9162 | 2.421  |
| 4/20/2019 10:56 | 0.5    | 1.6833  | 49.3367 | 15.3667 | 24.3311 | 105.5571 | 1.8795 | 2.474  |
| 4/20/2019 10:57 | 0.4917 | 1.95    | 48.4408 | 15.1833 | 23.8572 | 104.8286 | 1.8812 | 2.4304 |
| 4/20/2019 10:58 | 0.5    | 2.35    | 48.435  | 15.1833 | 23.6889 | 104.0455 | 1.8973 | 2.3922 |
| 4/20/2019 10:59 | 0.5    | 1.8333  | 46.8242 | 15.1667 | 22.9688 | 103.1333 | 1.7835 | 2.4    |
| 4/20/2019 11:00 | 0.6    | 2.2333  | 48.08   | 14.9    | 23.3812 | 101.62   | 1.8562 | 2.3984 |
| 4/20/2019 11:01 | 0.6    | 1.8833  | 46.9908 | 14.5167 | 22.8531 | 101.275  | 1.8047 | 2.3854 |
| 4/20/2019 11:02 | 0.6    | 1.5667  | 46.8258 | 14.8167 | 22.6832 | 100.3167 | 1.82   | 2.355  |
| 4/20/2019 11:03 | 0.6    | 2.0167  | 46.01   | 14.1333 | 22.2017 | 84.275   | 1.8263 | 2.3636 |
| 4/20/2019 11:04 | 0.5583 | 0.9333  | 46.18   | 14.7667 | 22.311  | 80.6364  | 1.8603 | 2.3906 |
| 4/20/2019 11:05 | 0.5    | 1.6167  | 45.0483 | 13.8833 | 21.6335 | 98.7273  | 1.8468 | 2.4377 |
| 4/20/2019 11:06 | 0.5167 | 2.5833  | 43.5017 | 13.5    | 20.9735 | 98.625   | 1.768  | 2.4313 |
| 4/20/2019 11:07 | 0.5333 | 1.6833  | 44.2083 | 14.0167 | 21.1353 | 82.4364  | 1.7388 | 2.4088 |
| 4/20/2019 11:08 | 0.5    | 1.9833  | 44.1167 | 14.1    | 21.0127 | 58.48    | 1.7417 | 2.415  |
| 4/20/2019 11:09 | 0.5    | 1.1333  | 43.6617 | 13.6333 | 20.6615 | 62.5182  | 1.6595 | 2.44   |
| 4/20/2019 11:10 | 0.5083 | 1.4333  | 40.005  | 12.1833 | 19.2058 | 59.9364  | 1.6055 | 2.4198 |
| 4/20/2019 11:11 | 0.6    | 1.3667  | 37.6167 | 11.9    | 18.5049 | 62.2667  | 1.5022 | 2.443  |
| 4/20/2019 11:12 | 0.6    | 1.3333  | 38.3067 | 11.85   | 19.4863 | 58.6455  | 1.4948 | 2.2991 |
| 4/20/2019 11:13 | 0.6917 | 1.4     | 34.0067 | 10.05   | 19.6686 | 62.5667  | 1.3972 | 2.1009 |
| 4/20/2019 11:14 | 0.8417 | 2.6167  | 29.7283 | 9.6833  | 20.2384 | 76.2818  | 1.2402 | 1.9428 |
| 4/20/2019 11:15 | 1.0583 | 1.8833  | 27.23   | 9.65    | 20.4194 | 72.03    | 1.1473 | 1.889  |
| 4/20/2019 11:16 | 1.4    | 3.6     | 24.0333 | 9.9833  | 20.3872 | 71.3182  | 1.0291 | 1.7751 |
| 4/20/2019 11:17 | 1.7417 | 2.8833  | 22.135  | 9.3167  | 20.1763 | 70.6546  | 0.9475 | 1.8334 |
| 4/20/2019 11:18 | 2.15   | 4.0667  | 20.07   | 9.2667  | 19.8628 | 69.8083  | 0.8799 | 1.8552 |
| 4/20/2019 11:19 | 2.55   | 4.3333  | 18.125  | 9.1667  | 19.5372 | 68.55    | 0.7905 | 1.8138 |
| 4/20/2019 11:20 | 3.0167 | 5.05    | 17.11   | 9.75    | 19.1268 | 66.8364  | 0.7447 | 1.7971 |
| 4/20/2019 11:21 | 3.4667 | 5.5667  | 15.8467 | 9.05    | 18.6144 | 64.5273  | 0.6884 | 1.7854 |
| 4/20/2019 11:22 | 4.175  | 7.25    | 15.2433 | 9.8     | 17.1402 | 62.4     | 0.6289 | 1.7432 |
| 4/20/2019 11:23 | 4.7667 | 7.0333  | 14.685  | 9.8667  | 16.858  | 60.24    | 0.616  | 1.6934 |
| 4/20/2019 11:24 | 5.2917 | 7.4167  | 14.5817 | 9.85    | 16.4216 | 57.8583  | 0.5734 | 1.6827 |
| 4/20/2019 11:25 | 5.6917 | 7.55    | 14.6483 | 10.7667 | 15.97   | 55.2727  | 0.5223 | 1.6535 |
| 4/20/2019 11:26 | 6.1833 | 9.2167  | 14.1033 | 11.0833 | 15.9474 | 52.6917  | 0.4976 | 1.6297 |
| 4/20/2019 11:27 | 6.9    | 9.8     | 14.05   | 12.1167 | 13.926  | 49.8083  | 0.4427 | 1.575  |
| 4/20/2019 11:28 | 7.425  | 10.05   | 14.3833 | 12.2833 | 12.6968 | 47.1727  | 0.4451 | 1.5341 |
| 4/20/2019 11:29 | 7.9917 | 10.2    | 14.47   | 12.2833 | 11.8497 | 44.55    | 0.4141 | 1.4997 |
| 4/20/2019 11:30 | 8.3167 | 10.8833 | 14.4267 | 12      | 11.3888 | 42.2364  | 0.4003 | 1.5097 |
| 4/20/2019 11:31 | 8.825  | 11.8333 | 14.5867 | 13.8    | 10.6453 | 40.2917  | 0.3912 | 1.4998 |
| 4/20/2019 11:32 | 9.4583 | 12.6833 | 14.6917 | 13.9833 | 9.7894  | 38.4909  | 0.3495 | 1.4755 |

|                 |         |         |         |         |        |         |        |        |
|-----------------|---------|---------|---------|---------|--------|---------|--------|--------|
| 4/20/2019 11:33 | 9.9583  | 12.2667 | 15.075  | 14.0667 | 9.5953 | 37.35   | 0.3523 | 1.4603 |
| 4/20/2019 11:34 | 10.5167 | 13.65   | 15.6867 | 15.25   | 8.8595 | 36.11   | 0.3222 | 1.4475 |
| 4/20/2019 11:35 | 11.0333 | 15.3    | 15.835  | 15.95   | 8.334  | 34.9273 | 0.2958 | 1.4734 |
| 4/20/2019 11:36 | 11.775  | 14.7333 | 16.1617 | 15.8667 | 7.7408 | 33.525  | 0.2985 | 1.4295 |
| 4/20/2019 11:37 | 12.4167 | 15.6333 | 16.58   | 16.3167 | 7.2573 | 32.4182 | 0.2718 | 1.4243 |
| 4/20/2019 11:38 | 12.875  | 15.7167 | 16.9833 | 16.65   | 6.9331 | 31.2417 | 0.2614 | 1.4466 |
| 4/20/2019 11:39 | 13.2667 | 16.3667 | 17.525  | 17.0333 | 6.6181 | 30.35   | 0.2634 | 1.4388 |
| 4/20/2019 11:40 | 13.6333 | 17.45   | 17.2533 | 17.3333 | 6.189  | 29.35   | 0.2363 | 1.4387 |
| 4/20/2019 11:41 | 14.15   | 17.3167 | 17.695  | 18.4    | 5.8495 | 28.42   | 0.2362 | 1.4311 |
| 4/20/2019 11:42 | 14.6583 | 17.1833 | 18.51   | 18.6167 | 5.6183 | 27.5417 | 0.2274 | 1.4103 |
| 4/20/2019 11:43 | 15.1    | 17.1167 | 18.2317 | 18.4    | 5.3893 | 26.7364 | 0.2111 | 1.4148 |
| 4/20/2019 11:44 | 15.3583 | 17.2167 | 18.5317 | 18.15   | 5.2266 | 26.0667 | 0.2266 | 1.4077 |
| 4/20/2019 11:45 | 15.6417 | 18.2333 | 18.6933 | 19.0667 | 4.991  | 25.4273 | 0.1993 | 1.373  |
| 4/20/2019 11:46 | 15.8917 | 18.65   | 18.965  | 18.9833 | 4.8371 | 24.7546 | 0.2003 | 1.3718 |
| 4/20/2019 11:47 | 16.25   | 18.75   | 18.8183 | 19.3167 | 4.6966 | 23.9273 | 0.2056 | 1.3678 |
| 4/20/2019 11:48 | 16.4333 | 18.7    | 19.1283 | 19.5    | 4.5846 | 23.3167 | 0.1823 | 1.3768 |
| 4/20/2019 11:49 | 16.65   | 19.4    | 19.26   | 19.2833 | 4.4157 | 22.7636 | 0.1919 | 1.3963 |
| 4/20/2019 11:50 | 16.85   | 19.0667 | 19.4317 | 19.6833 | 4.2615 | 21.9727 | 0.1766 | 1.3731 |
| 4/20/2019 11:51 | 16.8667 | 18.7167 | 18.6467 | 18.85   | 4.2502 | 21.3667 | 0.175  | 1.3479 |
| 4/20/2019 11:52 | 16.9917 | 19.3833 | 19.255  | 18.9167 | 4.0567 | 20.7818 | 0.1857 | 1.331  |
| 4/20/2019 11:53 | 17.0083 | 18.85   | 19.505  | 19.1833 | 3.9807 | 20.0182 | 0.1662 | 1.3403 |
| 4/20/2019 11:54 | 17.2    | 18.7    | 19.52   | 19.9    | 3.8799 | 19.2364 | 0.1625 | 1.346  |
| 4/20/2019 11:55 | 17.425  | 19.4667 | 19.5867 | 19.55   | 3.8063 | 18.5917 | 0.1732 | 1.3468 |
| 4/20/2019 11:56 | 17.775  | 19.6167 | 19.9283 | 20.15   | 3.7403 | 17.8727 | 0.1534 | 1.3371 |
| 4/20/2019 11:57 | 17.9917 | 19.7833 | 20.04   | 20.05   | 3.7401 | 17.0333 | 0.1716 | 1.3319 |
| 4/20/2019 11:58 | 18.15   | 19.3833 | 20.09   | 20.6    | 3.7113 | 16.4091 | 0.1658 | 1.2768 |
| 4/20/2019 11:59 | 18.375  | 20.1833 | 20.3467 | 20.7667 | 3.6559 | 16.1727 | 0.1504 | 1.3483 |
| 4/20/2019 12:00 | 18.575  | 20.2333 | 20.4367 | 20.7833 | 3.619  | 16.1167 | 0.1514 | 1.5057 |
| 4/20/2019 12:01 | 18.5333 | 19.5167 | 19.67   | 19.3    | 3.6209 | 16.075  | 0.1627 | 1.3346 |
| 4/20/2019 12:02 | 18.3917 | 20.8667 | 20.29   | 20.1    | 3.5997 | 16.225  | 0.1508 | 1.3327 |
| 4/20/2019 12:03 | 18.3417 | 19.9667 | 20.4283 | 20.5333 | 3.5753 | 16.2667 | 0.1575 | 1.3235 |
| 4/20/2019 12:04 | 18.45   | 19.75   | 20.4283 | 20.5167 | 3.5563 | 16.1833 | 0.1418 | 1.3181 |
| 4/20/2019 12:05 | 18.65   | 20.9833 | 20.75   | 20.7333 | 3.4636 | 16.4833 | 0.148  | 1.3152 |
| 4/20/2019 12:06 | 18.9333 | 21.2167 | 21.235  | 21.4167 | 3.3959 | 16.975  | 0.1567 | 1.3223 |
| 4/20/2019 12:07 | 19.2167 | 21.1833 | 20.9067 | 21.2333 | 3.3667 | 17.2167 | 0.1379 | 1.3237 |
| 4/20/2019 12:08 | 19.475  | 20.8833 | 21.655  | 21.6333 | 3.3296 | 17.42   | 0.1541 | 1.3116 |
| 4/20/2019 12:09 | 19.5833 | 21.0667 | 21.6067 | 21.2    | 3.2758 | 18.0333 | 0.146  | 1.3439 |
| 4/20/2019 12:10 | 19.8583 | 22.2167 | 21.5283 | 21.4167 | 3.2658 | 18.375  | 0.1448 | 1.3355 |
| 4/20/2019 12:11 | 19.9333 | 21.2667 | 21.165  | 21.6833 | 3.2784 | 18.5    | 0.1529 | 1.3277 |
| 4/20/2019 12:12 | 20.025  | 22.2333 | 21.635  | 21.6833 | 3.2583 | 18.425  | 0.1414 | 1.3333 |
| 4/20/2019 12:13 | 20.0583 | 21.9833 | 21.8483 | 21.6333 | 3.2316 | 18.3917 | 0.1397 | 1.3275 |
| 4/20/2019 12:14 | 20.125  | 21.7667 | 21.8817 | 21.5667 | 3.2697 | 18.3    | 0.1419 | 1.3106 |
| 4/20/2019 12:15 | 20.275  | 22.1167 | 21.86   | 22.2167 | 3.406  | 18.2083 | 0.1314 | 1.2815 |
| 4/20/2019 12:16 | 20.2417 | 22.3667 | 22.085  | 22.1833 | 3.4851 | 18.3    | 0.1391 | 1.3143 |
| 4/20/2019 12:17 | 20.1917 | 21.2833 | 21.035  | 21.3333 | 3.4733 | 18.3    | 0.1421 | 1.335  |
| 4/20/2019 12:18 | 20.5333 | 23.6667 | 23.975  | 23.9333 | 3.4845 | 18.21   | 0.132  | 1.4538 |
| 4/20/2019 12:19 | 21.1    | 23.6    | 23.6583 | 24.1333 | 3.5116 | 18.125  | 0.1478 | 1.3703 |

|                 |         |         |          |         |         |          |        |        |
|-----------------|---------|---------|----------|---------|---------|----------|--------|--------|
| 4/20/2019 12:20 | 21.5667 | 23.4    | 23.1883  | 22.6167 | 3.528   | 17.92    | 0.1389 | 1.3535 |
| 4/20/2019 12:21 | 21.3417 | 21.2    | 22.8883  | 21.7833 | 3.5298  | 17.775   | 0.1358 | 1.3768 |
| 4/20/2019 12:22 | 20.7417 | 21.5667 | 22.205   | 21.35   | 3.5192  | 17.6909  | 0.1457 | 1.3679 |
| 4/20/2019 12:23 | 20.2    | 20.65   | 21.795   | 21.3333 | 3.5114  | 17.95    | 0.1333 | 1.3759 |
| 4/20/2019 12:24 | 19.675  | 20.5    | 21.4883  | 20.1833 | 3.5284  | 18.2091  | 0.1385 | 1.4022 |
| 4/20/2019 12:25 | 19.2    | 19.4    | 21.34    | 19.7167 | 3.5239  | 18.4667  | 0.1583 | 1.4099 |
| 4/20/2019 12:26 | 18.75   | 18.8333 | 20.39    | 19.0333 | 3.52    | 18.6545  | 0.1431 | 1.4168 |
| 4/20/2019 12:27 | 18.3    | 18.4667 | 20.2583  | 18.6667 | 3.52    | 18.8917  | 0.1594 | 1.4408 |
| 4/20/2019 12:28 | 17.85   | 18.2167 | 19.7633  | 18      | 3.5288  | 19.1909  | 0.1477 | 1.4643 |
| 4/20/2019 12:29 | 17.3333 | 17.2    | 18.8833  | 17.0833 | 3.5369  | 19.4091  | 0.1552 | 1.4661 |
| 4/20/2019 12:30 | 16.7667 | 16.1333 | 18.9767  | 16.9167 | 4.1623  | 19.7818  | 0.168  | 1.4889 |
| 4/20/2019 12:31 | 15.4583 | 13.4167 | 19.3617  | 14.45   | 10.3617 | 20.7583  | 0.1833 | 1.5921 |
| 4/20/2019 12:32 | 13.3417 | 10.85   | 26.845   | 17.1833 | 18.4366 | 22.825   | 0.2676 | 1.636  |
| 4/20/2019 12:33 | 9.9083  | 10.3    | 72.0842  | 37.1    | 41.9259 | 58.0546  | 0.5601 | 2.0204 |
| 4/20/2019 12:34 | 6.2167  | 6.7833  | 106.5167 | 47.8833 | 50.545  | 100.7667 | 0.8771 | 2.1803 |
| 4/20/2019 12:35 | 3.125   | 7.05    | 107.65   | 46.9167 | 52.4961 | 112.5091 | 0.9263 | 2.3038 |
| 4/20/2019 12:36 | 1.4167  | 15.9667 | 127.1667 | 55.8333 | 57.7426 | 119.9909 | 1.1184 | 2.2322 |
| 4/20/2019 12:37 | 0.9083  | 5.7     | 203.1083 | 98      | 69.8939 | 148.87   | 2.9492 | 2.4438 |
| 4/20/2019 12:38 | 0.725   | 6.8333  | 164.2667 | 66.1    | 60.8141 | 189.19   | 2.0094 | 2.4833 |
| 4/20/2019 12:39 | 0.6     | 7       | 149.9583 | 64.0333 | 55.1678 | 160.4917 | 1.5508 | 2.5055 |
| 4/20/2019 12:40 | 0.5333  | 7.8     | 163.8583 | 67.9167 | 59.9967 | 162.7    | 1.7538 | 2.5243 |
| 4/20/2019 12:41 | 0.5     | 8.3167  | 160.9917 | 67.7833 | 59.3742 | 162.7333 | 1.7843 | 2.5327 |
| 4/20/2019 12:42 | 0.5     | 7.5333  | 159.3417 | 66.35   | 58.8049 | 158.3364 | 1.8192 | 2.5299 |
| 4/20/2019 12:43 | 0.5     | 7.2     | 156.4833 | 65.9833 | 58.151  | 157.4182 | 1.9022 | 2.5313 |
| 4/20/2019 12:44 | 0.5083  | 7.25    | 153.5667 | 65.2667 | 57.3261 | 155.8727 | 1.886  | 2.5168 |
| 4/20/2019 12:45 | 0.5     | 7.15    | 150.5917 | 64.1667 | 56.3963 | 155.725  | 1.9203 | 2.5324 |
| 4/20/2019 12:46 | 0.5     | 6.9667  | 147.05   | 62.9667 | 55.6173 | 154.3833 | 1.9423 | 2.4956 |
| 4/20/2019 12:47 | 0.4833  | 7.65    | 143.375  | 61.9667 | 54.6303 | 152.0818 | 1.9327 | 2.4883 |
| 4/20/2019 12:48 | 0.5     | 7.3167  | 140.8917 | 61.1    | 53.8684 | 150.1333 | 1.9488 | 2.5038 |
| 4/20/2019 12:49 | 0.5     | 7.7833  | 138.0417 | 59.75   | 53.1251 | 149.4909 | 1.9743 | 2.4912 |
| 4/20/2019 12:50 | 0.5     | 6.75    | 135.1333 | 59.0333 | 52.193  | 148.8583 | 1.9689 | 2.4957 |
| 4/20/2019 12:51 | 0.5     | 7       | 132.175  | 57.4    | 51.3068 | 148.13   | 1.9928 | 2.4808 |
| 4/20/2019 12:52 | 0.5     | 6.8833  | 129.8583 | 56.9333 | 50.667  | 147.4364 | 1.9569 | 2.4921 |
| 4/20/2019 12:53 | 0.5     | 6.3833  | 127.6083 | 55.7333 | 49.9515 | 146.4111 | 1.9644 | 2.5014 |
| 4/20/2019 12:54 | 0.5     | 6.5167  | 125.1333 | 54.85   | 49.2645 | 145.5667 | 1.986  | 2.5022 |
| 4/20/2019 12:55 | 0.5     | 6.5     | 123.6417 | 55.0167 | 48.7068 | 144.3727 | 1.9831 | 2.4909 |
| 4/20/2019 12:56 | 0.5333  | 6.5167  | 121.6083 | 53.0333 | 48.0683 | 143.3273 | 1.9615 | 2.4877 |
| 4/20/2019 12:57 | 0.6     | 5.25    | 119.4167 | 53      | 47.3608 | 141.35   | 1.9785 | 2.4582 |
| 4/20/2019 12:58 | 0.6     | 6.3333  | 117.575  | 52.8333 | 46.7808 | 140.1583 | 1.9628 | 2.4978 |
| 4/20/2019 12:59 | 0.6     | 6.2167  | 115.8    | 52.2833 | 46.1558 | 138.82   | 1.9383 | 2.5187 |
| 4/20/2019 13:00 | 0.55    | 5.8     | 113.6583 | 50.9333 | 45.4798 | 137.6182 | 1.9498 | 2.5157 |
| 4/20/2019 13:01 | 0.5833  | 5.7167  | 111.9    | 50      | 44.685  | 136.075  | 1.9192 | 2.5068 |
| 4/20/2019 13:02 | 0.6     | 6       | 110.5917 | 49.8167 | 44.1977 | 135.3909 | 1.9184 | 2.4888 |
| 4/20/2019 13:03 | 0.6     | 5.6167  | 109.2833 | 48.8667 | 43.7033 | 134.6727 | 1.8801 | 2.483  |
| 4/20/2019 13:04 | 0.65    | 5.85    | 107.5917 | 47.9167 | 43.0853 | 133.9273 | 1.8991 | 2.4562 |
| 4/20/2019 13:05 | 0.625   | 5.7833  | 106.0917 | 47.5667 | 42.4627 | 133      | 1.8739 | 2.4696 |
| 4/20/2019 13:06 | 0.6     | 5.6833  | 104.275  | 46.65   | 41.9632 | 132.15   | 1.8373 | 2.4481 |

|                 |        |        |          |         |         |          |        |        |
|-----------------|--------|--------|----------|---------|---------|----------|--------|--------|
| 4/20/2019 13:07 | 0.6    | 4.8833 | 102.9    | 45.7833 | 41.421  | 131.0909 | 1.8688 | 2.4416 |
| 4/20/2019 13:08 | 0.6    | 5.8333 | 101.4833 | 46      | 40.9094 | 130.0583 | 1.8267 | 2.4559 |
| 4/20/2019 13:09 | 0.6333 | 5.3167 | 99.9542  | 45.8333 | 40.2538 | 129.7636 | 1.8412 | 2.4368 |
| 4/20/2019 13:10 | 0.7    | 5.3167 | 98.1658  | 45.05   | 39.5944 | 129.1    | 1.7996 | 2.467  |
| 4/20/2019 13:11 | 0.7    | 4.9    | 97.5075  | 43.9833 | 39.2406 | 128.0909 | 1.8065 | 2.4539 |
| 4/20/2019 13:12 | 0.725  | 5.4167 | 96.0592  | 43.3833 | 38.7543 | 127.01   | 1.8196 | 2.4448 |
| 4/20/2019 13:13 | 0.7    | 5.4833 | 94.5742  | 42.8667 | 38.2311 | 125.925  | 1.8364 | 2.4508 |
| 4/20/2019 13:14 | 0.65   | 5.3167 | 93.5583  | 42.3333 | 37.8993 | 124.875  | 1.8345 | 2.4583 |
| 4/20/2019 13:15 | 0.6    | 4.6667 | 92.5583  | 42.1833 | 37.3383 | 123.8364 | 1.8091 | 2.4677 |
| 4/20/2019 13:16 | 0.5417 | 4.4833 | 91.3408  | 41.1167 | 36.8248 | 122.6333 | 1.7813 | 2.4503 |
| 4/20/2019 13:17 | 0.6    | 5.3333 | 89.7542  | 40.4167 | 36.2199 | 121.425  | 1.7631 | 2.4103 |
| 4/20/2019 13:18 | 0.6    | 5.1667 | 89.095   | 40.05   | 35.8625 | 120.2182 | 1.7692 | 2.4535 |
| 4/20/2019 13:19 | 0.6    | 4.7167 | 87.5383  | 38.9833 | 35.4305 | 119.2727 | 1.7594 | 2.4564 |
| 4/20/2019 13:20 | 0.5917 | 4.9833 | 86.7717  | 39.0333 | 35.0094 | 118.2667 | 1.763  | 2.4294 |
| 4/20/2019 13:21 | 0.5333 | 4.6833 | 85.7242  | 39.0167 | 34.6037 | 117.0727 | 1.7443 | 2.4023 |
| 4/20/2019 13:22 | 0.5    | 4.4833 | 84.6383  | 38.3167 | 34.1422 | 115.9083 | 1.7288 | 2.3825 |
| 4/20/2019 13:23 | 0.5    | 4.7167 | 83.4333  | 38.3333 | 33.6228 | 114.9364 | 1.69   | 2.3996 |
| 4/20/2019 13:24 | 0.5    | 4.3    | 82.6517  | 37.4667 | 33.2838 | 113.9417 | 1.6867 | 2.3905 |
| 4/20/2019 13:25 | 0.5    | 4.1667 | 81.6517  | 36.8333 | 32.8906 | 112.9833 | 1.6729 | 2.392  |
| 4/20/2019 13:26 | 0.5    | 3.9333 | 80.9775  | 36.4    | 32.482  | 112.1909 | 1.6875 | 2.3783 |
| 4/20/2019 13:27 | 0.5    | 3.6333 | 79.83    | 35.85   | 32.302  | 111.4    | 1.6709 | 2.3967 |
| 4/20/2019 13:28 | 0.5    | 4.2667 | 78.98    | 35.5833 | 32.302  | 110.675  | 1.698  | 2.4012 |
| 4/20/2019 13:29 | 0.5    | 3.95   | 78.225   | 34.9833 | 31.7685 | 109.97   | 1.6919 | 2.3989 |
| 4/20/2019 13:30 | 0.5    | 3.9167 | 77.5117  | 35      | 30.8812 | 109.2091 | 1.6633 | 2.3928 |
| 4/20/2019 13:31 | 0.5167 | 4.0167 | 76.3225  | 34.6667 | 30.5824 | 108.52   | 1.6563 | 2.3727 |
| 4/20/2019 13:32 | 0.5    | 4.5167 | 75.3975  | 34.0167 | 30.2125 | 107.9364 | 1.6518 | 2.3814 |
| 4/20/2019 13:33 | 0.575  | 4.0333 | 74.6317  | 33.75   | 29.8896 | 107.33   | 1.6576 | 2.3765 |
| 4/20/2019 13:34 | 0.6    | 4.35   | 73.9142  | 33.5667 | 29.5146 | 106.7333 | 1.6524 | 2.371  |
| 4/20/2019 13:35 | 0.6    | 3.6667 | 73.2658  | 33.1    | 29.149  | 106.03   | 1.6348 | 2.396  |
| 4/20/2019 13:36 | 0.6    | 3.9833 | 72.1275  | 32.4167 | 28.8404 | 105.4091 | 1.6298 | 2.4175 |
| 4/20/2019 13:37 | 0.6    | 3.6833 | 71.7067  | 32.2667 | 28.5528 | 104.7545 | 1.6327 | 2.4089 |
| 4/20/2019 13:38 | 0.6    | 3.7167 | 71.4175  | 32.1833 | 28.3216 | 104.1667 | 1.616  | 2.4232 |
| 4/20/2019 13:39 | 0.6167 | 4.4    | 70.2983  | 31.6833 | 27.9749 | 103.5455 | 1.599  | 2.4023 |
| 4/20/2019 13:40 | 0.7    | 3.4833 | 69.5942  | 30.95   | 27.59   | 102.8    | 1.6364 | 2.4085 |
| 4/20/2019 13:41 | 0.6    | 3.6667 | 69.0492  | 30.8667 | 27.2868 | 102.2091 | 1.5843 | 2.4101 |
| 4/20/2019 13:42 | 0.6    | 3.7    | 68.1467  | 30.3833 | 26.9737 | 101.8417 | 1.59   | 2.4015 |
| 4/20/2019 13:43 | 0.6    | 3.45   | 67.5933  | 29.95   | 26.5784 | 101.2917 | 1.616  | 2.3914 |
| 4/20/2019 13:44 | 0.6    | 3.5833 | 66.7558  | 30.1333 | 26.3341 | 100.7091 | 1.5764 | 2.3935 |
| 4/20/2019 13:45 | 0.575  | 3.4167 | 65.9942  | 29.95   | 26.0604 | 100.15   | 1.5877 | 2.3881 |
| 4/20/2019 13:46 | 0.5    | 3.2167 | 65.4942  | 29.1    | 25.7121 | 99.4273  | 1.5762 | 2.4218 |
| 4/20/2019 13:47 | 0.5    | 2.65   | 64.5758  | 28.7667 | 25.3226 | 98.675   | 1.4838 | 2.4417 |
| 4/20/2019 13:48 | 0.5    | 3.4667 | 64.3525  | 29.4333 | 25.1302 | 98.0273  | 1.4761 | 2.4187 |
| 4/20/2019 13:49 | 0.5    | 3.15   | 63.585   | 29.0833 | 24.8924 | 97.3333  | 1.5117 | 2.3778 |
| 4/20/2019 13:50 | 0.45   | 3.1167 | 63.3083  | 28.4333 | 24.6703 | 96.7     | 1.5361 | 2.412  |
| 4/20/2019 13:51 | 0.4333 | 2.9    | 62.6192  | 27.9833 | 24.3814 | 96.05    | 1.4571 | 2.4039 |
| 4/20/2019 13:52 | 0.5    | 3.9    | 62.175   | 28.4833 | 24.0902 | 95.4833  | 1.4496 | 2.3978 |
| 4/20/2019 13:53 | 0.525  | 2.8667 | 59.1133  | 26.4    | 23.2148 | 94.925   | 1.4053 | 2.382  |

|                 |         |         |         |         |         |         |        |        |
|-----------------|---------|---------|---------|---------|---------|---------|--------|--------|
| 4/20/2019 13:54 | 0.6     | 3.9     | 55.9183 | 26.3333 | 22.0106 | 94      | 1.3041 | 2.3848 |
| 4/20/2019 13:55 | 0.6     | 3.05    | 54.6317 | 24.9833 | 22.2915 | 93.0417 | 1.3359 | 2.4145 |
| 4/20/2019 13:56 | 0.6636  | 3.1667  | 46.4567 | 21.8    | 21.7838 | 91.8091 | 1.1928 | 2.1476 |
| 4/20/2019 13:57 | 1.025   | 4.9167  | 34.9942 | 19.65   | 20.0658 | 89.8    | 0.9656 | 1.9115 |
| 4/20/2019 13:58 | 1.3833  | 4.0667  | 36.8825 | 18.9833 | 21.7789 | 87.8727 | 0.9915 | 1.8385 |
| 4/20/2019 13:59 | 1.7917  | 4.15    | 32.2583 | 17.6167 | 21.1328 | 85.3333 | 0.875  | 1.9863 |
| 4/20/2019 14:00 | 1.9833  | 5.0333  | 29.3917 | 16.5833 | 20.5942 | 82.5364 | 0.8189 | 1.9029 |
| 4/20/2019 14:01 | 2.2833  | 5.8333  | 26.8658 | 15.9667 | 20.1084 | 79.5727 | 0.7695 | 1.8448 |
| 4/20/2019 14:02 | 2.6667  | 6.3     | 24.0258 | 15.3833 | 19.0524 | 76.1909 | 0.6836 | 1.7852 |
| 4/20/2019 14:03 | 3.075   | 6.3667  | 22.2008 | 15.6167 | 18.0295 | 72.525  | 0.6385 | 1.7533 |
| 4/20/2019 14:04 | 3.5167  | 7.2833  | 21.0617 | 14.6667 | 17.3992 | 68.8444 | 0.5911 | 1.7498 |
| 4/20/2019 14:05 | 3.95    | 7.5     | 19.8167 | 14.9333 | 16.3546 | 64.7    | 0.5433 | 1.7063 |
| 4/20/2019 14:06 | 4.45    | 8.35    | 18.5483 | 14.8    | 14.9808 | 60.7273 | 0.5008 | 1.6584 |
| 4/20/2019 14:07 | 4.9167  | 8.6333  | 18.3317 | 13.9333 | 14.7118 | 56.8333 | 0.484  | 1.6367 |
| 4/20/2019 14:08 | 5.425   | 10.8833 | 17.3417 | 14.85   | 13.2593 | 53.1222 | 0.4401 | 1.5994 |
| 4/20/2019 14:09 | 5.975   | 11.1167 | 16.8967 | 15.4333 | 11.9999 | 49.85   | 0.4131 | 1.5617 |
| 4/20/2019 14:10 | 7.0083  | 13.3333 | 15.4933 | 16.8333 | 9.5375  | 44.3    | 0.3172 | 1.5112 |
| 4/20/2019 14:11 | 8.0083  | 13.7833 | 15.365  | 16.8167 | 8.8038  | 28.3    | 0.316  | 1.5035 |
| 4/20/2019 14:12 | 8.9333  | 15.0167 | 15.3817 | 17      | 8.2515  | 26.5429 | 0.2822 | 1.4905 |
| 4/20/2019 14:13 | 9.3333  | 13.9833 | 15.3267 | 16.6833 | 7.9824  | 27.88   | 0.2852 | 1.5148 |
| 4/20/2019 14:14 | 9.6167  | 14.7667 | 15.955  | 16.95   | 7.7543  | 28.8455 | 0.2876 | 1.4883 |
| 4/20/2019 14:15 | 9.9833  | 14.95   | 15.925  | 17.25   | 7.1652  | 28.6182 | 0.2583 | 1.467  |
| 4/20/2019 14:16 | 10.3583 | 15.2    | 15.92   | 17      | 6.8745  | 28.3455 | 0.2452 | 1.4624 |
| 4/20/2019 14:17 | 10.7667 | 15.7667 | 15.8717 | 17.3833 | 6.5698  | 28.0167 | 0.2569 | 1.4449 |
| 4/20/2019 14:18 | 10.8833 | 14.9833 | 16.1933 | 17.3667 | 6.4     | 27.62   | 0.2252 | 1.4381 |
| 4/20/2019 14:19 | 11.2167 | 15.9667 | 16.2017 | 18.0333 | 5.9058  | 27.12   | 0.2306 | 1.4284 |
| 4/20/2019 14:20 | 11.5167 | 16.2667 | 16.3417 | 17.1667 | 5.7548  | 26.6    | 0.2227 | 1.3716 |
| 4/20/2019 14:21 | 11.9333 | 16.5667 | 16.7667 | 18.2333 | 5.4998  | 26.025  | 0.2029 | 1.394  |
| 4/20/2019 14:22 | 12.2167 | 16.25   | 16.5917 | 17.7667 | 5.1696  | 25.3333 | 0.2126 | 1.3823 |
| 4/20/2019 14:23 | 12.475  | 16.6833 | 16.6633 | 17.9833 | 5.1127  | 24.72   | 0.1925 | 1.3864 |
| 4/20/2019 14:24 | 12.775  | 17.7    | 17.5383 | 18.9167 | 4.7676  | 24.0333 | 0.1819 | 1.4    |
| 4/20/2019 14:25 | 13.175  | 17.8167 | 17.5033 | 18.5167 | 4.5593  | 23.33   | 0.1844 | 1.3687 |
| 4/20/2019 14:26 | 13.5455 | 18.7167 | 17.42   | 18.45   | 4.4784  | 22.5667 | 0.1742 | 1.3623 |
| 4/20/2019 14:27 | 13.8417 | 18.2667 | 17.6667 | 19.0333 | 4.4558  | 22      | 0.1754 | 1.3649 |
| 4/20/2019 14:28 | 14.0917 | 18.25   | 17.8267 | 19.1    | 4.3706  | 21.4    | 0.1674 | 1.3576 |
| 4/20/2019 14:29 | 14.3583 | 19.0333 | 18.115  | 19.1167 | 4.371   | 20.9636 | 0.1575 | 1.3248 |
| 4/20/2019 14:30 | 14.6417 | 18.55   | 18.24   | 19.1167 | 4.2266  | 20.5091 | 0.1705 | 1.3222 |
| 4/20/2019 14:31 | 14.75   | 18.9167 | 18.1433 | 19.2667 | 3.8399  | 20.125  | 0.1582 | 1.317  |
| 4/20/2019 14:32 | 14.7417 | 18.5333 | 17.5667 | 18.9333 | 3.7739  | 19.7455 | 0.1554 | 1.3112 |
| 4/20/2019 14:33 | 14.85   | 19.3    | 18.2783 | 20.2    | 3.6888  | 19.3917 | 0.1603 | 1.3374 |
| 4/20/2019 14:34 | 15.0167 | 18.2667 | 18.5633 | 19.6333 | 3.6083  | 19.2636 | 0.1544 | 1.3383 |
| 4/20/2019 14:35 | 15.0833 | 17.8333 | 18.425  | 18.6    | 3.627   | 19.075  | 0.1618 | 1.3185 |
| 4/20/2019 14:36 | 15.05   | 19.0667 | 18.0417 | 19.4167 | 3.5469  | 18.85   | 0.1486 | 1.3173 |
| 4/20/2019 14:37 | 15.0583 | 18.4333 | 18.6383 | 19.25   | 3.4259  | 18.7    | 0.1298 | 1.3151 |
| 4/20/2019 14:38 | 15.1333 | 18.1667 | 17.6333 | 18.9667 | 3.4287  | 18.6182 | 0.148  | 1.2919 |
| 4/20/2019 14:39 | 15.2583 | 19.0167 | 18.81   | 19.7    | 3.3793  | 18.6    | 0.148  | 1.3073 |
| 4/20/2019 14:40 | 15.4083 | 19.8333 | 18.2333 | 19.35   | 3.3948  | 18.65   | 0.144  | 1.2894 |

|                 |         |         |         |         |        |         |        |        |
|-----------------|---------|---------|---------|---------|--------|---------|--------|--------|
| 4/20/2019 14:41 | 15.95   | 20.3333 | 19.34   | 20.1667 | 3.376  | 18.625  | 0.1416 | 1.3065 |
| 4/20/2019 14:42 | 16.3167 | 19.6667 | 19.1583 | 20.3167 | 3.3426 | 18.3273 | 0.1425 | 1.3054 |
| 4/20/2019 14:43 | 16.7    | 20.7667 | 19.665  | 20.5833 | 3.2925 | 18.3    | 0.1222 | 1.301  |
| 4/20/2019 14:44 | 16.7583 | 19.3833 | 18.71   | 19.8    | 3.3297 | 18.3    | 0.134  | 1.3109 |
| 4/20/2019 14:45 | 16.5917 | 19.0833 | 18.635  | 19.3667 | 3.352  | 18.3    | 0.133  | 1.2951 |
| 4/20/2019 14:46 | 16.2583 | 19.35   | 18.1183 | 18.4333 | 3.3308 | 18.2546 | 0.1338 | 1.3051 |
| 4/20/2019 14:47 | 15.8083 | 17.6    | 17.88   | 17.8333 | 3.3938 | 18.2    | 0.1455 | 1.291  |
| 4/20/2019 14:48 | 15.4417 | 17.45   | 17.8017 | 17.8833 | 3.4693 | 18.2546 | 0.125  | 1.299  |
| 4/20/2019 14:49 | 15.4083 | 18.1667 | 18.0517 | 18.9833 | 3.4342 | 18.2417 | 0.1345 | 1.3368 |
| 4/20/2019 14:50 | 15.625  | 18.55   | 18.4367 | 19.1333 | 3.3793 | 18.2727 | 0.1281 | 1.3401 |
| 4/20/2019 14:51 | 16.0417 | 18.6667 | 18.5433 | 19.6    | 3.356  | 18.1909 | 0.1255 | 1.3381 |
| 4/20/2019 14:52 | 16.5    | 20.0167 | 19.5933 | 20.2667 | 3.4214 | 18.1    | 0.1241 | 1.3218 |
| 4/20/2019 14:53 | 16.7583 | 19.5167 | 19.28   | 19.5    | 3.3486 | 18.0333 | 0.124  | 1.2913 |
| 4/20/2019 14:54 | 17.15   | 19.8833 | 19.7433 | 20.0667 | 3.2451 | 18.26   | 0.1179 | 1.2991 |
| 4/20/2019 14:55 | 17.4    | 20.5    | 20.3717 | 20.9667 | 3.2293 | 18.2667 | 0.1281 | 1.301  |
| 4/20/2019 14:56 | 17.7636 | 20.65   | 20.2167 | 21.35   | 3.279  | 18.2    | 0.1129 | 1.2892 |
| 4/20/2019 14:57 | 18.0667 | 21.3333 | 20.37   | 21.4    | 3.2032 | 18.1455 | 0.1236 | 1.309  |
| 4/20/2019 14:58 | 18.225  | 22.0167 | 20.43   | 21      | 3.0649 | 18.1    | 0.1148 | 1.3215 |
| 4/20/2019 14:59 | 18.3167 | 20.6667 | 20.4017 | 21.3333 | 3.2527 | 18.1    | 0.257  | 1.315  |
| 4/20/2019 15:00 | 18.025  | 19.95   | 19.68   | 19.9667 | 4.575  | 18.1364 | 0.5126 | 1.2763 |
| 4/20/2019 15:01 | 17.875  | 20.0667 | 20.2833 | 20.9333 | 4.5822 | 18.2    | 0.2943 | 1.2916 |
| 4/20/2019 15:02 | 17.9333 | 20.4167 | 20.6617 | 21.6    | 4.186  | 18.2    | 0.2114 | 1.2898 |
| 4/20/2019 15:03 | 18.425  | 21.7167 | 20.7233 | 21.65   | 3.8726 | 18.1364 | 0.1983 | 1.3154 |
| 4/20/2019 15:04 | 18.5917 | 20.8667 | 20.5133 | 20.6667 | 3.8921 | 18.1    | 0.1725 | 1.2778 |
| 4/20/2019 15:05 | 18.6333 | 21.55   | 20.6317 | 21.05   | 3.8248 | 18.1    | 0.1765 | 1.2652 |
| 4/20/2019 15:06 | 18.6167 | 21.35   | 20.98   | 21.8167 | 3.6455 | 18.0167 | 0.1541 | 1.3049 |
| 4/20/2019 15:07 | 19.05   | 21.9667 | 21.8517 | 22.45   | 3.4975 | 18      | 0.1426 | 1.3039 |
| 4/20/2019 15:08 | 19.1917 | 21.65   | 21.42   | 22.3333 | 3.5222 | 18      | 0.1609 | 1.297  |
| 4/20/2019 15:09 | 19.5833 | 22.7667 | 22.2783 | 23.2    | 3.3064 | 17.9364 | 0.1469 | 1.3104 |
| 4/20/2019 15:10 | 19.7833 | 22.7    | 22.5133 | 22.8167 | 3.2362 | 17.9    | 0.1456 | 1.2759 |
| 4/20/2019 15:11 | 20.1917 | 22.6167 | 22.1883 | 23.25   | 3.201  | 17.8727 | 0.1531 | 1.259  |
| 4/20/2019 15:12 | 20.1667 | 22.3833 | 22.0117 | 21.5167 | 3.1949 | 17.625  | 0.1461 | 1.2718 |
| 4/20/2019 15:13 | 20.075  | 21.75   | 22.1467 | 22.45   | 3.0998 | 17.3546 | 0.141  | 1.2898 |
| 4/20/2019 15:14 | 19.9167 | 22.8333 | 21.745  | 22.6167 | 3.0603 | 17.1818 | 0.1487 | 1.3038 |
| 4/20/2019 15:15 | 20.0083 | 22.2167 | 21.775  | 22.3833 | 3.0428 | 17.0909 | 0.1349 | 1.2868 |
| 4/20/2019 15:16 | 20.125  | 23.05   | 22.2433 | 22.9167 | 3.2413 | 16.975  | 0.14   | 1.2888 |
| 4/20/2019 15:17 | 20.45   | 22.8167 | 22.365  | 22.5167 | 3.4908 | 16.9    | 0.1429 | 1.2818 |
| 4/20/2019 15:18 | 20.2917 | 21.4167 | 21.4683 | 21.4667 | 3.5172 | 16.9    | 0.1229 | 1.2777 |
| 4/20/2019 15:19 | 20.2667 | 22.9833 | 22.4567 | 22.6    | 3.5189 | 16.9    | 0.1412 | 1.2924 |
| 4/20/2019 15:20 | 20.2083 | 23.15   | 22.2717 | 23.2    | 3.4696 | 16.85   | 0.1283 | 1.2913 |
| 4/20/2019 15:21 | 20.6417 | 22.6833 | 22.4817 | 23.6667 | 3.329  | 16.8    | 0.1284 | 1.2974 |
| 4/20/2019 15:22 | 20.8083 | 23.3    | 22.735  | 24.2833 | 3.1799 | 16.7583 | 0.1381 | 1.2619 |
| 4/20/2019 15:23 | 21.0667 | 22.8667 | 23.5833 | 23.4833 | 3.0869 | 16.7    | 0.1229 | 1.2854 |
| 4/20/2019 15:24 | 21.2667 | 23.1667 | 22.74   | 23.8833 | 3.1327 | 16.7083 | 0.1257 | 1.294  |
| 4/20/2019 15:25 | 21.3333 | 22.9833 | 22.7567 | 23.4167 | 3.118  | 16.8    | 0.1273 | 1.2773 |
| 4/20/2019 15:26 | 20.8    | 20.9833 | 21.5133 | 21.6167 | 3.21   | 16.7083 | 0.1073 | 1.2463 |
| 4/20/2019 15:27 | 20.0833 | 21.2833 | 21.0967 | 20.3667 | 3.2306 | 16.7    | 0.1305 | 1.25   |

|                 |         |         |         |         |        |         |        |        |
|-----------------|---------|---------|---------|---------|--------|---------|--------|--------|
| 4/20/2019 15:28 | 19.3    | 20.0333 | 20.63   | 20.05   | 3.2226 | 16.7    | 0.1349 | 1.277  |
| 4/20/2019 15:29 | 18.7167 | 19.45   | 19.9167 | 19.3333 | 3.2022 | 16.7455 | 0.1225 | 1.3138 |
| 4/20/2019 15:30 | 18.0583 | 18.1833 | 19.165  | 18.6667 | 3.203  | 16.7    | 0.1429 | 1.3188 |
| 4/20/2019 15:31 | 17.4833 | 19.1833 | 19.14   | 19.0833 | 3.2038 | 16.7091 | 0.1256 | 1.306  |
| 4/20/2019 15:32 | 16.9083 | 17.2167 | 18.505  | 18.2    | 3.2046 | 16.8    | 0.1253 | 1.3152 |
| 4/20/2019 15:33 | 16.5083 | 17.9333 | 18.5192 | 17.6833 | 3.2039 | 16.9182 | 0.1349 | 1.2948 |
| 4/20/2019 15:34 | 16.075  | 16.9833 | 18.0742 | 16.6833 | 3.2049 | 17.125  | 0.1121 | 1.3019 |
| 4/20/2019 15:35 | 15.7083 | 16.4333 | 17.5275 | 16.9333 | 3.2024 | 17.3636 | 0.1327 | 1.3196 |
| 4/20/2019 15:36 | 15.3167 | 15.4667 | 17.255  | 16.2167 | 3.1997 | 17.625  | 0.1346 | 1.3323 |
| 4/20/2019 15:37 | 14.9667 | 15.2167 | 16.8267 | 15.9167 | 3.1901 | 17.81   | 0.1279 | 1.3339 |
| 4/20/2019 15:38 | 14.6417 | 15.3833 | 16.7242 | 15.3667 | 3.1738 | 17.8917 | 0.1318 | 1.3263 |
| 4/20/2019 15:39 | 14.2667 | 14.4167 | 16.2992 | 14.2667 | 3.197  | 18.2364 | 0.1312 | 1.3393 |
| 4/20/2019 15:40 | 13.875  | 14.3    | 15.9583 | 14.5333 | 3.1854 | 18.6083 | 0.1254 | 1.3471 |
| 4/20/2019 15:41 | 13.5667 | 13.5833 | 15.8992 | 14.4333 | 3.1851 | 18.925  | 0.1395 | 1.3446 |
| 4/20/2019 15:42 | 13.2833 | 13.9667 | 15.1583 | 14.5667 | 3.203  | 19.2667 | 0.1266 | 1.3563 |
| 4/20/2019 15:43 | 13.0333 | 13.0833 | 15.255  | 13.4    | 3.1892 | 19.6    | 0.1337 | 1.3413 |
| 4/20/2019 15:44 | 12.8083 | 13.1833 | 15.1158 | 13.1    | 3.1732 | 19.85   | 0.1444 | 1.3514 |
| 4/20/2019 15:45 | 12.5917 | 12.7667 | 14.7925 | 12.3167 | 3.1872 | 20.1909 | 0.1265 | 1.3536 |
| 4/20/2019 15:46 | 12.3167 | 12.5167 | 14.685  | 12.0833 | 3.2005 | 20.4583 | 0.1397 | 1.3652 |
| 4/20/2019 15:47 | 11.9083 | 11.7667 | 14.0733 | 11.7167 | 3.1996 | 20.7455 | 0.1342 | 1.3823 |
| 4/20/2019 15:48 | 11.6417 | 11.8667 | 14.0442 | 11.7333 | 3.1989 | 21.0083 | 0.139  | 1.3798 |
| 4/20/2019 15:49 | 11.3917 | 11.2667 | 13.505  | 11.6333 | 3.1814 | 21.2833 | 0.1473 | 1.4016 |
| 4/20/2019 15:50 | 11.1333 | 10.5333 | 13.6367 | 10.7333 | 3.1903 | 21.7727 | 0.1291 | 1.4129 |
| 4/20/2019 15:51 | 10.8667 | 10.9    | 12.9333 | 10.5    | 3.2048 | 21.9917 | 0.1361 | 1.4129 |
| 4/20/2019 15:52 | 10.5083 | 10.2833 | 12.8292 | 10.6833 | 3.2085 | 22.1636 | 0.1381 | 1.4062 |
| 4/20/2019 15:53 | 10.2583 | 10.25   | 12.5733 | 9.9333  | 3.2032 | 22.2833 | 0.1296 | 1.4138 |
| 4/20/2019 15:54 | 10.0167 | 9.2333  | 12.3175 | 9.6167  | 3.2037 | 22.2833 | 0.1454 | 1.4082 |
| 4/20/2019 15:55 | 9.85    | 10      | 11.9033 | 9.6333  | 3.2193 | 22.375  | 0.1368 | 1.4167 |
| 4/20/2019 15:56 | 9.625   | 9.7167  | 11.9792 | 9.35    | 3.2262 | 22.55   | 0.1437 | 1.4225 |
| 4/20/2019 15:57 | 9.3167  | 9.1167  | 11.7208 | 8.25    | 3.2356 | 22.7182 | 0.1386 | 1.4173 |
| 4/20/2019 15:58 | 9.0667  | 8.0833  | 11.5592 | 8.6667  | 3.2443 | 22.8583 | 0.1327 | 1.4255 |
| 4/20/2019 15:59 | 8.8     | 8.5     | 11.4208 | 8.2667  | 3.2393 | 22.7083 | 0.1439 | 1.3773 |
| 4/20/2019 16:00 | 8.6167  | 7.7333  | 11.0775 | 8.0833  | 3.2467 | 22.7727 | 0.1346 | 1.3895 |
| 4/20/2019 16:01 | 8.45    | 8.7167  | 10.66   | 7.8833  | 3.2315 | 22.8833 | 0.1296 | 1.4369 |
| 4/20/2019 16:02 | 8.2917  | 8.5667  | 10.5575 | 7.2333  | 3.2468 | 22.9917 | 0.1469 | 1.4409 |
| 4/20/2019 16:03 | 8.1333  | 6.9667  | 10.6292 | 7.5333  | 3.2474 | 23.1    | 0.1328 | 1.4602 |
| 4/20/2019 16:04 | 7.9333  | 7.35    | 10.5342 | 7.5     | 3.2417 | 23.2333 | 0.1447 | 1.4692 |
| 4/20/2019 16:05 | 7.7     | 6.7333  | 10.2308 | 6.75    | 3.2649 | 23.3727 | 0.1434 | 1.4677 |
| 4/20/2019 16:06 | 7.4833  | 6.5833  | 9.9121  | 6.7833  | 3.2703 | 23.625  | 0.1301 | 1.4697 |
| 4/20/2019 16:07 | 7.2417  | 6.6333  | 9.9269  | 6.6333  | 3.2454 | 23.9273 | 0.1447 | 1.4477 |
| 4/20/2019 16:08 | 7.0833  | 6.6     | 9.9231  | 6.6167  | 3.2557 | 24.0167 | 0.1384 | 1.432  |
| 4/20/2019 16:09 | 6.925   | 6.3167  | 9.6682  | 5.9167  | 3.2653 | 24.14   | 0.1335 | 1.4357 |
| 4/20/2019 16:10 | 6.7917  | 5.6833  | 9.6031  | 6.1833  | 3.2636 | 24.225  | 0.1502 | 1.4407 |
| 4/20/2019 16:11 | 6.65    | 5.75    | 9.3595  | 6.4667  | 3.2718 | 24.5273 | 0.1306 | 1.4426 |
| 4/20/2019 16:12 | 6.475   | 5.0667  | 9.1678  | 5.7333  | 3.27   | 24.7    | 0.1398 | 1.4669 |
| 4/20/2019 16:13 | 6.2667  | 5.95    | 8.9988  | 4.9333  | 3.2653 | 24.8182 | 0.1416 | 1.4847 |
| 4/20/2019 16:14 | 6.0167  | 5.1667  | 8.6877  | 4.6333  | 3.2575 | 24.9083 | 0.1318 | 1.4556 |



|                 |        |        |        |        |        |         |        |        |
|-----------------|--------|--------|--------|--------|--------|---------|--------|--------|
| 4/20/2019 16:15 | 5.775  | 5.4167 | 8.6299 | 5.6833 | 3.2511 | 25.0167 | 0.1415 | 1.4656 |
| 4/20/2019 16:16 | 5.6083 | 5.3667 | 8.4909 | 5.5333 | 3.2638 | 25.1667 | 0.1351 | 1.4756 |
| 4/20/2019 16:17 | 5.4917 | 5.2167 | 8.4538 | 5.3833 | 3.2617 | 25.25   | 0.1332 | 1.4758 |
| 4/20/2019 16:18 | 5.3833 | 4.9833 | 8.5164 | 4.95   | 3.2448 | 25.3    | 0.1358 | 1.5018 |
| 4/20/2019 16:19 | 5.2667 | 5.1    | 8.4551 | 4.7333 | 3.2602 | 25.3    | 0.1317 | 1.5058 |
| 4/20/2019 16:20 | 5.1917 | 5.1    | 8.3691 | 4.5    | 3.2573 | 25.3833 | 0.1428 | 1.4938 |
| 4/20/2019 16:21 | 5.0833 | 4.5333 | 8.117  | 5.2333 | 3.2508 | 25.4083 | 0.135  | 1.4896 |
| 4/20/2019 16:22 | 4.95   | 3.7833 | 8.077  | 4.1167 | 3.2385 | 25.47   | 0.1366 | 1.4862 |
| 4/20/2019 16:23 | 4.8333 | 4.2333 | 7.8858 | 3.9333 | 3.2397 | 25.5    | 0.1395 | 1.4821 |
| 4/20/2019 16:24 | 4.7417 | 3.5333 | 7.8167 | 4.05   | 3.2313 | 25.52   | 0.1247 | 1.4744 |
| 4/20/2019 16:25 | 4.5917 | 3.9    | 7.7308 | 3.9333 | 3.241  | 25.6    | 0.1368 | 1.4713 |
| 4/20/2019 16:26 | 4.3917 | 3.9167 | 7.397  | 3.7167 | 3.232  | 25.6    | 0.1377 | 1.4393 |
| 4/20/2019 16:27 | 4.2583 | 3.3    | 7.6528 | 3.8    | 3.2366 | 25.6    | 0.1349 | 1.4458 |
| 4/20/2019 16:28 | 4.1364 | 3.9833 | 7.6885 | 4.0667 | 3.2113 | 25.6    | 0.1496 | 1.4536 |
| 4/20/2019 16:29 | 4.025  | 3.7833 | 7.4571 | 3.85   | 3.2356 | 25.6818 | 0.131  | 1.4574 |
| 4/20/2019 16:30 | 3.925  | 2.9167 | 7.3004 | 3.5667 | 3.2391 | 25.7    | 0.1452 | 1.4752 |
| 4/20/2019 16:31 | 3.8167 | 3.4    | 7.2932 | 3.3167 | 3.238  | 25.8    | 0.1344 | 1.4988 |
| 4/20/2019 16:32 | 3.7833 | 3.75   | 7.3105 | 2.8667 | 3.2247 | 25.85   | 0.1275 | 1.4767 |
| 4/20/2019 16:33 | 3.7    | 3.8667 | 7.1539 | 2.9167 | 3.1749 | 26      | 0.1402 | 1.4689 |
| 4/20/2019 16:34 | 3.6417 | 3.2333 | 7.3076 | 2.8    | 3.1661 | 26.1417 | 0.1277 | 1.5045 |
| 4/20/2019 16:35 | 3.5083 | 2.0333 | 7.0208 | 2.7167 | 3.1599 | 26.2917 | 0.1354 | 1.4774 |
| 4/20/2019 16:36 | 3.3667 | 3.5    | 6.9023 | 3.5167 | 3.1545 | 26.4091 | 0.1363 | 1.4773 |
| 4/20/2019 16:37 | 3.25   | 3.7333 | 6.746  | 2.35   | 3.1405 | 26.53   | 0.1274 | 1.4794 |
| 4/20/2019 16:38 | 3.1167 | 2.9167 | 7.0618 | 2.4667 | 3.1314 | 26.5727 | 0.148  | 1.4927 |
| 4/20/2019 16:39 | 2.9667 | 2.7333 | 6.6779 | 2.35   | 3.1439 | 26.6455 | 0.1278 | 1.488  |
| 4/20/2019 16:40 | 2.8333 | 2.95   | 6.5822 | 2.7    | 3.1415 | 26.7636 | 0.1394 | 1.496  |
| 4/20/2019 16:41 | 2.8    | 3.1167 | 6.5164 | 2.15   | 3.1516 | 26.8    | 0.1409 | 1.5209 |
| 4/20/2019 16:42 | 2.8    | 2.35   | 6.3037 | 2.3    | 3.1223 | 26.8    | 0.1356 | 1.5108 |
| 4/20/2019 16:43 | 2.7167 | 2.3833 | 6.323  | 2.3833 | 3.1305 | 26.9    | 0.1394 | 1.5132 |
| 4/20/2019 16:44 | 2.6417 | 2.35   | 6.3546 | 2      | 3.1456 | 26.9636 | 0.1373 | 1.4812 |
| 4/20/2019 16:45 | 2.6333 | 1.3    | 6.3682 | 2.5    | 3.1305 | 26.9818 | 0.143  | 1.4874 |
| 4/20/2019 16:46 | 2.65   | 1.3    | 6.3437 | 1.9    | 3.1293 | 26.9273 | 0.1327 | 1.5066 |
| 4/20/2019 16:47 | 2.5917 | 1.85   | 6.186  | 2.3333 | 3.1319 | 26.9    | 0.1294 | 1.5063 |
| 4/20/2019 16:48 | 2.5    | 1.7667 | 6.5372 | 2.2167 | 3.121  | 26.9    | 0.1401 | 1.5155 |
| 4/20/2019 16:49 | 2.45   | 2.4    | 6.2509 | 2.2    | 3.126  | 26.97   | 0.1292 | 1.5133 |
| 4/20/2019 16:50 | 2.4    | 2.3    | 6.0548 | 1.8167 | 3.112  | 26.9417 | 0.133  | 1.5051 |
| 4/20/2019 16:51 | 2.35   | 1.7167 | 6.0767 | 2.1    | 3.1239 | 26.9455 | 0.1365 | 1.5227 |
| 4/20/2019 16:52 | 2.3    | 1.1167 | 6.0134 | 1.8667 | 3.1079 | 26.9546 | 0.1267 | 1.5323 |
| 4/20/2019 16:53 | 2.275  | 1.5333 | 6.1563 | 1.8167 | 3.1183 | 26.92   | 0.1459 | 1.5562 |
| 4/20/2019 16:54 | 2.2    | 1.9667 | 5.8544 | 1.1667 | 3.1243 | 26.9909 | 0.1267 | 1.5795 |
| 4/20/2019 16:55 | 2.2    | 1.25   | 6.2536 | 1.4167 | 3.1221 | 27.0417 | 0.132  | 1.5548 |
| 4/20/2019 16:56 | 2.2    | 1.5167 | 6.1733 | 1.3    | 3.1135 | 27.1    | 0.1449 | 1.5428 |
| 4/20/2019 16:57 | 2.225  | 1.1333 | 5.9365 | 1.2167 | 3.1015 | 27.1    | 0.1251 | 1.5441 |
| 4/20/2019 16:58 | 2.2667 | 1.0167 | 6.0783 | 1.1    | 3.1106 | 27.1    | 0.1305 | 1.5031 |
| 4/20/2019 16:59 | 2.2333 | 1.3333 | 6.3143 | 1.1167 | 3.1091 | 27.1083 | 0.1326 | 1.4868 |
| 4/20/2019 17:00 | 2.1417 | 0.95   | 5.8185 | 1.2833 | 3.1212 | 27.19   | 0.1244 | 1.5155 |
| 4/20/2019 17:01 | 2.075  | 0.85   | 5.6238 | 0.7167 | 3.1173 | 27.1    | 0.1323 | 1.516  |

|                 |        |         |        |         |        |         |        |        |
|-----------------|--------|---------|--------|---------|--------|---------|--------|--------|
| 4/20/2019 17:02 | 2      | 0.95    | 5.9429 | 0.9833  | 3.1074 | 27.1    | 0.1145 | 1.5059 |
| 4/20/2019 17:03 | 1.9833 | 1.0333  | 5.8293 | 1.3333  | 3.0768 | 27.1545 | 0.1369 | 1.5385 |
| 4/20/2019 17:04 | 1.8917 | 1.1833  | 5.6558 | 1.2833  | 3.0792 | 27.2    | 0.1294 | 1.5474 |
| 4/20/2019 17:05 | 1.8417 | 1.1333  | 5.9728 | 1.4167  | 3.0854 | 27.3    | 0.1249 | 1.54   |
| 4/20/2019 17:06 | 1.8583 | 1.2     | 5.6998 | 1.2     | 3.1008 | 27.3917 | 0.1391 | 1.5344 |
| 4/20/2019 17:07 | 1.9    | 0.9333  | 5.7427 | 1.3167  | 3.0872 | 27.3833 | 0.1266 | 1.5043 |
| 4/20/2019 17:08 | 1.9    | 0.6833  | 5.4797 | 0.55    | 3.0639 | 27.3    | 0.1356 | 1.5503 |
| 4/20/2019 17:09 | 1.8833 | 1.05    | 5.6952 | 1.0167  | 3.0753 | 27.4091 | 0.1418 | 1.5472 |
| 4/20/2019 17:10 | 1.8167 | 0.1667  | 5.6955 | 0.7333  | 3.0874 | 27.5    | 0.1268 | 1.5598 |
| 4/20/2019 17:11 | 1.7667 | 0.9333  | 5.7047 | 1.4667  | 3.0846 | 27.5    | 0.1376 | 1.5678 |
| 4/20/2019 17:12 | 1.7    | 0.8667  | 5.6327 | 1.15    | 3.0623 | 27.575  | 0.1218 | 1.5421 |
| 4/20/2019 17:13 | 1.6667 | 0.4333  | 5.5472 | 1.05    | 3.0728 | 27.6083 | 0.1243 | 1.5231 |
| 4/20/2019 17:14 | 1.6667 | 1.0167  | 5.3788 | 0.6333  | 3.0563 | 27.7417 | 0.138  | 1.5288 |
| 4/20/2019 17:15 | 1.7    | 1.7     | 5.4992 | 0.5667  | 3.0526 | 27.8    | 0.1154 | 1.5649 |
| 4/20/2019 17:16 | 1.7    | -0.0333 | 5.5555 | 0.5333  | 3.0543 | 27.8    | 0.1369 | 1.5896 |
| 4/20/2019 17:17 | 1.7    | 0.4333  | 5.3995 | 0.4167  | 3.0454 | 27.8    | 0.1279 | 1.6272 |
| 4/20/2019 17:18 | 1.65   | 0.5667  | 5.6065 | 0.6167  | 3.0299 | 27.8    | 0.1387 | 1.6033 |
| 4/20/2019 17:19 | 1.6    | 0.5     | 5.4217 | 1       | 3.0273 | 27.8    | 0.146  | 1.6076 |
| 4/20/2019 17:20 | 1.525  | 0.1833  | 5.4707 | 0.7167  | 3.036  | 27.8273 | 0.1286 | 1.5857 |
| 4/20/2019 17:21 | 1.5    | 0.0833  | 5.309  | 0.4     | 3.0268 | 27.9    | 0.14   | 1.5632 |
| 4/20/2019 17:22 | 1.5583 | 1.15    | 5.5895 | 0.15    | 3.0353 | 27.9    | 0.135  | 1.5703 |
| 4/20/2019 17:23 | 1.5583 | 0.95    | 5.4373 | 0.5     | 3.0305 | 28.0333 | 0.1284 | 1.562  |
| 4/20/2019 17:24 | 1.5167 | 0.0167  | 5.3807 | 0.5     | 3.0038 | 28.12   | 0.1369 | 1.5553 |
| 4/20/2019 17:25 | 1.4667 | 0.0667  | 5.3677 | 0.4833  | 3.0089 | 28.2364 | 0.1227 | 1.5494 |
| 4/20/2019 17:26 | 1.4    | 0.4667  | 5.3655 | -0.1333 | 3.0233 | 28.3167 | 0.1349 | 1.5318 |
| 4/20/2019 17:27 | 1.4    | 0.3167  | 5.3282 | 0.3     | 3.0012 | 28.4    | 0.1304 | 1.5508 |
| 4/20/2019 17:28 | 1.4    | 0.9333  | 5.4563 | 0.1     | 2.9804 | 28.4667 | 0.1267 | 1.5633 |
| 4/20/2019 17:29 | 1.4    | 0.4167  | 5.2383 | 0.5333  | 2.9808 | 28.5833 | 0.1375 | 1.5692 |
| 4/20/2019 17:30 | 1.3083 | 0.1833  | 5.4268 | 0.1833  | 2.966  | 28.6364 | 0.1252 | 1.5799 |
| 4/20/2019 17:31 | 1.3    | 0.4333  | 5.4792 | 0.9167  | 2.9849 | 28.7    | 0.1254 | 1.5783 |
| 4/20/2019 17:32 | 1.2833 | 1.1333  | 5.4635 | 0.1667  | 2.991  | 28.7    | 0.1294 | 1.5954 |
| 4/20/2019 17:33 | 1.2083 | 0.1167  | 5.3928 | 0.7     | 2.9893 | 28.8    | 0.1206 | 1.5928 |
| 4/20/2019 17:34 | 1.2083 | 0.0333  | 5.3505 | 0.1833  | 2.9791 | 28.74   | 0.1318 | 1.6024 |
| 4/20/2019 17:35 | 1.2    | 0.1     | 5.1137 | 0.1     | 2.9623 | 28.8    | 0.1281 | 1.5664 |
| 4/20/2019 17:36 | 1.2    | 0.4833  | 5.1927 | 0.0167  | 2.957  | 28.8    | 0.1316 | 1.553  |
| 4/20/2019 17:37 | 1.2    | 0.3167  | 5.3445 | 0.4333  | 2.9311 | 28.7667 | 0.1384 | 1.5562 |
| 4/20/2019 17:38 | 1.1333 | 0.5833  | 5.3922 | 0.3833  | 2.9388 | 28.7    | 0.1191 | 1.5589 |
| 4/20/2019 17:39 | 1.1833 | 0.6333  | 5.267  | 0.5833  | 2.9614 | 28.7    | 0.1309 | 1.5888 |
| 4/20/2019 17:40 | 1.1667 | 0.6833  | 5.305  | 0.3333  | 2.9449 | 28.7    | 0.133  | 1.5908 |
| 4/20/2019 17:41 | 1.2    | 0.5167  | 5.2882 | 0.3833  | 2.9544 | 28.7    | 0.114  | 1.5778 |
| 4/20/2019 17:42 | 1.2083 | 0.0833  | 5.4617 | 0.0167  | 2.9312 | 28.6727 | 0.1332 | 1.587  |
| 4/20/2019 17:43 | 1.2833 | -0.1    | 5.3147 | 0.4333  | 2.9508 | 28.7    | 0.1202 | 1.6218 |
| 4/20/2019 17:44 | 1.2    | 0.5333  | 5.2257 | 0.3333  | 2.9364 | 28.7    | 0.1269 | 1.5971 |
| 4/20/2019 17:45 | 1.1583 | 0.3833  | 5.3848 | 0.75    | 2.9205 | 28.8    | 0.1374 | 1.5716 |
| 4/20/2019 17:46 | 1.1083 | -0.0833 | 5.222  | 0.6833  | 2.9194 | 28.84   | 0.1196 | 1.5683 |
| 4/20/2019 17:47 | 1.1833 | 0.1333  | 5.0317 | 0.5167  | 2.9253 | 28.8636 | 0.1304 | 1.5698 |
| 4/20/2019 17:48 | 1.2    | -0.0667 | 5.0505 | 0.0167  | 2.8918 | 28.8    | 0.1278 | 1.5988 |

|                 |        |         |        |         |        |         |        |        |
|-----------------|--------|---------|--------|---------|--------|---------|--------|--------|
| 4/20/2019 17:49 | 1.2    | 0.1     | 5.1455 | -0.7667 | 2.8897 | 28.8    | 0.1236 | 1.5688 |
| 4/20/2019 17:50 | 1.2    | 0.0833  | 5.3987 | 0.5333  | 2.8867 | 28.8455 | 0.1313 | 1.577  |
| 4/20/2019 17:51 | 1.2    | 0.4     | 5.31   | 0.6833  | 2.8822 | 28.9    | 0.1295 | 1.5988 |
| 4/20/2019 17:52 | 1.175  | 0.2667  | 5.2075 | -0.05   | 2.8701 | 28.9    | 0.1303 | 1.5839 |
| 4/20/2019 17:53 | 1.1    | 0.45    | 4.8905 | 0.25    | 2.8722 | 28.9546 | 0.1388 | 1.5972 |
| 4/20/2019 17:54 | 1.1167 | 0.5833  | 5.2577 | -0.0333 | 2.8668 | 29      | 0.1204 | 1.5895 |
| 4/20/2019 17:55 | 1.1    | -0.2667 | 5.3172 | -0.2833 | 2.8678 | 28.93   | 0.1379 | 1.5838 |
| 4/20/2019 17:56 | 1.1167 | 0.3833  | 5.193  | 0.4833  | 2.8638 | 28.9    | 0.1195 | 1.5961 |
| 4/20/2019 17:57 | 1.0833 | -0.1667 | 5.453  | -0.0833 | 2.879  | 28.9    | 0.1295 | 1.5993 |
| 4/20/2019 17:58 | 1.025  | -0.0833 | 5.4337 | -0.1833 | 2.8422 | 28.8727 | 0.1325 | 1.5769 |
| 4/20/2019 17:59 | 1      | -0.2167 | 5.089  | 0.8333  | 2.8551 | 28.8091 | 0.1243 | 1.5851 |
| 4/20/2019 18:00 | 1      | -0.3333 | 5.1715 | 0.15    | 2.8639 | 28.9    | 0.1304 | 1.5942 |
| 4/20/2019 18:01 | 0.9333 | 0.0667  | 5.2375 | 0.35    | 2.8568 | 28.9    | 0.1211 | 1.5763 |
| 4/20/2019 18:02 | 0.9    | -0.2667 | 5.5602 | 0.0333  | 2.8485 | 28.8182 | 0.1297 | 1.5928 |
| 4/20/2019 18:03 | 0.9    | 0.1     | 5.5253 | 0.5333  | 2.8305 | 28.8    | 0.1431 | 1.6015 |
| 4/20/2019 18:04 | 0.9    | 0.45    | 5.2152 | 0.5167  | 2.7995 | 28.7583 | 0.1236 | 1.5936 |
| 4/20/2019 18:05 | 0.9    | 0.65    | 5.1662 | 0.5167  | 2.8173 | 28.79   | 0.1271 | 1.5993 |
| 4/20/2019 18:06 | 0.8917 | 0.4     | 5.2302 | -0.1667 | 2.8183 | 28.7    | 0.1355 | 1.6245 |
| 4/20/2019 18:07 | 0.8333 | -0.2833 | 5.1457 | 0.2     | 2.8408 | 28.7    | 0.1154 | 1.6199 |
| 4/20/2019 18:08 | 0.8    | -0.1667 | 5.106  | -0.1833 | 2.8232 | 28.7    | 0.1415 | 1.6319 |
| 4/20/2019 18:09 | 0.8    | 0.4833  | 5.1448 | 0.2833  | 2.8039 | 28.7546 | 0.1176 | 1.6137 |
| 4/20/2019 18:10 | 0.8    | 0.4167  | 5.1772 | 0.2667  | 2.8102 | 28.8    | 0.1263 | 1.5985 |
| 4/20/2019 18:11 | 0.8    | -0.25   | 5.262  | 0.5333  | 2.8252 | 28.9    | 0.1282 | 1.6023 |
| 4/20/2019 18:12 | 0.8    | 0.6     | 5.3928 | 0       | 2.8206 | 28.8167 | 0.1219 | 1.6071 |
| 4/20/2019 18:13 | 0.8    | 0.0833  | 5.0952 | 0.2667  | 2.8263 | 28.8364 | 0.1362 | 1.6381 |
| 4/20/2019 18:14 | 0.8    | -0.8167 | 5.208  | 0.5833  | 2.8183 | 28.9    | 0.118  | 1.6282 |
| 4/20/2019 18:15 | 0.85   | -0.3333 | 5.3387 | -0.2    | 2.8181 | 28.9    | 0.131  | 1.6183 |
| 4/20/2019 18:16 | 0.9    | -0.2    | 5.5497 | 0.1667  | 2.8331 | 28.9455 | 0.1285 | 1.6    |
| 4/20/2019 18:17 | 0.8417 | -0.5167 | 5.5772 | -0.1833 | 2.8198 | 29      | 0.1215 | 1.636  |
| 4/20/2019 18:18 | 0.8    | 0.5667  | 5.4917 | 0.1667  | 2.8143 | 29      | 0.1323 | 1.6363 |
| 4/20/2019 18:19 | 0.8    | 0.4833  | 5.0677 | -0.6667 | 2.8118 | 29.0818 | 0.1233 | 1.5773 |
| 4/20/2019 18:20 | 0.825  | 0.4     | 5.2768 | -0.5333 | 2.8245 | 29.1    | 0.1293 | 1.5968 |
| 4/20/2019 18:21 | 0.9    | -0.3667 | 5.2257 | 0.0333  | 2.8412 | 29.1273 | 0.1245 | 1.5863 |
| 4/20/2019 18:22 | 0.9    | 0.1167  | 5.165  | 0.1333  | 2.8253 | 29.1167 | 0.1223 | 1.6125 |
| 4/20/2019 18:23 | 0.9167 | 0.1833  | 5.234  | -0.2667 | 2.8305 | 29.1    | 0.1315 | 1.6214 |
| 4/20/2019 18:24 | 0.9417 | -0.2333 | 5.5852 | 0.2667  | 2.8546 | 29.1    | 0.1261 | 1.637  |
| 4/20/2019 18:25 | 1      | -0.2    | 5.4288 | 0.0667  | 2.8511 | 29.1    | 0.1321 | 1.6554 |
| 4/20/2019 18:26 | 0.9417 | 0.1667  | 5.1148 | 0.0833  | 2.8498 | 29.0833 | 0.1313 | 1.6486 |
| 4/20/2019 18:27 | 1      | -0.1333 | 5.154  | -0.2333 | 2.8485 | 29      | 0.1185 | 1.6148 |
| 4/20/2019 18:28 | 1      | 0.4667  | 5.2577 | 0.0167  | 2.8645 | 29      | 0.1285 | 1.5783 |
| 4/20/2019 18:29 | 1      | -0.05   | 5.172  | -0.1333 | 2.8581 | 29      | 0.1238 | 1.578  |
| 4/20/2019 18:30 | 1      | 0.1     | 5.317  | 0.05    | 2.8498 | 29      | 0.1192 | 1.5835 |
| 4/20/2019 18:31 | 1      | 0.6667  | 5.0717 | -0.5833 | 2.8578 | 29      | 0.1253 | 1.6133 |
| 4/20/2019 18:32 | 0.9667 | -0.1833 | 4.9873 | 0.1667  | 2.8418 | 29      | 0.1183 | 1.6166 |
| 4/20/2019 18:33 | 0.9    | -0.5167 | 4.9893 | -0.25   | 2.842  | 29      | 0.1291 | 1.6373 |
| 4/20/2019 18:34 | 0.9    | 0.3333  | 4.9482 | 0.3833  | 2.8417 | 29      | 0.1264 | 1.6233 |
| 4/20/2019 18:35 | 0.9    | 0.05    | 5.1378 | -0.2333 | 2.8486 | 29      | 0.1272 | 1.6268 |

|                 |        |         |        |         |        |         |        |        |
|-----------------|--------|---------|--------|---------|--------|---------|--------|--------|
| 4/20/2019 18:36 | 0.9    | -0.6333 | 5.0892 | -0.5167 | 2.8458 | 29.03   | 0.1342 | 1.6379 |
| 4/20/2019 18:37 | 0.9    | -0.0667 | 5.1576 | -0.5    | 2.8498 | 29.1    | 0.1212 | 1.6078 |
| 4/20/2019 18:38 | 0.9    | 0.75    | 5.1246 | -0.2167 | 2.8482 | 29.1    | 0.1281 | 1.5888 |
| 4/20/2019 18:39 | 0.9083 | 0.7333  | 5.1214 | -0.6    | 2.8498 | 29.1091 | 0.1253 | 1.6134 |
| 4/20/2019 18:40 | 0.9    | 0.5     | 5.2346 | 0.05    | 2.851  | 29.2    | 0.1216 | 1.6193 |
| 4/20/2019 18:41 | 0.9    | -0.0667 | 5.2979 | -0.6167 | 2.8382 | 29.2    | 0.1366 | 1.6257 |
| 4/20/2019 18:42 | 0.9    | 0.0667  | 5.275  | -0.0167 | 2.8446 | 29.2    | 0.1229 | 1.6426 |
| 4/20/2019 18:43 | 0.9083 | 0.15    | 5.1624 | -0.25   | 2.8285 | 29.2    | 0.1313 | 1.6454 |
| 4/20/2019 18:44 | 1      | 0.45    | 5.2029 | 0.15    | 2.8358 | 29.2    | 0.1378 | 1.6478 |
| 4/20/2019 18:45 | 0.9083 | -0.6167 | 5.3808 | -0.2333 | 2.8427 | 29.2818 | 0.1141 | 1.6393 |
| 4/20/2019 18:46 | 0.9    | 0       | 5.4077 | -0.25   | 2.8281 | 29.3    | 0.1263 | 1.62   |
| 4/20/2019 18:47 | 0.9    | -0.25   | 5.1703 | 0.7167  | 2.8402 | 29.3182 | 0.1318 | 1.6242 |
| 4/20/2019 18:48 | 0.9    | -0.4167 | 5.1685 | 0.1     | 2.8124 | 29.3636 | 0.1176 | 1.6326 |
| 4/20/2019 18:49 | 0.9    | 0.0333  | 5.0643 | 0.05    | 2.8068 | 29.4    | 0.1369 | 1.6669 |
| 4/20/2019 18:50 | 0.9    | 0.2167  | 5.1663 | 0.0167  | 2.8302 | 29.4    | 0.1217 | 1.6596 |
| 4/20/2019 18:51 | 0.9    | 0.4167  | 5.0913 | 0.0667  | 2.8255 | 29.4    | 0.1315 | 1.6735 |
| 4/20/2019 18:52 | 0.95   | -0.1667 | 5.3048 | -0.6667 | 2.8138 | 29.4    | 0.1347 | 1.6639 |
| 4/20/2019 18:53 | 0.9583 | 0.3333  | 5.2993 | -0.8833 | 2.8272 | 29.4667 | 0.124  | 1.6487 |
| 4/20/2019 18:54 | 0.9    | 0.0667  | 4.925  | -0.0833 | 2.8161 | 29.5    | 0.1393 | 1.6248 |
| 4/20/2019 18:55 | 0.8833 | -0.2833 | 5.0347 | 0.1167  | 2.7969 | 29.5    | 0.1225 | 1.6165 |
| 4/20/2019 18:56 | 0.8833 | -0.6    | 5.0903 | -0.05   | 2.7817 | 29.5    | 0.1245 | 1.6503 |
| 4/20/2019 18:57 | 0.9    | 0.0833  | 5.0143 | -0.1333 | 2.785  | 29.5    | 0.1261 | 1.6613 |
| 4/20/2019 18:58 | 0.9    | 0.1333  | 4.8068 | -0.0667 | 2.796  | 29.6    | 0.1169 | 1.6486 |
| 4/20/2019 18:59 | 0.8333 | -0.6833 | 4.9494 | -0.2667 | 2.7954 | 29.6    | 0.1359 | 1.6517 |
| 4/20/2019 19:00 | 0.8    | -0.1167 | 5.4877 | -0.35   | 2.7694 | 29.6    | 0.1181 | 1.6934 |
| 4/20/2019 19:01 | 0.8    | 0.1333  | 4.9826 | -0.6333 | 2.762  | 29.525  | 0.1267 | 1.669  |
| 4/20/2019 19:02 | 0.8    | 0.3833  | 4.943  | -0.3333 | 2.7745 | 29.5    | 0.1324 | 1.7022 |
| 4/20/2019 19:03 | 0.8    | -0.4167 | 5.2967 | -0.0333 | 2.7688 | 29.5    | 0.123  | 1.6836 |
| 4/20/2019 19:04 | 0.8    | -0.1    | 5.1809 | -0.4667 | 2.7506 | 29.5    | 0.1274 | 1.6662 |
| 4/20/2019 19:05 | 0.8    | 0.05    | 5.3999 | 0.1333  | 2.7418 | 29.4636 | 0.1303 | 1.6658 |
| 4/20/2019 19:06 | 0.8    | 0.0333  | 5.3157 | -0.1833 | 2.757  | 29.3364 | 0.1169 | 1.6682 |
| 4/20/2019 19:07 | 0.8    | -0.3    | 5.0847 | 0.4333  | 2.7575 | 29.375  | 0.1331 | 1.6453 |
| 4/20/2019 19:08 | 0.8083 | -0.1333 | 5.0076 | 0.0833  | 2.7566 | 29.2909 | 0.1186 | 1.6219 |
| 4/20/2019 19:09 | 0.9    | 0.0667  | 5.3465 | -0.0667 | 2.7362 | 29.2    | 0.1195 | 1.6516 |
| 4/20/2019 19:10 | 0.825  | -0.4    | 5.2195 | 0.0667  | 2.7431 | 29.1833 | 0.1304 | 1.6487 |
| 4/20/2019 19:11 | 0.8    | -0.1833 | 5.0608 | -0.9    | 2.7523 | 29.1    | 0.1132 | 1.6662 |
| 4/20/2019 19:12 | 0.8    | 0.3667  | 5.1258 | -0.3667 | 2.7473 | 29      | 0.1357 | 1.6673 |
| 4/20/2019 19:13 | 0.8083 | -0.4833 | 5.072  | -0.2833 | 2.7456 | 28.9182 | 0.1224 | 1.6351 |
| 4/20/2019 19:14 | 0.825  | -0.1833 | 4.9827 | 0.2     | 2.7381 | 28.9    | 0.1233 | 1.6284 |
| 4/20/2019 19:15 | 0.8917 | -0.35   | 5.2555 | -0.3167 | 2.7524 | 28.9    | 0.1374 | 1.632  |
| 4/20/2019 19:16 | 0.9    | -0.4    | 5.1514 | -0.5    | 2.7391 | 28.8167 | 0.115  | 1.6279 |
| 4/20/2019 19:17 | 0.8917 | 0.7     | 5.0163 | -0.3    | 2.7371 | 28.8    | 0.1333 | 1.6406 |
| 4/20/2019 19:18 | 0.8    | -0.25   | 5.1375 | -0.1333 | 2.7246 | 28.875  | 0.1211 | 1.6267 |
| 4/20/2019 19:19 | 0.8    | -0.7167 | 5.0912 | 0.05    | 2.7312 | 28.9    | 0.1196 | 1.6327 |
| 4/20/2019 19:20 | 0.7833 | 0.55    | 5.0303 | 0.1     | 2.7201 | 28.9    | 0.1337 | 1.6546 |
| 4/20/2019 19:21 | 0.7917 | -0.2167 | 5.3693 | -0.85   | 2.7068 | 28.9833 | 0.1172 | 1.6929 |
| 4/20/2019 19:22 | 0.8    | -0.7333 | 5.2613 | -0.15   | 2.7192 | 29      | 0.1222 | 1.684  |

|                 |        |         |        |         |        |         |        |        |
|-----------------|--------|---------|--------|---------|--------|---------|--------|--------|
| 4/20/2019 19:23 | 0.8    | -0.0667 | 5.17   | -0.4667 | 2.7111 | 29.0546 | 0.1299 | 1.6946 |
| 4/20/2019 19:24 | 0.8    | 0.0667  | 5.1652 | -0.5333 | 2.7103 | 29.1    | 0.1157 | 1.673  |
| 4/20/2019 19:25 | 0.8    | -0.0167 | 5.2376 | -0.5667 | 2.6731 | 29.1    | 0.1247 | 1.6823 |
| 4/20/2019 19:26 | 0.8    | -0.3833 | 5.1278 | -0.3333 | 2.6789 | 29.1    | 0.121  | 1.6432 |
| 4/20/2019 19:27 | 0.8    | 0.3     | 5.1981 | -0.7333 | 2.6975 | 29.0333 | 0.122  | 1.6373 |
| 4/20/2019 19:28 | 0.8    | -0.1    | 5.3451 | -0.2833 | 2.6966 | 29.1    | 0.1293 | 1.6308 |
| 4/20/2019 19:29 | 0.8417 | 0.8333  | 5.0503 | -0.5333 | 2.6942 | 29.1636 | 0.1116 | 1.6498 |
| 4/20/2019 19:30 | 0.85   | 0.8667  | 5.0707 | -0.55   | 2.7035 | 29.075  | 0.1285 | 1.6673 |
| 4/20/2019 19:31 | 0.8667 | -0.7667 | 5.0978 | -0.05   | 2.7022 | 29      | 0.1239 | 1.667  |
| 4/20/2019 19:32 | 0.85   | -0.7167 | 5.2275 | -0.4    | 2.6978 | 29      | 0.1183 | 1.645  |
| 4/20/2019 19:33 | 0.8083 | -0.3167 | 5.2215 | 0.1     | 2.6933 | 28.9417 | 0.1331 | 1.6649 |
| 4/20/2019 19:34 | 0.8    | -0.1833 | 4.9868 | -0.25   | 2.687  | 28.8636 | 0.1128 | 1.6529 |
| 4/20/2019 19:35 | 0.8167 | -0.7333 | 5.2281 | -0.0833 | 2.6868 | 28.8    | 0.1289 | 1.6315 |
| 4/20/2019 19:36 | 0.8    | 0.4333  | 5.2083 | 0.1167  | 2.6864 | 28.8    | 0.125  | 1.6263 |
| 4/20/2019 19:37 | 0.8    | -0.5167 | 5.0833 | -0.7    | 2.6926 | 28.7    | 0.1228 | 1.6498 |
| 4/20/2019 19:38 | 0.8083 | 0.0167  | 5.1503 | -0.3667 | 2.6985 | 28.6583 | 0.126  | 1.6746 |
| 4/20/2019 19:39 | 0.8833 | -0.95   | 4.8893 | -0.1833 | 2.6881 | 28.18   | 0.12   | 1.6591 |
| 4/20/2019 19:40 | 0.8    | -0.5167 | 5.2363 | -0.6333 | 2.7077 | 27.1    | 0.1143 | 1.6636 |
| 4/20/2019 19:41 | 0.8583 | -0.5    | 5.0144 | 0       | 2.6988 | 25.5083 | 0.1286 | 1.6811 |
| 4/20/2019 19:42 | 0.8    | -0.35   | 4.7893 | -0.7667 | 2.6958 | 23.7083 | 0.1162 | 1.6539 |
| 4/20/2019 19:43 | 0.8    | 0.1333  | 5.0936 | 0.3333  | 2.7067 | 21.9546 | 0.1317 | 1.6571 |
| 4/20/2019 19:44 | 0.8    | -0.5667 | 5.3113 | -0.2833 | 2.7108 | 20.2455 | 0.1145 | 1.666  |
| 4/20/2019 19:45 | 0.8333 | -0.6667 | 5.1173 | 0.1167  | 2.6969 | 18.4833 | 0.1264 | 1.6634 |
| 4/20/2019 19:46 | 0.8583 | -1.2    | 4.8963 | -0.35   | 2.6993 | 16.7455 | 0.1315 | 1.6597 |
| 4/20/2019 19:47 | 0.8583 | 0.4833  | 5.0819 | -0.05   | 2.7177 | 14.9091 | 0.1169 | 1.6481 |
| 4/20/2019 19:48 | 0.8583 | 0.0167  | 5.1802 | -0.5    | 2.696  | 13.15   | 0.1315 | 1.6862 |
| 4/20/2019 19:49 | 0.8417 | -0.7333 | 4.9624 | 0.1     | 2.7172 | 11.4833 | 0.1236 | 1.6909 |
| 4/20/2019 19:50 | 0.8    | -0.1667 | 5.0573 | -0.0833 | 2.683  | 9.75    | 0.1171 | 1.6492 |
| 4/20/2019 19:51 | 0.7833 | -0.4667 | 5.1522 | -0.7167 | 2.69   | 8.3909  | 0.1314 | 1.6315 |
| 4/20/2019 19:52 | 0.7    | -0.0833 | 4.9824 | 0.2167  | 2.697  | 7.5091  | 0.1139 | 1.6428 |
| 4/20/2019 19:53 | 0.7    | -0.3167 | 5.1111 | -0.7667 | 2.6894 | 7.1364  | 0.1247 | 1.6519 |
| 4/20/2019 19:54 | 0.7    | -0.1167 | 4.8897 | -0.8    | 2.6898 | 7.1     | 0.1193 | 1.639  |
| 4/20/2019 19:55 | 0.7    | 0       | 5.2075 | -0.4833 | 2.6849 | 7.1     | 0.1189 | 1.6432 |
| 4/20/2019 19:56 | 0.6917 | 0.3     | 4.7739 | -0.4167 | 2.6902 | 7.1     | 0.1308 | 1.6595 |
| 4/20/2019 19:57 | 0.6833 | 0.4     | 5.0447 | -0.7833 | 2.6645 | 7.1     | 0.1171 | 1.671  |
| 4/20/2019 19:58 | 0.6833 | -0.2    | 5.0606 | -0.6167 | 2.6753 | 7.1     | 0.1203 | 1.6898 |
| 4/20/2019 19:59 | 0.6583 | 0.4167  | 5.1422 | -0.6167 | 2.6838 | 7.1     | 0.1198 | 1.6993 |
| 4/20/2019 20:00 | 0.6083 | -0.45   | 5.0348 | -0.0167 | 2.679  | 7.1     | 0.1136 | 1.6845 |
| 4/20/2019 20:01 | 0.6    | 0.25    | 4.7973 | -0.0667 | 2.6778 | 7.1     | 0.1219 | 1.6713 |
| 4/20/2019 20:02 | 0.6    | 0.0667  | 4.9719 | -0.4333 | 2.6945 | 7.1     | 0.113  | 1.6688 |
| 4/20/2019 20:03 | 0.6    | 0.2     | 5.1238 | 0.1     | 2.6824 | 7.1667  | 0.1213 | 1.6871 |
| 4/20/2019 20:04 | 0.6583 | -0.0167 | 5.015  | 0       | 2.6934 | 7.2417  | 0.1237 | 1.6523 |
| 4/20/2019 20:05 | 0.7    | -0.0167 | 5.0427 | 0.2833  | 2.6866 | 7.2     | 0.113  | 1.6388 |
| 4/20/2019 20:06 | 0.7    | -0.55   | 4.8575 | -0.25   | 2.6807 | 7.2     | 0.1268 | 1.6546 |
| 4/20/2019 20:07 | 0.7    | -0.3167 | 5.1188 | -0.2667 | 2.6656 | 7.3     | 0.1227 | 1.6812 |
| 4/20/2019 20:08 | 0.6833 | -0.0667 | 5.0617 | 0.0833  | 2.6642 | 7.3     | 0.1133 | 1.6594 |
| 4/20/2019 20:09 | 0.6583 | -0.2667 | 4.8718 | -0.2167 | 2.6707 | 7.275   | 0.1255 | 1.6523 |

|                 |        |         |        |         |        |        |        |        |
|-----------------|--------|---------|--------|---------|--------|--------|--------|--------|
| 4/20/2019 20:10 | 0.675  | -0.1    | 4.872  | -0.5    | 2.6716 | 7.2    | 0.1148 | 1.6537 |
| 4/20/2019 20:11 | 0.7    | -0.5333 | 4.9443 | -0.25   | 2.6592 | 7.2    | 0.124  | 1.6706 |
| 4/20/2019 20:12 | 0.7    | 0.05    | 4.7805 | -0.3167 | 2.6582 | 7.2    | 0.1289 | 1.6669 |
| 4/20/2019 20:13 | 0.7    | 0.5667  | 5.02   | 0.1333  | 2.6524 | 7.2182 | 0.1129 | 1.6669 |
| 4/20/2019 20:14 | 0.7    | 0.2     | 4.9283 | -0.3333 | 2.6733 | 7.3    | 0.129  | 1.6703 |
| 4/20/2019 20:15 | 0.7    | -0.6667 | 4.857  | -0.2167 | 2.6718 | 7.2364 | 0.1114 | 1.6644 |
| 4/20/2019 20:16 | 0.8    | -0.55   | 4.866  | -0.4833 | 2.646  | 7.1    | 0.1245 | 1.6409 |
| 4/20/2019 20:17 | 0.8    | 0.1     | 5.004  | 0.2333  | 2.6607 | 7.1    | 0.1207 | 1.6694 |
| 4/20/2019 20:18 | 0.8    | 0.3167  | 5.0427 | -0.3167 | 2.6683 | 7.0182 | 0.1206 | 1.6683 |
| 4/20/2019 20:19 | 0.8    | -0.3    | 5.237  | -0.05   | 2.6546 | 7      | 0.129  | 1.6663 |
| 4/20/2019 20:20 | 0.8    | -0.3167 | 5.144  | -0.1833 | 2.6363 | 7      | 0.1088 | 1.6649 |
| 4/20/2019 20:21 | 0.8    | 0.0167  | 4.8538 | -0.2167 | 2.6482 | 7      | 0.1237 | 1.6873 |
| 4/20/2019 20:22 | 0.8    | 0.9333  | 5.3307 | -0.0833 | 2.6404 | 7      | 0.1239 | 1.6613 |
| 4/20/2019 20:23 | 0.7917 | -0.0667 | 5.0978 | 0.35    | 2.6421 | 7      | 0.1121 | 1.6713 |
| 4/20/2019 20:24 | 0.75   | 0.4167  | 5.0107 | -0.05   | 2.6336 | 7      | 0.1262 | 1.663  |
| 4/20/2019 20:25 | 0.7667 | 0.2333  | 5.3325 | -0.6667 | 2.6384 | 7      | 0.1262 | 1.6443 |
| 4/20/2019 20:26 | 0.7833 | -0.85   | 5.169  | 0.1167  | 2.6597 | 6.99   | 0.1257 | 1.6573 |
| 4/20/2019 20:27 | 0.8    | -0.5833 | 4.9887 | 0.3833  | 2.6484 | 6.9    | 0.1309 | 1.6601 |
| 4/20/2019 20:28 | 0.8    | -0.5167 | 4.9078 | -0.4333 | 2.6314 | 6.9    | 0.1216 | 1.676  |
| 4/20/2019 20:29 | 0.8333 | -0.15   | 4.9707 | -0.3833 | 2.6528 | 6.9    | 0.1322 | 1.6979 |
| 4/20/2019 20:30 | 0.8917 | -0.8333 | 5.1477 | 0.0667  | 2.6531 | 6.9909 | 0.1245 | 1.6844 |
| 4/20/2019 20:31 | 0.9    | -0.6167 | 5.0923 | -0.0667 | 2.6305 | 7      | 0.1232 | 1.695  |
| 4/20/2019 20:32 | 0.85   | 0.3833  | 5.0857 | 0.1     | 2.6434 | 7      | 0.1303 | 1.6711 |
| 4/20/2019 20:33 | 0.8    | 0.1     | 4.9088 | 0.2333  | 2.6448 | 7      | 0.1212 | 1.6807 |
| 4/20/2019 20:34 | 0.8    | -0.35   | 4.9952 | -0.0333 | 2.6143 | 7      | 0.127  | 1.6977 |
| 4/20/2019 20:35 | 0.8    | 0.1     | 4.7723 | -0.4    | 2.632  | 7      | 0.1277 | 1.6888 |
| 4/20/2019 20:36 | 0.8    | -0.1167 | 4.7643 | -0.1167 | 2.632  | 7      | 0.1135 | 1.6808 |
| 4/20/2019 20:37 | 0.875  | -0.1    | 5.013  | -0.1167 | 2.6153 | 7      | 0.1311 | 1.6763 |
| 4/20/2019 20:38 | 0.85   | 0.9167  | 5.0317 | -0.3167 | 2.6047 | 7      | 0.1247 | 1.6677 |
| 4/20/2019 20:39 | 0.8    | 0.3     | 4.9857 | -0.3167 | 2.6088 | 7      | 0.1259 | 1.6833 |
| 4/20/2019 20:40 | 0.8    | -0.15   | 4.956  | 0.1167  | 2.6159 | 7.0333 | 0.1208 | 1.6669 |
| 4/20/2019 20:41 | 0.8    | -0.0667 | 4.943  | 0.2333  | 2.6238 | 7.1    | 0.1087 | 1.6778 |
| 4/20/2019 20:42 | 0.8    | 0.2333  | 4.9562 | -0.4167 | 2.6282 | 7.1    | 0.1226 | 1.6453 |
| 4/20/2019 20:43 | 0.8    | 0.55    | 4.7813 | -0.1333 | 2.6225 | 7.1    | 0.1261 | 1.657  |
| 4/20/2019 20:44 | 0.8    | -0.1167 | 5.2092 | -0.3167 | 2.6294 | 7.1    | 0.1143 | 1.6658 |
| 4/20/2019 20:45 | 0.8    | -0.3667 | 4.8967 | 0.05    | 2.6254 | 7.1    | 0.1272 | 1.6603 |
| 4/20/2019 20:46 | 0.8667 | -0.0167 | 4.7913 | -0.65   | 2.6091 | 7.1    | 0.1139 | 1.6596 |
| 4/20/2019 20:47 | 0.9    | -0.15   | 4.804  | -0.4    | 2.5947 | 7.1    | 0.1223 | 1.6455 |
| 4/20/2019 20:48 | 0.9    | -0.35   | 4.7233 | -0.2333 | 2.6042 | 7.1    | 0.1237 | 1.6713 |
| 4/20/2019 20:49 | 0.9    | 0.85    | 5.0177 | -0.1833 | 2.6155 | 7.1    | 0.1149 | 1.6648 |
| 4/20/2019 20:50 | 0.9    | 0.1167  | 5.1348 | -0.3667 | 2.6155 | 7.1    | 0.1334 | 1.6586 |
| 4/20/2019 20:51 | 0.9    | -0.1333 | 5.0848 | 0.2333  | 2.6338 | 7.1    | 0.1186 | 1.6727 |
| 4/20/2019 20:52 | 0.9    | -0.3167 | 5.2497 | 0.0833  | 2.6173 | 7.1    | 0.1185 | 1.6577 |
| 4/20/2019 20:53 | 0.9    | -0.2167 | 4.6617 | 0.0833  | 2.6067 | 7.1    | 0.121  | 1.6691 |
| 4/20/2019 20:54 | 0.9    | 0.05    | 4.9713 | -0.05   | 2.6111 | 7.1    | 0.1138 | 1.673  |
| 4/20/2019 20:55 | 0.8083 | 0       | 4.9462 | -0.55   | 2.6038 | 7.0364 | 0.1262 | 1.6949 |
| 4/20/2019 20:56 | 0.8    | -0.0667 | 4.9525 | 0.0333  | 2.6065 | 7      | 0.1284 | 1.697  |

|                 |        |         |        |         |        |        |        |        |
|-----------------|--------|---------|--------|---------|--------|--------|--------|--------|
| 4/20/2019 20:57 | 0.8    | -0.05   | 4.9955 | -0.2    | 2.6045 | 7      | 0.1179 | 1.6927 |
| 4/20/2019 20:58 | 0.875  | 0.0667  | 4.8633 | -0.1    | 2.6213 | 7      | 0.1334 | 1.7112 |
| 4/20/2019 20:59 | 0.9    | -0.25   | 4.7747 | -0.1    | 2.6127 | 7      | 0.1198 | 1.6853 |
| 4/20/2019 21:00 | 0.9    | -0.2833 | 5.1182 | -0.25   | 2.5931 | 7      | 0.1327 | 1.6751 |
| 4/20/2019 21:01 | 0.8    | 0.0667  | 4.9935 | -0.2167 | 2.6082 | 7      | 0.1261 | 1.6604 |
| 4/20/2019 21:02 | 0.8    | 0.15    | 4.8852 | -0.8    | 2.623  | 7      | 0.1198 | 1.6718 |
| 4/20/2019 21:03 | 0.8    | -0.3    | 4.7128 | -0.8167 | 2.6263 | 7      | 0.1318 | 1.6609 |
| 4/20/2019 21:04 | 0.8    | -0.45   | 4.7935 | 0.4667  | 2.6069 | 7      | 0.1164 | 1.664  |
| 4/20/2019 21:05 | 0.8    | 0.6     | 4.637  | 0.25    | 2.6157 | 7      | 0.1296 | 1.6788 |
| 4/20/2019 21:06 | 0.8    | 0.1333  | 4.8983 | -0.2333 | 2.6203 | 7      | 0.1317 | 1.6623 |
| 4/20/2019 21:07 | 0.7917 | -0.1833 | 4.7257 | 0.1667  | 2.6328 | 7      | 0.1201 | 1.6708 |
| 4/20/2019 21:08 | 0.725  | 0.1833  | 4.8637 | -0.35   | 2.6172 | 7      | 0.1312 | 1.685  |
| 4/20/2019 21:09 | 0.75   | -0.2667 | 4.7773 | -0.2667 | 2.6044 | 7.1    | 0.1244 | 1.6748 |
| 4/20/2019 21:10 | 0.7    | 0       | 4.968  | -0.3833 | 2.6265 | 7.1    | 0.12   | 1.6775 |
| 4/20/2019 21:11 | 0.7    | -0.3833 | 4.6863 | -0.65   | 2.6183 | 7.1    | 0.1331 | 1.6865 |
| 4/20/2019 21:12 | 0.7    | 0.4333  | 4.7482 | -0.2833 | 2.6292 | 7.1    | 0.1163 | 1.6812 |
| 4/20/2019 21:13 | 0.7    | 0.6167  | 4.9987 | -0.6667 | 2.6411 | 7.1    | 0.1318 | 1.6804 |
| 4/20/2019 21:14 | 0.7    | 0.0333  | 4.6328 | -0.1833 | 2.6414 | 7.1    | 0.1238 | 1.6799 |
| 4/20/2019 21:15 | 0.7    | 0.35    | 4.7107 | 0.0667  | 2.6407 | 7.1    | 0.1227 | 1.6843 |
| 4/20/2019 21:16 | 0.75   | -0.0667 | 4.759  | 0.0167  | 2.6309 | 7.1    | 0.1362 | 1.6978 |
| 4/20/2019 21:17 | 0.8    | -0.0333 | 4.9363 | -0.2    | 2.633  | 7.0182 | 0.1208 | 1.7142 |
| 4/20/2019 21:18 | 0.8167 | -0.65   | 4.965  | -0.25   | 2.6348 | 7.0917 | 0.1243 | 1.7118 |
| 4/20/2019 21:19 | 0.8333 | 0.15    | 4.618  | 0.2     | 2.6455 | 7.075  | 0.1303 | 1.7029 |
| 4/20/2019 21:20 | 0.85   | 0.1833  | 4.9302 | -0.2667 | 2.6705 | 7.1    | 0.1218 | 1.687  |
| 4/20/2019 21:21 | 0.8    | 0.2833  | 5.022  | 0.1     | 2.6957 | 7.0333 | 0.1365 | 1.6635 |
| 4/20/2019 21:22 | 0.8    | 0.2     | 4.8818 | -0.4    | 2.6803 | 7      | 0.1211 | 1.6706 |
| 4/20/2019 21:23 | 0.8    | 0.1833  | 5.097  | -0.1    | 2.6734 | 7      | 0.1232 | 1.6576 |
| 4/20/2019 21:24 | 0.8    | 0.45    | 4.831  | 0.8     | 2.6641 | 7      | 0.1376 | 1.6878 |
| 4/20/2019 21:25 | 0.8    | 0.1667  | 4.7702 | -0.2833 | 2.7272 | 6.9083 | 0.1304 | 1.6896 |
| 4/20/2019 21:26 | 0.825  | 0.1     | 4.7215 | -0.3833 | 2.7168 | 6.9    | 0.1329 | 1.69   |
| 4/20/2019 21:27 | 0.8833 | 0.0333  | 4.9025 | -0.35   | 2.6986 | 6.8667 | 0.1277 | 1.6986 |
| 4/20/2019 21:28 | 0.9    | -0.4833 | 4.5977 | -0.25   | 2.7318 | 6.84   | 0.1222 | 1.6963 |
| 4/20/2019 21:29 | 0.975  | -0.3333 | 4.609  | 0.3167  | 2.7217 | 6.9    | 0.1393 | 1.6733 |
| 4/20/2019 21:30 | 1      | -0.0667 | 4.9772 | 0.2     | 2.7244 | 6.9    | 0.1261 | 1.6673 |
| 4/20/2019 21:31 | 0.9917 | 0.3667  | 4.6278 | 0.3333  | 2.7161 | 6.9    | 0.133  | 1.6738 |
| 4/20/2019 21:32 | 1      | -0.4333 | 4.9485 | 0.1833  | 2.7118 | 6.9    | 0.1306 | 1.6786 |
| 4/20/2019 21:33 | 1      | 0.25    | 5.003  | 0.1833  | 2.7248 | 6.8667 | 0.1252 | 1.6745 |
| 4/20/2019 21:34 | 1.0167 | -0.3167 | 4.7747 | 0.2833  | 2.7339 | 6.8    | 0.1365 | 1.6739 |
| 4/20/2019 21:35 | 1      | 0.2667  | 4.8293 | -0.3    | 2.7303 | 6.8909 | 0.1243 | 1.6837 |
| 4/20/2019 21:36 | 1      | -0.2167 | 4.845  | -0.1333 | 2.727  | 6.9    | 0.1278 | 1.6832 |
| 4/20/2019 21:37 | 1      | 0.3167  | 4.8613 | -0.05   | 2.727  | 6.9    | 0.1401 | 1.7033 |
| 4/20/2019 21:38 | 1      | 0.1167  | 4.8473 | -0.4333 | 2.7412 | 6.9    | 0.122  | 1.7213 |
| 4/20/2019 21:39 | 1.0833 | 0.4667  | 4.9099 | -0.0667 | 2.7248 | 6.9    | 0.1396 | 1.7276 |
| 4/20/2019 21:40 | 1.1    | -0.05   | 4.9475 | -0.5833 | 2.737  | 6.9    | 0.1281 | 1.7264 |
| 4/20/2019 21:41 | 1.1    | -0.5833 | 4.6704 | 0.45    | 2.7354 | 6.9    | 0.136  | 1.7225 |
| 4/20/2019 21:42 | 1.0917 | -0.2    | 4.9098 | -0.1    | 2.7314 | 6.9    | 0.1375 | 1.7274 |
| 4/20/2019 21:43 | 1.0333 | 0.2667  | 4.6576 | 0.0667  | 2.7282 | 6.9    | 0.1267 | 1.7446 |

|                 |        |         |        |         |        |        |        |        |
|-----------------|--------|---------|--------|---------|--------|--------|--------|--------|
| 4/20/2019 21:44 | 1      | -0.8167 | 4.8243 | -0.0667 | 2.7576 | 6.9    | 0.1351 | 1.752  |
| 4/20/2019 21:45 | 1      | 0.05    | 4.6824 | -0.15   | 2.734  | 6.9    | 0.1314 | 1.7409 |
| 4/20/2019 21:46 | 0.9833 | -0.55   | 4.6301 | 0.15    | 2.7267 | 6.9636 | 0.1282 | 1.735  |
| 4/20/2019 21:47 | 0.9    | 0.1667  | 4.6003 | 0.3667  | 2.7236 | 6.9    | 0.1387 | 1.7053 |
| 4/20/2019 21:48 | 0.9    | -0.35   | 4.6527 | -0.1833 | 2.7251 | 6.9    | 0.1284 | 1.7059 |
| 4/20/2019 21:49 | 0.8583 | -0.4667 | 4.5855 | 0.1167  | 2.7303 | 6.9    | 0.1412 | 1.6975 |
| 4/20/2019 21:50 | 0.9    | -0.2167 | 4.9078 | 0       | 2.7318 | 6.9    | 0.1318 | 1.6969 |
| 4/20/2019 21:51 | 0.9    | -0.3167 | 4.6945 | -0.7167 | 2.741  | 6.9    | 0.137  | 1.6768 |
| 4/20/2019 21:52 | 0.9    | 0.3667  | 4.8118 | -0.35   | 2.7143 | 6.9    | 0.1394 | 1.6881 |
| 4/20/2019 21:53 | 0.9    | -0.3    | 4.9123 | -0.4333 | 2.7056 | 6.9    | 0.1315 | 1.6927 |
| 4/20/2019 21:54 | 0.9    | -0.2667 | 4.9751 | 0.3833  | 2.699  | 6.9    | 0.1379 | 1.6986 |
| 4/20/2019 21:55 | 0.8583 | 0.6     | 4.7922 | 0.0333  | 2.7043 | 6.9    | 0.1318 | 1.7121 |
| 4/20/2019 21:56 | 0.8    | 0.2833  | 4.5072 | -0.0167 | 2.7131 | 6.9    | 0.1349 | 1.7054 |
| 4/20/2019 21:57 | 0.7917 | -0.0167 | 4.3498 | -0.0167 | 2.7182 | 6.9    | 0.1368 | 1.7073 |
| 4/20/2019 21:58 | 0.8    | 0.1     | 4.5018 | -0.6    | 2.7151 | 6.9    | 0.1281 | 1.7156 |
| 4/20/2019 21:59 | 0.8    | 0.4167  | 4.8738 | -0.0667 | 2.7176 | 6.9    | 0.1302 | 1.7124 |
| 4/20/2019 22:00 | 0.8    | -0.3167 | 4.6472 | -0.3167 | 2.7245 | 6.9    | 0.1358 | 1.7288 |
| 4/20/2019 22:01 | 0.8    | 0.8833  | 4.5825 | -0.0667 | 2.7251 | 6.9    | 0.1264 | 1.7178 |
| 4/20/2019 22:02 | 0.8    | -0.1167 | 4.6991 | -0.3833 | 2.7046 | 6.9    | 0.1385 | 1.7231 |
| 4/20/2019 22:03 | 0.8    | 0.3333  | 4.5021 | -0.2833 | 2.7132 | 6.9    | 0.1215 | 1.6959 |
| 4/20/2019 22:04 | 0.85   | 0.4167  | 4.5236 | 0       | 2.6863 | 6.9364 | 0.1412 | 1.7025 |
| 4/20/2019 22:05 | 0.9    | -0.3667 | 4.7204 | -0.4667 | 2.6962 | 7      | 0.1264 | 1.7132 |
| 4/20/2019 22:06 | 0.8917 | -0.0667 | 4.6298 | -0.2    | 2.6938 | 7      | 0.1294 | 1.6954 |
| 4/20/2019 22:07 | 0.8583 | -0.1167 | 4.6327 | -0.1833 | 2.6935 | 7      | 0.1361 | 1.7102 |
| 4/20/2019 22:08 | 0.8    | 0.1667  | 4.7475 | -0.1667 | 2.7161 | 7      | 0.1236 | 1.7272 |
| 4/20/2019 22:09 | 0.8    | 0.25    | 4.7368 | -0.2333 | 2.7013 | 7      | 0.1338 | 1.7222 |
| 4/20/2019 22:10 | 0.8333 | -0.7833 | 4.6585 | -0.55   | 2.69   | 7      | 0.1289 | 1.7284 |
| 4/20/2019 22:11 | 0.825  | -0.0833 | 4.8678 | 0.05    | 2.6783 | 7      | 0.1323 | 1.7665 |
| 4/20/2019 22:12 | 0.8083 | -0.3333 | 4.5713 | -0.6    | 2.6658 | 7.0273 | 0.1406 | 1.7764 |
| 4/20/2019 22:13 | 0.75   | 0.1833  | 4.4198 | -0.45   | 2.6525 | 7.0091 | 0.1201 | 1.7713 |
| 4/20/2019 22:14 | 0.7    | 0.0167  | 4.4575 | -0.8333 | 2.6597 | 7.1    | 0.1303 | 1.7643 |
| 4/20/2019 22:15 | 0.7583 | -0.1833 | 4.4998 | -0.2    | 2.656  | 7.1    | 0.1309 | 1.7618 |
| 4/20/2019 22:16 | 0.8083 | 0.1     | 4.3406 | -0.5    | 2.6548 | 7.1    | 0.129  | 1.7654 |
| 4/20/2019 22:17 | 0.9    | -0.2    | 4.5983 | -0.2    | 2.6646 | 7.1    | 0.1378 | 1.7386 |
| 4/20/2019 22:18 | 0.9    | -0.1167 | 4.6805 | -0.2833 | 2.6828 | 7.0364 | 0.1251 | 1.7485 |
| 4/20/2019 22:19 | 0.875  | -0.7667 | 4.7313 | -0.5667 | 2.6553 | 7      | 0.1389 | 1.7335 |
| 4/20/2019 22:20 | 0.8167 | 0.1167  | 4.5266 | -0.2833 | 2.6608 | 7      | 0.1387 | 1.7574 |
| 4/20/2019 22:21 | 0.8083 | -0.2167 | 4.6688 | -0.55   | 2.6581 | 7      | 0.1295 | 1.7468 |
| 4/20/2019 22:22 | 0.8    | -0.5    | 4.6113 | -0.3333 | 2.6246 | 7      | 0.1362 | 1.7377 |
| 4/20/2019 22:23 | 0.8    | -0.45   | 4.3672 | -0.2667 | 2.6292 | 7      | 0.1219 | 1.7229 |
| 4/20/2019 22:24 | 0.825  | -0.4167 | 4.6104 | -0.6167 | 2.655  | 7      | 0.1336 | 1.7301 |
| 4/20/2019 22:25 | 0.9    | 0.1     | 4.7832 | -0.8    | 2.6541 | 7      | 0.1306 | 1.7518 |
| 4/20/2019 22:26 | 0.9    | -0.3    | 4.5003 | -0.8167 | 2.6453 | 7      | 0.1284 | 1.7386 |
| 4/20/2019 22:27 | 0.9    | 0.5167  | 4.4905 | -0.5167 | 2.6384 | 6.9727 | 0.1339 | 1.7368 |
| 4/20/2019 22:28 | 0.9    | 0.2167  | 4.5423 | -0.5333 | 2.6236 | 6.93   | 0.1299 | 1.7406 |
| 4/20/2019 22:29 | 0.8667 | 0.15    | 4.4875 | -0.4    | 2.6168 | 6.9    | 0.1368 | 1.732  |
| 4/20/2019 22:30 | 0.8417 | -0.0167 | 4.3805 | -0.4333 | 2.5858 | 6.9364 | 0.1287 | 1.7372 |



|                 |        |         |        |         |        |        |        |        |
|-----------------|--------|---------|--------|---------|--------|--------|--------|--------|
| 4/20/2019 22:31 | 0.8    | -0.0167 | 4.0986 | -0.6333 | 2.6066 | 7      | 0.1304 | 1.7526 |
| 4/20/2019 22:32 | 0.8    | -0.0667 | 4.3848 | 8.0167  | 2.6108 | 7      | 0.1337 | 1.7443 |
| 4/20/2019 22:33 | 0.7417 | -0.1667 | 4.5172 | -0.5333 | 2.5951 | 7      | 0.1185 | 1.7333 |
| 4/20/2019 22:34 | 0.7    | 0.0833  | 4.3886 | -0.4083 | 2.5865 | 7      | 0.1308 | 1.7498 |
| 4/20/2019 22:35 | 0.65   | 0.0167  | 4.5508 | 0.0167  | 2.5955 | 7      | 0.1244 | 1.7271 |
| 4/20/2019 22:36 | 0.6    | -0.2    | 4.3806 | -0.125  | 2.5849 | 7      | 0.1287 | 1.7278 |
| 4/20/2019 22:37 | 0.6083 | -0.5833 | 4.4418 | 0.2083  | 2.6002 | 7      | 0.134  | 1.7093 |
| 4/20/2019 22:38 | 0.6    | -0.5167 | 4.3443 | 0.7583  | 2.601  | 7      | 0.1251 | 1.7353 |
| 4/20/2019 22:39 | 0.575  | 0.05    | 4.5678 |         | 2.5809 | 7      | 0.1437 | 1.7328 |
| 4/20/2019 22:40 | 0.5333 | -0.2167 | 4.3269 |         | 2.5558 | 7.0182 | 0.1233 | 1.753  |
| 4/20/2019 22:41 | 0.575  | -0.15   | 4.4664 |         | 2.5488 | 7.1    | 0.1215 | 1.7679 |
| 4/20/2019 22:42 | 0.6    | 0.05    | 4.3658 |         | 2.5481 | 7.1    | 0.1319 | 1.7146 |
| 4/20/2019 22:43 | 0.6    | -0.2833 | 4.4442 |         | 2.5348 | 7.1    | 0.1272 | 1.7226 |
| 4/20/2019 22:44 | 0.6    | 0.0667  | 4.663  |         | 2.5393 | 7.0727 | 0.1358 | 1.7321 |
| 4/20/2019 22:45 | 0.6    | 0.1833  | 4.6082 |         | 2.5198 | 7.1    | 0.1332 | 1.7425 |
| 4/20/2019 22:46 | 0.5167 | -0.5167 | 4.3486 | 1       | 2.5218 | 7.0083 | 0.1209 | 1.762  |
| 4/20/2019 22:47 | 0.5    | 0.0167  | 4.4009 | -0.0833 | 2.5258 | 7.1    | 0.1334 | 1.7403 |
| 4/20/2019 22:48 | 0.5417 | -0.05   | 4.4469 | -0.1    | 2.5077 | 7.0333 | 0.1178 | 1.7414 |
| 4/20/2019 22:49 | 0.6    | 1.1167  | 4.581  | -0.2375 | 2.5136 | 7      | 0.1392 | 1.7335 |
| 4/20/2019 22:50 | 0.6    | -0.0167 | 4.0764 | 0.0286  | 2.5075 | 7.0583 | 0.1247 | 1.7243 |
| 4/20/2019 22:51 | 0.6    | 0.0333  | 4.2773 | -0.625  | 2.513  | 7.0091 | 0.1272 | 1.742  |
| 4/20/2019 22:52 | 0.6    | -0.2    | 4.4817 | 1.4833  | 2.4997 | 7      | 0.1364 | 1.7378 |
| 4/20/2019 22:53 | 0.6    | 0.0167  | 4.5723 | 1.3333  | 2.4917 | 7.04   | 0.123  | 1.7403 |
| 4/20/2019 22:54 | 0.6    | -0.9833 | 4.5284 | 0.6833  | 2.4824 | 7.0583 | 0.1323 | 1.7438 |
| 4/20/2019 22:55 | 0.6    | -0.3167 | 4.3476 | -0.2333 | 2.4968 | 7      | 0.1239 | 1.7343 |
| 4/20/2019 22:56 | 0.6    | -0.6333 | 4.4784 | -0.1    | 2.4768 | 7.0909 | 0.1306 | 1.718  |
| 4/20/2019 22:57 | 0.6    | -0.4667 | 4.4292 | 0.2583  | 2.4717 | 7.025  | 0.1365 | 1.7045 |
| 4/20/2019 22:58 | 0.6583 | -0.8333 | 4.5108 | 0.05    | 2.4814 | 7.1    | 0.1166 | 1.7464 |
| 4/20/2019 22:59 | 0.7    | -0.1333 | 4.3833 | -0.0417 | 2.4623 | 7.1    | 0.1382 | 1.7569 |
| 4/20/2019 23:00 | 0.7    | -0.2167 | 4.7068 | 0.1667  | 2.4618 | 7.1    | 0.1253 | 1.7419 |
| 4/20/2019 23:01 | 0.65   | -0.2667 | 4.3875 | -0.3333 | 2.4483 | 7.1    | 0.1202 | 1.7548 |
| 4/20/2019 23:02 | 0.6167 | -0.2    | 4.6224 | -0.0333 | 2.4493 | 7.1    | 0.1317 | 1.7491 |
| 4/20/2019 23:03 | 0.6167 | -0.3833 | 4.3568 | -0.65   | 2.4462 | 7.1    | 0.1173 | 1.7682 |
| 4/20/2019 23:04 | 0.6    | -0.9833 | 4.5352 | -0.1833 | 2.4482 | 7.1    | 0.133  | 1.7627 |
| 4/20/2019 23:05 | 0.6    | -0.25   | 4.4423 | 0.25    | 2.4366 | 7.1    | 0.121  | 1.7551 |
| 4/20/2019 23:06 | 0.65   | -0.55   | 4.6848 | -0.2833 | 2.4538 | 7.1    | 0.1177 | 1.7769 |
| 4/20/2019 23:07 | 0.7    | -0.6833 | 4.2903 | -0.25   | 2.4382 | 7.1    | 0.1253 | 1.7582 |
| 4/20/2019 23:08 | 0.7    | -1.15   | 4.6028 | -0.5    | 2.4366 | 7.1    | 0.1118 | 1.736  |
| 4/20/2019 23:09 | 0.7    | -0.8    | 4.3375 | -0.625  | 2.4375 | 7.1818 | 0.1378 | 1.7354 |
| 4/20/2019 23:10 | 0.6917 | -0.3833 | 4.3955 | -0.5333 | 2.4102 | 7.1091 | 0.1293 | 1.7352 |
| 4/20/2019 23:11 | 0.6    | -0.15   | 4.5157 | -0.825  | 2.4104 | 7.1    | 0.1219 | 1.7394 |
| 4/20/2019 23:12 | 0.6    | -0.4167 | 4.349  | 0.025   | 2.4188 | 7.1833 | 0.1319 | 1.7329 |
| 4/20/2019 23:13 | 0.6    | 0       | 4.3373 | -0.3583 | 2.4193 | 7.2    | 0.1185 | 1.7279 |
| 4/20/2019 23:14 | 0.6    | 0.0667  | 4.3068 | -0.2083 | 2.4302 | 7.2    | 0.1287 | 1.7253 |
| 4/20/2019 23:15 | 0.5083 | -1.3    | 4.4603 | -0.1583 | 2.4022 | 7.3    | 0.1169 | 1.7452 |
| 4/20/2019 23:16 | 0.5    | 0.4     | 4.4355 | -0.3167 | 2.3928 | 7.3    | 0.1231 | 1.7471 |
| 4/20/2019 23:17 | 0.5    | -0.4167 | 4.251  | -0.075  | 2.3778 | 7.3    | 0.1305 | 1.7451 |

|                 |        |         |        |         |        |        |        |        |
|-----------------|--------|---------|--------|---------|--------|--------|--------|--------|
| 4/20/2019 23:18 | 0.5    | -0.4167 | 4.3983 | -0.1667 | 2.3909 | 7.3    | 0.1173 | 1.7207 |
| 4/20/2019 23:19 | 0.5    | -0.35   | 4.411  | 0.1583  | 2.3853 | 7.3    | 0.1284 | 1.7327 |
| 4/20/2019 23:20 | 0.5    | -0.1833 | 4.2658 | -0.5167 | 2.3748 | 7.3    | 0.1196 | 1.7292 |
| 4/20/2019 23:21 | 0.5    | -0.3    | 4.2198 | 0.0167  | 2.381  | 7.3    | 0.121  | 1.7353 |
| 4/20/2019 23:22 | 0.5583 | -0.5667 | 4.2855 | -0.6333 | 2.3723 | 7.3    | 0.1307 | 1.7388 |
| 4/20/2019 23:23 | 0.6    | 0.5833  | 4.2732 | -0.4417 | 2.3746 | 7.3    | 0.1107 | 1.7506 |
| 4/20/2019 23:24 | 0.6    | -0.0333 | 4.4993 | -0.375  | 2.3684 | 7.2333 | 0.1263 | 1.7612 |
| 4/20/2019 23:25 | 0.5417 | -0.5667 | 4.5172 | -0.6833 | 2.3604 | 7.2    | 0.128  | 1.7671 |
| 4/20/2019 23:26 | 0.5    | 0.35    | 4.3505 | -0.05   | 2.3522 | 7.2    | 0.1203 | 1.7216 |
| 4/20/2019 23:27 | 0.5667 | -0.95   | 4.4713 | -0.2417 | 2.3523 | 7.1364 | 0.1285 | 1.7112 |
| 4/20/2019 23:28 | 0.6    | -0.55   | 4.8537 | 0.2167  | 2.3569 | 7.1818 | 0.1189 | 1.7223 |
| 4/20/2019 23:29 | 0.5833 | -0.0667 | 4.5145 | -0.175  | 2.3355 | 7.19   | 0.1157 | 1.7353 |
| 4/20/2019 23:30 | 0.5    | -0.6833 | 4.4635 | -0.5167 | 2.3447 | 7.1    | 0.1287 | 1.7261 |
| 4/20/2019 23:31 | 0.575  | -0.8667 | 4.5795 | -0.1667 | 2.3348 | 7.1    | 0.1198 | 1.7386 |
| 4/20/2019 23:32 | 0.6083 | -0.7667 | 4.271  | -0.3667 | 2.3394 | 7.1    | 0.1216 | 1.763  |
| 4/20/2019 23:33 | 0.7    | -0.1167 | 4.319  | -0.8917 | 2.3346 | 7.1    | 0.1179 | 1.7493 |
| 4/20/2019 23:34 | 0.7    | 0.3833  | 4.396  | -0.2167 | 2.3232 | 7.1    | 0.1339 | 1.7543 |
| 4/20/2019 23:35 | 0.7    | -0.45   | 4.3988 | -0.3917 | 2.336  | 7.1    | 0.1293 | 1.7525 |
| 4/20/2019 23:36 | 0.7    | -0.1667 | 4.1857 | -0.4333 | 2.3201 | 7.1    | 0.117  | 1.7276 |
| 4/20/2019 23:37 | 0.7667 | -0.3833 | 4.442  | -0.5167 | 2.322  | 7.1    | 0.1304 | 1.7477 |
| 4/20/2019 23:38 | 0.8    | 0.25    | 4.4178 | 0.1417  | 2.2903 | 7.1    | 0.1171 | 1.741  |
| 4/20/2019 23:39 | 0.8    | 0       | 4.5522 | -0.6333 | 2.29   | 7.125  | 0.119  | 1.7467 |
| 4/20/2019 23:40 | 0.725  | -0.8167 | 4.4813 | -0.725  | 2.277  | 7.1    | 0.1314 | 1.7948 |
| 4/20/2019 23:41 | 0.7    | 0.05    | 4.3323 | -0.4667 | 2.2608 | 7.1    | 0.1105 | 1.8058 |
| 4/20/2019 23:42 | 0.7    | -1.05   | 4.5738 | -0.4167 | 2.2733 | 7.1    | 0.1291 | 1.7837 |
| 4/20/2019 23:43 | 0.7    | -0.35   | 4.3025 | -1.0167 | 2.2808 | 7.1    | 0.1199 | 1.7604 |
| 4/20/2019 23:44 | 0.7    | -0.1333 | 4.4935 | -0.05   | 2.2571 | 7.1091 | 0.1238 | 1.7459 |
| 4/20/2019 23:45 | 0.7417 | -0.8    | 4.6262 | -0.3    | 2.2421 | 7.2    | 0.1265 | 1.7823 |
| 4/20/2019 23:46 | 0.7417 | -0.2333 | 4.694  | -0.775  | 2.2677 | 7.2    | 0.1124 | 1.8104 |
| 4/20/2019 23:47 | 0.8    | 0.2333  | 4.5512 | -0.1917 | 2.2417 | 7.2    | 0.1293 | 1.7827 |
| 4/20/2019 23:48 | 0.8    | -0.15   | 4.4237 | -0.2    | 2.2523 | 7.2    | 0.12   | 1.7727 |
| 4/20/2019 23:49 | 0.8    | 0.0167  | 4.0203 | -0.3583 | 2.2513 | 7.2    | 0.1187 | 1.7628 |
| 4/20/2019 23:50 | 0.7583 | 0.2333  | 4.1603 | -0.175  | 2.2478 | 7.2    | 0.1228 | 1.7621 |
| 4/20/2019 23:51 | 0.7    | -0.3333 | 4.1332 | -0.0917 | 2.2344 | 7.2    | 0.115  | 1.7743 |
| 4/20/2019 23:52 | 0.65   | 0.0833  | 4.5882 | -0.5167 | 2.2308 | 7.2    | 0.1261 | 1.781  |
| 4/20/2019 23:53 | 0.6    | -0.3167 | 4.4963 | -0.3917 | 2.2436 | 7.15   | 0.1185 | 1.8003 |
| 4/20/2019 23:54 | 0.625  | -0.4667 | 4.6002 | -0.6833 | 2.2303 | 7.2    | 0.1257 | 1.8205 |
| 4/20/2019 23:55 | 0.7    | -0.7333 | 4.245  | -0.5417 | 2.2369 | 7.2    | 0.1226 | 1.7664 |
| 4/20/2019 23:56 | 0.6583 | -0.45   | 4.5082 | 0.425   | 2.2186 | 7.1583 | 0.1188 | 1.7457 |
| 4/20/2019 23:57 | 0.6    | -0.0167 | 4.3877 | -0.375  | 2.2224 | 7.1    | 0.1348 | 1.7568 |
| 4/20/2019 23:58 | 0.6    | -0.6167 | 4.4813 | -0.9167 | 2.2358 | 7.1    | 0.1238 | 1.7395 |
| 4/20/2019 23:59 | 0.65   | -0.45   | 4.2627 | -0.3083 | 2.2251 | 7.1    | 0.1191 | 1.7711 |
| 4/21/2019 0:00  | 0.6583 | -0.2167 | 4.5007 | -0.85   | 2.2179 | 7.1    | 0.1266 | 1.7548 |
| 4/21/2019 0:01  | 0.6    | 0.4167  | 4.5278 | -0.1833 | 2.2056 | 7.125  | 0.113  | 1.7426 |
| 4/21/2019 0:02  | 0.55   | -0.5333 | 4.375  | -0.175  | 2.2055 | 7.1909 | 0.1225 | 1.7632 |
| 4/21/2019 0:03  | 0.5    | -0.3833 | 4.2343 | -0.4167 | 2.1962 | 7.1    | 0.1209 | 1.7824 |
| 4/21/2019 0:04  | 0.5    | 0.0833  | 4.6253 | 0.3667  | 2.1911 | 7.1    | 0.1177 | 1.776  |

|                |        |         |        |         |        |        |        |        |
|----------------|--------|---------|--------|---------|--------|--------|--------|--------|
| 4/21/2019 0:05 | 0.5    | 0.05    | 4.563  | -0.475  | 2.1849 | 7.1083 | 0.131  | 1.7758 |
| 4/21/2019 0:06 | 0.5    | -0.2333 | 4.5615 | -0.8333 | 2.1771 | 7.2    | 0.1182 | 1.7868 |
| 4/21/2019 0:07 | 0.5    | -0.4667 | 4.4753 | 0       | 2.1858 | 7.2    | 0.1185 | 1.7671 |
| 4/21/2019 0:08 | 0.55   | -0.3167 | 4.3988 | -0.4    | 2.1872 | 7.2167 | 0.121  | 1.7711 |
| 4/21/2019 0:09 | 0.6    | -0.0167 | 4.5173 | -0.6083 | 2.1862 | 7.3    | 0.1132 | 1.7838 |
| 4/21/2019 0:10 | 0.6    | 0.1833  | 4.8308 | -0.4083 | 2.1713 | 7.3    | 0.125  | 1.7776 |
| 4/21/2019 0:11 | 0.6    | -0.2167 | 4.7802 | -0.675  | 2.1583 | 7.3    | 0.1124 | 1.7633 |
| 4/21/2019 0:12 | 0.6    | -0.75   | 4.46   | -0.4833 | 2.1747 | 7.3    | 0.1256 | 1.7652 |
| 4/21/2019 0:13 | 0.6    | -0.2833 | 4.3633 | -0.5167 | 2.1691 | 7.3    | 0.1199 | 1.7739 |
| 4/21/2019 0:14 | 0.6    | -0.3167 | 4.426  | -0.3333 | 2.1582 | 7.3    | 0.1125 | 1.7881 |
| 4/21/2019 0:15 | 0.6    | -0.1667 | 4.4257 | 0.0417  | 2.1694 | 7.3    | 0.127  | 1.7902 |
| 4/21/2019 0:16 | 0.6    | -0.2833 | 4.39   | 0.0417  | 2.179  | 7.3    | 0.1157 | 1.8149 |
| 4/21/2019 0:17 | 0.6    | -0.25   | 4.4313 | 0.0583  | 2.1623 | 7.3    | 0.1186 | 1.7794 |
| 4/21/2019 0:18 | 0.6    | -0.0667 | 4.8583 | -0.1167 | 2.1438 | 7.3    | 0.1266 | 1.7899 |
| 4/21/2019 0:19 | 0.6333 | -0.4833 | 4.8185 | 0.0333  | 2.1413 | 7.3    | 0.1062 | 1.7973 |
| 4/21/2019 0:20 | 0.7    | -0.35   | 4.6258 | 0.0667  | 2.1272 | 7.225  | 0.1213 | 1.7833 |
| 4/21/2019 0:21 | 0.7    | -0.4167 | 4.3793 | -0.1333 | 2.1168 | 7.2    | 0.1234 | 1.768  |
| 4/21/2019 0:22 | 0.7333 | -0.35   | 4.4297 | -1.0417 | 2.1089 | 7.2667 | 0.1178 | 1.772  |
| 4/21/2019 0:23 | 0.7    | -0.3167 | 4.6202 | -0.7417 | 2.1205 | 7.2091 | 0.1256 | 1.7868 |
| 4/21/2019 0:24 | 0.6833 | -0.5333 | 4.5062 | -0.925  | 2.1236 | 7.2    | 0.1075 | 1.8057 |
| 4/21/2019 0:25 | 0.6    | 0.25    | 4.2923 | -0.2833 | 2.1118 | 7.2    | 0.1279 | 1.8106 |
| 4/21/2019 0:26 | 0.5667 | -0.3833 | 4.589  | -0.2917 | 2.1254 | 7.2917 | 0.1205 | 1.8059 |
| 4/21/2019 0:27 | 0.5    | -0.4    | 4.668  | -0.3417 | 2.1067 | 7.3    | 0.1185 | 1.8007 |
| 4/21/2019 0:28 | 0.5667 | -0.45   | 4.8048 | -0.275  | 2.1123 | 7.3    | 0.1304 | 1.7646 |
| 4/21/2019 0:29 | 0.6167 | -0.3667 | 4.329  | -0.5    | 2.1121 | 7.3    | 0.1163 | 1.8022 |
| 4/21/2019 0:30 | 0.7    | -0.6667 | 4.6052 | -0.3583 | 2.0939 | 7.3    | 0.1308 | 1.7856 |
| 4/21/2019 0:31 | 0.7    | -0.25   | 4.5757 | -0.7167 | 2.1057 | 7.3    | 0.1253 | 1.7707 |
| 4/21/2019 0:32 | 0.7    | -0.1167 | 4.6155 | -0.575  | 2.0839 | 7.3    | 0.1148 | 1.7709 |
| 4/21/2019 0:33 | 0.6417 | -0.85   | 4.8105 | -0.7333 | 2.1127 | 7.3667 | 0.13   | 1.7636 |
| 4/21/2019 0:34 | 0.6    | -0.85   | 4.7304 | -0.05   | 2.0803 | 7.4    | 0.1061 | 1.758  |
| 4/21/2019 0:35 | 0.5583 | -0.6667 | 4.6461 | -0.6417 | 2.1088 | 7.4    | 0.117  | 1.7573 |
| 4/21/2019 0:36 | 0.5    | -0.7333 | 4.683  | -0.05   | 2.101  | 7.4    | 0.1277 | 1.8028 |
| 4/21/2019 0:37 | 0.5    | -0.1167 | 4.6288 | -0.5833 | 2.0853 | 7.4    | 0.1135 | 1.7991 |
| 4/21/2019 0:38 | 0.5917 | -0.6    | 4.5518 | -0.4083 | 2.0979 | 7.4    | 0.1297 | 1.7824 |
| 4/21/2019 0:39 | 0.6    | 0.15    | 4.5594 | -0.3833 | 2.1064 | 7.4    | 0.1125 | 1.8004 |
| 4/21/2019 0:40 | 0.6    | -0.25   | 4.6688 | -0.7917 | 2.109  | 7.4    | 0.1231 | 1.8148 |
| 4/21/2019 0:41 | 0.6    | 0.2     | 4.8693 | -0.0667 | 2.1053 | 7.45   | 0.1275 | 1.7762 |
| 4/21/2019 0:42 | 0.6583 | -0.15   | 4.6358 | -0.2583 | 2.0822 | 7.5    | 0.111  | 1.7865 |
| 4/21/2019 0:43 | 0.7333 | -0.4    | 4.6425 | -0.325  | 2.0885 | 7.5    | 0.123  | 1.8188 |
| 4/21/2019 0:44 | 0.8    | -0.4833 | 4.5033 | -0.2417 | 2.0925 | 7.5    | 0.1167 | 1.8277 |
| 4/21/2019 0:45 | 0.7917 | 0.5333  | 4.8241 | -0.025  | 2.0801 | 7.5    | 0.1117 | 1.8305 |
| 4/21/2019 0:46 | 0.7417 | -0.6    | 4.5049 | -0.5333 | 2.0727 | 7.5    | 0.1205 | 1.8014 |
| 4/21/2019 0:47 | 0.7083 | -0.3333 | 4.3591 | -0.5667 | 2.0739 | 7.5636 | 0.1146 | 1.8129 |
| 4/21/2019 0:48 | 0.7    | -0.45   | 4.3813 | -0.0083 | 2.0619 | 7.6    | 0.1241 | 1.8613 |
| 4/21/2019 0:49 | 0.7    | 0.0333  | 4.7051 | -0.1417 | 2.084  | 7.6    | 0.1162 | 1.8135 |
| 4/21/2019 0:50 | 0.7    | -0.0667 | 4.5496 | -0.6417 | 2.0632 | 7.6    | 0.1216 | 1.7857 |
| 4/21/2019 0:51 | 0.7583 | -0.1    | 4.5205 | -0.85   | 2.0644 | 7.6    | 0.1259 | 1.7735 |

|                |        |         |        |         |        |        |        |        |
|----------------|--------|---------|--------|---------|--------|--------|--------|--------|
| 4/21/2019 0:52 | 0.8    | 0.2333  | 4.4521 | -0.7667 | 2.0671 | 7.6    | 0.11   | 1.7863 |
| 4/21/2019 0:53 | 0.8    | 0.3     | 4.8563 | 0.1833  | 2.0581 | 7.6    | 0.1324 | 1.822  |
| 4/21/2019 0:54 | 0.8    | -0.5833 | 4.4743 | -0.825  | 2.0628 | 7.6    | 0.1175 | 1.8174 |
| 4/21/2019 0:55 | 0.8    | -0.45   | 4.6091 | -1.025  | 2.0609 | 7.5333 | 0.1149 | 1.8008 |
| 4/21/2019 0:56 | 0.8    | -0.6833 | 4.7117 | -0.325  | 2.062  | 7.5    | 0.1183 | 1.8092 |
| 4/21/2019 0:57 | 0.8    | -0.3    | 4.7214 | -0.6583 | 2.0576 | 7.5    | 0.1106 | 1.8391 |
| 4/21/2019 0:58 | 0.8    | -0.9333 | 4.5498 | -0.1333 | 2.0517 | 7.5    | 0.1271 | 1.8125 |
| 4/21/2019 0:59 | 0.8    | -0.2833 | 4.422  | -0.5333 | 2.0559 | 7.5    | 0.1117 | 1.7852 |
| 4/21/2019 1:00 | 0.8    | -0.3333 | 4.7758 | -0.075  | 2.064  | 7.5083 | 0.1167 | 1.7983 |
| 4/21/2019 1:01 | 0.8    | -0.75   | 4.7721 | -0.5917 | 2.0675 | 7.5636 | 0.1324 | 1.8313 |
| 4/21/2019 1:02 | 0.8    | 0.25    | 4.6767 | -0.5167 | 2.0549 | 7.5    | 0.1117 | 1.841  |
| 4/21/2019 1:03 | 0.7417 | -0.4667 | 4.5428 | -0.6333 | 2.0628 | 7.5    | 0.1267 | 1.8293 |
| 4/21/2019 1:04 | 0.7833 | -0.3667 | 4.6671 | -0.0583 | 2.0482 | 7.5    | 0.1195 | 1.8406 |
| 4/21/2019 1:05 | 0.775  | -0.2333 | 4.6033 | -0.425  | 2.0416 | 7.5167 | 0.1152 | 1.8208 |
| 4/21/2019 1:06 | 0.8    | 0.45    | 4.4247 | -0.625  | 2.0436 | 7.5091 | 0.1233 | 1.8121 |
| 4/21/2019 1:07 | 0.85   | 0.0833  | 4.212  | -0.5667 | 2.0353 | 7.5    | 0.1111 | 1.8218 |
| 4/21/2019 1:08 | 0.9    | -0.25   | 4.8194 | -0.925  | 2.0334 | 7.5    | 0.1267 | 1.8129 |
| 4/21/2019 1:09 | 0.8417 | -0.1833 | 4.328  | -0.6083 | 2.0433 | 7.5    | 0.1188 | 1.8324 |
| 4/21/2019 1:10 | 0.7917 | -0.7833 | 4.6506 | -0.35   | 2.0485 | 7.5    | 0.1124 | 1.8476 |
| 4/21/2019 1:11 | 0.7    | -0.1167 | 4.5648 | -0.6583 | 2.0478 | 7.5    | 0.1258 | 1.8163 |
| 4/21/2019 1:12 | 0.7    | -0.15   | 4.5321 | -0.675  | 2.0453 | 7.5    | 0.1118 | 1.8268 |
| 4/21/2019 1:13 | 0.7    | -0.15   | 4.7275 | -0.25   | 2.0536 | 7.4818 | 0.1148 | 1.8117 |
| 4/21/2019 1:14 | 0.675  | -0.45   | 4.5576 | 0.0417  | 2.034  | 7.4364 | 0.1219 | 1.8317 |
| 4/21/2019 1:15 | 0.7    | -0.2167 | 4.7598 | -0.5667 | 2.0443 | 7.4182 | 0.11   | 1.8357 |
| 4/21/2019 1:16 | 0.7167 | -0.3167 | 4.7708 | -0.0583 | 2.0303 | 7.5    | 0.1258 | 1.8663 |
| 4/21/2019 1:17 | 0.8    | -0.6167 | 4.4185 | -0.425  | 2.0419 | 7.5    | 0.1211 | 1.8588 |
| 4/21/2019 1:18 | 0.8    | -0.7167 | 4.4688 | -0.3667 | 2.0371 | 7.4417 | 0.1223 | 1.8223 |
| 4/21/2019 1:19 | 0.7333 | -0.15   | 4.5588 | -0.6333 | 2.0193 | 7.5    | 0.1244 | 1.8158 |
| 4/21/2019 1:20 | 0.7    | -0.15   | 4.9228 | -0.7333 | 2.0416 | 7.4455 | 0.1105 | 1.8369 |
| 4/21/2019 1:21 | 0.7    | -0.3    | 4.7454 | -0.275  | 2.0263 | 7.4    | 0.1221 | 1.8323 |
| 4/21/2019 1:22 | 0.65   | -0.4333 | 5.1413 | -0.5    | 2.0374 | 7.4    | 0.1182 | 1.8343 |
| 4/21/2019 1:23 | 0.675  | -0.4833 | 4.7065 | 0.0583  | 2.0308 | 7.4    | 0.1137 | 1.8599 |
| 4/21/2019 1:24 | 0.7    | -0.3667 | 4.4823 | -0.4083 | 2.028  | 7.4    | 0.1292 | 1.855  |
| 4/21/2019 1:25 | 0.7    | -0.55   | 4.6498 | -0.525  | 2.019  | 7.4    | 0.1104 | 1.8595 |
| 4/21/2019 1:26 | 0.7    | -0.3833 | 4.6715 | -0.4083 | 2.0223 | 7.4    | 0.1241 | 1.8535 |
| 4/21/2019 1:27 | 0.7    | -0.2    | 4.5472 | -0.4417 | 2.047  | 7.4    | 0.1189 | 1.8778 |
| 4/21/2019 1:28 | 0.7    | 0.6833  | 4.437  | -0.2667 | 2.0353 | 7.4    | 0.1228 | 1.8503 |
| 4/21/2019 1:29 | 0.7    | -1.3833 | 4.7473 | -0.3667 | 2.0419 | 7.4    | 0.1253 | 1.8593 |
| 4/21/2019 1:30 | 0.65   | -0.1833 | 4.6978 | -0.525  | 2.0414 | 7.4    | 0.109  | 1.8633 |
| 4/21/2019 1:31 | 0.6    | -0.2333 | 4.3736 | 0.3083  | 2.0411 | 7.4    | 0.1257 | 1.8747 |
| 4/21/2019 1:32 | 0.6    | -0.9833 | 4.7022 | 0.3583  | 2.0158 | 7.4    | 0.1184 | 1.8473 |
| 4/21/2019 1:33 | 0.5917 | -0.3333 | 4.511  | 0.0083  | 2.0182 | 7.4    | 0.1059 | 1.8481 |
| 4/21/2019 1:34 | 0.5    | -0.3167 | 4.459  | -0.4    | 2.0341 | 7.4    | 0.1273 | 1.847  |
| 4/21/2019 1:35 | 0.5    | -1.0333 | 4.5471 | -0.2917 | 2.0433 | 7.4    | 0.1145 | 1.8513 |
| 4/21/2019 1:36 | 0.5    | 0.3333  | 4.6703 | -0.475  | 2.0259 | 7.4    | 0.1271 | 1.8437 |
| 4/21/2019 1:37 | 0.5083 | -0.7667 | 4.3418 | -0.3417 | 2.0043 | 7.4    | 0.1176 | 1.8444 |
| 4/21/2019 1:38 | 0.6    | -0.5333 | 4.2135 | -0.275  | 2.0316 | 7.4    | 0.1142 | 1.8544 |

|                |        |         |        |         |        |        |        |        |
|----------------|--------|---------|--------|---------|--------|--------|--------|--------|
| 4/21/2019 1:39 | 0.55   | -0.2167 | 4.6923 | -0.2583 | 2.0145 | 7.4    | 0.1303 | 1.843  |
| 4/21/2019 1:40 | 0.5    | -0.55   | 4.5408 | -0.225  | 2.0114 | 7.4    | 0.1105 | 1.8691 |
| 4/21/2019 1:41 | 0.5    | -0.35   | 4.9441 | -0.85   | 2.017  | 7.4    | 0.1226 | 1.8641 |
| 4/21/2019 1:42 | 0.575  | -0.6    | 4.6507 | -0.6    | 2.0206 | 7.4    | 0.1208 | 1.8548 |
| 4/21/2019 1:43 | 0.6    | 0.4167  | 4.5278 | -0.0417 | 2.0308 | 7.45   | 0.1158 | 1.8777 |
| 4/21/2019 1:44 | 0.625  | -0.55   | 4.6114 | -0.9083 | 2.0168 | 7.4    | 0.1245 | 1.8525 |
| 4/21/2019 1:45 | 0.65   | -0.1333 | 4.4787 | -0.8167 | 2.0345 | 7.5    | 0.1156 | 1.8668 |
| 4/21/2019 1:46 | 0.6    | -0.0833 | 4.5892 | -0.8333 | 2.0378 | 7.5    | 0.1264 | 1.8663 |
| 4/21/2019 1:47 | 0.6583 | 0.5667  | 4.4774 | -0.55   | 2.0299 | 7.5    | 0.1194 | 1.8948 |
| 4/21/2019 1:48 | 0.675  | -0.8    | 4.4594 | -0.1833 | 2.0584 | 7.5    | 0.1133 | 1.9028 |
| 4/21/2019 1:49 | 0.6167 | -0.3333 | 4.7746 | -0.2    | 2.0413 | 7.59   | 0.1298 | 1.9003 |
| 4/21/2019 1:50 | 0.6    | -0.4833 | 4.5236 | -0.1583 | 2.0539 | 7.6    | 0.1133 | 1.8924 |
| 4/21/2019 1:51 | 0.6    | -0.4167 | 4.6133 | -0.3417 | 2.0338 | 7.6    | 0.1271 | 1.8781 |
| 4/21/2019 1:52 | 0.6    | -0.6    | 4.5941 | -0.3917 | 2.0338 | 7.6667 | 0.127  | 1.8827 |
| 4/21/2019 1:53 | 0.6    | -0.2833 | 4.79   | -0.2    | 2.0524 | 7.6182 | 0.1126 | 1.8882 |
| 4/21/2019 1:54 | 0.6    | -0.3667 | 4.7403 | 0.1917  | 2.0323 | 7.6    | 0.1253 | 1.8928 |
| 4/21/2019 1:55 | 0.6    | 0.15    | 4.7746 | -0.1333 | 2.0501 | 7.6    | 0.1104 | 1.8943 |
| 4/21/2019 1:56 | 0.6    | -0.4333 | 4.4798 | -0.5917 | 2.0682 | 7.6    | 0.1206 | 1.883  |
| 4/21/2019 1:57 | 0.6    | -0.0833 | 4.626  | -0.275  | 2.0558 | 7.6    | 0.125  | 1.9103 |
| 4/21/2019 1:58 | 0.5455 | 0.05    | 4.7268 | -0.4167 | 2.0583 | 7.6    | 0.1139 | 1.8817 |
| 4/21/2019 1:59 | 0.5833 | -0.9333 | 4.8595 | -0.8833 | 2.0473 | 7.6    | 0.1223 | 1.8937 |
| 4/21/2019 2:00 | 0.525  | -0.4    | 4.7469 | -0.5667 | 2.0843 | 7.6273 | 0.121  | 1.8873 |
| 4/21/2019 2:01 | 0.5    | -0.5833 | 4.5969 | -0.025  | 2.074  | 7.7    | 0.1214 | 1.8749 |
| 4/21/2019 2:02 | 0.525  | -0.0833 | 4.6159 | -0.15   | 2.0833 | 7.7    | 0.1222 | 1.9098 |
| 4/21/2019 2:03 | 0.575  | -0.7333 | 4.6822 | -0.3167 | 2.0558 | 7.7    | 0.1083 | 1.9063 |
| 4/21/2019 2:04 | 0.6    | -0.05   | 4.9742 | -0.675  | 2.0552 | 7.7    | 0.1303 | 1.9041 |
| 4/21/2019 2:05 | 0.525  | 0.3     | 4.8945 | -0.5083 | 2.0413 | 7.7    | 0.1128 | 1.9084 |
| 4/21/2019 2:06 | 0.5    | -0.3667 | 4.7973 | -0.7167 | 2.041  | 7.7    | 0.1253 | 1.9178 |
| 4/21/2019 2:07 | 0.5    | -1.05   | 4.8785 | -0.9    | 2.0498 | 7.7    | 0.1207 | 1.8894 |
| 4/21/2019 2:08 | 0.5417 | -0.4833 | 4.6097 | -0.5417 | 2.0601 | 7.7    | 0.1144 | 1.8993 |
| 4/21/2019 2:09 | 0.6    | 0.0333  | 4.586  | -0.325  | 2.0643 | 7.7    | 0.1238 | 1.8913 |
| 4/21/2019 2:10 | 0.5917 | -0.6833 | 4.6468 | -0.9083 | 2.049  | 7.7    | 0.1131 | 1.9185 |
| 4/21/2019 2:11 | 0.5917 | -0.8833 | 4.6842 | -0.8    | 2.0731 | 7.7    | 0.1246 | 1.925  |
| 4/21/2019 2:12 | 0.5833 | -0.5    | 4.7692 | -0.2667 | 2.0493 | 7.75   | 0.122  | 1.9361 |
| 4/21/2019 2:13 | 0.6    | -0.1833 | 4.6992 | -0.6    | 2.0493 | 7.7455 | 0.111  | 1.9163 |
| 4/21/2019 2:14 | 0.6    | -1.0833 | 4.502  | -0.7167 | 2.0532 | 7.7    | 0.1249 | 1.8792 |
| 4/21/2019 2:15 | 0.6    | -0.25   | 4.4548 | -0.4917 | 2.0665 | 7.7    | 0.1103 | 1.875  |
| 4/21/2019 2:16 | 0.65   | 0.2333  | 4.4943 | -0.475  | 2.0954 | 7.7    | 0.1169 | 1.8911 |
| 4/21/2019 2:17 | 0.6917 | -0.1667 | 4.6132 | -0.4417 | 2.0712 | 7.7    | 0.1283 | 1.896  |
| 4/21/2019 2:18 | 0.7    | -1.2333 | 4.9483 | -0.2    | 2.0554 | 7.7    | 0.1057 | 1.9263 |
| 4/21/2019 2:19 | 0.7    | -0.0167 | 4.5787 | -0.1417 | 2.0483 | 7.7    | 0.1206 | 1.9049 |
| 4/21/2019 2:20 | 0.6583 | 0.3333  | 4.6367 | -0.225  | 2.0896 | 7.7    | 0.1279 | 1.8838 |
| 4/21/2019 2:21 | 0.6333 | -0.4833 | 4.9033 | -0.75   | 2.0669 | 7.7    | 0.1105 | 1.9232 |
| 4/21/2019 2:22 | 0.7    | -0.65   | 4.643  | -0.7917 | 2.0853 | 7.675  | 0.1285 | 1.9298 |
| 4/21/2019 2:23 | 0.7    | -0.05   | 4.54   | -0.4917 | 2.0631 | 7.6    | 0.1081 | 1.9642 |
| 4/21/2019 2:24 | 0.6667 | -0.4833 | 4.8533 | -0.4333 | 2.0836 | 7.6    | 0.124  | 1.9633 |
| 4/21/2019 2:25 | 0.6    | -0.2    | 4.6907 | -0.6    | 2.0708 | 7.5091 | 0.1195 | 1.9598 |

|                |        |         |        |         |        |        |        |        |
|----------------|--------|---------|--------|---------|--------|--------|--------|--------|
| 4/21/2019 2:26 | 0.5917 | -0.4167 | 4.8833 | -0.425  | 2.0704 | 7.5    | 0.1149 | 1.9677 |
| 4/21/2019 2:27 | 0.5167 | -0.4    | 4.549  | -0.0417 | 2.0855 | 7.5    | 0.1172 | 1.9436 |
| 4/21/2019 2:28 | 0.6    | -0.4167 | 4.7063 | -0.2    | 2.0903 | 7.5    | 0.1131 | 1.9603 |
| 4/21/2019 2:29 | 0.6    | -0.6167 | 4.5837 | -0.125  | 2.0956 | 7.5    | 0.1253 | 1.9383 |
| 4/21/2019 2:30 | 0.6    | -0.95   | 4.5337 | -0.2083 | 2.0949 | 7.6    | 0.1226 | 1.9428 |
| 4/21/2019 2:31 | 0.6    | -0.6167 | 4.3527 | -0.5083 | 2.0941 | 7.575  | 0.1182 | 1.9439 |
| 4/21/2019 2:32 | 0.6    | 0.0833  | 4.574  | -0.4667 | 2.1058 | 7.5667 | 0.1282 | 1.936  |
| 4/21/2019 2:33 | 0.6167 | -0.3167 | 4.5058 | -0.4833 | 2.0947 | 7.6    | 0.1166 | 1.9378 |
| 4/21/2019 2:34 | 0.6917 | -0.6667 | 4.687  | -0.2917 | 2.1003 | 7.6    | 0.1161 | 1.9362 |
| 4/21/2019 2:35 | 0.7    | -0.1833 | 4.7067 | -0.825  | 2.0923 | 7.6    | 0.1284 | 1.913  |
| 4/21/2019 2:36 | 0.7    | -0.1833 | 4.7725 | -0.0333 | 2.098  | 7.6    | 0.1054 | 1.9213 |
| 4/21/2019 2:37 | 0.7    | -0.3333 | 4.809  | -0.2667 | 2.0792 | 7.6    | 0.1338 | 1.9378 |
| 4/21/2019 2:38 | 0.7    | 0.1     | 4.3623 | -0.2333 | 2.0989 | 7.65   | 0.1116 | 1.9195 |
| 4/21/2019 2:39 | 0.7083 | 0.1     | 4.4332 | -0.5667 | 2.1066 | 7.6455 | 0.1193 | 1.9838 |
| 4/21/2019 2:40 | 0.8    | 0.05    | 4.4837 | -0.4167 | 2.0942 | 7.6583 | 0.1233 | 1.9771 |
| 4/21/2019 2:41 | 0.8    | 0.0833  | 4.6628 | -0.225  | 2.1103 | 7.6    | 0.1085 | 1.95   |
| 4/21/2019 2:42 | 0.8    | -0.2167 | 4.5455 | -0.675  | 2.111  | 7.6    | 0.1242 | 1.9462 |
| 4/21/2019 2:43 | 0.8    | -0.5667 | 4.6883 | -0.2417 | 2.1115 | 7.6    | 0.1136 | 1.9531 |
| 4/21/2019 2:44 | 0.8417 | -0.1333 | 4.6638 | -0.7083 | 2.1288 | 7.6    | 0.1274 | 1.9586 |
| 4/21/2019 2:45 | 0.8917 | -0.5167 | 4.7245 | 0.2583  | 2.0916 | 7.6    | 0.124  | 1.9633 |
| 4/21/2019 2:46 | 0.8083 | -0.2333 | 4.6087 | 0.1333  | 2.1137 | 7.6    | 0.1102 | 1.9505 |
| 4/21/2019 2:47 | 0.8    | -0.45   | 4.7872 | -0.75   | 2.1109 | 7.6    | 0.1215 | 1.9311 |
| 4/21/2019 2:48 | 0.8    | 0.3333  | 4.7337 | 0.0333  | 2.1049 | 7.5091 | 0.1242 | 1.9353 |
| 4/21/2019 2:49 | 0.775  | 0       | 4.3953 | 0.0917  | 2.1143 | 7.5727 | 0.1188 | 1.9358 |
| 4/21/2019 2:50 | 0.7417 | -0.5333 | 4.4765 | -0.1167 | 2.1225 | 7.6    | 0.129  | 1.9856 |
| 4/21/2019 2:51 | 0.7583 | -0.4333 | 4.584  | -0.075  | 2.1156 | 7.6    | 0.1123 | 1.9684 |
| 4/21/2019 2:52 | 0.7583 | -0.8333 | 4.7787 | -0.4    | 2.0927 | 7.6    | 0.1203 | 1.9803 |
| 4/21/2019 2:53 | 0.7    | -0.3833 | 4.575  | -0.6917 | 2.119  | 7.6    | 0.1239 | 1.9718 |
| 4/21/2019 2:54 | 0.7    | -0.5333 | 4.4477 | -0.425  | 2.1459 | 7.6    | 0.1108 | 1.9907 |
| 4/21/2019 2:55 | 0.7    | -0.8    | 4.5807 | -0.5167 | 2.1441 | 7.6    | 0.1285 | 1.9901 |
| 4/21/2019 2:56 | 0.7    | 0.0833  | 4.881  | -0.5417 | 2.1451 | 7.6    | 0.1092 | 1.995  |
| 4/21/2019 2:57 | 0.7    | 0.7     | 4.6863 | -0.1333 | 2.1343 | 7.6    | 0.1265 | 1.9623 |
| 4/21/2019 2:58 | 0.7    | -0.35   | 4.7475 | -1.0167 | 2.1408 | 7.6    | 0.1225 | 1.933  |
| 4/21/2019 2:59 | 0.7    | -0.5    | 4.7708 | -0.3    | 2.1403 | 7.6    | 0.1232 | 1.9619 |
| 4/21/2019 3:00 | 0.7    | -0.4    | 4.6068 | -0.5    | 2.1418 | 7.6    | 0.1296 | 1.9333 |
| 4/21/2019 3:01 | 0.7    | -0.05   | 4.6423 | -0.2583 | 2.1269 | 7.6    | 0.1152 | 1.952  |
| 4/21/2019 3:02 | 0.7    | 0.05    | 4.6572 | -0.6833 | 2.1458 | 7.6545 | 0.124  | 1.9628 |
| 4/21/2019 3:03 | 0.7    | -0.3833 | 4.5588 | -0.3083 | 2.1503 | 7.6364 | 0.1193 | 1.9673 |
| 4/21/2019 3:04 | 0.7    | 0.0833  | 4.636  | -0.15   | 2.1547 | 7.6    | 0.1143 | 1.9625 |
| 4/21/2019 3:05 | 0.6917 | 0.0333  | 4.4308 | -0.6167 | 2.1732 | 7.6    | 0.1231 | 1.9511 |
| 4/21/2019 3:06 | 0.65   | -0.0833 | 4.6893 | -0.2917 | 2.1242 | 7.6    | 0.1168 | 1.9565 |
| 4/21/2019 3:07 | 0.6    | -0.3833 | 4.7553 | 0.4167  | 2.1364 | 7.6    | 0.1239 | 1.9643 |
| 4/21/2019 3:08 | 0.6    | -0.2333 | 4.504  | -0.6833 | 2.1802 | 7.6    | 0.1135 | 1.9488 |
| 4/21/2019 3:09 | 0.6917 | -0.1667 | 4.7145 | -0.2583 | 2.1528 | 7.6    | 0.1165 | 1.9916 |
| 4/21/2019 3:10 | 0.7    | -0.2333 | 4.499  | 0.1667  | 2.1375 | 7.6    | 0.1243 | 1.9771 |
| 4/21/2019 3:11 | 0.7167 | 0.2167  | 4.4563 | 0       | 2.1524 | 7.6    | 0.1128 | 1.9823 |
| 4/21/2019 3:12 | 0.7    | -0.15   | 4.5032 | -0.55   | 2.1563 | 7.6    | 0.1275 | 1.9862 |

|                |        |         |        |         |        |        |        |        |
|----------------|--------|---------|--------|---------|--------|--------|--------|--------|
| 4/21/2019 3:13 | 0.7    | 0.1     | 4.5027 | -0.625  | 2.1326 | 7.6    | 0.1118 | 2.0067 |
| 4/21/2019 3:14 | 0.7    | -0.1667 | 4.7183 | -0.275  | 2.1368 | 7.6    | 0.1222 | 2.0026 |
| 4/21/2019 3:15 | 0.7    | -0.0833 | 4.7217 | -0.2167 | 2.1503 | 7.6    | 0.1192 | 1.9883 |
| 4/21/2019 3:16 | 0.7    | -0.7333 | 4.4338 | -0.6667 | 2.1489 | 7.6    | 0.1131 | 1.9829 |
| 4/21/2019 3:17 | 0.7    | -0.1667 | 4.614  | -0.5667 | 2.1374 | 7.6    | 0.1226 | 1.9818 |
| 4/21/2019 3:18 | 0.7083 | -0.6167 | 4.4712 | -0.5333 | 2.1508 | 7.65   | 0.1185 | 2.0028 |
| 4/21/2019 3:19 | 0.7083 | -0.5667 | 4.8575 | -0.3833 | 2.1738 | 7.7    | 0.1177 | 1.9873 |
| 4/21/2019 3:20 | 0.7    | -0.3167 | 4.792  | -0.3    | 2.1393 | 7.7    | 0.1286 | 1.9671 |
| 4/21/2019 3:21 | 0.7    | -0.7    | 4.5585 | -0.2333 | 2.1415 | 7.7182 | 0.1116 | 1.9834 |
| 4/21/2019 3:22 | 0.7    | -0.0333 | 4.8177 | -0.7417 | 2.1281 | 7.7909 | 0.1188 | 1.9951 |
| 4/21/2019 3:23 | 0.7    | -0.9333 | 4.5757 | -0.3583 | 2.1462 | 7.7    | 0.1149 | 1.9867 |
| 4/21/2019 3:24 | 0.7    | -0.4833 | 4.812  | 0.125   | 2.1453 | 7.7    | 0.1121 | 2.012  |
| 4/21/2019 3:25 | 0.675  | -0.5167 | 4.5915 | -0.3667 | 2.1137 | 7.7    | 0.1298 | 2.0287 |
| 4/21/2019 3:26 | 0.7    | -0.0333 | 4.791  | -0.4    | 2.134  | 7.7    | 0.106  | 2.0287 |
| 4/21/2019 3:27 | 0.7    | -0.4333 | 4.7038 | -0.475  | 2.1405 | 7.7    | 0.1151 | 1.9713 |
| 4/21/2019 3:28 | 0.6417 | -0.5    | 4.5962 | -0.8417 | 2.1449 | 7.7    | 0.1287 | 1.9551 |
| 4/21/2019 3:29 | 0.6333 | -0.5167 | 4.3607 | -0.325  | 2.1245 | 7.7    | 0.1167 | 1.9584 |
| 4/21/2019 3:30 | 0.675  | -0.3833 | 4.4333 | -0.7667 | 2.1348 | 7.6182 | 0.1122 | 1.9667 |
| 4/21/2019 3:31 | 0.7417 | 0.1     | 4.5643 | -0.2417 | 2.1432 | 7.6    | 0.1161 | 2.0093 |
| 4/21/2019 3:32 | 0.8    | -0.3833 | 4.6112 | 0.1     | 2.1327 | 7.6    | 0.1126 | 2.0134 |
| 4/21/2019 3:33 | 0.75   | -0.5    | 4.6578 | 0.0667  | 2.1331 | 7.6    | 0.1195 | 2.0058 |
| 4/21/2019 3:34 | 0.7167 | 0.6333  | 4.439  | -0.6667 | 2.1158 | 7.5909 | 0.1095 | 1.978  |
| 4/21/2019 3:35 | 0.7    | -0.5333 | 4.5116 | -0.0083 | 2.1569 | 7.5    | 0.122  | 2.0038 |
| 4/21/2019 3:36 | 0.7    | -0.2833 | 4.7603 | -0.85   | 2.1229 | 7.5    | 0.1232 | 1.9734 |
| 4/21/2019 3:37 | 0.6667 | -0.0667 | 4.8106 | -0.4917 | 2.1389 | 7.5    | 0.1152 | 1.9757 |
| 4/21/2019 3:38 | 0.6    | -0.4667 | 4.7403 | -0.2667 | 2.1474 | 7.5    | 0.1309 | 1.9783 |
| 4/21/2019 3:39 | 0.6    | -0.2333 | 4.4311 | -1.1083 | 2.1443 | 7.575  | 0.1141 | 1.9851 |
| 4/21/2019 3:40 | 0.6    | -0.1167 | 4.687  | 0.275   | 2.1638 | 7.6    | 0.125  | 1.995  |
| 4/21/2019 3:41 | 0.5833 | 0.4167  | 4.7467 | -0.8917 | 2.1248 | 7.6    | 0.1191 | 1.9873 |
| 4/21/2019 3:42 | 0.5417 | -0.3167 | 4.5539 | -0.3833 | 2.1564 | 7.6    | 0.1134 | 2.0188 |
| 4/21/2019 3:43 | 0.6    | -0.4167 | 4.6143 | 0.0667  | 2.16   | 7.6    | 0.12   | 1.997  |
| 4/21/2019 3:44 | 0.6167 | -0.6167 | 4.6283 | -0.4333 | 2.1608 | 7.5818 | 0.1078 | 2.0078 |
| 4/21/2019 3:45 | 0.7    | -0.25   | 4.698  | -0.425  | 2.1693 | 7.525  | 0.1227 | 1.99   |
| 4/21/2019 3:46 | 0.6083 | 0.0667  | 4.9607 | -0.4833 | 2.1833 | 7.6    | 0.1205 | 1.9989 |
| 4/21/2019 3:47 | 0.6    | -0.2833 | 4.6463 | -0.7083 | 2.1627 | 7.6273 | 0.1094 | 1.992  |
| 4/21/2019 3:48 | 0.6    | -0.2    | 4.7395 | -0.6917 | 2.1424 | 7.7    | 0.1251 | 2.0162 |
| 4/21/2019 3:49 | 0.5583 | -0.5167 | 4.5226 | -0.5833 | 2.1398 | 7.7    | 0.1118 | 2.0329 |
| 4/21/2019 3:50 | 0.5    | -0.2333 | 4.6643 | -0.1833 | 2.1451 | 7.7    | 0.1158 | 2.0508 |
| 4/21/2019 3:51 | 0.5    | 0.1     | 4.5628 | -0.1917 | 2.149  | 7.7    | 0.1193 | 2.0474 |
| 4/21/2019 3:52 | 0.5    | 0.4333  | 4.5003 | -0.25   | 2.1798 | 7.7    | 0.1035 | 2.0518 |
| 4/21/2019 3:53 | 0.5    | 0.3333  | 4.6737 | -0.0333 | 2.1384 | 7.7    | 0.1173 | 2.043  |
| 4/21/2019 3:54 | 0.4917 | -0.3333 | 4.364  | 0.0917  | 2.1482 | 7.7    | 0.1188 | 2.0542 |
| 4/21/2019 3:55 | 0.4917 | -0.4667 | 4.4951 | -0.7667 | 2.1372 | 7.7333 | 0.1082 | 2.0402 |
| 4/21/2019 3:56 | 0.4083 | -0.65   | 4.7293 | -0.6167 | 2.1652 | 7.8    | 0.1254 | 2.0013 |
| 4/21/2019 3:57 | 0.4917 | -0.4333 | 4.7299 | -0.5833 | 2.1607 | 7.8    | 0.1096 | 2.0102 |
| 4/21/2019 3:58 | 0.5    | 0       | 4.7483 | -0.325  | 2.1603 | 7.8    | 0.1319 | 2.0198 |
| 4/21/2019 3:59 | 0.5    | -0.0333 | 4.7272 | 0.1917  | 2.1478 | 7.8    | 0.1144 | 2.0262 |

|                |        |         |        |         |        |        |        |        |
|----------------|--------|---------|--------|---------|--------|--------|--------|--------|
| 4/21/2019 4:00 | 0.5    | -0.5833 | 4.7826 | 0.2833  | 2.1377 | 7.77   | 0.1121 | 2.0395 |
| 4/21/2019 4:01 | 0.5    | -1.0667 | 4.4776 | -0.1417 | 2.1288 | 7.8    | 0.1188 | 2.0446 |
| 4/21/2019 4:02 | 0.5083 | -0.6333 | 4.3975 | -0.325  | 2.1309 | 7.8    | 0.1024 | 2.0384 |
| 4/21/2019 4:03 | 0.5417 | 0.1     | 4.6542 | 0.1583  | 2.1563 | 7.8    | 0.1263 | 1.9986 |
| 4/21/2019 4:04 | 0.5917 | -0.2667 | 4.4004 | 0.0833  | 2.1573 | 7.8    | 0.1304 | 1.9848 |
| 4/21/2019 4:05 | 0.6    | -0.4667 | 4.705  | 0.1167  | 2.1345 | 7.725  | 0.1116 | 1.9993 |
| 4/21/2019 4:06 | 0.6    | -0.4167 | 4.4824 | -0.2417 | 2.1379 | 7.7    | 0.1236 | 2.0071 |
| 4/21/2019 4:07 | 0.6    | -0.4    | 4.493  | -0.65   | 2.1284 | 7.75   | 0.1098 | 2.0173 |
| 4/21/2019 4:08 | 0.6    | -0.4333 | 4.4672 | -0.8083 | 2.1447 | 7.7    | 0.1117 | 2.0297 |
| 4/21/2019 4:09 | 0.6    | -0.0833 | 4.6311 | -0.6667 | 2.1536 | 7.7    | 0.1187 | 2.0329 |
| 4/21/2019 4:10 | 0.65   | 0.4167  | 4.5137 | -1.1833 | 2.1488 | 7.7    | 0.1094 | 2.0149 |
| 4/21/2019 4:11 | 0.7    | -0.4333 | 4.6299 | -0.6083 | 2.1392 | 7.7    | 0.1198 | 2.0128 |
| 4/21/2019 4:12 | 0.7    | -0.4667 | 4.7908 | -0.3083 | 2.1503 | 7.7    | 0.1181 | 2.0053 |
| 4/21/2019 4:13 | 0.6417 | 0.05    | 4.3863 | -0.6    | 2.1441 | 7.7    | 0.1189 | 2.0011 |
| 4/21/2019 4:14 | 0.6    | 0.05    | 4.5657 | 0.1167  | 2.1286 | 7.7    | 0.12   | 2.0134 |
| 4/21/2019 4:15 | 0.6    | -1.1167 | 4.8406 | -0.225  | 2.1312 | 7.6    | 0.1003 | 2.0269 |
| 4/21/2019 4:16 | 0.6    | -0.4167 | 4.8358 | -0.3917 | 2.1293 | 7.6    | 0.1241 | 2.0502 |
| 4/21/2019 4:17 | 0.6667 | 0.3     | 4.8298 | -0.4833 | 2.1293 | 7.63   | 0.098  | 2.0714 |
| 4/21/2019 4:18 | 0.7167 | 0.25    | 4.5707 | -0.375  | 2.1137 | 7.625  | 0.1133 | 2.0829 |
| 4/21/2019 4:19 | 0.8    | -0.4833 | 4.5056 | -0.825  | 2.1358 | 7.7    | 0.1155 | 2.0544 |
| 4/21/2019 4:20 | 0.75   | -0.6667 | 4.4295 | -0.2333 | 2.1263 | 7.7    | 0.1073 | 2.0545 |
| 4/21/2019 4:21 | 0.7    | 0.0333  | 4.5808 | -0.4667 | 2.1214 | 7.7    | 0.1209 | 2.0443 |
| 4/21/2019 4:22 | 0.7    | -0.0667 | 4.5398 | -0.1917 | 2.1272 | 7.7    | 0.1106 | 2.0373 |
| 4/21/2019 4:23 | 0.7    | -0.2333 | 4.5515 | -0.0667 | 2.1253 | 7.7    | 0.1145 | 2.0268 |
| 4/21/2019 4:24 | 0.7    | -0.05   | 4.6895 | 0       | 2.1306 | 7.7    | 0.1211 | 2.0333 |
| 4/21/2019 4:25 | 0.7    | -0.1167 | 4.8674 | -0.6167 | 2.1351 | 7.725  | 0.1091 | 2.0248 |
| 4/21/2019 4:26 | 0.6417 | -0.6167 | 4.7485 | -0.2333 | 2.1343 | 7.8    | 0.1284 | 2.0405 |
| 4/21/2019 4:27 | 0.6    | -0.2167 | 4.6729 | -0.1833 | 2.1135 | 7.8    | 0.1089 | 2.0558 |
| 4/21/2019 4:28 | 0.6    | 0.05    | 4.5191 | -0.5167 | 2.1283 | 7.8    | 0.1165 | 2.0194 |
| 4/21/2019 4:29 | 0.6583 | -0.05   | 4.5705 | -0.75   | 2.1314 | 7.8    | 0.1149 | 2.0378 |
| 4/21/2019 4:30 | 0.7    | -0.8333 | 4.5596 | -0.25   | 2.1238 | 7.8    | 0.1072 | 2.0281 |
| 4/21/2019 4:31 | 0.7    | -0.2167 | 4.6642 | -0.4833 | 2.1213 | 7.8333 | 0.1223 | 2.0554 |
| 4/21/2019 4:32 | 0.7    | -0.0833 | 4.5432 | -0.15   | 2.1156 | 7.8833 | 0.1088 | 2.0637 |
| 4/21/2019 4:33 | 0.7    | -0.9333 | 4.3537 | -0.2833 | 2.1322 | 7.87   | 0.1167 | 2.0248 |
| 4/21/2019 4:34 | 0.6917 | -0.3    | 4.5158 | -0.625  | 2.1233 | 7.8455 | 0.1085 | 2.0217 |
| 4/21/2019 4:35 | 0.6417 | -0.2    | 4.761  | -0.5417 | 2.1191 | 7.9    | 0.1059 | 2.0388 |
| 4/21/2019 4:36 | 0.625  | 0.1833  | 4.7483 | -0.15   | 2.1258 | 7.8333 | 0.1217 | 2.0488 |
| 4/21/2019 4:37 | 0.6083 | -0.1167 | 4.7099 | -0.8667 | 2.1198 | 7.85   | 0.1009 | 2.0321 |
| 4/21/2019 4:38 | 0.6    | -0.35   | 4.6698 | 0.2     | 2.1245 | 7.9    | 0.1198 | 2.0363 |
| 4/21/2019 4:39 | 0.6    | 0.15    | 4.7013 | -0.3583 | 2.1176 | 7.9    | 0.119  | 2.0463 |
| 4/21/2019 4:40 | 0.6    | 0.3     | 4.601  | -0.6167 | 2.1151 | 7.9    | 0.1123 | 2.0459 |
| 4/21/2019 4:41 | 0.6    | -0.5667 | 4.6996 | -0.2917 | 2.128  | 7.9    | 0.1131 | 2.0337 |
| 4/21/2019 4:42 | 0.6    | -0.1667 | 4.6408 | -0.6    | 2.1263 | 7.9    | 0.1143 | 2.0332 |
| 4/21/2019 4:43 | 0.6    | -0.05   | 4.4919 | -0.4083 | 2.1189 | 7.8364 | 0.1131 | 2.0477 |
| 4/21/2019 4:44 | 0.6    | -0.35   | 4.5868 | -0.4083 | 2.104  | 7.8    | 0.1165 | 2.0257 |
| 4/21/2019 4:45 | 0.6    | -0.3833 | 4.4393 | -0.2083 | 2.104  | 7.8    | 0.1077 | 2.0618 |
| 4/21/2019 4:46 | 0.6    | -0.3667 | 4.7919 | -0.9917 | 2.0968 | 7.8    | 0.122  | 2.0752 |



|                |        |         |        |         |        |        |        |        |
|----------------|--------|---------|--------|---------|--------|--------|--------|--------|
| 4/21/2019 4:47 | 0.6    | -0.4    | 4.6876 | -0.5417 | 2.1112 | 7.8    | 0.1099 | 2.0731 |
| 4/21/2019 4:48 | 0.5583 | 0.65    | 4.5923 | -0.3833 | 2.0974 | 7.8    | 0.1176 | 2.0852 |
| 4/21/2019 4:49 | 0.6    | 0.0667  | 4.5451 | -0.1667 | 2.1148 | 7.8    | 0.1211 | 2.0641 |
| 4/21/2019 4:50 | 0.6    | -0.0333 | 4.8363 | -0.5583 | 2.1192 | 7.7091 | 0.1076 | 2.0353 |
| 4/21/2019 4:51 | 0.6917 | -0.2    | 4.5915 | -0.45   | 2.1071 | 7.7    | 0.1243 | 2.0046 |
| 4/21/2019 4:52 | 0.7    | -0.4667 | 4.4733 | -0.5167 | 2.1186 | 7.7    | 0.1096 | 2.0325 |
| 4/21/2019 4:53 | 0.65   | -0.1    | 4.5518 | 0.0833  | 2.1217 | 7.7    | 0.1154 | 2.0663 |
| 4/21/2019 4:54 | 0.6    | -0.3667 | 4.6974 | -0.5417 | 2.1063 | 7.7    | 0.1147 | 2.0668 |
| 4/21/2019 4:55 | 0.6    | -0.0167 | 4.454  | -0.2917 | 2.1112 | 7.7091 | 0.103  | 2.0826 |
| 4/21/2019 4:56 | 0.6    | -1.0833 | 4.6131 | -0.1083 | 2.1053 | 7.8    | 0.1182 | 2.0843 |
| 4/21/2019 4:57 | 0.6    | -0.8333 | 4.8008 | -0.075  | 2.1142 | 7.8    | 0.1071 | 2.0083 |
| 4/21/2019 4:58 | 0.6    | -0.4    | 4.5014 | -0.4417 | 2.1016 | 7.8    | 0.1077 | 2.0113 |
| 4/21/2019 4:59 | 0.6167 | 0.25    | 4.4214 | -0.5833 | 2.1047 | 7.8    | 0.1213 | 2.0258 |
| 4/21/2019 5:00 | 0.7    | -0.5333 | 4.4853 | -0.4417 | 2.0959 | 7.8    | 0.0942 | 2.0239 |
| 4/21/2019 5:01 | 0.7    | 0.4167  | 4.3648 | -0.1917 | 2.1185 | 7.8    | 0.1134 | 2.0358 |
| 4/21/2019 5:02 | 0.625  | -0.2833 | 4.3318 | -0.3083 | 2.1036 | 7.8    | 0.1114 | 2.0482 |
| 4/21/2019 5:03 | 0.6    | 0.2333  | 4.4593 | -0.3583 | 2.1215 | 7.8    | 0.1121 | 2.065  |
| 4/21/2019 5:04 | 0.6    | 0.1333  | 4.4303 | -0.2333 | 2.0996 | 7.8091 | 0.1172 | 2.0789 |
| 4/21/2019 5:05 | 0.6    | -0.55   | 4.5997 | -0.0917 | 2.1021 | 7.8833 | 0.0971 | 2.0585 |
| 4/21/2019 5:06 | 0.5667 | 0.3167  | 4.7417 | -0.4083 | 2.0939 | 7.8909 | 0.1162 | 2.0688 |
| 4/21/2019 5:07 | 0.5    | -0.2833 | 4.4442 | -0.4333 | 2.085  | 7.9    | 0.1122 | 2.0431 |
| 4/21/2019 5:08 | 0.5    | -0.3333 | 4.6768 | -0.5583 | 2.0933 | 7.9    | 0.1099 | 2.0591 |
| 4/21/2019 5:09 | 0.5    | -0.6    | 4.6493 | -0.4583 | 2.1102 | 7.8545 | 0.1162 | 2.1027 |
| 4/21/2019 5:10 | 0.5    | -0.2    | 4.5585 | -0.125  | 2.0945 | 7.9    | 0.1095 | 2.0823 |
| 4/21/2019 5:11 | 0.5    | -0.5    | 4.6592 | -0.25   | 2.0908 | 7.8364 | 0.118  | 2.0771 |
| 4/21/2019 5:12 | 0.5    | -0.2667 | 4.7782 | -0.7083 | 2.0863 | 7.8    | 0.1113 | 2.0736 |
| 4/21/2019 5:13 | 0.5    | -0.5    | 4.5537 | -0.35   | 2.0891 | 7.8    | 0.1042 | 2.0753 |
| 4/21/2019 5:14 | 0.5667 | -0.5    | 4.6647 | -0.2417 | 2.099  | 7.87   | 0.1198 | 2.062  |
| 4/21/2019 5:15 | 0.6    | -0.1167 | 4.4638 | -0.2667 | 2.1061 | 7.9    | 0.1045 | 2.0648 |
| 4/21/2019 5:16 | 0.6    | -0.0333 | 4.486  | -0.6    | 2.1067 | 7.81   | 0.1136 | 2.0701 |
| 4/21/2019 5:17 | 0.6    | -0.4167 | 4.7083 | -0.15   | 2.0783 | 7.8    | 0.104  | 2.0161 |
| 4/21/2019 5:18 | 0.6    | -0.2167 | 4.4673 | -0.25   | 2.0867 | 7.8    | 0.1066 | 2.0476 |
| 4/21/2019 5:19 | 0.6    | -0.2    | 4.7768 | -0.3083 | 2.0879 | 7.73   | 0.12   | 2.0828 |
| 4/21/2019 5:20 | 0.6    | 0.2833  | 4.6388 | -0.1833 | 2.0858 | 7.7    | 0.102  | 2.0895 |
| 4/21/2019 5:21 | 0.6    | -0.15   | 4.6023 | -0.1083 | 2.1067 | 7.7    | 0.1164 | 2.1234 |
| 4/21/2019 5:22 | 0.6417 | -0.7    | 4.4695 | -0.0333 | 2.0873 | 7.7    | 0.1074 | 2.0927 |
| 4/21/2019 5:23 | 0.7    | -0.5333 | 4.3418 | -0.55   | 2.1038 | 7.7    | 0.107  | 2.0688 |
| 4/21/2019 5:24 | 0.7    | 0       | 4.6015 | -0.6333 | 2.1102 | 7.65   | 0.1179 | 2.1109 |
| 4/21/2019 5:25 | 0.7    | -0.3    | 4.5242 | -0.475  | 2.087  | 7.6    | 0.1044 | 2.0898 |
| 4/21/2019 5:26 | 0.7    | 0.1833  | 4.7403 | -0.1917 | 2.0954 | 7.6    | 0.1071 | 2.0642 |
| 4/21/2019 5:27 | 0.7    | -0.1167 | 4.3947 | -0.875  | 2.0958 | 7.6    | 0.1058 | 2.0804 |
| 4/21/2019 5:28 | 0.6833 | -0.35   | 4.52   | 0.1333  | 2.0689 | 7.6    | 0.1054 | 2.0963 |
| 4/21/2019 5:29 | 0.7    | 0.7     | 4.5055 | -0.5333 | 2.066  | 7.6    | 0.1231 | 2.0874 |
| 4/21/2019 5:30 | 0.6333 | -0.25   | 4.6552 | 0.025   | 2.0803 | 7.6    | 0.1043 | 2.0671 |
| 4/21/2019 5:31 | 0.6    | -0.9333 | 4.3553 | -0.3917 | 2.0701 | 7.6    | 0.1065 | 2.0858 |
| 4/21/2019 5:32 | 0.575  | 0.15    | 4.2443 | -0.7333 | 2.0958 | 7.6    | 0.1045 | 2.0805 |
| 4/21/2019 5:33 | 0.5    | -0.4167 | 4.5363 | -0.0333 | 2.0727 | 7.6091 | 0.0999 | 2.066  |

|                |        |         |        |         |        |        |        |        |
|----------------|--------|---------|--------|---------|--------|--------|--------|--------|
| 4/21/2019 5:34 | 0.5    | -0.2833 | 4.4025 | -0.6333 | 2.1031 | 7.7    | 0.1144 | 2.0702 |
| 4/21/2019 5:35 | 0.5    | -0.0667 | 4.7258 | -0.25   | 2.0848 | 7.7    | 0.1053 | 2.0668 |
| 4/21/2019 5:36 | 0.5    | -0.5    | 4.5927 | -0.5833 | 2.111  | 7.7    | 0.1118 | 2.0762 |
| 4/21/2019 5:37 | 0.5    | -0.4333 | 4.4447 | -0.6083 | 2.0796 | 7.7909 | 0.0997 | 2.0682 |
| 4/21/2019 5:38 | 0.4    | 0.1     | 4.466  | -0.9583 | 2.0575 | 7.8    | 0.1064 | 2.0598 |
| 4/21/2019 5:39 | 0.4    | 0.1667  | 4.3393 | -0.4583 | 2.0824 | 7.8    | 0.1097 | 2.0857 |
| 4/21/2019 5:40 | 0.4    | -0.2167 | 4.3717 | -0.55   | 2.0959 | 7.8    | 0.1007 | 2.0813 |
| 4/21/2019 5:41 | 0.5    | -0.6833 | 4.4338 | -0.1917 | 2.0946 | 7.8    | 0.1118 | 2.0643 |
| 4/21/2019 5:42 | 0.5    | -0.3667 | 4.3232 | -0.3417 | 2.0891 | 7.8    | 0.1082 | 2.0873 |
| 4/21/2019 5:43 | 0.5    | -0.0333 | 4.375  | 0.1583  | 2.0897 | 7.8    | 0.1086 | 2.0853 |
| 4/21/2019 5:44 | 0.5    | -0.4    | 4.576  | -0.7083 | 2.0698 | 7.8    | 0.1189 | 2.0428 |
| 4/21/2019 5:45 | 0.5    | -0.6833 | 4.2837 | -0.15   | 2.078  | 7.8667 | 0.0985 | 2.0548 |
| 4/21/2019 5:46 | 0.4917 | -0.15   | 4.715  | -0.575  | 2.078  | 7.88   | 0.1131 | 2.0492 |
| 4/21/2019 5:47 | 0.475  | -0.2833 | 4.4243 | -0.45   | 2.0617 | 7.9    | 0.1114 | 2.055  |
| 4/21/2019 5:48 | 0.5    | -0.4167 | 4.2665 | -0.575  | 2.0564 | 7.8545 | 0.0972 | 2.0714 |
| 4/21/2019 5:49 | 0.5583 | -0.95   | 4.412  | -0.5833 | 2.0713 | 7.8    | 0.1197 | 2.0848 |
| 4/21/2019 5:50 | 0.6    | -0.3833 | 4.3927 | -0.4417 | 2.0467 | 7.8    | 0.1053 | 2.0777 |
| 4/21/2019 5:51 | 0.6    | -0.6333 | 4.635  | -0.55   | 2.0558 | 7.8    | 0.1095 | 2.0753 |
| 4/21/2019 5:52 | 0.6    | 0.0333  | 4.4922 | -0.2    | 2.0411 | 7.7583 | 0.1079 | 2.0773 |
| 4/21/2019 5:53 | 0.6    | -0.1167 | 4.3773 | -1.1    | 2.0688 | 7.7667 | 0.1092 | 2.0754 |
| 4/21/2019 5:54 | 0.6    | -0.2167 | 4.4428 | -0.1917 | 2.0838 | 7.7889 | 0.1167 | 2.0953 |
| 4/21/2019 5:55 | 0.6    | -0.8    | 4.5317 | -0.3333 | 2.0838 | 7.7222 | 0.0986 | 2.102  |
| 4/21/2019 5:56 | 0.6    | 0.1     | 4.3798 | -0.2583 | 2.064  | 7.8    | 0.1233 | 2.0759 |
| 4/21/2019 5:57 | 0.6    | -0.5333 | 4.4512 | -0.6333 | 2.0551 | 7.72   | 0.1064 | 2.0595 |
| 4/21/2019 5:58 | 0.5583 | -0.7    | 4.5033 | -0.7583 | 2.056  | 7.7    | 0.1029 | 2.0404 |
| 4/21/2019 5:59 | 0.5    | 0.0667  | 4.366  | -0.5    | 2.0554 | 7.7    | 0.1215 | 2.0796 |
| 4/21/2019 6:00 | 0.5    | 0.1667  | 4.423  | -0.85   | 2.0726 | 7.7    | 0.098  | 2.0793 |
| 4/21/2019 6:01 | 0.4917 | 0.2667  | 4.552  | -0.0833 | 2.0688 | 7.7667 | 0.1188 | 2.0707 |
| 4/21/2019 6:02 | 0.4917 | -0.3833 | 4.1798 | -0.2167 | 2.06   | 7.8    | 0.1069 | 2.0693 |
| 4/21/2019 6:03 | 0.5    | -0.65   | 4.3102 | -0.4    | 2.0639 | 7.8    | 0.1035 | 2.0658 |
| 4/21/2019 6:04 | 0.5    | -0.0833 | 4.3472 | -0.425  | 2.1003 | 7.9    | 0.1045 | 2.0901 |
| 4/21/2019 6:05 | 0.5    | -0.2833 | 4.2868 | -0.175  | 2.0688 | 7.9    | 0.0944 | 2.1057 |
| 4/21/2019 6:06 | 0.5    | -0.6    | 4.3447 | -0.275  | 2.0539 | 7.9    | 0.1175 | 2.1104 |
| 4/21/2019 6:07 | 0.5167 | -0.35   | 4.3172 | -0.45   | 2.0648 | 7.9727 | 0.0991 | 2.0804 |
| 4/21/2019 6:08 | 0.5667 | -0.05   | 4.1932 | -0.3333 | 2.0388 | 8      | 0.1147 | 2.1059 |
| 4/21/2019 6:09 | 0.5667 | -0.0833 | 4.5425 | -0.2583 | 2.0563 | 8      | 0.1069 | 2.0959 |
| 4/21/2019 6:10 | 0.5    | 0.65    | 4.2093 | -0.925  | 2.0561 | 8      | 0.0992 | 2.0972 |
| 4/21/2019 6:11 | 0.5    | -0.5833 | 4.2312 | -0.35   | 2.0359 | 8      | 0.1104 | 2.1173 |
| 4/21/2019 6:12 | 0.5    | -0.5333 | 4.5907 | -0.3167 | 2.0369 | 8      | 0.0985 | 2.0991 |
| 4/21/2019 6:13 | 0.5    | -0.2167 | 4.2945 | -0.1583 | 2.073  | 8      | 0.1125 | 2.0933 |
| 4/21/2019 6:14 | 0.5    | -0.8333 | 4.399  | -0.775  | 2.0466 | 8      | 0.108  | 2.104  |
| 4/21/2019 6:15 | 0.5    | 0.5     | 4.3328 | -0.65   | 2.0443 | 8      | 0.0935 | 2.1488 |
| 4/21/2019 6:16 | 0.5    | 0       | 4.577  | -0.0833 | 2.0607 | 8      | 0.1147 | 2.1508 |
| 4/21/2019 6:17 | 0.4333 | -0.7833 | 4.3335 | -0.6    | 2.0402 | 7.9182 | 0.1035 | 2.1297 |
| 4/21/2019 6:18 | 0.4    | -0.4333 | 4.3255 | -0.325  | 2.0645 | 7.9    | 0.1113 | 2.1334 |
| 4/21/2019 6:19 | 0.4    | 0.6833  | 4.4025 | -0.3917 | 2.0613 | 7.9    | 0.1114 | 2.1237 |
| 4/21/2019 6:20 | 0.4    | -0.3333 | 4.397  | -0.3333 | 2.0634 | 7.9    | 0.0992 | 2.1105 |

|                |        |         |        |         |        |        |        |        |
|----------------|--------|---------|--------|---------|--------|--------|--------|--------|
| 4/21/2019 6:21 | 0.4    | -0.5333 | 4.6068 | 0.175   | 2.0563 | 7.9    | 0.1109 | 2.0954 |
| 4/21/2019 6:22 | 0.4    | 0.1833  | 4.4577 | -0.3167 | 2.0546 | 7.9    | 0.1015 | 2.1118 |
| 4/21/2019 6:23 | 0.4    | -0.3167 | 4.4645 | 0       | 2.0638 | 7.9    | 0.104  | 2.1267 |
| 4/21/2019 6:24 | 0.3833 | -0.2333 | 4.5788 | -0.7583 | 2.0415 | 7.8    | 0.1119 | 2.1153 |
| 4/21/2019 6:25 | 0.4    | -0.1167 | 4.4447 | -0.8917 | 2.0493 | 7.8    | 0.1017 | 2.1152 |
| 4/21/2019 6:26 | 0.4    | -0.3333 | 4.6257 | -0.3167 | 2.0573 | 7.8    | 0.1128 | 2.1448 |
| 4/21/2019 6:27 | 0.4    | -0.1    | 4.6515 | -0.5583 | 2.0346 | 7.8    | 0.0938 | 2.1339 |
| 4/21/2019 6:28 | 0.4    | -0.05   | 4.3965 | -0.3    | 2.0518 | 7.8    | 0.1085 | 2.1293 |
| 4/21/2019 6:29 | 0.4091 | 0.3     | 4.7008 | -0.2    | 2.0462 | 7.78   | 0.1065 | 2.13   |
| 4/21/2019 6:30 | 0.4    | 0.0667  | 4.4463 | -0.325  | 2.0603 | 7.8    | 0.1069 | 2.1478 |
| 4/21/2019 6:31 | 0.4417 | -0.1833 | 4.485  | -0.775  | 2.0442 | 7.8    | 0.1122 | 2.1242 |
| 4/21/2019 6:32 | 0.4333 | -0.1    | 4.4203 | -0.075  | 2.0374 | 7.8    | 0.0933 | 2.1201 |
| 4/21/2019 6:33 | 0.4167 | 0.0167  | 4.3593 | -0.1083 | 2.0495 | 7.8    | 0.1163 | 2.1222 |
| 4/21/2019 6:34 | 0.4583 | 0.1667  | 4.4448 | -0.275  | 2.0377 | 7.8    | 0.0956 | 2.1148 |
| 4/21/2019 6:35 | 0.5    | -0.6667 | 4.3542 | -0.1417 | 2.0413 | 7.8    | 0.1112 | 2.1417 |
| 4/21/2019 6:36 | 0.5    | -1.1833 | 4.2712 | -0.2417 | 2.0362 | 7.8    | 0.1154 | 2.1493 |
| 4/21/2019 6:37 | 0.5083 | -0.8    | 4.5676 | -0.1333 | 2.0302 | 7.8364 | 0.1027 | 2.1518 |
| 4/21/2019 6:38 | 0.5    | 0.1833  | 4.2473 | -0.35   | 2.0268 | 7.8    | 0.1113 | 2.135  |
| 4/21/2019 6:39 | 0.525  | 0.0667  | 4.2436 | -0.5917 | 2.0306 | 7.8    | 0.1063 | 2.1417 |
| 4/21/2019 6:40 | 0.6    | 0.0667  | 4.2927 | -0.8917 | 2.0344 | 7.8182 | 0.1029 | 2.1493 |
| 4/21/2019 6:41 | 0.65   | -0.1    | 4.311  | -0.4333 | 2.0305 | 7.8636 | 0.1086 | 2.1461 |
| 4/21/2019 6:42 | 0.6167 | -0.2    | 4.5863 | -0.9167 | 2.0306 | 7.8    | 0.1044 | 2.1648 |
| 4/21/2019 6:43 | 0.6    | -1.3333 | 4.3763 | -0.4917 | 2.0173 | 7.7417 | 0.1119 | 2.1613 |
| 4/21/2019 6:44 | 0.6    | -1.0333 | 4.4391 | -0.1    | 2.0106 | 7.8    | 0.0909 | 2.1303 |
| 4/21/2019 6:45 | 0.6    | -0.25   | 4.5418 | -0.4417 | 2.0416 | 7.8    | 0.1041 | 2.1414 |
| 4/21/2019 6:46 | 0.6083 | -0.3667 | 4.5313 | -0.0833 | 2.0494 | 7.8    | 0.1142 | 2.1529 |
| 4/21/2019 6:47 | 0.6417 | -0.4833 | 4.5752 | -0.7    | 2.049  | 7.8    | 0.0985 | 2.1244 |
| 4/21/2019 6:48 | 0.6917 | -0.4167 | 4.5079 | -0.15   | 2.0357 | 7.8    | 0.1106 | 2.1578 |
| 4/21/2019 6:49 | 0.6833 | -0.6167 | 4.2163 | -0.4083 | 1.9874 | 7.8    | 0.0994 | 2.1948 |
| 4/21/2019 6:50 | 0.6917 | -0.5    | 4.1541 | -0.025  | 2.0049 | 7.8    | 0.1135 | 2.1828 |
| 4/21/2019 6:51 | 0.7    | -0.15   | 4.4368 | -0.325  | 2.0014 | 7.8    | 0.1001 | 2.1731 |
| 4/21/2019 6:52 | 0.7    | -0.9    | 4.367  | -0.225  | 1.9976 | 7.8    | 0.1027 | 2.1863 |
| 4/21/2019 6:53 | 0.7    | -0.0667 | 4.14   | -0.225  | 2.0067 | 7.8    | 0.1122 | 2.1801 |
| 4/21/2019 6:54 | 0.675  | -0.6    | 4.3783 | -0.425  | 2.0075 | 7.82   | 0.096  | 2.1593 |
| 4/21/2019 6:55 | 0.7    | -0.35   | 4.6178 | -0.0583 | 2.0015 | 7.9    | 0.1071 | 2.1412 |
| 4/21/2019 6:56 | 0.6333 | -0.5333 | 4.3323 | -0.7583 | 1.9994 | 7.8    | 0.107  | 2.1358 |
| 4/21/2019 6:57 | 0.6    | -0.25   | 4.4006 | -0.7917 | 1.9925 | 7.8    | 0.1016 | 2.1383 |
| 4/21/2019 6:58 | 0.6    | 0.2167  | 4.5065 | -0.4583 | 1.9864 | 7.8    | 0.119  | 2.1538 |
| 4/21/2019 6:59 | 0.6    | -0.05   | 4.3889 | -0.6833 | 1.9811 | 7.8    | 0.0998 | 2.1406 |
| 4/21/2019 7:00 | 0.6    | -0.55   | 4.5188 | -0.475  | 1.9988 | 7.8    | 0.1052 | 2.1474 |
| 4/21/2019 7:01 | 0.6    | -0.7333 | 4.4253 | -0.375  | 1.9906 | 7.8    | 0.118  | 2.1538 |
| 4/21/2019 7:02 | 0.6    | 0.3333  | 4.3199 | -0.6    | 1.9725 | 7.8    | 0.1016 | 2.1315 |
| 4/21/2019 7:03 | 0.6    | -0.2333 | 4.5091 | -0.2667 | 1.9889 | 7.8    | 0.1188 | 2.1532 |
| 4/21/2019 7:04 | 0.5333 | -0.3333 | 4.3357 | -0.0917 | 1.9873 | 7.8    | 0.1029 | 2.1755 |
| 4/21/2019 7:05 | 0.5    | -0.35   | 4.4358 | -0.3    | 1.976  | 7.8    | 0.1142 | 2.1812 |
| 4/21/2019 7:06 | 0.4833 | 0.0167  | 4.262  | -1.075  | 1.9893 | 7.8    | 0.0991 | 2.1956 |
| 4/21/2019 7:07 | 0.5    | -0.45   | 4.5722 | -0.8833 | 1.958  | 7.8    | 0.1002 | 2.1873 |

|                |        |         |        |         |        |        |        |        |
|----------------|--------|---------|--------|---------|--------|--------|--------|--------|
| 4/21/2019 7:08 | 0.5    | -0.3667 | 4.5339 | -1.225  | 1.9643 | 7.8182 | 0.1107 | 2.161  |
| 4/21/2019 7:09 | 0.5    | -0.6667 | 4.43   | -0.9    | 1.9563 | 7.85   | 0.1023 | 2.1385 |
| 4/21/2019 7:10 | 0.5    | -0.25   | 4.3643 | -0.6167 | 1.9489 | 7.9    | 0.1128 | 2.1543 |
| 4/21/2019 7:11 | 0.5    | -0.7333 | 4.2828 | -0.3417 | 1.9648 | 7.9    | 0.1099 | 2.1727 |
| 4/21/2019 7:12 | 0.55   | -0.1    | 4.1617 | -0.25   | 1.9627 | 7.9    | 0.0983 | 2.1605 |
| 4/21/2019 7:13 | 0.5167 | -0.5667 | 4.739  | -0.4167 | 1.9568 | 7.91   | 0.1123 | 2.1926 |
| 4/21/2019 7:14 | 0.5167 | 0.3167  | 4.2739 | -0.2    | 1.9608 | 7.9727 | 0.0988 | 2.1989 |
| 4/21/2019 7:15 | 0.5667 | 0       | 4.7867 | 0       | 1.9533 | 7.9636 | 0.1153 | 2.2169 |
| 4/21/2019 7:16 | 0.425  | -0.3333 | 4.0918 | -0.4    | 1.9575 | 8      | 0.1093 | 2.1766 |
| 4/21/2019 7:17 | 0.3667 | -0.1667 | 4.3303 | -0.1417 | 1.9653 | 8      | 0.1074 | 2.1678 |
| 4/21/2019 7:18 | 0.2833 | -0.2833 | 4.451  | -0.9917 | 1.9528 | 8      | 0.1175 | 2.1771 |
| 4/21/2019 7:19 | 0.3    | -0.9    | 4.3818 | -0.4583 | 1.9358 | 8      | 0.0968 | 2.2068 |
| 4/21/2019 7:20 | 0.3417 | -0.35   | 4.2331 | -0.4917 | 1.9409 | 8      | 0.1065 | 2.2292 |
| 4/21/2019 7:21 | 0.4    | 0.0333  | 4.2627 | -0.4333 | 1.9488 | 8      | 0.1011 | 2.2068 |
| 4/21/2019 7:22 | 0.35   | -0.15   | 4.2391 | -0.0417 | 1.9491 | 8      | 0.1055 | 2.2068 |
| 4/21/2019 7:23 | 0.35   | -0.2333 | 4.1664 | -0.2167 | 1.948  | 8      | 0.106  | 2.1895 |
| 4/21/2019 7:24 | 0.375  | -0.25   | 4.5297 | -0.675  | 1.9513 | 8      | 0.0959 | 2.1997 |
| 4/21/2019 7:25 | 0.3667 | -0.7833 | 4.2415 | -0.3167 | 1.9349 | 8      | 0.113  | 2.2018 |
| 4/21/2019 7:26 | 0.3    | -0.7833 | 4.4018 | -0.6667 | 1.9416 | 8      | 0.1015 | 2.1649 |
| 4/21/2019 7:27 | 0.3    | -0.1833 | 4.2887 | -0.4583 | 1.9612 | 7.9364 | 0.1053 | 2.1727 |
| 4/21/2019 7:28 | 0.375  | 0.0167  | 4.4172 | -0.5    | 1.9581 | 7.9    | 0.1172 | 2.1855 |
| 4/21/2019 7:29 | 0.4    | -0.7667 | 4.2975 | -0.5    | 1.9489 | 7.9    | 0.1095 | 2.1835 |
| 4/21/2019 7:30 | 0.4    | -0.85   | 4.5037 | -0.3333 | 1.9328 | 7.9    | 0.1108 | 2.2073 |
| 4/21/2019 7:31 | 0.3667 | -0.0167 | 4.3129 | -0.1667 | 1.9384 | 7.8455 | 0.1034 | 2.1806 |
| 4/21/2019 7:32 | 0.3083 | -0.0667 | 4.5516 | -0.4583 | 1.9468 | 7.8    | 0.1016 | 2.1741 |
| 4/21/2019 7:33 | 0.4    | -0.95   | 4.1747 | -0.475  | 1.9468 | 7.8    | 0.108  | 2.1742 |
| 4/21/2019 7:34 | 0.5    | 0.2333  | 4.5283 | -0.275  | 1.9319 | 7.8    | 0.0961 | 2.1981 |
| 4/21/2019 7:35 | 0.5917 | -0.5833 | 4.5367 | -0.6083 | 1.9349 | 7.8    | 0.1151 | 2.2228 |
| 4/21/2019 7:36 | 0.6    | -0.5833 | 4.2936 | -0.1083 | 1.9371 | 7.8    | 0.1029 | 2.2174 |
| 4/21/2019 7:37 | 0.6    | -0.3333 | 4.3473 | -0.0917 | 1.9233 | 7.8    | 0.0983 | 2.1644 |
| 4/21/2019 7:38 | 0.6    | 0.15    | 4.2734 | -0.3    | 1.9281 | 7.8    | 0.112  | 2.1899 |
| 4/21/2019 7:39 | 0.6    | -0.9333 | 4.3149 | -0.75   | 1.9143 | 7.8    | 0.0905 | 2.1883 |
| 4/21/2019 7:40 | 0.6083 | -0.1833 | 4.3451 | -0.3083 | 1.9231 | 7.8    | 0.1112 | 2.1838 |
| 4/21/2019 7:41 | 0.6    | 0.0667  | 4.1203 | -0.5083 | 1.9238 | 7.8    | 0.1085 | 2.2289 |
| 4/21/2019 7:42 | 0.6    | -0.1333 | 4.4785 | -0.825  | 1.9186 | 7.8    | 0.1059 | 2.2115 |
| 4/21/2019 7:43 | 0.5667 | 0       | 4.3137 | -0.2333 | 1.9253 | 7.8    | 0.1111 | 2.2221 |
| 4/21/2019 7:44 | 0.5    | 0.0333  | 4.3139 | -0.25   | 1.9203 | 7.8    | 0.1021 | 2.2177 |
| 4/21/2019 7:45 | 0.5417 | -0.55   | 4.6558 | -0.8417 | 1.9289 | 7.8    | 0.1102 | 2.1963 |
| 4/21/2019 7:46 | 0.5417 | -0.2167 | 4.3775 | -1.0917 | 1.9252 | 7.8    | 0.1012 | 2.1682 |
| 4/21/2019 7:47 | 0.5    | -0.2833 | 4.3711 | -0.4083 | 1.9093 | 7.8    | 0.1047 | 2.161  |
| 4/21/2019 7:48 | 0.4333 | -0.25   | 4.466  | 0.0417  | 1.91   | 7.8    | 0.1088 | 2.157  |
| 4/21/2019 7:49 | 0.5    | 0.0667  | 4.0067 | 0.1833  | 1.9011 | 7.8    | 0.0914 | 2.1774 |
| 4/21/2019 7:50 | 0.5083 | -0.8833 | 4.2259 | -0.5083 | 1.8756 | 7.8    | 0.1048 | 2.2083 |
| 4/21/2019 7:51 | 0.5583 | 0.3333  | 4.3471 | 0.1417  | 1.8773 | 7.8    | 0.1058 | 2.2274 |
| 4/21/2019 7:52 | 0.5    | -0.5833 | 4.0884 | -0.45   | 1.88   | 7.8    | 0.1029 | 2.2143 |
| 4/21/2019 7:53 | 0.5    | -0.6667 | 4.2512 | -1.1833 | 1.891  | 7.7636 | 0.1151 | 2.1798 |
| 4/21/2019 7:54 | 0.5    | 0.0333  | 3.9087 | -0.0417 | 1.8787 | 7.7    | 0.0976 | 2.1798 |

|                |        |         |         |         |        |        |        |        |
|----------------|--------|---------|---------|---------|--------|--------|--------|--------|
| 4/21/2019 7:55 | 0.5    | -0.5    | 4.1413  | -0.475  | 1.8688 | 7.7    | 0.1106 | 2.1923 |
| 4/21/2019 7:56 | 0.5    | -0.75   | 4.2649  | -0.125  | 1.8839 | 7.7    | 0.098  | 2.2084 |
| 4/21/2019 7:57 | 0.5    | 0.4167  | 4.2356  | -0.325  | 1.8652 | 7.7636 | 0.0999 | 2.1952 |
| 4/21/2019 7:58 | 0.5    | -0.3    | 4.3027  | -0.75   | 1.8813 | 7.8    | 0.1049 | 2.188  |
| 4/21/2019 7:59 | 0.5083 | -0.5    | 4.4833  | -0.1917 | 1.8855 | 7.8    | 0.1017 | 2.195  |
| 4/21/2019 8:00 | 0.5833 | 0.35    | 4.3728  | -1.1667 | 1.8765 | 7.8    | 0.1029 | 2.1851 |
| 4/21/2019 8:01 | 0.6    | -0.2333 | 4.1856  | 0.175   | 1.8574 | 7.8    | 0.1081 | 2.1933 |
| 4/21/2019 8:02 | 0.6    | -0.1833 | 4.2216  | -0.4833 | 1.8599 | 7.8    | 0.1001 | 2.2023 |
| 4/21/2019 8:03 | 0.6    | -0.3    | 4.097   | -0.7417 | 1.8507 | 7.8    | 0.1237 | 2.1892 |
| 4/21/2019 8:04 | 0.65   | -0.6333 | 4.0912  | -0.4417 | 1.8774 | 7.8    | 0.0933 | 2.1975 |
| 4/21/2019 8:05 | 0.6333 | -0.3333 | 4.1562  | -0.4167 | 1.8717 | 7.8    | 0.1066 | 2.1978 |
| 4/21/2019 8:06 | 0.6583 | -0.1167 | 4.2132  | -0.1583 | 1.8613 | 7.8    | 0.1106 | 2.1898 |
| 4/21/2019 8:07 | 0.7    | -0.1167 | 4.3473  | -0.0333 | 1.8594 | 7.8    | 0.1069 | 2.174  |
| 4/21/2019 8:08 | 0.7333 | -0.45   | 4.4132  | -0.55   | 1.8427 | 7.87   | 0.112  | 2.2001 |
| 4/21/2019 8:09 | 0.8    | -0.4    | 4.2735  | -0.3833 | 1.8501 | 7.8636 | 0.102  | 2.208  |
| 4/21/2019 8:10 | 0.8    | -0.6    | 4.2397  | -1      | 1.8485 | 7.8667 | 0.1014 | 2.2341 |
| 4/21/2019 8:11 | 0.8    | -0.5    | 4.4565  | -0.5583 | 1.8444 | 7.9    | 0.1021 | 2.2065 |
| 4/21/2019 8:12 | 0.7333 | -0.5    | 4.2422  | -0.8583 | 1.8503 | 7.9273 | 0.0963 | 2.1768 |
| 4/21/2019 8:13 | 0.7    | 0.1667  | 4.2943  | 0.275   | 1.8534 | 7.96   | 0.1155 | 2.1816 |
| 4/21/2019 8:14 | 0.6833 | 0.25    | 4.4523  | -0.45   | 1.8648 | 8      | 0.1022 | 2.2058 |
| 4/21/2019 8:15 | 0.6    | -0.45   | 4.5163  | -0.1083 | 1.8421 | 8      | 0.108  | 2.1988 |
| 4/21/2019 8:16 | 0.6    | -0.4667 | 4.4418  | -0.7417 | 1.8561 | 8.08   | 0.1144 | 2.204  |
| 4/21/2019 8:17 | 0.6    | -0.45   | 4.4238  | -0.2917 | 1.8468 | 8.1    | 0.0997 | 2.2076 |
| 4/21/2019 8:18 | 0.6    | -0.0167 | 4.5225  | -0.825  | 1.8334 | 8.1    | 0.1152 | 2.2358 |
| 4/21/2019 8:19 | 0.5417 | -0.25   | 4.4417  | -0.2667 | 1.8479 | 8.1    | 0.0998 | 2.23   |
| 4/21/2019 8:20 | 0.5    | -0.8833 | 4.4195  | -0.1583 | 1.8419 | 8.0818 | 0.103  | 2.2148 |
| 4/21/2019 8:21 | 0.475  | -0.2333 | 4.5598  | -0.6333 | 1.849  | 8      | 0.114  | 2.2096 |
| 4/21/2019 8:22 | 0.4    | -0.1333 | 4.3747  | -1.0833 | 1.8382 | 8.0273 | 0.1048 | 2.2128 |
| 4/21/2019 8:23 | 0.4    | -0.4167 | 4.5087  | -0.3417 | 1.8427 | 8      | 0.1178 | 2.2253 |
| 4/21/2019 8:24 | 0.4    | -0.2333 | 4.1042  | -0.775  | 1.8455 | 8      | 0.1114 | 2.2207 |
| 4/21/2019 8:25 | 0.4    | -0.3167 | 4.347   | -0.8417 | 1.8467 | 8      | 0.1015 | 2.2256 |
| 4/21/2019 8:26 | 0.4667 | -0.05   | 4.6573  | -0.3667 | 1.8373 | 8      | 0.1087 | 2.2198 |
| 4/21/2019 8:27 | 0.5    | -0.4    | 4.314   | -0.1583 | 1.8637 | 8      | 0.102  | 2.2288 |
| 4/21/2019 8:28 | 0.5    | -0.1667 | 4.4873  | -0.4333 | 1.862  | 8      | 0.113  | 2.2318 |
| 4/21/2019 8:29 | 0.5    | -0.65   | 4.2132  | -0.3833 | 1.8473 | 8      | 0.1119 | 2.2809 |
| 4/21/2019 8:30 | 0.5    | -0.6    | 4.3863  | -0.6583 | 1.8638 | 8      | 0.0968 | 2.2534 |
| 4/21/2019 8:31 | 0.5    | -0.1    | 4.411   | -0.3917 | 1.8639 | 8      | 0.119  | 2.2307 |
| 4/21/2019 8:32 | 0.5667 | 0.95    | 21.9017 | 38.3583 | 2.0628 | 7.9273 | 0.1058 | 2.2519 |
| 4/21/2019 8:33 | 0.7167 | 0.9     | 20.29   | 10.0083 | 1.746  | 7.8667 | 0.1098 | 2.2867 |
| 4/21/2019 8:34 | 0.8    | -0.1    | 8.2002  | 0.6833  | 1.1465 | 7.3333 | 0.1169 | 2.2756 |
| 4/21/2019 8:35 | 0.775  | 1.0167  | 6.8067  | 0.225   | 1.0719 | 6.79   | 0.1003 | 2.2513 |
| 4/21/2019 8:36 | 0.5833 | 0.6     | 5.43    | -0.4917 | 1.0653 | 6.2545 | 0.1144 | 2.2591 |
| 4/21/2019 8:37 | 0.5    | 0.5     | 4.6872  | 0.2667  | 1.0542 | 5.71   | 0.1019 | 2.2779 |
| 4/21/2019 8:38 | 0.5    | 1.0333  | 3.605   | 0.4167  | 1.0338 | 5.18   | 0.1082 | 2.2366 |
| 4/21/2019 8:39 | 0.525  | 0.1667  | 3.3327  | 0.0833  | 1.0254 | 4.59   | 0.111  | 2.2368 |
| 4/21/2019 8:40 | 0.5917 | 0.4833  | 2.2802  | 0.2167  | 1.0154 | 4.0545 | 0.0958 | 2.2431 |
| 4/21/2019 8:41 | 0.6    | 0.8833  | 2.1438  | 0.2167  | 1.0083 | 3.51   | 0.1119 | 2.2394 |

|                |        |        |        |         |        |        |        |        |
|----------------|--------|--------|--------|---------|--------|--------|--------|--------|
| 4/21/2019 8:42 | 0.6    | 0.55   | 1.9312 | 0.4     | 0.9853 | 3.06   | 0.1035 | 2.2458 |
| 4/21/2019 8:43 | 0.5333 | 0.0167 | 1.768  | 0.175   | 0.9797 | 2.4636 | 0.1138 | 2.2568 |
| 4/21/2019 8:44 | 0.5    | 0      | 1.4762 | 0       | 0.9649 | 1.94   | 0.111  | 2.2491 |
| 4/21/2019 8:45 | 0.5083 | 0.1    | 1.285  | 0.0917  | 0.9423 | 1.4364 | 0.0953 | 2.2232 |
| 4/21/2019 8:46 | 0.5    | 0.4    | 1.0497 | -0.3167 | 0.9286 | 1.3    | 0.1054 | 2.2048 |
| 4/21/2019 8:47 | 0.5167 | 0.0167 | 0.6629 | 0.1917  | 0.904  | 1.3    | 0.0966 | 2.1941 |
| 4/21/2019 8:48 | 0.5    | 0.2    | 0.8821 | 0.15    | 0.88   | 1.3    | 0.0923 | 2.1793 |
| 4/21/2019 8:49 | 0.5333 | -0.1   | 0.6321 | -0.275  | 0.882  | 1.3    | 0.1033 | 2.1671 |
| 4/21/2019 8:50 | 0.5    | 0.2    | 0.5899 | 0.0833  | 0.8798 | 1.3    | 0.0899 | 2.1638 |
| 4/21/2019 8:51 | 0.5    | 0.2333 | 0.4063 | 0.4833  | 0.8531 | 1.3    | 0.0932 | 2.1574 |
| 4/21/2019 8:52 | 0.5    | 0.3    | 0.1223 | 1.05    | 0.8286 | 1.3    | 0.0895 | 2.1673 |
| 4/21/2019 8:53 |        |        |        |         |        |        | 0.0861 | 2.1842 |
| 4/21/2019 8:54 |        |        |        |         |        |        | 0.1014 | 2.2163 |
| 4/21/2019 8:55 |        |        |        |         |        |        | 0.0944 | 2.1986 |
| 4/21/2019 8:56 |        |        |        |         |        |        | 0.0956 | 2.1963 |
| 4/21/2019 8:57 |        |        |        |         |        |        | 0.1007 | 2.198  |
| 4/21/2019 8:58 |        |        |        |         |        |        | 0.0903 | 2.1984 |
| 4/21/2019 8:59 |        |        |        |         |        |        | 0.1087 | 2.2101 |
| 4/21/2019 9:00 |        |        |        |         |        |        | 0.1051 | 2.214  |
| 4/21/2019 9:01 |        |        |        |         |        |        | 0.0948 | 2.2313 |
| 4/21/2019 9:02 |        |        |        |         |        |        | 0.1077 | 2.2229 |
| 4/21/2019 9:03 |        |        |        |         |        |        | 0.1047 | 2.2235 |
| 4/21/2019 9:04 |        |        |        |         |        |        | 0.1048 | 2.2003 |
| 4/21/2019 9:05 |        |        |        |         |        |        | 0.1094 | 2.1987 |
| 4/21/2019 9:06 |        |        |        |         |        |        | 0.0991 | 2.1889 |
| 4/21/2019 9:07 |        |        |        |         |        |        | 0.1059 | 2.2086 |
| 4/21/2019 9:08 |        |        |        |         |        |        | 0.1095 | 2.1974 |
| 4/21/2019 9:09 |        |        |        |         |        |        | 0.0983 | 2.1823 |
| 4/21/2019 9:10 |        |        |        |         |        |        | 0.107  | 2.2023 |
| 4/21/2019 9:11 |        |        |        |         |        |        | 0.1104 | 2.2317 |
| 4/21/2019 9:12 |        |        |        |         |        |        | 0.1046 | 2.2312 |
| 4/21/2019 9:13 |        |        |        |         |        |        | 0.1104 | 2.2198 |
| 4/21/2019 9:14 |        |        |        |         |        |        | 0.1033 | 2.2138 |
| 4/21/2019 9:15 |        |        |        |         |        |        | 0.1202 | 2.2181 |
| 4/21/2019 9:16 |        |        |        |         |        |        | 0.1115 | 2.2293 |
| 4/21/2019 9:17 |        |        |        |         |        |        | 0.1071 | 2.2261 |
| 4/21/2019 9:18 |        |        |        |         |        |        | 0.121  | 2.2513 |
| 4/21/2019 9:19 |        |        |        |         |        |        | 0.108  | 2.2405 |
| 4/21/2019 9:20 |        |        |        |         |        |        | 0.1143 | 2.2292 |
| 4/21/2019 9:21 |        |        |        |         |        |        | 0.1093 | 2.2281 |
| 4/21/2019 9:22 |        |        |        |         |        |        | 0.0938 | 2.2398 |
| 4/21/2019 9:23 |        |        |        |         |        |        | 0.1105 | 2.264  |
| 4/21/2019 9:24 |        |        |        |         |        |        | 0.1017 | 2.2614 |
| 4/21/2019 9:25 |        |        |        |         |        |        | 0.0992 | 2.2395 |
| 4/21/2019 9:26 |        |        |        |         |        |        | 0.1106 | 2.2288 |
| 4/21/2019 9:27 |        |        |        |         |        |        | 0.0922 | 2.2233 |
| 4/21/2019 9:28 |        |        |        |         |        |        | 0.1011 | 2.1997 |

|                 |        |        |
|-----------------|--------|--------|
| 4/21/2019 9:29  | 0.0983 | 2.1908 |
| 4/21/2019 9:30  | 0.0948 | 2.1805 |
| 4/21/2019 9:31  | 0.1084 | 2.1699 |
| 4/21/2019 9:32  | 0.0912 | 2.1627 |
| 4/21/2019 9:33  | 0.1025 | 2.1903 |
| 4/21/2019 9:34  | 0.1052 | 2.2246 |
| 4/21/2019 9:35  | 0.0964 | 2.2313 |
| 4/21/2019 9:36  | 0.1089 | 2.209  |
| 4/21/2019 9:37  | 0.1028 | 2.2318 |
| 4/21/2019 9:38  | 0.1004 | 2.2193 |
| 4/21/2019 9:39  | 0.1084 | 2.1699 |
| 4/21/2019 9:40  | 0.0907 | 2.1755 |
| 4/21/2019 9:41  | 0.1106 | 2.1863 |
| 4/21/2019 9:42  | 0.1062 | 2.1922 |
| 4/21/2019 9:43  | 0.1076 | 2.2223 |
| 4/21/2019 9:44  | 0.1107 | 2.2255 |
| 4/21/2019 9:45  | 0.1011 | 2.228  |
| 4/21/2019 9:46  | 0.1085 | 2.214  |
| 4/21/2019 9:47  | 0.1122 | 2.2208 |
| 4/21/2019 9:48  | 0.1013 | 2.2103 |
| 4/21/2019 9:49  | 0.1135 | 2.2204 |
| 4/21/2019 9:50  | 0.1092 | 2.2241 |
| 4/21/2019 9:51  | 0.1086 | 2.23   |
| 4/21/2019 9:52  | 0.1156 | 2.2416 |
| 4/21/2019 9:53  | 0.1077 | 2.2341 |
| 4/21/2019 9:54  | 0.1054 | 2.2473 |
| 4/21/2019 9:55  | 0.1164 | 2.2135 |
| 4/21/2019 9:56  | 0.1064 | 2.1958 |
| 4/21/2019 9:57  | 0.1192 | 2.2013 |
| 4/21/2019 9:58  | 0.1085 | 2.228  |
| 4/21/2019 9:59  | 0.1064 | 2.2133 |
| 4/21/2019 10:00 | 0.1236 | 2.2193 |
| 4/21/2019 10:01 | 0.0995 | 2.2152 |
| 4/21/2019 10:02 | 0.1162 | 2.2255 |
| 4/21/2019 10:03 | 0.107  | 2.224  |
| 4/21/2019 10:04 | 0.1142 | 2.2283 |
| 4/21/2019 10:05 | 0.1204 | 2.2027 |
| 4/21/2019 10:06 | 0.1056 | 2.2041 |
| 4/21/2019 10:07 | 0.1198 | 2.1955 |
| 4/21/2019 10:08 | 0.107  | 2.2029 |
| 4/21/2019 10:09 | 0.1137 | 2.199  |
| 4/21/2019 10:10 | 0.124  | 2.1786 |
| 4/21/2019 10:11 | 0.1086 | 2.1834 |
| 4/21/2019 10:12 | 0.1175 | 2.2048 |
| 4/21/2019 10:13 | 0.1158 | 2.2114 |
| 4/21/2019 10:14 | 0.1122 | 2.2119 |
| 4/21/2019 10:15 | 0.1229 | 2.1967 |

|                 |        |         |        |         |        |        |         |        |
|-----------------|--------|---------|--------|---------|--------|--------|---------|--------|
| 4/21/2019 10:16 |        |         |        |         |        |        | 0.106   | 2.1579 |
| 4/21/2019 10:17 |        |         |        |         |        |        | 0.1152  | 2.1753 |
| 4/21/2019 10:18 |        |         |        |         |        |        | 0.1218  | 2.1988 |
| 4/21/2019 10:19 |        |         |        |         |        |        | 0.1064  | 2.1889 |
| 4/21/2019 10:20 |        |         |        |         |        |        | 0.1243  | 2.2113 |
| 4/21/2019 10:21 |        |         |        |         |        |        | 0.1135  | 2.1752 |
| 4/21/2019 10:22 |        |         |        |         |        |        | 0.5301  | 2.1802 |
| 4/21/2019 10:23 |        |         |        |         |        |        | 0.3909  | 2.1898 |
| 4/21/2019 10:24 |        |         |        |         |        |        | 0.1563  | 2.2005 |
| 4/21/2019 10:25 |        |         |        |         |        |        | 0.1654  | 2.213  |
| 4/21/2019 10:26 |        |         |        |         |        |        | 0.1448  | 2.186  |
| 4/21/2019 10:27 |        |         |        |         |        |        | 0.1372  | 2.1753 |
| 4/21/2019 10:28 |        |         |        |         |        |        | 0.1456  | 2.1877 |
| 4/21/2019 10:29 |        |         |        |         |        |        | 0.0984  | 2.197  |
| 4/21/2019 10:30 |        |         |        |         |        |        | -0.038  | 2.1742 |
| 4/21/2019 10:31 |        |         |        |         |        |        | -0.0501 | 2.198  |
| 4/21/2019 10:32 |        |         |        |         |        |        | -0.0542 | 2.1943 |
| 4/21/2019 10:33 | 0.7    | -0.3833 | 4.0116 | -0.825  | 0.5913 | 6.4667 |         | 2.2198 |
| 4/21/2019 10:34 | 0.6833 | 0.1     | 3.6108 | -0.8917 | 0.5913 | 6.4    |         | 2.2032 |
| 4/21/2019 10:35 | 0.6667 | -0.6167 | 3.6428 | -0.475  | 0.5913 | 6.4    |         | 2.1913 |
| 4/21/2019 10:36 | 0.6333 | -0.3    | 3.8713 | -0.8833 | 0.5913 | 6.4    |         | 2.1968 |
| 4/21/2019 10:37 | 0.6417 | -0.35   | 3.4328 | -0.75   | 0.5913 | 6.4    |         | 2.1913 |
| 4/21/2019 10:38 | 0.6417 | -0.4333 | 4.0399 | 0.0583  | 0.5913 | 6.4222 |         | 2.1743 |
| 4/21/2019 10:39 | 0.6667 | -0.2667 | 3.7098 | -0.4833 | 0.5913 | 6.5    |         | 2.2101 |
| 4/21/2019 10:40 | 0.6833 | -1.2833 | 3.9387 | -0.1    | 0.5913 | 6.5    |         | 2.206  |
| 4/21/2019 10:41 | 0.6667 | -0.2167 | 4.0101 | -0.0083 | 0.5913 | 6.5    |         | 2.2173 |
| 4/21/2019 10:42 | 0.6583 | -0.3    | 3.9933 | -0.4167 | 0.5913 | 6.5    |         | 2.2288 |
| 4/21/2019 10:43 | 0.6    | -0.4167 | 4.1082 | -0.2917 | 0.5913 | 6.5    |         | 2.2228 |
| 4/21/2019 10:44 | 0.6    | -0.1167 | 3.9325 | -0.1917 | 0.5913 | 6.5    |         | 2.2045 |
| 4/21/2019 10:45 | 0.5917 | -0.3    | 3.7044 | -0.0083 | 0.5913 | 6.5    |         | 2.228  |
| 4/21/2019 10:46 | 0.6    | -0.5833 | 4.2296 | -0.5167 | 0.5913 | 6.5    |         | 2.2146 |
| 4/21/2019 10:47 | 0.6083 | -0.4667 | 3.974  | -0.3417 | 0.5913 | 6.5    |         | 2.195  |
| 4/21/2019 10:48 | 0.6417 | -0.3833 | 4.0185 | -0.7667 | 0.5913 | 6.5    |         | 2.1986 |
| 4/21/2019 10:49 | 0.6333 | -0.1333 | 3.8266 | -0.4917 | 0.5913 | 6.5    |         | 2.2153 |
| 4/21/2019 10:50 | 0.6083 | -0.0333 | 4.1669 | -0.575  | 0.5913 | 6.44   |         | 2.2059 |
| 4/21/2019 10:51 | 0.675  | -0.8833 | 3.9268 | -0.6167 | 0.5913 | 6.4    |         | 2.1807 |
| 4/21/2019 10:52 | 0.6    | -1      | 3.9843 | -1.0917 | 0.5913 | 6.4    |         | 2.1838 |
| 4/21/2019 10:53 | 0.6    | -0.6167 | 4.3594 | -0.8333 | 0.5913 | 6.4    |         | 2.1706 |
| 4/21/2019 10:54 | 0.6    | -0.4667 | 3.9491 | -0.1583 | 0.5913 | 6.4    |         | 2.1613 |
| 4/21/2019 10:55 | 0.6417 | 0.2167  | 4.1993 | -0.9333 | 0.5913 | 6.4    |         | 2.1848 |
| 4/21/2019 10:56 | 0.6917 | 0.2667  | 3.9354 | -0.5917 | 0.5913 | 6.4583 |         | 2.222  |
| 4/21/2019 10:57 | 0.6917 | -0.4    | 4.3029 | -0.8167 | 0.5913 | 6.48   |         | 2.1859 |
| 4/21/2019 10:58 | 0.6    | -0.4333 | 3.8824 | -0.55   | 0.5913 | 6.4091 |         | 2.1847 |
| 4/21/2019 10:59 | 0.6    | -0.5    | 3.9705 | -0.0667 | 0.5913 | 6.41   |         | 2.1722 |
| 4/21/2019 11:00 | 0.6    | -0.5    | 4.0159 | -0.1    | 0.5913 | 6.5    |         | 2.1791 |
| 4/21/2019 11:01 | 0.6    | 0.2     | 4.2597 | -1.1    | 0.5913 | 6.5    |         | 2.2086 |
| 4/21/2019 11:02 | 0.6    | -0.1    | 4.0941 | -0.3    | 0.5913 | 6.5    |         | 2.2029 |



|                 |        |         |        |         |        |        |        |
|-----------------|--------|---------|--------|---------|--------|--------|--------|
| 4/21/2019 11:03 | 0.6    | -0.45   | 3.2228 | -0.3583 | 0.5913 | 6.58   | 2.1978 |
| 4/21/2019 11:04 | 0.6    | -0.45   | 3.1448 | -0.5    | 0.5913 | 6.6    | 2.1961 |
| 4/21/2019 11:05 | 0.6    | 0       | 4.0355 | -0.3667 | 0.5913 | 6.6    | 2.1837 |
| 4/21/2019 11:06 | 0.6    | -0.2667 | 4.2187 | -0.275  | 0.5913 | 6.6    | 2.1888 |
| 4/21/2019 11:07 | 0.6    | -0.8    | 4.2182 | -0.3167 | 0.5913 | 6.6    | 2.1827 |
| 4/21/2019 11:08 | 0.6    | -0.5167 | 3.8767 | -0.2333 | 0.5913 | 6.6    | 2.1564 |
| 4/21/2019 11:09 | 0.6    | -0.1    | 3.1788 | -0.2    | 0.5913 | 6.6    | 2.1898 |
| 4/21/2019 11:10 | 0.6    | 0.2833  | 3.4163 | -0.3167 | 0.5913 | 6.6    | 2.198  |
| 4/21/2019 11:11 | 0.5917 | -0.2    | 3.943  | -0.3167 | 0.5913 | 6.6    | 2.2002 |
| 4/21/2019 11:12 | 0.5167 | 0.2333  | 3.8628 | -0.275  | 0.5913 | 6.5727 | 2.2111 |
| 4/21/2019 11:13 | 0.5    | -0.5    | 4.3113 | -0.45   | 0.5913 | 6.5    | 2.1955 |
| 4/21/2019 11:14 | 0.5    | 0       | 3.9442 | -0.1333 | 0.5913 | 6.5    | 2.2039 |
| 4/21/2019 11:15 | 0.5667 | -0.2    | 4.4122 | -0.6167 | 0.5913 | 6.5    | 2.2075 |
| 4/21/2019 11:16 | 0.6    | 0.0833  | 3.8653 | 0.025   | 0.5913 | 6.5    | 2.1826 |
| 4/21/2019 11:17 | 0.55   | -0.2667 | 3.6327 | -0.6    | 0.5913 | 6.4364 | 2.1898 |
| 4/21/2019 11:18 | 0.5    | -0.15   | 3.7992 | -0.8167 | 0.5913 | 6.4    | 2.1845 |
| 4/21/2019 11:19 | 0.5167 | -0.55   | 4.0237 | -0.1917 | 0.5913 | 6.4    | 2.186  |
| 4/21/2019 11:20 | 0.5833 | 0.1333  | 4.1377 | -0.1333 | 0.5913 | 6.4    | 2.2108 |
| 4/21/2019 11:21 | 0.6    | -0.5167 | 3.6795 | -0.6833 | 0.5913 | 6.4    | 2.1822 |
| 4/21/2019 11:22 | 0.6    | -0.4667 | 3.1258 | -0.1917 | 0.5913 | 6.4    | 2.1683 |
| 4/21/2019 11:23 | 0.6    | -0.0333 | 4.5443 | -0.5167 | 0.5913 | 6.4    | 2.1952 |
| 4/21/2019 11:24 | 0.6    | -0.3167 | 3.956  | -0.8417 | 0.5913 | 6.4    | 2.1921 |
| 4/21/2019 11:25 | 0.6    | -0.05   | 3.6707 | -0.9583 | 0.5913 | 6.4    | 2.1548 |
| 4/21/2019 11:26 | 0.6    | -0.2167 | 3.6573 | -0.6667 | 0.5913 | 6.32   | 2.1327 |
| 4/21/2019 11:27 | 0.6    | 0.0667  | 4.5245 | -0.2333 | 0.5913 | 6.3    | 2.1514 |
| 4/21/2019 11:28 | 0.6333 | -0.3333 | 4.3813 | -0.2583 | 0.5913 | 6.3    | 2.1544 |
| 4/21/2019 11:29 | 0.7    | -0.35   | 4.1612 | -0.3333 | 0.5913 | 6.3    | 2.1671 |
| 4/21/2019 11:30 | 0.6667 | 0.2333  | 4.1327 | -0.2083 | 0.5913 | 6.3455 | 2.2011 |
| 4/21/2019 11:31 | 0.6333 | -0.1    | 4.2582 | -0.1333 | 0.5913 | 6.4    | 2.1933 |
| 4/21/2019 11:32 | 0.7    | 0.2     | 4.1188 | 0.175   | 0.5913 | 6.3364 | 2.1428 |
| 4/21/2019 11:33 | 0.7083 | -0.4167 | 4.161  | -0.2417 | 0.5913 | 6.3    | 2.1693 |
| 4/21/2019 11:34 | 0.7    | -0.6167 | 4.1642 | 0.2417  | 0.5913 | 6.3    | 2.1871 |
| 4/21/2019 11:35 | 0.7    | -0.3333 | 4.3195 | 0.2833  | 0.5913 | 6.3    | 2.1735 |
| 4/21/2019 11:36 | 0.675  | -0.1833 | 4.2397 | -0.8    | 0.5913 | 6.3    | 2.1569 |
| 4/21/2019 11:37 | 0.625  | -0.1667 | 4.0037 | -0.6333 | 0.5913 | 6.3    | 2.1769 |
| 4/21/2019 11:38 | 0.6    | -0.15   | 4.1152 | -0.6417 | 0.5913 | 6.3    | 2.1779 |
| 4/21/2019 11:39 | 0.6    | 0.1333  | 4.0695 | -0.5667 | 0.5913 | 6.3    | 2.1439 |
| 4/21/2019 11:40 | 0.5833 | -0.6667 | 4.2413 | -0.2917 | 0.5913 | 6.3    | 2.1298 |
| 4/21/2019 11:41 | 0.5    | -0.5    | 4.5125 | -0.5833 | 0.5913 | 6.3    | 2.1489 |
| 4/21/2019 11:42 | 0.5667 | -0.0833 | 4.2572 | -0.3833 | 0.5913 | 6.3    | 2.1367 |
| 4/21/2019 11:43 | 0.5083 | -0.1833 | 4.2998 | -0.1833 | 0.5913 | 6.24   | 2.1286 |
| 4/21/2019 11:44 | 0.6    | -0.1333 | 4.4577 | -0.1083 | 0.5913 | 6.2    | 2.1485 |
| 4/21/2019 11:45 | 0.6    | -1.0333 | 4.2718 | -0.275  | 0.5913 | 6.1273 | 2.1651 |
| 4/21/2019 11:46 | 0.6083 | -0.3667 | 4.1858 | -0.3833 | 0.5913 | 6.1    | 2.1583 |
| 4/21/2019 11:47 | 0.625  | 0.0333  | 4.2082 | 0.0667  | 0.5913 | 6.1    | 2.1762 |
| 4/21/2019 11:48 | 0.675  | 0.5     | 4.323  | -0.6667 | 0.5913 | 6.1    | 2.1896 |
| 4/21/2019 11:49 | 0.7    | -0.1167 | 4.4963 | -0.1    | 0.5913 | 6.1    | 2.1633 |

|                 |        |         |        |         |        |        |        |
|-----------------|--------|---------|--------|---------|--------|--------|--------|
| 4/21/2019 11:50 | 0.7    | -0.2833 | 4.263  | -0.0333 | 0.5913 | 6.1    | 2.1577 |
| 4/21/2019 11:51 | 0.7083 | 0.5167  | 4.2743 | -0.0083 | 0.5913 | 6.0833 | 2.1746 |
| 4/21/2019 11:52 | 0.8    | 0.25    | 4.1805 | -0.6417 | 0.5913 | 6      | 2.149  |
| 4/21/2019 11:53 | 0.8    | 0.1833  | 3.9873 | -1      | 0.5913 | 6      | 2.1258 |
| 4/21/2019 11:54 | 0.85   | 0.0167  | 4.3587 | -0.0833 | 0.5913 | 6      | 2.1353 |
| 4/21/2019 11:55 | 0.8833 | -0.65   | 4.328  | 0.1083  | 0.5913 | 6      | 2.1286 |
| 4/21/2019 11:56 | 0.8917 | -0.0667 | 4.3922 | -0.2    | 0.5913 | 6.0818 | 2.1515 |
| 4/21/2019 11:57 | 0.8167 | 0       | 4.43   | 0.0333  | 0.5913 | 6.1    | 2.161  |
| 4/21/2019 11:58 | 0.8083 | -0.05   | 4.054  | -0.6917 | 0.5913 | 6.1    | 2.1528 |
| 4/21/2019 11:59 | 0.8333 | 0.25    | 4.1082 | -0.2083 | 0.5913 | 6.1    | 2.1577 |
| 4/21/2019 12:00 | 0.8    | 0.2     | 3.8818 | -0.3083 | 0.5913 | 6.1    | 2.1566 |
| 4/21/2019 12:01 | 0.8    | -0.2167 | 4.2117 | -0.2917 | 0.5913 | 6.1    | 2.1266 |
| 4/21/2019 12:02 | 0.8    | 0.05    | 4.3562 | -0.275  | 0.5913 | 6.1    | 2.1604 |
| 4/21/2019 12:03 | 0.8167 | 0.35    | 4.1578 | -0.8417 | 0.5913 | 6.1    | 2.1409 |
| 4/21/2019 12:04 | 0.8    | 0.3     | 4.0837 | -0.6917 | 0.5913 | 6.1818 | 2.151  |
| 4/21/2019 12:05 | 0.8667 | -0.2667 | 3.9215 | 0.1583  | 0.5913 | 6.2    | 2.1383 |
| 4/21/2019 12:06 | 0.8083 | -0.3167 | 3.938  | -0.1583 | 0.5913 | 6.2    | 2.1218 |
| 4/21/2019 12:07 | 0.8    | 0.3333  | 4.1212 | -0.4833 | 0.5913 | 6.2    | 2.1326 |
| 4/21/2019 12:08 | 0.8    | 0.4667  | 4.1283 | -0.425  | 0.5913 | 6.2    | 2.1516 |
| 4/21/2019 12:09 | 0.8417 | 0.1333  | 3.9382 | -0.5667 | 0.5913 | 6.2    | 2.1468 |
| 4/21/2019 12:10 | 0.9    | 0.5167  | 3.9945 | -0.1083 | 0.5913 | 6.2    | 2.1345 |
| 4/21/2019 12:11 | 0.9    | 0.3667  | 4.3465 | -0.0417 | 0.5913 | 6.2    | 2.1417 |
| 4/21/2019 12:12 | 0.8833 | -0.0167 | 4.0008 | -0.0417 | 0.5913 | 6.26   | 2.1347 |
| 4/21/2019 12:13 | 0.8    | 0.2833  | 4.1342 | 0.2917  | 0.5913 | 6.3    | 2.1491 |
| 4/21/2019 12:14 | 0.8    | 0.3167  | 4.3263 | -0.4667 | 0.5913 | 6.3    | 2.1881 |
| 4/21/2019 12:15 | 0.8    | 0.0167  | 4.186  | -0.5    | 0.5913 | 6.3    | 2.1955 |
| 4/21/2019 12:16 | 0.8417 | -0.5333 | 4.077  | -0.0667 | 0.5913 | 6.3    | 2.1935 |
| 4/21/2019 12:17 | 0.85   | -0.3167 | 4.4942 | -0.05   | 0.5913 | 6.3    | 2.1541 |
| 4/21/2019 12:18 | 0.9    | -0.0833 | 4.11   | -0.7917 | 0.5913 | 6.3    | 2.1109 |
| 4/21/2019 12:19 | 0.9    | 0.6     | 4.2562 | -0.2083 | 0.5913 | 6.22   | 2.1162 |
| 4/21/2019 12:20 | 0.9    | -0.2833 | 4.1553 | -0.5417 | 0.5913 | 6.2    | 2.1311 |
| 4/21/2019 12:21 | 0.9    | 0.0167  | 4.1855 | -0.575  | 0.5913 | 6.2    | 2.125  |
| 4/21/2019 12:22 | 0.9    | -0.7667 | 4.1047 | -0.175  | 0.5913 | 6.2    | 2.1633 |
| 4/21/2019 12:23 | 0.9    | 0.35    | 3.9443 | -0.6417 | 0.5913 | 6.1333 | 2.1513 |
| 4/21/2019 12:24 | 0.9    | -0.2    | 4.191  | -0.1417 | 0.5913 | 6.1    | 2.1339 |
| 4/21/2019 12:25 | 0.9    | -0.7167 | 4.031  | -0.7083 | 0.5913 | 6.1    | 2.1263 |
| 4/21/2019 12:26 | 0.9083 | 0       | 3.9672 | 0.025   | 0.5913 | 6.1    | 2.1546 |
| 4/21/2019 12:27 | 0.9833 | -0.4833 | 4.1383 | 0.0583  | 0.5913 | 6.1    | 2.131  |
| 4/21/2019 12:28 | 0.9    | 0.1833  | 3.93   | 0.3583  | 0.5913 | 6.1    | 2.1238 |
| 4/21/2019 12:29 | 0.9    | 0.0833  | 4.0408 | -0.4083 | 0.5913 | 6      | 2.12   |
| 4/21/2019 12:30 | 0.9    | -0.3    | 4.3053 | -0.2333 | 0.5913 | 6      | 2.1352 |
| 4/21/2019 12:31 | 0.9    | -0.4333 | 4.18   | -0.4167 | 0.5913 | 6      | 2.1396 |
| 4/21/2019 12:32 | 0.9    | -0.6    | 4.143  | -0.6583 | 0.5913 | 6      | 2.1357 |
| 4/21/2019 12:33 | 0.85   | 0.1167  | 4.0259 | -0.4333 | 0.5913 | 6      | 2.1016 |
| 4/21/2019 12:34 | 0.8083 | 0.2833  | 4.164  | -0.5333 | 0.5913 | 6      | 2.0827 |
| 4/21/2019 12:35 | 0.8    | 0.3833  | 4.103  | -0.2833 | 0.5913 | 5.92   | 2.095  |
| 4/21/2019 12:36 | 0.8417 | 0.4833  | 3.9895 | -0.3667 | 0.5913 | 5.9    | 2.116  |

|                 |        |         |        |         |        |        |                |
|-----------------|--------|---------|--------|---------|--------|--------|----------------|
| 4/21/2019 12:37 | 0.8833 | -0.0167 | 3.9202 | -0.0917 | 0.5913 | 5.9    | 2.1273         |
| 4/21/2019 12:38 | 0.8083 | -0.1167 | 3.9531 | -0.45   | 0.5913 | 5.9    | 2.11           |
| 4/21/2019 12:39 | 0.8    | -0.65   | 3.8351 | -0.2833 | 0.5913 | 5.8    | 2.1299         |
| 4/21/2019 12:40 | 0.7818 | 0.15    | 4.0372 | -0.075  | 0.5913 | 5.8    | 2.1173         |
| 4/21/2019 12:41 | 0.775  | 0.25    | 4.1168 | -0.0417 | 0.5913 | 5.81   | 2.1069         |
| 4/21/2019 12:42 | 0.7083 | 0.2667  | 4.0709 | -0.2333 | 0.5913 | 5.8727 | 2.1208         |
| 4/21/2019 12:43 | 0.7    | -0.3167 | 3.7981 | -0.2083 | 0.5913 | 5.84   | 2.0933         |
| 4/21/2019 12:44 | 0.7    | -0.5167 | 3.878  | -0.2417 | 0.5913 | 5.8273 | 2.1306         |
| 4/21/2019 12:45 | 0.7    | -0.0333 | 3.8023 | -0.2083 | 0.5913 | 5.8    | 2.1428         |
| 4/21/2019 12:46 | 0.7    | 0.1167  | 3.9498 | -0.175  | 0.5913 | 5.8    | 2.1322         |
| 4/21/2019 12:47 | 0.7    | 0.3667  | 3.8895 | -0.1583 | 0.5913 | 5.8333 | 2.1374         |
| 4/21/2019 12:48 | 0.7    | 0.4167  | 3.9788 | -0.4167 | 0.5913 | 5.9    | 2.1427         |
| 4/21/2019 12:49 | 0.7    | 0.1333  | 4.1492 | 0.3667  | 0.5913 | 5.9    | 2.1276         |
| 4/21/2019 12:50 | 0.7    | 0.0333  | 3.9945 | -0.0417 | 0.5913 | 5.9    | 2.1138         |
| 4/21/2019 12:51 | 0.7    | -0.0333 | 3.9494 | -0.0833 | 0.5913 | 5.91   | 2.1084         |
| 4/21/2019 12:52 | 0.7    | 0.1167  | 4.1121 | 0.05    | 0.5913 | 5.9364 | 2.0941         |
| 4/21/2019 12:53 | 0.7083 | 0.0833  | 4.1369 | 0.1417  | 0.5913 | 5.92   | 2.0842         |
| 4/21/2019 12:54 | 0.7333 | 0.2667  | 4.2174 | -0.4167 | 0.5913 | 5.9273 | 2.1123         |
| 4/21/2019 12:55 | 0.8    | -0.6833 | 4.1713 | -0.325  | 0.5913 | 5.9    | 2.1163         |
| 4/21/2019 12:56 | 0.8    | -0.2333 | 4.2508 | 0.0583  | 0.5913 | 5.9    | 2.1018         |
| 4/21/2019 12:57 | 0.8833 | -0.8    | 4.3363 | -0.0833 | 0.5913 | 5.9    | 2.1466         |
| 4/21/2019 12:58 | 0.85   | 0.1167  | 4.0911 | 0.075   | 0.5913 | 5.9727 | 2.1123         |
| 4/21/2019 12:59 | 0.8083 | 0.35    | 4.1438 | 0.2083  | 0.5913 | 6      | 2.0989         |
| 4/21/2019 13:00 | 0.8583 | -0.0333 | 3.9471 | -0.7417 | 0.5913 | 5.9273 | 2.0971         |
| 4/21/2019 13:01 | 0.8    | -0.6    | 4.08   | -0.8333 | 0.5913 | 5.9    | 2.1221         |
| 4/21/2019 13:02 | 0.825  | 0.1667  | 4.1454 | -0.5333 | 0.5913 | 5.9    | 2.1373         |
| 4/21/2019 13:03 | 0.8    | 0.55    | 4.2149 | 0.1667  | 0.5913 | 5.8727 | 2.0909         |
| 4/21/2019 13:04 | 0.8    | 0.2     | 4.2263 | -0.075  | 0.5913 | 5.8727 | 2.0832         |
| 4/21/2019 13:05 | 0.8    | -0.1333 | 4.416  | -0.8833 | 0.5913 | 5.8    | 2.0766         |
| 4/21/2019 13:06 | 0.8    | -0.5333 | 4.3075 | -0.0583 | 0.5913 | 5.8    | 2.0727         |
| 4/21/2019 13:07 | 0.8    | -0.6    | 4.2489 | -0.4167 | 0.5913 | 5.8    | 2.09           |
| 4/21/2019 13:08 | 0.8    | 0       | 4.0111 | -0.175  | 0.5913 | 5.8    | 2.0674         |
| 4/21/2019 13:09 | 0.8417 | -0.4667 | 3.9838 | -0.7    | 0.5913 | 5.8    | 2.088          |
| 4/21/2019 13:10 | 0.8    | -0.4    | 4.0839 | -0.725  | 0.5913 | 5.78   | 2.0996         |
| 4/21/2019 13:11 | 0.8    | 0.3167  | 4.279  | -0.2583 | 0.5913 | 5.7909 | 2.0822         |
| 4/21/2019 13:12 | 0.7333 | 0.0167  | 4.2144 | -0.5667 | 0.5913 | 5.8    | 2.0728         |
| 4/21/2019 13:13 | 0.7083 | -0.2    | 4.1085 | -0.2583 | 0.5913 | 5.8    | 2.0698         |
| 4/21/2019 13:14 | 0.7417 | -0.45   | 4.226  | 0.3333  | 0.5913 | 5.8    | 2.0779         |
| 4/21/2019 13:15 | 0.7667 | -0.4667 | 4.2046 | -0.325  | 0.5913 | 5.8    | 2.0691         |
| 4/21/2019 13:16 | 0.7833 | -0.5    | 4.1246 | -0.3417 | 0.5913 | 5.89   | 2.0576         |
| 4/21/2019 13:17 | 0.8    | -0.4667 | 3.9812 | -0.1667 | 0.5913 | 5.9    | 2.0547         |
| 4/21/2019 13:18 | 0.8583 | -0.15   | 4.2755 | -0.45   | 0.5913 | 5.9    | 0.1164 2.0667  |
| 4/21/2019 13:19 | 0.9    | -0.15   | 4.1809 | -0.1083 | 0.5913 | 5.9    | 0.1021 2.9154  |
| 4/21/2019 13:20 | 0.9    | -0.0667 | 3.9652 | -0.225  | 0.5913 | 5.9    | 0.1048 3.8945  |
| 4/21/2019 13:21 | 0.9    | -0.5167 | 3.8711 | 0.1417  | 0.5913 | 5.9    | 0.1118 0.248   |
| 4/21/2019 13:22 | 0.875  | -0.35   | 3.7779 | -0.4333 | 0.5913 | 5.9    | 0.0943 -0.0474 |
| 4/21/2019 13:23 | 0.8    | 0.1     | 4.1517 | -0.7667 | 0.5913 | 5.9    | 0.1033 -0.0723 |

|                 |        |         |        |         |        |        |        |         |
|-----------------|--------|---------|--------|---------|--------|--------|--------|---------|
| 4/21/2019 13:24 | 0.8    | 0.05    | 4.2574 | -0.7083 | 0.5913 | 5.9    | 0.104  | -0.0575 |
| 4/21/2019 13:25 | 0.8    | -0.2    | 4.0923 | -0.175  | 0.5913 | 5.8727 | 0.0971 | -0.0575 |
| 4/21/2019 13:26 | 0.8    | -0.3167 | 4.0023 | -0.2    | 0.5913 | 5.8    | 0.1066 | -0.053  |
| 4/21/2019 13:27 | 0.7833 | 0.7167  | 4.1082 | -0.375  | 0.5913 | 5.8    | 0.1017 | 1.1751  |
| 4/21/2019 13:28 | 0.7917 | 0.05    | 4.2025 | -0.4667 | 0.5913 | 5.8    | 0.1153 | 20.5235 |
| 4/21/2019 13:29 | 0.75   | -0.0667 | 4.1476 | -0.2083 | 0.5913 | 5.75   | 0.1084 | 28.42   |
| 4/21/2019 13:30 | 0.7833 | 0.0167  | 4.2106 | 0.05    | 0.5913 | 5.7    | 0.1064 | 28.6367 |
| 4/21/2019 13:31 | 0.775  | 0.2167  | 4.0931 | -0.0083 | 0.5913 | 5.7182 | 0.116  | 28.7117 |
| 4/21/2019 13:32 | 0.7333 | 0.2667  | 4.2638 | -0.5833 | 0.5913 | 5.7    | 0.0986 | 28.7533 |
| 4/21/2019 13:33 | 0.7417 | -0.1167 | 3.962  | -0.1917 | 0.5913 | 5.7    | 0.1114 | 28.79   |
| 4/21/2019 13:34 | 0.7    | -0.3833 | 3.9435 | -0.4417 | 0.5913 | 5.7    | 0.1113 | 28.7775 |
| 4/21/2019 13:35 | 0.7    | -0.3    | 4.1068 | -0.375  | 0.5913 | 5.7    | 0.1105 | 14.5493 |
| 4/21/2019 13:36 | 0.7    | 0.05    | 4.09   | -0.2083 | 0.5913 | 5.7    | 0.1114 | 2.0965  |
| 4/21/2019 13:37 | 0.6833 | 0.3167  | 3.7337 | 0.125   | 0.5913 | 5.7    | 0.105  | 2.0986  |
| 4/21/2019 13:38 | 0.7    | 0.1333  | 4.1483 | -0.75   | 0.5913 | 5.7727 | 0.1158 | 2.0943  |
| 4/21/2019 13:39 | 0.7    | -0.0333 | 4.1582 | -0.2167 | 0.5913 | 5.79   | 0.1153 | 2.0768  |
| 4/21/2019 13:40 | 0.7083 | -0.5333 | 4.0813 | -0.375  | 0.5913 | 5.7    | 0.109  | 2.0738  |
| 4/21/2019 13:41 | 0.7167 | 0.1     | 3.9097 | -0.225  | 0.5913 | 5.7    | 0.118  | 2.0708  |
| 4/21/2019 13:42 | 0.7    | 0.1333  | 4.1594 | -0.0333 | 0.5913 | 5.7    | 0.1046 | 2.0701  |
| 4/21/2019 13:43 | 0.6833 | -0.6333 | 3.9263 | -0.0833 | 0.5913 | 5.6545 | 0.1181 | 2.0826  |
| 4/21/2019 13:44 | 0.6917 | 0.5833  | 3.8847 | -0.0583 | 0.5913 | 5.6    | 0.1125 | 2.0853  |
| 4/21/2019 13:45 | 0.7    | 0.3667  | 4.2217 | -0.1167 | 0.5913 | 5.6545 | 0.1139 | 2.1072  |
| 4/21/2019 13:46 | 0.7083 | 0.2333  | 4.247  | -0.0167 | 0.5913 | 5.6    | 0.121  | 2.1057  |
| 4/21/2019 13:47 | 0.8    | -0.5667 | 3.9237 | -0.1417 | 0.5913 | 5.6    | 0.1081 | 2.1063  |
| 4/21/2019 13:48 | 0.8    | 0.1333  | 4.274  | -0.4583 | 0.5913 | 5.6    | 0.1188 | 2.0953  |
| 4/21/2019 13:49 | 0.8    | 0.1833  | 4.1829 | -0.2083 | 0.5913 | 5.6    | 0.1152 | 2.0722  |
| 4/21/2019 13:50 | 0.7455 | -0.75   | 3.7503 | -0.1917 | 0.5913 | 5.6    | 0.1085 | 2.1066  |
| 4/21/2019 13:51 | 0.7583 | -0.3667 | 4.1093 | -0.2917 | 0.5913 | 5.6    | 0.128  | 2.1008  |
| 4/21/2019 13:52 | 0.8    | 0.0333  | 3.7118 | 0.0083  | 0.5913 | 5.6    | 0.1155 | 2.1023  |
| 4/21/2019 13:53 | 0.825  | -0.4167 | 4.256  | 0.025   | 0.5913 | 5.6    | 0.1229 | 2.0968  |
| 4/21/2019 13:54 | 0.8917 | -0.3833 | 4.08   | 0.425   | 0.5913 | 5.6    | 0.1153 | 2.0973  |
| 4/21/2019 13:55 | 0.8    | 0.6     | 4.0442 | 0.0167  | 0.5913 | 5.6    | 0.1216 | 2.0983  |
| 4/21/2019 13:56 | 0.8    | 0.15    | 4.0123 | 0.05    | 0.5913 | 5.6    | 0.1219 | 2.0901  |
| 4/21/2019 13:57 | 0.7417 | -0.0167 | 3.8714 | -0.425  | 0.5913 | 5.6    | 0.1059 | 2.0528  |
| 4/21/2019 13:58 | 0.8    | -1.1667 | 4.0847 | -0.3333 | 0.5913 | 5.6    | 0.1273 | 2.0004  |
| 4/21/2019 13:59 | 0.8    | 0.3333  | 4.0419 | -0.3    | 0.5913 | 5.6    | 0.1063 | 2.0817  |
| 4/21/2019 14:00 | 0.8    | -0.35   | 3.9254 | -0.0417 | 0.5913 | 5.6    | 0.123  | 2.0615  |
| 4/21/2019 14:01 | 0.8    | -0.6667 | 3.6157 | 0.2333  | 0.5913 | 5.6    | 0.1229 | 2.0545  |
| 4/21/2019 14:02 | 0.8    | 0.3667  | 3.8628 | 0.2583  | 0.5913 | 5.6    | 0.1106 | 2.0739  |
| 4/21/2019 14:03 | 0.8    | 0.0833  | 3.6228 | -0.075  | 0.5913 | 5.6    | 0.1294 | 2.0898  |
| 4/21/2019 14:04 | 0.8    | 0.5     | 3.9775 | -0.1917 | 0.5913 | 5.6    | 0.105  | 2.0776  |
| 4/21/2019 14:05 | 0.8    | 0.05    | 3.4325 | 0.5167  | 0.5913 | 5.6    | 0.1179 | 2.0658  |
| 4/21/2019 14:06 | 0.8    | -0.4333 | 4.0233 | 0.45    | 0.5913 | 5.6    | 0.1203 | 2.0543  |
| 4/21/2019 14:07 | 0.8    | -0.15   | 3.984  | -0.6583 | 0.5913 | 5.62   | 0.1158 | 2.0561  |
| 4/21/2019 14:08 | 0.8    | -0.0333 | 3.926  | -0.5833 | 0.5913 | 5.6    | 0.1295 | 2.0706  |
| 4/21/2019 14:09 | 0.7917 | 0.1     | 4.0808 | -0.3    | 0.5913 | 5.66   | 0.1121 | 2.075   |
| 4/21/2019 14:10 | 0.7    | 0.3667  | 3.8047 | -0.5417 | 0.5913 | 5.7    | 0.1247 | 2.0689  |

|                 |        |         |        |         |        |        |        |        |
|-----------------|--------|---------|--------|---------|--------|--------|--------|--------|
| 4/21/2019 14:11 | 0.7    | 0.2833  | 4.0143 | -0.7333 | 0.5913 | 5.7    | 0.1166 | 2.0344 |
| 4/21/2019 14:12 | 0.7    | -0.2    | 4.0803 | -0.0083 | 0.5913 | 5.7    | 0.1206 | 2.0599 |
| 4/21/2019 14:13 | 0.7    | 1.15    | 3.9985 | -0.2333 | 0.5913 | 5.7    | 0.1241 | 2.0659 |
| 4/21/2019 14:14 | 0.7333 | -0.0333 | 3.943  | -0.4    | 0.5913 | 5.7    | 0.1118 | 2.0789 |
| 4/21/2019 14:15 | 0.8    | -0.2    | 3.7987 | 0.15    | 0.5913 | 5.6182 | 0.1245 | 2.0997 |
| 4/21/2019 14:16 | 0.8    | -0.1167 | 3.908  | -0.1    | 0.5913 | 5.6222 | 0.1195 | 2.0909 |
| 4/21/2019 14:17 | 0.8    | 0.15    | 3.8785 | 0.0333  | 0.5913 | 5.65   | 0.1112 | 2.0644 |
| 4/21/2019 14:18 | 0.8    | 0.3     | 4.0453 | -0.3083 | 0.5913 | 5.6    | 0.1267 | 2.0495 |
| 4/21/2019 14:19 | 0.8417 | 0.15    | 3.8208 | 0.1     | 0.5913 | 5.6    | 0.1127 | 2.044  |
| 4/21/2019 14:20 | 0.875  | 0.6167  | 3.8062 | -0.2333 | 0.5913 | 5.6    | 0.1224 | 2.0401 |
| 4/21/2019 14:21 | 0.9    | 0.3833  | 3.8453 | -0.425  | 0.5913 | 5.6    | 0.112  | 2.0503 |
| 4/21/2019 14:22 | 0.8417 | 0.3167  | 3.9435 | -0.3417 | 0.5913 | 5.6    | 0.1264 | 2.057  |
| 4/21/2019 14:23 | 0.8    | 0.1833  | 4.0378 | -0.2583 | 0.5913 | 5.6    | 0.1192 | 2.0485 |
| 4/21/2019 14:24 | 0.8    | 0.1667  | 3.9677 | -0.3667 | 0.5913 | 5.525  | 0.1191 | 2.0623 |
| 4/21/2019 14:25 | 0.7917 | -0.6333 | 3.896  | -0.2083 | 0.5913 | 5.5    | 0.1295 | 2.0458 |
| 4/21/2019 14:26 | 0.8    | -0.2167 | 3.8175 | -0.4333 | 0.5913 | 5.5    | 0.1092 | 2.0235 |
| 4/21/2019 14:27 | 0.725  | 0.25    | 3.8607 | -0.3    | 0.5913 | 5.5    | 0.1257 | 2.054  |
| 4/21/2019 14:28 | 0.7    | -0.2667 | 3.7945 | -0.9833 | 0.5913 | 5.5    | 0.1204 | 2.0359 |
| 4/21/2019 14:29 | 0.6333 | -0.2333 | 3.9755 | -0.6417 | 0.5913 | 5.5545 | 0.1202 | 2.0365 |
| 4/21/2019 14:30 | 0.6    | 0       | 4.0245 | -0.025  | 0.5913 | 5.6    | 0.1293 | 2.0164 |
| 4/21/2019 14:31 | 0.6583 | -0.75   | 3.8183 | 0.2667  | 0.5913 | 5.5545 | 0.1115 | 2.0298 |
| 4/21/2019 14:32 | 0.7    | 0.0333  | 3.9008 | -0.3333 | 0.5913 | 5.6    | 0.1235 | 2.0291 |
| 4/21/2019 14:33 | 0.7    | 0.1833  | 4.0315 | 0.1083  | 0.5913 | 5.6    | 0.1095 | 2.0247 |
| 4/21/2019 14:34 | 0.6917 | -0.6667 | 3.8157 | -0.2167 | 0.5913 | 5.6    | 0.1205 | 2.0393 |
| 4/21/2019 14:35 | 0.625  | 0.25    | 3.9982 | -0.5417 | 0.5913 | 5.6    | 0.1283 | 2.0146 |
| 4/21/2019 14:36 | 0.6    | 0.0667  | 3.9818 | 0.075   | 0.5913 | 5.6    | 0.1085 | 2.0047 |
| 4/21/2019 14:37 | 0.6833 | -0.3833 | 4.0312 | -0.5917 | 0.5913 | 5.6    | 0.1307 | 2.02   |
| 4/21/2019 14:38 | 0.7    | 0.15    | 3.7905 | -0.1167 | 0.5913 | 5.6    | 0.1147 | 2.0573 |
| 4/21/2019 14:39 | 0.7    | 0.0833  | 3.4563 | 0.0167  | 0.5913 | 5.6    | 0.1212 | 2.0405 |
| 4/21/2019 14:40 | 0.7    | 0.4667  | 3.7238 | -0.8417 | 0.5913 | 5.6    | 0.1101 | 2.0458 |
| 4/21/2019 14:41 | 0.7    | 0.4667  | 3.798  | -0.6    | 0.5913 | 5.6    | 0.1199 | 2.0583 |
| 4/21/2019 14:42 | 0.7167 | 0.6167  | 3.2062 | -0.4583 | 0.5913 | 5.5091 | 0.1222 | 2.0526 |
| 4/21/2019 14:43 | 0.8    | -0.1333 | 3.7077 | -0.1    | 0.5913 | 5.5    | 0.1145 | 2.0555 |
| 4/21/2019 14:44 | 0.8    | 0.0333  | 2.948  | -0.1333 | 0.5913 | 5.5    | 0.1256 | 2.0474 |
| 4/21/2019 14:45 | 0.775  | -0.3667 | 3.8992 | -0.225  | 0.5913 | 5.5    | 0.1138 | 2.0417 |
| 4/21/2019 14:46 | 0.7167 | -0.5667 | 3.7605 | 0.2667  | 0.5913 | 5.5    | 0.1176 | 2.0314 |
| 4/21/2019 14:47 | 0.7    | -0.6667 | 3.765  | 0.0417  | 0.5913 | 5.5    | 0.1223 | 2.0425 |
| 4/21/2019 14:48 | 0.725  | 0.6333  | 3.8442 | -0.8667 | 0.5913 | 5.5    | 0.1172 | 2.0348 |
| 4/21/2019 14:49 | 0.7    | -0.1667 | 3.8877 | -0.2917 | 0.5913 | 5.5    | 0.1238 | 2.0547 |
| 4/21/2019 14:50 | 0.7    | 0.3     | 3.653  | -0.0167 | 0.5913 | 5.5    | 0.1102 | 2.0579 |
| 4/21/2019 14:51 | 0.7    | -0.2667 | 3.838  | -0.075  | 0.5913 | 5.5    | 0.1231 | 2.0514 |
| 4/21/2019 14:52 | 0.7333 | 0.25    | 3.9328 | -0.125  | 0.5913 | 5.4818 | 0.1178 | 2.0578 |
| 4/21/2019 14:53 | 0.7417 | 0.2333  | 3.88   | 0.1667  | 0.5913 | 5.4    | 0.1135 | 2.0413 |
| 4/21/2019 14:54 | 0.725  | 0.0167  | 3.8292 | 0.3083  | 0.5913 | 5.47   | 0.1275 | 2.0769 |
| 4/21/2019 14:55 | 0.7333 | 0.4     | 3.687  | 0.3583  | 0.5913 | 5.4833 | 0.114  | 2.0709 |
| 4/21/2019 14:56 | 0.7667 | -0.35   | 3.7873 | -0.3667 | 0.5913 | 5.5    | 0.125  | 2.0642 |
| 4/21/2019 14:57 | 0.8    | -0.6833 | 3.989  | -0.5667 | 0.5913 | 5.5    | 0.1234 | 2.0317 |

|                 |        |         |        |         |        |        |        |        |
|-----------------|--------|---------|--------|---------|--------|--------|--------|--------|
| 4/21/2019 14:58 | 0.8    | -0.4    | 4.0202 | -0.2083 | 0.5913 | 5.5    | 0.1108 | 2.0461 |
| 4/21/2019 14:59 | 0.8    | -0.0333 | 3.9017 | 0.15    | 0.5913 | 5.5    | 0.1274 | 2.0487 |
| 4/21/2019 15:00 | 0.8    | -0.6667 | 4.1227 | -0.2167 | 0.5913 | 5.5    | 0.1086 | 2.0502 |
| 4/21/2019 15:01 | 0.8    | 0.3167  | 3.9647 | -0.2083 | 0.5913 | 5.5091 | 0.1239 | 2.0446 |
| 4/21/2019 15:02 | 0.8    | -0.4167 | 3.5642 | -0.175  | 0.5913 | 5.6    | 0.1123 | 2.0405 |
| 4/21/2019 15:03 | 0.8083 | -0.0167 | 3.8657 | -0.0333 | 0.5913 | 5.6    | 0.1229 | 2.0693 |
| 4/21/2019 15:04 | 0.8    | -0.2667 | 4.003  | -0.4167 | 0.5913 | 5.5182 | 0.1167 | 2.0506 |
| 4/21/2019 15:05 | 0.8    | 0.1833  | 3.6385 | 0.1167  | 0.5913 | 5.5727 | 0.1136 | 2.045  |
| 4/21/2019 15:06 | 0.8167 | 0.1833  | 3.951  | 0.0083  | 0.5913 | 5.58   | 0.1278 | 2.0359 |
| 4/21/2019 15:07 | 0.9    | -0.0833 | 3.757  | -0.2167 | 0.5913 | 5.6    | 0.1144 | 2.0408 |
| 4/21/2019 15:08 | 0.9    | -0.1833 | 3.954  | -0.2417 | 0.5913 | 5.5667 | 0.1272 | 2.0153 |
| 4/21/2019 15:09 | 0.8917 | -0.1833 | 4.1668 | 0.2167  | 0.5913 | 5.5    | 0.109  | 2.0111 |
| 4/21/2019 15:10 | 0.8083 | -0.1167 | 3.7335 | 0.2333  | 0.5913 | 5.5    | 0.1168 | 2.0314 |
| 4/21/2019 15:11 | 0.8    | 0.2833  | 3.82   | -0.15   | 0.5913 | 5.5    | 0.1208 | 2.0391 |
| 4/21/2019 15:12 | 0.8    | 0.0167  | 3.7653 | -0.575  | 0.5913 | 5.5    | 0.108  | 2.0269 |
| 4/21/2019 15:13 | 0.8    | -0.4    | 3.788  | 0.0417  | 0.5913 | 5.5    | 0.1247 | 2.0211 |
| 4/21/2019 15:14 | 0.8    | 0.3667  | 3.964  | 0.0833  | 0.5913 | 5.5    | 0.1129 | 2.0292 |
| 4/21/2019 15:15 | 0.8    | 0.1667  | 3.9162 | 0.1083  | 0.5913 | 5.5    | 0.1197 | 2.0336 |
| 4/21/2019 15:16 | 0.8333 | -0.5167 | 3.8298 | 0.0833  | 0.5913 | 5.5    | 0.1226 | 2.0212 |
| 4/21/2019 15:17 | 0.8    | -0.0833 | 3.8465 | 0.45    | 0.5913 | 5.4167 | 0.1128 | 2.0303 |
| 4/21/2019 15:18 | 0.8    | -0.55   | 3.9658 | -0.0167 | 0.5913 | 5.4    | 0.125  | 2.0299 |
| 4/21/2019 15:19 | 0.7917 | -0.0667 | 3.9797 | -0.075  | 0.5913 | 5.3727 | 0.1085 | 2.0313 |
| 4/21/2019 15:20 | 0.8    | 0.3667  | 3.7502 | -0.0417 | 0.5913 | 5.3    | 0.1197 | 2.0075 |
| 4/21/2019 15:21 | 0.8    | 0.4333  | 3.9903 | -0.125  | 0.5913 | 5.3364 | 0.109  | 2.0273 |
| 4/21/2019 15:22 | 0.8    | -0.15   | 3.8235 | -0.375  | 0.5913 | 5.3    | 0.1096 | 2.035  |
| 4/21/2019 15:23 | 0.8    | 0.55    | 3.4193 | -0.2167 | 0.5913 | 5.3    | 0.1241 | 2.0124 |
| 4/21/2019 15:24 | 0.8    | 0.1     | 3.4922 | -0.2083 | 0.5913 | 5.3    | 0.1052 | 2.0166 |
| 4/21/2019 15:25 | 0.775  | -0.3333 | 3.7008 | 0.3667  | 0.5913 | 5.2083 | 0.1194 | 2.0269 |
| 4/21/2019 15:26 | 0.8    | 0.3667  | 3.876  | -0.5167 | 0.5913 | 5.2    | 0.1139 | 2      |
| 4/21/2019 15:27 | 0.8    | -0.95   | 3.8393 | -0.1083 | 0.5913 | 5.2    | 0.1175 | 1.9973 |
| 4/21/2019 15:28 | 0.8    | 0.2667  | 3.6678 | 0.0167  | 0.5913 | 5.2    | 0.1195 | 1.9902 |
| 4/21/2019 15:29 | 0.8833 | -0.4333 | 3.7803 | 0.3333  | 0.5913 | 5.2    | 0.1044 | 2.0111 |
| 4/21/2019 15:30 | 0.9    | -0.0333 | 3.855  | -0.1167 | 0.5913 | 5.2364 | 0.1272 | 2.0321 |
| 4/21/2019 15:31 | 0.9    | 0.2     | 4.018  | 0       | 0.5913 | 5.2833 | 0.117  | 2.0103 |
| 4/21/2019 15:32 | 0.85   | -0.2667 | 3.6297 | -0.3667 | 0.5913 | 5.3    | 0.118  | 1.9834 |
| 4/21/2019 15:33 | 0.8    | 0.1667  | 3.7251 | -0.1167 | 0.5913 | 5.3    | 0.123  | 2.0169 |
| 4/21/2019 15:34 | 0.8    | 0.0333  | 3.5645 | -0.0583 | 0.5913 | 5.3    | 0.1057 | 2.0403 |
| 4/21/2019 15:35 | 0.7667 | -0.1333 | 3.8477 | -0.4583 | 0.5913 | 5.4    | 0.1236 | 2.0389 |
| 4/21/2019 15:36 | 0.8    | 0.0667  | 3.5114 | -0.3917 | 0.5913 | 5.3111 | 0.1114 | 2.0356 |
| 4/21/2019 15:37 | 0.875  | -0.4    | 3.5648 | -0.6083 | 0.5913 | 5.3    | 0.1164 | 2.017  |
| 4/21/2019 15:38 | 0.9    | -0.2833 | 3.779  | -0.4833 | 0.5913 | 5.3    | 0.1164 | 2.0093 |
| 4/21/2019 15:39 | 0.8083 | -0.0333 | 3.9366 | -0.4    | 0.5913 | 5.3917 | 0.1097 | 2.0018 |
| 4/21/2019 15:40 | 0.8    | -0.1167 | 3.8421 | -0.175  | 0.5913 | 5.4    | 0.1253 | 1.9967 |
| 4/21/2019 15:41 | 0.8    | 0.3167  | 3.9388 | 0.5     | 0.5913 | 5.4    | 0.1029 | 1.9778 |
| 4/21/2019 15:42 | 0.8    | 0.35    | 3.9284 | -0.3167 | 0.5913 | 5.4    | 0.1118 | 1.9802 |
| 4/21/2019 15:43 | 0.8    | -0.4833 | 3.6257 | -0.2667 | 0.5913 | 5.4    | 0.1162 | 1.9803 |
| 4/21/2019 15:44 | 0.8    | 0.6833  | 3.8103 | -0.2    | 0.5913 | 5.3417 | 0.1095 | 2.0169 |

|                 |        |         |        |         |        |        |        |        |
|-----------------|--------|---------|--------|---------|--------|--------|--------|--------|
| 4/21/2019 15:45 | 0.8    | 0.3667  | 3.7303 | -0.0167 | 0.5913 | 5.4    | 0.1226 | 2.0308 |
| 4/21/2019 15:46 | 0.725  | 0.25    | 3.9075 | -0.2917 | 0.5913 | 5.3364 | 0.1158 | 1.9997 |
| 4/21/2019 15:47 | 0.7    | 0.3667  | 3.5508 | 0.1417  | 0.5913 | 5.3    | 0.1145 | 1.9993 |
| 4/21/2019 15:48 | 0.7    | 0.3333  | 3.8004 | -0.2833 | 0.5913 | 5.3    | 0.1175 | 2.0301 |
| 4/21/2019 15:49 | 0.75   | 0.25    | 3.7761 | 0.1667  | 0.5913 | 5.3    | 0.1081 | 2.0484 |
| 4/21/2019 15:50 | 0.725  | -0.0167 | 3.7256 | 0.0667  | 0.5913 | 5.3    | 0.1211 | 2.0144 |
| 4/21/2019 15:51 | 0.7    | 0.2833  | 3.8823 | -0.4583 | 0.5913 | 5.3    | 0.1124 | 2.0254 |
| 4/21/2019 15:52 | 0.7167 | -0.3    | 3.6654 | -0.3833 | 0.5913 | 5.3    | 0.12   | 1.9933 |
| 4/21/2019 15:53 | 0.7667 | -0.2167 | 3.7496 | -0.3583 | 0.5913 | 5.3    | 0.1113 | 2.0014 |
| 4/21/2019 15:54 | 0.7417 | -0.2833 | 3.5973 | -0.15   | 0.5913 | 5.3    | 0.1133 | 2.0089 |
| 4/21/2019 15:55 | 0.7    | 0.2833  | 3.6492 | -0.75   | 0.5913 | 5.3    | 0.1151 | 1.9992 |
| 4/21/2019 15:56 | 0.7    | 0.2     | 3.7248 | -0.775  | 0.5913 | 5.3    | 0.1071 | 2.0264 |
| 4/21/2019 15:57 | 0.7    | 0.8333  | 3.8638 | -0.4333 | 0.5913 | 5.3    | 0.1098 | 2.0555 |
| 4/21/2019 15:58 | 0.7    | -0.2833 | 3.4845 | 0.125   | 0.5913 | 5.2091 | 0.1029 | 2.0187 |
| 4/21/2019 15:59 | 0.7    | -0.1333 | 3.6157 | -0.05   | 0.5913 | 5.2    | 0.1134 | 1.9991 |
| 4/21/2019 16:00 | 0.7    | -0.2    | 3.6323 | -0.475  | 0.5913 | 5.2364 | 0.1133 | 1.9867 |
| 4/21/2019 16:01 | 0.7    | 0.8833  | 3.7239 | 0.2083  | 0.5913 | 5.3    | 0.1098 | 1.9648 |
| 4/21/2019 16:02 | 0.7    | 0.1833  | 3.6789 | 0.1     | 0.5913 | 5.25   | 0.123  | 1.9796 |
| 4/21/2019 16:03 | 0.7    | -0.1167 | 3.5299 | -0.6667 | 0.5913 | 5.2    | 0.1063 | 2.0032 |
| 4/21/2019 16:04 | 0.7    | 0.6     | 3.9271 | -0.2833 | 0.5913 | 5.2    | 0.1133 | 2.0113 |
| 4/21/2019 16:05 | 0.7    | -0.0167 | 3.7592 | -0.2917 | 0.5913 | 5.2    | 0.1157 | 2.0007 |
| 4/21/2019 16:06 | 0.7    | 0.4667  | 3.4978 | -0.275  | 0.5913 | 5.2    | 0.1085 | 2.0026 |
| 4/21/2019 16:07 | 0.7    | -0.1667 | 3.8128 | -0.1583 | 0.5913 | 5.2    | 0.1256 | 2.0009 |
| 4/21/2019 16:08 | 0.7    | -0.1667 | 3.7308 | -0.1917 | 0.5913 | 5.2    | 0.1057 | 1.9831 |
| 4/21/2019 16:09 | 0.775  | -0.3    | 3.3793 | 0.1167  | 0.5913 | 5.2    | 0.1214 | 1.9822 |
| 4/21/2019 16:10 | 0.8    | 0       | 3.79   | -0.5583 | 0.5913 | 5.2636 | 0.1072 | 2.0039 |
| 4/21/2019 16:11 | 0.8    | 0.55    | 3.6375 | -0.25   | 0.5913 | 5.3    | 0.1173 | 1.99   |
| 4/21/2019 16:12 | 0.8    | 0.1667  | 3.6826 | -0.3417 | 0.5913 | 5.3    | 0.1218 | 1.9858 |
| 4/21/2019 16:13 | 0.8    | -0.1167 | 3.9305 | -0.3333 | 0.5913 | 5.2273 | 0.1125 | 1.9995 |
| 4/21/2019 16:14 | 0.7833 | 0.0667  | 3.7895 | 0.0333  | 0.5913 | 5.2    | 0.1213 | 1.99   |
| 4/21/2019 16:15 | 0.7083 | -0.1    | 3.6493 | -0.3    | 0.5913 | 5.2    | 0.0959 | 2.0205 |
| 4/21/2019 16:16 | 0.7667 | 0.3833  | 3.5663 | 0.3333  | 0.5913 | 5.2833 | 0.1215 | 2.0031 |
| 4/21/2019 16:17 | 0.8    | -0.0833 | 3.76   | -0.4417 | 0.5913 | 5.3    | 0.1223 | 1.9973 |
| 4/21/2019 16:18 | 0.8    | -0.1667 | 3.7298 | -0.7333 | 0.5913 | 5.3    | 0.1084 | 2.0063 |
| 4/21/2019 16:19 | 0.7667 | -0.6833 | 3.7228 | 0.1167  | 0.5913 | 5.3    | 0.1263 | 1.9983 |
| 4/21/2019 16:20 | 0.8    | -0.6667 | 3.5819 | -0.25   | 0.5913 | 5.3091 | 0.1101 | 1.9973 |
| 4/21/2019 16:21 | 0.8    | 0.3833  | 3.5728 | -0.375  | 0.5913 | 5.4    | 0.1219 | 2.001  |
| 4/21/2019 16:22 | 0.8    | -0.15   | 3.6793 | 0.35    | 0.5913 | 5.4    | 0.11   | 1.9633 |
| 4/21/2019 16:23 | 0.8    | 0.05    | 3.5089 | 0.1667  | 0.5913 | 5.4    | 0.107  | 1.9449 |
| 4/21/2019 16:24 | 0.7083 | 0.0667  | 3.694  | -0.3833 | 0.5913 | 5.4    | 0.1159 | 1.9801 |
| 4/21/2019 16:25 | 0.7    | -0.3833 | 3.7123 | -0.2833 | 0.5913 | 5.3667 | 0.1096 | 1.9913 |
| 4/21/2019 16:26 | 0.7    | 0.6167  | 3.7387 | -0.4    | 0.5913 | 5.4    | 0.118  | 2.0133 |
| 4/21/2019 16:27 | 0.7    | 0.0667  | 3.6019 | -0.1917 | 0.5913 | 5.4    | 0.1195 | 1.9883 |
| 4/21/2019 16:28 | 0.7    | 0       | 3.5112 | -0.1083 | 0.5913 | 5.4    | 0.1103 | 2.0194 |
| 4/21/2019 16:29 | 0.7083 | -0.2667 | 3.5486 | -0.3667 | 0.5913 | 5.425  | 0.124  | 1.9809 |
| 4/21/2019 16:30 | 0.8    | 0       | 3.6297 | 0.4     | 0.5913 | 5.4    | 0.1045 | 1.9791 |
| 4/21/2019 16:31 | 0.8    | 0.2667  | 3.7827 | 0.0333  | 0.5913 | 5.4    | 0.1169 | 1.9803 |

|                 |        |         |        |         |        |        |        |        |
|-----------------|--------|---------|--------|---------|--------|--------|--------|--------|
| 4/21/2019 16:32 | 0.8    | -0.3    | 3.949  | 0.0333  | 0.5913 | 5.4    | 0.1062 | 1.988  |
| 4/21/2019 16:33 | 0.8083 | -0.2    | 3.6921 | -0.2417 | 0.5913 | 5.4273 | 0.1115 | 1.989  |
| 4/21/2019 16:34 | 0.8667 | 0.5     | 3.6955 | -0.1667 | 0.5913 | 5.49   | 0.1213 | 1.971  |
| 4/21/2019 16:35 | 0.85   | -0.2667 | 3.4611 | 0.2     | 0.5913 | 5.4    | 0.1024 | 1.9721 |
| 4/21/2019 16:36 | 0.825  | -0.2833 | 3.5198 | -0.05   | 0.5913 | 5.4    | 0.1179 | 1.9968 |
| 4/21/2019 16:37 | 0.8    | -0.15   | 3.6277 | 0.0833  | 0.5913 | 5.48   | 0.1179 | 1.9765 |
| 4/21/2019 16:38 | 0.8083 | 0.1     | 3.6759 | -0.475  | 0.5913 | 5.4818 | 0.1157 | 1.9825 |
| 4/21/2019 16:39 | 0.8    | 0.1667  | 3.5779 | -0.3    | 0.5913 | 5.5    | 0.113  | 1.9683 |
| 4/21/2019 16:40 | 0.8    | -0.2333 | 3.7803 | -0.225  | 0.5913 | 5.4455 | 0.1144 | 1.9765 |
| 4/21/2019 16:41 | 0.8    | -0.5167 | 3.6557 | 0.05    | 0.5913 | 5.4091 | 0.1202 | 1.9953 |
| 4/21/2019 16:42 | 0.9    | 0.0833  | 3.5524 | -0.1    | 0.5913 | 5.4    | 0.1062 | 1.9832 |
| 4/21/2019 16:43 | 0.9083 | 0.25    | 3.8774 | -0.05   | 0.5913 | 5.4    | 0.1183 | 1.969  |
| 4/21/2019 16:44 | 0.9667 | 0.3     | 3.6709 | -0.2    | 0.5913 | 5.3909 | 0.1221 | 1.9823 |
| 4/21/2019 16:45 | 0.9    | 0.0833  | 3.7168 | -0.075  | 0.5913 | 5.3    | 0.1051 | 1.9555 |
| 4/21/2019 16:46 | 0.9333 | -0.1    | 3.782  | -0.35   | 0.5913 | 5.3    | 0.1244 | 1.9546 |
| 4/21/2019 16:47 | 1      | 0.4167  | 3.7548 | -0.0917 | 0.5913 | 5.3    | 0.1112 | 1.9521 |
| 4/21/2019 16:48 | 1      | -0.0333 | 3.5354 | -0.3583 | 0.5913 | 5.3    | 0.121  | 1.9447 |
| 4/21/2019 16:49 | 1      | -0.0667 | 3.7501 | -0.0083 | 0.5913 | 5.3    | 0.1128 | 1.9733 |
| 4/21/2019 16:50 | 0.925  | -0.9333 | 3.7123 | -0.4667 | 0.5913 | 5.3    | 0.1083 | 1.9666 |
| 4/21/2019 16:51 | 0.9    | 0.0167  | 3.6293 | -0.6667 | 0.5913 | 5.3    | 0.1195 | 1.9866 |
| 4/21/2019 16:52 | 0.9417 | -0.55   | 3.7008 | -0.4083 | 0.5913 | 5.3    | 0.1059 | 1.99   |
| 4/21/2019 16:53 | 1      | -0.2167 | 3.9515 | -0.35   | 0.5913 | 5.3    | 0.1152 | 1.9844 |
| 4/21/2019 16:54 | 1      | 0       | 3.8133 | -0.5583 | 0.5913 | 5.3    | 0.1106 | 1.9544 |
| 4/21/2019 16:55 | 1      | 0.2333  | 3.4074 | 0.2     | 0.5913 | 5.3    | 0.1189 | 1.9696 |
| 4/21/2019 16:56 | 0.975  | -0.45   | 3.7168 | -0.9333 | 0.5913 | 5.3    | 0.1196 | 1.997  |
| 4/21/2019 16:57 | 0.9    | -0.5667 | 3.5912 | -0.125  | 0.5913 | 5.3    | 0.1081 | 1.9803 |
| 4/21/2019 16:58 | 0.9    | -0.45   | 3.7587 | -0.2083 | 0.5913 | 5.3    | 0.1238 | 1.9508 |
| 4/21/2019 16:59 | 0.8833 | 0.75    | 3.4984 | -0.3    | 0.5913 | 5.3    | 0.108  | 1.9374 |
| 4/21/2019 17:00 | 0.8    | 0.4167  | 3.799  | -0.2417 | 0.5913 | 5.2545 | 0.1093 | 1.9208 |
| 4/21/2019 17:01 | 0.7333 | -0.3    | 3.6466 | -0.05   | 0.5913 | 5.2    | 0.1181 | 1.9452 |
| 4/21/2019 17:02 | 0.7    | -0.6167 | 3.5443 | 0.0417  | 0.5913 | 5.2    | 0.1131 | 1.9563 |
| 4/21/2019 17:03 | 0.7    | 0       | 3.81   | 0.3667  | 0.5913 | 5.2    | 0.1125 | 1.9468 |
| 4/21/2019 17:04 | 0.7    | 0.0833  | 3.5625 | 0.2667  | 0.5913 | 5.2    | 0.1085 | 1.9571 |
| 4/21/2019 17:05 | 0.7    | 0       | 3.4382 | -0.1    | 0.5913 | 5.2    | 0.1129 | 1.9675 |
| 4/21/2019 17:06 | 0.7    | 0.4833  | 3.4465 | -0.5167 | 0.5913 | 5.2    | 0.1175 | 1.9744 |
| 4/21/2019 17:07 | 0.7083 | 0.5     | 3.7118 | -0.3583 | 0.5913 | 5.2    | 0.1093 | 1.9638 |
| 4/21/2019 17:08 | 0.7917 | -0.4833 | 3.6652 | -0.1833 | 0.5913 | 5.23   | 0.1164 | 1.9482 |
| 4/21/2019 17:09 | 0.725  | -0.3333 | 3.4672 | -0.775  | 0.5913 | 5.3    | 0.1095 | 1.9516 |
| 4/21/2019 17:10 | 0.8    | -0.75   | 3.8415 | -0.4083 | 0.5913 | 5.26   | 0.122  | 1.9844 |
| 4/21/2019 17:11 | 0.7    | -0.45   | 3.5752 | -0.9083 | 0.5913 | 5.2909 | 0.1077 | 1.9998 |
| 4/21/2019 17:12 | 0.7    | 0.1833  | 3.6383 | -0.0417 | 0.5913 | 5.23   | 0.1129 | 1.9851 |
| 4/21/2019 17:13 | 0.7    | -0.3333 | 3.83   | -0.025  | 0.5913 | 5.2818 | 0.1188 | 1.9806 |
| 4/21/2019 17:14 | 0.7083 | -0.5333 | 3.5368 | -0.3167 | 0.5913 | 5.3    | 0.1058 | 1.9889 |
| 4/21/2019 17:15 | 0.725  | -0.2167 | 3.7332 | -0.425  | 0.5913 | 5.3    | 0.1168 | 1.9748 |
| 4/21/2019 17:16 | 0.7    | -0.5833 | 3.5295 | -0.2417 | 0.5913 | 5.3    | 0.1054 | 1.9705 |
| 4/21/2019 17:17 | 0.7    | 0.1333  | 3.6142 | 0.1     | 0.5913 | 5.3    | 0.1168 | 1.9678 |
| 4/21/2019 17:18 | 0.7    | 0.45    | 3.678  | 0.325   | 0.5913 | 5.3    | 0.1175 | 1.9516 |



|                 |        |         |        |         |        |        |        |        |
|-----------------|--------|---------|--------|---------|--------|--------|--------|--------|
| 4/21/2019 17:19 | 0.7333 | 0.2667  | 3.6625 | 0.1083  | 0.5913 | 5.3    | 0.1094 | 1.9442 |
| 4/21/2019 17:20 | 0.7833 | 0.05    | 3.8223 | 0.0833  | 0.5913 | 5.3    | 0.1234 | 1.9466 |
| 4/21/2019 17:21 | 0.8    | -0.1    | 3.7503 | 0.1417  | 0.5913 | 5.3    | 0.1044 | 1.9589 |
| 4/21/2019 17:22 | 0.8333 | 0.6     | 3.5107 | -0.7083 | 0.5913 | 5.3    | 0.1207 | 1.946  |
| 4/21/2019 17:23 | 0.9833 | -0.1833 | 3.5377 | -0.2    | 0.5913 | 5.3    | 0.1113 | 1.9233 |
| 4/21/2019 17:24 | 1      | -0.85   | 3.403  | 0.0417  | 0.5913 | 5.3    | 0.1077 | 1.9479 |
| 4/21/2019 17:25 | 1.0167 | -0.4333 | 4.1118 | -0.15   | 0.5913 | 5.3    | 0.1177 | 1.9603 |
| 4/21/2019 17:26 | 0.9167 | -0.2    | 4.1418 | -0.3833 | 0.5913 | 5.3    | 0.1044 | 1.972  |
| 4/21/2019 17:27 | 0.8583 | 1.1167  | 3.5293 | -0.1167 | 0.5913 | 5.3    | 0.1215 | 1.9553 |
| 4/21/2019 17:28 | 0.8    | 0.6167  | 3.6057 | -0.1417 | 0.5913 | 5.3    | 0.1035 | 1.9525 |
| 4/21/2019 17:29 | 0.825  | 0.05    | 3.5463 | 0.0583  | 0.5913 | 5.3    | 0.1126 | 1.9678 |
| 4/21/2019 17:30 | 0.9    | 0.15    | 3.3363 | 0.225   | 0.5913 | 5.3    | 0.1156 | 1.9781 |
| 4/21/2019 17:31 | 0.9    | -0.4833 | 3.7508 | 0.0833  | 0.5913 | 5.23   | 0.1068 | 1.9628 |
| 4/21/2019 17:32 | 0.8167 | 0.4333  | 3.6307 | -0.3917 | 0.5913 | 5.2    | 0.1154 | 1.9644 |
| 4/21/2019 17:33 | 0.8417 | 0.2     | 3.5578 | -0.1917 | 0.5913 | 5.2    | 0.109  | 1.9838 |
| 4/21/2019 17:34 | 0.9    | 0.75    | 3.718  | -0.025  | 0.5913 | 5.2    | 0.1072 | 1.9255 |
| 4/21/2019 17:35 | 0.9    | -0.1667 | 3.5788 | -0.4083 | 0.5913 | 5.1636 | 0.1202 | 1.9427 |
| 4/21/2019 17:36 | 0.9    | -0.1333 | 3.7715 | -0.2417 | 0.5913 | 5.1    | 0.1034 | 1.9482 |
| 4/21/2019 17:37 | 0.9083 | -0.15   | 3.6648 | 0.0917  | 0.5913 | 5.1    | 0.1192 | 1.9342 |
| 4/21/2019 17:38 | 0.975  | 0.35    | 3.5302 | 0.1167  | 0.5913 | 5.1    | 0.1103 | 1.9253 |
| 4/21/2019 17:39 | 1      | 0.4667  | 3.466  | -0.1583 | 0.5913 | 5.1    | 0.1095 | 1.9566 |
| 4/21/2019 17:40 | 1      | 0.1333  | 3.4577 | -0.2333 | 0.5913 | 5.1    | 0.1101 | 1.9737 |
| 4/21/2019 17:41 | 0.975  | -0.25   | 3.6222 | -0.3    | 0.5913 | 5.1    | 0.1039 | 1.9616 |
| 4/21/2019 17:42 | 0.9917 | -0.2167 | 3.6308 | 0.125   | 0.5913 | 5.0667 | 0.1203 | 1.9841 |
| 4/21/2019 17:43 | 1      | -0.4667 | 3.4205 | -0.2    | 0.5913 | 5      | 0.1044 | 1.9642 |
| 4/21/2019 17:44 | 1      | -0.2    | 3.6748 | -1.075  | 0.5913 | 5.0545 | 0.1189 | 1.9394 |
| 4/21/2019 17:45 | 0.9833 | 0.5     | 3.5702 | -0.0583 | 0.5913 | 5.1    | 0.112  | 1.9463 |
| 4/21/2019 17:46 | 0.8917 | -0.0333 | 3.357  | 0.2     | 0.5913 | 5.1    | 0.1067 | 1.9843 |
| 4/21/2019 17:47 | 0.8    | 0       | 3.7205 | 0.1333  | 0.5913 | 5.1    | 0.1204 | 1.9778 |
| 4/21/2019 17:48 | 0.8    | -0.35   | 3.7548 | -0.7333 | 0.5913 | 5.1    | 0.1056 | 1.9533 |
| 4/21/2019 17:49 | 0.9    | 0.05    | 3.5205 | -0.0667 | 0.5913 | 5.1    | 0.1181 | 1.9572 |
| 4/21/2019 17:50 | 0.9    | 0.5167  | 3.4775 | -0.5083 | 0.5913 | 5.1182 | 0.1059 | 1.9841 |
| 4/21/2019 17:51 | 0.9    | 0.1833  | 3.5437 | -0.2417 | 0.5913 | 5.1455 | 0.1037 | 2.0048 |
| 4/21/2019 17:52 | 0.9    | 0.2167  | 3.5505 | 0       | 0.5913 | 5.2    | 0.1169 | 1.9973 |
| 4/21/2019 17:53 | 0.9    | 0.5167  | 3.5798 | -0.275  | 0.5913 | 5.2    | 0.1063 | 2.0039 |
| 4/21/2019 17:54 | 0.8333 | 0.2333  | 3.6393 | -0.5167 | 0.5913 | 5.2182 | 0.1122 | 2.0188 |
| 4/21/2019 17:55 | 0.8    | 0.6     | 3.7157 | 0.75    | 0.5913 | 5.3    | 0.1084 | 2.0023 |
| 4/21/2019 17:56 | 0.8    | -0.2667 | 3.657  | 0.15    | 0.5913 | 5.3    | 0.1081 | 2.0087 |
| 4/21/2019 17:57 | 0.8    | 0.5167  | 3.4522 | -0.15   | 0.5913 | 5.3    | 0.1108 | 2.0239 |
| 4/21/2019 17:58 | 0.8    | 0.4     | 3.7345 | 0.05    | 0.5913 | 5.3    | 0.0998 | 2.0276 |
| 4/21/2019 17:59 | 0.8    | -0.25   | 3.7018 | -0.15   | 0.5913 | 5.24   | 0.1162 | 2.04   |
| 4/21/2019 18:00 | 0.8    | 0.0833  | 3.6242 | 0.425   | 0.5913 | 5.2    | 0.1138 | 2.0203 |
| 4/21/2019 18:01 | 0.8    | 0.0167  | 3.4527 | -0.6833 | 0.5913 | 5.2    | 0.116  | 2.0541 |
| 4/21/2019 18:02 | 0.8    | 0.3167  | 3.6155 | -0.5667 | 0.5913 | 5.2364 | 0.11   | 2.0722 |
| 4/21/2019 18:03 | 0.8    | -0.0167 | 3.7607 | 0.0667  | 0.5913 | 5.3    | 0.1036 | 2.0856 |
| 4/21/2019 18:04 | 0.8    | 0.3167  | 3.5488 | -0.3833 | 0.5913 | 5.2909 | 0.1207 | 2.0575 |
| 4/21/2019 18:05 | 0.8    | 0.3167  | 3.3618 | -0.5583 | 0.5913 | 5.2    | 0.1106 | 2.0876 |

|                 |        |         |        |         |        |        |        |        |
|-----------------|--------|---------|--------|---------|--------|--------|--------|--------|
| 4/21/2019 18:06 | 0.8    | -0.3    | 3.7412 | -0.1833 | 0.5913 | 5.2    | 0.1163 | 2.103  |
| 4/21/2019 18:07 | 0.8    | 0.15    | 3.4652 | 0.125   | 0.5913 | 5.2    | 0.1108 | 2.0906 |
| 4/21/2019 18:08 | 0.8    | 0.5167  | 3.6063 | -0.3917 | 0.5913 | 5.2    | 0.1075 | 2.0815 |
| 4/21/2019 18:09 | 0.8    | -0.0667 | 3.5735 | -0.8417 | 0.5913 | 5.2    | 0.1139 | 2.0821 |
| 4/21/2019 18:10 | 0.75   | 0.1333  | 3.5465 | 0.0333  | 0.5913 | 5.2    | 0.1043 | 2.1073 |
| 4/21/2019 18:11 | 0.7    | -0.2167 | 3.4645 | -0.2833 | 0.5913 | 5.1167 | 0.1142 | 2.1016 |
| 4/21/2019 18:12 | 0.675  | -0.0667 | 3.4878 | -0.775  | 0.5913 | 5.2    | 0.116  | 2.1046 |
| 4/21/2019 18:13 | 0.6    | -0.2667 | 3.6505 | -0.2417 | 0.5913 | 5.2    | 0.1071 | 2.1332 |
| 4/21/2019 18:14 | 0.6    | 0.0833  | 3.6693 | -0.4083 | 0.5913 | 5.1    | 0.118  | 2.1618 |
| 4/21/2019 18:15 | 0.6    | 0.4667  | 3.7077 | -0.275  | 0.5913 | 5.1    | 0.1067 | 2.142  |
| 4/21/2019 18:16 | 0.6    | 0.6667  | 3.8003 | -0.675  | 0.5913 | 5.1    | 0.1169 | 2.1249 |
| 4/21/2019 18:17 | 0.6    | -0.3167 | 3.4243 | -0.5667 | 0.5913 | 5.1    | 0.1103 | 2.1415 |
| 4/21/2019 18:18 | 0.6417 | 0.2833  | 3.3753 | -0.7    | 0.5913 | 5.1    | 0.1078 | 2.1893 |
| 4/21/2019 18:19 | 0.7    | 0.7     | 3.5162 | -0.1167 | 0.5913 | 5.1    | 0.1234 | 2.2005 |
| 4/21/2019 18:20 | 0.7    | 0.05    | 3.2695 | -0.2833 | 0.5913 | 5.1    | 0.1019 | 2.1958 |
| 4/21/2019 18:21 | 0.7    | 0.55    | 3.4295 | -0.4333 | 0.5913 | 5.0727 | 0.1168 | 2.1654 |
| 4/21/2019 18:22 | 0.7    | -0.0333 | 3.677  | -0.125  | 0.5913 | 5.1    | 0.1066 | 2.1372 |
| 4/21/2019 18:23 | 0.7    | 0.0833  | 3.3808 | -0.4833 | 0.5913 | 5.1    | 0.1125 | 2.1629 |
| 4/21/2019 18:24 | 0.7    | -0.1167 | 3.4712 | -0.5583 | 0.5913 | 5.1    | 0.1179 | 2.1832 |
| 4/21/2019 18:25 | 0.7    | -0.7667 | 3.4468 | -0.7083 | 0.5913 | 5.1    | 0.1001 | 2.1959 |
| 4/21/2019 18:26 | 0.7417 | -0.4    | 3.3173 | -0.025  | 0.5913 | 5.1455 | 0.1173 | 2.195  |
| 4/21/2019 18:27 | 0.8    | 0.35    | 3.5777 | -0.2167 | 0.5913 | 5.11   | 0.1113 | 2.1952 |
| 4/21/2019 18:28 | 0.8    | -0.1833 | 2.9918 | -0.1417 | 0.5913 | 5.1333 | 0.1136 | 2.2023 |
| 4/21/2019 18:29 | 0.8    | -0.25   | 3.6873 | -0.0083 | 0.5913 | 5.1455 | 0.1217 | 2.2136 |
| 4/21/2019 18:30 | 0.7917 | 0.3     | 3.7192 | -0.3667 | 0.5913 | 5.1364 | 0.1092 | 2.2263 |
| 4/21/2019 18:31 | 0.8167 | 0.05    | 3.4707 | -0.3167 | 0.5913 | 5.14   | 0.121  | 2.2466 |
| 4/21/2019 18:32 | 0.9    | 0.0167  | 3.735  | 0.1917  | 0.5913 | 5.2    | 0.1129 | 2.2611 |
| 4/21/2019 18:33 | 0.9    | -0.0333 | 3.415  | 0.5     | 0.5913 | 5.2    | 0.1124 | 2.2474 |
| 4/21/2019 18:34 | 0.9    | -0.45   | 3.3368 | -0.6667 | 0.5913 | 5.2    | 0.1166 | 2.2485 |
| 4/21/2019 18:35 | 0.825  | 0.3167  | 3.6343 | -0.3083 | 0.5913 | 5.2    | 0.1031 | 2.2483 |
| 4/21/2019 18:36 | 0.8    | 0.1833  | 3.6183 | -0.0417 | 0.5913 | 5.2    | 0.1217 | 2.2528 |
| 4/21/2019 18:37 | 0.8    | -0.2333 | 3.4533 | -0.2333 | 0.5913 | 5.1111 | 0.1052 | 2.2501 |
| 4/21/2019 18:38 | 0.8    | -0.4    | 3.4205 | -0.1167 | 0.5913 | 5.1167 | 0.1114 | 2.2309 |
| 4/21/2019 18:39 | 0.8    | -0.3333 | 3.1415 | -0.375  | 0.5913 | 5.2    | 0.1178 | 2.2344 |
| 4/21/2019 18:40 | 0.8    | 0.3667  | 3.3733 | -0.625  | 0.5913 | 5.2    | 0.1058 | 2.2905 |
| 4/21/2019 18:41 | 0.825  | -0.7833 | 3.6796 | -0.5083 | 0.5913 | 5.2    | 0.1168 | 2.2938 |
| 4/21/2019 18:42 | 0.9    | 0.0167  | 3.5036 | -0.4333 | 0.5913 | 5.2182 | 0.1097 | 2.2515 |
| 4/21/2019 18:43 | 0.8417 | -0.2333 | 3.6395 | 0.0417  | 0.5913 | 5.2727 | 0.1146 | ---    |
| 4/21/2019 18:44 | 0.8417 | -0.55   | 3.5247 | -0.7417 | 0.5913 | 5.3    | 0.119  | ---    |
| 4/21/2019 18:45 | 0.8    | 0.3667  | 3.435  | -0.3083 | 0.5913 | 5.3    | 0.1058 | ---    |
| 4/21/2019 18:46 | 0.8    | -0.3667 | 3.6748 | -0.4417 | 0.5913 | 5.3    | 0.1203 | ---    |
| 4/21/2019 18:47 | 0.825  | 0.3833  | 3.311  | -0.4    | 0.5913 | 5.3    | 0.115  | ---    |
| 4/21/2019 18:48 | 0.8    | -0.3167 | 3.4135 | -0.3417 | 0.5913 | 5.3818 | 0.1201 | ---    |
| 4/21/2019 18:49 | 0.8    | -0.1333 | 3.6522 | 0       | 0.5913 | 5.4    | 0.1094 | ---    |
| 4/21/2019 18:50 | 0.7917 | -0.1    | 3.3899 | -0.075  | 0.5913 | 5.4    | 0.1088 | ---    |
| 4/21/2019 18:51 | 0.8    | -0.5167 | 3.3958 | -0.4333 | 0.5913 | 5.4    | 0.1213 | ---    |
| 4/21/2019 18:52 | 0.7333 | 0.3     | 3.5424 | -0.575  | 0.5913 | 5.4    | 0.1125 | ---    |

|                 |        |         |        |         |        |        |        |     |
|-----------------|--------|---------|--------|---------|--------|--------|--------|-----|
| 4/21/2019 18:53 | 0.7917 | -0.2667 | 3.5007 | 0.325   | 0.5913 | 5.4    | 0.1146 | --- |
| 4/21/2019 18:54 | 0.85   | -0.0833 | 3.6926 | -0.1    | 0.5913 | 5.3545 | 0.1095 | --- |
| 4/21/2019 18:55 | 0.9    | 0.25    | 3.3981 | 0.0417  | 0.5913 | 5.4    | 0.1105 | --- |
| 4/21/2019 18:56 | 0.9    | -0.2667 | 3.5349 | -0.3167 | 0.5913 | 5.4    | 0.1132 | --- |
| 4/21/2019 18:57 | 0.8    | 0.3167  | 3.3801 | 0.025   | 0.5913 | 5.4    | 0.1074 | --- |
| 4/21/2019 18:58 | 0.8    | -0.55   | 3.4755 | 0.0083  | 0.5913 | 5.4    | 0.1226 | --- |
| 4/21/2019 18:59 | 0.7917 | -0.3    | 3.5773 | -0.2083 | 0.5913 | 5.4    | 0.1096 | --- |
| 4/21/2019 19:00 | 0.7667 | 0.1333  | 3.729  | 0.35    | 0.5913 | 5.4    | 0.1143 | --- |
| 4/21/2019 19:01 | 0.8    | -0.3167 | 3.2715 | 0.0167  | 0.5913 | 5.4    | 0.116  | --- |
| 4/21/2019 19:02 | 0.8    | -0.5167 | 3.2907 | 0.125   | 0.5913 | 5.4    | 0.1113 | --- |
| 4/21/2019 19:03 | 0.8    | -0.2833 | 3.5194 | 0.2667  | 0.5913 | 5.4    | 0.1217 | --- |
| 4/21/2019 19:04 | 0.8    | 0.4833  | 3.5649 | -0.225  | 0.5913 | 5.4    | 0.1071 | --- |
| 4/21/2019 19:05 | 0.8    | -0.4333 | 3.396  | -0.25   | 0.5913 | 5.4    | 0.1157 | --- |
| 4/21/2019 19:06 | 0.825  | 0.4     | 3.4555 | -0.2167 | 0.5913 | 5.4    | 0.1113 | --- |
| 4/21/2019 19:07 | 0.8917 | -0.2    | 3.6901 | -0.5667 | 0.5913 | 5.4    | 0.1092 | --- |
| 4/21/2019 19:08 | 0.8333 | -0.0333 | 3.6013 | -0.55   | 0.5913 | 5.31   | 0.1209 | --- |
| 4/21/2019 19:09 | 0.8    | 0.45    | 3.771  | -0.4333 | 0.5913 | 5.3    | 0.1068 | --- |
| 4/21/2019 19:10 | 0.8    | 0.1333  | 3.5516 | -0.5667 | 0.5913 | 5.3    | 0.1168 | --- |
| 4/21/2019 19:11 | 0.8    | 0.7833  | 3.375  | 0.1167  | 0.5913 | 5.3    | 0.1177 | --- |
| 4/21/2019 19:12 | 0.8    | -0.25   | 3.5813 | -0.575  | 0.5913 | 5.2417 | 0.1077 | --- |
| 4/21/2019 19:13 | 0.7083 | 0.55    | 3.7472 | 0.2417  | 0.5913 | 5.3    | 0.1197 | --- |
| 4/21/2019 19:14 | 0.7    | -0.4833 | 3.2999 | -0.6083 | 0.5913 | 5.25   | 0.1086 | --- |
| 4/21/2019 19:15 | 0.7    | -0.25   | 3.5323 | -0.4    | 0.5913 | 5.2    | 0.1178 | --- |
| 4/21/2019 19:16 | 0.7    | 0.45    | 3.5208 | -0.2583 | 0.5913 | 5.2    | 0.1102 | --- |
| 4/21/2019 19:17 | 0.7    | -0.1333 | 3.5608 | -0.0583 | 0.5913 | 5.2    | 0.1177 | --- |
| 4/21/2019 19:18 | 0.7    | 0.7167  | 3.23   | -0.15   | 0.5913 | 5.2    | 0.1154 | --- |
| 4/21/2019 19:19 | 0.7    | -0.15   | 3.6205 | 0.0583  | 0.5913 | 5.2    | 0.1087 | --- |
| 4/21/2019 19:20 | 0.7417 | -0.0667 | 3.5869 | -0.375  | 0.5913 | 5.2083 | 0.1238 | --- |
| 4/21/2019 19:21 | 0.8    | -0.3833 | 3.6753 | -0.9583 | 0.5913 | 5.3    | 0.1071 | --- |
| 4/21/2019 19:22 | 0.8167 | 0.35    | 3.6387 | -0.15   | 0.5913 | 5.2083 | 0.1095 | --- |
| 4/21/2019 19:23 | 0.8833 | 0.0667  | 3.5428 | -0.2917 | 0.5913 | 5.2182 | 0.1203 | --- |
| 4/21/2019 19:24 | 0.8333 | 0.0333  | 3.2914 | -0.2167 | 0.5913 | 5.2583 | 0.0971 | --- |
| 4/21/2019 19:25 | 0.8583 | 0.1667  | 3.4722 | -0.05   | 0.5913 | 5.2    | 0.1183 | --- |
| 4/21/2019 19:26 | 0.8417 | 0.1     | 3.4308 | 0.15    | 0.5913 | 5.2    | 0.1053 | --- |
| 4/21/2019 19:27 | 0.9    | -0.3333 | 3.5553 | 0.0583  | 0.5913 | 5.2    | 0.1161 | --- |
| 4/21/2019 19:28 | 0.9    | 0.1667  | 3.344  | -0.6    | 0.5913 | 5.2    | 0.1223 | --- |
| 4/21/2019 19:29 | 0.9    | -0.3833 | 3.5546 | -0.0167 | 0.5913 | 5.2    | 0.1064 | --- |
| 4/21/2019 19:30 | 0.8583 | 0.1667  | 3.3756 | 0.2333  | 0.5913 | 5.2    | 0.1252 | --- |
| 4/21/2019 19:31 | 0.875  | 0.1     | 3.5156 | -0.4167 | 0.5913 | 5.2    | 0.1046 | --- |
| 4/21/2019 19:32 | 0.8667 | 0.7167  | 3.6013 | -0.0667 | 0.5913 | 5.25   | 0.1163 | --- |
| 4/21/2019 19:33 | 0.8917 | 0.3667  | 3.8527 | -0.6167 | 0.5913 | 5.2    | 0.1193 | --- |
| 4/21/2019 19:34 | 0.9    | -0.45   | 3.7893 | -0.6583 | 0.5913 | 5.2    | 0.1072 | --- |
| 4/21/2019 19:35 | 0.9    | 0.6167  | 3.3988 | -0.5833 | 0.5913 | 5.2    | 0.1173 | --- |
| 4/21/2019 19:36 | 0.85   | 0.85    | 3.5503 | -0.4667 | 0.5913 | 5.2    | 0.1053 | --- |
| 4/21/2019 19:37 | 0.8    | -0.1    | 3.1893 | -0.425  | 0.5913 | 5.2727 | 0.1127 | --- |
| 4/21/2019 19:38 | 0.8    | -0.6167 | 3.4373 | -0.4333 | 0.5913 | 5.3    | 0.1148 | --- |
| 4/21/2019 19:39 | 0.7917 | -0.0167 | 3.4062 | -0.3833 | 0.5913 | 5.3    | 0.1054 | --- |

|                 |        |         |        |         |        |        |        |     |
|-----------------|--------|---------|--------|---------|--------|--------|--------|-----|
| 4/21/2019 19:40 | 0.8    | 0.0833  | 3.2593 | -0.3083 | 0.5913 | 5.3    | 0.1164 | --- |
| 4/21/2019 19:41 | 0.8    | -0.1167 | 3.3711 | -0.2333 | 0.5913 | 5.3    | 0.1074 | --- |
| 4/21/2019 19:42 | 0.7417 | 0.8     | 3.3307 | -0.2667 | 0.5913 | 5.3    | 0.1147 | --- |
| 4/21/2019 19:43 | 0.7    | -0.1167 | 3.7821 | 0.3083  | 0.5913 | 5.3    | 0.1131 | --- |
| 4/21/2019 19:44 | 0.7    | 0.2     | 3.4891 | -0.2833 | 0.5913 | 5.2333 | 0.1144 | --- |
| 4/21/2019 19:45 | 0.7    | 0.4167  | 3.3086 | 0.0083  | 0.5913 | 5.2    | 0.1129 | --- |
| 4/21/2019 19:46 | 0.7    | -0.1167 | 3.4708 | 0.1667  | 0.5913 | 5.2    | 0.1012 | --- |
| 4/21/2019 19:47 | 0.7    | 0.2833  | 3.371  | -0.2    | 0.5913 | 5.2727 | 0.1192 | --- |
| 4/21/2019 19:48 | 0.7583 | -0.1833 | 3.5789 | -0.1333 | 0.5913 | 5.3    | 0.1095 | --- |
| 4/21/2019 19:49 | 0.7917 | -0.3    | 3.3434 | -0.2    | 0.5913 | 5.2    | 0.1111 | --- |
| 4/21/2019 19:50 | 0.8    | 0.2     | 3.5599 | 0.1083  | 0.5913 | 5.2    | 0.1209 | --- |
| 4/21/2019 19:51 | 0.8    | 0.3667  | 3.3406 | 0.15    | 0.5913 | 5.2    | 0.1096 | --- |
| 4/21/2019 19:52 | 0.8    | 0.1     | 3.2058 | 0.0833  | 0.5913 | 5.2    | 0.1163 | --- |
| 4/21/2019 19:53 | 0.8    | -0.5    | 3.179  | -0.0167 | 0.5913 | 5.2    | 0.1008 | --- |
| 4/21/2019 19:54 | 0.8    | 0.65    | 3.3892 | -0.1    | 0.5913 | 5.2    | 0.1178 | --- |
| 4/21/2019 19:55 | 0.8    | 0.1667  | 3.5818 | -0.3583 | 0.5913 | 5.2333 | 0.1079 | --- |
| 4/21/2019 19:56 | 0.8    | -0.4333 | 3.3018 | -0.0917 | 0.5913 | 5.26   | 0.1088 | --- |
| 4/21/2019 19:57 | 0.8    | -0.1333 | 3.4467 | 0.2667  | 0.5913 | 5.3    | 0.1189 | --- |
| 4/21/2019 19:58 | 0.8    | 0.05    | 3.6539 | 0.1     | 0.5913 | 5.3    | 0.1015 | --- |
| 4/21/2019 19:59 | 0.775  | 0.3667  | 3.3112 | -0.2333 | 0.5913 | 5.3    | 0.1211 | --- |
| 4/21/2019 20:00 | 0.7417 | 0.0667  | 3.3207 | 0.0333  | 0.5913 | 5.3    | 0.1086 | --- |
| 4/21/2019 20:01 | 0.8    | 0.6667  | 3.3137 | 0.2417  | 0.5913 | 5.2818 | 0.1155 | --- |
| 4/21/2019 20:02 | 0.75   | 0.3167  | 3.3616 | 0.3     | 0.5913 | 5.2273 | 0.1182 | --- |
| 4/21/2019 20:03 | 0.7667 | 0.15    | 3.2342 | 0.15    | 0.5913 | 5.2909 | 0.1085 | --- |
| 4/21/2019 20:04 | 0.7167 | -0.45   | 3.5    | -0.0833 | 0.5913 | 5.2    | 0.1214 | --- |
| 4/21/2019 20:05 | 0.7417 | -0.25   | 3.3563 | -0.5917 | 0.5913 | 5.2    | 0.1086 | --- |
| 4/21/2019 20:06 | 0.7    | 0.2     | 3.3985 | -0.125  | 0.5913 | 5.2    | 0.1153 | --- |
| 4/21/2019 20:07 | 0.7    | 0.5667  | 3.4677 | -0.2333 | 0.5913 | 5.2    | 0.1196 | --- |
| 4/21/2019 20:08 | 0.7    | 0.55    | 3.1952 | -0.4833 | 0.5913 | 5.1545 | 0.1115 | --- |
| 4/21/2019 20:09 | 0.7    | -0.6333 | 3.3615 | -0.2667 | 0.5913 | 5.1    | 0.1164 | --- |
| 4/21/2019 20:10 | 0.7    | 0.35    | 3.3107 | -0.675  | 0.5913 | 5.0455 | 0.11   | --- |
| 4/21/2019 20:11 | 0.675  | -0.05   | 3.0753 | -0.4333 | 0.5913 | 5      | 0.1182 | --- |
| 4/21/2019 20:12 | 0.6417 | -0.3167 | 3.39   | -0.7    | 0.5913 | 5      | 0.1141 | --- |
| 4/21/2019 20:13 | 0.65   | -0.5    | 3.0212 | 0.075   | 0.5913 | 5      | 0.109  | --- |
| 4/21/2019 20:14 | 0.6    | 0.55    | 3.2572 | 0.1417  | 0.5913 | 5      | 0.1242 | --- |
| 4/21/2019 20:15 | 0.6    | -0.1333 | 3.2213 | 0.075   | 0.5913 | 5      | 0.099  | --- |
| 4/21/2019 20:16 | 0.6    | -0.3333 | 3.3092 | -0.2583 | 0.5913 | 5      | 0.1168 | --- |
| 4/21/2019 20:17 | 0.6    | -0.6667 | 3.3045 | 0.2417  | 0.5913 | 4.9727 | 0.1088 | --- |
| 4/21/2019 20:18 | 0.6    | -0.3833 | 3.5285 | 0.25    | 0.5913 | 4.9727 | 0.1086 | --- |
| 4/21/2019 20:19 | 0.6333 | 0.0167  | 3.312  | -0.2583 | 0.5913 | 5      | 0.1185 | --- |
| 4/21/2019 20:20 | 0.6167 | -0.5333 | 3.2622 | -0.1833 | 0.5913 | 5      | 0.1051 | --- |
| 4/21/2019 20:21 | 0.7    | -0.1167 | 3.1008 | -0.0083 | 0.5913 | 5      | 0.1182 | --- |
| 4/21/2019 20:22 | 0.7    | -0.15   | 3.28   | -0.5917 | 0.5913 | 5      | 0.1112 | --- |
| 4/21/2019 20:23 | 0.7    | -0.5    | 3.169  | -0.3917 | 0.5913 | 5      | 0.1091 | --- |
| 4/21/2019 20:24 | 0.6    | 0.0667  | 3.1287 | -0.6833 | 0.5913 | 5      | 0.1184 | --- |
| 4/21/2019 20:25 | 0.6    | -0.2667 | 3.1405 | -0.675  | 0.5913 | 5      | 0.1089 | --- |
| 4/21/2019 20:26 | 0.6    | -0.3667 | 3.2155 | -0.5333 | 0.5913 | 5.0818 | 0.1217 | --- |

|                 |        |         |        |         |        |        |        |         |
|-----------------|--------|---------|--------|---------|--------|--------|--------|---------|
| 4/21/2019 20:27 | 0.5917 | 0.0167  | 3.275  | -0.5333 | 0.5913 | 5.1    | 0.1095 | ---     |
| 4/21/2019 20:28 | 0.6    | -0.6167 | 3.2483 | -0.85   | 0.5913 | 5.1455 | 0.1131 | ---     |
| 4/21/2019 20:29 | 0.6583 | -0.25   | 3.3253 | -0.85   | 0.5913 | 5.2    | 0.1142 | ---     |
| 4/21/2019 20:30 | 0.7    | 0.1833  | 3.1102 | -0.2167 | 0.5913 | 5.2    | 0.1042 | ---     |
| 4/21/2019 20:31 | 0.7    | 0.35    | 3.1143 | -0.3417 | 0.5913 | 5.2    | 0.1181 | ---     |
| 4/21/2019 20:32 | 0.7    | -0.2667 | 3.1518 | -0.2083 | 0.5913 | 5.2    | 0.1141 | ---     |
| 4/21/2019 20:33 | 0.7    | 0.3167  | 3.0807 | -0.3083 | 0.5913 | 5.2636 | 0.1208 | ---     |
| 4/21/2019 20:34 | 0.7583 | -0.35   | 3.1345 | 0.075   | 0.5913 | 5.3    | 0.1188 | ---     |
| 4/21/2019 20:35 | 0.8    | -0.55   | 3.4482 | -0.1917 | 0.5913 | 5.3    | 0.1064 | -0.7418 |
| 4/21/2019 20:36 | 0.7417 | 0.4     | 3.292  | -0.4    | 0.5913 | 5.3    | 0.1285 | -0.7418 |
| 4/21/2019 20:37 | 0.7    | 0.3167  | 3.0257 | -0.075  | 0.5913 | 5.3    | 0.1093 | -0.7418 |
| 4/21/2019 20:38 | 0.7    | 0.4167  | 3.294  | -0.0417 | 0.5913 | 5.3    | 0.1177 | -0.7418 |
| 4/21/2019 20:39 | 0.7    | -0.2167 | 3.3345 | -0.1083 | 0.5913 | 5.3    | 0.1143 | -0.7418 |
| 4/21/2019 20:40 | 0.7667 | -0.1    | 3.391  | -0.5583 | 0.5913 | 5.2364 | 0.1148 | -0.7418 |
| 4/21/2019 20:41 | 0.7083 | -0.4167 | 2.921  | -0.5583 | 0.5913 | 5.2    | 0.1208 | -0.7418 |
| 4/21/2019 20:42 | 0.7    | -0.05   | 3.2425 | -0.0083 | 0.5913 | 5.2    | 0.1094 | -0.7418 |
| 4/21/2019 20:43 | 0.625  | -0.0333 | 3.2082 | 0.025   | 0.5913 | 5.2    | 0.1213 | -0.7418 |
| 4/21/2019 20:44 | 0.6167 | -0.0667 | 3.2093 | -0.2167 | 0.5913 | 5.2    | 0.1134 | -0.7418 |
| 4/21/2019 20:45 | 0.7    | -0.2333 | 3.2012 | -0.15   | 0.5913 | 5.18   | 0.1167 | -0.7418 |
| 4/21/2019 20:46 | 0.7    | 0.2667  | 3.3007 | -0.3833 | 0.5913 | 5.1    | 0.1261 | -0.7418 |
| 4/21/2019 20:47 | 0.7    | 0.5833  | 3.5548 | 0.2833  | 0.5913 | 5.1    | 0.1151 | -0.7418 |
| 4/21/2019 20:48 | 0.7    | -0.2    | 3.1803 | -0.5583 | 0.5913 | 5.1    | 0.1247 | -0.7418 |
| 4/21/2019 20:49 | 0.7    | 0.0167  | 3.0813 | -0.1583 | 0.5913 | 5.1    | 0.1064 | -0.7418 |
| 4/21/2019 20:50 | 0.7    | 0.6333  | 3.3088 | -0.2    | 0.5913 | 5.1    | 0.1138 | -0.7418 |
| 4/21/2019 20:51 | 0.7    | -0.15   | 2.8915 | -0.9583 | 0.5913 | 5.1    | 0.1207 | -0.7418 |
| 4/21/2019 20:52 | 0.6417 | -0.4333 | 2.8862 | -0.55   | 0.5913 | 5.1    | 0.1066 | -0.7418 |
| 4/21/2019 20:53 | 0.6667 | -0.1    | 2.9647 | -0.0667 | 0.5913 | 5.1    | 0.1185 | -0.7418 |
| 4/21/2019 20:54 | 0.6667 | 0.1667  | 3.1203 | -0.4167 | 0.5913 | 5.1    | 0.1031 | -0.7418 |
| 4/21/2019 20:55 | 0.6083 | -0.5    | 3.0243 | -0.5667 | 0.5913 | 5.1    | 0.1167 | -0.7418 |
| 4/21/2019 20:56 | 0.6    | -0.1333 | 3.0067 | -0.2333 | 0.5913 | 5.1    | 0.114  | -0.7418 |
| 4/21/2019 20:57 | 0.5333 | 0.1833  | 3.125  | -0.0333 | 0.5913 | 5.1    | 0.1081 | -0.7418 |
| 4/21/2019 20:58 | 0.5    | -0.6    | 3.0575 | -0.5167 | 0.5913 | 5.2    | 0.1189 | -0.7418 |
| 4/21/2019 20:59 | 0.575  | 0.2     | 3.2022 | 0.1083  | 0.5913 | 5.2    | 0.1069 | -0.7418 |
| 4/21/2019 21:00 | 0.6333 | 0.1833  | 3.1635 | -0.1167 | 0.5913 | 5.2    | 0.1201 | -0.7418 |
| 4/21/2019 21:01 | 0.7    | -0.3167 | 2.8885 | -0.2833 | 0.5913 | 5.2    | 0.1181 | -0.7418 |
| 4/21/2019 21:02 | 0.7083 | -0.15   | 3.1757 | -0.4    | 0.5913 | 5.2    | 0.1098 | -0.7418 |
| 4/21/2019 21:03 | 0.7    | -0.3667 | 3.0143 | -0.325  | 0.5913 | 5.2    | 0.1159 | -0.7418 |
| 4/21/2019 21:04 | 0.6917 | 0.0333  | 3.0333 | -0.3    | 0.5913 | 5.2    | 0.1097 | -0.7418 |
| 4/21/2019 21:05 | 0.6    | 0.0333  | 2.897  | -0.4583 | 0.5913 | 5.2    | 0.1226 | -0.7418 |
| 4/21/2019 21:06 | 0.6    | -0.2333 | 3.3002 | -0.7    | 0.5913 | 5.2    | 0.1108 | -0.7418 |
| 4/21/2019 21:07 | 0.5083 | -0.15   | 2.9432 | -0.25   | 0.5913 | 5.2    | 0.1104 | -0.7418 |
| 4/21/2019 21:08 | 0.5    | 1.1     | 3.2068 | 0.025   | 0.5913 | 5.16   | 0.1205 | -0.7418 |
| 4/21/2019 21:09 | 0.5    | -0.4167 | 2.8398 | -0.6167 | 0.5913 | 5.2    | 0.107  | -0.7418 |
| 4/21/2019 21:10 | 0.5667 | 0.2333  | 3.2668 | -0.4333 | 0.5913 | 5.2    | 0.1167 | -0.7418 |
| 4/21/2019 21:11 | 0.6    | 0.3667  | 3.0603 | -0.0333 | 0.5913 | 5.2    | 0.1122 | -0.7418 |
| 4/21/2019 21:12 | 0.5583 | -0.15   | 2.9342 | 0.0083  | 0.5913 | 5.1    | 0.1093 | -0.7418 |
| 4/21/2019 21:13 | 0.6    | -0.15   | 3.0052 | -0.3333 | 0.5913 | 5.1    | 0.1204 | -0.7418 |

|                 |        |         |        |         |        |        |        |         |
|-----------------|--------|---------|--------|---------|--------|--------|--------|---------|
| 4/21/2019 21:14 | 0.625  | 0.1167  | 3.0973 | -0.575  | 0.5913 | 5.1    | 0.1097 | -0.7418 |
| 4/21/2019 21:15 | 0.7    | -0.2167 | 3.0425 | -0.6333 | 0.5913 | 5.1    | 0.1202 | -0.7418 |
| 4/21/2019 21:16 | 0.6833 | -0.0167 | 2.986  | -0.1333 | 0.5913 | 5.1    | 0.1119 | -0.7418 |
| 4/21/2019 21:17 | 0.6333 | 0.0167  | 2.8893 | 0.0333  | 0.5913 | 5.0727 | 0.1151 | -0.7418 |
| 4/21/2019 21:18 | 0.6    | -0.7333 | 2.884  | 0.0667  | 0.5913 | 5.02   | 0.1164 | -0.7418 |
| 4/21/2019 21:19 | 0.6    | 0.4333  | 2.9725 | -0.1083 | 0.5913 | 5      | 0.1108 | -0.7418 |
| 4/21/2019 21:20 | 0.525  | 0.3833  | 3.0575 | 0.1667  | 0.5913 | 5      | 0.1209 | -0.7418 |
| 4/21/2019 21:21 | 0.5917 | -0.6667 | 3.0498 | 0.2833  | 0.5913 | 5      | 0.1103 | -0.7418 |
| 4/21/2019 21:22 | 0.5583 | -0.1333 | 3.2765 | -0.1667 | 0.5913 | 5      | 0.1219 | -0.7418 |
| 4/21/2019 21:23 | 0.6    | -0.0667 | 3.1318 | -0.2167 | 0.5913 | 5      | 0.1119 | -0.7418 |
| 4/21/2019 21:24 | 0.6    | -1.0833 | 3.0207 | -0.5917 | 0.5913 | 5      | 0.1134 | -0.7418 |
| 4/21/2019 21:25 | 0.55   | -0.05   | 2.9343 | -0.5917 | 0.5913 | 5      | 0.12   | -0.7418 |
| 4/21/2019 21:26 | 0.5167 | 0.4     | 2.8335 | 0.125   | 0.5913 | 5.0917 | 0.1096 | -0.7418 |
| 4/21/2019 21:27 | 0.5833 | -0.3167 | 2.8052 | -0.25   | 0.5913 | 5.1    | 0.1213 | -0.7418 |
| 4/21/2019 21:28 | 0.6    | 0.2833  | 3.0635 | -0.175  | 0.5913 | 5.1    | 0.1075 | -0.7418 |
| 4/21/2019 21:29 | 0.6167 | 0.7167  | 3.1435 | 0.2     | 0.5913 | 5.1    | 0.1143 | -0.7418 |
| 4/21/2019 21:30 | 0.7    | -0.45   | 2.9215 | -0.2083 | 0.5913 | 5.1    | 0.1175 | -0.7418 |
| 4/21/2019 21:31 | 0.7    | -0.05   | 3.1898 | -0.15   | 0.5913 | 5.06   | 0.113  | -0.7418 |
| 4/21/2019 21:32 | 0.6667 | -0.55   | 2.9836 | -0.3583 | 0.5913 | 5.1    | 0.1184 | -0.7418 |
| 4/21/2019 21:33 | 0.6083 | 0.1833  | 2.8738 | -0.0083 | 0.5913 | 5.1    | 0.108  | -0.7418 |
| 4/21/2019 21:34 | 0.6    | -0.5167 | 2.9423 | -0.15   | 0.5913 | 5.1    | 0.1119 | -0.7418 |
| 4/21/2019 21:35 | 0.6    | 0.4     | 3.1796 | 0.075   | 0.5913 | 5.1    | 0.1183 | -0.7418 |
| 4/21/2019 21:36 | 0.6    | -0.9333 | 2.9903 | -0.0833 | 0.5913 | 5.1    | 0.1144 | -0.7418 |
| 4/21/2019 21:37 | 0.6    | -0.6167 | 3.0837 | -0.3833 | 0.5913 | 5.1    | 0.1219 | -0.7418 |
| 4/21/2019 21:38 | 0.6167 | -0.1    | 3.0658 | -0.6167 | 0.5913 | 5.0667 | 0.1102 | -0.7418 |
| 4/21/2019 21:39 | 0.6583 | -0.5167 | 2.9491 | -0.0333 | 0.5913 | 5      | 0.1211 | -0.7418 |
| 4/21/2019 21:40 | 0.7    | 0.1     | 2.8409 | 0.075   | 0.5913 | 5      | 0.1166 | -0.7418 |
| 4/21/2019 21:41 | 0.7    | 0.5     | 2.9849 | -0.3917 | 0.5913 | 5      | 0.1067 | -0.7418 |
| 4/21/2019 21:42 | 0.7    | 0.25    | 2.7735 | 0.225   | 0.5913 | 5      | 0.1242 | -0.7418 |
| 4/21/2019 21:43 | 0.7    | 0.4333  | 2.724  | -0.325  | 0.5913 | 5      | 0.1033 | -0.7418 |
| 4/21/2019 21:44 | 0.6167 | -0.15   | 2.8542 | 0.0083  | 0.5913 | 5      | 0.1226 | -0.7418 |
| 4/21/2019 21:45 | 0.6    | 0.2     | 2.9396 | -0.25   | 0.5913 | 5.03   | 0.1125 | -0.7418 |
| 4/21/2019 21:46 | 0.5583 | 0.1333  | 3.0013 | -0.6833 | 0.5913 | 5.0583 | 0.1139 | -0.7418 |
| 4/21/2019 21:47 | 0.5    | -0.4    | 3.0256 | -0.625  | 0.5913 | 5      | 0.1204 | -0.7418 |
| 4/21/2019 21:48 | 0.45   | -0.05   | 2.8274 | -0.5833 | 0.5913 | 5.0333 | 0.1067 | -0.7418 |
| 4/21/2019 21:49 | 0.4083 | -0.0667 | 2.9663 | 0.0833  | 0.5913 | 5.1    | 0.1204 | -0.7418 |
| 4/21/2019 21:50 | 0.5    | -0.3833 | 2.7235 | -0.3667 | 0.5913 | 5.1    | 0.1131 | -0.7418 |
| 4/21/2019 21:51 | 0.5833 | -0.1    | 3.0872 | -0.7333 | 0.5913 | 5.1    | 0.1079 | -0.7418 |
| 4/21/2019 21:52 | 0.625  | -0.4667 | 2.8608 | -0.125  | 0.5913 | 5.1    | 0.1256 | -0.7418 |
| 4/21/2019 21:53 | 0.7    | -0.3667 | 2.8574 | -0.475  | 0.5913 | 5.1    | 0.1055 | -0.7418 |
| 4/21/2019 21:54 | 0.6417 | 0.0167  | 2.7902 | -0.6667 | 0.5913 | 5.1    | 0.128  | -0.7418 |
| 4/21/2019 21:55 | 0.6583 | -0.55   | 2.6454 | 0.0917  | 0.5913 | 5.1    | 0.1072 | -0.7418 |
| 4/21/2019 21:56 | 0.6    | 0.15    | 2.6647 | -0.375  | 0.5913 | 5.1    | 0.1151 | -0.7418 |
| 4/21/2019 21:57 | 0.6667 | 0.1667  | 2.5269 | -0.1667 | 0.5913 | 5.1    | 0.1192 | -0.7418 |
| 4/21/2019 21:58 | 0.7    | -0.5    | 2.9279 | -0.625  | 0.5913 | 5.1    | 0.1098 | -0.7418 |
| 4/21/2019 21:59 | 0.7    | -0.0333 | 3.1973 | -0.275  | 0.5913 | 5.1    | 0.1188 | -0.7418 |
| 4/21/2019 22:00 | 0.7    | -0.85   | 2.7754 | -0.5167 | 0.5913 | 5.1    | 0.108  | -0.7418 |

|                 |        |         |        |         |        |        |        |         |
|-----------------|--------|---------|--------|---------|--------|--------|--------|---------|
| 4/21/2019 22:01 | 0.7    | -0.0167 | 3.0228 | -0.6833 | 0.5913 | 5.1    | 0.1138 | -0.7418 |
| 4/21/2019 22:02 | 0.75   | -0.0333 | 2.8533 | 0.1417  | 0.5913 | 5.0083 | 0.1242 | -0.7418 |
| 4/21/2019 22:03 | 0.7167 | 0.3     | 2.8307 | -0.05   | 0.5913 | 5      | 0.1066 | -0.7418 |
| 4/21/2019 22:04 | 0.7    | 0.2167  | 2.7534 | 0.1     | 0.5913 | 5      | 0.1184 | -0.7418 |
| 4/21/2019 22:05 | 0.7    | -0.6167 | 2.6439 | -0.5167 | 0.5913 | 5      | 0.1158 | -0.7418 |
| 4/21/2019 22:06 | 0.7    | 0.1167  | 2.7033 | 0.0583  | 0.5913 | 5      | 0.1117 | -0.7418 |
| 4/21/2019 22:07 | 0.65   | -0.0333 | 2.7112 | 0.2167  | 0.5913 | 5      | 0.1167 | -0.7418 |
| 4/21/2019 22:08 | 0.6    | 0.0333  | 2.7656 | -0.4583 | 0.5913 | 5      | 0.1083 | -0.7418 |
| 4/21/2019 22:09 | 0.6083 | -0.2833 | 2.8538 | -0.3167 | 0.5913 | 5      | 0.1192 | -0.7418 |
| 4/21/2019 22:10 | 0.6917 | 0.1333  | 2.5956 | -0.6083 | 0.5913 | 5      | 0.1078 | -0.7418 |
| 4/21/2019 22:11 | 0.6583 | 0.4167  | 2.6205 | -0.775  | 0.5913 | 5      | 0.1192 | -0.7418 |
| 4/21/2019 22:12 | 0.6583 | -0.3167 | 2.685  | -0.2333 | 0.5913 | 5      | 0.1198 | -0.7418 |
| 4/21/2019 22:13 | 0.65   | -0.5667 | 2.6027 | 0       | 0.5913 | 4.9727 | 0.1094 | -0.7418 |
| 4/21/2019 22:14 | 0.6917 | 0.65    | 2.7833 | -0.2417 | 0.5913 | 4.9    | 0.1239 | -0.7418 |
| 4/21/2019 22:15 | 0.7    | -0.45   | 2.6024 | 0.0333  | 0.5913 | 4.9417 | 0.1093 | -0.7418 |
| 4/21/2019 22:16 | 0.7    | 0.0333  | 2.4204 | -0.2083 | 0.5913 | 4.9    | 0.1211 | -0.7418 |
| 4/21/2019 22:17 | 0.6917 | 0.0333  | 2.7816 | 0.0333  | 0.5913 | 4.975  | 0.1124 | -0.7418 |
| 4/21/2019 22:18 | 0.625  | -0.2667 | 2.6053 | -0.2167 | 0.5913 | 5      | 0.1103 | -0.7418 |
| 4/21/2019 22:19 | 0.6    | -0.2167 | 2.4261 | -0.5083 | 0.5913 | 5      | 0.121  | -0.7418 |
| 4/21/2019 22:20 | 0.6667 | -0.3833 | 2.4953 | -0.375  | 0.5913 | 5      | 0.1087 | -0.7418 |
| 4/21/2019 22:21 | 0.6545 | -0.0833 | 2.8314 | 0.0583  | 0.5913 | 5      | 0.117  | -0.7418 |
| 4/21/2019 22:22 | 0.7    | 0.0167  | 2.6735 | -0.1083 | 0.5913 | 5      | 0.1106 | -0.7418 |
| 4/21/2019 22:23 | 0.7417 | -0.1    | 2.4708 | -0.55   | 0.5913 | 5      | 0.1189 | -0.7418 |
| 4/21/2019 22:24 | 0.8    | -0.0333 | 2.5215 | 0.5333  | 0.5913 | 5      | 0.1263 | -0.7418 |
| 4/21/2019 22:25 | 0.8    | -0.6667 | 2.423  | -0.3833 | 0.5913 | 5      | 0.097  | -0.7418 |
| 4/21/2019 22:26 | 0.8    | -0.05   | 2.4689 | -0.425  | 0.5913 | 5      | 0.1212 | -0.7418 |
| 4/21/2019 22:27 | 0.875  | 0.2167  | 2.4157 | -0.7167 | 0.5913 | 5.0273 | 0.1121 | -0.7418 |
| 4/21/2019 22:28 | 0.8833 | 0.5667  | 2.8441 | -0.3833 | 0.5913 | 5.1    | 0.1066 | -0.7418 |
| 4/21/2019 22:29 | 0.8083 | 0.3167  | 2.7657 | -0.275  | 0.5913 | 5.1    | 0.1161 | -0.7418 |
| 4/21/2019 22:30 | 0.7917 | -0.1    | 2.3759 | -0.8333 | 0.5913 | 5.1    | 0.112  | -0.7418 |
| 4/21/2019 22:31 | 0.7    | -0.3333 | 2.6918 | -0.3917 | 0.5913 | 5.0083 | 0.1299 | -0.7418 |
| 4/21/2019 22:32 | 0.7    | -0.5333 | 2.3992 | -0.4833 | 0.5913 | 5.1    | 0.1071 | -0.7418 |
| 4/21/2019 22:33 | 0.7583 | -0.3833 | 2.8388 | 0.0167  | 0.5913 | 5.1    | 0.1169 | -0.7418 |
| 4/21/2019 22:34 | 0.7417 | -1.15   | 2.7333 | -0.4583 | 0.5913 | 5.1    | 0.1224 | -0.7418 |
| 4/21/2019 22:35 | 0.7    | 0.1167  | 2.6258 | -0.4417 | 0.5913 | 5.1    | 0.1047 | -0.7418 |
| 4/21/2019 22:36 | 0.7    | -0.15   | 2.4909 | -0.4667 | 0.5913 | 5.1    | 0.1246 | -0.7418 |
| 4/21/2019 22:37 | 0.7    | 0.1167  | 2.3708 | -0.2583 | 0.5913 | 5.1    | 0.1074 | -0.7418 |
| 4/21/2019 22:38 | 0.7    | -0.2833 | 2.7582 | -0.6    | 0.5913 | 5.1    | 0.123  | -0.7418 |
| 4/21/2019 22:39 | 0.7    | -0.35   | 2.7497 | -0.025  | 0.5913 | 5.1    | 0.1169 | -0.7418 |
| 4/21/2019 22:40 | 0.7    | -0.3833 | 2.2577 | -0.6167 | 0.5913 | 5.1    | 0.1161 | -0.7418 |
| 4/21/2019 22:41 | 0.6583 | -0.5833 | 2.4878 | -0.575  | 0.5913 | 5.1    | 0.1263 | -0.7418 |
| 4/21/2019 22:42 | 0.6    | 0.0667  | 2.5472 | -0.8083 | 0.5913 | 5.1    | 0.108  | -0.7418 |
| 4/21/2019 22:43 | 0.6    | -0.45   | 2.8151 | 0.025   | 0.5913 | 5.1    | 0.1235 | -0.7418 |
| 4/21/2019 22:44 | 0.6    | -0.9333 | 2.3533 | -0.4083 | 0.5913 | 5.1    | 0.117  | -0.7418 |
| 4/21/2019 22:45 | 0.5833 | 0.1833  | 2.6099 | -0.425  | 0.5913 | 5.0083 | 0.1159 | -0.7418 |
| 4/21/2019 22:46 | 0.5083 | 0.15    | 2.2946 | -0.55   | 0.5913 | 5.1    | 0.125  | -0.7418 |
| 4/21/2019 22:47 | 0.5833 | -0.4167 | 2.6383 | -0.3583 | 0.5913 | 5.1    | 0.108  | -0.7418 |

|                 |        |         |        |         |        |        |        |         |
|-----------------|--------|---------|--------|---------|--------|--------|--------|---------|
| 4/21/2019 22:48 | 0.6    | 0.1833  | 2.483  | -0.1417 | 0.5913 | 5.0818 | 0.1241 | -0.7418 |
| 4/21/2019 22:49 | 0.6    | -0.0833 | 2.7822 | -0.6333 | 0.5913 | 5      | 0.1073 | -0.7418 |
| 4/21/2019 22:50 | 0.6    | -0.4167 | 2.8133 | -0.825  | 0.5913 | 5      | 0.1183 | -0.7418 |
| 4/21/2019 22:51 | 0.6    | -0.2833 | 2.5601 | -0.4917 | 0.5913 | 5      | 0.1184 | -0.7418 |
| 4/21/2019 22:52 | 0.6    | -0.0833 | 2.4193 | -0.45   | 0.5913 | 5      | 0.1064 | -0.7418 |
| 4/21/2019 22:53 | 0.575  | -0.4833 | 2.5009 | -0.3417 | 0.5913 | 5      | 0.1234 | -0.7418 |
| 4/21/2019 22:54 | 0.5667 | -0.3167 | 2.8007 | -0.1583 | 0.5913 | 5      | 0.1092 | -0.7418 |
| 4/21/2019 22:55 | 0.5083 | 0.0167  | 2.5244 | -0.325  | 0.5913 | 5      | 0.1263 | -0.7418 |
| 4/21/2019 22:56 | 0.575  | -0.3333 | 2.6059 | -0.425  | 0.5913 | 4.9455 | 0.1209 | -0.7418 |
| 4/21/2019 22:57 | 0.575  | 0.3333  | 2.7408 | -0.7167 | 0.5913 | 4.9909 | 0.1072 | -0.7418 |
| 4/21/2019 22:58 | 0.5417 | -0.5833 | 2.6238 | -0.7583 | 0.5913 | 4.9167 | 0.1245 | -0.7418 |
| 4/21/2019 22:59 | 0.5    | 0.1667  | 2.5688 | 0.2     | 0.5913 | 5      | 0.1074 | -0.7418 |
| 4/21/2019 23:00 | 0.5    | -0.35   | 2.5602 | -0.2917 | 0.5913 | 5      | 0.1177 | -0.7418 |
| 4/21/2019 23:01 | 0.5583 | -0.25   | 2.4666 | -0.25   | 0.5913 | 5.0091 | 0.1223 | -0.7418 |
| 4/21/2019 23:02 | 0.5833 | -0.35   | 2.3105 | 0.3333  | 0.5913 | 5.1    | 0.1095 | -0.7418 |
| 4/21/2019 23:03 | 0.5917 | 0.2167  | 2.7713 | -0.3917 | 0.5913 | 5.1    | 0.1217 | -0.7418 |
| 4/21/2019 23:04 | 0.5583 | -0.1667 | 2.463  | -0.75   | 0.5913 | 5.1727 | 0.1093 | -0.7418 |
| 4/21/2019 23:05 | 0.5333 | -0.5333 | 2.7607 | 0.1     | 0.5913 | 5.2    | 0.1161 | -0.7418 |
| 4/21/2019 23:06 | 0.5917 | -0.2167 | 2.6707 | -0.4833 | 0.5913 | 5.2    | 0.1107 | -0.7418 |
| 4/21/2019 23:07 | 0.55   | -0.1667 | 2.6753 | -0.3667 | 0.5913 | 5.2    | 0.11   | -0.7418 |
| 4/21/2019 23:08 | 0.6    | -0.4333 | 2.4325 | -0.375  | 0.5913 | 5.2818 | 0.1202 | -0.7418 |
| 4/21/2019 23:09 | 0.6    | -0.3    | 2.8112 | -0.425  | 0.5913 | 5.3417 | 0.1066 | -0.7418 |
| 4/21/2019 23:10 | 0.6    | -0.4167 | 2.5155 | -0.7    | 0.5913 | 5.4    | 0.1265 | -0.7418 |
| 4/21/2019 23:11 | 0.6    | 0.2     | 2.458  | -0.65   | 0.5913 | 5.3364 | 0.1095 | -0.7418 |
| 4/21/2019 23:12 | 0.65   | 0.3667  | 2.7357 | -0.4583 | 0.5913 | 5.3    | 0.1156 | -0.7418 |
| 4/21/2019 23:13 | 0.7    | 0.5     | 2.5208 | -0.1917 | 0.5913 | 5.3    | 0.1192 | -0.7418 |
| 4/21/2019 23:14 | 0.7    | -0.3    | 2.458  | 0.1083  | 0.5913 | 5.2455 | 0.106  | -0.7418 |
| 4/21/2019 23:15 | 0.7    | 0.2833  | 2.7368 | -0.75   | 0.5913 | 5.2    | 0.1249 | -0.7418 |
| 4/21/2019 23:16 | 0.6083 | -0.1333 | 2.7288 | -0.7667 | 0.5913 | 5.2    | 0.1087 | -0.7418 |
| 4/21/2019 23:17 | 0.6417 | -0.2    | 2.5842 | -0.6417 | 0.5913 | 5.2    | 0.1225 | -0.7418 |
| 4/21/2019 23:18 | 0.6917 | -0.15   | 2.4795 | -0.1583 | 0.5913 | 5.1091 | 0.1116 | -0.7418 |
| 4/21/2019 23:19 | 0.7    | -0.15   | 2.2192 | -0.275  | 0.5913 | 5.1    | 0.1046 | -0.7418 |
| 4/21/2019 23:20 | 0.7    | 0.0833  | 2.5165 | -0.4    | 0.5913 | 5.1    | 0.1231 | -0.7418 |
| 4/21/2019 23:21 | 0.6083 | -0.4    | 2.0878 | -0.7833 | 0.5913 | 5.0583 | 0.102  | -0.7418 |
| 4/21/2019 23:22 | 0.6    | 0.3667  | 2.4208 | 0.0417  | 0.5913 | 5      | 0.1162 | -0.7418 |
| 4/21/2019 23:23 | 0.6333 | -0.4333 | 2.457  | -0.3917 | 0.5913 | 5.0636 | 0.116  | -0.7418 |
| 4/21/2019 23:24 | 0.65   | 0.4     | 2.575  | -1.125  | 0.5913 | 5.1    | 0.1099 | -0.7418 |
| 4/21/2019 23:25 | 0.6    | -0.65   | 2.4218 | -0.4583 | 0.5913 | 5.1    | 0.1197 | -0.7418 |
| 4/21/2019 23:26 | 0.6    | 0.05    | 2.475  | -0.175  | 0.5913 | 5.1    | 0.1045 | -0.7418 |
| 4/21/2019 23:27 | 0.6    | -0.6667 | 2.1972 | -0.0417 | 0.5913 | 5.1833 | 0.1154 | -0.7418 |
| 4/21/2019 23:28 | 0.6    | -0.1667 | 2.5772 | -0.0417 | 0.5913 | 5.2    | 0.1097 | -0.7418 |
| 4/21/2019 23:29 | 0.6    | -0.15   | 2.395  | -0.225  | 0.5913 | 5.2    | 0.1064 | -0.7418 |
| 4/21/2019 23:30 | 0.6    | -0.7667 | 2.52   | -0.4167 | 0.5913 | 5.2    | 0.1216 | -0.7418 |
| 4/21/2019 23:31 | 0.6    | 0.55    | 2.6462 | -0.65   | 0.5913 | 5.2    | 0.1095 | -0.7418 |
| 4/21/2019 23:32 | 0.6    | 0.4     | 2.4882 | -0.225  | 0.5913 | 5.2    | 0.1262 | -0.7418 |
| 4/21/2019 23:33 | 0.6333 | 0.05    | 2.5338 | -0.375  | 0.5913 | 5.2    | 0.1158 | -0.7418 |
| 4/21/2019 23:34 | 0.7    | -0.0667 | 2.3408 | -0.5667 | 0.5913 | 5.2    | 0.1139 | -0.7418 |



|                 |        |         |        |         |        |        |        |         |
|-----------------|--------|---------|--------|---------|--------|--------|--------|---------|
| 4/21/2019 23:35 | 0.6    | -0.1    | 2.377  | -0.3833 | 0.5913 | 5.2    | 0.1191 | -0.7418 |
| 4/21/2019 23:36 | 0.6    | 0.3     | 2.456  | -0.2417 | 0.5913 | 5.2    | 0.1037 | -0.7418 |
| 4/21/2019 23:37 | 0.6    | 0.2     | 2.4078 | -1.125  | 0.5913 | 5.2    | 0.1204 | -0.7418 |
| 4/21/2019 23:38 | 0.6    | -0.4667 | 2.5318 | -0.1583 | 0.5913 | 5.2    | 0.1071 | -0.7418 |
| 4/21/2019 23:39 | 0.6    | -0.0167 | 2.163  | -0.3583 | 0.5913 | 5.2    | 0.1145 | -0.7418 |
| 4/21/2019 23:40 | 0.65   | 0.5     | 2.4623 | -0.2167 | 0.5913 | 5.2    | 0.1095 | -0.7418 |
| 4/21/2019 23:41 | 0.7    | -0.1167 | 2.3523 | 0.0083  | 0.5913 | 5.2    | 0.1076 | -0.7418 |
| 4/21/2019 23:42 | 0.7    | -0.25   | 2.4777 | -0.3167 | 0.5913 | 5.2    | 0.1133 | -0.7418 |
| 4/21/2019 23:43 | 0.7    | 0.5333  | 2.2898 | -0.475  | 0.5913 | 5.2    | 0.1066 | -0.7418 |
| 4/21/2019 23:44 | 0.7    | -0.5667 | 2.2297 | -0.575  | 0.5913 | 5.17   | 0.1093 | -0.7418 |
| 4/21/2019 23:45 | 0.7    | -0.2333 | 2.246  | -0.2917 | 0.5913 | 5.1    | 0.1165 | -0.7418 |
| 4/21/2019 23:46 | 0.7    | -0.2    | 2.2925 | -0.075  | 0.5913 | 5.1    | 0.112  | -0.7418 |
| 4/21/2019 23:47 | 0.7    | -0.3333 | 2.3327 | -0.4083 | 0.5913 | 5.0917 | 0.1166 | -0.7418 |
| 4/21/2019 23:48 | 0.6333 | 0.4667  | 2.4575 | -0.0333 | 0.5913 | 5      | 0.1119 | -0.7418 |
| 4/21/2019 23:49 | 0.5667 | -0.2    | 2.3342 | -0.1917 | 0.5913 | 5      | 0.1118 | -0.7418 |
| 4/21/2019 23:50 | 0.5    | 0.1167  | 2.3747 | -0.025  | 0.5913 | 5      | 0.1149 | -0.7418 |
| 4/21/2019 23:51 | 0.5    | -0.0333 | 2.3233 | -0.3833 | 0.5913 | 5      | 0.1056 | -0.7418 |
| 4/21/2019 23:52 | 0.5    | -0.1    | 2.4167 | -0.2917 | 0.5913 | 4.9636 | 0.115  | -0.7418 |
| 4/21/2019 23:53 | 0.525  | 0.5667  | 2.3247 | 0.0333  | 0.5913 | 4.9909 | 0.1026 | -0.7418 |
| 4/21/2019 23:54 | 0.575  | 0.0167  | 2.1783 | -0.0917 | 0.5913 | 5      | 0.1096 | -0.7418 |
| 4/21/2019 23:55 | 0.6    | -0.2    | 2.328  | -1.15   | 0.5913 | 4.9364 | 0.1135 | -0.7418 |
| 4/21/2019 23:56 | 0.6    | -0.0333 | 2.5768 | -0.3    | 0.5913 | 4.9083 | 0.1144 | -0.7418 |
| 4/21/2019 23:57 | 0.6    | -0.0833 | 2.5585 | -0.4667 | 0.5913 | 4.91   | 0.1206 | -0.7418 |
| 4/21/2019 23:58 | 0.6    | -0.1833 | 2.6657 | -0.325  | 0.5913 | 5      | 0.1031 | -0.7418 |
| 4/21/2019 23:59 | 0.6    | 0.3333  | 2.3265 | -0.2333 | 0.5913 | 5      | 0.1171 | -0.7418 |
| 4/22/2019 0:00  | 0.6    | -0.2167 | 2.2723 | -0.5167 | 0.5913 | 5      | 0.1112 | -0.7418 |
| 4/22/2019 0:01  | 0.5833 | 0.3167  | 2.2368 | -0.2083 | 0.5913 | 5      | 0.1076 | -0.7418 |
| 4/22/2019 0:02  | 0.5167 | 0.1     | 2.339  | 0.5167  | 0.5913 | 5      | 0.1155 | -0.7418 |
| 4/22/2019 0:03  | 0.5    | -0.5333 | 2.1728 | 0.0667  | 0.5913 | 5      | 0.1034 | -0.7418 |
| 4/22/2019 0:04  | 0.5583 | -0.3833 | 2.184  | 0.0833  | 0.5913 | 5      | 0.1201 | -0.7418 |
| 4/22/2019 0:05  | 0.6    | -0.1167 | 2.383  | 0.1833  | 0.5913 | 5      | 0.1159 | -0.7418 |
| 4/22/2019 0:06  | 0.675  | -0.3167 | 2.248  | -0.25   | 0.5913 | 4.9909 | 0.1005 | -0.7418 |
| 4/22/2019 0:07  | 0.7    | -0.4333 | 2.1863 | -0.3583 | 0.5913 | 4.9    | 0.1141 | -0.7418 |
| 4/22/2019 0:08  | 0.675  | 0.3     | 2.265  | 0.1333  | 0.5913 | 4.9    | 0.1058 | -0.7418 |
| 4/22/2019 0:09  | 0.6    | -0.3833 | 2.3588 | 0.6917  | 0.5913 | 4.9778 | 0.1153 | -0.7418 |
| 4/22/2019 0:10  | 0.6    | -0.1    | 2.1265 | -0.4333 | 0.5913 | 5      | 0.1098 | -0.7418 |
| 4/22/2019 0:11  | 0.6    | -0.15   | 2.2598 | -0.525  | 0.5913 | 5      | 0.1058 | -0.7418 |
| 4/22/2019 0:12  | 0.6    | -0.7167 | 2.242  | -0.0417 | 0.5913 | 5      | 0.1128 | -0.7418 |
| 4/22/2019 0:13  | 0.6    | -0.7167 | 2.1848 | -0.8167 | 0.5913 | 5      | 0.096  | -0.7418 |
| 4/22/2019 0:14  | 0.6    | -0.5333 | 2.3842 | -0.525  | 0.5913 | 5      | 0.1064 | -0.7418 |
| 4/22/2019 0:15  | 0.6    | 0.15    | 2.0288 | -0.4833 | 0.5913 | 5      | 0.1028 | -0.7418 |
| 4/22/2019 0:16  | 0.6    | -0.3167 | 2.2843 | 0       | 0.5913 | 5      | 0.0997 | -0.7418 |
| 4/22/2019 0:17  | 0.5167 | -0.3    | 2.3078 | -0.4583 | 0.5913 | 5      | 0.1146 | -0.7418 |
| 4/22/2019 0:18  | 0.5167 | -0.3    | 2.3178 | -0.6917 | 0.5913 | 5      | 0.1013 | -0.7418 |
| 4/22/2019 0:19  | 0.6    | -0.2833 | 2.3092 | -0.9583 | 0.5913 | 5      | 0.1105 | -0.7418 |
| 4/22/2019 0:20  | 0.6    | 0.1833  | 2.4503 | -0.3167 | 0.5913 | 5.0091 | 0.1144 | -0.7418 |
| 4/22/2019 0:21  | 0.6    | 0       | 2.283  | -0.4833 | 0.5913 | 5.1    | 0.1006 | -0.7418 |

|                |        |         |        |         |        |        |        |         |
|----------------|--------|---------|--------|---------|--------|--------|--------|---------|
| 4/22/2019 0:22 | 0.6    | 0.0667  | 2.1322 | -0.75   | 0.5913 | 5.1    | 0.1157 | -0.7418 |
| 4/22/2019 0:23 | 0.6    | -0.1333 | 2.2782 | -0.4583 | 0.5913 | 5.1    | 0.103  | -0.7418 |
| 4/22/2019 0:24 | 0.5667 | 0.0833  | 2.1313 | -0.225  | 0.5913 | 5.1    | 0.1172 | -0.7418 |
| 4/22/2019 0:25 | 0.5333 | 0.0167  | 2.2363 | -0.375  | 0.5913 | 5.1    | 0.1143 | -0.7418 |
| 4/22/2019 0:26 | 0.6    | -0.3167 | 2.0533 | -0.1167 | 0.5913 | 5.1    | 0.1083 | -0.7418 |
| 4/22/2019 0:27 | 0.65   | -0.0833 | 2.3582 | -0.5083 | 0.5913 | 5.1    | 0.1138 | -0.7418 |
| 4/22/2019 0:28 | 0.7    | 0.1833  | 2.17   | -0.125  | 0.5913 | 5.1    | 0.0981 | -0.7418 |
| 4/22/2019 0:29 | 0.7    | -0.0167 | 2.0045 | -0.0583 | 0.5913 | 5.1    | 0.1166 | -0.7418 |
| 4/22/2019 0:30 | 0.725  | -0.15   | 2.2645 | -0.075  | 0.5913 | 5.08   | 0.112  | -0.7418 |
| 4/22/2019 0:31 | 0.7    | 0.1833  | 2.0878 | 0.15    | 0.5913 | 5.0778 | 0.102  | -0.7418 |
| 4/22/2019 0:32 | 0.7    |         | 2.2968 | 0.0583  | 0.5913 | 5.0333 | 0.1185 | -0.7418 |
| 4/22/2019 0:33 | 0.7    |         | 2.2635 | -0.7333 | 0.5913 | 5      | 0.1001 | -0.7418 |
| 4/22/2019 0:34 | 0.7    |         | 2.378  | -0.9583 | 0.5913 | 5      | 0.1139 | -0.7418 |
| 4/22/2019 0:35 | 0.7    | -0.55   | 2.3148 | -0.4917 | 0.5913 | 4.9889 | 0.1071 | -0.7418 |
| 4/22/2019 0:36 | 0.7    | 2.2     | 2.0923 | -0.5333 | 0.5913 | 5      | 0.1027 | -0.7418 |
| 4/22/2019 0:37 | 0.675  | -0.0833 | 1.9098 | -0.7333 | 0.5913 | 5      | 0.1175 | -0.7418 |
| 4/22/2019 0:38 | 0.6917 | -0.35   | 2.0665 | -0.925  | 0.5913 | 5      | 0.0994 | -0.7418 |
| 4/22/2019 0:39 | 0.675  | -0.1167 | 1.8702 | -0.4583 | 0.5913 | 4.97   | 0.1156 | -0.7418 |
| 4/22/2019 0:40 | 0.6917 | 2.675   | 2.3525 | -0.3917 | 0.5913 | 4.91   | 0.1063 | -0.7418 |
| 4/22/2019 0:41 | 0.625  | -0.91   | 2.1139 | -0.3583 | 0.5913 | 5      | 0.1121 | -0.7418 |
| 4/22/2019 0:42 | 0.6    | -0.55   | 2.3328 | -0.35   | 0.5913 | 5      | 0.1106 | -0.7418 |
| 4/22/2019 0:43 | 0.6583 |         | 2.2086 | -0.075  | 0.5913 | 5      | 0.1055 | -0.7418 |
| 4/22/2019 0:44 | 0.6583 |         | 2.16   | -0.475  | 0.5913 | 5      | 0.1183 | -0.7418 |
| 4/22/2019 0:45 | 0.6167 |         | 2.2292 | -0.475  | 0.5913 | 5      | 0.1026 | -0.7418 |
| 4/22/2019 0:46 | 0.6    |         | 2.1531 | -0.2    | 0.5913 | 5      | 0.1117 | -0.7418 |
| 4/22/2019 0:47 | 0.6    |         | 2.3024 | -0.6667 | 0.5913 | 5      | 0.1103 | -0.7418 |
| 4/22/2019 0:48 | 0.6    |         | 1.7883 | 0       | 0.5913 | 5      | 0.1012 | -0.7418 |
| 4/22/2019 0:49 | 0.6167 |         | 2.0989 | -0.3417 | 0.5913 | 5      | 0.1094 | -0.7418 |
| 4/22/2019 0:50 | 0.6917 |         | 2.1359 | -0.425  | 0.5913 | 5      | 0.0978 | -0.7418 |
| 4/22/2019 0:51 | 0.7    |         | 1.9813 | -0.3    | 0.5913 | 5      | 0.1086 | -0.7418 |
| 4/22/2019 0:52 | 0.625  |         | 2.0293 | -0.5417 | 0.5913 | 5.075  | 0.1051 | -0.7418 |
| 4/22/2019 0:53 | 0.6167 |         | 2.1021 | -0.5583 | 0.5913 | 5.1    | 0.1011 | -0.7418 |
| 4/22/2019 0:54 | 0.6417 |         | 2.1609 | -0.4    | 0.5913 | 5.0909 | 0.1135 | -0.7418 |
| 4/22/2019 0:55 | 0.7    |         | 2.1663 | -0.375  | 0.5913 | 5.025  | 0.0989 | -0.7418 |
| 4/22/2019 0:56 | 0.7    |         | 2.137  | -0.1333 | 0.5913 | 5.1    | 0.1127 | -0.7418 |
| 4/22/2019 0:57 | 0.7    |         | 2.0958 | -0.4917 | 0.5913 | 5.1    | 0.1018 | -0.7418 |
| 4/22/2019 0:58 | 0.7    |         | 1.939  | -0.0833 | 0.5913 | 5.1    | 0.1068 | -0.7418 |
| 4/22/2019 0:59 | 0.7    |         | 1.8091 | -0.3583 | 0.5913 | 5.1    | 0.1084 | -0.7418 |
| 4/22/2019 1:00 | 0.7    |         | 1.936  | -0.4833 | 0.5913 | 5.1    | 0.0977 | -0.7418 |
| 4/22/2019 1:01 | 0.7167 |         | 1.8579 | 0.45    | 0.5913 | 5.1    | 0.1091 | -0.7418 |
| 4/22/2019 1:02 | 0.7    | 0.0833  | 2.1631 | -0.5    | 0.5913 | 5.1    | 0.1029 | -0.7418 |
| 4/22/2019 1:03 | 0.6917 | 0.7     | 2.1143 | -0.4333 | 0.5913 | 5.0917 | 0.1076 | -0.7418 |
| 4/22/2019 1:04 | 0.6417 | -0.2182 | 2.0934 | -0.0583 | 0.5913 | 5      | 0.1082 | -0.7418 |
| 4/22/2019 1:05 | 0.6667 | 0.3333  | 1.9287 | 0.0583  | 0.5913 | 5      | 0.0994 | -0.7418 |
| 4/22/2019 1:06 | 0.7    | 0.3417  | 2.0675 | 0.175   | 0.5913 | 5      | 0.111  | -0.7418 |
| 4/22/2019 1:07 | 0.675  | 1.0917  | 2.0456 | -0.575  | 0.5913 | 5      | 0.1014 | -0.7418 |
| 4/22/2019 1:08 | 0.6667 | -0.3833 | 1.7953 | -1.1083 | 0.5913 | 5      | 0.1054 | -0.7418 |

|                |        |         |        |         |        |        |        |         |
|----------------|--------|---------|--------|---------|--------|--------|--------|---------|
| 4/22/2019 1:09 | 0.6333 | 0.15    | 2.0007 | -0.0417 | 0.5913 | 5      | 0.1074 | -0.7418 |
| 4/22/2019 1:10 | 0.6583 | 0.3833  | 2.4704 | -0.3333 | 0.5913 | 5      | 0.0966 | -0.7418 |
| 4/22/2019 1:11 | 0.6917 | 0.0417  | 1.999  | 0.025   | 0.5913 | 5      | 0.1109 | -0.7418 |
| 4/22/2019 1:12 | 0.6833 | 0.35    | 2.1798 | -0.525  | 0.5913 | 5      | 0.0987 | -0.7418 |
| 4/22/2019 1:13 | 0.6917 | -0.1667 | 1.9643 | -0.4417 | 0.5913 | 5      | 0.1137 | -0.7418 |
| 4/22/2019 1:14 | 0.7    | 0.0083  | 1.716  | -0.225  | 0.5913 | 4.95   | 0.1077 | -0.7418 |
| 4/22/2019 1:15 | 0.7    | -0.0167 | 1.9818 | 0.075   | 0.5913 | 4.9333 | 0.0971 | -0.7418 |
| 4/22/2019 1:16 | 0.7    | -0.6083 | 1.9435 | -0.725  | 0.5913 | 5      | 0.1072 | -0.7418 |
| 4/22/2019 1:17 | 0.7    | -0.425  | 1.9715 | -0.175  | 0.5913 | 5      | 0.0954 | -0.7418 |
| 4/22/2019 1:18 | 0.7    | -0.3833 | 2.1201 | -0.175  | 0.5913 | 4.9    | 0.1078 | -0.7418 |
| 4/22/2019 1:19 | 0.7    | -0.3    | 1.9489 | -0.3333 | 0.5913 | 4.9    | 0.1005 | -0.7418 |
| 4/22/2019 1:20 | 0.7    | 0.7917  | 1.9462 | -0.1167 | 0.5913 | 4.9    | 0.0952 | -0.7418 |
| 4/22/2019 1:21 | 0.7    | 0.2417  | 1.9187 | -0.4417 | 0.5913 | 4.9    | 0.1095 | -0.7418 |
| 4/22/2019 1:22 | 0.6091 | -0.15   | 2.02   | -0.4333 | 0.5913 | 4.9    | 0.101  | -0.7418 |
| 4/22/2019 1:23 | 0.6    | -0.1833 | 2.2307 | -0.9833 | 0.5913 | 4.9    | 0.1043 | -0.7418 |
| 4/22/2019 1:24 | 0.6    | -0.025  | 1.7285 | -0.2333 | 0.5913 | 4.9    | 0.1089 | -0.7418 |
| 4/22/2019 1:25 | 0.6    | -0.3583 | 1.8933 | -0.5917 | 0.5913 | 4.9    | 0.0984 | -0.7418 |
| 4/22/2019 1:26 | 0.6    | -0.6417 | 1.7216 | -0.55   | 0.5913 | 4.9    | 0.1093 | -0.7418 |
| 4/22/2019 1:27 | 0.6    | 0.4     | 2.1647 | -1.1    | 0.5913 | 4.9    | 0.0917 | -0.7418 |
| 4/22/2019 1:28 | 0.6    | 0.1833  | 1.8501 | -0.2167 | 0.5913 | 4.8182 | 0.1033 | -0.7418 |
| 4/22/2019 1:29 | 0.6    | 0.4667  | 1.9438 | -0.275  | 0.5913 | 4.8    | 0.1001 | -0.7418 |
| 4/22/2019 1:30 | 0.6    | 0.0667  | 1.9843 | 0.3583  | 0.5913 | 4.8    | 0.098  | -0.7418 |
| 4/22/2019 1:31 | 0.6    | -0.0917 | 1.7154 | -0.1    | 0.5913 | 4.8    | 0.1073 | -0.7418 |
| 4/22/2019 1:32 | 0.6    | -0.05   | 1.8622 | -0.275  | 0.5913 | 4.7455 | 0.0951 | -0.7418 |
| 4/22/2019 1:33 | 0.5833 | -0.1167 | 1.6152 | -0.2417 | 0.5913 | 4.7    | 0.1097 | -0.7418 |
| 4/22/2019 1:34 | 0.5    | -0.4417 | 1.6675 | -0.2583 | 0.5913 | 4.7    | 0.0991 | -0.7418 |
| 4/22/2019 1:35 | 0.5167 | -0.15   | 2.0034 | -0.275  | 0.5913 | 4.75   | 0.1054 | -0.7418 |
| 4/22/2019 1:36 | 0.5    | 0.2083  | 1.9526 | -0.0583 | 0.5913 | 4.7917 | 0.1082 | -0.7418 |
| 4/22/2019 1:37 | 0.5    | -0.3333 | 2.1036 | -0.3    | 0.5913 | 4.7545 | 0.0944 | -0.7418 |
| 4/22/2019 1:38 | 0.5    | -0.2167 | 1.8692 | -0.0667 | 0.5913 | 4.8    | 0.1106 | -0.7418 |
| 4/22/2019 1:39 | 0.5917 | -0.1583 | 1.976  | -0.425  | 0.5913 | 4.8    | 0.1068 | -0.7418 |
| 4/22/2019 1:40 | 0.6    | -0.2417 | 2.0977 | -0.4167 | 0.5913 | 4.8    | 0.098  | -0.7418 |
| 4/22/2019 1:41 | 0.6    | -0.4083 | 1.8183 | -0.475  | 0.5913 | 4.8    | 0.1122 | -0.7418 |
| 4/22/2019 1:42 | 0.6    | -0.4167 | 2.1089 | -0.1417 | 0.5913 | 4.8    | 0.0917 | -0.7418 |
| 4/22/2019 1:43 | 0.6    | 0.275   | 2.109  | -0.45   | 0.5913 | 4.8917 | 0.1014 | -0.7418 |
| 4/22/2019 1:44 | 0.6    | -0.2667 | 1.886  | -0.35   | 0.5913 | 4.9    | 0.1053 | -0.7418 |
| 4/22/2019 1:45 | 0.6    | 0.225   | 1.7752 | -0.5833 | 0.5913 | 4.9    | 0.1006 | -0.7418 |
| 4/22/2019 1:46 | 0.6583 | -0.4833 | 2.1508 | -0.725  | 0.5913 | 4.9667 | 0.1069 | -0.7418 |
| 4/22/2019 1:47 | 0.7    | -0.5    | 1.7819 | -0.3333 | 0.5913 | 4.925  | 0.0899 | -0.7418 |
| 4/22/2019 1:48 | 0.7833 | -0.2083 | 1.4193 | -0.1167 | 0.5913 | 4.9    | 0.1029 | -0.7418 |
| 4/22/2019 1:49 | 0.7083 | 0.5     | 1.8651 | -0.7167 | 0.5913 | 4.9818 | 0.1054 | -0.7418 |
| 4/22/2019 1:50 | 0.7    | 0.0167  | 1.6862 | -0.5917 | 0.5913 | 4.94   | 0.0947 | -0.7418 |
| 4/22/2019 1:51 | 0.675  | -0.6917 | 1.9519 | -0.6333 | 0.5913 | 4.9    | 0.1075 | -0.7418 |
| 4/22/2019 1:52 | 0.6917 | -0.3083 | 2.0907 | -0.4667 | 0.5913 | 4.99   | 0.0958 | -0.7418 |
| 4/22/2019 1:53 | 0.6667 | -0.7833 | 1.7228 | -0.425  | 0.5913 | 5      | 0.1071 | -0.7418 |
| 4/22/2019 1:54 | 0.6    | 0.1583  | 1.7793 | -0.9083 | 0.5913 | 5      | 0.1052 | -0.7418 |
| 4/22/2019 1:55 | 0.6    | 0.1167  | 1.941  | -0.475  | 0.5913 | 5      | 0.0854 | -0.7418 |

|                |        |         |        |         |        |        |        |         |
|----------------|--------|---------|--------|---------|--------|--------|--------|---------|
| 4/22/2019 1:56 | 0.6333 | -0.8667 | 2.1555 | -0.1417 | 0.5913 | 5      | 0.1113 | -0.7418 |
| 4/22/2019 1:57 | 0.7    | 0       | 2.0547 | -0.2    | 0.5913 | 5      | 0.0966 | -0.7418 |
| 4/22/2019 1:58 | 0.65   | 0.3667  | 1.7891 | -0.6417 | 0.5913 | 5      | 0.0951 | -0.7418 |
| 4/22/2019 1:59 | 0.6    | -0.0417 | 1.8166 | -0.5333 | 0.5913 | 5      | 0.104  | -0.7418 |
| 4/22/2019 2:00 | 0.6    | -0.4167 | 1.7658 | -0.375  | 0.5913 | 5.0455 | 0.0992 | -0.7418 |
| 4/22/2019 2:01 | 0.6    | -0.0167 | 1.4996 | -0.4083 | 0.5913 | 5.025  | 0.1069 | -0.7418 |
| 4/22/2019 2:02 | 0.6    | -0.1583 | 1.894  | -0.4417 | 0.5913 | 5.01   | 0.0896 | -0.7418 |
| 4/22/2019 2:03 | 0.6    | -0.3083 | 1.715  | -0.0583 | 0.5913 | 5.025  | 0.1052 | -0.7418 |
| 4/22/2019 2:04 | 0.6    | -0.4    | 1.5935 | -0.3333 | 0.5913 | 5      | 0.0949 | -0.7418 |
| 4/22/2019 2:05 | 0.6    | -0.2667 | 1.8587 | -0.35   | 0.5913 | 5      | 0.0922 | -0.7418 |
| 4/22/2019 2:06 | 0.6    | 0.1833  | 1.9133 | -0.0583 | 0.5913 | 5      | 0.1019 | -0.7418 |
| 4/22/2019 2:07 | 0.6    | -0.5167 | 1.7683 | -0.1083 | 0.5913 | 5      | 0.0863 | -0.7418 |
| 4/22/2019 2:08 | 0.6    | -0.3083 | 2.08   | -0.6333 | 0.5913 | 5      | 0.0909 | -0.7418 |
| 4/22/2019 2:09 | 0.5917 | -1.0917 | 1.934  | 0.0167  | 0.5913 | 5      | 0.0938 | -0.7418 |
| 4/22/2019 2:10 | 0.6    | -1.4167 | 1.819  | -0.8083 | 0.5913 | 5      | 0.082  | -0.7418 |
| 4/22/2019 2:11 | 0.6    | -0.525  | 2.0953 | -0.4667 | 0.5913 | 5      | 0.0867 | -0.7418 |
| 4/22/2019 2:12 | 0.6    | 0.2333  | 1.7847 | -0.0333 | 0.5913 | 5      | 0.0826 | -0.7418 |
| 4/22/2019 2:13 | 0.6167 | -0.4083 | 1.7438 | -0.5667 | 0.5913 | 5      | 0.0783 | -0.7418 |
| 4/22/2019 2:14 | 0.6667 | -0.2167 | 2.0342 | -0.1083 | 0.5913 | 5      | 0.084  | -0.7418 |
| 4/22/2019 2:15 | 0.7    | 0.1     | 1.9322 | -0.525  | 0.5913 | 5      | 0.07   | -0.7418 |
| 4/22/2019 2:16 | 0.75   | 0.4667  | 2.1642 | -0.775  | 0.5913 | 5      | 0.0772 | -0.7418 |
| 4/22/2019 2:17 | 0.8    | 0.2167  | 1.9443 | -0.3083 | 0.5913 | 5      | 0.0704 | -0.7418 |
| 4/22/2019 2:18 | 0.8    | -0.2583 | 1.8293 | -0.4417 | 0.5913 | 5      | 0.0681 | -0.7418 |
| 4/22/2019 2:19 | 0.8    | -0.3    | 1.84   | -0.275  | 0.5913 | 5      | 0.0788 | -0.7418 |
| 4/22/2019 2:20 | 0.8083 | -0.0167 | 2.0297 | -0.175  | 0.5913 | 5.05   | 0.0772 | -0.7418 |
| 4/22/2019 2:21 | 0.825  | -0.4417 | 2.051  | -0.2917 | 0.5913 | 5.1    | 0.0683 | -0.7418 |
| 4/22/2019 2:22 | 0.7667 | 0.075   | 2.021  | -0.4    | 0.5913 | 5.1    | 0.0791 | -0.7418 |
| 4/22/2019 2:23 | 0.6833 | -0.3917 | 2.0495 | -0.225  | 0.5913 | 5.1    | 0.0708 | -0.7418 |
| 4/22/2019 2:24 | 0.6667 | -0.0917 | 2.0755 | -0.2333 | 0.5913 | 5.1    | 0.0662 | -0.7418 |
| 4/22/2019 2:25 | 0.65   | 0.0417  | 1.8005 | -0.4    | 0.5913 | 5.05   | 0.0768 | -0.7418 |
| 4/22/2019 2:26 | 0.6    | 0.4333  | 1.6803 | -0.7667 | 0.5913 | 5      | 0.0668 | -0.7418 |
| 4/22/2019 2:27 | 0.6    | 0.0083  | 1.8112 | -0.1667 | 0.5913 | 5      | 0.0701 | -0.7418 |
| 4/22/2019 2:28 | 0.65   | -0.5333 | 1.5168 | -0.05   | 0.5913 | 5      | 0.0774 | -0.7418 |
| 4/22/2019 2:29 | 0.6333 | -0.3917 | 1.8202 | -0.1083 | 0.5913 | 5.06   | 0.0654 | -0.7418 |
| 4/22/2019 2:30 | 0.6    | 0.6917  | 2.0117 | -0.425  | 0.5913 | 5.1    | 0.0827 | -0.7418 |
| 4/22/2019 2:31 | 0.5167 | -0.1667 | 1.952  | -0.6833 | 0.5913 | 5.1    | 0.0694 | -0.7418 |
| 4/22/2019 2:32 | 0.5    | -0.55   | 2.0225 | -0.1833 | 0.5913 | 5.175  | 0.0644 | -0.7418 |
| 4/22/2019 2:33 | 0.5333 | -1.0583 | 1.8898 | -0.3583 | 0.5913 | 5.3444 | 0.0727 | -0.7418 |
| 4/22/2019 2:34 | 0.55   | -0.4667 | 1.8207 | 0.65    | 0.5913 | 5.7    | 0.059  | -0.7418 |
| 4/22/2019 2:35 | 0.5    | -0.175  | 1.7405 | 0.0917  | 0.5913 | 5.9    | 0.07   | -0.7418 |
| 4/22/2019 2:36 | 0.5    | 0.3833  | 2.0527 | -0.275  | 0.5913 | 6.0167 | 0.0784 | -0.7418 |
| 4/22/2019 2:37 | 0.5    | -0.375  | 1.8463 | -0.3667 | 0.5913 | 6.61   | 0.0658 | -0.7418 |
| 4/22/2019 2:38 | 0.5667 | -0.075  | 1.7703 | -0.5083 | 0.5913 | 6.9833 | 0.07   | -0.7418 |
| 4/22/2019 2:39 | 0.6    | 0.0833  | 1.8022 | -0.85   | 0.5913 | 7.2455 | 0.071  | -0.7418 |
| 4/22/2019 2:40 | 0.6    | -0.3833 | 1.9493 | -0.45   | 0.5913 | 7.4909 | 0.0594 | -0.7418 |
| 4/22/2019 2:41 | 0.6    | 0.3333  | 1.7747 | -0.8583 | 0.5913 | 7.78   | 0.0773 | -0.7418 |
| 4/22/2019 2:42 | 0.5083 | -0.3417 | 1.8888 | -0.575  | 0.5913 | 8.0091 | 0.0619 | -0.7418 |

|                |        |         |        |         |        |         |        |         |
|----------------|--------|---------|--------|---------|--------|---------|--------|---------|
| 4/22/2019 2:43 | 0.5    | 0.2417  | 2.0222 | -0.2667 | 0.5913 | 8.3727  | 0.0691 | -0.7418 |
| 4/22/2019 2:44 | 0.5    | 0.825   | 1.8747 | -0.3083 | 0.5913 | 8.6833  | 0.0672 | -0.7418 |
| 4/22/2019 2:45 | 0.5    | 0.2083  | 1.7192 | 0.0083  | 0.5913 | 8.8667  | 0.0609 | -0.7418 |
| 4/22/2019 2:46 | 0.5583 | -0.3333 | 1.7535 | -0.7167 | 0.5913 | 8.8364  | 0.0675 | -0.7418 |
| 4/22/2019 2:47 | 0.5167 | -0.6417 | 1.9567 | -0.4083 | 0.5913 | 9.0182  | 0.0755 | -0.7418 |
| 4/22/2019 2:48 | 0.6    | -0.35   | 1.8702 | -0.0083 | 0.5913 | 9.4091  | 0.0676 | -0.7418 |
| 4/22/2019 2:49 | 0.5583 | -0.9583 | 2.1512 | -0.1417 | 0.5913 | 9.17    | 0.0728 | -0.7418 |
| 4/22/2019 2:50 | 0.575  | -0.1833 | 1.7252 | -0.475  | 0.5913 | 8.9417  | 0.0751 | -0.7418 |
| 4/22/2019 2:51 | 0.6    | -0.5333 | 1.8198 | -0.3583 | 0.5913 | 8.8545  | 0.0597 | -0.7418 |
| 4/22/2019 2:52 | 0.6    | 0.025   | 1.8313 | -0.65   | 0.5913 | 8.6667  | 0.0795 | -0.7418 |
| 4/22/2019 2:53 | 0.6    | 0.0583  | 1.9892 | -0.7167 | 0.5913 | 8.84    | 0.0753 | -0.7418 |
| 4/22/2019 2:54 | 0.6    | -0.4    | 2.0125 | 0.0167  | 0.5913 | 8.7818  | 0.0683 | -0.7418 |
| 4/22/2019 2:55 | 0.55   | -0.0583 | 1.8208 | -0.55   | 0.5913 | 8.6727  | 0.0673 | -0.7418 |
| 4/22/2019 2:56 | 0.5833 | -0.25   | 1.8308 | -0.2917 | 0.5913 | 8.8667  | 0.0665 | -0.7418 |
| 4/22/2019 2:57 | 0.6    | -0.25   | 1.8408 | -0.6667 | 0.5913 | 8.9545  | 0.0642 | -0.7418 |
| 4/22/2019 2:58 | 0.6583 | -0.1    | 1.757  | -1.2083 | 0.5913 | 9.175   | 0.0814 | -0.7418 |
| 4/22/2019 2:59 | 0.7    | 0.3     | 1.6968 | -0.3917 | 0.5913 | 9.1636  | 0.0683 | -0.7418 |
| 4/22/2019 3:00 | 0.7    | 0.0667  | 1.6525 | -0.8083 | 0.5913 | 9.1818  | 0.072  | -0.7418 |
| 4/22/2019 3:01 | 0.7    | -0.1083 | 1.838  | -0.5083 | 0.5913 | 9.3167  | 0.0797 | -0.7418 |
| 4/22/2019 3:02 | 0.7    | 0.3667  | 1.7477 | 0.15    | 0.5913 | 9.3636  | 0.0666 | -0.7418 |
| 4/22/2019 3:03 | 0.7    | -0.0333 | 1.9812 | -0.6167 | 0.5913 | 9.375   | 0.0824 | -0.7418 |
| 4/22/2019 3:04 | 0.7    | -0.0583 | 1.6028 | -0.2083 | 0.5913 | 9.63    | 0.0721 | -0.7418 |
| 4/22/2019 3:05 | 0.7    | 0.1333  | 1.7582 | -0.6333 | 0.5913 | 9.9909  | 0.0688 | -0.7418 |
| 4/22/2019 3:06 | 0.725  | -0.05   | 1.8315 | -0.45   | 0.5913 | 10.1    | 0.0899 | -0.7418 |
| 4/22/2019 3:07 | 0.7083 | 0.225   | 1.49   | -1.0167 | 0.5913 | 10.4546 | 0.0759 | -0.7418 |
| 4/22/2019 3:08 | 0.7    | 0.05    | 1.8858 | -0.9917 | 0.5913 | 10.6636 | 0.0823 | -0.7418 |
| 4/22/2019 3:09 | 0.7    | 0.5167  | 1.5893 | -0.8917 | 0.5913 | 10.5    | 0.0872 | -0.7418 |
| 4/22/2019 3:10 | 0.7    | -0.1667 | 1.4085 | -0.75   | 0.5913 | 10.5636 | 0.0762 | -0.7418 |
| 4/22/2019 3:11 | 0.7    | -0.2583 | 1.8543 | -0.0333 | 0.5913 | 10.8909 | 0.0917 | -0.7418 |
| 4/22/2019 3:12 | 0.6917 | -0.1167 | 1.463  | -0.7583 | 0.5913 | 11.2    | 0.0864 | -0.7418 |
| 4/22/2019 3:13 | 0.6    | 0.0917  | 1.6358 | -0.8833 | 0.5913 | 11.21   | 0.0806 | -0.7418 |
| 4/22/2019 3:14 | 0.6    | -0.0833 | 1.7812 | -0.675  | 0.5913 | 11.4727 | 0.082  | -0.7418 |
| 4/22/2019 3:15 | 0.6    | -0.275  | 1.8135 | -0.4333 | 0.5913 | 11.975  | 0.0861 | -0.7418 |
| 4/22/2019 3:16 | 0.5667 | 0.2833  | 1.444  | -0.575  | 0.5913 | 12.3546 | 0.0863 | -0.7418 |
| 4/22/2019 3:17 | 0.5    | 0.2     | 1.454  | 0.3667  | 0.5913 | 12.7364 | 0.0957 | -0.7418 |
| 4/22/2019 3:18 | 0.5    | -0.4583 | 1.5732 | 0.075   | 0.5913 | 13.2    | 0.0847 | -0.7418 |
| 4/22/2019 3:19 | 0.5083 | 0.8833  | 1.7765 | -0.8583 | 0.5913 | 13.2364 | 0.0936 | -0.7418 |
| 4/22/2019 3:20 | 0.6    | -0.0083 | 1.4907 | -0.3083 | 0.5913 | 12.975  | 0.0978 | -0.7418 |
| 4/22/2019 3:21 | 0.6    | -0.6917 | 1.435  | -0.3583 | 0.5913 | 13.37   | 0.084  | -0.7418 |
| 4/22/2019 3:22 | 0.6    | -0.0417 | 1.6392 | -0.45   | 0.5913 | 13.3546 | 0.0971 | -0.7418 |
| 4/22/2019 3:23 | 0.6    | 0.2583  | 1.4462 | -0.55   | 0.5913 | 13.45   | 0.0926 | -0.7418 |
| 4/22/2019 3:24 | 0.525  | 0.0917  | 1.4365 | -0.5167 | 0.5913 | 13.2636 | 0.092  | -0.7418 |
| 4/22/2019 3:25 | 0.5    | -0.6    | 1.7917 | 0.0083  | 0.5913 | 13.5364 | 0.1003 | -0.7418 |
| 4/22/2019 3:26 | 0.5    | -0.275  | 1.466  | -0.65   | 0.5913 | 13.4636 | 0.0903 | -0.7418 |
| 4/22/2019 3:27 | 0.5    | 0.1083  | 1.8177 | -0.7583 | 0.5913 | 13.38   | 0.0975 | -0.7418 |
| 4/22/2019 3:28 | 0.5    | 0.1583  | 1.3326 | -0.125  | 0.5913 | 13.2273 | 0.0983 | -0.7418 |
| 4/22/2019 3:29 | 0.55   | 0.125   | 1.4255 | -0.575  | 0.5913 | 12.8091 | 0.0895 | -0.7418 |

|                |        |         |        |         |        |         |        |         |
|----------------|--------|---------|--------|---------|--------|---------|--------|---------|
| 4/22/2019 3:30 | 0.6    | -0.1083 | 1.6553 | -0.05   | 0.5913 | 12.1546 | 0.1003 | -0.7418 |
| 4/22/2019 3:31 | 0.625  | 0.0583  | 1.6408 | -0.5167 | 0.5913 | 12.4    | 0.0966 | -0.7418 |
| 4/22/2019 3:32 | 0.6417 | -0.6667 | 1.4755 | -0.8083 | 0.5913 | 12.4273 | 0.0983 | -0.7418 |
| 4/22/2019 3:33 | 0.6    | -0.4583 | 1.5087 | -0.3    | 0.5913 | 12.02   | 0.1002 | -0.7418 |
| 4/22/2019 3:34 | 0.6    | 0.1417  | 1.8014 | -0.5083 | 0.5913 | 12.3273 | 0.0934 | -0.7418 |
| 4/22/2019 3:35 | 0.6    | -0.425  | 1.4131 | -0.5    | 0.5913 | 11.8273 | 0.109  | -0.7418 |
| 4/22/2019 3:36 | 0.6    | -0.175  | 1.3656 | -0.3167 | 0.5913 | 11.3182 | 0.0868 | -0.7418 |
| 4/22/2019 3:37 | 0.65   | -0.35   | 1.5601 | -0.5417 | 0.5913 | 10.65   | 0.0976 | -0.7418 |
| 4/22/2019 3:38 | 0.6333 | -0.6667 | 1.3927 | -0.6417 | 0.5913 | 10.42   | 0.1051 | -0.7418 |
| 4/22/2019 3:39 | 0.6    | -0.55   | 1.3179 | -0.6417 | 0.5913 | 10.53   | 0.09   | -0.7418 |
| 4/22/2019 3:40 | 0.6    | 0.2333  | 1.3583 | -1.0083 | 0.5913 | 10.5727 | 0.106  | -0.7418 |
| 4/22/2019 3:41 | 0.6917 | -0.8167 | 1.7691 | -0.3167 | 0.5913 | 11.4889 | 0.0946 | -0.7418 |
| 4/22/2019 3:42 | 0.7    | -0.0917 | 1.5013 | -0.175  | 0.5913 | 11.96   | 0.0933 | -0.7418 |
| 4/22/2019 3:43 | 0.7    | -0.1833 | 1.4355 | -0.425  | 0.5913 | 12.0222 | 0.0994 | -0.7418 |
| 4/22/2019 3:44 | 0.7    | 0.175   | 1.4154 | -0.2    | 0.5913 | 12.06   | 0.0907 | -0.7418 |
| 4/22/2019 3:45 | 0.6917 | -0.65   | 1.5338 | -0.275  | 0.5913 | 12.7778 | 0.1003 | -0.7418 |
| 4/22/2019 3:46 | 0.6    | -0.025  | 1.2945 | 0.5417  | 0.5913 | 12.76   | 0.0934 | -0.7418 |
| 4/22/2019 3:47 | 0.6    | 0.0667  | 1.5273 | -0.5083 | 0.5913 | 13.4667 | 0.0945 | -0.7418 |
| 4/22/2019 3:48 | 0.6    | -0.65   | 1.2279 | -0.7583 | 0.5913 | 14.01   | 0.1008 | -0.7418 |
| 4/22/2019 3:49 | 0.6    | -0.175  | 1.6493 | -0.3083 | 0.5913 | 14.2546 | 0.0937 | -0.7418 |
| 4/22/2019 3:50 | 0.6    | -0.2583 | 1.6675 | -0.2583 | 0.5913 | 14.2818 | 0.0988 | -0.7418 |
| 4/22/2019 3:51 | 0.6    | -0.8833 | 1.2934 | -0.95   | 0.5913 | 14.83   | 0.0989 | -0.7418 |
| 4/22/2019 3:52 | 0.6    | 0.0333  | 1.3873 | -0.6167 | 0.5913 | 15.02   | 0.0816 | -0.7418 |
| 4/22/2019 3:53 | 0.6    | -0.025  | 1.5363 | -0.0833 | 0.5913 | 14.12   | 0.0995 | -0.7418 |
| 4/22/2019 3:54 | 0.6    | -0.5833 | 1.6406 | -0.4917 | 0.5913 | 13.8273 | 0.087  | -0.7418 |
| 4/22/2019 3:55 | 0.6    | -0.1167 | 1.5167 | -0.4833 | 0.5913 | 13.35   | 0.0873 | -0.7418 |
| 4/22/2019 3:56 | 0.6    | -0.2583 | 1.3197 | -0.2    | 0.5913 | 13.3727 | 0.0964 | -0.7418 |
| 4/22/2019 3:57 | 0.6    | -0.2667 | 1.577  | -0.325  | 0.5913 | 13.18   | 0.0844 | -0.7418 |
| 4/22/2019 3:58 | 0.55   | -0.475  | 1.3953 | -0.7    | 0.5913 | 13.1273 | 0.1002 | -0.7418 |
| 4/22/2019 3:59 | 0.5917 | -0.8    | 1.4695 | -0.8417 | 0.5913 | 13.2182 | 0.0891 | -0.7418 |
| 4/22/2019 4:00 | 0.6    | -0.6167 | 1.2755 | -1.0667 | 0.5913 | 13.7273 | 0.0888 | -0.7418 |
| 4/22/2019 4:01 | 0.6    | -0.2917 | 1.4258 | -0.475  | 0.5913 | 14.4455 | 0.1018 | -0.7418 |
| 4/22/2019 4:02 | 0.6182 | 0.2667  | 1.5558 | -0.5333 | 0.5913 | 15.2818 | 0.0835 | -0.7418 |
| 4/22/2019 4:03 | 0.7    | -0.1833 | 1.6576 | -0.25   | 0.5913 | 15.27   | 0.1009 | -0.7418 |
| 4/22/2019 4:04 | 0.7    | 0.325   | 1.5285 | -0.4    | 0.5913 | 14.82   | 0.0953 | -0.7418 |
| 4/22/2019 4:05 | 0.7    | -0.5917 | 1.404  | 0.0583  | 0.5913 | 15.1273 | 0.0901 | -0.7418 |
| 4/22/2019 4:06 | 0.7    | -0.1583 | 1.5341 | -0.5083 | 0.5913 | 15.4364 | 0.1034 | -0.7418 |
| 4/22/2019 4:07 | 0.7    | -0.1583 | 1.6099 | -0.7583 | 0.5913 | 15.61   | 0.0909 | -0.7418 |
| 4/22/2019 4:08 | 0.7    | -0.2083 | 1.346  | -0.3833 | 0.5913 | 15.95   | 0.1026 | -0.7418 |
| 4/22/2019 4:09 | 0.7    | -0.525  | 1.5938 | -0.25   | 0.5913 | 16.0364 | 0.0985 | -0.7418 |
| 4/22/2019 4:10 | 0.6167 | -0.1917 | 1.3205 | -0.325  | 0.5913 | 16.08   | 0.0806 | -0.7418 |
| 4/22/2019 4:11 | 0.6    | -0.175  | 1.2527 | -0.225  | 0.5913 | 15.8546 | 0.0942 | -0.7418 |
| 4/22/2019 4:12 | 0.6    | -0.5833 | 1.2427 | -0.55   | 0.5913 | 15.475  | 0.0889 | -0.7418 |
| 4/22/2019 4:13 | 0.6    | 0.3917  | 1.2478 | -0.675  | 0.5913 | 14.62   | 0.1024 | -0.7418 |
| 4/22/2019 4:14 | 0.6    | 0.7667  | 1.3246 | 0       | 0.5913 | 14.1182 | 0.0935 | -0.7418 |
| 4/22/2019 4:15 | 0.6    | 0.025   | 1.4554 | -0.7333 | 0.5913 | 13.72   | 0.0907 | -0.7418 |
| 4/22/2019 4:16 | 0.6667 | -0.2    | 1.3753 | -0.5667 | 0.5913 | 13.5273 | 0.0981 | -0.7418 |

|                |        |         |        |         |        |         |        |         |
|----------------|--------|---------|--------|---------|--------|---------|--------|---------|
| 4/22/2019 4:17 | 0.6    | -0.1917 | 1.3584 | -0.35   | 0.5913 | 13.13   | 0.0882 | -0.7418 |
| 4/22/2019 4:18 | 0.6    | 0.1917  | 1.2024 | 0.0667  | 0.5913 | 12.66   | 0.0924 | -0.7418 |
| 4/22/2019 4:19 | 0.6    | 0.0167  | 1.3023 | -0.425  | 0.5913 | 12.8556 | 0.0968 | -0.7418 |
| 4/22/2019 4:20 | 0.6    | 0.1167  | 1.3956 | -0.35   | 0.5913 | 13.25   | 0.0888 | -0.7418 |
| 4/22/2019 4:21 | 0.6083 | 0.0417  | 1.3391 | -0.4417 | 0.5913 | 13.1    | 0.1033 | -0.7418 |
| 4/22/2019 4:22 | 0.6083 | -0.2667 | 1.3464 | -0.6917 | 0.5913 | 13.2182 | 0.0921 | -0.7418 |
| 4/22/2019 4:23 | 0.6833 | 0.5833  | 1.1753 | -0.5917 | 0.5913 | 13.5    | 0.0931 | -0.7418 |
| 4/22/2019 4:24 | 0.6667 | -0.2    | 1.324  | -0.65   | 0.5913 | 13.4444 | 0.1021 | -0.7418 |
| 4/22/2019 4:25 | 0.6    | -0.4833 | 1.3768 | -0.2333 | 0.5913 | 14.01   | 0.0874 | -0.7418 |
| 4/22/2019 4:26 | 0.6    | -0.5917 | 1.372  | -0.4583 | 0.5913 | 14.1222 | 0.1061 | -0.7418 |
| 4/22/2019 4:27 | 0.575  | -0.3833 | 1.0879 | -0.5583 | 0.5913 | 13.9    | 0.0934 | -0.7418 |
| 4/22/2019 4:28 | 0.5333 | -0.5583 | 1.2214 | -0.3833 | 0.5913 | 14      | 0.0828 | -0.7418 |
| 4/22/2019 4:29 | 0.5167 | 0.2417  | 1.1735 | -0.2833 | 0.5913 | 14.0636 | 0.1031 | -0.7418 |
| 4/22/2019 4:30 | 0.5    | -0.2417 | 0.989  | -0.6083 | 0.5913 | 14.3333 | 0.0924 | -0.7418 |
| 4/22/2019 4:31 | 0.5    | -0.1    | 1.1538 | -0.9583 | 0.5913 | 13.9909 | 0.1007 | -0.7418 |
| 4/22/2019 4:32 | 0.5    | -0.1833 | 1.2768 | -0.35   | 0.5913 | 13.3    | 0.1034 | -0.7418 |
| 4/22/2019 4:33 | 0.5    | -0.2667 | 0.9622 | -0.3167 | 0.5913 | 12.8455 | 0.086  | -0.7418 |
| 4/22/2019 4:34 | 0.5    | -0.1    | 1.0223 | -0.0083 | 0.5913 | 12.7    | 0.1006 | -0.7418 |
| 4/22/2019 4:35 | 0.4333 | -0.2333 | 1.1244 | -0.1167 | 0.5913 | 12.41   | 0.0887 | -0.7418 |
| 4/22/2019 4:36 | 0.4    | 0.2333  | 1.2312 | -0.1    | 0.5913 | 12.0444 | 0.0997 | -0.7418 |
| 4/22/2019 4:37 | 0.4    | -0.3    | 1.316  | -0.5333 | 0.5913 | 11.8    | 0.0962 | -0.7418 |
| 4/22/2019 4:38 | 0.35   | 0.475   | 1.3776 | -0.5667 | 0.5913 | 12.25   | 0.0928 | -0.7418 |
| 4/22/2019 4:39 | 0.3833 | 0.4333  | 1.258  | -0.5167 | 0.5913 | 12.9818 | 0.103  | -0.7418 |
| 4/22/2019 4:40 | 0.4    | -0.0833 | 1.359  | -0.0333 | 0.5913 | 13.45   | 0.0994 | -0.7418 |
| 4/22/2019 4:41 | 0.4    | 0.6833  | 1.3928 | -0.3    | 0.5913 | 14.1273 | 0.0932 | -0.7418 |
| 4/22/2019 4:42 | 0.4    | -1.0833 | 1.1206 | 0.0667  | 0.5913 | 14.96   | 0.1032 | -0.7418 |
| 4/22/2019 4:43 | 0.4    | -0.15   | 1.3101 | -0.2    | 0.5913 | 15.5909 | 0.0941 | -0.7418 |
| 4/22/2019 4:44 | 0.4    | -0.3583 | 0.9385 | 0.1833  | 0.5913 | 16.4125 | 0.1028 | -0.7418 |
| 4/22/2019 4:45 | 0.4    | -0.125  | 1.001  | -0.5167 | 0.5913 | 16.875  | 0.0923 | -0.7418 |
| 4/22/2019 4:46 | 0.3583 | -0.3583 | 1.0934 | -0.6083 | 0.5913 | 16.8111 | 0.1038 | -0.7418 |
| 4/22/2019 4:47 | 0.325  | 0.2083  | 0.8949 | -0.2917 | 0.5913 | 17.3636 | 0.1014 | -0.7418 |
| 4/22/2019 4:48 | 0.4    | -1.1583 | 1.2464 | -0.3583 | 0.5913 | 18.02   | 0.0945 | -0.7418 |
| 4/22/2019 4:49 | 0.4    | -0.4417 | 1.2595 | -0.6417 | 0.5913 | 18.475  | 0.109  | -0.7418 |
| 4/22/2019 4:50 | 0.4    | -0.875  | 1.3128 | -0.025  | 0.5913 | 17.6778 | 0.0952 | -0.7418 |
| 4/22/2019 4:51 | 0.3    | -0.9917 | 1.3039 | -0.6417 | 0.5913 | 16.3909 | 0.0994 | -0.7418 |
| 4/22/2019 4:52 | 0.4    | -0.3833 | 1.2568 | -0.5167 | 0.5913 | 15.42   | 0.1074 | -0.7418 |
| 4/22/2019 4:53 | 0.4    | -0.1667 | 1.0564 | -0.325  | 0.5913 | 14.3167 | 0.0958 | -0.7418 |
| 4/22/2019 4:54 | 0.4    | -0.675  | 1.0559 | -0.4    | 0.5913 | 13.01   | 0.1112 | -0.7418 |
| 4/22/2019 4:55 | 0.4    | -0.65   | 1.4449 | -0.725  | 0.5913 | 12.17   | 0.102  | -0.7418 |
| 4/22/2019 4:56 | 0.4333 | -0.5833 | 1.1009 | -0.675  | 0.5913 | 12.3444 | 0.1015 | -0.7418 |
| 4/22/2019 4:57 | 0.5    | 0.0417  | 1.0479 | -0.5417 | 0.5913 | 12.21   | 0.1125 | -0.7418 |
| 4/22/2019 4:58 | 0.5    | -0.3833 | 1.0336 | -0.4833 | 0.5913 | 12.0444 | 0.0999 | -0.7418 |
| 4/22/2019 4:59 | 0.5    | -0.6167 | 1.1918 | -0.3167 | 0.5913 | 11.1909 | 0.1129 | -0.7418 |
| 4/22/2019 5:00 | 0.5    | -0.375  | 1.1893 | 0.2083  | 0.5913 | 10.1    | 0.0899 | -0.7418 |
| 4/22/2019 5:01 | 0.5    | -0.875  | 1.1596 | -0.3917 | 0.5913 | 9.68    | 0.0998 | -0.7418 |
| 4/22/2019 5:02 | 0.5    | -0.325  | 0.9285 | -0.1667 | 0.5913 | 10.5182 | 0.1053 | -0.7418 |
| 4/22/2019 5:03 | 0.5    | 0.2     | 0.9399 | -0.1333 | 0.5913 | 11.55   | 0.0922 | -0.7418 |

|                |        |         |        |         |        |         |        |         |
|----------------|--------|---------|--------|---------|--------|---------|--------|---------|
| 4/22/2019 5:04 | 0.5    | -0.2917 | 1.1223 | -0.7417 | 0.5913 | 12.4364 | 0.1014 | -0.7418 |
| 4/22/2019 5:05 | 0.4833 | -0.0917 | 1.0554 | -0.4667 | 0.5913 | 12.81   | 0.0938 | -0.7418 |
| 4/22/2019 5:06 | 0.4917 | -0.425  | 1.2443 | -0.5167 | 0.5913 | 13.42   | 0.0957 | -0.7418 |
| 4/22/2019 5:07 | 0.5    | -0.675  | 1.2896 | -0.4667 | 0.5913 | 13.88   | 0.1063 | -0.7418 |
| 4/22/2019 5:08 | 0.5    | -0.625  | 1.041  | -0.3167 | 0.5913 | 13.38   | 0.0932 | -0.7418 |
| 4/22/2019 5:09 | 0.5    | -0.05   | 0.9589 | -0.0667 | 0.5913 | 12.9273 | 0.0984 | -0.7418 |
| 4/22/2019 5:10 | 0.475  | -0.75   | 1.1059 | -0.1917 | 0.5913 | 13.52   | 0.0984 | -0.7418 |
| 4/22/2019 5:11 | 0.4417 | -0.0083 | 1.0995 | -0.3583 | 0.5913 | 14.5333 | 0.0871 | -0.7418 |
| 4/22/2019 5:12 | 0.5    | -0.7167 | 1.0286 | 0.1917  | 0.5913 | 15.63   | 0.0963 | -0.7418 |
| 4/22/2019 5:13 | 0.5583 | 0.05    | 1.079  | -0.7167 | 0.5913 | 16.1    | 0.0888 | -0.7418 |
| 4/22/2019 5:14 | 0.5417 | -0.0167 | 1.2887 | -0.05   | 0.5913 | 15.98   | 0.0988 | -0.7418 |
| 4/22/2019 5:15 | 0.5    | -0.1333 | 1.2758 | 0.05    | 0.5913 | 15.7    | 0.0969 | -0.7418 |
| 4/22/2019 5:16 | 0.4667 | 0.075   | 1.2945 | 0.0917  | 0.5913 | 15.49   | 0.0811 | -0.7418 |
| 4/22/2019 5:17 | 0.5    | -0.15   | 1.1652 | -0.275  | 0.5913 | 16.0333 | 0.0945 | -0.7418 |
| 4/22/2019 5:18 | 0.5    | -0.3083 | 1.056  | -0.3667 | 0.5913 | 16.6    | 0.0994 | -0.7418 |
| 4/22/2019 5:19 | 0.5    | -1.1083 | 0.6094 | -0.3417 | 0.5913 | 17.02   | 0.0862 | -0.7418 |
| 4/22/2019 5:20 | 0.5    | -0.6333 | 1.4482 | -0.6    | 0.5913 | 17.17   | 0.086  | -0.7418 |
| 4/22/2019 5:21 | 0.5    | -0.875  | 1.1161 | 0.0167  | 0.5913 | 17.8455 | 0.0947 | -0.7418 |
| 4/22/2019 5:22 | 0.525  | -0.25   | 1.0539 | -0.1083 | 0.5913 | 17.77   | 0.0827 | -0.7418 |
| 4/22/2019 5:23 | 0.5    | -1.1917 | 0.872  | -0.8    | 0.5913 | 17.61   | 0.1042 | -0.7418 |
| 4/22/2019 5:24 | 0.5083 | -0.6833 | 0.8825 | -0.1833 | 0.5913 | 17.65   | 0.0882 | -0.7418 |
| 4/22/2019 5:25 | 0.55   | 0.2333  | 0.988  | -0.3333 | 0.5913 | 17.68   | 0.0949 | -0.7418 |
| 4/22/2019 5:26 | 0.5667 | 0.175   | 1.1623 | -0.6667 | 0.5913 | 17.6364 | 0.0961 | -0.7418 |
| 4/22/2019 5:27 | 0.5583 | 0.0417  | 1.0889 | -0.5917 | 0.5913 | 17.5    | 0.0816 | -0.7418 |
| 4/22/2019 5:28 | 0.5167 | -0.0917 | 1.0817 | -1.1417 | 0.5913 | 17.89   | 0.0922 | -0.7418 |
| 4/22/2019 5:29 | 0.6    | -0.5833 | 1.0395 | -0.45   | 0.5913 | 17.94   | 0.0862 | -0.7418 |
| 4/22/2019 5:30 | 0.6    | 0.2833  | 1.0275 | -0.4833 | 0.5913 | 17.98   | 0.0836 | -0.7418 |
| 4/22/2019 5:31 | 0.6    | 0.05    | 1.0229 | -0.5917 | 0.5913 | 17.55   | 0.1039 | -0.7418 |
| 4/22/2019 5:32 | 0.5667 | -0.425  | 1.0516 | -0.2417 | 0.5913 | 17.6182 | 0.0934 | -0.7418 |
| 4/22/2019 5:33 | 0.6    | -0.6667 | 0.9026 | -0.3    | 0.5913 | 17.48   | 0.0944 | -0.7418 |
| 4/22/2019 5:34 | 0.6    | -0.3083 | 0.8372 | -0.45   | 0.5913 | 17.4818 | 0.0997 | -0.7418 |
| 4/22/2019 5:35 | 0.5833 | -0.6417 | 0.9923 | -0.7083 | 0.5913 | 17.3333 | 0.0768 | -0.7418 |
| 4/22/2019 5:36 | 0.5667 | 0.25    | 1.0904 | -0.5417 | 0.5913 | 16.89   | 0.0956 | -0.7418 |
| 4/22/2019 5:37 | 0.5    | -0.4167 | 1.3044 | -0.9    | 0.5913 | 16.82   | 0.0913 | -0.7418 |
| 4/22/2019 5:38 | 0.5    | -0.15   | 1.126  | -0.725  | 0.5913 | 16.77   | 0.0856 | -0.7418 |
| 4/22/2019 5:39 | 0.5    | -0.1333 | 1.0995 | -0.4833 | 0.5913 | 16.9667 | 0.0992 | -0.7418 |
| 4/22/2019 5:40 | 0.5083 | -0.5167 | 1.2322 | -0.675  | 0.5913 | 16.82   | 0.0829 | -0.7418 |
| 4/22/2019 5:41 | 0.525  | -0.4917 | 0.7483 | -0.3833 | 0.5913 | 16.93   | 0.105  | -0.7418 |
| 4/22/2019 5:42 | 0.5    | -0.125  | 1.1381 | -0.5333 | 0.5913 | 17.1    | 0.1006 | -0.7418 |
| 4/22/2019 5:43 | 0.5    | -0.25   | 1.2096 | -0.2917 | 0.5913 | 17.3111 | 0.0896 | -0.7418 |
| 4/22/2019 5:44 | 0.5917 | -0.2    | 1.0251 | -0.675  | 0.5913 | 17.85   | 0.1061 | -0.7418 |
| 4/22/2019 5:45 | 0.6    | -0.2917 | 1.0184 | -0.05   | 0.5913 | 18.1182 | 0.0964 | -0.7418 |
| 4/22/2019 5:46 | 0.6    | -0.025  | 1.0096 | -0.1583 | 0.5913 | 17.94   | 0.0995 | -0.7418 |
| 4/22/2019 5:47 | 0.6    | 0.05    | 0.833  | -0.35   | 0.5913 | 17.9546 | 0.1049 | -0.7418 |
| 4/22/2019 5:48 | 0.625  | -0.5083 | 1.1357 | -0.8    | 0.5913 | 18.37   | 0.0936 | -0.7418 |
| 4/22/2019 5:49 | 0.7    | -0.625  | 1.1233 | -0.8333 | 0.5913 | 18.76   | 0.1069 | -0.7418 |
| 4/22/2019 5:50 | 0.7    | 0.3833  | 1.0958 | -0.6167 | 0.5913 | 18.86   | 0.1037 | -0.7418 |



|                |        |         |        |         |        |         |        |         |
|----------------|--------|---------|--------|---------|--------|---------|--------|---------|
| 4/22/2019 5:51 | 0.7    | -0.7333 | 0.851  | -0.35   | 0.5913 | 18.78   | 0.091  | -0.7418 |
| 4/22/2019 5:52 | 0.7167 | -0.35   | 0.8619 | 0.125   | 0.5913 | 18.73   | 0.1072 | -0.7418 |
| 4/22/2019 5:53 | 0.7083 | 0.0583  | 0.9278 | -0.1917 | 0.5913 | 18.6273 | 0.0941 | -0.7418 |
| 4/22/2019 5:54 | 0.7    | -0.1833 | 0.9553 | -0.3167 | 0.5913 | 18.5    | 0.0994 | -0.7418 |
| 4/22/2019 5:55 | 0.7    | -0.6083 | 0.8463 | -0.575  | 0.5913 | 18.1583 | 0.1028 | -0.7418 |
| 4/22/2019 5:56 | 0.7    | -0.375  | 1.0274 | -0.0417 | 0.5913 | 17.68   | 0.1    | -0.7418 |
| 4/22/2019 5:57 | 0.775  | -0.0667 | 0.9246 | -0.325  | 0.5913 | 17.3273 | 0.1096 | -0.7418 |
| 4/22/2019 5:58 | 0.7917 | -0.4167 | 0.9919 | -0.6917 | 0.5913 | 17.13   | 0.0904 | -0.7418 |
| 4/22/2019 5:59 | 0.7833 | -0.1667 | 1.0124 | -0.6583 | 0.5913 | 17.0727 | 0.1074 | -0.7418 |
| 4/22/2019 6:00 | 0.7083 | -0.3    | 1.1102 | -0.3917 | 0.5913 | 16.7273 | 0.1152 | -0.7418 |
| 4/22/2019 6:01 | 0.7    | -0.5333 | 1.102  | -0.4667 | 0.5913 | 16.3636 | 0.0973 | -0.7418 |
| 4/22/2019 6:02 | 0.7    | -0.3167 | 0.8126 | -0.4333 | 0.5913 | 16.12   | 0.1115 | -0.7418 |
| 4/22/2019 6:03 | 0.7    | 0.3667  | 0.7819 | -0.1417 | 0.5913 | 16.18   | 0.1103 | -0.7418 |
| 4/22/2019 6:04 | 0.6    | 0.1667  | 1.2206 | -0.4333 | 0.5913 | 16.51   | 0.1096 | -0.7418 |
| 4/22/2019 6:05 | 0.6    | -0.725  | 0.8485 | -0.275  | 0.5913 | 17.0556 | 0.1133 | -0.7418 |
| 4/22/2019 6:06 | 0.6    | 0.25    | 1.0621 | -0.3917 | 0.5913 | 17.3909 | 0.1076 | -0.7418 |
| 4/22/2019 6:07 | 0.6    | 0.0167  | 0.8595 | -0.3417 | 0.5913 | 17.5091 | 0.1107 | -0.7418 |
| 4/22/2019 6:08 | 0.6    | -0.5167 | 1.0826 | -0.1    | 0.5913 | 17.8556 | 0.1167 | -0.7418 |
| 4/22/2019 6:09 | 0.6    | 0.0333  | 0.9201 | -0.8167 | 0.5913 | 18.4273 | 0.1072 | -0.7418 |
| 4/22/2019 6:10 | 0.5417 | 0.2917  | 0.8335 | -1.0667 | 0.5913 | 18.89   | 0.1216 | -0.7418 |
| 4/22/2019 6:11 | 0.4417 | -0.2333 | 1.2708 | -0.4    | 0.5913 | 18.9727 | 0.1062 | -0.7418 |
| 4/22/2019 6:12 | 0.4    | -0.4083 | 1.2033 | -0.1083 | 0.5913 | 19.3167 | 0.1168 | -0.7418 |
| 4/22/2019 6:13 | 0.375  | -0.6583 | 1.0117 | -0.5583 | 0.5913 | 19.9273 | 0.1213 | -0.7418 |
| 4/22/2019 6:14 | 0.4    | -0.2667 | 0.9881 | -0.375  | 0.5913 | 20.4917 | 0.1058 | -0.7418 |
| 4/22/2019 6:15 | 0.4    | -0.1833 | 0.7832 | -0.2667 | 0.5913 | 20.76   | 0.1218 | -0.7418 |
| 4/22/2019 6:16 | 0.4    | 0.0083  | 1.0305 | 0.0083  | 0.5913 | 21.075  | 0.1081 | -0.7418 |
| 4/22/2019 6:17 | 0.4    | -0.425  | 1.1742 | 0.1333  | 0.5913 | 20.7727 | 0.1168 | -0.7418 |
| 4/22/2019 6:18 | 0.4167 | 0.0333  | 0.0168 | 0.3167  | 0.5913 | 20.3917 | 0.1097 | -0.7418 |
| 4/22/2019 6:19 | 0.4    | 1.1833  | 0.914  | -0.6333 | 0.5913 | 20.4546 | 0.1049 | -0.7418 |
| 4/22/2019 6:20 | 0.4    | 0.05    | 1.0351 | -0.175  | 0.5913 | 20.3    | 0.1261 | -0.7418 |
| 4/22/2019 6:21 | 0.4    | 0.2833  | 1.1995 | -0.4    | 0.5913 | 19.97   | 0.1222 | -0.7418 |
| 4/22/2019 6:22 | 0.4    | 0.2917  | 1.268  | -0.7    | 0.5913 | 19.8583 | 0.1052 | -0.7418 |
| 4/22/2019 6:23 | 0.4667 | 0.675   | 0.9676 | -0.225  | 0.5913 | 20.2583 | 0.1209 | -0.7418 |
| 4/22/2019 6:24 | 0.5    | -0.6333 | 1.2025 | -0.5417 | 0.5913 | 20.2    | 0.1179 | -0.7418 |
| 4/22/2019 6:25 | 0.5    | 0.3333  | 1.204  | -0.375  | 0.5913 | 20.3111 | 0.1138 | -0.7418 |
| 4/22/2019 6:26 | 0.5    | 0.4417  | 1.1352 | -0.2417 | 0.5913 | 20.1667 | 0.1273 | -0.7418 |
| 4/22/2019 6:27 | 0.5    | -0.125  | 1.0942 | -0.4167 | 0.5913 | 20.1889 | 0.1111 | -0.7418 |
| 4/22/2019 6:28 | 0.5    | 0.475   | 0.8402 | -0.3    | 0.5913 | 20.3778 | 0.1318 | -0.7418 |
| 4/22/2019 6:29 | 0.5    | 0.1833  | 1.2009 | -0.6    | 0.5913 | 20.3909 | 0.1188 | -0.7418 |
| 4/22/2019 6:30 | 0.5    | 0.35    | 1.1168 | -0.3083 | 0.5913 | 19.9546 | 0.1187 | -0.7418 |
| 4/22/2019 6:31 | 0.5    | 0.4     | 0.8335 | -0.1583 | 0.5913 | 19.42   | 0.1301 | -0.7418 |
| 4/22/2019 6:32 | 0.5    | 0.8917  | 1.0802 | 0.1417  | 0.5913 | 19.2273 | 0.1192 | -0.7418 |
| 4/22/2019 6:33 | 0.5    | -0.4667 | 1.0925 | 0.025   | 0.5913 | 18.7727 | 0.1255 | -0.7418 |
| 4/22/2019 6:34 | 0.5    | -0.3167 | 0.9566 | -0.4917 | 0.5913 | 18.2    | 0.1242 | -0.7418 |
| 4/22/2019 6:35 | 0.4833 | 0.575   | 1.1757 | -0.55   | 0.5913 | 17.89   | 0.1133 | -0.7418 |
| 4/22/2019 6:36 | 0.5    | 0.225   | 1.0366 | -0.275  | 0.5913 | 18.29   | 0.1311 | -0.7418 |
| 4/22/2019 6:37 | 0.5    | 0.1     | 1.0438 | -0.2667 | 0.5913 | 18.5182 | 0.1173 | -0.7418 |

|                |        |         |          |          |        |          |        |         |
|----------------|--------|---------|----------|----------|--------|----------|--------|---------|
| 4/22/2019 6:38 | 0.5    | 0.1667  | 1.1777   | 0.2      | 0.5913 | 18.35    | 0.122  | -0.7418 |
| 4/22/2019 6:39 | 0.5    | 1.0417  | 1.1701   | -0.2583  | 0.5913 | 18.4273  | 0.1297 | -0.7418 |
| 4/22/2019 6:40 | 0.5    | 0.0917  | 1.0802   | 0.0167   | 0.5913 | 18.62    | 0.1222 | -0.7418 |
| 4/22/2019 6:41 | 0.4667 | 0.1667  | 0.9297   | -0.575   | 0.5913 | 19.1545  | 0.1331 | -0.7418 |
| 4/22/2019 6:42 | 0.5    | 0.3667  | 1.0553   | -0.3333  | 0.5913 | 19.8889  | 0.1198 | -0.7418 |
| 4/22/2019 6:43 | 0.5    | 0.5583  | 1.1441   | 0.2667   | 0.5913 | 20.61    | 0.128  | -0.7418 |
| 4/22/2019 6:44 | 0.5    | 0.975   | 1.1967   | -0.1083  | 0.5913 | 21.3667  | 0.1298 | -0.7418 |
| 4/22/2019 6:45 | 0.5    | 0.9917  | 1.0625   | -0.025   | 0.5913 | 22.1455  | 0.1177 | -0.7418 |
| 4/22/2019 6:46 | 0.5    | 0.2167  | 0.8855   | 0.0917   | 0.5913 | 23.1889  | 0.1316 | -0.7418 |
| 4/22/2019 6:47 | 0.5833 | -0.025  | 0.9792   | -0.0583  | 0.5913 | 23.8     | 0.1179 | -0.7418 |
| 4/22/2019 6:48 | 0.6    | 0.8583  | 1.1882   | -0.3583  | 0.5913 | 23.7111  | 0.1264 | -0.7418 |
| 4/22/2019 6:49 | 0.6    | 0.2917  | 1.0113   | -0.475   | 0.5913 | 23.71    | 0.1302 | -0.7418 |
| 4/22/2019 6:50 | 0.6    | 0.4833  | 1.1367   | -0.35    | 0.5913 | 23.79    | 0.1181 | -0.7418 |
| 4/22/2019 6:51 | 0.6    | 0.9583  | 1.2323   | 0.05     | 0.5913 | 23.8889  | 0.1316 | -0.7418 |
| 4/22/2019 6:52 | 0.6    | 0.3083  | 1.4238   | -0.5667  | 0.5913 | 23.6273  | 0.1249 | -0.7418 |
| 4/22/2019 6:53 | 0.6    | 0.2667  | 0.8049   | -0.525   | 0.5913 | 23.19    | 0.1202 | -0.7418 |
| 4/22/2019 6:54 | 0.6    | 0.325   | 1.1445   | -0.425   | 0.5913 | 22.7636  | 0.1281 | -0.7418 |
| 4/22/2019 6:55 | 0.6083 | 1.0583  | 1.2493   | -0.7167  | 0.5913 | 23.08    | 0.1185 | -0.7418 |
| 4/22/2019 6:56 | 0.675  | 0.525   | 1.2207   | -0.1167  | 0.5913 | 23.05    | 0.1268 | -0.7418 |
| 4/22/2019 6:57 | 0.7    | 1.025   | 1.1878   | -0.1083  | 0.5913 | 22.6364  | 0.1235 | -0.7418 |
| 4/22/2019 6:58 | 0.65   | 0.2667  | 0.957    | -0.7167  | 0.5913 | 22.5667  | 0.1162 | -0.7418 |
| 4/22/2019 6:59 | 0.7    | 0.4     | 1.1646   | -0.7     | 0.5913 | 22.84    | 0.1264 | -0.7418 |
| 4/22/2019 7:00 | 0.7667 | 0.35    | 0.9997   | -0.875   | 0.5913 | 23       | 0.1196 | -0.7418 |
| 4/22/2019 7:01 | 0.8    | 0.7917  | 1.2908   | -0.2     | 0.5913 | 22.66    | 0.1261 | -0.7418 |
| 4/22/2019 7:02 | 0.8    | 0.9917  | 1.902    | 0.4333   | 0.5913 | 22.3083  | 0.1388 | -0.7418 |
| 4/22/2019 7:03 | 0.7917 | 1.8417  | 6.2224   | 1.625    | 0.5913 | 23.13    | 0.1792 | -0.7418 |
| 4/22/2019 7:04 | 0.8    | 12.65   | 62.5175  | 44.175   | 0.5913 | 96.7455  | 0.6731 | -0.7418 |
| 4/22/2019 7:05 | 0.8    | 16.0833 | 111.6967 | 81.6083  | 0.5913 | 136.89   | 1.1908 | -0.7418 |
| 4/22/2019 7:06 | 0.8    | 17.825  | 171.1917 | 131.2583 | 0.5913 | 138.0818 | 1.6537 | -0.7418 |
| 4/22/2019 7:07 | 0.8    | 15.1417 | 172.9333 | 134.5417 | 0.5913 | 164.07   | 1.8868 | -0.7418 |
| 4/22/2019 7:08 | 0.8    | 17.125  | 167.725  | 128.2917 | 0.5913 | 160.2455 | 1.87   | -0.7418 |
| 4/22/2019 7:09 | 0.8    | 17.675  | 175.4583 | 134.725  | 0.5913 | 175.5636 | 2.0717 | -0.7418 |
| 4/22/2019 7:10 | 0.7667 | 17.6333 | 179.4417 | 138.7917 | 0.5913 | 178.88   | 2.2217 | -0.7418 |
| 4/22/2019 7:11 | 0.7833 | 17.5333 | 180.5167 | 139.2083 | 0.5913 | 178.8364 | 2.3543 | -0.7418 |
| 4/22/2019 7:12 | 0.7417 | 17.5833 | 177.4833 | 137.4917 | 0.5913 | 176.1667 | 2.5008 | -0.7418 |
| 4/22/2019 7:13 | 0.75   | 16.2083 | 176.2417 | 136.7583 | 0.5913 | 178.54   | 2.5528 | -0.7418 |
| 4/22/2019 7:14 | 0.7    | 16.45   | 175.3833 | 137.3417 | 0.5913 | 184.52   | 2.6059 | -0.7418 |
| 4/22/2019 7:15 | 0.7    | 16.8417 | 176.0917 | 137.95   | 0.5913 | 183.61   | 2.7105 | -0.7418 |
| 4/22/2019 7:16 | 0.7    | 17.0167 | 173.8083 | 137.0833 | 0.5913 | 182.7222 | 2.7451 | -0.7418 |
| 4/22/2019 7:17 | 0.7    | 16.4167 | 171.6    | 135.0917 | 0.5913 | 182.2444 | 2.7578 | -0.7418 |
| 4/22/2019 7:18 | 0.7    | 16.65   | 169.575  | 133.85   | 0.5913 | 181.95   | 2.7784 | -0.7418 |
| 4/22/2019 7:19 | 0.7    | 16.6917 | 168.8333 | 133.4167 | 0.5913 | 175.5818 | 2.7682 | -0.7418 |
| 4/22/2019 7:20 | 0.7    | 15.7667 | 166.175  | 132.375  | 0.5913 | 134.1917 | 2.7659 | -0.7418 |
| 4/22/2019 7:21 | 0.625  | 16.5    | 164.575  | 130.5833 | 0.5913 | 131.63   | 2.7596 | -0.7418 |
| 4/22/2019 7:22 | 0.55   | 15.5083 | 163.375  | 129.5417 | 0.5913 | 151.25   | 2.7368 | -0.7418 |
| 4/22/2019 7:23 | 0.525  | 15.4    | 161.5417 | 127.9    | 0.5913 | 163.4417 | 2.7367 | -0.7418 |
| 4/22/2019 7:24 | 0.5    | 15.275  | 159.125  | 126.6333 | 0.5913 | 148.5364 | 2.7038 | -0.7418 |

|                |        |         |          |          |        |          |        |         |
|----------------|--------|---------|----------|----------|--------|----------|--------|---------|
| 4/22/2019 7:25 | 0.5333 | 16.0667 | 157.4    | 126.0667 | 0.5913 | 143.39   | 2.6954 | -0.7418 |
| 4/22/2019 7:26 | 0.5583 | 15.475  | 155.95   | 124.1667 | 0.5913 | 165.75   | 2.6962 | -0.7418 |
| 4/22/2019 7:27 | 0.6    | 15.7083 | 154.3833 | 123.625  | 0.5913 | 163.9273 | 2.6645 | -0.7418 |
| 4/22/2019 7:28 | 0.6    | 15.2583 | 152.3    | 122.2083 | 0.5913 | 162      | 2.6398 | -0.7418 |
| 4/22/2019 7:29 | 0.6    | 15.475  | 151.225  | 120.6417 | 0.5913 | 156.9333 | 2.632  | -0.7418 |
| 4/22/2019 7:30 | 0.6    | 14.2917 | 148.95   | 120.0917 | 0.5913 | 140.6455 | 2.6032 | -0.7418 |
| 4/22/2019 7:31 | 0.6    | 14.1583 | 148.2333 | 119.3667 | 0.5913 | 145.1417 | 2.6043 | -0.7418 |
| 4/22/2019 7:32 | 0.625  | 13.9583 | 144.2583 | 117.6083 | 0.5913 | 157.98   | 2.5696 | -0.7418 |
| 4/22/2019 7:33 | 0.7    | 14.1667 | 142.7    | 115.7083 | 0.5913 | 157.25   | 2.5467 | -0.7418 |
| 4/22/2019 7:34 | 0.7    | 14.6167 | 142.6083 | 115.0833 | 0.5913 | 156.02   | 2.5508 | -0.7418 |
| 4/22/2019 7:35 | 0.7    | 13.825  | 140.2833 | 113.5    | 0.5913 | 151.525  | 2.5153 | -0.7418 |
| 4/22/2019 7:36 | 0.725  | 13.8333 | 139.325  | 113.3    | 0.5913 | 152.5    | 2.5173 | -0.7418 |
| 4/22/2019 7:37 | 0.7583 | 13.65   | 138.7833 | 112.5583 | 0.5913 | 152.9818 | 2.4968 | -0.7418 |
| 4/22/2019 7:38 | 0.8    | 13.1583 | 136.7167 | 110.9583 | 0.5913 | 147.4454 | 2.4678 | -0.7418 |
| 4/22/2019 7:39 | 0.725  | 14.0333 | 134.95   | 109.65   | 0.5913 | 114.625  | 2.4688 | -0.7418 |
| 4/22/2019 7:40 | 0.7417 | 12.875  | 134.2167 | 108.4167 | 0.5913 | 119.0545 | 2.4409 | -0.7418 |
| 4/22/2019 7:41 | 0.7    | 13.9083 | 132.95   | 108.5583 | 0.5913 | 120.1909 | 2.4468 | -0.7418 |
| 4/22/2019 7:42 | 0.7    | 12.6583 | 131.8083 | 107.4833 | 0.5913 | 105.4583 | 2.4305 | -0.7418 |
| 4/22/2019 7:43 | 0.7    | 13.1333 | 130.7333 | 106.9583 | 0.5913 | 102.88   | 2.4042 | -0.7418 |
| 4/22/2019 7:44 | 0.7    | 12.95   | 130.1417 | 105.8833 | 0.5913 | 103.3    | 2.4144 | -0.7418 |
| 4/22/2019 7:45 | 0.7    | 12.7333 | 128.2583 | 104.175  | 0.5913 | 102.94   | 2.378  | -0.7418 |
| 4/22/2019 7:46 | 0.7    | 12.175  | 127.4333 | 104.3083 | 0.5913 | 103.7091 | 2.3736 | -0.7418 |
| 4/22/2019 7:47 | 0.6833 | 12.4667 | 126.5333 | 103.2833 | 0.5913 | 104.8833 | 2.3755 | -0.7418 |
| 4/22/2019 7:48 | 0.675  | 12.4917 | 124.8417 | 102.5333 | 0.5913 | 105.5833 | 2.3413 | -0.7418 |
| 4/22/2019 7:49 | 0.6    | 12.6833 | 123.45   | 101.0083 | 0.5913 | 105.7727 | 2.3388 | -0.7418 |
| 4/22/2019 7:50 | 0.6    | 12.225  | 123.3083 | 100.65   | 0.5913 | 105.2667 | 2.3245 | -0.7418 |
| 4/22/2019 7:51 | 0.6    | 12.2    | 121.55   | 99.1     | 0.5913 | 105.4    | 2.3083 | -0.7418 |
| 4/22/2019 7:52 | 0.6    | 12.1833 | 120.425  | 98.875   | 0.5913 | 106.9083 | 2.3075 | -0.7418 |
| 4/22/2019 7:53 | 0.6    | 11.8667 | 119.7167 | 97.75    | 0.5913 | 108.82   | 2.2768 | -0.7418 |
| 4/22/2019 7:54 | 0.575  | 11.9833 | 119.175  | 97.175   | 0.5913 | 110.2    | 2.2837 | -0.7418 |
| 4/22/2019 7:55 | 0.5    | 11.4583 | 117.8083 | 95.6167  | 0.5913 | 111.4    | 2.2777 | -0.7418 |
| 4/22/2019 7:56 | 0.5    | 11.4917 | 116.775  | 95.325   | 0.5913 | 111.9333 | 2.2523 | -0.7418 |
| 4/22/2019 7:57 | 0.5    | 10.975  | 115.3333 | 94.1083  | 0.5913 | 112.49   | 2.2504 | -0.7418 |
| 4/22/2019 7:58 | 0.5667 | 11.0583 | 114.1    | 94.05    | 0.5913 | 111.5182 | 2.2225 | -0.7418 |
| 4/22/2019 7:59 | 0.6    | 10.8833 | 113.1167 | 92.7083  | 0.5913 | 109.8182 | 2.2177 | -0.7418 |
| 4/22/2019 8:00 | 0.6    | 10.8333 | 111.975  | 92.2667  | 0.5913 | 108.8364 | 2.2118 | -0.7418 |
| 4/22/2019 8:01 | 0.5333 | 11.1167 | 111.325  | 91.4583  | 0.5913 | 108.58   | 2.1892 | -0.7418 |
| 4/22/2019 8:02 | 0.6    | 10.2667 | 110.0083 | 90.1333  | 0.5913 | 108.975  | 2.1812 | -0.7418 |
| 4/22/2019 8:03 | 0.5167 | 10.4833 | 109.7    | 89.85    | 0.5913 | 109.5091 | 2.1805 | -0.7418 |
| 4/22/2019 8:04 | 0.525  | 10.7167 | 108.3833 | 89.0917  | 0.5913 | 108.5083 | 2.1509 | -0.7418 |
| 4/22/2019 8:05 | 0.5    | 10.65   | 107.4833 | 88.15    | 0.5913 | 106.9364 | 2.1619 | -0.7418 |
| 4/22/2019 8:06 | 0.5083 | 10.4417 | 106.85   | 87.1417  | 0.5913 | 105.25   | 2.0621 | -0.7418 |
| 4/22/2019 8:07 | 0.5917 | 10.4167 | 105.9167 | 86.8583  | 0.5913 | 104.9091 | 1.5318 | -0.7418 |
| 4/22/2019 8:08 | 0.6083 | 10.1833 | 104.4667 | 85.7667  | 0.5913 | 103.9833 | 1.4696 | -0.7418 |
| 4/22/2019 8:09 | 0.6917 | 10.4083 | 104.3    | 85.15    | 0.5913 | 103.6727 | 1.4446 | -0.7418 |
| 4/22/2019 8:10 | 0.7    | 9.5167  | 101.9667 | 84.3333  | 0.5913 | 102.7083 | 1.4496 | -0.7418 |
| 4/22/2019 8:11 | 0.7    | 10.1583 | 101.7333 | 84.2833  | 0.5913 | 101.9364 | 1.4392 | -0.7418 |

|                |        |         |          |         |        |          |        |         |
|----------------|--------|---------|----------|---------|--------|----------|--------|---------|
| 4/22/2019 8:12 | 0.7    | 9.25    | 102.1333 | 83.875  | 0.5913 | 101.8667 | 1.4282 | -0.7418 |
| 4/22/2019 8:13 | 0.7    | 10.0167 | 101.0333 | 83.5    | 0.5913 | 100.9818 | 1.4235 | -0.7418 |
| 4/22/2019 8:14 | 0.675  | 10.3333 | 100.005  | 81.9    | 0.5913 | 100.3636 | 1.4015 | -0.7418 |
| 4/22/2019 8:15 | 0.6167 | 9.6     | 99.0117  | 81.8    | 0.5913 | 100.1091 | 1.4056 | -0.7418 |
| 4/22/2019 8:16 | 0.625  | 9.3083  | 98.6083  | 81.3083 | 0.5913 | 99.0364  | 1.3933 | -0.7418 |
| 4/22/2019 8:17 | 0.6    | 8.7167  | 98.0767  | 81.1083 | 0.5913 | 97.7273  | 1.3775 | -0.7418 |
| 4/22/2019 8:18 | 0.6    | 8.7083  | 96.8583  | 80.2333 | 0.5913 | 97.6273  | 1.3893 | -0.7418 |
| 4/22/2019 8:19 | 0.6167 | 8.85    | 95.535   | 79.7167 | 0.5913 | 97.4     | 1.3649 | -0.7418 |
| 4/22/2019 8:20 | 0.7    | 8.95    | 95.5483  | 78.3833 | 0.5913 | 96.5636  | 1.3695 | -0.7418 |
| 4/22/2019 8:21 | 0.7    | 9.2417  | 95.1867  | 78.2583 | 0.5913 | 96.0583  | 1.3724 | -0.7418 |
| 4/22/2019 8:22 | 0.625  | 8.9833  | 93.8667  | 77.4917 | 0.5913 | 96.1083  | 1.3469 | -0.7418 |
| 4/22/2019 8:23 | 0.575  | 8.3667  | 92.3667  | 76.3917 | 0.5913 | 96.9     | 1.3469 | -0.7418 |
| 4/22/2019 8:24 | 0.5    | 8.2917  | 90.9967  | 75.3083 | 0.5913 | 96.7167  | 1.334  | -0.7418 |
| 4/22/2019 8:25 | 0.5    | 9.0167  | 89.3633  | 73.3333 | 0.5913 | 96.4167  | 1.3007 | -0.7418 |
| 4/22/2019 8:26 | 0.5    | 7.7167  | 81.245   | 68.1583 | 0.5913 | 96.4182  | 1.2488 | -0.7418 |
| 4/22/2019 8:27 | 0.4583 | 6.8333  | 73.8583  | 61.1083 | 0.5913 | 95.1818  | 1.1314 | -0.7418 |
| 4/22/2019 8:28 | 0.5    | 5.775   | 69.0967  | 57.5083 | 0.5913 | 94.2546  | 1.0742 | -0.7418 |
| 4/22/2019 8:29 | 0.5333 | 4.975   | 58.3133  | 49.25   | 0.5913 | 92.8889  | 0.9779 | -0.7418 |
| 4/22/2019 8:30 | 0.6417 | 3.9583  | 32.175   | 28.3333 | 0.5913 | 48.7818  | 0.6567 | -0.7418 |
| 4/22/2019 8:31 | 0.7833 | 5.9333  | 37.095   | 30.7833 | 0.5913 | 38.67    | 0.5767 | -0.7418 |
| 4/22/2019 8:32 | 0.8    | 4.1917  | 41.3833  | 35.0417 | 0.5913 | 53.8083  | 0.7143 | -0.7418 |
| 4/22/2019 8:33 | 0.8    | 4.0417  | 37.1167  | 33.125  | 0.5913 | 51.61    | 0.6642 | -0.7418 |
| 4/22/2019 8:34 | 0.775  | 3.85    | 35.4     | 30.6    | 0.5913 | 49.3667  | 0.6481 | -0.7418 |
| 4/22/2019 8:35 | 0.8    | 3.025   | 30.8467  | 26.0667 | 0.5913 | 39.7818  | 0.566  | -0.7418 |
| 4/22/2019 8:36 | 0.875  | 3.9417  | 25.875   | 20.8833 | 0.5913 | 38.5182  | 0.4659 | -0.7418 |
| 4/22/2019 8:37 | 0.9    | 2.2083  | 24.005   | 20.925  | 0.5913 | 36.46    | 0.4952 | -0.7418 |
| 4/22/2019 8:38 | 0.9833 | 3.1667  | 17.9217  | 15.125  | 0.5913 | 28.6167  | 0.3717 | -0.7418 |
| 4/22/2019 8:39 | 1      | 2.9333  | 19.9267  | 18.0417 | 0.5913 | 28.7909  | 0.4069 | -0.7418 |
| 4/22/2019 8:40 | 1      | 2.5917  | 21.0317  | 18.5333 | 0.5913 | 35.9818  | 0.4565 | -0.7418 |
| 4/22/2019 8:41 | 0.925  | 2.425   | 17.62    | 15.8417 | 0.5913 | 37.0546  | 0.392  | -0.7418 |
| 4/22/2019 8:42 | 0.8167 | 2.6333  | 16.955   | 14.4    | 0.5913 | 38.05    | 0.3616 | -0.7418 |
| 4/22/2019 8:43 | 0.8417 | 2.5917  | 14.9767  | 12.9083 | 0.5913 | 37.225   | 0.3446 | -0.7418 |
| 4/22/2019 8:44 | 0.825  | 2.6083  | 14.3233  | 12.825  | 0.5913 | 36.2727  | 0.3175 | -0.7418 |
| 4/22/2019 8:45 | 0.8667 | 2.3333  | 12.7567  | 12.2917 | 0.5913 | 35.2083  | 0.3164 | -0.7418 |
| 4/22/2019 8:46 | 0.875  | 2.15    | 10.2383  | 10.9833 | 0.5913 | 34.0636  | 0.2951 | -0.7418 |
| 4/22/2019 8:47 | 0.9    | 3.025   | 10.4618  | 10.1417 | 0.5913 | 32.97    | 0.2573 | -0.7418 |
| 4/22/2019 8:48 | 0.9    | 1.925   | 10.3258  | 9.7583  | 0.5913 | 32.0636  | 0.2825 | -0.7418 |
| 4/22/2019 8:49 | 0.875  | 2.1417  | 9.8138   | 9.3583  | 0.5913 | 30.8909  | 0.264  | -0.7418 |
| 4/22/2019 8:50 | 0.8583 | 2.775   | 7.976    | 7.4583  | 0.5913 | 29.72    | 0.2317 | -0.7418 |
| 4/22/2019 8:51 | 1.0417 | 3.8417  | 6.3063   | 7.1583  | 0.5913 | 27.9091  | 0.2    | -0.7418 |
| 4/22/2019 8:52 | 1.1417 | 3.45    | 7.382    | 7.1833  | 0.5913 | 26.1273  | 0.2044 | -0.7418 |
| 4/22/2019 8:53 | 1.2    | 2.6583  | 7.8632   | 7.0667  | 0.5913 | 24.575   | 0.1974 | -0.7418 |
| 4/22/2019 8:54 | 1.15   | 3       | 7.1552   | 6.7167  | 0.5913 | 22.8364  | 0.2042 | -0.7418 |
| 4/22/2019 8:55 | 1.2917 | 4.2     | 5.5133   | 6.25    | 0.5913 | 21.775   | 0.1652 | -0.7418 |
| 4/22/2019 8:56 | 1.4667 | 3.5583  | 6.1452   | 5.875   | 0.5913 | 21.13    | 0.163  | -0.7418 |
| 4/22/2019 8:57 | 1.525  | 3.1333  | 5.9418   | 5.575   | 0.5913 | 20.2909  | 0.1792 | -0.7418 |
| 4/22/2019 8:58 | 1.6417 | 4.3417  | 5.4882   | 5.7583  | 0.5913 | 19.5     | 0.1536 | -0.7418 |

|                |        |         |          |          |        |         |        |         |
|----------------|--------|---------|----------|----------|--------|---------|--------|---------|
| 4/22/2019 8:59 | 1.6167 | 3.925   | 5.638    | 5.1667   | 0.5913 | 18.4167 | 0.1584 | -0.7418 |
| 4/22/2019 9:00 | 1.625  | 2.9083  | 5.4533   | 5.3583   | 0.5913 | 17.44   | 0.1724 | -0.7418 |
| 4/22/2019 9:01 | 1.4667 | 3.1417  | 5.5795   | 5.2      | 0.5913 | 16.2818 | 0.1615 | -0.7418 |
| 4/22/2019 9:02 | 1.4    | 3.375   | 4.8103   | 5.2      | 0.5913 | 15.4636 | 0.1567 | -0.7418 |
| 4/22/2019 9:03 | 1.5583 | 4.25    | 4.8468   | 5.2333   | 0.5913 | 14.8    | 0.1464 | -0.7418 |
| 4/22/2019 9:04 | 1.7    | 3.425   | 4.5398   | 4.625    | 0.5913 | 14.6364 | 0.1338 | -0.7418 |
| 4/22/2019 9:05 | 1.7833 | 3.6     | 3.7567   | 4.275    | 0.5913 | 14.0583 | 0.1411 | -0.7418 |
| 4/22/2019 9:06 | 1.6167 | 2.9417  | 4.1832   | 3.625    | 0.5913 | 13.92   | 0.1558 | -0.7418 |
| 4/22/2019 9:07 | 1.4167 | 3.075   | 3.9582   | 3.2667   | 0.5913 | 13.5417 | 0.139  | -0.7418 |
| 4/22/2019 9:08 | 1.4    | 2.5583  | 3.8245   | 3        | 0.5913 | 13.0917 | 0.152  | -0.7418 |
| 4/22/2019 9:09 | 1.4    | 2.8583  | 3.5272   | 3.0333   | 0.5913 | 12.725  | 0.1428 | -0.7418 |
| 4/22/2019 9:10 | 1.3833 | 2.4083  | 3.2643   | 3.2917   | 0.5913 | 12.625  | 0.1383 | -0.7418 |
| 4/22/2019 9:11 | 1.3    | 2.7417  | 3.2428   | 2.8417   | 0.5913 | 12.6818 | 0.1403 | -0.7418 |
| 4/22/2019 9:12 | 1.2    | 2.675   | 3.1378   | 2.2      | 0.5913 | 12.7667 | 0.1489 | -0.7418 |
| 4/22/2019 9:13 | 1.0917 | 2.2583  | 3.1763   | 2.5917   | 0.5913 | 13.225  | 0.1399 | -0.7418 |
| 4/22/2019 9:14 | 1.0083 | 2.05    | 2.728    | 2.4333   | 0.5913 | 13.85   | 0.1487 | -0.7418 |
| 4/22/2019 9:15 | 1      | 2.2167  | 2.7787   | 2.1      | 0.5913 | 13.8167 | 0.1449 | -0.7418 |
| 4/22/2019 9:16 | 1      | 2.175   | 2.7315   | 2.5167   | 0.5913 | 13.7    | 0.1401 | -0.7418 |
| 4/22/2019 9:17 | 0.9833 | 1.375   | 2.9995   | 2.4417   | 0.5913 | 13.95   | 0.1528 | -0.7418 |
| 4/22/2019 9:18 | 0.8667 | 1.0417  | 2.979    | 1.8167   | 0.5913 | 14      | 0.1501 | -0.7418 |
| 4/22/2019 9:19 | 0.8    | 1.475   | 2.8432   | 2.1083   | 0.5913 | 14.2417 | 0.1455 | -0.7418 |
| 4/22/2019 9:20 | 0.8    | 1.4083  | 2.4808   | 1.2917   | 0.5913 | 14.3667 | 0.1603 | -0.7418 |
| 4/22/2019 9:21 | 0.8    | 1.4     | 2.9917   | 1.1333   | 0.5913 | 14.3091 | 0.1457 | -0.7418 |
| 4/22/2019 9:22 | 0.8    | 0.9583  | 2.8343   | 1.65     | 0.5913 | 14.2833 | 0.1548 | -0.7418 |
| 4/22/2019 9:23 | 0.8    | 0.5333  | 1.7407   | 1.6917   | 0.5913 | 14.7091 | 0.1564 | -0.7418 |
| 4/22/2019 9:24 | 0.7917 | 0.975   | 2.7555   | 1.4      | 0.5913 | 14.6583 | 0.152  | -0.7418 |
| 4/22/2019 9:25 | 0.7    | 1.3417  | 2.8527   | 1.5083   | 0.5913 | 14.4778 | 0.1589 | -0.7418 |
| 4/22/2019 9:26 | 0.7    | 0.4417  | 2.8767   | 1.5167   | 0.5913 | 13.4583 | 0.1569 | -0.7418 |
| 4/22/2019 9:27 | 0.6167 | 0.45    | 2.9238   | 1.0167   | 0.5913 | 12.68   | 0.144  | -0.7418 |
| 4/22/2019 9:28 | 0.625  | 0.925   | 2.8435   | 1.525    | 0.5913 | 12.525  | 0.166  | -0.7418 |
| 4/22/2019 9:29 | 0.6    | 1.9667  | 7.2312   | 4.9333   | 0.5913 | 13.1636 | 0.1831 | -0.7418 |
| 4/22/2019 9:30 | 0.6    | 4.0583  | 27.045   | 20.3417  | 0.5913 | 14.6636 | 0.3223 | -0.7418 |
| 4/22/2019 9:31 | 0.6    | 8.5333  | 61.0683  | 49.6417  | 0.5913 | 17.0333 | 0.4351 | -0.7418 |
| 4/22/2019 9:32 | 0.6    | 12.8917 | 128.065  | 100.7    | 0.5913 | 19.1667 | 0.6089 | -0.7418 |
| 4/22/2019 9:33 | 0.5833 | 11.3333 | 203.3833 | 165      | 0.5913 | 22.2546 | 0.9269 | -0.7418 |
| 4/22/2019 9:34 | 0.5    | 11.8667 | 178.5417 | 142.65   | 0.5913 | 25.6083 | 0.8893 | -0.7418 |
| 4/22/2019 9:35 | 0.5    | 15.5    | 223.8417 | 181.6167 | 0.5913 | 52.225  | 1.0532 | -0.7418 |
| 4/22/2019 9:36 | 0.5833 | 14.5583 | 243.65   | 199.3083 | 0.5913 | 69.1667 | 1.2067 | -0.7418 |
| 4/22/2019 9:37 | 0.6    | 16.45   | 271.375  | 221.025  | 0.5913 | 48.8917 | 1.3338 | -0.7418 |
| 4/22/2019 9:38 | 0.6    | 14.5    | 291.2917 | 235.3833 | 0.5913 | 55.2    | 1.458  | -0.7418 |
| 4/22/2019 9:39 | 0.6    | 14.2417 | 284.1333 | 229.2583 | 0.5913 | 67.3091 | 1.4612 | -0.7418 |
| 4/22/2019 9:40 | 0.6    | 15.0333 | 276.525  | 223.6667 | 0.5913 | 71.5833 | 1.4297 | -0.7418 |
| 4/22/2019 9:41 | 0.6    | 14.275  | 277.5417 | 224.3583 | 0.5913 | 72.3667 | 1.4565 | -0.7418 |
| 4/22/2019 9:42 | 0.6    | 13.3833 | 274.1917 | 222.1667 | 0.5913 | 72.275  | 1.481  | -0.7418 |
| 4/22/2019 9:43 | 0.6    | 13.8667 | 270.5333 | 219.9167 | 0.5913 | 73.46   | 1.46   | -0.7418 |
| 4/22/2019 9:44 | 0.6    | 13.0917 | 264.775  | 215.1333 | 0.5913 | 62.1    | 1.4768 | -0.7418 |
| 4/22/2019 9:45 | 0.6    | 11.9083 | 260.9083 | 212.6    | 0.5913 | 61.1333 | 1.4482 | -0.7418 |

|                 |        |         |          |          |        |         |        |         |
|-----------------|--------|---------|----------|----------|--------|---------|--------|---------|
| 4/22/2019 9:46  | 0.6    | 12.8417 | 257.7417 | 210.7    | 0.5913 | 64.6167 | 1.444  | -0.7418 |
| 4/22/2019 9:47  | 0.6    | 11.85   | 253.5333 | 206.8667 | 0.5913 | 66.4889 | 1.4407 | -0.7418 |
| 4/22/2019 9:48  | 0.6    | 12.1333 | 249.4833 | 205.4417 | 0.5913 | 68.1182 | 1.4143 | -0.7418 |
| 4/22/2019 9:49  | 0.6    | 12.9167 | 245.15   | 202.3583 | 0.5913 | 67.2273 | 1.422  | -0.7418 |
| 4/22/2019 9:50  | 0.6083 | 12.4417 | 241.1    | 200.325  | 0.5913 | 66.5818 | 1.4095 | -0.7418 |
| 4/22/2019 9:51  | 0.7    | 12.4167 | 236.7917 | 197.4167 | 0.5913 | 65.8364 | 1.393  | -0.7418 |
| 4/22/2019 9:52  | 0.7    | 13.0667 | 233.4083 | 193.9583 | 0.5913 | 65.4333 | 1.3903 | -0.7418 |
| 4/22/2019 9:53  | 0.7    | 12.4583 | 230.6917 | 193.1167 | 0.5913 | 65.2333 | 1.3715 | -0.7418 |
| 4/22/2019 9:54  | 0.6167 | 12.9583 | 227.8083 | 190.9667 | 0.5913 | 65.2818 | 1.3693 | -0.7418 |
| 4/22/2019 9:55  | 0.6167 | 11.9333 | 224.4583 | 189.1083 | 0.5913 | 64.975  | 1.3608 | -0.7418 |
| 4/22/2019 9:56  | 0.7    | 13.1083 | 223.65   | 188.4167 | 0.5913 | 65.2727 | 1.3478 | -0.7418 |
| 4/22/2019 9:57  | 0.7    | 12.4583 | 219.8917 | 185.6583 | 0.5913 | 66.3167 | 1.3432 | -0.7418 |
| 4/22/2019 9:58  | 0.7    | 12.025  | 215.975  | 183.45   | 0.5913 | 65.8636 | 1.335  | -0.7418 |
| 4/22/2019 9:59  | 0.7083 | 12.1417 | 214.7417 | 182.0167 | 0.5913 | 65.38   | 1.3275 | -0.7418 |
| 4/22/2019 10:00 | 0.7833 | 11.7333 | 212.775  | 180.6417 | 0.5913 | 65.5455 | 1.3232 | -0.7418 |
| 4/22/2019 10:01 | 0.7917 | 12.65   | 209.3333 | 177.7417 | 0.5913 | 65.4583 | 1.3013 | -0.7418 |
| 4/22/2019 10:02 | 0.725  | 12.3417 | 207.4833 | 176.4    | 0.5913 | 65.4417 | 1.2987 | -0.7418 |
| 4/22/2019 10:03 | 0.7    | 11.9167 | 205.1333 | 175.1667 | 0.5913 | 66.0583 | 1.3048 | -0.7418 |
| 4/22/2019 10:04 | 0.6583 | 11.925  | 203.2    | 174.0333 | 0.5913 | 65.4273 | 1.2778 | -0.7418 |
| 4/22/2019 10:05 | 0.6    | 11.8667 | 199.4083 | 171.7667 | 0.5913 | 65.6833 | 1.2872 | -0.7418 |
| 4/22/2019 10:06 | 0.6    | 12.2667 | 198.35   | 170.6    | 0.5913 | 66.35   | 1.2757 | -0.7418 |
| 4/22/2019 10:07 | 0.6    | 12.6417 | 196.15   | 168.5917 | 0.5913 | 65.3917 | 1.2728 | -0.7418 |
| 4/22/2019 10:08 | 0.6    | 12.5333 | 193.6083 | 167.6667 | 0.5913 | 65.35   | 1.2722 | -0.7418 |
| 4/22/2019 10:09 | 0.6    | 12.3917 | 192.75   | 166.6167 | 0.5913 | 63.8273 | 1.252  | -0.7418 |
| 4/22/2019 10:10 | 0.625  | 11.9583 | 189.8667 | 164.5    | 0.5913 | 62.8083 | 1.2575 | -0.7418 |
| 4/22/2019 10:11 | 0.6    | 12.025  | 188.4917 | 163.9417 | 0.5913 | 62.0182 | 1.2483 | -0.7418 |
| 4/22/2019 10:12 | 0.6    | 11.7833 | 187.2167 | 162.8083 | 0.5913 | 59.85   | 1.235  | -0.7418 |
| 4/22/2019 10:13 | 0.6    | 11.575  | 182.725  | 160.375  | 0.5913 | 58.53   | 1.2432 | -0.7418 |
| 4/22/2019 10:14 | 0.6    | 12.45   | 183.3583 | 159.3417 | 0.5913 | 57.9333 | 1.2285 | -0.7418 |
| 4/22/2019 10:15 | 0.5417 | 11.75   | 182.275  | 158.575  | 0.5913 | 57.2636 | 1.2348 | -0.7418 |
| 4/22/2019 10:16 | 0.5    | 11.9583 | 180.4917 | 157.5    | 0.5913 | 57.025  | 1.2312 | -0.7418 |
| 4/22/2019 10:17 | 0.475  | 12.2667 | 177.9833 | 155.2083 | 0.5913 | 56.675  | 1.2072 | -0.7418 |
| 4/22/2019 10:18 | 0.425  | 11.9833 | 175.9083 | 154.5833 | 0.5913 | 54.975  | 1.2145 | -0.7418 |
| 4/22/2019 10:19 | 0.4    | 11.4833 | 174.85   | 152.7    | 0.5913 | 53.8333 | 1.2093 | -0.7418 |
| 4/22/2019 10:20 | 0.4    | 11.6    | 174.45   | 152.9333 | 0.5913 | 52.8    | 1.2138 | -0.7418 |
| 4/22/2019 10:21 | 0.475  | 10.9167 | 172.15   | 150.4917 | 0.5913 | 51.5091 | 1.2092 | -0.7418 |
| 4/22/2019 10:22 | 0.5    | 10.9167 | 169.7333 | 148.775  | 0.5913 | 50.9545 | 1.1857 | -0.7418 |
| 4/22/2019 10:23 | 0.5    | 11.5917 | 169.85   | 149.2667 | 0.5913 | 51.3091 | 1.2042 | -0.7418 |
| 4/22/2019 10:24 | 0.475  | 10.7083 | 167.9083 | 147.6583 | 0.5913 | 51.5    | 1.189  | -0.7418 |
| 4/22/2019 10:25 | 0.4583 | 11.1333 | 166.35   | 145.9333 | 0.5913 | 52.1545 | 1.1778 | -0.7418 |
| 4/22/2019 10:26 | 0.45   | 11.575  | 164.725  | 144.475  | 0.5913 | 52.3364 | 1.181  | -0.7418 |
| 4/22/2019 10:27 | 0.5    | 11.7167 | 164.6583 | 144.1333 | 0.5913 | 52.78   | 1.1757 | -0.7418 |
| 4/22/2019 10:28 | 0.5    | 11.7083 | 162.4333 | 142.9083 | 0.5913 | 53.2636 | 1.1643 | -0.7418 |
| 4/22/2019 10:29 | 0.575  | 11.875  | 160.3583 | 141.225  | 0.5913 | 53.3667 | 1.1623 | -0.7418 |
| 4/22/2019 10:30 | 0.6    | 11.2583 | 160.125  | 141.325  | 0.5913 | 53.2182 | 1.1498 | -0.7418 |
| 4/22/2019 10:31 | 0.5917 | 11.5    | 158.6667 | 140.0417 | 0.5913 | 52.5546 | 1.156  | -0.7418 |
| 4/22/2019 10:32 | 0.5417 | 10.9167 | 156.7917 | 138.8    | 0.5913 | 52.175  | 1.1563 | -0.7418 |

|                 |        |         |          |          |        |         |        |         |
|-----------------|--------|---------|----------|----------|--------|---------|--------|---------|
| 4/22/2019 10:33 | 0.6    | 11.0167 | 155.4333 | 137.55   | 0.5913 | 51.6636 | 1.1455 | -0.7418 |
| 4/22/2019 10:34 | 0.6083 | 10.9167 | 153.9833 | 136.6667 | 0.5913 | 50.7455 | 1.147  | -0.7418 |
| 4/22/2019 10:35 | 0.625  | 10.85   | 154.0583 | 135.9833 | 0.5913 | 50.4909 | 1.146  | -0.7418 |
| 4/22/2019 10:36 | 0.6    | 10.7    | 152.1    | 134.475  | 0.5913 | 50.7    | 1.1378 | -0.7418 |
| 4/22/2019 10:37 | 0.6    | 11.2333 | 151.5083 | 134.2417 | 0.5913 | 50.4818 | 1.1455 | -0.7418 |
| 4/22/2019 10:38 | 0.6    | 11.0333 | 149.0583 | 132.2083 | 0.5913 | 49.7667 | 1.1203 | -0.7418 |
| 4/22/2019 10:39 | 0.6    | 11.025  | 148.7417 | 131.5917 | 0.5913 | 49.0364 | 1.1218 | -0.7418 |
| 4/22/2019 10:40 | 0.5    | 10.8333 | 147.0667 | 130.625  | 0.5913 | 47.8083 | 1.124  | -0.7418 |
| 4/22/2019 10:41 | 0.5583 | 10.4583 | 146.1667 | 130.35   | 0.5913 | 46.71   | 1.1158 | -0.7418 |
| 4/22/2019 10:42 | 0.6    | 10.15   | 144.925  | 128.575  | 0.5913 | 46.0364 | 1.1183 | -0.7418 |
| 4/22/2019 10:43 | 0.6    | 10.125  | 143.95   | 128.125  | 0.5913 | 46.4    | 1.1038 | -0.7418 |
| 4/22/2019 10:44 | 0.6    | 10.3583 | 143.3167 | 127.575  | 0.5913 | 48.14   | 1.0968 | -0.7418 |
| 4/22/2019 10:45 | 0.5333 | 10.075  | 141.85   | 126.9833 | 0.5913 | 48.6    | 1.1045 | -0.7418 |
| 4/22/2019 10:46 | 0.5667 | 10.0917 | 141.2917 | 125.9917 | 0.5913 | 49.1833 | 1.0827 | -0.7418 |
| 4/22/2019 10:47 | 0.6    | 10.1667 | 140.275  | 125.2083 | 0.5913 | 49.5667 | 1.1035 | -0.7418 |
| 4/22/2019 10:48 | 0.6    | 10.3167 | 139.3    | 124.1333 | 0.5913 | 49.7182 | 1.0993 | -0.7418 |
| 4/22/2019 10:49 | 0.6    | 9.6     | 138.7667 | 123.6    | 0.5913 | 50.46   | 1.0923 | -0.7418 |
| 4/22/2019 10:50 | 0.6    | 10.2833 | 137.0417 | 122.2417 | 0.5913 | 51.9091 | 1.083  | -0.7418 |
| 4/22/2019 10:51 | 0.6    | 10.0667 | 135.4333 | 121.0333 | 0.5913 | 53.4455 | 1.063  | -0.7418 |
| 4/22/2019 10:52 | 0.5333 | 9.1667  | 129.1833 | 113.3667 | 0.5913 | 54.5667 | 1.029  | -0.7418 |
| 4/22/2019 10:53 | 0.5    | 8.1083  | 126.9    | 114.4    | 0.5913 | 55.6    | 1.0023 | -0.7418 |
| 4/22/2019 10:54 | 0.4833 | 7.8167  | 118.075  | 106.6583 | 0.5913 | 56.0455 | 0.9785 | -0.7418 |
| 4/22/2019 10:55 | 0.4417 | 8.8     | 112.075  | 101.1167 | 0.5913 | 56.3364 | 0.929  | -0.7418 |
| 4/22/2019 10:56 | 0.5    | 7.175   | 100.1108 | 92.2333  | 0.5913 | 55.07   | 0.8629 | -0.7418 |
| 4/22/2019 10:57 | 0.5667 | 8.15    | 89.8492  | 82.5333  | 0.5913 | 53.7818 | 0.7745 | -0.7418 |
| 4/22/2019 10:58 | 0.6917 | 7       | 78.2525  | 72.7083  | 0.5913 | 53.275  | 0.7192 | -0.7418 |
| 4/22/2019 10:59 | 0.8083 | 7.15    | 75.1275  | 68.775   | 0.5913 | 52.175  | 0.6614 | -0.7418 |
| 4/22/2019 11:00 | 0.8917 | 6.1333  | 66.8908  | 62.5833  | 0.5913 | 51.36   | 0.6262 | -0.7418 |
| 4/22/2019 11:01 | 0.8917 | 6.55    | 58.1592  | 54.85    | 0.5913 | 49.7    | 0.5662 | -0.7418 |
| 4/22/2019 11:02 | 0.9    | 7.1917  | 53.3358  | 51.3583  | 0.5913 | 47.35   | 0.5182 | -0.7418 |
| 4/22/2019 11:03 | 1      | 6.4583  | 49.6692  | 47.7833  | 0.5913 | 44.7    | 0.5012 | -0.7418 |
| 4/22/2019 11:04 | 1.0583 | 6.5583  | 42.1     | 42.2333  | 0.5913 | 41.51   | 0.4413 | -0.7418 |
| 4/22/2019 11:05 | 1.2333 | 7.575   | 39.56    | 39.5417  | 0.5913 | 38.525  | 0.4076 | -0.7418 |
| 4/22/2019 11:06 | 1.3917 | 6.6     | 37.65    | 37.5583  | 0.5913 | 36.2455 | 0.4003 | -0.7418 |
| 4/22/2019 11:07 | 1.55   | 7.3333  | 33.6983  | 33.6833  | 0.5913 | 33.8583 | 0.3605 | -0.7418 |
| 4/22/2019 11:08 | 1.6167 | 7.5083  | 31.4583  | 31.55    | 0.5913 | 31.5667 | 0.3438 | -0.7418 |
| 4/22/2019 11:09 | 1.7583 | 8.125   | 29.0567  | 29.3083  | 0.5913 | 29.7364 | 0.3202 | -0.7418 |
| 4/22/2019 11:10 | 1.9    | 7.775   | 27.5233  | 27.5333  | 0.5913 | 28.0167 | 0.3009 | -0.7418 |
| 4/22/2019 11:11 | 2.05   | 7.5     | 25.0833  | 25.6833  | 0.5913 | 25.9636 | 0.2879 | -0.7418 |
| 4/22/2019 11:12 | 2.2    | 7.8667  | 24.045   | 24.4833  | 0.5913 | 23.4    | 0.2631 | -0.7418 |
| 4/22/2019 11:13 | 2.3167 | 8.7083  | 22.78    | 24.0333  | 0.5913 | 20.96   | 0.2568 | -0.7418 |
| 4/22/2019 11:14 | 2.45   | 9.1167  | 21.2     | 22.4167  | 0.5913 | 19.12   | 0.2413 | -0.7418 |
| 4/22/2019 11:15 | 2.5917 | 9.275   | 20.5133  | 20.925   | 0.5913 | 17.18   | 0.2153 | -0.7418 |
| 4/22/2019 11:16 | 2.7167 | 9.8417  | 20.1767  | 20.7583  | 0.5913 | 15.6364 | 0.2231 | -0.7418 |
| 4/22/2019 11:17 | 2.8167 | 9.6917  | 18.8267  | 19.8917  | 0.5913 | 14.41   | 0.2111 | -0.7418 |
| 4/22/2019 11:18 | 2.9    | 10.0833 | 18.305   | 18.8417  | 0.5913 | 13.325  | 0.1948 | -0.7418 |
| 4/22/2019 11:19 | 3.0417 | 10.2    | 17.895   | 18.575   | 0.5913 | 12.3083 | 0.2049 | -0.7418 |

|                 |        |         |         |         |        |         |        |         |
|-----------------|--------|---------|---------|---------|--------|---------|--------|---------|
| 4/22/2019 11:20 | 3.1583 | 10.85   | 16.9883 | 17.7583 | 0.5913 | 11.9909 | 0.1725 | -0.7418 |
| 4/22/2019 11:21 | 3.3333 | 11.1583 | 16.1733 | 17.3667 | 0.5913 | 11.7    | 0.1706 | -0.7418 |
| 4/22/2019 11:22 | 3.5167 | 10.875  | 15.62   | 16.7167 | 0.5913 | 11.1636 | 0.1809 | -0.7418 |
| 4/22/2019 11:23 | 3.6    | 10.625  | 15.2233 | 15.925  | 0.5913 | 11.0364 | 0.1587 | -0.7418 |
| 4/22/2019 11:24 | 3.7    | 10.8333 | 14.9033 | 15.9667 | 0.5913 | 10.99   | 0.1621 | -0.7418 |
| 4/22/2019 11:25 | 3.775  | 11.05   | 15.1233 | 15.8    | 0.5913 | 11.2091 | 0.152  | -0.7418 |
| 4/22/2019 11:26 | 3.8583 | 11.425  | 14.6467 | 14.775  | 0.5913 | 11.6727 | 0.1504 | -0.7418 |
| 4/22/2019 11:27 | 3.8667 | 11.7333 | 14.1233 | 15.2583 | 0.5913 | 11.8    | 0.1504 | -0.7418 |
| 4/22/2019 11:28 | 3.9667 | 11.9083 | 14.38   | 14.8917 | 0.5913 | 11.8333 | 0.1379 | -0.7418 |
| 4/22/2019 11:29 | 4.0583 | 11.2083 | 14.1533 | 14.7917 | 0.5913 | 12.3727 | 0.1364 | -0.7418 |
| 4/22/2019 11:30 | 4.2    | 11.6667 | 14.3933 | 15.0583 | 0.5913 | 12.8818 | 0.1447 | -0.7418 |
| 4/22/2019 11:31 | 4.2917 | 12      | 14.4683 | 14.8333 | 0.5913 | 13.3091 | 0.1208 | -0.7418 |
| 4/22/2019 11:32 | 4.4833 | 12.5333 | 14.2883 | 14.6833 | 0.5913 | 12.81   | 0.126  | -0.7418 |
| 4/22/2019 11:33 | 4.5818 | 12.95   | 14.165  | 14.625  | 0.5913 | 12.5636 | 0.1238 | -0.7418 |
| 4/22/2019 11:34 | 4.725  | 13.1    | 14.5583 | 14.15   | 0.5913 | 12.4818 | 0.1148 | -0.7418 |
| 4/22/2019 11:35 | 4.8583 | 12.425  | 14.585  | 14.7917 | 0.5913 | 12.8083 | 0.1222 | -0.7418 |
| 4/22/2019 11:36 | 5.0333 | 13.125  | 14.16   | 14.675  | 0.5913 | 13.2091 | 0.1177 | -0.7418 |
| 4/22/2019 11:37 | 5.1833 | 13.15   | 14.1383 | 14.6083 | 0.5913 | 12.9818 | 0.1068 | -0.7418 |
| 4/22/2019 11:38 | 5.3917 | 13.5833 | 14.175  | 14.7    | 0.5913 | 12.9583 | 0.1187 | -0.7418 |
| 4/22/2019 11:39 | 5.4    | 13.2167 | 14.31   | 14.6917 | 0.5913 | 13.17   | 0.1048 | -0.7418 |
| 4/22/2019 11:40 | 5.3833 | 12.9167 | 13.8317 | 14.1083 | 0.5913 | 13.4727 | 0.1108 | -0.7418 |
| 4/22/2019 11:41 | 5.425  | 13.8333 | 14.51   | 14.8167 | 0.5913 | 13.0909 | 0.1167 | -0.7418 |
| 4/22/2019 11:42 | 5.6417 | 13.775  | 14.605  | 14.65   | 0.5913 | 12.62   | 0.0989 | -0.7418 |
| 4/22/2019 11:43 | 5.9083 | 14.1583 | 14.4583 | 14.5417 | 0.5913 | 12.0455 | 0.1124 | -0.7418 |
| 4/22/2019 11:44 | 6.1    | 14.425  | 14.43   | 14.7583 | 0.5913 | 11.8818 | 0.1039 | -0.7418 |
| 4/22/2019 11:45 | 6.1583 | 14.8167 | 14.2883 | 14.625  | 0.5913 | 11.9083 | 0.0997 | -0.7418 |
| 4/22/2019 11:46 | 6.1667 | 15.05   | 14.3767 | 14.7583 | 0.5913 | 11.9417 | 0.111  | -0.7418 |
| 4/22/2019 11:47 | 6.175  | 14.3917 | 14.5917 | 15.4667 | 0.5913 | 11.9    | 0.1033 | -0.7418 |
| 4/22/2019 11:48 | 6.25   | 13.9333 | 14.1233 | 14.4333 | 0.5913 | 11.8    | 0.0978 | -0.7418 |
| 4/22/2019 11:49 | 6.3417 | 14.8083 | 14.5783 | 15.275  | 0.5913 | 11.5364 | 0.1099 | -0.7418 |
| 4/22/2019 11:50 | 6.4    | 14.325  | 14.33   | 14.65   | 0.5913 | 11.55   | 0.0956 | -0.7418 |
| 4/22/2019 11:51 | 6.4    | 14.9417 | 14.2167 | 14.625  | 0.5913 | 11.4417 | 0.1074 | -0.7418 |
| 4/22/2019 11:52 | 6.3667 | 14.1167 | 13.7583 | 13.4917 | 0.5913 | 11.3    | 0.101  | -0.7418 |
| 4/22/2019 11:53 | 6.2917 | 12.8667 | 13.6633 | 13.975  | 0.5913 | 11.7667 | 0.0959 | -0.7418 |
| 4/22/2019 11:54 | 6.2167 | 13.8667 | 13.75   | 13.5167 | 0.5913 | 12.2583 | 0.1065 | -0.7418 |
| 4/22/2019 11:55 | 6.2417 | 13.5667 | 13.795  | 13.6    | 0.5913 | 12.6083 | 0.1024 | -0.7418 |
| 4/22/2019 11:56 | 6.2333 | 13.05   | 13.2267 | 12.9167 | 0.5913 | 12.9727 | 0.1011 | -0.7418 |
| 4/22/2019 11:57 | 6.1083 | 12.8    | 13.1167 | 13.8083 | 0.5913 | 13.5    | 0.1075 | -0.7418 |
| 4/22/2019 11:58 | 5.925  | 12.1167 | 12.7533 | 12.1833 | 0.5913 | 13.8273 | 0.0961 | -0.7418 |
| 4/22/2019 11:59 | 5.725  | 10.8917 | 12.39   | 12.2083 | 0.5913 | 13.7    | 0.1069 | -0.7418 |
| 4/22/2019 12:00 | 5.5667 | 11.4833 | 12.3567 | 12.0333 | 0.5913 | 13.45   | 0.1135 | -0.7418 |
| 4/22/2019 12:01 | 5.4417 | 10.7417 | 12.3683 | 11.5667 | 0.5913 | 13.3333 | 0.1061 | -0.7418 |
| 4/22/2019 12:02 | 5.3167 | 9.875   | 11.8783 | 10.9917 | 0.5913 | 13.2091 | 0.1153 | -0.7418 |
| 4/22/2019 12:03 | 5.1545 | 10.075  | 11.695  | 10.5917 | 0.5913 | 13.3333 | 0.104  | -0.7418 |
| 4/22/2019 12:04 | 5.025  | 10.2833 | 11.3667 | 10.7583 | 0.5913 | 13.13   | 0.1156 | -0.7418 |
| 4/22/2019 12:05 | 4.9083 | 9.475   | 11.25   | 9.9667  | 0.5913 | 12.7    | 0.1207 | -0.7418 |
| 4/22/2019 12:06 | 4.8083 | 9.2917  | 10.98   | 9.8833  | 0.5913 | 12.0083 | 0.1041 | -0.7418 |



|                 |        |         |          |          |        |          |        |         |
|-----------------|--------|---------|----------|----------|--------|----------|--------|---------|
| 4/22/2019 12:07 | 4.7083 | 8.7417  | 10.8583  | 9.5      | 0.5913 | 11.075   | 0.1196 | -0.7418 |
| 4/22/2019 12:08 | 4.6    | 9.2083  | 11.075   | 9.6583   | 0.5913 | 10.41    | 0.1149 | -0.7418 |
| 4/22/2019 12:09 | 4.5083 | 9.1167  | 10.6917  | 9.7083   | 0.5913 | 9.8182   | 0.1077 | -0.7418 |
| 4/22/2019 12:10 | 4.45   | 7.8667  | 10.5933  | 9.5      | 0.5913 | 9.07     | 0.1218 | -0.7418 |
| 4/22/2019 12:11 | 4.3667 | 8.0167  | 10.101   | 8.8583   | 0.5913 | 8.7273   | 0.1026 | -0.7418 |
| 4/22/2019 12:12 | 4.2333 | 8.1333  | 10.107   | 8.65     | 0.5913 | 8.4818   | 0.1121 | -0.7418 |
| 4/22/2019 12:13 | 4.15   | 7.8917  | 10.2267  | 8.75     | 0.5913 | 8.2727   | 0.1196 | -0.7418 |
| 4/22/2019 12:14 | 4.0417 | 7.675   | 9.9142   | 7.9917   | 0.5913 | 8.3455   | 0.1047 | -0.7418 |
| 4/22/2019 12:15 | 3.9833 | 7.35    | 9.5925   | 8.3583   | 0.5913 | 7.9818   | 0.1186 | -0.7418 |
| 4/22/2019 12:16 | 3.9    | 7.75    | 9.8723   | 8.2167   | 0.5913 | 8.2083   | 0.1159 | -0.7418 |
| 4/22/2019 12:17 | 3.8333 | 7.6     | 9.7013   | 7.5333   | 0.5913 | 8.7333   | 0.1115 | -0.7418 |
| 4/22/2019 12:18 | 3.7583 | 6.8417  | 9.2458   | 7.3      | 0.5913 | 9.4091   | 0.1243 | -0.7418 |
| 4/22/2019 12:19 | 3.7    | 7.0167  | 9.2777   | 7.25     | 0.5913 | 10.2     | 0.1125 | -0.7418 |
| 4/22/2019 12:20 | 3.625  | 6.8083  | 9.1318   | 6.4917   | 0.5913 | 11.2083  | 0.1183 | -0.7418 |
| 4/22/2019 12:21 | 3.5167 | 6.1333  | 9.2487   | 6.8833   | 0.5913 | 11.9083  | 0.1224 | -0.7418 |
| 4/22/2019 12:22 | 3.425  | 5.9667  | 9.0077   | 7.0333   | 0.5913 | 12.8818  | 0.1118 | -0.7418 |
| 4/22/2019 12:23 | 3.3417 | 5.5833  | 8.6797   | 6.8167   | 0.5913 | 13.8083  | 0.1249 | -0.7418 |
| 4/22/2019 12:24 | 3.2833 | 5.2583  | 8.574    | 6.4      | 0.5913 | 14.81    | 0.1201 | -0.7418 |
| 4/22/2019 12:25 | 3.1667 | 5.2667  | 8.3575   | 6.2      | 0.5913 | 15.7818  | 0.1216 | -0.7418 |
| 4/22/2019 12:26 | 3.025  | 5.1417  | 8.341    | 6.5583   | 0.5913 | 16.8     | 0.131  | -0.7418 |
| 4/22/2019 12:27 | 2.9    | 5.1417  | 8.2457   | 6.025    | 0.5913 | 17.5667  | 0.1166 | -0.7418 |
| 4/22/2019 12:28 | 2.825  | 5.2833  | 8.0852   | 5.7667   | 0.5913 | 18.2083  | 0.1227 | -0.7418 |
| 4/22/2019 12:29 | 2.9    | 5.4833  | 8.4937   | 6.0083   | 0.5913 | 18.6     | 0.1173 | -0.7418 |
| 4/22/2019 12:30 | 2.9    | 4.2583  | 8.1733   | 5.7667   | 0.5913 | 19.0333  | 0.1163 | -0.7418 |
| 4/22/2019 12:31 | 2.8333 | 4.3667  | 8.0103   | 5.025    | 0.5913 | 19.2667  | 0.121  | -0.7418 |
| 4/22/2019 12:32 | 2.6917 | 8.2833  | 12.8243  | 11.1417  | 0.5913 | 19.5455  | 0.1215 | -0.7418 |
| 4/22/2019 12:33 | 2.2273 | 34.3583 | 199.045  | 168.15   | 0.5913 | 77.4     | 0.5465 | -0.7418 |
| 4/22/2019 12:34 | 1.65   | 32.5417 | 345.3083 | 295.825  | 0.5913 | 107.375  | 1.093  | -0.7418 |
| 4/22/2019 12:35 | 1.1    | 27.275  | 367.4833 | 303.6833 | 0.5913 | 99.2417  | 1.3199 | -0.7418 |
| 4/22/2019 12:36 | 0.8583 | 31.5333 | 387.6833 | 318.475  | 0.5913 | 83.6909  | 1.5088 | -0.7418 |
| 4/22/2019 12:37 | 0.75   | 26.6083 | 443.1333 | 348.1167 | 0.5913 | 99.075   | 1.7053 | -0.7418 |
| 4/22/2019 12:38 | 0.7    | 25.3167 | 457.7583 | 348.775  | 0.5913 | 118.5818 | 1.7766 | -0.7418 |
| 4/22/2019 12:39 | 0.7    | 24.6667 | 485.1667 | 359.9833 | 0.5913 | 106.8909 | 2.0373 | -0.7418 |
| 4/22/2019 12:40 | 0.6167 | 24.025  | 471.35   | 351.1    | 0.5913 | 134.2182 | 2.0513 | -0.7418 |
| 4/22/2019 12:41 | 0.6    | 23.575  | 477.675  | 352.5083 | 0.5913 | 143.5667 | 2.0853 | -0.7418 |
| 4/22/2019 12:42 | 0.6    | 22.7    | 497.275  | 363.6667 | 0.5913 | 125.3417 | 2.2494 | -0.7418 |
| 4/22/2019 12:43 | 0.6    | 21.8667 | 496.9167 | 361.8333 | 0.5913 | 104.11   | 2.4158 | -0.7418 |
| 4/22/2019 12:44 | 0.6083 | 21.6167 | 483.1583 | 353.1917 | 0.5913 | 113.4333 | 2.3681 | -0.7418 |
| 4/22/2019 12:45 | 0.6    | 22.4833 | 485.6167 | 354.5667 | 0.5913 | 131.74   | 2.3787 | -0.7418 |
| 4/22/2019 12:46 | 0.6    | 20.7917 | 489.9583 | 356.8667 | 0.5913 | 143.32   | 2.5237 | -0.7418 |
| 4/22/2019 12:47 | 0.6    | 21.65   | 492.225  | 358.6417 | 0.5913 | 132.4727 | 2.5638 | -0.7418 |
| 4/22/2019 12:48 | 0.5083 | 20.2667 | 497.1667 | 362.9083 | 0.5913 | 136.27   | 2.6393 | -0.7418 |
| 4/22/2019 12:49 | 0.5    | 20.0167 | 500.375  | 365.7083 | 0.5913 | 136.36   | 2.6619 | -0.7418 |
| 4/22/2019 12:50 | 0.5    | 20.6083 | 503.3667 | 370.0333 | 0.5913 | 140.5    | 2.7084 | -0.7418 |
| 4/22/2019 12:51 | 0.5333 | 19.375  | 514.8083 | 377.325  | 0.5913 | 139.2909 | 2.8245 | -0.7418 |
| 4/22/2019 12:52 | 0.525  | 18.6333 | 507.925  | 371.7417 | 0.5913 | 139.5273 | 2.8631 | -0.7418 |
| 4/22/2019 12:53 | 0.55   | 19.0167 | 502.1    | 367.4583 | 0.5913 | 112.78   | 2.8235 | -0.7418 |

|                 |        |         |          |          |        |          |        |         |
|-----------------|--------|---------|----------|----------|--------|----------|--------|---------|
| 4/22/2019 12:54 | 0.5417 | 16.95   | 502.9833 | 306.7833 | 0.5913 | 137.8583 | 2.8767 | -0.7418 |
| 4/22/2019 12:55 | 0.5    | 18.0417 | 510.275  | 371.875  | 0.5913 | 134.5273 | 2.9652 | -0.7418 |
| 4/22/2019 12:56 | 0.5    | 17.1417 | 508.575  | 371.3167 | 0.5913 | 131.1    | 3.0146 | -0.7418 |
| 4/22/2019 12:57 | 0.5167 | 16.45   | 497.825  | 365.7083 | 0.5913 | 122.88   | 2.9962 | -0.7418 |
| 4/22/2019 12:58 | 0.5417 | 16.6833 | 497.3583 | 366.2083 | 0.5913 | 130.4583 | 3.0046 | -0.7418 |
| 4/22/2019 12:59 | 0.575  | 15.45   | 497.1083 | 366.5667 | 0.5913 | 115.1    | 3.0317 | -0.7418 |
| 4/22/2019 13:00 | 0.6    | 15.9417 | 493.3583 | 364.4083 | 0.5913 | 115.2083 | 3.0845 | -0.7418 |
| 4/22/2019 13:01 | 0.6    | 15.5583 | 485.8583 | 360.8167 | 0.5913 | 120.7818 | 3.0678 | -0.7418 |
| 4/22/2019 13:02 | 0.6    | 17.3583 | 479.9833 | 297.7083 | 0.5913 | 133.1667 | 3.0662 | -0.7418 |
| 4/22/2019 13:03 | 0.6    | 16.6583 | 477.3667 | 356.4583 | 0.5913 | 142.1818 | 3.0999 | -0.7418 |
| 4/22/2019 13:04 | 0.6    | 16.2583 | 472.8417 | 355.2417 | 0.5913 | 140.5909 | 3.1919 | -0.7418 |
| 4/22/2019 13:05 | 0.6    | 15.8    | 467.0333 | 321.1833 | 0.5913 | 137.6333 | 3.1787 | -0.7418 |
| 4/22/2019 13:06 | 0.6    | 15.75   | 461.7083 | 321.075  | 0.5913 | 137.3182 | 3.1422 | -0.7418 |
| 4/22/2019 13:07 | 0.6    | 15.9667 | 458.0833 | 173.1917 | 0.5913 | 136.7909 | 3.1623 | -0.7418 |
| 4/22/2019 13:08 | 0.6    | 15.3833 | 456.45   | 172.325  | 0.5913 | 136.1    | 3.1867 | -0.7418 |
| 4/22/2019 13:09 | 0.6    | 15.8083 | 448.025  | 349.3917 | 0.5913 | 135.6091 | 3.1863 | -0.7418 |
| 4/22/2019 13:10 | 0.675  | 15.175  | 443.5167 |          | 0.5913 | 134.5455 | 3.178  | -0.7418 |
| 4/22/2019 13:11 | 0.6917 | 13.7    | 438.8417 |          | 0.5913 | 133.3417 | 3.1408 | -0.7418 |
| 4/22/2019 13:12 | 0.625  | 14.125  | 435.0583 | 280.7182 | 0.5913 | 133.0364 | 3.1797 | -0.7418 |
| 4/22/2019 13:13 | 0.5917 | 14.3167 | 429.1083 | 170.6667 | 0.5913 | 132.5    | 3.1763 | -0.7418 |
| 4/22/2019 13:14 | 0.5417 | 14.425  | 427.6917 | 185      | 0.5913 | 131.88   | 3.1792 | -0.7418 |
| 4/22/2019 13:15 | 0.6    | 15.075  | 422.1    | 200.25   | 0.5913 | 131.29   | 3.1957 | -0.7418 |
| 4/22/2019 13:16 | 0.6    | 15.7333 | 421.1917 | 282.2857 | 0.5913 | 130.2091 | 3.1885 | -0.7418 |
| 4/22/2019 13:17 | 0.6    | 15.3833 | 418.925  | 322.0833 | 0.5913 | 129.3727 | 3.2485 | -0.7418 |
| 4/22/2019 13:18 | 0.6667 | 14.9333 | 414.1083 | 213.1111 | 0.5913 | 128.7636 | 3.2465 | -0.7418 |
| 4/22/2019 13:19 | 0.7    | 14      | 406.9667 | 157.475  | 0.5913 | 128.2273 | 3.2113 | -0.7418 |
| 4/22/2019 13:20 | 0.7    | 14.0083 | 404.2083 | 161.45   | 0.5913 | 128.5909 | 3.2258 | -0.7418 |
| 4/22/2019 13:21 | 0.6917 | 13.7583 | 400.0917 | 196.8583 | 0.5913 | 127.6182 | 3.2065 | -0.7418 |
| 4/22/2019 13:22 | 0.7    | 14.175  | 399.025  | 217.9583 | 0.5913 | 98.525   | 3.1955 | -0.7418 |
| 4/22/2019 13:23 | 0.6917 | 14.475  | 392.0583 | 305.1167 | 0.5913 | 86.4182  | 3.2157 | -0.7418 |
| 4/22/2019 13:24 | 0.7    | 14.7583 | 389.6917 | 304.3667 | 0.5913 | 76.4167  | 3.2375 | -0.7418 |
| 4/22/2019 13:25 | 0.7    | 14.25   | 386.2667 | 278.3    | 0.5913 | 61.7     | 3.2502 | -0.7418 |
| 4/22/2019 13:26 | 0.7    | 14.1083 | 383.0833 | 300.1167 | 0.5913 | 62.9909  | 3.1703 | -0.7418 |
| 4/22/2019 13:27 | 0.7    | 13.35   | 380.825  | 298.65   | 0.5913 | 76.5636  | 3.211  | -0.7418 |
| 4/22/2019 13:28 | 0.7    | 14.2    | 376.0167 | 295.4833 | 0.5913 | 68.2833  | 3.2407 | -0.7418 |
| 4/22/2019 13:29 | 0.7    | 13.4417 | 370.2333 | 294.1667 | 0.5913 | 69.8546  | 3.2287 | -0.7418 |
| 4/22/2019 13:30 | 0.7    | 13.4833 | 368.95   | 290.8    | 0.5913 | 71.7917  | 3.2342 | -0.7418 |
| 4/22/2019 13:31 | 0.7417 | 13.1583 | 364.825  | 289.1333 | 0.5913 | 50.3727  | 3.1902 | -0.7418 |
| 4/22/2019 13:32 | 0.775  | 12.7083 | 362.1417 | 287.3833 | 0.5913 | 67.54    | 3.2    | -0.7418 |
| 4/22/2019 13:33 | 0.725  | 13.125  | 360.1167 | 285.8    | 0.5913 | 57.8417  | 3.196  | -0.7418 |
| 4/22/2019 13:34 | 0.7083 | 12.5083 | 355.7417 | 282.8    | 0.5913 | 53.6182  | 3.1708 | -0.7418 |
| 4/22/2019 13:35 | 0.6583 | 13.9917 | 350.9417 | 279.6167 | 0.5913 | 71.075   | 3.2355 | -0.7418 |
| 4/22/2019 13:36 | 0.6    | 13.4583 | 350.05   | 278.5    | 0.5913 | 72.0909  | 3.1555 | -0.7418 |
| 4/22/2019 13:37 | 0.6    | 13.2    | 345.7833 | 277.0667 | 0.5913 | 69.5833  | 3.192  | -0.7418 |
| 4/22/2019 13:38 | 0.65   | 13.5333 | 344      | 274.95   | 0.5913 | 52.1182  | 3.1505 | -0.7418 |
| 4/22/2019 13:39 | 0.7    | 12.9833 | 339.1667 | 270.3833 | 0.5913 | 77.6727  | 3.1383 | -0.7418 |
| 4/22/2019 13:40 | 0.7    | 13.3167 | 339.6167 | 271.55   | 0.5913 | 95.68    | 3.109  | -0.7418 |

|                 |        |         |          |          |        |          |        |         |
|-----------------|--------|---------|----------|----------|--------|----------|--------|---------|
| 4/22/2019 13:41 | 0.7    | 12.1833 | 334.35   | 267.1167 | 0.5913 | 100.1417 | 3.0963 | -0.7418 |
| 4/22/2019 13:42 | 0.6167 | 12.1917 | 331.0083 | 265.4    | 0.5913 | 103.0727 | 3.0572 | -0.7418 |
| 4/22/2019 13:43 | 0.6    | 12.575  | 329.9833 | 264.5667 | 0.5913 | 88.3833  | 3.124  | -0.7418 |
| 4/22/2019 13:44 | 0.6    | 12.3417 | 326.425  | 262.2    | 0.5913 | 95.8091  | 3.1005 | -0.7418 |
| 4/22/2019 13:45 | 0.6    | 12.7583 | 323.9583 | 259.9833 | 0.5913 | 98.7091  | 3.0972 | -0.7418 |
| 4/22/2019 13:46 | 0.6083 | 12.05   | 321.825  | 258.7833 | 0.5913 | 86.2455  | 3.0432 | -0.7418 |
| 4/22/2019 13:47 | 0.7    | 11.475  | 321.125  | 258.2167 | 0.5913 | 78.5727  | 3.0658 | -0.7418 |
| 4/22/2019 13:48 | 0.7    | 12.2    | 317.6917 | 255.6    | 0.5913 | 71.3     | 3.0602 | -0.7418 |
| 4/22/2019 13:49 | 0.7    | 12.45   | 314.225  | 252.95   | 0.5913 | 72.5667  | 3.0452 | -0.7418 |
| 4/22/2019 13:50 | 0.7    | 11.9583 | 312.4583 | 251.5833 | 0.5913 | 73.0333  | 2.9735 | -0.7418 |
| 4/22/2019 13:51 | 0.7    | 11.9167 | 309.925  | 249.9333 | 0.5913 | 80.7546  | 2.9912 | -0.7418 |
| 4/22/2019 13:52 | 0.7    | 11.475  | 308.0083 | 248.8833 | 0.5913 | 86.8546  | 2.9265 | -0.7418 |
| 4/22/2019 13:53 | 0.7    | 11.8417 | 307.5417 | 248.0333 | 0.5913 | 74.02    | 2.9765 | -0.7418 |
| 4/22/2019 13:54 | 0.775  | 10.0833 | 303.325  | 242.3167 | 0.5913 | 77.1091  | 2.8952 | -0.7418 |
| 4/22/2019 13:55 | 0.7833 | 9.2     | 262.2417 | 212.55   | 0.5913 | 67.0583  | 2.5375 | -0.7418 |
| 4/22/2019 13:56 | 0.8    | 10.2917 | 256.1333 | 210.85   | 0.5913 | 34.8167  | 2.4203 | -0.7418 |
| 4/22/2019 13:57 | 0.7667 | 7.05    | 227.5667 | 182.0667 | 0.5913 | 55.9     | 2.2273 | -0.7418 |
| 4/22/2019 13:58 | 0.775  | 7.2167  | 190.3417 | 157.2333 | 0.5913 | 62.8333  | 1.9085 | -0.7418 |
| 4/22/2019 13:59 | 0.85   | 8.4167  | 150.6167 | 124.6833 | 0.5913 | 72.0364  | 1.6192 | -0.7418 |
| 4/22/2019 14:00 | 0.9417 | 6.9333  | 142.6167 | 121.15   | 0.5913 | 67.8     | 1.5198 | -0.7418 |
| 4/22/2019 14:01 | 1      | 6.1     | 149.8083 | 124.8    | 0.5913 | 66.9727  | 1.5732 | -0.7418 |
| 4/22/2019 14:02 | 1      | 6.6583  | 125.45   | 104.8333 | 0.5913 | 57.8     | 1.3473 | -0.7418 |
| 4/22/2019 14:03 | 1.0417 | 5.925   | 108.805  | 90.8667  | 0.5913 | 54.0417  | 1.2102 | -0.7418 |
| 4/22/2019 14:04 | 1.1083 | 7.35    | 96.1833  | 85.0667  | 0.5913 | 45.9636  | 1.0842 | -0.7418 |
| 4/22/2019 14:05 | 1.2167 | 5.9417  | 80.5667  | 72.4333  | 0.5913 | 43.6417  | 0.997  | -0.7418 |
| 4/22/2019 14:06 | 1.4167 | 8.5833  | 71.0117  | 63.7833  | 0.5913 | 43.7455  | 0.8569 | -0.7418 |
| 4/22/2019 14:07 | 1.5833 | 7.9583  | 68.4167  | 60.4833  | 0.5913 | 41.5546  | 0.8218 | -0.7418 |
| 4/22/2019 14:08 | 1.7417 | 7.7667  | 63.6667  | 55.7333  | 0.5913 | 40.6167  | 0.74   | -0.7418 |
| 4/22/2019 14:09 | 1.85   | 8.9417  | 53.3533  | 48.2333  | 0.5913 | 39.3364  | 0.6889 | -0.7418 |
| 4/22/2019 14:10 | 2.025  | 9.4667  | 51.7717  | 46.4667  | 0.5913 | 38.6     | 0.613  | -0.7418 |
| 4/22/2019 14:11 | 2.1583 | 8.325   | 50.325   | 46.1333  | 0.5913 | 37.3083  | 0.6246 | -0.7418 |
| 4/22/2019 14:12 | 2.1333 | 8.0167  | 49.4283  | 43.55    | 0.5913 | 36.4083  | 0.6197 | -0.7418 |
| 4/22/2019 14:13 | 2.1    | 9.325   | 44.51    | 39.4333  | 0.5913 | 35.5917  | 0.5554 | -0.7418 |
| 4/22/2019 14:14 | 2.3455 | 11.7417 | 33.0617  | 32.6333  | 0.5913 | 34.6273  | 0.4554 | -0.7418 |
| 4/22/2019 14:15 | 2.7167 | 11.3583 | 33.635   | 32.05    | 0.5913 | 33.1727  | 0.4243 | -0.7418 |
| 4/22/2019 14:16 | 3.0583 | 12.4833 | 29.07    | 29.2667  | 0.5913 | 30.2636  | 0.3862 | -0.7418 |
| 4/22/2019 14:17 | 3.325  | 14.3    | 28.3117  | 28.2667  | 0.5913 | 27.5167  | 0.3694 | -0.7418 |
| 4/22/2019 14:18 | 3.4833 | 13.125  | 27.4283  | 27.1     | 0.5913 | 25.125   | 0.3411 | -0.7418 |
| 4/22/2019 14:19 | 3.6    | 12.5917 | 27.435   | 26.85    | 0.5913 | 23.2455  | 0.3397 | -0.7418 |
| 4/22/2019 14:20 | 3.5    | 12.15   | 25.8033  | 24.9     | 0.5913 | 21.4727  | 0.3478 | -0.7418 |
| 4/22/2019 14:21 | 3.425  | 12.7417 | 25.7617  | 24.3333  | 0.5913 | 20.6727  | 0.3129 | -0.7418 |
| 4/22/2019 14:22 | 3.4667 | 13.9667 | 24.8083  | 22.9833  | 0.5913 | 20.025   | 0.3292 | -0.7418 |
| 4/22/2019 14:23 | 3.675  | 13.2083 | 23.4717  | 22.9     | 0.5913 | 19.6     | 0.2773 | -0.7418 |
| 4/22/2019 14:24 | 3.7583 | 12.1333 | 24.01    | 21.7333  | 0.5913 | 19.0727  | 0.2945 | -0.7418 |
| 4/22/2019 14:25 | 3.775  | 13.0083 | 19.775   | 20.9167  | 0.5913 | 18.22    | 0.2758 | -0.7418 |
| 4/22/2019 14:26 | 3.8    | 13.525  | 22.5833  | 20.9833  | 0.5913 | 17.61    | 0.252  | -0.7418 |
| 4/22/2019 14:27 | 3.8417 | 12.35   | 21.595   | 20.5667  | 0.5913 | 17.2667  | 0.2608 | -0.7418 |

|                 |        |         |         |         |        |         |        |         |
|-----------------|--------|---------|---------|---------|--------|---------|--------|---------|
| 4/22/2019 14:28 | 3.9583 | 13.65   | 20.4883 | 20.1    | 0.5913 | 18      | 0.2418 | -0.7418 |
| 4/22/2019 14:29 | 4.1167 | 15.05   | 19.645  | 19.7333 | 0.5913 | 18.2818 | 0.2165 | -0.7418 |
| 4/22/2019 14:30 | 4.3667 | 15      | 19.825  | 19.65   | 0.5913 | 18.2727 | 0.2267 | -0.7418 |
| 4/22/2019 14:31 | 4.475  | 14.9    | 18.9217 | 18.5833 | 0.5913 | 18.3333 | 0.2    | -0.7418 |
| 4/22/2019 14:32 | 4.4917 | 14.3667 | 18.8517 | 18.3    | 0.5913 | 18.6545 | 0.1985 | -0.7418 |
| 4/22/2019 14:33 | 4.45   | 14.8833 | 18.7817 | 18.4667 | 0.5913 | 19.0167 | 0.2032 | -0.7418 |
| 4/22/2019 14:34 | 4.5667 | 14.1083 | 18.605  | 17.4833 | 0.5913 | 18.76   | 0.1801 | -0.7418 |
| 4/22/2019 14:35 | 4.7167 | 15.5167 | 17.9033 | 18.1833 | 0.5913 | 18.2273 | 0.1799 | -0.7418 |
| 4/22/2019 14:36 | 4.8667 | 14.25   | 17.8183 | 17.3833 | 0.5913 | 17.8727 | 0.1755 | -0.7418 |
| 4/22/2019 14:37 | 4.875  | 14.5917 | 17.2867 | 16.7167 | 0.5913 | 17.425  | 0.1664 | -0.7418 |
| 4/22/2019 14:38 | 4.7917 | 14.3333 | 16.9867 | 16      | 0.5913 | 16.95   | 0.1767 | -0.7418 |
| 4/22/2019 14:39 | 4.7583 | 14.5917 | 16.0933 | 16.8167 | 0.5913 | 16.675  | 0.156  | -0.7418 |
| 4/22/2019 14:40 | 4.85   | 15.075  | 16.56   | 17      | 0.5913 | 16.4667 | 0.155  | -0.7418 |
| 4/22/2019 14:41 | 4.9417 | 15.1    | 15.8433 | 16.25   | 0.5913 | 17.0091 | 0.1515 | -0.7418 |
| 4/22/2019 14:42 | 5.0167 | 15.0667 | 16.21   | 16.6667 | 0.5913 | 17.8636 | 0.1419 | -0.7418 |
| 4/22/2019 14:43 | 5.1    | 15.7917 | 16.54   | 16.65   | 0.5913 | 18.0909 | 0.144  | -0.7418 |
| 4/22/2019 14:44 | 5.0083 | 14.8667 | 16.1067 | 15.9167 | 0.5913 | 17.8667 | 0.1444 | -0.7418 |
| 4/22/2019 14:45 | 5.0917 | 15.475  | 16.535  | 16.4667 | 0.5913 | 17.6667 | 0.1307 | -0.7418 |
| 4/22/2019 14:46 | 5.0417 | 14.675  | 16.2983 | 15.2    | 0.5913 | 17.0909 | 0.1446 | -0.7418 |
| 4/22/2019 14:47 | 5.175  | 15.2667 | 16.3117 | 16.1167 | 0.5913 | 16.4917 | 0.1334 | -0.7418 |
| 4/22/2019 14:48 | 5.2667 | 15.25   | 15.7    | 15.9167 | 0.5913 | 16.0364 | 0.1392 | -0.7418 |
| 4/22/2019 14:49 | 5.5167 | 17.1083 | 16.6183 | 16.5333 | 0.5913 | 16      | 0.1356 | -0.7418 |
| 4/22/2019 14:50 | 5.7083 | 16.5833 | 17.1217 | 16.7333 | 0.5913 | 16.15   | 0.1159 | -0.7418 |
| 4/22/2019 14:51 | 5.7917 | 15.6    | 16.41   | 15.8    | 0.5913 | 16.1455 | 0.1369 | -0.7418 |
| 4/22/2019 14:52 | 5.65   | 15.05   | 15.8333 | 15.1333 | 0.5913 | 16.1    | 0.1307 | -0.7418 |
| 4/22/2019 14:53 | 5.525  | 15.1583 | 15.8283 | 14.7667 | 0.5913 | 16.0636 | 0.1237 | -0.7418 |
| 4/22/2019 14:54 | 5.4    | 15.2083 | 15.7983 | 14.9    | 0.5913 | 15.4455 | 0.1292 | -0.7418 |
| 4/22/2019 14:55 | 5.425  | 16.0417 | 16.2617 | 15.9    | 0.5913 | 14.2818 | 0.1076 | -0.7418 |
| 4/22/2019 14:56 | 5.6    | 17.1583 | 16.6567 | 16.95   | 0.5913 | 13.81   | 0.1182 | -0.7418 |
| 4/22/2019 14:57 | 5.975  | 17.9167 | 17.4967 | 17.7    | 0.5913 | 13.825  | 0.1233 | -0.7418 |
| 4/22/2019 14:58 | 6.1833 | 17.225  | 17.09   | 17.1833 | 0.5913 | 14.1583 | 0.1129 | -0.7418 |
| 4/22/2019 14:59 | 6.1917 | 15.5667 | 16.725  | 15.9333 | 0.5913 | 14.7917 | 0.1242 | -0.7418 |
| 4/22/2019 15:00 | 6.0083 | 16.8333 | 16.7317 | 16.3333 | 0.5913 | 15.0583 | 0.119  | -0.7418 |
| 4/22/2019 15:01 | 6.0333 | 17.1667 | 17.2133 | 16.6    | 0.5913 | 14.95   | 0.1135 | -0.7418 |
| 4/22/2019 15:02 | 6.2    | 17.2333 | 17.0417 | 16.7333 | 0.5913 | 14.4273 | 0.1265 | -0.7418 |
| 4/22/2019 15:03 | 6.4083 | 17.5167 | 17.8    | 17.4333 | 0.5913 | 14.0636 | 0.1165 | -0.7418 |
| 4/22/2019 15:04 | 6.525  | 17.55   | 17.6917 | 16.75   | 0.5913 | 13.4182 | 0.1155 | -0.7418 |
| 4/22/2019 15:05 | 6.475  | 16.9833 | 17.0367 | 17.2833 | 0.5913 | 12.475  | 0.1313 | -0.7418 |
| 4/22/2019 15:06 | 6.675  | 18.1833 | 18.2783 | 18.0833 | 0.5913 | 11.5909 | 0.1529 | -0.7418 |
| 4/22/2019 15:07 | 6.7917 | 17.6833 | 18.28   | 18.3    | 0.5913 | 11.6833 | 0.1398 | -0.7418 |
| 4/22/2019 15:08 | 7.0167 | 18.0417 | 18.2883 | 17.9    | 0.5913 | 11.4    | 0.1309 | -0.7418 |
| 4/22/2019 15:09 | 7.125  | 20      | 18.77   | 19.7167 | 0.5913 | 11.0083 | 0.1106 | -0.7418 |
| 4/22/2019 15:10 | 7.1917 | 18.3333 | 18.64   | 17.5333 | 0.5913 | 10.4333 | 0.123  | -0.7418 |
| 4/22/2019 15:11 | 7.1917 | 17.9083 | 18.4233 | 17.5833 | 0.5913 | 9.9917  | 0.1156 | -0.7418 |
| 4/22/2019 15:12 | 7.2    | 19.1917 | 18.7283 | 18.4833 | 0.5913 | 10.0818 | 0.1136 | -0.7418 |
| 4/22/2019 15:13 | 7.3083 | 19.0917 | 19.155  | 18.4833 | 0.5913 | 10.2667 | 0.1249 | -0.7418 |
| 4/22/2019 15:14 | 7.475  | 20.425  | 18.6583 | 18.2667 | 0.5913 | 10.6909 | 0.1069 | -0.7418 |

|                 |        |         |         |         |        |         |        |         |
|-----------------|--------|---------|---------|---------|--------|---------|--------|---------|
| 4/22/2019 15:15 | 7.6583 | 19.9833 | 19.3317 | 18.4    | 0.5913 | 10.775  | 0.1049 | -0.7418 |
| 4/22/2019 15:16 | 7.7    | 18.8417 | 18.7383 | 18.4333 | 0.5913 | 11.1455 | 0.111  | -0.7418 |
| 4/22/2019 15:17 | 7.7    | 19.2833 | 19.0117 | 18.4333 | 0.5913 | 11.5667 | 0.0991 | -0.7418 |
| 4/22/2019 15:18 | 7.7417 | 20.1667 | 19.43   | 19.2833 | 0.5913 | 12.5091 | 0.1117 | -0.7418 |
| 4/22/2019 15:19 | 7.8    | 18.9583 | 18.7517 | 18.7167 | 0.5913 | 13.4818 | 0.1016 | -0.7418 |
| 4/22/2019 15:20 | 7.925  | 20.1583 | 19.75   | 19.3333 | 0.5913 | 14.2455 | 0.1001 | -0.7418 |
| 4/22/2019 15:21 | 8.0083 | 20.5083 | 19.8833 | 19.75   | 0.5913 | 14.8583 | 0.108  | -0.7418 |
| 4/22/2019 15:22 | 8.125  | 19.85   | 19.8933 | 18.8167 | 0.5913 | 15.2546 | 0.0989 | -0.7418 |
| 4/22/2019 15:23 | 8.2417 | 19.95   | 19.5833 | 19.8333 | 0.5913 | 15.7091 | 0.1056 | -0.7418 |
| 4/22/2019 15:24 | 8.3667 | 20.5833 | 20.1283 | 20.6    | 0.5913 | 15.7273 | 0.1026 | -0.7418 |
| 4/22/2019 15:25 | 8.3667 | 20.1    | 20.2767 | 19.3    | 0.5913 | 15.66   | 0.0912 | -0.7418 |
| 4/22/2019 15:26 | 8.275  | 19.6167 | 19.5183 | 18.6    | 0.5913 | 15.32   | 0.1042 | -0.7418 |
| 4/22/2019 15:27 | 8.25   | 19.5167 | 19.9433 | 19.0167 | 0.5913 | 15.2    | 0.0969 | -0.7418 |
| 4/22/2019 15:28 | 8.2333 | 20.675  | 20.2    | 19.7167 | 0.5913 | 14.9273 | 0.0987 | -0.7418 |
| 4/22/2019 15:29 | 8.325  | 19.7583 | 20.0783 | 19.7667 | 0.5913 | 15.0417 | 0.1075 | -0.7418 |
| 4/22/2019 15:30 | 8.3167 | 20.35   | 20.145  | 19.7833 | 0.5913 | 15.01   | 0.0955 | -0.7418 |
| 4/22/2019 15:31 | 8.5583 | 22.3333 | 21.6683 | 21.8333 | 0.5913 | 14.9546 | 0.0989 | -0.7418 |
| 4/22/2019 15:32 | 8.8583 | 21.6167 | 21.2333 | 21.0833 | 0.5913 | 14.8182 | 0.0941 | -0.7418 |
| 4/22/2019 15:33 | 9.025  | 20.4    | 21.2958 | 20.1667 | 0.5913 | 14.7583 | 0.0893 | -0.7418 |
| 4/22/2019 15:34 | 8.8833 | 20.4333 | 20.7392 | 19.6667 | 0.5913 | 14.5273 | 0.106  | -0.7418 |
| 4/22/2019 15:35 | 8.7667 | 20.15   | 21.0375 | 19.7667 | 0.5913 | 14.1    | 0.0916 | -0.7418 |
| 4/22/2019 15:36 | 8.725  | 21.2    | 20.9142 | 20.3667 | 0.5913 | 13.5273 | 0.0947 | -0.7418 |
| 4/22/2019 15:37 | 8.925  | 21.9667 | 22.0258 | 20.5333 | 0.5913 | 12.7667 | 0.0979 | -0.7418 |
| 4/22/2019 15:38 | 9.0667 | 21.3083 | 21.71   | 20.2667 | 0.5913 | 12.2455 | 0.0889 | -0.7418 |
| 4/22/2019 15:39 | 8.975  | 20.0083 | 19.97   | 18.5833 | 0.5913 | 11.675  | 0.1003 | -0.7418 |
| 4/22/2019 15:40 | 8.75   | 19.8667 | 20.0292 | 18.9667 | 0.5913 | 11.7091 | 0.0966 | -0.7418 |
| 4/22/2019 15:41 | 8.4583 | 19.0417 | 19.8675 | 18.1667 | 0.5913 | 11.6    | 0.0933 | -0.7418 |
| 4/22/2019 15:42 | 8.3833 | 17.975  | 18.9325 | 17.7833 | 0.5913 | 11.6    | 0.1028 | -0.7418 |
| 4/22/2019 15:43 | 8.2667 | 17.9    | 18.7975 | 17.3833 | 0.5913 | 11.6    | 0.0885 | -0.7418 |
| 4/22/2019 15:44 | 8.1417 | 17.0167 | 19.0642 | 17.1833 | 0.5913 | 11.6636 | 0.1044 | -0.7418 |
| 4/22/2019 15:45 | 8.0083 | 16.9417 | 18.3133 | 16.0667 | 0.5913 | 11.4909 | 0.0887 | -0.7418 |
| 4/22/2019 15:46 | 7.775  | 15.5583 | 17.8258 | 15.6833 | 0.5913 | 11.2167 | 0.1044 | -0.7418 |
| 4/22/2019 15:47 | 7.4917 | 15.8667 | 17.3608 | 15.9333 | 0.5913 | 11.5364 | 0.1085 | -0.7418 |
| 4/22/2019 15:48 | 7.3    | 15.825  | 17.3883 | 16      | 0.5913 | 11.875  | 0.0984 | -0.7418 |
| 4/22/2019 15:49 | 7.1333 | 15.1583 | 17.3267 | 14.8667 | 0.5913 | 12.75   | 0.1042 | -0.7418 |
| 4/22/2019 15:50 | 6.9833 | 14.7583 | 16.8408 | 14.8667 | 0.5913 | 13.7636 | 0.0998 | -0.7418 |
| 4/22/2019 15:51 | 6.725  | 14.275  | 16.74   | 14.3667 | 0.5913 | 14.0636 | 0.1019 | -0.7418 |
| 4/22/2019 15:52 | 6.4833 | 14.15   | 16.285  | 12.8833 | 0.5913 | 13.8455 | 0.1057 | -0.7418 |
| 4/22/2019 15:53 | 6.3    | 13.1417 | 15.8175 | 13.1    | 0.5913 | 13.2667 | 0.091  | -0.7418 |
| 4/22/2019 15:54 | 6.15   | 12.8667 | 15.605  | 12.6167 | 0.5913 | 13      | 0.1103 | -0.7418 |
| 4/22/2019 15:55 | 6.0417 | 11.8833 | 15.6408 | 12.3333 | 0.5913 | 12.725  | 0.1058 | -0.7418 |
| 4/22/2019 15:56 | 5.9417 | 12.1083 | 15.2183 | 12.4833 | 0.5913 | 12.4167 | 0.0996 | -0.7418 |
| 4/22/2019 15:57 | 5.8083 | 11.275  | 14.8083 | 11.4833 | 0.5913 | 12.3167 | 0.1111 | -0.7418 |
| 4/22/2019 15:58 | 5.7083 | 11.0417 | 14.69   | 11.15   | 0.5913 | 12.25   | 0.0999 | -0.7418 |
| 4/22/2019 15:59 | 5.5417 | 11.1833 | 14.1767 | 11.2    | 0.5913 | 12.2091 | 0.1028 | -0.7418 |
| 4/22/2019 16:00 | 5.3667 | 10.6    | 14.1208 | 10.1667 | 0.5913 | 11.6    | 0.1043 | -0.7418 |
| 4/22/2019 16:01 | 5.2083 | 11.2083 | 13.8992 | 10.25   | 0.5913 | 10.5273 | 0.0953 | -0.7418 |

|                 |        |        |         |        |        |         |        |         |
|-----------------|--------|--------|---------|--------|--------|---------|--------|---------|
| 4/22/2019 16:02 | 5.0583 | 9.8917 | 13.8667 | 10.05  | 0.5913 | 9.2917  | 0.1055 | -0.7418 |
| 4/22/2019 16:03 | 4.9083 | 9.4667 | 13.0767 | 9.7833 | 0.5913 | 8.6333  | 0.0995 | -0.7418 |
| 4/22/2019 16:04 | 4.6917 | 9.3667 | 13.2475 | 8.7    | 0.5913 | 8.1     | 0.1025 | -0.7418 |
| 4/22/2019 16:05 | 4.5417 | 9.9667 | 13.1967 | 9.7167 | 0.5913 | 8       | 0.1093 | -0.7418 |
| 4/22/2019 16:06 | 4.5    | 9.2417 | 12.7133 | 8.9    | 0.5913 | 8.0364  | 0.1021 | -0.7418 |
| 4/22/2019 16:07 | 4.5    | 8.8    | 12.725  | 9.0167 | 0.5913 | 8.3455  | 0.1073 | -0.7418 |
| 4/22/2019 16:08 | 4.4083 | 8.5167 | 12.5    | 8.2667 | 0.5913 | 8.4273  | 0.1086 | -0.7418 |
| 4/22/2019 16:09 | 4.3083 | 7.9417 | 12.1817 | 8.0833 | 0.5913 | 7.9273  | 0.0964 | -0.7418 |
| 4/22/2019 16:10 | 4.2    | 8.5167 | 11.8567 | 8      | 0.5913 | 7.55    | 0.1133 | -0.7418 |
| 4/22/2019 16:11 | 4.1    | 7.4833 | 11.8758 | 7.6833 | 0.5913 | 7.0182  | 0.1077 | -0.7418 |
| 4/22/2019 16:12 | 4      | 7.2417 | 11.6717 | 7.6667 | 0.5913 | 6.5636  | 0.1113 | -0.7418 |
| 4/22/2019 16:13 | 3.875  | 7.6333 | 11.3992 | 7.2667 | 0.5913 | 7.3818  | 0.1124 | -0.7418 |
| 4/22/2019 16:14 | 3.7417 | 7.3667 | 11.315  | 7.0833 | 0.5913 | 8.1818  | 0.1006 | -0.7418 |
| 4/22/2019 16:15 | 3.65   | 7.375  | 11.5892 | 7.2167 | 0.5913 | 8.825   | 0.1163 | -0.7418 |
| 4/22/2019 16:16 | 3.6    | 6.5    | 11.1067 | 6.8667 | 0.5913 | 9.64    | 0.0969 | -0.7418 |
| 4/22/2019 16:17 | 3.5917 | 6.1583 | 11.26   | 6.5667 | 0.5913 | 10.4    | 0.1084 | -0.7418 |
| 4/22/2019 16:18 | 3.5    | 5.775  | 10.9283 | 5.95   | 0.5913 | 10.2909 | 0.111  | -0.7418 |
| 4/22/2019 16:19 | 3.4    | 5.9083 | 10.8425 | 5.7333 | 0.5913 | 9.5182  | 0.1004 | -0.7418 |
| 4/22/2019 16:20 | 3.3    | 6.2833 | 10.4498 | 5.9833 | 0.5913 | 9       | 0.1077 | -0.7418 |
| 4/22/2019 16:21 | 3.2167 | 5.3417 | 10.7175 | 6.5    | 0.5913 | 8.6     | 0.1051 | -0.7418 |
| 4/22/2019 16:22 | 3.2    | 5.2417 | 10.5025 | 5.3833 | 0.5913 | 8.7273  | 0.1089 | -0.7418 |
| 4/22/2019 16:23 | 3.1083 | 5.7417 | 10.1671 | 5.4833 | 0.5913 | 8.8167  | 0.1123 | -0.7418 |
| 4/22/2019 16:24 | 3      | 5.5417 | 10.0769 | 5.7    | 0.5913 | 8.81    | 0.0987 | -0.7418 |
| 4/22/2019 16:25 | 2.8917 | 5.4833 | 10.1045 | 4.9    | 0.5913 | 8.3667  | 0.1022 | -0.7418 |
| 4/22/2019 16:26 | 2.8    | 5.0917 | 10.1474 | 4.9833 | 0.5913 | 7.92    | 0.1058 | -0.7418 |
| 4/22/2019 16:27 | 2.7083 | 4.9667 | 9.6425  | 4.6667 | 0.5913 | 7.6818  | 0.106  | -0.7418 |
| 4/22/2019 16:28 | 2.625  | 3.7667 | 9.6813  | 4.2333 | 0.5913 | 6.6636  | 0.1171 | -0.7418 |
| 4/22/2019 16:29 | 2.5583 | 4.8667 | 9.6206  | 4.25   | 0.5913 | 5.975   | 0.1006 | -0.7418 |
| 4/22/2019 16:30 | 2.475  | 4.35   | 9.3883  | 4.9    | 0.5913 | 5.4     | 0.1125 | -0.7418 |
| 4/22/2019 16:31 | 2.4    | 4.1667 | 9.5671  | 4.3333 | 0.5913 | 5.35    | 0.1105 | -0.7418 |
| 4/22/2019 16:32 | 2.4    | 4.425  | 9.6049  | 4.0667 | 0.5913 | 4.9     | 0.1028 | -0.7418 |
| 4/22/2019 16:33 | 2.3    | 3.525  | 9.3     | 4.25   | 0.5913 | 4.9364  | 0.1184 | -0.7418 |
| 4/22/2019 16:34 | 2.3    | 3.8    | 9.6397  | 3.4167 | 0.5913 | 4.7417  | 0.106  | -0.7418 |
| 4/22/2019 16:35 | 2.2083 | 4.1083 | 9.1606  | 3.8833 | 0.5913 | 4.5     | 0.117  | -0.7418 |
| 4/22/2019 16:36 | 2.1167 | 4      | 9.17    | 3.35   | 0.5913 | 4.3455  | 0.1077 | -0.7418 |
| 4/22/2019 16:37 | 2.05   | 3.6833 | 9.4213  | 3.3667 | 0.5913 | 4.3818  | 0.1001 | -0.7418 |
| 4/22/2019 16:38 | 2      | 3.525  | 9.2707  | 3.7167 | 0.5913 | 4.075   | 0.1183 | -0.7418 |
| 4/22/2019 16:39 | 1.9333 | 2.8    | 8.8784  | 3.2167 | 0.5913 | 3.6182  | 0.1054 | -0.7418 |
| 4/22/2019 16:40 | 1.9    | 3.075  | 8.8573  | 3.2167 | 0.5913 | 3.7909  | 0.1109 | -0.7418 |
| 4/22/2019 16:41 | 1.9    | 3.4167 | 8.9395  | 3.2833 | 0.5913 | 4.2636  | 0.112  | -0.7418 |
| 4/22/2019 16:42 | 1.9    | 3.2583 | 8.7572  | 3.7333 | 0.5913 | 4.5455  | 0.0995 | -0.7418 |
| 4/22/2019 16:43 | 1.9    | 3.1667 | 8.8527  | 2.8    | 0.5913 | 4.6455  | 0.1149 | -0.7418 |
| 4/22/2019 16:44 | 1.825  | 2.6583 | 8.9421  | 2.6167 | 0.5913 | 5.1636  | 0.1133 | -0.7418 |
| 4/22/2019 16:45 | 1.7333 | 2.9333 | 8.7033  | 2.7833 | 0.5913 | 5.7818  | 0.0999 | -0.7418 |
| 4/22/2019 16:46 | 1.6917 | 2.7917 | 8.4695  | 2.25   | 0.5913 | 6.1417  | 0.112  | -0.7418 |
| 4/22/2019 16:47 | 1.6    | 2.6083 | 8.6129  | 2.6667 | 0.5913 | 6.2909  | 0.1021 | -0.7418 |
| 4/22/2019 16:48 | 1.6    | 2.775  | 8.683   | 2.5667 | 0.5913 | 6.6182  | 0.1207 | -0.7418 |

|                 |        |        |        |        |        |         |        |         |
|-----------------|--------|--------|--------|--------|--------|---------|--------|---------|
| 4/22/2019 16:49 | 1.5583 | 2.7917 | 8.4346 | 2.5167 | 0.5913 | 6.9     | 0.1129 | -0.7418 |
| 4/22/2019 16:50 | 1.5    | 2.9833 | 8.6388 | 2.6    | 0.5913 | 7.5     | 0.1039 | -0.7418 |
| 4/22/2019 16:51 | 1.5    | 3.4833 | 8.6493 | 2.2333 | 0.5913 | 8.3     | 0.1115 | -0.7418 |
| 4/22/2019 16:52 | 1.4083 | 2.4583 | 8.3321 | 2.2667 | 0.5913 | 9.1818  | 0.0981 | -0.7418 |
| 4/22/2019 16:53 | 1.4    | 2.5083 | 8.4677 | 1.8333 | 0.5913 | 9.3091  | 0.1107 | -0.7418 |
| 4/22/2019 16:54 | 1.4    | 2.0083 | 8.5109 | 2.25   | 0.5913 | 9.1727  | 0.1077 | -0.7418 |
| 4/22/2019 16:55 | 1.3583 | 3.0833 | 8.3636 | 2.3    | 0.5913 | 9.1818  | 0.1084 | -0.7418 |
| 4/22/2019 16:56 | 1.3    | 2.4917 | 8.0318 | 2.2    | 0.5913 | 8.8364  | 0.1109 | -0.7418 |
| 4/22/2019 16:57 | 1.3    | 1.9667 | 8.2414 | 1.7667 | 0.5913 | 8.3     | 0.1009 | -0.7418 |
| 4/22/2019 16:58 | 1.3    | 2.7583 | 8.2878 | 1.1167 | 0.5913 | 7.9091  | 0.1164 | -0.7418 |
| 4/22/2019 16:59 | 1.3    | 2.5333 | 8.5616 | 2.1833 | 0.5913 | 7.725   | 0.1117 | -0.7418 |
| 4/22/2019 17:00 | 1.2583 | 2.5667 | 8.3974 | 1.7833 | 0.5913 | 7.7545  | 0.0995 | -0.7418 |
| 4/22/2019 17:01 | 1.2    | 1.55   | 8.2797 | 2.0667 | 0.5913 | 7.8273  | 0.1177 | -0.7418 |
| 4/22/2019 17:02 | 1.2333 | 1.1167 | 8.2208 | 1.9167 | 0.5913 | 7.3455  | 0.1036 | -0.7418 |
| 4/22/2019 17:03 | 1.2917 | 1.4833 | 8.2283 | 1.7833 | 0.5913 | 6.5833  | 0.1136 | -0.7418 |
| 4/22/2019 17:04 | 1.3    | 1.925  | 7.9757 | 1.85   | 0.5913 | 6.1     | 0.1072 | -0.7418 |
| 4/22/2019 17:05 | 1.3    | 1.8833 | 8.0268 | 1.9167 | 0.5913 | 5.6273  | 0.1056 | -0.7418 |
| 4/22/2019 17:06 | 1.2833 | 1.875  | 8.0123 | 1.9333 | 0.5913 | 5.4455  | 0.1175 | -0.7418 |
| 4/22/2019 17:07 | 1.2417 | 2.075  | 8.1508 | 1.6333 | 0.5913 | 5.54    | 0.096  | -0.7418 |
| 4/22/2019 17:08 | 1.2167 | 1.6167 | 8.0682 | 2.0333 | 0.5913 | 6.0833  | 0.1067 | -0.7418 |
| 4/22/2019 17:09 | 1.2417 | 2.075  | 8.0735 | 1.5167 | 0.5913 | 6.975   | 0.1034 | -0.7418 |
| 4/22/2019 17:10 | 1.2417 | 1.75   | 8.2203 | 1.6667 | 0.5913 | 7.5417  | 0.0969 | -0.7418 |
| 4/22/2019 17:11 | 1.3    | 1.5583 | 8.2618 | 1.7    | 0.5913 | 8.0455  | 0.1117 | -0.7418 |
| 4/22/2019 17:12 | 1.3333 | 1.1    | 8.1367 | 2      | 0.5913 | 8.1083  | 0.096  | -0.7418 |
| 4/22/2019 17:13 | 1.3583 | 1.7083 | 8.0478 | 1.2667 | 0.5913 | 8.3455  | 0.109  | -0.7418 |
| 4/22/2019 17:14 | 1.3833 | 1.5333 | 8.1927 | 1.3833 | 0.5913 | 9.2182  | 0.1041 | -0.7418 |
| 4/22/2019 17:15 | 1.3583 | 1.6667 | 8.1287 | 1.1167 | 0.5913 | 10.15   | 0.0977 | -0.7418 |
| 4/22/2019 17:16 | 1.3    | 1.5583 | 8.09   | 1.7    | 0.5913 | 10.7667 | 0.1103 | -0.7418 |
| 4/22/2019 17:17 | 1.2917 | 1.1167 | 7.9742 | 1.5833 | 0.5913 | 11.0333 | 0.099  | -0.7418 |
| 4/22/2019 17:18 | 1.2833 | 1.3    | 7.9185 | 1.1833 | 0.5913 | 11.8    | 0.1073 | -0.7418 |
| 4/22/2019 17:19 | 1.3    | 1.2583 | 7.8442 | 1.2667 | 0.5913 | 12.8167 | 0.1081 | -0.7418 |
| 4/22/2019 17:20 | 1.3    | 0.9917 | 7.9422 | 1.4333 | 0.5913 | 13.37   | 0.0975 | -0.7418 |
| 4/22/2019 17:21 | 1.3    | 2.275  | 7.7387 | 1.4333 | 0.5913 | 13.05   | 0.1112 | -0.7418 |
| 4/22/2019 17:22 | 1.2833 | 1.3917 | 7.5655 | 1.5833 | 0.5913 | 13.3818 | 0.0952 | -0.7418 |
| 4/22/2019 17:23 | 1.2    | 0.8667 | 7.8692 | 1.45   | 0.5913 | 13.7167 | 0.1073 | -0.7418 |
| 4/22/2019 17:24 | 1.1667 | 1.575  | 7.7197 | 1.2667 | 0.5913 | 13.9833 | 0.1097 | -0.7418 |
| 4/22/2019 17:25 | 1.1    | 0.95   | 7.6557 | 1.1333 | 0.5913 | 14.2583 | 0.095  | -0.7418 |
| 4/22/2019 17:26 | 1.1    | 1.5333 | 7.9037 | 1.2167 | 0.5913 | 14.0636 | 0.1173 | -0.7418 |
| 4/22/2019 17:27 | 1.0833 | 1.1083 | 7.8983 | 1.0833 | 0.5913 | 14.0455 | 0.0983 | -0.7418 |
| 4/22/2019 17:28 | 1.1    | 1.4667 | 7.7023 | 1.55   | 0.5913 | 13.6727 | 0.1103 | -0.7418 |
| 4/22/2019 17:29 | 1.025  | 1.05   | 7.8433 | 1.2667 | 0.5913 | 13.4909 | 0.0953 | -0.7418 |
| 4/22/2019 17:30 | 1      | 1.4917 | 7.5452 | 1.3    | 0.5913 | 13.5818 | 0.1054 | -0.7418 |
| 4/22/2019 17:31 | 1      | 1.0417 | 7.6183 | 1.1    | 0.5913 | 13.1455 | 0.1099 | -0.7418 |
| 4/22/2019 17:32 | 1      | 1.0083 | 7.6622 | 0.8667 | 0.5913 | 13.1667 | 0.0957 | -0.7418 |
| 4/22/2019 17:33 | 1      | 1.5917 | 7.6347 | 0.95   | 0.5913 | 13.45   | 0.1014 | -0.7418 |
| 4/22/2019 17:34 | 0.925  | 0.4917 | 7.577  | 0.7333 | 0.5913 | 14.05   | 0.112  | -0.7418 |
| 4/22/2019 17:35 | 0.8667 | 1.075  | 7.4095 | 1      | 0.5913 | 14.5167 | 0.1026 | -0.7418 |

|                 |        |        |        |         |        |         |        |         |
|-----------------|--------|--------|--------|---------|--------|---------|--------|---------|
| 4/22/2019 17:36 | 0.8    | 0.475  | 7.533  | 0.75    | 0.5913 | 14.8    | 0.1132 | -0.7418 |
| 4/22/2019 17:37 | 0.8    | 1.475  | 7.836  | 0.4     | 0.5913 | 14.6917 | 0.0968 | -0.7418 |
| 4/22/2019 17:38 | 0.8    | 1.175  | 7.7183 | 1.1667  | 0.5913 | 15.025  | 0.1076 | -0.7418 |
| 4/22/2019 17:39 | 0.9    | 1.4333 | 7.5113 | 1.2667  | 0.5913 | 14.7273 | 0.1038 | -0.7418 |
| 4/22/2019 17:40 | 0.9    | 1.0167 | 7.492  | 1.15    | 0.5913 | 14.8833 | 0.0975 | -0.7418 |
| 4/22/2019 17:41 | 0.9    | 1.2667 | 7.8418 | 0.8     | 0.5913 | 15.55   | 0.1098 | -0.7418 |
| 4/22/2019 17:42 | 0.9    | 0.7417 | 7.6967 | 1.2333  | 0.5913 | 16.3273 | 0.1004 | -0.7418 |
| 4/22/2019 17:43 | 0.8083 | 0.8667 | 7.7257 | 1.3167  | 0.5913 | 16.6333 | 0.1122 | -0.7418 |
| 4/22/2019 17:44 | 0.8    | 1.0833 | 7.3952 | 1.0833  | 0.5913 | 16.7727 | 0.1127 | -0.7418 |
| 4/22/2019 17:45 | 0.8    | 1.0917 | 7.5057 | 0.2333  | 0.5913 | 17.3091 | 0.1016 | -0.7418 |
| 4/22/2019 17:46 | 0.8    | 1.625  | 7.3965 | 0.7333  | 0.5913 | 16.8182 | 0.1182 | -0.7418 |
| 4/22/2019 17:47 | 0.8    | 0.4833 | 7.4873 | 0.6667  | 0.5913 | 16.6182 | 0.0954 | -0.7418 |
| 4/22/2019 17:48 | 0.8    | 0.5417 | 7.3512 | 1.2333  | 0.5913 | 16.3833 | 0.1021 | -0.7418 |
| 4/22/2019 17:49 | 0.8    | 0.9167 | 7.673  | 0.9     | 0.5913 | 16.7455 | 0.1074 | -0.7418 |
| 4/22/2019 17:50 | 0.8    | 1.1667 | 7.3113 | 0.7833  | 0.5913 | 16.5917 | 0.1008 | -0.7418 |
| 4/22/2019 17:51 | 0.8    | 0.7667 | 7.5158 | 0.3833  | 0.5913 | 16.7455 | 0.11   | -0.7418 |
| 4/22/2019 17:52 | 0.825  | 1.3083 | 7.3422 | 0.6333  | 0.5913 | 16.9    | 0.0988 | -0.7418 |
| 4/22/2019 17:53 | 0.8417 | 0.7917 | 7.4153 | 0.4333  | 0.5913 | 16.1455 | 0.1111 | -0.7418 |
| 4/22/2019 17:54 | 0.8182 | 1.1167 | 7.5262 | 0.8667  | 0.5913 | 15.2091 | 0.1035 | -0.7418 |
| 4/22/2019 17:55 | 0.8083 | 0.6333 | 7.2735 | 0.5333  | 0.5913 | 14.95   | 0.1053 | -0.7418 |
| 4/22/2019 17:56 | 0.8083 | 0.8833 | 7.5312 | 0.3667  | 0.5913 | 14.6667 | 0.1147 | -0.7418 |
| 4/22/2019 17:57 | 0.8333 | 1.4167 | 7.4135 | 0.7833  | 0.5913 | 13.85   | 0.1006 | -0.7418 |
| 4/22/2019 17:58 | 0.8    | 0.8583 | 7.5388 | 0.7667  | 0.5913 | 13.3167 | 0.099  | -0.7418 |
| 4/22/2019 17:59 | 0.8    | 0.875  | 7.2882 | 0.2833  | 0.5913 | 13.33   | 0.1081 | -0.7418 |
| 4/22/2019 18:00 | 0.8    | -0.1   | 7.2813 | 0.7833  | 0.5913 | 13.1833 | 0.0937 | -0.7418 |
| 4/22/2019 18:01 | 0.8    | 0.225  | 7.44   | 0.9167  | 0.5913 | 13.0909 | 0.1035 | -0.7418 |
| 4/22/2019 18:02 | 0.8    | 0.1833 | 7.6077 | 0.85    | 0.5913 | 12.95   | 0.0988 | -0.7418 |
| 4/22/2019 18:03 | 0.8    | 0.8833 | 7.1212 | 0.7333  | 0.5913 | 12.8546 | 0.108  | -0.7418 |
| 4/22/2019 18:04 | 0.7833 | 0.4    | 7.4107 | 0.2833  | 0.5913 | 12.8167 | 0.112  | -0.7418 |
| 4/22/2019 18:05 | 0.7583 | 0.85   | 7.4128 | 0.55    | 0.5913 | 13.3909 | 0.1003 | -0.7418 |
| 4/22/2019 18:06 | 0.75   | 0.95   | 7.4095 | 0.3167  | 0.5913 | 13.6636 | 0.1081 | -0.7418 |
| 4/22/2019 18:07 | 0.7667 | 0.8083 | 7.4275 | -0.2333 | 0.5913 | 13.0909 | 0.096  | -0.7418 |
| 4/22/2019 18:08 | 0.7833 | 0.4917 | 7.4847 | 0.8833  | 0.5913 | 12.4167 | 0.1069 | -0.7418 |
| 4/22/2019 18:09 | 0.8    | 1.0333 | 7.3818 | 0.3     | 0.5913 | 12.3636 | 0.1057 | -0.7418 |
| 4/22/2019 18:10 | 0.775  | 0.025  | 7.4667 | 0.5167  | 0.5913 | 12.2273 | 0.109  | -0.7418 |
| 4/22/2019 18:11 | 0.75   | 0.6333 | 7.2352 | 0.4833  | 0.5913 | 11.73   | 0.108  | -0.7418 |
| 4/22/2019 18:12 | 0.7    | 0.0333 | 7.3397 | 0.55    | 0.5913 | 10.775  | 0.0978 | -0.7418 |
| 4/22/2019 18:13 | 0.7    | 0.5333 | 7.2167 | 0.75    | 0.5913 | 9.95    | 0.1107 | -0.7418 |
| 4/22/2019 18:14 | 0.7    | 0.625  | 7.3492 | 0.3333  | 0.5913 | 9.3583  | 0.1039 | -0.7418 |
| 4/22/2019 18:15 | 0.7    | 0.8917 | 7.0703 | 0.35    | 0.5913 | 8.4909  | 0.1009 | -0.7418 |
| 4/22/2019 18:16 | 0.625  | 0.9667 | 7.3152 | 0.4333  | 0.5913 | 7.8333  | 0.1047 | -0.7418 |
| 4/22/2019 18:17 | 0.675  | 0.1667 | 7.6012 | 0.8333  | 0.5913 | 6.85    | 0.0947 | -0.7418 |
| 4/22/2019 18:18 | 0.675  | 0.725  | 7.3665 | 0.3     | 0.5913 | 6.0833  | 0.1061 | -0.7418 |
| 4/22/2019 18:19 | 0.7    | 0.4167 | 7.4565 | 0.6833  | 0.5913 | 5.8     | 0.1056 | -0.7418 |
| 4/22/2019 18:20 | 0.7    | 0.4    | 7.3398 | 0.6667  | 0.5913 | 5.8     | 0.0938 | -0.7418 |
| 4/22/2019 18:21 | 0.7    | 0.3417 | 7.2402 | 0.3     | 0.5913 | 5.4333  | 0.113  | -0.7418 |
| 4/22/2019 18:22 | 0.7    | 0.275  | 7.2905 | 0.4     | 0.5913 | 5.0727  | 0.0985 | -0.7418 |



|                 |        |         |        |         |        |         |        |         |
|-----------------|--------|---------|--------|---------|--------|---------|--------|---------|
| 4/22/2019 18:23 | 0.7    | 0.2917  | 7.3245 | 0.3333  | 0.5913 | 4.4     | 0.0994 | -0.7418 |
| 4/22/2019 18:24 | 0.725  | 0.7833  | 7.2608 | 0.2167  | 0.5913 | 4.3     | 0.1059 | -0.7418 |
| 4/22/2019 18:25 | 0.7583 | 0.425   | 7.1583 | 0.4167  | 0.5913 | 4.3     | 0.089  | -0.7418 |
| 4/22/2019 18:26 | 0.7    | 0.2333  | 7.147  | 0.0667  | 0.5913 | 4.3     | 0.1083 | -0.7418 |
| 4/22/2019 18:27 | 0.7    | 0.3333  | 7.1882 | 0.4667  | 0.5913 | 4.3636  | 0.0969 | -0.7418 |
| 4/22/2019 18:28 | 0.7    | 0.375   | 7.549  | 0.3833  | 0.5913 | 4.375   | 0.0998 | -0.7418 |
| 4/22/2019 18:29 | 0.8    | 0.25    | 7.2313 | 0.0167  | 0.5913 | 4.3909  | 0.1113 | -0.7418 |
| 4/22/2019 18:30 | 0.8    | 0.7417  | 7.2545 | 0.35    | 0.5913 | 4.3167  | 0.0946 | -0.7418 |
| 4/22/2019 18:31 | 0.775  | 0.9417  | 7.191  | 0.3833  | 0.5913 | 4.3636  | 0.1055 | -0.7418 |
| 4/22/2019 18:32 | 0.7    | 0.7417  | 7.5795 | 0.6     | 0.5913 | 4.4     | 0.0906 | -0.7418 |
| 4/22/2019 18:33 | 0.7    | 0.3167  | 7.2516 | 0.8667  | 0.5913 | 4.4     | 0.1078 | -0.7418 |
| 4/22/2019 18:34 | 0.7583 | 0.3417  | 7.113  | 0.3167  | 0.5913 | 4.4     | 0.1076 | -0.7418 |
| 4/22/2019 18:35 | 0.8    | 0.4     | 7.3101 | 0.3333  | 0.5913 | 4.4     | 0.0968 | -0.7418 |
| 4/22/2019 18:36 | 0.8    | 0.0083  | 7.0091 | 0.7167  | 0.5913 | 4.4     | 0.1038 | -0.7418 |
| 4/22/2019 18:37 | 0.8    | 0.1667  | 7.3293 | 0.25    | 0.5913 | 4.4     | 0.0926 | -0.7418 |
| 4/22/2019 18:38 | 0.8    | -0.2083 | 7.446  | 0.6     | 0.5913 | 4.4     | 0.1039 | -0.7418 |
| 4/22/2019 18:39 | 0.8    | 0.5833  | 7.3698 | 0.1     | 0.5913 | 4.4     | 0.1116 | -0.7418 |
| 4/22/2019 18:40 | 0.8    | 1.0917  | 7.3937 | 0.4333  | 0.5913 | 4.4364  | 0.0958 | -0.7418 |
| 4/22/2019 18:41 | 0.8    | 0.35    | 7.1717 | -0.0667 | 0.5913 | 4.4333  | 0.1102 | -0.7418 |
| 4/22/2019 18:42 | 0.8    | 0.1833  | 7.0606 | 0.8667  | 0.5913 | 4.475   | 0.0949 | -0.7418 |
| 4/22/2019 18:43 | 0.8    | 0.3417  | 7.1873 | 0.8     | 0.5913 | 4.6     | 0.1081 | -0.7418 |
| 4/22/2019 18:44 | 0.8    | 0.6     | 7.3323 | 0.3333  | 0.5913 | 4.6     | 0.1058 | -0.7418 |
| 4/22/2019 18:45 | 0.8    | 0.2917  | 7.255  | 1.1     | 0.5913 | 4.6     | 0.0965 | -0.7418 |
| 4/22/2019 18:46 | 0.8    | 0.2     | 7.2478 | 0.5833  | 0.5913 | 4.6     | 0.1062 | -0.7418 |
| 4/22/2019 18:47 | 0.8    | 0.3083  | 7.0046 | 0.2667  | 0.5913 | 4.6     | 0.0923 | -0.7418 |
| 4/22/2019 18:48 | 0.8    | 1.4083  | 7.1681 | 0.6333  | 0.5913 | 4.5364  | 0.1069 | -0.7418 |
| 4/22/2019 18:49 | 0.8    | 0.6833  | 7.3024 | 0.1333  | 0.5913 | 4.5     | 0.1005 | -0.7418 |
| 4/22/2019 18:50 | 0.8    | 0.575   | 7.3767 | 0.7167  | 0.5913 | 4.5     | 0.102  | -0.7418 |
| 4/22/2019 18:51 | 0.8    | 0.2417  | 6.9173 | 0.4667  | 0.5913 | 4.52    | 0.1051 | -0.7418 |
| 4/22/2019 18:52 | 0.8    | 0.8     | 7.13   | 0.0167  | 0.5913 | 4.5     | 0.0891 | -0.7418 |
| 4/22/2019 18:53 | 0.7    | -0.0583 | 7.0449 | 0.4     | 0.5913 | 4.5083  | 0.1094 | -0.7418 |
| 4/22/2019 18:54 | 0.7    | 0.3167  | 7.4313 | 0.15    | 0.5913 | 4.58    | 0.1046 | -0.7418 |
| 4/22/2019 18:55 | 0.65   | 0.0917  | 7.1138 | 0.3167  | 0.5913 | 4.3364  | 0.1059 | -0.7418 |
| 4/22/2019 18:56 | 0.6083 | 0.4917  | 7.0754 | 0.2     | 0.5913 | 4.5727  | 0.1134 | -0.7418 |
| 4/22/2019 18:57 | 0.6    | 0.7083  | 7.3273 | -0.0667 | 0.5913 | 5.0417  | 0.0986 | -0.7418 |
| 4/22/2019 18:58 | 0.6    | 0.3667  | 7.4277 | 0.15    | 0.5913 | 5.8583  | 0.1112 | -0.7418 |
| 4/22/2019 18:59 | 0.6    | 0.6083  | 7.4388 | 0.7167  | 0.5913 | 6.6917  | 0.1055 | -0.7418 |
| 4/22/2019 19:00 | 0.6    | 0.9     | 7.1596 | 0.9667  | 0.5913 | 7.5455  | 0.0988 | -0.7418 |
| 4/22/2019 19:01 | 0.6    | 0.625   | 7.1173 | 0.7167  | 0.5913 | 8.825   | 0.1121 | -0.7418 |
| 4/22/2019 19:02 | 0.6083 | 0.8167  | 7.3997 | 0.3167  | 0.5913 | 10.5818 | 0.0944 | -0.7418 |
| 4/22/2019 19:03 | 0.6    | 0.6667  | 7.4562 | 0.2167  | 0.5913 | 11.975  | 0.1141 | -0.7418 |
| 4/22/2019 19:04 | 0.6    | 0.7     | 6.9435 | 0.9167  | 0.5913 | 13.0091 | 0.1058 | -0.7418 |
| 4/22/2019 19:05 | 0.6    | 0.9833  | 7.3178 | 0.15    | 0.5913 | 14.5167 | 0.1028 | -0.7418 |
| 4/22/2019 19:06 | 0.6    | 0.9167  | 7.5054 | 1       | 0.5913 | 15.5    | 0.1049 | -0.7418 |
| 4/22/2019 19:07 | 0.6    | 0.8583  | 7.0331 | 0.45    | 0.5913 | 16.9    | 0.0924 | -0.7418 |
| 4/22/2019 19:08 | 0.6333 | 0.7333  | 7.4631 | 0.3667  | 0.5913 | 18.525  | 0.1061 | -0.7418 |
| 4/22/2019 19:09 | 0.6833 | 1.15    | 7.0196 | 0.3167  | 0.5913 | 19.8    | 0.108  | -0.7418 |

|                 |        |         |        |         |        |         |        |         |
|-----------------|--------|---------|--------|---------|--------|---------|--------|---------|
| 4/22/2019 19:10 | 0.7    | 0.725   | 7.3181 | 0.0167  | 0.5913 | 20.55   | 0.108  | -0.7418 |
| 4/22/2019 19:11 | 0.7    | 0.7167  | 7.2225 | 0.75    | 0.5913 | 20.8546 | 0.1158 | -0.7418 |
| 4/22/2019 19:12 | 0.75   | 1.2583  | 7.0725 | 0.1833  | 0.5913 | 21.3833 | 0.0973 | -0.7418 |
| 4/22/2019 19:13 | 0.8    | 0.0667  | 6.9755 | 0.1     | 0.5913 | 21.6667 | 0.1179 | -0.7418 |
| 4/22/2019 19:14 | 0.8    | 0.5833  | 7.2163 | -0.0167 | 0.5913 | 21.0333 | 0.1042 | -0.7418 |
| 4/22/2019 19:15 | 0.825  | 1.5917  | 6.9992 | 0.6833  | 0.5913 | 20.225  | 0.1141 | -0.7418 |
| 4/22/2019 19:16 | 0.8    | 0.3083  | 7.1253 | 0.6333  | 0.5913 | 20.34   | 0.1203 | -0.7418 |
| 4/22/2019 19:17 | 0.8    | -0.025  | 7.1136 | 0.1333  | 0.5913 | 20.2333 | 0.1053 | -0.7418 |
| 4/22/2019 19:18 | 0.8    | 0.5167  | 7.4762 | 0.65    | 0.5913 | 20.56   | 0.1091 | -0.7418 |
| 4/22/2019 19:19 | 0.8    | 0.4417  | 6.8387 | 0.0667  | 0.5913 | 21.175  | 0.1013 | -0.7418 |
| 4/22/2019 19:20 | 0.8    | 0.675   | 6.969  | 0.3833  | 0.5913 | 21.2    | 0.1141 | -0.7418 |
| 4/22/2019 19:21 | 0.8    | 0.225   | 7.0245 | 0.4333  | 0.5913 | 21.1091 | 0.1053 | -0.7418 |
| 4/22/2019 19:22 | 0.8    | 0.5417  | 6.975  | 0.2833  | 0.5913 | 21.05   | 0.1092 | -0.7418 |
| 4/22/2019 19:23 | 0.8    | 0.5167  | 6.9388 | -0.2167 | 0.5913 | 21.6364 | 0.1111 | -0.7418 |
| 4/22/2019 19:24 | 0.8    | 0.4583  | 7.1172 | -0.0167 | 0.5913 | 22.2833 | 0.1055 | -0.7418 |
| 4/22/2019 19:25 | 0.8833 | 0.3167  | 7.0501 | 0.2167  | 0.5913 | 22.52   | 0.1112 | -0.7418 |
| 4/22/2019 19:26 | 0.8833 | 0.2333  | 7.2243 | 0.5167  | 0.5913 | 23.3455 | 0.1061 | -0.7418 |
| 4/22/2019 19:27 | 0.8083 | 0.65    | 7.1913 | 0.35    | 0.5913 | 24.0818 | 0.1087 | -0.7418 |
| 4/22/2019 19:28 | 0.8    | 0.5     | 6.9278 | 0.1167  | 0.5913 | 23.3364 | 0.112  | -0.7418 |
| 4/22/2019 19:29 | 0.8    | 0.6     | 7.1225 | 0.1833  | 0.5913 | 21.9917 | 0.1049 | -0.7418 |
| 4/22/2019 19:30 | 0.7667 | 0.9583  | 7.1367 | -0.2    | 0.5913 | 20.8909 | 0.1207 | -0.7418 |
| 4/22/2019 19:31 | 0.8    | 0.475   | 6.7855 | 0.2333  | 0.5913 | 19.55   | 0.1083 | -0.7418 |
| 4/22/2019 19:32 | 0.8    | 0.7833  | 7.1039 | 0.15    | 0.5913 | 19.3    | 0.1074 | -0.7418 |
| 4/22/2019 19:33 | 0.8    | 0.4833  | 6.8218 | 0.5167  | 0.5913 | 19.3636 | 0.1126 | -0.7418 |
| 4/22/2019 19:34 | 0.7818 | 0.0667  | 6.7369 | 0.2333  | 0.5913 | 19.65   | 0.099  | -0.7418 |
| 4/22/2019 19:35 | 0.7833 | 0.0833  | 7.0708 | 0.1667  | 0.5913 | 19.7667 | 0.1065 | -0.7418 |
| 4/22/2019 19:36 | 0.75   | 0.1083  | 6.9922 | 0.2     | 0.5913 | 19.6455 | 0.096  | -0.7418 |
| 4/22/2019 19:37 | 0.725  | 0.1667  | 7.2213 | 0.0167  | 0.5913 | 18.5667 | 0.1058 | -0.7418 |
| 4/22/2019 19:38 | 0.7167 | 0.4     | 7.0213 | 0.2167  | 0.5913 | 16.7455 | 0.1083 | -0.7418 |
| 4/22/2019 19:39 | 0.8    | 0.6417  | 6.8674 | 0.5333  | 0.5913 | 14.9833 | 0.1002 | -0.7418 |
| 4/22/2019 19:40 | 0.7333 | -0.0833 | 6.8369 | 0.65    | 0.5913 | 14.4    | 0.1115 | -0.7418 |
| 4/22/2019 19:41 | 0.7    | 1.025   | 6.9024 | 0.4833  | 0.5913 | 14.4    | 0.0931 | -0.7418 |
| 4/22/2019 19:42 | 0.7    | 0.05    | 6.7468 | -0.1    | 0.5913 | 14.34   | 0.1103 | -0.7418 |
| 4/22/2019 19:43 | 0.7    | 0.3917  | 6.9439 | 0.2     | 0.5913 | 13.95   | 0.0983 | -0.7418 |
| 4/22/2019 19:44 | 0.7    | 1.1333  | 6.9288 | 0.3833  | 0.5913 | 12.8546 | 0.1067 | -0.7418 |
| 4/22/2019 19:45 | 0.7    | 0.9167  | 6.6356 | 0.8667  | 0.5913 | 11.1    | 0.1108 | -0.7418 |
| 4/22/2019 19:46 | 0.7    | 1.15    | 7.1151 | 0.95    | 0.5913 | 9.3727  | 0.0969 | -0.7418 |
| 4/22/2019 19:47 | 0.7    | 0.9417  | 6.6749 | 0.5167  | 0.5913 | 7.6455  | 0.1047 | -0.7418 |
| 4/22/2019 19:48 | 0.75   | 0.3     | 6.8088 | 0.4667  | 0.5913 | 5.8182  | 0.1073 | -0.7418 |
| 4/22/2019 19:49 | 0.7083 | 0.875   | 6.5488 | 0.4667  | 0.5913 | 4.7909  | 0.0949 | -0.7418 |
| 4/22/2019 19:50 | 0.7    | 0.4333  | 6.3617 | -0.2167 | 0.5913 | 4.8     | 0.1055 | -0.7418 |
| 4/22/2019 19:51 | 0.7    | 1.075   | 6.8383 | -0.0167 | 0.5913 | 4.8     | 0.0922 | -0.7418 |
| 4/22/2019 19:52 | 0.7833 | 0.125   | 6.2935 | 0.3     | 0.5913 | 4.8     | 0.1025 | -0.7418 |
| 4/22/2019 19:53 | 0.8    | 0.6     | 6.885  | -0.2    | 0.5913 | 4.7909  | 0.1062 | -0.7418 |
| 4/22/2019 19:54 | 0.7    | 0.875   | 6.8013 | 0.5     | 0.5913 | 4.75    | 0.0946 | -0.7418 |
| 4/22/2019 19:55 | 0.6583 | 1.325   | 6.516  | 0.7167  | 0.5913 | 4.7     | 0.1019 | -0.7418 |
| 4/22/2019 19:56 | 0.6    | 0.5333  | 6.6963 | 0.6833  | 0.5913 | 4.7     | 0.0908 | -0.7418 |

|                 |        |         |        |         |        |        |        |         |
|-----------------|--------|---------|--------|---------|--------|--------|--------|---------|
| 4/22/2019 19:57 | 0.5833 | 0.7     | 6.5929 | 0.3667  | 0.5913 | 4.7    | 0.1022 | -0.7418 |
| 4/22/2019 19:58 | 0.575  | -0.2167 | 6.4831 | 0.45    | 0.5913 | 4.7    | 0.0996 | -0.7418 |
| 4/22/2019 19:59 | 0.6    | 0.6     | 6.7165 | 0.2167  | 0.5913 | 4.7    | 0.095  | -0.7418 |
| 4/22/2019 20:00 | 0.6    | 0.6083  | 6.5138 | 0.5833  | 0.5913 | 4.6    | 0.1117 | -0.7418 |
| 4/22/2019 20:01 | 0.6    | 0.9583  | 6.6043 | 0.0333  | 0.5913 | 4.6    | 0.0913 | -0.7418 |
| 4/22/2019 20:02 | 0.6333 | -0.025  | 6.6705 | 0.15    | 0.5913 | 4.525  | 0.0982 | -0.7418 |
| 4/22/2019 20:03 | 0.6    | 0.925   | 6.4196 | -0.0167 | 0.5913 | 4.5    | 0.094  | -0.7418 |
| 4/22/2019 20:04 | 0.625  | 1.5667  | 6.8277 | -0.5833 | 0.5913 | 4.5    | 0.0971 | -0.7418 |
| 4/22/2019 20:05 | 0.6    | 0.525   | 6.7733 | 0.6667  | 0.5913 | 4.5    | 0.0973 | -0.7418 |
| 4/22/2019 20:06 | 0.6    | 0.7917  | 6.2573 | 0.1     | 0.5913 | 4.5    | 0.0912 | -0.7418 |
| 4/22/2019 20:07 | 0.6    | 0.3917  | 6.6138 | 0.7     | 0.5913 | 4.5    | 0.1095 | -0.7418 |
| 4/22/2019 20:08 | 0.6333 | 1.6333  | 6.7348 | 0.2833  | 0.5913 | 4.5    | 0.0961 | -0.7418 |
| 4/22/2019 20:09 | 0.7    | 0.5917  | 6.4042 | 0.1167  | 0.5913 | 4.5    | 0.0932 | -0.7418 |
| 4/22/2019 20:10 | 0.7    | 0.6583  | 6.4948 | 0.5     | 0.5913 | 4.5    | 0.1092 | -0.7418 |
| 4/22/2019 20:11 | 0.7    | 0.0833  | 6.31   | 0.5333  | 0.5913 | 4.44   | 0.0939 | -0.7418 |
| 4/22/2019 20:12 | 0.7    | 0.6     | 6.4255 | 0.4833  | 0.5913 | 4.4    | 0.0995 | -0.7418 |
| 4/22/2019 20:13 | 0.8    | 0.7     | 6.6145 | 0.35    | 0.5913 | 4.4    | 0.0986 | -0.7418 |
| 4/22/2019 20:14 | 0.8    | -0.2583 | 6.4813 | 0.05    | 0.5913 | 4.5    | 0.101  | -0.7418 |
| 4/22/2019 20:15 | 0.8    | -0.325  | 6.492  | 0.2667  | 0.5913 | 4.5    | 0.1028 | -0.7418 |
| 4/22/2019 20:16 | 0.8    | 0.75    | 6.4538 | -0.4333 | 0.5913 | 4.5    | 0.0918 | -0.7418 |
| 4/22/2019 20:17 | 0.8    | 0.3     | 6.3252 | -0.05   | 0.5913 | 4.5    | 0.1059 | -0.7418 |
| 4/22/2019 20:18 | 0.8    | 0.4333  | 6.65   | 0.05    | 0.5913 | 4.5    | 0.0979 | -0.7418 |
| 4/22/2019 20:19 | 0.875  | 0.8417  | 6.6162 | -0.2    | 0.5913 | 4.5    | 0.1009 | -0.7418 |
| 4/22/2019 20:20 | 0.9    | 0.225   | 6.525  | 0.0667  | 0.5913 | 4.5    | 0.1116 | -0.7418 |
| 4/22/2019 20:21 | 0.8833 | 0.9167  | 6.5745 | 0.15    | 0.5913 | 4.5    | 0.097  | -0.7418 |
| 4/22/2019 20:22 | 0.9083 | 0.275   | 6.5677 | 0.35    | 0.5913 | 4.5    | 0.1098 | -0.7418 |
| 4/22/2019 20:23 | 1      | 0.875   | 6.227  | 0.4667  | 0.5913 | 4.57   | 0.0999 | -0.7418 |
| 4/22/2019 20:24 | 1      | 0.4083  | 6.6163 | 1       | 0.5913 | 4.6    | 0.1005 | -0.7418 |
| 4/22/2019 20:25 | 1      | 0.7417  | 6.618  | 0.5833  | 0.5913 | 4.6    | 0.1118 | -0.7418 |
| 4/22/2019 20:26 | 1      | 1.15    | 6.4458 | 0.4     | 0.5913 | 4.6    | 0.0939 | -0.7418 |
| 4/22/2019 20:27 | 1      | 1.3833  | 6.2692 | 0.4     | 0.5913 | 4.6    | 0.1106 | -0.7418 |
| 4/22/2019 20:28 | 1      | 1.1833  | 6.4865 | 0.3833  | 0.5913 | 4.5    | 0.0982 | -0.7418 |
| 4/22/2019 20:29 | 1      | 0.8333  | 6.4865 | 0.5333  | 0.5913 | 4.5    | 0.1026 | -0.7418 |
| 4/22/2019 20:30 | 0.9667 | 0.5333  | 6.1172 | 0.7333  | 0.5913 | 4.5    | 0.1106 | -0.7418 |
| 4/22/2019 20:31 | 0.9    | 1.2     | 6.3895 | 0.7667  | 0.5913 | 4.4455 | 0.1027 | -0.7418 |
| 4/22/2019 20:32 | 0.9    | 0.875   | 6.5252 | 0.3833  | 0.5913 | 4.3909 | 0.1124 | -0.7418 |
| 4/22/2019 20:33 | 0.9    | 0.5917  | 6.5263 | 0.4333  | 0.5913 | 4.3    | 0.1063 | -0.7418 |
| 4/22/2019 20:34 | 0.8833 | 0.4417  | 6.437  | 0.3833  | 0.5913 | 4.3    | 0.1058 | -0.7418 |
| 4/22/2019 20:35 | 0.8833 | 0.6917  | 6.5142 | 0.4833  | 0.5913 | 4.3    | 0.1109 | -0.7418 |
| 4/22/2019 20:36 | 0.9    | 0.6917  | 6.3345 | -0.2667 | 0.5913 | 4.3    | 0.0977 | -0.7418 |
| 4/22/2019 20:37 | 0.9    | 0.85    | 6.69   | 0.15    | 0.5913 | 4.3    | 0.1208 | -0.7418 |
| 4/22/2019 20:38 | 0.9    | 0.0667  | 6.228  | -0.15   | 0.5913 | 4.2818 | 0.1044 | -0.7418 |
| 4/22/2019 20:39 | 0.8417 | 0.5833  | 6.1148 | -0.3333 | 0.5913 | 4.2    | 0.106  | -0.7418 |
| 4/22/2019 20:40 | 0.8    | 0.7167  | 6.3088 | -0.5167 | 0.5913 | 4.2    | 0.1093 | -0.7418 |
| 4/22/2019 20:41 | 0.8    | 0.75    | 6.4358 | 0.6667  | 0.5913 | 4.2833 | 0.1039 | -0.7418 |
| 4/22/2019 20:42 | 0.8    | 0.8583  | 6.3432 | 0.4667  | 0.5913 | 4.3    | 0.1115 | -0.7418 |
| 4/22/2019 20:43 | 0.8    | 1.1917  | 6.281  | 0.25    | 0.5913 | 4.3    | 0.0966 | -0.7418 |

|                 |        |        |        |         |        |        |        |         |
|-----------------|--------|--------|--------|---------|--------|--------|--------|---------|
| 4/22/2019 20:44 | 0.7167 | 0.9083 | 6.248  | 0.4167  | 0.5913 | 4.36   | 0.1133 | -0.7418 |
| 4/22/2019 20:45 | 0.7    | 0.8667 | 6.5072 | 0.4167  | 0.5913 | 4.4182 | 0.1104 | -0.7418 |
| 4/22/2019 20:46 | 0.6833 | 0.2333 | 6.4197 | 0.1667  | 0.5913 | 4.4182 | 0.1029 | -0.7418 |
| 4/22/2019 20:47 | 0.6917 | 0.5083 | 6.1245 | 0.8167  | 0.5913 | 4.4    | 0.1128 | -0.7418 |
| 4/22/2019 20:48 | 0.7    | 0.5333 | 6.0688 | 0.2333  | 0.5913 | 4.4    | 0.1023 | -0.7418 |
| 4/22/2019 20:49 | 0.7    | 0.4417 | 6.4577 | 0.5667  | 0.5913 | 4.4    | 0.1128 | -0.7418 |
| 4/22/2019 20:50 | 0.7167 | 0.9    | 6.1348 | 0.8667  | 0.5913 | 4.4    | 0.1089 | -0.7418 |
| 4/22/2019 20:51 | 0.7667 | 1.0833 | 5.9037 | 0.55    | 0.5913 | 4.4    | 0.1078 | -0.7418 |
| 4/22/2019 20:52 | 0.7917 | 0.6167 | 6.3502 | 0.1833  | 0.5913 | 4.4    | 0.1198 | -0.7418 |
| 4/22/2019 20:53 | 0.7083 | 0.8667 | 6.194  | 0.2167  | 0.5913 | 4.4    | 0.1015 | -0.7418 |
| 4/22/2019 20:54 | 0.7    | 0.4    | 6.1787 | 0.3333  | 0.5913 | 4.4    | 0.1102 | -0.7418 |
| 4/22/2019 20:55 | 0.7    | 0.6917 | 6.2873 | -0.2833 | 0.5913 | 4.4    | 0.1149 | -0.7418 |
| 4/22/2019 20:56 | 0.7    | 0.3667 | 6.252  | -0.0167 | 0.5913 | 4.3091 | 0.1038 | -0.7418 |
| 4/22/2019 20:57 | 0.7    | 0.1167 | 6.308  | 0.9333  | 0.5913 | 4.3    | 0.1195 | -0.7418 |
| 4/22/2019 20:58 | 0.7    | 0.4167 | 6.336  | 0.1333  | 0.5913 | 4.3    | 0.1065 | -0.7418 |
| 4/22/2019 20:59 | 0.7083 | 0.8167 | 6.233  | 0.0833  | 0.5913 | 4.3    | 0.1142 | -0.7418 |
| 4/22/2019 21:00 | 0.7167 | 0.3417 | 6.4728 | 0.1833  | 0.5913 | 4.3    | 0.1113 | -0.7418 |
| 4/22/2019 21:01 | 0.7333 | 0.3    | 5.9153 | 0.3833  | 0.5913 | 4.3    | 0.1072 | -0.7418 |
| 4/22/2019 21:02 | 0.8    | 0.975  | 6.3352 | 0.6667  | 0.5913 | 4.3    | 0.122  | -0.7418 |
| 4/22/2019 21:03 | 0.825  | 0.4333 | 5.8985 | 0.1167  | 0.5913 | 4.3    | 0.1042 | -0.7418 |
| 4/22/2019 21:04 | 0.8417 | 0.1333 | 5.865  | -0.0167 | 0.5913 | 4.3    | 0.1187 | -0.7418 |
| 4/22/2019 21:05 | 0.8833 | 0.7083 | 6.1383 | 0.1     | 0.5913 | 4.3    | 0.1083 | -0.7418 |
| 4/22/2019 21:06 | 0.9    | 1.1667 | 6.0228 | 0.9     | 0.5913 | 4.3    | 0.1169 | -0.7418 |
| 4/22/2019 21:07 | 0.9    | 1.1167 | 5.8015 | 0.1167  | 0.5913 | 4.3    | 0.1178 | -0.7418 |
| 4/22/2019 21:08 | 0.9083 | 0.675  | 6.0315 | 0.35    | 0.5913 | 4.3    | 0.1036 | -0.7418 |
| 4/22/2019 21:09 | 0.9667 | 0.3417 | 5.8007 | 0.3333  | 0.5913 | 4.3    | 0.1222 | -0.7418 |
| 4/22/2019 21:10 | 0.9333 | -0.375 | 5.8798 | 0.05    | 0.5913 | 4.3    | 0.1122 | -0.7418 |
| 4/22/2019 21:11 | 0.9667 | 0.225  | 6.0638 | 0.6667  | 0.5913 | 4.22   | 0.1118 | -0.7418 |
| 4/22/2019 21:12 | 0.9    | 0.3667 | 6.063  | 0.2333  | 0.5913 | 4.2833 | 0.1131 | -0.7418 |
| 4/22/2019 21:13 | 0.975  | -0.425 | 6.0598 | 0.3667  | 0.5913 | 4.3    | 0.1116 | -0.7418 |
| 4/22/2019 21:14 | 1      | 0.8333 | 6.083  | 0.3     | 0.5913 | 4.3    | 0.1237 | -0.7418 |
| 4/22/2019 21:15 | 1.0818 | 1.0833 | 5.9182 | 0.3     | 0.5913 | 4.2455 | 0.1105 | -0.7418 |
| 4/22/2019 21:16 | 1.0333 | 0.1167 | 5.9948 | 0.1667  | 0.5913 | 4.2    | 0.1268 | -0.7418 |
| 4/22/2019 21:17 | 1      | 0.95   | 5.77   | 1.0167  | 0.5913 | 4.2    | 0.1098 | -0.7418 |
| 4/22/2019 21:18 | 1      | 0.7    | 5.6022 | 0.2     | 0.5913 | 4.2    | 0.1189 | -0.7418 |
| 4/22/2019 21:19 | 1      | 0.6    | 5.7882 | 0.5167  | 0.5913 | 4.2    | 0.1198 | -0.7418 |
| 4/22/2019 21:20 | 1      | 0.8583 | 5.5745 | -0.05   | 0.5913 | 4.2    | 0.1104 | -0.7418 |
| 4/22/2019 21:21 | 1      | 0.4083 | 5.5742 | -0.1667 | 0.5913 | 4.2    | 0.1201 | -0.7418 |
| 4/22/2019 21:22 | 0.9167 | 0.4583 | 5.8197 | -0.4167 | 0.5913 | 4.2    | 0.1087 | -0.7418 |
| 4/22/2019 21:23 | 0.9    | 0.7583 | 5.7862 | 0.3333  | 0.5913 | 4.2    | 0.126  | -0.7418 |
| 4/22/2019 21:24 | 0.9    | 0      | 5.6233 | -0.15   | 0.5913 | 4.2    | 0.1079 | -0.7418 |
| 4/22/2019 21:25 | 0.9167 | 0.2667 | 5.741  | 0.4833  | 0.5913 | 4.2    | 0.1127 | -0.7418 |
| 4/22/2019 21:26 | 0.9917 | 0.7083 | 5.6775 | 0.35    | 0.5913 | 4.2    | 0.1224 | -0.7418 |
| 4/22/2019 21:27 | 0.9667 | 0.3917 | 5.9905 | -0.2833 | 0.5913 | 4.2    | 0.1037 | -0.7418 |
| 4/22/2019 21:28 | 0.9    | 0.3667 | 5.8583 | 0       | 0.5913 | 4.2364 | 0.1257 | -0.7418 |
| 4/22/2019 21:29 | 0.9    | 1.125  | 5.773  | 0.0833  | 0.5913 | 4.3    | 0.1085 | -0.7418 |
| 4/22/2019 21:30 | 0.8917 | 0.325  | 5.647  | -0.2167 | 0.5913 | 4.2333 | 0.121  | -0.7418 |

|                 |        |         |        |         |        |         |        |         |
|-----------------|--------|---------|--------|---------|--------|---------|--------|---------|
| 4/22/2019 21:31 | 0.825  | 0.6917  | 5.7213 | 0.3     | 0.5913 | 4.2727  | 0.1149 | -0.7418 |
| 4/22/2019 21:32 | 0.7583 | 0.2417  | 5.3865 | 0.55    | 0.5913 | 4.2909  | 0.1055 | -0.7418 |
| 4/22/2019 21:33 | 0.775  | 0.05    | 5.3802 | 0.4833  | 0.5913 | 4.3     | 0.1219 | -0.7418 |
| 4/22/2019 21:34 | 0.7    | 0.3417  | 5.6469 | 0.2167  | 0.5913 | 4.3     | 0.104  | -0.7418 |
| 4/22/2019 21:35 | 0.7    | 0.55    | 5.8573 | 0.4167  | 0.5913 | 4.3     | 0.1191 | -0.7418 |
| 4/22/2019 21:36 | 0.7    | 0.4417  | 5.7828 | 0.1     | 0.5913 | 4.3     | 0.1163 | -0.7418 |
| 4/22/2019 21:37 | 0.7    | -0.0417 | 5.706  | 0.1833  | 0.5913 | 4.3     | 0.1102 | -0.7418 |
| 4/22/2019 21:38 | 0.675  | 0.7417  | 5.6225 | 0.05    | 0.5913 | 4.3     | 0.1269 | -0.7418 |
| 4/22/2019 21:39 | 0.6167 | -0.0917 | 5.7498 | -0.05   | 0.5913 | 4.3     | 0.1052 | -0.7418 |
| 4/22/2019 21:40 | 0.6    | 0.5917  | 5.5919 | 0.15    | 0.5913 | 4.3     | 0.1198 | -0.7418 |
| 4/22/2019 21:41 | 0.6    | 0.3167  | 5.4419 | 0.1667  | 0.5913 | 4.3333  | 0.106  | -0.7418 |
| 4/22/2019 21:42 | 0.6    | -0.125  | 5.7072 | 0.4333  | 0.5913 | 4.4     | 0.1194 | -0.7418 |
| 4/22/2019 21:43 | 0.6    | 1.05    | 5.6153 | 0.1667  | 0.5913 | 4.4     | 0.1162 | -0.7418 |
| 4/22/2019 21:44 | 0.6    | 0.0917  | 5.5409 | 0.55    | 0.5913 | 4.4     | 0.1082 | -0.7418 |
| 4/22/2019 21:45 | 0.6    | -0.2583 | 5.5473 | -0.05   | 0.5913 | 4.4     | 0.119  | -0.7418 |
| 4/22/2019 21:46 | 0.6    | 0.3583  | 5.2524 | 0.1667  | 0.5913 | 4.4     | 0.1052 | -0.7418 |
| 4/22/2019 21:47 | 0.675  | 0.1333  | 5.6941 | -0.3    | 0.5913 | 4.4727  | 0.1154 | -0.7418 |
| 4/22/2019 21:48 | 0.7    | -0.05   | 5.7666 | -0.05   | 0.5913 | 4.5     | 0.118  | -0.7418 |
| 4/22/2019 21:49 | 0.7    | 0.6167  | 5.3888 | -0.1833 | 0.5913 | 4.5     | 0.1052 | -0.7418 |
| 4/22/2019 21:50 | 0.625  | 0.775   | 5.5208 | -0.2333 | 0.5913 | 4.5     | 0.1219 | -0.7418 |
| 4/22/2019 21:51 | 0.6    | 0.4417  | 5.6568 | -0.2833 | 0.5913 | 4.5     | 0.1069 | -0.7418 |
| 4/22/2019 21:52 | 0.6    | 0.4167  | 5.4408 | -0.3667 | 0.5913 | 4.5     | 0.1188 | -0.7418 |
| 4/22/2019 21:53 | 0.625  | -0.1583 | 5.3381 | -0.4667 | 0.5913 | 4.5     | 0.109  | -0.7418 |
| 4/22/2019 21:54 | 0.65   | 0.0083  | 5.3953 | -0.3667 | 0.5913 | 4.5     | 0.1144 | -0.7418 |
| 4/22/2019 21:55 | 0.6083 | 0.3417  | 5.4443 | -0.0667 | 0.5913 | 4.5     | 0.1213 | -0.7418 |
| 4/22/2019 21:56 | 0.6083 | 0.0083  | 5.4242 | 0.35    | 0.5913 | 4.5     | 0.1072 | -0.7418 |
| 4/22/2019 21:57 | 0.65   | 0.6167  | 5.4468 | 0.3167  | 0.5913 | 4.5     | 0.123  | -0.7418 |
| 4/22/2019 21:58 | 0.6    | -0.1083 | 5.3773 | 0.0667  | 0.5913 | 4.5     | 0.1116 | -0.7418 |
| 4/22/2019 21:59 | 0.6    | 0.65    | 5.582  | -0.15   | 0.5913 | 4.45    | 0.1126 | -0.7418 |
| 4/22/2019 22:00 | 0.6    | 0.6583  | 5.0181 | -0.2833 | 0.5913 | 4.49    | 0.1177 | -0.7418 |
| 4/22/2019 22:01 | 0.6    | 0.2417  | 5.3897 | -0.3    | 0.5913 | 4.5     | 0.105  | -0.7418 |
| 4/22/2019 22:02 | 0.6    | 0.25    | 5.1656 | -0.4    | 0.5913 | 4.5     | 0.1142 | -0.7418 |
| 4/22/2019 22:03 | 0.5    | 0.3083  | 5.303  | -0.1667 | 0.5913 | 4.5     | 0.1075 | -0.7418 |
| 4/22/2019 22:04 | 0.55   | -0.35   | 5.0139 | -0.1667 | 0.5913 | 4.5     | 0.1178 | -0.7418 |
| 4/22/2019 22:05 | 0.575  | -0.1917 | 5.3779 | -0.2    | 0.5913 | 4.5     | 0.1194 | -0.7418 |
| 4/22/2019 22:06 | 0.525  | -0.0333 | 5.1885 | -0.2167 | 0.5913 | 4.5     | 0.1094 | -0.7418 |
| 4/22/2019 22:07 | 0.5    | 0.2833  | 5.3794 | -0.1167 | 0.5913 | 4.5     | 0.1209 | -0.7418 |
| 4/22/2019 22:08 | 0.5    | -0.0667 | 5.2864 | -0.25   | 0.5913 | 4.5091  | 0.1015 | -0.7418 |
| 4/22/2019 22:09 | 0.5    | 0.1167  | 5.4513 | -0.05   | 0.5913 | 5.2333  | 0.1245 | -0.7418 |
| 4/22/2019 22:10 | 0.5    | 0.075   | 5.2559 | -0.1333 | 0.5913 | 6.6     | 0.1081 | -0.7418 |
| 4/22/2019 22:11 | 0.45   | -0.1417 | 5.2935 | -0.2833 | 0.5913 | 7.9     | 0.1144 | -0.7418 |
| 4/22/2019 22:12 | 0.4083 | 0.5083  | 5.6922 | -0.2    | 0.5913 | 9.075   | 0.1168 | -0.7418 |
| 4/22/2019 22:13 | 0.45   | -0.25   | 5.0685 | -0.2833 | 0.5913 | 10.4546 | 0.1046 | -0.7418 |
| 4/22/2019 22:14 | 0.4167 | 0.525   | 5.4155 | -0.05   | 0.5913 | 12      | 0.1232 | -0.7418 |
| 4/22/2019 22:15 | 0.5    | 0.5     | 5.3942 | -0.5833 | 0.5913 | 13.6917 | 0.1073 | -0.7418 |
| 4/22/2019 22:16 | 0.5    | 0.7083  | 5.2686 | 0.0667  | 0.5913 | 15.3546 | 0.1177 | -0.7418 |
| 4/22/2019 22:17 | 0.5    | 0.425   | 5.2653 | -0.7667 | 0.5913 | 17.1583 | 0.1068 | -0.7418 |

|                 |        |         |        |         |        |         |        |         |
|-----------------|--------|---------|--------|---------|--------|---------|--------|---------|
| 4/22/2019 22:18 | 0.5667 | 0.475   | 5.308  | 0.1     | 0.5913 | 18.79   | 0.1165 | -0.7418 |
| 4/22/2019 22:19 | 0.6    | 0.5167  | 5.2212 | -0.1333 | 0.5913 | 20.5417 | 0.1217 | -0.7418 |
| 4/22/2019 22:20 | 0.6    | -0.15   | 5.3309 | 0.2167  | 0.5913 | 21.7182 | 0.102  | -0.7418 |
| 4/22/2019 22:21 | 0.6    | -0.4083 | 5.4379 | 0.3167  | 0.5913 | 22.0083 | 0.118  | -0.7418 |
| 4/22/2019 22:22 | 0.5833 | 0.3917  | 5.1329 | -0.0667 | 0.5913 | 21.3455 | 0.096  | -0.7418 |
| 4/22/2019 22:23 | 0.6    | 0.6417  | 5.123  | -0.1    | 0.5913 | 20.6909 | 0.1276 | -0.7418 |
| 4/22/2019 22:24 | 0.6    | 0.3583  | 5.2826 | -0.1667 | 0.5913 | 19.5889 | 0.111  | -0.7418 |
| 4/22/2019 22:25 | 0.6833 | 0.15    | 5.1893 | 0.3167  | 0.5913 | 19.3091 | 0.1179 | -0.7418 |
| 4/22/2019 22:26 | 0.7    | -0.55   | 5.0772 | -0.0667 | 0.5913 | 18.6364 | 0.117  | -0.7418 |
| 4/22/2019 22:27 | 0.7    | -0.275  | 5.2667 | -0.2333 | 0.5913 | 18.3636 | 0.1072 | -0.7418 |
| 4/22/2019 22:28 | 0.7    | 0.1667  | 5.0969 | -0.1    | 0.5913 | 18.2    | 0.1211 | -0.7418 |
| 4/22/2019 22:29 | 0.7    | 0.5667  | 5.171  | -0.0167 | 0.5913 | 18.14   | 0.1101 | -0.7418 |
| 4/22/2019 22:30 | 0.625  | 0.4833  | 5.0652 | 0.2667  | 0.5913 | 18.03   | 0.1199 | -0.7418 |
| 4/22/2019 22:31 | 0.6    | 0.4083  | 4.8095 | -0.15   | 0.5913 | 17.9    | 0.116  | -0.7418 |
| 4/22/2019 22:32 | 0.6    | 0.2583  | 5.3571 | -0.3    | 0.5913 | 18.2091 | 0.1101 | -0.7418 |
| 4/22/2019 22:33 | 0.6833 | 0.175   | 5.081  | -0.5    | 0.5913 | 19.27   | 0.1218 | -0.7418 |
| 4/22/2019 22:34 | 0.7    | 0.5667  | 5.0248 | 0.05    | 0.5913 | 20.12   | 0.1091 | -0.7418 |
| 4/22/2019 22:35 | 0.7    | 0.875   | 5.0877 | -0.3    | 0.5913 | 21.1273 | 0.1152 | -0.7418 |
| 4/22/2019 22:36 | 0.7    | 0.35    | 5.2503 | -0.3333 | 0.5913 | 22.5    | 0.1195 | -0.7418 |
| 4/22/2019 22:37 | 0.7    | 0.425   | 5.0348 | -0.1167 | 0.5913 | 23      | 0.1155 | -0.7418 |
| 4/22/2019 22:38 | 0.6417 | 0.2167  | 5.1256 | 0.2     | 0.5913 | 23.3364 | 0.1181 | -0.7418 |
| 4/22/2019 22:39 | 0.6    | -0.3    | 5.1259 | -0.1333 | 0.5913 | 23.45   | 0.106  | -0.7418 |
| 4/22/2019 22:40 | 0.6    | 0.3667  | 5.1813 | -0.0167 | 0.5913 | 23.7091 | 0.1161 | -0.7418 |
| 4/22/2019 22:41 | 0.6    | 0.225   | 4.8629 | 0.1167  | 0.5913 | 23.5364 | 0.1128 | -0.7418 |
| 4/22/2019 22:42 | 0.675  | -0.1583 | 5.0951 | 0.2833  | 0.5913 | 23.525  | 0.1049 | -0.7418 |
| 4/22/2019 22:43 | 0.7    | -0.05   | 5.0889 | 0.3     | 0.5913 | 23.79   | 0.1165 | -0.7418 |
| 4/22/2019 22:44 | 0.7    | 0.2333  | 5.2311 | 0.4     | 0.5913 | 23.8    | 0.1074 | -0.7418 |
| 4/22/2019 22:45 | 0.6818 | 0.5583  | 5.2054 | -0.0167 | 0.5913 | 23.95   | 0.1214 | -0.7418 |
| 4/22/2019 22:46 | 0.65   | -0.2083 | 4.9723 | -0.3333 | 0.5913 | 24.05   | 0.1061 | -0.7418 |
| 4/22/2019 22:47 | 0.6    | -0.4167 | 4.9216 | -0.1    | 0.5913 | 24.2833 | 0.1159 | -0.7418 |
| 4/22/2019 22:48 | 0.6    | 0.1583  | 4.8213 | -0.4    | 0.5913 | 24.4417 | 0.1142 | -0.7418 |
| 4/22/2019 22:49 | 0.6917 | 0.4667  | 4.8577 | -0.2    | 0.5913 | 24.8636 | 0.1086 | -0.7418 |
| 4/22/2019 22:50 | 0.7    | -0.425  | 4.9257 | -0.2167 | 0.5913 | 25.4083 | 0.1157 | -0.7418 |
| 4/22/2019 22:51 | 0.7    | 0.175   | 4.7489 | -0.3667 | 0.5913 | 25.8727 | 0.1033 | -0.7418 |
| 4/22/2019 22:52 | 0.6083 | 0.175   | 5.1918 | -0.45   | 0.5913 | 25.8333 | 0.1129 | -0.7418 |
| 4/22/2019 22:53 | 0.6    | -0.325  | 5.051  | -0.1833 | 0.5913 | 26.0333 | 0.1144 | -0.7418 |
| 4/22/2019 22:54 | 0.6    | 0       | 4.7348 | -0.2167 | 0.5913 | 26.225  | 0.1073 | -0.7418 |
| 4/22/2019 22:55 | 0.6    | 0.05    | 5.1666 | -0.1667 | 0.5913 | 25.9455 | 0.1157 | -0.7418 |
| 4/22/2019 22:56 | 0.6083 | -0.2167 | 4.9973 | -0.3667 | 0.5913 | 24.975  | 0.1039 | -0.7418 |
| 4/22/2019 22:57 | 0.6    | 0.0333  | 5.0028 | -0.7333 | 0.5913 | 24.8111 | 0.1135 | -0.7418 |
| 4/22/2019 22:58 | 0.6    | 0.25    | 4.8118 | -0.1167 | 0.5913 | 24.8    | 0.1167 | -0.7418 |
| 4/22/2019 22:59 | 0.6    | 0.1583  | 4.7156 | 0.2333  | 0.5913 | 24.82   | 0.1077 | -0.7418 |
| 4/22/2019 23:00 | 0.6    | 0.2     | 4.9169 | -0.45   | 0.5913 | 24.9    | 0.114  | -0.7418 |
| 4/22/2019 23:01 | 0.6    | 0.0167  | 5.046  | -0.2333 | 0.5913 | 24.9909 | 0.0987 | -0.7418 |
| 4/22/2019 23:02 | 0.6    | 0.225   | 5.0476 | 0       | 0.5913 | 25      | 0.1123 | -0.7418 |
| 4/22/2019 23:03 | 0.6    | 0.375   | 4.8356 | -0.0667 | 0.5913 | 25.15   | 0.1142 | -0.7418 |
| 4/22/2019 23:04 | 0.6    | -0.2083 | 4.9228 | 0.1167  | 0.5913 | 25.375  | 0.1102 | -0.7418 |

|                 |        |         |        |         |        |         |        |         |
|-----------------|--------|---------|--------|---------|--------|---------|--------|---------|
| 4/22/2019 23:05 | 0.6167 | -0.075  | 4.9855 | -0.0667 | 0.5913 | 25.5167 | 0.1201 | -0.7418 |
| 4/22/2019 23:06 | 0.7    | 0.6333  | 4.9575 | -0.3667 | 0.5913 | 25.625  | 0.1004 | -0.7418 |
| 4/22/2019 23:07 | 0.6917 | -0.0333 | 4.9495 | -0.6833 | 0.5913 | 25.9333 | 0.1227 | -0.7418 |
| 4/22/2019 23:08 | 0.65   | -0.0167 | 4.796  | -0.25   | 0.5913 | 26.9833 | 0.1096 | -0.7418 |
| 4/22/2019 23:09 | 0.6    | 0.5833  | 5.0525 | -0.5167 | 0.5913 | 27.3273 | 0.1187 | -0.7418 |
| 4/22/2019 23:10 | 0.6    | 0.275   | 4.6525 | -0.4833 | 0.5913 | 27.4    | 0.1023 | -0.7418 |
| 4/22/2019 23:11 | 0.6    | 0.3167  | 4.9315 | -0.25   | 0.5913 | 27.4    | 0.1075 | -0.7418 |
| 4/22/2019 23:12 | 0.6083 | -0.3583 | 4.6483 | 0.25    | 0.5913 | 27.4    | 0.1167 | -0.7418 |
| 4/22/2019 23:13 | 0.6583 | -0.05   | 4.8632 | 0.05    | 0.5913 | 27.3727 | 0.1037 | -0.7418 |
| 4/22/2019 23:14 | 0.6083 | 0.85    | 4.9837 | -0.3    | 0.5913 | 27.3333 | 0.1224 | -0.7418 |
| 4/22/2019 23:15 | 0.6636 | 0.3583  | 4.7498 | -0.1333 | 0.5913 | 27.2909 | 0.1117 | -0.7418 |
| 4/22/2019 23:16 | 0.6917 | 0.0833  | 5.0128 | -0.4333 | 0.5913 | 27.1083 | 0.1135 | -0.7418 |
| 4/22/2019 23:17 | 0.6917 | -0.1833 | 4.91   | -0.1    | 0.5913 | 26.8909 | 0.1143 | -0.7418 |
| 4/22/2019 23:18 | 0.6333 | 0.1667  | 4.708  | 0.3     | 0.5913 | 26.675  | 0.1032 | -0.7418 |
| 4/22/2019 23:19 | 0.625  | -0.3917 | 4.7808 | -0.45   | 0.5913 | 26.1364 | 0.12   | -0.7418 |
| 4/22/2019 23:20 | 0.6    | 0.7167  | 4.6967 | -0.2833 | 0.5913 | 25.9455 | 0.1036 | -0.7418 |
| 4/22/2019 23:21 | 0.6    | 0.1167  | 4.6432 | -0.3167 | 0.5913 | 25.44   | 0.1183 | -0.7418 |
| 4/22/2019 23:22 | 0.6    | 0.025   | 4.9363 | -0.4667 | 0.5913 | 24.6364 | 0.1127 | -0.7418 |
| 4/22/2019 23:23 | 0.6    | 1.025   | 5.0093 | -0.8167 | 0.5913 | 23.0818 | 0.107  | -0.7418 |
| 4/22/2019 23:24 | 0.6    | 0.5167  | 4.7873 | 0.3333  | 0.5913 | 21.2083 | 0.1151 | -0.7418 |
| 4/22/2019 23:25 | 0.6    | 0.05    | 5.0588 | -0.1833 | 0.5913 | 19.67   | 0.1018 | -0.7418 |
| 4/22/2019 23:26 | 0.6    | 0.0333  | 5.0908 | -0.0833 | 0.5913 | 18.1    | 0.1216 | -0.7418 |
| 4/22/2019 23:27 | 0.65   | 0.275   | 4.8252 | 0.3667  | 0.5913 | 16.7182 | 0.1029 | -0.7418 |
| 4/22/2019 23:28 | 0.6667 | -0.0417 | 5.0718 | -0.3    | 0.5913 | 15.4273 | 0.1147 | -0.7418 |
| 4/22/2019 23:29 | 0.6833 | 0.575   | 4.8042 | -0.1667 | 0.5913 | 13.7833 | 0.104  | -0.7418 |
| 4/22/2019 23:30 | 0.6417 | 0.4917  | 4.5095 | -0.1667 | 0.5913 | 12.15   | 0.1139 | -0.7418 |
| 4/22/2019 23:31 | 0.6    | 0.1     | 4.9803 | -0.55   | 0.5913 | 10.7818 | 0.1162 | -0.7418 |
| 4/22/2019 23:32 | 0.6    | -0.4917 | 5.0353 | 0       | 0.5913 | 9.2273  | 0.1023 | -0.7418 |
| 4/22/2019 23:33 | 0.6    | 1.15    | 4.906  | -0.2333 | 0.5913 | 8.075   | 0.1144 | -0.7418 |
| 4/22/2019 23:34 | 0.6    | 0.2     | 4.6363 | -0.1333 | 0.5913 | 7.075   | 0.1085 | -0.7418 |
| 4/22/2019 23:35 | 0.6    | 0.1417  | 5.0075 | -0.0167 | 0.5913 | 6.7     | 0.1116 | -0.7418 |
| 4/22/2019 23:36 | 0.6    | 0.45    | 5.0523 | -0.25   | 0.5913 | 6.77    | 0.1109 | -0.7418 |
| 4/22/2019 23:37 | 0.6    | 0.4833  | 4.9787 | 0.35    | 0.5913 | 6.75    | 0.1055 | -0.7418 |
| 4/22/2019 23:38 | 0.6    | 0.1583  | 5.0288 | -0.25   | 0.5913 | 6.9417  | 0.1111 | -0.7418 |
| 4/22/2019 23:39 | 0.6    | -0.45   | 4.8438 | -0.2    | 0.5913 | 6.875   | 0.0977 | -0.7418 |
| 4/22/2019 23:40 | 0.6    | 0.4167  | 4.89   | -0.0333 | 0.5913 | 6.9833  | 0.1102 | -0.7418 |
| 4/22/2019 23:41 | 0.5917 | 0.9417  | 4.7108 | -0.1667 | 0.5913 | 8.5     | 0.1063 | -0.7418 |
| 4/22/2019 23:42 | 0.5083 | 0.2333  | 4.3675 | -0.0833 | 0.5913 | 9.75    | 0.1061 | -0.7418 |
| 4/22/2019 23:43 | 0.575  | 0.3667  | 4.6865 | 0.7167  | 0.5913 | 10.8273 | 0.1132 | -0.7418 |
| 4/22/2019 23:44 | 0.5833 | -0.175  | 4.8793 | -0.2    | 0.5913 | 12.45   | 0.0974 | -0.7418 |
| 4/22/2019 23:45 | 0.6    | -0.4667 | 4.6973 | -0.25   | 0.5913 | 14.1182 | 0.1108 | -0.7418 |
| 4/22/2019 23:46 | 0.6    | 0.2583  | 4.7365 | -0.1    | 0.5913 | 15.5546 | 0.102  | -0.7418 |
| 4/22/2019 23:47 | 0.6    | -0.0417 | 4.7858 | -0.3167 | 0.5913 | 17.2    | 0.1126 | -0.7418 |
| 4/22/2019 23:48 | 0.6    | -0.6083 | 4.8078 | 0.2333  | 0.5913 | 18.825  | 0.1068 | -0.7418 |
| 4/22/2019 23:49 | 0.6    | 0       | 4.6717 | 0.1667  | 0.5913 | 20.46   | 0.1103 | -0.7418 |
| 4/22/2019 23:50 | 0.6    | 0.0833  | 4.5297 | -0.5833 | 0.5913 | 21.7273 | 0.1227 | -0.7418 |
| 4/22/2019 23:51 | 0.5083 | 0.45    | 4.8475 | 0.1     | 0.5913 | 22.6111 | 0.1039 | -0.7418 |

|                 |        |         |        |         |        |         |        |         |
|-----------------|--------|---------|--------|---------|--------|---------|--------|---------|
| 4/22/2019 23:52 | 0.525  | -0.0167 | 4.4197 | -0.0667 | 0.5913 | 23.1667 | 0.1178 | -0.7418 |
| 4/22/2019 23:53 | 0.6    | 0.0917  | 4.6003 | -0.2    | 0.5913 | 23.1727 | 0.1082 | -0.7418 |
| 4/22/2019 23:54 | 0.6    | 0.475   | 4.4927 | -0.15   | 0.5913 | 22.2667 | 0.1151 | -0.7418 |
| 4/22/2019 23:55 | 0.6    | 0.5417  | 4.6262 | 0.0667  | 0.5913 | 21.4636 | 0.1148 | -0.7418 |
| 4/22/2019 23:56 | 0.6    | 0.3583  | 4.732  | 0.15    | 0.5913 | 19.8667 | 0.0978 | -0.7418 |
| 4/22/2019 23:57 | 0.6    | 0.0917  | 4.6082 | 0.0167  | 0.5913 | 18.2    | 0.1142 | -0.7418 |
| 4/22/2019 23:58 | 0.6    | 0.125   | 4.5705 | -0.2667 | 0.5913 | 16.3727 | 0.0959 | -0.7418 |
| 4/22/2019 23:59 | 0.6    | -0.375  | 4.8223 | 0.15    | 0.5913 | 14.6333 | 0.114  | -0.7418 |
| 4/23/2019 0:00  | 0.6    | 0.025   | 4.6342 | -0.1667 | 0.5913 | 13.0091 | 0.1071 | -0.7418 |
| 4/23/2019 0:01  | 0.6667 | 0.3583  | 4.5945 | -0.35   | 0.5913 | 11.4167 | 0.1036 | -0.7418 |
| 4/23/2019 0:02  | 0.7    | -0.075  | 4.5373 | -0.1    | 0.5913 | 9.9     | 0.1139 | -0.7418 |
| 4/23/2019 0:03  | 0.7    | -0.4583 | 4.6783 | -0.3333 | 0.5913 | 8.5273  | 0.0963 | -0.7418 |
| 4/23/2019 0:04  | 0.6833 | -0.3    | 4.7093 | 0.0167  | 0.5913 | 8.41    | 0.114  | -0.7418 |
| 4/23/2019 0:05  | 0.6083 | -0.375  | 4.4182 | 0.05    | 0.5913 | 7.7364  | 0.1015 | -0.7418 |
| 4/23/2019 0:06  | 0.6917 | 0.4583  | 4.5765 | -0.05   | 0.5913 | 7.0091  | 0.1115 | -0.7418 |
| 4/23/2019 0:07  | 0.7    | -0.2667 | 4.6962 | 0.25    | 0.5913 | 6.9     | 0.11   | -0.7418 |
| 4/23/2019 0:08  | 0.7    | 0.125   | 4.7185 | -0.8667 | 0.5913 | 7.2083  | 0.1039 | -0.7418 |
| 4/23/2019 0:09  | 0.725  | -0.2417 | 4.5203 | -0.7333 | 0.5913 | 7.7091  | 0.1101 | -0.7418 |
| 4/23/2019 0:10  | 0.7917 | -0.4    | 4.8455 | -0.6667 | 0.5913 | 8.0545  | 0.0961 | -0.7418 |
| 4/23/2019 0:11  | 0.8    | -0.0333 | 4.7372 | -0.15   | 0.5913 | 9.2909  | 0.1096 | -0.7418 |
| 4/23/2019 0:12  | 0.8    | 0.05    | 4.8062 | 0       | 0.5913 | 11.1583 | 0.1119 | -0.7418 |
| 4/23/2019 0:13  | 0.8    | -0.2667 | 4.772  | -0.0333 | 0.5913 | 12.87   | 0.1056 | -0.7418 |
| 4/23/2019 0:14  | 0.8    | -0.75   | 4.5393 | -0.1667 | 0.5913 | 14.3364 | 0.1085 | -0.7418 |
| 4/23/2019 0:15  | 0.7909 | 0.0917  | 4.4128 | 0.2667  | 0.5913 | 15.9    | 0.0952 | -0.7418 |
| 4/23/2019 0:16  | 0.7583 | -0.0667 | 4.4047 | 0.15    | 0.5913 | 17.5182 | 0.1125 | -0.7418 |
| 4/23/2019 0:17  | 0.775  | -0.4417 | 4.513  | -0.05   | 0.5913 | 18.2    | 0.1037 | -0.7418 |
| 4/23/2019 0:18  | 0.7833 | 0.225   | 4.4545 | -0.1833 | 0.5913 | 19.45   | 0.104  | -0.7418 |
| 4/23/2019 0:19  | 0.8    | -0.375  | 4.4305 | -0.05   | 0.5913 | 19.7182 | 0.1096 | -0.7418 |
| 4/23/2019 0:20  | 0.8    | 0.1583  | 4.5475 | -0.6333 | 0.5913 | 19.6545 | 0.0991 | -0.7418 |
| 4/23/2019 0:21  | 0.7167 | 0.2167  | 4.6207 | -0.1833 | 0.5913 | 19.1818 | 0.1103 | -0.7418 |
| 4/23/2019 0:22  | 0.7    | -0.5    | 4.4602 | 0.1     | 0.5913 | 18.7778 | 0.0945 | -0.7418 |
| 4/23/2019 0:23  | 0.7    | 0.0083  | 4.3045 | -0.1167 | 0.5913 | 17.9727 | 0.1108 | -0.7418 |
| 4/23/2019 0:24  | 0.7    | -0.0167 | 4.4377 | 0.0333  | 0.5913 | 16.1545 | 0.1049 | -0.7418 |
| 4/23/2019 0:25  | 0.7    | 0.1917  | 4.2282 | -0.0833 | 0.5913 | 14.29   | 0.1016 | -0.7418 |
| 4/23/2019 0:26  | 0.7    | -0.3833 | 4.3162 | -0.2333 | 0.5913 | 12.6182 | 0.1151 | -0.7418 |
| 4/23/2019 0:27  | 0.7    | -0.1167 | 4.3345 | -0.2833 | 0.5913 | 10.9818 | 0.0954 | -0.7418 |
| 4/23/2019 0:28  | 0.7    | -0.3083 | 4.3393 | 0.4167  | 0.5913 | 9.2455  | 0.1085 | -0.7418 |
| 4/23/2019 0:29  | 0.6167 | 0.5083  | 4.4452 | -0.1833 | 0.5913 | 7.35    | 0.1003 | -0.7418 |
| 4/23/2019 0:30  | 0.6083 | 0.6     | 4.4643 | -0.5    | 0.5913 | 5.9455  | 0.1067 | -0.7418 |
| 4/23/2019 0:31  | 0.7    | 0.2333  | 4.2998 | -0.1333 | 0.5913 | 7.0417  | 0.1096 | -0.7418 |
| 4/23/2019 0:32  | 0.7    | -0.4417 | 4.3397 | 0.2167  | 0.5913 | 7.8818  | 0.0979 | -0.7418 |
| 4/23/2019 0:33  | 0.7    | 0.4917  | 4.2562 | -0.35   | 0.5913 | 7.9333  | 0.1123 | -0.7418 |
| 4/23/2019 0:34  | 0.7    | 0.025   | 4.463  | -0.5    | 0.5913 | 8.5455  | 0.0961 | -0.7418 |
| 4/23/2019 0:35  | 0.7    | 0.6167  | 4.3494 | -0.05   | 0.5913 | 10.1167 | 0.1094 | -0.7418 |
| 4/23/2019 0:36  | 0.7    | -0.1333 | 4.5238 | -0.3167 | 0.5913 | 11      | 0.0933 | -0.7418 |
| 4/23/2019 0:37  | 0.7    | -0.3333 | 4.6588 | 0.1333  | 0.5913 | 11      | 0.1106 | -0.7418 |
| 4/23/2019 0:38  | 0.7    | -0.3583 | 4.6756 | -0.4    | 0.5913 | 11.7111 | 0.1059 | -0.7418 |



|                |        |         |        |         |        |         |        |         |
|----------------|--------|---------|--------|---------|--------|---------|--------|---------|
| 4/23/2019 0:39 | 0.7    | -0.5167 | 4.6358 | 0.0333  | 0.5913 | 13.3727 | 0.1046 | -0.7418 |
| 4/23/2019 0:40 | 0.7    | -0.2583 | 4.3192 | -0.1667 | 0.5913 | 15.2818 | 0.1118 | -0.7418 |
| 4/23/2019 0:41 | 0.7    | -0.625  | 4.3072 | -0.3833 | 0.5913 | 16.6545 | 0.0992 | -0.7418 |
| 4/23/2019 0:42 | 0.7    | 0.0083  | 4.381  | -0.1333 | 0.5913 | 16.8667 | 0.1051 | -0.7418 |
| 4/23/2019 0:43 | 0.7    | -0.2333 | 4.2741 | -0.0167 | 0.5913 | 16.5818 | 0.0995 | -0.7418 |
| 4/23/2019 0:44 | 0.7    | 0.525   | 4.1338 | 0.1667  | 0.5913 | 16.96   | 0.1175 | -0.7418 |
| 4/23/2019 0:45 | 0.7    | 0.2083  | 4.0991 | -0.0333 | 0.5913 | 18.2167 | 0.1112 | -0.7418 |
| 4/23/2019 0:46 | 0.725  | 0.875   | 4.3423 | 0.0167  | 0.5913 | 19.5667 | 0.0977 | -0.7418 |
| 4/23/2019 0:47 | 0.7    | -0.0583 | 4.4632 | -0.3    | 0.5913 | 19.9917 | 0.1157 | -0.7418 |
| 4/23/2019 0:48 | 0.6417 | -0.3333 | 4.2053 | -0.4667 | 0.5913 | 20.325  | 0.0989 | -0.7418 |
| 4/23/2019 0:49 | 0.6    | -0.075  | 4.6272 | 0.1     | 0.5913 | 21.8091 | 0.1116 | -0.7418 |
| 4/23/2019 0:50 | 0.5083 | 0.4333  | 4.3293 | 0.2333  | 0.5913 | 23.11   | 0.1075 | -0.7418 |
| 4/23/2019 0:51 | 0.5083 | 0.3     | 4.2677 | -0.4167 | 0.5913 | 23.1583 | 0.1034 | -0.7418 |
| 4/23/2019 0:52 | 0.5    | -0.0583 | 4.575  | -0.6833 | 0.5913 | 23.2    | 0.1187 | -0.7418 |
| 4/23/2019 0:53 | 0.5    | -0.6167 | 4.0328 | 0       | 0.5913 | 23.3182 | 0.0977 | -0.7418 |
| 4/23/2019 0:54 | 0.5    | -0.15   | 4.0654 | -0.9833 | 0.5913 | 24.4727 | 0.1105 | -0.7418 |
| 4/23/2019 0:55 | 0.5    | 0.075   | 4.4703 | -0.8167 | 0.5913 | 25.5182 | 0.0981 | -0.7418 |
| 4/23/2019 0:56 | 0.5    | 0.075   | 4.1958 | -0.05   | 0.5913 | 25.6167 | 0.1074 | -0.7418 |
| 4/23/2019 0:57 | 0.475  | -0.1667 | 4.3231 | -0.3833 | 0.5913 | 25.9333 | 0.1033 | -0.7418 |
| 4/23/2019 0:58 | 0.5    | -0.4583 | 4.2879 | -0.25   | 0.5913 | 25.8727 | 0.1003 | -0.7418 |
| 4/23/2019 0:59 | 0.4333 | -0.2083 | 4.1126 | 0.3     | 0.5913 | 25.8    | 0.1171 | -0.7418 |
| 4/23/2019 1:00 | 0.4833 | -0.3583 | 4.4731 | 0.0667  | 0.5913 | 25.8    | 0.095  | -0.7418 |
| 4/23/2019 1:01 | 0.4667 | -0.275  | 4.2303 | 0.1667  | 0.5913 | 25.075  | 0.1097 | -0.7418 |
| 4/23/2019 1:02 | 0.45   | -0.1333 | 4.4495 | 0.1333  | 0.5913 | 23.55   | 0.0982 | -0.7418 |
| 4/23/2019 1:03 | 0.4417 | 0.4083  | 4.3298 | -0.1333 | 0.5913 | 23.3909 | 0.1067 | -0.7418 |
| 4/23/2019 1:04 | 0.4417 | -0.1583 | 4.2185 | -0.1    | 0.5913 | 23.3909 | 0.104  | -0.7418 |
| 4/23/2019 1:05 | 0.4417 | -0.1417 | 4.225  | -0.05   | 0.5913 | 22.6545 | 0.105  | -0.7418 |
| 4/23/2019 1:06 | 0.4167 | 0.7     | 4.109  | 0.2167  | 0.5913 | 21.0333 | 0.1104 | -0.7418 |
| 4/23/2019 1:07 | 0.4    | -0.2417 | 4.4114 | -0.55   | 0.5913 | 19.375  | 0.1026 | -0.7418 |
| 4/23/2019 1:08 | 0.4    | 0.1583  | 4.4438 | 0.0833  | 0.5913 | 17.6417 | 0.1116 | -0.7418 |
| 4/23/2019 1:09 | 0.4    | -0.0833 | 4.4724 | -0.15   | 0.5913 | 16.1    | 0.099  | -0.7418 |
| 4/23/2019 1:10 | 0.3833 | 1       | 3.9964 | 0.1167  | 0.5913 | 15.6333 | 0.1084 | -0.7418 |
| 4/23/2019 1:11 | 0.4    | 0.4583  | 4.4295 | 0.3167  | 0.5913 | 15.7091 | 0.1062 | -0.7418 |
| 4/23/2019 1:12 | 0.4833 | 0.0417  | 4.0153 | -0.2333 | 0.5913 | 15.8    | 0.101  | -0.7418 |
| 4/23/2019 1:13 | 0.5    | 0.4667  | 4.2271 | 0.0167  | 0.5913 | 16.0636 | 0.1184 | -0.7418 |
| 4/23/2019 1:14 | 0.5    | 0.675   | 4.2059 | 0.3333  | 0.5913 | 17.64   | 0.0948 | -0.7418 |
| 4/23/2019 1:15 | 0.5    | 0.1083  | 4.4029 | 0.0333  | 0.5913 | 18.1636 | 0.1081 | -0.7418 |
| 4/23/2019 1:16 | 0.4167 | 0.2417  | 3.9501 | 0.1833  | 0.5913 | 17.9333 | 0.1013 | -0.7418 |
| 4/23/2019 1:17 | 0.4667 | 0.5417  | 4.1303 | -0.3833 | 0.5913 | 18.025  | 0.107  | -0.7418 |
| 4/23/2019 1:18 | 0.5    | 0.1083  | 4.208  | -0.5167 | 0.5913 | 19.4636 | 0.1131 | -0.7418 |
| 4/23/2019 1:19 | 0.5667 | 0.075   | 4.3518 | 0.2     | 0.5913 | 21.15   | 0.0992 | -0.7418 |
| 4/23/2019 1:20 | 0.6    | -0.0917 | 4.2348 | -0.5833 | 0.5913 | 22.9    | 0.1111 | -0.7418 |
| 4/23/2019 1:21 | 0.6    | 0       | 4.3083 | -0.15   | 0.5913 | 24.475  | 0.0934 | -0.7418 |
| 4/23/2019 1:22 | 0.6    | 0.475   | 4.1564 | -0.2333 | 0.5913 | 25.05   | 0.1001 | -0.7418 |
| 4/23/2019 1:23 | 0.6    | 0.425   | 4.224  | 0.2333  | 0.5913 | 24.6833 | 0.1047 | -0.7418 |
| 4/23/2019 1:24 | 0.6    | 0.025   | 4.298  | 0.2833  | 0.5913 | 24.4455 | 0.1029 | -0.7418 |
| 4/23/2019 1:25 | 0.6917 | -0.1083 | 4.3273 | -0.45   | 0.5913 | 24.6091 | 0.1112 | -0.7418 |

|                |        |         |        |         |        |         |        |         |
|----------------|--------|---------|--------|---------|--------|---------|--------|---------|
| 4/23/2019 1:26 | 0.7    | 0.4083  | 4.3283 | -0.25   | 0.5913 | 24.7546 | 0.0951 | -0.7418 |
| 4/23/2019 1:27 | 0.7    | 0.325   | 4.0891 | -0.2833 | 0.5913 | 24.6    | 0.111  | -0.7418 |
| 4/23/2019 1:28 | 0.6583 | 0.375   | 4.2156 | 0.0833  | 0.5913 | 24.46   | 0.1005 | -0.7418 |
| 4/23/2019 1:29 | 0.6    | 0.325   | 4.0818 | -0.0167 | 0.5913 | 24.2636 | 0.1051 | -0.7418 |
| 4/23/2019 1:30 | 0.6    | 0.1417  | 4.0876 | -0.0833 | 0.5913 | 24.2273 | 0.1026 | -0.7418 |
| 4/23/2019 1:31 | 0.6    | 0.1583  | 4.2219 | -0.3167 | 0.5913 | 24.2273 | 0.0979 | -0.7418 |
| 4/23/2019 1:32 | 0.6    | 0.45    | 3.9835 | -0.3833 | 0.5913 | 24.3    | 0.1182 | -0.7418 |
| 4/23/2019 1:33 | 0.6    | 0.7     | 4.4038 | -0.2333 | 0.5913 | 24.4273 | 0.1044 | -0.7418 |
| 4/23/2019 1:34 | 0.6167 | -0.125  | 4.3583 | -0.1333 | 0.5913 | 24.64   | 0.1117 | -0.7418 |
| 4/23/2019 1:35 | 0.7    | -0.125  | 4.1618 | -0.1333 | 0.5913 | 24.7818 | 0.1041 | -0.7418 |
| 4/23/2019 1:36 | 0.6167 | 1.0167  | 4.4558 | -0.3667 | 0.5913 | 24.8182 | 0.1067 | -0.7418 |
| 4/23/2019 1:37 | 0.6    | 0.4     | 4.6417 | 0.1833  | 0.5913 | 24.6182 | 0.1085 | -0.7418 |
| 4/23/2019 1:38 | 0.6    | -0.1    | 4.0407 | -0.4167 | 0.5913 | 24.4818 | 0.0979 | -0.7418 |
| 4/23/2019 1:39 | 0.6    | 0.1     | 4.3631 | 0.05    | 0.5913 | 24.2556 | 0.1158 | -0.7418 |
| 4/23/2019 1:40 | 0.5667 | -0.2917 | 4.4188 | -0.1    | 0.5913 | 24.1    | 0.0936 | -0.7418 |
| 4/23/2019 1:41 | 0.6    | -0.3917 | 4.1443 | 0.1167  | 0.5913 | 24.05   | 0.1093 | -0.7418 |
| 4/23/2019 1:42 | 0.6    | 0.375   | 4.1513 | 0.1167  | 0.5913 | 24.18   | 0.106  | -0.7418 |
| 4/23/2019 1:43 | 0.6    | 0.9167  | 4.121  | -0.1667 | 0.5913 | 24.2182 | 0.0981 | -0.7418 |
| 4/23/2019 1:44 | 0.6    | 0.3333  | 3.9125 | -0.4167 | 0.5913 | 23.7625 | 0.1118 | -0.7418 |
| 4/23/2019 1:45 | 0.6583 | 0.1417  | 4.2241 | -0.1333 | 0.5913 | 22.9455 | 0.0951 | -0.7418 |
| 4/23/2019 1:46 | 0.675  | 0.2667  | 4.2367 | -0.1833 | 0.5913 | 22.7364 | 0.1133 | -0.7418 |
| 4/23/2019 1:47 | 0.7    | 1.0083  | 4.1213 | -0.1167 | 0.5913 | 22.8417 | 0.1011 | -0.7418 |
| 4/23/2019 1:48 | 0.7    | 0.2667  | 3.9655 | -0.3167 | 0.5913 | 22.85   | 0.1063 | -0.7418 |
| 4/23/2019 1:49 | 0.7    | 0.3083  | 4.1277 | 0.35    | 0.5913 | 22.4417 | 0.1073 | -0.7418 |
| 4/23/2019 1:50 | 0.675  | 0.075   | 4.0146 | 0.15    | 0.5913 | 22.03   | 0.0949 | -0.7418 |
| 4/23/2019 1:51 | 0.7    | 0.525   | 4.1156 | -0.0833 | 0.5913 | 22.1417 | 0.1137 | -0.7418 |
| 4/23/2019 1:52 | 0.7    | 0.45    | 4.1168 | -0.2667 | 0.5913 | 22.2556 | 0.1054 | -0.7418 |
| 4/23/2019 1:53 | 0.7    | 0.3417  | 4.3384 | 0.0667  | 0.5913 | 22.2833 | 0.1147 | -0.7418 |
| 4/23/2019 1:54 | 0.7    | 0.625   | 4.1594 | -0.3    | 0.5913 | 21.71   | 0.0996 | -0.7418 |
| 4/23/2019 1:55 | 0.7    | -0.2667 | 4.3448 | 0.1     | 0.5913 | 20.875  | 0.1158 | -0.7418 |
| 4/23/2019 1:56 | 0.6833 | -0.2833 | 4.1324 | -0.5333 | 0.5913 | 20.3889 | 0.1085 | -0.7418 |
| 4/23/2019 1:57 | 0.625  | -0.1917 | 4.2303 | 0.0333  | 0.5913 | 20.975  | 0.1064 | -0.7418 |
| 4/23/2019 1:58 | 0.6    | -0.3917 | 4.1127 | 0.0167  | 0.5913 | 21      | 0.1081 | -0.7418 |
| 4/23/2019 1:59 | 0.6    | 0.2583  | 4.1752 | -0.5833 | 0.5913 | 21      | 0.0981 | -0.7418 |
| 4/23/2019 2:00 | 0.6    | 0.1583  | 4.026  | -0.4333 | 0.5913 | 21.13   | 0.1107 | -0.7418 |
| 4/23/2019 2:01 | 0.6583 | -0.4667 | 4.1778 | -0.4833 | 0.5913 | 21.525  | 0.1092 | -0.7418 |
| 4/23/2019 2:02 | 0.6    | -0.1833 | 3.8217 | -0.1    | 0.5913 | 21.5364 | 0.1054 | -0.7418 |
| 4/23/2019 2:03 | 0.6    | 0.0583  | 3.9632 | 0.0167  | 0.5913 | 20.4546 | 0.1085 | -0.7418 |
| 4/23/2019 2:04 | 0.6    | -0.0583 | 4.1868 | 0.2833  | 0.5913 | 19.2889 | 0.1015 | -0.7418 |
| 4/23/2019 2:05 | 0.6    | 0.425   | 4.1065 | -0.7167 | 0.5913 | 19.22   | 0.1127 | -0.7418 |
| 4/23/2019 2:06 | 0.6    | -0.1417 | 4.6098 | -0.4833 | 0.5913 | 19.9667 | 0.1045 | -0.7418 |
| 4/23/2019 2:07 | 0.6    | 0.05    | 4.0985 | -0.0833 | 0.5913 | 20.3636 | 0.1116 | -0.7418 |
| 4/23/2019 2:08 | 0.6    | -0.15   | 4.3122 | -0.8833 | 0.5913 | 21.05   | 0.1071 | -0.7418 |
| 4/23/2019 2:09 | 0.7    | -0.1583 | 4.3582 | -0.35   | 0.5913 | 20.5182 | 0.1033 | -0.7418 |
| 4/23/2019 2:10 | 0.7    | 0.8333  | 4.1348 | -0.1167 | 0.5913 | 20.8818 | 0.1193 | -0.7418 |
| 4/23/2019 2:11 | 0.6417 | 0.4583  | 3.8747 | 0.4167  | 0.5913 | 20.2909 | 0.1    | -0.7418 |
| 4/23/2019 2:12 | 0.6    | -0.1667 | 3.8973 | -0.0167 | 0.5913 | 18.95   | 0.1109 | -0.7418 |

|                |        |         |        |         |        |         |        |         |
|----------------|--------|---------|--------|---------|--------|---------|--------|---------|
| 4/23/2019 2:13 | 0.65   | 0.0583  | 4.3058 | 0.1333  | 0.5913 | 17.34   | 0.1032 | -0.7418 |
| 4/23/2019 2:14 | 0.7    | -0.15   | 3.9688 | 0.25    | 0.5913 | 16.525  | 0.1131 | -0.7418 |
| 4/23/2019 2:15 | 0.7    | 0.1667  | 3.7792 | -0.3167 | 0.5913 | 17.1636 | 0.1106 | -0.7418 |
| 4/23/2019 2:16 | 0.6    | -0.275  | 4.3045 | 0.3333  | 0.5913 | 18.6182 | 0.1021 | -0.7418 |
| 4/23/2019 2:17 | 0.6417 | -0.3417 | 4.14   | -0.1667 | 0.5913 | 19.1909 | 0.1136 | -0.7418 |
| 4/23/2019 2:18 | 0.7    | 0.1167  | 4.2245 | -0.8833 | 0.5913 | 19.1    | 0.0998 | -0.7418 |
| 4/23/2019 2:19 | 0.7    | -0.15   | 4.0157 | -0.4333 | 0.5913 | 19.2818 | 0.1102 | -0.7418 |
| 4/23/2019 2:20 | 0.7    | -0.7417 | 3.7137 | -0.3667 | 0.5913 | 19.6182 | 0.0989 | -0.7418 |
| 4/23/2019 2:21 | 0.7    | -0.0833 | 3.9982 | 0.4167  | 0.5913 | 19.76   | 0.1115 | -0.7418 |
| 4/23/2019 2:22 | 0.6417 | 0.0417  | 3.9818 | -0.4333 | 0.5913 | 19.5909 | 0.1022 | -0.7418 |
| 4/23/2019 2:23 | 0.6    | 0.2583  | 4.0672 | -0.2    | 0.5913 | 19.8    | 0.1043 | -0.7418 |
| 4/23/2019 2:24 | 0.6    | 0.3333  | 4.0363 | -0.35   | 0.5913 | 20.7778 | 0.1158 | -0.7418 |
| 4/23/2019 2:25 | 0.6    | -0.1    | 3.9832 | 0       | 0.5913 | 22.1417 | 0.0984 | -0.7418 |
| 4/23/2019 2:26 | 0.6    | -0.1    | 4.0895 | 0.1667  | 0.5913 | 23.7889 | 0.1114 | -0.7418 |
| 4/23/2019 2:27 | 0.6    | -0.0583 | 3.8838 | -0.0333 | 0.5913 | 24.8182 | 0.1039 | -0.7418 |
| 4/23/2019 2:28 | 0.6    | 0.1     | 3.9148 | 0.1     | 0.5913 | 24.9    | 0.1074 | -0.7418 |
| 4/23/2019 2:29 | 0.6    | 0       | 4.1318 | -0.1833 | 0.5913 | 25.02   | 0.1123 | -0.7418 |
| 4/23/2019 2:30 | 0.6    | -0.225  | 3.8098 | -0.05   | 0.5913 | 25.3    | 0.0969 | -0.7418 |
| 4/23/2019 2:31 | 0.6    | 0.15    | 3.6437 | -0.3    | 0.5913 | 25.3    | 0.1143 | -0.7418 |
| 4/23/2019 2:32 | 0.625  | 0.2     | 4.272  | -0.1333 | 0.5913 | 25.3546 | 0.0936 | -0.7418 |
| 4/23/2019 2:33 | 0.7    | -0.475  | 4.1427 | -0.95   | 0.5913 | 25.8    | 0.1086 | -0.7418 |
| 4/23/2019 2:34 | 0.6667 | -0.0583 | 3.863  | -0.5667 | 0.5913 | 26.4    | 0.1019 | -0.7418 |
| 4/23/2019 2:35 | 0.7    | -0.025  | 4.0883 | -0.2    | 0.5913 | 26.45   | 0.1062 | -0.7418 |
| 4/23/2019 2:36 | 0.7    | 0.4333  | 4.1333 | -0.0667 | 0.5913 | 26.7    | 0.1102 | -0.7418 |
| 4/23/2019 2:37 | 0.75   | -0.225  | 3.6057 | -0.2667 | 0.5913 | 27.04   | 0.0973 | -0.7418 |
| 4/23/2019 2:38 | 0.8    | -0.175  | 3.9405 | -0.5167 | 0.5913 | 26.8546 | 0.1087 | -0.7418 |
| 4/23/2019 2:39 | 0.875  | 0.3917  | 4.1062 | 0.0667  | 0.5913 | 26.6364 | 0.0966 | -0.7418 |
| 4/23/2019 2:40 | 0.9    | 0.1917  | 3.9675 | -0.5833 | 0.5913 | 26.6    | 0.1091 | -0.7418 |
| 4/23/2019 2:41 | 0.9    | 0.4     | 3.8095 | -0.7    | 0.5913 | 26.6    | 0.0967 | -0.7418 |
| 4/23/2019 2:42 | 0.9    | 0.15    | 3.8542 | -0.5667 | 0.5913 | 26.3546 | 0.0994 | -0.7418 |
| 4/23/2019 2:43 | 0.9    | -0.475  | 3.8398 | 0.0167  | 0.5913 | 26.1333 | 0.1063 | -0.7418 |
| 4/23/2019 2:44 | 0.85   | 0.4667  | 4.1377 | 0.4     | 0.5913 | 25.925  | 0.1007 | -0.7418 |
| 4/23/2019 2:45 | 0.8    | 0.3583  | 3.8995 | -0.3167 | 0.5913 | 25.7727 | 0.1116 | -0.7418 |
| 4/23/2019 2:46 | 0.8    | 0.3333  | 4.0745 | -0.4167 | 0.5913 | 25.6333 | 0.102  | -0.7418 |
| 4/23/2019 2:47 | 0.8    | 0.4667  | 4.139  | 0.0167  | 0.5913 | 25.3273 | 0.1073 | -0.7418 |
| 4/23/2019 2:48 | 0.8    | -0.0583 | 3.9653 | -0.0667 | 0.5913 | 25.0909 | 0.1061 | -0.7418 |
| 4/23/2019 2:49 | 0.8083 | 0.8417  | 4.0863 | -0.3667 | 0.5913 | 24.84   | 0.102  | -0.7418 |
| 4/23/2019 2:50 | 0.85   | -0.0417 | 4.0437 | 0.1333  | 0.5913 | 24.2364 | 0.1078 | -0.7418 |
| 4/23/2019 2:51 | 0.8083 | -0.3083 | 4.1982 | -0.4833 | 0.5913 | 23.06   | 0.0945 | -0.7418 |
| 4/23/2019 2:52 | 0.8    | -0.375  | 4.0443 | -0.4833 | 0.5913 | 21.4417 | 0.1135 | -0.7418 |
| 4/23/2019 2:53 | 0.8    | -0.3667 | 3.9247 | -0.4167 | 0.5913 | 19.6444 | 0.0988 | -0.7418 |
| 4/23/2019 2:54 | 0.7    | -0.525  | 3.664  | -0.6667 | 0.5913 | 18      | 0.1061 | -0.7418 |
| 4/23/2019 2:55 | 0.7    | 0.05    | 4.0915 | 0.05    | 0.5913 | 16.4    | 0.104  | -0.7418 |
| 4/23/2019 2:56 | 0.7    | 1.0583  | 3.7672 | 0       | 0.5913 | 14.775  | 0.0976 | -0.7418 |
| 4/23/2019 2:57 | 0.675  | 0.05    | 3.708  | -0.0833 | 0.5913 | 13.16   | 0.1089 | -0.7418 |
| 4/23/2019 2:58 | 0.6417 | 0.35    | 3.9567 | -0.45   | 0.5913 | 11.5273 | 0.1021 | -0.7418 |
| 4/23/2019 2:59 | 0.6    | 0.25    | 3.9317 | 0.0333  | 0.5913 | 10.1727 | 0.1092 | -0.7418 |

|                |        |         |        |         |        |         |        |         |
|----------------|--------|---------|--------|---------|--------|---------|--------|---------|
| 4/23/2019 3:00 | 0.65   | -0.0083 | 3.9972 | 0.0333  | 0.5913 | 9.77    | 0.1008 | -0.7418 |
| 4/23/2019 3:01 | 0.6083 | 0.3667  | 4.0953 | -0.6833 | 0.5913 | 9.8455  | 0.1086 | -0.7418 |
| 4/23/2019 3:02 | 0.6    | 0.4417  | 3.8687 | -0.7333 | 0.5913 | 10.2    | 0.1059 | -0.7418 |
| 4/23/2019 3:03 | 0.6    | 0.2     | 3.8727 | -0.2833 | 0.5913 | 11.13   | 0.099  | -0.7418 |
| 4/23/2019 3:04 | 0.6    | 0.05    | 4.2045 | -0.4833 | 0.5913 | 12.5636 | 0.1105 | -0.7418 |
| 4/23/2019 3:05 | 0.6    | -0.2417 | 4.1502 | -0.0167 | 0.5913 | 14.45   | 0.087  | -0.7418 |
| 4/23/2019 3:06 | 0.5833 | 0.35    | 3.8812 | 0.0667  | 0.5913 | 16.07   | 0.1064 | -0.7418 |
| 4/23/2019 3:07 | 0.6    | 0.4917  | 3.7748 | 0.4     | 0.5913 | 17.59   | 0.1034 | -0.7418 |
| 4/23/2019 3:08 | 0.6    | 0.0833  | 3.8802 | -0.1333 | 0.5913 | 19.08   | 0.1016 | -0.7418 |
| 4/23/2019 3:09 | 0.6    | -0.2917 | 3.9512 | -0.45   | 0.5913 | 20.8091 | 0.1081 | -0.7418 |
| 4/23/2019 3:10 | 0.6    | -0.1667 | 4.1047 | 0.0167  | 0.5913 | 22.5182 | 0.0951 | -0.7418 |
| 4/23/2019 3:11 | 0.6    | 0.225   | 3.7892 | -0.4167 | 0.5913 | 23.2818 | 0.1084 | -0.7418 |
| 4/23/2019 3:12 | 0.6    | -0.6917 | 4.0822 | -0.1333 | 0.5913 | 22.4364 | 0.0954 | -0.7418 |
| 4/23/2019 3:13 | 0.6    | -0.0583 | 3.9742 | -0.1167 | 0.5913 | 20.8727 | 0.1024 | -0.7418 |
| 4/23/2019 3:14 | 0.6    | -0.4083 | 4.0015 | -0.25   | 0.5913 | 19.14   | 0.0989 | -0.7418 |
| 4/23/2019 3:15 | 0.6    | -0.1667 | 4.1668 | 0.1833  | 0.5913 | 17.5636 | 0.0998 | -0.7418 |
| 4/23/2019 3:16 | 0.6    | -0.05   | 3.8993 | -0.2167 | 0.5913 | 16.0546 | 0.1029 | -0.7418 |
| 4/23/2019 3:17 | 0.6    | 0.5917  | 3.9165 | -0.1167 | 0.5913 | 14.2727 | 0.0947 | -0.7418 |
| 4/23/2019 3:18 | 0.5667 | 0.5417  | 3.8037 | -0.3667 | 0.5913 | 12.5083 | 0.1074 | -0.7418 |
| 4/23/2019 3:19 | 0.5    | 0.5333  | 4.1508 | -0.4667 | 0.5913 | 10.9667 | 0.0978 | -0.7418 |
| 4/23/2019 3:20 | 0.525  | 0.0333  | 3.7148 | -0.55   | 0.5913 | 9.65    | 0.0983 | -0.7418 |
| 4/23/2019 3:21 | 0.5667 | 0.1417  | 4.2148 | -0.2333 | 0.5913 | 7.9909  | 0.0995 | -0.7418 |
| 4/23/2019 3:22 | 0.5417 | 0.1     | 4.0238 | -0.0667 | 0.5913 | 6.2182  | 0.0945 | -0.7418 |
| 4/23/2019 3:23 | 0.5583 | -0.0333 | 3.5442 | -0.4    | 0.5913 | 5.1818  | 0.103  | -0.7418 |
| 4/23/2019 3:24 | 0.575  | 0.4083  | 3.749  | -0.4333 | 0.5913 | 5.2     | 0.0936 | -0.7418 |
| 4/23/2019 3:25 | 0.6    | -0.275  | 3.8483 | 0.3833  | 0.5913 | 5.2     | 0.1084 | -0.7418 |
| 4/23/2019 3:26 | 0.6    | -0.3833 | 3.9262 | -0.2833 | 0.5913 | 5.2667  | 0.0974 | -0.7418 |
| 4/23/2019 3:27 | 0.5833 | 0.075   | 3.776  | -0.1667 | 0.5913 | 5.3     | 0.0987 | -0.7418 |
| 4/23/2019 3:28 | 0.5    | -0.45   | 3.8495 | -0.2667 | 0.5913 | 5.5364  | 0.1065 | -0.7418 |
| 4/23/2019 3:29 | 0.5083 | 0.0583  | 3.9243 | -0.1667 | 0.5913 | 6.2091  | 0.0957 | -0.7418 |
| 4/23/2019 3:30 | 0.5    | -0.1333 | 3.8767 | 0.1333  | 0.5913 | 7.64    | 0.1057 | -0.7418 |
| 4/23/2019 3:31 | 0.5    | 0.2083  | 3.9655 | 0.2667  | 0.5913 | 8.5636  | 0.0935 | -0.7418 |
| 4/23/2019 3:32 | 0.5    | -0.8    | 3.94   | -0.1    | 0.5913 | 8.6     | 0.1048 | -0.7418 |
| 4/23/2019 3:33 | 0.5    | -0.5167 | 3.6755 | -0.3    | 0.5913 | 8.6     | 0.0972 | -0.7418 |
| 4/23/2019 3:34 | 0.5    | -0.3417 | 3.5773 | -0.3    | 0.5913 | 8.6     | 0.0998 | -0.7418 |
| 4/23/2019 3:35 | 0.5    | 0.7417  | 3.7633 | -0.4167 | 0.5913 | 8.5556  | 0.1088 | -0.7418 |
| 4/23/2019 3:36 | 0.5    | 0.2     | 3.7483 | -0.0167 | 0.5913 | 8.2333  | 0.0898 | -0.7418 |
| 4/23/2019 3:37 | 0.4917 | -0.025  | 3.97   | -0.5333 | 0.5913 | 8.3     | 0.1062 | -0.7418 |
| 4/23/2019 3:38 | 0.5    | -0.1167 | 3.8383 | 0.0167  | 0.5913 | 8.3833  | 0.093  | -0.7418 |
| 4/23/2019 3:39 | 0.5    | -0.0833 | 3.6366 | -0.1167 | 0.5913 | 9.6     | 0.0951 | -0.7418 |
| 4/23/2019 3:40 | 0.575  | -0.0333 | 3.8963 | -0.2167 | 0.5913 | 10.8091 | 0.1053 | -0.7418 |
| 4/23/2019 3:41 | 0.6    | -0.3583 | 3.6364 | -0.3    | 0.5913 | 10.7    | 0.092  | -0.7418 |
| 4/23/2019 3:42 | 0.6    | -0.0167 | 3.713  | 0.1167  | 0.5913 | 9.9909  | 0.1078 | -0.7418 |
| 4/23/2019 3:43 | 0.6    | 0.375   | 3.921  | 0.2333  | 0.5913 | 10.51   | 0.0992 | -0.7418 |
| 4/23/2019 3:44 | 0.6    | 0.2917  | 3.7448 | -0.5    | 0.5913 | 11.95   | 0.1103 | -0.7418 |
| 4/23/2019 3:45 | 0.5417 | 0.1667  | 3.8882 | -0.2833 | 0.5913 | 13.65   | 0.1009 | -0.7418 |
| 4/23/2019 3:46 | 0.5333 | 0.6083  | 3.693  | -0.5333 | 0.5913 | 14.975  | 0.0972 | -0.7418 |

|                |        |         |        |         |        |         |        |         |
|----------------|--------|---------|--------|---------|--------|---------|--------|---------|
| 4/23/2019 3:47 | 0.5917 | -0.2667 | 3.5944 | -0.35   | 0.5913 | 15.2    | 0.1035 | -0.7418 |
| 4/23/2019 3:48 | 0.5083 | -0.4083 | 3.5999 | -0.4667 | 0.5913 | 15.2    | 0.0947 | -0.7418 |
| 4/23/2019 3:49 | 0.5    | -0.0417 | 3.5803 | -0.55   | 0.5913 | 15.2    | 0.1022 | -0.7418 |
| 4/23/2019 3:50 | 0.5    | 0.7833  | 3.6893 | -0.4    | 0.5913 | 15.1818 | 0.091  | -0.7418 |
| 4/23/2019 3:51 | 0.5833 | 0.1     | 3.8209 | 0.35    | 0.5913 | 14.2273 | 0.0976 | -0.7418 |
| 4/23/2019 3:52 | 0.6583 | -0.525  | 3.7583 | 0.25    | 0.5913 | 12.6818 | 0.1003 | -0.7418 |
| 4/23/2019 3:53 | 0.7    | 0.5     | 3.9271 | -0.2    | 0.5913 | 12.15   | 0.0942 | -0.7418 |
| 4/23/2019 3:54 | 0.7    | 0.1667  | 4.115  | 0.5833  | 0.5913 | 11.7909 | 0.1071 | -0.7418 |
| 4/23/2019 3:55 | 0.7    | -0.35   | 3.6973 | -0.3667 | 0.5913 | 10.2083 | 0.0968 | -0.7418 |
| 4/23/2019 3:56 | 0.7    | -0.1167 | 3.5844 | -0.1    | 0.5913 | 8.5556  | 0.108  | -0.7418 |
| 4/23/2019 3:57 | 0.7    | 0.8583  | 4.0289 | 0.1667  | 0.5913 | 6.8909  | 0.0949 | -0.7418 |
| 4/23/2019 3:58 | 0.7    | -0.5917 | 3.9793 | -0.0667 | 0.5913 | 5.3636  | 0.1016 | -0.7418 |
| 4/23/2019 3:59 | 0.7    | -0.1417 | 3.8496 | -0.05   | 0.5913 | 4.9     | 0.1041 | -0.7418 |
| 4/23/2019 4:00 | 0.7    | 0.2     | 3.7988 | 0.0167  | 0.5913 | 4.9     | 0.094  | -0.7418 |
| 4/23/2019 4:01 | 0.7    | 0.025   | 3.8983 | -0.2167 | 0.5913 | 5.08    | 0.109  | -0.7418 |
| 4/23/2019 4:02 | 0.7    | 0.45    | 3.8706 | -0.25   | 0.5913 | 5.3     | 0.0883 | -0.7418 |
| 4/23/2019 4:03 | 0.65   | -0.2583 | 3.7216 | -0.3    | 0.5913 | 5.35    | 0.1009 | -0.7418 |
| 4/23/2019 4:04 | 0.7    | 0.0333  | 3.9268 | -0.2167 | 0.5913 | 5.4     | 0.1036 | -0.7418 |
| 4/23/2019 4:05 | 0.7083 | -0.2417 | 3.5624 | -0.3333 | 0.5913 | 5.4     | 0.0942 | -0.7418 |
| 4/23/2019 4:06 | 0.7417 | 0.0833  | 3.7267 | -0.2167 | 0.5913 | 5.4     | 0.1053 | -0.7418 |
| 4/23/2019 4:07 | 0.7    | -0.05   | 3.6705 | -0.5    | 0.5913 | 5.4     | 0.0863 | -0.7418 |
| 4/23/2019 4:08 | 0.7    | -0.1417 | 3.7283 | -0.4667 | 0.5913 | 5.4273  | 0.1061 | -0.7418 |
| 4/23/2019 4:09 | 0.7    | 0.45    | 3.7788 | 0.0167  | 0.5913 | 5.8417  | 0.1    | -0.7418 |
| 4/23/2019 4:10 | 0.6167 | 0.3333  | 3.6648 | -0.2833 | 0.5913 | 6       | 0.1031 | -0.7418 |
| 4/23/2019 4:11 | 0.6    | 0.125   | 3.6464 | 0.0167  | 0.5913 | 6.1583  | 0.0995 | -0.7418 |
| 4/23/2019 4:12 | 0.6    | 0.0583  | 3.7814 | 0.0333  | 0.5913 | 6.2727  | 0.0903 | -0.7418 |
| 4/23/2019 4:13 | 0.6    | -0.4833 | 3.8191 | -0.2833 | 0.5913 | 7.3636  | 0.1075 | -0.7418 |
| 4/23/2019 4:14 | 0.6    | 0.125   | 3.7605 | -0.2333 | 0.5913 | 8.5333  | 0.0919 | -0.7418 |
| 4/23/2019 4:15 | 0.5167 | 0.0083  | 3.812  | -0.0833 | 0.5913 | 8.9727  | 0.0993 | -0.7418 |
| 4/23/2019 4:16 | 0.5    | 0.525   | 3.7472 | -0.3833 | 0.5913 | 8.9     | 0.0961 | -0.7418 |
| 4/23/2019 4:17 | 0.5    | 0.1     | 3.7414 | -0.0833 | 0.5913 | 8.9     | 0.0972 | -0.7418 |
| 4/23/2019 4:18 | 0.525  | 0.0667  | 3.513  | -0.0833 | 0.5913 | 8.9     | 0.1014 | -0.7418 |
| 4/23/2019 4:19 | 0.6    | -0.375  | 3.6044 | -0.3    | 0.5913 | 8.9     | 0.0866 | -0.7418 |
| 4/23/2019 4:20 | 0.6    | 0.0417  | 3.5202 | 0.5     | 0.5913 | 8.9     | 0.107  | -0.7418 |
| 4/23/2019 4:21 | 0.6    | -0.125  | 3.824  | -0.3    | 0.5913 | 8.6111  | 0.1001 | -0.7418 |
| 4/23/2019 4:22 | 0.6    | 0.375   | 3.7813 | 0       | 0.5913 | 8.3273  | 0.1057 | -0.7418 |
| 4/23/2019 4:23 | 0.6    | -0.025  | 3.69   | 0.0833  | 0.5913 | 8.19    | 0.1024 | -0.7418 |
| 4/23/2019 4:24 | 0.6    | 0.1167  | 4.0746 | 0.65    | 0.5913 | 8       | 0.0898 | -0.7418 |
| 4/23/2019 4:25 | 0.6    | -0.3583 | 3.7398 | -0.3167 | 0.5913 | 7.4778  | 0.107  | -0.7418 |
| 4/23/2019 4:26 | 0.6    | -0.4167 | 3.6053 | 0.45    | 0.5913 | 6.9     | 0.0912 | -0.7418 |
| 4/23/2019 4:27 | 0.6    | -0.4083 | 3.7669 | 0.5833  | 0.5913 | 7.1636  | 0.1068 | -0.7418 |
| 4/23/2019 4:28 | 0.6    | 0.1     | 3.7214 | 0.5     | 0.5913 | 8.7     | 0.0934 | -0.7418 |
| 4/23/2019 4:29 | 0.6    | 0.1417  | 3.5968 | 0.0833  | 0.5913 | 10.28   | 0.104  | -0.7418 |
| 4/23/2019 4:30 | 0.6    | 0.1833  | 3.9128 | -0.0667 | 0.5913 | 11.82   | 0.0977 | -0.7418 |
| 4/23/2019 4:31 | 0.6    | 0.45    | 3.7382 | -0.3    | 0.5913 | 13.2417 | 0.089  | -0.7418 |
| 4/23/2019 4:32 | 0.6    | 0.2     | 3.8823 | -0.6333 | 0.5913 | 14.14   | 0.0998 | -0.7418 |
| 4/23/2019 4:33 | 0.6    | -0.0917 | 3.8411 | -0.2333 | 0.5913 | 15.7182 | 0.0911 | -0.7418 |

|                |        |         |        |         |        |         |        |         |
|----------------|--------|---------|--------|---------|--------|---------|--------|---------|
| 4/23/2019 4:34 | 0.6    | 0.275   | 3.7234 | -0.2    | 0.5913 | 16.8636 | 0.107  | -0.7418 |
| 4/23/2019 4:35 | 0.6    | -0.1167 | 3.7602 | -0.3333 | 0.5913 | 18.4818 | 0.0907 | -0.7418 |
| 4/23/2019 4:36 | 0.6    | -0.3    | 3.8791 | -0.0833 | 0.5913 | 19.8636 | 0.0982 | -0.7418 |
| 4/23/2019 4:37 | 0.6    | 0.2917  | 3.7903 | -0.5167 | 0.5913 | 21.2091 | 0.0983 | -0.7418 |
| 4/23/2019 4:38 | 0.6    | 0.1583  | 3.8528 | -0.2333 | 0.5913 | 21.19   | 0.0927 | -0.7418 |
| 4/23/2019 4:39 | 0.6    | 0.5417  | 3.7645 | 0.3     | 0.5913 | 21.3091 | 0.103  | -0.7418 |
| 4/23/2019 4:40 | 0.6    | -0.1333 | 3.7017 | -0.1833 | 0.5913 | 19.89   | 0.0909 | -0.7418 |
| 4/23/2019 4:41 | 0.6    | 0.0583  | 3.6467 | 0.6667  | 0.5913 | 18.2636 | 0.1023 | -0.7418 |
| 4/23/2019 4:42 | 0.6    | 0.4667  | 3.5599 | 0.0833  | 0.5913 | 16.75   | 0.0964 | -0.7418 |
| 4/23/2019 4:43 | 0.65   | -0.3417 | 3.4703 | 0.3167  | 0.5913 | 15.2    | 0.1007 | -0.7418 |
| 4/23/2019 4:44 | 0.7    | -0.4417 | 3.4627 | 0.1833  | 0.5913 | 14.1333 | 0.1045 | -0.7418 |
| 4/23/2019 4:45 | 0.7    | 0.4833  | 3.6237 | 0.4167  | 0.5913 | 12.66   | 0.093  | -0.7418 |
| 4/23/2019 4:46 | 0.7    | 0.1     | 3.9358 | 0.2667  | 0.5913 | 11.59   | 0.1083 | -0.7418 |
| 4/23/2019 4:47 | 0.7    | -0.1417 | 3.7977 | -0.0167 | 0.5913 | 10      | 0.0913 | -0.7418 |
| 4/23/2019 4:48 | 0.7    | 0.1417  | 4.1033 | 0.3     | 0.5913 | 8.53    | 0.0962 | -0.7418 |
| 4/23/2019 4:49 | 0.7    | 0.3417  | 3.9733 | 0.2167  | 0.5913 | 7.3909  | 0.0983 | -0.7418 |
| 4/23/2019 4:50 | 0.7    | -0.0167 | 3.9174 | 0.0667  | 0.5913 | 7.8     | 0.0909 | -0.7418 |
| 4/23/2019 4:51 | 0.7    | 0.2083  | 3.82   | 0.1833  | 0.5913 | 8.1545  | 0.1014 | -0.7418 |
| 4/23/2019 4:52 | 0.6917 | -0.1167 | 3.7103 | -0.25   | 0.5913 | 9.5091  | 0.0878 | -0.7418 |
| 4/23/2019 4:53 | 0.7    | -0.5417 | 3.6758 | 0.0333  | 0.5913 | 10.8    | 0.1011 | -0.7418 |
| 4/23/2019 4:54 | 0.7    | 0.3     | 4.0035 | 0.3333  | 0.5913 | 11.1    | 0.0917 | -0.7418 |
| 4/23/2019 4:55 | 0.7    | 0.0333  | 3.5747 | 0.1833  | 0.5913 | 11.1    | 0.1034 | -0.7418 |
| 4/23/2019 4:56 | 0.6636 | 0.075   | 3.7503 | -0.1667 | 0.5913 | 11.11   | 0.0981 | -0.7418 |
| 4/23/2019 4:57 | 0.7    | -0.6    | 3.6801 | -0.05   | 0.5913 | 11.2    | 0.0923 | -0.7418 |
| 4/23/2019 4:58 | 0.6083 | -0.0167 | 3.7801 | 0.0167  | 0.5913 | 11.2    | 0.1014 | -0.7418 |
| 4/23/2019 4:59 | 0.6    | 0.1     | 3.8562 | -0.6167 | 0.5913 | 11.2    | 0.0829 | -0.7418 |
| 4/23/2019 5:00 | 0.525  | 0.225   | 3.6804 | 0.2667  | 0.5913 | 11.2    | 0.0968 | -0.7418 |
| 4/23/2019 5:01 | 0.5    | 0.675   | 3.737  | -0.1167 | 0.5913 | 11.1455 | 0.0906 | -0.7418 |
| 4/23/2019 5:02 | 0.5    | 0.1333  | 3.559  | 0.4167  | 0.5913 | 9.86    | 0.0927 | -0.7418 |
| 4/23/2019 5:03 | 0.5    | 0.4     | 3.7238 | 0.2667  | 0.5913 | 9.4     | 0.1004 | -0.7418 |
| 4/23/2019 5:04 | 0.5    | 0.2583  | 3.6353 | -0.6167 | 0.5913 | 9.49    | 0.0856 | -0.7418 |
| 4/23/2019 5:05 | 0.5    | 0.0667  | 3.6557 | -0.0833 | 0.5913 | 9.7455  | 0.0974 | -0.7418 |
| 4/23/2019 5:06 | 0.5    | -0.45   | 3.6875 | -0.6    | 0.5913 | 10.7333 | 0.0823 | -0.7418 |
| 4/23/2019 5:07 | 0.5    | 0.025   | 3.8772 | 0.1833  | 0.5913 | 12.3091 | 0.094  | -0.7418 |
| 4/23/2019 5:08 | 0.5    | -0.2667 | 3.815  | 0.3333  | 0.5913 | 13.87   | 0.0892 | -0.7418 |
| 4/23/2019 5:09 | 0.5    | 0.4833  | 3.7087 | -0.0333 | 0.5913 | 15.525  | 0.0879 | -0.7418 |
| 4/23/2019 5:10 | 0.5    | 0.8667  | 3.3932 | -0.3167 | 0.5913 | 17.3    | 0.0871 | -0.7418 |
| 4/23/2019 5:11 | 0.5    | 0.0833  | 3.815  | -0.0333 | 0.5913 | 19.0167 | 0.0733 | -0.7418 |
| 4/23/2019 5:12 | 0.5    | -0.2917 | 3.4863 | 0.4167  | 0.5913 | 20.8    | 0.0909 | -0.7418 |
| 4/23/2019 5:13 | 0.5    | 0.2417  | 3.8155 | -0.1    | 0.5913 | 22.3167 | 0.0875 | -0.7418 |
| 4/23/2019 5:14 | 0.5    | 0.5417  | 3.9512 | -0.15   | 0.5913 | 23.27   | 0.0759 | -0.7418 |
| 4/23/2019 5:15 | 0.5333 | 0.1583  | 3.6687 | 0.4333  | 0.5913 | 24.2091 | 0.0909 | -0.7418 |
| 4/23/2019 5:16 | 0.6    | 0.025   | 3.7028 | -0.2333 | 0.5913 | 24.3    | 0.0749 | -0.7418 |
| 4/23/2019 5:17 | 0.6    | 0.275   | 3.4205 | 0.2167  | 0.5913 | 24.34   | 0.0895 | -0.7418 |
| 4/23/2019 5:18 | 0.6    | -0.0083 | 3.6083 | 0.0833  | 0.5913 | 24.32   | 0.0782 | -0.7418 |
| 4/23/2019 5:19 | 0.6    | 0.1333  | 3.9195 | -0.0833 | 0.5913 | 23.2    | 0.0778 | -0.7418 |
| 4/23/2019 5:20 | 0.6    | -0.2083 | 3.5707 | 0.0667  | 0.5913 | 21.9    | 0.0899 | -0.7418 |

|                |        |         |        |         |        |         |        |         |
|----------------|--------|---------|--------|---------|--------|---------|--------|---------|
| 4/23/2019 5:21 | 0.6083 | 0.5083  | 3.6275 | 0.0667  | 0.5913 | 21.3727 | 0.0711 | -0.7418 |
| 4/23/2019 5:22 | 0.675  | 0.475   | 3.949  | -0.4333 | 0.5913 | 20.3909 | 0.0893 | -0.7418 |
| 4/23/2019 5:23 | 0.7    | 0.55    | 3.7808 | -0.35   | 0.5913 | 18.8546 | 0.0776 | -0.7418 |
| 4/23/2019 5:24 | 0.7    | 0.425   | 3.9812 | -0.4333 | 0.5913 | 17.25   | 0.0788 | -0.7418 |
| 4/23/2019 5:25 | 0.7417 | 0.05    | 3.7547 | -0.0167 | 0.5913 | 15.48   | 0.0889 | -0.7418 |
| 4/23/2019 5:26 | 0.8    | 0.0333  | 3.671  | -0.0667 | 0.5913 | 14.3889 | 0.0712 | -0.7418 |
| 4/23/2019 5:27 | 0.8    | 0.45    | 3.7498 | -0.0667 | 0.5913 | 13.0909 | 0.0888 | -0.7418 |
| 4/23/2019 5:28 | 0.8    | 0.6583  | 3.753  | 0.0167  | 0.5913 | 11.25   | 0.0793 | -0.7418 |
| 4/23/2019 5:29 | 0.8    | 0.3167  | 3.6932 | -0.5333 | 0.5913 | 9.5364  | 0.0895 | -0.7418 |
| 4/23/2019 5:30 | 0.7667 | 0.0083  | 3.6632 | 0.3167  | 0.5913 | 7.69    | 0.0852 | -0.7418 |
| 4/23/2019 5:31 | 0.7    | -0.275  | 3.6717 | -0.25   | 0.5913 | 7.0727  | 0.0718 | -0.7418 |
| 4/23/2019 5:32 | 0.7    | 0.0333  | 3.775  | 0.1     | 0.5913 | 6.87    | 0.089  | -0.7418 |
| 4/23/2019 5:33 | 0.7    | 0.025   | 3.6747 | 0       | 0.5913 | 6.02    | 0.0767 | -0.7418 |
| 4/23/2019 5:34 | 0.7167 | -0.2333 | 3.8923 | 0.1667  | 0.5913 | 5.0727  | 0.0768 | -0.7418 |
| 4/23/2019 5:35 | 0.775  | 0.725   | 3.9882 | -0.1333 | 0.5913 | 4.8     | 0.0874 | -0.7418 |
| 4/23/2019 5:36 | 0.7083 | 0       | 3.779  | 0       | 0.5913 | 4.8     | 0.0698 | -0.7418 |
| 4/23/2019 5:37 | 0.7    | -0.0917 | 3.4957 | 0.0167  | 0.5913 | 4.7818  | 0.0837 | -0.7418 |
| 4/23/2019 5:38 | 0.7    | 0.4833  | 3.6137 | 0.2667  | 0.5913 | 4.7     | 0.0753 | -0.7418 |
| 4/23/2019 5:39 | 0.7    | 0.2583  | 4.0543 | 0.4833  | 0.5913 | 4.7     | 0.0756 | -0.7418 |
| 4/23/2019 5:40 | 0.7    | 0.075   | 3.487  | 0.2167  | 0.5913 | 4.75    | 0.0785 | -0.7418 |
| 4/23/2019 5:41 | 0.7083 | 0.2667  | 3.8128 | 0.2     | 0.5913 | 4.8     | 0.0664 | -0.7418 |
| 4/23/2019 5:42 | 0.7583 | 0.625   | 3.7473 | -0.35   | 0.5913 | 4.8     | 0.0827 | -0.7418 |
| 4/23/2019 5:43 | 0.7    | -0.1833 | 3.5912 | 0.1833  | 0.5913 | 4.8     | 0.083  | -0.7418 |
| 4/23/2019 5:44 | 0.7    | 0.5083  | 4.034  | 0.1167  | 0.5913 | 4.8     | 0.0777 | -0.7418 |
| 4/23/2019 5:45 | 0.7167 | 0.4083  | 3.643  | -0.1167 | 0.5913 | 4.8     | 0.0728 | -0.7418 |
| 4/23/2019 5:46 | 0.8    | -0.0083 | 3.3842 | 0.4167  | 0.5913 | 4.76    | 0.071  | -0.7418 |
| 4/23/2019 5:47 | 0.8    | 0.525   | 3.8205 | 0.2667  | 0.5913 | 4.8     | 0.0754 | -0.7418 |
| 4/23/2019 5:48 | 0.8    | 0.7833  | 3.7535 | 0.2     | 0.5913 | 4.8     | 0.0811 | -0.7418 |
| 4/23/2019 5:49 | 0.775  | -0.0083 | 3.8587 | -0.1333 | 0.5913 | 4.7545  | 0.066  | -0.7418 |
| 4/23/2019 5:50 | 0.7    | 0.1833  | 3.7527 | 0.3     | 0.5913 | 4.7     | 0.0768 | -0.7418 |
| 4/23/2019 5:51 | 0.7    | 0       | 3.8448 | 0.1     | 0.5913 | 4.7     | 0.0676 | -0.7418 |
| 4/23/2019 5:52 | 0.7    | 0.4583  | 4.1212 | 0       | 0.5913 | 4.7     | 0.0782 | -0.7418 |
| 4/23/2019 5:53 | 0.7    | -0.325  | 3.7523 | 0.5     | 0.5913 | 4.6455  | 0.086  | -0.7418 |
| 4/23/2019 5:54 | 0.7583 | 0.7     | 3.8907 | 0.0167  | 0.5913 | 4.6091  | 0.0727 | -0.7418 |
| 4/23/2019 5:55 | 0.7583 | 0.4333  | 3.9287 | 0.1167  | 0.5913 | 4.7     | 0.1014 | -0.7418 |
| 4/23/2019 5:56 | 0.7    | -0.0333 | 3.6015 | 0.5833  | 0.5913 | 4.9091  | 0.0763 | -0.7418 |
| 4/23/2019 5:57 | 0.7    | 0.5833  | 4.0485 | 0.5167  | 0.5913 | 5.2273  | 0.0931 | -0.7418 |
| 4/23/2019 5:58 | 0.7    | 0.1     | 3.5933 | 0.2     | 0.5913 | 5.3     | 0.0918 | -0.7418 |
| 4/23/2019 5:59 | 0.7    | -0.2417 | 3.7418 | 0.7833  | 0.5913 | 5.3     | 0.0739 | -0.7418 |
| 4/23/2019 6:00 | 0.6833 | 0.225   | 3.8242 | -0.15   | 0.5913 | 5.2545  | 0.09   | -0.7418 |
| 4/23/2019 6:01 | 0.6167 | 0.4417  | 4.5902 | 0.6167  | 0.5913 | 5.2     | 0.0799 | -0.7418 |
| 4/23/2019 6:02 | 0.6917 | -0.45   | 3.2858 | 0.3167  | 0.5913 | 5.2818  | 0.0946 | -0.7418 |
| 4/23/2019 6:03 | 0.6    | -0.05   | 3.4027 | 0.3833  | 0.5913 | 5.3     | 0.0822 | -0.7418 |
| 4/23/2019 6:04 | 0.6    | 0.0917  | 3.2868 | -0.1667 | 0.5913 | 5.3     | 0.0768 | -0.7418 |
| 4/23/2019 6:05 | 0.6    | -0.2667 | 3.2467 | -0.4    | 0.5913 | 5.22    | 0.092  | -0.7418 |
| 4/23/2019 6:06 | 0.6167 | -0.325  | 3.4362 | -0.1167 | 0.5913 | 5.3     | 0.0817 | -0.7418 |
| 4/23/2019 6:07 | 0.6417 | 0.5833  | 3.511  | -0.55   | 0.5913 | 5.25    | 0.0744 | -0.7418 |

|                |        |         |        |         |        |        |        |         |
|----------------|--------|---------|--------|---------|--------|--------|--------|---------|
| 4/23/2019 6:08 | 0.675  | -0.1833 | 4.1157 | -0.1667 | 0.5913 | 5.1111 | 0.0939 | -0.7418 |
| 4/23/2019 6:09 | 0.6    | -0.25   | 3.4183 | -0.0167 | 0.5913 | 4.67   | 0.081  | -0.7418 |
| 4/23/2019 6:10 | 0.5333 | -0.625  | 3.7748 | 0.15    | 0.5913 | 4.6    | 0.0891 | -0.7418 |
| 4/23/2019 6:11 | 0.55   | -0.975  | 3.4462 | -0.8167 | 0.5913 | 4.6    | 0.0838 | -0.7418 |
| 4/23/2019 6:12 | 0.5833 | -0.0583 | 3.644  | -0.3167 | 0.5913 | 4.6    | 0.0753 | -0.7418 |
| 4/23/2019 6:13 | 0.6    | -0.1083 | 3.4073 | -0.1333 | 0.5913 | 4.6    | 0.0872 | -0.7418 |
| 4/23/2019 6:14 | 0.6167 | 0.2667  | 3.3657 | -0.5167 | 0.5913 | 4.6    | 0.0839 | -0.7418 |
| 4/23/2019 6:15 | 0.6083 | 0.0417  | 3.464  | -0.3    | 0.5913 | 4.6    | 0.0848 | -0.7418 |
| 4/23/2019 6:16 | 0.6    | 0.0083  | 3.6105 | -0.8167 | 0.5913 | 4.6    | 0.0932 | -0.7418 |
| 4/23/2019 6:17 | 0.6    | -0.3667 | 3.4228 | -0.3667 | 0.5913 | 4.6    | 0.0843 | -0.7418 |
| 4/23/2019 6:18 | 0.6    | -0.5417 | 3.6242 | -0.35   | 0.5913 | 4.6    | 0.1028 | -0.7418 |
| 4/23/2019 6:19 | 0.6    | -0.7917 | 3.2042 | -0.2333 | 0.5913 | 4.6    | 0.0873 | -0.7418 |
| 4/23/2019 6:20 | 0.6    | -0.6    | 3.3843 | 0.1833  | 0.5913 | 4.6    | 0.0873 | -0.7418 |
| 4/23/2019 6:21 | 0.6    | -0.9583 | 3.5363 | 0.3833  | 0.5913 | 4.6    | 0.0946 | -0.7418 |
| 4/23/2019 6:22 | 0.5667 | -0.0917 | 2.9957 | -0.6    | 0.5913 | 4.6    | 0.0762 | -0.7418 |
| 4/23/2019 6:23 | 0.5417 | 0.125   | 3.24   | -0.4667 | 0.5913 | 4.6    | 0.1042 | -0.7418 |
| 4/23/2019 6:24 | 0.6    | -0.2917 | 3.6323 | -0.1167 | 0.5913 | 4.6    | 0.0998 | -0.7418 |
| 4/23/2019 6:25 | 0.6    | -0.325  | 3.5873 | -0.2167 | 0.5913 | 4.6    | 0.087  | -0.7418 |
| 4/23/2019 6:26 | 0.6583 | -0.0083 | 3.5783 | -0.6333 | 0.5913 | 4.6    | 0.1067 | -0.7418 |
| 4/23/2019 6:27 | 0.6333 | -0.0917 | 3.7192 | -0.8167 | 0.5913 | 4.6    | 0.0857 | -0.7418 |
| 4/23/2019 6:28 | 0.7167 | 0.275   | 3.6672 | -0.3333 | 0.5913 | 4.6    | 0.0988 | -0.7418 |
| 4/23/2019 6:29 | 0.7417 | -0.5167 | 3.4108 | 0.0333  | 0.5913 | 4.6    | 0.102  | -0.7418 |
| 4/23/2019 6:30 | 0.7083 | 0       | 3.3862 | -0.35   | 0.5913 | 4.6    | 0.0953 | -0.7418 |
| 4/23/2019 6:31 | 0.7083 | -0.3417 | 3.4537 | -0.15   | 0.5913 | 4.6    | 0.1038 | -0.7418 |
| 4/23/2019 6:32 | 0.75   | -0.5417 | 3.3153 | -0.05   | 0.5913 | 4.6    | 0.092  | -0.7418 |
| 4/23/2019 6:33 | 0.775  | -0.2    | 3.5289 | -0.4333 | 0.5913 | 4.6    | 0.0989 | -0.7418 |
| 4/23/2019 6:34 | 0.8    | -0.25   | 3.275  | -0.35   | 0.5913 | 4.6    | 0.1008 | -0.7418 |
| 4/23/2019 6:35 | 0.8    | -0.4083 | 3.5146 | -0.4167 | 0.5913 | 4.69   | 0.0877 | -0.7418 |
| 4/23/2019 6:36 | 0.8083 | -0.8333 | 3.807  | -0.45   | 0.5913 | 4.7    | 0.097  | -0.7418 |
| 4/23/2019 6:37 | 0.8    | -0.9    | 3.4649 | -0.9833 | 0.5913 | 4.7    | 0.0916 | -0.7418 |
| 4/23/2019 6:38 | 0.8    | -0.1667 | 3.6642 | -0.7    | 0.5913 | 4.7    | 0.0928 | -0.7418 |
| 4/23/2019 6:39 | 0.8    | -1.1083 | 3.3889 | -0.0833 | 0.5913 | 4.7    | 0.1147 | -0.7418 |
| 4/23/2019 6:40 | 0.8    | -0.175  | 3.4907 | 0.2833  | 0.5913 | 4.73   | 0.1073 | -0.7418 |
| 4/23/2019 6:41 | 0.8    | -0.0083 | 3.1433 | -0.4333 | 0.5913 | 4.8    | 0.1167 | -0.7418 |
| 4/23/2019 6:42 | 0.8    | -0.0917 | 3.2856 | -0.4333 | 0.5913 | 4.8    | 0.112  | -0.7418 |
| 4/23/2019 6:43 | 0.8    | -0.7167 | 3.4128 | -0.2333 | 0.5913 | 4.8    | 0.0996 | -0.7418 |
| 4/23/2019 6:44 | 0.7917 | -0.2917 | 3.273  | -0.3    | 0.5913 | 4.8    | 0.1134 | -0.7418 |
| 4/23/2019 6:45 | 0.7167 | -0.9083 | 3.3862 | -0.3    | 0.5913 | 4.8    | 0.0983 | -0.7418 |
| 4/23/2019 6:46 | 0.7    | -0.7    | 3.5129 | -0.3833 | 0.5913 | 4.8    | 0.0976 | -0.7418 |
| 4/23/2019 6:47 | 0.7    | -0.5167 | 3.5196 | -0.95   | 0.5913 | 4.8    | 0.11   | -0.7418 |
| 4/23/2019 6:48 | 0.7167 | -0.15   | 3.6646 | -0.4333 | 0.5913 | 4.8    | 0.093  | -0.7418 |
| 4/23/2019 6:49 | 0.7167 | -1.1    | 3.1042 | 0.1     | 0.5913 | 4.8    | 0.1145 | -0.7418 |
| 4/23/2019 6:50 | 0.7    | -0.4    | 3.3315 | -0.55   | 0.5913 | 4.8    | 0.1018 | -0.7418 |
| 4/23/2019 6:51 | 0.7    | -0.4083 | 3.3058 | -0.35   | 0.5913 | 4.8    | 0.1031 | -0.7418 |
| 4/23/2019 6:52 | 0.675  | 0.2833  | 2.638  | -0.6667 | 0.5913 | 4.8    | 0.1153 | -0.7418 |
| 4/23/2019 6:53 | 0.6083 | 0.05    | 3.3729 | -0.3167 | 0.5913 | 4.8    | 0.0956 | -0.7418 |
| 4/23/2019 6:54 | 0.6083 | -0.1917 | 3.3476 | -0.9667 | 0.5913 | 4.8    | 0.1125 | -0.7418 |



|                |        |         |        |         |        |         |        |         |
|----------------|--------|---------|--------|---------|--------|---------|--------|---------|
| 4/23/2019 6:55 | 0.6083 | 0.5     | 3.6187 | -0.4833 | 0.5913 | 4.8     | 0.1014 | -0.7418 |
| 4/23/2019 6:56 | 0.6    | 0.0333  | 3.2818 | -0.2167 | 0.5913 | 4.8     | 0.0747 | -0.7418 |
| 4/23/2019 6:57 | 0.6    | -0.125  | 3.0653 | -0.4167 | 0.5913 | 4.8     | 0.1044 | -0.7418 |
| 4/23/2019 6:58 | 0.6    | -0.175  | 3.0583 | 0.2167  | 0.5913 | 4.8     | 0.0967 | -0.7418 |
| 4/23/2019 6:59 | 0.6    | -0.0667 | 3.3366 | -0.6833 | 0.5913 | 4.8     | 0.0935 | -0.7418 |
| 4/23/2019 7:00 | 0.6917 | -0.2333 | 3.7184 | -0.15   | 0.5913 | 4.8545  | 0.1089 | -0.7418 |
| 4/23/2019 7:01 | 0.6167 | 0.375   | 3.5983 | -0.1833 | 0.5913 | 5.4455  | 0.1192 | -0.7418 |
| 4/23/2019 7:02 | 0.6    | -0.6917 | 6.7255 | -0.0833 | 0.5913 | 7.2083  | 0.296  | -0.7418 |
| 4/23/2019 7:03 | 0.575  | -0.4417 | 8.0453 | -0.15   | 0.5913 | 9.8917  | 0.4917 | -0.7418 |
| 4/23/2019 7:04 | 0.525  | -0.8    | 6.9602 | -0.75   | 0.5913 | 12.4818 | 0.4979 | -0.7418 |
| 4/23/2019 7:05 | 0.5917 | -0.0917 | 6.9458 | 0.2333  | 0.5913 | 15.3182 | 0.5232 | -0.7418 |
| 4/23/2019 7:06 | 0.55   | -0.5333 | 7.0446 | -0.2167 | 0.5913 | 17.9    | 0.5569 | -0.7418 |
| 4/23/2019 7:07 | 0.5667 | -1.1417 | 6.7636 | -0.15   | 0.5913 | 20.475  | 0.5607 | -0.7418 |
| 4/23/2019 7:08 | 0.6    | -1.075  | 6.912  | -0.4833 | 0.5913 | 23.125  | 0.5625 | -0.7418 |
| 4/23/2019 7:09 | 0.6    | -0.95   | 6.6251 | -0.4167 | 0.5913 | 25.6833 | 0.5377 | -0.7418 |
| 4/23/2019 7:10 | 0.6    | -0.6    | 6.4924 | -0.2167 | 0.5913 | 28.4111 | 0.5479 | -0.7418 |
| 4/23/2019 7:11 | 0.6    | -0.5167 | 6.2043 | -0.3333 | 0.5913 | 30.825  | 0.5368 | -0.7418 |
| 4/23/2019 7:12 | 0.6    | -0.7417 | 6.09   | 0.1667  | 0.5913 | 33.27   | 0.5207 | -0.7418 |
| 4/23/2019 7:13 | 0.6    | -0.8083 | 6.4239 | -0.25   | 0.5913 | 35.3546 | 0.5254 | -0.7418 |
| 4/23/2019 7:14 | 0.6    | 0.2917  | 6.2467 | -0.0333 | 0.5913 | 36.4273 | 0.5097 | -0.7418 |
| 4/23/2019 7:15 | 0.6    | -0.2833 | 6.1958 | -0.2833 | 0.5913 | 36.3818 | 0.5261 | -0.7418 |
| 4/23/2019 7:16 | 0.5727 | -0.625  | 6.2337 | 0.2333  | 0.5913 | 36.15   | 0.5038 | -0.7418 |
| 4/23/2019 7:17 | 0.5833 | -0.3167 | 6.2261 | -0.35   | 0.5913 | 35.88   | 0.5119 | -0.7418 |
| 4/23/2019 7:18 | 0.6    | -0.5083 | 6.1583 | -0.75   | 0.5913 | 35.5455 | 0.5103 | -0.7418 |
| 4/23/2019 7:19 | 0.6    | -0.925  | 5.9764 | -0.2333 | 0.5913 | 35.2    | 0.5    | -0.7418 |
| 4/23/2019 7:20 | 0.6    | -0.3583 | 5.6573 | -0.7667 | 0.5913 | 34.9273 | 0.5064 | -0.7418 |
| 4/23/2019 7:21 | 0.675  | -0.475  | 5.6466 | -0.5    | 0.5913 | 34.6727 | 0.5048 | -0.7418 |
| 4/23/2019 7:22 | 0.7    | -0.35   | 5.5928 | -0.35   | 0.5913 | 34.38   | 0.481  | -0.7418 |
| 4/23/2019 7:23 | 0.625  | -0.2833 | 5.709  | -0.25   | 0.5913 | 34.1273 | 0.4871 | -0.7418 |
| 4/23/2019 7:24 | 0.6    | -0.8417 | 5.5492 | -0.7333 | 0.5913 | 33.83   | 0.4873 | -0.7418 |
| 4/23/2019 7:25 | 0.6    | -0.7583 | 5.7968 | -0.6833 | 0.5913 | 33.6455 | 0.479  | -0.7418 |
| 4/23/2019 7:26 | 0.6167 | -0.3333 | 5.6436 | -0.7333 | 0.5913 | 33.47   | 0.487  | -0.7418 |
| 4/23/2019 7:27 | 0.7    | -0.5583 | 5.5735 | 0.0667  | 0.5913 | 33.3    | 0.4694 | -0.7418 |
| 4/23/2019 7:28 | 0.6583 | -0.5583 | 5.2672 | -0.6833 | 0.5913 | 33.09   | 0.48   | -0.7418 |
| 4/23/2019 7:29 | 0.6    | -0.1167 | 5.2908 | -1      | 0.5913 | 32.8909 | 0.4702 | -0.7418 |
| 4/23/2019 7:30 | 0.625  | -0.2333 | 5.3843 | -0.0333 | 0.5913 | 32.6909 | 0.4684 | -0.7418 |
| 4/23/2019 7:31 | 0.7    | -0.05   | 5.3858 | -0.1167 | 0.5913 | 32.525  | 0.4715 | -0.7418 |
| 4/23/2019 7:32 | 0.7    | -0.0333 | 5.2901 | -0.2667 | 0.5913 | 32.3    | 0.4663 | -0.7418 |
| 4/23/2019 7:33 | 0.6583 | -0.6583 | 5.3504 | -0.9167 | 0.5913 | 32.1333 | 0.4671 | -0.7418 |
| 4/23/2019 7:34 | 0.6    | -0.8    | 5.4829 | -1.35   | 0.5913 | 32.0091 | 0.4571 | -0.7418 |
| 4/23/2019 7:35 | 0.6    | -0.3417 | 5.2168 | 0.1167  | 0.5913 | 31.87   | 0.4557 | -0.7418 |
| 4/23/2019 7:36 | 0.6    | -0.775  | 5.2613 | -0.7167 | 0.5913 | 31.74   | 0.4601 | -0.7418 |
| 4/23/2019 7:37 | 0.6    | -0.7333 | 4.8326 | -0.0833 | 0.5913 | 31.5727 | 0.4559 | -0.7418 |
| 4/23/2019 7:38 | 0.6    | -0.5667 | 4.8697 | -0.8333 | 0.5913 | 31.4546 | 0.4549 | -0.7418 |
| 4/23/2019 7:39 | 0.6    | -0.4167 | 5.0183 | -0.0667 | 0.5913 | 31.2546 | 0.4517 | -0.7418 |
| 4/23/2019 7:40 | 0.6    | -0.625  | 5.0011 | -0.4333 | 0.5913 | 31.07   | 0.4476 | -0.7418 |
| 4/23/2019 7:41 | 0.6    | -0.5667 | 5.199  | -0.7167 | 0.5913 | 30.9636 | 0.459  | -0.7418 |

|                |        |         |        |         |        |         |        |         |
|----------------|--------|---------|--------|---------|--------|---------|--------|---------|
| 4/23/2019 7:42 | 0.6    | -0.6083 | 5.1169 | -0.8833 | 0.5913 | 30.7909 | 0.4373 | -0.7418 |
| 4/23/2019 7:43 | 0.6    | 0.0167  | 5.0355 | -0.3667 | 0.5913 | 30.67   | 0.4409 | -0.7418 |
| 4/23/2019 7:44 | 0.5917 | -0.0917 | 5.0174 | -0.2667 | 0.5913 | 30.5    | 0.4511 | -0.7418 |
| 4/23/2019 7:45 | 0.6    | -0.425  | 4.8553 | 0.0333  | 0.5913 | 30.3364 | 0.4367 | -0.7418 |
| 4/23/2019 7:46 | 0.6    | -0.7    | 5.2871 | -0.3167 | 0.5913 | 30.2222 | 0.4489 | -0.7418 |
| 4/23/2019 7:47 | 0.6    | -0.65   | 4.9636 | -0.7167 | 0.5913 | 30.12   | 0.4413 | -0.7418 |
| 4/23/2019 7:48 | 0.6    | -0.6167 | 4.9323 | -0.9167 | 0.5913 | 29.99   | 0.4416 | -0.7418 |
| 4/23/2019 7:49 | 0.6    | -0.0417 | 5.0016 | -0.8    | 0.5913 | 29.8455 | 0.4388 | -0.7418 |
| 4/23/2019 7:50 | 0.6    | -0.0417 | 4.6711 | -0.9667 | 0.5913 | 29.6667 | 0.436  | -0.7418 |
| 4/23/2019 7:51 | 0.6    | -0.6417 | 4.8112 | -0.8    | 0.5913 | 29.5546 | 0.4344 | -0.7418 |
| 4/23/2019 7:52 | 0.6917 | -0.075  | 5.0183 | -0.95   | 0.5913 | 29.4727 | 0.4251 | -0.7418 |
| 4/23/2019 7:53 | 0.6833 | -0.425  | 4.6172 | -0.6    | 0.5913 | 29.3455 | 0.4296 | -0.7418 |
| 4/23/2019 7:54 | 0.625  | -0.2333 | 4.9063 | -0.6    | 0.5913 | 29.3    | 0.4341 | -0.7418 |
| 4/23/2019 7:55 | 0.7    | -0.3    | 4.7192 | -0.65   | 0.5913 | 29.2083 | 0.4201 | -0.7418 |
| 4/23/2019 7:56 | 0.6667 | -0.9    | 4.8266 | -0.7167 | 0.5913 | 29.1455 | 0.4271 | -0.7418 |
| 4/23/2019 7:57 | 0.6    | 0.0333  | 4.8493 | -0.3667 | 0.5913 | 29.06   | 0.4249 | -0.7418 |
| 4/23/2019 7:58 | 0.6    | -0.3083 | 4.7598 | -0.8667 | 0.5913 | 28.9583 | 0.4172 | -0.7418 |
| 4/23/2019 7:59 | 0.6333 | 0.225   | 4.7412 | -0.5167 | 0.5913 | 28.8727 | 0.4329 | -0.7418 |
| 4/23/2019 8:00 | 0.7667 | -0.5833 | 4.6324 | 0.05    | 0.5913 | 28.7273 | 0.4171 | -0.7418 |
| 4/23/2019 8:01 | 0.7833 | -0.2667 | 4.5004 | -0.6833 | 0.5913 | 28.62   | 0.4198 | -0.7418 |
| 4/23/2019 8:02 | 0.7    | 0.1083  | 4.8183 | -0.0833 | 0.5913 | 28.4636 | 0.4151 | -0.7418 |
| 4/23/2019 8:03 | 0.625  | -0.7167 | 4.5785 | -0.3833 | 0.5913 | 28.3182 | 0.4142 | -0.7418 |
| 4/23/2019 8:04 | 0.6    | -0.35   | 4.7333 | -0.15   | 0.5913 | 28.1636 | 0.4176 | -0.7418 |
| 4/23/2019 8:05 | 0.6    | -0.3167 | 4.6243 | -0.6333 | 0.5913 | 28.0546 | 0.4048 | -0.7418 |
| 4/23/2019 8:06 | 0.5917 | -0.4167 | 4.6518 | -0.7833 | 0.5913 | 27.89   | 0.4142 | -0.7418 |
| 4/23/2019 8:07 | 0.575  | -0.6583 | 4.604  | -0.8    | 0.5913 | 27.7636 | 0.4082 | -0.7418 |
| 4/23/2019 8:08 | 0.5    | -0.075  | 4.6785 | -0.6167 | 0.5913 | 27.62   | 0.3948 | -0.7418 |
| 4/23/2019 8:09 | 0.5    | -0.4333 | 4.3177 | -0.4167 | 0.5913 | 27.52   | 0.4034 | -0.7418 |
| 4/23/2019 8:10 | 0.5    | -0.1583 | 4.6028 | -0.3667 | 0.5913 | 27.3546 | 0.4117 | -0.7418 |
| 4/23/2019 8:11 | 0.5083 | -0.3583 | 4.165  | -0.65   | 0.5913 | 27.2091 | 0.4013 | -0.7418 |
| 4/23/2019 8:12 | 0.6    | -0.3583 | 4.418  | -0.0333 | 0.5913 | 27.08   | 0.402  | -0.7418 |
| 4/23/2019 8:13 | 0.6    | -1.0417 | 4.4142 | -0.1333 | 0.5913 | 26.9727 | 0.3915 | -0.7418 |
| 4/23/2019 8:14 | 0.6    | -0.2667 | 4.4688 | -0.8333 | 0.5913 | 26.89   | 0.3907 | -0.7418 |
| 4/23/2019 8:15 | 0.6    | -0.325  | 4.1928 | -0.2667 | 0.5913 | 26.8    | 0.3894 | -0.7418 |
| 4/23/2019 8:16 | 0.6    | -0.025  | 4.364  | -0.4    | 0.5913 | 26.7083 | 0.3903 | -0.7418 |
| 4/23/2019 8:17 | 0.675  | -0.675  | 4.2843 | -0.75   | 0.5913 | 26.5818 | 0.3947 | -0.7418 |
| 4/23/2019 8:18 | 0.7    | 0.2833  | 4.3718 | -0.9    | 0.5913 | 26.5    | 0.3878 | -0.7418 |
| 4/23/2019 8:19 | 0.7    | -0.475  | 4.3258 | -0.7333 | 0.5913 | 26.4    | 0.4019 | -0.7418 |
| 4/23/2019 8:20 | 0.7    | -0.2833 | 4.385  | -0.45   | 0.5913 | 26.3    | 0.3918 | -0.7418 |
| 4/23/2019 8:21 | 0.7    | 0.1583  | 4.3207 | -0.2833 | 0.5913 | 26.2091 | 0.3893 | -0.7418 |
| 4/23/2019 8:22 | 0.7917 | -0.4083 | 4.4502 | -0.2    | 0.5913 | 26.07   | 0.4044 | -0.7418 |
| 4/23/2019 8:23 | 0.8    | -0.425  | 4.5843 | -0.7667 | 0.5913 | 25.9417 | 0.3925 | -0.7418 |
| 4/23/2019 8:24 | 0.8333 | -0.325  | 4.1235 | -0.2333 | 0.5913 | 25.8583 | 0.3989 | -0.7418 |
| 4/23/2019 8:25 | 0.8083 | -0.6917 | 4.0538 | -0.2833 | 0.5913 | 25.7091 | 0.4022 | -0.7418 |
| 4/23/2019 8:26 | 0.8545 | -0.9167 | 4.1177 | 0.1     | 0.5913 | 25.53   | 0.3735 | -0.7418 |
| 4/23/2019 8:27 | 0.9    | -0.5833 | 4.1508 | -0.0833 | 0.5913 | 25.225  | 0.3655 | -0.7418 |
| 4/23/2019 8:28 | 1.1917 | 2.6333  | 4.8398 | 2.9833  | 0.5913 | 24.5455 | 0.305  | -0.7418 |

|                |        |         |         |         |        |         |        |         |
|----------------|--------|---------|---------|---------|--------|---------|--------|---------|
| 4/23/2019 8:29 | 1.9    | 4.9     | 5.4092  | 3.8     | 0.5913 | 23.125  | 0.2089 | -0.7418 |
| 4/23/2019 8:30 | 2.525  | 3.7417  | 5.2713  | 3.9     | 0.5913 | 21.8727 | 0.2379 | -0.7418 |
| 4/23/2019 8:31 | 2.8    | 3.75    | 5.1967  | 3.85    | 0.5913 | 20.81   | 0.2444 | -0.7418 |
| 4/23/2019 8:32 | 2.7083 | 3.775   | 6.2335  | 4.4833  | 0.5913 | 19.5818 | 0.2295 | -0.7418 |
| 4/23/2019 8:33 | 2.8583 | 4.6417  | 5.887   | 4.65    | 0.5913 | 18.2    | 0.2185 | -0.7418 |
| 4/23/2019 8:34 | 3      | 3.8083  | 5.3538  | 3.2667  | 0.5913 | 16.725  | 0.2052 | -0.7418 |
| 4/23/2019 8:35 | 2.9917 | 4.5083  | 6.062   | 3.95    | 0.5913 | 15.3091 | 0.2061 | -0.7418 |
| 4/23/2019 8:36 | 2.9    | 4.3917  | 5.9487  | 4.35    | 0.5913 | 13.775  | 0.1939 | -0.7418 |
| 4/23/2019 8:37 | 3.225  | 7.0917  | 7.8607  | 7.1167  | 0.5913 | 12.1    | 0.1523 | -0.7418 |
| 4/23/2019 8:38 | 3.5417 | 6.0583  | 7.256   | 6.4167  | 0.5913 | 10.5583 | 0.174  | -0.7418 |
| 4/23/2019 8:39 | 4.025  | 8.1833  | 8.8158  | 8.15    | 0.5913 | 9.13    | 0.1519 | -0.7418 |
| 4/23/2019 8:40 | 4.3917 | 8.8167  | 9.184   | 8.5167  | 0.5913 | 7.7636  | 0.1376 | -0.7418 |
| 4/23/2019 8:41 | 4.7417 | 9.0167  | 8.8852  | 7.8     | 0.5913 | 7.2091  | 0.1521 | -0.7418 |
| 4/23/2019 8:42 | 5.0083 | 9.7     | 9.4725  | 9.45    | 0.5913 | 6.7364  | 0.1306 | -0.7418 |
| 4/23/2019 8:43 | 5.0667 | 9.3917  | 10.004  | 8.6333  | 0.5913 | 5.92    | 0.1364 | -0.7418 |
| 4/23/2019 8:44 | 5.3    | 10.075  | 10.365  | 10.3    | 0.5913 | 5.3545  | 0.1331 | -0.7418 |
| 4/23/2019 8:45 | 5.65   | 11.3083 | 11.695  | 11.1833 | 0.5913 | 4.7273  | 0.111  | -0.7418 |
| 4/23/2019 8:46 | 6.025  | 11.5417 | 11.7733 | 11.0333 | 0.5913 | 4.31    | 0.1257 | -0.7418 |
| 4/23/2019 8:47 | 6.2417 | 11.1417 | 11.7517 | 10.8333 | 0.5913 | 3.81    | 0.1119 | -0.7418 |
| 4/23/2019 8:48 | 6.1583 | 10.1083 | 10.9812 | 10.2333 | 0.5913 | 3.3636  | 0.1072 | -0.7418 |
| 4/23/2019 8:49 | 5.9333 | 10.925  | 10.9717 | 10.4    | 0.5913 | 3.0727  | 0.1231 | -0.7418 |
| 4/23/2019 8:50 | 5.8833 | 11.625  | 11.4867 | 11.0833 | 0.5913 | 2.8364  | 0.1024 | -0.7418 |
| 4/23/2019 8:51 | 6.0167 | 11.4833 | 11.71   | 11.8167 | 0.5913 | 2.6364  | 0.1102 | -0.7418 |
| 4/23/2019 8:52 | 6.1    | 10.575  | 11.0733 | 10.7333 | 0.5913 | 2.5182  | 0.121  | -0.7418 |
| 4/23/2019 8:53 | 6.125  | 10.8    | 10.9967 | 10.1833 | 0.5913 | 2.35    | 0.1142 | -0.7418 |
| 4/23/2019 8:54 | 5.8667 | 10.3083 | 10.595  | 9.3167  | 0.5913 | 2.27    | 0.1305 | -0.7418 |
| 4/23/2019 8:55 | 5.6167 | 10.0083 | 9.536   | 9.0333  | 0.5913 | 2.2     | 0.1413 | -0.7418 |
| 4/23/2019 8:56 | 5.25   | 7.7917  | 8.606   | 8.0167  | 0.5913 | 2.2     | 0.1369 | -0.7418 |
| 4/23/2019 8:57 | 4.8818 | 7.4167  | 8.0423  | 7.95    | 0.5913 | 2.2167  | 0.162  | -0.7418 |
| 4/23/2019 8:58 | 4.6167 | 7.1083  | 7.3633  | 7.75    | 0.5913 | 2.35    | 0.165  | -0.7418 |
| 4/23/2019 8:59 | 4.375  | 6.4917  | 7.104   | 6.9833  | 0.5913 | 2.4636  | 0.1516 | -0.7418 |
| 4/23/2019 9:00 | 4.2167 | 6.85    | 7.0092  | 6.7833  | 0.5913 | 2.5545  | 0.1654 | -0.7418 |
| 4/23/2019 9:01 | 4.05   | 6.35    | 6.864   | 6.4667  | 0.5913 | 2.6636  | 0.1505 | -0.7418 |
| 4/23/2019 9:02 | 3.85   | 6.0667  | 6.508   | 5.8333  | 0.5913 | 2.85    | 0.153  | -0.7418 |
| 4/23/2019 9:03 | 3.8    | 6.1167  | 6.9908  | 6.5167  | 0.5913 | 2.9583  | 0.1559 | -0.7418 |
| 4/23/2019 9:04 | 3.925  | 6.7333  | 7.4615  | 7.1333  | 0.5913 | 3.07    | 0.1361 | -0.7418 |
| 4/23/2019 9:05 | 4      | 6.275   | 6.6258  | 5.3     | 0.5913 | 3.14    | 0.1441 | -0.7418 |
| 4/23/2019 9:06 | 3.925  | 5.575   | 6.3657  | 4.9833  | 0.5913 | 3.2083  | 0.1451 | -0.7418 |
| 4/23/2019 9:07 | 3.7    | 5.65    | 6.1148  | 4.8667  | 0.5913 | 3.3     | 0.139  | -0.7418 |
| 4/23/2019 9:08 | 3.5083 | 4.9833  | 5.6723  | 4.4     | 0.5913 | 3.2091  | 0.1417 | -0.7418 |
| 4/23/2019 9:09 | 3.3833 | 4.7167  | 5.3282  | 4.4167  | 0.5913 | 3.2     | 0.1378 | -0.7418 |
| 4/23/2019 9:10 | 3.2833 | 4.825   | 5.5368  | 4.1     | 0.5913 | 3.14    | 0.131  | -0.7418 |
| 4/23/2019 9:11 | 3.1917 | 4.2     | 5.665   | 3.7667  | 0.5913 | 3.0364  | 0.1487 | -0.7418 |
| 4/23/2019 9:12 | 3.0667 | 4.7667  | 5.274   | 3.8333  | 0.5913 | 3       | 0.1304 | -0.7418 |
| 4/23/2019 9:13 | 2.9583 | 3.5083  | 5.4737  | 3.8167  | 0.5913 | 2.9444  | 0.1387 | -0.7418 |
| 4/23/2019 9:14 | 2.8    | 4.4417  | 4.8115  | 2.95    | 0.5913 | 2.8583  | 0.1402 | -0.7418 |
| 4/23/2019 9:15 | 2.6083 | 3.575   | 4.9033  | 2.9333  | 0.5913 | 2.8818  | 0.1427 | -0.7418 |

|                 |        |         |         |         |        |         |        |         |
|-----------------|--------|---------|---------|---------|--------|---------|--------|---------|
| 4/23/2019 9:16  | 2.1167 | 1.0917  | 4.2097  | 0.6167  | 0.5913 | 27.2833 | 0.2419 | -0.7418 |
| 4/23/2019 9:17  | 1.4917 | 0.4     | 7.2987  | -0.55   | 0.5913 | 80.14   | 0.4458 | -0.7418 |
| 4/23/2019 9:18  | 0.925  | -0.5833 | 13.1917 | 0.25    | 0.5913 | 71.3833 | 0.7208 | -0.7418 |
| 4/23/2019 9:19  | 0.625  | -0.1833 | 13.3183 | -0.1667 | 0.5913 | 70.75   | 0.8519 | -0.7418 |
| 4/23/2019 9:20  | 0.6    | -0.4417 | 13.6417 | -0.0667 | 0.5913 | 76.95   | 0.9606 | -0.7418 |
| 4/23/2019 9:21  | 0.5    | -0.15   | 13.69   | 0.1667  | 0.5913 | 77.0833 | 1.0915 | -0.7418 |
| 4/23/2019 9:22  | 0.5917 | -0.5083 | 13.6    | -0.1167 | 0.5913 | 76.7636 | 1.196  | -0.7418 |
| 4/23/2019 9:23  | 0.6    | -1.0083 | 12.7833 | -0.3167 | 0.5913 | 73.3    | 1.2163 | -0.7418 |
| 4/23/2019 9:24  | 0.6    | -0.3833 | 12.8267 | -0.1    | 0.5913 | 73.4333 | 1.25   | -0.7418 |
| 4/23/2019 9:25  | 0.5833 | -0.8583 | 12.2767 | -0.2    | 0.5913 | 72.1364 | 1.2278 | -0.7418 |
| 4/23/2019 9:26  | 0.525  | -0.2917 | 11.9867 | -0.5    | 0.5913 | 71.4545 | 1.2337 | -0.7418 |
| 4/23/2019 9:27  | 0.5    | 0.0833  | 11.9883 | -0.1833 | 0.5913 | 71.0583 | 1.246  | -0.7418 |
| 4/23/2019 9:28  | 0.5    | 0.6417  | 11.5083 | -0.2    | 0.5913 | 68.9    | 1.2325 | -0.7418 |
| 4/23/2019 9:29  | 0.5    | -0.6333 | 11.3    | -0.6333 | 0.5913 | 68.6583 | 1.2598 | -0.7418 |
| 4/23/2019 9:30  | 0.5    | -0.45   | 11.0183 | -0.3333 | 0.5913 | 68.7091 | 1.2525 | -0.7418 |
| 4/23/2019 9:31  | 0.525  | 0.0167  | 10.7    | -0.1    | 0.5913 | 68.8    | 1.212  | -0.7418 |
| 4/23/2019 9:32  | 0.5083 | -0.5333 | 10.6075 | 0.0833  | 0.5913 | 68.8    | 1.2318 | -0.7418 |
| 4/23/2019 9:33  | 0.5083 | 0.2333  | 10.5533 | -0.5    | 0.5913 | 68.7583 | 1.225  | -0.7418 |
| 4/23/2019 9:34  | 0.5    | -0.875  | 10.5292 | -0.6333 | 0.5913 | 68.6455 | 1.2075 | -0.7418 |
| 4/23/2019 9:35  | 0.5    | -0.6583 | 10.4275 | -0.4    | 0.5913 | 68.4545 | 1.2138 | -0.7418 |
| 4/23/2019 9:36  | 0.5    | -0.6667 | 10.2661 | -0.7    | 0.5913 | 68.3417 | 1.1807 | -0.7418 |
| 4/23/2019 9:37  | 0.575  | -0.1833 | 9.6449  | -0.25   | 0.5913 | 68.1333 | 1.1872 | -0.7418 |
| 4/23/2019 9:38  | 0.5    | -0.7583 | 9.7336  | -0.2167 | 0.5913 | 67.8546 | 1.1787 | -0.7418 |
| 4/23/2019 9:39  | 0.5    | 0.05    | 9.3514  | -0.2333 | 0.5913 | 67.6    | 1.158  | -0.7418 |
| 4/23/2019 9:40  | 0.5    | -0.7833 | 9.2002  | -0.4833 | 0.5913 | 67.3    | 1.168  | -0.7418 |
| 4/23/2019 9:41  | 0.5    | -0.1417 | 9.1051  | 0.0167  | 0.5913 | 66.9909 | 1.1447 | -0.7418 |
| 4/23/2019 9:42  | 0.55   | -0.55   | 8.8628  | -0.55   | 0.5913 | 66.5636 | 1.1498 | -0.7418 |
| 4/23/2019 9:43  | 0.6    | -0.6083 | 8.8258  | -0.6333 | 0.5913 | 66.1417 | 1.1542 | -0.7418 |
| 4/23/2019 9:44  | 0.6    | -0.3833 | 8.6448  | -0.5667 | 0.5913 | 65.6445 | 1.1263 | -0.7418 |
| 4/23/2019 9:45  | 0.625  | -0.3167 | 8.4599  | -0.5    | 0.5913 | 65.27   | 1.1387 | -0.7418 |
| 4/23/2019 9:46  | 0.7    | -0.3    | 8.3257  | -0.45   | 0.5913 | 64.8333 | 1.1253 | -0.7418 |
| 4/23/2019 9:47  | 0.6417 | -0.7917 | 8.5889  | -0.1833 | 0.5913 | 64.4778 | 1.1147 | -0.7418 |
| 4/23/2019 9:48  | 0.6667 | -0.4833 | 8.2553  | -0.1833 | 0.5913 | 64.17   | 1.1125 | -0.7418 |
| 4/23/2019 9:49  | 0.7    | -0.1417 | 7.8843  | -0.65   | 0.5913 | 63.8667 | 1.0962 | -0.7418 |
| 4/23/2019 9:50  | 0.75   | -0.4667 | 8.211   | -0.35   | 0.5913 | 63.5636 | 1.0982 | -0.7418 |
| 4/23/2019 9:51  | 0.8    | -0.85   | 7.8127  | -0.4667 | 0.5913 | 63.31   | 1.1003 | -0.7418 |
| 4/23/2019 9:52  | 0.7583 | -1.0083 | 7.7448  | -0.8333 | 0.5913 | 63.04   | 1.081  | -0.7418 |
| 4/23/2019 9:53  | 0.7083 | -0.5583 | 7.9339  | -0.25   | 0.5913 | 62.7091 | 1.0965 | -0.7418 |
| 4/23/2019 9:54  | 0.7417 | -0.6    | 7.7468  | -0.35   | 0.5913 | 62.4091 | 1.083  | -0.7418 |
| 4/23/2019 9:55  | 0.775  | -0.5417 | 7.5771  | -0.9167 | 0.5913 | 62.15   | 1.0767 | -0.7418 |
| 4/23/2019 9:56  | 0.8    | -0.7417 | 7.7656  | -0.55   | 0.5913 | 61.9    | 1.0835 | -0.7418 |
| 4/23/2019 9:57  | 0.8182 | -0.6083 | 7.4842  | -0.4833 | 0.5913 | 61.65   | 1.0758 | -0.7418 |
| 4/23/2019 9:58  | 0.875  | -0.1083 | 7.2236  | -0.85   | 0.5913 | 61.4    | 1.0715 | -0.7418 |
| 4/23/2019 9:59  | 0.8417 | -0.8    | 7.2751  | -0.3167 | 0.5913 | 61.18   | 1.0715 | -0.7418 |
| 4/23/2019 10:00 | 0.7333 | -0.425  | 7.3242  | -0.6667 | 0.5913 | 60.925  | 1.0518 | -0.7418 |
| 4/23/2019 10:01 | 0.6667 | -0.25   | 7.2373  | -0.6333 | 0.5913 | 60.6727 | 1.069  | -0.7418 |
| 4/23/2019 10:02 | 0.6    | 0.325   | 7.4451  | -0.0667 | 0.5913 | 60.4273 | 1.0588 | -0.7418 |

|                 |        |         |        |         |        |         |        |         |
|-----------------|--------|---------|--------|---------|--------|---------|--------|---------|
| 4/23/2019 10:03 | 0.625  | 0.025   | 7.0892 | -0.1333 | 0.5913 | 60.1545 | 1.0403 | -0.7418 |
| 4/23/2019 10:04 | 0.6083 | -0.4167 | 7.0315 | -0.8833 | 0.5913 | 59.8818 | 1.0543 | -0.7418 |
| 4/23/2019 10:05 | 0.6    | -0.7833 | 7.0383 | -0.4    | 0.5913 | 59.6167 | 1.0437 | -0.7418 |
| 4/23/2019 10:06 | 0.6167 | -0.6083 | 6.7135 | -0.2833 | 0.5913 | 59.3    | 1.03   | -0.7418 |
| 4/23/2019 10:07 | 0.6583 | -0.425  | 6.8093 | -0.5167 | 0.5913 | 59.0583 | 1.0362 | -0.7418 |
| 4/23/2019 10:08 | 0.6    | -0.575  | 6.8433 | -0.5    | 0.5913 | 58.78   | 1.023  | -0.7418 |
| 4/23/2019 10:09 | 0.6    | -0.3333 | 6.7408 | -0.6333 | 0.5913 | 58.5167 | 1.0297 | -0.7418 |
| 4/23/2019 10:10 | 0.6    | -0.0083 | 6.4594 | -0.5833 | 0.5913 | 58.26   | 1.0272 | -0.7418 |
| 4/23/2019 10:11 | 0.5417 | -0.1667 | 6.7615 | -0.1333 | 0.5913 | 58.0333 | 1.0148 | -0.7418 |
| 4/23/2019 10:12 | 0.5333 | -0.1583 | 6.8029 | -0.75   | 0.5913 | 57.8    | 1.0247 | -0.7418 |
| 4/23/2019 10:13 | 0.5583 | 0.0167  | 6.6133 | -0.7833 | 0.5913 | 57.5455 | 1.0118 | -0.7418 |
| 4/23/2019 10:14 | 0.5583 | -0.6333 | 6.6493 | -0.45   | 0.5913 | 57.28   | 1.0075 | -0.7418 |
| 4/23/2019 10:15 | 0.5    | -0.9417 | 6.4844 | -0.35   | 0.5913 | 57.0273 | 1.0133 | -0.7418 |
| 4/23/2019 10:16 | 0.5    | -0.2083 | 6.3514 | 0.2     | 0.5913 | 56.8    | 0.9881 | -0.7418 |
| 4/23/2019 10:17 | 0.5    | -0.35   | 6.098  | -0.8    | 0.5913 | 56.5111 | 1.0033 | -0.7418 |
| 4/23/2019 10:18 | 0.5    | -0.1083 | 6.4833 | -0.25   | 0.5913 | 56.3091 | 0.9964 | -0.7418 |
| 4/23/2019 10:19 | 0.5    | -0.4833 | 6.1218 | -0.6167 | 0.5913 | 56.1455 | 0.9792 | -0.7418 |
| 4/23/2019 10:20 | 0.5    | -0.875  | 6.2443 | -0.2    | 0.5913 | 55.9727 | 0.9977 | -0.7418 |
| 4/23/2019 10:21 | 0.5    | -0.3583 | 6.2233 | -0.5    | 0.5913 | 55.8    | 0.9712 | -0.7418 |
| 4/23/2019 10:22 | 0.5    | 0.1333  | 6.0393 | -0.5667 | 0.5913 | 55.5727 | 0.9838 | -0.7418 |
| 4/23/2019 10:23 | 0.5167 | -0.9333 | 6.0246 | -1.0167 | 0.5913 | 55.4364 | 0.978  | -0.7418 |
| 4/23/2019 10:24 | 0.5    | -0.5917 | 6.1638 | -0.6167 | 0.5913 | 55.1417 | 0.9748 | -0.7418 |
| 4/23/2019 10:25 | 0.5    | -0.5917 | 5.8878 | 0.0333  | 0.5913 | 54.95   | 0.9754 | -0.7418 |
| 4/23/2019 10:26 | 0.5    | -0.6167 | 5.5601 | -0.1667 | 0.5913 | 54.8455 | 0.9618 | -0.7418 |
| 4/23/2019 10:27 | 0.5    | -0.4333 | 5.8203 | -0.5    | 0.5913 | 54.6417 | 0.9705 | -0.7418 |
| 4/23/2019 10:28 | 0.5167 | -1.4083 | 5.9148 | -0.15   | 0.5913 | 54.5455 | 0.9678 | -0.7418 |
| 4/23/2019 10:29 | 0.5    | -1.275  | 5.804  | -0.6167 | 0.5913 | 54.4417 | 0.9543 | -0.7418 |
| 4/23/2019 10:30 | 0.6    | -0.3917 | 5.8351 | -0.2333 | 0.5913 | 54.3444 | 0.9714 | -0.7418 |
| 4/23/2019 10:31 | 0.6    | -0.2333 | 5.9018 | -0.4167 | 0.5913 | 54.1083 | 0.9506 | -0.7418 |
| 4/23/2019 10:32 | 0.6917 | -0.3083 | 5.9677 | -0.2667 | 0.5913 | 53.9091 | 0.9566 | -0.7418 |
| 4/23/2019 10:33 | 0.7    | -0.6333 | 5.646  | 0.05    | 0.5913 | 53.7417 | 0.9506 | -0.7418 |
| 4/23/2019 10:34 | 0.7417 | -0.4417 | 5.696  | -0.15   | 0.5913 | 53.6273 | 0.9369 | -0.7418 |
| 4/23/2019 10:35 | 0.775  | -0.3583 | 5.4402 | -0.4333 | 0.5913 | 53.4    | 0.9547 | -0.7418 |
| 4/23/2019 10:36 | 0.8    | -0.075  | 5.6382 | -0.55   | 0.5913 | 53.29   | 0.9419 | -0.7418 |
| 4/23/2019 10:37 | 0.8    | -0.8333 | 5.6944 | -0.95   | 0.5913 | 53.1583 | 0.9337 | -0.7418 |
| 4/23/2019 10:38 | 0.8    | -0.3583 | 5.5254 | -0.6833 | 0.5913 | 52.9833 | 0.9496 | -0.7418 |
| 4/23/2019 10:39 | 0.7333 | -0.9333 | 5.6263 | -0.6667 | 0.5913 | 52.8182 | 0.9307 | -0.7418 |
| 4/23/2019 10:40 | 0.7417 | -0.9    | 5.437  | -0.0333 | 0.5913 | 52.5818 | 0.9342 | -0.7418 |
| 4/23/2019 10:41 | 0.7917 | -0.725  | 5.3895 | -0.25   | 0.5913 | 52.4    | 0.9317 | -0.7418 |
| 4/23/2019 10:42 | 0.8    | -1.0833 | 5.415  | -0.3    | 0.5913 | 52.2    | 0.9123 | -0.7418 |
| 4/23/2019 10:43 | 0.8    | -0.4417 | 5.3563 | -0.6167 | 0.5913 | 52.06   | 0.9248 | -0.7418 |
| 4/23/2019 10:44 | 0.8    | -0.525  | 5.3828 | -0.7333 | 0.5913 | 51.9083 | 0.899  | -0.7418 |
| 4/23/2019 10:45 | 0.8    | -0.35   | 5.0911 | -0.1333 | 0.5913 | 51.6909 | 0.8931 | -0.7418 |
| 4/23/2019 10:46 | 0.825  | 0.2917  | 5.2454 | -0.0833 | 0.5913 | 51.1818 | 0.8257 | -0.7418 |
| 4/23/2019 10:47 | 1.3    | 3.7     | 4.9087 | 3.55    | 0.5913 | 49.2    | 0.4707 | -0.7418 |
| 4/23/2019 10:48 | 2.1083 | 4.1833  | 5.4512 | 4.05    | 0.5913 | 46.3636 | 0.3678 | -0.7418 |
| 4/23/2019 10:49 | 2.8667 | 4.5     | 5.1096 | 4.0833  | 0.5913 | 43.1833 | 0.3486 | -0.7418 |

|                 |        |         |         |         |        |         |        |         |
|-----------------|--------|---------|---------|---------|--------|---------|--------|---------|
| 4/23/2019 10:50 | 3.2    | 4.8167  | 5.6995  | 5.3     | 0.5913 | 39.9909 | 0.3121 | -0.7418 |
| 4/23/2019 10:51 | 3.325  | 6.175   | 6.2459  | 5.7833  | 0.5913 | 36.6333 | 0.3166 | -0.7418 |
| 4/23/2019 10:52 | 3.2333 | 3.0667  | 5.4936  | 3.9833  | 0.5913 | 33.78   | 0.3848 | -0.7418 |
| 4/23/2019 10:53 | 2.9    | 3.2583  | 5.0564  | 3.6333  | 0.5913 | 31.1364 | 0.4193 | -0.7418 |
| 4/23/2019 10:54 | 3.0917 | 7.5167  | 7.6008  | 7.3     | 0.5913 | 27.8    | 0.2835 | -0.7418 |
| 4/23/2019 10:55 | 3.7833 | 8.4417  | 8.3478  | 8.6333  | 0.5913 | 24.78   | 0.2351 | -0.7418 |
| 4/23/2019 10:56 | 5.1083 | 10.55   | 10.5242 | 10.9    | 0.5913 | 20.7    | 0.1886 | -0.7418 |
| 4/23/2019 10:57 | 5.8167 | 10.1667 | 10.1534 | 10.0667 | 0.5913 | 16.96   | 0.189  | -0.7418 |
| 4/23/2019 10:58 | 6.1167 | 9.9333  | 9.9378  | 10.2    | 0.5913 | 13.35   | 0.1783 | -0.7418 |
| 4/23/2019 10:59 | 5.9667 | 10.325  | 9.9827  | 10.5667 | 0.5913 | 11.0556 | 0.1758 | -0.7418 |
| 4/23/2019 11:00 | 5.85   | 9.9083  | 9.3725  | 10.4333 | 0.5913 | 9.9636  | 0.1683 | -0.7418 |
| 4/23/2019 11:01 | 5.9417 | 11.2833 | 8.9572  | 10.7167 | 0.5913 | 9.1818  | 0.1671 | -0.7418 |
| 4/23/2019 11:02 | 6.0583 | 10.1083 | 10.2103 | 10.2333 | 0.5913 | 8.4273  | 0.1633 | -0.7418 |
| 4/23/2019 11:03 | 5.9333 | 8.9667  | 8.9258  | 8.8167  | 0.5913 | 7.85    | 0.1797 | -0.7418 |
| 4/23/2019 11:04 | 5.8333 | 9.9333  | 10.4608 | 9.4667  | 0.5913 | 7.0167  | 0.178  | -0.7418 |
| 4/23/2019 11:05 | 5.5583 | 9.675   | 9.6647  | 9.6167  | 0.5913 | 5.9     | 0.1793 | -0.7418 |
| 4/23/2019 11:06 | 5.7333 | 10.6417 | 10.1617 | 10.35   | 0.5913 | 4.9417  | 0.1458 | -0.7418 |
| 4/23/2019 11:07 | 5.9167 | 10.8667 | 10.7633 | 11.15   | 0.5913 | 4.6     | 0.1414 | -0.7418 |
| 4/23/2019 11:08 | 6.2    | 9.925   | 10.2657 | 10      | 0.5913 | 4.4     | 0.1427 | -0.7418 |
| 4/23/2019 11:09 | 6.225  | 9.7083  | 10.3387 | 10.0333 | 0.5913 | 4.3455  | 0.1357 | -0.7418 |
| 4/23/2019 11:10 | 6.5833 | 13.1667 | 12.65   | 12.7667 | 0.5913 | 4.1167  | 0.1215 | -0.7418 |
| 4/23/2019 11:11 | 6.9    | 12.6917 | 12.3367 | 12.0833 | 0.5913 | 3.8909  | 0.1274 | -0.7418 |
| 4/23/2019 11:12 | 7.1583 | 10.8167 | 10.9218 | 10.7333 | 0.5913 | 3.8     | 0.3208 | -0.7418 |
| 4/23/2019 11:13 | 6.6    | 7.8667  | 8.4067  | 7.9833  | 0.5913 | 3.9273  | 0.5147 | -0.7418 |
| 4/23/2019 11:14 | 6.125  | 9.475   | 9.5143  | 9.2167  | 0.5913 | 4.0333  | 0.4393 | -0.7418 |
| 4/23/2019 11:15 | 6.175  | 12.9583 | 12.1217 | 11.95   | 0.5913 | 3.9545  | 0.3177 | -0.7418 |
| 4/23/2019 11:16 | 6.8917 | 12.85   | 12.9367 | 12.65   | 0.5913 | 3.8417  | 0.2252 | -0.7418 |
| 4/23/2019 11:17 | 7.5083 | 12.6083 | 12.855  | 11.8    | 0.5913 | 3.7545  | 0.2012 | -0.7418 |
| 4/23/2019 11:18 | 7.675  | 12.1667 | 12.3767 | 11.5333 | 0.5913 | 3.675   | 0.195  | -0.7418 |
| 4/23/2019 11:19 | 7.6333 | 12.6417 | 12.7867 | 12.6667 | 0.5913 | 3.5917  | 0.1521 | -0.7418 |
| 4/23/2019 11:20 | 7.8083 | 12.875  | 13.6083 | 12.3833 | 0.5913 | 3.48    | 0.1531 | -0.7418 |
| 4/23/2019 11:21 | 7.9917 | 13.2833 | 13.2983 | 13.0333 | 0.5913 | 3.4     | 0.1569 | -0.7418 |
| 4/23/2019 11:22 | 8.0333 | 12.1333 | 12.3083 | 11.4167 | 0.5913 | 3.4     | 0.1408 | -0.7418 |
| 4/23/2019 11:23 | 7.6417 | 10.2417 | 11.01   | 10.4333 | 0.5913 | 3.45    | 0.1574 | -0.7418 |
| 4/23/2019 11:24 | 7.2417 | 9.95    | 10.9483 | 10.2    | 0.5913 | 3.4     | 0.166  | -0.7418 |
| 4/23/2019 11:25 | 7.0917 | 11.45   | 11.9083 | 11.9167 | 0.5913 | 3.2636  | 0.1423 | -0.7418 |
| 4/23/2019 11:26 | 7.2583 | 11.825  | 12.3283 | 12.7333 | 0.5913 | 2.94    | 0.1562 | -0.7418 |
| 4/23/2019 11:27 | 7.5833 | 11.8667 | 12.4117 | 11.2    | 0.5913 | 2.8     | 0.1387 | -0.7418 |
| 4/23/2019 11:28 | 7.7333 | 12.5333 | 12.7517 | 12.95   | 0.5913 | 2.8     | 0.1334 | -0.7418 |
| 4/23/2019 11:29 | 7.7917 | 12.9167 | 12.72   | 12.6167 | 0.5913 | 2.7833  | 0.1392 | -0.7418 |
| 4/23/2019 11:30 | 7.8167 | 12.5583 | 13.0383 | 12.7    | 0.5913 | 2.7     | 0.1257 | -0.7418 |
| 4/23/2019 11:31 | 8.15   | 14.975  | 15.0983 | 14.4    | 0.5913 | 2.6417  | 0.1216 | -0.7418 |
| 4/23/2019 11:32 | 8.525  | 13.7917 | 14.5817 | 13.5    | 0.5913 | 2.6     | 0.1268 | -0.7418 |
| 4/23/2019 11:33 | 8.8667 | 14.2167 | 14.5633 | 13.8667 | 0.5913 | 2.5727  | 0.1156 | -0.7418 |
| 4/23/2019 11:34 | 9.05   | 14.9667 | 15.63   | 14.3167 | 0.5913 | 2.4455  | 0.1159 | -0.7418 |
| 4/23/2019 11:35 | 9.15   | 14.5333 | 14.7583 | 13.9333 | 0.5913 | 2.3455  | 0.1163 | -0.7418 |
| 4/23/2019 11:36 | 9.5583 | 15.3417 | 15.8    | 15.05   | 0.5913 | 2.2833  | 0.0973 | -0.7418 |

|                 |        |         |         |         |        |        |        |         |
|-----------------|--------|---------|---------|---------|--------|--------|--------|---------|
| 4/23/2019 11:37 | 9.4833 | 14.325  | 14.9383 | 14.95   | 0.5913 | 2.2    | 0.1124 | -0.7418 |
| 4/23/2019 11:38 | 9.6667 | 15.1333 | 15.9067 | 15.6167 | 0.5913 | 2.14   | 0.1226 | -0.7418 |
| 4/23/2019 11:39 | 9.4083 | 14.45   | 14.6433 | 14.0333 | 0.5913 | 2.1    | 0.1999 | -0.7418 |
| 4/23/2019 11:40 | 9.25   | 13.7917 | 13.8833 | 13.5    | 0.5913 | 2.1    | 0.1975 | -0.7418 |
| 4/23/2019 11:41 | 8.9583 | 13.5    | 13.9183 | 13.2833 | 0.5913 | 2.0182 | 0.1733 | -0.7418 |
| 4/23/2019 11:42 | 8.7833 | 13.6833 | 14.5317 | 14.4167 | 0.5913 | 2      | 0.1508 | -0.7418 |
| 4/23/2019 11:43 | 8.9333 | 14.7    | 14.8917 | 14.65   | 0.5913 | 2      | 0.1471 | -0.7418 |
| 4/23/2019 11:44 | 9.0917 | 13.6167 | 14.3533 | 14.2667 | 0.5913 | 2      | 0.1282 | -0.7418 |
| 4/23/2019 11:45 | 9.2    | 13.775  | 14.4433 | 14.3333 | 0.5913 | 2      | 0.1313 | -0.7418 |
| 4/23/2019 11:46 | 9.1    | 14.025  | 14.6917 | 14.05   | 0.5913 | 2      | 0.1332 | -0.7418 |
| 4/23/2019 11:47 | 8.8667 | 12.9917 | 13.7233 | 13.0167 | 0.5913 | 2      | 0.1218 | -0.7418 |
| 4/23/2019 11:48 | 8.6417 | 12.425  | 13.3533 | 12.4833 | 0.5913 | 2      | 0.1363 | -0.7418 |
| 4/23/2019 11:49 | 8.4083 | 13.0917 | 12.9783 | 13.1    | 0.5913 | 2.0818 | 0.1242 | -0.7418 |
| 4/23/2019 11:50 | 8.3667 | 12.7833 | 12.9817 | 12.6167 | 0.5913 | 2.1    | 0.1158 | -0.7418 |
| 4/23/2019 11:51 | 8.3583 | 12.5417 | 12.7883 | 12.95   | 0.5913 | 2.1    | 0.1211 | -0.7418 |
| 4/23/2019 11:52 | 8.3917 | 12.4917 | 12.9533 | 13.5667 | 0.5913 | 2.1273 | 0.108  | -0.7418 |
| 4/23/2019 11:53 | 8.3    | 11.6    | 12.84   | 12.5167 | 0.5913 | 2.2    | 0.116  | -0.7418 |
| 4/23/2019 11:54 | 8.2083 | 12.1833 | 12.6167 | 11.5333 | 0.5913 | 2.2    | 0.1159 | -0.7418 |
| 4/23/2019 11:55 | 7.975  | 12.1333 | 12.3967 | 12.8833 | 0.5913 | 2.21   | 0.1024 | -0.7418 |
| 4/23/2019 11:56 | 7.9417 | 12.0167 | 12.9267 | 12.5333 | 0.5913 | 2.3    | 0.109  | -0.7418 |
| 4/23/2019 11:57 | 8      | 12.0917 | 13.0417 | 12.1833 | 0.5913 | 2.3    | 0.1071 | -0.7418 |
| 4/23/2019 11:58 | 8.1083 | 12.0417 | 13.1317 | 12.5    | 0.5913 | 2.3    | 0.1006 | -0.7418 |
| 4/23/2019 11:59 | 8.1    | 12.2167 | 12.79   | 12.8667 | 0.5913 | 2.3    | 0.107  | -0.7418 |
| 4/23/2019 12:00 | 8.0667 | 11.4083 | 12.8667 | 11.3333 | 0.5913 | 2.3    | 0.0931 | -0.7418 |
| 4/23/2019 12:01 | 7.9    | 12      | 12.0817 | 12.1    | 0.5913 | 2.3    | 0.1045 | -0.7418 |
| 4/23/2019 12:02 | 7.7833 | 11.725  | 12.205  | 11.9833 | 0.5913 | 2.3    | 0.0996 | -0.7418 |
| 4/23/2019 12:03 | 7.7    | 11.5917 | 12.355  | 12.2    | 0.5913 | 2.3    | 0.0881 | -0.7418 |
| 4/23/2019 12:04 | 7.7833 | 12      | 12.4717 | 11.4833 | 0.5913 | 2.3    | 0.1041 | -0.7418 |
| 4/23/2019 12:05 | 7.7    | 11.1083 | 11.665  | 11.0667 | 0.5913 | 2.3    | 0.09   | -0.7418 |
| 4/23/2019 12:06 | 7.5917 | 11.2583 | 11.2017 | 11.6333 | 0.5913 | 2.3583 | 0.0991 | -0.7418 |
| 4/23/2019 12:07 | 7.3417 | 10.75   | 10.8983 | 10.3    | 0.5913 | 2.3333 | 0.1043 | -0.7418 |
| 4/23/2019 12:08 | 7.125  | 10.3583 | 10.9383 | 10.3167 | 0.5913 | 2.4    | 0.0916 | -0.7418 |
| 4/23/2019 12:09 | 6.8667 | 10.0917 | 10.74   | 10.3167 | 0.5913 | 2.4    | 0.0971 | -0.7418 |
| 4/23/2019 12:10 | 6.6    | 8.925   | 10.326  | 10.2833 | 0.5913 | 2.4    | 0.0894 | -0.7418 |
| 4/23/2019 12:11 | 6.3417 | 9.2333  | 10.0202 | 9.2333  | 0.5913 | 2.4    | 0.0826 | -0.7418 |
| 4/23/2019 12:12 | 6.125  | 9.3917  | 9.8228  | 8.8667  | 0.5913 | 2.4    | 0.1026 | -0.7418 |
| 4/23/2019 12:13 | 6.0583 | 8.5167  | 9.5365  | 8.8167  | 0.5913 | 2.4    | 0.0971 | -0.7418 |
| 4/23/2019 12:14 | 6      | 7.9     | 9.2182  | 8.6833  | 0.5913 | 2.4    | 0.0953 | -0.7418 |
| 4/23/2019 12:15 | 5.9333 | 7.5583  | 9.2735  | 8.5     | 0.5913 | 2.4    | 0.1032 | -0.7418 |
| 4/23/2019 12:16 | 5.8083 | 7.8417  | 9.1345  | 8.15    | 0.5913 | 2.4    | 0.0848 | -0.7418 |
| 4/23/2019 12:17 | 5.6833 | 7.4167  | 8.9008  | 8.1167  | 0.5913 | 2.4    | 0.0996 | -0.7418 |
| 4/23/2019 12:18 | 5.5667 | 7.5917  | 8.4978  | 7.3     | 0.5913 | 2.4    | 0.1084 | -0.7418 |
| 4/23/2019 12:19 | 5.4167 | 8.125   | 8.3672  | 7.3667  | 0.5913 | 2.4    | 0.0934 | -0.7418 |
| 4/23/2019 12:20 | 5.2917 | 7.025   | 8.3573  | 7.2667  | 0.5913 | 2.4    | 0.1086 | -0.7418 |
| 4/23/2019 12:21 | 5.1917 | 6.8167  | 8.0865  | 7.5     | 0.5913 | 2.4    | 0.1092 | -0.7418 |
| 4/23/2019 12:22 | 5.1    | 6.8667  | 8.0008  | 6.6     | 0.5913 | 2.4    | 0.0903 | -0.7418 |
| 4/23/2019 12:23 | 5      | 6.3     | 8.0985  | 7.0167  | 0.5913 | 2.4333 | 0.1103 | -0.7418 |

|                 |        |         |         |         |        |         |        |         |
|-----------------|--------|---------|---------|---------|--------|---------|--------|---------|
| 4/23/2019 12:24 | 4.8917 | 6.2083  | 7.4942  | 6.5167  | 0.5913 | 2.5     | 0.0927 | -0.7418 |
| 4/23/2019 12:25 | 4.7583 | 6.5     | 7.4753  | 6.3333  | 0.5913 | 2.5     | 0.1033 | -0.7418 |
| 4/23/2019 12:26 | 4.65   | 5.6333  | 7.3405  | 6.2     | 0.5913 | 2.57    | 0.1059 | -0.7418 |
| 4/23/2019 12:27 | 4.6    | 6.3417  | 7.2202  | 5.2833  | 0.5913 | 2.6     | 0.0963 | -0.7418 |
| 4/23/2019 12:28 | 4.5917 | 5.3667  | 7.15    | 5.7667  | 0.5913 | 2.6667  | 0.114  | -0.7418 |
| 4/23/2019 12:29 | 4.5    | 5.4167  | 6.9953  | 5.35    | 0.5913 | 2.7     | 0.1037 | -0.7418 |
| 4/23/2019 12:30 | 4.3583 | 5.0917  | 6.7352  | 5.3     | 0.5913 | 2.7333  | 0.1111 | -0.7418 |
| 4/23/2019 12:31 | 3.775  | 2.6167  | 6.6238  | 1.8167  | 0.5913 | 4.1545  | 0.2019 | -0.7418 |
| 4/23/2019 12:32 | 2.9167 | 1.4417  | 35.4842 | 2.6333  | 0.5913 | 27.9083 | 0.5753 | -0.7418 |
| 4/23/2019 12:33 | 1.9083 | -0.2167 | 58.4617 | 1.9667  | 0.5913 | 56.6909 | 1.1123 | -0.7418 |
| 4/23/2019 12:34 | 1.2417 | -0.025  | 49.5608 | 1.4     | 0.5913 | 50.3833 | 1.0505 | -0.7418 |
| 4/23/2019 12:35 | 0.9167 | -1.0083 | 57.8375 | 1.0833  | 0.5913 | 55.7818 | 1.2155 | -0.7418 |
| 4/23/2019 12:36 | 0.7583 | -1.05   | 61.515  | 1.5333  | 0.5913 | 57.55   | 1.3872 | -0.7418 |
| 4/23/2019 12:37 | 0.6417 | -0.1667 | 59.2767 | 0.6     | 0.5913 | 53.9182 | 1.3668 | -0.7418 |
| 4/23/2019 12:38 | 0.6    | -0.8167 | 60.2067 | 0.5333  | 0.5913 | 54.5833 | 1.4645 | -0.7418 |
| 4/23/2019 12:39 | 0.6    | -0.4917 | 60.2992 | 0.4167  | 0.5913 | 54.8333 | 1.5495 | -0.7418 |
| 4/23/2019 12:40 | 0.6    | -0.5    | 58.9075 | 0.85    | 0.5913 | 54.625  | 1.5715 | -0.7418 |
| 4/23/2019 12:41 | 0.6    | -1.3417 | 59.0533 | 1.0167  | 0.5913 | 54.8818 | 1.664  | -0.7418 |
| 4/23/2019 12:42 | 0.6    | -0.175  | 58.2108 | 0.4167  | 0.5913 | 54.7636 | 1.6737 | -0.7418 |
| 4/23/2019 12:43 | 0.6    | -0.3083 | 58.0658 | 0.8333  | 0.5913 | 55.39   | 1.7258 | -0.7418 |
| 4/23/2019 12:44 | 0.5917 | -0.35   | 58.57   | 0.9333  | 0.5913 | 54.55   | 1.7802 | -0.7418 |
| 4/23/2019 12:45 | 0.5    | -0.5333 | 59.3917 | 0.8333  | 0.5913 | 54.4667 | 1.8215 | -0.7418 |
| 4/23/2019 12:46 | 0.5    | -0.4667 | 60.2883 | 0.7     | 0.5913 | 54.5    | 1.8763 | -0.7418 |
| 4/23/2019 12:47 | 0.5333 | -0.1417 | 59.6383 | 0.5667  | 0.5913 | 54.6273 | 1.8872 | -0.7418 |
| 4/23/2019 12:48 | 0.6    | 0.0167  | 58.2408 | -0.15   | 0.5913 | 54.7    | 1.8882 | -0.7418 |
| 4/23/2019 12:49 | 0.6    | -0.4167 | 57.3917 | 0.4333  | 0.5913 | 54.7667 | 1.91   | -0.7418 |
| 4/23/2019 12:50 | 0.575  | -0.8167 | 56.2808 | -0.0333 | 0.5913 | 54.8    | 1.898  | -0.7418 |
| 4/23/2019 12:51 | 0.5    | 0.0583  | 55.4758 | 0.5333  | 0.5913 | 54.8    | 1.9093 | -0.7418 |
| 4/23/2019 12:52 | 0.5    | -0.6583 | 54.2075 | 0.95    | 0.5913 | 54.8    | 1.911  | -0.7418 |
| 4/23/2019 12:53 | 0.5    | 0.025   | 53.035  | 0.1833  | 0.5913 | 54.8    | 1.8912 | -0.7418 |
| 4/23/2019 12:54 | 0.5667 | -0.775  | 52.0592 | 0.4833  | 0.5913 | 54.7667 | 1.9217 | -0.7418 |
| 4/23/2019 12:55 | 0.6    | -0.2917 | 51.1292 | 0.8333  | 0.5913 | 54.7    | 1.8947 | -0.7418 |
| 4/23/2019 12:56 | 0.6917 | 0.0667  | 49.8875 | 0.25    | 0.5913 | 54.7    | 1.9055 | -0.7418 |
| 4/23/2019 12:57 | 0.675  | -0.45   | 49.5083 | 1.25    | 0.5913 | 54.5455 | 1.9    | -0.7418 |
| 4/23/2019 12:58 | 0.6167 | -0.3    | 48.5825 | -0.1333 | 0.5913 | 54.4167 | 1.8722 | -0.7418 |
| 4/23/2019 12:59 | 0.6    | -0.5667 | 47.7433 | 0.9333  | 0.5913 | 54.3167 | 1.9012 | -0.7418 |
| 4/23/2019 13:00 | 0.675  | -0.3417 | 47.05   | 0.05    | 0.5913 | 54.15   | 1.8772 | -0.7418 |
| 4/23/2019 13:01 | 0.7    | 0.1167  | 46.6358 | 0.5833  | 0.5913 | 54.0273 | 1.8743 | -0.7418 |
| 4/23/2019 13:02 | 0.7    | 0.425   | 45.9958 | 0.3667  | 0.5913 | 53.8833 | 1.8838 | -0.7418 |
| 4/23/2019 13:03 | 0.65   | 0.175   | 45.1067 | 0.9833  | 0.5913 | 53.6727 | 1.86   | -0.7418 |
| 4/23/2019 13:04 | 0.6    | -0.8333 | 44.4592 | 0.1167  | 0.5913 | 53.5167 | 1.8615 | -0.7418 |
| 4/23/2019 13:05 | 0.6    | -0.3583 | 43.6375 | -0.0667 | 0.5913 | 53.3455 | 1.861  | -0.7418 |
| 4/23/2019 13:06 | 0.6    | 0.125   | 43.22   | 0.6167  | 0.5913 | 53.2333 | 1.8343 | -0.7418 |
| 4/23/2019 13:07 | 0.6    | -0.2083 | 42.7642 | 0.4     | 0.5913 | 53.1083 | 1.8597 | -0.7418 |
| 4/23/2019 13:08 | 0.6    | -0.1583 | 41.9392 | 0.2     | 0.5913 | 52.9455 | 1.8358 | -0.7418 |
| 4/23/2019 13:09 | 0.6    | -0.3417 | 41.5092 | 0.6333  | 0.5913 | 52.82   | 1.8388 | -0.7418 |
| 4/23/2019 13:10 | 0.5833 | -0.2167 | 41.2667 | 0.7333  | 0.5913 | 52.6727 | 1.8188 | -0.7418 |



|                 |        |         |         |         |        |         |        |         |
|-----------------|--------|---------|---------|---------|--------|---------|--------|---------|
| 4/23/2019 13:11 | 0.5    | -0.3583 | 40.8117 | 0.1333  | 0.5913 | 52.4    | 1.8092 | -0.7418 |
| 4/23/2019 13:12 | 0.5    | -0.1083 | 40.2525 | 0.0833  | 0.5913 | 52.1917 | 1.8198 | -0.7418 |
| 4/23/2019 13:13 | 0.5    | 0.6917  | 39.34   | 0.3     | 0.5913 | 52      | 1.7998 | -0.7418 |
| 4/23/2019 13:14 | 0.5    | -0.1833 | 38.6542 | 0.75    | 0.5913 | 51.8583 | 1.7627 | -0.7418 |
| 4/23/2019 13:15 | 0.5    | -0.1    | 38.5417 | 0.2167  | 0.5913 | 51.64   | 1.7732 | -0.7418 |
| 4/23/2019 13:16 | 0.5    | -0.4167 | 37.9558 | 0.6333  | 0.5913 | 51.5167 | 1.7607 | -0.7418 |
| 4/23/2019 13:17 | 0.5    | -0.4    | 37.7192 | 0.6167  | 0.5913 | 51.31   | 1.7637 | -0.7418 |
| 4/23/2019 13:18 | 0.5    | 0.0583  | 37.3575 | 0.4833  | 0.5913 | 51.0364 | 1.7705 | -0.7418 |
| 4/23/2019 13:19 | 0.5    | -0.0917 | 36.8542 | 0.4667  | 0.5913 | 50.8182 | 1.7523 | -0.7418 |
| 4/23/2019 13:20 | 0.4417 | -0.4667 | 36.2608 | 0.1167  | 0.5913 | 50.6455 | 1.7672 | -0.7418 |
| 4/23/2019 13:21 | 0.4083 | -1.0917 | 35.9508 | -0.05   | 0.5913 | 50.4    | 1.7567 | -0.7418 |
| 4/23/2019 13:22 | 0.4    | -0.65   | 35.6558 | 0.2667  | 0.5913 | 50.225  | 1.7512 | -0.7418 |
| 4/23/2019 13:23 | 0.4    | -0.1417 | 35.2733 | 0.0833  | 0.5913 | 49.9909 | 1.749  | -0.7418 |
| 4/23/2019 13:24 | 0.4167 | -0.55   | 34.7642 | 0.0333  | 0.5913 | 49.825  | 1.7383 | -0.7418 |
| 4/23/2019 13:25 | 0.4333 | -0.3917 | 34.4775 | 0.45    | 0.5913 | 49.63   | 1.7363 | -0.7418 |
| 4/23/2019 13:26 | 0.5    | -0.425  | 34.4008 | 0.2     | 0.5913 | 49.4    | 1.7403 | -0.7418 |
| 4/23/2019 13:27 | 0.5    | -0.2917 | 33.6175 | 0.2667  | 0.5913 | 49.1818 | 1.7228 | -0.7418 |
| 4/23/2019 13:28 | 0.5417 | -0.5917 | 33.5133 | 0.1833  | 0.5913 | 49.03   | 1.7223 | -0.7418 |
| 4/23/2019 13:29 | 0.6    | -0.2917 | 33.06   | 0       | 0.5913 | 48.8833 | 1.7    | -0.7418 |
| 4/23/2019 13:30 | 0.5667 | -1      | 32.5158 | 0.1667  | 0.5913 | 48.7636 | 1.7082 | -0.7418 |
| 4/23/2019 13:31 | 0.5    | -0.025  | 32.1933 | 0       | 0.5913 | 48.6    | 1.7067 | -0.7418 |
| 4/23/2019 13:32 | 0.5    | -0.1667 | 31.7633 | 0.4167  | 0.5913 | 48.4273 | 1.6662 | -0.7418 |
| 4/23/2019 13:33 | 0.5    | -0.3333 | 31.7358 | 0.0333  | 0.5913 | 48.26   | 1.6945 | -0.7418 |
| 4/23/2019 13:34 | 0.5    | -0.4083 | 31.3058 | -0.1    | 0.5913 | 48.0818 | 1.6605 | -0.7418 |
| 4/23/2019 13:35 | 0.5333 | -0.6833 | 31.2217 | 0.7833  | 0.5913 | 47.9818 | 1.6832 | -0.7418 |
| 4/23/2019 13:36 | 0.6    | -0.275  | 30.9917 | 0.1667  | 0.5913 | 47.8455 | 1.663  | -0.7418 |
| 4/23/2019 13:37 | 0.6    | -0.7667 | 30.5442 | 0.2167  | 0.5913 | 47.73   | 1.6397 | -0.7418 |
| 4/23/2019 13:38 | 0.6    | 0.0083  | 30.1292 | -0.2667 | 0.5913 | 47.6    | 1.65   | -0.7418 |
| 4/23/2019 13:39 | 0.6    | 0.0083  | 29.8317 | 0.0167  | 0.5913 | 47.44   | 1.6407 | -0.7418 |
| 4/23/2019 13:40 | 0.6    | -0.7583 | 29.48   | 0.2     | 0.5913 | 47.2818 | 1.6392 | -0.7418 |
| 4/23/2019 13:41 | 0.6    | -1.1    | 28.9467 | 0.4667  | 0.5913 | 47.0833 | 1.6163 | -0.7418 |
| 4/23/2019 13:42 | 0.6    | -0.2917 | 28.9158 | -0.15   | 0.5913 | 46.9583 | 1.6047 | -0.7418 |
| 4/23/2019 13:43 | 0.6    | 0.25    | 28.8542 | 0.1167  | 0.5913 | 46.8778 | 1.598  | -0.7418 |
| 4/23/2019 13:44 | 0.6    | 0.075   | 28.4975 | 0.6667  | 0.5913 | 46.6727 | 1.6063 | -0.7418 |
| 4/23/2019 13:45 | 0.55   | -0.725  | 27.8308 | 0.2167  | 0.5913 | 46.5273 | 1.5938 | -0.7418 |
| 4/23/2019 13:46 | 0.6    | 0.0667  | 27.7867 | 0.4167  | 0.5913 | 46.4455 | 1.5732 | -0.7418 |
| 4/23/2019 13:47 | 0.6182 | -0.975  | 27.3675 | 0.5     | 0.5913 | 46.2083 | 1.5682 | -0.7418 |
| 4/23/2019 13:48 | 0.7    | 0.0333  | 27.4425 | -0.2667 | 0.5913 | 46.075  | 1.5795 | -0.7418 |
| 4/23/2019 13:49 | 0.65   | -1.0917 | 27.0467 | 0.1667  | 0.5913 | 45.9273 | 1.5717 | -0.7418 |
| 4/23/2019 13:50 | 0.575  | -0.3417 | 26.5817 | 0       | 0.5913 | 45.8    | 1.5358 | -0.7418 |
| 4/23/2019 13:51 | 0.5    | -0.35   | 26.5992 | -0.2833 | 0.5913 | 45.7083 | 1.5337 | -0.7418 |
| 4/23/2019 13:52 | 0.5917 | -0.0917 | 23.5108 | 0.15    | 0.5913 | 45.45   | 1.4035 | -0.7418 |
| 4/23/2019 13:53 | 0.6167 | -0.625  | 23.9567 | 0.35    | 0.5913 | 45.15   | 1.4188 | -0.7418 |
| 4/23/2019 13:54 | 0.8083 | 0.2333  | 21.0292 | 1.3833  | 0.5913 | 44.4818 | 1.2822 | -0.7418 |
| 4/23/2019 13:55 | 0.9667 | 0.6333  | 18.6125 | 0.4833  | 0.5913 | 43.15   | 1.1712 | -0.7418 |
| 4/23/2019 13:56 | 1.1333 | 0.3083  | 18.1958 | 0.6833  | 0.5913 | 41.8333 | 1.1397 | -0.7418 |
| 4/23/2019 13:57 | 1.1833 | 0.6667  | 16.5817 | 1.0667  | 0.5913 | 40.475  | 1.0643 | -0.7418 |

|                 |        |         |         |         |        |         |        |         |
|-----------------|--------|---------|---------|---------|--------|---------|--------|---------|
| 4/23/2019 13:58 | 1.225  | 1.2     | 14.4408 | 0.7333  | 0.5913 | 38.6917 | 0.9789 | -0.7418 |
| 4/23/2019 13:59 | 1.3917 | 1.1083  | 12.3242 | 1.5167  | 0.5913 | 36.4545 | 0.8667 | -0.7418 |
| 4/23/2019 14:00 | 1.65   | 2.675   | 11.015  | 2.4167  | 0.5913 | 33.9833 | 0.7596 | -0.7418 |
| 4/23/2019 14:01 | 1.9667 | 2.8083  | 10.2986 | 2.0167  | 0.5913 | 31.2667 | 0.7127 | -0.7418 |
| 4/23/2019 14:02 | 2.1917 | 2.6083  | 9.8951  | 3       | 0.5913 | 28.76   | 0.6857 | -0.7418 |
| 4/23/2019 14:03 | 2.2333 | 1.95    | 9.4067  | 2.2     | 0.5913 | 25.77   | 0.6701 | -0.7418 |
| 4/23/2019 14:04 | 2.3167 | 3.05    | 8.9995  | 3.3     | 0.5913 | 23.0909 | 0.6138 | -0.7418 |
| 4/23/2019 14:05 | 2.5167 | 3.8333  | 8.5257  | 4.2     | 0.5913 | 20.1909 | 0.5502 | -0.7418 |
| 4/23/2019 14:06 | 2.8083 | 3.4583  | 8.2282  | 3.85    | 0.5913 | 17.5    | 0.525  | -0.7418 |
| 4/23/2019 14:07 | 3.1    | 4.675   | 7.998   | 4.6167  | 0.5913 | 15.3546 | 0.4859 | -0.7418 |
| 4/23/2019 14:08 | 3.4083 | 5.475   | 8.0565  | 5.4667  | 0.5913 | 13.3417 | 0.4298 | -0.7418 |
| 4/23/2019 14:09 | 3.85   | 6.2833  | 7.6437  | 5.5     | 0.5913 | 11.4273 | 0.3965 | -0.7418 |
| 4/23/2019 14:10 | 4.1583 | 6.15    | 8.0628  | 6.1667  | 0.5913 | 9.7727  | 0.3773 | -0.7418 |
| 4/23/2019 14:11 | 4.3917 | 6.5833  | 8.3385  | 6.6333  | 0.5913 | 8.46    | 0.3397 | -0.7418 |
| 4/23/2019 14:12 | 4.5    | 6.1333  | 8.4942  | 7.2667  | 0.5913 | 7.47    | 0.3443 | -0.7418 |
| 4/23/2019 14:13 | 4.725  | 7.9583  | 8.7372  | 7.2667  | 0.5913 | 6.65    | 0.3052 | -0.7418 |
| 4/23/2019 14:14 | 5.025  | 8.3333  | 8.9753  | 8.2667  | 0.5913 | 5.9727  | 0.2864 | -0.7418 |
| 4/23/2019 14:15 | 5.325  | 7.575   | 9.2395  | 8.2167  | 0.5913 | 5.3273  | 0.2837 | -0.7418 |
| 4/23/2019 14:16 | 5.5667 | 8.0917  | 9.3892  | 8.65    | 0.5913 | 4.7545  | 0.2637 | -0.7418 |
| 4/23/2019 14:17 | 5.7909 | 9.7333  | 9.8997  | 9.6167  | 0.5913 | 4.3083  | 0.25   | -0.7418 |
| 4/23/2019 14:18 | 6.1167 | 9.8167  | 10.0985 | 9.8167  | 0.5913 | 3.8917  | 0.2288 | -0.7418 |
| 4/23/2019 14:19 | 6.4333 | 10.5583 | 10.5683 | 9.7667  | 0.5913 | 3.5909  | 0.2177 | -0.7418 |
| 4/23/2019 14:20 | 6.6833 | 10.8083 | 10.6733 | 10.7167 | 0.5913 | 3.3545  | 0.2139 | -0.7418 |
| 4/23/2019 14:21 | 6.8083 | 11      | 10.7    | 10.4833 | 0.5913 | 3.1917  | 0.1959 | -0.7418 |
| 4/23/2019 14:22 | 6.9667 | 10.2583 | 10.9083 | 11.25   | 0.5913 | 3.0273  | 0.1971 | -0.7418 |
| 4/23/2019 14:23 | 7.0917 | 11.625  | 11.1633 | 11.0333 | 0.5913 | 2.925   | 0.178  | -0.7418 |
| 4/23/2019 14:24 | 7.2667 | 11.0167 | 11.2767 | 10.75   | 0.5913 | 2.8364  | 0.1728 | -0.7418 |
| 4/23/2019 14:25 | 7.3167 | 10.9    | 10.8517 | 10.75   | 0.5913 | 2.725   | 0.1797 | -0.7418 |
| 4/23/2019 14:26 | 7.4583 | 11.9333 | 11.6833 | 11.6167 | 0.5913 | 2.7     | 0.1614 | -0.7418 |
| 4/23/2019 14:27 | 7.5167 | 11.2    | 11.6083 | 11.4667 | 0.5913 | 2.6083  | 0.1628 | -0.7418 |
| 4/23/2019 14:28 | 7.6333 | 11.8833 | 11.8883 | 11.5667 | 0.5913 | 2.5545  | 0.1576 | -0.7418 |
| 4/23/2019 14:29 | 7.7    | 12.2083 | 12.17   | 11.9333 | 0.5913 | 2.5     | 0.1453 | -0.7418 |
| 4/23/2019 14:30 | 7.8    | 11.7167 | 11.81   | 12.1    | 0.5913 | 2.5     | 0.1546 | -0.7418 |
| 4/23/2019 14:31 | 7.9    | 11.8    | 11.975  | 12.1333 | 0.5913 | 2.5     | 0.1281 | -0.7418 |
| 4/23/2019 14:32 | 7.9167 | 11.8583 | 11.2367 | 11.9    | 0.5913 | 2.4     |        | -0.7418 |
| 4/23/2019 14:33 | 8.1    | 12.575  | 12.0833 | 12.8667 | 0.5913 | 2.38    |        | -0.7418 |
| 4/23/2019 14:34 | 8.3417 | 13.0667 | 11.7483 | 13.05   | 0.5913 | 2.3     |        | -0.7418 |
| 4/23/2019 14:35 | 8.55   | 11.975  | 12.6633 | 12.1833 | 0.5913 | 2.23    |        | -0.7418 |
| 4/23/2019 14:36 | 8.6    | 12.5417 | 11.685  | 12.6667 | 0.5913 | 2.1917  |        | -0.7418 |
| 4/23/2019 14:37 | 8.5    | 12.8167 | 12.3417 | 13.0167 | 0.5913 | 2.1     |        | -0.7418 |
| 4/23/2019 14:38 | 8.65   | 13.575  | 12.4867 | 13.4667 | 0.5913 | 2.1     |        | -0.7418 |
| 4/23/2019 14:39 | 8.9083 | 14.1833 | 12.4    | 13.9167 | 0.5913 | 2.0818  |        | -0.7418 |
| 4/23/2019 14:40 | 9.1583 | 13.5667 | 13.2    | 13.9167 | 0.5913 | 2.1833  |        | -0.7418 |
| 4/23/2019 14:41 | 9.2    | 14.4333 | 12.985  | 13.8    | 0.5913 | 2.2     |        | -0.7418 |
| 4/23/2019 14:42 | 9.2    | 13.5    | 13.3133 | 13.9333 | 0.5913 | 2.175   |        | -0.7418 |
| 4/23/2019 14:43 | 9.2583 | 14.2667 | 13.87   | 14.3667 | 0.5913 | 2.1     |        | -0.7418 |
| 4/23/2019 14:44 | 9.3    | 13.6167 | 13.5233 | 13.5    | 0.5913 | 2.1     |        | -0.7418 |

|                 |         |         |         |         |        |        |         |
|-----------------|---------|---------|---------|---------|--------|--------|---------|
| 4/23/2019 14:45 | 9.225   | 13.275  | 12.92   | 13.4    | 0.5913 | 2.1    | -0.7418 |
| 4/23/2019 14:46 | 9.2     | 13.8333 | 12.4183 | 13.95   | 0.5913 | 2.1    | -0.7418 |
| 4/23/2019 14:47 | 9.2667  | 14.2583 | 12.9967 | 14.3167 | 0.5913 | 2.15   | -0.7418 |
| 4/23/2019 14:48 | 9.375   | 13.2333 | 13.2717 | 13.9167 | 0.5913 | 2.2636 | -0.7418 |
| 4/23/2019 14:49 | 9.4083  | 14.2833 | 13.3983 | 14.0833 | 0.5913 | 2.3    | -0.7418 |
| 4/23/2019 14:50 | 9.55    | 13.925  | 14.5467 | 14.4333 | 0.5913 | 2.3    | -0.7418 |
| 4/23/2019 14:51 | 9.6583  | 14.4583 | 13.4317 | 14.6333 | 0.5913 | 2.3    | -0.7418 |
| 4/23/2019 14:52 | 9.8     | 14.825  | 13.8217 | 14.6833 | 0.5913 | 2.1667 | -0.7418 |
| 4/23/2019 14:53 | 9.8083  | 13.9917 | 12.795  | 14.1333 | 0.5913 | 2.1667 | -0.7418 |
| 4/23/2019 14:54 | 9.725   | 13.95   | 13.5483 | 13.95   | 0.5913 | 2.2    | -0.7418 |
| 4/23/2019 14:55 | 9.7583  | 14.675  | 13.815  | 14.8    | 0.5913 | 2.2    | -0.7418 |
| 4/23/2019 14:56 | 9.9417  | 14.0333 | 14.64   | 14.95   | 0.5913 | 2.1583 | -0.7418 |
| 4/23/2019 14:57 | 10.175  | 15.325  | 14.4033 | 15.5333 | 0.5913 | 2.3    | -0.7418 |
| 4/23/2019 14:58 | 10.3    | 14.3667 | 13.325  | 14.8667 | 0.5913 | 2.2917 | -0.7418 |
| 4/23/2019 14:59 | 10.2417 | 15.4167 | 14.5033 | 15.1    | 0.5913 | 2.2    | -0.7418 |
| 4/23/2019 15:00 | 10.15   | 13.8917 | 14.3483 | 14.4667 | 0.5913 | 2.1091 | -0.7418 |
| 4/23/2019 15:01 | 9.9917  | 14.2917 | 14.5883 | 13.7833 | 0.5913 | 2.0833 | -0.7418 |
| 4/23/2019 15:02 | 9.7667  | 13.5583 | 14.245  | 14.2667 | 0.5913 | 2      | -0.7418 |
| 4/23/2019 15:03 | 9.5083  | 13.3583 | 13.8    | 13.5333 | 0.5913 | 2      | -0.7418 |
| 4/23/2019 15:04 | 9.2083  | 11.6    | 11.7817 | 12.2667 | 0.5913 | 2      | -0.7418 |
| 4/23/2019 15:05 | 8.7167  | 10.8583 | 11.9667 | 10.95   | 0.5913 | 2      | -0.7418 |
| 4/23/2019 15:06 | 8.0917  | 9.925   | 11.275  | 10.5667 | 0.5913 | 2      | -0.7418 |
| 4/23/2019 15:07 | 7.6167  | 11.075  | 10.8462 | 10.8167 | 0.5913 | 2      | -0.7418 |
| 4/23/2019 15:08 | 7.4083  | 10.5083 | 9.7707  | 10.6833 | 0.5913 | 2.2167 | -0.7418 |
| 4/23/2019 15:09 | 7.325   | 8.95    | 10.89   | 9.7833  | 0.5913 | 2.1182 | -0.7418 |
| 4/23/2019 15:10 | 7.1417  | 10.1167 | 11.2567 | 9.1167  | 0.5913 | 2.19   | -0.7418 |
| 4/23/2019 15:11 | 6.8417  | 9.0583  | 10.092  | 8.7333  | 0.5913 | 2.225  | -0.7418 |
| 4/23/2019 15:12 | 6.5583  | 8.375   | 9.9532  | 8.05    | 0.5913 | 2.4273 | -0.7418 |
| 4/23/2019 15:13 | 6.55    | 9.1833  | 10.6933 | 9.7667  | 0.5913 | 2.5    | -0.7418 |
| 4/23/2019 15:14 | 6.6167  | 10.1083 | 10.4903 | 9.15    | 0.5913 | 2.5    | -0.7418 |
| 4/23/2019 15:15 | 6.7333  | 9.4417  | 8.7685  | 9.6833  | 0.5913 | 2.5091 | -0.7418 |
| 4/23/2019 15:16 | 6.3917  | 7.5417  | 8.8198  | 8.2167  | 0.5913 | 2.6    | -0.7418 |
| 4/23/2019 15:17 | 5.9083  | 7.05    | 8.8732  | 7.2167  | 0.5913 | 2.6417 | -0.7418 |
| 4/23/2019 15:18 | 5.8583  | 9.4     | 10.3045 | 9.5     | 0.5913 | 2.7    | -0.7418 |
| 4/23/2019 15:19 | 5.925   | 7.3917  | 9.2095  | 7.3167  | 0.5913 | 2.7    | -0.7418 |
| 4/23/2019 15:20 | 6.0083  | 7.4833  | 8.6157  | 7.5833  | 0.5913 | 2.69   | -0.7418 |
| 4/23/2019 15:21 | 5.75    | 7.3583  | 8.7847  | 8.1333  | 0.5913 | 2.6    | -0.7418 |
| 4/23/2019 15:22 | 5.6583  | 6.8667  | 9.28    | 6.8167  | 0.5913 | 2.6091 | -0.7418 |
| 4/23/2019 15:23 | 5.7     | 8.4333  | 9.0562  | 8.1667  | 0.5913 | 2.7    | -0.7418 |
| 4/23/2019 15:24 | 6.1167  | 9.55    | 10.755  | 9.3667  | 0.5913 | 2.6182 | -0.7418 |
| 4/23/2019 15:25 | 6.35    | 8.5917  | 10.5447 | 8.4333  | 0.5913 | 2.575  | -0.7418 |
| 4/23/2019 15:26 | 6.5167  | 7.7     | 8.9315  | 7.9667  | 0.5913 | 2.6    | -0.7418 |
| 4/23/2019 15:27 | 6.15    | 7.9917  | 8.4495  | 7.5333  | 0.5913 | 2.6    | -0.7418 |
| 4/23/2019 15:28 | 5.8833  | 6.7667  | 9.1303  | 7.1     | 0.5913 | 2.6818 | -0.7418 |
| 4/23/2019 15:29 | 5.6167  | 7.175   | 8.4558  | 6.8     | 0.5913 | 2.8    | -0.7418 |
| 4/23/2019 15:30 | 5.525   | 6.6583  | 9.0732  | 6.7167  | 0.5913 | 2.8    | -0.7418 |
| 4/23/2019 15:31 | 5.4     | 6.3833  | 8.7525  | 6.3333  | 0.5913 | 2.8917 | -0.7418 |

|                 |        |        |        |        |        |        |                |
|-----------------|--------|--------|--------|--------|--------|--------|----------------|
| 4/23/2019 15:32 | 5.2667 | 7.05   | 7.575  | 6.7    | 0.5913 | 2.9    | -0.7418        |
| 4/23/2019 15:33 | 5.1083 | 5.5833 | 6.7528 | 6.1833 | 0.5913 | 2.9    | -0.7418        |
| 4/23/2019 15:34 | 4.8833 | 6.4833 | 8.0472 | 6.0167 | 0.5913 | 2.9    | -0.7418        |
| 4/23/2019 15:35 | 4.7417 | 5.6583 | 7.5125 | 5.2667 | 0.5913 | 2.9    | -0.7418        |
| 4/23/2019 15:36 | 4.6417 | 5.3833 | 8.2221 | 5.2    | 0.5913 | 3      | -0.7418        |
| 4/23/2019 15:37 | 4.5667 | 5.4667 | 7.3979 | 5.2333 | 0.5913 | 3.05   | -0.7418        |
| 4/23/2019 15:38 | 4.375  | 4.7917 | 7.227  | 5.0667 | 0.5913 | 3.1    | -0.7418        |
| 4/23/2019 15:39 | 4.25   | 4.9417 | 7.8572 | 4.75   | 0.5913 | 3.175  | -0.7418        |
| 4/23/2019 15:40 | 4.125  | 4.6833 | 7.6926 | 4.8833 | 0.5913 | 3.2    | -0.7418        |
| 4/23/2019 15:41 | 3.9833 | 4.1333 | 7.4794 | 4.2333 | 0.5913 | 3.2    | -0.7418        |
| 4/23/2019 15:42 | 3.85   | 4.625  | 7.2158 | 4.2333 | 0.5913 | 3.2    | -0.7418        |
| 4/23/2019 15:43 | 3.7667 | 4.1333 | 6.9845 | 4.7667 | 0.5913 | 3.2    | -0.7418        |
| 4/23/2019 15:44 | 3.6417 | 4.3083 | 6.8188 | 4.5    | 0.5913 | 3.2727 | -0.7418        |
| 4/23/2019 15:45 | 3.5333 | 4.2917 | 6.5099 | 3.15   | 0.5913 | 3.3    | -0.7418        |
| 4/23/2019 15:46 | 3.3417 | 4.075  | 6.0368 | 3.6667 | 0.5913 | 3.3167 | -0.7418        |
| 4/23/2019 15:47 | 3.2417 | 3.6333 | 5.3822 | 3.2333 | 0.5913 | 3.4    | -0.7418        |
| 4/23/2019 15:48 | 3.15   | 3.925  | 6.3048 | 3.0833 | 0.5913 | 3.4    | -0.7418        |
| 4/23/2019 15:49 | 3.0833 | 3.5917 | 6.583  | 2.9833 | 0.5913 | 3.4    | -0.7418        |
| 4/23/2019 15:50 | 3      | 2.7833 | 6.3784 | 3.2667 | 0.5913 | 3.4    | -0.7418        |
| 4/23/2019 15:51 | 2.9333 | 3.1917 | 5.8537 | 3.35   | 0.5913 | 3.4    | -0.7418        |
| 4/23/2019 15:52 | 2.8083 | 2.3917 | 6.0978 | 3      | 0.5913 | 3.4833 | -0.7418        |
| 4/23/2019 15:53 | 2.8    | 2.425  | 5.9439 | 3.3    | 0.5913 | 3.5    | -0.7418        |
| 4/23/2019 15:54 | 2.7    | 2.9833 | 5.7596 | 2.7833 | 0.5913 | 3.5    | -0.7418        |
| 4/23/2019 15:55 | 2.5667 | 2.1917 | 5.806  | 2.7833 | 0.5913 | 3.6    | -0.7418        |
| 4/23/2019 15:56 | 2.5    | 2.3333 | 5.9537 | 2.1667 | 0.5913 | 3.6    | -0.7418        |
| 4/23/2019 15:57 | 2.45   | 2.1917 | 4.71   | 2.7    | 0.5913 | 3.6364 | -0.7418        |
| 4/23/2019 15:58 | 2.4    | 2.1667 | 5.7031 | 2.1667 | 0.5913 | 3.7    | -0.7418        |
| 4/23/2019 15:59 | 2.3583 | 2.775  | 5.7555 | 2.9333 | 0.5913 | 3.7364 | -0.7418        |
| 4/23/2019 16:00 | 2.3    | 2.275  | 5.8696 | 2.25   | 0.5913 | 3.8182 | -0.7418        |
| 4/23/2019 16:01 | 2.2333 | 2.1333 | 5.334  | 2.7667 | 0.5913 | 3.9    | -0.7418        |
| 4/23/2019 16:02 | 2.1417 | 2.05   | 5.5484 | 2.2833 | 0.5913 | 3.9917 | -0.7418        |
| 4/23/2019 16:03 | 2.0833 | 2.0333 | 5.2823 | 1.1667 | 0.5913 | 4.02   | -0.7418        |
| 4/23/2019 16:04 | 2.0167 | 1.1917 | 5.1766 | 1.3333 | 0.5913 | 4.1    | -0.7418        |
| 4/23/2019 16:05 | 2      |        | 5.3735 | 1.8667 | 0.5913 | 4.1167 | -0.7418        |
| 4/23/2019 16:06 | 1.9667 | 1.975  | 4.9286 | 2.15   | 0.5913 | 4.2    | -0.7418        |
| 4/23/2019 16:07 | 1.9167 | 1.7917 | 5.273  | 1.55   | 0.5913 | 4.2417 | -0.7418        |
| 4/23/2019 16:08 | 1.9    | 1.1667 | 5.4598 | 1.35   | 0.5913 | 4.3    | -0.7418        |
| 4/23/2019 16:09 | 1.8917 | 1.325  | 5.1684 | 1.2    | 0.5913 | 4.3    | -0.7418        |
| 4/23/2019 16:10 | 1.8583 |        | 4.8818 | 1.2333 | 0.5913 | 4.3182 | -0.7418        |
| 4/23/2019 16:11 | 1.8    | 4.025  | 5.0982 | 1.0833 | 0.5913 | 4.4    | -0.7418        |
| 4/23/2019 16:12 | 1.8    | 0.5417 | 4.9748 | 1.5667 | 0.5913 | 4.4    | -0.7418        |
| 4/23/2019 16:13 | 1.775  | 1.05   | 5.0288 | 1.1833 | 0.5913 | 4.4    | 0.1545 -0.7418 |
| 4/23/2019 16:14 | 1.7083 |        | 4.9928 | 1.0833 | 0.5913 | 4.4    | 0.1641 -0.7418 |
| 4/23/2019 16:15 | 1.7    | 3.05   | 4.8298 | 1.2333 | 0.5913 | 4.4    | 0.1822 -0.7418 |
| 4/23/2019 16:16 | 1.7    | 1.225  | 5.0973 | 1.1833 | 0.5913 | 4.4    | 0.1706 -0.7418 |
| 4/23/2019 16:17 | 1.6417 | 1.1167 | 4.8928 | 0.7333 | 0.5913 | 4.4    | 0.1872 -0.7418 |
| 4/23/2019 16:18 | 1.6    | 1.2667 | 4.9465 | 1.2167 | 0.5913 | 4.45   | 0.1802 -0.7418 |

|                 |        |         |        |        |        |        |        |         |
|-----------------|--------|---------|--------|--------|--------|--------|--------|---------|
| 4/23/2019 16:19 | 1.6    | 2.9167  | 4.8318 | 1.0333 | 0.5913 | 4.5    | 0.1779 | -0.7418 |
| 4/23/2019 16:20 | 1.5333 |         | 4.9818 | 0.6333 | 0.5913 | 4.5    | 0.1851 | -0.7418 |
| 4/23/2019 16:21 | 1.5    |         | 4.8997 | 0.9667 | 0.5913 | 4.5091 | 0.1731 | -0.7418 |
| 4/23/2019 16:22 | 1.5    |         | 4.7568 | 0.8167 | 0.5913 | 4.7182 | 0.1854 | -0.7418 |
| 4/23/2019 16:23 | 1.5    |         | 4.439  | 0.3833 | 0.5913 | 4.8    | 0.1841 | -0.7418 |
| 4/23/2019 16:24 | 1.5    |         | 4.5516 | 1.0833 | 0.5913 | 5.125  | 0.1732 | -0.7418 |
| 4/23/2019 16:25 | 1.4417 |         | 4.6257 | 1.3167 | 0.5913 | 5.3818 | 0.1847 | -0.7418 |
| 4/23/2019 16:26 | 1.3833 |         | 4.6821 | 0.5667 | 0.5913 | 5.4167 | 0.1823 | -0.7418 |
| 4/23/2019 16:27 | 1.3833 |         | 4.3679 | 0.4833 | 0.5913 | 5.575  | 0.1822 | -0.7418 |
| 4/23/2019 16:28 | 1.3667 |         | 4.4693 | 0.5833 | 0.5913 | 5.8182 | 0.1836 | -0.7418 |
| 4/23/2019 16:29 | 1.4    |         | 4.3731 | 0.7333 | 0.5913 | 6.2636 | 0.1702 | -0.7418 |
| 4/23/2019 16:30 | 1.4    |         | 4.3312 | 0.6167 | 0.5913 | 6.32   | 0.184  | -0.7418 |
| 4/23/2019 16:31 | 1.4    |         | 4.2408 | 0.4833 | 0.5913 | 6.475  | 0.1814 | -0.7418 |
| 4/23/2019 16:32 | 1.4    |         | 4.2152 | 0.85   | 0.5913 | 6.52   | 0.1776 | -0.7418 |
| 4/23/2019 16:33 | 1.3833 |         | 4.5658 | -0.05  | 0.5913 | 7.1091 | 0.186  | -0.7418 |
| 4/23/2019 16:34 | 1.4    |         | 4.7637 | 0.9333 | 0.5913 | 7.175  | 0.172  | -0.7418 |
| 4/23/2019 16:35 | 1.4083 |         | 4.8483 | 0.8167 | 0.5913 | 7.7818 | 0.1856 | -0.7418 |
| 4/23/2019 16:36 | 1.5417 |         | 4.8473 | 1.15   | 0.5913 | 7.7    | 0.1751 | -0.7418 |
| 4/23/2019 16:37 | 1.6167 |         | 4.5923 | 1.5167 | 0.5913 | 7.5545 | 0.1816 | -0.7418 |
| 4/23/2019 16:38 | 1.7    |         | 4.9159 | 0.8    | 0.5913 | 7.7    | 0.1846 | -0.7418 |
| 4/23/2019 16:39 | 1.7    |         | 4.8989 | 0.9833 | 0.5913 | 7.5364 | 0.1696 | -0.7418 |
| 4/23/2019 16:40 | 1.7    | 1.0429  | 4.6081 | 1.5    | 0.5913 | 7.3    | 0.1873 | -0.7418 |
| 4/23/2019 16:41 | 1.65   | 1.1429  | 4.4226 | 0.7667 | 0.5913 | 6.9    | 0.1783 | -0.7418 |
| 4/23/2019 16:42 | 1.6    | 0.8091  | 4.499  | 1.1333 | 0.5913 | 6.7364 | 0.1778 | -0.7418 |
| 4/23/2019 16:43 | 1.5583 | 0.5     | 4.4483 | 1.1167 | 0.5913 | 6.6583 | 0.1898 | -0.7418 |
| 4/23/2019 16:44 | 1.475  | 1.2667  | 4.521  | 1.2667 | 0.5913 | 6.6091 | 0.1755 | -0.7418 |
| 4/23/2019 16:45 | 1.3667 | 0.7667  | 4.3143 | 0.5167 | 0.5913 | 6.6417 | 0.1896 | -0.7418 |
| 4/23/2019 16:46 | 1.25   | 0.9167  | 4.1352 | 0.4667 | 0.5913 | 6.55   | 0.1868 | -0.7418 |
| 4/23/2019 16:47 | 1.2    | 0.8167  | 4.4888 | 0.5167 | 0.5913 | 6.3455 | 0.1704 | -0.7418 |
| 4/23/2019 16:48 | 1.2    | 0.95    | 4.4008 | 0.85   | 0.5913 | 6.0167 | 0.191  | -0.7418 |
| 4/23/2019 16:49 | 1.2    | 0.7667  | 4.2657 | 0.2167 | 0.5913 | 5.9727 | 0.1713 | -0.7418 |
| 4/23/2019 16:50 | 1.2    | 0.4667  | 4.4418 | 0.25   | 0.5913 | 5.7    | 0.186  | -0.7418 |
| 4/23/2019 16:51 | 1.2    | 0.4333  | 4.2055 | 0.5167 | 0.5913 | 5.7    | 0.1851 | -0.7418 |
| 4/23/2019 16:52 | 1.2    | 0.3833  | 4.1218 | 0.85   | 0.5913 | 5.7909 | 0.1799 | -0.7418 |
| 4/23/2019 16:53 | 1.1333 | 0.6     | 4.4374 | 0.1    | 0.5913 | 5.8    | 0.1949 | -0.7418 |
| 4/23/2019 16:54 | 1.1    | -0.6667 | 4.2367 | 0.2167 | 0.5913 | 5.8273 | 0.1749 | -0.7418 |
| 4/23/2019 16:55 | 1.0083 | -0.1833 | 4.3138 | 0.2167 | 0.5913 | 5.8091 | 0.183  | -0.7418 |
| 4/23/2019 16:56 | 1      | 0.2167  | 4.2137 | 0.3    | 0.5913 | 5.8818 | 0.1807 | -0.7418 |
| 4/23/2019 16:57 | 0.9333 | 0.2333  | 4.2541 | 0.2833 | 0.5913 | 5.4545 | 0.1846 | -0.7418 |
| 4/23/2019 16:58 | 0.9    | -0.15   | 4.0353 | 0.2167 | 0.5913 | 5.3667 | 0.1887 | -0.7418 |
| 4/23/2019 16:59 | 0.9    | -0.2    | 4.3206 | 0.35   | 0.5913 | 5.0182 | 0.1719 | -0.7418 |
| 4/23/2019 17:00 | 0.9333 | 0.7833  | 4.2823 | 0.2    | 0.5913 | 5      | 0.1953 | -0.7418 |
| 4/23/2019 17:01 | 1      | 0.6167  | 4.3168 | 0.6667 | 0.5913 | 5      | 0.1827 | -0.7418 |
| 4/23/2019 17:02 | 1      | 0.45    | 4.2527 | 0.5333 | 0.5913 | 5      | 0.1856 | -0.7418 |
| 4/23/2019 17:03 | 1      | 0.9     | 4.2863 | 0.0167 | 0.5913 | 4.95   | 0.1877 | -0.7418 |
| 4/23/2019 17:04 | 1      | 0.3833  | 4.0777 | 0.4833 | 0.5913 | 4.9727 | 0.1783 | -0.7418 |
| 4/23/2019 17:05 | 1.025  | -0.0167 | 4.1878 | 0.55   | 0.5913 | 4.94   | 0.1817 | -0.7418 |

|                 |        |         |        |         |        |        |        |         |
|-----------------|--------|---------|--------|---------|--------|--------|--------|---------|
| 4/23/2019 17:06 | 1.0167 | 0.7167  | 4.1608 | 0.1667  | 0.5913 | 4.9    | 0.186  | -0.7418 |
| 4/23/2019 17:07 | 1      | -0.3833 | 4.0018 | 0.2     | 0.5913 | 5      | 0.1685 | -0.7418 |
| 4/23/2019 17:08 | 1      | -0.05   | 4.1855 | 0.3333  | 0.5913 | 5      | 0.1871 | -0.7418 |
| 4/23/2019 17:09 | 1      | 0.4167  | 4.0942 | 0.0333  | 0.5913 | 4.97   | 0.1762 | -0.7418 |
| 4/23/2019 17:10 | 1      | -0.25   | 4.3432 | 1       | 0.5913 | 5      | 0.1816 | -0.7418 |
| 4/23/2019 17:11 | 1      | -0.0667 | 3.9515 | 0.1833  | 0.5913 | 4.9    | 0.1757 | -0.7418 |
| 4/23/2019 17:12 | 1      | -0.8833 | 3.9838 | 0.2833  | 0.5913 | 4.9    | 0.1678 | -0.7418 |
| 4/23/2019 17:13 | 1      | -0.25   | 3.8118 | 0.15    | 0.5913 | 4.9    | 0.1842 | -0.7418 |
| 4/23/2019 17:14 | 0.9833 | 0.3833  | 4.0082 | 0.0833  | 0.5913 | 4.9    | 0.1684 | -0.7418 |
| 4/23/2019 17:15 | 0.9    | -0.65   | 4.3023 | -0.15   | 0.5913 | 4.9545 | 0.1792 | -0.7418 |
| 4/23/2019 17:16 | 0.8917 | 0.0333  | 4.1433 | 0.2167  | 0.5913 | 5      | 0.1852 | -0.7418 |
| 4/23/2019 17:17 | 0.9    | -0.2667 | 4.089  | 0.2667  | 0.5913 | 5      | 0.1737 | -0.7418 |
| 4/23/2019 17:18 | 0.9833 | -0.2333 | 4.3043 | 0.05    | 0.5913 | 5      | 0.1799 | -0.7418 |
| 4/23/2019 17:19 | 1      | -0.2    | 4.2135 | 0.6333  | 0.5913 | 5      | 0.1779 | -0.7418 |
| 4/23/2019 17:20 | 1      | 0.7167  | 4.2232 | -0.0667 | 0.5913 | 5.0273 | 0.1752 | -0.7418 |
| 4/23/2019 17:21 | 1      | 0.0833  | 4.2267 | 0.3667  | 0.5913 | 5.1    | 0.1855 | -0.7418 |
| 4/23/2019 17:22 | 1      | -0.3667 | 4.0078 | -0.0167 | 0.5913 | 5.1    | 0.1692 | -0.7418 |
| 4/23/2019 17:23 | 1      | 0.1833  | 4.2017 | 0.25    | 0.5913 | 5.1    | 0.1757 | -0.7418 |
| 4/23/2019 17:24 | 1      | 0.5     | 4.1065 | 0.1167  | 0.5913 | 5.1    | 0.1781 | -0.7418 |
| 4/23/2019 17:25 | 1      | 0.15    | 4.2975 | 0.2833  | 0.5913 | 5.1909 | 0.1708 | -0.7418 |
| 4/23/2019 17:26 | 1.05   | -0.3167 | 4.397  | 0.3833  | 0.5913 | 5.2    | 0.1791 | -0.7418 |
| 4/23/2019 17:27 | 1.0333 | -0.6333 | 3.8762 | 0.0333  | 0.5913 | 5.2    | 0.1732 | -0.7418 |
| 4/23/2019 17:28 | 0.9417 | -0.05   | 3.9153 | -0.2333 | 0.5913 | 5.2    | 0.181  | -0.7418 |
| 4/23/2019 17:29 | 0.9    | 0.0333  | 4.1402 | -0.3    | 0.5913 | 5.2    | 0.183  | -0.7418 |
| 4/23/2019 17:30 | 0.9    | 0.2333  | 4.1333 | -0.5167 | 0.5913 | 5.2    | 0.1657 | -0.7418 |
| 4/23/2019 17:31 | 0.975  | 0.45    | 4.3062 | 0.0333  | 0.5913 | 5.2167 | 0.1844 | -0.7418 |
| 4/23/2019 17:32 | 1      | 0.15    | 4.1718 | 0.05    | 0.5913 | 5.275  | 0.1684 | -0.7418 |
| 4/23/2019 17:33 | 1      | -0.15   | 3.8513 | 0.1     | 0.5913 | 5.2091 | 0.1771 | -0.7418 |
| 4/23/2019 17:34 | 1.0167 | 0.6667  | 4.1328 | -0.3667 | 0.5913 | 5.2182 | 0.1716 | -0.7418 |
| 4/23/2019 17:35 | 1.0083 | 0.05    | 4.1642 | -0.3    | 0.5913 | 5.2    | 0.1676 | -0.7418 |
| 4/23/2019 17:36 | 1      | -0.1167 | 4.1022 | 0.1667  | 0.5913 | 5.2182 | 0.1836 | -0.7418 |
| 4/23/2019 17:37 | 1      | 0.05    | 3.8973 | -0.3333 | 0.5913 | 5.2    | 0.1701 | -0.7418 |
| 4/23/2019 17:38 | 1      | 0.0333  | 4.0498 | -0.6833 | 0.5913 | 5.2    | 0.179  | -0.7418 |
| 4/23/2019 17:39 | 1      | -0.3333 | 4.0495 | 0.2167  | 0.5913 | 5.2    | 0.1804 | -0.7418 |
| 4/23/2019 17:40 | 1.0333 | 0.55    | 4.12   | 0.05    | 0.5913 | 5.1455 | 0.1673 | -0.7418 |
| 4/23/2019 17:41 | 1.1    | -0.8667 | 4.1423 | 0.05    | 0.5913 | 5.1    | 0.1802 | -0.7418 |
| 4/23/2019 17:42 | 1.1    | -0.0667 | 4.114  | -0.3167 | 0.5913 | 5.1    | 0.1723 | -0.7418 |
| 4/23/2019 17:43 | 1.0167 | -1.05   | 4.2623 | 0.3333  | 0.5913 | 5.1    | 0.1719 | -0.7418 |
| 4/23/2019 17:44 | 0.9417 | 0.2167  | 3.9435 | 0.1333  | 0.5913 | 5.1    | 0.1842 | -0.7418 |
| 4/23/2019 17:45 | 0.8333 | -0.8167 | 4.2023 | 0.2     | 0.5913 | 5.17   | 0.1654 | -0.7418 |
| 4/23/2019 17:46 | 0.8    | 0       | 4.1838 | -0.7333 | 0.5913 | 5.2    | 0.186  | -0.7418 |
| 4/23/2019 17:47 | 0.7417 | -0.6333 | 4.2078 | -0.15   | 0.5913 | 5.2    | 0.1734 | -0.7418 |
| 4/23/2019 17:48 | 0.7    | -0.4333 | 4.2085 | -0.4667 | 0.5913 | 5.225  | 0.1751 | -0.7418 |
| 4/23/2019 17:49 | 0.7    | 0.2167  | 4.0498 | -0.3167 | 0.5913 | 5.3    | 0.1836 | -0.7418 |
| 4/23/2019 17:50 | 0.7417 | -0.2333 | 3.897  | -0.7333 | 0.5913 | 5.3    | 0.1705 | -0.7418 |
| 4/23/2019 17:51 | 0.8    | -0.1167 | 4.0012 | 0.1167  | 0.5913 | 5.3364 | 0.1687 | -0.7418 |
| 4/23/2019 17:52 | 0.8    | 0.15    | 3.803  | -0.0333 | 0.5913 | 5.4    | 0.1758 | -0.7418 |

|                 |        |         |        |         |        |        |        |         |
|-----------------|--------|---------|--------|---------|--------|--------|--------|---------|
| 4/23/2019 17:53 | 0.8    | 0.1333  | 4.0228 | -0.1833 | 0.5913 | 5.4    | 0.1682 | -0.7418 |
| 4/23/2019 17:54 | 0.8    | 0.15    | 3.9937 | -0.5667 | 0.5913 | 5.4    | 0.1795 | -0.7418 |
| 4/23/2019 17:55 | 0.7417 | -0.3667 | 4.3118 | -0.4667 | 0.5913 | 5.4    | 0.1662 | -0.7418 |
| 4/23/2019 17:56 | 0.7    | 0.0167  | 4.0472 | 0.2167  | 0.5913 | 5.4636 | 0.1756 | -0.7418 |
| 4/23/2019 17:57 | 0.7    | -0.25   | 4.1918 | 0.4     | 0.5913 | 5.43   | 0.1735 | -0.7418 |
| 4/23/2019 17:58 | 0.7    | 0.0833  | 4.0815 | -0.45   | 0.5913 | 5.4    | 0.1665 | -0.7418 |
| 4/23/2019 17:59 | 0.75   | 0       | 4.0222 | -0.2    | 0.5913 | 5.4    | 0.1822 | -0.7418 |
| 4/23/2019 18:00 | 0.725  | -0.2167 | 3.9807 | -0.2333 | 0.5913 | 5.4    | 0.1658 | -0.7418 |
| 4/23/2019 18:01 | 0.7167 | -0.2    | 4.0403 | 0       | 0.5913 | 5.4    | 0.185  | -0.7418 |
| 4/23/2019 18:02 | 0.7667 | 0.1     | 4.1073 | -0.05   | 0.5913 | 5.4    | 0.1763 | -0.7418 |
| 4/23/2019 18:03 | 0.8    | 0.25    | 4.0282 | -0.1    | 0.5913 | 5.4    | 0.1718 | -0.7418 |
| 4/23/2019 18:04 | 0.8    | -0.2333 | 4.0493 | 0.0167  | 0.5913 | 5.4    | 0.1822 | -0.7418 |
| 4/23/2019 18:05 | 0.8    | -0.2167 | 4.2628 | 0.4167  | 0.5913 | 5.4    | 0.1699 | -0.7418 |
| 4/23/2019 18:06 | 0.8    | -0.2167 | 4.0302 | -0.35   | 0.5913 | 5.4    | 0.1818 | -0.7418 |
| 4/23/2019 18:07 | 0.8    | 0.1333  | 4.1027 | -0.25   | 0.5913 | 5.4    | 0.1782 | -0.7418 |
| 4/23/2019 18:08 | 0.8417 | 0.0667  | 3.994  | 0.2833  | 0.5913 | 5.3364 | 0.1686 | -0.7418 |
| 4/23/2019 18:09 | 0.9    | -0.1167 | 3.998  | -0.1333 | 0.5913 | 5.325  | 0.1855 | -0.7418 |
| 4/23/2019 18:10 | 0.9    | -0.7    | 4.291  | -0.1    | 0.5913 | 5.3    | 0.1748 | -0.7418 |
| 4/23/2019 18:11 | 0.9    | 0.0833  | 4.2062 | 0.1     | 0.5913 | 5.3    | 0.1896 | -0.7418 |
| 4/23/2019 18:12 | 0.8333 | 0.3333  | 3.6138 | 0.0167  | 0.5913 | 5.3    | 0.1837 | -0.7418 |
| 4/23/2019 18:13 | 0.8    | -0.8833 | 4.1287 | -0.2833 | 0.5913 | 5.3    | 0.1732 | -0.7418 |
| 4/23/2019 18:14 | 0.7417 | -0.3    | 4.2113 | -0.2333 | 0.5913 | 5.3833 | 0.1886 | -0.7418 |
| 4/23/2019 18:15 | 0.7    | 0.25    | 4.1148 | -0.2833 | 0.5913 | 5.4    | 0.1773 | -0.7418 |
| 4/23/2019 18:16 | 0.7    | 0.2333  | 3.9585 | -0.2167 | 0.5913 | 5.4    | 0.1802 | -0.7418 |
| 4/23/2019 18:17 | 0.7    | -0.5833 | 4.0542 | -0.25   | 0.5913 | 5.4    | 0.1835 | -0.7418 |
| 4/23/2019 18:18 | 0.7    | 0       | 4.0073 | -0.25   | 0.5913 | 5.4    | 0.1735 | -0.7418 |
| 4/23/2019 18:19 | 0.7    | -0.2667 | 3.8387 | 0.1833  | 0.5913 | 5.4    | 0.1901 | -0.7418 |
| 4/23/2019 18:20 | 0.7917 | 0.15    | 4.1718 | 0.0333  | 0.5913 | 5.4    | 0.1773 | -0.7418 |
| 4/23/2019 18:21 | 0.775  | -0.2    | 3.852  | -0.5333 | 0.5913 | 5.4    | 0.1835 | -0.7418 |
| 4/23/2019 18:22 | 0.8    | 0.0833  | 3.6062 | -0.4    | 0.5913 | 5.4917 | 0.1875 | -0.7418 |
| 4/23/2019 18:23 | 0.8    | -1.2667 | 4.0967 | -0.0667 | 0.5913 | 5.5    | 0.1752 | -0.7418 |
| 4/23/2019 18:24 | 0.8    | 0.1667  | 3.9832 | -0.1    | 0.5913 | 5.5    | 0.1949 | -0.7418 |
| 4/23/2019 18:25 | 0.7083 | -0.3167 | 3.7128 | 0.2667  | 0.5913 | 5.5    | 0.1777 | -0.7418 |
| 4/23/2019 18:26 | 0.7    | -0.2833 | 3.8242 | 0.15    | 0.5913 | 5.5    | 0.1855 | -0.7418 |
| 4/23/2019 18:27 | 0.7    | 0.1667  | 3.997  | 0.05    | 0.5913 | 5.4364 | 0.1845 | -0.7418 |
| 4/23/2019 18:28 | 0.7    | -0.8833 | 3.7747 | 0.3167  | 0.5913 | 5.4455 | 0.1764 | -0.7418 |
| 4/23/2019 18:29 | 0.7167 | -0.1    | 3.722  | 0.3167  | 0.5913 | 5.5    | 0.1866 | -0.7418 |
| 4/23/2019 18:30 | 0.7    | -0.7167 | 3.8295 | -0.15   | 0.5913 | 5.5    | 0.1754 | -0.7418 |
| 4/23/2019 18:31 | 0.7    | -0.1167 | 3.7572 | 0.8167  | 0.5913 | 5.5    | 0.1844 | -0.7418 |
| 4/23/2019 18:32 | 0.7    | -0.9167 | 3.9017 | -0.3    | 0.5913 | 5.5    | 0.1816 | -0.7418 |
| 4/23/2019 18:33 | 0.7    | -0.25   | 3.854  | -0.2167 | 0.5913 | 5.5    | 0.179  | -0.7418 |
| 4/23/2019 18:34 | 0.7    | -1.1167 | 3.9053 | 0.0833  | 0.5913 | 5.5    | 0.1879 | -0.7418 |
| 4/23/2019 18:35 | 0.7    | -0.8167 | 4.0051 | -0.1167 | 0.5913 | 5.5    | 0.1739 | -0.7418 |
| 4/23/2019 18:36 | 0.7    | -0.1833 | 4.0809 | -0.3    | 0.5913 | 5.5    | 0.1843 | -0.7418 |
| 4/23/2019 18:37 | 0.75   | -0.6167 | 3.7946 | -0.05   | 0.5913 | 5.5167 | 0.1871 | -0.7418 |
| 4/23/2019 18:38 | 0.8    | 0.7     | 3.8336 | 0.15    | 0.5913 | 5.6    | 0.1779 | -0.7418 |
| 4/23/2019 18:39 | 0.8    | 0.1167  | 4.0483 | -0.0667 | 0.5913 | 5.6    | 0.1875 | -0.7418 |

|                 |        |         |        |         |        |        |        |         |
|-----------------|--------|---------|--------|---------|--------|--------|--------|---------|
| 4/23/2019 18:40 | 0.7333 | -0.6833 | 4.0533 | -0.0667 | 0.5913 | 5.6    | 0.1731 | -0.7418 |
| 4/23/2019 18:41 | 0.7    | 0.7167  | 4.0282 | -0.6167 | 0.5913 | 5.6    | 0.1884 | -0.7418 |
| 4/23/2019 18:42 | 0.75   | -0.45   | 3.7661 | -0.7833 | 0.5913 | 5.6    | 0.1916 | -0.7418 |
| 4/23/2019 18:43 | 0.8    | 0.3     | 3.9814 | -0.4833 | 0.5913 | 5.6    | 0.174  | -0.7418 |
| 4/23/2019 18:44 | 0.7833 | -0.0167 | 4.0194 | -0.5167 | 0.5913 | 5.6    | 0.1864 | -0.7418 |
| 4/23/2019 18:45 | 0.7    | -0.5667 | 3.7498 | -0.1667 | 0.5913 | 5.6    | 0.1829 | -0.7418 |
| 4/23/2019 18:46 | 0.7    | -0.7667 | 3.8005 | -0.4    | 0.5913 | 5.6    | 0.1836 | -0.7418 |
| 4/23/2019 18:47 | 0.7    | -0.35   | 3.9134 | -0.7667 | 0.5913 | 5.6    | 0.1924 | -0.7418 |
| 4/23/2019 18:48 | 0.7    | -0.5    | 3.9883 | -0.4667 | 0.5913 | 5.6    | 0.1788 | -0.7418 |
| 4/23/2019 18:49 | 0.7    | 0.6667  | 3.7083 | -0.1    | 0.5913 | 5.6    | 0.1844 | -0.7418 |
| 4/23/2019 18:50 | 0.6917 | -0.5167 | 3.6881 | -0.1    | 0.5913 | 5.6    | 0.1743 | -0.7418 |
| 4/23/2019 18:51 | 0.7    | -0.4    | 3.8025 | -0.0833 | 0.5913 | 5.6    | 0.1931 | -0.7418 |
| 4/23/2019 18:52 | 0.7    | -0.3667 | 3.8267 | 0.2667  | 0.5913 | 5.6    | 0.1736 | -0.7418 |
| 4/23/2019 18:53 | 0.8    | -0.3167 | 3.7134 | 0       | 0.5913 | 5.6    | 0.1806 | -0.7418 |
| 4/23/2019 18:54 | 0.8    | -0.3    | 4.0056 | -0.3    | 0.5913 | 5.6    | 0.1876 | -0.7418 |
| 4/23/2019 18:55 | 0.8    | -0.15   | 4.1375 | -0.4667 | 0.5913 | 5.6    | 0.1775 | -0.7418 |
| 4/23/2019 18:56 | 0.7083 | -0.65   | 4.0527 | -0.2    | 0.5913 | 5.6    | 0.1952 | -0.7418 |
| 4/23/2019 18:57 | 0.7    | -0.0833 | 4.1873 | 0.1833  | 0.5913 | 5.5667 | 0.1766 | -0.7418 |
| 4/23/2019 18:58 | 0.7083 | 0.1     | 3.731  | -0.3333 | 0.5913 | 5.5    | 0.1829 | -0.7418 |
| 4/23/2019 18:59 | 0.7    | 0       | 4.0943 | -0.1167 | 0.5913 | 5.5    | 0.1932 | -0.7418 |
| 4/23/2019 19:00 | 0.7    | 0.05    | 3.6818 | 0.55    | 0.5913 | 5.5    | 0.1804 | -0.7418 |
| 4/23/2019 19:01 | 0.7    | -0.15   | 3.7183 | 0.05    | 0.5913 | 5.5    | 0.1856 | -0.7418 |
| 4/23/2019 19:02 | 0.75   | -0.3667 | 3.6695 | -0.0833 | 0.5913 | 5.5    | 0.1761 | -0.7418 |
| 4/23/2019 19:03 | 0.8    | -0.2167 | 3.4843 | -0.2    | 0.5913 | 5.5    | 0.1833 | -0.7418 |
| 4/23/2019 19:04 | 0.8    | -0.1667 | 3.9705 | -0.8667 | 0.5913 | 5.5    | 0.1821 | -0.7418 |
| 4/23/2019 19:05 | 0.8    | -0.2333 | 4.0843 | -0.3833 | 0.5913 | 5.5    | 0.1728 | -0.7418 |
| 4/23/2019 19:06 | 0.7167 | -0.4667 | 4.2158 | 0.05    | 0.5913 | 5.5    | 0.1906 | -0.7418 |
| 4/23/2019 19:07 | 0.7167 | 0.2     | 4.0816 | -0.5333 | 0.5913 | 5.5    | 0.1762 | -0.7418 |
| 4/23/2019 19:08 | 0.7833 | 0.1333  | 3.955  | -0.3833 | 0.5913 | 5.5    | 0.1853 | -0.7418 |
| 4/23/2019 19:09 | 0.8    | -0.6667 | 3.9962 | -0.3    | 0.5913 | 5.5    | 0.1781 | -0.7418 |
| 4/23/2019 19:10 | 0.7833 | -0.2167 | 3.7448 | -0.9167 | 0.5913 | 5.5    | 0.1772 | -0.7418 |
| 4/23/2019 19:11 | 0.775  | -0.0833 | 3.7735 | -0.2333 | 0.5913 | 5.5    | 0.1849 | -0.7418 |
| 4/23/2019 19:12 | 0.7333 | 0.0333  | 3.6804 | -0.2    | 0.5913 | 5.5    | 0.1712 | -0.7418 |
| 4/23/2019 19:13 | 0.75   | 0.3333  | 3.9412 | -0.4667 | 0.5913 | 5.5    | 0.1808 | -0.7418 |
| 4/23/2019 19:14 | 0.7167 | 0.1333  | 3.9492 | -0.25   | 0.5913 | 5.5    | 0.1731 | -0.7418 |
| 4/23/2019 19:15 | 0.75   | -0.0333 | 3.7301 | -0.1833 | 0.5913 | 5.5    | 0.1746 | -0.7418 |
| 4/23/2019 19:16 | 0.8    | -0.1333 | 3.9556 | -0.3    | 0.5913 | 5.5    | 0.1788 | -0.7418 |
| 4/23/2019 19:17 | 0.8    | -0.8    | 4.0367 | -0.0167 | 0.5913 | 5.5    | 0.1731 | -0.7418 |
| 4/23/2019 19:18 | 0.8    | 0.4833  | 3.8057 | 0.1167  | 0.5913 | 5.5    | 0.1872 | -0.7418 |
| 4/23/2019 19:19 | 0.8    | -0.3833 | 4.0363 | -0.3333 | 0.5913 | 5.5    | 0.1782 | -0.7418 |
| 4/23/2019 19:20 | 0.775  | -0.7167 | 4.1423 | -0.7333 | 0.5913 | 5.5    | 0.1813 | -0.7418 |
| 4/23/2019 19:21 | 0.7    | -0.2    | 4.0351 | -0.4    | 0.5913 | 5.5273 | 0.1843 | -0.7418 |
| 4/23/2019 19:22 | 0.7    | -0.6167 | 3.6335 | -0.5    | 0.5913 | 5.6    | 0.1747 | -0.7418 |
| 4/23/2019 19:23 | 0.7    | -0.4667 | 3.542  | 0.1167  | 0.5913 | 5.6    | 0.1869 | -0.7418 |
| 4/23/2019 19:24 | 0.7    | -0.2    | 3.822  | -0.15   | 0.5913 | 5.6    | 0.1718 | -0.7418 |
| 4/23/2019 19:25 | 0.7    | 0.4167  | 3.9964 | 0.1     | 0.5913 | 5.6    | 0.187  | -0.7418 |
| 4/23/2019 19:26 | 0.7    | -0.2833 | 3.7658 | 0.1667  | 0.5913 | 5.6    | 0.1836 | -0.7418 |



|                 |        |         |        |         |        |        |        |         |
|-----------------|--------|---------|--------|---------|--------|--------|--------|---------|
| 4/23/2019 19:27 | 0.7    | -0.1333 | 3.9133 | -0.2167 | 0.5913 | 5.6    | 0.1757 | -0.7418 |
| 4/23/2019 19:28 | 0.7    | 0.4167  | 3.6601 | -0.4833 | 0.5913 | 5.6    | 0.1873 | -0.7418 |
| 4/23/2019 19:29 | 0.7    | -0.2833 | 4.2015 | -0.4667 | 0.5913 | 5.6    | 0.1718 | -0.7418 |
| 4/23/2019 19:30 | 0.7    | 0.25    | 3.5889 | -0.0333 | 0.5913 | 5.6    | 0.191  | -0.7418 |
| 4/23/2019 19:31 | 0.7    | -0.5    | 3.7381 | 0.3167  | 0.5913 | 5.6    | 0.1773 | -0.7418 |
| 4/23/2019 19:32 | 0.7    | -0.1667 | 3.7727 | -0.1    | 0.5913 | 5.6    | 0.1836 | -0.7418 |
| 4/23/2019 19:33 | 0.7    | 0.0667  | 3.8214 | -0.3667 | 0.5913 | 5.5417 | 0.1843 | -0.7418 |
| 4/23/2019 19:34 | 0.6917 | -0.3167 | 3.6831 | 0.15    | 0.5913 | 5.5    | 0.1687 | -0.7418 |
| 4/23/2019 19:35 | 0.7    | -0.3667 | 4.1563 | 0.15    | 0.5913 | 5.5    | 0.1858 | -0.7418 |
| 4/23/2019 19:36 | 0.7    | 0.2333  | 3.9091 | -0.3667 | 0.5913 | 5.5    | 0.1766 | -0.7418 |
| 4/23/2019 19:37 | 0.7083 | -0.2333 | 3.817  | -0.0167 | 0.5913 | 5.575  | 0.1762 | -0.7418 |
| 4/23/2019 19:38 | 0.8    | -0.5667 | 3.4413 | 0.0167  | 0.5913 | 5.6    | 0.1845 | -0.7418 |
| 4/23/2019 19:39 | 0.8    | -0.5667 | 3.7737 | -0.0667 | 0.5913 | 5.6    | 0.1701 | -0.7418 |
| 4/23/2019 19:40 | 0.8    | 0.3     | 4.0647 | 0.0833  | 0.5913 | 5.6    | 0.186  | -0.7418 |
| 4/23/2019 19:41 | 0.7667 | -0.3333 | 3.5973 | 0.3167  | 0.5913 | 5.6    | 0.1695 | -0.7418 |
| 4/23/2019 19:42 | 0.8    | 0.3     | 4.0563 | 0.4833  | 0.5913 | 5.6    | 0.1807 | -0.7418 |
| 4/23/2019 19:43 | 0.8    | -0.8167 | 4.0116 | 0.4833  | 0.5913 | 5.6    | 0.1819 | -0.7418 |
| 4/23/2019 19:44 | 0.8    | -0.45   | 4.1094 | 0.0667  | 0.5913 | 5.7    | 0.1717 | -0.7418 |
| 4/23/2019 19:45 | 0.8    | -0.4667 | 3.7839 | -0.5333 | 0.5913 | 5.7    | 0.1822 | -0.7418 |
| 4/23/2019 19:46 | 0.7333 | -0.15   | 3.5058 | 0.55    | 0.5913 | 5.75   | 0.1718 | -0.7418 |
| 4/23/2019 19:47 | 0.7167 | -0.7    | 3.9116 | -0.1333 | 0.5913 | 5.7    | 0.1835 | -0.7418 |
| 4/23/2019 19:48 | 0.7    | 0.0833  | 3.785  | -0.1667 | 0.5913 | 5.7    | 0.1826 | -0.7418 |
| 4/23/2019 19:49 | 0.7    | 0.2667  | 3.9041 | -0.3333 | 0.5913 | 5.7    | 0.1715 | -0.7418 |
| 4/23/2019 19:50 | 0.625  | -0.8333 | 3.8452 | -0.6333 | 0.5913 | 5.7    | 0.185  | -0.7418 |
| 4/23/2019 19:51 | 0.6    | -0.3833 | 3.9767 | 0.1     | 0.5913 | 5.8    | 0.1738 | -0.7418 |
| 4/23/2019 19:52 | 0.6    | -0.05   | 3.913  | -0.45   | 0.5913 | 5.8    | 0.1813 | -0.7418 |
| 4/23/2019 19:53 | 0.6083 | 0.3333  | 3.8841 | -0.3833 | 0.5913 | 5.8    | 0.1773 | -0.7418 |
| 4/23/2019 19:54 | 0.65   | -0.2167 | 3.5668 | -0.15   | 0.5913 | 5.8    | 0.1713 | -0.7418 |
| 4/23/2019 19:55 | 0.7    | -0.45   | 3.7101 | -0.6167 | 0.5913 | 5.8    | 0.1847 | -0.7418 |
| 4/23/2019 19:56 | 0.7333 | 0.0833  | 3.6853 | -0.6333 | 0.5913 | 5.8    | 0.1694 | -0.7418 |
| 4/23/2019 19:57 | 0.8    | 0.7     | 3.8153 | -0.6667 | 0.5913 | 5.77   | 0.1854 | -0.7418 |
| 4/23/2019 19:58 | 0.7917 | -0.3833 | 3.8406 | -0.7667 | 0.5913 | 5.7    | 0.1745 | -0.7418 |
| 4/23/2019 19:59 | 0.8    | 0.1333  | 4.1336 | -0.6667 | 0.5913 | 5.7    | 0.1705 | -0.7418 |
| 4/23/2019 20:00 | 0.8    | 0.5833  | 3.5544 | 0.8     | 0.5913 | 5.75   | 0.1843 | -0.7418 |
| 4/23/2019 20:01 | 0.8    | -0.1333 | 3.8478 | -0.5    | 0.5913 | 5.7    | 0.1737 | -0.7418 |
| 4/23/2019 20:02 | 0.8    | -0.3833 | 4.0176 | -0.4333 | 0.5913 | 5.7    | 0.1866 | -0.7418 |
| 4/23/2019 20:03 | 0.8    | 0.05    | 4.2198 | -0.9167 | 0.5913 | 5.7    | 0.1778 | -0.7418 |
| 4/23/2019 20:04 | 0.8    | 0.0833  | 3.7802 | -0.6833 | 0.5913 | 5.7    | 0.1791 | -0.7418 |
| 4/23/2019 20:05 | 0.8    | -0.6833 | 3.9493 | -1.1333 | 0.5913 | 5.7    | 0.1844 | -0.7418 |
| 4/23/2019 20:06 | 0.8417 | -0.0833 | 3.9825 | -0.4667 | 0.5913 | 5.7    | 0.1685 | -0.7418 |
| 4/23/2019 20:07 | 0.9    | -0.5    | 3.697  | -0.8333 | 0.5913 | 5.7    | 0.1817 | -0.7418 |
| 4/23/2019 20:08 | 0.9    | -1.05   | 3.6463 | -0.5333 | 0.5913 | 5.7    | 0.1831 | -0.7418 |
| 4/23/2019 20:09 | 0.8167 | -0.65   | 3.784  | -0.6167 | 0.5913 | 5.7    | 0.1778 | -0.7418 |
| 4/23/2019 20:10 | 0.7667 | 0.2667  | 3.6308 | -0.5167 | 0.5913 | 5.7    | 0.1855 | -0.7418 |
| 4/23/2019 20:11 | 0.7    | -0.05   | 3.8667 | -0.1    | 0.5913 | 5.7    | 0.1788 | -0.7418 |
| 4/23/2019 20:12 | 0.7    | 0       | 3.7262 | -0.5167 | 0.5913 | 5.7083 | 0.1805 | -0.7418 |
| 4/23/2019 20:13 | 0.7    | -0.1667 | 3.8863 | -0.25   | 0.5913 | 5.8    | 0.184  | -0.7418 |

|                 |        |         |        |         |        |        |        |         |
|-----------------|--------|---------|--------|---------|--------|--------|--------|---------|
| 4/23/2019 20:14 | 0.7    | 0.3333  | 3.7473 | -0.5667 | 0.5913 | 5.7727 | 0.1758 | -0.7418 |
| 4/23/2019 20:15 | 0.6917 | -0.1833 | 3.6267 | -0.2    | 0.5913 | 5.7    | 0.1915 | -0.7418 |
| 4/23/2019 20:16 | 0.6    | -0.3833 | 3.917  | -0.2    | 0.5913 | 5.7    | 0.1681 | -0.7418 |
| 4/23/2019 20:17 | 0.6    | -0.7333 | 3.9702 | -0.5333 | 0.5913 | 5.7    | 0.1814 | -0.7418 |
| 4/23/2019 20:18 | 0.6    | -0.5667 | 3.9033 | -0.0833 | 0.5913 | 5.7    | 0.1832 | -0.7418 |
| 4/23/2019 20:19 | 0.6    | -0.3167 | 3.7497 | -0.4667 | 0.5913 | 5.7    | 0.1786 | -0.7418 |
| 4/23/2019 20:20 | 0.6    | -0.45   | 3.8368 | -0.3167 | 0.5913 | 5.7    | 0.1868 | -0.7418 |
| 4/23/2019 20:21 | 0.5083 | -0.8333 | 4.0483 | -0.7    | 0.5913 | 5.7091 | 0.1755 | -0.7418 |
| 4/23/2019 20:22 | 0.5667 | 0.2333  | 3.64   | -0.7167 | 0.5913 | 5.7636 | 0.1891 | -0.7418 |
| 4/23/2019 20:23 | 0.5    | -0.15   | 3.819  | -0.9167 | 0.5913 | 5.7    | 0.1856 | -0.7418 |
| 4/23/2019 20:24 | 0.5    | -0.4333 | 3.5468 | -0.0167 | 0.5913 | 5.7    | 0.1857 | -0.7418 |
| 4/23/2019 20:25 | 0.5    | -0.4333 | 3.8365 | 0.0167  | 0.5913 | 5.7    | 0.1864 | -0.7418 |
| 4/23/2019 20:26 | 0.5333 | -0.5667 | 3.9887 | -0.2333 | 0.5913 | 5.7    | 0.1713 | -0.7418 |
| 4/23/2019 20:27 | 0.6    | -0.4833 | 3.6443 | -0.5    | 0.5913 | 5.7    | 0.1804 | -0.7418 |
| 4/23/2019 20:28 | 0.6333 | -0.3333 | 3.7485 | -0.4167 | 0.5913 | 5.7    | 0.1857 | -0.7418 |
| 4/23/2019 20:29 | 0.6    | -0.5    | 3.6497 | 0.0833  | 0.5913 | 5.7    | 0.1766 | -0.7418 |
| 4/23/2019 20:30 | 0.6    | -0.2833 | 3.6113 | -0.6167 | 0.5913 | 5.7    | 0.1864 | -0.7418 |
| 4/23/2019 20:31 | 0.6    | -0.3333 | 3.9078 | -0.7167 | 0.5913 | 5.6    | 0.1773 | -0.7418 |
| 4/23/2019 20:32 | 0.6    | -0.4833 | 4.1085 | -0.7667 | 0.5913 | 5.6    | 0.1869 | -0.7418 |
| 4/23/2019 20:33 | 0.6    | -0.4333 | 3.6668 | -0.0833 | 0.5913 | 5.6    | 0.186  | -0.7418 |
| 4/23/2019 20:34 | 0.6    | 0       | 3.7592 | 0.1     | 0.5913 | 5.6    | 0.1749 | -0.7418 |
| 4/23/2019 20:35 | 0.6    | -0.4    | 3.336  | -0.2667 | 0.5913 | 5.6    | 0.1925 | -0.7418 |
| 4/23/2019 20:36 | 0.6917 | -0.25   | 3.5572 | -0.0167 | 0.5913 | 5.6417 | 0.1752 | -0.7418 |
| 4/23/2019 20:37 | 0.6833 | -0.3667 | 3.7243 | 0.0333  | 0.5913 | 5.6727 | 0.1884 | -0.7418 |
| 4/23/2019 20:38 | 0.7    | -0.45   | 3.6298 | 0.5     | 0.5913 | 5.625  | 0.1824 | -0.7418 |
| 4/23/2019 20:39 | 0.7    | -0.0167 | 3.8473 | -0.3167 | 0.5913 | 5.6    | 0.181  | -0.7418 |
| 4/23/2019 20:40 | 0.7    | -0.2667 | 3.491  | -0.3833 | 0.5913 | 5.5636 | 0.1919 | -0.7418 |
| 4/23/2019 20:41 | 0.7    | 0.1     | 3.4487 | -0.1833 | 0.5913 | 5.5    | 0.1778 | -0.7418 |
| 4/23/2019 20:42 | 0.7    | -0.6    | 3.8403 | -0.5667 | 0.5913 | 5.5333 | 0.1873 | -0.7418 |
| 4/23/2019 20:43 | 0.7    | -0.0167 | 3.6762 | -0.2333 | 0.5913 | 5.6    | 0.1794 | -0.7418 |
| 4/23/2019 20:44 | 0.7    | -0.5333 | 3.8115 | -0.1833 | 0.5913 | 5.6    | 0.1839 | -0.7418 |
| 4/23/2019 20:45 | 0.7    | -0.4667 | 3.5335 | -0.0833 | 0.5913 | 5.6    | 0.186  | -0.7418 |
| 4/23/2019 20:46 | 0.7    | 0.1167  | 3.8753 | -0.65   | 0.5913 | 5.6    | 0.1723 | -0.7418 |
| 4/23/2019 20:47 | 0.7    | -0.1333 | 4.0023 | -0.8333 | 0.5913 | 5.5    | 0.1934 | -0.7418 |
| 4/23/2019 20:48 | 0.7    | 0.1333  | 3.7442 | -1.0833 | 0.5913 | 5.5    | 0.1768 | -0.7418 |
| 4/23/2019 20:49 | 0.7    | -0.7167 | 3.6428 | -0.1667 | 0.5913 | 5.5545 | 0.1939 | -0.7418 |
| 4/23/2019 20:50 | 0.7583 | -0.95   | 3.7138 | -0.55   | 0.5913 | 5.6    | 0.1898 | -0.7418 |
| 4/23/2019 20:51 | 0.8    | -0.2333 | 3.708  | -0.8667 | 0.5913 | 5.6    | 0.1744 | -0.7418 |
| 4/23/2019 20:52 | 0.8    | 0.0667  | 3.6807 | -0.05   | 0.5913 | 5.6909 | 0.1932 | -0.7418 |
| 4/23/2019 20:53 | 0.8    | -0.55   | 3.9005 | -0.1    | 0.5913 | 5.7182 | 0.1725 | -0.7418 |
| 4/23/2019 20:54 | 0.8    | 0.2     | 3.7305 | -0.3    | 0.5913 | 5.8    | 0.1826 | -0.7418 |
| 4/23/2019 20:55 | 0.7083 | -0.3167 | 3.6422 | -0.1333 | 0.5913 | 5.8    | 0.1857 | -0.7418 |
| 4/23/2019 20:56 | 0.7    | 0.1     | 3.4835 | 0.1     | 0.5913 | 5.8    | 0.1748 | -0.7418 |
| 4/23/2019 20:57 | 0.7    | -0.7    | 3.7967 | -0.1333 | 0.5913 | 5.8667 | 0.1892 | -0.7418 |
| 4/23/2019 20:58 | 0.7    | -0.8833 | 3.6742 | -0.0667 | 0.5913 | 5.9182 | 0.1781 | -0.7418 |
| 4/23/2019 20:59 | 0.7    | 0.15    | 3.7015 | -0.75   | 0.5913 | 6      | 0.187  | -0.7418 |
| 4/23/2019 21:00 | 0.7    | 0.4833  | 3.772  | -0.1833 | 0.5913 | 6      | 0.1884 | -0.7418 |

|                 |        |         |        |         |        |        |        |         |
|-----------------|--------|---------|--------|---------|--------|--------|--------|---------|
| 4/23/2019 21:01 | 0.7    | -0.4    | 3.5898 | -0.3833 | 0.5913 | 6      | 0.1772 | -0.7418 |
| 4/23/2019 21:02 | 0.6    | -0.4833 | 3.806  | -0.2167 | 0.5913 | 6.0636 | 0.1912 | -0.7418 |
| 4/23/2019 21:03 | 0.6417 | -1.3167 | 3.8018 | -0.85   | 0.5913 | 6.1    | 0.1813 | -0.7418 |
| 4/23/2019 21:04 | 0.6917 | 0.1833  | 3.6647 | -0.8    | 0.5913 | 6.0917 | 0.1894 | -0.7418 |
| 4/23/2019 21:05 | 0.7083 | -0.1833 | 3.572  | -0.25   | 0.5913 | 6      | 0.186  | -0.7418 |
| 4/23/2019 21:06 | 0.7917 | -0.1667 | 3.8948 | -0.3833 | 0.5913 | 6.025  | 0.1833 | -0.7418 |
| 4/23/2019 21:07 | 0.7167 | -0.1833 | 3.5498 | -0.9167 | 0.5913 | 6.1    | 0.1956 | -0.7418 |
| 4/23/2019 21:08 | 0.7    | -0.2333 | 3.5347 | -0.4667 | 0.5913 | 6.1    | 0.1749 | -0.7418 |
| 4/23/2019 21:09 | 0.7    | -0.1    | 3.6852 | -0.3167 | 0.5913 | 6.0818 | 0.1848 | -0.7418 |
| 4/23/2019 21:10 | 0.7    | -0.7167 | 3.61   | 0.4333  | 0.5913 | 6      | 0.1828 | -0.7418 |
| 4/23/2019 21:11 | 0.7    | -0.5333 | 3.7897 | -0.55   | 0.5913 | 6      | 0.1822 | -0.7418 |
| 4/23/2019 21:12 | 0.6333 | -0.7333 | 3.7618 | -0.6833 | 0.5913 | 6      | 0.187  | -0.7418 |
| 4/23/2019 21:13 | 0.6167 | 0.15    | 3.5912 | -0.55   | 0.5913 | 6      | 0.1766 | -0.7418 |
| 4/23/2019 21:14 | 0.6333 | -0.8    | 3.3922 | -0.4833 | 0.5913 | 6.0818 | 0.1913 | -0.7418 |
| 4/23/2019 21:15 | 0.6    | -0.2    | 3.5447 | -0.2833 | 0.5913 | 6.1    | 0.1741 | -0.7418 |
| 4/23/2019 21:16 | 0.5833 | -0.9    | 3.6297 | 0.0333  | 0.5913 | 6.1    | 0.1863 | -0.7418 |
| 4/23/2019 21:17 | 0.5667 | -0.45   | 3.4388 | -0.6167 | 0.5913 | 6.1    | 0.1841 | -0.7418 |
| 4/23/2019 21:18 | 0.5917 | 1.0167  | 3.5253 | -0.95   | 0.5913 | 6.1    | 0.1833 | -0.7418 |
| 4/23/2019 21:19 | 0.6    | -0.4333 | 3.1743 | -0.0667 | 0.5913 | 6.1    | 0.1884 | -0.7418 |
| 4/23/2019 21:20 | 0.6    | -0.4167 | 3.4493 | -0.4833 | 0.5913 | 6.1    | 0.1782 | -0.7418 |
| 4/23/2019 21:21 | 0.5    | -1      | 3.4395 | -0.4667 | 0.5913 | 6.1    | 0.1981 | -0.7418 |
| 4/23/2019 21:22 | 0.5583 | -0.85   | 3.3875 | -0.5333 | 0.5913 | 6.1    | 0.1847 | -0.7418 |
| 4/23/2019 21:23 | 0.5    | -0.9    | 4.0782 | 0.3833  | 0.5913 | 6.1    | 0.1795 | -0.7418 |
| 4/23/2019 21:24 | 0.5    | -0.35   | 3.7218 | -0.3667 | 0.5913 | 6.1    | 0.1887 | -0.7418 |
| 4/23/2019 21:25 | 0.5    | -0.1833 | 3.7127 | -0.5167 | 0.5913 | 6.1    | 0.1761 | -0.7418 |
| 4/23/2019 21:26 | 0.5167 | -0.4667 | 3.7677 | -0.2    | 0.5913 | 6.1    | 0.1908 | -0.7418 |
| 4/23/2019 21:27 | 0.6    | -0.4833 | 3.7212 | -0.8    | 0.5913 | 6.02   | 0.1805 | -0.7418 |
| 4/23/2019 21:28 | 0.5    | 1.2     | 3.6047 | -0.6667 | 0.5913 | 6      | 0.1806 | -0.7418 |
| 4/23/2019 21:29 | 0.5    | -0.6167 | 3.4025 | -0.6167 | 0.5913 | 6      | 0.1845 | -0.7418 |
| 4/23/2019 21:30 | 0.5    | -0.7    | 3.8478 | -0.6333 | 0.5913 | 6      | 0.1795 | -0.7418 |
| 4/23/2019 21:31 | 0.5    | -0.35   | 3.7205 | -0.6833 | 0.5913 | 6      | 0.1873 | -0.7418 |
| 4/23/2019 21:32 | 0.5583 | 0.3333  | 3.7126 | -0.05   | 0.5913 | 6      | 0.1761 | -0.7418 |
| 4/23/2019 21:33 | 0.6    | -0.0167 | 3.6641 | -1.0333 | 0.5913 | 6      | 0.1901 | -0.7418 |
| 4/23/2019 21:34 | 0.6    | -0.2333 | 3.9192 | -0.5833 | 0.5913 | 6      | 0.1869 | -0.7418 |
| 4/23/2019 21:35 | 0.6    | -0.45   | 3.5989 | -0.3833 | 0.5913 | 5.9333 | 0.1757 | -0.7418 |
| 4/23/2019 21:36 | 0.6917 | -0.1167 | 3.5554 | -1.2167 | 0.5913 | 5.925  | 0.1877 | -0.7418 |
| 4/23/2019 21:37 | 0.6917 | 0.0833  | 3.6331 | -0.5333 | 0.5913 | 5.9    | 0.179  | -0.7418 |
| 4/23/2019 21:38 | 0.6167 | -0.1    | 3.8011 | -0.7167 | 0.5913 | 5.9    | 0.1839 | -0.7418 |
| 4/23/2019 21:39 | 0.6    | -0.3667 | 3.5312 | -0.9    | 0.5913 | 5.9909 | 0.1892 | -0.7418 |
| 4/23/2019 21:40 | 0.6    | -0.8833 | 3.6252 | -0.1833 | 0.5913 | 6      | 0.1788 | -0.7418 |
| 4/23/2019 21:41 | 0.6    | -0.4167 | 3.4541 | -0.6667 | 0.5913 | 6.0667 | 0.1914 | -0.7418 |
| 4/23/2019 21:42 | 0.675  | 0.2667  | 3.691  | -0.4333 | 0.5913 | 6.09   | 0.1753 | -0.7418 |
| 4/23/2019 21:43 | 0.7    | -0.0833 | 3.8705 | -0.3333 | 0.5913 | 6.1    | 0.1872 | -0.7418 |
| 4/23/2019 21:44 | 0.75   | -0.55   | 3.7738 | 0.15    | 0.5913 | 6.1    | 0.1867 | -0.7418 |
| 4/23/2019 21:45 | 0.7    | -0.1333 | 3.9909 | -0.1833 | 0.5913 | 6.1    | 0.1749 | -0.7418 |
| 4/23/2019 21:46 | 0.7583 | -0.2333 | 3.7898 | -0.5667 | 0.5913 | 6.1    | 0.1886 | -0.7418 |
| 4/23/2019 21:47 | 0.725  | -0.25   | 3.2707 | -0.5167 | 0.5913 | 6.1    | 0.1794 | -0.7418 |

|                 |        |         |        |         |        |        |        |         |
|-----------------|--------|---------|--------|---------|--------|--------|--------|---------|
| 4/23/2019 21:48 | 0.8    | -0.6833 | 3.5802 | -1.1167 | 0.5913 | 6.1    | 0.188  | -0.7418 |
| 4/23/2019 21:49 | 0.8    | -0.4333 | 3.5667 | -0.6167 | 0.5913 | 6.1    | 0.1885 | -0.7418 |
| 4/23/2019 21:50 | 0.7333 | 0.4167  | 3.7065 | -0.3167 | 0.5913 | 6.1    | 0.1815 | -0.7418 |
| 4/23/2019 21:51 | 0.7    | -0.5167 | 3.9008 | -0.1833 | 0.5913 | 6.04   | 0.1909 | -0.7418 |
| 4/23/2019 21:52 | 0.7    | -0.5    | 3.694  | -0.3167 | 0.5913 | 6.02   | 0.1786 | -0.7418 |
| 4/23/2019 21:53 | 0.725  | -0.2667 | 3.6453 | -0.5833 | 0.5913 | 6      | 0.195  | -0.7418 |
| 4/23/2019 21:54 | 0.8    | -0.4333 | 3.6624 | 0.2333  | 0.5913 | 6.0636 | 0.1782 | -0.7418 |
| 4/23/2019 21:55 | 0.8    | -0.45   | 3.6526 | -0.4333 | 0.5913 | 6.1    | 0.187  | -0.7418 |
| 4/23/2019 21:56 | 0.725  | -0.7    | 3.8492 | -0.0833 | 0.5913 | 6.1364 | 0.1918 | -0.7418 |
| 4/23/2019 21:57 | 0.65   | -0.8167 | 3.7351 | 0.4833  | 0.5913 | 6.2    | 0.1747 | -0.7418 |
| 4/23/2019 21:58 | 0.675  | -0.2833 | 3.4163 | 0.1333  | 0.5913 | 6.2    | 0.1909 | -0.7418 |
| 4/23/2019 21:59 | 0.6167 | -1.05   | 3.5087 | -0.7833 | 0.5913 | 6.2727 | 0.1841 | -0.7418 |
| 4/23/2019 22:00 | 0.6    | -0.2    | 3.5361 | -0.0333 | 0.5913 | 6.3    | 0.1811 | -0.7418 |
| 4/23/2019 22:01 | 0.5417 | -0.1    | 3.5463 | -0.75   | 0.5913 | 6.3273 | 0.1941 | -0.7418 |
| 4/23/2019 22:02 | 0.5833 | -0.7    | 3.5425 | -0.2167 | 0.5913 | 6.4    | 0.178  | -0.7418 |
| 4/23/2019 22:03 | 0.6    | -1.0667 | 3.4706 | -0.1333 | 0.5913 | 6.4    | 0.1924 | -0.7418 |
| 4/23/2019 22:04 | 0.6    | -1.0333 | 3.4402 | -0.3833 | 0.5913 | 6.4    | 0.1812 | -0.7418 |
| 4/23/2019 22:05 | 0.6    | 0.1     | 3.4858 | -0.5833 | 0.5913 | 6.4    | 0.1904 | -0.7418 |
| 4/23/2019 22:06 | 0.6583 | -0.5667 | 3.5128 | -0.4667 | 0.5913 | 6.4    | 0.1922 | -0.7418 |
| 4/23/2019 22:07 | 0.6083 | -0.5333 | 3.3282 | -0.3667 | 0.5913 | 6.4    | 0.1749 | -0.7418 |
| 4/23/2019 22:08 | 0.6    | -0.8833 | 3.5803 | -0.3833 | 0.5913 | 6.4    | 0.2004 | -0.7418 |
| 4/23/2019 22:09 | 0.6    | 0.1     | 3.7569 | -0.6167 | 0.5913 | 6.4    | 0.1819 | -0.7418 |
| 4/23/2019 22:10 | 0.6417 | -0.3833 | 3.3396 | -0.6167 | 0.5913 | 6.4    | 0.1858 | -0.7418 |
| 4/23/2019 22:11 | 0.6417 | -0.2    | 3.5728 | 0.0167  | 0.5913 | 6.4    | 0.1874 | -0.7418 |
| 4/23/2019 22:12 | 0.6333 | -0.05   | 3.5173 | -0.2333 | 0.5913 | 6.4    | 0.1784 | -0.7418 |
| 4/23/2019 22:13 | 0.675  | -0.25   | 3.7168 | 0.2     | 0.5913 | 6.4    | 0.1954 | -0.7418 |
| 4/23/2019 22:14 | 0.7    | 0.1667  | 2.9424 | 0.1333  | 0.5913 | 6.4    | 0.1731 | -0.7418 |
| 4/23/2019 22:15 | 0.7    | -0.1667 | 3.3643 | 0.6     | 0.5913 | 6.4    | 0.1899 | -0.7418 |
| 4/23/2019 22:16 | 0.7    | -0.7333 | 3.4797 | -0.4667 | 0.5913 | 6.4    | 0.1894 | -0.7418 |
| 4/23/2019 22:17 | 0.7    | 0.0667  | 3.844  | -0.6833 | 0.5913 | 6.4    | 0.1842 | -0.7418 |
| 4/23/2019 22:18 | 0.7    | -0.7833 | 3.4503 | -0.2    | 0.5913 | 6.4    | 0.1878 | -0.7418 |
| 4/23/2019 22:19 | 0.7    | -0.35   | 3.6607 | -0.5833 | 0.5913 | 6.4    | 0.1784 | -0.7418 |
| 4/23/2019 22:20 | 0.7    | -0.4    | 3.264  | -0.2167 | 0.5913 | 6.39   | 0.1907 | -0.7418 |
| 4/23/2019 22:21 | 0.7    | -0.1833 | 3.4872 | -0.6333 | 0.5913 | 6.3417 | 0.1888 | -0.7418 |
| 4/23/2019 22:22 | 0.7    | -0.4    | 3.3126 | -0.4    | 0.5913 | 6.3091 | 0.1777 | -0.7418 |
| 4/23/2019 22:23 | 0.7    | 0.1167  | 3.6849 | 0.15    | 0.5913 | 6.3    | 0.1917 | -0.7418 |
| 4/23/2019 22:24 | 0.7    | -0.95   | 3.6943 | 0.0333  | 0.5913 | 6.3    | 0.1799 | -0.7418 |
| 4/23/2019 22:25 | 0.625  | -0.3833 | 3.6527 | -0.4167 | 0.5913 | 6.3    | 0.1853 | -0.7418 |
| 4/23/2019 22:26 | 0.6167 | -0.6    | 3.6586 | -0.2833 | 0.5913 | 6.3    | 0.1837 | -0.7418 |
| 4/23/2019 22:27 | 0.5917 | 0.1333  | 3.4445 | 0.1333  | 0.5913 | 6.3    | 0.1752 | -0.7418 |
| 4/23/2019 22:28 | 0.6    | -0.4333 | 3.7097 | -0.85   | 0.5913 | 6.3    | 0.1922 | -0.7418 |
| 4/23/2019 22:29 | 0.625  | -0.9333 | 3.5195 | -0.7833 | 0.5913 | 6.3    | 0.1776 | -0.7418 |
| 4/23/2019 22:30 | 0.7    | -0.45   | 3.4443 | -0.45   | 0.5913 | 6.3    | 0.1902 | -0.7418 |
| 4/23/2019 22:31 | 0.6333 | -0.5    | 3.4438 | -0.7667 | 0.5913 | 6.3    | 0.1836 | -0.7418 |
| 4/23/2019 22:32 | 0.625  | -0.0333 | 3.4422 | -0.0667 | 0.5913 | 6.3091 | 0.1783 | -0.7418 |
| 4/23/2019 22:33 | 0.6    | -0.25   | 3.4828 | -0.2667 | 0.5913 | 6.4    | 0.1867 | -0.7418 |
| 4/23/2019 22:34 | 0.6    | -0.1833 | 3.3747 | -0.0667 | 0.5913 | 6.4    | 0.174  | -0.7418 |

|                 |        |         |        |         |        |        |        |         |
|-----------------|--------|---------|--------|---------|--------|--------|--------|---------|
| 4/23/2019 22:35 | 0.5917 | -0.75   | 3.5569 | -0.3167 | 0.5913 | 6.475  | 0.1797 | -0.7418 |
| 4/23/2019 22:36 | 0.575  | -0.4    | 3.6937 | -0.3    | 0.5913 | 6.4091 | 0.181  | -0.7418 |
| 4/23/2019 22:37 | 0.6    | -0.6    | 3.3205 | -0.25   | 0.5913 | 6.4333 | 0.1788 | -0.7418 |
| 4/23/2019 22:38 | 0.6    | -0.4    | 3.5969 | -0.6833 | 0.5913 | 6.5    | 0.1876 | -0.7418 |
| 4/23/2019 22:39 | 0.6083 | -0.25   | 3.5582 | -0.4333 | 0.5913 | 6.4727 | 0.178  | -0.7418 |
| 4/23/2019 22:40 | 0.6583 | -0.9333 | 3.8017 | -0.3167 | 0.5913 | 6.46   | 0.1857 | -0.7418 |
| 4/23/2019 22:41 | 0.6917 | -0.2    | 3.5852 | -0.25   | 0.5913 | 6.4    | 0.1821 | -0.7418 |
| 4/23/2019 22:42 | 0.7    | -0.4667 | 3.7441 | -0.5833 | 0.5913 | 6.4    | 0.1789 | -0.7418 |
| 4/23/2019 22:43 | 0.7    | -0.9    | 3.5617 | -0.4667 | 0.5913 | 6.4    | 0.1871 | -0.7418 |
| 4/23/2019 22:44 | 0.7    | -0.3333 | 4.0516 | -0.4    | 0.5913 | 6.4    | 0.1776 | -0.7418 |
| 4/23/2019 22:45 | 0.7    | -0.4333 | 3.7292 | -0.45   | 0.5913 | 6.3545 | 0.1812 | -0.7418 |
| 4/23/2019 22:46 | 0.7    | -1.3167 | 3.5393 | -0.8833 | 0.5913 | 6.3    | 0.1903 | -0.7418 |
| 4/23/2019 22:47 | 0.7    | -0.45   | 3.4778 | -0.5167 | 0.5913 | 6.3    | 0.1744 | -0.7418 |
| 4/23/2019 22:48 | 0.7    | -0.4167 | 3.4937 | -0.7333 | 0.5913 | 6.3    | 0.1906 | -0.7418 |
| 4/23/2019 22:49 | 0.7    | -0.55   | 3.4818 | -0.7167 | 0.5913 | 6.3    | 0.1837 | -0.7418 |
| 4/23/2019 22:50 | 0.725  | 0.0333  | 3.8529 | -0.3167 | 0.5913 | 6.3    | 0.1848 | -0.7418 |
| 4/23/2019 22:51 | 0.7    | 0.05    | 3.7446 | 0.2167  | 0.5913 | 6.3    | 0.1825 | -0.7418 |
| 4/23/2019 22:52 | 0.7    | -0.45   | 3.6242 | -0.5833 | 0.5913 | 6.3    | 0.1759 | -0.7418 |
| 4/23/2019 22:53 | 0.7    | -0.3667 | 3.6524 | -0.2667 | 0.5913 | 6.3    | 0.1856 | -0.7418 |
| 4/23/2019 22:54 | 0.7    | -0.7167 | 3.4776 | -0.1667 | 0.5913 | 6.3    | 0.1713 | -0.7418 |
| 4/23/2019 22:55 | 0.7    | -0.55   | 3.5718 | -0.1667 | 0.5913 | 6.3    | 0.1855 | -0.7418 |
| 4/23/2019 22:56 | 0.7    | -0.4    | 3.3521 | -0.5833 | 0.5913 | 6.3    | 0.1831 | -0.7418 |
| 4/23/2019 22:57 | 0.7667 | -0.3    | 3.5157 | -0.45   | 0.5913 | 6.3    | 0.1747 | -0.7418 |
| 4/23/2019 22:58 | 0.8    | -0.3    | 3.5531 | -0.1167 | 0.5913 | 6.3    | 0.1886 | -0.7418 |
| 4/23/2019 22:59 | 0.8    | 0.0833  | 3.6373 | 0.2     | 0.5913 | 6.3    | 0.1747 | -0.7418 |
| 4/23/2019 23:00 | 0.8    | -0.5167 | 3.6123 | 0       | 0.5913 | 6.3    | 0.1855 | -0.7418 |
| 4/23/2019 23:01 | 0.8    | -0.65   | 3.688  | -0.35   | 0.5913 | 6.3    | 0.1828 | -0.7418 |
| 4/23/2019 23:02 | 0.8    | 0.5167  | 3.8141 | -0.4833 | 0.5913 | 6.3    | 0.1836 | -0.7418 |
| 4/23/2019 23:03 | 0.75   | -0.6    | 3.436  | -0.5333 | 0.5913 | 6.3    | 0.189  | -0.7418 |
| 4/23/2019 23:04 | 0.7    | -0.35   | 3.5832 | -0.7833 | 0.5913 | 6.3    | 0.1699 | -0.7418 |
| 4/23/2019 23:05 | 0.7417 | 0.15    | 3.6797 | -0.6667 | 0.5913 | 6.3    | 0.1842 | -0.7418 |
| 4/23/2019 23:06 | 0.8    | -0.6667 | 3.6775 | -0.3667 | 0.5913 | 6.3727 | 0.1764 | -0.7418 |
| 4/23/2019 23:07 | 0.8333 | -0.25   | 3.2947 | 0.2167  | 0.5913 | 6.34   | 0.1846 | -0.7418 |
| 4/23/2019 23:08 | 0.8167 | -0.2    | 3.3482 | 0.0667  | 0.5913 | 6.3    | 0.1832 | -0.7418 |
| 4/23/2019 23:09 | 0.8167 | -0.2    | 3.4723 | 0.2667  | 0.5913 | 6.3    | 0.1784 | -0.7418 |
| 4/23/2019 23:10 | 0.9    | 0.0333  | 3.3487 | -0.45   | 0.5913 | 6.3    | 0.1902 | -0.7418 |
| 4/23/2019 23:11 | 0.9    | -0.3167 | 3.733  | -0.1833 | 0.5913 | 6.4    | 0.1721 | -0.7418 |
| 4/23/2019 23:12 | 0.9    | -0.3333 | 3.6172 | -0.65   | 0.5913 | 6.3667 | 0.1835 | -0.7418 |
| 4/23/2019 23:13 | 0.8167 | -0.2833 | 3.4485 | -0.4333 | 0.5913 | 6.3    | 0.1879 | -0.7418 |
| 4/23/2019 23:14 | 0.8    | -0.1167 | 3.5257 | 0.05    | 0.5913 | 6.3    | 0.1707 | -0.7418 |
| 4/23/2019 23:15 | 0.8    | -1.1667 | 3.5978 | -0.85   | 0.5913 | 6.3    | 0.1854 | -0.7418 |
| 4/23/2019 23:16 | 0.8    | -0.5333 | 3.4222 | -0.4167 | 0.5913 | 6.3    | 0.1793 | -0.7418 |
| 4/23/2019 23:17 | 0.8    | -0.5167 | 3.634  | -0.1833 | 0.5913 | 6.3    | 0.1808 | -0.7418 |
| 4/23/2019 23:18 | 0.8    | -0.3333 | 3.4095 | -0.4167 | 0.5913 | 6.3    | 0.1827 | -0.7418 |
| 4/23/2019 23:19 | 0.8    | -0.6167 | 3.6368 | -0.6167 | 0.5913 | 6.2182 | 0.1768 | -0.7418 |
| 4/23/2019 23:20 | 0.8    | -0.6667 | 3.421  | -0.1833 | 0.5913 | 6.25   | 0.1887 | -0.7418 |
| 4/23/2019 23:21 | 0.8    | -0.5333 | 3.7097 | -0.5833 | 0.5913 | 6.2    | 0.1737 | -0.7418 |

|                 |        |         |        |         |        |        |        |         |
|-----------------|--------|---------|--------|---------|--------|--------|--------|---------|
| 4/23/2019 23:22 | 0.8    | 0.0333  | 3.4882 | -0.1167 | 0.5913 | 6.2    | 0.183  | -0.7418 |
| 4/23/2019 23:23 | 0.8    | -0.2    | 3.3813 | -0.1333 | 0.5913 | 6.2    | 0.1866 | -0.7418 |
| 4/23/2019 23:24 | 0.7167 | -0.5    | 3.7638 | -0.6667 | 0.5913 | 6.2    | 0.1745 | -0.7418 |
| 4/23/2019 23:25 | 0.7    | -1.1833 | 3.5    | -0.15   | 0.5913 | 6.2    | 0.1869 | -0.7418 |
| 4/23/2019 23:26 | 0.7    | 0.1     | 3.2988 | -0.3667 | 0.5913 | 6.2    | 0.1805 | -0.7418 |
| 4/23/2019 23:27 | 0.7    | -0.3833 | 3.5007 | 0.05    | 0.5913 | 6.2    | 0.1894 | -0.7418 |
| 4/23/2019 23:28 | 0.7    | -0.2833 | 3.4493 | -0.15   | 0.5913 | 6.2    | 0.1782 | -0.7418 |
| 4/23/2019 23:29 | 0.6083 | -0.2    | 3.2467 | -0.1    | 0.5913 | 6.2    | 0.179  | -0.7418 |
| 4/23/2019 23:30 | 0.6833 | 0.1833  | 3.6102 | -0.4833 | 0.5913 | 6.2167 | 0.1877 | -0.7418 |
| 4/23/2019 23:31 | 0.7    | -0.3667 | 3.5217 | -0.25   | 0.5913 | 6.2667 | 0.1758 | -0.7418 |
| 4/23/2019 23:32 | 0.7    | -0.5667 | 3.4885 | -0.0333 | 0.5913 | 6.2    | 0.1893 | -0.7418 |
| 4/23/2019 23:33 | 0.7    | -0.35   | 3.4242 | -0.05   | 0.5913 | 6.2    | 0.1711 | -0.7418 |
| 4/23/2019 23:34 | 0.7    | -0.65   | 3.6357 | -0.0333 | 0.5913 | 6.2    | 0.1866 | -0.7418 |
| 4/23/2019 23:35 | 0.7    | -0.3333 | 3.4658 | -0.15   | 0.5913 | 6.2    | 0.1822 | -0.7418 |
| 4/23/2019 23:36 | 0.6667 | -0.6167 | 3.6255 | -0.2667 | 0.5913 | 6.1083 | 0.1807 | -0.7418 |
| 4/23/2019 23:37 | 0.625  | -0.4833 | 3.5955 | -0.3333 | 0.5913 | 6.1    | 0.1845 | -0.7418 |
| 4/23/2019 23:38 | 0.6083 | -0.6167 | 3.3238 | -0.6    | 0.5913 | 6.1    | 0.1779 | -0.7418 |
| 4/23/2019 23:39 | 0.6    | -0.7167 | 3.7107 | -0.35   | 0.5913 | 6.1333 | 0.1911 | -0.7418 |
| 4/23/2019 23:40 | 0.5833 | -0.2333 | 3.3507 | -0.3333 | 0.5913 | 6.1    | 0.1709 | -0.7418 |
| 4/23/2019 23:41 | 0.5583 | -0.0667 | 3.4248 | -0.3167 | 0.5913 | 6.1    | 0.1883 | -0.7418 |
| 4/23/2019 23:42 | 0.6    | -0.4    | 3.4693 | -0.2333 | 0.5913 | 6.1    | 0.186  | -0.7418 |
| 4/23/2019 23:43 | 0.625  | -0.5667 | 3.304  | -0.4333 | 0.5913 | 6.1    | 0.1819 | -0.7418 |
| 4/23/2019 23:44 | 0.7    | -0.05   | 3.3793 | -0.95   | 0.5913 | 6.1    | 0.1895 | -0.7418 |
| 4/23/2019 23:45 | 0.675  | -0.5667 | 3.4278 | 0.1167  | 0.5913 | 6.1    | 0.1751 | -0.7418 |
| 4/23/2019 23:46 | 0.6917 | -0.0667 | 3.433  | -0.1667 | 0.5913 | 6.1    | 0.188  | -0.7418 |
| 4/23/2019 23:47 | 0.7    | -0.3    | 3.5512 | -0.3167 | 0.5913 | 6.1    | 0.1862 | -0.7418 |
| 4/23/2019 23:48 | 0.7583 | -0.7167 | 3.4667 | -0.2833 | 0.5913 | 6.1    | 0.1803 | -0.7418 |
| 4/23/2019 23:49 | 0.7333 | -0.3667 | 3.734  | -0.2167 | 0.5913 | 6.1    | 0.1872 | -0.7418 |
| 4/23/2019 23:50 | 0.7    | -0.4833 | 3.3672 | -0.55   | 0.5913 | 6.1364 | 0.1753 | -0.7418 |
| 4/23/2019 23:51 | 0.7    | -0.8833 | 3.5892 | -0.1333 | 0.5913 | 6.1    | 0.1855 | -0.7418 |
| 4/23/2019 23:52 | 0.7    | -0.6833 | 3.3608 | 0.2     | 0.5913 | 6.1    | 0.1773 | -0.7418 |
| 4/23/2019 23:53 | 0.7    | -0.2667 | 3.6708 | -0.5    | 0.5913 | 6.19   | 0.1774 | -0.7418 |
| 4/23/2019 23:54 | 0.7    | -0.4    | 3.5037 | -0.9667 | 0.5913 | 6.2    | 0.1829 | -0.7418 |
| 4/23/2019 23:55 | 0.7    | -0.95   | 3.6618 | -0.4333 | 0.5913 | 6.2    | 0.176  | -0.7418 |
| 4/23/2019 23:56 | 0.7    | -0.6833 | 3.522  | -0.15   | 0.5913 | 6.2    | 0.1857 | -0.7418 |
| 4/23/2019 23:57 | 0.7    | 0.2     | 3.3443 | -0.4667 | 0.5913 | 6.2    | 0.173  | -0.7418 |
| 4/23/2019 23:58 | 0.7833 | -0.3833 | 3.515  | -0.0833 | 0.5913 | 6.2    | 0.1786 | -0.7418 |
| 4/23/2019 23:59 | 0.8    | -0.5667 | 3.3477 | -0.2833 | 0.5913 | 6.2    | 0.1873 | -0.7418 |
| 4/24/2019 0:00  | 0.8    | -0.55   | 3.5595 | -0.2167 | 0.5913 | 6.29   | 0.175  | -0.7418 |
| 4/24/2019 0:01  | 0.7583 | -0.8333 | 3.2687 | -0.6833 | 0.5913 | 6.3    | 0.1845 | -0.7418 |
| 4/24/2019 0:02  | 0.7083 | -0.3333 | 3.548  | -0.2    | 0.5913 | 6.3    | 0.1745 | -0.7418 |
| 4/24/2019 0:03  | 0.7    | -0.3333 | 3.5585 | 0.0167  | 0.5913 | 6.3    | 0.1831 | -0.7418 |
| 4/24/2019 0:04  | 0.7    | -1.4667 | 3.2767 | -0.85   | 0.5913 | 6.3    | 0.1813 | -0.7418 |
| 4/24/2019 0:05  | 0.7    | -0.5    | 3.6697 | -0.9333 | 0.5913 | 6.3    | 0.1805 | -0.7418 |
| 4/24/2019 0:06  | 0.625  | -0.7833 | 3.308  | -1.0833 | 0.5913 | 6.3    | 0.191  | -0.7418 |
| 4/24/2019 0:07  | 0.6    | -0.1667 | 3.4853 | -0.95   | 0.5913 | 6.3    | 0.175  | -0.7418 |
| 4/24/2019 0:08  | 0.6    | -0.6667 | 3.6305 | -1.0667 | 0.5913 | 6.2    | 0.1875 | -0.7418 |

|                |        |         |        |         |        |        |        |         |
|----------------|--------|---------|--------|---------|--------|--------|--------|---------|
| 4/24/2019 0:09 | 0.6    | -0.3333 | 3.4495 | -0.6167 | 0.5913 | 6.2    | 0.179  | -0.7418 |
| 4/24/2019 0:10 | 0.5917 | -0.4    | 3.288  | -0.1833 | 0.5913 | 6.2    | 0.1735 | -0.7418 |
| 4/24/2019 0:11 | 0.5333 | -0.1167 | 3.4213 | -0.2833 | 0.5913 | 6.2    | 0.1881 | -0.7418 |
| 4/24/2019 0:12 | 0.5083 | -0.8833 | 3.4042 | -0.1833 | 0.5913 | 6.2    | 0.1764 | -0.7418 |
| 4/24/2019 0:13 | 0.5917 | -0.3833 | 3.5017 | -0.4333 | 0.5913 | 6.19   | 0.1809 | -0.7418 |
| 4/24/2019 0:14 | 0.5167 | -0.9833 | 3.3533 | -0.05   | 0.5913 | 6.1    | 0.1736 | -0.7418 |
| 4/24/2019 0:15 | 0.5    | 0.05    | 3.344  | -0.0667 | 0.5913 | 6.1091 | 0.186  | -0.7418 |
| 4/24/2019 0:16 | 0.575  | -0.05   | 3.1992 | -0.1333 | 0.5913 | 6.1667 | 0.1802 | -0.7418 |
| 4/24/2019 0:17 | 0.6    | -0.45   | 3.0613 | -0.5333 | 0.5913 | 6.1    | 0.1791 | -0.7418 |
| 4/24/2019 0:18 | 0.6    | 0.0667  | 3.5582 | -0.9167 | 0.5913 | 6.125  | 0.1893 | -0.7418 |
| 4/24/2019 0:19 | 0.5167 | -0.5833 | 3.5095 | -0.3167 | 0.5913 | 6.2    | 0.1741 | -0.7418 |
| 4/24/2019 0:20 | 0.5    | -0.4667 | 3.3288 | -0.9667 | 0.5913 | 6.2455 | 0.1915 | -0.7418 |
| 4/24/2019 0:21 | 0.5    | -0.7333 | 3.7855 | -0.3667 | 0.5913 | 6.3    | 0.1818 | -0.7418 |
| 4/24/2019 0:22 | 0.5917 | -0.6167 | 3.2803 | -0.4333 | 0.5913 | 6.3    | 0.1796 | -0.7418 |
| 4/24/2019 0:23 | 0.5917 | -0.7167 | 3.2413 | -0.7    | 0.5913 | 6.3    | 0.1882 | -0.7418 |
| 4/24/2019 0:24 | 0.575  | -0.5833 | 3.2945 | -0.2333 | 0.5913 | 6.3    | 0.174  | -0.7418 |
| 4/24/2019 0:25 | 0.5583 | -0.3    | 3.0387 | -0.5667 | 0.5913 | 6.3    | 0.1861 | -0.7418 |
| 4/24/2019 0:26 | 0.5917 | -0.3    | 3.4925 | -0.0167 | 0.5913 | 6.3    | 0.1753 | -0.7418 |
| 4/24/2019 0:27 | 0.6    | -0.2833 | 3.2942 | -0.45   | 0.5913 | 6.3222 | 0.1796 | -0.7418 |
| 4/24/2019 0:28 | 0.6    | -0.1333 | 3.2993 | -0.0667 | 0.5913 | 6.3    | 0.1846 | -0.7418 |
| 4/24/2019 0:29 | 0.6333 | -1.1    | 3.4927 | -0.6667 | 0.5913 | 6.3    | 0.1751 | -0.7418 |
| 4/24/2019 0:30 | 0.7    | -0.9833 | 3.0027 | 0.1667  | 0.5913 | 6.3455 | 0.1951 | -0.7418 |
| 4/24/2019 0:31 | 0.6167 | 0.1333  | 3.2133 | -0.6833 | 0.5913 | 6.3    | 0.17   | -0.7418 |
| 4/24/2019 0:32 | 0.6    | -0.45   | 3.3104 | -0.4333 | 0.5913 | 6.3    | 0.183  | -0.7418 |
| 4/24/2019 0:33 | 0.6083 | -0.2667 | 3.4585 | -0.4667 | 0.5913 | 6.3    | 0.1797 | -0.7418 |
| 4/24/2019 0:34 | 0.675  | -0.8833 | 3.4143 | -0.8    | 0.5913 | 6.3    | 0.1745 | -0.7418 |
| 4/24/2019 0:35 | 0.7    | -0.8    | 3.3752 | -0.3    | 0.5913 | 6.3    | 0.1883 | -0.7418 |
| 4/24/2019 0:36 | 0.7    | -0.0833 | 3.0892 | -0.2333 | 0.5913 | 6.3    | 0.172  | -0.7418 |
| 4/24/2019 0:37 | 0.7    | -0.55   | 3.4658 | -0.0833 | 0.5913 | 6.3    | 0.1814 | -0.7418 |
| 4/24/2019 0:38 | 0.7    | -0.5167 | 3.2498 | -0.2    | 0.5913 | 6.3    | 0.1783 | -0.7418 |
| 4/24/2019 0:39 | 0.7    | -0.4333 | 3.3558 | -0.0667 | 0.5913 | 6.3    | 0.177  | -0.7418 |
| 4/24/2019 0:40 | 0.7    | -0.2833 | 3.5297 | -0.3    | 0.5913 | 6.3    | 0.1853 | -0.7418 |
| 4/24/2019 0:41 | 0.7    | 0.0167  | 3.4949 | 0.3333  | 0.5913 | 6.3    | 0.1692 | -0.7418 |
| 4/24/2019 0:42 | 0.7    | -0.7167 | 3.0721 | -0.3833 | 0.5913 | 6.3    | 0.1831 | -0.7418 |
| 4/24/2019 0:43 | 0.675  | -0.1333 | 3.1143 | -0.45   | 0.5913 | 6.3    | 0.1718 | -0.7418 |
| 4/24/2019 0:44 | 0.7    | -0.85   | 3.5823 | 0.1167  | 0.5913 | 6.3182 | 0.1836 | -0.7418 |
| 4/24/2019 0:45 | 0.7    | 0       | 3.4226 | -0.3333 | 0.5913 | 6.3    | 0.1763 | -0.7418 |
| 4/24/2019 0:46 | 0.65   | -0.2667 | 3.278  | -0.5    | 0.5913 | 6.3    | 0.173  | -0.7418 |
| 4/24/2019 0:47 | 0.6    | -0.85   | 3.3385 | -0.75   | 0.5913 | 6.3    | 0.1935 | -0.7418 |
| 4/24/2019 0:48 | 0.5667 | 0.05    | 3.3787 | -0.1333 | 0.5913 | 6.3    | 0.1708 | -0.7418 |
| 4/24/2019 0:49 | 0.5417 | -0.5667 | 3.5325 | -1.3333 | 0.5913 | 6.3273 | 0.1825 | -0.7418 |
| 4/24/2019 0:50 | 0.6    | -0.0333 | 3.5933 | -1      | 0.5913 | 6.3273 | 0.1735 | -0.7418 |
| 4/24/2019 0:51 | 0.6    | -0.25   | 3.0866 | -0.0167 | 0.5913 | 6.33   | 0.1742 | -0.7418 |
| 4/24/2019 0:52 | 0.6    | -0.3833 | 3.2463 | -0.3833 | 0.5913 | 6.3    | 0.182  | -0.7418 |
| 4/24/2019 0:53 | 0.5917 | -0.0333 | 3.3031 | -1.1    | 0.5913 | 6.4    | 0.1671 | -0.7418 |
| 4/24/2019 0:54 | 0.6    | -0.9667 | 3.4508 | -0.7667 | 0.5913 | 6.4    | 0.1867 | -0.7418 |
| 4/24/2019 0:55 | 0.6    | -0.8833 | 3.2276 | -0.4667 | 0.5913 | 6.4    | 0.1775 | -0.7418 |

|                |        |         |        |         |        |        |        |         |
|----------------|--------|---------|--------|---------|--------|--------|--------|---------|
| 4/24/2019 0:56 | 0.6    | -0.5667 | 3.0401 | -0.8333 | 0.5913 | 6.4    | 0.1761 | -0.7418 |
| 4/24/2019 0:57 | 0.6    | -0.5667 | 2.9788 | -0.45   | 0.5913 | 6.4    | 0.1812 | -0.7418 |
| 4/24/2019 0:58 | 0.6    | -0.55   | 3.1512 | -0.2667 | 0.5913 | 6.4    | 0.175  | -0.7418 |
| 4/24/2019 0:59 | 0.6    | -0.95   | 3.5395 | 0.3333  | 0.5913 | 6.4    | 0.1795 | -0.7418 |
| 4/24/2019 1:00 | 0.6    | -0.8    | 3.2554 | -0.3667 | 0.5913 | 6.4    | 0.1742 | -0.7418 |
| 4/24/2019 1:01 | 0.6    | -0.35   | 3.2582 | -0.3167 | 0.5913 | 6.4    | 0.1705 | -0.7418 |
| 4/24/2019 1:02 | 0.6    | -0.75   | 3.3347 | -0.3833 | 0.5913 | 6.4    | 0.182  | -0.7418 |
| 4/24/2019 1:03 | 0.6    | -0.5333 | 3.4291 | -0.3    | 0.5913 | 6.4    | 0.1595 | -0.7418 |
| 4/24/2019 1:04 | 0.6    | -0.4333 | 3.0462 | -0.1833 | 0.5913 | 6.4    | 0.1757 | -0.7418 |
| 4/24/2019 1:05 | 0.6    | -0.9333 | 3.2876 | -1.0333 | 0.5913 | 6.4    | 0.1759 | -0.7418 |
| 4/24/2019 1:06 | 0.6    | 0.4167  | 3.1657 | -0.8    | 0.5913 | 6.4    | 0.1753 | -0.7418 |
| 4/24/2019 1:07 | 0.6    | -0.2333 | 2.8573 | -0.6    | 0.5913 | 6.4    | 0.1818 | -0.7418 |
| 4/24/2019 1:08 | 0.6    | 0.2333  | 3.0016 | 0.0333  | 0.5913 | 6.4    | 0.1644 | -0.7418 |
| 4/24/2019 1:09 | 0.6    | 0.5     | 2.9177 | -0.2167 | 0.5913 | 6.4    | 0.1782 | -0.7418 |
| 4/24/2019 1:10 | 0.6    | -0.4833 | 3.0365 | -0.5333 | 0.5913 | 6.4    | 0.1735 | -0.7418 |
| 4/24/2019 1:11 | 0.6    | -1.05   | 2.8525 | 0.1     | 0.5913 | 6.4    | 0.1766 | -0.7418 |
| 4/24/2019 1:12 | 0.6583 | 0.2     | 3.1307 | -0.5333 | 0.5913 | 6.4    | 0.1806 | -0.7418 |
| 4/24/2019 1:13 | 0.7    | -0.25   | 3.2204 | -0.1667 | 0.5913 | 6.3727 | 0.1658 | -0.7418 |
| 4/24/2019 1:14 | 0.7    | -0.75   | 3.1132 | -0.6333 | 0.5913 | 6.3    | 0.181  | -0.7418 |
| 4/24/2019 1:15 | 0.7    | -0.5    | 3.2697 | -0.5833 | 0.5913 | 6.3    | 0.1655 | -0.7418 |
| 4/24/2019 1:16 | 0.7    | -1.1    | 2.981  | -0.3    | 0.5913 | 6.3    | 0.1794 | -0.7418 |
| 4/24/2019 1:17 | 0.7    | -0.8    | 3.1662 | 0.2167  | 0.5913 | 6.3    | 0.1765 | -0.7418 |
| 4/24/2019 1:18 | 0.7    | -0.2833 | 3.1679 | -0.9333 | 0.5913 | 6.28   | 0.1666 | -0.7418 |
| 4/24/2019 1:19 | 0.7    | 0.3167  | 3.275  | -0.7667 | 0.5913 | 6.2556 | 0.1743 | -0.7418 |
| 4/24/2019 1:20 | 0.7    | -0.6    | 3.3342 | -0.9167 | 0.5913 | 6.3    | 0.1656 | -0.7418 |
| 4/24/2019 1:21 | 0.7    | -0.0333 | 3.1413 | -0.6333 | 0.5913 | 6.24   | 0.184  | -0.7418 |
| 4/24/2019 1:22 | 0.7    | -0.7333 | 3.4031 | -0.95   | 0.5913 | 6.2    | 0.1688 | -0.7418 |
| 4/24/2019 1:23 | 0.7    | -0.0833 | 3.1379 | -0.0667 | 0.5913 | 6.2    | 0.1789 | -0.7418 |
| 4/24/2019 1:24 | 0.7    | 0.05    | 3.0153 | -0.2833 | 0.5913 | 6.2    | 0.1778 | -0.7418 |
| 4/24/2019 1:25 | 0.7    | -0.8333 | 3.3068 | -0.7    | 0.5913 | 6.2    | 0.1629 | -0.7418 |
| 4/24/2019 1:26 | 0.7    | -0.1833 | 3.1904 | -0.45   | 0.5913 | 6.2    | 0.1777 | -0.7418 |
| 4/24/2019 1:27 | 0.7    | 0.1333  | 3.0097 | -0.6833 | 0.5913 | 6.1444 | 0.1684 | -0.7418 |
| 4/24/2019 1:28 | 0.7    | 0.4167  | 3.1354 | -0.5833 | 0.5913 | 6.1091 | 0.178  | -0.7418 |
| 4/24/2019 1:29 | 0.7    | -0.35   | 3.0544 | -0.5667 | 0.5913 | 6.2    | 0.1837 | -0.7418 |
| 4/24/2019 1:30 | 0.6833 | -0.5833 | 2.9849 | -0.2667 | 0.5913 | 6.2    | 0.1679 | -0.7418 |
| 4/24/2019 1:31 | 0.7    | -0.5167 | 3.181  | -0.0333 | 0.5913 | 6.2    | 0.1761 | -0.7418 |
| 4/24/2019 1:32 | 0.6333 | -0.9167 | 3.2149 | -0.3    | 0.5913 | 6.2    | 0.1653 | -0.7418 |
| 4/24/2019 1:33 | 0.6    | -0.9833 | 3.0577 | -0.4833 | 0.5913 | 6.2091 | 0.1742 | -0.7418 |
| 4/24/2019 1:34 | 0.6    | -0.9    | 3.2552 | -0.3833 | 0.5913 | 6.3    | 0.1757 | -0.7418 |
| 4/24/2019 1:35 | 0.6    | 0.2667  | 3.4073 | 0.0333  | 0.5913 | 6.3    | 0.1708 | -0.7418 |
| 4/24/2019 1:36 | 0.6    | 0.2167  | 3.1068 | -0.4    | 0.5913 | 6.4    | 0.181  | -0.7418 |
| 4/24/2019 1:37 | 0.6417 | 0.3     | 3.1228 | -0.05   | 0.5913 | 6.4    | 0.1658 | -0.7418 |
| 4/24/2019 1:38 | 0.6333 | -1.0833 | 3.2884 | -0.5    | 0.5913 | 6.4182 | 0.1789 | -0.7418 |
| 4/24/2019 1:39 | 0.6182 | -0.6167 | 3.1622 | -0.3833 | 0.5913 | 6.5    | 0.1774 | -0.7418 |
| 4/24/2019 1:40 | 0.65   | -0.3333 | 3.1804 | -0.6    | 0.5913 | 6.5    | 0.1725 | -0.7418 |
| 4/24/2019 1:41 | 0.7    | -0.1667 | 2.9186 | -0.8333 | 0.5913 | 6.5    | 0.1816 | -0.7418 |
| 4/24/2019 1:42 | 0.7    | -0.7667 | 3.1085 | -0.4167 | 0.5913 | 6.5    | 0.174  | -0.7418 |



|                |        |         |        |         |        |        |        |         |
|----------------|--------|---------|--------|---------|--------|--------|--------|---------|
| 4/24/2019 1:43 | 0.7    | -0.8167 | 2.9743 | 0.1333  | 0.5913 | 6.5    | 0.185  | -0.7418 |
| 4/24/2019 1:44 | 0.6833 | -0.5667 | 2.8988 | -0.5    | 0.5913 | 6.5    | 0.1702 | -0.7418 |
| 4/24/2019 1:45 | 0.6833 | -0.7667 | 3.1761 | -0.6167 | 0.5913 | 6.5    | 0.1713 | -0.7418 |
| 4/24/2019 1:46 | 0.675  | -0.9    | 3.174  | -0.2833 | 0.5913 | 6.5    | 0.1859 | -0.7418 |
| 4/24/2019 1:47 | 0.7    | -1.1333 | 3.246  | -0.35   | 0.5913 | 6.5    | 0.1668 | -0.7418 |
| 4/24/2019 1:48 | 0.7    | 0.2167  | 2.9053 | -0.2    | 0.5913 | 6.4636 | 0.1781 | -0.7418 |
| 4/24/2019 1:49 | 0.7    | -0.6833 | 2.9823 | -0.0667 | 0.5913 | 6.4    | 0.1697 | -0.7418 |
| 4/24/2019 1:50 | 0.6083 | -0.8167 | 3.2279 | -0.5333 | 0.5913 | 6.4    | 0.1781 | -0.7418 |
| 4/24/2019 1:51 | 0.6    | -0.4    | 3.2406 | -0.45   | 0.5913 | 6.4    | 0.1796 | -0.7418 |
| 4/24/2019 1:52 | 0.6083 | -0.3667 | 3.2958 | -0.9167 | 0.5913 | 6.4    | 0.1693 | -0.7418 |
| 4/24/2019 1:53 | 0.625  | -0.9    | 3.3173 | 0       | 0.5913 | 6.3545 | 0.1842 | -0.7418 |
| 4/24/2019 1:54 | 0.675  | -0.3667 | 3.2607 | -0.1333 | 0.5913 | 6.3    | 0.1727 | -0.7418 |
| 4/24/2019 1:55 | 0.7    | -0.8167 | 2.8131 | 0.2667  | 0.5913 | 6.3    | 0.1802 | -0.7418 |
| 4/24/2019 1:56 | 0.7    | -0.5333 | 3.2148 | -0.4333 | 0.5913 | 6.3    | 0.1786 | -0.7418 |
| 4/24/2019 1:57 | 0.7    | -0.3    | 3.1999 | -0.2333 | 0.5913 | 6.2917 | 0.1712 | -0.7418 |
| 4/24/2019 1:58 | 0.7    | -0.7    | 3.1427 | -0.2    | 0.5913 | 6.2    | 0.1842 | -0.7418 |
| 4/24/2019 1:59 | 0.7417 | -1.2    | 3.0462 | 0.0167  | 0.5913 | 6.2    | 0.1727 | -0.7418 |
| 4/24/2019 2:00 | 0.7    | -0.3167 | 2.962  | -0.2    | 0.5913 | 6.2    | 0.1799 | -0.7418 |
| 4/24/2019 2:01 | 0.7    | -0.0833 | 3.2283 | -0.4667 | 0.5913 | 6.2909 | 0.1761 | -0.7418 |
| 4/24/2019 2:02 | 0.6167 | -0.1833 | 3.3322 | 0.0167  | 0.5913 | 6.2818 | 0.1733 | -0.7418 |
| 4/24/2019 2:03 | 0.6167 | -0.5    | 3.2507 | -0.7333 | 0.5913 | 6.2333 | 0.184  | -0.7418 |
| 4/24/2019 2:04 | 0.6417 | -0.6167 | 2.9582 | -0.5333 | 0.5913 | 6.2    | 0.1708 | -0.7418 |
| 4/24/2019 2:05 | 0.6833 | -1      | 3.1945 | -0.5333 | 0.5913 | 6.2    | 0.186  | -0.7418 |
| 4/24/2019 2:06 | 0.7333 | -0.6833 | 3.1295 | 0.2     | 0.5913 | 6.2    | 0.1771 | -0.7418 |
| 4/24/2019 2:07 | 0.8    | -0.7167 | 2.9803 | -0.3667 | 0.5913 | 6.2    | 0.1811 | -0.7418 |
| 4/24/2019 2:08 | 0.775  | -0.9833 | 2.9697 | -0.6333 | 0.5913 | 6.2    | 0.18   | -0.7418 |
| 4/24/2019 2:09 | 0.725  | 0.0167  | 3.128  | -0.4167 | 0.5913 | 6.2    | 0.1723 | -0.7418 |
| 4/24/2019 2:10 | 0.7    | -0.8333 | 3.0572 | 0.15    | 0.5913 | 6.2    | 0.1809 | -0.7418 |
| 4/24/2019 2:11 | 0.7    | -0.25   | 2.8618 | -0.0167 | 0.5913 | 6.2    | 0.1738 | -0.7418 |
| 4/24/2019 2:12 | 0.7    | -0.7833 | 2.874  | -0.3    | 0.5913 | 6.2    | 0.1855 | -0.7418 |
| 4/24/2019 2:13 | 0.7    | -0.55   | 2.9533 | -0.25   | 0.5913 | 6.2    | 0.1783 | -0.7418 |
| 4/24/2019 2:14 | 0.6083 | -0.3333 | 2.8217 | -0.1    | 0.5913 | 6.2    | 0.1753 | -0.7418 |
| 4/24/2019 2:15 | 0.6    | -0.0667 | 2.7865 | -0.0167 | 0.5913 | 6.2    | 0.1836 | -0.7418 |
| 4/24/2019 2:16 | 0.6    | -0.6833 | 2.9175 | -0.2833 | 0.5913 | 6.2    | 0.1727 | -0.7418 |
| 4/24/2019 2:17 | 0.6    | 0.15    | 3.366  | -1.05   | 0.5913 | 6.2    | 0.1828 | -0.7418 |
| 4/24/2019 2:18 | 0.6167 | -0.8833 | 2.7335 | -0.2667 | 0.5913 | 6.2    | 0.1864 | -0.7418 |
| 4/24/2019 2:19 | 0.7    | -0.7    | 2.9517 | -0.4333 | 0.5913 | 6.2    | 0.1763 | -0.7418 |
| 4/24/2019 2:20 | 0.7    | -0.7667 | 2.7743 | -0.3167 | 0.5913 | 6.2    | 0.181  | -0.7418 |
| 4/24/2019 2:21 | 0.7    | -0.2167 | 3.1512 | -0.8667 | 0.5913 | 6.2    | 0.1714 | -0.7418 |
| 4/24/2019 2:22 | 0.7    | -0.0833 | 2.9673 | -0.8    | 0.5913 | 6.2    | 0.1746 | -0.7418 |
| 4/24/2019 2:23 | 0.7    | -0.6833 | 2.9802 | -0.45   | 0.5913 | 6.2    | 0.1811 | -0.7418 |
| 4/24/2019 2:24 | 0.7    | -0.1833 | 2.7545 | -0.7833 | 0.5913 | 6.2    | 0.1732 | -0.7418 |
| 4/24/2019 2:25 | 0.7083 | -0.3    | 2.943  | -0.8333 | 0.5913 | 6.2    | 0.1855 | -0.7418 |
| 4/24/2019 2:26 | 0.7083 | -0.1167 | 3.2338 | -0.65   | 0.5913 | 6.2818 | 0.1708 | -0.7418 |
| 4/24/2019 2:27 | 0.7083 | -0.8333 | 2.9637 | -0.3    | 0.5913 | 6.3    | 0.1843 | -0.7418 |
| 4/24/2019 2:28 | 0.7    | -0.6167 | 3.0808 | -0.2833 | 0.5913 | 6.3    | 0.1813 | -0.7418 |
| 4/24/2019 2:29 | 0.6333 | -0.0333 | 2.9743 | -0.3667 | 0.5913 | 6.3    | 0.1736 | -0.7418 |

|                |        |         |        |         |        |        |        |         |
|----------------|--------|---------|--------|---------|--------|--------|--------|---------|
| 4/24/2019 2:30 | 0.6    | -0.2167 | 2.9222 | -0.7333 | 0.5913 | 6.3    | 0.1874 | -0.7418 |
| 4/24/2019 2:31 | 0.6    | -0.35   | 2.9893 | -0.4333 | 0.5913 | 6.3    | 0.1693 | -0.7418 |
| 4/24/2019 2:32 | 0.6917 | -0.8833 | 3.0715 | -0.4167 | 0.5913 | 6.3    | 0.1831 | -0.7418 |
| 4/24/2019 2:33 | 0.7    | -0.7667 | 3.1982 | -0.5    | 0.5913 | 6.3    | 0.1738 | -0.7418 |
| 4/24/2019 2:34 | 0.6583 | -0.6333 | 3.0532 | -0.5167 | 0.5913 | 6.3    | 0.1786 | -0.7418 |
| 4/24/2019 2:35 | 0.6083 | -0.5167 | 3.026  | -0.6167 | 0.5913 | 6.3    | 0.1825 | -0.7418 |
| 4/24/2019 2:36 | 0.6    | -0.3333 | 2.9372 | -0.1833 | 0.5913 | 6.3    | 0.1686 | -0.7418 |
| 4/24/2019 2:37 | 0.6    | -0.95   | 3.357  | -0.95   | 0.5913 | 6.3    | 0.1835 | -0.7418 |
| 4/24/2019 2:38 | 0.6    | -0.8333 | 2.919  | -0.2833 | 0.5913 | 6.3    | 0.1683 | -0.7418 |
| 4/24/2019 2:39 | 0.6    | -0.6333 | 3.2333 | 0.35    | 0.5913 | 6.3    | 0.18   | -0.7418 |
| 4/24/2019 2:40 | 0.6    | -0.5333 | 3.0707 | -0.7167 | 0.5913 | 6.3    | 0.1808 | -0.7418 |
| 4/24/2019 2:41 | 0.6    | -0.85   | 3.0887 | -0.3    | 0.5913 | 6.3    | 0.183  | -0.7418 |
| 4/24/2019 2:42 | 0.6    | -0.7833 | 2.9457 | -0.45   | 0.5913 | 6.3    | 0.1833 | -0.7418 |
| 4/24/2019 2:43 | 0.6    | -0.0833 | 3.1092 | -0.4167 | 0.5913 | 6.3    | 0.1733 | -0.7418 |
| 4/24/2019 2:44 | 0.6    | -1.2    | 2.9987 | -0.6    | 0.5913 | 6.28   | 0.1814 | -0.7418 |
| 4/24/2019 2:45 | 0.5917 | -0.6667 | 2.7955 | -0.55   | 0.5913 | 6.3    | 0.1809 | -0.7418 |
| 4/24/2019 2:46 | 0.5417 | 0.2167  | 2.8323 | -0.1667 | 0.5913 | 6.2636 | 0.1767 | -0.7418 |
| 4/24/2019 2:47 | 0.6    | -0.0833 | 2.9508 | -0.0333 | 0.5913 | 6.2    | 0.182  | -0.7418 |
| 4/24/2019 2:48 | 0.6    | -1.4167 | 2.9252 | -0.6333 | 0.5913 | 6.2545 | 0.166  | -0.7418 |
| 4/24/2019 2:49 | 0.6167 | -0.65   | 3.1412 | -0.1    | 0.5913 | 6.2417 | 0.1853 | -0.7418 |
| 4/24/2019 2:50 | 0.6667 | -0.8167 | 2.8548 | -0.4833 | 0.5913 | 6.3    | 0.177  | -0.7418 |
| 4/24/2019 2:51 | 0.625  | 0       | 3.0522 | -0.3167 | 0.5913 | 6.3    | 0.1804 | -0.7418 |
| 4/24/2019 2:52 | 0.6083 | 0.3333  | 2.9292 | -0.1    | 0.5913 | 6.3    | 0.1836 | -0.7418 |
| 4/24/2019 2:53 | 0.6    | -0.1167 | 3.107  | -0.6667 | 0.5913 | 6.3    | 0.174  | -0.7418 |
| 4/24/2019 2:54 | 0.5833 | -0.3833 | 2.9792 | -0.5    | 0.5913 | 6.3    | 0.1858 | -0.7418 |
| 4/24/2019 2:55 | 0.5    | -0.9667 | 3.0492 | -0.25   | 0.5913 | 6.3    | 0.1742 | -0.7418 |
| 4/24/2019 2:56 | 0.6    | 0.3     | 3.1025 | -0.4833 | 0.5913 | 6.3    | 0.182  | -0.7418 |
| 4/24/2019 2:57 | 0.6    | -0.8833 | 3.1818 | -0.4333 | 0.5913 | 6.3    | 0.1793 | -0.7418 |
| 4/24/2019 2:58 | 0.6    | -0.6167 | 3.0002 | 0.05    | 0.5913 | 6.3    | 0.1783 | -0.7418 |
| 4/24/2019 2:59 | 0.6    | -0.2833 | 3.1037 | -0.2833 | 0.5913 | 6.3    | 0.1853 | -0.7418 |
| 4/24/2019 3:00 | 0.6    | -0.2667 | 3.0383 | -0.3    | 0.5913 | 6.2091 | 0.1698 | -0.7418 |
| 4/24/2019 3:01 | 0.6    | -0.8667 | 2.8802 | -0.1667 | 0.5913 | 6.2    | 0.1833 | -0.7418 |
| 4/24/2019 3:02 | 0.6    | -0.3667 | 2.8407 | 0.1     | 0.5913 | 6.2    | 0.1764 | -0.7418 |
| 4/24/2019 3:03 | 0.6    | 0.25    | 3.2217 | -0.55   | 0.5913 | 6.2    | 0.1762 | -0.7418 |
| 4/24/2019 3:04 | 0.6667 | -0.4667 | 3.0315 | -0.15   | 0.5913 | 6.2    | 0.1862 | -0.7418 |
| 4/24/2019 3:05 | 0.675  | -0.1167 | 2.8328 | -0.4167 | 0.5913 | 6.2    | 0.1744 | -0.7418 |
| 4/24/2019 3:06 | 0.7    | 0.1833  | 3.2827 | -0.4333 | 0.5913 | 6.2    | 0.184  | -0.7418 |
| 4/24/2019 3:07 | 0.7    | 0.0167  | 2.9873 |         | 0.5913 | 6.2    | 0.1771 | -0.7418 |
| 4/24/2019 3:08 | 0.7    | -0.9167 | 3.0292 |         | 0.5913 | 6.2    | 0.1755 | -0.7418 |
| 4/24/2019 3:09 | 0.7    | -0.8833 | 3.1718 |         | 0.5913 | 6.1545 | 0.1809 | -0.7418 |
| 4/24/2019 3:10 | 0.7    | -0.6167 | 3.2788 |         | 0.5913 | 6.2    | 0.17   | -0.7418 |
| 4/24/2019 3:11 | 0.7    | -0.6667 | 3.0955 |         | 0.5913 | 6.2    | 0.1826 | -0.7418 |
| 4/24/2019 3:12 | 0.7    | 0.0333  | 3.0602 |         | 0.5913 | 6.2    | 0.1733 | -0.7418 |
| 4/24/2019 3:13 | 0.7083 | -0.4    | 2.7428 |         | 0.5913 | 6.2364 | 0.1852 | -0.7418 |
| 4/24/2019 3:14 | 0.8    | -1.05   | 2.7873 |         | 0.5913 | 6.2182 | 0.179  | -0.7418 |
| 4/24/2019 3:15 | 0.8417 | -0.2667 | 3.0533 |         | 0.5913 | 6.2    | 0.1793 | -0.7418 |
| 4/24/2019 3:16 | 0.9    | -0.4167 | 2.9135 |         | 0.5913 | 6.2    | 0.1826 | -0.7418 |

|                |        |         |        |         |        |        |        |         |
|----------------|--------|---------|--------|---------|--------|--------|--------|---------|
| 4/24/2019 3:17 | 0.9    | -0.8333 | 2.8285 | -0.0429 | 0.5913 | 6.2    | 0.1671 | -0.7418 |
| 4/24/2019 3:18 | 0.8417 | -0.6667 | 3.1777 | -0.4571 | 0.5913 | 6.2    | 0.1823 | -0.7418 |
| 4/24/2019 3:19 | 0.8    | -0.65   | 2.9883 | -1.275  | 0.5913 | 6.14   | 0.1761 | -0.7418 |
| 4/24/2019 3:20 | 0.8    | 0.1167  | 2.8278 | -0.1    | 0.5913 | 6.1    | 0.1772 | -0.7418 |
| 4/24/2019 3:21 | 0.8    | -0.2167 | 2.716  | -0.01   | 0.5913 | 6.1    | 0.1832 | -0.7418 |
| 4/24/2019 3:22 | 0.75   | -0.5167 | 2.962  | -0.525  | 0.5913 | 6.1    | 0.1718 | -0.7418 |
| 4/24/2019 3:23 | 0.7417 | 0.0667  | 2.8285 | -0.5818 | 0.5913 | 6.1    | 0.1876 | -0.7418 |
| 4/24/2019 3:24 | 0.7    | -0.8333 | 3.0482 | -0.725  | 0.5913 | 6.1    | 0.1738 | -0.7418 |
| 4/24/2019 3:25 | 0.7    | -0.6    | 2.8788 | -0.0417 | 0.5913 | 6.1    | 0.1832 | -0.7418 |
| 4/24/2019 3:26 | 0.7    | -0.5833 | 3.072  | 0.1167  | 0.5913 | 6.1    | 0.1819 | -0.7418 |
| 4/24/2019 3:27 | 0.7    | -0.9    | 2.9838 | -0.4917 | 0.5913 | 6.1    | 0.1763 | -0.7418 |
| 4/24/2019 3:28 | 0.7    | -0.6833 | 3.0733 | -0.3667 | 0.5913 | 6.1    | 0.1842 | -0.7418 |
| 4/24/2019 3:29 | 0.6917 | -0.55   | 2.9352 | -0.6417 | 0.5913 | 6.1    | 0.1702 | -0.7418 |
| 4/24/2019 3:30 | 0.6667 | -0.0667 | 2.932  | -0.1083 | 0.5913 | 6.1    | 0.176  | -0.7418 |
| 4/24/2019 3:31 | 0.6083 | -0.3333 | 2.9337 | -0.725  | 0.5913 | 6.1917 | 0.1747 | -0.7418 |
| 4/24/2019 3:32 | 0.6    | -0.4833 | 2.8773 | -0.2083 | 0.5913 | 6.2    | 0.1771 | -0.7418 |
| 4/24/2019 3:33 | 0.6    | -0.4833 | 3.0338 | 0.1583  | 0.5913 | 6.2    | 0.1904 | -0.7418 |
| 4/24/2019 3:34 | 0.5167 | -0.6333 | 2.9171 | 0.05    | 0.5913 | 6.2    | 0.1674 | -0.7418 |
| 4/24/2019 3:35 | 0.5583 | -0.55   | 2.9863 | 0.0583  | 0.5913 | 6.2    | 0.185  | -0.7418 |
| 4/24/2019 3:36 | 0.5417 | -0.3667 | 2.7793 | -0.4083 | 0.5913 | 6.1417 | 0.1703 | -0.7418 |
| 4/24/2019 3:37 | 0.6    | -0.7833 | 2.882  | -0.2833 | 0.5913 | 6.1    | 0.1846 | -0.7418 |
| 4/24/2019 3:38 | 0.6    | -0.8333 | 2.9556 | -0.0417 | 0.5913 | 6.1    | 0.1749 | -0.7418 |
| 4/24/2019 3:39 | 0.6    | -0.6667 | 3.1347 | 0.0833  | 0.5913 | 6.1    | 0.1777 | -0.7418 |
| 4/24/2019 3:40 | 0.625  | -0.35   | 2.8556 | -0.4667 | 0.5913 | 6.1    | 0.1817 | -0.7418 |
| 4/24/2019 3:41 | 0.7    | -0.6333 | 2.9953 | -0.5417 | 0.5913 | 6.1    | 0.169  | -0.7418 |
| 4/24/2019 3:42 | 0.6917 | -0.4167 | 3.1859 | -0.4167 | 0.5913 | 6.05   | 0.1811 | -0.7418 |
| 4/24/2019 3:43 | 0.6083 | -0.5667 | 2.7271 | -0.4083 | 0.5913 | 6.02   | 0.1775 | -0.7418 |
| 4/24/2019 3:44 | 0.6    | -0.25   | 2.7942 | -0.75   | 0.5913 | 6      | 0.1765 | -0.7418 |
| 4/24/2019 3:45 | 0.625  | 0.4167  | 2.6528 | 0       | 0.5913 | 6      | 0.1856 | -0.7418 |
| 4/24/2019 3:46 | 0.7    | -0.1    | 2.8507 | -0.3417 | 0.5913 | 6      | 0.1672 | -0.7418 |
| 4/24/2019 3:47 | 0.7    | -0.2167 | 3.0999 | -0.7833 | 0.5913 | 6.01   | 0.1843 | -0.7418 |
| 4/24/2019 3:48 | 0.7    | -0.7667 | 2.766  | -0.525  | 0.5913 | 6.0083 | 0.169  | -0.7418 |
| 4/24/2019 3:49 | 0.7    | -0.6167 | 2.8553 | -0.575  | 0.5913 | 6.03   | 0.1798 | -0.7418 |
| 4/24/2019 3:50 | 0.7083 | -0.4333 | 2.9094 | -0.5083 | 0.5913 | 6      | 0.1858 | -0.7418 |
| 4/24/2019 3:51 | 0.8    | 0.1     | 3.1618 | -0.6167 | 0.5913 | 6      | 0.168  | -0.7418 |
| 4/24/2019 3:52 | 0.8    | -0.1667 | 3.2053 | -0.325  | 0.5913 | 6      | 0.1812 | -0.7418 |
| 4/24/2019 3:53 | 0.8    | -0.5    | 2.8378 | -0.4333 | 0.5913 | 6      | 0.1715 | -0.7418 |
| 4/24/2019 3:54 | 0.8    | -0.6167 | 3.0282 | -0.4667 | 0.5913 | 6      | 0.1783 | -0.7418 |
| 4/24/2019 3:55 | 0.8    | -0.3167 | 3.0542 | -0.4333 | 0.5913 | 6      | 0.173  | -0.7418 |
| 4/24/2019 3:56 | 0.8417 | -0.3    | 2.6993 | 0.4167  | 0.5913 | 6      | 0.1705 | -0.7418 |
| 4/24/2019 3:57 | 0.8417 | -0.5667 | 2.9402 | 0.2833  | 0.5913 | 6      | 0.1808 | -0.7418 |
| 4/24/2019 3:58 | 0.825  | 0.3833  | 2.8363 | -0.3167 | 0.5913 | 5.9    | 0.1631 | -0.7418 |
| 4/24/2019 3:59 | 0.8    | -0.1333 | 3.1514 | -0.1833 | 0.5913 | 5.9    | 0.1844 | -0.7418 |
| 4/24/2019 4:00 | 0.8    | -0.05   | 3.0147 | -0.075  | 0.5913 | 5.9    | 0.17   | -0.7418 |
| 4/24/2019 4:01 | 0.8    | -0.1333 | 3.044  | -0.2667 | 0.5913 | 5.9    | 0.18   | -0.7418 |
| 4/24/2019 4:02 | 0.8    | -0.1833 | 2.9062 | 0.0667  | 0.5913 | 5.9    | 0.1823 | -0.7418 |
| 4/24/2019 4:03 | 0.8    | -0.2    | 3.1099 | -0.6833 | 0.5913 | 5.9    | 0.1758 | -0.7418 |

|                |        |         |        |         |        |        |        |         |
|----------------|--------|---------|--------|---------|--------|--------|--------|---------|
| 4/24/2019 4:04 | 0.7333 | -0.6333 | 2.9775 | 0.1417  | 0.5913 | 5.9    | 0.1842 | -0.7418 |
| 4/24/2019 4:05 | 0.7    | 0.1167  | 2.937  | -0.8667 | 0.5913 | 5.9    | 0.1665 | -0.7418 |
| 4/24/2019 4:06 | 0.6667 | -0.6833 | 2.7633 | -0.55   | 0.5913 | 5.8545 | 0.1788 | -0.7418 |
| 4/24/2019 4:07 | 0.6    | -0.4667 | 2.7551 | -0.35   | 0.5913 | 5.8    | 0.1794 | -0.7418 |
| 4/24/2019 4:08 | 0.6    | -0.0833 | 3.1348 | 0.125   | 0.5913 | 5.8    | 0.1685 | -0.7418 |
| 4/24/2019 4:09 | 0.6    | 0.0167  | 2.8479 | 0.125   | 0.5913 | 5.8    | 0.184  | -0.7418 |
| 4/24/2019 4:10 | 0.6    | -0.0667 | 3.1917 | 0.0583  | 0.5913 | 5.7583 | 0.1666 | -0.7418 |
| 4/24/2019 4:11 | 0.6    | 0.15    | 3.0441 | -0.3667 | 0.5913 | 5.7182 | 0.1765 | -0.7418 |
| 4/24/2019 4:12 | 0.6    | -0.15   | 2.9762 | -0.15   | 0.5913 | 5.7    | 0.1746 | -0.7418 |
| 4/24/2019 4:13 | 0.6    | -0.0833 | 3.0461 | -0.6333 | 0.5913 | 5.7    | 0.1772 | -0.7418 |
| 4/24/2019 4:14 | 0.6    | 0.3333  | 3.0138 | -0.9583 | 0.5913 | 5.7    | 0.1845 | -0.7418 |
| 4/24/2019 4:15 | 0.6    | -0.4667 | 2.6184 | 0.0333  | 0.5913 | 5.625  | 0.1697 | -0.7418 |
| 4/24/2019 4:16 | 0.6    | 0.1     | 2.8731 | -0.4417 | 0.5913 | 5.6    | 0.1815 | -0.7418 |
| 4/24/2019 4:17 | 0.6    | -0.1667 | 3.0259 | -0.6167 | 0.5913 | 5.6    | 0.1681 | -0.7418 |
| 4/24/2019 4:18 | 0.6083 | -0.2167 | 3.0653 | -0.4417 | 0.5913 | 5.6    | 0.1756 | -0.7418 |
| 4/24/2019 4:19 | 0.6    | 0.2167  | 2.8732 | 0.2583  | 0.5913 | 5.6091 | 0.1747 | -0.7418 |
| 4/24/2019 4:20 | 0.6    | -0.7    | 2.7507 | -0.075  | 0.5913 | 5.7    | 0.165  | -0.7418 |
| 4/24/2019 4:21 | 0.6    | -0.3167 | 3.1168 | -0.5583 | 0.5913 | 5.7    | 0.1799 | -0.7418 |
| 4/24/2019 4:22 | 0.6    | -0.1333 | 2.9392 | 0.0167  | 0.5913 | 5.7    | 0.1633 | -0.7418 |
| 4/24/2019 4:23 | 0.6    | -0.55   | 3.1515 | -0.025  | 0.5913 | 5.7    | 0.1658 | -0.7418 |
| 4/24/2019 4:24 | 0.6    | 0.15    | 3.0427 | -0.45   | 0.5913 | 5.7    | 0.1811 | -0.7418 |
| 4/24/2019 4:25 | 0.6083 | 0.3833  | 3.0715 | 0.3333  | 0.5913 | 5.7    | 0.1692 | -0.7418 |
| 4/24/2019 4:26 | 0.625  | -0.1333 | 3.0228 | 0.2917  | 0.5913 | 5.7    | 0.1849 | -0.7418 |
| 4/24/2019 4:27 | 0.7    | -0.3167 | 2.7749 | -0.5    | 0.5913 | 5.7    | 0.1635 | -0.7418 |
| 4/24/2019 4:28 | 0.7    | -0.0667 | 2.9017 | 0.175   | 0.5913 | 5.7    | 0.1739 | -0.7418 |
| 4/24/2019 4:29 | 0.7    | -0.1833 | 3.0183 | -0.1833 | 0.5913 | 5.7455 | 0.1745 | -0.7418 |
| 4/24/2019 4:30 | 0.7    | 0.7167  | 2.9244 | 0.1667  | 0.5913 | 5.8    | 0.1732 | -0.7418 |
| 4/24/2019 4:31 | 0.7    | -0.2833 | 2.9103 | -0.475  | 0.5913 | 5.8    | 0.1854 | -0.7418 |
| 4/24/2019 4:32 | 0.7    | 0.05    | 2.894  | -0.175  | 0.5913 | 5.725  | 0.1663 | -0.7418 |
| 4/24/2019 4:33 | 0.7417 | -0.55   | 2.9817 | -0.4417 | 0.5913 | 5.7    | 0.1801 | -0.7418 |
| 4/24/2019 4:34 | 0.7083 | 0.3     | 3.0111 | -0.2083 | 0.5913 | 5.7    | 0.178  | -0.7418 |
| 4/24/2019 4:35 | 0.7    | -0.2167 | 2.9218 | -0.2333 | 0.5913 | 5.7    | 0.1691 | -0.7418 |
| 4/24/2019 4:36 | 0.7    | -0.6333 | 2.7801 | -0.6167 | 0.5913 | 5.7    | 0.1761 | -0.7418 |
| 4/24/2019 4:37 | 0.7    | -0.9167 | 3.2258 | -0.0583 | 0.5913 | 5.7    | 0.1595 | -0.7418 |
| 4/24/2019 4:38 | 0.7    | -0.9333 | 3.0059 | -0.4667 | 0.5913 | 5.7    | 0.1808 | -0.7418 |
| 4/24/2019 4:39 | 0.725  | -0.2333 | 2.8073 | 0.025   | 0.5913 | 5.7    | 0.1754 | -0.7418 |
| 4/24/2019 4:40 | 0.7833 | -0.4833 | 2.5672 | -0.2833 | 0.5913 | 5.7    | 0.1695 | -0.7418 |
| 4/24/2019 4:41 | 0.8    | -0.2833 | 2.9816 | -0.4    | 0.5913 | 5.7    | 0.1873 | -0.7418 |
| 4/24/2019 4:42 | 0.8    | -0.6167 | 2.9795 | -0.5667 | 0.5913 | 5.7    | 0.1674 | -0.7418 |
| 4/24/2019 4:43 | 0.8    | 0.1     | 2.6189 | -0.4667 | 0.5913 | 5.7    | 0.1756 | -0.7418 |
| 4/24/2019 4:44 | 0.7167 | -0.1167 | 2.77   | -0.2333 | 0.5913 | 5.7    | 0.1725 | -0.7418 |
| 4/24/2019 4:45 | 0.7417 | 0.0333  | 2.7698 | 0.125   | 0.5913 | 5.7    | 0.1703 | -0.7418 |
| 4/24/2019 4:46 | 0.7    | -0.0667 | 3.0101 | -0.1583 | 0.5913 | 5.7    | 0.1767 | -0.7418 |
| 4/24/2019 4:47 | 0.7    | -0.35   | 2.9426 | 0.1083  | 0.5913 | 5.7    | 0.1662 | -0.7418 |
| 4/24/2019 4:48 | 0.7    | 0.1     | 2.9588 | -0.15   | 0.5913 | 5.7    | 0.1842 | -0.7418 |
| 4/24/2019 4:49 | 0.7    | -0.2667 | 2.8142 | -0.15   | 0.5913 | 5.6167 | 0.1631 | -0.7418 |
| 4/24/2019 4:50 | 0.7333 | 0.1833  | 2.7949 | 0.3667  | 0.5913 | 5.6    | 0.177  | -0.7418 |

|                |        |         |        |         |        |        |        |         |
|----------------|--------|---------|--------|---------|--------|--------|--------|---------|
| 4/24/2019 4:51 | 0.7083 | -0.4333 | 2.8943 | 0.1583  | 0.5913 | 5.6    | 0.1756 | -0.7418 |
| 4/24/2019 4:52 | 0.7    | -0.3833 | 3.0612 | -0.2583 | 0.5913 | 5.6    | 0.1699 | -0.7418 |
| 4/24/2019 4:53 | 0.7    | -0.25   | 3.047  | -0.15   | 0.5913 | 5.6    | 0.1802 | -0.7418 |
| 4/24/2019 4:54 | 0.7    | 0.1333  | 2.8969 | -0.1167 | 0.5913 | 5.6    | 0.1695 | -0.7418 |
| 4/24/2019 4:55 | 0.6833 | -0.65   | 2.9815 | -1.0167 | 0.5913 | 5.6    | 0.1731 | -0.7418 |
| 4/24/2019 4:56 | 0.6167 | 0.1667  | 2.8706 | -0.4833 | 0.5913 | 5.6    | 0.1727 | -0.7418 |
| 4/24/2019 4:57 | 0.6583 | 0.0333  | 2.9411 | -0.3417 | 0.5913 | 5.6    | 0.1656 | -0.7418 |
| 4/24/2019 4:58 | 0.6417 | -0.6167 | 3.2166 | -0.7167 | 0.5913 | 5.6    | 0.1828 | -0.7418 |
| 4/24/2019 4:59 | 0.6833 | -0.8667 | 3.0998 | -0.3583 | 0.5913 | 5.6    | 0.1671 | -0.7418 |
| 4/24/2019 5:00 | 0.7    | 0.2667  | 3.155  | -0.0667 | 0.5913 | 5.6455 | 0.1757 | -0.7418 |
| 4/24/2019 5:01 | 0.7    | 0.2333  | 3.0677 | -0.2333 | 0.5913 | 5.7    | 0.171  | -0.7418 |
| 4/24/2019 5:02 | 0.7    | 0.1333  | 2.8465 | -0.575  | 0.5913 | 5.7    | 0.1664 | -0.7418 |
| 4/24/2019 5:03 | 0.7    | -0.4667 | 2.864  | -0.5667 | 0.5913 | 5.7    | 0.1764 | -0.7418 |
| 4/24/2019 5:04 | 0.7    | -0.25   | 2.8953 | -0.5333 | 0.5913 | 5.7    | 0.1622 | -0.7418 |
| 4/24/2019 5:05 | 0.7    | -0.0333 | 2.687  | -0.5167 | 0.5913 | 5.7    | 0.1699 | -0.7418 |
| 4/24/2019 5:06 | 0.775  | -0.2667 | 2.9635 | -0.325  | 0.5913 | 5.7    | 0.1638 | -0.7418 |
| 4/24/2019 5:07 | 0.8    | -0.35   | 2.9675 | -0.375  | 0.5913 | 5.69   | 0.1593 | -0.7418 |
| 4/24/2019 5:08 | 0.8    | -0.2333 | 2.9318 | -0.3667 | 0.5913 | 5.6818 | 0.1725 | -0.7418 |
| 4/24/2019 5:09 | 0.8    | -0.35   | 3.2062 | -0.1917 | 0.5913 | 5.7    | 0.1577 | -0.7418 |
| 4/24/2019 5:10 | 0.7917 | -0.2    | 2.9028 | -0.3583 | 0.5913 | 5.7    | 0.173  | -0.7418 |
| 4/24/2019 5:11 | 0.8    | 0.2333  | 3.189  | -0.3417 | 0.5913 | 5.7    | 0.163  | -0.7418 |
| 4/24/2019 5:12 | 0.8    | 0.2167  | 2.6927 | 0.1     | 0.5913 | 5.7    | 0.1565 | -0.7418 |
| 4/24/2019 5:13 | 0.8    | -0.5167 | 2.9258 | -0.5083 | 0.5913 | 5.7    | 0.1664 | -0.7418 |
| 4/24/2019 5:14 | 0.8083 | -0.25   | 3.314  | -0.0333 | 0.5913 | 5.7    | 0.1494 | -0.7418 |
| 4/24/2019 5:15 | 0.8083 | -0.1833 | 2.8118 | 0.1333  | 0.5913 | 5.7    | 0.1623 | -0.7418 |
| 4/24/2019 5:16 | 0.8083 | -0.0833 | 2.9785 | -0.4167 | 0.5913 | 5.7    | 0.1596 | -0.7418 |
| 4/24/2019 5:17 | 0.8083 | -0.8667 | 3.107  | -0.5667 | 0.5913 | 5.7    | 0.1589 | -0.7418 |
| 4/24/2019 5:18 | 0.825  | -0.0833 | 2.6873 | -0.2    | 0.5913 | 5.7    | 0.1616 | -0.7418 |
| 4/24/2019 5:19 | 0.825  | 0.4     | 3.0273 | 0.0167  | 0.5913 | 5.7917 | 0.1451 | -0.7418 |
| 4/24/2019 5:20 | 0.8667 | -0.45   | 2.9537 | -0.0667 | 0.5913 | 5.8    | 0.1575 | -0.7418 |
| 4/24/2019 5:21 | 0.8417 | -0.2667 | 3.1973 | -0.275  | 0.5913 | 5.8    | 0.1606 | -0.7418 |
| 4/24/2019 5:22 | 0.8    | -0.65   | 2.9393 | -0.2333 | 0.5913 | 5.7583 | 0.1469 | -0.7418 |
| 4/24/2019 5:23 | 0.8    | -0.4    | 2.8455 | 0.175   | 0.5913 | 5.7    | 0.1646 | -0.7418 |
| 4/24/2019 5:24 | 0.8167 | -0.2833 | 2.7067 | -0.1583 | 0.5913 | 5.7    | 0.154  | -0.7418 |
| 4/24/2019 5:25 | 0.8333 | -0.1    | 2.8123 | 0.2333  | 0.5913 | 5.7    | 0.1583 | -0.7418 |
| 4/24/2019 5:26 | 0.8167 | -0.45   | 3.2693 | -0.0333 | 0.5913 | 5.6545 | 0.1637 | -0.7418 |
| 4/24/2019 5:27 | 0.8167 | 0.05    | 2.9492 | -0.5167 | 0.5913 | 5.6    | 0.1498 | -0.7418 |
| 4/24/2019 5:28 | 0.8    | -0.1167 | 2.7232 | -0.9417 | 0.5913 | 5.6    | 0.1643 | -0.7418 |
| 4/24/2019 5:29 | 0.8    | -0.2667 | 2.8752 | -0.4667 | 0.5913 | 5.6    | 0.1562 | -0.7418 |
| 4/24/2019 5:30 | 0.8    | -0.7667 | 3.0313 | 0.0417  | 0.5913 | 5.6    | 0.1524 | -0.7418 |
| 4/24/2019 5:31 | 0.8    | -0.4667 | 2.7673 | -0.1333 | 0.5913 | 5.6    | 0.1656 | -0.7418 |
| 4/24/2019 5:32 | 0.8    | -0.7167 | 3.0675 | -0.0417 | 0.5913 | 5.6    | 0.1503 | -0.7418 |
| 4/24/2019 5:33 | 0.8    | 0.1667  | 2.972  | -0.125  | 0.5913 | 5.5083 | 0.1548 | -0.7418 |
| 4/24/2019 5:34 | 0.8    | 0.0167  | 2.9017 | 0.0333  | 0.5913 | 5.5    | 0.1622 | -0.7418 |
| 4/24/2019 5:35 | 0.7    | -0.0333 | 3.152  | -0.4    | 0.5913 | 5.5    | 0.1527 | -0.7418 |
| 4/24/2019 5:36 | 0.7    | -0.85   | 3.1308 | -0.1917 | 0.5913 | 5.5    | 0.1581 | -0.7418 |
| 4/24/2019 5:37 | 0.7    | -0.3333 | 3.0032 | -0.425  | 0.5913 | 5.5    | 0.1519 | -0.7418 |

|                |        |         |        |         |        |        |        |         |
|----------------|--------|---------|--------|---------|--------|--------|--------|---------|
| 4/24/2019 5:38 | 0.7167 | 0.0333  | 2.188  | 0.1667  | 0.5913 | 5.5    | 0.1615 | -0.7418 |
| 4/24/2019 5:39 | 0.7    | -0.2667 | 2.9312 | 0.1833  | 0.5913 | 5.5    | 0.1609 | -0.7418 |
| 4/24/2019 5:40 | 0.7    | 0.0667  | 3.2218 | 0.3583  | 0.5913 | 5.5    | 0.1523 | -0.7418 |
| 4/24/2019 5:41 | 0.725  | 0.25    | 2.9517 | 0.3167  | 0.5913 | 5.5    | 0.1583 | -0.7418 |
| 4/24/2019 5:42 | 0.8    | -0.4167 | 2.9283 | -0.175  | 0.5913 | 5.5    | 0.1592 | -0.7418 |
| 4/24/2019 5:43 | 0.8    | -0.2667 | 3.1845 | -0.2167 | 0.5913 | 5.5    | 0.1555 | -0.7418 |
| 4/24/2019 5:44 | 0.8    | -0.2    | 2.5363 | -0.0167 | 0.5913 | 5.5    | 0.1654 | -0.7418 |
| 4/24/2019 5:45 | 0.8    | -0.8333 | 3.0225 | -0.2833 | 0.5913 | 5.5    | 0.1578 | -0.7418 |
| 4/24/2019 5:46 | 0.8    | -1.1    | 2.914  | -0.2833 | 0.5913 | 5.5    | 0.1706 | -0.7418 |
| 4/24/2019 5:47 | 0.8    | -0.3833 | 3.3283 | -0.1083 | 0.5913 | 5.5    | 0.1619 | -0.7418 |
| 4/24/2019 5:48 | 0.8    | -0.3833 | 3.4453 | -0.6333 | 0.5913 | 5.5    | 0.1563 | -0.7418 |
| 4/24/2019 5:49 | 0.8    | -0.8667 | 3.0793 | 0.35    | 0.5913 | 5.5    | 0.1644 | -0.7418 |
| 4/24/2019 5:50 | 0.8    | -0.2167 | 3.155  | -0.4917 | 0.5913 | 5.5    | 0.1534 | -0.7418 |
| 4/24/2019 5:51 | 0.8    | -0.1167 | 3.018  | -0.1333 | 0.5913 | 5.5    | 0.154  | -0.7418 |
| 4/24/2019 5:52 | 0.8    | -0.6    | 3.1795 | -0.1417 | 0.5913 | 5.5    | 0.1655 | -0.7418 |
| 4/24/2019 5:53 | 0.8167 | -0.05   | 2.8965 | -0.1917 | 0.5913 | 5.4727 | 0.1548 | -0.7418 |
| 4/24/2019 5:54 | 0.9    | 0.2     | 2.9595 | 0.5417  | 0.5913 | 5.4    | 0.1613 | -0.7418 |
| 4/24/2019 5:55 | 0.9    | 0.5667  | 3.3397 | 0.0417  | 0.5913 | 5.4    | 0.1629 | -0.7418 |
| 4/24/2019 5:56 | 0.9417 | -0.05   | 3.3725 | -0.2083 | 0.5913 | 5.31   | 0.1517 | -0.7418 |
| 4/24/2019 5:57 | 0.9583 | 0.2667  | 2.9988 | -0.0833 | 0.5913 | 5.3    | 0.17   | -0.7418 |
| 4/24/2019 5:58 | 0.9667 | 0.1833  | 3.3247 | -0.2667 | 0.5913 | 5.3    | 0.1521 | -0.7418 |
| 4/24/2019 5:59 | 0.8917 | -0.4833 | 3.0563 | 0.2583  | 0.5913 | 5.3    | 0.1712 | -0.7418 |
| 4/24/2019 6:00 | 0.8417 | -0.45   | 3.202  | -0.0083 | 0.5913 | 5.2    | 0.1598 | -0.7418 |
| 4/24/2019 6:01 | 0.8    | -0.0333 | 3.0843 | 0.075   | 0.5913 | 5.2    | 0.1558 | -0.7418 |
| 4/24/2019 6:02 | 0.7833 | -0.1833 | 3.1248 | 0.0917  | 0.5913 | 5.2    | 0.1708 | -0.7418 |
| 4/24/2019 6:03 | 0.8    | -0.4    | 3.2112 | 0.1833  | 0.5913 | 5.2    | 0.1615 | -0.7418 |
| 4/24/2019 6:04 | 0.8417 | -0.2167 | 3.1365 | 0.275   | 0.5913 | 5.2    | 0.1715 | -0.7418 |
| 4/24/2019 6:05 | 0.9    | 0.4     | 3.2308 | -0.3667 | 0.5913 | 5.2    | 0.1693 | -0.7418 |
| 4/24/2019 6:06 | 0.8333 | -0.3833 | 3.3792 | -0.1833 | 0.5913 | 5.2    | 0.1616 | -0.7418 |
| 4/24/2019 6:07 | 0.825  | -0.0667 | 2.8832 | 0.025   | 0.5913 | 5.2727 | 0.1749 | -0.7418 |
| 4/24/2019 6:08 | 0.8    | -0.2    | 3.156  | -0.1417 | 0.5913 | 5.3    | 0.1658 | -0.7418 |
| 4/24/2019 6:09 | 0.8    | -0.2    | 3.2247 | -0.1417 | 0.5913 | 5.3    | 0.163  | -0.7418 |
| 4/24/2019 6:10 | 0.8    | 0.15    | 3.3595 | -0.2    | 0.5913 | 5.3    | 0.1786 | -0.7418 |
| 4/24/2019 6:11 | 0.875  | 0.0833  | 3.142  | 0.075   | 0.5913 | 5.3    | 0.1667 | -0.7418 |
| 4/24/2019 6:12 | 0.9    | -0.7333 | 2.1862 | -0.1    | 0.5913 | 5.3    | 0.1686 | -0.7418 |
| 4/24/2019 6:13 | 0.8917 | 0       | 2.9652 | -0.0917 | 0.5913 | 5.2091 | 0.1729 | -0.7418 |
| 4/24/2019 6:14 | 0.8167 | 0.4667  | 3.0893 | 0.2417  | 0.5913 | 5.2    | 0.1637 | -0.7418 |
| 4/24/2019 6:15 | 0.8    | 0.0667  | 3.2832 | -0.0833 | 0.5913 | 5.2    | 0.1781 | -0.7418 |
| 4/24/2019 6:16 | 0.8667 | -0.1667 | 3.1905 | -0.1    | 0.5913 | 5.2364 | 0.167  | -0.7418 |
| 4/24/2019 6:17 | 0.9    | 0.1833  | 3.2393 | -0.4333 | 0.5913 | 5.2    | 0.1566 | -0.7418 |
| 4/24/2019 6:18 | 0.9    | 0.0333  | 2.9642 | -0.0667 | 0.5913 | 5.1667 | 0.1734 | -0.7418 |
| 4/24/2019 6:19 | 0.8333 | -0.05   | 3.0213 | -0.55   | 0.5913 | 5.1    | 0.1552 | -0.7418 |
| 4/24/2019 6:20 | 0.8    | -0.2    | 3.1458 | -0.3917 | 0.5913 | 5.1    | 0.1773 | -0.7418 |
| 4/24/2019 6:21 | 0.7833 | -0.7333 | 3.3205 | -0.325  | 0.5913 | 5.0818 | 0.1813 | -0.7418 |
| 4/24/2019 6:22 | 0.7667 | -0.3833 | 3.0562 | -0.8083 | 0.5913 | 5.05   | 0.1659 | -0.7418 |
| 4/24/2019 6:23 | 0.7333 | 0.1167  | 3.2995 | -0.075  | 0.5913 | 5.1    | 0.1737 | -0.7418 |
| 4/24/2019 6:24 | 0.8    | -0.1333 | 3.0498 | 0.4667  | 0.5913 | 5.1    | 0.16   | -0.7418 |

|                |        |         |         |         |        |          |        |         |
|----------------|--------|---------|---------|---------|--------|----------|--------|---------|
| 4/24/2019 6:25 | 0.825  | -0.2167 | 2.9352  | 0.2083  | 0.5913 | 5.1      | 0.1643 | -0.7418 |
| 4/24/2019 6:26 | 0.8917 | -0.1333 | 3.3705  | 0.4583  | 0.5913 | 5.1      | 0.1704 | -0.7418 |
| 4/24/2019 6:27 | 0.8917 | 0.3167  | 2.9507  | 0.5167  | 0.5913 | 5.1      | 0.149  | -0.7418 |
| 4/24/2019 6:28 | 0.875  | 0.4833  | 2.981   | -0.2    | 0.5913 | 5.03     | 0.1646 | -0.7418 |
| 4/24/2019 6:29 | 0.8833 | 0.4833  | 2.9155  | 0.125   | 0.5913 | 5        | 0.1596 | -0.7418 |
| 4/24/2019 6:30 | 0.9    | 0.1833  | 3.301   | 0.1583  | 0.5913 | 5        | 0.1691 | -0.7418 |
| 4/24/2019 6:31 | 0.9    | 0.4667  | 3.2538  | -0.0917 | 0.5913 | 5.0417   | 0.1722 | -0.7418 |
| 4/24/2019 6:32 | 0.9    | 0.1     | 2.9793  | -0.05   | 0.5913 | 5.075    | 0.1625 | -0.7418 |
| 4/24/2019 6:33 | 0.9    | 0.0333  | 3.2148  | 0       | 0.5913 | 5.1      | 0.1671 | -0.7418 |
| 4/24/2019 6:34 | 0.9    | 0.0833  | 3.006   | 0.3833  | 0.5913 | 5.1      | 0.1602 | -0.7418 |
| 4/24/2019 6:35 | 0.9    | -0.5    | 3.1013  | -0.3167 | 0.5913 | 5.1      | 0.1665 | -0.7418 |
| 4/24/2019 6:36 | 0.9    | 0.1667  | 2.9102  | -0.0917 | 0.5913 | 5.1      | 0.1756 | -0.7418 |
| 4/24/2019 6:37 | 0.9    | 0.1167  | 2.9491  | -0.125  | 0.5913 | 5.0917   | 0.163  | -0.7418 |
| 4/24/2019 6:38 | 0.925  | -0.15   | 2.9678  | -0.2167 | 0.5913 | 5        | 0.1667 | -0.7418 |
| 4/24/2019 6:39 | 1      | 0.4167  | 2.9588  | 0.1583  | 0.5913 | 5        | 0.1788 | -0.7418 |
| 4/24/2019 6:40 | 1      | -0.0167 | 3.0782  | -0.5167 | 0.5913 | 5        | 0.1672 | -0.7418 |
| 4/24/2019 6:41 | 1      | 0.35    | 3.0115  | -0.275  | 0.5913 | 4.98     | 0.1809 | -0.7418 |
| 4/24/2019 6:42 | 1.05   | 0.65    | 2.6938  | -0.0583 | 0.5913 | 5        | 0.1795 | -0.7418 |
| 4/24/2019 6:43 | 1.1    | -0.05   | 3.0499  | 0.025   | 0.5913 | 4.975    | 0.1746 | -0.7418 |
| 4/24/2019 6:44 | 1.1    | 0.6667  | 3.3973  | -0.025  | 0.5913 | 4.9      | 0.1837 | -0.7418 |
| 4/24/2019 6:45 | 1.05   | -0.25   | 3.4303  | 0.3     | 0.5913 | 4.9      | 0.1794 | -0.7418 |
| 4/24/2019 6:46 | 1.0083 | -0.2833 | 3.1639  | 0.3417  | 0.5913 | 4.9      | 0.1741 | -0.7418 |
| 4/24/2019 6:47 | 1.0333 | -0.8167 | 3.1028  | -0.0333 | 0.5913 | 4.9      | 0.1812 | -0.7418 |
| 4/24/2019 6:48 | 1      | 0.05    | 3.0717  | -0.2    | 0.5913 | 4.9      | 0.1722 | -0.7418 |
| 4/24/2019 6:49 | 0.9417 | -0.45   | 3.0463  | -0.1333 | 0.5913 | 4.9      | 0.1794 | -0.7418 |
| 4/24/2019 6:50 | 0.8333 | -0.0667 | 3.1146  | -0.0167 | 0.5913 | 4.9      | 0.1689 | -0.7418 |
| 4/24/2019 6:51 | 0.8    | -0.35   | 2.9309  | 0.0833  | 0.5913 | 4.9583   | 0.1768 | -0.7418 |
| 4/24/2019 6:52 | 0.8    | -0.2667 | 3.1048  | -0.3167 | 0.5913 | 5        | 0.1708 | -0.7418 |
| 4/24/2019 6:53 | 0.8    | -0.2    | 2.9122  | -0.2917 | 0.5913 | 5        | 0.1661 | -0.7418 |
| 4/24/2019 6:54 | 0.8    | -0.35   | 2.9635  | -0.0417 | 0.5913 | 5        | 0.1769 | -0.7418 |
| 4/24/2019 6:55 | 0.8    | -0.3667 | 3.055   | 0.0917  | 0.5913 | 5        | 0.172  | -0.7418 |
| 4/24/2019 6:56 | 0.8    | -0.5833 | 2.7578  | 0.225   | 0.5913 | 5        | 0.1719 | -0.7418 |
| 4/24/2019 6:57 | 0.8    | 0.15    | 2.8547  | -0.2167 | 0.5913 | 5.03     | 0.1776 | -0.7418 |
| 4/24/2019 6:58 | 0.7833 | -0.3    | 3.1609  | 0.1917  | 0.5913 | 5        | 0.1678 | -0.7418 |
| 4/24/2019 6:59 | 0.8    | 1.1167  | 2.8934  | -0.0417 | 0.5913 | 5        | 0.176  | -0.7418 |
| 4/24/2019 7:00 | 0.8    | -0.15   | 2.8524  | -0.5667 | 0.5913 | 5.25     | 0.1713 | -0.7418 |
| 4/24/2019 7:01 | 0.7833 | 0.1667  | 4.7413  | 0.35    | 0.5913 | 45.4545  | 0.1677 | -0.7418 |
| 4/24/2019 7:02 | 0.675  | 0.35    | 7.085   | -0.25   | 0.5913 | 48.7     | 0.1819 | -0.7418 |
| 4/24/2019 7:03 | 0.6    | 0.4667  | 29.2542 | 0.6333  | 0.5913 | 92.2182  | 0.1671 | -0.7418 |
| 4/24/2019 7:04 | 0.5833 | -0.1333 | 30.6408 | -0.075  | 0.5913 | 100.82   | 0.1777 | -0.7418 |
| 4/24/2019 7:05 | 0.5    | 0.4667  | 29.52   | 0.5083  | 0.5913 | 102.4    | 0.1835 | -0.7418 |
| 4/24/2019 7:06 | 0.5    | 0.0167  | 29.2675 | -0.2833 | 0.5913 | 102.4167 | 0.1783 | -0.7418 |
| 4/24/2019 7:07 | 0.5    | -0.15   | 28.2142 | -0.35   | 0.5913 | 101.0273 | 0.1979 | -0.7418 |
| 4/24/2019 7:08 | 0.5333 | -0.85   | 28.0808 | 0.0833  | 0.5913 | 101.4083 | 0.1804 | -0.7418 |
| 4/24/2019 7:09 | 0.6    | -0.4    | 26.9775 | 0.075   | 0.5913 | 102.01   | 0.1851 | -0.7418 |
| 4/24/2019 7:10 | 0.5833 | -0.7    | 26.1267 | -0.2583 | 0.5913 | 99.6833  | 0.211  | -0.7418 |
| 4/24/2019 7:11 | 0.55   | -0.6167 | 25.0867 | -0.4917 | 0.5913 | 97.8909  | 0.211  | -0.7418 |

|                |        |         |         |         |        |         |        |         |
|----------------|--------|---------|---------|---------|--------|---------|--------|---------|
| 4/24/2019 7:12 | 0.5    | -0.7167 | 25.1417 | -0.4917 | 0.5913 | 98.5083 | 0.2308 | -0.7418 |
| 4/24/2019 7:13 | 0.5    | -0.45   | 23.975  | -0.1833 | 0.5913 | 97.3    | 0.2575 | -0.7418 |
| 4/24/2019 7:14 | 0.5    | -0.2833 | 23.39   | 0.45    | 0.5913 | 96.8333 | 0.2842 | -0.7418 |
| 4/24/2019 7:15 | 0.5    | -0.2167 | 22.7125 | -0.4167 | 0.5913 | 95.97   | 0.3313 | -0.7418 |
| 4/24/2019 7:16 | 0.5833 | -0.7667 | 21.8717 | 0.1917  | 0.5913 | 95.6636 | 0.3663 | -0.7418 |
| 4/24/2019 7:17 | 0.5    | -0.5833 | 21.5992 | -0.475  | 0.5913 | 95.4222 | 0.3935 | -0.7418 |
| 4/24/2019 7:18 | 0.5    | -0.0167 | 21.4075 | -0.1    | 0.5913 | 95.2833 | 0.4436 | -0.7418 |
| 4/24/2019 7:19 | 0.5    | -0.0333 | 20.7117 | -0.3333 | 0.5913 | 95.0818 | 0.4886 | -0.7418 |
| 4/24/2019 7:20 | 0.5    | -0.4    | 20.1875 | -0.55   | 0.5913 | 94.8583 | 0.5678 | -0.7418 |
| 4/24/2019 7:21 | 0.5    | 0.1333  | 19.7292 | 0.3     | 0.5913 | 94.55   | 0.6121 | -0.7418 |
| 4/24/2019 7:22 | 0.5167 | -0.6167 | 19.2858 | 0.2     | 0.5913 | 94.1417 | 0.6767 | -0.7418 |
| 4/24/2019 7:23 | 0.55   | -0.1667 | 18.8942 | -0.1667 | 0.5913 | 93.7    | 0.6944 | -0.7418 |
| 4/24/2019 7:24 | 0.525  | -0.2833 | 18.73   | -0.55   | 0.5913 | 93.2667 | 0.729  | -0.7418 |
| 4/24/2019 7:25 | 0.5    | -0.2333 | 18.0125 | -0.15   | 0.5913 | 92.67   | 0.8237 | -0.7418 |
| 4/24/2019 7:26 | 0.5    | -0.0667 | 17.9625 | -0.2083 | 0.5913 | 92.1273 | 0.8786 | -0.7418 |
| 4/24/2019 7:27 | 0.4667 | -0.6833 | 17.8217 | -0.0917 | 0.5913 | 91.5182 | 0.9662 | -0.7418 |
| 4/24/2019 7:28 | 0.5    | -0.6667 | 17.34   | -0.125  | 0.5913 | 90.9833 | 0.9832 | -0.7418 |
| 4/24/2019 7:29 | 0.5    | -0.1667 | 16.9025 | -0.025  | 0.5913 | 90.56   | 1.0262 | -0.7418 |
| 4/24/2019 7:30 | 0.5667 | -0.2167 | 16.9158 | -0.3667 | 0.5913 | 89.9091 | 1.0143 | -0.7418 |
| 4/24/2019 7:31 | 0.525  | -0.4167 | 16.3892 | -0.1583 | 0.5913 | 89.14   | 1.0757 | -0.7418 |
| 4/24/2019 7:32 | 0.5    | -0.4167 | 16.2083 | -0.3667 | 0.5913 | 88.4667 | 1.0679 | -0.7418 |
| 4/24/2019 7:33 | 0.5167 | -0.25   | 15.8533 | -0.2167 | 0.5913 | 87.8083 | 1.0864 | -0.7418 |
| 4/24/2019 7:34 | 0.5    | -0.8333 | 15.7108 | -0.35   | 0.5913 | 87.2273 | 1.0971 | -0.7418 |
| 4/24/2019 7:35 | 0.4417 | -0.75   | 15.2142 | -0.7583 | 0.5913 | 86.5833 | 1.1238 | -0.7418 |
| 4/24/2019 7:36 | 0.4    | -0.6167 | 14.8358 | -0.8083 | 0.5913 | 85.8917 | 1.1774 | -0.7418 |
| 4/24/2019 7:37 | 0.4417 | -0.2333 | 14.8683 | -0.8667 | 0.5913 | 85.25   | 1.1714 | -0.7418 |
| 4/24/2019 7:38 | 0.5    | -1.0167 | 14.6817 | -0.4083 | 0.5913 | 84.6667 | 1.1712 | -0.7418 |
| 4/24/2019 7:39 | 0.5    | -0.8167 | 14.2333 | -0.7083 | 0.5913 | 84.0091 | 1.1813 | -0.7418 |
| 4/24/2019 7:40 | 0.5    | -0.8833 | 13.9733 | -0.4583 | 0.5913 | 83.3909 | 1.2005 | -0.7418 |
| 4/24/2019 7:41 | 0.5    | -0.3667 | 13.9708 | -0.1    | 0.5913 | 82.8417 | 1.1957 | -0.7418 |
| 4/24/2019 7:42 | 0.5    | -0.2333 | 13.7417 | -0.4    | 0.5913 | 82.2364 | 1.2033 | -0.7418 |
| 4/24/2019 7:43 | 0.4167 | -0.2333 | 13.5017 | -0.0167 | 0.5913 | 81.7083 | 1.2134 | -0.7418 |
| 4/24/2019 7:44 | 0.4    | -0.5667 | 13      | -0.9833 | 0.5913 | 81.1083 | 1.1638 | -0.7418 |
| 4/24/2019 7:45 | 0.5    | -0.5    | 12.8708 | -0.475  | 0.5913 | 80.5273 | 1.1568 | -0.7418 |
| 4/24/2019 7:46 | 0.5    | -0.0167 | 12.8917 | -0.125  | 0.5913 | 79.9    | 1.1456 | -0.7418 |
| 4/24/2019 7:47 | 0.5    | 0       | 12.6742 | -0.1167 | 0.5913 | 79.3167 | 1.0986 | -0.7418 |
| 4/24/2019 7:48 | 0.5    | -0.1833 | 12.5842 | -0.5083 | 0.5913 | 78.825  | 1.108  | -0.7418 |
| 4/24/2019 7:49 | 0.5    | -0.2    | 12.2183 | -0.2333 | 0.5913 | 78.2083 | 1.0976 | -0.7418 |
| 4/24/2019 7:50 | 0.5    | -0.45   | 11.755  | -0.1583 | 0.5913 | 77.5727 | 1.1637 | -0.7418 |
| 4/24/2019 7:51 | 0.5    | -0.7    | 12.0025 | -0.7167 | 0.5913 | 76.9091 | 1.1493 | -0.7418 |
| 4/24/2019 7:52 | 0.5    | -0.7667 | 11.4983 | -0.7    | 0.5913 | 76.3    | 1.1049 | -0.7418 |
| 4/24/2019 7:53 | 0.575  | -0.65   | 11.3517 | -0.3    | 0.5913 | 75.6455 | 1.1626 | -0.7418 |
| 4/24/2019 7:54 | 0.6    | -0.25   | 11.3842 | -0.3917 | 0.5913 | 75.0167 | 1.1274 | -0.7418 |
| 4/24/2019 7:55 | 0.6    | 0.3167  | 11.1108 | -0.3    | 0.5913 | 74.2818 | 1.0854 | -0.7418 |
| 4/24/2019 7:56 | 0.525  | 0.1833  | 11.1975 | -0.7583 | 0.5913 | 73.6818 | 1.035  | -0.7418 |
| 4/24/2019 7:57 | 0.5    | -1.0667 | 10.9658 | -0.5667 | 0.5913 | 73.0727 | 1.0645 | -0.7418 |
| 4/24/2019 7:58 | 0.5    | -0.3    | 10.5142 | -0.275  | 0.5913 | 72.4364 | 1.1127 | -0.7418 |



|                |         |         |         |         |        |         |        |         |
|----------------|---------|---------|---------|---------|--------|---------|--------|---------|
| 4/24/2019 7:59 | 0.5     | -0.7    | 10.62   | -0.4333 | 0.5913 | 71.725  | 1.0748 | -0.7418 |
| 4/24/2019 8:00 | 0.5     | -0.7    | 10.3108 | -0.325  | 0.5913 | 71.0636 | 1.0114 | -0.7418 |
| 4/24/2019 8:01 | 0.5     | -0.4333 | 10.1833 | -0.875  | 0.5913 | 70.5455 | 1.0582 | -0.7418 |
| 4/24/2019 8:02 | 0.5     | -0.9167 | 10.2077 | -0.9417 | 0.5913 | 69.95   | 1.0443 | -0.7418 |
| 4/24/2019 8:03 | 0.5917  | -0.3    | 10.1552 | -0.8417 | 0.5913 | 69.4364 | 1.0128 | -0.7418 |
| 4/24/2019 8:04 | 0.6     | -0.65   | 10.0995 | -0.5333 | 0.5913 | 68.7727 | 0.978  | -0.7418 |
| 4/24/2019 8:05 | 0.6     | -0.7    | 9.7023  | -0.8    | 0.5913 | 68.1    | 0.8713 | -0.7418 |
| 4/24/2019 8:06 | 0.6     | -0.9833 | 9.6     | -0.6333 | 0.5913 | 67.4818 | 1.0026 | -0.7418 |
| 4/24/2019 8:07 | 0.6     | -0.5833 | 9.551   | -0.9167 | 0.5913 | 66.9091 | 1.0795 | -0.7418 |
| 4/24/2019 8:08 | 0.6     | -0.1667 | 9.4683  | -0.5083 | 0.5913 | 66.325  | 1.0555 | -0.7418 |
| 4/24/2019 8:09 | 0.5667  | -0.95   | 9.0383  | -0.1417 | 0.5913 | 65.7917 | 1.0747 | -0.7418 |
| 4/24/2019 8:10 | 0.6     | -0.4    | 9.0165  | -0.2333 | 0.5913 | 65.2333 | 1.0507 | -0.7418 |
| 4/24/2019 8:11 | 0.6     | -0.25   | 8.9058  | -0.2833 | 0.5913 | 64.7091 | 0.9996 | -0.7418 |
| 4/24/2019 8:12 | 0.675   | -0.2833 | 8.6223  | -0.5667 | 0.5913 | 64.1667 | 0.9914 | -0.7418 |
| 4/24/2019 8:13 | 0.7     | -0.8167 | 9.311   | -0.4083 | 0.5913 | 63.5818 | 1.0028 | -0.7418 |
| 4/24/2019 8:14 | 0.675   | 0.3     | 8.3032  | -0.675  | 0.5913 | 63.0083 | 1.0234 | -0.7418 |
| 4/24/2019 8:15 | 0.7     | -0.8    | 8.4463  | -0.3083 | 0.5913 | 62.4455 | 0.9893 | -0.7418 |
| 4/24/2019 8:16 | 0.675   | -0.3333 | 8.4847  | -0.85   | 0.5913 | 61.9083 | 1.0181 | -0.7418 |
| 4/24/2019 8:17 | 0.6917  | -0.8667 | 8.3228  | -0.3167 | 0.5913 | 61.4182 | 1.0307 | -0.7418 |
| 4/24/2019 8:18 | 0.7     | 0.2333  | 8.1095  | -0.1833 | 0.5913 | 60.9    | 1.0246 | -0.7418 |
| 4/24/2019 8:19 | 0.7     | -0.3    | 7.7952  | -0.7083 | 0.5913 | 60.47   | 1.0203 | -0.7418 |
| 4/24/2019 8:20 | 0.675   | 0.1     | 7.8712  | -0.575  | 0.5913 | 59.9333 | 0.9872 | -0.7418 |
| 4/24/2019 8:21 | 0.6     | -0.1667 | 7.866   | -0.5833 | 0.5913 | 59.4364 | 0.651  | -0.7418 |
| 4/24/2019 8:22 | 0.625   | -0.4833 | 7.4647  | 0.0167  | 0.5913 | 58.85   | 0.5231 | -0.7418 |
| 4/24/2019 8:23 | 0.7     | -0.45   | 7.1083  | -0.4583 | 0.5913 | 57.83   | 0.4081 | -0.7418 |
| 4/24/2019 8:24 | 0.7333  | -0.5667 | 7.2905  | -0.1583 | 0.5913 | 57.125  | 0.4281 | -0.7418 |
| 4/24/2019 8:25 | 0.9833  | 2.5833  | 6.73    | 1.7917  | 0.5913 | 55.57   | 0.6136 | -0.7418 |
| 4/24/2019 8:26 | 1.65    | 2.9     | 7.1988  | 3.4083  | 0.5913 | 52.9833 | 0.5917 | -0.7418 |
| 4/24/2019 8:27 | 2.75    | 5.15    | 8.4547  | 5.1     | 0.5913 | 50.0273 | 0.4813 | -0.7418 |
| 4/24/2019 8:28 | 4.2167  | 9.4333  | 10.8118 | 9.475   | 0.5913 | 14.6667 | 0.4813 | -0.7418 |
| 4/24/2019 8:29 | 5.6333  | 9.7333  | 11.9883 | 10      | 0.5913 | 13.31   | 0.5304 | -0.7418 |
| 4/24/2019 8:30 | 7.2833  | 13.0333 | 13.72   | 13.2    | 0.5913 | 9.3667  | 0.502  | -0.7418 |
| 4/24/2019 8:31 | 8.3667  | 13.4167 | 14.6967 | 12.1417 | 0.5913 | 6.0182  | 0.4594 | -0.7418 |
| 4/24/2019 8:32 | 7.8667  | 6.3833  | 9.2925  | 6.1     | 0.5913 | 10.5546 | 0.4234 | -0.7418 |
| 4/24/2019 8:33 | 7.125   | 11.4833 | 12.0978 | 10.8833 | 0.5913 | 8.875   | 0.4196 | -0.7418 |
| 4/24/2019 8:34 | 6.875   | 11.3667 | 12.6233 | 12.1083 | 0.5913 | 5.1364  | 0.4146 | -0.7418 |
| 4/24/2019 8:35 | 7.9917  | 12.85   | 14.41   | 12.5167 | 0.5913 | 4.99    | 0.4008 | -0.7418 |
| 4/24/2019 8:36 | 9.425   | 16.3333 | 18.2033 | 17.0667 | 0.5913 | 3.1636  | 0.4351 | -0.7418 |
| 4/24/2019 8:37 | 9.8583  | 13.1167 | 15.7217 | 13.9667 | 0.5913 | 3.2167  | 0.342  | -0.7418 |
| 4/24/2019 8:38 | 10.3167 | 14.15   | 15.7317 | 14.325  | 0.5913 | 3.2167  | 0.3423 | -0.7418 |
| 4/24/2019 8:39 | 10.5583 | 17.15   | 18.0783 | 18.55   | 0.5913 | 2.425   | 0.3308 | -0.7418 |
| 4/24/2019 8:40 | 11.6    | 18.2    | 18.8883 | 18.6833 | 0.5913 | 1.7     | 0.3228 | -0.7418 |
| 4/24/2019 8:41 | 11.9917 | 15.7    | 16.2517 | 16      | 0.5913 | 1.7417  | 0.2957 | -0.7418 |
| 4/24/2019 8:42 | 11.7    | 14.1    | 15.9217 | 13.925  | 0.5913 | 1.8     | 0.3184 | -0.7418 |
| 4/24/2019 8:43 | 11.1167 | 16.75   | 16.4583 | 16.3583 | 0.5913 | 1.8     | 0.2933 | -0.7418 |
| 4/24/2019 8:44 | 11.6417 | 19.2333 | 18.9183 | 19.7833 | 0.5913 | 1.8818  | 0.2827 | -0.7418 |
| 4/24/2019 8:45 | 13.0167 | 21.1833 | 21.085  | 21.4917 | 0.5913 | 1.8727  | 0.2661 | -0.7418 |

|                |         |         |         |         |        |        |        |         |
|----------------|---------|---------|---------|---------|--------|--------|--------|---------|
| 4/24/2019 8:46 | 14.125  | 20.9167 | 20.63   | 21.3833 | 0.5913 | 1.8417 | 0.2639 | -0.7418 |
| 4/24/2019 8:47 | 15.2167 | 22.5833 | 23.0317 | 22.9333 | 0.5913 | 1.88   | 0.2965 | -0.7418 |
| 4/24/2019 8:48 | 15.5333 | 20.5333 | 21.53   | 21.5333 | 0.5913 | 1.8    | 0.2652 | -0.7418 |
| 4/24/2019 8:49 | 15.3833 | 18.75   | 19.8633 | 19.4    | 0.5913 | 1.8    | 0.2439 | -0.7418 |
| 4/24/2019 8:50 | 14.6417 | 19.1833 | 19.45   | 19.3    | 0.5913 | 1.8636 | 0.2282 | -0.7418 |
| 4/24/2019 8:51 | 14.2667 | 20.5    | 21.0183 | 20.975  | 0.5913 | 1.8    | 0.2238 | -0.7418 |
| 4/24/2019 8:52 | 14.7833 | 21.4    | 21.6567 | 21.325  | 0.5913 | 1.8    | 0.2545 | -0.7418 |
| 4/24/2019 8:53 | 15.35   | 21.55   | 21.9133 | 21.8083 | 0.5913 | 1.78   | 0.2313 | -0.7418 |
| 4/24/2019 8:54 | 15.475  | 21.05   | 21.4133 | 21.375  | 0.5913 | 1.7273 | 0.2044 | -0.7418 |
| 4/24/2019 8:55 | 15.3667 | 21.0667 | 21.3367 | 21.8833 | 0.5913 | 1.6636 | 0.2001 | -0.7418 |
| 4/24/2019 8:56 | 15.4083 | 21.6333 | 22.3567 | 21.9667 | 0.5913 | 1.6    | 0.1976 | -0.7418 |
| 4/24/2019 8:57 | 15.6083 | 21.5833 | 22.1583 | 21.5667 | 0.5913 | 1.6    | 0.2136 | -0.7418 |
| 4/24/2019 8:58 | 15.85   | 21.95   | 22.3683 | 22.35   | 0.5913 | 1.6    | 0.2079 | -0.7418 |
| 4/24/2019 8:59 | 15.9667 | 21.9833 | 22.5967 | 22.725  | 0.5913 | 1.5364 | 0.2003 | -0.7418 |
| 4/24/2019 9:00 | 16.15   | 22.1333 | 22.6183 | 22.2167 | 0.5913 | 1.5    | 0.1951 | -0.7418 |
| 4/24/2019 9:01 | 16.2    | 21.8333 | 22.4617 | 22.5833 | 0.5913 | 1.5    | 0.1892 | -0.7418 |
| 4/24/2019 9:02 | 16.15   | 21.8667 | 22.5367 | 22.125  | 0.5913 | 1.4417 | 0.1863 | -0.7418 |
| 4/24/2019 9:03 | 16.1    | 21.65   | 22.43   | 22.65   | 0.5913 | 1.4    | 0.1963 | -0.7418 |
| 4/24/2019 9:04 | 16.1833 | 22.0667 | 22.1767 | 21.9167 | 0.5913 | 1.4    | 0.1728 | -0.7418 |
| 4/24/2019 9:05 | 16.1833 | 21.7167 | 22.0917 | 22.5417 | 0.5913 | 1.3917 | 0.1864 | -0.7418 |
| 4/24/2019 9:06 | 16.2    | 21.9333 | 22.29   | 21.6833 | 0.5913 | 1.3    | 0.1717 | -0.7418 |
| 4/24/2019 9:07 | 16.1    | 21.2    | 22.1183 | 22.525  | 0.5913 | 1.3    | 0.1659 | -0.7418 |
| 4/24/2019 9:08 | 16.1417 | 21.6667 | 21.9467 | 21.7583 | 0.5913 | 1.3222 | 0.1815 | -0.7418 |
| 4/24/2019 9:09 | 16.1417 | 21.6167 | 22.1767 | 22.05   | 0.5913 | 1.3417 | 0.1654 | -0.7418 |
| 4/24/2019 9:10 | 16.3083 | 22.6333 | 22.7283 | 22.9583 | 0.5913 | 1.3    | 0.164  | -0.7418 |
| 4/24/2019 9:11 | 16.6583 | 22.5333 | 22.905  | 23.2833 | 0.5913 | 1.3    | 0.1669 | -0.7418 |
| 4/24/2019 9:12 | 16.8667 | 21.2833 | 22.5017 | 22.6    | 0.5913 | 1.3    | 0.1576 | -0.7418 |
| 4/24/2019 9:13 | 16.9    | 21.8167 | 22.745  | 22.7833 | 0.5913 | 1.3    | 0.1651 | -0.7418 |
| 4/24/2019 9:14 | 16.7917 | 22.5667 | 22.6283 | 23.025  | 0.5913 | 1.3    | 0.156  | -0.7418 |
| 4/24/2019 9:15 | 16.9917 | 23.1333 | 23.3567 | 23.9083 | 0.5913 | 1.3    | 0.1601 | -0.7418 |
| 4/24/2019 9:16 | 17.2167 | 22.6    | 23.27   | 23.4833 | 0.5913 | 1.3    | 0.1565 | -0.7418 |
| 4/24/2019 9:17 | 17.4833 | 22.9833 | 23.435  | 23.2917 | 0.5913 | 1.3    | 0.1652 | -0.7418 |
| 4/24/2019 9:18 | 17.4833 | 22.5    | 22.9233 | 22.8083 | 0.5913 | 1.3    | 0.1843 | -0.7418 |
| 4/24/2019 9:19 | 17.3417 | 22.0167 | 22.37   | 22.6167 | 0.5913 | 1.3    | 0.1889 | -0.7418 |
| 4/24/2019 9:20 | 17.0333 | 22.8    | 22.3    | 22.5333 | 0.5913 | 1.2182 | 0.1916 | -0.7418 |
| 4/24/2019 9:21 | 16.7583 | 20.6833 | 21.94   | 21.475  | 0.5913 | 1.2    | 0.1924 | -0.7418 |
| 4/24/2019 9:22 | 16.475  | 20.65   | 21.0067 | 21.1    | 0.5913 | 1.2    | 0.1956 | -0.7418 |
| 4/24/2019 9:23 | 16.05   | 19.85   | 20.5133 | 20.6167 | 0.5913 | 1.2    | 0.1946 | -0.7418 |
| 4/24/2019 9:24 | 15.5833 | 19.0833 | 19.77   | 20.5583 | 0.5913 | 1.275  | 0.2164 | -0.7418 |
| 4/24/2019 9:25 | 15.175  | 18.2667 | 19.5183 | 18.95   | 0.5913 | 1.3    | 0.2    | -0.7418 |
| 4/24/2019 9:26 | 14.8917 | 18.7667 | 19.14   | 19.0333 | 0.5913 | 1.3    | 0.201  | -0.7418 |
| 4/24/2019 9:27 | 14.625  | 18.0167 | 18.8617 | 18.7583 | 0.5913 | 1.3273 | 0.2025 | -0.7418 |
| 4/24/2019 9:28 | 14.3417 | 17.5667 | 18.2583 | 18.15   | 0.5913 | 1.4    | 0.1882 | -0.7418 |
| 4/24/2019 9:29 | 14.0333 | 16.75   | 18.1583 | 17.8083 | 0.5913 | 1.4    | 0.2027 | -0.7418 |
| 4/24/2019 9:30 | 13.7417 | 16.8833 | 17.8583 | 17.025  | 0.5913 | 1.4    | 0.1959 | -0.7418 |
| 4/24/2019 9:31 | 12.625  | 11.55   | 16.8117 | 11.8083 | 0.5913 | 1.8273 | 0.1852 | -0.7418 |
| 4/24/2019 9:32 | 10.0917 | 6.3167  | 24.7333 | 7.5417  | 0.5913 | 3.6167 | 0.1986 | -0.7418 |

|                 |        |         |         |         |        |         |        |         |
|-----------------|--------|---------|---------|---------|--------|---------|--------|---------|
| 4/24/2019 9:33  | 7.475  | 6.4667  | 34.175  | 6.525   | 0.5913 | 5.06    | 0.1863 | -0.7418 |
| 4/24/2019 9:34  | 5.45   | 4.3333  | 34.9642 | 4.9417  | 0.5913 | 6.29    | 0.2173 | -0.7418 |
| 4/24/2019 9:35  | 4.4333 | 3.35    | 31      | 3.2583  | 0.5913 | 7.5     | 0.2373 | -0.7418 |
| 4/24/2019 9:36  | 3.35   | 1       | 31.36   | 1.9167  | 0.5913 | 9.0545  | 0.2495 | -0.7418 |
| 4/24/2019 9:37  | 2.4167 | 0.5     | 32.2733 | 1.175   | 0.5913 | 10.5833 | 0.2818 | -0.7418 |
| 4/24/2019 9:38  | 1.825  | 0.4833  | 31.9283 | 0.6833  | 0.5913 | 12.15   | 0.3219 | -0.7418 |
| 4/24/2019 9:39  | 1.4417 | -0.0333 | 32.49   | 0.6583  | 0.5913 | 13.6917 | 0.2923 | -0.7418 |
| 4/24/2019 9:40  | 1.2    | -0.45   | 31.2625 | 0.7583  | 0.5913 | 15.1917 | 0.3046 | -0.7418 |
| 4/24/2019 9:41  | 1.0417 | 0.15    | 30.7275 | 0.15    | 0.5913 | 16.6545 | 0.2892 | -0.7418 |
| 4/24/2019 9:42  | 1      | -0.3    | 30.0025 | 0.0417  | 0.5913 | 18.1909 | 0.2941 | -0.7418 |
| 4/24/2019 9:43  | 0.9    | 0.3667  | 29.4758 | 0.6167  | 0.5913 | 19.35   | 0.3177 | -0.7418 |
| 4/24/2019 9:44  | 0.875  | -0.55   | 28.8542 | -0.2    | 0.5913 | 19.4091 | 0.2978 | -0.7418 |
| 4/24/2019 9:45  | 0.8    | -1.1    | 28.7167 | 0.4     | 0.5913 | 19.2083 | 0.3175 | -0.7418 |
| 4/24/2019 9:46  | 0.8    | -0.55   | 27.81   | -0.1167 | 0.5913 | 19.5    | 0.3318 | -0.7418 |
| 4/24/2019 9:47  | 0.8    | -0.0667 | 27.4483 | -0.1417 | 0.5913 | 19.6667 | 0.3403 | -0.7418 |
| 4/24/2019 9:48  | 0.8    | 0       | 26.9008 | 0.15    | 0.5913 | 19.62   | 0.3538 | -0.7418 |
| 4/24/2019 9:49  | 0.8167 | -0.0833 | 26.2125 | 0.125   | 0.5913 | 19.5167 | 0.3695 | -0.7418 |
| 4/24/2019 9:50  | 0.8273 | -0.9167 | 25.7275 | 0.3333  | 0.5913 | 19.3546 | 0.3958 | -0.7418 |
| 4/24/2019 9:51  | 0.8    | -0.8    | 25.0483 | 0.0417  | 0.5913 | 19.1667 | 0.4375 | -0.7418 |
| 4/24/2019 9:52  | 0.8    | 0.0667  | 24.4717 | -0.0417 | 0.5913 | 18.98   | 0.4765 | -0.7418 |
| 4/24/2019 9:53  | 0.8    | -0.4833 | 24.2583 | -0.3667 | 0.5913 | 18.8083 | 0.5582 | -0.7418 |
| 4/24/2019 9:54  | 0.775  | -0.15   | 23.9717 | -0.075  | 0.5913 | 18.6364 | 0.5155 | -0.7418 |
| 4/24/2019 9:55  | 0.7    | -0.65   | 23.1967 | 0.4667  | 0.5913 | 18.5091 | 0.5083 | -0.7418 |
| 4/24/2019 9:56  | 0.6    | 0.6833  | 22.9675 | -0.1167 | 0.5913 | 18.375  | 0.5224 | -0.7418 |
| 4/24/2019 9:57  | 0.6    | 0.3333  | 22.275  | -0.025  | 0.5913 | 18.25   | 0.515  | -0.7418 |
| 4/24/2019 9:58  | 0.675  | -1.5833 | 21.9433 | 0.2417  | 0.5913 | 18.0455 | 0.5527 | -0.7418 |
| 4/24/2019 9:59  | 0.7    | 0.1333  | 21.5892 | -0.4    | 0.5913 | 17.9333 | 0.6224 | -0.7418 |
| 4/24/2019 10:00 | 0.7    | -0.35   | 21.2425 | -0.5    | 0.5913 | 17.8083 | 0.606  | -0.7418 |
| 4/24/2019 10:01 | 0.7    | 0.3167  | 21.0492 | -0.1583 | 0.5913 | 17.6417 | 0.6226 | -0.7418 |
| 4/24/2019 10:02 | 0.7167 | -0.5333 | 20.8192 | -0.1167 | 0.5913 | 17.5    | 0.5685 | -0.7418 |
| 4/24/2019 10:03 | 0.7    | -0.5833 | 20.0525 | -0.4583 | 0.5913 | 17.4167 | 0.5687 | -0.7418 |
| 4/24/2019 10:04 | 0.7    | -0.15   | 19.9683 | 0.0417  | 0.5913 | 17.27   | 0.5262 | -0.7418 |
| 4/24/2019 10:05 | 0.7    | -0.4833 | 19.8008 | -0.3333 | 0.5913 | 17.1167 | 0.4897 | -0.7418 |
| 4/24/2019 10:06 | 0.6917 | -0.4333 | 19.3675 | -0.125  | 0.5913 | 16.9818 | 0.4924 | -0.7418 |
| 4/24/2019 10:07 | 0.6667 | -0.7667 | 18.7617 | -0.2417 | 0.5913 | 16.8167 | 0.5103 | -0.7418 |
| 4/24/2019 10:08 | 0.6    | 0.0667  | 18.7717 | -0.45   | 0.5913 | 16.6636 | 0.5255 | -0.7418 |
| 4/24/2019 10:09 | 0.6    | -0.35   | 18.3725 | -0.4917 | 0.5913 | 16.5364 | 0.6024 | -0.7418 |
| 4/24/2019 10:10 | 0.6    | 0.4667  | 18.2708 | -0.5583 | 0.5913 | 16.45   | 0.6452 | -0.7418 |
| 4/24/2019 10:11 | 0.6    | 0.1667  | 18.01   | -0.4833 | 0.5913 | 16.2667 | 0.6808 | -0.7418 |
| 4/24/2019 10:12 | 0.6833 | 0.1     | 17.4483 | -0.3833 | 0.5913 | 16.1545 | 0.7403 | -0.7418 |
| 4/24/2019 10:13 | 0.7    | 0.1     | 17.3567 | -0.25   | 0.5913 | 16.0333 | 0.6752 | -0.7418 |
| 4/24/2019 10:14 | 0.7    | -0.5167 | 17.2783 | -0.8    | 0.5913 | 15.8546 | 0.6298 | -0.7418 |
| 4/24/2019 10:15 | 0.6667 | 0.0167  | 16.78   | -0.425  | 0.5913 | 15.7667 | 0.6179 | -0.7418 |
| 4/24/2019 10:16 | 0.6    | -0.9167 | 16.74   | -0.2333 | 0.5913 | 15.6889 | 0.6341 | -0.7418 |
| 4/24/2019 10:17 | 0.6    | -0.5833 | 16.0683 | 0.225   | 0.5913 | 15.575  | 0.6086 | -0.7418 |
| 4/24/2019 10:18 | 0.6    | 0.05    | 16.1708 | 0.025   | 0.5913 | 15.5    | 0.5972 | -0.7418 |
| 4/24/2019 10:19 | 0.6    | -0.2167 | 16.1158 | 0.3083  | 0.5913 | 15.3818 | 0.6137 | -0.7418 |

|                 |         |         |         |         |        |         |        |         |
|-----------------|---------|---------|---------|---------|--------|---------|--------|---------|
| 4/24/2019 10:20 | 0.6     | -0.1667 | 15.7492 | -0.2917 | 0.5913 | 15.2727 | 0.6203 | -0.7418 |
| 4/24/2019 10:21 | 0.6     | -0.4667 | 15.4192 | 0.2333  | 0.5913 | 15.125  | 0.6047 | -0.7418 |
| 4/24/2019 10:22 | 0.6     | -0.2    | 15.2308 | 0.2     | 0.5913 | 15.0091 | 0.571  | -0.7418 |
| 4/24/2019 10:23 | 0.6     | 0.0833  | 14.9967 | 0.3667  | 0.5913 | 14.9    | 0.5626 | -0.7418 |
| 4/24/2019 10:24 | 0.6     | -0.2833 | 14.7967 | 0.1     | 0.5913 | 14.7273 | 0.6056 | -0.7418 |
| 4/24/2019 10:25 | 0.6     | 0.2833  | 15.15   | 0.3167  | 0.5913 | 14.6417 | 0.572  | -0.7418 |
| 4/24/2019 10:26 | 0.6     | -0.7167 | 14.8042 | -0.1833 | 0.5913 | 14.5273 | 0.5378 | -0.7418 |
| 4/24/2019 10:27 | 0.575   | -0.4833 | 14.2908 | -0.2583 | 0.5913 | 14.4417 | 0.4799 | -0.7418 |
| 4/24/2019 10:28 | 0.525   | -0.6    | 14.0767 | -0.35   | 0.5913 | 14.3    | 0.4728 | -0.7418 |
| 4/24/2019 10:29 | 0.5833  | -0.1667 | 13.7075 | -0.5667 | 0.5913 | 14.175  | 0.5236 | -0.7418 |
| 4/24/2019 10:30 | 0.6     | -0.2167 | 13.8583 | -0.5    | 0.5913 | 14.0636 | 0.5384 | -0.7418 |
| 4/24/2019 10:31 | 0.5667  | -0.65   | 13.7    | -0.05   | 0.5913 | 14      | 0.5653 | -0.7418 |
| 4/24/2019 10:32 | 0.5     | -0.25   | 13.5475 | 0.0833  | 0.5913 | 13.9091 | 0.5704 | -0.7418 |
| 4/24/2019 10:33 | 0.6     | -0.2167 | 13.4483 | -0.325  | 0.5913 | 13.7833 | 0.5727 | -0.7418 |
| 4/24/2019 10:34 | 0.65    | -0.0333 | 13.0142 | -0.1083 | 0.5913 | 13.675  | 0.5449 | -0.7418 |
| 4/24/2019 10:35 | 0.7     | -0.5    | 13.2    | -0.2667 | 0.5913 | 13.5917 | 0.5262 | -0.7418 |
| 4/24/2019 10:36 | 0.6333  | 0.0667  | 12.6142 | -0.3    | 0.5913 | 13.5    | 0.508  | -0.7418 |
| 4/24/2019 10:37 | 0.625   | -0.55   | 12.9325 | 0.175   | 0.5913 | 13.4    | 0.5181 | -0.7418 |
| 4/24/2019 10:38 | 0.6     | -0.35   | 12.8092 | -0.275  | 0.5913 | 13.2818 | 0.5116 | -0.7418 |
| 4/24/2019 10:39 | 0.6     | 0.6333  | 12.2967 | -0.1083 | 0.5913 | 13.1083 | 0.5329 | -0.7418 |
| 4/24/2019 10:40 | 0.6     | -0.4333 | 12.455  | -0.125  | 0.5913 | 12.9583 | 0.5398 | -0.7418 |
| 4/24/2019 10:41 | 0.6     | -0.1    | 12.3875 | -0.2667 | 0.5913 | 12.8167 | 0.5142 | -0.7418 |
| 4/24/2019 10:42 | 0.6     | -0.8167 | 11.9642 | 0.2417  | 0.5913 | 12.7364 | 0.5188 | -0.7418 |
| 4/24/2019 10:43 | 0.6     | -0.35   | 11.9758 | -0.2583 | 0.5913 | 12.6091 | 0.5228 | -0.7418 |
| 4/24/2019 10:44 | 0.6     | -0.5333 | 11.7358 | 0.1083  | 0.5913 | 12.4364 | 0.5136 | -0.7418 |
| 4/24/2019 10:45 | 0.6583  | -0.2667 | 11.5967 | -0.35   | 0.5913 | 12.3333 | 0.5154 | -0.7418 |
| 4/24/2019 10:46 | 0.7     | -0.5167 | 11.6908 | -0.3833 | 0.5913 | 12.2556 | 0.4909 | -0.7418 |
| 4/24/2019 10:47 | 0.6917  | -0.7833 | 11.6525 | 0.1167  | 0.5913 | 12.1909 | 0.5478 | -0.7418 |
| 4/24/2019 10:48 | 0.6083  | 0.8     | 10.9925 | 0.075   | 0.5913 | 12.1    | 0.5972 | -0.7418 |
| 4/24/2019 10:49 | 0.6     | -0.1167 | 11.4758 | -0.5    | 0.5913 | 12.0333 | 0.5787 | -0.7418 |
| 4/24/2019 10:50 | 0.6     | -0.5833 | 11.2767 | 0.2417  | 0.5913 | 12      | 0.5541 | -0.7418 |
| 4/24/2019 10:51 | 0.8     | 0.8     | 11.2133 | 1.7667  | 0.5913 | 11.89   | 0.4904 | -0.7418 |
| 4/24/2019 10:52 | 1.4167  | 1.75    | 10.9667 | 0.925   | 0.5913 | 11.62   | 0.2928 | -0.7418 |
| 4/24/2019 10:53 | 2.2     | 6       | 12.0808 | 6.3083  | 0.5913 | 11.4    | 0.4729 | -0.7418 |
| 4/24/2019 10:54 | 4.2167  | 9.85    | 15.3283 | 9.5833  | 0.5913 | 10.93   | 0.5448 | -0.7418 |
| 4/24/2019 10:55 | 5.625   | 8.75    | 14.2533 | 9.2833  | 0.5913 | 10.425  | 0.6025 | -0.7418 |
| 4/24/2019 10:56 | 6.8917  | 8.35    | 13.9817 | 8.8     | 0.5913 | 9.9636  | 0.5902 | -0.7418 |
| 4/24/2019 10:57 | 6.9583  | 9.7     | 14.55   | 10.075  | 0.5913 | 9.3818  | 0.5301 | -0.7418 |
| 4/24/2019 10:58 | 7.825   | 12.2667 | 15.9342 | 12.1917 | 0.5913 | 8.7182  | 0.4695 | -0.7418 |
| 4/24/2019 10:59 | 8.6167  | 11.3    | 15.2342 | 11.275  | 0.5913 | 8.05    | 0.4842 | -0.7418 |
| 4/24/2019 11:00 | 9.3417  | 13.7667 | 15.8067 | 13.825  | 0.5913 | 7.2636  | 0.5246 | -0.7418 |
| 4/24/2019 11:01 | 10.35   | 16.5333 | 18.6808 | 16.425  | 0.5913 | 6.4909  | 0.4402 | -0.7418 |
| 4/24/2019 11:02 | 11.1083 | 15.2833 | 17.0983 | 15.025  | 0.5913 | 5.75    | 0.3951 | -0.7418 |
| 4/24/2019 11:03 | 11.8    | 15.8667 | 17.995  | 16.025  | 0.5913 | 5.0333  | 0.3747 | -0.7418 |
| 4/24/2019 11:04 | 12      | 17.15   | 19.7583 | 17.3167 | 0.5913 | 4.4364  | 0.3452 | -0.7418 |
| 4/24/2019 11:05 | 12.9583 | 19.0667 | 20.7017 | 19.775  | 0.5913 | 3.7636  | 0.3455 | -0.7418 |
| 4/24/2019 11:06 | 14.0667 | 20.15   | 21.1333 | 21.2833 | 0.5913 | 3.3818  | 0.3229 | -0.7418 |

|                 |         |         |         |         |        |        |        |         |
|-----------------|---------|---------|---------|---------|--------|--------|--------|---------|
| 4/24/2019 11:07 | 15.0333 | 21.45   | 22.93   | 22.3833 | 0.5913 | 3.0091 | 0.3028 | -0.7418 |
| 4/24/2019 11:08 | 15.7333 | 20.8667 | 22.24   | 21.9583 | 0.5913 | 2.6636 | 0.2943 | -0.7418 |
| 4/24/2019 11:09 | 16.4333 | 21.35   | 23.06   | 21.925  | 0.5913 | 2.3583 | 0.2688 | -0.7418 |
| 4/24/2019 11:10 | 16.5833 | 19.9167 | 21.5633 | 21.1167 | 0.5913 | 2.0727 | 0.2644 | -0.7418 |
| 4/24/2019 11:11 | 16.7167 | 22.1333 | 23.1167 | 23.1917 | 0.5913 | 1.9583 | 0.2795 | -0.7418 |
| 4/24/2019 11:12 | 16.875  | 21.6167 | 22.8167 | 22.55   | 0.5913 | 1.7727 | 0.2513 | -0.7418 |
| 4/24/2019 11:13 | 17.325  | 22.95   | 23.7017 | 23.7083 | 0.5913 | 1.5917 | 0.245  | -0.7418 |
| 4/24/2019 11:14 | 17.4917 | 21.9167 | 22.3433 | 22.6833 | 0.5913 | 1.49   | 0.25   | -0.7418 |
| 4/24/2019 11:15 | 17.5917 | 22.5333 | 23.49   | 22.85   | 0.5913 | 1.3667 | 0.2229 | -0.7418 |
| 4/24/2019 11:16 | 18.0333 | 25.3667 | 25.6683 | 25.1583 | 0.5913 | 1.3    | 0.2556 | -0.7418 |
| 4/24/2019 11:17 | 18.7917 | 25.2667 | 25.8133 | 26.1417 | 0.5913 | 1.2417 | 0.2528 | -0.7418 |
| 4/24/2019 11:18 | 19.4583 | 24.3167 | 24.8183 | 24.5333 | 0.5913 | 1.15   | 0.252  | -0.7418 |
| 4/24/2019 11:19 | 19.55   | 25.15   | 25.83   | 25.15   | 0.5913 | 1.1    | 0.2467 | -0.7418 |
| 4/24/2019 11:20 | 19.8167 | 25.7667 | 26.135  | 26.3167 | 0.5913 | 1.07   | 0.2116 | -0.7418 |
| 4/24/2019 11:21 | 20.1182 | 24.6333 | 26.0567 | 25.4667 | 0.5913 | 1.0583 | 0.2001 | -0.7418 |
| 4/24/2019 11:22 | 20.575  | 26.4667 | 27.1183 | 26.4417 | 0.5913 | 1      | 0.1968 | -0.7418 |
| 4/24/2019 11:23 | 20.625  | 26.1    | 26.26   | 25.425  | 0.5913 | 0.95   | 0.1819 | -0.7418 |
| 4/24/2019 11:24 | 20.8083 | 27.2833 | 27.4083 | 27.4833 | 0.5913 | 0.9    | 0.1838 | -0.7418 |
| 4/24/2019 11:25 | 21.1333 | 26.8167 | 27.2317 | 27.55   | 0.5913 | 0.9    | 0.177  | -0.7418 |
| 4/24/2019 11:26 | 21.4083 | 27.5333 | 27.6083 | 27.8417 | 0.5913 | 0.9    | 0.1722 | -0.7418 |
| 4/24/2019 11:27 | 21.5417 | 26.85   | 26.995  | 27.3833 | 0.5913 | 0.8917 | 0.1705 | -0.7418 |
| 4/24/2019 11:28 | 21.45   | 26.5    | 26.3133 | 27.275  | 0.5913 | 0.8636 | 0.1654 | -0.7418 |
| 4/24/2019 11:29 | 21.4    | 27.0833 | 27.275  | 27.8167 | 0.5913 | 0.8    | 0.1665 | -0.7418 |
| 4/24/2019 11:30 | 21.4917 | 27.2333 | 27.1767 | 27.8833 | 0.5913 | 0.8    | 0.1637 | -0.7418 |
| 4/24/2019 11:31 | 21.55   | 26.5167 | 26.61   | 26.8667 | 0.5913 | 0.8    | 0.1635 | -0.7418 |
| 4/24/2019 11:32 | 21.625  | 27.5    | 27.4533 | 27.725  | 0.5913 | 0.7333 | 0.1641 | -0.7418 |
| 4/24/2019 11:33 | 21.4167 | 26.05   | 26.3767 | 26.75   | 0.5913 | 0.7    | 0.1585 | -0.7418 |
| 4/24/2019 11:34 | 21.3917 | 26.9833 | 26.215  | 27.8167 | 0.5913 | 0.7    | 0.1544 | -0.7418 |
| 4/24/2019 11:35 | 21.6083 | 28.0167 | 27.73   | 28.825  | 0.5913 | 0.7    | 0.1496 | -0.7418 |
| 4/24/2019 11:36 | 21.9417 | 27.5333 | 27.375  | 27.725  | 0.5913 | 0.7    | 0.1423 | -0.7418 |
| 4/24/2019 11:37 | 21.825  | 25.85   | 26.3783 | 26.825  | 0.5913 | 0.7    | 0.1518 | -0.7418 |
| 4/24/2019 11:38 | 21.5167 | 26.9833 | 26.5867 | 27.0917 | 0.5913 | 0.7    | 0.1464 | -0.7418 |
| 4/24/2019 11:39 | 21.225  | 27.1667 | 26.63   | 27.4917 | 0.5913 | 0.7    | 0.1464 | -0.7418 |
| 4/24/2019 11:40 | 21.6167 | 28.1    | 27.25   | 27.925  | 0.5913 | 0.7    | 0.1699 | -0.7418 |
| 4/24/2019 11:41 | 21.9917 | 27.9833 | 27.8583 | 27.5583 | 0.5913 | 0.6727 | 0.1479 | -0.7418 |
| 4/24/2019 11:42 | 22.5167 | 27.85   | 27.4433 | 28.8167 | 0.5913 | 0.7    | 0.144  | -0.7418 |
| 4/24/2019 11:43 | 22.6083 | 28.1333 | 27.4367 | 27.9333 | 0.5913 | 0.7    | 0.1469 | -0.7418 |
| 4/24/2019 11:44 | 22.4083 | 27.5333 | 26.8483 | 27.2333 | 0.5913 | 0.7    | 0.1275 | -0.7418 |
| 4/24/2019 11:45 | 22.1    | 27.1333 | 26.9367 | 27.3917 | 0.5913 | 0.7    | 0.1466 | -0.7418 |
| 4/24/2019 11:46 | 21.65   | 26.4167 | 25.5167 | 26.325  | 0.5913 | 0.7091 | 0.1463 | -0.7418 |
| 4/24/2019 11:47 | 21.5833 | 26.65   | 26.6767 | 27.2167 | 0.5913 | 0.8    | 0.1348 | -0.7418 |
| 4/24/2019 11:48 | 21.25   | 25.7833 | 25.5417 | 26.1    | 0.5913 | 0.8    | 0.1505 | -0.7418 |
| 4/24/2019 11:49 | 21.35   | 26.8167 | 26.5167 | 27.1    | 0.5913 | 0.8    | 0.1442 | -0.7418 |
| 4/24/2019 11:50 | 21.2167 | 25.1667 | 25.67   | 26.1667 | 0.5913 | 0.8    | 0.1318 | -0.7418 |
| 4/24/2019 11:51 | 21.3833 | 26.6333 | 25.93   | 26.8417 | 0.5913 | 0.8    | 0.1431 | -0.7418 |
| 4/24/2019 11:52 | 21.375  | 25.75   | 25.715  | 26.2417 | 0.5913 | 0.85   | 0.1398 | -0.7418 |
| 4/24/2019 11:53 | 21.475  | 25.3167 | 26.0917 | 26.625  | 0.5913 | 0.9    | 0.1429 | -0.7418 |

|                 |         |         |         |         |        |         |        |         |
|-----------------|---------|---------|---------|---------|--------|---------|--------|---------|
| 4/24/2019 11:54 | 21.65   | 27.1333 | 26.6067 | 27.7417 | 0.5913 | 0.9     | 0.1427 | -0.7418 |
| 4/24/2019 11:55 | 21.9167 | 26.75   | 26.5983 | 27.925  | 0.5913 | 0.9     | 0.1317 | -0.7418 |
| 4/24/2019 11:56 | 22.175  | 26.9833 | 27.3783 | 27.8917 | 0.5913 | 0.9     | 0.1409 | -0.7418 |
| 4/24/2019 11:57 | 22.5333 | 27.55   | 27.4433 | 28.0583 | 0.5913 | 0.9     | 0.1404 | -0.7418 |
| 4/24/2019 11:58 | 22.45   | 26.35   | 26.1333 | 25.8583 | 0.5913 | 0.9     | 0.1326 | -0.7418 |
| 4/24/2019 11:59 | 22.1917 | 26.05   | 26.0933 | 26.8417 | 0.5913 | 0.875   | 0.1433 | -0.7418 |
| 4/24/2019 12:00 | 21.5333 | 24.45   | 24.94   | 25.6417 | 0.5913 | 0.8     | 0.1274 | -0.7418 |
| 4/24/2019 12:01 | 21.2667 | 25.9167 | 25.2033 | 25.4917 | 0.5913 | 0.8     | 0.1354 | -0.7418 |
| 4/24/2019 12:02 | 21.1917 | 25.1    | 26.0517 | 26.725  | 0.5913 | 0.8     | 0.1402 | -0.7418 |
| 4/24/2019 12:03 | 21.4417 | 26.8167 | 26.0217 | 26.6083 | 0.5913 | 0.8     | 0.1265 | -0.7418 |
| 4/24/2019 12:04 | 21.5333 | 24.25   | 25.3267 | 24.675  | 0.5913 | 0.7417  | 0.1409 | -0.7418 |
| 4/24/2019 12:05 | 20.9167 | 22.9833 | 23.6917 | 23.8917 | 0.5913 | 0.7     | 0.1407 | -0.7418 |
| 4/24/2019 12:06 | 20.1167 | 22.75   | 22.8633 | 23.4917 | 0.5913 | 0.7     | 0.1344 | -0.7418 |
| 4/24/2019 12:07 | 19.4083 | 21.2833 | 22.8967 | 22.9417 | 0.5913 | 0.7     | 0.1452 | -0.7418 |
| 4/24/2019 12:08 | 18.8167 | 20.85   | 21.485  | 21.725  | 0.5913 | 0.675   | 0.131  | -0.7418 |
| 4/24/2019 12:09 | 18.1417 | 20.4667 | 20.5883 | 20.4167 | 0.5913 | 0.7     | 0.1304 | -0.7418 |
| 4/24/2019 12:10 | 17.1    | 18.6333 | 19.1083 | 19.0917 | 0.5913 | 0.7     | 0.145  | -0.7418 |
| 4/24/2019 12:11 | 16.2667 | 18.0667 | 18.4667 | 17.9917 | 0.5913 | 0.7182  | 0.1268 | -0.7418 |
| 4/24/2019 12:12 | 15.5667 | 18.2333 | 18.3033 | 17.9167 | 0.5913 | 0.8     | 0.1422 | -0.7418 |
| 4/24/2019 12:13 | 15.3417 | 17.7333 | 18.38   | 18.1917 | 0.5913 | 0.8182  | 0.1391 | -0.7418 |
| 4/24/2019 12:14 | 15.35   | 17.8    | 18.9517 | 18.8583 | 0.5913 | 0.9     | 0.1382 | -0.7418 |
| 4/24/2019 12:15 | 15.5833 | 19.1    | 19.1117 | 19.1    | 0.5913 | 0.9     | 0.1502 | -0.7418 |
| 4/24/2019 12:16 | 15.5833 | 17.9    | 18.7233 | 18.5583 | 0.5913 | 0.9818  | 0.1428 | -0.7418 |
| 4/24/2019 12:17 | 15.475  | 17.2833 | 18.2267 | 17.6833 | 0.5913 | 1.0091  | 0.1564 | -0.7418 |
| 4/24/2019 12:18 | 14.95   | 17.05   | 17.435  | 16.8417 | 0.5913 | 1.1     | 0.1454 | -0.7418 |
| 4/24/2019 12:19 | 14.2667 | 15.7    | 16.4817 | 15.6583 | 0.5913 | 1.1583  | 0.1316 | -0.7418 |
| 4/24/2019 12:20 | 13.5083 | 14.3667 | 15.4967 | 15.0667 | 0.5913 | 1.22    | 0.1443 | -0.7418 |
| 4/24/2019 12:21 | 12.8583 | 14.3167 | 14.9717 | 14.575  | 0.5913 | 1.3     | 0.1329 | -0.7418 |
| 4/24/2019 12:22 | 12.2417 | 13.4    | 14.52   | 13.9917 | 0.5913 | 1.3     | 0.1422 | -0.7418 |
| 4/24/2019 12:23 | 11.8167 | 13.4    | 14.2    | 13.5917 | 0.5913 | 1.3833  | 0.1492 | -0.7418 |
| 4/24/2019 12:24 | 11.7    | 13.85   | 14.5183 | 13.7    | 0.5913 | 1.4     | 0.1385 | -0.7418 |
| 4/24/2019 12:25 | 11.6417 | 13.3833 | 14.0583 | 12.9667 | 0.5913 | 1.4     | 0.1495 | -0.7418 |
| 4/24/2019 12:26 | 11.3917 | 12.6333 | 13.2817 | 12.6333 | 0.5913 | 1.4     | 0.149  | -0.7418 |
| 4/24/2019 12:27 | 11.3    | 13.0833 | 14.3133 | 14.4417 | 0.5913 | 1.4091  | 0.1395 | -0.7418 |
| 4/24/2019 12:28 | 11.4    | 13.4667 | 14.54   | 14.0917 | 0.5913 | 1.5     | 0.1552 | -0.7418 |
| 4/24/2019 12:29 | 11.5    | 12.1    | 13.8367 | 13.05   | 0.5913 | 1.5     | 0.1528 | -0.7418 |
| 4/24/2019 12:30 | 11.2083 | 12.8833 | 13.105  | 12.4417 | 0.5913 | 1.5833  | 0.1798 | -0.7418 |
| 4/24/2019 12:31 | 10.7    | 12      | 13.2533 | 12.2417 | 0.5913 | 1.9833  | 0.2005 | -0.7418 |
| 4/24/2019 12:32 | 10.1167 | 9.8333  | 11.1942 | 9.6917  | 0.5913 | 2.22    | 0.1567 | -0.7418 |
| 4/24/2019 12:33 | 8.775   | 6.2333  | 11.9992 | 6.0417  | 0.5913 | 3.5     | 0.164  | -0.7418 |
| 4/24/2019 12:34 | 6.325   | 1.6667  | 21.02   | 2.1583  | 0.5913 | 32.5667 | 0.1602 | -0.7418 |
| 4/24/2019 12:35 | 3.5583  | 0.0667  | 22.7408 | 0.8583  | 0.5913 | 60.3    | 0.1605 | -0.7418 |
| 4/24/2019 12:36 | 1.6917  | 0.7667  | 31.5817 | 0.7     | 0.5913 | 63.5917 | 0.1653 | -0.7418 |
| 4/24/2019 12:37 | 0.9417  | 0.0333  | 56.8725 | 1.1667  | 0.5913 | 68.1889 | 0.163  | -0.7418 |
| 4/24/2019 12:38 | 0.7     | -0.7167 | 59.375  | 1.0583  | 0.5913 | 70.9833 | 0.1628 | -0.7418 |
| 4/24/2019 12:39 | 0.6     | -0.2333 | 57.2283 | 0.9917  | 0.5913 | 75.3    | 0.1772 | -0.7418 |
| 4/24/2019 12:40 | 0.5     | -0.5333 | 54.495  | 0.5583  | 0.5913 | 72.9091 | 0.1658 | -0.7418 |

|                 |        |         |         |         |        |         |        |         |
|-----------------|--------|---------|---------|---------|--------|---------|--------|---------|
| 4/24/2019 12:41 | 0.5417 | -1.0167 | 51.2675 | 0.45    | 0.5913 | 73.57   | 0.177  | -0.7418 |
| 4/24/2019 12:42 | 0.5667 | -0.6667 | 50.1625 | 0.6333  | 0.5913 | 71.825  | 0.2584 | -0.7418 |
| 4/24/2019 12:43 | 0.6    | -0.2167 | 49.1825 | 0.5417  | 0.5913 | 68.94   | 1.9807 | -0.7418 |
| 4/24/2019 12:44 | 0.6    | -0.1    | 49.005  | 0.9917  | 0.5913 | 71.5    | 2.4142 | -0.7418 |
| 4/24/2019 12:45 | 0.5917 | -1.0167 | 47.4267 | 0.875   | 0.5913 | 71.3    | 2.3988 | -0.7418 |
| 4/24/2019 12:46 | 0.6    | -0.5167 | 46.2942 | 0.275   | 0.5913 | 70.35   | 2.4063 | -0.7418 |
| 4/24/2019 12:47 | 0.5917 | -0.5333 | 44.6417 | 0.675   | 0.5913 | 70.1091 | 2.3995 | -0.7418 |
| 4/24/2019 12:48 | 0.5667 | -1.1167 | 43.7833 | 0.2667  | 0.5913 | 69.9583 | 2.3988 | -0.7418 |
| 4/24/2019 12:49 | 0.5833 | -0.0833 | 42.6025 | 0.2417  | 0.5913 | 69.64   | 2.389  | -0.7418 |
| 4/24/2019 12:50 | 0.6    | -0.25   | 41.8692 | 0.675   | 0.5913 | 69.3    | 2.3818 | -0.7418 |
| 4/24/2019 12:51 | 0.6917 | -0.7833 | 40.84   | 0.1417  | 0.5913 | 68.85   | 2.3858 | -0.7418 |
| 4/24/2019 12:52 | 0.7    | -0.35   | 39.7783 | 0.1583  | 0.5913 | 68.4333 | 2.4017 | -0.7418 |
| 4/24/2019 12:53 | 0.7    | -0.8    | 38.8908 | -0.3417 | 0.5913 | 67.9545 | 2.3547 | -0.7418 |
| 4/24/2019 12:54 | 0.675  | -0.3667 | 38.0875 | -0.05   | 0.5913 | 67.3833 | 2.3665 | -0.7418 |
| 4/24/2019 12:55 | 0.6417 | -0.05   | 37.4708 | -0.1333 | 0.5913 | 66.77   | 2.3507 | -0.7418 |
| 4/24/2019 12:56 | 0.7    | -0.2    | 36.5042 | 0.1417  | 0.5913 | 66.1167 | 2.3372 | -0.7418 |
| 4/24/2019 12:57 | 0.7    | -0.4167 | 35.7008 | 0       | 0.5913 | 65.4909 | 2.3373 | -0.7418 |
| 4/24/2019 12:58 | 0.7    | -0.7    | 35.1117 | 0.4917  | 0.5913 | 64.7    | 2.3035 | -0.7418 |
| 4/24/2019 12:59 | 0.6417 | -0.4833 | 34.58   | -0.0083 | 0.5913 | 63.9727 | 2.3217 | -0.7418 |
| 4/24/2019 13:00 | 0.6083 | -1.0833 | 33.2242 | 0.0667  | 0.5913 | 63.1727 | 2.2857 | -0.7418 |
| 4/24/2019 13:01 | 0.6417 | -0.2667 | 32.8808 | 0.3917  | 0.5913 | 62.38   | 2.2727 | -0.7418 |
| 4/24/2019 13:02 | 0.625  | 0.6     | 32.3317 | 0.7417  | 0.5913 | 61.75   | 2.2777 | -0.7418 |
| 4/24/2019 13:03 | 0.7    | -0.8667 | 31.7567 | 0.7083  | 0.5913 | 61.1333 | 2.2567 | -0.7418 |
| 4/24/2019 13:04 | 0.7    | -0.2333 | 31.2867 | 0.1083  | 0.5913 | 60.3917 | 2.2605 | -0.7418 |
| 4/24/2019 13:05 | 0.7    | -0.2167 | 30.525  | 0.0917  | 0.5913 | 59.65   | 2.2407 | -0.7418 |
| 4/24/2019 13:06 | 0.7    | 0.05    | 30.1658 | -0.225  | 0.5913 | 58.9909 | 2.2355 | -0.7418 |
| 4/24/2019 13:07 | 0.6833 | -0.45   | 29.8567 | 0.3667  | 0.5913 | 58.4    | 2.2333 | -0.7418 |
| 4/24/2019 13:08 | 0.6    | -0.3    | 29.2758 | -0.575  | 0.5913 | 57.88   | 2.21   | -0.7418 |
| 4/24/2019 13:09 | 0.6    | -0.1833 | 28.3717 | -0.0083 | 0.5913 | 57.3455 | 2.2027 | -0.7418 |
| 4/24/2019 13:10 | 0.6    | -0.0333 | 27.9758 | 0.4167  | 0.5913 | 56.8    | 2.1707 | -0.7418 |
| 4/24/2019 13:11 | 0.65   | -1.15   | 27.3117 | 0.7917  | 0.5913 | 56.2455 | 2.1577 | -0.7418 |
| 4/24/2019 13:12 | 0.6833 | -0.15   | 27.0125 | -0.0917 | 0.5913 | 55.7727 | 2.1608 | -0.7418 |
| 4/24/2019 13:13 | 0.7    | -0.8    | 26.5258 | 0.2083  | 0.5913 | 55.275  | 2.1222 | -0.7418 |
| 4/24/2019 13:14 | 0.7    | -0.2833 | 26.025  | 0.2167  | 0.5913 | 54.9083 | 2.1197 | -0.7418 |
| 4/24/2019 13:15 | 0.725  | -0.5667 | 25.3917 | 0.2583  | 0.5913 | 54.3818 | 2.101  | -0.7418 |
| 4/24/2019 13:16 | 0.7583 | -0.6    | 25.2142 | 0.1917  | 0.5913 | 54.02   | 2.0878 | -0.7418 |
| 4/24/2019 13:17 | 0.7    | -0.6667 | 24.84   | -0.0083 | 0.5913 | 53.6273 | 2.0767 | -0.7418 |
| 4/24/2019 13:18 | 0.7    | -0.7    | 24.4633 | -0.5583 | 0.5913 | 53.1727 | 2.054  | -0.7418 |
| 4/24/2019 13:19 | 0.625  | 0.1833  | 24.0817 | -0.2917 | 0.5913 | 52.75   | 2.0527 | -0.7418 |
| 4/24/2019 13:20 | 0.6    | -0.3833 | 23.5667 | 0.175   | 0.5913 | 52.2273 | 2.026  | -0.7418 |
| 4/24/2019 13:21 | 0.6417 | -0.3167 | 23.4883 | 0.2083  | 0.5913 | 51.7417 | 2.0233 | -0.7418 |
| 4/24/2019 13:22 | 0.6    | -0.4667 | 22.7283 | 0.3     | 0.5913 | 51.2    | 2.0097 | -0.7418 |
| 4/24/2019 13:23 | 0.6    | -0.2667 | 22.1833 | -0.1833 | 0.5913 | 50.7455 | 1.9852 | -0.7418 |
| 4/24/2019 13:24 | 0.5167 | 0.2167  | 22.1933 | -0.175  | 0.5913 | 50.2917 | 1.9803 | -0.7418 |
| 4/24/2019 13:25 | 0.5583 | -0.5    | 21.5958 | -0.7    | 0.5913 | 49.8364 | 1.9607 | -0.7418 |
| 4/24/2019 13:26 | 0.5667 | -0.15   | 21.4675 | 0.1     | 0.5913 | 49.3583 | 1.958  | -0.7418 |
| 4/24/2019 13:27 | 0.6    | 0.0333  | 20.9817 | -0.3917 | 0.5913 | 48.95   | 1.9427 | -0.7418 |

|                 |        |         |         |         |        |         |        |         |
|-----------------|--------|---------|---------|---------|--------|---------|--------|---------|
| 4/24/2019 13:28 | 0.6    | -0.5167 | 20.88   | -0.4417 | 0.5913 | 48.5833 | 1.9212 | -0.7418 |
| 4/24/2019 13:29 | 0.625  | -0.05   | 20.5817 | 0.0333  | 0.5913 | 48.1636 | 1.9235 | -0.7418 |
| 4/24/2019 13:30 | 0.6333 | 0.3833  | 20.2742 | -0.3    | 0.5913 | 47.775  | 1.9165 | -0.7418 |
| 4/24/2019 13:31 | 0.6417 | 0.1     | 20.1092 | 0.0083  | 0.5913 | 47.4083 | 1.8867 | -0.7418 |
| 4/24/2019 13:32 | 0.7    | -0.4833 | 19.6217 | -0.1167 | 0.5913 | 46.9917 | 1.8885 | -0.7418 |
| 4/24/2019 13:33 | 0.7    | -0.65   | 18.8717 | 0.1083  | 0.5913 | 46.54   | 1.8503 | -0.7418 |
| 4/24/2019 13:34 | 0.7    | -0.2667 | 19.2033 | 0.1583  | 0.5913 | 46.1583 | 1.847  | -0.7418 |
| 4/24/2019 13:35 | 0.6833 | -0.1333 | 18.9183 | 0.2     | 0.5913 | 45.7455 | 1.838  | -0.7418 |
| 4/24/2019 13:36 | 0.7    | -0.2    | 18.4175 | -0.2667 | 0.5913 | 45.3636 | 1.8103 | -0.7418 |
| 4/24/2019 13:37 | 0.7    | -0.4833 | 18.7183 | -0.4083 | 0.5913 | 44.9167 | 1.8248 | -0.7418 |
| 4/24/2019 13:38 | 0.7    | -0.2    | 17.5325 | -0.4917 | 0.5913 | 44.425  | 1.8008 | -0.7418 |
| 4/24/2019 13:39 | 0.7    | -0.3667 | 17.8558 | 0.25    | 0.5913 | 44.05   | 1.7942 | -0.7418 |
| 4/24/2019 13:40 | 0.7    | -0.9    | 17.725  | -0.375  | 0.5913 | 43.6273 | 1.7885 | -0.7418 |
| 4/24/2019 13:41 | 0.65   | -0.7667 | 17.3733 | 0.25    | 0.5913 | 43.2455 | 1.7622 | -0.7418 |
| 4/24/2019 13:42 | 0.6    | -0.55   | 17.3008 | -0.3333 | 0.5913 | 42.82   | 1.7665 | -0.7418 |
| 4/24/2019 13:43 | 0.6    | -0.65   | 16.6925 | 0.2917  | 0.5913 | 42.5083 | 1.755  | -0.7418 |
| 4/24/2019 13:44 | 0.6167 | -0.1167 | 16.6583 | 0.0083  | 0.5913 | 42.14   | 1.7308 | -0.7418 |
| 4/24/2019 13:45 | 0.6    | -0.55   | 16.245  | -0.5333 | 0.5913 | 41.8273 | 1.7362 | -0.7418 |
| 4/24/2019 13:46 | 0.65   | -0.6667 | 16.055  | -0.6667 | 0.5913 | 41.56   | 1.7215 | -0.7418 |
| 4/24/2019 13:47 | 0.6167 | -0.5333 | 16.0758 | -0.9583 | 0.5913 | 41.2273 | 1.7272 | -0.7418 |
| 4/24/2019 13:48 | 0.6    | -0.4333 | 16.0658 | -0.4417 | 0.5913 | 40.9667 | 1.7185 | -0.7418 |
| 4/24/2019 13:49 | 0.5667 | -0.0167 | 15.765  | -0.0583 | 0.5913 | 40.7083 | 1.6915 | -0.7418 |
| 4/24/2019 13:50 | 0.6    | -0.6    | 14.905  | -0.3083 | 0.5913 | 40.4636 | 1.6942 | -0.7418 |
| 4/24/2019 13:51 | 0.6    | -0.7    | 15.7733 | -0.6667 | 0.5913 | 40.2636 | 1.6682 | -0.7418 |
| 4/24/2019 13:52 | 0.8    | 0.7167  | 13.9408 | 0.925   | 0.5913 | 39.7455 | 1.4815 | -0.7418 |
| 4/24/2019 13:53 | 0.9    | -0.2    | 14.04   | -0.3    | 0.5913 | 39.3    | 1.5858 | -0.7418 |
| 4/24/2019 13:54 |        |         |         |         |        |         | 1.513  | -0.7418 |
| 4/24/2019 13:55 |        |         |         |         |        |         | 1.362  | -0.7418 |
| 4/24/2019 13:56 |        |         |         |         |        |         | 1.2873 | -0.7418 |
| 4/24/2019 13:57 |        |         |         |         |        |         | 1.2625 | -0.7418 |
| 4/24/2019 13:58 |        |         |         |         |        |         | 1.0898 | -0.7418 |
| 4/24/2019 13:59 |        |         |         |         |        |         | 0.9702 | -0.7418 |
| 4/24/2019 14:00 |        |         |         |         |        |         | 0.8568 | -0.7418 |
| 4/24/2019 14:01 |        |         |         |         |        |         | 0.7368 | -0.7418 |
| 4/24/2019 14:02 |        |         |         |         |        |         | 0.7612 | -0.7418 |
| 4/24/2019 14:03 |        |         |         |         |        |         | 0.6922 | -0.7418 |
| 4/24/2019 14:04 |        |         |         |         |        |         | 0.6461 | -0.7418 |
| 4/24/2019 14:05 |        |         |         |         |        |         | 0.6153 | -0.7418 |
| 4/24/2019 14:06 |        |         |         |         |        |         | 0.569  | -0.7418 |
| 4/24/2019 14:07 |        |         |         |         |        |         | 0.5575 | -0.7418 |
| 4/24/2019 14:08 |        |         |         |         |        |         | 0.5551 | -0.7418 |
| 4/24/2019 14:09 |        |         |         |         |        |         | 0.5222 | -0.7418 |
| 4/24/2019 14:10 |        |         |         |         |        |         | 0.486  | -0.7418 |
| 4/24/2019 14:11 |        |         |         |         |        |         | 0.4544 | -0.7418 |
| 4/24/2019 14:12 |        |         |         |         |        |         | 0.4219 | -0.7418 |
| 4/24/2019 14:13 |        |         |         |         |        |         | 0.4072 | -0.7418 |
| 4/24/2019 14:14 |        |         |         |         |        |         | 0.394  | -0.7418 |



|                 |        |         |
|-----------------|--------|---------|
| 4/24/2019 14:15 | 0.3907 | -0.7418 |
| 4/24/2019 14:16 | 0.3581 | -0.7418 |
| 4/24/2019 14:17 | 0.3629 | -0.7418 |
| 4/24/2019 14:18 | 0.3262 | -0.7418 |
| 4/24/2019 14:19 | 0.3079 | -0.7418 |
| 4/24/2019 14:20 | 0.317  | -0.7418 |
| 4/24/2019 14:21 | 0.2961 | -0.7418 |
| 4/24/2019 14:22 | 0.3002 | -0.7418 |
| 4/24/2019 14:23 | 0.2566 | -0.7418 |
| 4/24/2019 14:24 | 0.2627 | -0.7418 |
| 4/24/2019 14:25 | 0.2594 | -0.7418 |
| 4/24/2019 14:26 | 0.2424 | -0.7418 |
| 4/24/2019 14:27 | 0.2385 | -0.7418 |
| 4/24/2019 14:28 | 0.2073 | -0.7418 |
| 4/24/2019 14:29 | 0.2178 | -0.7418 |
| 4/24/2019 14:30 | 0.2144 | -0.7418 |
| 4/24/2019 14:31 | 0.228  | -0.7418 |
| 4/24/2019 14:32 | 0.2437 | -0.7418 |
| 4/24/2019 14:33 | 0.2245 | -0.7418 |
| 4/24/2019 14:34 | 0.234  | -0.7418 |
| 4/24/2019 14:35 | 0.2164 | -0.7418 |
| 4/24/2019 14:36 | 0.2024 | -0.7418 |
| 4/24/2019 14:37 | 0.2078 | -0.7418 |
| 4/24/2019 14:38 | 0.1819 | -0.7418 |
| 4/24/2019 14:39 | 0.2017 | -0.7418 |
| 4/24/2019 14:40 | 0.1871 | -0.7418 |
| 4/24/2019 14:41 | 0.1943 | -0.7418 |
| 4/24/2019 14:42 | 0.1862 | -0.7418 |
| 4/24/2019 14:43 | 0.1808 | -0.7418 |
| 4/24/2019 14:44 | 0.19   | -0.7418 |
| 4/24/2019 14:45 | 0.1633 | -0.7418 |
| 4/24/2019 14:46 | 0.1774 | -0.7418 |
| 4/24/2019 14:47 | 0.1688 | -0.7418 |
| 4/24/2019 14:48 | 0.1605 | -0.7418 |
| 4/24/2019 14:49 | 0.1701 | -0.7418 |
| 4/24/2019 14:50 | 0.1596 | -0.7418 |
| 4/24/2019 14:51 | 0.1696 | -0.7418 |
| 4/24/2019 14:52 | 0.1615 | -0.7418 |
| 4/24/2019 14:53 | 0.1485 | -0.7418 |
| 4/24/2019 14:54 | 0.1638 | -0.7418 |
| 4/24/2019 14:55 | 0.152  | -0.7418 |
| 4/24/2019 14:56 | 0.1615 | -0.7418 |
| 4/24/2019 14:57 | 0.1612 | -0.7418 |
| 4/24/2019 14:58 | 0.1463 | -0.7418 |
| 4/24/2019 14:59 | 0.1555 | -0.7418 |
| 4/24/2019 15:00 | 0.1423 | -0.7418 |
| 4/24/2019 15:01 | 0.1533 | -0.7418 |

|                 |        |         |
|-----------------|--------|---------|
| 4/24/2019 15:02 | 0.1489 | -0.7418 |
| 4/24/2019 15:03 | 0.1439 | -0.7418 |
| 4/24/2019 15:04 | 0.1533 | -0.7418 |
| 4/24/2019 15:05 | 0.1356 | -0.7418 |
| 4/24/2019 15:06 | 0.1527 | -0.7418 |
| 4/24/2019 15:07 | 0.1454 | -0.7418 |
| 4/24/2019 15:08 | 0.1453 | -0.7418 |
| 4/24/2019 15:09 | 0.1547 | -0.7418 |
| 4/24/2019 15:10 | 0.1411 | -0.7418 |
| 4/24/2019 15:11 | 0.151  | -0.7418 |
| 4/24/2019 15:12 | 0.1429 | -0.7418 |
| 4/24/2019 15:13 | 0.1407 | -0.7418 |
| 4/24/2019 15:14 | 0.1469 | -0.7418 |
| 4/24/2019 15:15 | 0.134  | -0.7418 |
| 4/24/2019 15:16 | 0.1489 | -0.7418 |
| 4/24/2019 15:17 | 0.1359 | -0.7418 |
| 4/24/2019 15:18 | 0.1441 | -0.7418 |
| 4/24/2019 15:19 | 0.1482 | -0.7418 |
| 4/24/2019 15:20 | 0.1335 | -0.7418 |
| 4/24/2019 15:21 | 0.1512 | -0.7418 |
| 4/24/2019 15:22 | 0.1336 | -0.7418 |
| 4/24/2019 15:23 | 0.132  | -0.7418 |
| 4/24/2019 15:24 | 0.1389 | -0.7418 |
| 4/24/2019 15:25 | 0.1251 | -0.7418 |
| 4/24/2019 15:26 | 0.1362 | -0.7418 |
| 4/24/2019 15:27 | 0.1354 | -0.7418 |
| 4/24/2019 15:28 | 0.1378 | -0.7418 |
| 4/24/2019 15:29 | 0.1403 | -0.7418 |
| 4/24/2019 15:30 | 0.1325 | -0.7418 |
| 4/24/2019 15:31 | 0.1432 | -0.7418 |
| 4/24/2019 15:32 | 0.1413 | -0.7418 |
| 4/24/2019 15:33 | 0.1398 | -0.7418 |
| 4/24/2019 15:34 | 0.1497 | -0.7418 |
| 4/24/2019 15:35 | 0.1355 | -0.7418 |
| 4/24/2019 15:36 | 0.1467 | -0.7418 |
| 4/24/2019 15:37 | 0.146  | -0.7418 |
| 4/24/2019 15:38 | 0.1357 | -0.7418 |
| 4/24/2019 15:39 | 0.1517 | -0.7418 |
| 4/24/2019 15:40 | 0.1398 | -0.7418 |
| 4/24/2019 15:41 | 0.153  | -0.7418 |
| 4/24/2019 15:42 | 0.1486 | -0.7418 |
| 4/24/2019 15:43 | 0.146  | -0.7418 |
| 4/24/2019 15:44 | 0.1542 | -0.7418 |
| 4/24/2019 15:45 | 0.148  | -0.7418 |
| 4/24/2019 15:46 | 0.1551 | -0.7418 |
| 4/24/2019 15:47 | 0.1606 | -0.7418 |
| 4/24/2019 15:48 | 0.1492 | -0.7418 |

|                 |         |         |         |         |        |        |        |         |
|-----------------|---------|---------|---------|---------|--------|--------|--------|---------|
| 4/24/2019 15:49 |         |         |         |         |        |        | 0.162  | -0.7418 |
| 4/24/2019 15:50 | 11.5429 | 12.2667 | 11.87   | 11.7889 | 0.5913 | 1.15   | 0.1438 | -0.7418 |
| 4/24/2019 15:51 | 11.7083 | 12.6167 | 12.0817 | 12.7    | 0.5913 | 1.26   | 0.15   | -0.7418 |
| 4/24/2019 15:52 | 11.5417 | 13.2    | 12.1308 | 11.35   | 0.5913 | 1.3167 | 0.1548 | -0.7418 |
| 4/24/2019 15:53 | 11.3333 | 11.9167 | 11.4792 | 11.55   | 0.5913 | 1.4    | 0.1447 | -0.7418 |
| 4/24/2019 15:54 | 11.0833 | 11.2167 | 11.8442 | 11.9333 | 0.5913 | 1.5    | 0.1584 | -0.7418 |
| 4/24/2019 15:55 | 10.9167 | 12.4333 | 11.7508 | 11.3583 | 0.5913 | 1.525  | 0.1481 | -0.7418 |
| 4/24/2019 15:56 | 10.825  | 11.3167 | 11.5633 | 11.8    | 0.5913 | 1.6    | 0.1567 | -0.7418 |
| 4/24/2019 15:57 | 10.6333 | 10.9167 | 11.0833 | 11.3583 | 0.5913 | 1.6    | 0.1587 | -0.7418 |
| 4/24/2019 15:58 | 10.35   | 10.2667 | 10.9975 | 10.4667 | 0.5913 | 1.6    | 0.1516 | -0.7418 |
| 4/24/2019 15:59 | 10.175  | 10.5333 | 11.0425 | 11.1917 | 0.5913 | 1.6    | 0.1666 | -0.7418 |
| 4/24/2019 16:00 | 10.0667 | 10.8333 | 10.4602 | 10.55   | 0.5913 | 1.6    | 0.1488 | -0.7418 |
| 4/24/2019 16:01 | 9.9583  | 11.0167 | 10.3433 | 10.7417 | 0.5913 | 1.6    | 0.152  | -0.7418 |
| 4/24/2019 16:02 | 9.7583  | 10.8333 | 10.325  | 9.9333  | 0.5913 | 1.6    | 0.1567 | -0.7418 |
| 4/24/2019 16:03 | 9.6083  | 10.05   | 10.4975 | 10.375  | 0.5913 | 1.6    | 0.1469 | -0.7418 |
| 4/24/2019 16:04 | 9.4     | 10.0167 | 10.0466 | 10.15   | 0.5913 | 1.6    | 0.1633 | -0.7418 |
| 4/24/2019 16:05 | 9.1667  | 9.5167  | 9.7276  | 9.775   | 0.5913 | 1.6    | 0.1493 | -0.7418 |
| 4/24/2019 16:06 | 8.925   | 9.4167  | 9.6788  | 9.4833  | 0.5913 | 1.6    | 0.1596 | -0.7418 |
| 4/24/2019 16:07 | 8.8     | 9.7333  | 9.5586  | 9.4333  | 0.5913 | 1.6    | 0.156  | -0.7418 |
| 4/24/2019 16:08 | 8.7667  | 9.6333  | 8.9139  | 9.4583  | 0.5913 | 1.6    | 0.1424 | -0.7418 |
| 4/24/2019 16:09 | 8.625   | 8.7667  | 9.0023  | 9.7     | 0.5913 | 1.63   | 0.1634 | -0.7418 |
| 4/24/2019 16:10 | 8.4167  | 8.0167  | 9.1907  | 8.8333  | 0.5913 | 1.7    | 0.1439 | -0.7418 |
| 4/24/2019 16:11 | 8.15    | 8.7333  | 8.7579  | 9       | 0.5913 | 1.7    | 0.1574 | -0.7418 |
| 4/24/2019 16:12 | 8.0417  | 8.5833  | 8.8381  | 8.6167  | 0.5913 | 1.7    | 0.1496 | -0.7418 |
| 4/24/2019 16:13 | 7.925   | 8.1667  | 8.6068  | 8.1167  | 0.5913 | 1.7    | 0.1478 | -0.7418 |
| 4/24/2019 16:14 | 7.8167  | 8       | 8.4113  | 7.7833  | 0.5913 | 1.7636 | 0.1606 | -0.7418 |
| 4/24/2019 16:15 | 7.6583  | 7.7     | 8.5392  | 7.475   | 0.5913 | 1.8    | 0.1414 | -0.7418 |
| 4/24/2019 16:16 | 7.5083  | 6.9833  | 8.2775  | 7.6917  | 0.5913 | 1.8    | 0.1545 | -0.7418 |
| 4/24/2019 16:17 | 7.3083  | 7.3167  | 8.0333  | 8.0083  | 0.5913 | 1.83   | 0.1473 | -0.7418 |
| 4/24/2019 16:18 | 7.1917  | 7.4167  | 8.0419  | 7.825   | 0.5913 | 1.9    | 0.1513 | -0.7418 |
| 4/24/2019 16:19 | 7.1     | 7.4     | 8.0047  | 6.7     | 0.5913 | 1.9    | 0.1589 | -0.7418 |
| 4/24/2019 16:20 | 7.0833  | 7.7167  | 7.6829  | 7.425   | 0.5913 | 1.9    | 0.1431 | -0.7418 |
| 4/24/2019 16:21 | 6.9583  | 7.5     | 7.9605  | 7.2833  | 0.5913 | 1.9    | 0.1565 | -0.7418 |
| 4/24/2019 16:22 | 6.7917  | 7.0333  | 7.57    | 7.075   | 0.5913 | 1.9    | 0.1437 | -0.7418 |
| 4/24/2019 16:23 | 6.7     | 7.65    | 7.2601  | 7.1583  | 0.5913 | 1.9    | 0.1558 | -0.7418 |
| 4/24/2019 16:24 | 6.625   | 6.6833  | 7.5362  | 7.35    | 0.5913 | 1.9    | 0.1673 | -0.7418 |
| 4/24/2019 16:25 | 6.5417  | 6.8333  | 6.919   | 6.5083  | 0.5913 | 1.9    | 0.1462 | -0.7418 |
| 4/24/2019 16:26 | 6.4     | 6.4333  | 7.2062  | 6.825   | 0.5913 | 1.9    | 0.1594 | -0.7418 |
| 4/24/2019 16:27 | 6.3     | 6.7833  | 7.2664  | 6.9417  | 0.5913 | 1.9    | 0.1591 | -0.7418 |
| 4/24/2019 16:28 | 6.2     | 7.0167  | 7.1834  | 6.7667  | 0.5913 | 1.9    | 0.1471 | -0.7418 |
| 4/24/2019 16:29 | 6.125   | 6.5     | 7.0617  | 6.4     | 0.5913 | 1.9    | 0.1569 | -0.7418 |
| 4/24/2019 16:30 | 6.0833  | 6.6333  | 6.9708  | 6.8083  | 0.5913 | 1.82   | 0.1519 | -0.7418 |
| 4/24/2019 16:31 | 5.9667  | 6.4167  | 6.6598  | 6.425   | 0.5913 | 1.8909 | 0.1576 | -0.7418 |
| 4/24/2019 16:32 | 5.8417  | 6.1833  | 6.686   | 6.3167  | 0.5913 | 1.9    | 0.1546 | -0.7418 |
| 4/24/2019 16:33 | 5.8     | 6.2667  | 6.686   | 6.2583  | 0.5913 | 1.8417 | 0.1498 | -0.7418 |
| 4/24/2019 16:34 | 5.7167  | 5.65    | 6.6221  | 6.15    | 0.5913 | 1.8    | 0.1634 | -0.7418 |
| 4/24/2019 16:35 | 5.5833  | 6.2833  | 6.2054  | 6.2833  | 0.5913 | 1.8455 | 0.1447 | -0.7418 |

|                 |        |        |        |        |        |        |        |         |
|-----------------|--------|--------|--------|--------|--------|--------|--------|---------|
| 4/24/2019 16:36 | 5.4583 | 5.8833 | 6.5319 | 6.1833 | 0.5913 | 1.9    | 0.1614 | -0.7418 |
| 4/24/2019 16:37 | 5.3417 | 5.7667 | 6.2075 | 6.2917 | 0.5913 | 1.9    | 0.1568 | -0.7418 |
| 4/24/2019 16:38 | 5.3833 | 5.6333 | 5.9618 | 4.8583 | 0.5913 | 1.9    | 0.1382 | -0.7418 |
| 4/24/2019 16:39 | 5.3    | 6      | 6.4848 | 6.1167 | 0.5913 | 1.9    | 0.1563 | -0.7418 |
| 4/24/2019 16:40 | 5.2667 | 5.2167 | 5.6253 | 5.35   | 0.5913 | 1.9    | 0.1505 | -0.7418 |
| 4/24/2019 16:41 | 5.1    | 4.4333 | 5.5493 | 5.425  | 0.5913 | 1.9    | 0.1608 | -0.7418 |
| 4/24/2019 16:42 | 5.0083 | 4.75   | 5.7195 | 5.2083 | 0.5913 | 1.875  | 0.1584 | -0.7418 |
| 4/24/2019 16:43 | 4.925  | 4.7833 | 5.6677 | 5.6583 | 0.5913 | 1.84   | 0.1474 | -0.7418 |
| 4/24/2019 16:44 | 4.9    | 4.6    | 5.8282 | 5.55   | 0.5913 | 1.8    | 0.1648 | -0.7418 |
| 4/24/2019 16:45 | 4.9    | 4.7333 | 5.9027 | 4.7833 | 0.5913 | 1.8    | 0.1509 | -0.7418 |
| 4/24/2019 16:46 | 4.8833 | 4.8667 | 5.8498 | 4.3833 | 0.5913 | 1.85   | 0.1542 | -0.7418 |
| 4/24/2019 16:47 | 4.8083 | 5.8167 | 5.1931 | 4.5    | 0.5913 | 1.8    | 0.1651 | -0.7418 |
| 4/24/2019 16:48 | 4.7583 | 4.8167 | 5.4912 | 4.575  | 0.5913 | 1.8    | 0.1488 | -0.7418 |
| 4/24/2019 16:49 | 4.7    | 4.6833 | 5.4065 | 4.4333 | 0.5913 | 1.8    | 0.1576 | -0.7418 |
| 4/24/2019 16:50 | 4.5917 | 4.2833 | 5.4559 | 4.6083 | 0.5913 | 1.85   | 0.1553 | -0.7418 |
| 4/24/2019 16:51 | 4.5    | 3.95   | 5.1143 | 4.5083 | 0.5913 | 1.9    | 0.1543 | -0.7418 |
| 4/24/2019 16:52 | 4.4083 | 4.6    | 5.2786 | 4.725  | 0.5913 | 1.9    | 0.1615 | -0.7418 |
| 4/24/2019 16:53 | 4.4    | 4.6167 | 5.1293 | 4.775  | 0.5913 | 1.9273 | 0.1483 | -0.7418 |
| 4/24/2019 16:54 | 4.325  | 4.4    | 5.2604 | 4.0167 | 0.5913 | 2      | 0.1594 | -0.7418 |
| 4/24/2019 16:55 | 4.2583 | 4.45   | 5.3033 | 3.7583 | 0.5913 | 1.9364 | 0.1584 | -0.7418 |
| 4/24/2019 16:56 | 4.1667 | 4.1    | 5.0043 | 4.4583 | 0.5913 | 1.9778 | 0.1496 | -0.7418 |
| 4/24/2019 16:57 | 4.1    | 4.3    | 5.0546 | 4.1667 | 0.5913 | 2      | 0.1593 | -0.7418 |
| 4/24/2019 16:58 | 4.0667 | 3.85   | 4.8503 | 4.975  | 0.5913 | 2      | 0.1524 | -0.7418 |
| 4/24/2019 16:59 | 4.0917 | 4.05   | 4.9075 | 4.5417 | 0.5913 | 2      | 0.1432 | -0.7418 |
| 4/24/2019 17:00 | 4      | 4.3333 | 4.812  | 3.5083 | 0.5913 | 2      | 0.1567 | -0.7418 |
| 4/24/2019 17:01 | 3.925  | 4.1    | 4.5343 | 4.2333 | 0.5913 | 2      | 0.1399 | -0.7418 |
| 4/24/2019 17:02 | 3.8    | 4.1333 | 4.4095 | 4.225  | 0.5913 | 2      | 0.1632 | -0.7418 |
| 4/24/2019 17:03 | 3.8    | 4.0167 | 4.6235 | 4.325  | 0.5913 | 2      | 0.153  | -0.7418 |
| 4/24/2019 17:04 | 3.7333 | 3.8667 | 4.6663 | 3.8833 | 0.5913 | 2      | 0.1563 | -0.7418 |
| 4/24/2019 17:05 | 3.6833 | 4.4333 | 4.491  | 4.0417 | 0.5913 | 2      | 0.1607 | -0.7418 |
| 4/24/2019 17:06 | 3.675  | 3.3333 | 4.4945 | 4.075  | 0.5913 | 2      | 0.1457 | -0.7418 |
| 4/24/2019 17:07 | 3.6    | 3.7333 | 4.5293 | 3.775  | 0.5913 | 2      | 0.1557 | -0.7418 |
| 4/24/2019 17:08 | 3.6    | 3.5167 | 4.53   | 3.6917 | 0.5913 | 2      | 0.1595 | -0.7418 |
| 4/24/2019 17:09 | 3.4417 | 4.0167 | 4.3313 | 3.4417 | 0.5913 | 2      | 0.1506 | -0.7418 |
| 4/24/2019 17:10 | 3.4    | 3.6667 | 4.4532 | 3.5917 | 0.5913 | 2.0778 | 0.1611 | -0.7418 |
| 4/24/2019 17:11 | 3.35   | 3.95   | 4.1788 | 3.325  | 0.5913 | 2.1    | 0.147  | -0.7418 |
| 4/24/2019 17:12 | 3.3333 | 3.6167 | 4.4533 | 3.0333 | 0.5913 | 2.1    | 0.146  | -0.7418 |
| 4/24/2019 17:13 | 3.3    | 3.9167 | 4.216  | 3.0167 | 0.5913 | 2.1    | 0.1547 | -0.7418 |
| 4/24/2019 17:14 | 3.3    | 3.75   | 4.0205 | 3.775  | 0.5913 | 2.0364 | 0.1438 | -0.7418 |
| 4/24/2019 17:15 | 3.3    | 3.4167 | 4.2805 | 3.3917 | 0.5913 | 2.0727 | 0.158  | -0.7418 |
| 4/24/2019 17:16 | 3.2667 | 2.8833 | 3.9515 | 3.4167 | 0.5913 | 2.1    | 0.1495 | -0.7418 |
| 4/24/2019 17:17 | 3.1833 | 2.8833 | 4.1253 | 3.2667 | 0.5913 | 2.1    | 0.1479 | -0.7418 |
| 4/24/2019 17:18 | 3.0917 | 2.5167 | 4.2003 | 3.2917 | 0.5913 | 2.1    | 0.1624 | -0.7418 |
| 4/24/2019 17:19 | 3.075  | 3.4333 | 3.9095 | 3.225  | 0.5913 | 2.1    | 0.1441 | -0.7418 |
| 4/24/2019 17:20 | 3.1167 | 3.1333 | 3.8897 | 2.65   | 0.5913 | 2.1    | 0.1566 | -0.7418 |
| 4/24/2019 17:21 | 3.1583 | 3.05   | 4.0433 | 3.1083 | 0.5913 | 2.1    | 0.1519 | -0.7418 |
| 4/24/2019 17:22 | 3.1167 | 2.7333 | 4.0278 | 3.4083 | 0.5913 | 2.1    | 0.1457 | -0.7418 |

|                 |        |        |        |        |        |        |        |         |
|-----------------|--------|--------|--------|--------|--------|--------|--------|---------|
| 4/24/2019 17:23 | 3.0833 | 3.5    | 4.168  | 2.65   | 0.5913 | 2.1    | 0.1573 | -0.7418 |
| 4/24/2019 17:24 | 2.9917 | 3.1333 | 3.8135 | 2.675  | 0.5913 | 2.1    | 0.1429 | -0.7418 |
| 4/24/2019 17:25 | 2.9167 | 3.1333 | 4.0987 | 3.15   | 0.5913 | 2.1    | 0.1527 | -0.7418 |
| 4/24/2019 17:26 | 2.95   | 2.7167 | 4.0393 | 3.4    | 0.5913 | 2.1091 | 0.1514 | -0.7418 |
| 4/24/2019 17:27 | 3      | 2.8833 | 3.6542 | 2.8917 | 0.5913 | 2.2    | 0.1447 | -0.7418 |
| 4/24/2019 17:28 | 3      | 2.8667 | 3.6157 | 3.1417 | 0.5913 | 2.28   | 0.1594 | -0.7418 |
| 4/24/2019 17:29 | 2.9417 | 3      | 4.0263 | 3.075  | 0.5913 | 2.475  | 0.144  | -0.7418 |
| 4/24/2019 17:30 | 2.9    | 2.9667 | 4.3518 | 2.725  | 0.5913 | 2.5    | 0.1617 | -0.7418 |
| 4/24/2019 17:31 | 2.9    | 2.7333 | 3.8762 | 2.9583 | 0.5913 | 2.5    | 0.1534 | -0.7418 |
| 4/24/2019 17:32 | 2.9    | 3.2667 | 3.8845 | 3.0917 | 0.5913 | 2.62   | 0.1522 | -0.7418 |
| 4/24/2019 17:33 | 2.9417 | 2.4167 | 3.6157 | 2.725  | 0.5913 | 2.7    | 0.1578 | -0.7418 |
| 4/24/2019 17:34 | 2.925  | 2.5333 | 3.8458 | 2.575  | 0.5913 | 2.7    | 0.1426 | -0.7418 |
| 4/24/2019 17:35 | 2.9    | 3.0667 | 3.9263 | 2.1167 | 0.5913 | 2.7    | 0.1516 | -0.7418 |
| 4/24/2019 17:36 | 2.9    | 2.45   | 3.8262 | 2.825  | 0.5913 | 2.7    | 0.1574 | -0.7418 |
| 4/24/2019 17:37 | 2.9    | 3.4    | 3.145  | 2.725  | 0.5913 | 2.7    | 0.1497 | -0.7418 |
| 4/24/2019 17:38 | 2.825  | 2.6833 | 3.523  | 2.2667 | 0.5913 | 2.7    | 0.1565 | -0.7418 |
| 4/24/2019 17:39 | 2.6833 | 1.9667 | 3.555  | 1.875  | 0.5913 | 2.7    | 0.1447 | -0.7418 |
| 4/24/2019 17:40 | 2.6    | 2.25   | 3.4685 | 2.7417 | 0.5913 | 2.88   | 0.1562 | -0.7418 |
| 4/24/2019 17:41 | 2.6    | 2.2667 | 3.3002 | 2.5    | 0.5913 | 2.8    | 0.1496 | -0.7418 |
| 4/24/2019 17:42 | 2.6    | 2.4333 | 3.4482 | 2.2083 | 0.5913 | 3.1    | 0.143  | -0.7418 |
| 4/24/2019 17:43 | 2.6    | 2.6333 | 3.764  | 2.975  | 0.5913 | 3.4    | 0.1589 | -0.7418 |
| 4/24/2019 17:44 | 2.6083 | 2.3333 | 3.5027 | 2.3667 | 0.5913 | 3.325  | 0.1451 | -0.7418 |
| 4/24/2019 17:45 | 2.6    | 2.4    | 3.6097 | 2.5333 | 0.5913 | 3.2222 | 0.1479 | -0.7418 |
| 4/24/2019 17:46 | 2.5917 | 2.1833 | 3.286  | 2.3833 | 0.5913 | 3.3167 | 0.1488 | -0.7418 |
| 4/24/2019 17:47 | 2.5083 | 3.1333 | 3.4307 | 2.4583 | 0.5913 | 3.4583 | 0.1409 | -0.7418 |
| 4/24/2019 17:48 | 2.5167 | 2.4667 | 3.4122 | 2.4083 | 0.5913 | 3.575  | 0.151  | -0.7418 |
| 4/24/2019 17:49 | 2.575  | 2.6833 | 3.2577 | 2.3083 | 0.5913 | 3.5182 | 0.1501 | -0.7418 |
| 4/24/2019 17:50 | 2.5667 | 2.7833 | 3.3242 | 2.2083 | 0.5913 | 3.5    | 0.1403 | -0.7418 |
| 4/24/2019 17:51 | 2.5167 | 2.8167 | 3.1293 | 2.3833 | 0.5913 | 3.5    | 0.1527 | -0.7418 |
| 4/24/2019 17:52 | 2.5083 | 1.4667 | 3.0512 | 1.5333 | 0.5913 | 3.4727 | 0.1443 | -0.7418 |
| 4/24/2019 17:53 | 2.5    | 2.3167 | 3.354  | 2.2083 | 0.5913 | 3.4364 | 0.155  | -0.7418 |
| 4/24/2019 17:54 | 2.5    | 2.3833 | 3.567  | 2.2417 | 0.5913 | 3.3727 | 0.1575 | -0.7418 |
| 4/24/2019 17:55 | 2.5    | 2.1    | 3.4682 | 2.55   | 0.5913 | 2.9273 | 0.1457 | -0.7418 |
| 4/24/2019 17:56 | 2.5083 | 2.8667 | 3.2792 | 2.525  | 0.5913 | 3      | 0.1521 | -0.7418 |
| 4/24/2019 17:57 | 2.475  | 1.4    | 3.1295 | 1.95   | 0.5913 | 2.9636 | 0.1453 | -0.7418 |
| 4/24/2019 17:58 | 2.4167 | 1.85   | 3.1317 | 2.4833 | 0.5913 | 2.9    | 0.1421 | -0.7418 |
| 4/24/2019 17:59 | 2.3917 | 2.2667 | 3.4683 | 1.675  | 0.5913 | 2.7909 | 0.1517 | -0.7418 |
| 4/24/2019 18:00 | 2.3917 | 1.7833 | 3.2258 | 1.8583 | 0.5913 | 2.7    | 0.1409 | -0.7418 |
| 4/24/2019 18:01 | 2.4    | 1.7333 | 3.3633 | 2.325  | 0.5913 | 2.73   | 0.1569 | -0.7418 |
| 4/24/2019 18:02 | 2.4667 | 2.1    | 3.1938 | 1.625  | 0.5913 | 3.0364 | 0.1499 | -0.7418 |
| 4/24/2019 18:03 | 2.4667 | 1.3667 | 2.9787 | 2.0667 | 0.5913 | 3.18   | 0.1484 | -0.7418 |
| 4/24/2019 18:04 | 2.375  | 2.6667 | 3.27   | 1.9083 | 0.5913 | 3.31   | 0.1518 | -0.7418 |
| 4/24/2019 18:05 | 2.3    | 1.8    | 2.852  | 1.75   | 0.5913 | 3.17   | 0.1374 | -0.7418 |
| 4/24/2019 18:06 | 2.225  | 2.3833 | 3.0105 | 2.1083 | 0.5913 | 3.1182 | 0.1437 | -0.7418 |
| 4/24/2019 18:07 | 2.2083 | 2.2167 | 3.2458 | 1.9    | 0.5913 | 3.1455 | 0.1502 | -0.7418 |
| 4/24/2019 18:08 | 2.2    | 1.4667 | 3.0933 | 1.6083 | 0.5913 | 3.3    | 0.1415 | -0.7418 |
| 4/24/2019 18:09 | 2.175  | 2.2167 | 2.9412 | 2.2167 | 0.5913 | 3.3    | 0.154  | -0.7418 |

|                 |        |        |        |        |        |        |        |         |
|-----------------|--------|--------|--------|--------|--------|--------|--------|---------|
| 4/24/2019 18:10 | 2.1    | 1.8    | 2.6818 | 1.9583 | 0.5913 | 3.3    | 0.1468 | -0.7418 |
| 4/24/2019 18:11 | 2.1    | 2.15   | 2.729  | 2.425  | 0.5913 | 3.3    | 0.1499 | -0.7418 |
| 4/24/2019 18:12 | 2.1    | 1.0167 | 2.9668 | 1.7333 | 0.5913 | 3.3364 | 0.1595 | -0.7418 |
| 4/24/2019 18:13 | 2.0833 | 1.75   | 3.4067 | 2.0167 | 0.5913 | 3.6636 | 0.1393 | -0.7418 |
| 4/24/2019 18:14 | 2      | 1.6667 | 3.0918 | 1.6333 | 0.5913 | 3.725  | 0.1521 | -0.7418 |
| 4/24/2019 18:15 | 2      | 1.7    | 3.4025 | 2.1917 | 0.5913 | 3.6273 | 0.1435 | -0.7418 |
| 4/24/2019 18:16 | 2      | 1.65   | 3.0692 | 1.6167 | 0.5913 | 3.875  | 0.146  | -0.7418 |
| 4/24/2019 18:17 | 2.0417 | 2.0333 | 3.0222 | 2.1917 | 0.5913 | 3.9545 | 0.1504 | -0.7418 |
| 4/24/2019 18:18 | 2.0833 | 2.0333 | 3.2738 | 1.85   | 0.5913 | 4.0667 | 0.1463 | -0.7418 |
| 4/24/2019 18:19 | 2.05   | 1.75   | 2.9462 | 2.0583 | 0.5913 | 4.08   | 0.147  | -0.7418 |
| 4/24/2019 18:20 | 2      | 1      | 2.996  | 2.025  | 0.5913 | 3.8917 | 0.1519 | -0.7418 |
| 4/24/2019 18:21 | 1.975  | 2.1667 | 2.8773 | 1.7917 | 0.5913 | 3.9    | 0.1408 | -0.7418 |
| 4/24/2019 18:22 | 1.9167 | 2.15   | 2.6812 | 1.675  | 0.5913 | 3.9    | 0.149  | -0.7418 |
| 4/24/2019 18:23 | 1.9    | 1.3    | 2.63   | 1.725  | 0.5913 | 3.9364 | 0.1508 | -0.7418 |
| 4/24/2019 18:24 | 1.9182 | 1.1667 | 2.9897 | 1.8417 | 0.5913 | 4.1    | 0.1496 | -0.7418 |
| 4/24/2019 18:25 | 1.9    | 1.55   | 2.7638 | 1.6833 | 0.5913 | 4.0455 | 0.1541 | -0.7418 |
| 4/24/2019 18:26 | 1.9    | 1.8    | 3.145  | 1.675  | 0.5913 | 4.0182 | 0.1359 | -0.7418 |
| 4/24/2019 18:27 | 1.9    | 2.0167 | 2.8185 | 1.7667 | 0.5913 | 4.1727 | 0.1559 | -0.7418 |
| 4/24/2019 18:28 | 1.9    | 1.2833 | 3.5568 | 1.5667 | 0.5913 | 4.0091 | 0.1357 | -0.7418 |
| 4/24/2019 18:29 | 1.925  | 2.4167 | 2.9445 | 1.9583 | 0.5913 | 3.7818 | 0.1406 | -0.7418 |
| 4/24/2019 18:30 | 1.975  | 1.9167 | 3.1857 | 1.5583 | 0.5913 | 3.725  | 0.1475 | -0.7418 |
| 4/24/2019 18:31 | 2      | 2.45   | 3.165  | 1.8083 | 0.5913 | 3.8    | 0.1425 | -0.7418 |
| 4/24/2019 18:32 | 1.9417 | 1.4333 | 2.9508 | 1.7417 | 0.5913 | 3.8    | 0.1587 | -0.7418 |
| 4/24/2019 18:33 | 1.975  | 1.4167 | 3.1587 | 1.3667 | 0.5913 | 3.8    | 0.1352 | -0.7418 |
| 4/24/2019 18:34 | 1.95   | 1.95   | 3.1398 | 1.5917 | 0.5913 | 3.8    | 0.144  | -0.7418 |
| 4/24/2019 18:35 | 2.0583 | 0.8833 | 3.1478 | 1.9083 | 0.5913 | 3.75   | 0.1451 | -0.7418 |
| 4/24/2019 18:36 | 2.075  | 1.9667 | 3.1896 | 1.5167 | 0.5913 | 3.52   | 0.1379 | -0.7418 |
| 4/24/2019 18:37 | 2.1    | 1.7333 | 2.9453 | 1.1333 | 0.5913 | 3.4    | 0.1503 | -0.7418 |
| 4/24/2019 18:38 | 2      | 1.2667 | 2.9585 | 1.8333 | 0.5913 | 3.03   | 0.1411 | -0.7418 |
| 4/24/2019 18:39 | 2      | 2.3333 | 3.0182 | 2.1833 | 0.5913 | 2.82   | 0.1372 | -0.7418 |
| 4/24/2019 18:40 | 2      | 1.7333 | 3.062  | 1.55   | 0.5913 | 2.63   | 0.1422 | -0.7418 |
| 4/24/2019 18:41 | 1.9545 | 1.1    | 2.8301 | 1.75   | 0.5913 | 2.6    | 0.1349 | -0.7418 |
| 4/24/2019 18:42 | 1.8917 | 1.6    | 2.6328 | 1.7333 | 0.5913 | 2.4909 | 0.1467 | -0.7418 |
| 4/24/2019 18:43 | 1.8667 | 1.7667 | 2.8458 | 1.075  | 0.5913 | 2.64   | 0.1437 | -0.7418 |
| 4/24/2019 18:44 | 1.9    | 1.9667 | 3.1444 | 1.3667 | 0.5913 | 3.1636 | 0.1398 | -0.7418 |
| 4/24/2019 18:45 | 2.0167 | 1.6333 | 3.0163 | 1.4417 | 0.5913 | 3.6455 | 0.1528 | -0.7418 |
| 4/24/2019 18:46 | 2.1    | 1.2    | 2.8781 | 1.5    | 0.5913 | 3.8    | 0.1359 | -0.7418 |
| 4/24/2019 18:47 | 2.0583 | 1.0833 | 2.9303 | 1.275  | 0.5913 | 3.8    | 0.1543 | -0.7418 |
| 4/24/2019 18:48 | 1.9833 | 1.8167 | 2.5618 | 1.2833 | 0.5913 | 3.8    | 0.1481 | -0.7418 |
| 4/24/2019 18:49 | 1.8917 | 0.95   | 2.7277 | 1.6833 | 0.5913 | 3.8    | 0.1394 | -0.7418 |
| 4/24/2019 18:50 | 1.8    | 1.3    | 3.0025 | 1.025  | 0.5913 | 3.8    | 0.1523 | -0.7418 |
| 4/24/2019 18:51 | 1.8    | 1.5667 | 2.4198 | 1.1917 | 0.5913 | 3.8    | 0.1374 | -0.7418 |
| 4/24/2019 18:52 | 1.8167 | 1.2167 | 2.9503 | 1.675  | 0.5913 | 3.8    | 0.156  | -0.7418 |
| 4/24/2019 18:53 | 1.825  | 1.6833 | 2.768  | 1.2917 | 0.5913 | 3.8    | 0.1496 | -0.7418 |
| 4/24/2019 18:54 | 1.8    | 1.7333 | 2.4092 | 0.925  | 0.5913 | 3.8    | 0.147  | -0.7418 |
| 4/24/2019 18:55 | 1.7167 | 1.85   | 2.8362 | 1.4167 | 0.5913 | 3.54   | 0.1571 | -0.7418 |
| 4/24/2019 18:56 | 1.7917 | 1.9    | 2.8865 | 1.7667 | 0.5913 | 3.1182 | 0.142  | -0.7418 |

|                 |        |        |        |        |        |        |        |         |
|-----------------|--------|--------|--------|--------|--------|--------|--------|---------|
| 4/24/2019 18:57 | 1.8083 | 2.35   | 3.1033 | 1.9917 | 0.5913 | 2.5091 | 0.1534 | -0.7418 |
| 4/24/2019 18:58 | 1.8    | 2.1333 | 2.8603 | 1.425  | 0.5913 | 2.3182 | 0.1509 | -0.7418 |
| 4/24/2019 18:59 | 1.8    | 1.2    | 3.1648 | 1.525  | 0.5913 | 2.3    | 0.1442 | -0.7418 |
| 4/24/2019 19:00 | 1.6667 | 1.2333 | 2.5283 | 1.7417 | 0.5913 | 2.3    | 0.1586 | -0.7418 |
| 4/24/2019 19:01 | 1.55   | 1.6333 | 2.4668 | 1.275  | 0.5913 | 2.3455 | 0.1498 | -0.7418 |
| 4/24/2019 19:02 | 1.3833 | 1.2167 | 2.6848 | 1.9667 | 0.5913 | 2.52   | 0.1571 | -0.7418 |
| 4/24/2019 19:03 | 1.3    | 1.3333 | 2.5778 | 1.2    | 0.5913 | 2.6364 | 0.1548 | -0.7418 |
| 4/24/2019 19:04 | 1.3    | 0.7833 | 2.7154 | 1.325  | 0.5913 | 2.6727 | 0.1456 | -0.7418 |
| 4/24/2019 19:05 | 1.3833 | 0.5667 | 2.6462 | 1.2667 | 0.5913 | 2.7    | 0.1606 | -0.7418 |
| 4/24/2019 19:06 | 1.45   | 0.95   | 2.6355 | 1.4667 | 0.5913 | 2.7    | 0.1523 | -0.7418 |
| 4/24/2019 19:07 | 1.4667 | 1.4833 | 2.6833 | 1.825  | 0.5913 | 2.7    | 0.1609 | -0.7418 |
| 4/24/2019 19:08 | 1.3917 | 1.4167 | 2.5389 | 0.7833 | 0.5913 | 2.7    | 0.1512 | -0.7418 |
| 4/24/2019 19:09 | 1.3    | 1.55   | 2.5819 | 1.45   | 0.5913 | 2.7    | 0.1494 | -0.7418 |
| 4/24/2019 19:10 | 1.3    | 0.8333 | 2.3135 | 0.4417 | 0.5913 | 2.8    | 0.163  | -0.7418 |
| 4/24/2019 19:11 | 1.2917 | 1.2    | 2.7681 | 1.6    | 0.5913 | 3.1    | 0.1409 | -0.7418 |
| 4/24/2019 19:12 | 1.225  | 1.85   | 2.7005 | 1.3167 | 0.5913 | 3.2818 | 0.1656 | -0.7418 |
| 4/24/2019 19:13 | 1.2    | 1      | 2.3129 | 1.3833 | 0.5913 | 3.3    | 0.1533 | -0.7418 |
| 4/24/2019 19:14 | 1.1    | 0.8    | 2.3687 | 1.125  | 0.5913 | 3.08   | 0.1526 | -0.7418 |
| 4/24/2019 19:15 | 1.1333 | 1.3    | 2.762  | 1.2333 | 0.5913 | 2.9167 | 0.1582 | -0.7418 |
| 4/24/2019 19:16 | 1.2    | 0.8167 | 2.5133 | 1.325  | 0.5913 | 2.9    | 0.1524 | -0.7418 |
| 4/24/2019 19:17 | 1.2917 | 1.4333 | 2.5969 | 1.3333 | 0.5913 | 2.9    | 0.148  | -0.7418 |
| 4/24/2019 19:18 | 1.3    | 1.2    | 2.5202 | 1.5167 | 0.5913 | 2.9    | 0.1561 | -0.7418 |
| 4/24/2019 19:19 | 1.275  | 0.8    | 2.2943 | 0.975  | 0.5913 | 2.9    | 0.1415 | -0.7418 |
| 4/24/2019 19:20 | 1.2    | 1.8    | 2.3713 | 1.025  | 0.5913 | 2.9    | 0.1599 | -0.7418 |
| 4/24/2019 19:21 | 1.225  | 1.5833 | 2.5128 | 1.3417 | 0.5913 | 2.9    | 0.1527 | -0.7418 |
| 4/24/2019 19:22 | 1.3    | 0.4833 | 2.3675 | 1.1833 | 0.5913 | 2.8727 | 0.1528 | -0.7418 |
| 4/24/2019 19:23 | 1.275  | 0.9333 | 2.6725 | 0.8333 | 0.5913 | 2.5545 | 0.1521 | -0.7418 |
| 4/24/2019 19:24 | 1.2    | 1      | 2.4623 | 1.3667 | 0.5913 | 2.4    | 0.1454 | -0.7418 |
| 4/24/2019 19:25 | 1.2    | 1.4167 | 2.409  | 1.4833 | 0.5913 | 2.4556 | 0.1656 | -0.7418 |
| 4/24/2019 19:26 | 1.2083 | 1.0167 | 2.7308 | 1.7667 | 0.5913 | 2.5    | 0.1439 | -0.7418 |
| 4/24/2019 19:27 | 1.2667 | -0.1   | 2.6446 | 1.725  | 0.5913 | 2.5909 | 0.1484 | -0.7418 |
| 4/24/2019 19:28 | 1.3    | 0.95   | 2.4372 | 1.1667 | 0.5913 | 2.6    | 0.1558 | -0.7418 |
| 4/24/2019 19:29 | 1.3    | 1.1167 | 2.2383 | 1.3667 | 0.5913 | 2.6    | 0.1435 | -0.7418 |
| 4/24/2019 19:30 | 1.25   | 0.9333 | 2.5176 | 1.4833 | 0.5913 | 2.6    | 0.1561 | -0.7418 |
| 4/24/2019 19:31 | 1.2    | 1.4167 | 2.277  | 0.9333 | 0.5913 | 2.6    | 0.1444 | -0.7418 |
| 4/24/2019 19:32 | 1.2    | 0.4833 | 1.9552 | 1.1833 | 0.5913 | 2.6    | 0.1577 | -0.7418 |
| 4/24/2019 19:33 | 1.1583 | 1.2    | 2.163  | 1.075  | 0.5913 | 2.6    | 0.1587 | -0.7418 |
| 4/24/2019 19:34 | 1.1333 | 1.25   | 2.2939 | 0.9833 | 0.5913 | 2.6    | 0.1444 | -0.7418 |
| 4/24/2019 19:35 | 1.1    | 1.2167 | 2.3387 | 0.6833 | 0.5913 | 2.6    | 0.1588 | -0.7418 |
| 4/24/2019 19:36 | 1.1    | 1.2333 | 2.2063 | 0.9167 | 0.5913 | 2.6    | 0.1446 | -0.7418 |
| 4/24/2019 19:37 | 1.1    | 1.35   | 2.3082 | 0.5833 | 0.5913 | 2.6    | 0.1594 | -0.7418 |
| 4/24/2019 19:38 | 1.0667 | 1.25   | 2.5018 | 0.9    | 0.5913 | 2.6    | 0.159  | -0.7418 |
| 4/24/2019 19:39 | 1      | 1.6    | 2.2649 | 1      | 0.5913 | 2.5    | 0.1487 | -0.7418 |
| 4/24/2019 19:40 | 0.9917 | 1.3333 | 2.4263 | 0.975  | 0.5913 | 2.5    | 0.1626 | -0.7418 |
| 4/24/2019 19:41 | 1      | 1.3833 | 1.7139 | 0.7167 | 0.5913 | 2.59   | 0.1449 | -0.7418 |
| 4/24/2019 19:42 | 1      | 1.5    | 2.4145 | 0.9167 | 0.5913 | 2.6    | 0.1554 | -0.7418 |
| 4/24/2019 19:43 | 1      | 0.9333 | 2.1792 | 0.85   | 0.5913 | 2.6    | 0.1604 | -0.7418 |

|                 |        |        |        |        |        |        |        |         |
|-----------------|--------|--------|--------|--------|--------|--------|--------|---------|
| 4/24/2019 19:44 | 1      | 1.2833 | 2.2597 | 1.0667 | 0.5913 | 2.63   | 0.1457 | -0.7418 |
| 4/24/2019 19:45 | 1      | 0.7    | 2.3633 | 0.55   | 0.5913 | 2.7    | 0.1609 | -0.7418 |
| 4/24/2019 19:46 | 1      | 1.1333 | 2.1502 | 1.0833 | 0.5913 | 2.7    | 0.1449 | -0.7418 |
| 4/24/2019 19:47 | 1      | 1.6167 | 2.2524 | 1.2167 | 0.5913 | 2.7    | 0.1549 | -0.7418 |
| 4/24/2019 19:48 | 0.975  | 0.8    | 2.0751 | 1.3083 | 0.5913 | 2.73   | 0.1544 | -0.7418 |
| 4/24/2019 19:49 | 0.9667 | 1.3667 | 2.0662 | 1.2167 | 0.5913 | 2.8909 | 0.1436 | -0.7418 |
| 4/24/2019 19:50 | 1      | 0.7167 | 2.3663 | 0.8833 | 0.5913 | 2.87   | 0.1651 | -0.7418 |
| 4/24/2019 19:51 | 1.075  | 1.0833 | 2.2856 | 1.025  | 0.5913 | 2.8545 | 0.142  | -0.7418 |
| 4/24/2019 19:52 | 1.1    | 0.7167 | 1.9445 | 0.6333 | 0.5913 | 2.84   | 0.1556 | -0.7418 |
| 4/24/2019 19:53 | 1.1    | 0.7333 | 2.4086 | 0.8167 | 0.5913 | 2.9    | 0.1567 | -0.7418 |
| 4/24/2019 19:54 | 1.1    | 0.8    | 2.3826 | 1.05   | 0.5913 | 2.9    | 0.1488 | -0.7418 |
| 4/24/2019 19:55 | 1.1    | 0.65   | 2.1915 | 1.1167 | 0.5913 | 2.9    | 0.1591 | -0.7418 |
| 4/24/2019 19:56 | 1.0167 | 0.3667 | 1.9073 | 0.45   | 0.5913 | 2.8889 | 0.1463 | -0.7418 |
| 4/24/2019 19:57 | 1.0333 | 1      | 1.8001 | 0.9833 | 0.5913 | 2.8455 | 0.1514 | -0.7418 |
| 4/24/2019 19:58 | 1.0833 | 0.1833 | 2.2557 | 0.8333 | 0.5913 | 2.84   | 0.1562 | -0.7418 |
| 4/24/2019 19:59 | 1.1    | 1.15   | 1.978  | 0.95   | 0.5913 | 2.9    | 0.1489 | -0.7418 |
| 4/24/2019 20:00 | 1.1167 | 0.8667 | 2.1695 | 0.5667 | 0.5913 | 2.9    | 0.1584 | -0.7418 |
| 4/24/2019 20:01 | 1.1083 | 0.85   | 2.4039 | 0.4333 | 0.5913 | 2.7583 | 0.1477 | -0.7418 |
| 4/24/2019 20:02 | 1.1333 | 0.9    | 2.3128 | 0.8167 | 0.5913 | 2.7778 | 0.1521 | -0.7418 |
| 4/24/2019 20:03 | 1.1    | 0.4    | 2.2452 | 0.8583 | 0.5913 | 2.8    | 0.1542 | -0.7418 |
| 4/24/2019 20:04 | 1.1167 | 0.8333 | 2.491  | 0.725  | 0.5913 | 2.8    | 0.147  | -0.7418 |
| 4/24/2019 20:05 | 1.15   | 1.3    | 1.701  | 0.6333 | 0.5913 | 2.8    | 0.1557 | -0.7418 |
| 4/24/2019 20:06 | 1.1917 | 0.5    | 1.9277 | 0.8667 | 0.5913 | 2.8    | 0.1451 | -0.7418 |
| 4/24/2019 20:07 | 1.1417 | 0.35   | 2.338  | 0.5917 | 0.5913 | 2.8    | 0.1525 | -0.7418 |
| 4/24/2019 20:08 | 1.1    | 0.8167 | 2.1485 | 1.0583 | 0.5913 | 2.8    | 0.1529 | -0.7418 |
| 4/24/2019 20:09 | 1.1583 | 1.1833 | 2.051  | 0.775  | 0.5913 | 2.8    | 0.1381 | -0.7418 |
| 4/24/2019 20:10 | 1.1    | 0.6167 | 2.1458 | 0.8083 | 0.5913 | 2.8    | 0.1615 | -0.7418 |
| 4/24/2019 20:11 | 1.1    | 0.5833 | 2.2323 | 1.075  | 0.5913 | 2.8    | 0.1439 | -0.7418 |
| 4/24/2019 20:12 | 1.1091 | 1.3833 | 2.1695 | 0.5    | 0.5913 | 2.8    | 0.1494 | -0.7418 |
| 4/24/2019 20:13 | 1.2    | 0.2    | 2.3817 | 0.525  | 0.5913 | 2.8    | 0.1539 | -0.7418 |
| 4/24/2019 20:14 | 1.2    | 1.55   | 2.0755 | 0.725  | 0.5913 | 2.78   | 0.15   | -0.7418 |
| 4/24/2019 20:15 | 1.15   | 0.45   | 2.2617 | 0.8    | 0.5913 | 2.7    | 0.1565 | -0.7418 |
| 4/24/2019 20:16 | 1.1    | 0.1667 | 1.8997 | 0.95   | 0.5913 | 2.7    | 0.1435 | -0.7418 |
| 4/24/2019 20:17 | 1.1917 | 1.5167 | 2.3252 | 0.5833 | 0.5913 | 2.7    | 0.1554 | -0.7418 |
| 4/24/2019 20:18 | 1.2    | 1.05   | 1.6678 | 0.3917 | 0.5913 | 2.7    | 0.1523 | -0.7418 |
| 4/24/2019 20:19 | 1.2    | 0.1833 | 1.7943 | 1.1583 | 0.5913 | 2.7    | 0.1432 | -0.7418 |
| 4/24/2019 20:20 | 1.2    | 1.1833 | 1.9043 | 0.4583 | 0.5913 | 2.6889 | 0.1578 | -0.7418 |
| 4/24/2019 20:21 | 1.2    | 0.2333 | 1.9178 | 0.45   | 0.5913 | 2.6818 | 0.1517 | -0.7418 |
| 4/24/2019 20:22 | 1.1333 | 0.55   | 1.8737 | 0.0083 | 0.5913 | 2.7    | 0.1386 | -0.7418 |
| 4/24/2019 20:23 | 1.0583 | 0.7    | 2.2792 | 0.9667 | 0.5913 | 2.7    | 0.1452 | -0.7418 |
| 4/24/2019 20:24 | 1      | 0.7333 | 2.2905 | 0.0917 | 0.5913 | 2.7    | 0.1444 | -0.7418 |
| 4/24/2019 20:25 | 1      | 0.35   | 1.87   | 0.5583 | 0.5913 | 2.7    | 0.1522 | -0.7418 |
| 4/24/2019 20:26 | 1      | 0.8833 | 2.3538 | 0.5417 | 0.5913 | 2.7    | 0.1463 | -0.7418 |
| 4/24/2019 20:27 | 1.0083 | 0.6833 | 2.0795 | 0.1167 | 0.5913 | 2.7091 | 0.1338 | -0.7418 |
| 4/24/2019 20:28 | 1.1    | 0.6167 | 1.8652 | 0.6    | 0.5913 | 2.7545 | 0.1562 | -0.7418 |
| 4/24/2019 20:29 | 1.1    | 0.7    | 1.9627 | 0.75   | 0.5913 | 2.73   | 0.131  | -0.7418 |
| 4/24/2019 20:30 | 1.05   | 0.7167 | 2.353  | 0.4833 | 0.5913 | 2.78   | 0.1528 | -0.7418 |



|                 |        |         |        |        |        |        |        |         |
|-----------------|--------|---------|--------|--------|--------|--------|--------|---------|
| 4/24/2019 20:31 | 0.9417 | 1.3     | 1.9865 | 0.4917 | 0.5913 | 2.8    | 0.1473 | -0.7418 |
| 4/24/2019 20:32 | 0.9    | 0.2167  | 1.8262 | 0.65   | 0.5913 | 2.8    | 0.1445 | -0.7418 |
| 4/24/2019 20:33 | 0.9    | 0.5     | 1.9515 | 1.2833 | 0.5913 | 2.77   | 0.1568 | -0.7418 |
| 4/24/2019 20:34 | 0.9083 | 0.95    | 2.1402 | 0.6333 | 0.5913 | 2.7    | 0.1464 | -0.7418 |
| 4/24/2019 20:35 | 0.925  | -0.0667 | 2.127  | 0.6    | 0.5913 | 2.7    | 0.1534 | -0.7418 |
| 4/24/2019 20:36 | 0.9583 | 0.1833  | 1.8178 | 0.6    | 0.5913 | 2.7    | 0.1552 | -0.7418 |
| 4/24/2019 20:37 | 0.9167 | 0.9167  | 1.9785 | 0.7333 | 0.5913 | 2.74   | 0.1449 | -0.7418 |
| 4/24/2019 20:38 | 0.8917 | 0.4667  | 1.9358 | 0.675  | 0.5913 | 2.8    | 0.1595 | -0.7418 |
| 4/24/2019 20:39 | 0.8667 | 0.0167  | 1.98   | 0.6417 | 0.5913 | 2.8    | 0.1441 | -0.7418 |
| 4/24/2019 20:40 | 0.9    | 0.5667  | 2.2247 | 0.55   | 0.5913 | 2.8    | 0.1498 | -0.7418 |
| 4/24/2019 20:41 | 0.9    | 0.7167  | 2.136  | 0.7667 | 0.5913 | 2.8    | 0.1537 | -0.7418 |
| 4/24/2019 20:42 | 0.9091 | 0.9167  | 1.6088 | 0.3583 | 0.5913 | 2.8    | 0.1435 | -0.7418 |
| 4/24/2019 20:43 | 0.9    | 0.6833  | 1.9482 | 0.15   | 0.5913 | 2.8    | 0.1615 | -0.7418 |
| 4/24/2019 20:44 | 0.9    | 0.6333  | 1.9102 | 0.6833 | 0.5913 | 2.8    | 0.1415 | -0.7418 |
| 4/24/2019 20:45 | 0.9    | 0.5667  | 2.2513 | 0.575  | 0.5913 | 2.8    | 0.1548 | -0.7418 |
| 4/24/2019 20:46 | 0.9    | 0.7667  | 2.044  | 0.075  | 0.5913 | 2.8    | 0.1565 | -0.7418 |
| 4/24/2019 20:47 | 0.9    | 1.0167  | 2.1862 | 0.1667 | 0.5913 | 2.8    | 0.1464 | -0.7418 |
| 4/24/2019 20:48 | 0.8    | -0.0333 | 1.6218 | 0.1167 | 0.5913 | 2.8    | 0.1569 | -0.7418 |
| 4/24/2019 20:49 | 0.8    | 0.5667  | 1.9937 | 0.6    | 0.5913 | 2.8    | 0.1388 | -0.7418 |
| 4/24/2019 20:50 | 0.8    | 0.2333  | 2.1732 | 0.625  | 0.5913 | 2.8    | 0.1533 | -0.7418 |
| 4/24/2019 20:51 | 0.8417 | 0.0667  | 2.512  | 0.5083 | 0.5913 | 2.8    | 0.1484 | -0.7418 |
| 4/24/2019 20:52 | 0.9    | 0.7667  | 2.1932 | -0.375 | 0.5913 | 2.8    | 0.1369 | -0.7418 |
| 4/24/2019 20:53 | 0.9417 | 1.2167  | 2.3877 | 0.75   | 0.5913 | 2.8    | 0.1632 | -0.7418 |
| 4/24/2019 20:54 | 0.9083 | 0.8167  | 2.2093 | 0.575  | 0.5913 | 2.775  | 0.1478 | -0.7418 |
| 4/24/2019 20:55 | 0.825  | 0.35    | 1.8148 | 0.275  | 0.5913 | 2.8    | 0.1474 | -0.7418 |
| 4/24/2019 20:56 | 0.8    | 1       | 2.4077 | 0.475  | 0.5913 | 2.8    | 0.1503 | -0.7418 |
| 4/24/2019 20:57 | 0.8    | 1.0167  | 1.9622 | -0.025 | 0.5913 | 2.7444 | 0.1449 | -0.7418 |
| 4/24/2019 20:58 | 0.8    | 0.8833  | 1.4973 | 0.7667 | 0.5913 | 2.7    | 0.1593 | -0.7418 |
| 4/24/2019 20:59 | 0.8    | 0.5667  | 1.9137 | 0.4833 | 0.5913 | 2.7    | 0.1461 | -0.7418 |
| 4/24/2019 21:00 | 0.8    | 0.6833  | 2.0725 | 0.475  | 0.5913 | 2.8    | 0.1484 | -0.7418 |
| 4/24/2019 21:01 | 0.8333 | 0.4167  | 1.9433 | 0.3333 | 0.5913 | 2.8    | 0.1498 | -0.7418 |
| 4/24/2019 21:02 | 0.8833 | 0.6667  | 1.9912 | 0.5917 | 0.5913 | 2.8    | 0.1468 | -0.7418 |
| 4/24/2019 21:03 | 0.9    | 0.7833  | 2.0513 | 0.5167 | 0.5913 | 2.8    | 0.1457 | -0.7418 |
| 4/24/2019 21:04 | 0.9833 | 1.1667  | 2.2795 | 0.2417 | 0.5913 | 2.8    | 0.1465 | -0.7418 |
| 4/24/2019 21:05 | 0.9667 | 0.7     | 1.9428 | 0.5917 | 0.5913 | 2.8    | 0.1523 | -0.7418 |
| 4/24/2019 21:06 | 0.9    | 0.5167  | 1.945  | 0.6    | 0.5913 | 2.825  | 0.1483 | -0.7418 |
| 4/24/2019 21:07 | 0.875  | 0.3333  | 1.9067 | 0.2667 | 0.5913 | 2.8375 | 0.148  | -0.7418 |
| 4/24/2019 21:08 | 0.875  | 0.8333  | 2.1627 | 0.7583 | 0.5913 | 2.87   | 0.157  | -0.7418 |
| 4/24/2019 21:09 | 0.85   | 0.6167  | 1.6995 | 0.4417 | 0.5913 | 2.9    | 0.1408 | -0.7418 |
| 4/24/2019 21:10 | 0.8833 | 0.45    | 1.9088 | 0.7417 | 0.5913 | 2.9    | 0.15   | -0.7418 |
| 4/24/2019 21:11 | 0.8    | 0.3667  | 1.9607 | 0.0417 | 0.5913 | 2.9    | 0.144  | -0.7418 |
| 4/24/2019 21:12 | 0.8    | 0.8     | 1.8768 | 1.15   | 0.5913 | 2.9    | 0.1453 | -0.7418 |
| 4/24/2019 21:13 | 0.8    | 0.3667  | 2.1852 | 0.5    | 0.5913 | 2.9    | 0.1591 | -0.7418 |
| 4/24/2019 21:14 | 0.8583 | 0.5833  | 2.1535 | 0.4833 | 0.5913 | 2.9    | 0.149  | -0.7418 |
| 4/24/2019 21:15 | 0.8417 | 0.2333  | 2.037  | 0.25   | 0.5913 | 2.9    | 0.1581 | -0.7418 |
| 4/24/2019 21:16 | 0.8    | 1.1     | 1.9562 | 0.5417 | 0.5913 | 2.9    | 0.1543 | -0.7418 |
| 4/24/2019 21:17 | 0.8    | 0.3     | 2.003  | 0.7833 | 0.5913 | 2.9    | 0.1488 | -0.7418 |

|                 |        |        |        |        |        |        |        |         |
|-----------------|--------|--------|--------|--------|--------|--------|--------|---------|
| 4/24/2019 21:18 | 0.8    | 0.6167 | 2.0163 | 0.5583 | 0.5913 | 2.9    | 0.1588 | -0.7418 |
| 4/24/2019 21:19 | 0.7417 | 1.1333 | 1.9215 | 0.7417 | 0.5913 | 2.9    | 0.1404 | -0.7418 |
| 4/24/2019 21:20 | 0.8    | 0.15   | 1.5638 | 0.65   | 0.5913 | 2.9    | 0.1504 | -0.7418 |
| 4/24/2019 21:21 | 0.8    | 0.05   | 2.3848 | 0.4667 | 0.5913 | 2.9    | 0.1458 | -0.7418 |
| 4/24/2019 21:22 | 0.8    | 0.2333 | 2.1763 | 0.7083 | 0.5913 | 2.9    | 0.1477 | -0.7418 |
| 4/24/2019 21:23 | 0.8    | 0.4167 | 1.7265 | 0.275  | 0.5913 | 2.96   | 0.1642 | -0.7418 |
| 4/24/2019 21:24 | 0.7083 | 0.6833 | 1.843  | 0.7167 | 0.5913 | 2.94   | 0.1346 | -0.7418 |
| 4/24/2019 21:25 | 0.7    | 0.9    | 2.0352 | 0.725  | 0.5913 | 2.9727 | 0.1577 | -0.7418 |
| 4/24/2019 21:26 | 0.7417 | 0.4333 | 2.4033 | 0.1167 | 0.5913 | 3      | 0.1384 | -0.7418 |
| 4/24/2019 21:27 | 0.8    | 1.1333 | 1.8733 | 1.1083 | 0.5913 | 3      | 0.1534 | -0.7418 |
| 4/24/2019 21:28 | 0.8    | 0.1667 | 2.1128 | 1.0167 | 0.5913 | 3      | 0.1511 | -0.7418 |
| 4/24/2019 21:29 | 0.8167 | 0.3333 | 1.9757 | 0.4917 | 0.5913 | 3      | 0.1438 | -0.7418 |
| 4/24/2019 21:30 | 0.8    | 0.8667 | 2.2363 | 0.9833 | 0.5913 | 3      | 0.1503 | -0.7418 |
| 4/24/2019 21:31 | 0.8    | 0.5167 | 2.0567 | 0.675  | 0.5913 | 2.96   | 0.1508 | -0.7418 |
| 4/24/2019 21:32 | 0.7083 | 0.3167 | 2.1252 | 0.2917 | 0.5913 | 2.97   | 0.1474 | -0.7418 |
| 4/24/2019 21:33 | 0.75   | 1.15   | 2.3344 | 0.5167 | 0.5913 | 3      | 0.1493 | -0.7418 |
| 4/24/2019 21:34 | 0.8    | 0.1833 | 1.9152 | 0.9167 | 0.5913 | 2.9818 | 0.135  | -0.7418 |
| 4/24/2019 21:35 | 0.8    | 0.5    | 2.0578 | 0.875  | 0.5913 | 2.9    | 0.1525 | -0.7418 |
| 4/24/2019 21:36 | 0.8    | 0.9    | 1.84   | 0.8417 | 0.5913 | 2.9    | 0.1404 | -0.7418 |
| 4/24/2019 21:37 | 0.8    | 0.5833 | 1.8988 | 0.125  | 0.5913 | 2.9    | 0.1492 | -0.7418 |
| 4/24/2019 21:38 | 0.8    | 0.7333 | 2.1512 | 0.7333 | 0.5913 | 2.9    | 0.1539 | -0.7418 |
| 4/24/2019 21:39 | 0.8    | 0.6333 | 2.2908 | 0.65   | 0.5913 | 2.9    | 0.1397 | -0.7418 |
| 4/24/2019 21:40 | 0.8    | 0.7167 | 2.5017 | 1.2083 | 0.5913 | 2.9    | 0.1556 | -0.7418 |
| 4/24/2019 21:41 | 0.9    | 0.7667 | 1.921  | 0.7333 | 0.5913 | 2.9273 | 0.1495 | -0.7418 |
| 4/24/2019 21:42 | 0.9    | 0.5333 | 2.1349 | 0.9167 | 0.5913 | 2.9818 | 0.1453 | -0.7418 |
| 4/24/2019 21:43 | 0.875  | 0.7833 | 1.7834 | 0.4    | 0.5913 | 2.9273 | 0.1543 | -0.7418 |
| 4/24/2019 21:44 | 0.8    | 0.1    | 2.0653 | 0.6833 | 0.5913 | 3      | 0.14   | -0.7418 |
| 4/24/2019 21:45 | 0.8917 | 1.1833 | 2.1266 | 0.4833 | 0.5913 | 2.9727 | 0.1538 | -0.7418 |
| 4/24/2019 21:46 | 0.9    | 0.1333 | 2.3593 | 0.9917 | 0.5913 | 3      | 0.1464 | -0.7418 |
| 4/24/2019 21:47 | 0.9083 | 0.7667 | 2.0567 | 0.8083 | 0.5913 | 3      | 0.1493 | -0.7418 |
| 4/24/2019 21:48 | 0.9    | 0.9333 | 2.3858 | 0.7083 | 0.5913 | 3      | 0.1613 | -0.7418 |
| 4/24/2019 21:49 | 1      | 0.8667 | 2.3214 | 0.9083 | 0.5913 | 3      | 0.1477 | -0.7418 |
| 4/24/2019 21:50 | 0.9833 | 0.1667 | 1.9004 | 0.6667 | 0.5913 | 3      | 0.1527 | -0.7418 |
| 4/24/2019 21:51 | 0.9    | 0.3833 | 2.1407 | 0.2917 | 0.5913 | 3      | 0.1537 | -0.7418 |
| 4/24/2019 21:52 | 0.9    | 0.75   | 2.3495 | 0.5167 | 0.5913 | 3      | 0.1421 | -0.7418 |
| 4/24/2019 21:53 | 0.9    | 0.8833 | 2.26   | 0.8333 | 0.5913 | 3      | 0.1508 | -0.7418 |
| 4/24/2019 21:54 | 0.925  | 0.1    | 1.8587 | 1.6    | 0.5913 | 3      | 0.1409 | -0.7418 |
| 4/24/2019 21:55 | 0.9167 | 1.3167 | 2.0137 | 0.2833 | 0.5913 | 3      | 0.1554 | -0.7418 |
| 4/24/2019 21:56 | 0.9167 | 0.95   | 2.0549 | 1.1167 | 0.5913 | 3      | 0.1505 | -0.7418 |
| 4/24/2019 21:57 | 0.9    | 0.9167 | 2.0977 | 0.95   | 0.5913 | 3      | 0.1461 | -0.7418 |
| 4/24/2019 21:58 | 0.9    | 1.1333 | 2.2163 | 0.3583 | 0.5913 | 2.96   | 0.1566 | -0.7418 |
| 4/24/2019 21:59 | 0.9667 | 0.85   | 2.0631 | 0.4667 | 0.5913 | 2.95   | 0.1455 | -0.7418 |
| 4/24/2019 22:00 | 1.0167 | 0.4167 | 1.9399 | 0.425  | 0.5913 | 2.98   | 0.1579 | -0.7418 |
| 4/24/2019 22:01 | 1.0833 | 0.9667 | 2.0583 | 1.0083 | 0.5913 | 2.9455 | 0.1556 | -0.7418 |
| 4/24/2019 22:02 | 1      | 0.85   | 1.8671 | 0.4833 | 0.5913 | 3      | 0.1463 | -0.7418 |
| 4/24/2019 22:03 | 0.9818 | 0.9167 | 2.1311 | 0.4833 | 0.5913 | 3      | 0.155  | -0.7418 |
| 4/24/2019 22:04 | 0.9833 | 0.6333 | 2.2749 | 0.9917 | 0.5913 | 3      | 0.1379 | -0.7418 |

|                 |        |         |        |         |        |        |        |         |
|-----------------|--------|---------|--------|---------|--------|--------|--------|---------|
| 4/24/2019 22:05 | 1.025  | -0.0333 | 2.2468 | 0.6833  | 0.5913 | 2.95   | 0.1545 | -0.7418 |
| 4/24/2019 22:06 | 1      | 0.8333  | 2.1968 | 0.4667  | 0.5913 | 2.9    | 0.1519 | -0.7418 |
| 4/24/2019 22:07 | 1      | 0.4167  | 2.2478 | 0.7167  | 0.5913 | 2.9    | 0.1485 | -0.7418 |
| 4/24/2019 22:08 | 0.9583 | 0.5833  | 2.3302 | 0.6833  | 0.5913 | 2.9    | 0.1561 | -0.7418 |
| 4/24/2019 22:09 | 1      | 0.7833  | 2.338  | 0.225   | 0.5913 | 2.92   | 0.1453 | -0.7418 |
| 4/24/2019 22:10 | 1.0917 | 0.8667  | 2.1719 | 0.4417  | 0.5913 | 3      | 0.1574 | -0.7418 |
| 4/24/2019 22:11 | 1      | 0.8833  | 2.0965 | 0.9667  | 0.5913 | 3      | 0.1492 | -0.7418 |
| 4/24/2019 22:12 | 1      | 0.9     | 2.2667 | 0.7     | 0.5913 | 3      | 0.1447 | -0.7418 |
| 4/24/2019 22:13 | 1      | 0.8     | 2.0007 | 1.0417  | 0.5913 | 3      | 0.1607 | -0.7418 |
| 4/24/2019 22:14 | 1      | -0.0333 | 2.0137 | 0.5417  | 0.5913 | 3      | 0.1402 | -0.7418 |
| 4/24/2019 22:15 | 1      | 0.6833  | 1.85   | 0.5333  | 0.5913 | 3      | 0.1567 | -0.7418 |
| 4/24/2019 22:16 | 0.9    | 0.5167  | 2.0191 | 0.475   | 0.5913 | 3      | 0.146  | -0.7418 |
| 4/24/2019 22:17 | 0.9    | 0.8167  | 2.1601 | 0.5     | 0.5913 | 3      | 0.149  | -0.7418 |
| 4/24/2019 22:18 | 0.9583 | 0.25    | 2.0152 | 0.8167  | 0.5913 | 2.9417 | 0.1604 | -0.7418 |
| 4/24/2019 22:19 | 1      | 0.65    | 2.1057 | 0.7333  | 0.5913 | 2.9    | 0.138  | -0.7418 |
| 4/24/2019 22:20 | 1      | 0.35    | 2.124  | 0.475   | 0.5913 | 2.9    | 0.1558 | -0.7418 |
| 4/24/2019 22:21 | 0.9667 | 0.6167  | 2.2386 | 0.5417  | 0.5913 | 2.9    | 0.1489 | -0.7418 |
| 4/24/2019 22:22 | 0.9    | 0.55    | 1.9082 | 1.0167  | 0.5913 | 2.9    | 0.1499 | -0.7418 |
| 4/24/2019 22:23 | 0.8667 | 0.3     | 1.9564 | 0.4333  | 0.5913 | 2.9    | 0.1539 | -0.7418 |
| 4/24/2019 22:24 | 0.875  | 0.3833  | 1.9643 | 0.2083  | 0.5913 | 2.9    | 0.1429 | -0.7418 |
| 4/24/2019 22:25 | 0.8    | 0.6667  | 2.0834 | 0.7833  | 0.5913 | 2.9    | 0.16   | -0.7418 |
| 4/24/2019 22:26 | 0.775  | 0.8833  | 1.9673 | 0.925   | 0.5913 | 2.9    | 0.1494 | -0.7418 |
| 4/24/2019 22:27 | 0.7    | 0.9333  | 1.9568 | 0.4917  | 0.5913 | 2.9    | 0.1473 | -0.7418 |
| 4/24/2019 22:28 | 0.7    | 1.35    | 2.299  | 0.9167  | 0.5913 | 2.9    | 0.1532 | -0.7418 |
| 4/24/2019 22:29 | 0.7833 | 0.3333  | 1.9306 | 0.3833  | 0.5913 | 2.9    | 0.1425 | -0.7418 |
| 4/24/2019 22:30 | 0.8    | 0.3     | 2.1109 | 0.5667  | 0.5913 | 2.9    | 0.153  | -0.7418 |
| 4/24/2019 22:31 | 0.875  | 0.6     | 1.978  | 0.975   | 0.5913 | 2.9727 | 0.1554 | -0.7418 |
| 4/24/2019 22:32 | 0.9    | 1.2167  | 2.3216 | 0.0583  | 0.5913 | 3      | 0.1445 | -0.7418 |
| 4/24/2019 22:33 | 0.825  | 0.7     | 2.26   | -0.1083 | 0.5913 | 3      | 0.1578 | -0.7418 |
| 4/24/2019 22:34 | 0.8    | 0.3333  | 1.8669 | 0.2     | 0.5913 | 3      | 0.1432 | -0.7418 |
| 4/24/2019 22:35 | 0.8    | 0.0667  | 1.9843 | 0.4833  | 0.5913 | 3      | 0.1509 | -0.7418 |
| 4/24/2019 22:36 | 0.8    | 0.2833  | 2.2279 | 1.0083  | 0.5913 | 3      | 0.1538 | -0.7418 |
| 4/24/2019 22:37 | 0.7917 | 1.55    | 2.0433 | 0.4083  | 0.5913 | 3      | 0.1501 | -0.7418 |
| 4/24/2019 22:38 | 0.7083 | 0.6333  | 2.0508 | 0.2167  | 0.5913 | 3      | 0.1546 | -0.7418 |
| 4/24/2019 22:39 | 0.7167 | 0.7167  | 2.2028 | 1.1167  | 0.5913 | 2.9818 | 0.1458 | -0.7418 |
| 4/24/2019 22:40 | 0.8    | 0.3167  | 2.4191 | 0.7333  | 0.5913 | 2.9444 | 0.154  | -0.7418 |
| 4/24/2019 22:41 | 0.8417 | 0.8333  | 2.4498 | 1.1417  | 0.5913 | 3      | 0.1494 | -0.7418 |
| 4/24/2019 22:42 | 0.9    | 1.2667  | 1.8779 | 1.1083  | 0.5913 | 3      | 0.1482 | -0.7418 |
| 4/24/2019 22:43 | 0.9    | 0.6167  | 2.1538 | 0.275   | 0.5913 | 3      | 0.1567 | -0.7418 |
| 4/24/2019 22:44 | 0.9    | 0.3333  | 1.8693 | 0.7667  | 0.5913 | 3      | 0.1372 | -0.7418 |
| 4/24/2019 22:45 | 0.9    | 0.6833  | 2.0846 | 0.3333  | 0.5913 | 3      | 0.155  | -0.7418 |
| 4/24/2019 22:46 | 0.9    | 0.65    | 1.9424 | 0.2667  | 0.5913 | 3      | 0.1453 | -0.7418 |
| 4/24/2019 22:47 | 0.9    | 0.6833  | 2.368  | 0.5917  | 0.5913 | 3      | 0.1506 | -0.7418 |
| 4/24/2019 22:48 | 0.8333 | 0.55    | 2.0526 | 0.4333  | 0.5913 | 3      | 0.1554 | -0.7418 |
| 4/24/2019 22:49 | 0.8167 | 0.2     | 2.0289 | 0.6     | 0.5913 | 3      | 0.146  | -0.7418 |
| 4/24/2019 22:50 | 0.8    | 0.4667  | 2.1556 | 0.2167  | 0.5913 | 3      | 0.1569 | -0.7418 |
| 4/24/2019 22:51 | 0.8583 | -0.0333 | 2.2207 | 0.6167  | 0.5913 | 3      | 0.147  | -0.7418 |

|                 |        |         |        |         |        |        |        |         |
|-----------------|--------|---------|--------|---------|--------|--------|--------|---------|
| 4/24/2019 22:52 | 0.9    | 0.75    | 2.4119 | 1.4417  | 0.5913 | 3      | 0.1452 | -0.7418 |
| 4/24/2019 22:53 | 0.9    | 0.7167  | 2.2838 | 0.6333  | 0.5913 | 3      | 0.1519 | -0.7418 |
| 4/24/2019 22:54 | 0.9    | 0.6333  | 2.07   | 0.25    | 0.5913 | 2.98   | 0.1433 | -0.7418 |
| 4/24/2019 22:55 | 0.875  | 0.3333  | 2.0072 | 0.9167  | 0.5913 | 3      | 0.1497 | -0.7418 |
| 4/24/2019 22:56 | 0.8083 | 0.8167  | 1.764  | 0.5917  | 0.5913 | 3      | 0.1449 | -0.7418 |
| 4/24/2019 22:57 | 0.8    | 0.6667  | 2.1683 | 0.4417  | 0.5913 | 3      | 0.1457 | -0.7418 |
| 4/24/2019 22:58 | 0.8    | 0.5833  | 1.9583 | 0.7083  | 0.5913 | 3      | 0.1569 | -0.7418 |
| 4/24/2019 22:59 | 0.8    | 0.5167  | 1.9093 | 0.6583  | 0.5913 | 2.9091 | 0.1401 | -0.7418 |
| 4/24/2019 23:00 | 0.8    | 0.8333  | 1.6818 | 0.5583  | 0.5913 | 2.9    | 0.1538 | -0.7418 |
| 4/24/2019 23:01 | 0.8    | 0.8     | 2.2854 | 0.1417  | 0.5913 | 2.9273 | 0.1475 | -0.7418 |
| 4/24/2019 23:02 | 0.8    | 0.5667  | 2.0576 | 0.9917  | 0.5913 | 2.98   | 0.1516 | -0.7418 |
| 4/24/2019 23:03 | 0.8    | 0.65    | 2.0853 | 0.8     | 0.5913 | 2.9273 | 0.1566 | -0.7418 |
| 4/24/2019 23:04 | 0.8    | 0.7667  | 2.1983 | 0.9417  | 0.5913 | 2.9    | 0.1467 | -0.7418 |
| 4/24/2019 23:05 | 0.8    | 0.7667  | 1.8735 | 1.0333  | 0.5913 | 2.93   | 0.1579 | -0.7418 |
| 4/24/2019 23:06 | 0.825  | 0.9333  | 2.0992 | 0.6833  | 0.5913 | 2.94   | 0.145  | -0.7418 |
| 4/24/2019 23:07 | 0.8    | -0.1833 | 2.0595 | 0.9167  | 0.5913 | 2.9    | 0.1515 | -0.7418 |
| 4/24/2019 23:08 | 0.7    | 0.65    | 1.8947 | 0.7     | 0.5913 | 2.9    | 0.152  | -0.7418 |
| 4/24/2019 23:09 | 0.7    | 0.9667  | 2.1907 | 0.4333  | 0.5913 | 2.9    | 0.1421 | -0.7418 |
| 4/24/2019 23:10 | 0.7667 | 0.6     | 1.8543 | 0.8917  | 0.5913 | 2.9    | 0.1489 | -0.7418 |
| 4/24/2019 23:11 | 0.8083 | 1.3     | 2.1973 | 1.2583  | 0.5913 | 2.9    | 0.1423 | -0.7418 |
| 4/24/2019 23:12 | 0.8909 | 1.1333  | 1.9887 | 0.625   | 0.5913 | 2.9    | 0.1515 | -0.7418 |
| 4/24/2019 23:13 | 0.9    | 0.8333  | 2.0132 | 0.6583  | 0.5913 | 2.9    | 0.1564 | -0.7418 |
| 4/24/2019 23:14 | 0.8917 | 0.7     | 2.0408 | 0.9     | 0.5913 | 2.9    | 0.1369 | -0.7418 |
| 4/24/2019 23:15 | 0.8917 | 0.5667  | 2.0495 | 0.875   | 0.5913 | 2.9    | 0.1574 | -0.7418 |
| 4/24/2019 23:16 | 0.8    | 0.3333  | 2.0822 | 0.875   | 0.5913 | 2.9    | 0.1456 | -0.7418 |
| 4/24/2019 23:17 | 0.8    | 0.1833  | 2.0508 | 0.65    | 0.5913 | 2.9    | 0.1457 | -0.7418 |
| 4/24/2019 23:18 | 0.7167 | 0.9     | 1.8578 | 0.975   | 0.5913 | 2.9    | 0.1545 | -0.7418 |
| 4/24/2019 23:19 | 0.7    | 0.55    | 2.0343 | 0.5583  | 0.5913 | 2.9    | 0.1378 | -0.7418 |
| 4/24/2019 23:20 | 0.7    | 0.2167  | 2.1037 | 0.5917  | 0.5913 | 2.9    | 0.1495 | -0.7418 |
| 4/24/2019 23:21 | 0.7    | 0.4833  | 1.9848 | 0.65    | 0.5913 | 2.9    | 0.1473 | -0.7418 |
| 4/24/2019 23:22 | 0.7    | 0.7667  | 2.0067 | 0.0917  | 0.5913 | 2.9    | 0.1381 | -0.7418 |
| 4/24/2019 23:23 | 0.7    | 0.8167  | 1.6253 | 0.125   | 0.5913 | 2.9    | 0.1507 | -0.7418 |
| 4/24/2019 23:24 | 0.7333 | 0.4667  | 2.0203 | 0.1833  | 0.5913 | 2.9    | 0.13   | -0.7418 |
| 4/24/2019 23:25 | 0.7083 | 0.4333  | 1.9567 | 0.6917  | 0.5913 | 2.9    | 0.1493 | -0.7418 |
| 4/24/2019 23:26 | 0.7083 | -0.15   | 1.9497 | 0.25    | 0.5913 | 2.9    | 0.1354 | -0.7418 |
| 4/24/2019 23:27 | 0.7    | 0.05    | 2.0178 | 0.2083  | 0.5913 | 2.9    | 0.1459 | -0.7418 |
| 4/24/2019 23:28 | 0.6083 | 0.0667  | 2.1493 | 0.2583  | 0.5913 | 2.9    | 0.1512 | -0.7418 |
| 4/24/2019 23:29 | 0.6    | 0.6     | 2.1442 | 0.75    | 0.5913 | 2.9    | 0.1395 | -0.7418 |
| 4/24/2019 23:30 | 0.6    | 0.2833  | 1.9927 | 0.1     | 0.5913 | 2.9    | 0.1527 | -0.7418 |
| 4/24/2019 23:31 | 0.6    | 0.6     | 2.2382 | 0.6667  | 0.5913 | 2.9    | 0.1425 | -0.7418 |
| 4/24/2019 23:32 | 0.6083 | -0.0333 | 1.9952 | -0.0667 | 0.5913 | 2.9    | 0.1467 | -0.7418 |
| 4/24/2019 23:33 | 0.6833 | -0.3    | 2.1338 | 0.725   | 0.5913 | 2.9    | 0.1506 | -0.7418 |
| 4/24/2019 23:34 | 0.7    | 0.5333  | 1.8973 | 0.85    | 0.5913 | 2.9    | 0.14   | -0.7418 |
| 4/24/2019 23:35 | 0.75   | 0.8167  | 1.99   | 0.4833  | 0.5913 | 2.9    | 0.1482 | -0.7418 |
| 4/24/2019 23:36 | 0.7    | -0.1167 | 1.9768 | 0.3083  | 0.5913 | 2.87   | 0.1381 | -0.7418 |
| 4/24/2019 23:37 | 0.7    | 0.65    | 1.7038 | 0.775   | 0.5913 | 2.8636 | 0.1451 | -0.7418 |
| 4/24/2019 23:38 | 0.7    | 0.8333  | 2.0223 | 0.2917  | 0.5913 | 2.8222 | 0.1532 | -0.7418 |

|                 |        |         |        |         |        |        |        |         |
|-----------------|--------|---------|--------|---------|--------|--------|--------|---------|
| 4/24/2019 23:39 | 0.7    | 0.4667  | 2.122  | 0.2     | 0.5913 | 2.8909 | 0.1403 | -0.7418 |
| 4/24/2019 23:40 | 0.7    | 0.1     | 1.8325 | -0.05   | 0.5913 | 2.9    | 0.1461 | -0.7418 |
| 4/24/2019 23:41 | 0.7    | 0.2     | 1.7718 | 0.0583  | 0.5913 | 2.9    | 0.1398 | -0.7418 |
| 4/24/2019 23:42 | 0.7    | 0.2833  | 1.9175 | 0.0417  | 0.5913 | 2.9    | 0.1479 | -0.7418 |
| 4/24/2019 23:43 | 0.7    | 0.6333  | 1.8183 | 0.3917  | 0.5913 | 2.9    | 0.1497 | -0.7418 |
| 4/24/2019 23:44 | 0.6417 | 0.8667  | 1.8457 | 0.6     | 0.5913 | 2.9    | 0.1329 | -0.7418 |
| 4/24/2019 23:45 | 0.6    | 0.35    | 2.0118 | 0.2833  | 0.5913 | 2.9    | 0.149  | -0.7418 |
| 4/24/2019 23:46 | 0.6    | 0.3     | 1.6718 | 0.7     | 0.5913 | 2.95   | 0.148  | -0.7418 |
| 4/24/2019 23:47 | 0.6    | 0.15    | 1.6122 | 0.3917  | 0.5913 | 2.9364 | 0.1421 | -0.7418 |
| 4/24/2019 23:48 | 0.6    | -0.0333 | 2.0545 | -0.5667 | 0.5913 | 3      | 0.1529 | -0.7418 |
| 4/24/2019 23:49 | 0.6    | 0.3167  | 1.5336 | -0.4167 | 0.5913 | 3      | 0.1361 | -0.7418 |
| 4/24/2019 23:50 | 0.6    | 0.8167  | 1.6393 | -0.125  | 0.5913 | 3      | 0.1476 | -0.7418 |
| 4/24/2019 23:51 | 0.6    | -0.3667 | 2.3105 | -0.3333 | 0.5913 | 3      | 0.1435 | -0.7418 |
| 4/24/2019 23:52 | 0.6    | 0.2167  | 2.0468 | 0.4167  | 0.5913 | 3      | 0.1431 | -0.7418 |
| 4/24/2019 23:53 | 0.5833 | 0.8667  | 1.4735 | 0.3667  | 0.5913 | 3      | 0.1473 | -0.7418 |
| 4/24/2019 23:54 | 0.5    | 0.05    | 1.7958 | -0.025  | 0.5913 | 3      | 0.142  | -0.7418 |
| 4/24/2019 23:55 | 0.5    | 0.8167  | 1.657  | 0.4083  | 0.5913 | 3      | 0.1355 | -0.7418 |
| 4/24/2019 23:56 | 0.5    | 0.7     | 1.8212 | 0.0667  | 0.5913 | 3      | 0.1563 | -0.7418 |
| 4/24/2019 23:57 | 0.5    | -0.1667 | 1.7903 | 0.275   | 0.5913 | 3.0182 | 0.1463 | -0.7418 |
| 4/24/2019 23:58 | 0.5    | 0.5667  | 1.6282 | -0.2083 | 0.5913 | 3      | 0.1425 | -0.7418 |
| 4/24/2019 23:59 | 0.5    | 0.6167  | 1.7208 | 0.5917  | 0.5913 | 3      | 0.1349 | -0.7418 |
| 4/25/2019 0:00  | 0.5    | 0.2333  | 1.6527 | -0.1083 | 0.5913 | 3      | 0.1564 | -0.7418 |
| 4/25/2019 0:01  | 0.6    | -0.1167 | 1.4628 | 0.5083  | 0.5913 | 3.0727 | 0.1453 | -0.7418 |
| 4/25/2019 0:02  | 0.5167 | 0.25    | 1.9222 | 0.1417  | 0.5913 | 3.1    | 0.1397 | -0.7418 |
| 4/25/2019 0:03  | 0.5083 | 0.7333  | 1.4155 | -0.3833 | 0.5913 | 3.1    | 0.1505 | -0.7418 |
| 4/25/2019 0:04  | 0.525  | -0.2167 | 1.5682 | 0.35    | 0.5913 | 3.1    | 0.1415 | -0.7418 |
| 4/25/2019 0:05  | 0.5    | 0.2833  | 1.2489 | 0.1417  | 0.5913 | 3.1    | 0.1483 | -0.7418 |
| 4/25/2019 0:06  | 0.5    | 0.6833  | 1.5615 | 0.1167  | 0.5913 | 3.1    | 0.1411 | -0.7418 |
| 4/25/2019 0:07  | 0.4833 | -0.0833 | 1.5713 | 0.3417  | 0.5913 | 3.1    | 0.1416 | -0.7418 |
| 4/25/2019 0:08  | 0.4083 | 0.8333  | 1.5387 | 0.3     | 0.5913 | 3.1    | 0.147  | -0.7418 |
| 4/25/2019 0:09  | 0.4    | 0.3     | 1.5863 | -0.1167 | 0.5913 | 3.1    | 0.139  | -0.7418 |
| 4/25/2019 0:10  | 0.4    | -0.3667 | 1.4688 | 0.3167  | 0.5913 | 3.1    | 0.1524 | -0.7418 |
| 4/25/2019 0:11  | 0.4333 | 0.3     | 1.7448 | 0.35    | 0.5913 | 3.1    | 0.1457 | -0.7418 |
| 4/25/2019 0:12  | 0.5    | 0.1833  | 1.604  | 0.2167  | 0.5913 | 3.1    | 0.1383 | -0.7418 |
| 4/25/2019 0:13  | 0.5    | -0.0167 | 1.6928 | 0.1     | 0.5913 | 3.1    | 0.1484 | -0.7418 |
| 4/25/2019 0:14  | 0.5    | 0.0667  | 1.2652 | 0.1833  | 0.5913 | 3.1    | 0.1425 | -0.7418 |
| 4/25/2019 0:15  | 0.5    | 0.25    | 1.2709 | 0.25    | 0.5913 | 3.1    | 0.1458 | -0.7418 |
| 4/25/2019 0:16  | 0.5    | -0.05   | 1.6883 | 0.625   | 0.5913 | 3.1    | 0.1427 | -0.7418 |
| 4/25/2019 0:17  | 0.4583 | -0.0833 | 1.3974 | 0.7417  | 0.5913 | 3.1    | 0.1419 | -0.7418 |
| 4/25/2019 0:18  | 0.5    | 0.2667  | 1.1925 | 0.0333  | 0.5913 | 3.1    | 0.1472 | -0.7418 |
| 4/25/2019 0:19  | 0.5    | 0.4833  | 1.5005 | 0.1833  | 0.5913 | 3.1    | 0.1359 | -0.7418 |
| 4/25/2019 0:20  | 0.5583 | 0.2     | 1.7912 | 0.4     | 0.5913 | 3.1    | 0.1487 | -0.7418 |
| 4/25/2019 0:21  | 0.525  | 0.1833  | 1.2638 | 0.475   | 0.5913 | 3.1    | 0.1522 | -0.7418 |
| 4/25/2019 0:22  | 0.5    | 0.35    | 1.4927 | 0.0667  | 0.5913 | 3.1    | 0.1429 | -0.7418 |
| 4/25/2019 0:23  | 0.5    | 0.65    | 1.5448 | -0.2583 | 0.5913 | 3.15   | 0.1562 | -0.7418 |
| 4/25/2019 0:24  | 0.5    | -0.4167 | 1.4687 | 0.0667  | 0.5913 | 3.2    | 0.1374 | -0.7418 |
| 4/25/2019 0:25  | 0.5333 | -0.0667 | 1.5535 | 0.45    | 0.5913 | 3.2    | 0.1444 | -0.7418 |

|                |        |         |        |         |        |        |        |         |
|----------------|--------|---------|--------|---------|--------|--------|--------|---------|
| 4/25/2019 0:26 | 0.5167 | -0.4167 | 1.5475 | 0.1417  | 0.5913 | 3.2273 | 0.1493 | -0.7418 |
| 4/25/2019 0:27 | 0.5    | -0.1167 | 1.7492 | 0.5833  | 0.5913 | 3.3    | 0.1369 | -0.7418 |
| 4/25/2019 0:28 | 0.5    | 0.1     | 1.1506 | -0.1083 | 0.5913 | 3.3    | 0.1549 | -0.7418 |
| 4/25/2019 0:29 | 0.5917 | 0.1833  | 1.3692 | 0.225   | 0.5913 | 3.3    | 0.1389 | -0.7418 |
| 4/25/2019 0:30 | 0.6    | -0.45   | 1.4019 | -0.4    | 0.5913 | 3.21   | 0.1517 | -0.7418 |
| 4/25/2019 0:31 | 0.6    | 0.4167  | 1.3812 | -0.175  | 0.5913 | 3.3818 | 0.1442 | -0.7418 |
| 4/25/2019 0:32 | 0.5083 | 0.0667  | 1.4729 | 0.1333  | 0.5913 | 3.4    | 0.1382 | -0.7418 |
| 4/25/2019 0:33 | 0.5    | 0.1167  | 1.5045 | -0.2333 | 0.5913 | 3.4    | 0.1475 | -0.7418 |
| 4/25/2019 0:34 | 0.5    | -0.0333 | 1.5573 | 0.4667  | 0.5913 | 3.4    | 0.1435 | -0.7418 |
| 4/25/2019 0:35 | 0.525  | -0.2333 | 1.1526 | 0.4667  | 0.5913 | 3.4    | 0.1577 | -0.7418 |
| 4/25/2019 0:36 | 0.5667 | 0.9     | 1.5038 | 0.525   | 0.5913 | 3.4    | 0.1441 | -0.7418 |
| 4/25/2019 0:37 | 0.5    | 0.3167  | 1.4494 | -0.3167 | 0.5913 | 3.4    | 0.1413 | -0.7418 |
| 4/25/2019 0:38 | 0.4583 | 0.0167  | 1.3963 | 0.2167  | 0.5913 | 3.4    | 0.1499 | -0.7418 |
| 4/25/2019 0:39 | 0.4083 | -0.5167 | 1.5967 | 0.3583  | 0.5913 | 3.31   | 0.1371 | -0.7418 |
| 4/25/2019 0:40 | 0.425  | -0.3    | 1.4339 | -0.1833 | 0.5913 | 3.3    | 0.1502 | -0.7418 |
| 4/25/2019 0:41 | 0.4    | 0.2667  | 1.5958 | 0.2167  | 0.5913 | 3.3    | 0.1371 | -0.7418 |
| 4/25/2019 0:42 | 0.4    | 0.0667  | 1.5653 | -0.5083 | 0.5913 | 3.3    | 0.146  | -0.7418 |
| 4/25/2019 0:43 | 0.4    | 0.6     | 1.3945 | 0.25    | 0.5913 | 3.21   | 0.1499 | -0.7418 |
| 4/25/2019 0:44 | 0.4    | -0.3167 | 1.3449 | 0.05    | 0.5913 | 3.1636 | 0.1329 | -0.7418 |
| 4/25/2019 0:45 | 0.4833 | 0.2167  | 1.6699 | 0.2167  | 0.5913 | 3.15   | 0.1514 | -0.7418 |
| 4/25/2019 0:46 | 0.5    | 1.1167  | 1.5364 | 0.2333  | 0.5913 | 3.2    | 0.1496 | -0.7418 |
| 4/25/2019 0:47 | 0.4917 | 0.2     | 1.2563 | 0.1333  | 0.5913 | 3.2    | 0.1411 | -0.7418 |
| 4/25/2019 0:48 | 0.425  | -0.45   | 1.3052 | 0.175   | 0.5913 | 3.2    | 0.1523 | -0.7418 |
| 4/25/2019 0:49 | 0.4333 | -0.2    | 1.3938 | 0.1667  | 0.5913 | 3.1889 | 0.1367 | -0.7418 |
| 4/25/2019 0:50 | 0.5    | -0.1167 | 1.6241 | 0.6667  | 0.5913 | 3.1545 | 0.151  | -0.7418 |
| 4/25/2019 0:51 | 0.5    | 0.0667  | 1.7323 | 0.7083  | 0.5913 | 3.13   | 0.1455 | -0.7418 |
| 4/25/2019 0:52 | 0.525  | -0.3667 | 1.5653 | 0.1833  | 0.5913 | 3.2    | 0.1393 | -0.7418 |
| 4/25/2019 0:53 | 0.575  | -0.1    | 1.3905 | -0.3833 | 0.5913 | 3.2    | 0.1475 | -0.7418 |
| 4/25/2019 0:54 | 0.5583 | -0.3    | 1.4729 | 0.2167  | 0.5913 | 3.27   | 0.1323 | -0.7418 |
| 4/25/2019 0:55 | 0.5417 | 0.35    | 1.7984 | -0.1333 | 0.5913 | 3.3    | 0.1477 | -0.7418 |
| 4/25/2019 0:56 | 0.4833 | 0.4833  | 1.4705 | 0.1667  | 0.5913 | 3.3    | 0.1391 | -0.7418 |
| 4/25/2019 0:57 | 0.4167 | -0.05   | 1.4669 | 0.2333  | 0.5913 | 3.3    | 0.1413 | -0.7418 |
| 4/25/2019 0:58 | 0.4167 | -1.0167 | 1.5346 | 0.3333  | 0.5913 | 3.3    | 0.1483 | -0.7418 |
| 4/25/2019 0:59 | 0.4333 | -0.0333 | 1.5042 | -0.2917 | 0.5913 | 3.2545 | 0.1344 | -0.7418 |
| 4/25/2019 1:00 | 0.4    | -0.15   | 1.393  | 0.1083  | 0.5913 | 3.3    | 0.1446 | -0.7418 |
| 4/25/2019 1:01 | 0.3583 | 0.5     | 1.5375 | -0.225  | 0.5913 | 3.3    | 0.1472 | -0.7418 |
| 4/25/2019 1:02 | 0.4    | -0.0167 | 1.5018 | -0.375  | 0.5913 | 3.3    | 0.1378 | -0.7418 |
| 4/25/2019 1:03 | 0.4    | 0.3333  | 1.7284 | -0.3667 | 0.5913 | 3.38   | 0.1402 | -0.7418 |
| 4/25/2019 1:04 | 0.4417 | 0.3667  | 1.5584 | -0.3417 | 0.5913 | 3.4    | 0.136  | -0.7418 |
| 4/25/2019 1:05 | 0.4917 | 0.2667  | 1.6746 | -0.05   | 0.5913 | 3.4    | 0.1355 | -0.7418 |
| 4/25/2019 1:06 | 0.5    | -0.1667 | 1.6512 | 0.3667  | 0.5913 | 3.3273 | 0.149  | -0.7418 |
| 4/25/2019 1:07 | 0.5    | 0.4667  | 0.9761 | -0.0167 | 0.5913 | 3.3    | 0.1288 | -0.7418 |
| 4/25/2019 1:08 | 0.5    | -0.0167 | 1.6775 | 0.5917  | 0.5913 | 3.3273 | 0.146  | -0.7418 |
| 4/25/2019 1:09 | 0.5    | -0.5833 | 1.3126 | -0.1833 | 0.5913 | 3.39   | 0.1379 | -0.7418 |
| 4/25/2019 1:10 | 0.5    | -0.35   | 1.3556 | 0.1     | 0.5913 | 3.4    | 0.1381 | -0.7418 |
| 4/25/2019 1:11 | 0.525  | 0       | 1.2515 | 0.4917  | 0.5913 | 3.4    | 0.1479 | -0.7418 |
| 4/25/2019 1:12 | 0.5455 | 0.4833  | 1.7319 | 0.3667  | 0.5913 | 3.4    | 0.1262 | -0.7418 |

|                |        |         |        |         |        |        |        |         |
|----------------|--------|---------|--------|---------|--------|--------|--------|---------|
| 4/25/2019 1:13 | 0.5333 | 0.15    | 1.6579 | 0.275   | 0.5913 | 3.3556 | 0.1392 | -0.7418 |
| 4/25/2019 1:14 | 0.5833 | 0.15    | 1.4722 | 0.1083  | 0.5913 | 3.3    | 0.1451 | -0.7418 |
| 4/25/2019 1:15 | 0.6    | 0.3833  | 1.6303 | 0.2083  | 0.5913 | 3.2818 | 0.1341 | -0.7418 |
| 4/25/2019 1:16 | 0.5818 | 0.3833  | 1.5108 | 0.1583  | 0.5913 | 3.2    | 0.1492 | -0.7418 |
| 4/25/2019 1:17 | 0.525  | -0.2333 | 1.4883 | 0.675   | 0.5913 | 3.24   | 0.1386 | -0.7418 |
| 4/25/2019 1:18 | 0.5    | 0.1167  | 1.378  | -0.3    | 0.5913 | 3.2    | 0.1445 | -0.7418 |
| 4/25/2019 1:19 | 0.5    | 0.3     | 1.5452 | -0.0583 | 0.5913 | 3.2    | 0.149  | -0.7418 |
| 4/25/2019 1:20 | 0.5    | -0.15   | 1.235  | 0.025   | 0.5913 | 3.2    | 0.1324 | -0.7418 |
| 4/25/2019 1:21 | 0.5    | 0.0667  | 1.6293 | 0.3917  | 0.5913 | 3.2    | 0.1489 | -0.7418 |
| 4/25/2019 1:22 | 0.5    | 0.1167  | 1.6716 | 0.1167  | 0.5913 | 3.1909 | 0.1385 | -0.7418 |
| 4/25/2019 1:23 | 0.525  | 0.7167  | 1.7267 | 0.0083  | 0.5913 | 3.1    | 0.1479 | -0.7418 |
| 4/25/2019 1:24 | 0.575  | 0.75    | 1.7476 | -0.275  | 0.5913 | 3.1    | 0.1518 | -0.7418 |
| 4/25/2019 1:25 | 0.6    | 0.1833  | 1.7761 | 0.3083  | 0.5913 | 3.1    | 0.1313 | -0.7418 |
| 4/25/2019 1:26 | 0.65   | 0.4333  | 1.5734 | -0.2333 | 0.5913 | 3.1273 | 0.148  | -0.7418 |
| 4/25/2019 1:27 | 0.6917 | 0.7833  | 1.6822 | -0.1667 | 0.5913 | 3.2    | 0.1395 | -0.7418 |
| 4/25/2019 1:28 | 0.6    | 0.4333  | 1.4636 | -0.3833 | 0.5913 | 3.2    | 0.1441 | -0.7418 |
| 4/25/2019 1:29 | 0.6    | 0.4333  | 1.3139 | 0.1917  | 0.5913 | 3.2    | 0.1521 | -0.7418 |
| 4/25/2019 1:30 | 0.6    | 0.2667  | 1.2961 | 0.325   | 0.5913 | 3.2    | 0.1406 | -0.7418 |
| 4/25/2019 1:31 | 0.6    | 0.4833  | 1.5983 | 0.3083  | 0.5913 | 3.2    | 0.1558 | -0.7418 |
| 4/25/2019 1:32 | 0.6    | 0       | 1.0979 | 0.6833  | 0.5913 | 3.2    | 0.1395 | -0.7418 |
| 4/25/2019 1:33 | 0.6    | -0.05   | 1.5241 | 0.1583  | 0.5913 | 3.2    | 0.1511 | -0.7418 |
| 4/25/2019 1:34 | 0.6    | -0.4333 | 1.3685 | 0.4167  | 0.5913 | 3.2    | 0.1485 | -0.7418 |
| 4/25/2019 1:35 | 0.6    | -0.1    | 1.3615 | 0.125   | 0.5913 | 3.27   | 0.139  | -0.7418 |
| 4/25/2019 1:36 | 0.5167 | -0.6    | 1.3593 | -0.2    | 0.5913 | 3.3    | 0.1519 | -0.7418 |
| 4/25/2019 1:37 | 0.5    | 0.6     | 1.6613 | -0.075  | 0.5913 | 3.3    | 0.1357 | -0.7418 |
| 4/25/2019 1:38 | 0.5    | 0.3667  | 1.7463 | 0       | 0.5913 | 3.3    | 0.1442 | -0.7418 |
| 4/25/2019 1:39 | 0.425  | -0.5167 | 1.7618 | 0.125   | 0.5913 | 3.3    | 0.1486 | -0.7418 |
| 4/25/2019 1:40 | 0.4    | 0.3833  | 1.2773 | 0.1     | 0.5913 | 3.2727 | 0.1357 | -0.7418 |
| 4/25/2019 1:41 | 0.4    | 0.2167  | 1.3136 | 0.7083  | 0.5913 | 3.2636 | 0.1497 | -0.7418 |
| 4/25/2019 1:42 | 0.4727 | 0       | 1.4133 | 0.4167  | 0.5913 | 3.3    | 0.1376 | -0.7418 |
| 4/25/2019 1:43 | 0.5    | -0.65   | 1.6203 | 0.2667  | 0.5913 | 3.3    | 0.1406 | -0.7418 |
| 4/25/2019 1:44 | 0.5    | 0.6667  | 1.3226 | 0.125   | 0.5913 | 3.2182 | 0.1484 | -0.7418 |
| 4/25/2019 1:45 | 0.5    | -0.05   | 1.7673 | -0.175  | 0.5913 | 3.2636 | 0.1326 | -0.7418 |
| 4/25/2019 1:46 | 0.5083 | 0.7     | 1.3222 | 0.1167  | 0.5913 | 3.2    | 0.1496 | -0.7418 |
| 4/25/2019 1:47 | 0.5583 | 0.25    | 1.1765 | 0.0083  | 0.5913 | 3.2    | 0.1382 | -0.7418 |
| 4/25/2019 1:48 | 0.5333 | 0.4167  | 1.5249 | 0.1083  | 0.5913 | 3.2    | 0.1429 | -0.7418 |
| 4/25/2019 1:49 | 0.5    | 0.5833  | 1.3587 | 0.225   | 0.5913 | 3.1556 | 0.1461 | -0.7418 |
| 4/25/2019 1:50 | 0.5417 | 0.15    | 1.4778 | -0.0333 | 0.5913 | 3.1889 | 0.1432 | -0.7418 |
| 4/25/2019 1:51 | 0.55   | -0.3667 | 1.3996 | 0.4833  | 0.5913 | 3.1636 | 0.1568 | -0.7418 |
| 4/25/2019 1:52 | 0.6    | 0.6     | 1.3848 | 0.5167  | 0.5913 | 3.1    | 0.1433 | -0.7418 |
| 4/25/2019 1:53 | 0.6    | -0.45   | 1.2787 | 0.1667  | 0.5913 | 3.1    | 0.146  | -0.7418 |
| 4/25/2019 1:54 | 0.6    | -0.1833 | 1.3694 | -0.3083 | 0.5913 | 3.1    | 0.152  | -0.7418 |
| 4/25/2019 1:55 | 0.5167 | -0.05   | 1.2529 | 0.0667  | 0.5913 | 3.1    | 0.1394 | -0.7418 |
| 4/25/2019 1:56 | 0.5    | 0.5833  | 1.3704 | 0.6917  | 0.5913 | 3.1    | 0.146  | -0.7418 |
| 4/25/2019 1:57 | 0.5    | 0.3667  | 1.1324 | 0.175   | 0.5913 | 3.1    | 0.1418 | -0.7418 |
| 4/25/2019 1:58 | 0.5    | -0.0833 | 1.4126 | -0.0167 | 0.5913 | 3.1    | 0.1464 | -0.7418 |
| 4/25/2019 1:59 | 0.5    | 0.95    | 1.3138 | -0.4917 | 0.5913 | 3.1    | 0.1501 | -0.7418 |

|                |        |         |        |         |        |        |        |         |
|----------------|--------|---------|--------|---------|--------|--------|--------|---------|
| 4/25/2019 2:00 | 0.5833 | -0.1667 | 1.4219 | 0.0333  | 0.5913 | 3.11   | 0.1391 | -0.7418 |
| 4/25/2019 2:01 | 0.6333 | -0.6    | 1.5214 | 0.4583  | 0.5913 | 3.2    | 0.1514 | -0.7418 |
| 4/25/2019 2:02 | 0.7    | 0.7167  | 1.3862 | 0.6417  | 0.5913 | 3.19   | 0.1362 | -0.7418 |
| 4/25/2019 2:03 | 0.6917 | 1.2     | 1.3838 | 0.075   | 0.5913 | 3.1727 | 0.1409 | -0.7418 |
| 4/25/2019 2:04 | 0.6083 | -0.2667 | 1.593  | 0.1     | 0.5913 | 3.2    | 0.1446 | -0.7418 |
| 4/25/2019 2:05 | 0.6333 | -0.2    | 1.4373 | 0.075   | 0.5913 | 3.2    | 0.1394 | -0.7418 |
| 4/25/2019 2:06 | 0.6167 | 0.4167  | 1.3228 | -0.0833 | 0.5913 | 3.2    | 0.1491 | -0.7418 |
| 4/25/2019 2:07 | 0.6417 | 0.1     | 1.3303 | 0.075   | 0.5913 | 3.2    | 0.1393 | -0.7418 |
| 4/25/2019 2:08 | 0.65   | 0.3333  | 1.237  | -0.0833 | 0.5913 | 3.2    | 0.1493 | -0.7418 |
| 4/25/2019 2:09 | 0.6917 | -0.2333 | 1.4912 | 0.3917  | 0.5913 | 3.2    | 0.1483 | -0.7418 |
| 4/25/2019 2:10 | 0.6083 | 0.3167  | 1.4023 | -0.0833 | 0.5913 | 3.2    | 0.1374 | -0.7418 |
| 4/25/2019 2:11 | 0.6    | 0.6167  | 1.4758 | -0.4083 | 0.5913 | 3.2    | 0.1522 | -0.7418 |
| 4/25/2019 2:12 | 0.6    | -0.4667 | 1.0169 | 0.3667  | 0.5913 | 3.2    | 0.145  | -0.7418 |
| 4/25/2019 2:13 | 0.6    | 0.2167  | 1.0705 | -0.2583 | 0.5913 | 3.2    | 0.1486 | -0.7418 |
| 4/25/2019 2:14 | 0.6    | 0.35    | 1.374  | 0.3083  | 0.5913 | 3.2    | 0.151  | -0.7418 |
| 4/25/2019 2:15 | 0.6167 | 0.3833  | 1.2121 | -0.1333 | 0.5913 | 3.2727 | 0.1402 | -0.7418 |
| 4/25/2019 2:16 | 0.675  | -0.1    | 1.2962 | -0.1583 | 0.5913 | 3.2375 | 0.1537 | -0.7418 |
| 4/25/2019 2:17 | 0.6    | 0.3167  | 1.5545 | -0.6917 | 0.5913 | 3.3    | 0.141  | -0.7418 |
| 4/25/2019 2:18 | 0.6    | -0.3667 | 1.3678 | 0.3167  | 0.5913 | 3.3    | 0.1474 | -0.7418 |
| 4/25/2019 2:19 | 0.5917 | 0       | 1.3075 | -0.125  | 0.5913 | 3.3    | 0.1498 | -0.7418 |
| 4/25/2019 2:20 | 0.6    | -0.0333 | 1.1853 | -0.1    | 0.5913 | 3.3    | 0.1388 | -0.7418 |
| 4/25/2019 2:21 | 0.6    | -0.1333 | 1.5665 | -0.575  | 0.5913 | 3.3    | 0.156  | -0.7418 |
| 4/25/2019 2:22 | 0.6    | 0.3167  | 1.5577 | -0.1917 | 0.5913 | 3.3    | 0.1376 | -0.7418 |
| 4/25/2019 2:23 | 0.6    | -0.0167 | 1.1568 | -0.0083 | 0.5913 | 3.35   | 0.1436 | -0.7418 |
| 4/25/2019 2:24 | 0.6    | 0.15    | 1.5417 | -0.1    | 0.5913 | 3.4    | 0.1549 | -0.7418 |
| 4/25/2019 2:25 | 0.6    | 0.8333  | 1.246  | 0.1667  | 0.5913 | 3.4    | 0.1406 | -0.7418 |
| 4/25/2019 2:26 | 0.6    | 0.25    | 1.2155 | 0.125   | 0.5913 | 3.3364 | 0.1531 | -0.7418 |
| 4/25/2019 2:27 | 0.6    | 0.05    | 1.0616 | 0.175   | 0.5913 | 3.3    | 0.1406 | -0.7418 |
| 4/25/2019 2:28 | 0.5833 | -0.65   | 0.9484 | 0.3083  | 0.5913 | 3.3    | 0.1418 | -0.7418 |
| 4/25/2019 2:29 | 0.6    | -0.75   | 1.3846 | 0.2417  | 0.5913 | 3.3    | 0.1484 | -0.7418 |
| 4/25/2019 2:30 | 0.6    | -0.05   | 1.0505 | 0.4083  | 0.5913 | 3.3    | 0.1429 | -0.7418 |
| 4/25/2019 2:31 | 0.5083 | -0.05   | 1.5435 | -0.025  | 0.5913 | 3.3    | 0.157  | -0.7418 |
| 4/25/2019 2:32 | 0.4417 | 0.0167  | 1.3204 | -0.2083 | 0.5913 | 3.3    | 0.1469 | -0.7418 |
| 4/25/2019 2:33 | 0.375  | 0.1833  | 1.2077 | -0.3833 | 0.5913 | 3.31   | 0.1438 | -0.7418 |
| 4/25/2019 2:34 | 0.3167 | 0.7833  | 1.7503 | -0.1333 | 0.5913 | 3.69   | 0.1552 | -0.7418 |
| 4/25/2019 2:35 | 0.3667 | 0.2167  | 1.366  | -0.375  | 0.5913 | 3.9    | 0.1377 | -0.7418 |
| 4/25/2019 2:36 | 0.4    | -0.0167 | 1.19   | -0.2167 | 0.5913 | 3.9    | 0.1538 | -0.7418 |
| 4/25/2019 2:37 | 0.4    | 0.0833  | 1.4242 | 0.1583  | 0.5913 | 3.9    | 0.151  | -0.7418 |
| 4/25/2019 2:38 | 0.4    | 0.1333  | 1.5568 | -0.0583 | 0.5913 | 3.9    | 0.1451 | -0.7418 |
| 4/25/2019 2:39 | 0.3833 | 0.4167  | 0.9886 | -0.025  | 0.5913 | 3.9    | 0.1539 | -0.7418 |
| 4/25/2019 2:40 | 0.3417 | 0.85    | 1.338  | 0.0667  | 0.5913 | 3.9917 | 0.1363 | -0.7418 |
| 4/25/2019 2:41 | 0.3    | 0.1667  | 1.4413 | -0.3417 | 0.5913 | 4      | 0.1487 | -0.7418 |
| 4/25/2019 2:42 | 0.3    | -0.4833 | 1.2628 | 0.475   | 0.5913 | 4      | 0.1533 | -0.7418 |
| 4/25/2019 2:43 | 0.3    | 0.85    | 1.1767 | -0.1583 | 0.5913 | 4.0182 | 0.1452 | -0.7418 |
| 4/25/2019 2:44 | 0.3    | 0.1333  | 1.6512 | 0.0833  | 0.5913 | 4.1    | 0.1558 | -0.7418 |
| 4/25/2019 2:45 | 0.3    | 0.4833  | 1.3088 | -0.0417 | 0.5913 | 4.1    | 0.1421 | -0.7418 |
| 4/25/2019 2:46 | 0.2917 | 0.0833  | 1.0221 | -0.225  | 0.5913 | 3.8727 | 0.1509 | -0.7418 |



|                |        |         |        |         |        |        |        |         |
|----------------|--------|---------|--------|---------|--------|--------|--------|---------|
| 4/25/2019 2:47 | 0.2    | 0.0667  | 1.5147 | -0.4    | 0.5913 | 3.41   | 0.144  | -0.7418 |
| 4/25/2019 2:48 | 0.2    | -0.0667 | 1.1042 | -0.1333 | 0.5913 | 3.4111 | 0.1423 | -0.7418 |
| 4/25/2019 2:49 | 0.2    | 0.0667  | 1.4663 | 0.325   | 0.5913 | 3.42   | 0.1514 | -0.7418 |
| 4/25/2019 2:50 | 0.2    | 0.0667  | 1.0794 | -0.175  | 0.5913 | 3.4    | 0.14   | -0.7418 |
| 4/25/2019 2:51 | 0.2    | 0       | 1.2145 | -0.3    | 0.5913 | 3.4    | 0.152  | -0.7418 |
| 4/25/2019 2:52 | 0.2    | -0.3333 | 1.2075 | -0.0833 | 0.5913 | 3.3889 | 0.1504 | -0.7418 |
| 4/25/2019 2:53 | 0.2    | -0.15   | 0.9767 | -0.2417 | 0.5913 | 3.3    | 0.1406 | -0.7418 |
| 4/25/2019 2:54 | 0.2333 | -0.0167 | 1.2766 | 0.275   | 0.5913 | 3.3    | 0.1507 | -0.7418 |
| 4/25/2019 2:55 | 0.3    | -0.3167 | 1.1197 | 0.225   | 0.5913 | 3.3    | 0.1375 | -0.7418 |
| 4/25/2019 2:56 | 0.35   | 0.4167  | 0.8874 | -0.2917 | 0.5913 | 3.3818 | 0.1541 | -0.7418 |
| 4/25/2019 2:57 | 0.4    | -0.3833 | 1.4172 | 0.3167  | 0.5913 | 3.4    | 0.1513 | -0.7418 |
| 4/25/2019 2:58 | 0.4    | -0.3833 | 0.9223 | 0.3833  | 0.5913 | 3.4    | 0.1461 | -0.7418 |
| 4/25/2019 2:59 | 0.4    | 0.4167  | 1.2196 | 0.3583  | 0.5913 | 3.4    | 0.1548 | -0.7418 |
| 4/25/2019 3:00 | 0.4833 | -0.1333 | 1.3382 | 0.075   | 0.5913 | 3.4    | 0.1422 | -0.7418 |
| 4/25/2019 3:01 | 0.5    | -0.3333 | 1.435  | -0.0167 | 0.5913 | 3.4    | 0.1528 | -0.7418 |
| 4/25/2019 3:02 | 0.5    | 0.2833  | 1.2345 | -0.3083 | 0.5913 | 3.4    | 0.1518 | -0.7418 |
| 4/25/2019 3:03 | 0.5    | 0       | 1.383  | 0.4083  | 0.5913 | 3.4    | 0.1381 | -0.7418 |
| 4/25/2019 3:04 | 0.5    | 0.6667  | 1.4377 | -0.0333 | 0.5913 | 3.4    | 0.154  | -0.7418 |
| 4/25/2019 3:05 | 0.5    | 0.35    | 1.3126 | 0.05    | 0.5913 | 3.4    | 0.1437 | -0.7418 |
| 4/25/2019 3:06 | 0.5417 | -0.1667 | 1.3045 | -0.0667 | 0.5913 | 3.4364 | 0.1522 | -0.7418 |
| 4/25/2019 3:07 | 0.5    | 0.5     | 1.0685 | 0.1583  | 0.5913 | 3.5455 | 0.1526 | -0.7418 |
| 4/25/2019 3:08 | 0.4667 | 0.1     | 0.4665 | -0.4333 | 0.5913 | 3.6    | 0.1383 | -0.7418 |
| 4/25/2019 3:09 | 0.4    | -0.3333 | 0.8922 | -0.4583 | 0.5913 | 3.6    | 0.1542 | -0.7418 |
| 4/25/2019 3:10 | 0.325  | -0.6333 | 1.23   | -0.4917 | 0.5913 | 3.6273 | 0.1484 | -0.7418 |
| 4/25/2019 3:11 | 0.3    | -0.5    | 1.1535 | -0.0917 | 0.5913 | 3.69   | 0.1475 | -0.7418 |
| 4/25/2019 3:12 | 0.275  | -0.45   | 1.1695 | 0.1     | 0.5913 | 3.67   | 0.1611 | -0.7418 |
| 4/25/2019 3:13 | 0.2545 | -0.55   | 1.237  | -0.225  | 0.5913 | 3.725  | 0.1371 | -0.7418 |
| 4/25/2019 3:14 | 0.2083 | -0.25   | 0.9415 | -0.1917 | 0.5913 | 3.8    | 0.1518 | -0.7418 |
| 4/25/2019 3:15 | 0.2083 | -0.2167 | 1.1054 | -0.6333 | 0.5913 | 3.8    | 0.1476 | -0.7418 |
| 4/25/2019 3:16 | 0.2    | -0.45   | 0.9607 | -0.85   | 0.5913 | 3.8    | 0.1411 | -0.7418 |
| 4/25/2019 3:17 | 0.2    | 0.1167  | 1.2605 | -0.1833 | 0.5913 | 3.7727 | 0.1561 | -0.7418 |
| 4/25/2019 3:18 | 0.2    | 0.0333  | 1.2198 | -0.3417 | 0.5913 | 3.7    | 0.1422 | -0.7418 |
| 4/25/2019 3:19 | 0.2    | -0.3    | 1.0384 | -0.0333 | 0.5913 | 3.7    | 0.15   | -0.7418 |
| 4/25/2019 3:20 | 0.2    | -0.1167 | 0.9619 | -0.4917 | 0.5913 | 3.6083 | 0.1515 | -0.7418 |
| 4/25/2019 3:21 | 0.2    | -0.5167 | 0.9625 | 0.1083  | 0.5913 | 3.5667 | 0.144  | -0.7418 |
| 4/25/2019 3:22 | 0.3    | -0.1667 | 1.0729 | -0.0083 | 0.5913 | 3.5    | 0.1554 | -0.7418 |
| 4/25/2019 3:23 | 0.275  | -0.35   | 0.9679 | -0.3667 | 0.5913 | 3.5    | 0.1458 | -0.7418 |
| 4/25/2019 3:24 | 0.2917 | -0.4667 | 1.1599 | 0.1333  | 0.5913 | 3.5    | 0.1517 | -0.7418 |
| 4/25/2019 3:25 | 0.3    | -0.2333 | 0.8963 | -0.3417 | 0.5913 | 3.5    | 0.1544 | -0.7418 |
| 4/25/2019 3:26 | 0.2583 | 0.2     | 0.9168 | -0.15   | 0.5913 | 3.5    | 0.1462 | -0.7418 |
| 4/25/2019 3:27 | 0.225  | -0.7667 | 1.2507 | -0.0167 | 0.5913 | 3.5    | 0.1605 | -0.7418 |
| 4/25/2019 3:28 | 0.2    | -0.3    | 1.048  | -0.2417 | 0.5913 | 3.5    | 0.1424 | -0.7418 |
| 4/25/2019 3:29 | 0.2    | -0.2333 | 0.7038 | 0.1083  | 0.5913 | 3.5    | 0.1512 | -0.7418 |
| 4/25/2019 3:30 | 0.2083 | -0.8333 | 1.2868 | 0.1333  | 0.5913 | 3.5    | 0.1604 | -0.7418 |
| 4/25/2019 3:31 | 0.2083 | -0.8667 | 0.6324 | -0.3083 | 0.5913 | 3.5    | 0.1462 | -0.7418 |
| 4/25/2019 3:32 | 0.2583 | -0.4333 | 0.8905 | -0.675  | 0.5913 | 3.5091 | 0.1521 | -0.7418 |
| 4/25/2019 3:33 | 0.275  | -0.1167 | 1.2037 | -0.9417 | 0.5913 | 3.6636 | 0.1475 | -0.7418 |

|                |        |         |        |         |        |        |        |         |
|----------------|--------|---------|--------|---------|--------|--------|--------|---------|
| 4/25/2019 3:34 | 0.3    | -0.0833 | 0.7548 | -0.425  | 0.5913 | 4.1    | 0.1511 | -0.7418 |
| 4/25/2019 3:35 | 0.3    | -0.1    | 0.7649 | -0.55   | 0.5913 | 4.6    | 0.1528 | -0.7418 |
| 4/25/2019 3:36 | 0.3    | -0.8833 | 0.913  | -0.2    | 0.5913 | 5.45   | 0.1428 | -0.7418 |
| 4/25/2019 3:37 | 0.2583 | -0.5667 | 0.7256 | -0.3167 | 0.5913 | 5.8545 | 0.1593 | -0.7418 |
| 4/25/2019 3:38 | 0.2833 | -0.3333 | 0.7349 | 0.0583  | 0.5913 | 6.22   | 0.1444 | -0.7418 |
| 4/25/2019 3:39 | 0.3    | -0.25   | 1.1726 | 0.1083  | 0.5913 | 6.4    | 0.1529 | -0.7418 |
| 4/25/2019 3:40 | 0.3    | -0.2667 | 1.064  | -0.0917 | 0.5913 | 6.4    | 0.1581 | -0.7418 |
| 4/25/2019 3:41 | 0.2833 | 0.75    | 1.0888 | -0.275  | 0.5913 | 6.4    | 0.1435 | -0.7418 |
| 4/25/2019 3:42 | 0.2    | 0.0667  | 1.013  | -0.475  | 0.5913 | 6.4    | 0.1576 | -0.7418 |
| 4/25/2019 3:43 | 0.2    | 0.15    | 0.7769 | 0.05    | 0.5913 | 6.4    | 0.1464 | -0.7418 |
| 4/25/2019 3:44 | 0.2    | 0.0667  | 0.7948 | -0.425  | 0.5913 | 6.4    | 0.1535 | -0.7418 |
| 4/25/2019 3:45 | 0.2    | -0.7333 | 0.9955 | -0.825  | 0.5913 | 6.38   | 0.1565 | -0.7418 |
| 4/25/2019 3:46 | 0.2    | 0.4333  | 1.0645 | -0.1667 | 0.5913 | 6.0818 | 0.1441 | -0.7418 |
| 4/25/2019 3:47 | 0.1167 | -0.5333 | 0.8557 | 0.325   | 0.5913 | 5.59   | 0.1556 | -0.7418 |
| 4/25/2019 3:48 | 0.1833 | -0.1333 | 0.9565 | -0.15   | 0.5913 | 4.78   | 0.1528 | -0.7418 |
| 4/25/2019 3:49 | 0.2    | 0.3333  | 0.9638 | -0.15   | 0.5913 | 4.2182 | 0.1404 | -0.7418 |
| 4/25/2019 3:50 | 0.25   | 0.1833  | 0.8936 | -0.15   | 0.5913 | 3.85   | 0.1564 | -0.7418 |
| 4/25/2019 3:51 | 0.3    | -0.6    | 0.7104 | 0.2     | 0.5913 | 3.6182 | 0.1495 | -0.7418 |
| 4/25/2019 3:52 | 0.3    | -0.4167 | 1.0161 | -0.075  | 0.5913 | 3.6    | 0.153  | -0.7418 |
| 4/25/2019 3:53 | 0.3    | -0.2    | 1.0169 | -0.15   | 0.5913 | 3.6    | 0.1542 | -0.7418 |
| 4/25/2019 3:54 | 0.3667 | -0.3333 | 0.9185 | -0.1083 | 0.5913 | 3.6417 | 0.1405 | -0.7418 |
| 4/25/2019 3:55 | 0.4    | -0.15   | 0.8891 | -0.4083 | 0.5913 | 3.78   | 0.1591 | -0.7418 |
| 4/25/2019 3:56 | 0.4    | 0.0833  | 1.0628 | 0.0667  | 0.5913 | 3.7    | 0.1477 | -0.7418 |
| 4/25/2019 3:57 | 0.35   | 0.3333  | 0.8562 | -0.5583 | 0.5913 | 3.7    | 0.1566 | -0.7418 |
| 4/25/2019 3:58 | 0.325  | 0.0167  | 0.8635 | -0.5333 | 0.5913 | 3.7    | 0.1575 | -0.7418 |
| 4/25/2019 3:59 | 0.3083 | 0.1333  | 0.7738 | -0.3083 | 0.5913 | 3.7    | 0.1583 | -0.7418 |
| 4/25/2019 4:00 | 0.3583 | 0.3     | 1.0247 | -0.5083 | 0.5913 | 3.7455 | 0.1595 | -0.7418 |
| 4/25/2019 4:01 | 0.3    | 0.0667  | 0.8963 | -0.3667 | 0.5913 | 3.8    | 0.1456 | -0.7418 |
| 4/25/2019 4:02 | 0.3    | -0.4333 | 0.9881 | 0.1917  | 0.5913 | 3.8    | 0.1616 | -0.7418 |
| 4/25/2019 4:03 | 0.3    | -0.1167 | 0.7626 | 0.325   | 0.5913 | 3.96   | 0.1512 | -0.7418 |
| 4/25/2019 4:04 | 0.2167 | 0.05    | 0.9849 | 0.025   | 0.5913 | 4      | 0.15   | -0.7418 |
| 4/25/2019 4:05 | 0.2    | 0.4167  | 0.869  | -0.2667 | 0.5913 | 4.03   | 0.163  | -0.7418 |
| 4/25/2019 4:06 | 0.2    | -0.3333 | 0.9278 | -0.2    | 0.5913 | 4.1727 | 0.1463 | -0.7418 |
| 4/25/2019 4:07 | 0.2583 | -0.3833 | 0.9825 | -0.2917 | 0.5913 | 4.2636 | 0.1632 | -0.7418 |
| 4/25/2019 4:08 | 0.25   | -0.5667 | 1.3446 | -0.575  | 0.5913 | 4.46   | 0.1488 | -0.7418 |
| 4/25/2019 4:09 | 0.2    | 0.2167  | 0.654  | 0       | 0.5913 | 4.5    | 0.1504 | -0.7418 |
| 4/25/2019 4:10 | 0.2    | -0.3167 | 1.0008 | -0.2083 | 0.5913 | 4.5    | 0.1607 | -0.7418 |
| 4/25/2019 4:11 | 0.2    | 0.2833  | 0.8927 | -0.4667 | 0.5913 | 4.6091 | 0.1479 | -0.7418 |
| 4/25/2019 4:12 | 0.2    | 0.1     | 1.1634 | -0.2833 | 0.5913 | 4.675  | 0.1593 | -0.7418 |
| 4/25/2019 4:13 | 0.2    | -0.0333 | 0.7235 | -0.275  | 0.5913 | 4.6    | 0.1584 | -0.7418 |
| 4/25/2019 4:14 | 0.2    | 0.3167  | 0.722  | -0.4083 | 0.5913 | 4.6    | 0.1563 | -0.7418 |
| 4/25/2019 4:15 | 0.3    | -0.3667 | 0.7643 | -0.4417 | 0.5913 | 4.51   | 0.1587 | -0.7418 |
| 4/25/2019 4:16 | 0.3    | 0.25    | 0.8593 | -0.1583 | 0.5913 | 4.5091 | 0.1469 | -0.7418 |
| 4/25/2019 4:17 | 0.3417 | 0.3     | 1.1366 | -0.2333 | 0.5913 | 4.6    | 0.1555 | -0.7418 |
| 4/25/2019 4:18 | 0.4    | 0       | 1.0105 | -0.5583 | 0.5913 | 4.44   | 0.1569 | -0.7418 |
| 4/25/2019 4:19 | 0.4    | -0.1333 | 0.6078 | 0.0083  | 0.5913 | 4.2545 | 0.1515 | -0.7418 |
| 4/25/2019 4:20 | 0.4    | 0.3833  | 0.7247 | 0.15    | 0.5913 | 4.02   | 0.1614 | -0.7418 |

|                |        |         |        |         |        |        |        |         |
|----------------|--------|---------|--------|---------|--------|--------|--------|---------|
| 4/25/2019 4:21 | 0.4    | -0.1333 | 1.1489 | -0.05   | 0.5913 | 4.39   | 0.1434 | -0.7418 |
| 4/25/2019 4:22 | 0.4    | 0.0333  | 0.9756 | -0.0667 | 0.5913 | 4.6    | 0.1644 | -0.7418 |
| 4/25/2019 4:23 | 0.4    | 0.2833  | 0.6863 | -0.3    | 0.5913 | 4.5455 | 0.1563 | -0.7418 |
| 4/25/2019 4:24 | 0.4    | -0.4833 | 0.9554 | 0.0583  | 0.5913 | 4.4    | 0.1524 | -0.7418 |
| 4/25/2019 4:25 | 0.3667 | 0.4167  | 0.5712 | -1.0667 | 0.5913 | 4.4    | 0.1604 | -0.7418 |
| 4/25/2019 4:26 | 0.35   | -0.2167 | 0.7802 | -0.1    | 0.5913 | 4.4    | 0.1513 | -0.7418 |
| 4/25/2019 4:27 | 0.35   | -0.0167 | 0.6684 | -0.4667 | 0.5913 | 4.4091 | 0.1632 | -0.7418 |
| 4/25/2019 4:28 | 0.375  | -0.2167 | 1.329  | 0.0167  | 0.5913 | 4.4556 | 0.1523 | -0.7418 |
| 4/25/2019 4:29 | 0.325  | -0.05   | 0.9852 | -0.55   | 0.5913 | 4.3    | 0.1471 | -0.7418 |
| 4/25/2019 4:30 | 0.3    | -0.1167 | 0.9401 | -0.15   | 0.5913 | 4.3    | 0.1681 | -0.7418 |
| 4/25/2019 4:31 | 0.3    | -0.6    | 0.7082 | -0.2083 | 0.5913 | 4.3    | 0.1471 | -0.7418 |
| 4/25/2019 4:32 | 0.3    | 0.5833  | 1.0187 | -0.375  | 0.5913 | 4.3    | 0.1651 | -0.7418 |
| 4/25/2019 4:33 | 0.3    | -0.4    | 1.0784 | 0.1667  | 0.5913 | 4.03   | 0.1583 | -0.7418 |
| 4/25/2019 4:34 | 0.3    | -0.1167 | 0.6161 | -0.0917 | 0.5913 | 3.6444 | 0.1541 | -0.7418 |
| 4/25/2019 4:35 | 0.2583 | 0.25    | 1.0223 | -0.3    | 0.5913 | 3.6    | 0.1626 | -0.7418 |
| 4/25/2019 4:36 | 0.2417 | -0.3167 | 0.9433 | -0.45   | 0.5913 | 3.6    | 0.1535 | -0.7418 |
| 4/25/2019 4:37 | 0.2    | 0.15    | 0.9902 | 0.4583  | 0.5913 | 3.675  | 0.1587 | -0.7418 |
| 4/25/2019 4:38 | 0.2    | 0.35    | 0.911  | -0.4083 | 0.5913 | 3.7    | 0.1599 | -0.7418 |
| 4/25/2019 4:39 | 0.2    | 0.1     | 0.6254 | -0.3167 | 0.5913 | 3.7    | 0.1479 | -0.7418 |
| 4/25/2019 4:40 | 0.2    | -0.1167 | 0.8305 | -0.5583 | 0.5913 | 3.7    | 0.1618 | -0.7418 |
| 4/25/2019 4:41 | 0.2    | 0.05    | 0.8744 | 0.2917  | 0.5913 | 3.7    | 0.1509 | -0.7418 |
| 4/25/2019 4:42 | 0.2    | 0.65    | 0.8907 | -0.6667 | 0.5913 | 3.71   | 0.1543 | -0.7418 |
| 4/25/2019 4:43 | 0.2    | -0.5333 | 0.6188 | -0.4333 | 0.5913 | 3.775  | 0.159  | -0.7418 |
| 4/25/2019 4:44 | 0.2    | -0.25   | 0.3133 | -0.0667 | 0.5913 | 3.9083 | 0.1498 | -0.7418 |
| 4/25/2019 4:45 | 0.2    | -0.6667 | 1.1768 | -0.425  | 0.5913 | 4.7    | 0.1607 | -0.7418 |
| 4/25/2019 4:46 | 0.2    | -0.4833 | 0.77   | -0.35   | 0.5913 | 5.3182 | 0.1624 | -0.7418 |
| 4/25/2019 4:47 | 0.1333 | -0.1833 | 0.912  | -0.6667 | 0.5913 | 5.9818 | 0.1442 | -0.7418 |
| 4/25/2019 4:48 | 0.1    | -0.3833 | 0.4519 | -0.4083 | 0.5913 | 6.2    | 0.1618 | -0.7418 |
| 4/25/2019 4:49 | 0.1    | 0.9     | 1.0043 | -0.6417 | 0.5913 | 6.2636 | 0.1475 | -0.7418 |
| 4/25/2019 4:50 | 0.1    | 0.0667  | 0.7847 | -1.0167 | 0.5913 | 6.275  | 0.1528 | -0.7418 |
| 4/25/2019 4:51 | 0.025  | -0.75   | 0.7647 | -0.4917 | 0.5913 | 6.3667 | 0.1578 | -0.7418 |
| 4/25/2019 4:52 | 0      | -0.35   | 0.9365 | 0.1917  | 0.5913 | 6.4    | 0.1433 | -0.7418 |
| 4/25/2019 4:53 | 0      | -0.6667 | 1.1107 | -0.2833 | 0.5913 | 6.4    | 0.1537 | -0.7418 |
| 4/25/2019 4:54 | 0.0417 | -0.1167 | 0.5126 | -0.3667 | 0.5913 | 6.4    | 0.1526 | -0.7418 |
| 4/25/2019 4:55 | 0.0833 | -0.15   | 0.646  | -0.3583 | 0.5913 | 6.4    | 0.1579 | -0.7418 |
| 4/25/2019 4:56 | 0.0083 | 0.05    | 0.6318 | -0.675  | 0.5913 | 6.3727 | 0.1636 | -0.7418 |
| 4/25/2019 4:57 | 0.0667 | -0.55   | 0.7691 | 0       | 0.5913 | 5.6091 | 0.1445 | -0.7418 |
| 4/25/2019 4:58 | 0.1    | -0.2167 | 0.6025 | -0.1917 | 0.5913 | 5      | 0.1559 | -0.7418 |
| 4/25/2019 4:59 | 0.1    | -0.45   | 0.4996 | -0.1167 | 0.5913 | 4.3    | 0.1619 | -0.7418 |
| 4/25/2019 5:00 | 0.0917 | -0.35   | 0.6894 | -0.2917 | 0.5913 | 3.9    | 0.1458 | -0.7418 |
| 4/25/2019 5:01 | 0.0583 | -0.0333 | 0.743  | -0.2583 | 0.5913 | 3.9    | 0.1634 | -0.7418 |
| 4/25/2019 5:02 | 0.025  | -0.6    | 0.8764 | -0.65   | 0.5913 | 3.9    | 0.153  | -0.7418 |
| 4/25/2019 5:03 | 0.0167 | -0.6    | 0.6453 | -0.2333 | 0.5913 | 3.8182 | 0.1476 | -0.7418 |
| 4/25/2019 5:04 | 0.0667 | 0.2833  | 0.831  | -0.2417 | 0.5913 | 3.7818 | 0.1577 | -0.7418 |
| 4/25/2019 5:05 | 0.1    | -0.15   | 0.3018 | -0.35   | 0.5913 | 3.8    | 0.1449 | -0.7418 |
| 4/25/2019 5:06 | 0.1    | -0.5167 | 0.8901 | 0.2667  | 0.5913 | 3.77   | 0.1582 | -0.7418 |
| 4/25/2019 5:07 | 0.1    | -0.0833 | 1.1852 | -0.15   | 0.5913 | 3.8    | 0.1523 | -0.7418 |

|                |         |         |        |         |        |        |        |         |
|----------------|---------|---------|--------|---------|--------|--------|--------|---------|
| 4/25/2019 5:08 | 0.1     | -0.3667 | 0.6679 | -0.1417 | 0.5913 | 3.8    | 0.1431 | -0.7418 |
| 4/25/2019 5:09 | 0.1     | -0.4333 | 0.7545 | -0.25   | 0.5913 | 4.1556 | 0.1527 | -0.7418 |
| 4/25/2019 5:10 | 0.1     | -0.1833 | 0.459  | -0.8667 | 0.5913 | 4.7    | 0.1352 | -0.7418 |
| 4/25/2019 5:11 | 0.1     | -0.2833 | 0.826  | -0.425  | 0.5913 | 4.7364 | 0.1498 | -0.7418 |
| 4/25/2019 5:12 | 0.0833  | -0.6833 | 0.7357 | -0.3667 | 0.5913 | 4.8    | 0.1528 | -0.7418 |
| 4/25/2019 5:13 | 0       | -0.7667 | 0.7602 | -0.2917 | 0.5913 | 4.8    | 0.144  | -0.7418 |
| 4/25/2019 5:14 | 0       | -0.1667 | 0.1347 | -0.2083 | 0.5913 | 4.8    | 0.154  | -0.7418 |
| 4/25/2019 5:15 | 0       | -0.9167 | 0.6561 | -0.6    | 0.5913 | 4.8    | 0.1455 | -0.7418 |
| 4/25/2019 5:16 | 0       | -0.6167 | 0.7904 | -1.1083 | 0.5913 | 4.8    | 0.1449 | -0.7418 |
| 4/25/2019 5:17 | 0       | -0.1    | 0.6427 | -0.4667 | 0.5913 | 4.82   | 0.1547 | -0.7418 |
| 4/25/2019 5:18 | -0.075  | -0.35   | 0.4738 | -0.425  | 0.5913 | 5.08   | 0.1383 | -0.7418 |
| 4/25/2019 5:19 | -0.0833 | -0.6333 | 0.6608 | -0.075  | 0.5913 | 5.1    | 0.1486 | -0.7418 |
| 4/25/2019 5:20 | -0.0083 | -0.8    | 0.8917 | -0.1167 | 0.5913 | 5.1    | 0.1534 | -0.7418 |
| 4/25/2019 5:21 | 0       | -0.5167 | 0.5714 | -0.25   | 0.5913 | 4.8818 | 0.1418 | -0.7418 |
| 4/25/2019 5:22 | 0       | -0.1333 | 0.8208 | -0.05   | 0.5913 | 4.31   | 0.1511 | -0.7418 |
| 4/25/2019 5:23 | 0       | -0.5833 | 0.6851 | -0.0583 | 0.5913 | 4.2    | 0.1489 | -0.7418 |
| 4/25/2019 5:24 | 0       | -0.4    | 0.4113 | 0.3917  | 0.5913 | 4.3    | 0.1408 | -0.7418 |
| 4/25/2019 5:25 | -0.0083 | -1.6667 | 0.2349 | -0.2083 | 0.5913 | 4.3364 | 0.1496 | -0.7418 |
| 4/25/2019 5:26 | -0.025  | -0.5833 | 0.8506 | -0.0333 | 0.5913 | 4.6273 | 0.1431 | -0.7418 |
| 4/25/2019 5:27 | 0       | -0.3    | 0.539  | -0.2    | 0.5913 | 4.7    | 0.1446 | -0.7418 |
| 4/25/2019 5:28 | 0.025   | 0.05    | 0.9287 | 0.1333  | 0.5913 | 4.75   | 0.1473 | -0.7418 |
| 4/25/2019 5:29 | 0.0917  | -0.8333 | 0.805  | -0.5083 | 0.5913 | 5.3455 | 0.1376 | -0.7418 |
| 4/25/2019 5:30 | 0.0167  | -0.4667 | 0.8549 | -0.4583 | 0.5913 | 5.2    | 0.1487 | -0.7418 |
| 4/25/2019 5:31 | 0       | -0.4833 | 0.5906 | -0.0833 | 0.5913 | 5.1    | 0.1477 | -0.7418 |
| 4/25/2019 5:32 | 0       | 0.1667  | 0.9184 | -0.4167 | 0.5913 | 5.1    | 0.1353 | -0.7418 |
| 4/25/2019 5:33 | 0       | -0.1667 | 0.4165 | -0.725  | 0.5913 | 5.1    | 0.1471 | -0.7418 |
| 4/25/2019 5:34 | 0.0333  | -0.1333 | 1.1279 | -0.55   | 0.5913 | 5.1    | 0.1436 | -0.7418 |
| 4/25/2019 5:35 | 0.1     | 0       | 0.953  | -0.325  | 0.5913 | 5.1    | 0.1473 | -0.7418 |
| 4/25/2019 5:36 | 0.1583  | -0.05   | 0.641  | -0.5167 | 0.5913 | 5.1    | 0.148  | -0.7418 |
| 4/25/2019 5:37 | 0.2167  | -0.35   | 1.1253 | -0.1833 | 0.5913 | 5.0833 | 0.1434 | -0.7418 |
| 4/25/2019 5:38 | 0.3     | -0.4833 | 0.8511 | 0.0583  | 0.5913 | 4.8    | 0.15   | -0.7418 |
| 4/25/2019 5:39 | 0.325   | -0.8333 | 1.144  | -0.075  | 0.5913 | 4.7    | 0.1526 | -0.7418 |
| 4/25/2019 5:40 | 0.3333  | 0.2167  | 0.8118 | -0.2    | 0.5913 | 4.7545 | 0.138  | -0.7418 |
| 4/25/2019 5:41 | 0.325   | 0.3167  | 0.6402 | -0.6    | 0.5913 | 4.18   | 0.1551 | -0.7418 |
| 4/25/2019 5:42 | 0.3     | -0.7    | 0.6166 | -0.525  | 0.5913 | 4      | 0.1487 | -0.7418 |
| 4/25/2019 5:43 | 0.3     | -0.4667 | 0.9363 | 0.0333  | 0.5913 | 4.34   | 0.1484 | -0.7418 |
| 4/25/2019 5:44 | 0.325   | -0.25   | 0.8821 | -0.5667 | 0.5913 | 5.0727 | 0.1499 | -0.7418 |
| 4/25/2019 5:45 | 0.3167  | 0.1667  | 0.6806 | -0.3917 | 0.5913 | 5.76   | 0.1325 | -0.7418 |
| 4/25/2019 5:46 | 0.3     | -0.2667 | 0.9343 | -0.0083 | 0.5913 | 6.0818 | 0.1438 | -0.7418 |
| 4/25/2019 5:47 | 0.2417  | 0.75    | 0.1945 | -0.3083 | 0.5913 | 6.2583 | 0.1572 | -0.7418 |
| 4/25/2019 5:48 | 0.25    | -0.0833 | 0.9479 | -0.225  | 0.5913 | 6.54   | 0.1451 | -0.7418 |
| 4/25/2019 5:49 | 0.2417  | -0.1    | 0.8758 | -0.2833 | 0.5913 | 6.8    | 0.1526 | -0.7418 |
| 4/25/2019 5:50 | 0.2167  | -0.0833 | 0.8907 | -0.725  | 0.5913 | 6.8    | 0.1497 | -0.7418 |
| 4/25/2019 5:51 | 0.2     | -0.45   | 0.9356 | -0.5167 | 0.5913 | 6.8091 | 0.1487 | -0.7418 |
| 4/25/2019 5:52 | 0.2     | 0.0833  | 1.1312 | -0.5333 | 0.5913 | 6.8091 | 0.1605 | -0.7418 |
| 4/25/2019 5:53 | 0.2     | -0.1333 | 0.8541 | -0.1667 | 0.5913 | 6.8545 | 0.1453 | -0.7418 |
| 4/25/2019 5:54 | 0.2     | -0.3333 | 1.0316 | -0.175  | 0.5913 | 7.5455 | 0.1536 | -0.7418 |

|                |        |         |        |         |        |         |        |         |
|----------------|--------|---------|--------|---------|--------|---------|--------|---------|
| 4/25/2019 5:55 | 0.2    | -0.6    | 1.0471 | -0.4167 | 0.5913 | 7.8083  | 0.1669 | -0.7418 |
| 4/25/2019 5:56 | 0.1917 | -0.4167 | 0.9868 | -0.475  | 0.5913 | 7.35    | 0.1526 | -0.7418 |
| 4/25/2019 5:57 | 0.2    | -0.3    | 1.0256 | 0.0583  | 0.5913 | 7.1667  | 0.1572 | -0.7418 |
| 4/25/2019 5:58 | 0.2    | -0.3833 | 0.9164 | -0.475  | 0.5913 | 7.31    | 0.1571 | -0.7418 |
| 4/25/2019 5:59 | 0.2083 | -0.15   | 1.0822 | -0.5583 | 0.5913 | 7.3818  | 0.145  | -0.7418 |
| 4/25/2019 6:00 | 0.2    | 0.3     | 0.62   | -0.5417 | 0.5913 | 7.55    | 0.153  | -0.7418 |
| 4/25/2019 6:01 | 0.25   | 0.25    | 0.7375 | -0.925  | 0.5913 | 7.5818  | 0.1585 | -0.7418 |
| 4/25/2019 6:02 | 0.3    | -0.4833 | 0.7344 | -0.6417 | 0.5913 | 8.4182  | 0.1576 | -0.7418 |
| 4/25/2019 6:03 | 0.3    | 0.8667  | 0.9341 | -0.45   | 0.5913 | 9.6417  | 0.1607 | -0.7418 |
| 4/25/2019 6:04 | 0.2833 | -0.3333 | 1.1778 | -0.3833 | 0.5913 | 10.71   | 0.1484 | -0.7418 |
| 4/25/2019 6:05 | 0.2083 | -0.3167 | 0.2528 | -0.9833 | 0.5913 | 11.4917 | 0.1666 | -0.7418 |
| 4/25/2019 6:06 | 0.2083 | -0.2667 | 0.8647 | -0.6417 | 0.5913 | 11.3364 | 0.1629 | -0.7418 |
| 4/25/2019 6:07 | 0.2    | -0.0667 | 0.8344 | 0.275   | 0.5913 | 11.2    | 0.1568 | -0.7418 |
| 4/25/2019 6:08 | 0.2    | -0.3167 | 0.9948 | 0.175   | 0.5913 | 11.6727 | 0.1641 | -0.7418 |
| 4/25/2019 6:09 | 0.2    | -0.6833 | 0.9213 | -0.075  | 0.5913 | 11.4833 | 0.1693 | -0.7418 |
| 4/25/2019 6:10 | 0.225  | 0.4333  | 1.1945 | -0.1083 | 0.5913 | 11.5    | 0.1627 | -0.7418 |
| 4/25/2019 6:11 | 0.2    | -0.4333 | 0.6889 | -0.075  | 0.5913 | 11.8583 | 0.1705 | -0.7418 |
| 4/25/2019 6:12 | 0.2    | -0.0333 | 0.9885 | -0.5167 | 0.5913 | 12.19   | 0.1631 | -0.7418 |
| 4/25/2019 6:13 | 0.1667 | 0.0667  | 0.9075 | -0.3917 | 0.5913 | 12.42   | 0.1648 | -0.7418 |
| 4/25/2019 6:14 | 0.1167 | 0.1167  | 0.7569 | 0.1     | 0.5913 | 12.09   | 0.1728 | -0.7418 |
| 4/25/2019 6:15 | 0.175  | -0.7333 | 1.1824 | -0.5667 | 0.5913 | 11.15   | 0.151  | -0.7418 |
| 4/25/2019 6:16 | 0.2    | 0.0667  | 0.4816 | -0.1333 | 0.5913 | 10.43   | 0.1654 | -0.7418 |
| 4/25/2019 6:17 | 0.15   | -0.7167 | 0.5905 | -0.0417 | 0.5913 | 10.02   | 0.1626 | -0.7418 |
| 4/25/2019 6:18 | 0.0583 | -0.3833 | 0.9117 | -0.6083 | 0.5913 | 9.8182  | 0.1636 | -0.7418 |
| 4/25/2019 6:19 | 0.0667 | 0.0167  | 1.0536 | -0.125  | 0.5913 | 9.87    | 0.1745 | -0.7418 |
| 4/25/2019 6:20 | 0.1    | 0.15    | 0.7003 | 0.0417  | 0.5913 | 9.7833  | 0.1612 | -0.7418 |
| 4/25/2019 6:21 | 0.1    | -0.0667 | 0.9573 | 0.3167  | 0.5913 | 9.44    | 0.172  | -0.7418 |
| 4/25/2019 6:22 | 0.1    | -0.6167 | 1.1319 | 0.0417  | 0.5913 | 9.3     | 0.165  | -0.7418 |
| 4/25/2019 6:23 | 0.1    | -0.9667 | 0.9216 | 0.25    | 0.5913 | 8.83    | 0.1662 | -0.7418 |
| 4/25/2019 6:24 | 0.1    | -0.05   | 1.1888 | -0.3083 | 0.5913 | 8.4727  | 0.1765 | -0.7418 |
| 4/25/2019 6:25 | 0.1    | 0.45    | 1.1284 | -0.1667 | 0.5913 | 7.82    | 0.1635 | -0.7418 |
| 4/25/2019 6:26 | 0.2    | 0.15    | 0.4574 | -0.675  | 0.5913 | 7.8273  | 0.1617 | -0.7418 |
| 4/25/2019 6:27 | 0.2    | -1.05   | 0.8918 | -0.625  | 0.5913 | 7.61    | 0.1646 | -0.7418 |
| 4/25/2019 6:28 | 0.2583 | 0.3333  | 0.7797 | -0.5917 | 0.5913 | 7.275   | 0.1548 | -0.7418 |
| 4/25/2019 6:29 | 0.3    | -0.5    | 0.9749 | -0.0667 | 0.5913 | 6.62    | 0.1668 | -0.7418 |
| 4/25/2019 6:30 | 0.3    | -0.2167 | 0.9117 | 0.15    | 0.5913 | 6.5364  | 0.1675 | -0.7418 |
| 4/25/2019 6:31 | 0.3333 | -0.3    | 0.9381 | 0.0167  | 0.5913 | 6.7727  | 0.1561 | -0.7418 |
| 4/25/2019 6:32 | 0.325  | -0.35   | 0.8075 | -0.3833 | 0.5913 | 6.84    | 0.1708 | -0.7418 |
| 4/25/2019 6:33 | 0.3583 | -0.8    | 1.0611 | 0.0667  | 0.5913 | 7.6167  | 0.1556 | -0.7418 |
| 4/25/2019 6:34 | 0.3083 | -0.55   | 1.1702 | -0.4083 | 0.5913 | 7.8545  | 0.1643 | -0.7418 |
| 4/25/2019 6:35 | 0.3917 | -0.3167 | 0.903  | -0.0083 | 0.5913 | 8.7364  | 0.1649 | -0.7418 |
| 4/25/2019 6:36 | 0.4    | 0.2333  | 1.0726 | 0.2     | 0.5913 | 9.2273  | 0.1614 | -0.7418 |
| 4/25/2019 6:37 | 0.4    | 0.5667  | 0.8988 | 0.0917  | 0.5913 | 9.77    | 0.1707 | -0.7418 |
| 4/25/2019 6:38 | 0.4    | -0.3167 | 0.7721 | 0.1833  | 0.5913 | 9.7818  | 0.1636 | -0.7418 |
| 4/25/2019 6:39 | 0.4    | 0.1333  | 1.0092 | 0.4917  | 0.5913 | 10.625  | 0.1587 | -0.7418 |
| 4/25/2019 6:40 | 0.4    | 0.9333  | 1.1218 | 0.025   | 0.5913 | 11.4083 | 0.1682 | -0.7418 |
| 4/25/2019 6:41 | 0.4    | 0.2333  | 0.6156 | -0.25   | 0.5913 | 11.6636 | 0.1538 | -0.7418 |

|                |         |         |         |         |        |          |        |         |
|----------------|---------|---------|---------|---------|--------|----------|--------|---------|
| 4/25/2019 6:42 | 0.4     | -0.15   | 1.0926  | -0.75   | 0.5913 | 11.975   | 0.1612 | -0.7418 |
| 4/25/2019 6:43 | 0.3273  | -0.5667 | 0.5463  | 0.3333  | 0.5913 | 11.725   | 0.1598 | -0.7418 |
| 4/25/2019 6:44 | 0.3083  | -0.1667 | 0.9074  | 0.65    | 0.5913 | 11.5417  | 0.1517 | -0.7418 |
| 4/25/2019 6:45 | 0.3     | -0.35   | 0.9324  | 0.1333  | 0.5913 | 11       | 0.1652 | -0.7418 |
| 4/25/2019 6:46 | 0.4     | 0.15    | 0.836   | 0.2917  | 0.5913 | 10.525   | 0.1595 | -0.7418 |
| 4/25/2019 6:47 | 0.4     | 0.2333  | 1.1956  | 0.2333  | 0.5913 | 9.9455   | 0.1531 | -0.7418 |
| 4/25/2019 6:48 | 0.4     | -0.3667 | 0.9604  | 0.0917  | 0.5913 | 9.65     | 0.167  | -0.7418 |
| 4/25/2019 6:49 | 0.4     | 0.2     | 1.0479  | 0.1667  | 0.5913 | 9.1818   | 0.1534 | -0.7418 |
| 4/25/2019 6:50 | 0.4583  | 0.0667  | 2.0063  | 0.0333  | 0.5913 | 9.6667   | 0.1622 | -0.7418 |
| 4/25/2019 6:51 | 0.6     | 1.05    | 0.46    | 0.3167  | 0.5913 | 9.2833   | 0.1694 | -0.7418 |
| 4/25/2019 6:52 | 0.7333  | 0.8     | 1.3989  | 0.4417  | 0.5913 | 8.3833   | 0.1498 | -0.7418 |
| 4/25/2019 6:53 | 0.8417  | 0.8667  | 1.5286  | 0.8583  | 0.5913 | 8.0727   | 0.1632 | -0.7418 |
| 4/25/2019 6:54 | 0.9     | 0.3     | 1.591   | 0.5167  | 0.5913 | 7.5583   | 0.1676 | -0.7418 |
| 4/25/2019 6:55 | 0.9     | -0.05   | 0.9402  | 1.2667  | 0.5913 | 7.4091   | 0.1606 | -0.7418 |
| 4/25/2019 6:56 | 0.9     | 0.1667  | 1.2805  | 0.0667  | 0.5913 | 6.9917   | 0.1648 | -0.7418 |
| 4/25/2019 6:57 | 0.9917  | 0.8     | 1.6314  | 0.3917  | 0.5913 | 6.8167   | 0.1654 | -0.7418 |
| 4/25/2019 6:58 | 1       | 0.3     | 1.8629  | 0.3583  | 0.5913 | 7.64     | 0.1688 | -0.7418 |
| 4/25/2019 6:59 | 0.8917  | 0.1833  | 1.1858  | 0.4333  | 0.5913 | 8.4727   | 0.1735 | -0.7418 |
| 4/25/2019 7:00 | 0.6833  | -0.0667 | 1.434   | 0.525   | 0.5913 | 12.9636  | 0.1904 | -0.7418 |
| 4/25/2019 7:01 | 0.5167  | 0       | 3.3496  | -0.2417 | 0.5913 | 46.95    | 0.333  | -0.7418 |
| 4/25/2019 7:02 | 0.4     | -0.5    | 12.3338 | 0.5583  | 0.5913 | 76.8182  | 0.6386 | -0.7418 |
| 4/25/2019 7:03 | 0.2917  | 0.3667  | 23.72   | 1.0917  | 0.5913 | 111.3667 | 1.2598 | -0.7418 |
| 4/25/2019 7:04 | 0.1667  | -0.3333 | 24.825  | 0.975   | 0.5913 | 127.4727 | 1.6283 | -0.7418 |
| 4/25/2019 7:05 | 0.1     | -0.6333 | 19.2933 | -0.5667 | 0.5913 | 104.15   | 1.5272 | -0.7418 |
| 4/25/2019 7:06 | 0.1     | 0.3667  | 14.1525 | 0.35    | 0.5913 | 85.6727  | 1.6315 | -0.7418 |
| 4/25/2019 7:07 | 0.0917  | -0.4    | 12.5508 | 0.7667  | 0.5913 | 91.5909  | 1.6681 | -0.7418 |
| 4/25/2019 7:08 | 0.0667  | -1.45   | 14.8475 | 0.05    | 0.5913 | 80.8182  | 1.6508 | -0.7418 |
| 4/25/2019 7:09 | 0       | -0.25   | 13.0267 | -0.35   | 0.5913 | 71.325   | 1.6001 | -0.7418 |
| 4/25/2019 7:10 | 0       |         | 12.9683 | -0.5333 | 0.5913 | 73.8     | 1.7017 | -0.7418 |
| 4/25/2019 7:11 | -0.0167 | -0.7667 | 15.0283 | 0.025   | 0.5913 | 102.9583 | 1.6503 | -0.7418 |
| 4/25/2019 7:12 | -0.025  | -0.75   | 14.2925 | 0.3667  | 0.5913 | 91.7455  | 1.7345 | -0.7418 |
| 4/25/2019 7:13 | -0.0455 | 0.0333  | 13.4492 | 0.225   | 0.5913 | 87.3333  | 1.59   | -0.7418 |
| 4/25/2019 7:14 | -0.0917 |         | 14.3608 | -0.1417 | 0.5913 | 87       | 1.6663 | -0.7418 |
| 4/25/2019 7:15 | -0.1    |         | 13.1467 | -0.0583 | 0.5913 | 85.7364  | 1.5696 | -0.7418 |
| 4/25/2019 7:16 | -0.1    |         | 13.6058 | -0.9667 | 0.5913 | 85.4333  | 1.606  | -0.7418 |
| 4/25/2019 7:17 | -0.0917 |         | 13.4242 | -0.375  | 0.5913 | 86.5455  | 1.6207 | -0.7418 |
| 4/25/2019 7:18 | -0.0333 |         | 12.9358 | -0.2333 | 0.5913 | 88.0091  | 1.6654 | -0.7418 |
| 4/25/2019 7:19 | -0.025  |         | 14.3317 | -0.2583 | 0.5913 | 88.5667  | 1.6738 | -0.7418 |
| 4/25/2019 7:20 | -0.0333 | -0.23   | 13.8925 | -0.2917 | 0.5913 | 88.3727  | 1.6403 | -0.7418 |
| 4/25/2019 7:21 | 0       | -0.875  | 12.7742 | -0.0833 | 0.5913 | 87.6091  | 1.6355 | -0.7418 |
| 4/25/2019 7:22 | 0       |         | 12.4725 | -0.2417 | 0.5913 | 85.8     | 1.591  | -0.7418 |
| 4/25/2019 7:23 | 0.0083  |         | 12.19   | -0.2417 | 0.5913 | 83.8     | 1.5877 | -0.7418 |
| 4/25/2019 7:24 | 0.0917  |         | 12.7442 | 0.0833  | 0.5913 | 81.78    | 1.6133 | -0.7418 |
| 4/25/2019 7:25 | 0.1     |         | 12.4317 | -0.575  | 0.5913 | 79.88    | 1.5923 | -0.7418 |
| 4/25/2019 7:26 | 0.1417  |         | 11.9492 | -0.3    | 0.5913 | 77.8667  | 1.5853 | -0.7418 |
| 4/25/2019 7:27 | 0.2     |         | 11.5633 | -0.5083 | 0.5913 | 76.975   | 1.5563 | -0.7418 |
| 4/25/2019 7:28 | 0.15    |         | 11.0283 | 0.1667  | 0.5913 | 75.5455  | 1.5606 | -0.7418 |

|                |         |         |         |         |        |         |        |         |
|----------------|---------|---------|---------|---------|--------|---------|--------|---------|
| 4/25/2019 7:29 | 0.125   |         | 10.8283 | 0.2083  | 0.5913 | 72.3    | 1.5373 | -0.7418 |
| 4/25/2019 7:30 | 0.1     |         | 10.7083 | -0.4167 | 0.5913 | 68.8667 | 1.5223 | -0.7418 |
| 4/25/2019 7:31 | 0.1     |         | 10.6664 | 0.0417  | 0.5913 | 65.7083 | 1.5414 | -0.7418 |
| 4/25/2019 7:32 | 0.1     |         | 10.0739 | -0.5417 | 0.5913 | 63.5455 | 1.5059 | -0.7418 |
| 4/25/2019 7:33 | 0.1     |         | 10.701  | -0.6417 | 0.5913 | 61.3083 | 1.4945 | -0.7418 |
| 4/25/2019 7:34 | 0.1     |         | 9.5747  | -0.2583 | 0.5913 | 60.5636 | 1.4992 | -0.7418 |
| 4/25/2019 7:35 | 0.1     |         | 9.529   | -0.425  | 0.5913 | 60.1273 | 1.4697 | -0.7418 |
| 4/25/2019 7:36 | 0.1     |         | 9.9224  | -0.2417 | 0.5913 | 59.7333 | 1.4875 | -0.7418 |
| 4/25/2019 7:37 | 0.1     |         | 9.5471  | 0.3083  | 0.5913 | 59.2546 | 1.4738 | -0.7418 |
| 4/25/2019 7:38 | 0.1     |         | 8.9151  | -0.25   | 0.5913 | 58.8167 | 1.461  | -0.7418 |
| 4/25/2019 7:39 | 0.0583  |         | 8.8212  | -0.0583 | 0.5913 | 58.25   | 1.4613 | -0.7418 |
| 4/25/2019 7:40 | 0       |         | 9.0389  | -0.85   | 0.5913 | 57.83   | 1.4428 | -0.7418 |
| 4/25/2019 7:41 | 0       | -0.05   | 8.5435  | -0.4833 | 0.5913 | 58.08   | 1.4232 | -0.7418 |
| 4/25/2019 7:42 | 0       | -0.2857 | 8.6777  | -0.5917 | 0.5913 | 58.9636 | 1.4287 | -0.7418 |
| 4/25/2019 7:43 | 0       | 0.1     | 8.5954  | -0.6167 | 0.5913 | 60.9917 | 1.4162 | -0.7418 |
| 4/25/2019 7:44 | 0       | -1.6727 | 8.5045  | 0.4083  | 0.5913 | 62.3273 | 1.405  | -0.7418 |
| 4/25/2019 7:45 | 0.075   | -0.7417 | 8.4229  | -0.0917 | 0.5913 | 63.45   | 1.4092 | -0.7418 |
| 4/25/2019 7:46 | 0.0667  | -0.65   | 8.2328  | -0.5167 | 0.5913 | 64.8417 | 1.3812 | -0.7418 |
| 4/25/2019 7:47 | 0.025   | -0.9    | 7.9948  | -0.1583 | 0.5913 | 67.0091 | 1.3888 | -0.7418 |
| 4/25/2019 7:48 | 0       | -0.2667 | 8.1894  | 0.0083  | 0.5913 | 68.7091 | 1.3617 | -0.7418 |
| 4/25/2019 7:49 | 0       | -0.3583 | 7.6482  | -0.3083 | 0.5913 | 70.2182 | 1.3532 | -0.7418 |
| 4/25/2019 7:50 | 0       | -0.3333 | 7.1427  | 0       | 0.5913 | 71.0167 | 1.353  | -0.7418 |
| 4/25/2019 7:51 | 0.0917  | -0.225  | 7.3712  | -0.1167 | 0.5913 | 70.6182 | 1.3382 | -0.7418 |
| 4/25/2019 7:52 | 0.1     | -0.4167 | 6.9523  | -0.1667 | 0.5913 | 70.2167 | 1.3317 | -0.7418 |
| 4/25/2019 7:53 | 0.1     | -0.1    | 7.0373  | -0.1833 | 0.5913 | 70.0273 | 1.3315 | -0.7418 |
| 4/25/2019 7:54 | 0.1167  | -0.5583 | 6.8571  | -0.1083 | 0.5913 | 69.3636 | 1.315  | -0.7418 |
| 4/25/2019 7:55 | 0.2     | 0.2917  | 5.9515  | 0.1083  | 0.5913 | 67.3    | 1.3138 | -0.7418 |
| 4/25/2019 7:56 | 0.2     | -0.5083 | 6.9202  | -0.2333 | 0.5913 | 66.4909 | 1.2917 | -0.7418 |
| 4/25/2019 7:57 | 0.2     | -0.55   | 6.921   | -0.25   | 0.5913 | 65.76   | 1.2957 | -0.7418 |
| 4/25/2019 7:58 | 0.175   | 0.1333  | 6.6977  | -0.4333 | 0.5913 | 66.725  | 1.2963 | -0.7418 |
| 4/25/2019 7:59 | 0.1167  | -0.6    | 6.6297  | -0.375  | 0.5913 | 66.1727 | 1.2708 | -0.7418 |
| 4/25/2019 8:00 | 0.0667  | -0.7333 | 6.7134  | -0.2083 | 0.5913 | 65.4083 | 1.2815 | -0.7418 |
| 4/25/2019 8:01 | 0.0917  | -0.1    | 6.5071  | -0.2417 | 0.5913 | 65.3333 | 1.2733 | -0.7418 |
| 4/25/2019 8:02 | 0.0417  | -0.925  | 6.2234  | -0.175  | 0.5913 | 65.0545 | 1.2547 | -0.7418 |
| 4/25/2019 8:03 | 0.0833  | -1.0917 | 6.0438  | -0.475  | 0.5913 | 66.52   | 1.2682 | -0.7418 |
| 4/25/2019 8:04 | 0.1     | -0.4167 | 6.1183  | 0.6083  | 0.5913 | 66.5909 | 1.2442 | -0.7418 |
| 4/25/2019 8:05 | 0.1     | -0.4    | 5.97    | 0.1     | 0.5913 | 67.4091 | 1.2498 | -0.7418 |
| 4/25/2019 8:06 | 0.1     | -0.2833 | 5.7052  | 0.175   | 0.5913 | 66.6    | 1.2347 | -0.7418 |
| 4/25/2019 8:07 | 0.025   | -0.725  | 5.7497  | -0.95   | 0.5913 | 65.65   | 1.2087 | -0.7418 |
| 4/25/2019 8:08 | 0       | -0.2917 | 6.0038  | -0.55   | 0.5913 | 64.23   | 1.2202 | -0.7418 |
| 4/25/2019 8:09 | 0       | -0.5667 | 5.7982  | -0.0167 | 0.5913 | 62.325  | 1.199  | -0.7418 |
| 4/25/2019 8:10 | 0       | -0.2917 | 5.6652  | -0.0583 | 0.5913 | 59.9273 | 1.2088 | -0.7418 |
| 4/25/2019 8:11 | -0.0417 | -0.2417 | 5.3387  | -0.3083 | 0.5913 | 57.0417 | 1.202  | -0.7418 |
| 4/25/2019 8:12 | -0.1    | -0.1583 | 5.6942  | -0.325  | 0.5913 | 54.5273 | 1.191  | -0.7418 |
| 4/25/2019 8:13 | -0.1    | -0.3417 | 5.3793  | -0.675  | 0.5913 | 52.2667 | 1.1878 | -0.7418 |
| 4/25/2019 8:14 | -0.1    | 0.1083  | 5.6237  | -0.9167 | 0.5913 | 49.9727 | 1.1723 | -0.7418 |
| 4/25/2019 8:15 | -0.1    | -0.0417 | 5.3152  | 0.1833  | 0.5913 | 47.8167 | 1.1592 | -0.7418 |

|                |         |         |         |         |        |         |        |         |
|----------------|---------|---------|---------|---------|--------|---------|--------|---------|
| 4/25/2019 8:16 | -0.1    | 0.025   | 5.0412  | -0.5    | 0.5913 | 46.79   | 1.1693 | -0.7418 |
| 4/25/2019 8:17 | -0.0417 | -0.3667 | 5.0582  | -0.3583 | 0.5913 | 45.3    | 1.1533 | -0.7418 |
| 4/25/2019 8:18 | -0.0583 | -0.5    | 5.159   | -0.1917 | 0.5913 | 43.9727 | 1.1532 | -0.7418 |
| 4/25/2019 8:19 | 0       | -0.2667 | 4.8198  | -0.6833 | 0.5913 | 43.7    | 1.1455 | -0.7418 |
| 4/25/2019 8:20 | 0       | -0.35   | 4.9778  | -0.7667 | 0.5913 | 43.3727 | 1.1257 | -0.7418 |
| 4/25/2019 8:21 | 0       | -0.6833 | 4.7943  | -1.1417 | 0.5913 | 42.975  | 1.1195 | -0.7418 |
| 4/25/2019 8:22 | 0.05    | -0.4917 | 4.8468  | -0.4583 | 0.5913 | 42.7111 | 1.1207 | -0.7418 |
| 4/25/2019 8:23 | 0.1     | -0.1667 | 5.0158  | -1.0167 | 0.5913 | 42.3333 | 1.0862 | -0.7418 |
| 4/25/2019 8:24 | 0.175   | -0.3667 | 4.7908  | -0.0167 | 0.5913 | 41.96   | 1.1152 | -0.7418 |
| 4/25/2019 8:25 | 0.1917  | -0.3833 | 4.6498  | -0.375  | 0.5913 | 41.6727 | 1.1015 | -0.7418 |
| 4/25/2019 8:26 | 0.4417  | 1.35    | 4.4097  | 1.1417  | 0.5913 | 40.67   | 0.8705 | -0.7418 |
| 4/25/2019 8:27 | 0.6167  | 0.25    | 3.9893  | 0.5     | 0.5913 | 39.7273 | 0.9341 | -0.7418 |
| 4/25/2019 8:28 | 0.8333  | 0.925   | 4.1652  | 1.1167  | 0.5913 | 38.8818 | 0.9059 | -0.7418 |
| 4/25/2019 8:29 | 1.1333  | 1.9167  | 4.2938  | 2.6833  | 0.5913 | 37.3083 | 0.6992 | -0.7418 |
| 4/25/2019 8:30 | 1.3917  | 1.7833  | 4.1805  | 1.3583  | 0.5913 | 35.3818 | 0.6802 | -0.7418 |
| 4/25/2019 8:31 | 1.825   | 1.7583  | 3.7395  | 1.4667  | 0.5913 | 33.39   | 0.5965 | -0.7418 |
| 4/25/2019 8:32 | 1.9583  | 3.2083  | 4.3108  | 2.95    | 0.5913 | 31.23   | 0.5761 | -0.7418 |
| 4/25/2019 8:33 | 2.9083  | 5.5417  | 5.7958  | 5.1583  | 0.5913 | 28.9    | 0.4872 | -0.7418 |
| 4/25/2019 8:34 | 4.1167  | 6.8333  | 7.199   | 5.775   | 0.5913 | 26.4917 | 0.4341 | -0.7418 |
| 4/25/2019 8:35 | 5.5333  | 7.9333  | 7.6035  | 7.575   | 0.5913 | 23.98   | 0.4133 | -0.7418 |
| 4/25/2019 8:36 | 6.45    | 8.2583  | 8.1567  | 8.25    | 0.5913 | 21.9727 | 0.3744 | -0.7418 |
| 4/25/2019 8:37 | 7.1417  | 9.4917  | 9.5528  | 9.1833  | 0.5913 | 20.0636 | 0.3506 | -0.7418 |
| 4/25/2019 8:38 | 8.2083  | 11.75   | 10.99   | 11.2917 | 0.5913 | 17.5667 | 0.3452 | -0.7418 |
| 4/25/2019 8:39 | 9.2     | 11.7917 | 11.585  | 11.9917 | 0.5913 | 16.3636 | 0.3286 | -0.7418 |
| 4/25/2019 8:40 | 10      | 11.8333 | 11.1    | 11.725  | 0.5913 | 14.35   | 0.3253 | -0.7418 |
| 4/25/2019 8:41 | 10.3167 | 12.6333 | 11.9517 | 12.2083 | 0.5913 | 12.5667 | 0.3014 | -0.7418 |
| 4/25/2019 8:42 | 10.5083 | 12.575  | 12.555  | 12.4583 | 0.5913 | 11.0909 | 0.2835 | -0.7418 |
| 4/25/2019 8:43 | 10.775  | 12.625  | 11.945  | 12.575  | 0.5913 | 10      | 0.2825 | -0.7418 |
| 4/25/2019 8:44 | 10.9583 | 13.6833 | 11.565  | 12.4583 | 0.5913 | 8.8818  | 0.2789 | -0.7418 |
| 4/25/2019 8:45 | 11.1667 | 13.0167 | 12.1183 | 12.4167 | 0.5913 | 8.1091  | 0.2584 | -0.7418 |
| 4/25/2019 8:46 | 11.525  | 13.7083 | 13.21   | 13.3833 | 0.5913 | 7.3833  | 0.2679 | -0.7418 |
| 4/25/2019 8:47 | 11.8167 | 13.9083 | 12.8517 | 13.7417 | 0.5913 | 6.7667  | 0.254  | -0.7418 |
| 4/25/2019 8:48 | 12.0417 | 13.325  | 13.0817 | 14.1833 | 0.5913 | 5.9333  | 0.2345 | -0.7418 |
| 4/25/2019 8:49 | 12.2583 | 14.9417 | 13.8133 | 14.625  | 0.5913 | 4.575   | 0.2479 | -0.7418 |
| 4/25/2019 8:50 | 12.5917 | 13.9333 | 13.7917 | 14.375  | 0.5913 | 4.1417  | 0.2308 | -0.7418 |
| 4/25/2019 8:51 | 12.7583 | 13.9417 | 14.1467 | 14.4333 | 0.5913 | 3.4333  | 0.2303 | -0.7418 |
| 4/25/2019 8:52 | 13.0583 | 15.4583 | 14.2883 | 16.2    | 0.5913 | 2.575   | 0.2201 | -0.7418 |
| 4/25/2019 8:53 | 13.4417 | 15.9917 | 15.0217 | 15.975  | 0.5913 | 2.3833  | 0.1994 | -0.7418 |
| 4/25/2019 8:54 | 13.8667 | 15.05   | 13.8917 | 15.5833 | 0.5913 | 2.25    | 0.2182 | -0.7418 |
| 4/25/2019 8:55 | 14.0333 | 16.2333 | 15.275  | 16.25   | 0.5913 | 2.2     | 0.2109 | -0.7418 |
| 4/25/2019 8:56 | 13.9083 | 16.1667 | 14.4333 | 15.45   | 0.5913 | 2.1083  | 0.2058 | -0.7418 |
| 4/25/2019 8:57 | 14.05   | 17.25   | 15.28   | 16.95   | 0.5913 | 2.1     | 0.2146 | -0.7418 |
| 4/25/2019 8:58 | 14.35   | 15.8917 | 15.5683 | 16.8417 | 0.5913 | 2       | 0.2076 | -0.7418 |
| 4/25/2019 8:59 | 14.6917 | 17.0667 | 15.8483 | 16.8583 | 0.5913 | 1.92    | 0.2019 | -0.7418 |
| 4/25/2019 9:00 | 15.075  | 17.8083 | 16.5683 | 17.2917 | 0.5913 | 1.9     | 0.2083 | -0.7418 |
| 4/25/2019 9:01 | 15.5833 | 18.5667 | 17.705  | 18.775  | 0.5913 | 1.89    | 0.1975 | -0.7418 |
| 4/25/2019 9:02 | 16.0667 | 17.7167 | 16.7383 | 18.6167 | 0.5913 | 1.8     | 0.1916 | -0.7418 |



|                |         |         |          |         |        |          |        |         |
|----------------|---------|---------|----------|---------|--------|----------|--------|---------|
| 4/25/2019 9:03 | 16.475  | 19.05   | 17.54    | 19.1667 | 0.5913 | 1.8      | 0.2042 | -0.7418 |
| 4/25/2019 9:04 | 16.6083 | 18.8417 | 17.7083  | 19.6417 | 0.5913 | 1.75     | 0.2018 | -0.7418 |
| 4/25/2019 9:05 | 17.1167 | 20.2833 | 18.9217  | 20.45   | 0.5913 | 1.67     | 0.1813 | -0.7418 |
| 4/25/2019 9:06 | 17.5083 | 19.9333 | 18.5517  | 20.15   | 0.5913 | 1.7      | 0.1935 | -0.7418 |
| 4/25/2019 9:07 | 17.7417 | 20.7583 | 18.7233  | 20.4417 | 0.5913 | 1.6455   | 0.1745 | -0.7418 |
| 4/25/2019 9:08 | 17.7083 | 19.8917 | 19.0517  | 20.2333 | 0.5913 | 1.5545   | 0.1733 | -0.7418 |
| 4/25/2019 9:09 | 17.8    | 19.6417 | 19.1167  | 20.0917 | 0.5913 | 1.5      | 0.1886 | -0.7418 |
| 4/25/2019 9:10 | 17.9167 | 19.475  | 18.3533  | 20.1667 | 0.5913 | 1.4083   | 0.171  | -0.7418 |
| 4/25/2019 9:11 | 18.075  | 19.8583 | 19.3317  | 20.4    | 0.5913 | 1.4      | 0.1651 | -0.7418 |
| 4/25/2019 9:12 | 18.1167 | 20.725  | 19.0933  | 20.425  | 0.5913 | 1.3417   | 0.1772 | -0.7418 |
| 4/25/2019 9:13 | 18.1667 | 19.575  | 18.805   | 20.425  | 0.5913 | 1.3      | 0.1675 | -0.7418 |
| 4/25/2019 9:14 | 18.0583 | 19.975  | 18.7567  | 19.9667 | 0.5913 | 1.3      | 0.1698 | -0.7418 |
| 4/25/2019 9:15 | 18.325  | 20.8417 | 19.585   | 21.0917 | 0.5913 | 1.3      | 0.1724 | -0.7418 |
| 4/25/2019 9:16 | 18.6583 | 21.125  | 19.7333  | 20.8333 | 0.5913 | 1.3      | 0.159  | -0.7418 |
| 4/25/2019 9:17 | 18.95   | 21.1333 | 19.8017  | 20.6083 | 0.5913 | 1.3      | 0.1646 | -0.7418 |
| 4/25/2019 9:18 | 18.6583 | 19.4917 | 19.1217  | 20.025  | 0.5913 | 1.3      | 0.172  | -0.7418 |
| 4/25/2019 9:19 | 18.5167 | 20.9167 | 19.5433  | 21.125  | 0.5913 | 1.3      | 0.1557 | -0.7418 |
| 4/25/2019 9:20 | 18.5833 | 21.1667 | 20.0083  | 21.1167 | 0.5913 | 1.4917   | 0.1603 | -0.7418 |
| 4/25/2019 9:21 | 18.8667 | 21.275  | 19.385   | 20.6083 | 0.5913 | 1.7364   | 0.162  | -0.7418 |
| 4/25/2019 9:22 | 19.075  | 21.3917 | 20.1867  | 21.9333 | 0.5913 | 2.0417   | 0.1551 | -0.7418 |
| 4/25/2019 9:23 | 19.25   | 21.225  | 20.0683  | 21.7167 | 0.5913 | 2.4      | 0.1542 | -0.7418 |
| 4/25/2019 9:24 | 19.425  | 21.05   | 19.9617  | 21.4417 | 0.5913 | 2.69     | 0.1596 | -0.7418 |
| 4/25/2019 9:25 | 18.8833 | 19.1417 | 18.0317  | 18.9417 | 0.5913 | 2.7364   | 0.1542 | -0.7418 |
| 4/25/2019 9:26 | 18      | 17.975  | 17.3067  | 18.0667 | 0.5913 | 2.9818   | 0.1651 | -0.7418 |
| 4/25/2019 9:27 | 16.8083 | 16.2667 | 16.2867  | 16.5667 | 0.5913 | 3.4083   | 0.1761 | -0.7418 |
| 4/25/2019 9:28 | 16.1167 | 17.225  | 16.355   | 17.15   | 0.5913 | 4.0167   | 0.1539 | -0.7418 |
| 4/25/2019 9:29 | 15.6    | 16.8083 | 15.94    | 16.4333 | 0.5913 | 4.3364   | 0.1719 | -0.7418 |
| 4/25/2019 9:30 | 14.975  | 15.4    | 14.2317  | 14.8    | 0.5913 | 4.675    | 0.175  | -0.7418 |
| 4/25/2019 9:31 | 14.0667 | 14.2417 | 13.8167  | 14.875  | 0.5913 | 4.93     | 0.1853 | -0.7418 |
| 4/25/2019 9:32 | 13.7667 | 15.7167 | 15.2558  | 16.0917 | 0.5913 | 5        | 0.1783 | -0.7418 |
| 4/25/2019 9:33 | 13.525  | 13.6083 | 17.0517  | 13.45   | 0.5913 | 5.0545   | 0.2475 | -0.7418 |
| 4/25/2019 9:34 | 11.6    | 8.4083  | 51.3658  | 9.525   | 0.5913 | 14.1083  | 0.8244 | -0.7418 |
| 4/25/2019 9:35 | 7.5417  | 3.1667  | 168.7917 | 7.8     | 0.5913 | 48.11    | 2.2211 | -0.7418 |
| 4/25/2019 9:36 | 3.4917  | 1.35    | 168.775  | 5.0583  | 0.5913 | 32.4083  | 2.2965 | -0.7418 |
| 4/25/2019 9:37 | 1.2833  | 0.5333  | 174.1583 | 4.65    | 0.5913 | 41.2909  | 2.4738 | -0.7418 |
| 4/25/2019 9:38 | 0.5333  | 1.2667  | 197.1583 | 4.2833  | 0.5913 | 62.925   | 2.833  | -0.7418 |
| 4/25/2019 9:39 | 0.1333  | 0.4583  | 230.9083 | 3.2083  | 0.5913 | 45.2909  | 3.3413 | -0.7418 |
| 4/25/2019 9:40 | -0.0667 | 0.05    | 234.725  | 4.2083  | 0.5913 | 67.2727  | 3.5626 | -0.7418 |
| 4/25/2019 9:41 | -0.1417 | 0.4167  | 212.5167 | 3.6083  | 0.5913 | 95.9     | 3.4459 | -0.7418 |
| 4/25/2019 9:42 | -0.1583 | 0.2667  | 210.15   | 3.5833  | 0.5913 | 74.8167  | 3.5834 | -0.7418 |
| 4/25/2019 9:43 | -0.1333 | 0.4083  | 202.1583 | 3.2333  | 0.5913 | 93.0583  | 3.508  | -0.7418 |
| 4/25/2019 9:44 | -0.1083 | 0.15    | 204.1083 | 3.1167  | 0.5913 | 117.2917 | 3.7713 | -0.7418 |
| 4/25/2019 9:45 | -0.1    | 0.475   | 202.9833 | 2.8917  | 0.5913 | 102.25   | 3.9092 | -0.7418 |
| 4/25/2019 9:46 | -0.1    | 1.0167  | 203.1333 | 3.0583  | 0.5913 | 103.1333 | 4.1008 | -0.7418 |
| 4/25/2019 9:47 | -0.0333 | 0.4083  | 204.3667 | 3.5583  | 0.5913 | 113.7364 | 4.156  | -0.7418 |
| 4/25/2019 9:48 | 0       | 0.8917  | 204.8583 | 3.1417  | 0.5913 | 118.2833 | 4.3604 | -0.7418 |
| 4/25/2019 9:49 | 0.0083  | 0.8917  | 198.6417 | 3.15    | 0.5913 | 68.125   | 4.2618 | -0.7418 |

|                 |         |         |          |        |        |          |        |         |
|-----------------|---------|---------|----------|--------|--------|----------|--------|---------|
| 4/25/2019 9:50  | 0.075   | 0.2083  | 194.75   | 2.825  | 0.5913 | 113.1917 | 4.3343 | -0.7418 |
| 4/25/2019 9:51  | 0.1     | -0.0417 | 192.2667 | 2.5083 | 0.5913 | 129.9091 | 4.437  | -0.7418 |
| 4/25/2019 9:52  | 0.1     | 0.2917  | 187.775  | 2.4667 | 0.5913 | 96.825   | 4.4899 | -0.7418 |
| 4/25/2019 9:53  | 0.1     | -0.1    | 184.3917 | 2.4583 | 0.5913 | 93.0545  | 4.4983 | -0.7418 |
| 4/25/2019 9:54  | 0.1182  | 0.8917  | 178.725  | 2.4583 | 0.5913 | 76.5583  | 4.4762 | -0.7418 |
| 4/25/2019 9:55  | 0.1833  | 0.7333  | 175.35   | 2.6917 | 0.5913 | 54.8083  | 4.55   | -0.7418 |
| 4/25/2019 9:56  | 0.2     | -0.1667 | 172.2083 | 2.6417 | 0.5913 | 54.3455  | 4.5078 | -0.7418 |
| 4/25/2019 9:57  | 0.2583  | 0.9     | 168.9333 | 2.8917 | 0.5913 | 56.4455  | 4.6123 | -0.7418 |
| 4/25/2019 9:58  | 0.2583  | 0.625   | 165.5833 | 2.0417 | 0.5913 | 86.2667  | 4.6113 | -0.7418 |
| 4/25/2019 9:59  | 0.2     | 0.55    | 161.8917 | 2.7    | 0.5913 | 65.8182  | 4.5949 | -0.7418 |
| 4/25/2019 10:00 | 0.1167  | 0.5333  | 158.25   | 2.7    | 0.5913 | 119.9545 | 4.5763 | -0.7418 |
| 4/25/2019 10:01 | 0.1     | 0.8083  | 154.6833 | 2.0167 | 0.5913 | 80.6091  | 4.5953 | -0.7418 |
| 4/25/2019 10:02 | 0.1     | 0.425   | 151.7    | 1.8917 | 0.5913 | 66.5818  | 4.5743 | -0.7418 |
| 4/25/2019 10:03 | 0.0917  | 0.2917  | 149.2583 | 1.6333 | 0.5913 | 79.9364  | 4.6021 | -0.7418 |
| 4/25/2019 10:04 | 0.05    | -0.3583 | 145.5    | 1.9917 | 0.5913 | 72.7727  | 4.5857 | -0.7418 |
| 4/25/2019 10:05 | 0       | 0.95    | 143.8    | 1.9333 | 0.5913 | 101.6417 | 4.5985 | -0.7418 |
| 4/25/2019 10:06 | 0       | 0.375   | 140.975  | 1.8083 | 0.5913 | 65.57    | 4.5626 | -0.7418 |
| 4/25/2019 10:07 | 0       | 0.4667  | 137.9    | 1.675  | 0.5913 | 51.7     | 4.5612 | -0.7418 |
| 4/25/2019 10:08 | 0.0833  | 0.3167  | 135.175  | 1.6833 | 0.5913 | 51.1     | 4.5542 | -0.7418 |
| 4/25/2019 10:09 | 0.1     | -0.3917 | 133.1083 | 1.975  | 0.5913 | 51.0917  | 4.5287 | -0.7418 |
| 4/25/2019 10:10 | 0.075   | 0.4667  | 130.425  | 1.1333 | 0.5913 | 71.9273  | 4.5063 | -0.7418 |
| 4/25/2019 10:11 | 0.0917  | 0.3833  | 128.8667 | 2.25   | 0.5913 | 72.0083  | 4.4951 | -0.7418 |
| 4/25/2019 10:12 | 0.1     | 0.5583  | 126.9083 | 1.4333 | 0.5913 | 67.5455  | 4.4933 | -0.7418 |
| 4/25/2019 10:13 | 0.1     | -0.15   | 124.0667 | 1.0417 | 0.5913 | 70.675   | 4.4575 | -0.7418 |
| 4/25/2019 10:14 | 0.0833  | -0.3833 | 121.9583 | 1.675  | 0.5913 | 67.5333  | 4.4289 | -0.7418 |
| 4/25/2019 10:15 | 0.05    | 0.3167  | 120.2083 | 2.3    | 0.5913 | 66.8727  | 4.4167 | -0.7418 |
| 4/25/2019 10:16 | 0.1     | 0.125   | 117.7583 | 1.9083 | 0.5913 | 64.1417  | 4.3961 | -0.7418 |
| 4/25/2019 10:17 | 0.1333  | 0.6083  | 116.275  | 1.425  | 0.5913 | 85.8182  | 4.3581 | -0.7418 |
| 4/25/2019 10:18 | 0.2     | 0.4583  | 114.4333 | 1.1333 | 0.5913 | 85.375   | 4.3425 | -0.7418 |
| 4/25/2019 10:19 | 0.1917  | 0.175   | 112.5    | 2      | 0.5913 | 53.7818  | 4.3148 | -0.7418 |
| 4/25/2019 10:20 | 0.1     | 0.0667  | 110.6167 | 1.0333 | 0.5913 | 80.35    | 4.2758 | -0.7418 |
| 4/25/2019 10:21 | 0.05    | 0.2333  | 109.025  | 1.0417 | 0.5913 | 65.05    | 4.2598 | -0.7418 |
| 4/25/2019 10:22 | 0       | 0.05    | 107.3667 | 1.0333 | 0.5913 | 62.9545  | 4.2341 | -0.7418 |
| 4/25/2019 10:23 | 0.0833  | 0.1667  | 105.7167 | 1.1667 | 0.5913 | 46.6636  | 4.2138 | -0.7418 |
| 4/25/2019 10:24 | 0.0417  | 0.0333  | 104.3    | 1.6333 | 0.5913 | 47.1167  | 4.2094 | -0.7418 |
| 4/25/2019 10:25 | 0       | 0.3583  | 102.5333 | 1.3583 | 0.5913 | 47.4273  | 4.1658 | -0.7418 |
| 4/25/2019 10:26 | 0       | 0.525   | 101.1833 | 1.3833 | 0.5913 | 51.35    | 4.1567 | -0.7418 |
| 4/25/2019 10:27 | 0       | 0.225   | 99.4975  | 1.3583 | 0.5913 | 45.8417  | 4.1273 | -0.7418 |
| 4/25/2019 10:28 | 0       | 0.3667  | 98.13    | 1.0667 | 0.5913 | 58.3818  | 4.1027 | -0.7418 |
| 4/25/2019 10:29 | 0       | 0.5417  | 97.0642  | 1.4917 | 0.5913 | 89.7364  | 4.0998 | -0.7418 |
| 4/25/2019 10:30 | 0       | -0.175  | 94.7167  | 0.9833 | 0.5913 | 86.4167  | 4.0541 | -0.7418 |
| 4/25/2019 10:31 | 0       | 0.4333  | 93.0667  | 0.775  | 0.5913 | 61.9083  | 4.0208 | -0.7418 |
| 4/25/2019 10:32 | 0       | 0.7667  | 92.0333  | 0.9167 | 0.5913 | 72.075   | 4.0247 | -0.7418 |
| 4/25/2019 10:33 | -0.0917 | 0.475   | 90.8933  | 0.8    | 0.5913 | 80.6273  | 3.9803 | -0.7418 |
| 4/25/2019 10:34 | -0.1    | 0.7167  | 89.4825  | 0.7    | 0.5913 | 77.5     | 3.9746 | -0.7418 |
| 4/25/2019 10:35 | -0.05   | 0.6167  | 88.1825  | 0.975  | 0.5913 | 74.5273  | 3.9444 | -0.7418 |
| 4/25/2019 10:36 | 0       | 0.2667  | 87.3     | 1.0917 | 0.5913 | 71.175   | 3.9303 | -0.7418 |

|                 |         |         |         |         |        |         |        |         |
|-----------------|---------|---------|---------|---------|--------|---------|--------|---------|
| 4/25/2019 10:37 | 0       | 0.45    | 86.28   | 1.1667  | 0.5913 | 68.2    | 3.9223 | -0.7418 |
| 4/25/2019 10:38 | 0       | 0.5167  | 84.8842 | 0.85    | 0.5913 | 64.8333 | 3.8849 | -0.7418 |
| 4/25/2019 10:39 | 0       | 0.875   | 83.7792 | 0.675   | 0.5913 | 61.5    | 3.8585 | -0.7418 |
| 4/25/2019 10:40 | 0.0083  | 0.3667  | 82.3658 | 0.9     | 0.5913 | 58.4364 | 3.8544 | -0.7418 |
| 4/25/2019 10:41 | 0       | -0.7    | 81.3183 | 0.725   | 0.5913 | 55.0727 | 3.8197 | -0.7418 |
| 4/25/2019 10:42 | 0.0583  | 0.5333  | 80.2992 | 1.0417  | 0.5913 | 52.0917 | 3.8079 | -0.7418 |
| 4/25/2019 10:43 | 0       | 0.7167  | 79.2158 | 0.425   | 0.5913 | 50.3909 | 3.7808 | -0.7418 |
| 4/25/2019 10:44 | 0       | -0.275  | 78.2567 | 0.3667  | 0.5913 | 49.95   | 3.7513 | -0.7418 |
| 4/25/2019 10:45 | 0       | 0.1917  | 77.76   | 0.4667  | 0.5913 | 67.9583 | 3.7668 | -0.7418 |
| 4/25/2019 10:46 | 0       | 0.3583  | 75.955  | 0.4833  | 0.5913 | 69.925  | 3.7309 | -0.7418 |
| 4/25/2019 10:47 | 0       | 0.1667  | 75.2492 | 0.3083  | 0.5913 | 44.0273 | 3.7087 | -0.7418 |
| 4/25/2019 10:48 | 0       | -0.3417 | 74.2375 | 0.4667  | 0.5913 | 39.5583 | 3.7038 | -0.7418 |
| 4/25/2019 10:49 | 0       | 0.0083  | 73.4458 | 0.5083  | 0.5913 | 39.1727 | 3.6649 | -0.7418 |
| 4/25/2019 10:50 | 0.0083  | -0.2333 | 72.23   | 0.3417  | 0.5913 | 38.0917 | 3.6483 | -0.7418 |
| 4/25/2019 10:51 | 0.1083  | 0.4917  | 66.21   | 0.1167  | 0.5913 | 37.1    | 3.4458 | -0.7418 |
| 4/25/2019 10:52 | 0.3333  | 1.7667  | 47.3058 | 0.8583  | 0.5913 | 26.3909 | 2.819  | -0.7418 |
| 4/25/2019 10:53 | 0.4833  | 0.6667  | 57.8667 | 0.7917  | 0.5913 | 35.5    | 3.1858 | -0.7418 |
| 4/25/2019 10:54 | 0.8417  | 2.275   | 46.2792 | 1.8917  | 0.5913 | 29.0273 | 2.7393 | -0.7418 |
| 4/25/2019 10:55 | 1.0167  | 1.0667  | 37.0225 | 1.0167  | 0.5913 | 31.5583 | 2.4721 | -0.7418 |
| 4/25/2019 10:56 | 1.1417  | 2.1083  | 34.34   | 1.45    | 0.5913 | 33.05   | 2.3478 | -0.7418 |
| 4/25/2019 10:57 | 1.4     | 4.0167  | 27.3058 | 3.8167  | 0.5913 | 21.9636 | 1.8877 | -0.7418 |
| 4/25/2019 10:58 | 1.6917  | 2.9333  | 27.5075 | 3.1583  | 0.5913 | 20.7455 | 1.9026 | -0.7418 |
| 4/25/2019 10:59 | 2.15    | 3.5583  | 23.5483 | 3.5833  | 0.5913 | 20.3909 | 1.9288 | -0.7418 |
| 4/25/2019 11:00 | 2.2417  | 4       | 21.4892 | 3.4667  | 0.5913 | 20.0417 | 1.7744 | -0.7418 |
| 4/25/2019 11:01 | 2.6833  | 5.7333  | 19.0525 | 5.1667  | 0.5913 | 19.4    | 1.514  | -0.7418 |
| 4/25/2019 11:02 | 2.975   | 5.375   | 19.0675 | 4.35    | 0.5913 | 18.37   | 1.549  | -0.7418 |
| 4/25/2019 11:03 | 3.3917  | 6.1833  | 18.2883 | 5.475   | 0.5913 | 17.3636 | 1.4259 | -0.7418 |
| 4/25/2019 11:04 | 3.9     | 7.8833  | 17.8133 | 8.2667  | 0.5913 | 16.8636 | 1.222  | -0.7418 |
| 4/25/2019 11:05 | 4.6083  | 7.3583  | 17.1283 | 6.8833  | 0.5913 | 17.1333 | 1.1958 | -0.7418 |
| 4/25/2019 11:06 | 5.4083  | 8.9167  | 16.5367 | 8.325   | 0.5913 | 17.4909 | 1.0931 | -0.7418 |
| 4/25/2019 11:07 | 5.6917  | 9.2667  | 16.3767 | 8.4083  | 0.5913 | 17.2083 | 1.1056 | -0.7418 |
| 4/25/2019 11:08 | 6.6     | 11.3583 | 16.215  | 10.8    | 0.5913 | 16.6667 | 0.9113 | -0.7418 |
| 4/25/2019 11:09 | 6.8     | 8.8583  | 15.8017 | 8.775   | 0.5913 | 15.3583 | 1.0153 | -0.7418 |
| 4/25/2019 11:10 | 7.2917  | 11.05   | 16.425  | 10.6083 | 0.5913 | 14.8167 | 0.9183 | -0.7418 |
| 4/25/2019 11:11 | 7.375   | 11.5833 | 16.165  | 11.1583 | 0.5913 | 14.67   | 0.8436 | -0.7418 |
| 4/25/2019 11:12 | 7.95    | 11.7417 | 16.6883 | 11.45   | 0.5913 | 14.3417 | 0.837  | -0.7418 |
| 4/25/2019 11:13 | 8.4833  | 13.8667 | 16.5733 | 12.8333 | 0.5913 | 13.38   | 0.7537 | -0.7418 |
| 4/25/2019 11:14 | 9.25    | 13.5417 | 16.7767 | 13.375  | 0.5913 | 12.7917 | 0.7096 | -0.7418 |
| 4/25/2019 11:15 | 10      | 14.1333 | 17.2817 | 14.6667 | 0.5913 | 12.35   | 0.6967 | -0.7418 |
| 4/25/2019 11:16 | 10.8    | 15.5833 | 17.6483 | 14.4583 | 0.5913 | 11.8583 | 0.6281 | -0.7418 |
| 4/25/2019 11:17 | 11.2417 | 15.6417 | 17.4717 | 15.5167 | 0.5913 | 10.0364 | 0.6034 | -0.7418 |
| 4/25/2019 11:18 | 11.7417 | 15.4    | 18.02   | 15.3417 | 0.5913 | 8.125   | 0.6046 | -0.7418 |
| 4/25/2019 11:19 | 12.4833 | 17.875  | 18.4433 | 17.7833 | 0.5913 | 6.6091  | 0.526  | -0.7418 |
| 4/25/2019 11:20 | 13.0083 | 15.7583 | 17.7817 | 15.7667 | 0.5913 | 5.5273  | 0.5471 | -0.7418 |
| 4/25/2019 11:21 | 13.75   | 18.0167 | 19.0283 | 18.2083 | 0.5913 | 5.0583  | 0.4944 | -0.7418 |
| 4/25/2019 11:22 | 14.0833 | 17.8417 | 19.7183 | 18.1583 | 0.5913 | 4.42    | 0.4788 | -0.7418 |
| 4/25/2019 11:23 | 14.2    | 15.6583 | 18.24   | 16.975  | 0.5913 | 3.2917  | 0.5032 | -0.7418 |

|                 |         |         |         |         |        |        |        |         |
|-----------------|---------|---------|---------|---------|--------|--------|--------|---------|
| 4/25/2019 11:24 | 14.4    | 18.175  | 19.225  | 18.2583 | 0.5913 | 2.26   | 0.4587 | -0.7418 |
| 4/25/2019 11:25 | 14.825  | 20.5083 | 20.2317 | 20.175  | 0.5913 | 1.9545 | 0.4305 | -0.7418 |
| 4/25/2019 11:26 | 15.125  | 16.6917 | 18.7267 | 17.0583 | 0.5913 | 2      | 0.4458 | -0.7418 |
| 4/25/2019 11:27 | 15.1417 | 18.3167 | 19.3433 | 18.8667 | 0.5913 | 2.1091 | 0.4323 | -0.7418 |
| 4/25/2019 11:28 | 15.0333 | 19.0083 | 19.8117 | 19.45   | 0.5913 | 2.4636 | 0.4063 | -0.7418 |
| 4/25/2019 11:29 | 15.35   | 19.325  | 19.6167 | 18.475  | 0.5913 | 2.9    | 0.4116 | -0.7418 |
| 4/25/2019 11:30 | 16.15   | 20.2667 | 21.0233 | 20.2667 | 0.5913 | 3.7667 | 0.3688 | -0.7418 |
| 4/25/2019 11:31 | 16.2833 | 18.9333 | 19.5783 | 19.2833 | 0.5913 | 4.3909 | 0.3914 | -0.7418 |
| 4/25/2019 11:32 | 16.225  | 18.1917 | 19.135  | 17.8833 | 0.5913 | 4.5    | 0.387  | -0.7418 |
| 4/25/2019 11:33 | 15.875  | 20.5667 | 20.1233 | 19.875  | 0.5913 | 4.54   | 0.373  | -0.7418 |
| 4/25/2019 11:34 | 16.625  | 21.5    | 21.795  | 21.675  | 0.5913 | 4.8    | 0.3369 | -0.7418 |
| 4/25/2019 11:35 | 17.3417 | 21.3083 | 21.9517 | 20.5667 | 0.5913 | 4.9167 | 0.3302 | -0.7418 |
| 4/25/2019 11:36 | 17.925  | 20.7    | 21.215  | 20.9583 | 0.5913 | 5.1917 | 0.3475 | -0.7418 |
| 4/25/2019 11:37 | 17.7667 | 20.6333 | 21.3383 | 21.6583 | 0.5913 | 5.2083 | 0.3192 | -0.7418 |
| 4/25/2019 11:38 | 17.9333 | 21.9833 | 22.17   | 22.3917 | 0.5913 | 5.42   | 0.3117 | -0.7418 |
| 4/25/2019 11:39 | 18      | 22.0333 | 21.8217 | 21.8833 | 0.5913 | 5.7417 | 0.3307 | -0.7418 |
| 4/25/2019 11:40 | 18.7083 | 22.7417 | 23.705  | 23.55   | 0.5913 | 5.54   | 0.2818 | -0.7418 |
| 4/25/2019 11:41 | 19.0083 | 22.6917 | 23.065  | 22.5333 | 0.5913 | 5.4    | 0.2909 | -0.7418 |
| 4/25/2019 11:42 | 19.0667 | 20.5833 | 21.4317 | 21.025  | 0.5913 | 4.9636 | 0.2992 | -0.7418 |
| 4/25/2019 11:43 | 18.775  | 22.3333 | 22.325  | 22.1417 | 0.5913 | 4.225  | 0.2844 | -0.7418 |
| 4/25/2019 11:44 | 18.725  | 22.8167 | 22.3483 | 22.325  | 0.5913 | 4.1667 | 0.2824 | -0.7418 |
| 4/25/2019 11:45 | 19.05   | 22.6667 | 22.8517 | 22.7667 | 0.5913 | 4.475  | 0.2794 | -0.7418 |
| 4/25/2019 11:46 | 18.8917 | 21.6417 | 21.515  | 21.0417 | 0.5913 | 4.9091 | 0.2783 | -0.7418 |
| 4/25/2019 11:47 | 18.975  | 22.475  | 22.87   | 22.7167 | 0.5913 | 5.3917 | 0.2668 | -0.7418 |
| 4/25/2019 11:48 | 19.1    | 23.1833 | 23.6917 | 23.4    | 0.5913 | 5.8727 | 0.2646 | -0.7418 |
| 4/25/2019 11:49 | 19.4583 | 21.7917 | 21.955  | 21.2083 | 0.5913 | 6.0583 | 0.2552 | -0.7418 |
| 4/25/2019 11:50 | 19.5167 | 22.625  | 22.705  | 22.7917 | 0.5913 | 5.9667 | 0.2639 | -0.7418 |
| 4/25/2019 11:51 | 19.3    | 22.4667 | 21.8883 | 21.9333 | 0.5913 | 5.5333 | 0.253  | -0.7418 |
| 4/25/2019 11:52 | 19.2083 | 22.2    | 21.6783 | 22.4917 | 0.5913 | 5.2417 | 0.2511 | -0.7418 |
| 4/25/2019 11:53 | 19.175  | 22.6583 | 22.8817 | 23.1333 | 0.5913 | 4.7273 | 0.2497 | -0.7418 |
| 4/25/2019 11:54 | 19.15   | 22.325  | 22.4433 | 22.075  | 0.5913 | 4.4091 | 0.2391 | -0.7418 |
| 4/25/2019 11:55 | 19.375  | 22.8333 | 22.7733 | 22.8583 | 0.5913 | 4.4818 | 0.2448 | -0.7418 |
| 4/25/2019 11:56 | 19.3917 | 21.6917 | 22.5067 | 22.1    | 0.5913 | 4.5083 | 0.235  | -0.7418 |
| 4/25/2019 11:57 | 19.3    | 22.4583 | 22.25   | 22.05   | 0.5913 | 4.225  | 0.2309 | -0.7418 |
| 4/25/2019 11:58 | 19.5083 | 24.6333 | 24.215  | 24.125  | 0.5913 | 3.7917 | 0.2295 | -0.7418 |
| 4/25/2019 11:59 | 19.975  | 22.95   | 23.4133 | 23.5    | 0.5913 | 3.25   | 0.2202 | -0.7418 |
| 4/25/2019 12:00 | 20.35   | 22.2    | 23.095  | 23.3333 | 0.5913 | 2.4    | 0.2326 | -0.7418 |
| 4/25/2019 12:01 | 19.8583 | 21.6417 | 22.3217 | 21.8333 | 0.5913 | 1.9455 | 0.2318 | -0.7418 |
| 4/25/2019 12:02 | 19.7    | 23.5083 | 23.8433 | 23.9083 | 0.5913 | 1.8273 | 0.2208 | -0.7418 |
| 4/25/2019 12:03 | 19.8667 | 22.9167 | 22.82   | 23.3583 | 0.5913 | 1.8    | 0.2252 | -0.7418 |
| 4/25/2019 12:04 | 20.5636 | 24.9333 | 24.39   | 25.1583 | 0.5913 | 1.8    | 0.2195 | -0.7418 |
| 4/25/2019 12:05 | 21.1333 | 24.7083 | 25.16   | 24.8917 | 0.5913 | 1.8    | 0.2047 | -0.7418 |
| 4/25/2019 12:06 | 21.6167 | 25.3417 | 24.8317 | 24.8833 | 0.5913 | 1.74   | 0.2249 | -0.7418 |
| 4/25/2019 12:07 | 22.0333 | 25.5333 | 25.965  | 25.85   | 0.5913 | 1.4182 | 0.1993 | -0.7418 |
| 4/25/2019 12:08 | 21.85   | 23.7417 | 24.3333 | 24.2417 | 0.5913 | 1.24   | 0.2134 | -0.7418 |
| 4/25/2019 12:09 | 21.8    | 24.8917 | 24.3683 | 25      | 0.5913 | 1.2    | 0.2113 | -0.7418 |
| 4/25/2019 12:10 | 21.3583 | 23.5167 | 23.8383 | 24.0833 | 0.5913 | 1.0333 | 0.2023 | -0.7418 |

|                 |         |         |         |         |        |         |        |         |
|-----------------|---------|---------|---------|---------|--------|---------|--------|---------|
| 4/25/2019 12:11 | 21.0667 | 22.525  | 23.575  | 23.25   | 0.5913 | 0.8     | 0.2172 | -0.7418 |
| 4/25/2019 12:12 | 20.3917 | 21.925  | 23.0417 | 21.825  | 0.5913 | 0.8     | 0.2168 | -0.7418 |
| 4/25/2019 12:13 | 19.725  | 21.4583 | 21.7267 | 21.8333 | 0.5913 | 0.8     | 0.2082 | -0.7418 |
| 4/25/2019 12:14 | 19.0917 | 20.5333 | 21.3433 | 20.775  | 0.5913 | 0.8     | 0.2212 | -0.7418 |
| 4/25/2019 12:15 | 18.6    | 20.8417 | 21.4067 | 19.775  | 0.5913 | 0.8333  | 0.2104 | -0.7418 |
| 4/25/2019 12:16 | 18.125  | 19.775  | 20.545  | 19.2667 | 0.5913 | 0.9     | 0.2086 | -0.7418 |
| 4/25/2019 12:17 | 17.7833 | 18.5167 | 20.53   | 18.4333 | 0.5913 | 1.0818  | 0.2247 | -0.7418 |
| 4/25/2019 12:18 | 17.1667 | 17.7667 | 19.5683 | 18.125  | 0.5913 | 1.4     | 0.2072 | -0.7418 |
| 4/25/2019 12:19 | 16.4583 | 17.6167 | 18.6567 | 17.6417 | 0.5913 | 1.4833  | 0.2199 | -0.7418 |
| 4/25/2019 12:20 | 15.85   | 17.1417 | 18.7717 | 16.7333 | 0.5913 | 1.5     | 0.2219 | -0.7418 |
| 4/25/2019 12:21 | 15.375  | 15.7083 | 17.82   | 15.6083 | 0.5913 | 1.8364  | 0.2187 | -0.7418 |
| 4/25/2019 12:22 | 14.9583 | 15.8    | 17.825  | 16.3167 | 0.5913 | 2.5917  | 0.2252 | -0.7418 |
| 4/25/2019 12:23 | 14.425  | 15.75   | 17.0333 | 15.725  | 0.5913 | 3.1917  | 0.2128 | -0.7418 |
| 4/25/2019 12:24 | 13.925  | 15.5833 | 16.9533 | 15.5417 | 0.5913 | 3.5083  | 0.2229 | -0.7418 |
| 4/25/2019 12:25 | 13.4333 | 13.8583 | 16.4233 | 14.9583 | 0.5913 | 3.6     | 0.2297 | -0.7418 |
| 4/25/2019 12:26 | 12.9917 | 13.55   | 15.7883 | 14.4083 | 0.5913 | 3.6     | 0.2128 | -0.7418 |
| 4/25/2019 12:27 | 12.5417 | 12.5    | 15.01   | 12.825  | 0.5913 | 3.6273  | 0.2305 | -0.7418 |
| 4/25/2019 12:28 | 11.5083 | 9.9     | 14.2033 | 9.8     | 0.5913 | 4.4364  | 0.318  | -0.7418 |
| 4/25/2019 12:29 | 10.4083 | 11.5333 | 14.5217 | 11.2833 | 0.5913 | 5.92    | 0.3519 | -0.7418 |
| 4/25/2019 12:30 | 9.2583  | 8.0167  | 15.0783 | 8.3917  | 0.5913 | 6.4182  | 0.3186 | -0.7418 |
| 4/25/2019 12:31 | 7.6     | 6.2833  | 25.88   | 7.1083  | 0.5913 | 8.1455  | 0.9791 | -0.7418 |
| 4/25/2019 12:32 | 5.4083  | 2.45    | 24.8175 | 3.3083  | 0.5913 | 32.3    | 1.0641 | -0.7418 |
| 4/25/2019 12:33 | 2.9083  | 1.7833  | 21.7383 | 1.0583  | 0.5913 | 51.46   | 0.8297 | -0.7418 |
| 4/25/2019 12:34 | 1.4545  | 0.3417  | 26.9475 | 1.0833  | 0.5913 | 39.4917 | 1.0491 | -0.7418 |
| 4/25/2019 12:35 | 0.6667  | -0.0583 | 33.3075 | 0.8417  | 0.5913 | 36.6    | 1.2567 | -0.7418 |
| 4/25/2019 12:36 | 0.3417  | -0.075  | 39.145  | 1.325   | 0.5913 | 38.23   | 1.4505 | -0.7418 |
| 4/25/2019 12:37 | 0.2     | 1.0417  | 45.2708 | 0.3667  | 0.5913 | 49.13   | 1.5388 | -0.7418 |
| 4/25/2019 12:38 | 0.1083  | 0.0667  | 63.0675 | 1.3333  | 0.5913 | 50.725  | 1.8308 | -0.7418 |
| 4/25/2019 12:39 | 0.0417  | 0.1     | 57.9092 | 1.075   | 0.5913 | 37.1667 | 1.8245 | -0.7418 |
| 4/25/2019 12:40 | 0.0083  | 0.6417  | 64.1433 | 1.3167  | 0.5913 | 38.6364 | 1.951  | -0.7418 |
| 4/25/2019 12:41 | 0.0167  | 0.3417  | 70.6975 | 1.35    | 0.5913 | 60.7083 | 2.069  | -0.7418 |
| 4/25/2019 12:42 | 0.1     | -0.05   | 74.3625 | 1.3333  | 0.5913 | 39.1909 | 2.1237 | -0.7418 |
| 4/25/2019 12:43 | 0.1     | 0.5583  | 76.8358 | 1.0667  | 0.5913 | 38.0583 | 2.2043 | -0.7418 |
| 4/25/2019 12:44 | 0.1     | 0.25    | 76.095  | 0.6167  | 0.5913 | 46.6455 | 2.2337 | -0.7418 |
| 4/25/2019 12:45 | 0.1     | 0.3917  | 73.9025 | 1.1667  | 0.5913 | 47.7818 | 2.2353 | -0.7418 |
| 4/25/2019 12:46 | 0.15    | 0.3833  | 74.1158 | 1.5333  | 0.5913 | 48.1583 | 2.271  | -0.7418 |
| 4/25/2019 12:47 | 0.2     | -0.075  | 74.7433 | 1.5083  | 0.5913 | 48.9273 | 2.3152 | -0.7418 |
| 4/25/2019 12:48 | 0.2     | -0.0167 | 72.5075 | 1.2083  | 0.5913 | 49.7364 | 2.3352 | -0.7418 |
| 4/25/2019 12:49 | 0.2     | 0.175   | 71.0483 | 1.0667  | 0.5913 | 49.6583 | 2.295  | -0.7418 |
| 4/25/2019 12:50 | 0.175   | -0.0833 | 69.7892 | 1.0583  | 0.5913 | 49.5333 | 2.3075 | -0.7418 |
| 4/25/2019 12:51 | 0.1     | -0.15   | 68.36   | 1.2167  | 0.5913 | 48.8273 | 2.3318 | -0.7418 |
| 4/25/2019 12:52 | 0.1     | -0.4167 | 66.7133 | 1.375   | 0.5913 | 49.3091 | 2.3083 | -0.7418 |
| 4/25/2019 12:53 | 0.1     | 0.075   | 65.7075 | 0.925   | 0.5913 | 48.6636 | 2.31   | -0.7418 |
| 4/25/2019 12:54 | 0.2     | 0.55    | 65.2225 | 0.95    | 0.5913 | 49.2091 | 2.3205 | -0.7418 |
| 4/25/2019 12:55 | 0.2     | 0.15    | 64.2358 | 1.5     | 0.5913 | 49.0364 | 2.3137 | -0.7418 |
| 4/25/2019 12:56 | 0.2     | -0.6333 | 62.8033 | 0.7167  | 0.5913 | 49.8273 | 2.3122 | -0.7418 |
| 4/25/2019 12:57 | 0.2     | -0.7083 | 60.9825 | 0.9583  | 0.5913 | 49.1182 | 2.2988 | -0.7418 |

|                 |         |         |         |         |        |         |        |         |
|-----------------|---------|---------|---------|---------|--------|---------|--------|---------|
| 4/25/2019 12:58 | 0.1583  | -0.4167 | 59.9458 | 0.7667  | 0.5913 | 47.925  | 2.2798 | -0.7418 |
| 4/25/2019 12:59 | 0.075   | 0.375   | 58.4558 | 0.8917  | 0.5913 | 45.6364 | 2.275  | -0.7418 |
| 4/25/2019 13:00 | 0.0167  | -0.2    | 57.4467 | 0.6417  | 0.5913 | 43.8    | 2.262  | -0.7418 |
| 4/25/2019 13:01 | 0       | 0.1583  | 56.7833 | 0.675   | 0.5913 | 42.2546 | 2.2627 | -0.7418 |
| 4/25/2019 13:02 | 0       | 0.4417  | 55.5817 | 0.4667  | 0.5913 | 40.8818 | 2.246  | -0.7418 |
| 4/25/2019 13:03 | -0.0583 | 0.625   | 55.0933 | 0.0833  | 0.5913 | 40.26   | 2.238  | -0.7418 |
| 4/25/2019 13:04 | -0.1    | 0.2333  | 54.1125 | 0.3833  | 0.5913 | 38.68   | 2.2283 | -0.7418 |
| 4/25/2019 13:05 | -0.1    | -0.5083 | 53.3433 | 0.4333  | 0.5913 | 37.7273 | 2.2102 | -0.7418 |
| 4/25/2019 13:06 | -0.1    | -0.1167 | 52.4825 | 0.8417  | 0.5913 | 36.4    | 2.217  | -0.7418 |
| 4/25/2019 13:07 | -0.175  | -0.0333 | 51.1967 | 0.05    | 0.5913 | 35.0909 | 2.1973 | -0.7418 |
| 4/25/2019 13:08 | -0.2    | 0.275   | 50.5842 | 0.375   | 0.5913 | 32.8583 | 2.1738 | -0.7418 |
| 4/25/2019 13:09 | -0.2    | -0.075  | 49.8842 | 0.4333  | 0.5913 | 32.0182 | 2.1727 | -0.7418 |
| 4/25/2019 13:10 | -0.2    | -0.7583 | 49.215  | 0.1667  | 0.5913 | 32.9083 | 2.1618 | -0.7418 |
| 4/25/2019 13:11 | -0.15   | -0.4667 | 47.9133 | 0.425   | 0.5913 | 34.5909 | 2.1463 | -0.7418 |
| 4/25/2019 13:12 | -0.1    | -0.2083 | 47.38   | 0.1917  | 0.5913 | 35.0167 | 2.142  | -0.7418 |
| 4/25/2019 13:13 | -0.1    | -0.1083 | 46.8308 | 0.625   | 0.5913 | 34.9182 | 2.114  | -0.7418 |
| 4/25/2019 13:14 | -0.1    | -0.2833 | 46.3975 | -0.1583 | 0.5913 | 35.225  | 2.1182 | -0.7418 |
| 4/25/2019 13:15 | -0.1583 | -0.0167 | 45.4642 | -0.0667 | 0.5913 | 35.1917 | 2.103  | -0.7418 |
| 4/25/2019 13:16 | -0.1    | -0.2917 | 44.855  | 0.5417  | 0.5913 | 35      | 2.0837 | -0.7418 |
| 4/25/2019 13:17 | -0.1    | -0.375  | 44.3217 | 0.3917  | 0.5913 | 34.7455 | 2.077  | -0.7418 |
| 4/25/2019 13:18 | -0.1    | 0.25    | 43.6308 | -0.1083 | 0.5913 | 34.3    | 2.063  | -0.7418 |
| 4/25/2019 13:19 | -0.1    | -0.1167 | 42.7925 | 0.0833  | 0.5913 | 34.125  | 2.0465 | -0.7418 |
| 4/25/2019 13:20 | -0.1    | -0.4    | 41.97   | 0.1     | 0.5913 | 35.1667 | 2.0453 | -0.7418 |
| 4/25/2019 13:21 | -0.0917 | 0.1417  | 41.6867 | -0.3667 | 0.5913 | 35.4182 | 2.027  | -0.7418 |
| 4/25/2019 13:22 | 0       | -0.0083 | 40.7933 | 0.175   | 0.5913 | 34.6583 | 2.0223 | -0.7418 |
| 4/25/2019 13:23 | 0       | 0.0167  | 40.5058 | 0.225   | 0.5913 | 32.24   | 2.0108 | -0.7418 |
| 4/25/2019 13:24 | 0       | 0.2333  | 40.0108 | 0.0583  | 0.5913 | 31.1818 | 1.9808 | -0.7418 |
| 4/25/2019 13:25 | -0.1    | 0.1917  | 39.2925 | 0.1333  | 0.5913 | 30.6083 | 1.9925 | -0.7418 |
| 4/25/2019 13:26 | -0.1    | -0.3583 | 39.0075 | 0.2     | 0.5913 | 30.1273 | 1.9682 | -0.7418 |
| 4/25/2019 13:27 | -0.1    | 0.15    | 38.32   | -0.0417 | 0.5913 | 29.43   | 1.961  | -0.7418 |
| 4/25/2019 13:28 | -0.1    | -0.1083 | 38.0967 | 0.2083  | 0.5913 | 29.2417 | 1.962  | -0.7418 |
| 4/25/2019 13:29 | -0.1    | -0.2167 | 37.665  | 0.3667  | 0.5913 | 29.1    | 1.9356 | -0.7418 |
| 4/25/2019 13:30 | -0.1083 | 0.8     | 37.115  | -0.3333 | 0.5913 | 28.8546 | 1.9327 | -0.7418 |
| 4/25/2019 13:31 | -0.1167 | 0.3083  | 36.5458 | 0.075   | 0.5913 | 28.6545 | 1.9276 | -0.7418 |
| 4/25/2019 13:32 | -0.1667 | -0.0083 | 35.9425 | -0.025  | 0.5913 | 27.3909 | 1.9078 | -0.7418 |
| 4/25/2019 13:33 | -0.1    | -0.1083 | 35.8508 | 0.2833  | 0.5913 | 26.3273 | 1.9073 | -0.7418 |
| 4/25/2019 13:34 | -0.1    | -0.2333 | 35.1833 | -0.175  | 0.5913 | 26.1091 | 1.8881 | -0.7418 |
| 4/25/2019 13:35 | -0.1    | -0.7333 | 34.8408 | -0.075  | 0.5913 | 25.9455 | 1.8873 | -0.7418 |
| 4/25/2019 13:36 | -0.1    | -0.1083 | 34.4017 | 0.3167  | 0.5913 | 25.875  | 1.8846 | -0.7418 |
| 4/25/2019 13:37 | -0.1    | 0.2     | 34.1575 | -0.15   | 0.5913 | 25.7167 | 1.8607 | -0.7418 |
| 4/25/2019 13:38 | -0.0167 | 0.1417  | 33.885  | 0.2667  | 0.5913 | 25.4636 | 1.8624 | -0.7418 |
| 4/25/2019 13:39 | 0       | -0.2417 | 33.1833 | 0.6417  | 0.5913 | 25.2    | 1.836  | -0.7418 |
| 4/25/2019 13:40 | 0       | 0.0667  | 33.0608 | -0.1167 | 0.5913 | 24.9818 | 1.8363 | -0.7418 |
| 4/25/2019 13:41 | 0       | 0.3083  | 32.4908 | 0.3333  | 0.5913 | 24.6667 | 1.8287 | -0.7418 |
| 4/25/2019 13:42 | 0       | -0.3667 | 31.9775 | 0.3167  | 0.5913 | 24.3    | 1.8051 | -0.7418 |
| 4/25/2019 13:43 | 0       | -0.3167 | 31.6308 | 0.25    | 0.5913 | 24.1333 | 1.8143 | -0.7418 |
| 4/25/2019 13:44 | 0.0667  | -0.45   | 31.3692 | 0.475   | 0.5913 | 23.9455 | 1.796  | -0.7418 |

|                 |         |         |         |         |        |         |        |         |
|-----------------|---------|---------|---------|---------|--------|---------|--------|---------|
| 4/25/2019 13:45 | 0.075   | -0.75   | 31.4025 | 0.4333  | 0.5913 | 23.7818 | 1.7878 | -0.7418 |
| 4/25/2019 13:46 | 0.05    | 0.0833  | 30.3425 | 0.0917  | 0.5913 | 23.5636 | 1.7883 | -0.7418 |
| 4/25/2019 13:47 | 0.1     | -0.6167 | 30.2125 | 0.2667  | 0.5913 | 23.4    | 1.7706 | -0.7418 |
| 4/25/2019 13:48 | 0.1     | -0.3167 | 30.45   | -0.0417 | 0.5913 | 23.14   | 1.7686 | -0.7418 |
| 4/25/2019 13:49 | 0.1833  | -0.6167 | 29.69   | 0.3167  | 0.5913 | 22.81   | 1.7633 | -0.7418 |
| 4/25/2019 13:50 | 0.1667  | 0.05    | 29.3508 | 0.2     | 0.5913 | 22.6364 | 1.7428 | -0.7418 |
| 4/25/2019 13:51 | 0.2     | -0.1417 | 28.9067 | 0.2333  | 0.5913 | 22.46   | 1.7412 | -0.7418 |
| 4/25/2019 13:52 | 0.4167  | 1.1417  | 24.7142 | 1.8083  | 0.5913 | 22.1    | 1.4609 | -0.7418 |
| 4/25/2019 13:53 | 0.7083  | 0.35    | 24.4242 | 0.3083  | 0.5913 | 21.5    | 1.4919 | -0.7418 |
| 4/25/2019 13:54 | 0.8667  | 0.3917  | 25.91   | 1.3917  | 0.5913 | 21.175  | 1.5833 | -0.7418 |
| 4/25/2019 13:55 | 1.0417  | 2.125   | 24.135  | 1.375   | 0.5913 | 20.7182 | 1.4171 | -0.7418 |
| 4/25/2019 13:56 | 1.4167  | 2.5333  | 23.03   | 2.7917  | 0.5913 | 19.8417 | 1.3272 | -0.7418 |
| 4/25/2019 13:57 | 1.925   | 2.6917  | 22.3883 | 2.3917  | 0.5913 | 19      | 1.3194 | -0.7418 |
| 4/25/2019 13:58 | 2.4083  | 4.3667  | 21.325  | 4.0667  | 0.5913 | 17.9182 | 1.1861 | -0.7418 |
| 4/25/2019 13:59 | 2.85    | 4.425   | 20.4933 | 4.6417  | 0.5913 | 16.86   | 1.1201 | -0.7418 |
| 4/25/2019 14:00 | 3.75    | 5.8083  | 19.2925 | 5.5167  | 0.5913 | 15.5    | 0.9869 | -0.7418 |
| 4/25/2019 14:01 | 4.475   | 6.4833  | 19.1975 | 6.85    | 0.5913 | 14.1667 | 0.9601 | -0.7418 |
| 4/25/2019 14:02 | 5.225   | 7.1917  | 18.8608 | 7.4833  | 0.5913 | 12.8091 | 0.902  | -0.7418 |
| 4/25/2019 14:03 | 6.1     | 8.95    | 18.685  | 9.1833  | 0.5913 | 11.2182 | 0.7752 | -0.7418 |
| 4/25/2019 14:04 | 6.9583  | 8.6917  | 18.4067 | 9.4417  | 0.5913 | 9.9727  | 0.7634 | -0.7418 |
| 4/25/2019 14:05 | 7.7     | 9.05    | 17.7133 | 10.2417 | 0.5913 | 8.9222  | 0.6994 | -0.7418 |
| 4/25/2019 14:06 | 7.75    | 8.7833  | 16.285  | 8.7417  | 0.5913 | 7.7417  |        | -0.7418 |
| 4/25/2019 14:07 | 7.4167  | 8.1167  | 14.055  | 7.7667  | 0.5913 | 6.81    |        | -0.7418 |
| 4/25/2019 14:08 | 6.8     | 7.3083  | 12.8433 | 7.0167  | 0.5913 | 6.1909  |        | -0.7418 |
| 4/25/2019 14:09 | 6.0583  | 5.6583  | 11.0783 | 5.8167  | 0.5913 | 5.8273  |        | -0.7418 |
| 4/25/2019 14:10 | 5.4583  | 6.1667  | 9.6663  | 5.725   | 0.5913 | 5.4833  |        | -0.7418 |
| 4/25/2019 14:11 | 5.025   | 5.7583  | 9.8888  | 6.2167  | 0.5913 | 5.3     |        | -0.7418 |
| 4/25/2019 14:12 | 5.05    | 7.2917  | 10.665  | 6.7833  | 0.5913 | 5.1333  |        | -0.7418 |
| 4/25/2019 14:13 | 5.4417  | 7.5167  | 10.5833 | 6.875   | 0.5913 | 5       |        | -0.7418 |
| 4/25/2019 14:14 | 5.8     | 7.4167  | 9.94    | 7.4417  | 0.5913 | 4.9     |        | -0.7418 |
| 4/25/2019 14:15 | 6.35    | 9.0667  | 10.7333 | 8.5083  | 0.5913 | 4.8818  |        | -0.7418 |
| 4/25/2019 14:16 | 6.8583  | 9.65    | 12.27   | 9.4833  | 0.5913 | 4.8     |        | -0.7418 |
| 4/25/2019 14:17 | 7.6417  | 10.725  | 11.9717 | 9.8667  | 0.5913 | 4.7     |        | -0.7418 |
| 4/25/2019 14:18 | 8.3083  | 10.6083 | 12.8567 | 10.525  | 0.5913 | 4.6     |        | -0.7418 |
| 4/25/2019 14:19 | 9.025   | 11.875  | 13.655  | 12.55   | 0.5913 | 4.2909  |        | -0.7418 |
| 4/25/2019 14:20 | 9.7667  | 12.5917 | 14.1317 | 12.6917 | 0.5913 | 4.05    |        | -0.7418 |
| 4/25/2019 14:21 | 10.6    | 13.2333 | 13.8833 | 13.325  | 0.5913 | 3.6636  |        | -0.7418 |
| 4/25/2019 14:22 | 11.2917 | 13.425  | 14.98   | 13.75   | 0.5913 | 3.2083  |        | -0.7418 |
| 4/25/2019 14:23 | 11.8083 | 14.3417 | 15.3317 | 14.225  | 0.5913 | 2.8273  |        | -0.7418 |
| 4/25/2019 14:24 | 12.3909 | 14.7583 | 16.1467 | 15.475  | 0.5913 | 2.5182  |        | -0.7418 |
| 4/25/2019 14:25 | 13.0167 | 16.3167 | 16.5317 | 16.55   | 0.5913 | 2.2909  |        | -0.7418 |
| 4/25/2019 14:26 | 13.925  | 16.9333 | 18.21   | 16.8    | 0.5913 | 2.1364  |        | -0.7418 |
| 4/25/2019 14:27 | 14.6917 | 17.725  | 18.2783 | 17.3333 | 0.5913 | 1.97    |        | -0.7418 |
| 4/25/2019 14:28 | 15.475  | 18.625  | 18.7333 | 18.8583 | 0.5913 | 1.8455  |        | -0.7418 |
| 4/25/2019 14:29 | 15.9667 | 18.7917 | 19.6167 | 19.075  | 0.5913 | 1.7818  |        | -0.7418 |
| 4/25/2019 14:30 | 16.9083 | 21.5    | 21.765  | 22.0917 | 0.5913 | 1.7     |        | -0.7418 |
| 4/25/2019 14:31 | 18.225  | 22.9167 | 21.9617 | 23.7167 | 0.5913 | 1.6364  |        | -0.7418 |

|                 |         |         |         |         |        |        |         |
|-----------------|---------|---------|---------|---------|--------|--------|---------|
| 4/25/2019 14:32 | 19.6667 | 23.55   | 23.2283 | 24.2333 | 0.5913 | 1.5545 | -0.7418 |
| 4/25/2019 14:33 | 20.3167 | 22.5417 | 21.995  | 22.7917 | 0.5913 | 1.46   | -0.7418 |
| 4/25/2019 14:34 | 20.0333 | 21.55   | 21.3783 | 21.4583 | 0.5913 | 1.4    | -0.7418 |
| 4/25/2019 14:35 | 19.4    | 21.225  | 21.1083 | 21.05   | 0.5913 | 1.4    | -0.7418 |
| 4/25/2019 14:36 | 18.9833 | 21.75   | 21.6317 | 22.2583 | 0.5913 | 1.3    | -0.7418 |
| 4/25/2019 14:37 | 19.125  | 22.4167 | 22.28   | 22.2667 | 0.5913 | 1.3    | -0.7418 |
| 4/25/2019 14:38 | 19.5833 | 22.3    | 22.685  | 22.725  | 0.5913 | 1.2091 | -0.7418 |
| 4/25/2019 14:39 | 19.775  | 21.425  | 22.1633 | 22.15   | 0.5913 | 1.2    | -0.7418 |
| 4/25/2019 14:40 | 19.7583 | 22.4    | 22.4733 | 22.4417 | 0.5913 | 1.2    | -0.7418 |
| 4/25/2019 14:41 | 19.6917 | 22.4167 | 22.3533 | 23.1917 | 0.5913 | 1.1583 | -0.7418 |
| 4/25/2019 14:42 | 19.7667 | 21.6917 | 22.3367 | 22.4    | 0.5913 | 1.1    | -0.7418 |
| 4/25/2019 14:43 | 19.8167 | 22.4333 | 22.69   | 22.3333 | 0.5913 | 1.1    | -0.7418 |
| 4/25/2019 14:44 | 19.725  | 22.2917 | 22.7517 | 22.6167 | 0.5913 | 1.1    | -0.7418 |
| 4/25/2019 14:45 | 19.85   | 23.4583 | 22.6933 | 23.75   | 0.5913 | 1.125  | -0.7418 |
| 4/25/2019 14:46 | 20.125  | 23.8    | 22.3517 | 23.075  | 0.5913 | 1.1    | -0.7418 |
| 4/25/2019 14:47 | 20.45   | 23.3167 | 22.5833 | 23.1917 | 0.5913 | 1.1    | -0.7418 |
| 4/25/2019 14:48 | 20.65   | 23.675  | 23.015  | 23.6333 | 0.5913 | 1.1    | -0.7418 |
| 4/25/2019 14:49 | 20.8333 | 24.025  | 22.8983 | 24.275  | 0.5913 | 1.125  | -0.7418 |
| 4/25/2019 14:50 | 21.2583 | 24.8667 | 23.3317 | 24.6083 | 0.5913 | 1.6    | -0.7418 |
| 4/25/2019 14:51 | 21.6583 | 23.9667 | 23.96   | 24.6167 | 0.5913 | 1.8    | -0.7418 |
| 4/25/2019 14:52 | 21.8333 | 24.8417 | 24.03   | 24.975  | 0.5913 | 1.73   | -0.7418 |
| 4/25/2019 14:53 | 21.8917 | 24.4083 | 24.9333 | 24.875  | 0.5913 | 1.7091 | -0.7418 |
| 4/25/2019 14:54 | 21.75   | 23.9    | 22.4483 | 24.425  | 0.5913 | 1.88   | -0.7418 |
| 4/25/2019 14:55 | 21.5667 | 23.9667 | 23.06   | 23.8167 | 0.5913 | 1.9    | -0.7418 |
| 4/25/2019 14:56 | 21.3    | 23.0417 | 23.1233 | 23.7667 | 0.5913 | 1.875  | -0.7418 |
| 4/25/2019 14:57 | 21.2583 | 23.5833 | 23.2767 | 24.05   | 0.5913 | 1.9    | -0.7418 |
| 4/25/2019 14:58 | 21.25   | 22.8    | 22.8133 | 23.8333 | 0.5913 | 1.9    | -0.7418 |
| 4/25/2019 14:59 | 21.3333 | 24.0833 | 23.43   | 24.3417 | 0.5913 | 1.9    | -0.7418 |
| 4/25/2019 15:00 | 21.3    | 23.7833 | 22.5033 | 23.65   | 0.5913 | 1.9    | -0.7418 |
| 4/25/2019 15:01 | 21.4083 | 23.2667 | 23.3467 | 24.3333 | 0.5913 | 1.9    | -0.7418 |
| 4/25/2019 15:02 | 21.5667 | 23.7583 | 24.4017 | 24.6333 | 0.5913 | 1.5    | -0.7418 |
| 4/25/2019 15:03 | 22.0417 | 26.1417 | 25.085  | 26.0083 | 0.5913 | 1.1    | -0.7418 |
| 4/25/2019 15:04 | 23.5167 | 28.6083 | 27.77   | 29.1083 | 0.5913 | 1.1    | -0.7418 |
| 4/25/2019 15:05 | 24.825  | 28.675  | 25.04   | 28.05   | 0.5913 | 1.1182 | -0.7418 |
| 4/25/2019 15:06 | 25.8917 | 28.1    | 26.915  | 28.8417 | 0.5913 | 1.1333 | -0.7418 |
| 4/25/2019 15:07 | 25.4917 | 26.1917 | 25.2817 | 26.6833 | 0.5913 | 1.725  | -0.7418 |
| 4/25/2019 15:08 | 24.775  | 26.225  | 26.0467 | 26.675  | 0.5913 | 2.1    | -0.7418 |
| 4/25/2019 15:09 | 23.9583 | 26.2417 | 25.1417 | 26.3167 | 0.5913 | 2.1    | -0.7418 |
| 4/25/2019 15:10 | 23.625  | 26.2583 | 25.465  | 26.2667 | 0.5913 | 2.1    | -0.7418 |
| 4/25/2019 15:11 | 23.6917 | 26.65   | 25.815  | 26.5667 | 0.5913 | 2.1    | -0.7418 |
| 4/25/2019 15:12 | 23.75   | 25.4417 | 25.97   | 26.3417 | 0.5913 | 2.1    | -0.7418 |
| 4/25/2019 15:13 | 23.8333 | 25.075  | 25.1333 | 25.8917 | 0.5913 | 2.1    | -0.7418 |
| 4/25/2019 15:14 | 23.65   | 25.4    | 25.05   | 25.9167 | 0.5913 | 2.1    | -0.7418 |
| 4/25/2019 15:15 | 23.3667 | 26.2667 | 24.7433 | 25.7083 | 0.5913 | 2.2583 | -0.7418 |
| 4/25/2019 15:16 | 23.25   | 26.0083 | 24.5217 | 26.5333 | 0.5913 | 2.5583 | -0.7418 |
| 4/25/2019 15:17 | 23.1167 | 24.4417 | 24.24   | 25.525  | 0.5913 | 2.7583 | -0.7418 |
| 4/25/2019 15:18 | 22.8833 | 23.7667 | 23.9067 | 25.0917 | 0.5913 | 3.4    | -0.7418 |



|                 |         |         |         |         |        |        |         |
|-----------------|---------|---------|---------|---------|--------|--------|---------|
| 4/25/2019 15:19 | 22.475  | 23.525  | 22.9733 | 23.9833 | 0.5913 | 3.8727 | -0.7418 |
| 4/25/2019 15:20 | 22.1583 | 23.9417 | 24.0633 | 24.9667 | 0.5913 | 4.0636 | -0.7418 |
| 4/25/2019 15:21 | 21.95   | 22.7333 | 23.1217 | 24.1917 | 0.5913 | 4.6917 | -0.7418 |
| 4/25/2019 15:22 | 21.8083 | 22.5333 | 22.9783 | 24.1333 | 0.5913 | 5.125  | -0.7418 |
| 4/25/2019 15:23 | 21.7833 | 23.6667 | 23.225  | 24.325  | 0.5913 | 5.7583 | -0.7418 |
| 4/25/2019 15:24 | 21.9667 | 23.5083 | 22.97   | 24.225  | 0.5913 | 6.5833 | -0.7418 |
| 4/25/2019 15:25 | 22.225  | 23.5333 | 23.8733 | 24.3917 | 0.5913 | 7.21   | -0.7418 |
| 4/25/2019 15:26 | 22.3833 | 24.425  | 23.9667 | 25.3167 | 0.5913 | 7.4333 | -0.7418 |
| 4/25/2019 15:27 | 22.3083 | 23.7167 | 24.1933 | 24.625  | 0.5913 | 7.5364 | -0.7418 |
| 4/25/2019 15:28 | 22.5    | 24.4583 | 24.2733 | 25.5583 | 0.5913 | 7.79   | -0.7418 |
| 4/25/2019 15:29 | 22.925  | 25.3083 | 25.0367 | 26.5583 | 0.5913 | 7.93   | -0.7418 |
| 4/25/2019 15:30 | 23.8167 | 26.3    | 25.9217 | 26.9917 | 0.5913 | 7.8182 | -0.7418 |
| 4/25/2019 15:31 | 24.2917 | 26.4833 | 25.4633 | 26.6417 | 0.5913 | 7.38   | -0.7418 |
| 4/25/2019 15:32 | 24.15   | 24.5833 | 24.5708 | 25.0833 | 0.5913 | 6.81   | -0.7418 |
| 4/25/2019 15:33 | 23.1917 | 23.775  | 23.0975 | 23.75   | 0.5913 | 6.31   | -0.7418 |
| 4/25/2019 15:34 | 22.1583 | 22.8    | 22.9475 | 22.6667 | 0.5913 | 6.5091 | -0.7418 |
| 4/25/2019 15:35 | 21.3    | 22.0667 | 22.0142 | 22.2667 | 0.5913 | 6.22   | -0.7418 |
| 4/25/2019 15:36 | 20.6417 | 21.675  | 21.6825 | 21.2417 | 0.5913 | 6.24   | -0.7418 |
| 4/25/2019 15:37 | 19.9667 | 20.7167 | 21.0575 | 20.5833 | 0.5913 | 6.4333 | -0.7418 |
| 4/25/2019 15:38 | 19.4583 | 21.1    | 20.7158 | 21.1083 | 0.5913 | 6.7917 | -0.7418 |
| 4/25/2019 15:39 | 19.05   | 19.8917 | 20.2508 | 19.8333 | 0.5913 | 7      | -0.7418 |
| 4/25/2019 15:40 | 18.775  | 19.625  | 19.7308 | 19.4667 | 0.5913 | 7.1417 | -0.7418 |
| 4/25/2019 15:41 | 18.4167 | 18.575  | 19.7108 | 18.7667 | 0.5913 | 7.5727 | -0.7418 |
| 4/25/2019 15:42 | 18.0333 | 18.625  | 19.1608 | 18.2333 | 0.5913 | 8.025  | -0.7418 |
| 4/25/2019 15:43 | 17.5833 | 18.6167 | 18.3075 | 18.6583 | 0.5913 | 7.88   | -0.7418 |
| 4/25/2019 15:44 | 17.2583 | 18.2083 | 18.6642 | 18.1    | 0.5913 | 7.8364 | -0.7418 |
| 4/25/2019 15:45 | 16.9083 | 18.7167 | 18.4183 | 18.0167 | 0.5913 | 7.7273 | -0.7418 |
| 4/25/2019 15:46 | 16.6333 | 16.6417 | 18.0992 | 17.1417 | 0.5913 | 7.2    | -0.7418 |
| 4/25/2019 15:47 | 16.2417 | 16.575  | 17.74   | 17.2333 | 0.5913 | 6.9455 | -0.7418 |
| 4/25/2019 15:48 | 15.8083 | 15.9833 | 17.49   | 16.85   | 0.5913 | 6.2455 | -0.7418 |
| 4/25/2019 15:49 | 15.3917 | 15.9583 | 17.0017 | 15.9417 | 0.5913 | 5.375  | -0.7418 |
| 4/25/2019 15:50 | 15.1167 | 14.8917 | 16.6217 | 15.7083 | 0.5913 | 4.5909 | -0.7418 |
| 4/25/2019 15:51 | 14.8333 | 15.0083 | 16.3208 | 15.8833 | 0.5913 | 4.3636 | -0.7418 |
| 4/25/2019 15:52 | 14.5167 | 14.8417 | 16.2133 | 15.0417 | 0.5913 | 3.8    | -0.7418 |
| 4/25/2019 15:53 | 14.1417 | 13.8333 | 15.6458 | 14.7833 | 0.5913 | 3.15   | -0.7418 |
| 4/25/2019 15:54 | 13.85   | 14.5083 | 15.72   | 14.3833 | 0.5913 | 2.3727 | -0.7418 |
| 4/25/2019 15:55 | 13.5667 | 13.925  | 15.38   | 14.125  | 0.5913 | 1.75   | -0.7418 |
| 4/25/2019 15:56 | 13.3167 | 13.9583 | 15.235  | 13.5417 | 0.5913 | 1.6182 | -0.7418 |
| 4/25/2019 15:57 | 12.9833 | 13.5583 | 14.8558 | 13.1583 | 0.5913 | 1.6364 | -0.7418 |
| 4/25/2019 15:58 | 12.725  | 12.725  | 14.6858 | 13.0167 | 0.5913 | 1.7    | -0.7418 |
| 4/25/2019 15:59 | 12.4167 | 12.575  | 14.1125 | 12.8167 | 0.5913 | 1.7091 | -0.7418 |
| 4/25/2019 16:00 | 12.1833 | 12.475  | 14.35   | 12.3417 | 0.5913 | 1.85   | -0.7418 |
| 4/25/2019 16:01 | 11.9167 | 12.5583 | 13.6342 | 11.7167 | 0.5913 | 1.9    | -0.7418 |
| 4/25/2019 16:02 | 11.6833 | 12.225  | 13.4392 | 12      | 0.5913 | 1.9    | -0.7418 |
| 4/25/2019 16:03 | 11.4583 | 11.975  | 13.3442 | 11.825  | 0.5913 | 1.9    | -0.7418 |
| 4/25/2019 16:04 | 11.2083 | 11.85   | 13.1867 | 11.0167 | 0.5913 | 1.9    | -0.7418 |
| 4/25/2019 16:05 | 10.9917 | 11.0667 | 12.5458 | 10.8583 | 0.5913 | 1.9    | -0.7418 |

|                 |         |         |         |         |        |        |         |
|-----------------|---------|---------|---------|---------|--------|--------|---------|
| 4/25/2019 16:06 | 10.8    | 10.6417 | 12.6667 | 10.775  | 0.5913 | 1.9    | -0.7418 |
| 4/25/2019 16:07 | 10.6167 | 11.1667 | 12.3775 | 10.9    | 0.5913 | 1.9    | -0.7418 |
| 4/25/2019 16:08 | 10.3917 | 10.5083 | 12.3225 | 10.9    | 0.5913 | 1.91   | -0.7418 |
| 4/25/2019 16:09 | 10.1167 | 10.2833 | 12.0792 | 9.8333  | 0.5913 | 1.99   | -0.7418 |
| 4/25/2019 16:10 | 9.8667  | 9.9333  | 11.6183 | 10.1917 | 0.5913 | 1.88   | -0.7418 |
| 4/25/2019 16:11 | 9.6333  | 10.1333 | 11.7208 | 10.5583 | 0.5913 | 1.9    | -0.7418 |
| 4/25/2019 16:12 | 9.5     | 9.6417  | 11.2292 | 9.875   | 0.5913 | 1.8273 | -0.7418 |
| 4/25/2019 16:13 | 9.325   | 9.4583  | 11.3325 | 9.4167  | 0.5913 | 1.8    | -0.7418 |
| 4/25/2019 16:14 | 9.1083  | 9.3     | 11.2408 | 9.3     | 0.5913 | 1.8    | -0.7418 |
| 4/25/2019 16:15 | 8.95    | 9.5     | 10.9525 | 9.125   | 0.5913 | 1.8    | -0.7418 |
| 4/25/2019 16:16 | 8.75    | 8.9833  | 10.7883 | 8.6     | 0.5913 | 1.8    | -0.7418 |
| 4/25/2019 16:17 | 8.5833  | 8.2833  | 10.7458 | 9.4833  | 0.5913 | 1.86   | -0.7418 |
| 4/25/2019 16:18 | 8.375   | 8.45    | 10.6958 | 8.5     | 0.5913 | 1.9    | -0.7418 |
| 4/25/2019 16:19 | 8.225   | 8.1667  | 10.0118 | 8.8167  | 0.5913 | 1.9    | -0.7418 |
| 4/25/2019 16:20 | 8.025   | 8.4917  | 10.3    | 8.4917  | 0.5913 | 1.9444 | -0.7418 |
| 4/25/2019 16:21 | 7.8333  | 8.025   | 10.0918 | 8.3917  | 0.5913 | 1.9    | -0.7418 |
| 4/25/2019 16:22 | 7.6583  | 8.0833  | 10.0058 | 8.1333  | 0.5913 | 1.9    | -0.7418 |
| 4/25/2019 16:23 | 7.475   | 7.7917  | 9.568   | 7.7833  | 0.5913 | 1.9    | -0.7418 |
| 4/25/2019 16:24 | 7.3583  | 7.65    | 9.5579  | 7.3917  | 0.5913 | 1.9    | -0.7418 |
| 4/25/2019 16:25 | 7.2333  | 6.9167  | 9.6272  | 7.55    | 0.5913 | 1.9    | -0.7418 |
| 4/25/2019 16:26 | 7.125   | 7.4917  | 9.5777  | 7.4167  | 0.5913 | 1.9    | -0.7418 |
| 4/25/2019 16:27 | 6.9667  | 7.7583  | 9.3131  | 6.9     | 0.5913 | 1.9    | -0.7418 |
| 4/25/2019 16:28 | 6.8333  | 7.2583  | 9.1864  | 7.2917  | 0.5913 | 1.9    | -0.7418 |
| 4/25/2019 16:29 | 6.7     | 7.5167  | 9.0366  | 6.3667  | 0.5913 | 1.9    | -0.7418 |
| 4/25/2019 16:30 | 6.55    | 7.175   | 9.0871  | 7.1     | 0.5913 | 1.8364 | -0.7418 |
| 4/25/2019 16:31 | 6.4333  | 6.8667  | 9.069   | 6.7083  | 0.5913 | 1.8    | -0.7418 |
| 4/25/2019 16:32 | 6.3167  | 6.9333  | 8.7234  | 6.35    | 0.5913 | 1.8    | -0.7418 |
| 4/25/2019 16:33 | 6.225   | 6.9167  | 8.2124  | 6.375   | 0.5913 | 1.8    | -0.7418 |
| 4/25/2019 16:34 | 6.1     | 6.5417  | 8.4687  | 6.3417  | 0.5913 | 1.8    | -0.7418 |
| 4/25/2019 16:35 | 5.9917  | 6.4417  | 8.462   | 6.3083  | 0.5913 | 1.8545 | -0.7418 |
| 4/25/2019 16:36 | 5.9     | 6.2833  | 8.4689  | 6.3083  | 0.5913 | 2.32   | -0.7418 |
| 4/25/2019 16:37 | 5.825   | 6.2333  | 8.3476  | 6.0417  | 0.5913 | 2.88   | -0.7418 |
| 4/25/2019 16:38 | 5.8     | 6.4083  | 8.1182  | 5.5     | 0.5913 | 3      | -0.7418 |
| 4/25/2019 16:39 | 5.7583  | 5.4417  | 8.2462  | 6.1667  | 0.5913 | 3.1222 | -0.7418 |
| 4/25/2019 16:40 | 5.65    | 5.6167  | 8.1563  | 6.325   | 0.5913 | 3.96   | -0.7418 |
| 4/25/2019 16:41 | 5.55    | 5.2667  | 8.2185  | 6.525   | 0.5913 | 4.83   | -0.7418 |
| 4/25/2019 16:42 | 5.5     | 5.275   | 7.7813  | 5.7083  | 0.5913 | 5      | -0.7418 |
| 4/25/2019 16:43 | 5.4083  | 5.5333  | 7.7713  | 5.3667  | 0.5913 | 5.0583 | -0.7418 |
| 4/25/2019 16:44 | 5.3083  | 5.3083  | 7.6697  | 5.0083  | 0.5913 | 5.2455 | -0.7418 |
| 4/25/2019 16:45 | 5.2417  | 5.0167  | 7.3598  | 5.4167  | 0.5913 | 5.3    | -0.7418 |
| 4/25/2019 16:46 | 5.1333  | 5.3167  | 7.5538  | 4.2083  | 0.5913 | 5.3    | -0.7418 |
| 4/25/2019 16:47 | 5.075   | 5.225   | 7.7853  | 4.7     | 0.5913 | 5.2818 | -0.7418 |
| 4/25/2019 16:48 | 4.9667  | 3.975   | 7.6041  | 4.875   | 0.5913 | 5      | -0.7418 |
| 4/25/2019 16:49 | 4.9     | 5.1417  | 7.3003  | 4.3417  | 0.5913 | 4.3273 | -0.7418 |
| 4/25/2019 16:50 | 4.8417  | 4.9167  | 7.2194  | 4.35    | 0.5913 | 4.2    | -0.7418 |
| 4/25/2019 16:51 | 4.7917  | 4.5     | 6.9345  | 4       | 0.5913 | 4.2    | -0.7418 |
| 4/25/2019 16:52 | 4.6833  | 5.2917  | 6.8884  | 4.25    | 0.5913 | 3.45   | -0.7418 |

|                 |        |        |        |        |        |        |        |         |
|-----------------|--------|--------|--------|--------|--------|--------|--------|---------|
| 4/25/2019 16:53 | 4.6    | 4.375  | 6.7505 | 4.5167 | 0.5913 | 2.6    |        | -0.7418 |
| 4/25/2019 16:54 | 4.5583 | 4.075  | 6.8963 | 3.7583 | 0.5913 | 2.3    |        | -0.7418 |
| 4/25/2019 16:55 | 4.5    | 4.4    | 6.823  | 3.875  | 0.5913 | 2.3    |        | -0.7418 |
| 4/25/2019 16:56 | 4.4417 | 4.775  | 7.1768 | 3.8083 | 0.5913 | 2.2    |        | -0.7418 |
| 4/25/2019 16:57 | 4.35   | 5.0333 | 7.0596 | 3.7917 | 0.5913 | 2.1    |        | -0.7418 |
| 4/25/2019 16:58 | 4.2    | 4.05   | 6.7933 | 4.125  | 0.5913 | 2.1    |        | -0.7418 |
| 4/25/2019 16:59 | 4.175  | 3.0167 | 6.2893 | 4.4667 | 0.5913 | 2.1    |        | -0.7418 |
| 4/25/2019 17:00 | 4.0833 | 3.925  | 6.6171 | 3.85   | 0.5913 | 2.1    |        | -0.7418 |
| 4/25/2019 17:01 | 4.0167 | 3.7917 | 6.6711 | 4.0417 | 0.5913 | 2.1    |        | -0.7418 |
| 4/25/2019 17:02 | 3.9167 | 3.8583 | 6.3653 | 3.7833 | 0.5913 | 2.1    |        | -0.7418 |
| 4/25/2019 17:03 | 3.9    | 3.425  | 6.5013 | 3.7333 | 0.5913 | 2.1636 |        | -0.7418 |
| 4/25/2019 17:04 | 3.9    | 3.4417 | 6.461  | 3.7167 | 0.5913 | 2.2    |        | -0.7418 |
| 4/25/2019 17:05 | 3.85   | 3.4833 | 6.4577 | 3.7083 | 0.5913 | 2.2    |        | -0.7418 |
| 4/25/2019 17:06 | 3.8    | 3.7583 | 6.3818 | 3.4417 | 0.5913 | 2.24   |        | -0.7418 |
| 4/25/2019 17:07 | 3.7333 | 3.5333 | 6.2952 | 3.6    | 0.5913 | 2.3    |        | -0.7418 |
| 4/25/2019 17:08 | 3.6667 | 3.8583 | 6.3563 | 3.5917 | 0.5913 | 2.3    | 0.161  | -0.7418 |
| 4/25/2019 17:09 | 3.575  | 3.65   | 6.269  | 3.425  | 0.5913 | 2.3    | 0.1719 | -0.7418 |
| 4/25/2019 17:10 | 3.5167 | 3.0083 | 6.2243 | 3.8583 | 0.5913 | 2.3    | 0.1735 | -0.7418 |
| 4/25/2019 17:11 | 3.5    | 3.6333 | 6.1795 | 2.925  | 0.5913 | 2.4    | 0.1687 | -0.7418 |
| 4/25/2019 17:12 | 3.4167 | 4.0167 | 5.8932 | 3.0583 | 0.5913 | 2.4    | 0.1768 | -0.7418 |
| 4/25/2019 17:13 | 3.3667 | 3.5    | 6.0352 | 2.7417 | 0.5913 | 2.4    | 0.1556 | -0.7418 |
| 4/25/2019 17:14 | 3.325  | 3      | 5.8562 | 2.9    | 0.5913 | 2.4    | 0.176  | -0.7418 |
| 4/25/2019 17:15 | 3.375  | 3.5333 | 5.8595 | 3.0833 | 0.5913 | 2.3727 | 0.1708 | -0.7418 |
| 4/25/2019 17:16 | 3.4    | 2.5833 | 5.6952 | 2.7833 | 0.5913 | 2.3    | 0.1584 | -0.7418 |
| 4/25/2019 17:17 | 3.35   | 2.8417 | 5.9092 | 2.9583 | 0.5913 | 2.3    | 0.1726 | -0.7418 |
| 4/25/2019 17:18 | 3.3    | 3.0833 | 5.6257 | 2.675  | 0.5913 | 2.3    | 0.1594 | -0.7418 |
| 4/25/2019 17:19 | 3.2    | 2.5583 | 5.7847 | 3.0083 | 0.5913 | 2.3    | 0.1742 | -0.7418 |
| 4/25/2019 17:20 | 3.2    | 2.9083 | 5.3697 | 2.9167 | 0.5913 | 2.3    | 0.162  | -0.7418 |
| 4/25/2019 17:21 | 3.1833 | 3.1833 | 5.5962 | 2.9583 | 0.5913 | 2.2818 | 0.1556 | -0.7418 |
| 4/25/2019 17:22 | 3.1    | 2.2833 | 5.842  | 3.1083 | 0.5913 | 2.2    | 0.1696 | -0.7418 |
| 4/25/2019 17:23 | 3.0167 | 2.6333 | 5.7163 | 3.5083 | 0.5913 | 2.2    | 0.1589 | -0.7418 |
| 4/25/2019 17:24 | 2.9417 | 3.1083 | 5.5358 | 2.825  | 0.5913 | 2.2    | 0.168  | -0.7418 |
| 4/25/2019 17:25 | 2.9    | 2.7917 | 5.9102 | 2.6583 | 0.5913 | 2.2    | 0.1654 | -0.7418 |
| 4/25/2019 17:26 | 2.8583 | 2.3833 | 5.3365 | 3.0917 | 0.5913 | 2.2    | 0.1602 | -0.7418 |
| 4/25/2019 17:27 | 2.8    | 2.3333 | 5.8028 | 2.2083 | 0.5913 | 2.2    | 0.171  | -0.7418 |
| 4/25/2019 17:28 | 2.8    | 2.425  | 5.1357 | 2.45   | 0.5913 | 2.2    | 0.1561 | -0.7418 |
| 4/25/2019 17:29 | 2.8    | 2.9917 | 5.9498 | 2.6083 | 0.5913 | 2.2    | 0.1665 | -0.7418 |
| 4/25/2019 17:30 | 2.7917 | 2.9917 | 5.644  |        | 0.5913 | 2.2    | 0.1655 | -0.7418 |
| 4/25/2019 17:31 | 2.7083 | 2.5917 | 5.6963 |        | 0.5913 | 2.2636 | 0.159  | -0.7418 |
| 4/25/2019 17:32 | 2.6667 | 3.0333 | 5.1592 |        | 0.5913 | 2.5    | 0.1732 | -0.7418 |
| 4/25/2019 17:33 | 2.6333 | 2.6917 | 5.6643 |        | 0.5913 | 2.8    | 0.1612 | -0.7418 |
| 4/25/2019 17:34 | 2.6    | 2.3917 | 5.1462 |        | 0.5913 | 2.8    | 0.1662 | -0.7418 |
| 4/25/2019 17:35 | 2.6    | 2.2    | 5.4445 |        | 0.5913 | 2.8    | 0.1665 | -0.7418 |
| 4/25/2019 17:36 | 2.5667 | 2.5833 | 4.8972 |        | 0.5913 | 2.8    | 0.1604 | -0.7418 |
| 4/25/2019 17:37 | 2.5    | 2.5667 | 5.4665 |        | 0.5913 | 2.8    | 0.1752 | -0.7418 |
| 4/25/2019 17:38 | 2.5    | 2.4917 | 5.6192 |        | 0.5913 | 2.8    | 0.157  | -0.7418 |
| 4/25/2019 17:39 | 2.4833 | 2.2    | 4.9065 |        | 0.5913 | 2.8    | 0.1579 | -0.7418 |

|                 |        |        |        |        |        |        |        |         |
|-----------------|--------|--------|--------|--------|--------|--------|--------|---------|
| 4/25/2019 17:40 | 2.5    | 1.6583 | 5.3338 |        | 0.5913 | 2.8    | 0.1661 | -0.7418 |
| 4/25/2019 17:41 | 2.4583 | 2.55   | 5.2625 |        | 0.5913 | 2.8182 | 0.1569 | -0.7418 |
| 4/25/2019 17:42 | 2.4    | 2.3083 | 5.1422 |        | 0.5913 | 3.1636 | 0.1726 | -0.7418 |
| 4/25/2019 17:43 | 2.4    | 1.3917 | 5.0533 |        | 0.5913 | 3.2455 | 0.1684 | -0.7418 |
| 4/25/2019 17:44 | 2.4    | 1.75   | 5.0105 |        | 0.5913 | 3.09   | 0.1673 | -0.7418 |
| 4/25/2019 17:45 | 2.4    | 1.6    | 5.0657 |        | 0.5913 | 2.6167 | 0.1732 | -0.7418 |
| 4/25/2019 17:46 | 2.3583 | 2.1833 | 5.122  | 2.05   | 0.5913 | 2.6    | 0.1593 | -0.7418 |
| 4/25/2019 17:47 | 2.3    | 2.2333 | 4.8883 | 2.4714 | 0.5913 | 2.6    | 0.1658 | -0.7418 |
| 4/25/2019 17:48 | 2.3    | 1.975  | 4.8208 | 2.5    | 0.5913 | 2.6273 | 0.1645 | -0.7418 |
| 4/25/2019 17:49 | 2.3    | 1.525  | 5.2237 | 2.1273 | 0.5913 | 2.6818 | 0.1613 | -0.7418 |
| 4/25/2019 17:50 | 2.225  | 1.7417 | 4.9695 | 1.8667 | 0.5913 | 2.9818 | 0.1733 | -0.7418 |
| 4/25/2019 17:51 | 2.2    | 2.1667 | 4.7415 | 2.1333 | 0.5913 | 3      | 0.1573 | -0.7418 |
| 4/25/2019 17:52 | 2.2    | 2.05   | 4.6323 | 2.35   | 0.5913 | 3      | 0.1645 | -0.7418 |
| 4/25/2019 17:53 | 2.2    | 1.5333 | 4.6963 | 2.0833 | 0.5913 | 3      | 0.1622 | -0.7418 |
| 4/25/2019 17:54 | 2.2    | 1.8417 | 5.0107 | 2.0667 | 0.5913 | 2.7455 | 0.1638 | -0.7418 |
| 4/25/2019 17:55 | 2.1909 | 2.0833 | 4.9957 | 1.05   | 0.5913 | 2.5    | 0.1676 | -0.7418 |
| 4/25/2019 17:56 | 2.1917 | 2.0667 | 5.2507 | 1.85   | 0.5913 | 2.5182 | 0.1558 | -0.7418 |
| 4/25/2019 17:57 | 2.2    | 1.9583 | 4.5223 | 1.8333 | 0.5913 | 2.6    | 0.169  | -0.7418 |
| 4/25/2019 17:58 | 2.2    | 2.3667 | 4.645  | 2.2333 | 0.5913 | 2.6    | 0.1651 | -0.7418 |
| 4/25/2019 17:59 | 2.2167 | 2.0083 | 4.4673 | 2.2833 | 0.5913 | 2.6    | 0.1622 | -0.7418 |
| 4/25/2019 18:00 | 2.2    | 1.7167 | 4.7428 | 1.9833 | 0.5913 | 2.6    | 0.1708 | -0.7418 |
| 4/25/2019 18:01 | 2.2    | 1.9167 | 4.7533 | 1.95   | 0.5913 | 2.5727 | 0.1569 | -0.7418 |
| 4/25/2019 18:02 | 2.2    | 1.7917 | 4.6122 | 1.5833 | 0.5913 | 2.3091 | 0.1759 | -0.7418 |
| 4/25/2019 18:03 | 2.2    | 2.2167 | 4.7063 | 1.3    | 0.5913 | 2.25   | 0.1687 | -0.7418 |
| 4/25/2019 18:04 | 2.2667 | 2.1583 | 4.8993 | 2.0167 | 0.5913 | 2.3    | 0.1595 | -0.7418 |
| 4/25/2019 18:05 | 2.2    | 1.9333 | 4.6027 | 2.3    | 0.5913 | 2.3091 | 0.1712 | -0.7418 |
| 4/25/2019 18:06 | 2.2    | 2.2583 | 4.5778 | 2.1333 | 0.5913 | 2.6909 | 0.156  | -0.7418 |
| 4/25/2019 18:07 | 2.1417 | 1.8    | 4.8533 | 1.25   | 0.5913 | 3.09   | 0.1718 | -0.7418 |
| 4/25/2019 18:08 | 2.1333 | 1.4833 | 4.3335 | 1.8333 | 0.5913 | 3.1182 | 0.1687 | -0.7418 |
| 4/25/2019 18:09 | 2.1    | 1.025  | 4.9288 | 1.5    | 0.5913 | 3.1    | 0.1617 | -0.7418 |
| 4/25/2019 18:10 | 2.1417 | 1.3667 | 4.5318 | 1.6167 | 0.5913 | 3.1    | 0.1735 | -0.7418 |
| 4/25/2019 18:11 | 2.1    | 1.2    | 4.5358 | 1.8667 | 0.5913 | 3.1    | 0.1599 | -0.7418 |
| 4/25/2019 18:12 | 2.0833 | 1.7    | 4.8588 | 1.7333 | 0.5913 | 3.1    | 0.1651 | -0.7418 |
| 4/25/2019 18:13 | 1.9333 | 1.2667 | 4.5165 | 1.7667 | 0.5913 | 3.1    | 0.1645 | -0.7418 |
| 4/25/2019 18:14 | 1.8333 | 1.6917 | 4.8005 | 1.6833 | 0.5913 | 3.1    | 0.165  | -0.7418 |
| 4/25/2019 18:15 | 1.7917 | 2.15   | 4.6718 | 1.4167 | 0.5913 | 3.1455 | 0.1747 | -0.7418 |
| 4/25/2019 18:16 | 1.75   | 1.6167 | 4.2022 | 1.2833 | 0.5913 | 3.2455 | 0.1584 | -0.7418 |
| 4/25/2019 18:17 | 1.775  | 1.3417 | 4.6957 | 1.5167 | 0.5913 | 3.3    | 0.1675 | -0.7418 |
| 4/25/2019 18:18 | 1.8    | 0.975  | 4.536  | 1.45   | 0.5913 | 3.0833 | 0.1624 | -0.7418 |
| 4/25/2019 18:19 | 1.7667 | 0.725  | 4.1677 | 1.15   | 0.5913 | 2.6455 | 0.1648 | -0.7418 |
| 4/25/2019 18:20 | 1.725  | 1.3917 | 4.2702 | 1.9833 | 0.5913 | 2.5818 | 0.1729 | -0.7418 |
| 4/25/2019 18:21 | 1.6417 | 1.8167 | 4.6468 | 0.7667 | 0.5913 | 2.5    | 0.1564 | -0.7418 |
| 4/25/2019 18:22 | 1.6    | 1.325  | 4.3523 | 1.3167 | 0.5913 | 2.5    | 0.1684 | -0.7418 |
| 4/25/2019 18:23 | 1.5833 | 1.4    | 4.3922 | 1.5667 | 0.5913 | 2.5    | 0.1681 | -0.7418 |
| 4/25/2019 18:24 | 1.6    | 1.0583 | 3.8528 | 1.65   | 0.5913 | 2.5    | 0.1554 | -0.7418 |
| 4/25/2019 18:25 | 1.6    | 1.0417 | 4.168  | 1.2667 | 0.5913 | 2.5    | 0.1695 | -0.7418 |
| 4/25/2019 18:26 | 1.6    | 1.175  | 4.2703 | 1.25   | 0.5913 | 2.5    | 0.1611 | -0.7418 |

|                 |        |        |        |        |        |        |        |         |
|-----------------|--------|--------|--------|--------|--------|--------|--------|---------|
| 4/25/2019 18:27 | 1.5    | 1.2833 | 4.3137 | 0.8667 | 0.5913 | 2.5    | 0.1703 | -0.7418 |
| 4/25/2019 18:28 | 1.5    | 1.7167 | 4.1597 | 0.85   | 0.5913 | 2.41   | 0.1724 | -0.7418 |
| 4/25/2019 18:29 | 1.4917 | 1.7583 | 4.4273 | 1.2    | 0.5913 | 2.3636 | 0.157  | -0.7418 |
| 4/25/2019 18:30 | 1.5    | 1.25   | 4.3152 | 1.15   | 0.5913 | 2.4    | 0.1795 | -0.7418 |
| 4/25/2019 18:31 | 1.475  | 0.8667 | 4.069  | 0.7833 | 0.5913 | 2.4    | 0.1662 | -0.7418 |
| 4/25/2019 18:32 | 1.4167 | 2.025  | 4.3433 | 0.9667 | 0.5913 | 2.4    | 0.1636 | -0.7418 |
| 4/25/2019 18:33 | 1.5    | 1.9083 | 4.2552 | 1.0167 | 0.5913 | 2.4    | 0.17   | -0.7418 |
| 4/25/2019 18:34 | 1.5    | 1.1583 | 4.1727 | 1.0167 | 0.5913 | 2.4    | 0.1564 | -0.7418 |
| 4/25/2019 18:35 | 1.5    | 0.7417 | 4.2838 | 0.75   | 0.5913 | 2.4    | 0.1729 | -0.7418 |
| 4/25/2019 18:36 | 1.5    | 0.8667 | 4.2791 | 0.6833 | 0.5913 | 2.4667 | 0.1639 | -0.7418 |
| 4/25/2019 18:37 | 1.5    | 0.875  | 4.1268 | 1.5333 | 0.5913 | 2.5    | 0.165  | -0.7418 |
| 4/25/2019 18:38 | 1.4667 | 1.5083 | 4.2833 | 0.4    | 0.5913 | 2.5    | 0.1666 | -0.7418 |
| 4/25/2019 18:39 | 1.4    | 1.1417 | 4.4628 | 1.2333 | 0.5913 | 2.5    | 0.157  | -0.7418 |
| 4/25/2019 18:40 | 1.4    | 0.625  | 4.0569 | 1.3167 | 0.5913 | 2.5    | 0.1672 | -0.7418 |
| 4/25/2019 18:41 | 1.4    | 0.8333 | 4.2295 | 1.25   | 0.5913 | 2.5    | 0.1631 | -0.7418 |
| 4/25/2019 18:42 | 1.4917 | 1.65   | 4.1219 | 0.9333 | 0.5913 | 2.5    | 0.1655 | -0.7418 |
| 4/25/2019 18:43 | 1.5    | 1.025  | 4.1213 | 0.3833 | 0.5913 | 2.5    | 0.1708 | -0.7418 |
| 4/25/2019 18:44 | 1.5    | 0.8417 | 4.2089 | 0.9667 | 0.5913 | 2.5    | 0.1586 | -0.7418 |
| 4/25/2019 18:45 | 1.5    | 1.225  | 4.1389 | 1.1667 | 0.5913 | 2.5636 | 0.169  | -0.7418 |
| 4/25/2019 18:46 | 1.5    | 1.2417 | 4.1573 | 1.1    | 0.5913 | 2.6    | 0.1658 | -0.7418 |
| 4/25/2019 18:47 | 1.5    | 1.2417 | 4.0386 | 1.1833 | 0.5913 | 2.6    | 0.1584 | -0.7418 |
| 4/25/2019 18:48 | 1.4083 | 0.7083 | 4.2041 | 0.75   | 0.5913 | 2.5364 | 0.1701 | -0.7418 |
| 4/25/2019 18:49 | 1.4    | 0.2    | 4.1298 | 1.0833 | 0.5913 | 2.5    | 0.1563 | -0.7418 |
| 4/25/2019 18:50 | 1.4    | 1.4583 | 4.3198 | 0.9833 | 0.5913 | 2.59   | 0.1671 | -0.7418 |
| 4/25/2019 18:51 | 1.4    | 1.3083 | 4.1195 | 0.4833 | 0.5913 | 2.6    | 0.1641 | -0.7418 |
| 4/25/2019 18:52 | 1.4    | 1.225  | 3.946  | 1.0667 | 0.5913 | 2.6    | 0.1618 | -0.7418 |
| 4/25/2019 18:53 | 1.3    | 0.4667 | 3.9567 | 0.8333 | 0.5913 | 2.6    | 0.1736 | -0.7418 |
| 4/25/2019 18:54 | 1.2417 | 1.1083 | 4.2293 | 0.85   | 0.5913 | 2.54   | 0.1541 | -0.7418 |
| 4/25/2019 18:55 | 1.2    | 0.325  | 4.0967 | 0.6333 | 0.5913 | 2.5091 | 0.1718 | -0.7418 |
| 4/25/2019 18:56 | 1.2    | 0.7667 | 3.7849 | 0.2667 | 0.5913 | 2.55   | 0.1685 | -0.7418 |
| 4/25/2019 18:57 | 1.2    | 1      | 4.1172 | 0.7167 | 0.5913 | 2.5    | 0.1591 | -0.7418 |
| 4/25/2019 18:58 | 1.2    | 0.875  | 3.843  | 1.4667 | 0.5913 | 2.5    | 0.1676 | -0.7418 |
| 4/25/2019 18:59 | 1.1333 | 0.6917 | 3.7416 | 0.2    | 0.5913 | 2.51   | 0.1653 | -0.7418 |
| 4/25/2019 19:00 | 1.1    | 1.075  | 3.9056 | 0.5333 | 0.5913 | 2.5545 | 0.1636 | -0.7418 |
| 4/25/2019 19:01 | 1.1    | 0.725  | 4.0998 | 0.8    | 0.5913 | 2.55   | 0.1651 | -0.7418 |
| 4/25/2019 19:02 | 1.1    | 1.35   | 3.7443 | 0.8833 | 0.5913 | 2.5    | 0.1611 | -0.7418 |
| 4/25/2019 19:03 | 1.1083 | 0.4667 | 3.7002 | 0.5833 | 0.5913 | 2.5    | 0.1724 | -0.7418 |
| 4/25/2019 19:04 | 1.0917 | 1.1417 | 4.0004 | 0.7167 | 0.5913 | 2.5    | 0.166  | -0.7418 |
| 4/25/2019 19:05 | 1      | 0.9583 | 3.9793 | 1.0833 | 0.5913 | 2.5    | 0.1686 | -0.7418 |
| 4/25/2019 19:06 | 1      | 0.3917 | 3.2678 | 0.3167 | 0.5913 | 2.5    | 0.1685 | -0.7418 |
| 4/25/2019 19:07 | 1      | 0.4917 | 4.1058 | 0.8    | 0.5913 | 2.5    | 0.1607 | -0.7418 |
| 4/25/2019 19:08 | 1      | 0.6667 | 3.6267 | 0.8167 | 0.5913 | 2.5    | 0.1711 | -0.7418 |
| 4/25/2019 19:09 | 0.9167 | 0.85   | 3.9244 | 0.8    | 0.5913 | 2.5    | 0.1642 | -0.7418 |
| 4/25/2019 19:10 | 0.9    | 0.7583 | 3.8592 | 0.7333 | 0.5913 | 2.5    | 0.1649 | -0.7418 |
| 4/25/2019 19:11 | 0.9    | 0.6333 | 3.8278 | 0.35   | 0.5913 | 2.5    | 0.1716 | -0.7418 |
| 4/25/2019 19:12 | 0.9    | 1.0083 | 3.838  | 0.6167 | 0.5913 | 2.5    | 0.1526 | -0.7418 |
| 4/25/2019 19:13 | 0.9    | 0.1083 | 3.9696 | 0.8    | 0.5913 | 2.5    | 0.1731 | -0.7418 |

|                 |        |         |        |         |        |        |        |         |
|-----------------|--------|---------|--------|---------|--------|--------|--------|---------|
| 4/25/2019 19:14 | 0.8667 | 0.7583  | 3.8245 | 0.7167  | 0.5913 | 2.5    | 0.1702 | -0.7418 |
| 4/25/2019 19:15 | 0.85   | 0.7     | 3.8154 | 0       | 0.5913 | 2.5    | 0.1631 | -0.7418 |
| 4/25/2019 19:16 | 0.7667 | 0.575   | 3.7699 | 0.9333  | 0.5913 | 2.5    | 0.1714 | -0.7418 |
| 4/25/2019 19:17 | 0.7583 | 0.6917  | 3.5066 | 0.3333  | 0.5913 | 2.5545 | 0.1579 | -0.7418 |
| 4/25/2019 19:18 | 0.7083 | 0.4667  | 3.7258 | 0.4333  | 0.5913 | 2.56   | 0.1667 | -0.7418 |
| 4/25/2019 19:19 | 0.775  | 0.3583  | 3.6077 | 0.2667  | 0.5913 | 2.6    | 0.1675 | -0.7418 |
| 4/25/2019 19:20 | 0.725  | 0.8417  | 3.7435 | 0.0833  | 0.5913 | 2.6    | 0.1615 | -0.7418 |
| 4/25/2019 19:21 | 0.7    | 0.5917  | 3.9343 | 0.1667  | 0.5913 | 2.6    | 0.1747 | -0.7418 |
| 4/25/2019 19:22 | 0.7    | 0.6417  | 3.9646 | 0.6167  | 0.5913 | 2.6    | 0.1638 | -0.7418 |
| 4/25/2019 19:23 | 0.7    | 0.2     | 3.4613 | -0.1667 | 0.5913 | 2.6    | 0.162  | -0.7418 |
| 4/25/2019 19:24 | 0.7    | 0       | 3.5158 | -0.4833 | 0.5913 | 2.6    | 0.1708 | -0.7418 |
| 4/25/2019 19:25 | 0.7    | 0.5583  | 3.9453 | 0.3833  | 0.5913 | 2.6818 | 0.1575 | -0.7418 |
| 4/25/2019 19:26 | 0.75   | 0.675   | 3.5963 | 0.6     | 0.5913 | 2.7    | 0.1707 | -0.7418 |
| 4/25/2019 19:27 | 0.8    | 0.9083  | 4.024  | 0.7     | 0.5913 | 2.7    | 0.1604 | -0.7418 |
| 4/25/2019 19:28 | 0.8    | 0.5833  | 3.6767 | 0.3833  | 0.5913 | 2.7    | 0.1673 | -0.7418 |
| 4/25/2019 19:29 | 0.8    | 0.225   | 3.8496 | 0.2167  | 0.5913 | 2.7    | 0.1743 | -0.7418 |
| 4/25/2019 19:30 | 0.7417 | 0.525   | 3.9284 | 0.1333  | 0.5913 | 2.7    | 0.1611 | -0.7418 |
| 4/25/2019 19:31 | 0.8    | 0.3333  | 3.7536 | 0.5167  | 0.5913 | 2.7    | 0.1644 | -0.7418 |
| 4/25/2019 19:32 | 0.8    | 0.875   | 3.638  | 0       | 0.5913 | 2.7    | 0.1629 | -0.7418 |
| 4/25/2019 19:33 | 0.7583 | 0.35    | 3.5173 | 0.3167  | 0.5913 | 2.7    | 0.1618 | -0.7418 |
| 4/25/2019 19:34 | 0.7083 | 0.2417  | 3.6993 | 0.3333  | 0.5913 | 2.7182 | 0.1731 | -0.7418 |
| 4/25/2019 19:35 | 0.7    | 0.65    | 3.4958 | 0.5833  | 0.5913 | 2.8    | 0.1579 | -0.7418 |
| 4/25/2019 19:36 | 0.7    | 0.2083  | 3.5662 | -0.2    | 0.5913 | 2.7    | 0.1709 | -0.7418 |
| 4/25/2019 19:37 | 0.625  | 1.2833  | 3.5544 | 0.4333  | 0.5913 | 2.7    | 0.1629 | -0.7418 |
| 4/25/2019 19:38 | 0.625  | 0.675   | 3.8488 | 0.4     | 0.5913 | 2.7    | 0.164  | -0.7418 |
| 4/25/2019 19:39 | 0.7333 | 0.5583  | 3.6013 | -0.4333 | 0.5913 | 2.7    | 0.1731 | -0.7418 |
| 4/25/2019 19:40 | 0.8    | 0.8417  | 3.4774 | 0.45    | 0.5913 | 2.7364 | 0.1662 | -0.7418 |
| 4/25/2019 19:41 | 0.85   | 0.125   | 3.545  | 0.7     | 0.5913 | 2.8    | 0.1735 | -0.7418 |
| 4/25/2019 19:42 | 0.8833 | 0.0333  | 3.6965 | -0.1833 | 0.5913 | 2.8    | 0.1674 | -0.7418 |
| 4/25/2019 19:43 | 0.875  | 0.3417  | 3.6135 | 0.5667  | 0.5913 | 2.8    | 0.1655 | -0.7418 |
| 4/25/2019 19:44 | 0.8    | 0.5333  | 3.4622 | 0.1333  | 0.5913 | 2.8    | 0.1783 | -0.7418 |
| 4/25/2019 19:45 | 0.8    | 0.35    | 3.4707 | 0.3833  | 0.5913 | 2.8    | 0.1596 | -0.7418 |
| 4/25/2019 19:46 | 0.725  | -0.0167 | 3.4858 | 0.4     | 0.5913 | 2.8    | 0.1694 | -0.7418 |
| 4/25/2019 19:47 | 0.7    | 0.1833  | 3.4754 | 0.0833  | 0.5913 | 2.8    | 0.1719 | -0.7418 |
| 4/25/2019 19:48 | 0.625  | 0.4833  | 3.2213 | -0.25   | 0.5913 | 2.8417 | 0.1634 | -0.7418 |
| 4/25/2019 19:49 | 0.675  | 0.3333  | 3.534  | 0.3167  | 0.5913 | 2.9    | 0.1745 | -0.7418 |
| 4/25/2019 19:50 | 0.7    | 0.7917  | 3.4228 | 0.0833  | 0.5913 | 2.9    | 0.161  | -0.7418 |
| 4/25/2019 19:51 | 0.725  | 0.2417  | 3.1663 | 0.1833  | 0.5913 | 2.9    | 0.1663 | -0.7418 |
| 4/25/2019 19:52 | 0.8    | 0.4833  | 3.4522 | -0.25   | 0.5913 | 2.9    | 0.1762 | -0.7418 |
| 4/25/2019 19:53 | 0.8    | 0.7     | 3.2149 | 0.2667  | 0.5913 | 2.9    | 0.1657 | -0.7418 |
| 4/25/2019 19:54 | 0.8    | -0.1583 | 3.5017 | 0.2833  | 0.5913 | 2.9    | 0.1742 | -0.7418 |
| 4/25/2019 19:55 | 0.725  | 0.05    | 3.187  | -0.0833 | 0.5913 | 2.9    | 0.1696 | -0.7418 |
| 4/25/2019 19:56 | 0.8    | 0.225   | 3.3296 | 0.0167  | 0.5913 | 2.9    | 0.1654 | -0.7418 |
| 4/25/2019 19:57 | 0.7333 | -0.375  | 2.8884 | 0.9833  | 0.5913 | 2.9    | 0.1749 | -0.7418 |
| 4/25/2019 19:58 | 0.7    | -0.2083 | 3.3452 | 0.3167  | 0.5913 | 2.9    | 0.177  | -0.7418 |
| 4/25/2019 19:59 | 0.7    | 0.725   | 3.3492 | 0.1     | 0.5913 | 2.9    | 0.1719 | -0.7418 |
| 4/25/2019 20:00 | 0.7    | 0.3667  | 3.1751 | -0.1667 | 0.5913 | 2.9    | 0.164  | -0.7418 |

|                 |        |         |        |         |        |        |        |         |
|-----------------|--------|---------|--------|---------|--------|--------|--------|---------|
| 4/25/2019 20:01 | 0.7    | -0.35   | 3.4198 | 0.3167  | 0.5913 | 2.9    | 0.1681 | -0.7418 |
| 4/25/2019 20:02 | 0.7    | -0.1667 | 3.2706 | 0.3     | 0.5913 | 2.9    | 0.1704 | -0.7418 |
| 4/25/2019 20:03 | 0.7    | 0.5667  | 3.283  | 0.2     | 0.5913 | 2.92   | 0.1696 | -0.7418 |
| 4/25/2019 20:04 | 0.7417 | 0.625   | 3.422  | 0.65    | 0.5913 | 3      | 0.1746 | -0.7418 |
| 4/25/2019 20:05 | 0.7    | -0.025  | 3.341  | 0.15    | 0.5913 | 3      | 0.1727 | -0.7418 |
| 4/25/2019 20:06 | 0.7    | -0.2083 | 3.3042 | 0.5     | 0.5913 | 3      | 0.167  | -0.7418 |
| 4/25/2019 20:07 | 0.675  | -0.0833 | 3.1358 | 0.0167  | 0.5913 | 3      | 0.1759 | -0.7418 |
| 4/25/2019 20:08 | 0.7    | 0.55    | 3.244  | -0.2333 | 0.5913 | 3      | 0.1661 | -0.7418 |
| 4/25/2019 20:09 | 0.6667 | -0.2583 | 3.0618 | -0.2667 | 0.5913 | 3      | 0.1722 | -0.7418 |
| 4/25/2019 20:10 | 0.6    | -0.0833 | 3.3558 | 0.1833  | 0.5913 | 3      | 0.1763 | -0.7418 |
| 4/25/2019 20:11 | 0.6083 | -0.175  | 2.6982 | 0.5833  | 0.5913 | 3      | 0.1673 | -0.7418 |
| 4/25/2019 20:12 | 0.7    | 0.0667  | 2.9047 | 0.3167  | 0.5913 | 3      | 0.1771 | -0.7418 |
| 4/25/2019 20:13 | 0.7    | -0.275  | 3.258  | -0.2167 | 0.5913 | 3      | 0.166  | -0.7418 |
| 4/25/2019 20:14 | 0.7    | 0.0833  | 3.1253 | 0.9833  | 0.5913 | 3      | 0.1698 | -0.7418 |
| 4/25/2019 20:15 | 0.6667 | -0.625  | 3.014  | 0.4833  | 0.5913 | 2.9818 | 0.178  | -0.7418 |
| 4/25/2019 20:16 | 0.675  | -0.2    | 3.0453 | -0.05   | 0.5913 | 2.97   | 0.1664 | -0.7418 |
| 4/25/2019 20:17 | 0.6    | 0.1417  | 3.1127 | -0.3833 | 0.5913 | 2.9182 | 0.1862 | -0.7418 |
| 4/25/2019 20:18 | 0.6    | 0.525   | 3.107  | -0.55   | 0.5913 | 2.9    | 0.1662 | -0.7418 |
| 4/25/2019 20:19 | 0.6    | -0.2167 | 3.0843 | 0.1     | 0.5913 | 2.9    | 0.1739 | -0.7418 |
| 4/25/2019 20:20 | 0.6    | -0.3333 | 3.303  | 0.2833  | 0.5913 | 2.9    | 0.1762 | -0.7418 |
| 4/25/2019 20:21 | 0.6    | 0.2833  | 3.353  | -0.1667 | 0.5913 | 2.9182 | 0.1652 | -0.7418 |
| 4/25/2019 20:22 | 0.6    | -0.225  | 2.8302 | -0.4167 | 0.5913 | 3      | 0.1748 | -0.7418 |
| 4/25/2019 20:23 | 0.5667 | -0.2083 | 2.9865 | 0.3333  | 0.5913 | 3      | 0.1623 | -0.7418 |
| 4/25/2019 20:24 | 0.5583 | 0.6167  | 3.3093 | -0.4833 | 0.5913 | 3      | 0.1644 | -0.7418 |
| 4/25/2019 20:25 | 0.6    | -0.2917 | 3.2212 | -0.1333 | 0.5913 | 3      | 0.1793 | -0.7418 |
| 4/25/2019 20:26 | 0.6417 | -0.0417 | 2.9378 | 0.3833  | 0.5913 | 3      | 0.1631 | -0.7418 |
| 4/25/2019 20:27 | 0.7    | 0.1917  | 3.112  | 0.1833  | 0.5913 | 3      | 0.1775 | -0.7418 |
| 4/25/2019 20:28 | 0.65   | 0.1833  | 3.2537 | 0.2333  | 0.5913 | 3      | 0.1752 | -0.7418 |
| 4/25/2019 20:29 | 0.5917 | -0.3667 | 3.0972 | 0.2333  | 0.5913 | 3.0636 | 0.1737 | -0.7418 |
| 4/25/2019 20:30 | 0.5    | 0.1667  | 3.4198 | 0.0667  | 0.5913 | 3.0909 | 0.1787 | -0.7418 |
| 4/25/2019 20:31 | 0.5    | -0.2    | 3.1808 | -0.1167 | 0.5913 | 3.1    | 0.1708 | -0.7418 |
| 4/25/2019 20:32 | 0.5    | -0.3083 | 2.9757 | 0.3667  | 0.5913 | 3.1    | 0.1741 | -0.7418 |
| 4/25/2019 20:33 | 0.5    | -0.1    | 3.044  | -0.3167 | 0.5913 | 3.1    | 0.1721 | -0.7418 |
| 4/25/2019 20:34 | 0.5    | 0.4     | 3.158  | -0.3    | 0.5913 | 3.1    | 0.1668 | -0.7418 |
| 4/25/2019 20:35 | 0.5    | -0.2083 | 2.732  | 0.4167  | 0.5913 | 3.1    | 0.1803 | -0.7418 |
| 4/25/2019 20:36 | 0.475  | 0.1667  | 2.9363 | -0.7    | 0.5913 | 3.1    | 0.1695 | -0.7418 |
| 4/25/2019 20:37 | 0.4    | -0.5417 | 3.6445 | -0.0167 | 0.5913 | 3.1636 | 0.1757 | -0.7418 |
| 4/25/2019 20:38 | 0.4    | -0.2333 | 2.9447 | -0.05   | 0.5913 | 3.175  | 0.1757 | -0.7418 |
| 4/25/2019 20:39 | 0.4    | -0.6083 | 3.0045 | -0.2333 | 0.5913 | 3.2    | 0.1618 | -0.7418 |
| 4/25/2019 20:40 | 0.4    | 0.225   | 3.4253 | 0.1     | 0.5913 | 3.14   | 0.1759 | -0.7418 |
| 4/25/2019 20:41 | 0.3583 | 0.0333  | 2.9568 | -0.35   | 0.5913 | 3.1    | 0.1709 | -0.7418 |
| 4/25/2019 20:42 | 0.325  | -0.375  | 3.0808 | 0.4833  | 0.5913 | 3.1    | 0.1791 | -0.7418 |
| 4/25/2019 20:43 | 0.3    | 0.1583  | 3.4548 | 0.2833  | 0.5913 | 3.12   | 0.1772 | -0.7418 |
| 4/25/2019 20:44 | 0.3583 | -0.0583 | 2.8503 | 0.0833  | 0.5913 | 3.2    | 0.167  | -0.7418 |
| 4/25/2019 20:45 | 0.325  | 0.2083  | 3.0387 | 0.6333  | 0.5913 | 3.2    | 0.1746 | -0.7418 |
| 4/25/2019 20:46 | 0.4    | 0.25    | 3.2092 | 0.4167  | 0.5913 | 3.2    | 0.1745 | -0.7418 |
| 4/25/2019 20:47 | 0.4    | -0.325  | 2.9457 | -0.3    | 0.5913 | 3.1364 | 0.1681 | -0.7418 |

|                 |        |         |        |         |        |        |        |         |
|-----------------|--------|---------|--------|---------|--------|--------|--------|---------|
| 4/25/2019 20:48 | 0.4    | 0.275   | 3.0307 | -0.2    | 0.5913 | 3.14   | 0.1803 | -0.7418 |
| 4/25/2019 20:49 | 0.4    | 0.325   | 3.1448 | 0.05    | 0.5913 | 3.17   | 0.1633 | -0.7418 |
| 4/25/2019 20:50 | 0.4    | 0.175   | 3.4043 | -0.1667 | 0.5913 | 3.1364 | 0.1837 | -0.7418 |
| 4/25/2019 20:51 | 0.35   | -0.3833 | 2.9712 | 0.2     | 0.5913 | 3.2    | 0.1787 | -0.7418 |
| 4/25/2019 20:52 | 0.3    | -0.5    | 3.29   | -0.05   | 0.5913 | 3.2    | 0.168  | -0.7418 |
| 4/25/2019 20:53 | 0.2083 | -0.3583 | 3.3037 | 0       | 0.5913 | 3.2    | 0.1751 | -0.7418 |
| 4/25/2019 20:54 | 0.2    | -0.0083 | 3.1938 | 0.1833  | 0.5913 | 3.2    | 0.1703 | -0.7418 |
| 4/25/2019 20:55 | 0.2083 | -0.0167 | 3.509  | -0.0833 | 0.5913 | 3.2    | 0.1738 | -0.7418 |
| 4/25/2019 20:56 | 0.275  | -0.325  | 3.0322 | -0.4333 | 0.5913 | 3.2    | 0.1814 | -0.7418 |
| 4/25/2019 20:57 | 0.3167 | 0.2     | 3.29   | -0.35   | 0.5913 | 3.2    | 0.1683 | -0.7418 |
| 4/25/2019 20:58 | 0.4    | 0.1333  | 3.2207 | 0.4     | 0.5913 | 3.2    | 0.1831 | -0.7418 |
| 4/25/2019 20:59 | 0.4    | -0.05   | 3.41   | -0.4667 | 0.5913 | 3.2    | 0.1709 | -0.7418 |
| 4/25/2019 21:00 | 0.4    | 0.625   | 3.1353 | -0.5667 | 0.5913 | 3.2    | 0.1705 | -0.7418 |
| 4/25/2019 21:01 | 0.3833 | -0.0917 | 2.901  | -0.5833 | 0.5913 | 3.2    | 0.1818 | -0.7418 |
| 4/25/2019 21:02 | 0.3    | -0.5    | 3.1188 | -0.05   | 0.5913 | 3.2    | 0.162  | -0.7418 |
| 4/25/2019 21:03 | 0.3    | -1.0167 | 3.2097 | -0.9    | 0.5913 | 3.1455 | 0.1807 | -0.7418 |
| 4/25/2019 21:04 | 0.3    | 0.35    | 3.1185 | -0.75   | 0.5913 | 3.1    | 0.177  | -0.7418 |
| 4/25/2019 21:05 | 0.3    | 0.25    | 2.9278 | -0.3    | 0.5913 | 3.1    | 0.1662 | -0.7418 |
| 4/25/2019 21:06 | 0.3083 | 0.35    | 2.9215 | -0.15   | 0.5913 | 3.1    | 0.186  | -0.7418 |
| 4/25/2019 21:07 | 0.35   | -0.6    | 3.0425 | 0.0667  | 0.5913 | 3.1    | 0.1701 | -0.7418 |
| 4/25/2019 21:08 | 0.3333 | -0.0833 | 2.878  | -0.1667 | 0.5913 | 3.11   | 0.1784 | -0.7418 |
| 4/25/2019 21:09 | 0.3    | -0.1167 | 3.0398 | 0.3167  | 0.5913 | 3.2    | 0.1767 | -0.7418 |
| 4/25/2019 21:10 | 0.3    | -0.4583 | 2.8807 | -0.5333 | 0.5913 | 3.2    | 0.168  | -0.7418 |
| 4/25/2019 21:11 | 0.3    | 0.1667  | 3.0632 | 0.05    | 0.5913 | 3.2    | 0.1778 | -0.7418 |
| 4/25/2019 21:12 | 0.2583 | 0.1667  | 3.095  | -0.2167 | 0.5913 | 3.2    | 0.164  | -0.7418 |
| 4/25/2019 21:13 | 0.2    | 0.7667  | 3.0948 | -0.0667 | 0.5913 | 3.2    | 0.175  | -0.7418 |
| 4/25/2019 21:14 | 0.2    | -0.1583 | 3.3457 | 0.1     | 0.5913 | 3.2    | 0.1727 | -0.7418 |
| 4/25/2019 21:15 | 0.2833 | 0.125   | 3.2062 | -0.3667 | 0.5913 | 3.2    | 0.1661 | -0.7418 |
| 4/25/2019 21:16 | 0.3    | 0.8333  | 3.1235 | 0.05    | 0.5913 | 3.28   | 0.1866 | -0.7418 |
| 4/25/2019 21:17 | 0.3083 | -0.175  | 2.9057 | -0.8    | 0.5913 | 3.3    | 0.1735 | -0.7418 |
| 4/25/2019 21:18 | 0.3083 | -0.525  | 3.1945 | 0.2167  | 0.5913 | 3.3    | 0.1823 | -0.7418 |
| 4/25/2019 21:19 | 0.4    | 0.1667  | 3.027  | -0.0167 | 0.5913 | 3.3    | 0.176  | -0.7418 |
| 4/25/2019 21:20 | 0.4    | -0.5083 | 2.9395 | 0.2667  | 0.5913 | 3.3    | 0.1722 | -0.7418 |
| 4/25/2019 21:21 | 0.4    | 0.475   | 2.1857 | 0.2667  | 0.5913 | 3.3    | 0.1863 | -0.7418 |
| 4/25/2019 21:22 | 0.4    | -0.075  | 2.9948 | -0.1833 | 0.5913 | 3.3    | 0.1726 | -0.7418 |
| 4/25/2019 21:23 | 0.4167 | 0.075   | 3.1162 | 0.0667  | 0.5913 | 3.3    | 0.1792 | -0.7418 |
| 4/25/2019 21:24 | 0.4083 | 0.025   | 2.8568 | 0.15    | 0.5913 | 3.3    | 0.1776 | -0.7418 |
| 4/25/2019 21:25 | 0.4    | -0.2167 | 3.1585 | -0.15   | 0.5913 | 3.32   | 0.1689 | -0.7418 |
| 4/25/2019 21:26 | 0.475  | 0.2417  | 3.1535 | -0.0667 | 0.5913 | 3.3222 | 0.182  | -0.7418 |
| 4/25/2019 21:27 | 0.5    | -0.225  | 3.0538 | 0.2     | 0.5913 | 3.3    | 0.1695 | -0.7418 |
| 4/25/2019 21:28 | 0.5    | -0.4583 | 3.0063 | -0.3667 | 0.5913 | 3.3    | 0.1798 | -0.7418 |
| 4/25/2019 21:29 | 0.425  | -0.925  | 3.2472 | 0.0667  | 0.5913 | 3.3    | 0.1804 | -0.7418 |
| 4/25/2019 21:30 | 0.3417 | -0.3083 | 2.6042 | -0.0167 | 0.5913 | 3.3    | 0.1657 | -0.7418 |
| 4/25/2019 21:31 | 0.3    | 0.1583  | 3.0057 | -0.2333 | 0.5913 | 3.3    | 0.1818 | -0.7418 |
| 4/25/2019 21:32 | 0.3083 | -0.2167 | 3.2592 | -0.5    | 0.5913 | 3.3667 | 0.1715 | -0.7418 |
| 4/25/2019 21:33 | 0.375  | -0.0333 | 3.175  | 0.4167  | 0.5913 | 3.4    | 0.1773 | -0.7418 |
| 4/25/2019 21:34 | 0.4    | -0.4583 | 3.0202 | -0.5167 | 0.5913 | 3.4    | 0.1808 | -0.7418 |



|                 |        |         |        |         |        |        |        |         |
|-----------------|--------|---------|--------|---------|--------|--------|--------|---------|
| 4/25/2019 21:35 | 0.4    | -0.0833 | 3.1818 | -0.0167 | 0.5913 | 3.4636 | 0.1673 | -0.7418 |
| 4/25/2019 21:36 | 0.4    | -0.1833 | 3.3549 | -0.0667 | 0.5913 | 3.6    | 0.1861 | -0.7418 |
| 4/25/2019 21:37 | 0.4    | 0.275   | 3.0273 | -0.2167 | 0.5913 | 3.6    | 0.1747 | -0.7418 |
| 4/25/2019 21:38 | 0.4167 | 0.3167  | 3.0838 | -0.0667 | 0.5913 | 3.6    | 0.173  | -0.7418 |
| 4/25/2019 21:39 | 0.4    | 0.6833  | 2.9194 | -0.0667 | 0.5913 | 3.7    | 0.1832 | -0.7418 |
| 4/25/2019 21:40 | 0.4    | 0.05    | 3.1917 | 0.4     | 0.5913 | 3.7    | 0.165  | -0.7418 |
| 4/25/2019 21:41 | 0.4167 | 0.0833  | 2.7438 | 0.0167  | 0.5913 | 3.7    | 0.1804 | -0.7418 |
| 4/25/2019 21:42 | 0.4    | -0.1333 | 2.8538 | 0.6667  | 0.5913 | 3.7    | 0.1704 | -0.7418 |
| 4/25/2019 21:43 | 0.35   | 0.1     | 2.7743 | 0.0667  | 0.5913 | 3.7    | 0.1702 | -0.7418 |
| 4/25/2019 21:44 | 0.35   | -0.725  | 2.9262 | -0.1167 | 0.5913 | 3.7    | 0.1784 | -0.7418 |
| 4/25/2019 21:45 | 0.3583 | -0.0667 | 3.2139 | -0.2667 | 0.5913 | 3.7    | 0.1682 | -0.7418 |
| 4/25/2019 21:46 | 0.3583 | -0.35   | 3.2119 | -0.4167 | 0.5913 | 3.7    | 0.1743 | -0.7418 |
| 4/25/2019 21:47 | 0.275  | -0.375  | 3.3102 | -0.9667 | 0.5913 | 3.68   | 0.176  | -0.7418 |
| 4/25/2019 21:48 | 0.2833 | -0.125  | 3.3402 | 0.3667  | 0.5913 | 3.5091 | 0.1695 | -0.7418 |
| 4/25/2019 21:49 | 0.3    | -0.0167 | 2.8583 | 0.35    | 0.5913 | 3.5    | 0.1816 | -0.7418 |
| 4/25/2019 21:50 | 0.3    | -0.1083 | 3.1396 | -0.35   | 0.5913 | 3.5    | 0.167  | -0.7418 |
| 4/25/2019 21:51 | 0.3667 | -0.4333 | 3.2033 | -0.15   | 0.5913 | 3.5    | 0.1723 | -0.7418 |
| 4/25/2019 21:52 | 0.4    | -0.075  | 2.9716 | 0       | 0.5913 | 3.5    | 0.1756 | -0.7418 |
| 4/25/2019 21:53 | 0.4917 | 0.4417  | 2.9443 | -0.2667 | 0.5913 | 3.5    | 0.1691 | -0.7418 |
| 4/25/2019 21:54 | 0.5    | 0.45    | 3.0373 | -0.5    | 0.5913 | 3.5    | 0.1839 | -0.7418 |
| 4/25/2019 21:55 | 0.5    | 0.4583  | 3.0164 | -0.25   | 0.5913 | 3.5    | 0.1666 | -0.7418 |
| 4/25/2019 21:56 | 0.475  | -0.5417 | 3.2428 | 0.4833  | 0.5913 | 3.5    | 0.179  | -0.7418 |
| 4/25/2019 21:57 | 0.4167 | -0.7083 | 2.9169 | -0.35   | 0.5913 | 3.5    | 0.1856 | -0.7418 |
| 4/25/2019 21:58 | 0.4    | -0.0167 | 2.4846 | 0.1167  | 0.5913 | 3.5083 | 0.1648 | -0.7418 |
| 4/25/2019 21:59 | 0.4167 | -0.3417 | 2.7028 | -0.1333 | 0.5913 | 3.58   | 0.1793 | -0.7418 |
| 4/25/2019 22:00 | 0.5    | -0.0583 | 3.1514 | 0.0167  | 0.5913 | 3.5    | 0.1607 | -0.7418 |
| 4/25/2019 22:01 | 0.5    | 0.4417  | 2.6354 | -0.0167 | 0.5913 | 3.5    | 0.1693 | -0.7418 |
| 4/25/2019 22:02 | 0.5    | 0.1583  | 3.0631 | -0.1667 | 0.5913 | 3.5    | 0.1818 | -0.7418 |
| 4/25/2019 22:03 | 0.5    | -0.275  | 3.2232 | 0.0167  | 0.5913 | 3.5    | 0.1649 | -0.7418 |
| 4/25/2019 22:04 | 0.5    | 0.6833  | 3.0858 | -0.4667 | 0.5913 | 3.5    | 0.178  | -0.7418 |
| 4/25/2019 22:05 | 0.5    | 0.1917  | 2.9013 | -0.1    | 0.5913 | 3.5    | 0.1809 | -0.7418 |
| 4/25/2019 22:06 | 0.5    | 0.0667  | 3.2011 | 0.0167  | 0.5913 | 3.5111 | 0.1749 | -0.7418 |
| 4/25/2019 22:07 | 0.5    | 0.2083  | 2.9059 | -0.4333 | 0.5913 | 3.6    | 0.176  | -0.7418 |
| 4/25/2019 22:08 | 0.5    | 0.1     | 2.9922 | -0.5833 | 0.5913 | 3.6    | 0.1701 | -0.7418 |
| 4/25/2019 22:09 | 0.5    | -0.2583 | 2.9612 | -0.05   | 0.5913 | 3.6    | 0.1795 | -0.7418 |
| 4/25/2019 22:10 | 0.5    | 0.0583  | 3.2693 | -0.5333 | 0.5913 | 3.6    | 0.1739 | -0.7418 |
| 4/25/2019 22:11 | 0.5    | -0.075  | 2.7267 | -0.35   | 0.5913 | 3.6    | 0.1665 | -0.7418 |
| 4/25/2019 22:12 | 0.5333 | 0.6833  | 2.9564 | 0.1167  | 0.5913 | 3.6    | 0.1824 | -0.7418 |
| 4/25/2019 22:13 | 0.6    | 0.075   | 3.0053 | -0.0333 | 0.5913 | 3.6    | 0.1636 | -0.7418 |
| 4/25/2019 22:14 | 0.6    | -0.1333 | 2.9393 | -0.3    | 0.5913 | 3.6    | 0.1805 | -0.7418 |
| 4/25/2019 22:15 | 0.5917 | 0.5333  | 3.2216 | -0.55   | 0.5913 | 3.6    | 0.1762 | -0.7418 |
| 4/25/2019 22:16 | 0.5    | -0.4833 | 3.1123 | -0.0833 | 0.5913 | 3.6    | 0.1663 | -0.7418 |
| 4/25/2019 22:17 | 0.5    | 0.3833  | 2.6593 | -0.2333 | 0.5913 | 3.6    | 0.1772 | -0.7418 |
| 4/25/2019 22:18 | 0.5    | -0.6333 | 2.9046 | -0.8333 | 0.5913 | 3.6    | 0.1637 | -0.7418 |
| 4/25/2019 22:19 | 0.5    | -0.0167 | 2.9367 | 0.1667  | 0.5913 | 3.6    | 0.1752 | -0.7418 |
| 4/25/2019 22:20 | 0.4417 | -0.2333 | 2.9889 | -0.3333 | 0.5913 | 3.6778 | 0.1767 | -0.7418 |
| 4/25/2019 22:21 | 0.4333 | -0.125  | 2.7017 | -0.85   | 0.5913 | 3.7    | 0.164  | -0.7418 |

|                 |        |         |        |         |        |        |        |         |
|-----------------|--------|---------|--------|---------|--------|--------|--------|---------|
| 4/25/2019 22:22 | 0.4    | -0.35   | 3.0356 | -0.8667 | 0.5913 | 3.7    | 0.1779 | -0.7418 |
| 4/25/2019 22:23 | 0.3636 | -0.1167 | 3.3841 | -0.4333 | 0.5913 | 3.62   | 0.1648 | -0.7418 |
| 4/25/2019 22:24 | 0.3    | -0.0333 | 2.8473 | 0.1     | 0.5913 | 3.6545 | 0.17   | -0.7418 |
| 4/25/2019 22:25 | 0.3    | -0.275  | 2.9061 | -0.25   | 0.5913 | 3.65   | 0.1788 | -0.7418 |
| 4/25/2019 22:26 | 0.3    | -0.6833 | 2.8483 | -0.2667 | 0.5913 | 3.7    | 0.1664 | -0.7418 |
| 4/25/2019 22:27 | 0.3    | 0.475   | 2.9637 | 0.0667  | 0.5913 | 3.7    | 0.1742 | -0.7418 |
| 4/25/2019 22:28 | 0.325  | 0.4583  | 3.2919 | 0       | 0.5913 | 3.7    | 0.1679 | -0.7418 |
| 4/25/2019 22:29 | 0.4    | -0.45   | 2.8898 | -0.3333 | 0.5913 | 3.7    | 0.1696 | -0.7418 |
| 4/25/2019 22:30 | 0.4    | -0.3667 | 3.0946 | -0.2    | 0.5913 | 3.6545 | 0.1788 | -0.7418 |
| 4/25/2019 22:31 | 0.4    | -0.2583 | 2.8194 | 0.1333  | 0.5913 | 3.6    | 0.1647 | -0.7418 |
| 4/25/2019 22:32 | 0.4    | 0.6917  | 2.7207 | 0       | 0.5913 | 3.6    | 0.1728 | -0.7418 |
| 4/25/2019 22:33 | 0.4    | -0.2    | 2.8758 | -0.1667 | 0.5913 | 3.6    | 0.1703 | -0.7418 |
| 4/25/2019 22:34 | 0.4417 | 0.2667  | 2.3133 | -0.3833 | 0.5913 | 3.6    | 0.1678 | -0.7418 |
| 4/25/2019 22:35 | 0.4    | 0.25    | 2.8177 | 0.0167  | 0.5913 | 3.5167 | 0.1759 | -0.7418 |
| 4/25/2019 22:36 | 0.3833 | 0.25    | 2.7559 | -0.15   | 0.5913 | 3.5    | 0.1636 | -0.7418 |
| 4/25/2019 22:37 | 0.3    | -0.1833 | 2.8232 | 0.3167  | 0.5913 | 3.5    | 0.1721 | -0.7418 |
| 4/25/2019 22:38 | 0.3    | 0.5583  | 2.8709 | -0.1667 | 0.5913 | 3.5    | 0.1738 | -0.7418 |
| 4/25/2019 22:39 | 0.3    | -0.2083 | 2.9635 | -0.15   | 0.5913 | 3.5091 | 0.1614 | -0.7418 |
| 4/25/2019 22:40 | 0.3    | -0.875  | 3.1271 | -0.05   | 0.5913 | 3.6    | 0.1764 | -0.7418 |
| 4/25/2019 22:41 | 0.2917 | -0.0417 | 2.9083 | -0.1167 | 0.5913 | 3.6    | 0.1634 | -0.7418 |
| 4/25/2019 22:42 | 0.2833 | 0.0333  | 3.0705 | -0.3667 | 0.5913 | 3.6    | 0.1669 | -0.7418 |
| 4/25/2019 22:43 | 0.3    | 0.525   | 2.3625 | -0.2667 | 0.5913 | 3.6    | 0.1754 | -0.7418 |
| 4/25/2019 22:44 | 0.3    | -0.1917 | 2.4495 | -0.25   | 0.5913 | 3.65   | 0.1686 | -0.7418 |
| 4/25/2019 22:45 | 0.3    | -0.4    | 2.9192 | -0.5667 | 0.5913 | 3.7    | 0.1687 | -0.7418 |
| 4/25/2019 22:46 | 0.3    | 0.325   | 2.307  | -0.5833 | 0.5913 | 3.7    | 0.1613 | -0.7418 |
| 4/25/2019 22:47 | 0.2917 | 0.5583  | 2.6031 | -0.75   | 0.5913 | 3.7909 | 0.175  | -0.7418 |
| 4/25/2019 22:48 | 0.2083 | -0.2083 | 2.7097 | -0.85   | 0.5913 | 3.9083 | 0.1706 | -0.7418 |
| 4/25/2019 22:49 | 0.2    | 0.2667  | 2.5833 | -0.8333 | 0.5913 | 4      | 0.1688 | -0.7418 |
| 4/25/2019 22:50 | 0.2    | 0.0667  | 2.701  | -0.6333 | 0.5913 | 4      | 0.1745 | -0.7418 |
| 4/25/2019 22:51 | 0.2    | 0.225   | 2.2831 | -0.6333 | 0.5913 | 4      | 0.1612 | -0.7418 |
| 4/25/2019 22:52 | 0.2    | -0.8083 | 2.5906 | -0.7667 | 0.5913 | 4      | 0.1756 | -0.7418 |
| 4/25/2019 22:53 | 0.2    | -0.3    | 2.5713 | -0.3    | 0.5913 | 4      | 0.1703 | -0.7418 |
| 4/25/2019 22:54 | 0.2    | 0.1583  | 2.5638 | -0.2167 | 0.5913 | 4      | 0.168  | -0.7418 |
| 4/25/2019 22:55 | 0.2    | -0.7583 | 2.7567 | -0.2833 | 0.5913 | 4.0333 | 0.1784 | -0.7418 |
| 4/25/2019 22:56 | 0.2    | 0       | 2.4465 | 0.0667  | 0.5913 | 4.1    | 0.1654 | -0.7418 |
| 4/25/2019 22:57 | 0.2    | -0.575  | 2.7715 | 0.0833  | 0.5913 | 4.225  | 0.1756 | -0.7418 |
| 4/25/2019 22:58 | 0.2    | -0.1333 | 2.6108 | -0.5333 | 0.5913 | 4.4    | 0.1658 | -0.7418 |
| 4/25/2019 22:59 | 0.2    | 0.0417  | 2.6248 | 0.15    | 0.5913 | 4.4    | 0.1634 | -0.7418 |
| 4/25/2019 23:00 | 0.25   | -0.0917 | 2.7368 | -0.15   | 0.5913 | 4.3273 | 0.1803 | -0.7418 |
| 4/25/2019 23:01 | 0.2083 | 0.4     | 2.5287 | 0.05    | 0.5913 | 4.3    | 0.1622 | -0.7418 |
| 4/25/2019 23:02 | 0.2667 | -1.2917 | 2.3643 | -0.25   | 0.5913 | 4.3    | 0.1752 | -0.7418 |
| 4/25/2019 23:03 | 0.2    | 0.3917  | 2.3535 | -0.0333 | 0.5913 | 4.3    | 0.1619 | -0.7418 |
| 4/25/2019 23:04 | 0.2    | -0.1583 | 2.1823 | -0.55   | 0.5913 | 4.3    | 0.1621 | -0.7418 |
| 4/25/2019 23:05 | 0.2    | 0.3833  | 2.6425 | -0.1    | 0.5913 | 4.3    | 0.177  | -0.7418 |
| 4/25/2019 23:06 | 0.2    | -0.5417 | 2.6803 | 0.3667  | 0.5913 | 4.3    | 0.1616 | -0.7418 |
| 4/25/2019 23:07 | 0.1    | -0.475  | 2.6467 | 0.3167  | 0.5913 | 4.2909 | 0.1754 | -0.7418 |
| 4/25/2019 23:08 | 0.1    | -0.65   | 2.6147 | -0.15   | 0.5913 | 4.2    | 0.1728 | -0.7418 |

|                 |        |         |        |         |        |        |        |         |
|-----------------|--------|---------|--------|---------|--------|--------|--------|---------|
| 4/25/2019 23:09 | 0.1    | -0.45   | 2.5428 | -0.4    | 0.5913 | 4.175  | 0.1664 | -0.7418 |
| 4/25/2019 23:10 | 0.1    | -0.4167 | 2.5545 | -0.25   | 0.5913 | 3.9    | 0.1763 | -0.7418 |
| 4/25/2019 23:11 | 0.1    | -0.6583 | 2.745  | -0.35   | 0.5913 | 3.9    | 0.1628 | -0.7418 |
| 4/25/2019 23:12 | 0.1    | -0.5333 | 2.3875 | -0.2167 | 0.5913 | 3.9    | 0.1737 | -0.7418 |
| 4/25/2019 23:13 | 0.1    | -0.4    | 2.6995 | -0.3    | 0.5913 | 3.9    | 0.1695 | -0.7418 |
| 4/25/2019 23:14 | 0.1    | -0.7667 | 2.8453 | -0.5333 | 0.5913 | 3.9    | 0.1654 | -0.7418 |
| 4/25/2019 23:15 | 0.1    | -0.7083 | 2.8132 | -0.7167 | 0.5913 | 3.9    | 0.1753 | -0.7418 |
| 4/25/2019 23:16 | 0.1    | -0.1583 | 2.5072 | 0.05    | 0.5913 | 3.9    | 0.1629 | -0.7418 |
| 4/25/2019 23:17 | 0.1    | -0.4917 | 2.6928 | -0.3    | 0.5913 | 3.9    | 0.1748 | -0.7418 |
| 4/25/2019 23:18 | 0.1    | -0.6167 | 2.53   | -0.3333 | 0.5913 | 3.9273 | 0.1774 | -0.7418 |
| 4/25/2019 23:19 | 0.1    | -0.75   | 2.2873 | -0.4    | 0.5913 | 4      | 0.1547 | -0.7418 |
| 4/25/2019 23:20 | 0.1083 | -0.3    | 2.5207 | -0.5333 | 0.5913 | 4      | 0.1755 | -0.7418 |
| 4/25/2019 23:21 | 0.1667 | -0.525  | 2.3702 | -0.5333 | 0.5913 | 4      | 0.1745 | -0.7418 |
| 4/25/2019 23:22 | 0.1833 | -0.275  | 2.7283 | -0.2167 | 0.5913 | 4      | 0.1603 | -0.7418 |
| 4/25/2019 23:23 | 0.2    | -0.0333 | 2.6227 | -0.2667 | 0.5913 | 4      | 0.1782 | -0.7418 |
| 4/25/2019 23:24 | 0.2    | -0.8083 | 2.2275 | -0.4    | 0.5913 | 4      | 0.1581 | -0.7418 |
| 4/25/2019 23:25 | 0.2    | -0.1333 | 2.4715 | -0.1333 | 0.5913 | 4      | 0.1687 | -0.7418 |
| 4/25/2019 23:26 | 0.2    | -0.5083 | 2.473  | -0.35   | 0.5913 | 4      | 0.1668 | -0.7418 |
| 4/25/2019 23:27 | 0.2    | -0.1333 | 2.4093 | -0.4333 | 0.5913 | 4      | 0.1639 | -0.7418 |
| 4/25/2019 23:28 | 0.2    | 0.0417  | 2.4113 | -0.45   | 0.5913 | 4.03   | 0.1768 | -0.7418 |
| 4/25/2019 23:29 | 0.2    | 0.2     | 2.4053 | 0.0167  | 0.5913 | 4      | 0.1672 | -0.7418 |
| 4/25/2019 23:30 | 0.1583 | 0.0667  | 2.3217 | -0.4167 | 0.5913 | 4.0917 | 0.1722 | -0.7418 |
| 4/25/2019 23:31 | 0.1    | -0.2083 | 2.869  | -0.1167 | 0.5913 | 4.1    | 0.1708 | -0.7418 |
| 4/25/2019 23:32 | 0.0917 | 0.0917  | 2.875  | -0.1667 | 0.5913 | 4.1    | 0.1631 | -0.7418 |
| 4/25/2019 23:33 | 0.0833 | -0.1083 | 2.3867 | -0.4    | 0.5913 | 4.1    | 0.1758 | -0.7418 |
| 4/25/2019 23:34 | 0.1    | 0.0417  | 2.8132 | -0.75   | 0.5913 | 4.1167 | 0.1608 | -0.7418 |
| 4/25/2019 23:35 | 0.1    | -0.3167 | 2.6165 | -0.45   | 0.5913 | 4.2    | 0.1675 | -0.7418 |
| 4/25/2019 23:36 | 0.1    | -0.0333 | 2.5935 | -0.4167 | 0.5913 | 4.2    | 0.1738 | -0.7418 |
| 4/25/2019 23:37 | 0.0917 | 0.0417  | 2.4873 | -0.6667 | 0.5913 | 4.2    | 0.1621 | -0.7418 |
| 4/25/2019 23:38 | 0.1    | -0.2917 | 2.8403 | -0.2    | 0.5913 | 4.2    | 0.1699 | -0.7418 |
| 4/25/2019 23:39 | 0.1    | 0.375   | 2.7027 | -0.45   | 0.5913 | 4.2    | 0.1659 | -0.7418 |
| 4/25/2019 23:40 | 0.1667 | -0.225  | 2.5497 | -0.3167 | 0.5913 | 4.2    | 0.1636 | -0.7418 |
| 4/25/2019 23:41 | 0.2    | -0.1667 | 2.6553 | -0.25   | 0.5913 | 4.2    | 0.1721 | -0.7418 |
| 4/25/2019 23:42 | 0.2333 | -0.2083 | 2.8618 | -0.25   | 0.5913 | 4.2    | 0.1606 | -0.7418 |
| 4/25/2019 23:43 | 0.2    | 0.3333  | 2.6073 | -0.1833 | 0.5913 | 4.1545 | 0.175  | -0.7418 |
| 4/25/2019 23:44 | 0.2    | 0.1917  | 2.4692 | -0.7333 | 0.5913 | 4.1    | 0.1643 | -0.7418 |
| 4/25/2019 23:45 | 0.2    | 0.0167  | 2.9703 | 0.1833  | 0.5913 | 4.1    | 0.1557 | -0.7418 |
| 4/25/2019 23:46 | 0.2083 | -0.125  | 2.6802 | -0.3667 | 0.5913 | 4.1    | 0.1733 | -0.7418 |
| 4/25/2019 23:47 | 0.2417 | -0.1    | 2.7093 | 0.0833  | 0.5913 | 4.1    | 0.1574 | -0.7418 |
| 4/25/2019 23:48 | 0.2    | -0.6333 | 2.7957 | -0.4333 | 0.5913 | 4.1    | 0.1717 | -0.7418 |
| 4/25/2019 23:49 | 0.2    | -0.225  | 3.0375 | -0.4333 | 0.5913 | 4.1    | 0.1767 | -0.7418 |
| 4/25/2019 23:50 | 0.2    | -0.1333 | 2.5795 | -0.5667 | 0.5913 | 4.1    | 0.1616 | -0.7418 |
| 4/25/2019 23:51 | 0.2    | -0.1083 | 2.8285 | -0.4    | 0.5913 | 4.1    | 0.1777 | -0.7418 |
| 4/25/2019 23:52 | 0.2167 | -0.6167 | 2.8548 | -0.6333 | 0.5913 | 4.1    | 0.1604 | -0.7418 |
| 4/25/2019 23:53 | 0.3    | -0.025  | 2.6417 | -0.2    | 0.5913 | 4.1    | 0.1775 | -0.7418 |
| 4/25/2019 23:54 | 0.275  | -0.3833 | 2.5172 | -0.5333 | 0.5913 | 4.1    | 0.1689 | -0.7418 |
| 4/25/2019 23:55 | 0.3    | -0.4417 | 2.6393 | -0.4167 | 0.5913 | 4.1    | 0.1586 | -0.7418 |

|                 |        |         |        |         |        |        |        |         |
|-----------------|--------|---------|--------|---------|--------|--------|--------|---------|
| 4/25/2019 23:56 | 0.3    | 0.0667  | 2.5032 | 0.3167  | 0.5913 | 4.1    | 0.1723 | -0.7418 |
| 4/25/2019 23:57 | 0.3    | 0.0667  | 2.5995 | -0.25   | 0.5913 | 4.1    | 0.1597 | -0.7418 |
| 4/25/2019 23:58 | 0.3    | -0.575  | 2.446  | -0.5833 | 0.5913 | 4.1    | 0.1724 | -0.7418 |
| 4/25/2019 23:59 | 0.3    | -1.15   | 2.6865 | -0.4333 | 0.5913 | 4.1    | 0.1697 | -0.7418 |
| 4/26/2019 0:00  | 0.3    | -0.25   | 2.8428 | -0.1    | 0.5913 | 4.1    | 0.1622 | -0.7418 |
| 4/26/2019 0:01  | 0.3667 | 0.4417  | 2.171  | 0.1     | 0.5913 | 4.0417 | 0.1697 | -0.7418 |
| 4/26/2019 0:02  | 0.3333 | -0.3917 | 2.4885 | 0.35    | 0.5913 | 4      | 0.1578 | -0.7418 |
| 4/26/2019 0:03  | 0.3    | 0.2333  | 2.4267 | 0.0333  | 0.5913 | 4      | 0.1634 | -0.7418 |
| 4/26/2019 0:04  | 0.3    | 0.225   | 2.5267 | 0.0667  | 0.5913 | 4      | 0.1689 | -0.7418 |
| 4/26/2019 0:05  | 0.2417 | -0.2333 | 2.8807 | -0.1    | 0.5913 | 4      | 0.1642 | -0.7418 |
| 4/26/2019 0:06  | 0.2    | -0.2    | 2.8912 | -0.3    | 0.5913 | 3.9636 | 0.175  | -0.7418 |
| 4/26/2019 0:07  | 0.2    | -1.3333 | 2.4283 | -0.1    | 0.5913 | 3.9    | 0.1629 | -0.7418 |
| 4/26/2019 0:08  | 0.2    | -0.35   | 2.6142 | -0.65   | 0.5913 | 3.9    | 0.1711 | -0.7418 |
| 4/26/2019 0:09  | 0.275  | -0.475  | 2.7333 | 0.0167  | 0.5913 | 3.9    | 0.1684 | -0.7418 |
| 4/26/2019 0:10  | 0.3    | -0.1167 | 2.7827 | -0.6    | 0.5913 | 3.9    | 0.1647 | -0.7418 |
| 4/26/2019 0:11  | 0.2917 | 0.1167  | 2.5595 | -0.1    | 0.5913 | 3.9    | 0.169  | -0.7418 |
| 4/26/2019 0:12  | 0.3    | -0.225  | 2.6278 | -0.1167 | 0.5913 | 3.9    | 0.1663 | -0.7418 |
| 4/26/2019 0:13  | 0.2417 | -0.0083 | 2.426  | -0.35   | 0.5913 | 3.9    | 0.1655 | -0.7418 |
| 4/26/2019 0:14  | 0.2583 | -0.6083 | 2.5435 | -0.0333 | 0.5913 | 3.9    | 0.1767 | -0.7418 |
| 4/26/2019 0:15  | 0.2583 | -0.3667 | 2.4538 | -0.5    | 0.5913 | 3.85   | 0.1595 | -0.7418 |
| 4/26/2019 0:16  | 0.3    | -0.5583 | 2.3043 | -0.1    | 0.5913 | 3.8    | 0.1686 | -0.7418 |
| 4/26/2019 0:17  | 0.3    | 0.0583  | 2.5418 | 0.0167  | 0.5913 | 3.8    | 0.1647 | -0.7418 |
| 4/26/2019 0:18  | 0.3    | 0.3583  | 2.363  | -0.0667 | 0.5913 | 3.8    | 0.1631 | -0.7418 |
| 4/26/2019 0:19  | 0.3    | 0.3583  | 2.4353 | -0.1167 | 0.5913 | 3.7455 | 0.173  | -0.7418 |
| 4/26/2019 0:20  | 0.3167 | -0.5083 | 2.406  | -0.35   | 0.5913 | 3.7    | 0.1572 | -0.7418 |
| 4/26/2019 0:21  | 0.3917 | 0.25    | 2.2492 | -0.3167 | 0.5913 | 3.7    | 0.1695 | -0.7418 |
| 4/26/2019 0:22  | 0.4    | -0.6667 | 2.6252 | -0.0333 | 0.5913 | 3.7    | 0.1636 | -0.7418 |
| 4/26/2019 0:23  | 0.3333 | 0.4083  | 2.5435 | -0.3    | 0.5913 | 3.7    | 0.157  | -0.7418 |
| 4/26/2019 0:24  | 0.2083 | 0.1417  | 2.6545 | -0.0167 | 0.5913 | 3.7    | 0.1712 | -0.7418 |
| 4/26/2019 0:25  | 0.1167 | -0.05   | 2.3897 | 0.1     | 0.5913 | 3.7    | 0.1552 | -0.7418 |
| 4/26/2019 0:26  | 0.1    | 0.0333  | 2.6137 | -0.1    | 0.5913 | 3.7    | 0.1662 | -0.7418 |
| 4/26/2019 0:27  | 0.1    | 0.4167  | 2.429  | 0.0667  | 0.5913 | 3.76   | 0.1653 | -0.7418 |
| 4/26/2019 0:28  | 0.1    | -0.0333 | 2.5843 | 0.2833  | 0.5913 | 3.8    | 0.159  | -0.7418 |
| 4/26/2019 0:29  | 0.1083 | 0.025   | 2.6203 | 0.5     | 0.5913 | 3.8    | 0.1701 | -0.7418 |
| 4/26/2019 0:30  | 0.2    | 0.075   | 2.7712 | 0.2833  | 0.5913 | 3.9    | 0.1576 | -0.7418 |
| 4/26/2019 0:31  | 0.2583 | -0.475  | 2.2263 | -0.2333 | 0.5913 | 3.9    | 0.173  | -0.7418 |
| 4/26/2019 0:32  | 0.2583 | -0.35   | 2.4848 | 0.1833  | 0.5913 | 3.9    | 0.1578 | -0.7418 |
| 4/26/2019 0:33  | 0.2    | -0.325  | 2.4725 | -0.4667 | 0.5913 | 3.9417 | 0.1588 | -0.7418 |
| 4/26/2019 0:34  | 0.2    | -0.2583 | 2.4586 | -0.4    | 0.5913 | 4      | 0.1645 | -0.7418 |
| 4/26/2019 0:35  | 0.2    | -0.4417 | 2.5451 | -0.5    | 0.5913 | 4      | 0.1562 | -0.7418 |
| 4/26/2019 0:36  | 0.2    | -0.4417 | 2.2416 | -0.1    | 0.5913 | 4      | 0.1644 | -0.7418 |
| 4/26/2019 0:37  | 0.2    | -0.575  | 2.343  | -0.5667 | 0.5913 | 4      | 0.1682 | -0.7418 |
| 4/26/2019 0:38  | 0.2    | -0.6083 | 2.6833 | -0.0333 | 0.5913 | 3.9545 | 0.1552 | -0.7418 |
| 4/26/2019 0:39  | 0.2    | -0.0083 | 2.558  | -0.3667 | 0.5913 | 3.9    | 0.1767 | -0.7418 |
| 4/26/2019 0:40  | 0.175  | -0.075  | 2.5659 | -0.3333 | 0.5913 | 3.9    | 0.1538 | -0.7418 |
| 4/26/2019 0:41  | 0.1    | -1.125  | 2.5497 | -0.7667 | 0.5913 | 3.9    | 0.1671 | -0.7418 |
| 4/26/2019 0:42  | 0.1    | -0.325  | 2.4943 | 0.1167  | 0.5913 | 3.9    | 0.171  | -0.7418 |

|                |        |         |        |         |        |        |        |         |
|----------------|--------|---------|--------|---------|--------|--------|--------|---------|
| 4/26/2019 0:43 | 0.1    | -1.1917 | 2.4923 | -0.5833 | 0.5913 | 3.9    | 0.1572 | -0.7418 |
| 4/26/2019 0:44 | 0.1    | -0.5333 | 2.6763 | -0.1667 | 0.5913 | 3.9    | 0.1687 | -0.7418 |
| 4/26/2019 0:45 | 0.1    | -0.2167 | 2.7333 | -1      | 0.5913 | 3.9    | 0.1585 | -0.7418 |
| 4/26/2019 0:46 | 0.175  | -0.5667 | 2.6709 | -0.25   | 0.5913 | 3.9    | 0.1681 | -0.7418 |
| 4/26/2019 0:47 | 0.2167 | 0.2083  | 2.4965 | -0.4167 | 0.5913 | 3.9    | 0.1693 | -0.7418 |
| 4/26/2019 0:48 | 0.25   | -0.1917 | 2.8753 | -0.4    | 0.5913 | 3.95   | 0.1593 | -0.7418 |
| 4/26/2019 0:49 | 0.2167 | 0.3083  | 2.6967 | -0.1833 | 0.5913 | 4      | 0.17   | -0.7418 |
| 4/26/2019 0:50 | 0.225  | -0.8333 | 2.5874 | -0.2167 | 0.5913 | 4      | 0.1542 | -0.7418 |
| 4/26/2019 0:51 | 0.3    | -0.475  | 2.7993 | 0.0333  | 0.5913 | 4      | 0.162  | -0.7418 |
| 4/26/2019 0:52 | 0.3    | -0.3    | 2.4963 | -0.3333 | 0.5913 | 4      | 0.1643 | -0.7418 |
| 4/26/2019 0:53 | 0.3    | 0.4417  | 2.3842 | -0.2667 | 0.5913 | 4.09   | 0.1494 | -0.7418 |
| 4/26/2019 0:54 | 0.25   | -0.05   | 2.4931 | -0.0333 | 0.5913 | 4.2    | 0.1658 | -0.7418 |
| 4/26/2019 0:55 | 0.2    | 0.9583  | 2.5292 | -0.0667 | 0.5913 | 4.15   | 0.1616 | -0.7418 |
| 4/26/2019 0:56 | 0.2    | 0.2833  | 2.6439 | 0.3     | 0.5913 | 4.1    | 0.1568 | -0.7418 |
| 4/26/2019 0:57 | 0.2    | -0.15   | 2.5593 | -0.15   | 0.5913 | 4.1    | 0.1673 | -0.7418 |
| 4/26/2019 0:58 | 0.2    | -0.0917 | 2.6348 | -0.3667 | 0.5913 | 4.1    | 0.1502 | -0.7418 |
| 4/26/2019 0:59 | 0.2    | 0.1417  | 2.4229 | 0.3667  | 0.5913 | 4.2    | 0.1678 | -0.7418 |
| 4/26/2019 1:00 | 0.2    | -0.5333 | 2.8021 | 0.1667  | 0.5913 | 4.2    | 0.1575 | -0.7418 |
| 4/26/2019 1:01 | 0.2    | 0.2917  | 2.345  | -0.5833 | 0.5913 | 4.175  | 0.1607 | -0.7418 |
| 4/26/2019 1:02 | 0.2    | -0.6083 | 2.5238 | -0.1667 | 0.5913 | 4.2    | 0.1708 | -0.7418 |
| 4/26/2019 1:03 | 0.2    | 0.2083  | 2.5683 | -0.0667 | 0.5913 | 4.2    | 0.1545 | -0.7418 |
| 4/26/2019 1:04 | 0.2    | -0.2083 | 2.8148 | -0.2667 | 0.5913 | 4.2    | 0.1658 | -0.7418 |
| 4/26/2019 1:05 | 0.2667 | 0.075   | 2.2325 | -0.6833 | 0.5913 | 4.2667 | 0.167  | -0.7418 |
| 4/26/2019 1:06 | 0.3    | -0.45   | 2.4314 | -0.2833 | 0.5913 | 4.1    | 0.1559 | -0.7418 |
| 4/26/2019 1:07 | 0.3917 | -0.2083 | 2.2036 | -0.2    | 0.5913 | 4.1    | 0.1695 | -0.7418 |
| 4/26/2019 1:08 | 0.4    | 0       | 1.907  | 0.3333  | 0.5913 | 4.1909 | 0.1571 | -0.7418 |
| 4/26/2019 1:09 | 0.4    | 0.1083  | 2.5212 | 0.2833  | 0.5913 | 4.2    | 0.1632 | -0.7418 |
| 4/26/2019 1:10 | 0.4    | 0.1167  | 2.4917 | -0.4    | 0.5913 | 4.2    | 0.1638 | -0.7418 |
| 4/26/2019 1:11 | 0.45   | -0.45   | 2.3811 | -0.2833 | 0.5913 | 4.1333 | 0.1567 | -0.7418 |
| 4/26/2019 1:12 | 0.4917 | -0.8667 | 2.2828 | -0.2333 | 0.5913 | 4.1273 | 0.1648 | -0.7418 |
| 4/26/2019 1:13 | 0.5167 | -0.075  | 2.4667 | -0.9833 | 0.5913 | 4.1    | 0.1601 | -0.7418 |
| 4/26/2019 1:14 | 0.5167 | -0.5667 | 2.4107 | -0.05   | 0.5913 | 4.1    | 0.1618 | -0.7418 |
| 4/26/2019 1:15 | 0.5    | -0.8083 | 2.2021 | -0.2667 | 0.5913 | 4.1    | 0.1636 | -0.7418 |
| 4/26/2019 1:16 | 0.4833 | -0.5333 | 2.3434 | -0.4833 | 0.5913 | 4.1    | 0.1572 | -0.7418 |
| 4/26/2019 1:17 | 0.4    | 0.4917  | 2.605  | -0.0667 | 0.5913 | 4.1    | 0.1714 | -0.7418 |
| 4/26/2019 1:18 | 0.4    | -0.075  | 2.4199 | -0.3333 | 0.5913 | 4.0364 | 0.1611 | -0.7418 |
| 4/26/2019 1:19 | 0.4    | -0.225  | 2.5478 | -0.15   | 0.5913 | 4      | 0.16   | -0.7418 |
| 4/26/2019 1:20 | 0.4    | 0.1833  | 2.4301 | -0.0167 | 0.5913 | 4      | 0.1687 | -0.7418 |
| 4/26/2019 1:21 | 0.3    | -0.0667 | 2.1228 | -0.35   | 0.5913 | 4      | 0.153  | -0.7418 |
| 4/26/2019 1:22 | 0.3    | -0.0083 | 2.7185 | -0.0333 | 0.5913 | 4      | 0.1612 | -0.7418 |
| 4/26/2019 1:23 | 0.3    | -0.7667 | 2.5489 | -0.7333 | 0.5913 | 4      | 0.1639 | -0.7418 |
| 4/26/2019 1:24 | 0.2333 | -0.4083 | 2.5296 | -0.65   | 0.5913 | 4      | 0.1562 | -0.7418 |
| 4/26/2019 1:25 | 0.2    | 0.15    | 2.3807 | -0.1833 | 0.5913 | 4      | 0.1692 | -0.7418 |
| 4/26/2019 1:26 | 0.2    | -0.1167 | 2.2187 | -0.3    | 0.5913 | 4      | 0.1552 | -0.7418 |
| 4/26/2019 1:27 | 0.2333 | -0.5583 | 2.2913 | 0.1667  | 0.5913 | 4      | 0.1668 | -0.7418 |
| 4/26/2019 1:28 | 0.3    | 0       | 2.4176 | 0.4667  | 0.5913 | 4      | 0.1606 | -0.7418 |
| 4/26/2019 1:29 | 0.3    | -0.2833 | 2.2853 | -0.3333 | 0.5913 | 4      | 0.1537 | -0.7418 |

|                |        |         |        |         |        |        |        |         |
|----------------|--------|---------|--------|---------|--------|--------|--------|---------|
| 4/26/2019 1:30 | 0.3    | -0.2083 | 2.2124 | -0.2167 | 0.5913 | 4      | 0.1713 | -0.7418 |
| 4/26/2019 1:31 | 0.3083 | -0.3417 | 2.3664 | -0.15   | 0.5913 | 4.03   | 0.1566 | -0.7418 |
| 4/26/2019 1:32 | 0.3    | -0.2833 | 2.4665 | -0.7    | 0.5913 | 4.1    | 0.16   | -0.7418 |
| 4/26/2019 1:33 | 0.325  | -0.2833 | 2.0947 | 0.0667  | 0.5913 | 4.0455 | 0.1693 | -0.7418 |
| 4/26/2019 1:34 | 0.3667 | -0.05   | 2.3372 | -0.25   | 0.5913 | 4.0636 | 0.1555 | -0.7418 |
| 4/26/2019 1:35 | 0.3    | -0.575  | 2.4154 | -0.7833 | 0.5913 | 4.1    | 0.1698 | -0.7418 |
| 4/26/2019 1:36 | 0.3    | -0.1333 | 2.5004 | -0.85   | 0.5913 | 4.1    | 0.1588 | -0.7418 |
| 4/26/2019 1:37 | 0.2333 | 0.1667  | 2.2798 | -0.1833 | 0.5913 | 4.1    | 0.165  | -0.7418 |
| 4/26/2019 1:38 | 0.3    | 0.1833  | 2.2935 | 0.1167  | 0.5913 | 4.1    | 0.166  | -0.7418 |
| 4/26/2019 1:39 | 0.3    | -0.7083 | 2.3578 | -0.1333 | 0.5913 | 4.1    | 0.1572 | -0.7418 |
| 4/26/2019 1:40 | 0.3    | -0.4667 | 2.2228 | -0.4167 | 0.5913 | 4.1    | 0.1652 | -0.7418 |
| 4/26/2019 1:41 | 0.3    | 0.1     | 2.0524 | -0.45   | 0.5913 | 4.1    | 0.1645 | -0.7418 |
| 4/26/2019 1:42 | 0.2417 | -0.2417 | 2.3388 | -0.3667 | 0.5913 | 4.1    | 0.1534 | -0.7418 |
| 4/26/2019 1:43 | 0.2    | -0.175  | 2.8304 | -0.2    | 0.5913 | 4.1    | 0.1699 | -0.7418 |
| 4/26/2019 1:44 | 0.2583 | -0.125  | 2.8595 | -0.4167 | 0.5913 | 4.1    | 0.1529 | -0.7418 |
| 4/26/2019 1:45 | 0.2833 | 0.2167  | 2.2158 | 0.1333  | 0.5913 | 4.1    | 0.1685 | -0.7418 |
| 4/26/2019 1:46 | 0.2917 | 0.375   | 2.5378 | -0.1667 | 0.5913 | 4.1    | 0.163  | -0.7418 |
| 4/26/2019 1:47 | 0.2917 | -0.125  | 2.3626 | 0.1167  | 0.5913 | 4.1    | 0.1523 | -0.7418 |
| 4/26/2019 1:48 | 0.3    | -0.1417 | 2.408  | -0.1833 | 0.5913 | 4.1    | 0.1615 | -0.7418 |
| 4/26/2019 1:49 | 0.3083 | 0.0167  | 2.1443 | 0.1     | 0.5913 | 4.1    | 0.1556 | -0.7418 |
| 4/26/2019 1:50 | 0.35   | -0.3917 | 2.3658 | -0.0667 | 0.5913 | 4.1    | 0.1617 | -0.7418 |
| 4/26/2019 1:51 | 0.3    | -0.6417 | 2.2373 | -0.6167 | 0.5913 | 4.1    | 0.1613 | -0.7418 |
| 4/26/2019 1:52 | 0.3    | -0.5667 | 2.4637 | -0.2167 | 0.5913 | 4.08   | 0.1578 | -0.7418 |
| 4/26/2019 1:53 | 0.3    | -0.1417 | 2.5858 | -0.4333 | 0.5913 | 4.01   | 0.1663 | -0.7418 |
| 4/26/2019 1:54 | 0.3    | -0.0833 | 2.3057 | -0.5667 | 0.5913 | 4      | 0.1585 | -0.7418 |
| 4/26/2019 1:55 | 0.35   | -0.2917 | 2.4952 | -0.6833 | 0.5913 | 4      | 0.1552 | -0.7418 |
| 4/26/2019 1:56 | 0.3    | 0.0833  | 2.1798 | -0.2167 | 0.5913 | 4      | 0.1718 | -0.7418 |
| 4/26/2019 1:57 | 0.3    | -0.8667 | 2.1968 | -0.2    | 0.5913 | 4      | 0.1564 | -0.7418 |
| 4/26/2019 1:58 | 0.2917 | 0       | 2.1446 | -0.9667 | 0.5913 | 4      | 0.1642 | -0.7418 |
| 4/26/2019 1:59 | 0.2083 | -0.1833 | 2.5066 | -0.1667 | 0.5913 | 4      | 0.1642 | -0.7418 |
| 4/26/2019 2:00 | 0.2    | -0.1917 | 2.2678 | -0.65   | 0.5913 | 4      | 0.1609 | -0.7418 |
| 4/26/2019 2:01 | 0.1417 | -1.1917 | 2.3592 | -0.7167 | 0.5913 | 4.0818 | 0.1649 | -0.7418 |
| 4/26/2019 2:02 | 0.1    | -0.7667 | 2.695  | -0.9833 | 0.5913 | 4.1    | 0.1547 | -0.7418 |
| 4/26/2019 2:03 | 0.1    | 0.5333  | 1.9587 | -0.1667 | 0.5913 | 4.1    | 0.1604 | -0.7418 |
| 4/26/2019 2:04 | 0.125  | -0.2833 | 2.4823 | -0.4667 | 0.5913 | 4.1    | 0.1607 | -0.7418 |
| 4/26/2019 2:05 | 0.1917 | -0.6167 | 2.3418 | -0.2333 | 0.5913 | 4.1364 | 0.1493 | -0.7418 |
| 4/26/2019 2:06 | 0.2    | -0.35   | 2.522  | -0.0833 | 0.5913 | 4.2    | 0.1727 | -0.7418 |
| 4/26/2019 2:07 | 0.2    | -0.4333 | 2.6987 | -0.2333 | 0.5913 | 4.2    | 0.1607 | -0.7418 |
| 4/26/2019 2:08 | 0.2417 | -0.3333 | 2.043  | -0.8    | 0.5913 | 4.2    | 0.1675 | -0.7418 |
| 4/26/2019 2:09 | 0.3    | 0.2667  | 2.3427 | -0.4333 | 0.5913 | 4.2    | 0.1623 | -0.7418 |
| 4/26/2019 2:10 | 0.3    | -0.5583 | 2.1513 | 0.3167  | 0.5913 | 4.2    | 0.1558 | -0.7418 |
| 4/26/2019 2:11 | 0.3    | 0.775   | 2.0408 | -0.9333 | 0.5913 | 4.1727 | 0.1688 | -0.7418 |
| 4/26/2019 2:12 | 0.3167 | 0.125   | 2.0198 | 0.5167  | 0.5913 | 4.1    | 0.1608 | -0.7418 |
| 4/26/2019 2:13 | 0.3    | 0.3833  | 2.1613 | -0.25   | 0.5913 | 4.1    | 0.1585 | -0.7418 |
| 4/26/2019 2:14 | 0.3417 | -0.5667 | 1.9693 | 0.3833  | 0.5913 | 4.075  | 0.1722 | -0.7418 |
| 4/26/2019 2:15 | 0.4    | -0.2167 | 2.3048 | -0.6833 | 0.5913 | 4      | 0.1562 | -0.7418 |
| 4/26/2019 2:16 | 0.4    | -0.2    | 2.1237 | -0.3    | 0.5913 | 4.0417 | 0.1672 | -0.7418 |

|                |        |         |        |         |        |         |        |         |
|----------------|--------|---------|--------|---------|--------|---------|--------|---------|
| 4/26/2019 2:17 | 0.4    | 0.1333  | 2.3058 | -0.2333 | 0.5913 | 4       | 0.1638 | -0.7418 |
| 4/26/2019 2:18 | 0.4    | 0.1083  | 2.0398 | -0.3833 | 0.5913 | 4       | 0.1508 | -0.7418 |
| 4/26/2019 2:19 | 0.4    | -0.25   | 1.99   | -0.3167 | 0.5913 | 3.9636  | 0.1724 | -0.7418 |
| 4/26/2019 2:20 | 0.4    | -0.9083 | 1.9525 | 0.3     | 0.5913 | 3.9417  | 0.1558 | -0.7418 |
| 4/26/2019 2:21 | 0.3333 | 0.45    | 2.2538 | 0.1     | 0.5913 | 4       | 0.1625 | -0.7418 |
| 4/26/2019 2:22 | 0.2917 | -0.5    | 2.2775 | -0.45   | 0.5913 | 3.925   | 0.1652 | -0.7418 |
| 4/26/2019 2:23 | 0.2    | -0.5917 | 1.5695 | -0.2333 | 0.5913 | 3.9636  | 0.1526 | -0.7418 |
| 4/26/2019 2:24 | 0.2    | -0.7083 | 2.182  | -0.9833 | 0.5913 | 4       | 0.1647 | -0.7418 |
| 4/26/2019 2:25 | 0.1083 | -0.05   | 2.2283 | -0.45   | 0.5913 | 4       | 0.1566 | -0.7418 |
| 4/26/2019 2:26 | 0.1083 | -1.375  | 2.3927 | -0.4667 | 0.5913 | 4       | 0.1673 | -0.7418 |
| 4/26/2019 2:27 | 0.2    | -0.0917 | 2.2965 | -0.25   | 0.5913 | 4       | 0.1672 | -0.7418 |
| 4/26/2019 2:28 | 0.2    | -0.6    | 2.3012 | 0.2333  | 0.5913 | 4       | 0.1513 | -0.7418 |
| 4/26/2019 2:29 | 0.2    | -0.8    | 2.4057 | 0.05    | 0.5913 | 4       | 0.1653 | -0.7418 |
| 4/26/2019 2:30 | 0.2    | -0.975  | 2.3073 | -0.5167 | 0.5913 | 4       | 0.161  | -0.7418 |
| 4/26/2019 2:31 | 0.1917 | -0.4667 | 2.1532 | -0.65   | 0.5913 | 4       | 0.1593 | -0.7418 |
| 4/26/2019 2:32 | 0.1333 | -0.3    | 2.3485 | -0.8    | 0.5913 | 4.0167  | 0.1726 | -0.7418 |
| 4/26/2019 2:33 | 0.1    | -0.3083 | 1.8637 | -0.7667 | 0.5913 | 4.2583  | 0.158  | -0.7418 |
| 4/26/2019 2:34 | 0.1    | -0.6167 | 2.067  | 0.0333  | 0.5913 | 5.4273  | 0.1657 | -0.7418 |
| 4/26/2019 2:35 | 0.1    | -0.3417 | 2.3972 | 0.2     | 0.5913 | 6.6     | 0.1524 | -0.7418 |
| 4/26/2019 2:36 | 0.1    | -0.05   | 1.9673 | -0.0333 | 0.5913 | 7.3833  | 0.1604 | -0.7418 |
| 4/26/2019 2:37 | 0.1    | -0.1833 | 1.938  | -0.1333 | 0.5913 | 7.4     | 0.1618 | -0.7418 |
| 4/26/2019 2:38 | 0.1833 | -0.3333 | 2.2762 | 0.1833  | 0.5913 | 7.4     | 0.1554 | -0.7418 |
| 4/26/2019 2:39 | 0.2    | -0.3833 | 2.094  | 0.4167  | 0.5913 | 7.4     | 0.1681 | -0.7418 |
| 4/26/2019 2:40 | 0.1    | 0.0083  | 2.5067 | 0.5167  | 0.5913 | 7.3182  | 0.1545 | -0.7418 |
| 4/26/2019 2:41 | 0.1    | -0.6417 | 2.0825 | 0.4833  | 0.5913 | 7.4083  | 0.1603 | -0.7418 |
| 4/26/2019 2:42 | 0.1    | -0.7167 | 1.9472 | -0.1    | 0.5913 | 7.6     | 0.1657 | -0.7418 |
| 4/26/2019 2:43 | 0.1    | -0.25   | 2.0197 | -0.4833 | 0.5913 | 7.6917  | 0.154  | -0.7418 |
| 4/26/2019 2:44 | 0.1    | 0.2833  | 1.9198 | -0.2    | 0.5913 | 7.65    | 0.1657 | -0.7418 |
| 4/26/2019 2:45 | 0.1    | -0.6833 | 2.2918 | 0.0167  | 0.5913 | 8.5273  | 0.1515 | -0.7418 |
| 4/26/2019 2:46 | 0.1    | -0.3833 | 2.4828 | -0.1667 | 0.5913 | 8.6727  | 0.1621 | -0.7418 |
| 4/26/2019 2:47 | 0      | 0.1     | 2.0965 | -0.0667 | 0.5913 | 8.3455  | 0.1666 | -0.7418 |
| 4/26/2019 2:48 | 0.025  | -0.7583 | 1.9682 | -0.1167 | 0.5913 | 8.4167  | 0.1551 | -0.7418 |
| 4/26/2019 2:49 | 0.1    | 0.7333  | 2.0273 | 0       | 0.5913 | 9.7364  | 0.1634 | -0.7418 |
| 4/26/2019 2:50 | 0.1    | -0.2417 | 2.2713 | -0.5167 | 0.5913 | 11.0083 | 0.1556 | -0.7418 |
| 4/26/2019 2:51 | 0.1    | -0.1333 | 2.1835 | -0.95   | 0.5913 | 11.9364 | 0.1624 | -0.7418 |
| 4/26/2019 2:52 | 0.1    | -0.0583 | 2.0363 | -0.5167 | 0.5913 | 12.1333 | 0.1682 | -0.7418 |
| 4/26/2019 2:53 | 0.1    | -0.3167 | 2.0897 | -0.2333 | 0.5913 | 12.1417 | 0.1515 | -0.7418 |
| 4/26/2019 2:54 | 0.1083 | -0.1    | 1.959  | 0.1667  | 0.5913 | 11.925  | 0.1641 | -0.7418 |
| 4/26/2019 2:55 | 0.1333 | 0.3417  | 2.5088 | -0.5667 | 0.5913 | 11.8091 | 0.1598 | -0.7418 |
| 4/26/2019 2:56 | 0.1083 | -0.125  | 2.2538 | 0.0333  | 0.5913 | 11.9    | 0.1565 | -0.7418 |
| 4/26/2019 2:57 | 0.1417 | -0.325  | 2.404  | -0.3833 | 0.5913 | 11.2636 | 0.1686 | -0.7418 |
| 4/26/2019 2:58 | 0.1333 | -0.575  | 2.1968 | -0.0833 | 0.5913 | 10.0364 | 0.1432 | -0.7418 |
| 4/26/2019 2:59 | 0.1    | 0.45    | 2.1603 | -0.4167 | 0.5913 | 9.1417  | 0.1615 | -0.7418 |
| 4/26/2019 3:00 | 0.075  | 0.05    | 2.4505 | 0.2167  | 0.5913 | 8.1636  | 0.1583 | -0.7418 |
| 4/26/2019 3:01 | 0      | 0.025   | 2.1125 | -0.3    | 0.5913 | 6.8     | 0.1623 | -0.7418 |
| 4/26/2019 3:02 | -0.025 | -0.5167 | 2.1767 | -0.2833 | 0.5913 | 5.5273  | 0.1662 | -0.7418 |
| 4/26/2019 3:03 | -0.075 | -0.7333 | 2.293  | 0.2833  | 0.5913 | 4.4167  | 0.1498 | -0.7418 |

|                |        |         |        |         |        |        |        |         |
|----------------|--------|---------|--------|---------|--------|--------|--------|---------|
| 4/26/2019 3:04 | -0.1   | 0.2     | 2.1978 | -0.75   | 0.5913 | 4.1091 | 0.1659 | -0.7418 |
| 4/26/2019 3:05 | 0      | 0.3583  | 2.109  | -0.1    | 0.5913 | 4.2727 | 0.1548 | -0.7418 |
| 4/26/2019 3:06 | 0.0333 | 0.15    | 1.875  | -0.0833 | 0.5913 | 4.5727 | 0.1588 | -0.7418 |
| 4/26/2019 3:07 | 0.1    | -0.1    | 2.4222 | -0.1667 | 0.5913 | 4.9636 | 0.1629 | -0.7418 |
| 4/26/2019 3:08 | 0.1667 | -0.1167 | 2.2767 | -0.7833 | 0.5913 | 5.9091 | 0.1534 | -0.7418 |
| 4/26/2019 3:09 | 0.25   | -0.325  | 2.257  | 0.05    | 0.5913 | 7.125  | 0.1645 | -0.7418 |
| 4/26/2019 3:10 | 0.3    | -0.225  | 2.2258 | -0.1167 | 0.5913 | 8.0636 | 0.1642 | -0.7418 |
| 4/26/2019 3:11 | 0.3    | 0.1583  | 2.0508 | 0.05    | 0.5913 | 8.1    | 0.1557 | -0.7418 |
| 4/26/2019 3:12 | 0.3    | -0.1333 | 2.1622 | -0.15   | 0.5913 | 8.1    | 0.166  | -0.7418 |
| 4/26/2019 3:13 | 0.3    | 0.8     | 2.0965 | -0.4667 | 0.5913 | 8.0455 | 0.1522 | -0.7418 |
| 4/26/2019 3:14 | 0.3667 | -0.0083 | 2.3147 | -0.2    | 0.5913 | 8      | 0.1613 | -0.7418 |
| 4/26/2019 3:15 | 0.4    | 0.1833  | 2.1342 | -0.65   | 0.5913 | 8      | 0.162  | -0.7418 |
| 4/26/2019 3:16 | 0.4    | -0.4    | 2.0175 | -0.55   | 0.5913 | 8      | 0.1546 | -0.7418 |
| 4/26/2019 3:17 | 0.4    | -0.4917 | 1.8693 | -0.8333 | 0.5913 | 7.875  | 0.1648 | -0.7418 |
| 4/26/2019 3:18 | 0.4167 | -0.275  | 2.0305 | 0.1667  | 0.5913 | 7.65   | 0.1494 | -0.7418 |
| 4/26/2019 3:19 | 0.4667 | 0.225   | 2.3023 | -0.3667 | 0.5913 | 7.1583 | 0.1595 | -0.7418 |
| 4/26/2019 3:20 | 0.45   | -0.3417 | 2.1938 | -0.2    | 0.5913 | 6.58   | 0.1641 | -0.7418 |
| 4/26/2019 3:21 | 0.4    | 0.1667  | 2.3218 | -0.5667 | 0.5913 | 5.3667 | 0.1516 | -0.7418 |
| 4/26/2019 3:22 | 0.325  | -0.1917 | 2.233  | -0.7167 | 0.5913 | 4.2727 | 0.17   | -0.7418 |
| 4/26/2019 3:23 | 0.3    | -0.7083 | 2.1053 | 0.4833  | 0.5913 | 4.1    | 0.158  | -0.7418 |
| 4/26/2019 3:24 | 0.3    | 0.35    | 2.2557 | -0.0833 | 0.5913 | 4.1083 | 0.1583 | -0.7418 |
| 4/26/2019 3:25 | 0.3667 | -0.1833 | 1.7275 | -0.3333 | 0.5913 | 4.3636 | 0.1648 | -0.7418 |
| 4/26/2019 3:26 | 0.4    | -0.05   | 2.0255 | -0.3333 | 0.5913 | 4.6909 | 0.1498 | -0.7418 |
| 4/26/2019 3:27 | 0.4    | 0       | 2.3775 | 0.4667  | 0.5913 | 4.7    | 0.16   | -0.7418 |
| 4/26/2019 3:28 | 0.4    | -0.5667 | 2.1188 | 0.05    | 0.5913 | 4.7    | 0.1593 | -0.7418 |
| 4/26/2019 3:29 | 0.35   | -0.3833 | 2.0993 | 0.35    | 0.5913 | 4.7    | 0.1576 | -0.7418 |
| 4/26/2019 3:30 | 0.3    | -0.2167 | 2.2522 | -0.2167 | 0.5913 | 4.7    | 0.1628 | -0.7418 |
| 4/26/2019 3:31 | 0.3167 | -0.15   | 2.152  | -0.2167 | 0.5913 | 4.7    | 0.1481 | -0.7418 |
| 4/26/2019 3:32 | 0.4    | 0.075   | 2.014  | 0.9167  | 0.5913 | 4.7    | 0.1619 | -0.7418 |
| 4/26/2019 3:33 | 0.4    | -0.8    | 2.3569 | 0.25    | 0.5913 | 4.6364 | 0.1555 | -0.7418 |
| 4/26/2019 3:34 | 0.3333 | -0.7083 | 2.0926 | -0.1167 | 0.5913 | 4.6    | 0.1551 | -0.7418 |
| 4/26/2019 3:35 | 0.3167 | 0.0917  | 2.2383 | 0.0333  | 0.5913 | 4.6    | 0.1662 | -0.7418 |
| 4/26/2019 3:36 | 0.3    | 0.3667  | 1.8339 | -0.1667 | 0.5913 | 4.5333 | 0.1513 | -0.7418 |
| 4/26/2019 3:37 | 0.2417 | 0.4333  | 1.9227 | -0.35   | 0.5913 | 4.4273 | 0.1626 | -0.7418 |
| 4/26/2019 3:38 | 0.2    | -0.9    | 2.3363 | 0.1667  | 0.5913 | 4.04   | 0.1595 | -0.7418 |
| 4/26/2019 3:39 | 0.15   | -0.0417 | 2.0922 | -0.2833 | 0.5913 | 4      | 0.1511 | -0.7418 |
| 4/26/2019 3:40 | 0.1667 | 0.4583  | 2.2367 | 0.05    | 0.5913 | 4      | 0.1704 | -0.7418 |
| 4/26/2019 3:41 | 0.1917 | 0.0583  | 1.9814 | -0.1833 | 0.5913 | 4      | 0.1502 | -0.7418 |
| 4/26/2019 3:42 | 0.175  | -0.0667 | 2.0543 | -0.2667 | 0.5913 | 4      | 0.1605 | -0.7418 |
| 4/26/2019 3:43 | 0.2    | -0.5917 | 2.1113 | 0.35    | 0.5913 | 4      | 0.1585 | -0.7418 |
| 4/26/2019 3:44 | 0.25   | -0.2917 | 1.7393 | 0.15    | 0.5913 | 4.0273 | 0.1461 | -0.7418 |
| 4/26/2019 3:45 | 0.3    | -0.0167 | 2.3714 | -0.3667 | 0.5913 | 4.0636 | 0.1665 | -0.7418 |
| 4/26/2019 3:46 | 0.3    | -0.5167 | 2.257  | -0.4    | 0.5913 | 4.1    | 0.1535 | -0.7418 |
| 4/26/2019 3:47 | 0.3    | 0.1333  | 2.062  | 0.3     | 0.5913 | 4.2455 | 0.1618 | -0.7418 |
| 4/26/2019 3:48 | 0.3    | 0.35    | 1.8569 | -0.4333 | 0.5913 | 4.4    | 0.1614 | -0.7418 |
| 4/26/2019 3:49 | 0.3417 | -0.3667 | 2.0369 | -0.15   | 0.5913 | 4.4833 | 0.1472 | -0.7418 |
| 4/26/2019 3:50 | 0.3    | -0.375  | 1.9558 | 0.2167  | 0.5913 | 4.6727 | 0.1639 | -0.7418 |



|                |        |         |        |         |        |        |        |         |
|----------------|--------|---------|--------|---------|--------|--------|--------|---------|
| 4/26/2019 3:51 | 0.3417 | 0.0333  | 1.9358 | 0.3667  | 0.5913 | 4.8083 | 0.151  | -0.7418 |
| 4/26/2019 3:52 | 0.3    | 0.15    | 2.0362 | 0.1333  | 0.5913 | 4.8333 | 0.1569 | -0.7418 |
| 4/26/2019 3:53 | 0.3167 | -0.3833 | 1.7503 | 0.15    | 0.5913 | 4.8    | 0.1593 | -0.7418 |
| 4/26/2019 3:54 | 0.3    | -1.025  | 1.9912 | -0.4167 | 0.5913 | 4.8    | 0.1402 | -0.7418 |
| 4/26/2019 3:55 | 0.2    | -0.3083 | 2.6064 | 0.4833  | 0.5913 | 4.8417 | 0.1642 | -0.7418 |
| 4/26/2019 3:56 | 0.2    | -0.275  | 2.2013 | -0.0667 | 0.5913 | 4.9    | 0.1562 | -0.7418 |
| 4/26/2019 3:57 | 0.2    | -0.175  | 2.2142 | -0.1    | 0.5913 | 4.9    | 0.1594 | -0.7418 |
| 4/26/2019 3:58 | 0.2    | -0.6167 | 2.0724 | 0.1833  | 0.5913 | 4.8182 | 0.1631 | -0.7418 |
| 4/26/2019 3:59 | 0.2    | -0.2167 | 2.1459 | -0.0667 | 0.5913 | 4.7273 | 0.1497 | -0.7418 |
| 4/26/2019 4:00 | 0.2    | -0.8917 | 2.2832 | 0.0167  | 0.5913 | 4.6083 | 0.1677 | -0.7418 |
| 4/26/2019 4:01 | 0.2    | -0.3167 | 1.5487 | -0.3167 | 0.5913 | 4.6182 | 0.1616 | -0.7418 |
| 4/26/2019 4:02 | 0.225  | -0.025  | 2.0214 | -0.2833 | 0.5913 | 4.3818 | 0.1558 | -0.7418 |
| 4/26/2019 4:03 | 0.35   | -0.4833 | 2.1532 | -0.0333 | 0.5913 | 4.2182 | 0.1714 | -0.7418 |
| 4/26/2019 4:04 | 0.4167 | -0.4833 | 2.0366 | -0.6833 | 0.5913 | 4.1    | 0.1467 | -0.7418 |
| 4/26/2019 4:05 | 0.4917 | -0.0083 | 2.2153 | -0.3833 | 0.5913 | 4.1    | 0.1635 | -0.7418 |
| 4/26/2019 4:06 | 0.4    | -0.3833 | 1.7909 | -0.4333 | 0.5913 | 4.1909 | 0.1604 | -0.7418 |
| 4/26/2019 4:07 | 0.4    | -0.4083 | 2.0543 | -0.5833 | 0.5913 | 4.1273 | 0.1526 | -0.7418 |
| 4/26/2019 4:08 | 0.425  | -0.4167 | 1.7853 | -0.1667 | 0.5913 | 4.1    | 0.1643 | -0.7418 |
| 4/26/2019 4:09 | 0.45   | 0.4833  | 1.8491 | 0       | 0.5913 | 4.0333 | 0.1522 | -0.7418 |
| 4/26/2019 4:10 | 0.4333 | 0.5     | 1.9917 | -0.1167 | 0.5913 | 4      | 0.1596 | -0.7418 |
| 4/26/2019 4:11 | 0.4167 | -0.3167 | 2.0579 | 0.0167  | 0.5913 | 4      | 0.1567 | -0.7418 |
| 4/26/2019 4:12 | 0.4    | 0.1833  | 1.8451 | 0.3333  | 0.5913 | 4      | 0.1554 | -0.7418 |
| 4/26/2019 4:13 | 0.375  | -0.1333 | 2.0958 | -0.3667 | 0.5913 | 4      | 0.1655 | -0.7418 |
| 4/26/2019 4:14 | 0.3167 | -0.0917 | 2.3974 | -0.35   | 0.5913 | 4      | 0.152  | -0.7418 |
| 4/26/2019 4:15 | 0.35   | -0.3583 | 2.544  | 0.1667  | 0.5913 | 4.0273 | 0.16   | -0.7418 |
| 4/26/2019 4:16 | 0.3    | -0.25   | 2.1584 | -0.35   | 0.5913 | 4.1917 | 0.1548 | -0.7418 |
| 4/26/2019 4:17 | 0.3    | -0.3167 | 2.1965 | -0.2833 | 0.5913 | 4.2    | 0.1546 | -0.7418 |
| 4/26/2019 4:18 | 0.3    | -0.6667 | 2.2979 | 0.0167  | 0.5913 | 4.2    | 0.1657 | -0.7418 |
| 4/26/2019 4:19 | 0.3    | 0.1667  | 2.4044 | -0.4667 | 0.5913 | 4.2    | 0.1458 | -0.7418 |
| 4/26/2019 4:20 | 0.3    | 0.0333  | 1.7114 | -0.5667 | 0.5913 | 4.5091 | 0.1618 | -0.7418 |
| 4/26/2019 4:21 | 0.3    | -0.475  | 2.0479 | -0.8833 | 0.5913 | 5.1    | 0.1556 | -0.7418 |
| 4/26/2019 4:22 | 0.3167 | 0.0083  | 1.9983 | -0.1    | 0.5913 | 5.4545 | 0.1588 | -0.7418 |
| 4/26/2019 4:23 | 0.3917 | -0.3167 | 1.8438 | 0.3     | 0.5913 | 6.4    | 0.1612 | -0.7418 |
| 4/26/2019 4:24 | 0.35   | -0.425  | 1.8326 | -0.1167 | 0.5913 | 6.5    | 0.1524 | -0.7418 |
| 4/26/2019 4:25 | 0.3    | 0.0167  | 1.984  | -0.3167 | 0.5913 | 6.5917 | 0.161  | -0.7418 |
| 4/26/2019 4:26 | 0.3    | 0.0583  | 1.9023 | -0.0667 | 0.5913 | 6.5545 | 0.1614 | -0.7418 |
| 4/26/2019 4:27 | 0.3    | 0.1583  | 1.5673 | -0.2333 | 0.5913 | 6.5    | 0.1497 | -0.7418 |
| 4/26/2019 4:28 | 0.3    | 0.025   | 1.9082 | -0.6333 | 0.5913 | 6.4    | 0.1666 | -0.7418 |
| 4/26/2019 4:29 | 0.2667 | 0.3417  | 1.8771 | -0.5333 | 0.5913 | 6.3    | 0.1537 | -0.7418 |
| 4/26/2019 4:30 | 0.3    | -0.1333 | 1.7435 | -0.8667 | 0.5913 | 6.3    | 0.1596 | -0.7418 |
| 4/26/2019 4:31 | 0.3    | -0.6333 | 1.8129 | 0.0667  | 0.5913 | 6.3    | 0.1556 | -0.7418 |
| 4/26/2019 4:32 | 0.2833 | 0.0917  | 2.0069 | -0.4333 | 0.5913 | 6.18   | 0.1567 | -0.7418 |
| 4/26/2019 4:33 | 0.2    | -0.625  | 2.1728 | -0.75   | 0.5913 | 5.45   | 0.1634 | -0.7418 |
| 4/26/2019 4:34 | 0.1833 | -0.05   | 1.9395 | -0.5333 | 0.5913 | 5.2636 | 0.1511 | -0.7418 |
| 4/26/2019 4:35 | 0.15   | 0.1917  | 2.1128 | -0.4167 | 0.5913 | 4.3091 | 0.1617 | -0.7418 |
| 4/26/2019 4:36 | 0.2    | -0.15   | 2.0305 | -0.3167 | 0.5913 | 4      | 0.1619 | -0.7418 |
| 4/26/2019 4:37 | 0.225  | -0.0917 | 2.1262 | 0.25    | 0.5913 | 4      | 0.1493 | -0.7418 |

|                |         |         |        |         |        |        |        |         |
|----------------|---------|---------|--------|---------|--------|--------|--------|---------|
| 4/26/2019 4:38 | 0.275   | -0.4417 | 2.0353 | 0.25    | 0.5913 | 4      | 0.1687 | -0.7418 |
| 4/26/2019 4:39 | 0.3     | -0.4917 | 2.0994 | -0.4667 | 0.5913 | 4      | 0.1484 | -0.7418 |
| 4/26/2019 4:40 | 0.3     | 0.625   | 2.134  | -0.7667 | 0.5913 | 4      | 0.155  | -0.7418 |
| 4/26/2019 4:41 | 0.3     | -0.2167 | 2.1972 | -0.1333 | 0.5913 | 4      | 0.155  | -0.7418 |
| 4/26/2019 4:42 | 0.2333  | -0.5083 | 2.0623 | -0.2333 | 0.5913 | 4      | 0.1521 | -0.7418 |
| 4/26/2019 4:43 | 0.225   | -1.0667 | 1.9942 | -0.6667 | 0.5913 | 4      | 0.1649 | -0.7418 |
| 4/26/2019 4:44 | 0.275   | 0.15    | 1.7749 | -0.35   | 0.5913 | 4      | 0.1553 | -0.7418 |
| 4/26/2019 4:45 | 0.3     | 0.4     | 1.8307 | -0.5833 | 0.5913 | 4      | 0.1576 | -0.7418 |
| 4/26/2019 4:46 | 0.3     | -0.3917 | 1.7553 | -0.55   | 0.5913 | 3.9545 | 0.1642 | -0.7418 |
| 4/26/2019 4:47 | 0.3     | -0.0333 | 1.734  | -0.1667 | 0.5913 | 4      | 0.1477 | -0.7418 |
| 4/26/2019 4:48 | 0.3     | -0.225  | 2.0757 | 0.25    | 0.5913 | 4      | 0.1714 | -0.7418 |
| 4/26/2019 4:49 | 0.3     | -0.55   | 2.0053 | -0.3167 | 0.5913 | 4      | 0.159  | -0.7418 |
| 4/26/2019 4:50 | 0.3     | 0.0583  | 2.0113 | -0.05   | 0.5913 | 4      | 0.1576 | -0.7418 |
| 4/26/2019 4:51 | 0.2917  | 0.3417  | 1.5757 | 0.2333  | 0.5913 | 4      | 0.1649 | -0.7418 |
| 4/26/2019 4:52 | 0.2     | -0.05   | 1.4652 | -0.2667 | 0.5913 | 4      | 0.142  | -0.7418 |
| 4/26/2019 4:53 | 0.1917  | 0.2     | 1.7243 | 0.25    | 0.5913 | 4      | 0.1619 | -0.7418 |
| 4/26/2019 4:54 | 0.1167  | -0.4667 | 1.5897 | -0.3    | 0.5913 | 4      | 0.1626 | -0.7418 |
| 4/26/2019 4:55 | 0.1     | -0.6917 | 1.778  | -0.15   | 0.5913 | 4      | 0.1549 | -0.7418 |
| 4/26/2019 4:56 | 0.125   | -0.375  | 1.6093 | -0.0833 | 0.5913 | 4      | 0.1709 | -0.7418 |
| 4/26/2019 4:57 | 0.1     | -0.5333 | 1.6059 | -0.1    | 0.5913 | 4      | 0.1504 | -0.7418 |
| 4/26/2019 4:58 | 0.1083  | -0.1083 | 1.9138 | -0.5167 | 0.5913 | 4      | 0.1611 | -0.7418 |
| 4/26/2019 4:59 | 0.15    | -0.3417 | 2.2462 | -0.05   | 0.5913 | 4      | 0.1595 | -0.7418 |
| 4/26/2019 5:00 | 0.15    | -0.9083 | 2.3527 | -0.4333 | 0.5913 | 4      | 0.1508 | -0.7418 |
| 4/26/2019 5:01 | 0.1     | -0.375  | 1.689  | -0.3833 | 0.5913 | 4.0667 | 0.1636 | -0.7418 |
| 4/26/2019 5:02 | 0.1     | -0.025  | 1.9193 | -0.65   | 0.5913 | 4.1    | 0.1532 | -0.7418 |
| 4/26/2019 5:03 | 0.1     | 0.0083  | 1.9592 | -0.3833 | 0.5913 | 4.1    | 0.1604 | -0.7418 |
| 4/26/2019 5:04 | 0.1     | -0.3167 | 2.0053 | 0.3333  | 0.5913 | 4.1    | 0.1634 | -0.7418 |
| 4/26/2019 5:05 | 0.1     | -0.4167 | 1.9977 | -0.3167 | 0.5913 | 4.1    | 0.141  | -0.7418 |
| 4/26/2019 5:06 | 0.15    | -0.6917 | 1.6963 | 0.1     | 0.5913 | 4.1    | 0.1645 | -0.7418 |
| 4/26/2019 5:07 | 0.175   | -0.0083 | 1.9213 | 0       | 0.5913 | 4.1    | 0.1532 | -0.7418 |
| 4/26/2019 5:08 | 0.1     | -0.425  | 1.408  | -0.0667 | 0.5913 | 4.1    | 0.1496 | -0.7418 |
| 4/26/2019 5:09 | 0.1     | -0.4917 | 1.935  | -0.3667 | 0.5913 | 4.1182 | 0.1621 | -0.7418 |
| 4/26/2019 5:10 | 0.1083  | 0.175   | 1.7547 | -0.8333 | 0.5913 | 4.1    | 0.1491 | -0.7418 |
| 4/26/2019 5:11 | 0.1083  | -0.375  | 2.0663 | 0.5167  | 0.5913 | 4.1    | 0.1484 | -0.7418 |
| 4/26/2019 5:12 | 0.1     | 0.1417  | 1.9002 | 0.0167  | 0.5913 | 4.1    | 0.1551 | -0.7418 |
| 4/26/2019 5:13 | 0.0833  | -0.225  | 1.791  | -0.1833 | 0.5913 | 4.1    | 0.1382 | -0.7418 |
| 4/26/2019 5:14 | 0.0167  | -0.025  | 1.769  | -0.0667 | 0.5913 | 4.1    | 0.1473 | -0.7418 |
| 4/26/2019 5:15 | 0       | -0.2    | 1.7187 | -0.3    | 0.5913 | 4.1    | 0.1404 | -0.7418 |
| 4/26/2019 5:16 | 0       | -1.1333 | 1.9958 | 0.35    | 0.5913 | 4.1    | 0.1387 | -0.7418 |
| 4/26/2019 5:17 | 0       | -0.2583 | 2.0745 | -0.2833 | 0.5913 | 4.1364 | 0.1551 | -0.7418 |
| 4/26/2019 5:18 | 0       | -0.5667 | 2.1037 | -0.4833 | 0.5913 | 4.4727 | 0.1337 | -0.7418 |
| 4/26/2019 5:19 | -0.0167 | -0.2917 | 1.9318 | 0.05    | 0.5913 | 4.7    | 0.1454 | -0.7418 |
| 4/26/2019 5:20 | -0.0917 | -0.4583 | 1.7442 | 0.5     | 0.5913 | 4.71   | 0.1488 | -0.7418 |
| 4/26/2019 5:21 | -0.1    | -0.8917 | 2.1463 | -0.4833 | 0.5913 | 4.8091 | 0.1352 | -0.7418 |
| 4/26/2019 5:22 | -0.0167 | -0.2667 | 2.0758 | -0.2667 | 0.5913 | 5.3083 | 0.1466 | -0.7418 |
| 4/26/2019 5:23 | 0       | -0.2667 | 1.9132 | -0.55   | 0.5913 | 5.575  | 0.1407 | -0.7418 |
| 4/26/2019 5:24 | 0.025   | 0.0333  | 2.1922 | -0.15   | 0.5913 | 5.6    | 0.1371 | -0.7418 |

|                |        |         |        |         |        |        |        |         |
|----------------|--------|---------|--------|---------|--------|--------|--------|---------|
| 4/26/2019 5:25 | 0.0833 | 0.3     | 1.5805 | -0.8    | 0.5913 | 5.6    | 0.1507 | -0.7418 |
| 4/26/2019 5:26 | 0.1    | 0.5833  | 1.8563 | -0.0167 | 0.5913 | 5.5273 | 0.1434 | -0.7418 |
| 4/26/2019 5:27 | 0.1    | -0.1583 | 1.9527 | 0.4667  | 0.5913 | 5.5    | 0.1389 | -0.7418 |
| 4/26/2019 5:28 | 0.1    | -0.6333 | 1.9832 | -0.7333 | 0.5913 | 5.5    | 0.1455 | -0.7418 |
| 4/26/2019 5:29 | 0.1    | 0.3417  | 1.8403 | -0.05   | 0.5913 | 5.5    | 0.1288 | -0.7418 |
| 4/26/2019 5:30 | 0.1    | -1.1833 | 2.0355 | -0.0833 | 0.5913 | 5.2182 | 0.1466 | -0.7418 |
| 4/26/2019 5:31 | 0.1    | -0.8083 | 1.9138 | -0.3333 | 0.5913 | 4.9545 | 0.1384 | -0.7418 |
| 4/26/2019 5:32 | 0.15   | -0.7833 | 2.2418 | -0.1167 | 0.5913 | 5.5083 | 0.1335 | -0.7418 |
| 4/26/2019 5:33 | 0.1917 | -0.6417 | 2.2002 | -0.35   | 0.5913 | 5.5182 | 0.1487 | -0.7418 |
| 4/26/2019 5:34 | 0.1667 | -0.325  | 2.2398 | 0.2     | 0.5913 | 5.1636 | 0.1379 | -0.7418 |
| 4/26/2019 5:35 | 0.1    | -0.3333 | 1.6927 | -0.7    | 0.5913 | 5.1636 | 0.1396 | -0.7418 |
| 4/26/2019 5:36 | 0.1    | -0.425  | 2.1405 | -0.8167 | 0.5913 | 5.2    | 0.1448 | -0.7418 |
| 4/26/2019 5:37 | 0.1333 | -0.9333 | 2.1182 | -0.2667 | 0.5913 | 5.2636 | 0.1387 | -0.7418 |
| 4/26/2019 5:38 | 0.225  | -0.3917 | 2.1412 | -0.85   | 0.5913 | 5.6636 | 0.1499 | -0.7418 |
| 4/26/2019 5:39 | 0.3    | -0.2    | 2.274  | -0.05   | 0.5913 | 5.7    | 0.1456 | -0.7418 |
| 4/26/2019 5:40 | 0.2917 | -0.9667 | 1.7538 | -0.8    | 0.5913 | 5.7    | 0.1407 | -0.7418 |
| 4/26/2019 5:41 | 0.25   | -0.2667 | 1.5677 | -0.4833 | 0.5913 | 5.7    | 0.1465 | -0.7418 |
| 4/26/2019 5:42 | 0.3    | 0.0667  | 1.9105 | 0.05    | 0.5913 | 5.7    | 0.1349 | -0.7418 |
| 4/26/2019 5:43 | 0.35   | 0.0417  | 2.0753 | 0.2833  | 0.5913 | 5.7    | 0.1498 | -0.7418 |
| 4/26/2019 5:44 | 0.4    | -0.4833 | 1.6412 | -0.05   | 0.5913 | 5.2091 | 0.1421 | -0.7418 |
| 4/26/2019 5:45 | 0.4    | -0.2    | 1.6844 | -0.3667 | 0.5913 | 5      | 0.136  | -0.7418 |
| 4/26/2019 5:46 | 0.4    | -0.4417 | 2.2947 | -0.4833 | 0.5913 | 5      | 0.1521 | -0.7418 |
| 4/26/2019 5:47 | 0.4    | -0.975  | 1.6905 | -0.1667 | 0.5913 | 4.78   | 0.1447 | -0.7418 |
| 4/26/2019 5:48 | 0.4    | -0.4333 | 1.5758 | -0.2833 | 0.5913 | 5.2455 | 0.1416 | -0.7418 |
| 4/26/2019 5:49 | 0.4    | 0.1333  | 1.5758 | -0.3833 | 0.5913 | 5.9833 | 0.1548 | -0.7418 |
| 4/26/2019 5:50 | 0.4    | 0.4917  | 1.7345 | -0.4833 | 0.5913 | 6.12   | 0.1364 | -0.7418 |
| 4/26/2019 5:51 | 0.35   | -0.7417 | 1.8713 | 0.3667  | 0.5913 | 6.4833 | 0.1579 | -0.7418 |
| 4/26/2019 5:52 | 0.2917 | -0.675  | 1.8455 | -0.3667 | 0.5913 | 6.8    | 0.1456 | -0.7418 |
| 4/26/2019 5:53 | 0.2    | -0.3583 | 2.0057 | -0.6333 | 0.5913 | 6.8    | 0.1437 | -0.7418 |
| 4/26/2019 5:54 | 0.175  | 0.3833  | 2.155  | -0.2    | 0.5913 | 6.8444 | 0.1639 | -0.7418 |
| 4/26/2019 5:55 | 0.175  | -0.725  | 1.9473 | -1      | 0.5913 | 6.9    | 0.1459 | -0.7418 |
| 4/26/2019 5:56 | 0.15   | 0.2667  | 1.9437 | -0.6167 | 0.5913 | 6.9    | 0.156  | -0.7418 |
| 4/26/2019 5:57 | 0.1083 | -0.0917 | 2.0502 | -0.1833 | 0.5913 | 6.9    | 0.1559 | -0.7418 |
| 4/26/2019 5:58 | 0.1917 | 0.3167  | 1.7087 | -0.1333 | 0.5913 | 6.9    | 0.1514 | -0.7418 |
| 4/26/2019 5:59 | 0.2917 | -0.3167 | 1.9862 | -0.1667 | 0.5913 | 6.98   | 0.1668 | -0.7418 |
| 4/26/2019 6:00 | 0.3667 | 0.0833  | 1.6673 | -0.2167 | 0.5913 | 6.5    | 0.1551 | -0.7418 |
| 4/26/2019 6:01 | 0.4    | 0.625   | 2.1105 | -0.1667 | 0.5913 | 5.7182 | 0.1573 | -0.7418 |
| 4/26/2019 6:02 | 0.4    | 0.0083  | 2.0892 | -0.05   | 0.5913 | 5.2167 | 0.169  | -0.7418 |
| 4/26/2019 6:03 | 0.3333 | -0.0917 | 1.6947 | -0.4167 | 0.5913 | 4.73   | 0.1573 | -0.7418 |
| 4/26/2019 6:04 | 0.3    | -0.05   | 1.9898 | -0.6333 | 0.5913 | 4.3    | 0.165  | -0.7418 |
| 4/26/2019 6:05 | 0.3    | -0.05   | 1.6267 | -0.3833 | 0.5913 | 4.3    | 0.1658 | -0.7418 |
| 4/26/2019 6:06 | 0.3    | -0.7583 | 2.157  | -0.5833 | 0.5913 | 4.3    | 0.1569 | -0.7418 |
| 4/26/2019 6:07 | 0.3    | -0.4333 | 1.7008 | -0.15   | 0.5913 | 4.3    | 0.1725 | -0.7418 |
| 4/26/2019 6:08 | 0.3    | -0.6833 | 2.133  | 0.1667  | 0.5913 | 4.3    | 0.1597 | -0.7418 |
| 4/26/2019 6:09 | 0.3    | 0.7917  | 1.4575 | -0.2833 | 0.5913 | 4.3    | 0.1705 | -0.7418 |
| 4/26/2019 6:10 | 0.3    | 0.35    | 1.8918 | -0.6333 | 0.5913 | 4.3    | 0.1751 | -0.7418 |
| 4/26/2019 6:11 | 0.3    | -0.5417 | 1.8418 | -0.5833 | 0.5913 | 4.3    | 0.1604 | -0.7418 |

|                |        |         |         |         |        |        |        |         |
|----------------|--------|---------|---------|---------|--------|--------|--------|---------|
| 4/26/2019 6:12 | 0.3    | 0.0167  | 2.1397  | -0.6667 | 0.5913 | 4.3    | 0.1776 | -0.7418 |
| 4/26/2019 6:13 | 0.25   | -0.6    | 2.0928  | -0.1833 | 0.5913 | 4.4333 | 0.1631 | -0.7418 |
| 4/26/2019 6:14 | 0.2    | -0.6417 | 1.856   | -0.4833 | 0.5913 | 4.8    | 0.1633 | -0.7418 |
| 4/26/2019 6:15 | 0.2    | 0.6     | 1.8488  | -0.1333 | 0.5913 | 4.8091 | 0.1742 | -0.7418 |
| 4/26/2019 6:16 | 0.2    | 0.3333  | 1.7622  | -0.0667 | 0.5913 | 4.9    | 0.1659 | -0.7418 |
| 4/26/2019 6:17 | 0.2    | -0.7333 | 1.7933  | -0.5167 | 0.5913 | 4.9    | 0.1715 | -0.7418 |
| 4/26/2019 6:18 | 0.175  | -0.4167 | 1.9982  | -0.1    | 0.5913 | 4.9    | 0.1727 | -0.7418 |
| 4/26/2019 6:19 | 0.2    | -0.5917 | 2.0957  | -0.45   | 0.5913 | 4.9    | 0.1632 | -0.7418 |
| 4/26/2019 6:20 | 0.2833 | -0.1833 | 1.7507  | -0.2    | 0.5913 | 4.9167 | 0.1736 | -0.7418 |
| 4/26/2019 6:21 | 0.3    | 0.05    | 1.8833  | -0.4333 | 0.5913 | 4.9182 | 0.1689 | -0.7418 |
| 4/26/2019 6:22 | 0.2917 | 0.0333  | 1.9597  | 0.45    | 0.5913 | 4.9    | 0.1657 | -0.7418 |
| 4/26/2019 6:23 | 0.2333 | 0.15    | 1.8695  | -0.3667 | 0.5913 | 4.9    | 0.1663 | -0.7418 |
| 4/26/2019 6:24 | 0.2083 | -0.2583 | 1.8562  | -0.55   | 0.5913 | 4.9    | 0.1606 | -0.7418 |
| 4/26/2019 6:25 | 0.275  | -0.0167 | 2.1988  | -0.3333 | 0.5913 | 4.8833 | 0.1676 | -0.7418 |
| 4/26/2019 6:26 | 0.2    | -0.6    | -0.4604 | -0.7333 | 0.5913 | 4.4273 | 0.1737 | -0.7418 |
| 4/26/2019 6:27 | 0.2083 | 0.2     | 1.4756  | -0.3333 | 0.5913 | 4.4    | 0.1619 | -0.7418 |
| 4/26/2019 6:28 | 0.2833 | 0.075   | 1.2124  | -0.1333 | 0.5913 | 4.3455 | 0.169  | -0.7418 |
| 4/26/2019 6:29 | 0.3    | -0.0083 | 1.8783  | 0.1667  | 0.5913 | 4.325  | 0.1568 | -0.7418 |
| 4/26/2019 6:30 | 0.2583 | -0.6583 | 2.0222  | -0.05   | 0.5913 | 4.3091 | 0.1627 | -0.7418 |
| 4/26/2019 6:31 | 0.1833 | -0.0333 | 2       | -0.2167 | 0.5913 | 4.4    | 0.1673 | -0.7418 |
| 4/26/2019 6:32 | 0.1    | -0.1917 | 1.9627  | -0.1167 | 0.5913 | 4.4    | 0.1546 | -0.7418 |
| 4/26/2019 6:33 | 0.1167 | -0.05   | 1.684   | -0.4167 | 0.5913 | 4.4    | 0.1654 | -0.7418 |
| 4/26/2019 6:34 | 0.2    | -0.4667 | 1.9632  | -0.7167 | 0.5913 | 4.4667 | 0.1582 | -0.7418 |
| 4/26/2019 6:35 | 0.2    | 0.5083  | 1.9998  | -0.7667 | 0.5913 | 4.5727 | 0.1644 | -0.7418 |
| 4/26/2019 6:36 | 0.2    | -0.4333 | 1.8521  | -0.4167 | 0.5913 | 4.9091 | 0.1654 | -0.7418 |
| 4/26/2019 6:37 | 0.2    | 0.125   | 1.7436  | -0.35   | 0.5913 | 5.0167 | 0.1617 | -0.7418 |
| 4/26/2019 6:38 | 0.15   | 0.225   | 1.4967  | -0.0833 | 0.5913 | 5.2417 | 0.1682 | -0.7418 |
| 4/26/2019 6:39 | 0.1    | 0.1833  | 2.0282  | -0.0667 | 0.5913 | 5.4    | 0.1699 | -0.7418 |
| 4/26/2019 6:40 | 0.1    | 0.025   | 1.5862  | -0.45   | 0.5913 | 5.8545 | 0.1541 | -0.7418 |
| 4/26/2019 6:41 | 0.1    | -0.025  | 1.7926  | -0.4167 | 0.5913 | 6.85   | 0.1707 | -0.7418 |
| 4/26/2019 6:42 | 0.15   | 0.3333  | 1.6738  | -0.7667 | 0.5913 | 7.625  | 0.1623 | -0.7418 |
| 4/26/2019 6:43 | 0.1667 | -0.2333 | 1.4922  | -0.45   | 0.5913 | 7.7    | 0.1621 | -0.7418 |
| 4/26/2019 6:44 | 0.1    | 0.1417  | 1.607   | -0.9167 | 0.5913 | 7.7    | 0.1649 | -0.7418 |
| 4/26/2019 6:45 | 0      | -0.325  | 1.8967  | -0.4833 | 0.5913 | 7.7    | 0.1522 | -0.7418 |
| 4/26/2019 6:46 | 0      | -0.45   | 2.0818  | -0.35   | 0.5913 | 7.7182 | 0.1628 | -0.7418 |
| 4/26/2019 6:47 | 0.0167 | -0.2333 | 1.6193  | -0.5    | 0.5913 | 8.0167 | 0.1639 | -0.7418 |
| 4/26/2019 6:48 | 0.1    | -0.6167 | 1.5392  | -0.45   | 0.5913 | 7.9667 | 0.16   | -0.7418 |
| 4/26/2019 6:49 | 0.1    | -0.3917 | 1.6407  | -0.7167 | 0.5913 | 8.0833 | 0.171  | -0.7418 |
| 4/26/2019 6:50 | 0.1    | 0.1917  | 1.4919  | -0.55   | 0.5913 | 8.3182 | 0.1593 | -0.7418 |
| 4/26/2019 6:51 | 0.0167 | 0.475   | 1.6465  | -0.3667 | 0.5913 | 8.175  | 0.1701 | -0.7418 |
| 4/26/2019 6:52 | 0      | -0.775  | 1.8494  | -0.6167 | 0.5913 | 8.0417 | 0.1743 | -0.7418 |
| 4/26/2019 6:53 | 0      | -0.025  | 1.8175  | -0.4333 | 0.5913 | 7.3833 | 0.1592 | -0.7418 |
| 4/26/2019 6:54 | 0.0417 | 0.0333  | 1.4491  | -0.65   | 0.5913 | 6.6    | 0.1701 | -0.7418 |
| 4/26/2019 6:55 | 0.0583 | -0.2    | 1.3009  | -0.3667 | 0.5913 | 6.4    | 0.1675 | -0.7418 |
| 4/26/2019 6:56 | 0.0583 | -0.0167 | 1.6789  | -0.4333 | 0.5913 | 6.4    | 0.1639 | -0.7418 |
| 4/26/2019 6:57 | 0.075  | -0.5083 | 1.7915  | -0.6    | 0.5913 | 6.3417 | 0.1714 | -0.7418 |
| 4/26/2019 6:58 | 0.1    | -0.8    | 1.8941  | -0.5667 | 0.5913 | 6.4727 | 0.1611 | -0.7418 |

|                |         |         |          |         |        |          |        |         |
|----------------|---------|---------|----------|---------|--------|----------|--------|---------|
| 4/26/2019 6:59 | 0.1     | -0.0583 | 1.9028   | -0.75   | 0.5913 | 6.5455   | 0.1671 | -0.7418 |
| 4/26/2019 7:00 | 0.0667  | 0.1667  | 1.8059   | -0.3167 | 0.5913 | 6.4818   | 0.1868 | -0.7418 |
| 4/26/2019 7:01 | 0       | 2.1     | 15.2043  | 3.7667  | 0.5913 | 26.375   | 0.3812 | -0.7418 |
| 4/26/2019 7:02 | 0       | 3.6833  | 92.2992  | 20.7667 | 0.5913 | 64.58    | 1.4575 | -0.7418 |
| 4/26/2019 7:03 | 0       | 2.1583  | 104.7533 | 20.7833 | 0.5913 | 78.4091  | 1.7705 | -0.7418 |
| 4/26/2019 7:04 | 0       | 2.2917  | 91.4108  | 18.7833 | 0.5913 | 83.18    | 1.7798 | -0.7418 |
| 4/26/2019 7:05 | -0.0333 | 2.6333  | 102.0808 | 22.35   | 0.5913 | 86.2583  | 2.1675 | -0.7418 |
| 4/26/2019 7:06 | -0.0917 | 2.8333  | 101.9417 | 22.5333 | 0.5913 | 88.18    | 2.294  | -0.7418 |
| 4/26/2019 7:07 | -0.05   | 3.8583  | 103.19   | 24.6167 | 0.5913 | 85.6583  | 2.3857 | -0.7418 |
| 4/26/2019 7:08 | -0.0333 | 3.9667  | 105.4333 | 25.65   | 0.5913 | 98.5636  | 2.5552 | -0.7418 |
| 4/26/2019 7:09 | 0       | 2.8     | 102.7833 | 24.1833 | 0.5913 | 111.9273 | 2.5735 | -0.7418 |
| 4/26/2019 7:10 | 0       | 3.5417  | 101.575  | 24      | 0.5913 | 100.7    | 2.6035 | -0.7418 |
| 4/26/2019 7:11 | 0       | 3.7083  | 99.2325  | 23.7833 | 0.5913 | 108.025  | 2.6305 | -0.7418 |
| 4/26/2019 7:12 | 0       | 3.6083  | 95.9642  | 23.8833 | 0.5913 | 113.4    | 2.5893 | -0.7418 |
| 4/26/2019 7:13 | 0.075   | 3.6     | 93.5567  | 23.5    | 0.5913 | 107.2    | 2.6607 | -0.7418 |
| 4/26/2019 7:14 | 0.1     | 3.9583  | 92.0383  | 23.2833 | 0.5913 | 108.3091 | 2.681  | -0.7418 |
| 4/26/2019 7:15 | 0.0833  | 3.075   | 89.4325  | 23.6667 | 0.5913 | 108.1091 | 2.6867 | -0.7418 |
| 4/26/2019 7:16 | 0       | 3.7333  | 86.44    | 22.5667 | 0.5913 | 97.72    | 2.6777 | -0.7418 |
| 4/26/2019 7:17 | 0       | 3.2917  | 84.27    | 22.5    | 0.5913 | 96.0455  | 2.7005 | -0.7418 |
| 4/26/2019 7:18 | 0       | 3.2917  | 82.6058  | 22.35   | 0.5913 | 94.9083  | 2.7742 | -0.7418 |
| 4/26/2019 7:19 | 0       | 2.8083  | 80.5325  | 21.7    | 0.5913 | 93.9273  | 2.7868 | -0.7418 |
| 4/26/2019 7:20 | 0       | 3.2     | 78.445   | 21.65   | 0.5913 | 93.5182  | 2.83   | -0.7418 |
| 4/26/2019 7:21 | 0       | 2.975   | 75.7792  | 21.4667 | 0.5913 | 93.7     | 2.8215 | -0.7418 |
| 4/26/2019 7:22 | 0.05    | 2.1     | 76.2633  | 21.6    | 0.5913 | 94.2583  | 2.8382 | -0.7418 |
| 4/26/2019 7:23 | 0.1     | 2.525   | 74.0292  | 21.4333 | 0.5913 | 94.4909  | 2.8633 | -0.7418 |
| 4/26/2019 7:24 | 0.1     | 2.8583  | 72.5008  | 20.6833 | 0.5913 | 94.65    | 2.859  | -0.7418 |
| 4/26/2019 7:25 | 0.1     | 2.05    | 70.1492  | 20.9333 | 0.5913 | 94.8727  | 2.8118 | -0.7418 |
| 4/26/2019 7:26 | 0.1     | 3.1167  | 69.095   | 20.5167 | 0.5913 | 95.8273  | 2.821  | -0.7418 |
| 4/26/2019 7:27 | 0.1     | 3.075   | 67.2825  | 20.05   | 0.5913 | 95.7546  | 2.8232 | -0.7418 |
| 4/26/2019 7:28 | 0.1     | 3.1083  | 66.02    | 19.8667 | 0.5913 | 95.47    | 2.8047 | -0.7418 |
| 4/26/2019 7:29 | 0.1     | 2.575   | 64.9075  | 19.5167 | 0.5913 | 94.7182  | 2.8103 | -0.7418 |
| 4/26/2019 7:30 | 0.1     | 2.85    | 63.59    | 19.8667 | 0.5913 | 94.1273  | 2.8033 | -0.7418 |
| 4/26/2019 7:31 | 0.0667  | 2.2833  | 61.8133  | 18.9333 | 0.5913 | 93.3636  | 2.7978 | -0.7418 |
| 4/26/2019 7:32 | 0       | 2.5333  | 61.1233  | 19.6667 | 0.5913 | 92.8546  | 2.7917 | -0.7418 |
| 4/26/2019 7:33 | 0       | 2.425   | 60.2933  | 18.9667 | 0.5913 | 92.4083  | 2.769  | -0.7418 |
| 4/26/2019 7:34 | 0       | 3.6417  | 59.9617  | 19.4333 | 0.5913 | 91.1727  | 2.7765 | -0.7418 |
| 4/26/2019 7:35 | 0       | 3.55    | 57.9417  | 18.7833 | 0.5913 | 90.2182  | 2.7647 | -0.7418 |
| 4/26/2019 7:36 | 0       | 2.7583  | 57.3633  | 18.75   | 0.5913 | 89.1556  | 2.755  | -0.7418 |
| 4/26/2019 7:37 | 0.0273  | 2.3333  | 56.1908  | 17.8167 | 0.5913 | 87.9818  | 2.7627 | -0.7418 |
| 4/26/2019 7:38 | 0       | 1.9083  | 55.3217  | 18.2333 | 0.5913 | 86.02    | 2.726  | -0.7418 |
| 4/26/2019 7:39 | 0       | 2.9167  | 53.94    | 17.8667 | 0.5913 | 84.5909  | 2.7173 | -0.7418 |
| 4/26/2019 7:40 | -0.025  | 2.0667  | 52.955   | 18.25   | 0.5913 | 83.68    | 2.705  | -0.7418 |
| 4/26/2019 7:41 | 0       | 2.7583  | 52.1808  | 17.85   | 0.5913 | 83.12    | 2.6898 | -0.7418 |
| 4/26/2019 7:42 | 0.0083  | 3.025   | 51.8258  | 17.35   | 0.5913 | 82.4667  | 2.6957 | -0.7418 |
| 4/26/2019 7:43 | 0       | 2.7     | 51.4258  | 17.35   | 0.5913 | 81.7455  | 2.6878 | -0.7418 |
| 4/26/2019 7:44 | 0       | 2.5417  | 49.7375  | 16.75   | 0.5913 | 80.98    | 2.6667 | -0.7418 |
| 4/26/2019 7:45 | 0       | 2.5917  | 49.2775  | 16.6167 | 0.5913 | 80.0273  | 2.6518 | -0.7418 |

|                |         |        |         |         |        |         |        |         |
|----------------|---------|--------|---------|---------|--------|---------|--------|---------|
| 4/26/2019 7:46 | 0       | 2.7917 | 47.6833 | 16.3833 | 0.5913 | 78.6636 | 2.6178 | -0.7418 |
| 4/26/2019 7:47 | -0.0083 | 2.4333 | 47.4733 | 16.3333 | 0.5913 | 77.9364 | 2.6272 | -0.7418 |
| 4/26/2019 7:48 | -0.0083 | 2.725  | 46.84   | 16.55   | 0.5913 | 77.23   | 2.6192 | -0.7418 |
| 4/26/2019 7:49 | -0.0917 | 2.325  | 46.1933 | 16.1833 | 0.5913 | 76.6273 | 2.6048 | -0.7418 |
| 4/26/2019 7:50 | -0.0917 | 1.9    | 45.2375 | 16.0333 | 0.5913 | 76.0545 | 2.5938 | -0.7418 |
| 4/26/2019 7:51 | -0.0167 | 2.45   | 44.6392 | 14.95   | 0.5913 | 75.4    | 2.5653 | -0.7418 |
| 4/26/2019 7:52 | 0       | 2.5917 | 43.4933 | 15.65   | 0.5913 | 74.8    | 2.5538 | -0.7418 |
| 4/26/2019 7:53 | 0.0333  | 2.1583 | 43.33   | 15.6    | 0.5913 | 74.2333 | 2.5542 | -0.7418 |
| 4/26/2019 7:54 | 0       | 2.4333 | 43.0067 | 14.8833 | 0.5913 | 73.6445 | 2.5313 | -0.7418 |
| 4/26/2019 7:55 | 0       | 1.35   | 42.3808 | 14.9333 | 0.5913 | 73.1909 | 2.5257 | -0.7418 |
| 4/26/2019 7:56 | 0.0167  | 2.0167 | 41.7425 | 15.0833 | 0.5913 | 73.2727 | 2.5117 | -0.7418 |
| 4/26/2019 7:57 | 0.1     | 2.5917 | 41.0075 | 14.5167 | 0.5913 | 72.825  | 2.4865 | -0.7418 |
| 4/26/2019 7:58 | 0.1     | 2.1083 | 40.025  | 14.4833 | 0.5913 | 72.375  | 2.4773 | -0.7418 |
| 4/26/2019 7:59 | 0.1     | 1.5583 | 39.87   | 14.2333 | 0.5913 | 71.9636 | 2.4723 | -0.7418 |
| 4/26/2019 8:00 | 0.1     | 2.1917 | 38.9233 | 14.2667 | 0.5913 | 71.6667 | 2.4465 | -0.7418 |
| 4/26/2019 8:01 | 0.075   | 2.1583 | 38.89   | 13.9    | 0.5913 | 71.3364 | 2.4473 | -0.7418 |
| 4/26/2019 8:02 | 0.025   | 1.9417 | 38.35   | 14.0833 | 0.5913 | 70.8818 | 2.4272 | -0.7418 |
| 4/26/2019 8:03 | 0.0333  | 2.0667 | 37.425  | 13.8167 | 0.5913 | 70.4583 | 2.4055 | -0.7418 |
| 4/26/2019 8:04 | 0.0833  | 2.075  | 37.3867 | 13.6833 | 0.5913 | 70.3546 | 2.4108 | -0.7418 |
| 4/26/2019 8:05 | 0.1     | 1.275  | 37.0033 | 13.6833 | 0.5913 | 70.0636 | 2.3897 | -0.7418 |
| 4/26/2019 8:06 | 0.1083  | 1.9583 | 36.275  | 13.2333 | 0.5913 | 69.6917 | 2.3817 | -0.7418 |
| 4/26/2019 8:07 | 0.1545  | 1.6167 | 35.935  | 13.3667 | 0.5913 | 69.3167 | 2.3667 | -0.7418 |
| 4/26/2019 8:08 | 0.1     | 2.0833 | 35.87   | 13      | 0.5913 | 68.4455 | 2.3513 | -0.7418 |
| 4/26/2019 8:09 | 0.075   | 1.5    | 35.2983 | 13.0333 | 0.5913 | 68      | 2.3502 | -0.7418 |
| 4/26/2019 8:10 | 0       | 1.5083 | 34.7367 | 13.6667 | 0.5913 | 67.8091 | 2.3215 | -0.7418 |
| 4/26/2019 8:11 | 0       | 1.25   | 34.3067 | 12.5    | 0.5913 | 67.6091 | 2.3083 | -0.7418 |
| 4/26/2019 8:12 | 0       | 1.925  | 33.3067 | 12.0833 | 0.5913 | 67.1167 | 2.2995 | -0.7418 |
| 4/26/2019 8:13 | 0       | 1.875  | 33.085  | 12.6167 | 0.5913 | 66.9222 | 2.2668 | -0.7418 |
| 4/26/2019 8:14 | 0       | 2.0917 | 32.8483 | 11.9333 | 0.5913 | 66.65   | 2.2583 | -0.7418 |
| 4/26/2019 8:15 | 0       | 1.5    | 32.3067 | 11.9833 | 0.5913 | 66.3    | 2.2527 | -0.7418 |
| 4/26/2019 8:16 | 0       | 1.7917 | 32.1517 | 11.9667 | 0.5913 | 65.8667 | 2.2392 | -0.7418 |
| 4/26/2019 8:17 | -0.0583 | 1.275  | 32.1533 | 11.6333 | 0.5913 | 65.6556 | 2.2385 | -0.7418 |
| 4/26/2019 8:18 | -0.1    | 1.05   | 30.465  | 11.15   | 0.5913 | 65.2667 | 2.186  | -0.7418 |
| 4/26/2019 8:19 | -0.0833 | 1.7167 | 30.83   | 11.2667 | 0.5913 | 64.975  | 2.2088 | -0.7418 |
| 4/26/2019 8:20 | -0.0583 | 1.575  | 30.7167 | 11.0833 | 0.5913 | 64.9083 | 2.1945 | -0.7418 |
| 4/26/2019 8:21 | 0       | 1.3917 | 29.42   | 10.9833 | 0.5913 | 65.2417 | 2.1575 | -0.7418 |
| 4/26/2019 8:22 | 0.0333  | 1.65   | 20.16   | 7.9333  | 0.5913 | 63.9273 | 1.691  | -0.7418 |
| 4/26/2019 8:23 | 0.1083  | 1.05   | 20.865  | 8.35    | 0.5913 | 62.0727 | 1.7513 | -0.7418 |
| 4/26/2019 8:24 | 0.5417  | 3.1833 | 6.8768  | 4.9833  | 0.5913 | 31.6273 | 0.9525 | -0.7418 |
| 4/26/2019 8:25 | 1.1083  | 3.0417 | 4.96    | 4.85    | 0.5913 | 14.5    | 0.6916 | -0.7418 |
| 4/26/2019 8:26 | 1.8083  | 3.825  | 3.0382  | 4.55    | 0.5913 | 9.1417  | 0.5061 | -0.7418 |
| 4/26/2019 8:27 | 2.2583  | 4.4333 | 3.1527  | 5.5     | 0.5913 | 7.2667  | 0.447  | -0.7418 |
| 4/26/2019 8:28 | 2.6583  | 4.1917 | 3.0937  | 4.9833  | 0.5913 | 5.975   | 0.4212 | -0.7418 |
| 4/26/2019 8:29 | 3.0417  | 5.6833 | 3.6032  | 5.3667  | 0.5913 | 4.84    | 0.3601 | -0.7418 |
| 4/26/2019 8:30 | 3.2917  | 4.4917 | 4.8875  | 5.4667  | 0.5913 | 6.4     | 0.4536 | -0.7418 |
| 4/26/2019 8:31 | 3.125   | 4.2583 | 7.6057  | 5.45    | 0.5913 | 11.0091 | 0.6555 | -0.7418 |
| 4/26/2019 8:32 | 2.7917  | 3.9667 | 7.7095  | 5.15    | 0.5913 | 10.55   | 0.656  | -0.7418 |

|                |        |        |        |        |        |         |        |         |
|----------------|--------|--------|--------|--------|--------|---------|--------|---------|
| 4/26/2019 8:33 | 2.45   | 3.3083 | 7.0943 | 5.6167 | 0.5913 | 19.1    | 0.6693 | -0.7418 |
| 4/26/2019 8:34 | 2.4917 | 3.2167 | 6.0598 | 5.4833 | 0.5913 | 15.9167 | 0.574  | -0.7418 |
| 4/26/2019 8:35 | 2.4417 | 3.7083 | 6.4857 | 4.6833 | 0.5913 | 14.01   | 0.577  | -0.7418 |
| 4/26/2019 8:36 | 2.4667 | 3.7833 | 5.728  | 4.9167 | 0.5913 | 10.8667 | 0.5558 | -0.7418 |
| 4/26/2019 8:37 | 2.4    | 4.625  | 5.1547 | 4.5667 | 0.5913 | 10.3182 | 0.5047 | -0.7418 |
| 4/26/2019 8:38 | 2.4    | 4.4583 | 5.0327 | 4.5667 | 0.5913 | 10.0667 | 0.478  | -0.7418 |
| 4/26/2019 8:39 | 2.4417 | 3.9667 | 4.3392 | 4.5667 | 0.5913 | 9.7083  | 0.4432 | -0.7418 |
| 4/26/2019 8:40 | 2.7917 | 5.275  | 4.0248 | 5.6833 | 0.5913 | 9.2167  | 0.3233 | -0.7418 |
| 4/26/2019 8:41 | 3.3167 | 5.3167 | 3.8263 | 5.8833 | 0.5913 | 8.7364  | 0.2874 | -0.7418 |
| 4/26/2019 8:42 | 3.8167 | 5.2333 | 3.9543 | 5.1667 | 0.5913 | 8.15    | 0.2707 | -0.7418 |
| 4/26/2019 8:43 | 4.0583 | 5.1417 | 3.7385 | 5.0833 | 0.5913 | 7.53    | 0.2355 | -0.7418 |
| 4/26/2019 8:44 | 4.2333 | 6.425  | 4.0343 | 5.5167 | 0.5913 | 6.9833  | 0.2556 | -0.7418 |
| 4/26/2019 8:45 | 4.375  | 5.65   | 4.3377 | 5.9    | 0.5913 | 6.4333  | 0.242  | -0.7418 |
| 4/26/2019 8:46 | 4.4833 | 5.85   | 4.6312 | 5.8    | 0.5913 | 6.1545  | 0.2297 | -0.7418 |
| 4/26/2019 8:47 | 4.5667 | 6.5833 | 4.5973 | 6.8667 | 0.5913 | 5.55    | 0.2492 | -0.7418 |
| 4/26/2019 8:48 | 4.8167 | 6.5167 | 5.054  | 6.4667 | 0.5913 | 5.025   | 0.2148 | -0.7418 |
| 4/26/2019 8:49 | 5.1417 | 6.8833 | 5.568  | 7.5167 | 0.5913 | 4.3636  | 0.2178 | -0.7418 |
| 4/26/2019 8:50 | 5.4583 | 7.9917 | 5.544  | 7.3833 | 0.5913 | 3.93    | 0.2178 | -0.7418 |
| 4/26/2019 8:51 | 5.7    | 8.15   | 5.4632 | 7.65   | 0.5913 | 3.6222  | 0.2053 | -0.7418 |
| 4/26/2019 8:52 | 5.9417 | 8.0083 | 5.989  | 7.8333 | 0.5913 | 3.4364  | 0.2056 | -0.7418 |
| 4/26/2019 8:53 | 6.1417 | 8.5583 | 5.974  | 8      | 0.5913 | 3.4     | 0.2064 | -0.7418 |
| 4/26/2019 8:54 | 6.3833 | 8.55   | 6.3778 | 9.15   | 0.5913 | 3.3583  | 0.1893 | -0.7418 |
| 4/26/2019 8:55 | 6.5333 | 7.8583 | 6.6932 | 8.2333 | 0.5913 | 3.3545  | 0.1949 | -0.7418 |
| 4/26/2019 8:56 | 6.525  | 8      | 6.4725 | 8.0167 | 0.5913 | 3.2333  | 0.1976 | -0.7418 |
| 4/26/2019 8:57 | 6.175  | 6.8    | 5.8197 | 7.35   | 0.5913 | 3.11    | 0.2058 | -0.7418 |
| 4/26/2019 8:58 | 5.2667 | 5.05   | 5.0052 | 5.3833 | 0.5913 | 2.7364  | 0.2735 | -0.7418 |
| 4/26/2019 8:59 | 4.35   | 4.025  | 4.6885 | 4.8833 | 0.5913 | 2.6545  | 0.275  | -0.7418 |
| 4/26/2019 9:00 | 3.6    | 4.1917 | 4.6657 | 4.6667 | 0.5913 | 2.9455  | 0.288  | -0.7418 |
| 4/26/2019 9:01 | 3.3083 | 4.1833 | 4.5912 | 4.7333 | 0.5913 | 3.26    | 0.2913 | -0.7418 |
| 4/26/2019 9:02 | 3.1583 | 3.725  | 4.6438 | 4.1667 | 0.5913 | 3.3167  | 0.2914 | -0.7418 |
| 4/26/2019 9:03 | 3.0667 | 4.1417 | 4.5762 | 4.5167 | 0.5913 | 3.55    | 0.2988 | -0.7418 |
| 4/26/2019 9:04 | 3      | 3.5083 | 4.7503 | 3.9667 | 0.5913 | 3.6     | 0.3037 | -0.7418 |
| 4/26/2019 9:05 | 2.8917 | 3.6    | 4.1938 | 3.85   | 0.5913 | 3.6     | 0.2894 | -0.7418 |
| 4/26/2019 9:06 | 2.7917 | 3.9333 | 4.5328 | 3.85   | 0.5913 | 3.9083  | 0.3097 | -0.7418 |
| 4/26/2019 9:07 | 2.7    | 2.9833 | 4.1248 | 3.4667 | 0.5913 | 4.25    | 0.2942 | -0.7418 |
| 4/26/2019 9:08 | 2.675  | 3.4333 | 4.5498 | 3.2333 | 0.5913 | 4.8     | 0.303  | -0.7418 |
| 4/26/2019 9:09 | 2.525  | 3.5833 | 4.3553 | 4.0167 | 0.5913 | 5.05    | 0.3092 | -0.7418 |
| 4/26/2019 9:10 | 2.4    | 2.8083 | 3.8427 | 3.3333 | 0.5913 | 5.3833  | 0.301  | -0.7418 |
| 4/26/2019 9:11 | 2.4    | 2.7333 | 4.2498 | 2.7667 | 0.5913 | 5.3917  | 0.3109 | -0.7418 |
| 4/26/2019 9:12 | 2.3417 | 2.825  | 4.3577 | 3.1167 | 0.5913 | 5.0833  | 0.3106 | -0.7418 |
| 4/26/2019 9:13 | 2.2333 | 2.5917 | 3.9397 | 3.55   | 0.5913 | 4.7417  | 0.2933 | -0.7418 |
| 4/26/2019 9:14 | 2.1333 | 2.6917 | 3.7983 | 3.05   | 0.5913 | 4.7636  | 0.3151 | -0.7418 |
| 4/26/2019 9:15 | 2.1    | 2.725  | 3.9875 | 2.25   | 0.5913 | 5.45    | 0.2972 | -0.7418 |
| 4/26/2019 9:16 | 2.0917 | 2.975  | 4.0122 | 2.8833 | 0.5913 | 5.6     | 0.3079 | -0.7418 |
| 4/26/2019 9:17 | 2.1    | 2.0833 | 4.0857 | 2.5833 | 0.5913 | 5.8182  | 0.3121 | -0.7418 |
| 4/26/2019 9:18 | 2.1    | 2.1167 | 3.805  | 3.0333 | 0.5913 | 6.2364  | 0.2937 | -0.7418 |
| 4/26/2019 9:19 | 2.05   | 2.2917 | 4.0507 | 2.25   | 0.5913 | 5.9     | 0.3101 | -0.7418 |

|                 |         |        |          |         |        |          |        |         |
|-----------------|---------|--------|----------|---------|--------|----------|--------|---------|
| 4/26/2019 9:20  | 2.0083  | 2.3167 | 3.8913   | 2.3833  | 0.5913 | 5.3636   | 0.3098 | -0.7418 |
| 4/26/2019 9:21  | 2       | 1.8    | 4.0007   | 2.5167  | 0.5913 | 5.2273   | 0.3011 | -0.7418 |
| 4/26/2019 9:22  | 2       | 2.2667 | 3.8538   | 2.75    | 0.5913 | 5        | 0.3174 | -0.7418 |
| 4/26/2019 9:23  | 2       | 2.6417 | 3.743    | 2.7167  | 0.5913 | 4.9      | 0.2997 | -0.7418 |
| 4/26/2019 9:24  | 1.925   | 1.975  | 3.4702   | 2.6167  | 0.5913 | 4.9      | 0.2956 | -0.7418 |
| 4/26/2019 9:25  | 1.9     | 1.9333 | 3.5117   | 2.1333  | 0.5913 | 4.9      | 0.3085 | -0.7418 |
| 4/26/2019 9:26  | 1.9     | 2.7917 | 3.6697   | 3.3167  | 0.5913 | 4.86     | 0.2915 | -0.7418 |
| 4/26/2019 9:27  | 1.9     | 2.0917 | 3.799    | 2.6     | 0.5913 | 4.2      | 0.303  | -0.7418 |
| 4/26/2019 9:28  | 1.8333  | 2.025  | 3.5393   | 1.9333  | 0.5913 | 3.85     | 0.3013 | -0.7418 |
| 4/26/2019 9:29  | 1.8     | 2.7    | 3.6883   | 2       | 0.5913 | 3.9636   | 0.2943 | -0.7418 |
| 4/26/2019 9:30  | 1.7083  | 2.2667 | 3.6647   | 1.9667  | 0.5913 | 3.25     | 0.3063 | -0.7418 |
| 4/26/2019 9:31  | 1.7     | 1.7083 | 3.532    | 1.55    | 0.5913 | 3.2      | 0.2988 | -0.7418 |
| 4/26/2019 9:32  | 1.5333  | 3.5083 | 21.4717  | 7.5833  | 0.5913 | 4.19     | 0.5268 | -0.7418 |
| 4/26/2019 9:33  | 1.125   | 7.6917 | 105.4325 | 28.7333 | 0.5913 | 45.12    | 1.4682 | -0.7418 |
| 4/26/2019 9:34  | 0.6333  | 5.2083 | 191.3167 | 36.45   | 0.5913 | 52.4455  | 2.2438 | -0.7418 |
| 4/26/2019 9:35  | 0.2833  | 5.25   | 187.125  | 33.1    | 0.5913 | 56.7273  | 2.2992 | -0.7418 |
| 4/26/2019 9:36  | 0.1333  | 7.175  | 254.7833 | 40.8333 | 0.5913 | 70.54    | 3.101  | -0.7418 |
| 4/26/2019 9:37  | 0.0583  | 7.675  | 271.2667 | 47.35   | 0.5913 | 81.14    | 3.374  | -0.7418 |
| 4/26/2019 9:38  | 0       | 7.5917 | 302.9917 | 51.3833 | 0.5913 | 86.64    | 3.833  | -0.7418 |
| 4/26/2019 9:39  | 0       | 7.9667 | 330.9833 | 52      | 0.5913 | 102.24   | 4.1013 | -0.7418 |
| 4/26/2019 9:40  | 0.0917  | 8.2    | 352.4417 | 52.3    | 0.5913 | 110.6545 | 4.4115 | -0.7418 |
| 4/26/2019 9:41  | 0.1     | 9.1583 | 389.875  | 54.15   | 0.5913 | 128.52   | 4.9316 | -0.7418 |
| 4/26/2019 9:42  | 0.0667  | 7.5667 | 405.25   | 54.2333 | 0.5913 | 124.2545 | 5.218  | -0.7418 |
| 4/26/2019 9:43  | 0.0083  | 8.3    | 386.4667 | 52.8667 | 0.5913 | 130.2    | 5.2518 | -0.7418 |
| 4/26/2019 9:44  | 0.0083  | 8.0667 | 393.7083 | 54.7333 | 0.5913 | 107.7727 | 5.6146 | -0.7418 |
| 4/26/2019 9:45  | 0.0083  | 8.6333 | 389.8083 | 53.7    | 0.5913 | 101.6    | 5.6758 | -0.7418 |
| 4/26/2019 9:46  | 0.0083  | 8.025  | 388.875  | 52.7667 | 0.5913 | 102.4364 | 5.8643 | -0.7418 |
| 4/26/2019 9:47  | 0       | 7.9833 | 379.975  | 52.2    | 0.5913 | 102.0667 | 5.9668 | -0.7418 |
| 4/26/2019 9:48  | 0       | 8.3    | 378.0333 | 52.4167 | 0.5913 | 101.5182 | 6.2107 | -0.7418 |
| 4/26/2019 9:49  | 0       | 8.175  | 371.775  | 52.1667 | 0.5913 | 100.9909 | 6.2661 | -0.7418 |
| 4/26/2019 9:50  | 0       | 8.0667 | 364.55   | 51.1667 | 0.5913 | 100.4    | 6.3528 | -0.7418 |
| 4/26/2019 9:51  | 0       | 8.2917 | 357.8667 | 50.1333 | 0.5913 | 99.875   | 6.4771 | -0.7418 |
| 4/26/2019 9:52  | 0.0167  | 8.1    | 351.7583 | 51.1    | 0.5913 | 99.3909  | 6.5123 | -0.7418 |
| 4/26/2019 9:53  | 0.0667  | 7.425  | 347.55   | 49.95   | 0.5913 | 98.9727  | 6.6526 | -0.7418 |
| 4/26/2019 9:54  | 0.025   | 7.15   | 342.125  | 49.3167 | 0.5913 | 98.45    | 6.7696 | -0.7418 |
| 4/26/2019 9:55  | 0       | 7.6667 | 331.5083 | 47.7167 | 0.5913 | 97.95    | 6.7519 | -0.7418 |
| 4/26/2019 9:56  | 0       | 7.6083 | 323.725  | 47.25   | 0.5913 | 97.2917  | 6.7953 | -0.7418 |
| 4/26/2019 9:57  | -0.0182 | 7.4583 | 320.4167 | 46.4    | 0.5913 | 96.9364  | 6.8353 | -0.7418 |
| 4/26/2019 9:58  | -0.025  | 7.9083 | 312.4167 | 46.15   | 0.5913 | 95.7182  | 6.837  | -0.7418 |
| 4/26/2019 9:59  | 0       | 7.825  | 302.5167 | 45.7167 | 0.5913 | 95.4     | 6.8183 | -0.7418 |
| 4/26/2019 10:00 | 0       | 7.0917 | 302.1    | 45.6    | 0.5913 | 96.2364  | 6.8977 | -0.7418 |
| 4/26/2019 10:01 | -0.0167 | 7.0667 | 297.4167 | 44.5    | 0.5913 | 95.9917  | 6.9161 | -0.7418 |
| 4/26/2019 10:02 | -0.0917 | 6.4917 | 293.2417 | 44.6667 | 0.5913 | 95.8455  | 6.9339 | -0.7418 |
| 4/26/2019 10:03 | 0       | 6.8417 | 286.275  | 43.95   | 0.5913 | 95.7     | 6.9051 | -0.7418 |
| 4/26/2019 10:04 | 0       | 6.5917 | 282.075  | 43.2    | 0.5913 | 95.3455  | 6.8931 | -0.7418 |
| 4/26/2019 10:05 | 0       | 6.8583 | 274.5667 | 42.7833 | 0.5913 | 94.82    | 6.8351 | -0.7418 |
| 4/26/2019 10:06 | 0       | 7.0917 | 270.9417 | 42.4333 | 0.5913 | 117.1364 | 6.8511 | -0.7418 |



|                 |         |        |          |         |        |          |        |         |
|-----------------|---------|--------|----------|---------|--------|----------|--------|---------|
| 4/26/2019 10:07 | 0       | 5.6833 | 265.975  | 41.3333 | 0.5913 | 107.47   | 6.8553 | -0.7418 |
| 4/26/2019 10:08 | 0       | 6.8333 | 259.6333 | 40.6667 | 0.5913 | 134.09   | 6.7831 | -0.7418 |
| 4/26/2019 10:09 | -0.025  | 6.4333 | 256.5167 | 40.5167 | 0.5913 | 96.1546  | 6.7952 | -0.7418 |
| 4/26/2019 10:10 | -0.1    | 6.85   | 251.1167 | 39.55   | 0.5913 | 88.9727  | 6.7372 | -0.7418 |
| 4/26/2019 10:11 | -0.1    | 6.0667 | 247.5667 | 39.2667 | 0.5913 | 95.5727  | 6.7083 | -0.7418 |
| 4/26/2019 10:12 | -0.0917 | 6.7    | 240.375  | 38.1333 | 0.5913 | 90.35    | 6.6551 | -0.7418 |
| 4/26/2019 10:13 | -0.0833 | 6.75   | 238.825  | 38.2833 | 0.5913 | 87.73    | 6.6608 | -0.7418 |
| 4/26/2019 10:14 | -0.0917 | 6.2667 | 235.1583 | 37.65   | 0.5913 | 96.94    | 6.6147 | -0.7418 |
| 4/26/2019 10:15 | -0.0333 | 6.425  | 228.8417 | 36.4    | 0.5913 | 93.1182  | 6.5505 | -0.7418 |
| 4/26/2019 10:16 | 0       | 6.0083 | 227.375  | 36.9    | 0.5913 | 91.8     | 6.5426 | -0.7418 |
| 4/26/2019 10:17 | 0       | 5.7667 | 224.3833 | 36.1667 | 0.5913 | 88.65    | 6.5324 | -0.7418 |
| 4/26/2019 10:18 | 0.0167  | 6.0417 | 220.1167 | 35.7667 | 0.5913 | 85.8667  | 6.507  | -0.7418 |
| 4/26/2019 10:19 | 0       | 6.0333 | 217.5167 | 35.15   | 0.5913 | 84.5636  | 6.4604 | -0.7418 |
| 4/26/2019 10:20 | -0.0083 | 5.9417 | 214.3167 | 34.5667 | 0.5913 | 83.8167  | 6.4388 | -0.7418 |
| 4/26/2019 10:21 | -0.1    | 6.2833 | 210.3833 | 34.6667 | 0.5913 | 83.6636  | 6.401  | -0.7418 |
| 4/26/2019 10:22 | -0.1    | 6.075  | 208.0833 | 34.0167 | 0.5913 | 83.7417  | 6.3713 | -0.7418 |
| 4/26/2019 10:23 | -0.1    | 6.0333 | 204.2917 | 33.6167 | 0.5913 | 83.7273  | 6.3299 | -0.7418 |
| 4/26/2019 10:24 | -0.1    | 5.8833 | 202.15   | 33.8667 | 0.5913 | 83.7     | 6.2874 | -0.7418 |
| 4/26/2019 10:25 | -0.1    | 4.6833 | 199.45   | 32.45   | 0.5913 | 83.6182  | 6.2878 | -0.7418 |
| 4/26/2019 10:26 | -0.1    | 5.1917 | 194.0833 | 32.4333 | 0.5913 | 83.4364  | 6.2191 | -0.7418 |
| 4/26/2019 10:27 | -0.1    | 5.7667 | 192.3    | 31.9333 | 0.5913 | 83.2273  | 6.1848 | -0.7418 |
| 4/26/2019 10:28 | -0.1    | 5.65   | 191.0083 | 31.8667 | 0.5913 | 82.9909  | 6.1789 | -0.7418 |
| 4/26/2019 10:29 | -0.1    | 5.6167 | 188.5833 | 31.3    | 0.5913 | 82.7727  | 6.1301 | -0.7418 |
| 4/26/2019 10:30 | -0.0083 | 5.7583 | 186.05   | 30.9167 | 0.5913 | 82.6167  | 6.1129 | -0.7418 |
| 4/26/2019 10:31 | 0       | 4.5083 | 181.45   | 30.4    | 0.5913 | 83.6417  | 6.0796 | -0.7418 |
| 4/26/2019 10:32 | 0.075   | 5.225  | 180.8917 | 30.15   | 0.5913 | 83.5     | 6.0402 | -0.7418 |
| 4/26/2019 10:33 | 0.1     | 5.2917 | 178.2    | 29.7667 | 0.5913 | 83.06    | 6.0295 | -0.7418 |
| 4/26/2019 10:34 | 0.1     | 4.7583 | 175.825  | 29.7    | 0.5913 | 82.6455  | 5.992  | -0.7418 |
| 4/26/2019 10:35 | 0.0333  | 4.7833 | 174.0583 | 29.5667 | 0.5913 | 82.14    | 5.9801 | -0.7418 |
| 4/26/2019 10:36 | 0.0083  | 5.3583 | 171.0167 | 29      | 0.5913 | 81.675   | 5.9434 | -0.7418 |
| 4/26/2019 10:37 | 0.0917  | 4.8417 | 169.7083 | 29.1167 | 0.5913 | 81.1917  | 5.9108 | -0.7418 |
| 4/26/2019 10:38 | 0.1     | 5.1    | 167.0833 | 28.5667 | 0.5913 | 80.8667  | 5.892  | -0.7418 |
| 4/26/2019 10:39 | 0.1     | 4.5333 | 164.0833 | 28.6167 | 0.5913 | 80.3833  | 5.8822 | -0.7418 |
| 4/26/2019 10:40 | 0.0917  | 4.7583 | 161.5083 | 27.7667 | 0.5913 | 80.07    | 5.8208 | -0.7418 |
| 4/26/2019 10:41 | 0.075   | 4.4167 | 160.6417 | 27.1167 | 0.5913 | 79.6333  | 5.821  | -0.7418 |
| 4/26/2019 10:42 | 0.0833  | 4.8917 | 158.2583 | 27.2    | 0.5913 | 79.25    | 5.777  | -0.7418 |
| 4/26/2019 10:43 | 0.0417  | 4.5917 | 155.625  | 27.0333 | 0.5913 | 80.0364  | 5.7305 | -0.7418 |
| 4/26/2019 10:44 | 0.05    | 4.3417 | 154.025  | 26.2    | 0.5913 | 111.6917 | 5.7408 | -0.7418 |
| 4/26/2019 10:45 | 0       | 4.55   | 151.4333 | 25.5667 | 0.5913 | 115.75   | 5.6709 | -0.7418 |
| 4/26/2019 10:46 | 0       | 4.875  | 150.6167 | 25.2667 | 0.5913 | 79.2909  | 5.6738 | -0.7418 |
| 4/26/2019 10:47 | -0.1    | 4.1667 | 148.125  | 25.4833 | 0.5913 | 74.35    | 5.6517 | -0.7418 |
| 4/26/2019 10:48 | -0.0667 | 3.7417 | 145.475  | 24.9667 | 0.5913 | 72.53    | 5.6018 | -0.7418 |
| 4/26/2019 10:49 | -0.0667 | 3.8333 | 142.125  | 24.6833 | 0.5913 | 73.74    | 5.5795 | -0.7418 |
| 4/26/2019 10:50 | -0.0917 | 4.325  | 143.075  | 24.8833 | 0.5913 | 73.1364  | 5.5783 | -0.7418 |
| 4/26/2019 10:51 | -0.1    | 4.6917 | 141.8667 | 23.6833 | 0.5913 | 72.775   | 5.5488 | -0.7418 |
| 4/26/2019 10:52 | -0.0583 | 3.6333 | 137.6333 | 23.95   | 0.5913 | 79.2182  | 5.489  | -0.7418 |
| 4/26/2019 10:53 | 0.0417  | 1.9583 | 98.8275  | 15.65   | 0.5913 | 78.01    | 4.2633 | -0.7418 |

|                 |         |         |         |         |        |         |        |         |
|-----------------|---------|---------|---------|---------|--------|---------|--------|---------|
| 4/26/2019 10:54 | 0.15    | 4.075   | 82.2425 | 16.35   | 0.5913 | 55.7636 | 3.6691 | -0.7418 |
| 4/26/2019 10:55 | 0.2667  | 2.6667  | 79.3817 | 15.1167 | 0.5913 | 68.8546 | 3.7486 | -0.7418 |
| 4/26/2019 10:56 | 0.3917  | 2.9583  | 54.575  | 12.1667 | 0.5913 | 67.7182 | 2.9462 | -0.7418 |
| 4/26/2019 10:57 | 0.6     | 4.4     | 47.7225 | 12.4    | 0.5913 | 35.97   | 2.6249 | -0.7418 |
| 4/26/2019 10:58 | 0.9833  | 5.35    | 41.9025 | 11.55   | 0.5913 | 23.8182 | 2.3725 | -0.7418 |
| 4/26/2019 10:59 | 1.6167  | 6.5167  | 30.7275 | 11.4167 | 0.5913 | 18.55   | 1.9409 | -0.7418 |
| 4/26/2019 11:00 | 2.1833  | 6.2917  | 27.1683 | 11.65   | 0.5913 | 24.13   | 1.7704 | -0.7418 |
| 4/26/2019 11:01 | 2.6083  | 6.1667  | 24.2133 | 10.8    | 0.5913 | 26.58   | 1.6308 | -0.7418 |
| 4/26/2019 11:02 | 2.9     | 7.775   | 19.7233 | 11.15   | 0.5913 | 26.6545 | 1.464  | -0.7418 |
| 4/26/2019 11:03 | 3.1     | 7.6083  | 17.2467 | 10.2833 | 0.5913 | 29.72   | 1.4033 | -0.7418 |
| 4/26/2019 11:04 | 3.375   | 8.3917  | 16.1717 | 11.3333 | 0.5913 | 22.325  | 1.2663 | -0.7418 |
| 4/26/2019 11:05 | 3.625   | 9.1917  | 15.585  | 11.0167 | 0.5913 | 18.9273 | 1.2095 | -0.7418 |
| 4/26/2019 11:06 | 4.05    | 9.925   | 14.8883 | 12.1667 | 0.5913 | 26.8546 | 1.1153 | -0.7418 |
| 4/26/2019 11:07 | 4.5667  | 10.2833 | 13.7333 | 11.4667 | 0.5913 | 24.75   | 1.0059 | -0.7418 |
| 4/26/2019 11:08 | 5.15    | 11.6833 | 13.3883 | 12.6    | 0.5913 | 21.4    | 0.9381 | -0.7418 |
| 4/26/2019 11:09 | 5.7333  | 11.725  | 12.8017 | 13.9333 | 0.5913 | 17.7909 | 0.8281 | -0.7418 |
| 4/26/2019 11:10 | 6.3833  | 12.7833 | 12.3833 | 14.6167 | 0.5913 | 16.3636 | 0.7471 | -0.7418 |
| 4/26/2019 11:11 | 6.7417  | 13.0083 | 14.7117 | 13.7667 | 0.5913 | 15.2636 | 0.8353 | -0.7418 |
| 4/26/2019 11:12 | 6.9667  | 12.175  | 14.95   | 14.35   | 0.5913 | 14.4636 | 0.7953 | -0.7418 |
| 4/26/2019 11:13 | 6.9667  | 12.2417 | 14.7567 | 13.9833 | 0.5913 | 13.67   | 0.7693 | -0.7418 |
| 4/26/2019 11:14 | 7.125   | 13.6417 | 14.07   | 14.8833 | 0.5913 | 12.5818 | 0.7039 | -0.7418 |
| 4/26/2019 11:15 | 7.5833  | 14.0667 | 14.4    | 15.7667 | 0.5913 | 11.8182 | 0.62   | -0.7418 |
| 4/26/2019 11:16 | 8.1833  | 15.2167 | 13.9017 | 16.4833 | 0.5913 | 11.46   | 0.5781 | -0.7418 |
| 4/26/2019 11:17 | 8.6167  | 14.775  | 14.1083 | 15.4667 | 0.5913 | 10.6455 | 0.5453 | -0.7418 |
| 4/26/2019 11:18 | 8.975   | 15.4917 | 14.3883 | 15.7833 | 0.5913 | 9.4455  | 0.528  | -0.7418 |
| 4/26/2019 11:19 | 9.3167  | 16.5083 | 14.7867 | 16.3333 | 0.5913 | 8.3273  | 0.4947 | -0.7418 |
| 4/26/2019 11:20 | 9.725   | 16.4917 | 15.0017 | 16.8833 | 0.5913 | 7.26    | 0.4656 | -0.7418 |
| 4/26/2019 11:21 | 10.1417 | 17.3417 | 15.2283 | 18.1667 | 0.5913 | 6.01    | 0.4343 | -0.7418 |
| 4/26/2019 11:22 | 10.65   | 18.525  | 15.7317 | 19.05   | 0.5913 | 5.81    | 0.3945 | -0.7418 |
| 4/26/2019 11:23 | 11.1333 | 18.675  | 16.4383 | 18.4833 | 0.5913 | 6.27    | 0.3857 | -0.7418 |
| 4/26/2019 11:24 | 11.425  | 17.625  | 16.8933 | 17.8    | 0.5913 | 6.64    | 0.4082 | -0.7418 |
| 4/26/2019 11:25 | 11.175  | 17.25   | 16.6233 | 17.9333 | 0.5913 | 6.5889  | 0.4112 | -0.7418 |
| 4/26/2019 11:26 | 10.925  | 16.9    | 16.4217 | 17.5    | 0.5913 | 7.2     | 0.3824 | -0.7418 |
| 4/26/2019 11:27 | 11.3167 | 19.0417 | 17.245  | 19.6    | 0.5913 | 7.7     | 0.342  | -0.7418 |
| 4/26/2019 11:28 | 12.0333 | 19.1833 | 17.2633 | 18.95   | 0.5913 | 7.29    | 0.3208 | -0.7418 |
| 4/26/2019 11:29 | 12.65   | 18.9083 | 17.51   | 19.2167 | 0.5913 | 7.0545  | 0.3088 | -0.7418 |
| 4/26/2019 11:30 | 12.925  | 19.6083 | 17.98   | 19.8833 | 0.5913 | 7.6667  | 0.3056 | -0.7418 |
| 4/26/2019 11:31 | 13.1917 | 20.5    | 18.0583 | 20.5    | 0.5913 | 7.9818  | 0.2824 | -0.7418 |
| 4/26/2019 11:32 | 13.4833 | 19.8    | 18.425  | 19.6667 | 0.5913 | 7.83    | 0.2768 | -0.7418 |
| 4/26/2019 11:33 | 13.7083 | 20.1417 | 18.455  | 20.25   | 0.5913 | 7.8273  | 0.2762 | -0.7418 |
| 4/26/2019 11:34 | 14      | 19.4917 | 18.575  | 21      | 0.5913 | 8.39    | 0.2602 | -0.7418 |
| 4/26/2019 11:35 | 14.425  | 21.3667 | 18.875  | 21.5833 | 0.5913 | 8.54    | 0.2399 | -0.7418 |
| 4/26/2019 11:36 | 14.8    | 21.1583 | 18.8117 | 20.6167 | 0.5913 | 7.79    | 0.2477 | -0.7418 |
| 4/26/2019 11:37 | 14.8083 | 20.575  | 19.4183 | 20.3    | 0.5913 | 7.4545  | 0.25   | -0.7418 |
| 4/26/2019 11:38 | 14.925  | 21.4333 | 19.7833 | 21.5667 | 0.5913 | 6.8     | 0.2385 | -0.7418 |
| 4/26/2019 11:39 | 14.925  | 20.9417 | 19.75   | 21      | 0.5913 | 6       | 0.2374 | -0.7418 |
| 4/26/2019 11:40 | 15.1917 | 21.2917 | 20.1017 | 21.3833 | 0.5913 | 5.42    | 0.2187 | -0.7418 |

|                 |         |         |         |         |        |        |        |         |
|-----------------|---------|---------|---------|---------|--------|--------|--------|---------|
| 4/26/2019 11:41 | 15.4    | 22.1167 | 20.5    | 22.3    | 0.5913 | 5.2545 | 0.2138 | -0.7418 |
| 4/26/2019 11:42 | 15.9167 | 22.25   | 20.9917 | 22.6167 | 0.5913 | 5.3182 | 0.2112 | -0.7418 |
| 4/26/2019 11:43 | 16.3    | 22.0917 | 20.7    | 22.6    | 0.5913 | 5.4667 | 0.1972 | -0.7418 |
| 4/26/2019 11:44 | 16.5667 | 22.9083 | 20.98   | 22.9167 | 0.5913 | 6.13   | 0.2003 | -0.7418 |
| 4/26/2019 11:45 | 16.5917 | 22.3083 | 20.5133 | 22.3333 | 0.5913 | 6.5833 | 0.1991 | -0.7418 |
| 4/26/2019 11:46 | 16.65   | 22.3083 | 20.485  | 22.6167 | 0.5913 | 6.6182 | 0.1825 | -0.7418 |
| 4/26/2019 11:47 | 16.7583 | 22.7083 | 20.9767 | 23.45   | 0.5913 | 6.4091 | 0.1938 | -0.7418 |
| 4/26/2019 11:48 | 16.9583 | 24.0583 | 21.2717 | 23.55   | 0.5913 | 6.7182 | 0.1847 | -0.7418 |
| 4/26/2019 11:49 | 17.075  | 22.9083 | 21.6    | 22.8167 | 0.5913 | 7.2083 | 0.1749 | -0.7418 |
| 4/26/2019 11:50 | 17.1917 | 23.5333 | 21.6117 | 22.5    | 0.5913 | 7.4364 | 0.1944 | -0.7418 |
| 4/26/2019 11:51 | 17.2417 | 23.825  | 21.655  | 23.1833 | 0.5913 | 7.5273 | 0.1792 | -0.7418 |
| 4/26/2019 11:52 | 17.525  | 23.0667 | 21.7833 | 24.1333 | 0.5913 | 7.6091 | 0.1741 | -0.7418 |
| 4/26/2019 11:53 | 17.6417 | 23.1917 | 21.915  | 23.6333 | 0.5913 | 7.6417 | 0.1821 | -0.7418 |
| 4/26/2019 11:54 | 17.75   | 23.7    | 22.115  | 24.2833 | 0.5913 | 7.21   | 0.17   | -0.7418 |
| 4/26/2019 11:55 | 17.8167 | 23.6167 | 21.8783 | 23.0167 | 0.5913 | 6.5917 | 0.1728 | -0.7418 |
| 4/26/2019 11:56 | 17.9667 | 23.8417 | 22.195  | 23.9833 | 0.5913 | 5.92   | 0.1735 | -0.7418 |
| 4/26/2019 11:57 | 18.2667 | 23.45   | 21.8217 | 23.6833 | 0.5913 | 5.4    | 0.1668 | -0.7418 |
| 4/26/2019 11:58 | 18.475  | 24.5167 | 22.0317 | 24.2667 | 0.5913 | 5.2273 | 0.1647 | -0.7418 |
| 4/26/2019 11:59 | 18.8167 | 25.1583 | 23.05   | 25.0667 | 0.5913 | 5.1545 | 0.1674 | -0.7418 |
| 4/26/2019 12:00 | 18.8    | 23.9917 | 22.4017 | 23.7    | 0.5913 | 4.88   | 0.1521 | -0.7418 |
| 4/26/2019 12:01 | 19.0833 | 25.3083 | 23.2083 | 25.2167 | 0.5913 | 4.42   | 0.1582 | -0.7418 |
| 4/26/2019 12:02 | 19.15   | 24.3667 | 22.7433 | 24.2167 | 0.5913 | 3.9    | 0.1666 | -0.7418 |
| 4/26/2019 12:03 | 19.1    | 23.9083 | 21.4733 | 23.0667 | 0.5913 | 3.6417 | 0.1522 | -0.7418 |
| 4/26/2019 12:04 | 18.8167 | 23.3333 | 21.9883 | 23.8333 | 0.5913 | 3.6    | 0.1674 | -0.7418 |
| 4/26/2019 12:05 | 18.6167 | 23.9833 | 22.6133 | 24.1167 | 0.5913 | 3.7    | 0.1623 | -0.7418 |
| 4/26/2019 12:06 | 18.85   | 23.7333 | 22.4467 | 23.55   | 0.5913 | 3.92   | 0.155  | -0.7418 |
| 4/26/2019 12:07 | 19.025  | 24.675  | 22.605  | 24.15   | 0.5913 | 3.76   | 0.1672 | -0.7418 |
| 4/26/2019 12:08 | 18.5167 | 20.6917 | 19.82   | 20.6833 | 0.5913 | 3.6    | 0.1619 | -0.7418 |
| 4/26/2019 12:09 | 17.5083 | 21.1417 | 19.7233 | 21.3167 | 0.5913 | 3.6909 | 0.1596 | -0.7418 |
| 4/26/2019 12:10 | 16.6917 | 21.175  | 20.8867 | 21.2833 | 0.5913 | 3.84   | 0.1786 | -0.7418 |
| 4/26/2019 12:11 | 16.2917 | 19.5917 | 19.86   | 19.5833 | 0.5913 | 3.86   | 0.1723 | -0.7418 |
| 4/26/2019 12:12 | 15.8667 | 18.85   | 18.9333 | 19.1833 | 0.5913 | 3.9545 | 0.1724 | -0.7418 |
| 4/26/2019 12:13 | 15.2917 | 18.9083 | 19.42   | 18.6    | 0.5913 | 4.1    | 0.1865 | -0.7418 |
| 4/26/2019 12:14 | 14.675  | 17.975  | 16.9217 | 17.4667 | 0.5913 | 4.1833 | 0.1673 | -0.7418 |
| 4/26/2019 12:15 | 14.15   | 17.475  | 15.73   | 17.2167 | 0.5913 | 4.1778 | 0.1847 | -0.7418 |
| 4/26/2019 12:16 | 13.625  | 16.975  | 17.6367 | 17.1333 | 0.5913 | 4.1667 | 0.188  | -0.7418 |
